# Supplementary material for: Ssl2/TFIIH function in transcription start site scanning by RNA polymerase II in Saccharomyces cerevisiae
Source: eLife. 2021 Oct 15;10:e71013. doi: 10.7554/eLife.71013 (PMC8589449; doi:10.7554/eLife.71013)
Supplement: Figure 1—source data 3. [file elife-71013-fig1-data3.csv]

Figure 1E	ssl2-rtt			ssl2-1			ssl2-DEAD			ssl2-508			rad25-ts24
	Mean	SD		Mean	SD		Mean	SD		Mean	SD		Mean	SD
Bin 1	0.004346	0.000552		0.004708	0.002084		0.004732	0.004961		-0.001159555	0.000512295		0.003862323	0.001272036
Bin 2	0.007641	0.003044		0.003553	0.004236		0.043388	0.003211		0.01257731	0.004158229		0.007523144	0.00296835
Bin 3	-0.00978	0.003756		-0.11898	0.008735		0.12449	0.020475		0.1314554	0.008506667		-0.003618843	0.01993569
Bin 4	0.001109	0.003237		-0.00012	0.003941		-0.0037	0.002091		-0.004002782	0.000671374		0.002734323	0.002114379
Bin 5	-0.01648	0.009219		0.039893	0.005078		-0.16351	0.006979		-0.1025582	0.008907067		-0.02084117	0.007958591
Bin 6	0.013163	0.001033		0.070947	0.007797		-0.0054	0.017191		-0.03631216	0.000750344		0.01034022	0.01214805
Figure 1G
	ssl2 F156S			ssl2 Y750* (XP)			ssl2 T176P
	Mean	SD		Mean	SD		Mean	SD
Bin 1	0.00098593	0.00099669		0.00275248	0.00077615		0.007829	0.001155
Bin 2	0.01376232	0.00840851		0.04715941	0.00473017		0.005001	0.001999
Bin 3	0.10488913	0.01162457		0.13552791	0.01056227		-0.00923	0.009536
Bin 4	-0.0060932	0.00274247		-0.013269	0.00082688		-0.00048	0.004421
Bin 5	-0.0912936	0.0029874		-0.1682879	0.007355		-0.04815	0.009098
Bin 6	-0.0222507	0.00246352		-0.003883	0.00614051		0.045031	0.004595
