# Supplementary material for: Ssl2/TFIIH function in transcription start site scanning by RNA polymerase II in Saccharomyces cerevisiae
Source: eLife. 2021 Oct 15;10:e71013. doi: 10.7554/eLife.71013 (PMC8589449; doi:10.7554/eLife.71013)
Supplement: Figure 2—figure supplement 2—source data 3. [file elife-71013-fig2-figsupp2-data3.csv]

	N230I			E340G			V226D			L225P			I170T			L180S			S185Y			S201Y			N320Y			N345T			K357E			K372E			G382V			K443E			F498L			Q672R			L832*
	Mean	SD		Mean	SD		Mean	SD		Mean	SD		Mean	SD		Mean	SD		Mean	SD		Mean	SD		Mean	SD		Mean	SD		Mean	SD		Mean	SD		Mean	SD		Mean	SD		Mean	SD		Mean	SD		Mean
Bin 1	0.000473	0.000691		0.000173	0.000407		0.001815	0.000346		0.006891	0.000204		0.001023	0.00088		0.001754	0.001256		-0.00023	0.000633		0.003034	0.004309		0.002361	0.001879		0.003059	0.00181		0.002358	0.002254		0.002102	0.000784		0.007002	0.001296		0.005552	0.000588		0.010263	0.001326		0.008137	0.000806		0.007723
Bin 2	-0.00269	0.001441		-0.00417	0.0011		-0.00154	0.001151		0.008832	0.001135		-0.00098	0.001219		0.0026	0.002785		0.00672	0.003847		0.019822	0.000597		0.0426	0.002361		0.048826	0.004714		-0.01092	0.004356		-0.01248	0.003933		0.042292	0.005754		0.028345	0.00346		0.073441	0.005872		0.030565	0.005285		0.042116
Bin 3	-0.1206	0.004384		-0.09646	0.002397		-0.14104	0.006049		-0.14452	0.009677		-0.0695	0.006417		-0.06027	0.00923		-0.0131	0.013879		0.040594	0.006976		0.200014	0.005087		0.211164	0.009092		-0.13665	0.00894		-0.17784	0.005343		0.122991	0.012005		0.163394	0.014118		0.145391	0.013003		0.068385	0.004657		0.135633
Bin 4	0.000336	0.000679		-0.00011	0.002812		0.002537	0.003191		0.007661	0.002653		0.002899	0.001606		0.006101	0.004698		0.003925	0.002143		0.01058	0.002167		-0.01581	0.00249		-0.01812	0.004178		0.002639	0.006613		0.00202	0.006108		-0.00656	0.005616		-0.00948	0.004149		-0.01204	0.00333		-0.00456	0.003688		-0.00999
Bin 5	0.079314	0.002006		0.055925	0.004465		0.084273	0.002017		0.006703	0.000156		0.036582	0.002145		0.017976	0.011837		-0.00611	0.016781		-0.10218	0.006803		-0.18485	0.009646		-0.21136	0.006715		0.074891	0.011362		0.103148	0.00714		-0.15376	0.003132		-0.16395	0.011136		-0.19283	0.010814		-0.10245	0.013143		-0.14798
Bin 6	0.043168	0.002451		0.044644	0.005228		0.053958	0.005416		0.114429	0.007543		0.029979	0.006737		0.031838	0.012105		0.00879	0.007793		0.028154	0.01273		-0.04431	0.002007		-0.03357	0.002885		0.067684	0.005336		0.083042	0.003929		-0.01197	0.003249		-0.02386	0.003923		-0.02423	0.008317		-0.000073	0.000852		-0.0275
[truncated: 1 more columns]
