# Supplementary material for: Ssl2/TFIIH function in transcription start site scanning by RNA polymerase II in Saccharomyces cerevisiae
Source: eLife. 2021 Oct 15;10:e71013. doi: 10.7554/eLife.71013 (PMC8589449; doi:10.7554/eLife.71013)
Supplement: Figure 2—source data 1. [file elife-71013-fig2-data1.csv]

Figure 2H	N230D			N230I
	Mean	SD		Mean	SD
Bin 1	0.001369641	0.002223854		0.000473359	0.000563933
Bin 2	0.03642108	0.001529138		-0.002692607	0.001176623
Bin 3	0.1569689	0.01728505		-0.1205982	0.003579731
Bin 4	-0.00786832	0.001841586		0.000335878	0.000554634
Bin 5	-0.1581572	0.01753237		0.07931381	0.001638074
Bin 6	-0.02873415	0.003499615		0.04316777	0.002001271
Figure 2F	E1103G			H1085Y
	Mean	SD		Mean	SD
Bin 1	0.03477206	0.002559394		-0.01557303	0.0136637
Bin 2	0.3154137	0.005127775		-0.02814597	0.005906744
Bin 3	-0.07647876	0.01399948		-0.1863567	0.08119925
Bin 4	-0.005341835	0.001075928		-0.007281377	0.01045233
Bin 5	-0.2474411	0.01195328		0.2016504	0.07095806
Bin 6	-0.02092403	0.002701993		0.03570666	0.02733295
