# Supplementary material for: Ssl2/TFIIH function in transcription start site scanning by RNA polymerase II in Saccharomyces cerevisiae
Source: eLife. 2021 Oct 15;10:e71013. doi: 10.7554/eLife.71013 (PMC8589449; doi:10.7554/eLife.71013)
Supplement: Figure 3—figure supplement 1—source data 1. [file elife-71013-fig3-figsupp1-data1.csv]

	E1103G_1	E1103G_2	H1085Y_1	H1085Y_2	N230D_1	N230D_2	R636C_1	R636C_2	SSL2WT_1	SSL2WT_2	SSL2WT_3	SSL2WT_4	SSL2WT_5	SSL2WT_6	SSL2WT_7	L225P_1	N230I_1	N230D_3	D522V_1	R636C_3	Y750_1	RPB1WT_1	E1103G_3	H1085Y_3	SSL2WT_8	L225P_2	N230I_2	N230D_4	D522V_2	R636C_4	Y750_2	RPB1WT_2	E1103G_4	H1085Y_4
E1103G_1	1	0.9232	0.6008	0.5775	0.8394	0.8472	0.746	0.735	0.7726	0.779	0.7788	0.7737	0.7301	0.7252	0.7353	0.7134	0.6865	0.8093	0.7957	0.7091	0.7997	0.7642	0.86	0.5508	0.7452	0.7107	0.6917	0.8194	0.7813	0.7171	0.8003	0.7614	0.8816	0.5579
E1103G_2	0.9232	1	0.6475	0.6028	0.8505	0.8559	0.7702	0.762	0.7926	0.8024	0.7945	0.7978	0.7378	0.7303	0.7415	0.7196	0.6928	0.8127	0.8018	0.7184	0.8077	0.7762	0.8532	0.5811	0.7518	0.7211	0.6998	0.8279	0.7829	0.7255	0.81	0.7735	0.8898	0.5862
H1085Y_1	0.6008	0.6475	1	0.9236	0.6894	0.6842	0.7996	0.7959	0.7762	0.7824	0.7709	0.7785	0.7375	0.7308	0.7399	0.7647	0.7565	0.6229	0.652	0.7737	0.696	0.7714	0.5757	0.8908	0.7531	0.765	0.761	0.6305	0.6426	0.7782	0.7048	0.7622	0.5651	0.8879
H1085Y_2	0.5775	0.6028	0.9236	1	0.6418	0.6416	0.7813	0.7746	0.7528	0.7557	0.7491	0.751	0.7189	0.7135	0.7243	0.7504	0.7441	0.5971	0.6198	0.7646	0.6786	0.7573	0.5581	0.8796	0.7367	0.7471	0.7439	0.5975	0.6153	0.7671	0.6876	0.7467	0.5589	0.876
N230D_1	0.8394	0.8505	0.6894	0.6418	1	0.9368	0.8179	0.8122	0.8522	0.8581	0.8497	0.8556	0.7757	0.7689	0.7799	0.7391	0.7106	0.8782	0.8583	0.7625	0.8627	0.8208	0.7904	0.6203	0.795	0.7399	0.7155	0.8632	0.8394	0.769	0.866	0.8221	0.808	0.628
N230D_2	0.8472	0.8559	0.6842	0.6416	0.9368	1	0.8167	0.809	0.8493	0.8558	0.8491	0.8524	0.7871	0.782	0.7924	0.7471	0.7194	0.889	0.8688	0.7657	0.8669	0.824	0.7945	0.6172	0.804	0.7464	0.7248	0.8744	0.8465	0.7737	0.8697	0.8234	0.8098	0.6251
R636C_1	0.746	0.7702	0.7996	0.7813	0.8179	0.8167	1	0.9254	0.9098	0.9128	0.9074	0.9094	0.8565	0.8532	0.8604	0.8514	0.8549	0.7572	0.7816	0.8879	0.8123	0.8741	0.7159	0.7418	0.8727	0.8511	0.8461	0.7444	0.7713	0.8954	0.8155	0.8811	0.7144	0.7438
R636C_2	0.735	0.762	0.7959	0.7746	0.8122	0.809	0.9254	1	0.9147	0.9113	0.9071	0.9103	0.8481	0.8441	0.8474	0.8389	0.8458	0.743	0.7717	0.8733	0.7949	0.8574	0.7046	0.7348	0.8633	0.8395	0.8342	0.7293	0.7613	0.8838	0.798	0.874	0.7013	0.7321
SSL2WT_1	0.7726	0.7926	0.7762	0.7528	0.8522	0.8493	0.9098	0.9147	1	0.929	0.921	0.9324	0.858	0.8519	0.8572	0.8316	0.8319	0.7904	0.8033	0.864	0.8398	0.8808	0.7359	0.7205	0.876	0.8358	0.824	0.7743	0.786	0.8727	0.8413	0.898	0.747	0.719
SSL2WT_2	0.779	0.8024	0.7824	0.7557	0.8581	0.8558	0.9128	0.9113	0.929	1	0.9219	0.929	0.8576	0.8521	0.8598	0.8339	0.8314	0.798	0.8081	0.8705	0.8507	0.8884	0.7447	0.7271	0.877	0.8386	0.8262	0.7846	0.7901	0.8746	0.8509	0.9001	0.7564	0.7276
SSL2WT_3	0.7788	0.7945	0.7709	0.7491	0.8497	0.8491	0.9074	0.9071	0.921	0.9219	1	0.9197	0.8576	0.8553	0.8583	0.8269	0.8247	0.7843	0.7977	0.8538	0.8343	0.8732	0.7432	0.712	0.8695	0.8217	0.8121	0.7701	0.7828	0.8614	0.8362	0.8839	0.7439	0.7098
SSL2WT_4	0.7737	0.7978	0.7785	0.751	0.8556	0.8524	0.9094	0.9103	0.9324	0.929	0.9197	1	0.8559	0.8493	0.855	0.8319	0.8302	0.7953	0.8062	0.8665	0.8461	0.8838	0.7386	0.7247	0.8739	0.8369	0.8232	0.7813	0.7852	0.8727	0.8469	0.8985	0.7552	0.7231
SSL2WT_5	0.7301	0.7378	0.7375	0.7189	0.7757	0.7871	0.8565	0.8481	0.858	0.8576	0.8576	0.8559	1	0.936	0.942	0.8875	0.8866	0.821	0.8362	0.8812	0.8309	0.8851	0.7292	0.7225	0.9313	0.8687	0.8742	0.7918	0.8018	0.8911	0.8319	0.8831	0.7347	0.7274
SSL2WT_6	0.7252	0.7303	0.7308	0.7135	0.7689	0.782	0.8532	0.8441	0.8519	0.8521	0.8553	0.8493	0.936	1	0.94	0.8797	0.8782	0.8092	0.8267	0.8719	0.8213	0.8763	0.7227	0.7098	0.9223	0.8542	0.8625	0.78	0.7944	0.8789	0.8231	0.8713	0.7231	0.7153
SSL2WT_7	0.7353	0.7415	0.7399	0.7243	0.7799	0.7924	0.8604	0.8474	0.8572	0.8598	0.8583	0.855	0.942	0.94	1	0.8933	0.8883	0.8262	0.8383	0.8881	0.8383	0.892	0.7334	0.7245	0.9369	0.8715	0.8775	0.7972	0.8066	0.8952	0.8399	0.8859	0.7393	0.7316
L225P_1	0.7134	0.7196	0.7647	0.7504	0.7391	0.7471	0.8514	0.8389	0.8316	0.8339	0.8269	0.8319	0.8875	0.8797	0.8933	1	0.9129	0.7859	0.7921	0.8869	0.8225	0.8745	0.7126	0.7624	0.8965	0.9329	0.9069	0.7616	0.7641	0.8937	0.819	0.8678	0.7269	0.7668
N230I_1	0.6865	0.6928	0.7565	0.7441	0.7106	0.7194	0.8549	0.8458	0.8319	0.8314	0.8247	0.8302	0.8866	0.8782	0.8883	0.9129	1	0.7567	0.7678	0.8797	0.7877	0.8592	0.688	0.7458	0.8894	0.9014	0.9389	0.7326	0.741	0.8902	0.7809	0.8602	0.6962	0.752
N230D_3	0.8093	0.8127	0.6229	0.5971	0.8782	0.889	0.7572	0.743	0.7904	0.798	0.7843	0.7953	0.821	0.8092	0.8262	0.7859	0.7567	1	0.9253	0.7894	0.8892	0.8382	0.7899	0.6226	0.8356	0.7877	0.7668	0.934	0.8719	0.7915	0.8761	0.8307	0.833	0.6329
D522V_1	0.7957	0.8018	0.652	0.6198	0.8583	0.8688	0.7816	0.7717	0.8033	0.8081	0.7977	0.8062	0.8362	0.8267	0.8383	0.7921	0.7678	0.9253	1	0.8015	0.8672	0.8383	0.7892	0.637	0.8455	0.7928	0.7729	0.8994	0.8955	0.8094	0.8554	0.8363	0.8094	0.6438
R636C_3	0.7091	0.7184	0.7737	0.7646	0.7625	0.7657	0.8879	0.8733	0.864	0.8705	0.8538	0.8665	0.8812	0.8719	0.8881	0.8869	0.8797	0.7894	0.8015	1	0.8571	0.9228	0.7146	0.7816	0.9056	0.8928	0.8833	0.7638	0.7778	0.943	0.854	0.9185	0.7484	0.7906
Y750_1	0.7997	0.8077	0.696	0.6786	0.8627	0.8669	0.8123	0.7949	0.8398	0.8507	0.8343	0.8461	0.8309	0.8213	0.8383	0.8225	0.7877	0.8892	0.8672	0.8571	1	0.8998	0.7925	0.6964	0.858	0.8325	0.7986	0.8744	0.8325	0.8483	0.947	0.8913	0.8355	0.7067
RPB1WT_1	0.7642	0.7762	0.7714	0.7573	0.8208	0.824	0.8741	0.8574	0.8808	0.8884	0.8732	0.8838	0.8851	0.8763	0.892	0.8745	0.8592	0.8382	0.8383	0.9228	0.8998	1	0.769	0.7785	0.912	0.8767	0.8613	0.8226	0.8111	0.9186	0.8988	0.9387	0.7964	0.781
E1103G_3	0.86	0.8532	0.5757	0.5581	0.7904	0.7945	0.7159	0.7046	0.7359	0.7447	0.7432	0.7386	0.7292	0.7227	0.7334	0.7126	0.688	0.7899	0.7892	0.7146	0.7925	0.769	1	0.5562	0.7484	0.7117	0.6937	0.7949	0.8174	0.7257	0.7901	0.7662	0.8667	0.5616
H1085Y_3	0.5508	0.5811	0.8908	0.8796	0.6203	0.6172	0.7418	0.7348	0.7205	0.7271	0.712	0.7247	0.7225	0.7098	0.7245	0.7624	0.7458	0.6226	0.637	0.7816	0.6964	0.7785	0.5562	1	0.7427	0.7663	0.7516	0.6217	0.613	0.776	0.7025	0.7592	0.5789	0.9339
SSL2WT_8	0.7452	0.7518	0.7531	0.7367	0.795	0.804	0.8727	0.8633	0.876	0.877	0.8695	0.8739	0.9313	0.9223	0.9369	0.8965	0.8894	0.8356	0.8455	0.9056	0.858	0.912	0.7484	0.7427	1	0.8953	0.8902	0.8115	0.8293	0.9216	0.8644	0.9143	0.7621	0.7506
L225P_2	0.7107	0.7211	0.765	0.7471	0.7399	0.7464	0.8511	0.8395	0.8358	0.8386	0.8217	0.8369	0.8687	0.8542	0.8715	0.9329	0.9014	0.7877	0.7928	0.8928	0.8325	0.8767	0.7117	0.7663	0.8953	1	0.9126	0.7716	0.7735	0.9009	0.827	0.8816	0.7382	0.7761
N230I_2	0.6917	0.6998	0.761	0.7439	0.7155	0.7248	0.8461	0.8342	0.824	0.8262	0.8121	0.8232	0.8742	0.8625	0.8775	0.9069	0.9389	0.7668	0.7729	0.8833	0.7986	0.8613	0.6937	0.7516	0.8902	0.9126	1	0.7485	0.7534	0.8955	0.7915	0.8674	0.7099	0.7669
N230D_4	0.8194	0.8279	0.6305	0.5975	0.8632	0.8744	0.7444	0.7293	0.7743	0.7846	0.7701	0.7813	0.7918	0.78	0.7972	0.7616	0.7326	0.934	0.8994	0.7638	0.8744	0.8226	0.7949	0.6217	0.8115	0.7716	0.7485	1	0.86	0.7686	0.8627	0.8178	0.8399	0.6354
D522V_2	0.7813	0.7829	0.6426	0.6153	0.8394	0.8465	0.7713	0.7613	0.786	0.7901	0.7828	0.7852	0.8018	0.7944	0.8066	0.7641	0.741	0.8719	0.8955	0.7778	0.8325	0.8111	0.8174	0.613	0.8293	0.7735	0.7534	0.86	1	0.7979	0.835	0.8161	0.7869	0.6289
R636C_4	0.7171	0.7255	0.7782	0.7671	0.769	0.7737	0.8954	0.8838	0.8727	0.8746	0.8614	0.8727	0.8911	0.8789	0.8952	0.8937	0.8902	0.7915	0.8094	0.943	0.8483	0.9186	0.7257	0.776	0.9216	0.9009	0.8955	0.7686	0.7979	1	0.852	0.9222	0.746	0.7844
Y750_2	0.8003	0.81	0.7048	0.6876	0.866	0.8697	0.8155	0.798	0.8413	0.8509	0.8362	0.8469	0.8319	0.8231	0.8399	0.819	0.7809	0.8761	0.8554	0.854	0.947	0.8988	0.7901	0.7025	0.8644	0.827	0.7915	0.8627	0.835	0.852	1	0.8912	0.8346	0.713
RPB1WT_2	0.7614	0.7735	0.7622	0.7467	0.8221	0.8234	0.8811	0.874	0.898	0.9001	0.8839	0.8985	0.8831	0.8713	0.8859	0.8678	0.8602	0.8307	0.8363	0.9185	0.8913	0.9387	0.7662	0.7592	0.9143	0.8816	0.8674	0.8178	0.8161	0.9222	0.8912	1	0.7963	0.7676
E1103G_4	0.8816	0.8898	0.5651	0.5589	0.808	0.8098	0.7144	0.7013	0.747	0.7564	0.7439	0.7552	0.7347	0.7231	0.7393	0.7269	0.6962	0.833	0.8094	0.7484	0.8355	0.7964	0.8667	0.5789	0.7621	0.7382	0.7099	0.8399	0.7869	0.746	0.8346	0.7963	1	0.5862
H1085Y_4	0.5579	0.5862	0.8879	0.876	0.628	0.6251	0.7438	0.7321	0.719	0.7276	0.7098	0.7231	0.7274	0.7153	0.7316	0.7668	0.752	0.6329	0.6438	0.7906	0.7067	0.781	0.5616	0.9339	0.7506	0.7761	0.7669	0.6354	0.6289	0.7844	0.713	0.7676	0.5862	1
