# Supplementary material for: Ssl2/TFIIH function in transcription start site scanning by RNA polymerase II in Saccharomyces cerevisiae
Source: eLife. 2021 Oct 15;10:e71013. doi: 10.7554/eLife.71013 (PMC8589449; doi:10.7554/eLife.71013)
Supplement: Figure 3—source data 1. [file elife-71013-fig3-data1.csv]

	D522V_S5	E1103G_S9	H1085Y_S10	L225P_S2	N230D_S4	N230I_S3	R636C_S6	WT_S1	Y750_S7
D522V_S5	1	0.8359	0.6883	0.8085	0.9052	0.786	0.8254	0.8496	0.8735
E1103G_S9	0.8359	1	0.6786	0.7621	0.8777	0.7382	0.8064	0.8322	0.8465
H1085Y_S10	0.6883	0.6786	1	0.7927	0.7189	0.7826	0.818	0.8067	0.7442
L225P_S2	0.8085	0.7621	0.7927	1	0.7863	0.9199	0.8873	0.8787	0.8449
N230D_S4	0.9052	0.8777	0.7189	0.7863	1	0.7611	0.8435	0.8795	0.896
N230I_S3	0.786	0.7382	0.7826	0.9199	0.7611	1	0.8812	0.8692	0.8093
R636C_S6	0.8254	0.8064	0.818	0.8873	0.8435	0.8812	1	0.931	0.8613
WT_S1	0.8496	0.8322	0.8067	0.8787	0.8795	0.8692	0.931	1	0.8854
Y750_S7	0.8735	0.8465	0.7442	0.8449	0.896	0.8093	0.8613	0.8854	1
