# Supplementary material for: Ssl2/TFIIH function in transcription start site scanning by RNA polymerase II in Saccharomyces cerevisiae
Source: eLife. 2021 Oct 15;10:e71013. doi: 10.7554/eLife.71013 (PMC8589449; doi:10.7554/eLife.71013)
Supplement: Figure 4—figure supplement 1—source data 1. [file elife-71013-fig4-figsupp1-data1.csv]

	V1	V2	V3	V4	V5	V6	V7	V8	V9	V10	V11	V12	V13	V14	V15	V16	V17	V18	V19	V20	V21	V22	V23	V24	V25	V26	V27	V28	V29	V30	V31	V32	V33	V34	V35	V36	V37	V38	V39	V40	V41	V42	V43	V44	V45	V46	V47	V48	V49
1	0	0	0	0	0	0	0	0	0	0	0	0	-6.05746352195467e-05	0	0	0	0.000864463629133577	0	0	0	0	0	0	0	0	0	-6.05746352195467e-05	0	0	0	0	0	0	0	0	-0.000121149270439093	0	0	-6.05746352195467e-05	0	0	0	0	0	-0.000121149270439093	0	0.000288154543044526	0	0
2	0.000780280745012055	0	0	0	0	0	0	0	0	0	0	0	0	0	0	0	0	0	0	0	0	0	0	0	0	0	0	0	-0.000415498078321388	0	0	0	0	0	0	0	0	0	0	0	0	0	0	0	0	0	0	0	0
3	0	0	0	0	0	0	0	0	0	0	0	0	0	0	0	-0.0125504633212709	0	0	0	0	-0.00209174388687849	0	0	0	0	0	0	0	0	0	-0.0230091827556634	0.0158161113454239	-0.00836697554751396	-0.00418348777375698	0	0	0	0	0	0	0	0	0	0	0	-0.00418348777375698	-0.0146422072081494	0	0
4	0	0	0	0	0	0	0	0	0	0	0	0	0	0	0	0	0	0	0	0	0	0	0	0	0	0	0	0	0	0	0	0	0	0	0	0	0	0	0	0	0	0	0	0	0	0	0	0	0
5	0	0	0	0	0	0	0	0	0	0	0	0	0	0	0	0	0	0.0383337592639918	0	0	0	0	-0.0202101859337106	0	0.0060411911100937	0	0	0	0	0	0	0	0	0	0	0	0	0	0	0	0	0	0	0	0	0	0	0	0
6	0	0	0	0	0	0	-0.00124500441976569	0	0	0	0	0	0	0.00605840300496789	0	0	0	0.00178419708271826	0	0	0	0	0	0.0108718015901701	0	-0.0031958205963445	0	0.00302920150248395	0	0.00302920150248395	0	0	0.0048133985852022	0	0	0	0.00302920150248395	0	-0.0031958205963445	0	0	0	-0.00249000883953138	0	0	0	0	0	0
7	0	0	0	-0.00287505031338048	0	0	0	0	0	0	0	-0.00287505031338048	0	0	0	0	0	0	0	0	0	0	0	0	0	0	0	0	0	0	0	0	0	0	0	0	0	0	-0.00575010062676097	0	0	0	0	0	0	0	0	0	0
8	0	0	0	-0.00266418009857466	0	0	0	0	0	0	0	0	0	0	0	0	0	0	0	0.00297805175853956	0	0	0	0	0	0	-0.00532836019714933	0	0	0	-0.00235030843860977	0	0	0	0	-0.00799254029572399	-0.00266418009857466	0	-0.00266418009857466	0	0	0	0	0	0	0	-0.00266418009857466	0	0
9	0	0	0.000461120615319349	0	0	0	0	0	0	-0.000155240933929459	0	0	0	-0.000155240933929459	0	-0.000931445603576751	-0.000155240933929459	0	0.00013683218805336	0	0	0	0	0	0	0	-0.000155240933929459	0	0	0	0	0.000461120615319349	0	0	-0.000155240933929459	0	0	0	0	0	0	0	0	0	0	0	0	0	0
10	0	0	0	0	0	0	0	0	0	0	0	-0.00883080183680678	0	0	0	0	0	0	0	0	0	0	0	0	0	0	0	0	0	0	0	0	0	0	0	0	0	0	0	0	-0.00883080183680678	0	0	0	0	0	0	0	0
11	-0.0038249694002448	-0.0076499388004896	0	0	-0.0076499388004896	-0.00113411680119102	-0.0038249694002448	0	0.00874125874125874	0.0098325786820279	-0.198368797665003	-0.0038249694002448	-0.0732254281825885	0.0742953496931466	-0.0038249694002448	0.0262237762237762	0	0.0202054677268875	0	0	0	0	0	0.00874125874125874	0	0.0174825174825175	0	0	0.0120152185635662	-0.0038249694002448	0	0.100497727486711	0.00874125874125874	0	-0.0152998776009792	0	0.0136575480822727	0.0469802535286011	0.15679164776472	0	-0.0114749082007344	0.0245814467050697	0.0420532649724812	0.425004921638949	-0.0038249694002448	-0.0114749082007344	0.00491628934101394	-0.0409940426770291	0.167662050311989
12	0	0	0	0	0	0	0	0	0	-0.0039941685139696	0	-0.00998542128492401	0	0	0	0	-0.0039941685139696	0	0	0	0	0	0	0	0	0	0	0	0	0	0	0	0	0	0	0	0	0	0	0	0	0	0	0	0	0	-0.0039941685139696	0	0
13	0	0	0	0	0	0	0	0	0	0	0	0	0	0	0	0	0	0	0	0	0	-0.00341093203717916	0	0	0	0	-0.00682186407435832	0	0	0	0	0	0	-0.00682186407435832	0	0	-0.00170546601858958	0	0	0	0	0	0	0	0	0	0	0	0
14	0	0	-0.019005986885869	0	0	0	0	0	0	0	0	0	0	0	0	0	0	0	0	-0.00950299344293452	0	0	0	0	0	0	0	0	0	0	0	0	-0.00950299344293452	0	0	0	0	0	0	0	0	0	0	0	0	0	0.0449034575662326	0	0
15	0	0	0	0	0	0	0	0	0	0	0	0	0	0	0	0	0	0	0	0	0	0	0	0	0	0	0	0	0	0	0	0	0	0	0	0	0	0	0	0	0	0	0	0	0	0	0	0	0
16	0	0	0	0	0	0	0	0	0	0	0	0	0	0	0	0	0	0	0	0	0	0	0	0	0	0	0	0	0	0	0	0	0	0	0	0	0	0	0	0	0	0	0	0	0	0	0	0	0
17	-0.00852805730854511	0	0	0	0	0	0	0	0	0	0	0	0	0	-0.0170561146170902	0	0	0	0	0	0	0	0	0	0	0	0	0	0	0	0	0	0	0	0	0	0	0	0	0	0	0	0	0	0	0	0	0	0
18	0	0	0	0	0	0	0	0	0	0	0	0	0	0	0	0	0	0	0	0	0	0	0	0	0	0	0	0	0	0	0	0	0	0	0	0	0	-0.000620385880017371	0	0.00207965061869606	0	0	0	0	0	0	-0.000620385880017371	-0.00186115764005211	0
19	0	0	0	0	0	0	0	0	0	0	0	0	0	0	0	0	0	0	0	0	0	0	0	0	0	0	0	0	0	0	0	0	0	0	0	0	0	0	0	0	0	0	0	0	0	0	0	0	0
20	0	0	0	0	0	0	0	0	0	0	0	0	0	0	0	0	0	0	0	0	0	0	0	0	0	0	-0.0211999152003392	0	0	0	0	0	-0.0211999152003392	0	0	-0.0211999152003392	0	0	0	0	0	0	0	0	0	0	0	0	-0.0423998304006784
21	0	0	0	0	0	0	0	0	0	0	0	0	0	0	0	0	0	0	0	0	0	0	0	0	0	0	0	0	0	0	0	0	0	0	0	0	0	0	0	0	0	0	0	0	0	0	0	0	0
22	0	0	0	0	0	0	0	0	0	-0.00304645849200305	0.0156193054615505	-0.00609291698400609	0	0	0	0	-0.00304645849200305	0	0	0	0	0.0104128703077003	0	0	0	0	0	0	0	0	0.0156193054615505	0	0	0	0	0	0	0	0	0	-0.00304645849200305	0.00520643515385016	0	0	0	-0.00304645849200305	0	0	0
23	0	0	0	0	0	0	0	0	0	0	0	0	0	0	0.115807759119861	0	0	0	0	0	0	0	0	0	0	0	0	0	0	0	0	0	0	0	0	0	0	0	0	0	0	0	0	0	0	0	0	0	0
24	0	0	0	-0.0195155799379838	0	0	0	-0.0348552979158445	-0.00216839777088709	-0.0155006515595117	0.00211475324367008	0	0	-0.023959664534192	-0.00433679554177418	0.00861994655633135	0	0.00645154878544426	-0.227896344052013	0.0150714953417756	-0.0737255242101611	0	0	0	-0.0130103866253225	-0.0195692244652008	-0.00216839777088709	0	0	0	0	0	0	0.025806195141777	0	0	-0.00867359108354837	-0.00216839777088709	0	0	-0.0434215999449588	0	0	-0.0151787843962096	0	0.0040685729056892	-0.00216839777088709	0	0
25	0	0	0	0	0	0	0	0	0	0	0	0	0	0	0	-0.000570057176734827	0	0	0	0	0	0	0	0	0	0	0	0	0	0	0	0	0	0	0	0	0	0	0	0	0	0	-0.000285028588367413	0	0	0	0.000775903539671948	0	0
26	0	0	0	0	0	-0.0663129973474801	0	0	0	0.0458324428744432	0	0	0	0.23696682464455	0	0	-0.0331564986737401	0	0	0	-0.0331564986737401	0	0	0	0	0	0	-0.0331564986737401	0	0	0	0	0	0	0	0	0	0.0789889415481833	0	0	0	0	0	0	0	0	0	0.124821384422627	0
27	0	0	0	0	0	0	0	0	0	0	0	0	0	0	0	0	0	0	0	0	0	0	0	0	0	0	0	0	0	0	0	0	0	0	0	0	0	0	0	0	0	0	0	0	0	0	0	0	0
28	0	0	0	0	0	0	0	0	0	0	0	0	0	-0.00141123341800734	0	-0.00141123341800734	0	0	0	0	0	0	0	0	0	0	0	0	0	0	0	0	0	0	0	0	0	0.00330011220381493	0	0	0	0	0	0	0	0	0	0	0
29	0	0	0.0592475560383134	0	0.0296237780191567	0.337916216289347	0	0	0	0.118495112076627	-0.0038472636337405	0	0.274821396617294	0	0	-0.00192363181687025	0	0	0.0556567259932739	0	0.190053759782265	0	0	0.111057018397847	0	0	1.21624133721037	-0.0038472636337405	0	0	-0.00192363181687025	0.0833568721955604	0.00987459267305224	0.0394983706922089	0	0	0.0178255535292343	0	0	0	0	0	0	-0.00961815908435125	0	-0.00192363181687025	0	0	0.0296237780191567
30	0	0.0127161749745677	0	0	0	0	0	0	0	0	0	0	0	0	0	0.003996180974892	0.0190742624618515	0	0	0.030046438636484	0	0	0	0	0	0	0	0	0	0	0	0.00635808748728383	0	0	0	0	0	0	-0.00405104314360948	0	0	0	0	0	0	0	0	0	0
31	0	0	0	0	0	0	0	0	0	0	0	0	0	0	0	0	0	0	0	0	0	0	0	0	0	0	0	0	0	0	0	0	0	0	0	0	0	0	0	0	0	0	0	0	0	0	0	0	0
32	0	0	0	0	0	0	0	0	0	0	0	0	0	0	0	0	0	0	0	0	0	0	0	0	0	0	0	0	0	-0.00337001027853135	0	0	0	0	0	0	0	0	0	0	0	0	0	0	0	0	0	0	0
33	0	0	0	0	0	0	0	0	0	0	0	0	0	0	0	0	0	0	0	0	0	0	0	0	0	0	0	0	0	0	0	0	0	0	0	0	0	0	0	0	0.0136091453456723	0	0	0	0	0	0	0	0
34	0	0	0	0	0	0	0	0	0	0	0	0	0	0	0	0	0	0	0	0	0	0	0	0	0	0	0	0	0	0	0	0	0	0	0	0	0	0	0	0	0	0	0	0	0	0	0	0	0
35	0	0	0	0	0	0	0	0	0	0	0	0	0	0	0	0	0	0	0	0	0	0	0	0	0	0	0	0	0	0	0	0	0	0	0	0	0	0	0	0	0	0	0	0	0	0	0	0	0
36	0	0	0	0	0	0	0	0	0	0	0	0	0	0	0	0	0	0	0	0	0	0	0	0	0	0	0	0	0	0	0	0	0	0	0	0	0	0	0	0	0	0	0	-0.0317662007623888	0	0	0	0	-0.0731444261373606
37	0	0	0	0	0	0	0	0	0	0	0	0	0	0	0	0.0234246896228625	0	0	0	0	0	0	0	0	0	-0.00943663300934227	0	0	0	0	0	0	0	0	0	0	0	0	0	0	0	0	0	0	0	0	0	0	0
38	-27.6628684391728	-0.429799426934097	-0.0955109837631328	-4.47863219386509	-0.143266475644699	-1.24164278892073	-0.0477554918815664	-0.382043935052531	-0.955109837631328	-0.0955109837631328	-0.0477554918815664	-0.0955109837631328	0	-7.67825014993003	-1.19388729703916	0	-0.0477554918815664	-0.143266475644699	-0.238777459407832	0	0	-0.907354345749761	0	0	-0.573065902578797	0	0	0	-0.238777459407832	0	-0.429799426934097	0	-1.35583949712357	0	-0.143266475644699	-0.573065902578797	-1.38490926456543	-0.0477554918815664	-0.0955109837631328	-0.0477554918815664	0	-0.0955109837631328	0	-0.0477554918815664	0	-0.573065902578797	-0.0477554918815664	0	-0.0955109837631328
39	0	0.0055781988193471	0	-0.215117176593296	0	-0.0727058155849117	-0.00521893429361724	0	0	0.016734596458041	-0.00689870163720132	-0.0574082772297897	-0.0104378685872345	-0.00521893429361724	-0.107378956033783	-0.0260946714680862	-0.00521893429361724	-0.131973492421151	0	-0.0156568028808517	0	-0.00521893429361724	0	-0.0156568028808517	0	0	0	-0.00521893429361724	0	0	0	0	-0.0104378685872345	0	0	0	0	0	0	0	0	0	0	0	0	0	0	0	0
40	0	0	0	0	0	0	0	0	0	0	0	0	0	0	0	0	0	0	0	0	0	0	0	0	0	0	0	0	0	0	0.0105680317040951	0	0	0	0	0	0	0	0	0	0	-0.00708340711882415	0	0	0	0	0	0	0
41	0	0	0	0	0	0	0	0	0	0	0	0	0	0	0	0	0	0	0	0	0	0	0	0	0	0	0	0	0	0	0	0	0	0	0	0	0.0346500346500346	0	0	0	0	0	0	0.0346500346500346	0	0	0	0	0
42	0	0	0	-0.00456746140495113	0	0	0	0	0	0	0	0	0	0	0	0	0	0	0	0	0	0	0	0	0	0	0	0	0	0	-0.0274047684297068	0	0	0	0	0	0	0	0	0	0	0	0	0	0	0	0	0	0
43	0	0	0	0	0	0.00247905201051118	0	0	-0.00147898364244091	0	0	0.00100006836807027	0	-0.00443695092732274	-0.00295796728488183	0	0	-0.00295796728488183	0	0	0	0	0	0	0	0	0	0	0	0	0	0	0	0	0.00100006836807027	0	0	0	0	0	0	0	0	0	0	0	0	0	0
44	0	0.0723065798987708	0	0	0	0	0	0	0	0	0	0	0	0	0	0	0	0	0	0	0	0	0	0	0	0	0	0	0	0	0	0	0	0	0	0	0	0	0	0	0	0	0	0	0	0	0	0	0
45	0	-0.230289894337578	0	-0.0541858574911948	0	-0.102164610427954	0	-0.0135464643727987	0	0	0	0	0	0	0	0	0	0	0	0	0	0	0	0	0	0	0	0	0	0	0	0	0	0	0	0	0	0	0	0	0	0	0	0	0	0	0	0	0
46	0	0	0	0	0	0	0	0	0	0	0	0	0	0	0	0	0	0	0	0	0	0	0	0	0	0	0	0	0	0	0	0	0	0	0	0	0	0	0	0	0	0	0	0	0	0	0	0	0
47	-0.00486641685726799	0	0	0	0	-0.00729962528590199	0.060723828030119	0	0	0	0	0	0	-0.002433208428634	0	-0.002433208428634	0	0	0	0	0	0	0	-0.002433208428634	-0.00486641685726799	0	-0.002433208428634	0	0.0121447656060238	0	-0.00486641685726799	-0.00729962528590199	0	0	0	0	0	0	0	0	0	0	0	0	0	0	0	0	0
48	0	0	0	0	0	0	0	0	0	0	0	0	0	0.161290322580645	0	0	0	0	0	0	0	0	0	0	-0.0786472670074715	-0.155296639732091	-0.157294534014943	-0.27526543452615	-0.314589068029886	-0.0393236335037357	0	0	-0.0393236335037357	0	0	0.324578539444142	0.0413215277865869	0	0.0806451612903226	-0.0393236335037357	0	0	0	0.0413215277865869	0	0	0	-0.0393236335037357	-0.0786472670074715
49	0	0	0	0	0	0	0	0	0	0	0	0	0	0	0	0	0	0	0	0	0	0	0	0	0	0	0	0	0	0	0	0	0	0	0	0	0	0	0	0	0	0	0	0	0	0	0	0	0
50	0	-0.00138890817928027	0	0	0	0	0	0	0	7.48437469878802e-05	0	0	-0.00138890817928027	0	0	0	0	-0.00277781635856054	0	0	-0.00138890817928027	0	-0.00277781635856054	0	0	0	0	0	0	0	0	0	0	0	0	0	-0.00138890817928027	0	0	0	0	0	0	0	0	0	0	0	0
51	0	0	0	0	0.160599571734475	0	0	0	0	0	0	0	0	0	0	0	0	0	0	0	0	0	0	0	0	0	0	0	0	0	0	0	0	0	0	0	0	0	0	0	0	0	0	0	0	0	0	0	0
52	0	0	0	0	0	0	0	0	0	0	0	0	0	0	0	0	0	0	0	0	0	0	0	0	0	0	0	0	0	0	0	0	0	0	0	0	0	0	0	0	0	0	0	0	0	0	0	0	0
53	0	-0.00132488937173746	0	0	0	0	0	0.00999700089973008	0	0	0	-0.0012444485561387	-0.00132488937173746	-0.00264977874347492	0	0	0	-0.00264977874347492	0	0	0	-0.00132488937173746	0	0.000722775297567859	0.0186691124277227	-0.0066244468586873	0.00666466726648672	0	0	0	0.0020074442615059	0.00666466726648672	0	0.00333233363324336	0	0	0.00533977789474926	0	0	0.0134097753485723	0	0	0.00333233363324336	0	0	0	0	0	0
54	0	0	0	0	0	0	0	0	0	0	0	0	0	0	0	0	0	0	0	0	0	0	0	0	0	0	0	0	-0.00369658435605501	0	0	0	0	0	0	0	0	-0.00369658435605501	0	0	0	0	0	0	0	0	0	0	0
55	0	0.0819231630270941	0	-0.0139324277255312	0	0	0	0	0	-0.00696621386276559	0	0	0	0	0	0	0	0	0	0	0.0145942790426153	-0.00696621386276559	-0.0169275336857922	0	0.00762806517984971	0	0	0	0	0.0013237026341683	0	0	0	0	-0.0265411528168941	0	0	0	0	-0.02587930149981	0	0	0.0006618513170841	0	0	0	0	0	-0.0544060082679564
56	0	0	0	0	0	0	0	0	0	0	0	0	0	0	0	0	0	0	0	0	0	0	0	0	0	0	0	0	0	0	0	0	0	0	0	0	0	0	0	0	0	0	0	0	0	0	0	0	0
57	0.0112407126967344	0.00125761717377618	0	0	0	0	0	0.0139133661070402	-0.00267265341030575	0	0	0.0421327783138785	0	0	0	0.0758549164040817	-0.00267265341030575	0	0	0	-0.00267265341030575	0.0116333926894924	-0.00267265341030575	0	0	0	-0.00338017152857054	0	0.00393027058408194	0	0	0	0	0	0.00927557740469344	0	0.019808771983163	0.0205162901014279	0	0.0244465606855097	0	0.00463778870234672	0.00660292399438769	0	0.0602912531305074	0	0.00196513529204097	0	0
58	0	0	0	0	0	0	0	0	0	0	0	0	0	0	0	0	0	0	0	0	0	0	0	0	0	0	0	0	0	0	0	0	0	0	0	0	0	0	0	0	0	0	0	0	0	0	0	0	0
59	0	0	0	0	0	0	0	0	-0.00509502216334641	0	0	0	0	0	0	0	0	0	0	0	0	0	0	0	0	0	0	0	0	0	0	0	0	-0.0101900443266928	0	0	0	-0.00254751108167321	0	0	0	0	0	0	0	0	-0.00254751108167321	0	0
60	0	0	0	-0.00214982102739947	-0.00537455256849867	0	0	0	0	0	0	0.00232007795461928	0	0	0	0.00232007795461928	-0.0032247315410992	0	0	0	0	0	0	0	0	0	0	0	0	0	0	0	0	0.00124516744091955	0	0.00017025692721981	0	0	0	-0.00107491051369973	0	0	0	0	-0.00107491051369973	0	0.00232007795461928	0	0
61	0	0	0	0	0	0	0	0	0	0	0	0	0	0	0	0	0	0	0	0	0	0	0	0	0	0	0	-0.0195160031225605	0	0	0	0	0	-0.00975800156128025	0	0	0.0514668039114771	0.0171556013038257	-0.00975800156128025	0.693159615794889	-0.0023604018187348	0	-0.00975800156128025	0.0171556013038257	-0.00975800156128025	0	0	0	0
62	0.0408830744071954	0.0817661488143908	0.076406448655112	0	-0.0115606936416185	1.92371643688646	0.163532297628782	0.0817661488143908	1.48892848534117	-0.0578034682080925	0.0879671422967305	-0.0115606936416185	0	-0.0346820809248555	1.13254150931803	-0.023121387283237	0	0	0.0470840678895353	0	-0.560584935177874	-0.0346820809248555	0	0	0.122649223221586	-0.178770104783556	0	0	-0.023121387283237	-0.26873177394732	0.245298446443173	0	-0.0115606936416185	-0.0516024747257526	0	0	0.0702054551727723	0	0	-0.0053597001592786	0	0	-0.362058616403329	-0.023121387283237	0	0	0	0.153654190633286	0.111088529579967
63	0	0	-0.0214477211796247	0	0	0	0	0	0	0	0	0	0	0	0	0	0	0	0	0	0	0	0	0	0	0	0	0	0	0	0	0	0	0	0	0	-0.0214477211796247	0	0	0	0	0	0	0	0	0	0	0	0
64	0	0	0	0	0	0	0	0	0.0028246193825382	0	0	0	0	0	0	0	0	0	0	0	0	0	0	0	0	0	0	0	0	0	0	0	0	0	0	0	0	0	0	0	0	0	0	0	0	0	-0.000841149009547041	0	0
65	0	0	0	0	0	-0.0272430076280421	0	-0.0181620050853614	0	0	0	0	0	0	0	0	0	0	0	0	0	0	0	0	0	0	0	0	0	0	-0.023285043982048	0	-0.00908100254268071	-0.0181620050853614	-0.00908100254268071	0	0	0	0	0.0019789818229971	-0.00908100254268071	0.0825429294564316	0	0.0201409869083585	0.0422609556397141	-0.00908100254268071	0	0	0.0201409869083585
66	0.0318244603396177	0.00324024618605981	0	0	0	0	0.0085034976955512	0	0	0.00471586889884461	0	0.00943173779768922	0	0	0.0377269511907569	0	0	0.00324024618605981	0	0	0.0235793444942231	0	-0.00237324390458918	0.0350647065256775	0	0	-0.0014756227127848	0.0111963612709642	0	-0.00295124542556959	0.0901488916886945	0.00648049237211963	-0.0014756227127848	0	0	0	0	0	0	0	0	0	0	0	0	0	0	0	0
67	0	0	0	0	0	0	0	0	0	0	0	0	0	0	0	0	0	0	0	0	0	0	0	0	0	0	0	0	0	0	0	0	0	0	0	0	0	0	0	0	0	0	0	0	0	0	0	0	0
68	0	0	0	0	0	0	0	0	0	0	0	0	0	0	0	0	0	0	0	0	0	0	0	0	0	0	0	0	0	0	0	0	0	0	0	0	0	0	0	0	0	0	0	0	0	0	0	0	0
69	0	0	0	0	0	0	-0.0051495957567331	0	0	0	0	0	0	0	0	0	0	0	0	0	0	0	0	0	0	0	0	0	0	0	0	0	0	0.00957120980091884	0	0	0	0	0	0	-0.0051495957567331	0	0	0	-0.0051495957567331	0	0	0	0
70	0	0	0	0	0	0	0	0	0	0	0	0	0	0	0	0	0	0	0	0	0	0	0	0	0	0	0	0	0	0	0	0	0	0	0	0	0	0	0	0	0	0	0	0	0	0	0	0	0
71	0	0	0	0	0	0	0	0	0	0	0	0	0	0	0	0	0	0	0	0	0	0	0	0	0	0	0	0	0	0	0	0	0	0	0	0	0	0	0	0	0	0	0	0	0	0	0	0	0
72	0.0121158484764387	-0.0138247462431355	-0.00118464643335666	-0.0117190307383326	-0.0143519009669564	-0.0462186312437947	-0.0172483485574907	-0.0126400998097788	-0.0354206695769083	0.0057957985715493	-0.0154062104145982	0.00052715472382092	0.004477911761997	-0.0055293178191581	-0.0339724457816412	0.0188327161194342	0.0110615390287969	-0.0239652162004862	-0.0277827328624666	-0.0173786855432055	-0.0089529201335132	-0.0111918760145117	0.0231773875052355	-0.00289644759053425	-0.00487182610962229	-0.0119826081002431	-0.0146154783288668	-0.0427950289294396	-0.0117190307383326	-0.0337088684197307	0.000133240376195699	0	-0.0351570922149978	-0.016590856847955	-0.0177755032813116	-0.00632004990488945	0.0110615390287969	-0.0171180115717758	-0.00803185106206695	-0.0102708069430655	0	0.00592613555726415	0.008955823523994	0.00395075703817609	-0.00171180115717758	-0.00684720462871033	-0.00171180115717758	-0.00632004990488945	0
73	0	0	0	0	0	0	0	0	0	0	0	0	0	0	0	0	0	0	0	0	0	0	0	0.0248699034415156	0	0	-0.000871778777417443	0	0	0	0	0	0	0	0	0	0	0	0	0	0	0	0	0	0	0	0	0	0
74	0	0	0	0	0	0	0	0.0165343915343915	0	0	0	0.0165343915343915	0	0	0	0.0496031746031746	0	0.0661375661375661	0	0	0	0	0	0	0	0	0	0.0232513866423154	0	0	0	0	-0.0490869821323385	0	0	0	0	0	0	0	0.0165343915343915	-0.0098173964264677	0	0	0	0	-0.0098173964264677	-0.0589043785588062	0
75	0.0167476134650812	0	-0.00718132854578097	0	0	-0.00718132854578097	0	0	0	0	-0.00718132854578097	0	0	-0.0215439856373429	0	0	0	0	0	0	0	-0.00718132854578097	0	0	0	-0.00718132854578097	0.0167476134650812	0	0	0	0	0	0	0	0	0	0	0	0	0	0	0.0167476134650812	0	0	0	0	0	0	0
76	0	0	0	0	0	0	0	0	0	0	0	0	0	0	0	0	0	0	-0.0278836323078353	0	0	0	0	0	0	0	0	0	0	0	0	-0.00929454410261177	0	0	0	0	0	0	0	0	0	0	0	0	0	0	0	0	0
77	0	0	0	0	0	0	0	0	0	0	0	0	0	0	0	0	0	0	0	0	0	0	0	0	0	0	0	0	0	0	0	0	0	0	0	0	0	0	0	0	0	0	0	0	0	0	0	0	0
78	0	0	0	0	0	0	0.0666666666666667	0	0.110926365795725	0	0	0	0	-1.39604117181314	0.0666666666666667	0	0	-0.126603325415677	0	0	-0.0817893903404593	0	0	-0.0593824228028504	0	-0.118764845605701	0	0	0	0	-0.0296912114014252	0	0	0	0.184877276326207	0.0666666666666667	0	0.0666666666666667	0	0	0.266666666666667	-0.0593824228028504	0.266666666666667	0	0.266666666666667	0	2.47680126682502	0.333333333333333	0
79	0	0	0	0	0	-0.00731850117096019	0.0185873605947955	0	0	0	0	0	0	0.0005822153347902	0	-0.0033681429180851	0	0	0	0	0	0	0	0	0.0112688594238353	0	0	0.0185873605947955	0	-0.0219555035128806	-0.00731850117096019	0	0.0112688594238353	0.0681953718778019	-0.0146370023419204	0	0	0	0	0	0	0	0	0	0.0079007165057503	0.0557620817843866	0	0	0
80	0	0	0	0	0	0	0	0	0	0	0	0	0	0	0	0	0	0	0	-0.00315985717445571	0	0	0	0	0	0	-0.00631971434891143	0.0249646334359657	0	0	-0.00315985717445571	0	0	0.00832154447865524	0	0	0	0.0166430889573105	0	0.00200183012974381	0	0	0	0	0	0	0	0	0
81	0	0	0	0	0	0	0	0	0	0	0	-0.00223828815721736	0	0	0	0	0	0	0	0	0.0186046511627907	0	0	0	0.0062015503875969	0	0	0.0124031007751938	0	0	0	0.0186046511627907	-0.00447657631443472	0	0	0	0.0175780229946803	0	0.0193029970678425	0	0.00396326223037954	0	0	-0.00051331408405518	0	0.0248062015503876	0	0	0
82	0	-0.0252908447142135	0	0	0	0	0.29940119760479	0	0	0.0998003992015968	0	0	0	-0.0252908447142135	0	0	-0.0252908447142135	0	-0.0505816894284269	0	0	0	0	0	0	0	0	0	0	0	-0.0252908447142135	0	0	0	0	0	0	0	0	0	0	0.0998003992015968	0	0	0	-0.0252908447142135	0	0	0
83	0	0	0	0	0	0	0	0	0	0	0	0	0	0	0	0	0	0	0	0	0	0	0	0	0	0	-0.0139742873113471	0	0	0	0	0	0	0	0	0	0	0	0	0	0	0	0	0	0	-0.0139742873113471	0	0	0
84	0	0	0	0	0	0	0	0	0	0	0	0	0	0	0	0	0	0	0	0	-0.0091441111923921	0	0	0	0	0	0	0	0	0	0	0	0	0	0	0	-0.0091441111923921	0	0	0.0212449543233482	0	0	0	0	0	0	-0.0091441111923921	0	0
85	0	0.0377369300570853	0	0	0	0	0	0	0	0	0	0	-0.0462909385487791	0	0	0	0	0	0	0	0	-0.0115727346371948	0	0	0	-0.0231454692743895	0	0	0	0	0.167048544083787	0	0	0	-0.0115727346371948	0	0	0	0.0130820977099452	0	-0.0231454692743895	0	0	0	0	0	0	-0.0347182039115843	0
86	0	0	0	0	0	0	0	0	0	0	0	0	0	0	0	0	0	0	0	0	0	0	0	0	0	0	0	0	0	0	0	0	0	0	0	0	0	0	0	0	0	0	0	0	0	0	0	0	0
87	0	0	0	0	0	0	0	0	0	0	-0.0185816042118303	0	0	0	0	0	0	0	0	0	0	0	0	0	0	0	0	0	0	0	0	0	0	0	0	0	0	0	0	0	0	0	0	0	0	0	0	0	0
88	0	0	0	-0.0133725595078898	-0.0267451190157796	0	-0.0133725595078898	0	-0.0133725595078898	0	-0.0267451190157796	0	0.0143740117866897	0	0	0	0	0	0	0	0	0	0	0	0	0	0	0	0	0	0	0	0	0	0	0	-0.0133725595078898	0.043122035360069	0	0	0	0	0	0	0	0	-0.0133725595078898	0	0
89	0	0	0	0	0	0	0	0	-0.00461105731544243	0	0	0	0	0	0	0	0	0	0	0	0	0	0	0	0	0	0	0	0	0	0	0	0	0	0	0	0	0	0	0	0	0	0	0	0	0	0	0	0
90	0	0	0	0	0	0	0	0	0	0	0	0	0	0	0	0	0	0	0	0	0	0	0	0	0	0	0	0	0	0	0	0	0.106723585912487	0	0	0	0	0	0	0	0	0	0	0	0	0	0	0	0
91	0	0	0	0	0	0	0	0	0	0	0	0	0	0	0	0	-0.0572573718866304	0	0	0	0	0	0	0	0	0	0	0	0	0	0	0	0	0	0	0	0	0	0	0	0	-0.0286286859433152	0	0	0	0	0	0	0.159489633173844
92	-0.0144618388228063	0	0	0	0	0	0	0	0	0	0	0	0	0	0	0	0	0	0	0	0	0.00756315232188776	0	0	0	0	0	0	0	0.00756315232188776	0	0	0	0	0	0	0	0	0	-0.00361545970570158	0	0.0226894569656633	0	0	0.00756315232188776	0	-0.0108463791171047	0	0
93	0	0	0	0	0	0	0	0	0	0	0	0	0	0	0	0	0	0	0	0	-0.0135722041259501	0	0	0	0	0	0	0	0	0	0	-0.00678610206297503	0	0	0	0	0	0	0	0	0	0	0	0	0	0	0	0	0
94	0	0	0	0	0	0	0	0	0	0	0	0	0	0	0	0	0	0	0	0	0	0	0	0	0	0	0	0	0	0	0	0	0	0	0	0	0	0	0	0	0	0	0	0	0	0	0	0	0
95	0	0	0	0	0	0	0	0	0	0	0	0	0	0	0	0	0	0	0	0	0	0	0	0	-0.00893734918223255	0	0	0	-0.0268120475466977	0.0489330211881378	0	0	0	0	0	0	0	0	0	0	0	0	0	0	-0.0268120475466977	0	0	0	0
96	0	0	0	0	0	0	0	0	0	0	0	0	0	0	0	0	0	0	0	0	0	0	0	0	0	0	0	0	0	0	0	0	0	0	0	0	0	0	0	0	0	0	0	0	0	0	0	0	0
97	0	0	-0.0146070698217937	0.022456770716371	0	0	0	0.022456770716371	0	0	0	0	0	0	0	0	0	0	0	0	0	0	0	0	0	0	0	0	0	0	-0.0146070698217937	0	0	-0.0146070698217937	0	0	0	0	0	0	0	0	0	0	0	0.022456770716371	0	0	0
98	0	0	0	0	0	0	0	0	0	0	0	0	0	0	0	0	0	0	0	0	0	0	0	0	0	0	0	0	0	0	0	0	0	0	0	0	0	0	0	0	0	0	0	0	0	0	0	0	0
99	0	0	0	0	0	0	0	0	0	0	0	0	0	0	0	0	0	0	0	0	0	0	0	0	0	0	0	0	0	0	0	0	0	0	0	0	0	0	0	0	0	0	0	0	0	0	0	0	0
100	0	0	0	0	0	0	0	0	0	0	0	0	0	0	0	0	0	0	0	0	0	0	0	0	0	0	0	0	0	0	0	0	0	0	0.006564695069914	0	0	0	0	0	-0.00332115576220525	0	0	0	0	0	0	0	0
101	-0.954907161803713	0.993134654392263	-0.077235138087065	-0.489545951006397	0.605008581682007	-0.354579497581526	-0.02418474020908	0.163832111093774	-0.26525198938992	-0.077235138087065	-0.171243563738492	-0.106100795755968	0.429084100483695	-0.02418474020908	-0.106100795755968	-0.159151193633952	-0.26525198938992	0.482134498361679	0.147058823529412	0.122874083320331	-0.159151193633952	-0.26525198938992	-0.171243563738492	0.576142924013107	0.147058823529412	-0.424403183023873	-0.212201591511936	0.36394133250117	0.441176470588235	0.134966453424872	-0.118193165860508	-0.424403183023873	-0.106100795755968	-0.183335933843033	-0.371352785145889	-0.106100795755968	-0.065142767982524	0	-0.077235138087065	0	0.028865657668904	-0.106100795755968	-0.248478701825558	-0.0530503978779841	-0.01209237010454	0.923310968949912	0.388126072710251	-0.183335933843033	0.768840692775785
102	0	0	0	0	0	0	0	0	0	0	0	0	0	0	0	0	0	0	0	0	0	0	0	0	0	0	0	0	0	0	0	0	0	0	0	0	0	0	0	0	0	0	0	0	0	0	0	0	0
103	0	0	0	0	0	0	0	0	0	0	0	0	0	0	0	0.0133405756443468	0	0	0	0	0	0	0	0	0	-0.0118483412322275	0	0	0	0	0	0	0	0	0	-0.0473933649289099	0	0	0	0	0	0	0	0	0	0	0	0	0
104	0	0	0	0	0	0	0	0	0	0	0	0	0	0	0	0	0	0	0	0	0	0	0	0	0	0	0	0	0	0	0	0	0	0.0094392784448616	0	0	0	0	0	0.207379970650326	0	0	0	0	0.075407669382657	0	0	0	0
105	0	0	0	0	0	0	0	0	0	0	0	0	0	0	0	0	0	0	0	0	0	0	0	0	0	0	-0.002389486260454	0	0	0	0	0	-0.002389486260454	0	0	0	0	0	0	0	0	0	0	0	0	0	-0.002389486260454	0	0
106	0	0	0	0	0	0	0	0	0	0	-0.0994530084535057	0	0	0	0	0	0	0	0	0	0	0	0	0	0	0	-0.0497265042267529	0	0	0	0	0	0	0	0	0	0	0	0	0	0	0	0	0	0	0	0	0	0
107	0	0	0	0	0	0	0	0	0	0	0	0	0	0	0	0	0	0	0	0	0	0	0	0	0	0	0	0	0	0	0	0	0	0	0	0	0	0	0	0	0	0	0	0	0	0	0	0	0
108	0.259265837501251	0.035486160397445	0.0641440517610901	0	0.05355595396548	0	0.0163461685244905	0.0236574402649633	0.132322549207516	0.0013448152284453	0.0118287201324817	0.0268300734285269	-0.00682826903379993	-0.151017500124991	0	0.0768345844153439	-0.0136565380675999	0	0.053451761073907	-0.00548345380535459	0.0978023942234172	0	0	0.0236574402649633	-0.00682826903379993	0	0	0.0523153316286084	0	0	0	-0.00682826903379993	0.0118287201324817	-0.0136565380675999	0	0	-0.409904527811142	-0.0204848071013998	0.0118287201324817	0	0	-0.121564027379953	0.0500045109868177	-0.0377969810392361	0	0	0	-0.213987160689589	-0.00682826903379993
109	0	0	-0.0133725595078898	0	0	0	-0.0133725595078898	-0.0267451190157796	0	-0.0133725595078898	0	-0.0133725595078898	0	-0.0267451190157796	0	0.0143802128271498	0	0	0	0	0	0	0	0	0	0	0	0	0	0	0	0	0	0	0	0	0	0	0	-0.0133725595078898	0.0431406384814495	0	0	0	0	0	0	0	0
110	0	0	0	0	0	0	0	0	0	0	0	0	0	0	0	0	0	0	0	0	0	0	0	0	0	0	0	0	0	0	0	0	0	0	0	0	0	0	0	0	0	0	0	0	0	0	0	0	0
111	0	0	0	0	0	0	0	0	0	0	0	0	0	0	0	0	0	0	0	0	0	0	0	0	0	0	0	0	0	0	0	0	0	0	0	0	0	0	0	0	0	0	0	0	0	0	0	0	0
112	0	0	0.157150340492404	0	0	0	-0.0181587071000545	0	0	-0.0181587071000545	0	0	0	0	0	-0.0181587071000545	0.104766893661603	-0.0181587071000545	0	0	-0.0181587071000545	0	0	0	0	0	0	0	0.034224739730747	0	0	-0.0363174142001089	0	0	0	0	0	0	0	0	0.034224739730747	0	0	0	0	0	0	0	0
113	-0.092862663680318	0	-0.419818976103566	0	-0.0124870005434854	-0.228639988867012	0	-0.0124870005434854	0	0	-0.0678886625933469	-0.271554650373388	-0.092862663680318	0.362837633262059	-0.339443312966735	0.0429146615063761	0.03042766096289	-0.203665987780041	-0.0124870005434854	-0.203665987780041	-0.532201980994935	-0.0678886625933469	0	-2.07024690034659	-0.364417314053705	-0.007033340667566	0	-0.037461001630457	-1.00196895927245	0.03042766096289	-0.0678886625933469	0	-1.73625724725578	-0.135777325186694	0.166204986149584	0	-0.203665987780041	-0.0678886625933469	-0.117836664767289	0	-0.14826432573018	-0.543109300746775	-1.09870560203704	-0.135777325186694	-0.419818976103566	0.0429146615063761	-0.271554650373388	0.38781163434903	-0.0803756631368325
114	0	0	0	0	0	0	0	0	0	0	0	0	0	0	0	0	0	0	0	-0.00118298395873752	0	0	0	0	0	0	0	0	0	0	0	0	0	0	0	0	0	0	0	0	0	0	0	0	0	0	0	0	0
115	0	0	0	0	0	0	0	0	0	0	0	0	0	0	0	0	0	0	0	0	0	0	0	0	0	0	0	0	0	0	0	0	0	0	0	0	0	0	0	0	0	0	0	0	0	0	0	0	0
116	0	0	0	0	0	0	0	0	0	0	0	0	0	0	0	0	0	0	0	0	0	0	0	0	0	0	0	0	0	0	0	0	0	0	0	0	0	0	0	0	0	0	0	0	0	0	0	0	0
117	0	0	0	0	0	0	0	0	-0.00428100518001627	0	-0.00428100518001627	-0.00856201036003254	-0.00428100518001627	0	0	0	0	0.0112069931637342	0	0	0	-0.00428100518001627	0.0224139863274683	0	0	0	0.00264498280370166	0.0224139863274683	0	0	0	0	-0.00428100518001627	0	0	-0.0128430155400488	0.00264498280370166	0.0224139863274683	0	0	0	-0.00856201036003254	0	0	0	0	0	0	0
118	-0.0274763016897926	0	-0.0412144525346888	0	-0.0274763016897926	0	0	0	0	0	0	0	-0.0274763016897926	0	0	0	0	-0.0137381508448963	0	-0.0137381508448963	0	0	0	0.0247826503877693	0	0	0	-0.0274763016897926	0	0	0	0	0	0.0770416024653313	0	0	0	0.0385208012326656	0	0	0	-0.0274763016897926	0	0	0	0	0	0	0
119	0	0	0	0	0	0	0	0	0	0.143905790676303	0.0250878073256397	0	-0.0189322226429383	0	0	0	0.0373989766910426	0	-0.0127766379602369	0	0	0	0	0	0	0	0	0	0	0	0	0	0	0	0	0	0	0.0563311993339809	0	0	0	0	0.0250878073256397	0	0	0	0	0	0
120	0	0	0	0.01933114247052	0	0	0	0.05799342741156	0	0	0	0.03866228494104	0	0	0	0.242514741670402	0	0	0	-0.00834794223223975	0	0.03866228494104	0	0.01933114247052	0	0	-0.00834794223223975	0	0	0	0	0.024601658482601	0	0	-0.045259305595476	0	0	0	0	-0.00834794223223975	0	0	-0.0166958844644795	0	0	0	0	0	0
121	0	0	-0.0194024058983314	0	0	0	0	0	0	0	0	0	0	0	0	0	0	0	0	0	0	0	0	0	0	0	0	-0.0194024058983314	0	-0.0097012029491657	0	0	0	0	0.0194439043359907	0	0	0	0.0194439043359907	0	0	0	0	0	0	0	0	-0.0097012029491657	0
122	0	0	0	0	0	0	0	0	0	0	0	0	0	0	0	0	0	0	0	0	0	0	0	0	0	0	0	0	0	0	0	0	0	0	0	0	0	0	0	0	0	0	0	0	0	0	0	-0.00114399460034549	0
123	0	0	0	0	0	0	0	0	0	0	0	0	0	0	0	0	0	0	0	0	0	0	0	0	0	0	0	0	0	0	0	0	0	0	0	0	0	0	0	0	0	0	0	0	0	0	0	0	0
124	0	0	0	0	0	0	0	0	0	0	0	0	0	0	0	0	0	0	0	0	0	0	0	0	0.158982511923688	0	0	0	0	0	0	0	0	0	0	0	0	0	0	0	0	0	0	0	0	0	0	0	0.476947535771065
125	0	0	0	0	0	0	0	0	0	0	0	0	0	0	0	0	0	0	0	0	0	0	0	0	0	0	0	0	0	0	0	0	0	0	0	0	0	0	0	0	0	0	0	0	0	0	0	0	0
126	0.112822474405233	0.0874834433497292	0.0038185605529049	-0.0096893339032947	0.0334732025739331	0.0010154378742409	-0.372258882014521	-0.0284386873007342	-0.0056169138818295	-1.45506424678001	0.06387875447614	0.0634243781615272	0.00025385946856023	-0.055175037993058	0.0140049448688187	0.00165542080789224	0.013243366463138	0.0252174355834748	0.86575089183467	0.0220281894397196	-0.000639982933651331	-0.0726167901886399	-0.0086738960290538	-0.265065789525775	-0.0118524736483074	0.018849611820466	-0.39163086592624	-0.0161894216628344	-0.00955706990676384	-0.47928706225103	-0.0080339130954025	0.00165542080789224	0.0038185605529049	-1.25426089300311	-0.015184652313095	-0.00790164909887168	-0.0228111048944034	-0.0135078944561997	-0.00280312267866403	-0.0084093680359921	-0.431569965566733	-0.0135078944561997	-1.45091251977521	-0.414883493491279	-0.0154171747326522	-0.0112124907146561	-0.045876069257367	-0.00280312267866403	-0.0445961033900642
127	0	0	0	0	0	0	0	0.104329681794471	0	0	0	0	-0.0228154232261008	0	0	0	0	0	0	0	0	0	0	0	0	0	0	0	0	0	0	0	0	0	0	0	0	0	0	0	0	0	0	0	0	0	0	0	0
128	0	0	0	0	0	0	0	0	0	0	0	0	0	0	0	0	0	0	0	0	0	0.0085726532361766	0	0	0	0	0	0	0	0	0	0	0	0	0	0	0	0	0	0	0	0	0	0	0	0	0	0	0
129	0	-0.453219818517104	-0.0904977375565611	0	0	0	0	0	0.0897666068222621	-0.904977375565611	-0.0904977375565611	-0.271493212669683	-0.0904977375565611	0	0.0448833034111311	0	-0.000731130734298993	0	0	0	0	0	0	0	0	0	0	0	0	0	-0.0904977375565611	0	0.0448833034111311	0	0	0	-0.0904977375565611	0	0	0.134649910233393	-0.136112171701991	0	0.0448833034111311	0	-0.180995475113122	-0.317107646815113	-0.180995475113122	-0.04561443414543	-0.633484162895928
130	0	0	0	0	-0.00435293605536935	0.0151171579743008	0	0	0	0	0	0	0	0	0	0	0	-0.00114729312358827	0	0	-0.00870587211073869	0	0	0	0	0	-0.00435293605536935	0	0	0.0226757369614512	0	0	0	0	0	0.00755857898715042	0	0	0	0	0	0	0	-0.00870587211073869	0	0	0	0	0
131	0	0	0	0	0	0	0	0	0	0	0	0	0	0	0	0	0	0	0	0	0	0	0	0	0	0	0	0	0	0	0	0	0	0	0	0	0	0	0	0	0	0	0	0	0	0	0	0	0
132	0	0	0	0	0	0	0	0	0	0	0	0	0	0	0	-0.0038311240517968	0	-0.0019155620258984	0	0	0	0	0	0	0	0	0	0	0	0	-0.0038311240517968	0	0	0	0	0	0	0	0	-0.0019155620258984	0	0	0	0	0	0	0	0	0
133	0	0	0	0	0	0	0	0	0	0	0	0	0	0	0	0	0	0	0	0	0	0	0	0	0	0	0	0	0	0	0	0	0	0	0	0	0	0	0	0	0	0	0	0	0	0	0	0	0
134	0	0	0	0	0	0	0	0	0	0	0	0	0	0	0	0	0	0	0	0	0	0	0	0	0	0	0	0	0	0	0	0	0	0	0	0	0	-0.00969555943377933	0	0	0	0	0	0	0	0	0	0	0
135	0	-0.0944287063267233	0.0263631275129358	0	0	0	0	0	0.0452488687782805	0	0	0	-0.0377714825306893	0.124338251317088	0	-0.0377714825306893	0	0	0	0	0.135746606334842	0	-0.0188857412653447	0	0	-0.0944287063267233	0	0	0	0	0	0	0.0452488687782805	0	0	0	0	0	0	0	-0.0377714825306893	0	-0.0377714825306893	0	-0.0377714825306893	-0.0188857412653447	0	0	0
136	0	0	0	0	0	0	0	0	0	0	0	0	0	0	0	0	0	0	0	0	0	0	0	0	0	0	0	0	0	0	0	0	-0.0540248514316586	0	0	0	0	0	0	0	0	0	0	0	0	0	0	0	0
137	0	0	0	0	0	0	0	0	0	0	0	0	0	0	0	0	0	0	0	0	0	0	0	0	0	0	0	0	0	0	0	0	0	0	0	0	0	0	0	0	0	0	0	0	0	0	0	0	0
138	0	0	0	0	0	0	0	0	0	0	0	0	0	0	0	0	0	0	0	0	0	0	0	0	0	0	0	0	0	0	0	0	0	0	0	0	0	0	0	0	0	0	0	0	0	0	0	0	0
139	0	0	0	0	0	0	0	0	0	0	0	0	0	0	0	0	0	0	0	0	0	0	0	0	0	0	0	0	0	0	0	0	0	0	0	0	0	0	0	0	0	0	0	0	0	0	0	0	0
140	0	0.200601805416249	0	0	0	0	0	0	0	-0.0586510263929619	0	0	0	0	0	0	0	-0.201454804295584	0	0	0	-0.0293255131964809	0	-0.159804927980422	0	0.0416498763151621	0	0	0	0	0	0	0.150451354062187	0	0.22142674357383	0	-0.0964771146283428	0	0	0	-0.0085005750388997	0	0	-0.146627565982405	0	0	-0.817290581421684	0	-0.0879765395894428
141	0	0	0	0	0.0121656704476677	0	0	0	0	0	0	0	0	0	0	0	0	0	0	0	0	0	0	0	0	0	0	0	-0.00390762377398304	0	0	0	0	0	0	0	0	0	0	0	0	0	0	0	0	0	0	0	0
142	0	0	0	0	0	0	0	0	0	0	0	0	0	0	0	0	0	0	0	0	0	0	0	0	0	0	0	0	0	0	0	0	0	0	0	0	0	0	0	0	0.0206611570247934	0	0	0	0	0	0	0	0
143	-0.00235949223727054	0	0	0	0.004985042696735	0	0	-0.00235949223727054	0	-0.00235949223727054	0	-0.00222646312617358	0	0	0.00970402717127608	-0.00235949223727054	0.00013302911109696	0	0	0	-0.00707847671181162	-0.00235949223727054	0	0	0	0	-0.00943796894908216	0	0	0	0	-0.00222646312617358	0	0	0	0	0	0	0	0	0	0	0	-0.00707847671181162	0	0	-0.00471898447454108	0	0
144	0	0	0.0111170121581811	0	0	0	0.00909743577069795	0	-0.00572836111588475	0.0889547813194959	-0.0114567222317695	0	-0.00572836111588475	0.044477390659748	0	0	0	0	-0.0171850833476542	-0.0114567222317695	0	0	-0.00572836111588475	0	0	0	0	0	-0.0114567222317695	0	0	0	0.044477390659748	-0.0114567222317695	0	-0.00572836111588475	0	0	-0.00572836111588475	0	0	-0.0171850833476542	0.00909743577069795	-0.0114567222317695	0	-0.00572836111588475	0	-0.0195443698087258	0
145	0	0	0	0	0	0	0	0.03008876184745	0	0	0	0.123459129806062	0	0	0.0181484633399873	0.112470893613773	0	0	0	0	0	0.135399428313525	0	0	0	-0.0119402985074627	0	0	0	-0.0119402985074627	0.045133142771175	1.30333738259208	-0.0119402985074627	-0.01098823619229	0	0.0093122472487869	0.015044380923725	0.0217285769138362	0	0	0	0	-0.073317779988279	-0.0327168131061257	0	-0.053265192017945	-0.0119402985074627	-0.0327168131061257	0
146	0	0	0	-0.0505050505050505	0.121802679658953	0	0	-0.101010101010101	-0.0505050505050505	0	0	0	0	0	0	-0.0505050505050505	0	0	0	0	-0.101010101010101	0	0	0	0	0	0	0	0	0	0	0	0	0	0	0	0	0	0	0	0	0	0	0	0	0	0	0	0
147	0	0	0	0	0	-0.00235190818150459	0	0	0	0	0	0	0.00973008737618464	0	0	0	0	0	0	0	0	0	0	0	0	0	0	0	0	0	0	0	0.003108065556639	0	0	0	-0.00156793878766973	0	0	-0.00156793878766973	0	0	0	-0.00156793878766973	0	0	0.00700010050711285	0	0
148	0	0	0	0	0	0	0	0	0	-0.0095565749235474	0	-0.0095565749235474	0	0	-0.0191131498470948	0	0	0	0	0	0	0	0	0	-0.0191131498470948	0	0	0	0	0.0360750360750361	0	0	0	-0.0095565749235474	0	0	0	0.018037518037518	0	0	0	0	0	0	0	0	0	0	0
149	0.185015278249604	0	-0.0294464075382803	0.0757002271006813	-0.0588928150765607	-0.147232037691402	0.227100681302044	0	0	0	0	0	-0.0294464075382803	0	0.046253819562401	0	0	0	0	0	0	0	0	0	0	0	0	0	-0.0294464075382803	0	0	0	0	0.0757002271006813	0	0	0	0	0	-0.0588928150765607	0.0757002271006813	0	0.121954046663083	0	0	0	0	0	0
150	0	0	0	0	0	0	0	0	0	0	-0.126143172500788	0	0	-0.0946073793755913	0.0639795265515035	-0.0630715862503942	0	0	0	0	0	0	0	0	0	0	-0.0315357931251971	0	0	0	0	0	0	0	0	0	0	-0.0315357931251971	0	0.0973312002789197	0	0	0	0	0	0	0	0	0
151	0	0	0	0	0	0	-0.00259895522000156	0	0	0	0	0	0	0.010866612333605	0	0	0	0	0	0	0	0	0	0	0	0	0	0	0	0	0	0	0	0	0	0	0	0	0	0	0	0	0	0	0	0	0	0.010866612333605	0
152	0	0	0	0	-0.0256673511293634	0	0	0	0	0	0	0	0	0	0	0	0	0	0	0	0	0	0	0	0	0	0	0	0	0	0	0	0	0	0	0	0	0	0	0	0	0	0	0	0	0	0	0	0
153	0	0	0	0	0	0	0	0.039344262295082	0	0.0131147540983607	0	0	0	0	0	0	0	0	0	0	0	0	0	0	0	0	0	0	-0.0123183050012318	0	-0.05362703403487	0.0039822454856441	0.0131147540983607	0	0	0	0	0.083467219172937	0	-0.0123183050012318	0.27482663500256	-0.049644788549227	17.9511500450325	0.45243316814688	1.60467368608113	-0.027397525838149	0	-0.073909830007391	0
154	0	0.0429922613929493	0	0	0	0	0	0	0	0	0	0	0	0	0	0	0	0	0	0	-0.063626723223754	0	0	0	-0.0212089077412513	0	0	0	0	0	0	0	0	0	0	0	0	0	0	0	0	0	0	0	0	0	0	0	0
155	0	0	0	0	0	0	0	0	0	0	0	0	0	0	0	0	0	0	0	0	0	0	0	0	0	0	0	0	0	0.117439812096301	0	0	0	0	0	0.0587199060481503	0	0.257063176568849	0	0	0	0	0.639396916314586	0.139623364472548	0	0.052197855833083	0.396686541041396	0	-0.109609061015711
156	0	0	0	0	0	0	0	0	0	0	0	-0.0963391136801541	0	0	0	0	-0.0963391136801541	0	0	0	0	0	0	0.309119010819165	0	0	0	0	0	0	0	0	0	0	0	0	0	0	0	0	0	0	0	0	0	0	0	0	0
157	0	0	0	0	0	0	0	0	0	0	0	0	0	0	0	0	0	0	0	0	0	0	0	0	0	0	0	0	0	0	0	0	0	0	0	0	0	0	0	0	0	0	0	0.0054188793757451	0	0	0	0	0
158	0	0	0	0	0	0	0	0	0	0	0	0	0	0	0	0	0	0	0	0	0	0	0	0	0	0	0	0	0	0	0	0	0	0	0	0	0	0	0	0	0	0	0	0	0	0	0	0	0
159	0	0	0	0	0	0	0	0	0	0	0	0	0	0	0	0	0	0	0	0	0	0	0	0	0	0	0	0	0	0	0	0	0	0	0	0	0	0.226244343891403	0	0	0	0	0	0	0	0	0	0	0
160	0	0	0	0	0	0	0	0	0	0	0	0	0	0	0	0	0	0	0	0	0	0	0	0	0	0.0648088139987038	0.129617627997408	0	-0.0510594842992086	0	0	0	0	0	0	0	0	0	0	0	0	0	0	0	0	0	0	0	0
161	0	0	0	0	0	0	0	0	0	0	0	0	0	0	0	0	0	0	0.0616468133205807	0	0	0	0	0	0	0	0	0	0	0	0	0	0	0	0	0	0	0	0	0	0	0	0	0	0	0	0	0	0
162	0	0	-0.0687757909215956	0	0	0	0	0	0.0602409638554217	0	0	0	0	-0.0515818431911967	0	0	0	0	0	0	0	0	0	0	0	0	0	0	0	0	0	0	0	0	0	0	0	0	0	0	0	0	0	0	0	0	0	0	0
163	0	0	0	0	0	0	0	0	0	0	0	-0.0504286434694907	0	-0.0504286434694907	0	0	0	0	0	0	0	0	0	0	0	0	0	0	0	0	0	0	0	0	0	0	-0.0504286434694907	0	0	0	-0.0504286434694907	0	0	0	0	0	0	0	0
164	0	0	0	0	0	0	0	0	0	0	0	0	0	0	0	0	0	-0.0434216239687364	0	0	0	0	0	0	0	0	0	0	0	0	0	0	0	0	0	0.0363231926181855	0	0	0	0	0	0	0	0	0	0.0363231926181855	0	0	0
165	0	-0.042571306939123	0	0	0	0	0	-0.042571306939123	0	0	0	0	0	0.056369785794814	0	0	0	0	0	0	0	0	0	0	0	0	0	0	0	0	0	0	0	0	0	0	0	0	0	0	0	0	0	0	0	0	0	0	0
166	0	0	0	0	0	0	0	0	-0.056980056980057	0	0	-0.013969304291885	0	0	0	0	0	0	0	0	-0.0142450142450142	0	0	0	0	0.157797996507674	0	0	0	0	-0.0564286370737979	0	0	0	0	0	0	0	0	0	0	0	0	0	0	0	0	0	0
167	0	0	0	0	0	0	0	0	0	-0.0106923282544774	0	0	-0.0106923282544774	0	0	0	0	0	0	0	0	0	0	0	0	0	0	0	0	0	0	0	0	0	0	0	-0.0106923282544774	0	-0.00534616412723871	0	-0.0106923282544774	0	0	0	0	0	0	0	0
168	0	0	-0.0621195179525407	-0.0248478071810163	0	0	0	0	0	0	0	0.113895216400911	0	0	0	0	0	0	0	-0.0124239035905081	0	0	0.0284738041002278	0.142369020501139	0	0	0	0	0	0	0	-0.0124239035905081	0	0	-0.0672914277046254	-0.0124239035905081	0	0	0	0	-0.0124239035905081	0	0	-0.0124239035905081	0	0.0036259969192115	0	-0.086967325133557	0
169	0	0	0	0	0	0	0	0	0	0	0	0	0	0	0	0	0	0	0	0	0	0	0	0	0	0	0	0	0	0	0	0	0	0	0	0	0	0	0	0	0	0	0	-0.174114915844457	0	0	0.099403578528827	0	0
170	0	0	0	0	0	0	0	0	0	0	0	0	0	0	0	0	0	-0.00921718067519256	0	0	0	0	0	0	0	0	0	-0.00433764205777739	0	0	0	0.0200625206099737	0	0	0	0	0	0	0	0	0	-0.00867528411555478	0	0	0	0	0	0	0
171	0	0	0	0	0	0	0.0262797405093461	0	0.0421100397020009	0	-0.0424223141372362	0	0	0	0	0	0	0	0	0	0	0	0	0	0	0	0	0	0	0	0.0316605983853095	0	0.0316605983853095	0.0158302991926547	0	0	0	0.0316605983853095	0	0	0	0	0	0	0	0	0.0683897802113468	0	0
172	0	0	0	0	0	0	0	0	0	0	0	-0.00797893560998963	0	0	0	0	0	-0.00797893560998963	0	0	0	-0.00797893560998963	0.0170648464163823	0	0	0	0	0	0	0	0	0	0	0	0	0	0	0	0	0	0	0	0	0	0	0	0	0	0
173	0	0	0	0	0	0	0	0	0	0	0	0	0	0	0	0	0	0	0	0	0	0	0	0	0	0	0	0	0	0	0	0	0	0	0	0	0	0	0	0	0	0	0	0	0	0	0	0	0
174	0	0	0	0	0	0	0	0	0	0	0	0	-0.0961538461538462	0	0	0	0	0	0	-0.0961538461538462	0	0	0	0	0	0	0	0	0.18018018018018	-0.0961538461538462	0	-0.0961538461538462	0	-0.288461538461538	-0.0961538461538462	0	0	0.071898821898822	-1.25	-0.204435204435205	-0.192307692307692	0	0.504158004158003	0	-0.0961538461538462	-0.288461538461538	0	0	0
175	0	0	0	0	0	0	0	0	0	0	0	0	0	0	0	0	0	0	0	0	0	0	0	0	0	0	0	0	0	0	0	0	0	0.159094716582707	0	0	0	0	0	0	0	0	0	0	0	0	0	0	0
176	0	0	0	0	0	0	0	0	0	0	0	0	0.00820546483958316	0	0	0	-0.00419137833476539	0	0	0	0	0	0	0	0	0	0	0	0	0	0	0.0038367946748701	0	0	-0.00209568916738269	0	0	0.0183293270166014	0	0	-0.00209568916738269	0	0	0	-0.00419137833476539	0	0	0	0
177	0	0	0	0	0	0	0	0	0	0	0	0	0	0	0	0	0	0	0	0	0	0	0	0	0	0	0	0	0	0	0	0	0	0	0	0	0	0	0	0	0	0	0	0	0	0	0	0	0
178	0	0	0	0.0153633430634506	0	0.0153633430634506	0	0	0	0	0	0	0	0	0	0	0	0	0	0	0.0153633430634506	0	0	0	0	0	0	0	0	0	0	0	0	0	0	0	0	0.0307266861269012	0	0	0	0	0	0	0	0	0	0	0
179	-0.343053173241852	0	0	0	0	0	0	-0.171526586620926	0	0	0	0.078280589867269	0	0	0	0	0	0	0	0	-0.0857632933104631	0	0	0	0	0	-0.171526586620926	0	0	0	0	0	0	0.335570469798658	0	0	0	0	-0.0857632933104631	0.167785234899329	0.078280589867269	2.22955782978576	2.25920084727227	-0.261031231652987	0	-0.171526586620926	0.581636294565255	-0.0857632933104631	-0.257289879931389
180	-0.029057738182172	-0.152439024390244	0.0998003992015968	0	0	0	-0.152439024390244	0	0	0	0	0	0	0	-0.152439024390244	0	0	0	0	0	0	0	0	0	0	0	0	-0.0762195121951219	0	0	0	0	0.0998003992015968	0	-0.0762195121951219	-0.533536585365854	-0.0762195121951219	0	0	-0.228658536585366	0	0	0	0	0	0.317505233435568	0	0	0
181	0	0	0	0	0	0	0	0	0	0	0	0	0	0	0	0	0	-0.0255036980362153	0	0	0	0	0	0	0	0	0	0	0	0	0	0	0	0	0	0	0	0	0	0	0	0	0	0	-0.0255036980362153	0	0	0	0
182	0	0	0	0	0	0	0	0	0	0	0.0270709258256632	0	0	0	0	0	0	0	0	0	0	0	0	0	0	0	0	-0.0171320884015762	0	0	0.0270709258256632	0	0	0	0	0	-0.0171320884015762	0	0	0	0	0	0	0	-0.0171320884015762	0	0	0	0
183	0.0278215223097113	0	-0.12	0	-0.017007874015748	-0.106666666666667	0.047139107611549	-0.181837270341207	0.094488188976378	-0.075170603674541	0.042309711286089	-0.0266666666666667	-0.088503937007874	-0.08	0.0363254593175853	-0.133333333333333	-0.0303412073490813	-0.0133333333333333	-0.075170603674541	0.0811548556430447	-0.0351706036745407	-0.0533333333333333	0.162309711286089	0.031496062992126	0	0.104146981627297	-0.078845144356955	-0.266666666666667	-0.064356955380577	-0.453333333333333	-0.817427821522306	-0.733333333333333	-0.385511811023622	-0.582047244094488	-0.922729658792654	-0.492178477690289	-0.0933333333333333	-0.114015748031496	-0.12	0.07748031496063	0	-0.0533333333333333	-0.04	-0.0266666666666667	0.062992125984252	-0.04	0.031496062992126	-0.0533333333333333	-0.0618372703412073
184	0	0	0	0	0	0	0	0	0	0	0	0	0	0	0	0	0	0	0.0542901108551415	0	0	0	0	0.205338809034908	0.211249626227736	0	0	0	0.308008213552361	0	0	0	0.072022562433627	0.102669404517454	0	0	-0.0725689404934688	0	0	0	-0.0241896468311563	0.513347022587269	0	0	-0.120948234155781	-0.0967585873246251	0	0	0
185	0	0	0	0	0	0	0	0	0	0	0	0	0	0	0	0	0	0	0	0	0	0	0	0	0	0	0	0	0	0	0	0	0	0	0	0	0	0	0	0	0	0	0	0	0	0	0	0	0
186	-0.0209511837418814	0	0	0	0	0	0	0	0	0	0	0.105932203389831	0	0	0	0	0	0	0	0	0	0	0.105932203389831	0	0	0	0	0	0	-0.0209511837418814	0.149010855554017	0	0	0.0221274684223053	0	0	0	0	0.235168159882389	0.0849810196479496	0	0.0320149179530339	-0.167609469935051	0	-0.0209511837418814	0	-0.0209511837418814	0	0
187	0	0	0	0	0	0	0	0	0	-0.130293159609121	0	-1.3567282760148	0	0	0	0.84985835694051	0	0	0	-0.195439739413681	0	-0.0651465798045603	0.141643059490085	-0.130293159609121	0.424929178470255	0	-0.130293159609121	0	0	-0.0651465798045603	0	0	0	0	0	0	0	0	0	0	0	0	0	0	0	0	0	0	0
188	0	0.125	-0.0683526999316473	0	-0.0683526999316473	0	0	0	0	0	0	0	-0.0683526999316473	0	0	0	0	0	-0.0683526999316473	0	0	0	0	0	0	0	0	0	0	0	0	0	-0.136705399863295	0	0	0	0	0	0	0	0	0	0	0	0	0	0	0	-0.205058099794942
189	0.380228136882129	0	0	0.760456273764261	0	2.20532319391635	0	0	-0.0760456273764259	1.14068441064639	0	0	-0.0760456273764259	0	0	-0.0760456273764259	0.380228136882129	1.44486692015209	-0.53231939163498	0	-0.152091254752852	0	0.228136882129278	0	0	0	0	0	1.14068441064639	0	0	-0.0760456273764259	0	0	0	0.380228136882129	0	0	0	0	-0.0760456273764259	0	0	0	0	0.380228136882129	0	-0.0760456273764259	0
190	0	0.0296766896138951	0	0	0	-0.01743679163034	0	0.0383950854290651	-0.0610287707061901	0	0.0436773386816427	0.0104791468993625	-0.04359197907585	0	0	0	-0.071251838788174	-0.00871839581517001	0	-0.00871839581517001	0	0	-0.0034361425625925	0	-0.00871839581517001	0.0191975427145325	0	0	0	0	0.0191975427145325	0	0	0	-0.0243944363613175	0	-0.00871839581517001	0	0	0	0	0	0	0.0401558365132576	0	-0.00871839581517001	0.0191975427145325	0	0
191	-0.0662427986455119	-0.0412541254125413	0.0487963565387118	-0.0247524752475248	-0.100427088902774	-0.0577557755775578	-0.000472395970891798	-0.0825082508250825	-0.041962719368879	0.024280079276633	0.0322947063736953	-0.0084870230679542	0.0325309043591412	-0.000236197985445899	0	-0.0169740461359083	0	-0.00825082508250825	-0.000472395970891798	-0.0577557755775578	-0.033003300330033	-0.0252248712184166	-0.0084870230679542	-0.0165016501650165	0.0645894127473906	-0.0495049504950495	-0.0167378481504624	-0.0412541254125413	-0.0084870230679542	0	0.0162654521795706	-0.00825082508250825	0	-0.00825082508250825	-0.0165016501650165	-0.00825082508250825	0	0	0	0	-0.0247524752475248	0	0	0	0	0	0.0162654521795706	0.0325309043591412	0
192	0	0	0	0	0	0	0	0	0	0	0	0	0	-0.0280112044817927	0	0	0	0	0	-0.0560224089635854	0	0	0	0	0	0	0	0.0614628149969269	0	0	0	0	0	0	0	0	0	0	0	0	0	0	0	0	0	0	-0.0280112044817927	0	0
193	0	0	0	0	0	-0.0214592274678112	0	0	0	0	0	0	0	0	0	0	0	0	0	0	0	0	0	0	0	0	0	0	0	0	0	0	0	0	0	0	0	-0.0214592274678112	0	0	-0.0503129311856318	0	0	0	0	0.0355239786856128	0	-0.0214592274678112	0
194	0	0	0	0	0	0	0	0	0	0	0	0	0	0	0	0	0	0	0	0	0	0	0	0	0	0	0	0	0	0	0	0	0	0	0	0	0	0	0	0	0	0	-0.0152183838076396	0	0	0	0	0	0
195	0	0	0	0	0	0	0	0	0	0	0	0	0	0	0	0	0	0	0	0	0	0	0	0	0	0	0	0	0	0	0	0	0	0	0	0	0	0	0	0	0	0	0	0	0	0	0	0	0
196	0	0	0	0	0	0	0	0	0	0	0	0	0	0	0	0	0	0	0	0	0	0	0	0	0	0	0	0	0	0	0	0	0	0	0	0	0	0	0	0	0	0	0	0	0	0	0	0	0
197	0	0	0	0	0	0	0	0	0	0	0	0	0	0	0	0	0	0	0	0	0	0	0	0	0	0	0	0	-0.13271400132714	0	0	0	0	0	0	0	0.154320987654321	0	0	0.087963986990751	0	0	0	0	0	0.308641975308642	0.154320987654321	0	0
198	0	0	0	0	0	0	0	0	0	0	0	0	0	0	0	0	0	0	0	0	0	0	0	0	0	0	0	0	0	0	0	0	0	0	0	0	0	0	0	0	0	0	0	0	0	0	0	0	-0.00483418737310258
199	0	0	0	0	-0.00705218617771509	0	0	0	0	0	0	0	0	0	0	0	0	0	0	0	0	0	0	0	0	0	0	0	0	0	0	0	0	0	0	0	0	0	0	0	0	0	0	0	0	0	0	0	0
200	0	0	0	0	0	0	0	0	0	0	0	0	0	0	0	0	0	0	0	0	0	0	0	0	0	0	0	0	0	0	0	0	0	0	0	0	0	0	0	0	-0.00357692170118396	0	0	0	0	0	0	0	0
201	0	0.0125046892584719	0	0	0	0	0	0	0	0	0	0	0	0	0	0	0	0	0	0	0	0	0	-0.0043010752688172	0	0	0	0	0	0	0	0	0	0	0	0	0	0	0	0	0	0	0	0	0	0	-0.0043010752688172	0	0
202	0	0	0	0	0	0	0	0	0	0	0	0	0.125104253544621	0	0	0	0	0	0	0	0	0	0	0	0	0	0	0	0	0	0	0	0	0	0	0	0	0	0	0	0	0	0	0	0	0	0	0	0
203	0	0	0	0	0.0186081131373279	0	0	0	0	0	0	0	0	0	0	0.0186081131373279	0	0.0051064591847187	0	-0.0032887355831719	0	0	0.00527981499467961	0	0	0.0558243394119836	-0.0877607506919598	-0.0067508269763046	0	0	0	0	0.0186081131373279	0	0	-0.0353985026731089	0	-0.0067508269763046	0	0	0	0	0	0	0.0186081131373279	0	0	0	-0.0135016539526092
204	0	0	0	0.0376789751318764	0	0.0753579502637528	0	0	0	0	0	0	0	0	-0.151351351351351	0.0376789751318764	0	0	0	0	0	0	0	0	0	0	0	0	0.242131204301513	0	0	0	0.188394875659382	0	0	0	0.111766023747938	0	0	0	0.150715900527506	0.0697936821523858	0	0	0	0	0	0	0.11796574268315
205	0	0	-0.00560852495793606	0	-0.00560852495793606	0	0	0	0	0	0	0	0	-0.00560852495793606	0	0	-0.00560852495793606	0	0	-0.00560852495793606	0	-0.00560852495793606	-0.0112170499158721	0.0334616028107746	0	0	0.0167308014053873	0	0	0	0	0.0278530778528385	0.0669232056215493	0	0	-0.00560852495793606	0	0	0	-0.00560852495793606	-0.0168255748738082	0	0.0334616028107746	0	0	0	0	-0.0112170499158721	0
206	0	0	0	0	0	0	0	0	0	0	0	0	0	0	0	0	0	0	0	0	0	0	0	0	0	0	0	0	0	0	0	0	0	0	0	0	0	0	0	0	0	-0.0125376128385155	0	0.0545107658762606	0	0	0	0	0
207	0	0	0	0	0	0	0	0	0	0	0	0	0	0	0	0	0	0	0	0	0	0	0	0	0	0	0	0	0	0	0	0	0	0	0	0	0	0	0	0	0	0	0	0	0	0	0	0.228354017847108	0
208	0	-0.0367376928728876	-0.0225862141060794	-0.0367376928728876	-0.0551065393093314	0.130081300813008	0.0141514787668082	0	-0.0551065393093314	-0.059323906978967	-0.210492046140153	0	-0.0551065393093314	0.159883634104526	0.227642276422764	-0.238795003673769	-0.090344856424318	-0.0367376928728876	-0.096061599851855	-0.0551065393093314	-0.118647813957934	0.0240855898639809	-0.110213078618663	-0.14695077149155	-0.0268035817757149	-0.349008082292432	-0.182189088606536	-0.110213078618663	0.0975609756097561	-0.0042173676696356	0	0	0	0	0	0	0	0	-0.0183688464364438	0	0	0	0	0	0	0	0	0	0
209	0	0	0	0.519031141868512	-0.686106346483705	0	0.0872470873123739	-0.171526586620926	-0.0857632933104631	0	0.260257467935212	0	-0.171526586620926	-2.13963095075585	0	-0.171526586620926	0	0	0	0	0	-0.257289879931389	-0.0857632933104631	0	0	0	0	-0.257289879931389	0	0.173010380622837	0	-0.171526586620926	0	0	0	0.346020761245675	-0.0857632933104631	0	0	0	0	0.173010380622837	0	0	0	0	0.17597796862666	0	-0.257289879931389
210	0	0	0	0	0	0	0	0	0	0	0	0	0	0	0	0	0	0	0	-0.0151034586920405	0	0	0	0.034965034965035	0	0	0	0	0	0	0	-0.030206917384081	0	0	0	0	0	0	0	0	0	0	0	0	0	0	0	0	0
211	0	0	0	0	0	0	0	0	0	0	0	0	0	0	0	0	0	0	0	0	0	0	0	0	0	0	0	0	0	0	0	0	0	0	0	0	0	0	0	0	0	0	0	0	0	0	0	0	0
212	0	0	0	0	0	0	0	0	0	0	0	0	0	0	0	0	0	0	0	0	0	0	0	0	0	0	0	0	0	0	0	0	0	0	0	0	0	0	0	0	0	0	0	0	0	0	0	0	0
213	0	0.0301114122252334	0	0	0	0	-0.0116658889407373	0	0	0	0.0301114122252334	0	-0.028218032478453	-0.0116658889407373	-0.0349976668222119	0	0	-0.0116658889407373	-0.0233317778814746	0	-0.0233317778814746	0	-0.0116658889407373	-0.0349976668222119	0	0	-0.0116658889407373	0	0	0	-0.0116658889407373	0	0	-0.0349976668222119	0	0.0301114122252334	-0.0116658889407373	0	0	-0.0349976668222119	0.0602228244504667	0	-0.0116658889407373	0	0	0	0	0	0
214	2.94238977855445	0	0	3.38986449709228	-0.0959692898272553	0	-0.0959692898272553	0	0	0	0.25582261437534	1.04477611940298	0	0	0	2.64388231586788	0	0	0	0.82046580915003	-0.0959692898272553	0	-0.191938579654511	-2.57025811441831	-0.287907869481766	0	0	-0.0959692898272553	0	0.362391497407397	0.383590683816997	0	0	0	0	0	0.149253731343284	-0.191938579654511	-2.71922537026957	-0.0959692898272553	0	-0.575815738963532	0	0	0	0	0	-2.51697367290228	-0.383877159309021
215	0	0	0	0	0	0	0	0	0	0	0	0	-0.00911244760342628	0	0	0	0	0	0	0	0	0	0	0	0	0	0	0.0174003828084218	-0.00911244760342628	0	0	0	0	-0.00911244760342628	0	0	0	0	0	0	0	0	0	0	0	0	0	0	0
216	0	0	0	-0.0312891113892365	0	0	0	0	0	0	0	0	0	0	0	0	0	0.0827129859387924	0	0	0	0	0	0	0	0	0	0	0	0	0	0	0	0	0	0	0	0	0	0	0	0	0	0	0	0	0	0	0
217	-1.04526275412351	-0.395569620253165	-0.522631377061757	-0.0791139240506329	0	-0.237341772151899	-0.316455696202532	-0.158227848101266	0	0	-0.0791139240506329	0	0	0	0	0	0.189393939393939	0	0	0	0	0	0	0	0	0	0	0	0	0	0	0	0	0	-0.0791139240506329	0	0	0	0	0	0	0	0	0	0	0	0	0.378787878787879	0
218	0	0	0	0	0	0	-0.0900900900900901	0	0	0	0	0	0	0	0	0	0	0	0	0	0	0	0	0	0	0	0	0	-0.0900900900900901	0.248756218905473	0	0	0	0	0	0	0	0	0	0	0	0	0	0	0	0	0	0	0
219	0	0	0	0	0	0	0	0	0	0	0	-0.0342407122068139	-0.0171203561034069	0	0	0	0.0740373467224819	0	0.0911577028258888	0.529825860851926	0.404427445819223	0	0.273473108477666	0	0.495585148645112	0	0	0.455788514129444	0.529825860851926	0	0	0.0911577028258888	-0.0342407122068139	0.0911577028258888	0	0.0569169906190749	0	-0.0342407122068139	0	0	0	0.0740373467224819	0.546946216955333	0	0	0.0911577028258888	0.455788514129444	0.256352752374259	-0.0342407122068139
220	0	0	0	0	0	0	0	0	0	0	0	0	0	0	0	0	0	0	0	0	0	0	0	0	0	0	0	0	0	0	0	0	0	0	0	0	0	0	0	0	0	0	0	0	0	0	0	0	0
221	0	0	0	0	0	0	0	0	0	0	0	0	0	0	0	0	0	0	0	0	0	0	0	0	0	0	0	0	0	0	0	0	0	0	0	0	0	0	0	0	0	0	0	0	0	0	0	0	0.140252454417952
222	0	0	0	0	0	0	0	0	0	0	0	0	0	0	0	0	0	0	0	0	-0.00589657409045345	0	0	0	0	0	0	0	0	-0.00589657409045345	0	0	0	0	0.0149009089554463	0	0	0	0	-0.0176897222713603	0	0	-0.0117931481809069	0	-0.0176897222713603	0	0	0	0
223	0	-0.0102022208599078	0	0	0	-0.0111890198418619	0	0	0	-0.00372967328062062	0	0	0	0	0	0	0	0	0	0	0	0	0	0	0	0	0	0	0	0	0	0	0	0	0	0.0121758188238159	0	0	0	0	0	0	0	0	0	-0.00745934656124124	0	0	0
224	0	0	0	0	0	-0.0186358553857622	0	0	0	-0.0055357539324257	0	0	0	0	0	0	0	-0.0186358553857622	0	0	0	0	0	0	0	-0.0186358553857622	0	0	0	0	0	0	0.0634719136781974	-0.0186358553857622	0	0	0	0	0	0	0	0	0	0	-0.0372717107715244	0	0	0	0
225	-0.0104467736880593	0.0122137404580153	-0.00348225789601978	-0.00782216135507147	-0.0104467736880593	0	-0.0113044192510913	-0.00696451579203956	0	0	-0.00433990345905167	-0.00696451579203956	-0.0174112894800989	0	-0.00696451579203956	-0.00348225789601978	-0.0174112894800989	0.00610687022900763	0	-0.00348225789601978	0.0157476739979271	-0.00696451579203956	0.00610687022900763	0	0	-0.00348225789601978	0	-0.00696451579203956	0.00610687022900763	-0.00348225789601978	0	-0.00348225789601978	0.0122137404580153	0.00610687022900763	0.0235698353529986	0.0244274809160305	-0.00348225789601978	-0.0174112894800989	0.00610687022900763	-0.00348225789601978	-0.0147350015032189	-0.0417870947522374	-0.00696451579203956	0	0	0	0	0	0
226	0	0	0	0	0	0	0	0	0	0	0	0	0	0	0	0	0	0	0	0	0	0	0	0	0	0	0	0	0	0	0	0	0	-0.0564971751412429	0.117855038302887	0	0	0	0	0	0	0	0	0	0	0	0	0.117855038302887	0
227	0	0	0.0174276751481352	0	0	0	0	0	0	0.0174276751481352	0	0	0	0	0	0	0	0	0	0	0	0	0	0	0	0	0.0174276751481352	0	0	0	0	0	0	0	0	0	0	0	0	0	0	0	0.0348553502962705	0	0.0174276751481352	0	0	0	0
228	0	0	0	0	0	0	0	0	0.13869625520111	0	0.0776515497815326	0	0.0462320850670365	0	0	0	0	0	0	0	0	0	0.647249190938511	0	0.759449825176158	0	0	0.750019876851864	0.13869625520111	0	0.231160425335183	0	0	0	0	0.403070369260204	0.273345234106171	-0.0148126203525404	0	0	0.0314194647144961	0	0.0628389294289923	1.8968508834807	0	0.0462320850670365	0.901734528396096	0	0
229	0	0	0	0	0	0.0206663176367107	0.0222485909225749	0	-0.0359938810402232	-0.0179969405201116	-0.0359938810402232	-0.00158227328586416	0	-0.00899847026005579	0	0	0	0	0	0	-0.00158227328586416	0	0	0	0.0148323939483833	0	0	0	0	0	0	0	0	0	0	0	0	0	0	0	0	0	0	-0.00899847026005579	0	0	0	0	0
230	0	0	0	0	0	0	0	0	0	0	0	0	0	0	0	0	0	0	-0.0296120817293456	0	0	0	0	0	0	0	0	0	0	0	0	0	0	0	0	0	-0.0592241634586911	0	0	0	0	0	0	0	0	0	0	0	0
231	0	0	0	0	0	0	0	0	0	0	0	0	0	0	0	0	0	0	0	0	0	0	0	0	0	0	0	0	0	0	0	0	0	0	0	0	0	0.0534486684800588	0	0	0	0	0	0	0	0	0	0	0.0059937956823936
232	0	0	0	0	0	0	0	0	0	0	0	0	0	0	0	0	0	0	0	0	0	0	0	0	0	0	0	0	0	0	0	0	0	0	0	0	0	0	0	0	0	0	0	0	0	0	0	0	0
233	0	0	-0.200066688896299	0	0.205338809034908	0	0	0.0684462696783025	0	-0.296585286585376	-0.133377792597533	-0.0333444481493831	0	-0.096518597689077	0	0	0	0.110577584725367	0.0351018215289194	0	0	0.040373941667528	-0.565098245159977	-1.39519470213548	-0.0666888962987663	-0.16496486736738	-0.200066688896299	-0.0333444481493831	0	0.177266481024133	0.050918181944746	-0.0333444481493831	0	-0.0666888962987663	-0.62827239469967	-0.0333444481493831	0	0	0.207096182414444	-2.22876025980825	-0.0666888962987663	0	0	0	0	-0.198309315516762	0	0	-0.78620776854891
234	0	0	0	0	0	0	0	0	0	0	0	0	0	0	0	0	0	0	0	0	0	0	0	0	0	0	0	0	0	0	0	0	0	0	0	0	0	0	0.0348918353105373	0	0	0	0	0	0	0	0	0	0
235	0	0	0	0	0	0	0	0	0	0	0	0	0	0	0	0	0	0	0	0	0	0	0	0	0	0	0	0	0	0	0	0	0	0	0	0	0	0	0	0	0	0	0	0	0	0	0	0	0
236	0	0	0	0	0	0	0	0	0	0	0	0	0	0	0	0	0	0	0	0	0	0	0	0	0	0	0	0	0	0	0	0	0	0	0	0	0	0	0	0	0	0	0	0	0	0	0	0	0
237	0.606773381629	-0.651701665459812	0.145614339261684	0.436977212181201	-0.40354938810039	-0.0104403240204201	-0.270750613670974	0.0473035246426599	-0.430240653494507	-0.132798774429419	-0.183671870009646	0.501591813927125	0.43340764124363	-0.9491435445249	0.167152539843659	-0.13716009230427	-0.65791486600153	-0.0992367559524598	0.36443172162285	0.48335479549043	0.0558919659962098	0.1832692868212	1.18328592692632	-0.08549524978676	0.0248393827272502	0.0585355956003569	-0.328494462334049	0.0817914844530401	-0.02510777151954	-0.443982159660199	-0.270750613670974	0.161999475031523	-0.167286734239808	-0.031978524602395	-0.198339317508774	0.69807924876904	0.82136364051146	0.19384380523777	-0.47080761945046	-0.80432095220049	-0.687907313540912	-0.583651687172464	0.15420278061524	-0.15698060461553	-0.412137829453947	-1.35004930302114	-0.88889026065382	-0.10703345036874	-0.70786202024832
238	0	0	0	0	0	0	0	0	0	0	0	0	0	0	0	0	0	0	0	0	0	0	0	0	0	0	0	0	0	0	0	0	0	0	0	0	0	0	0	0	0	0	0	0.023719165085389	0	0	0	0	0
239	0	0	0	0	0	0	-0.00906180148613544	0	-0.00906180148613544	0	0	0	0	0	0	0.00467989517034818	0	-0.00604120099075696	0	-0.00302060049537848	0	0	0	0	0	0	0	0	0	0	0	0	0	-0.00604120099075696	0	0	0	-0.00302060049537848	-0.00604120099075696	0	0	0	0	-0.00302060049537848	0	0	0.0016592946749697	0	0
240	0	0	0	0	0	0	0	0	0	0	0	0	0	0	0	0	0	0	0	0	0	0	0	0	0	0	0	0	0	0	0	0	0	0	0	0	0	0	0	0	0	0	0	0	0	0	0	-0.0243546030199708	0
241	0	0	0	0	0	0	0	0	0	0	0	0	0	0	0	0	0	0	0	0	0	0	0	0	0	0	0	0	0	0	0	0	0	0	0	0	0	0	0	0	0	0	0	0	0	0	0	0	0
242	0	0	0	0	0.451467268623025	0	0.451467268623025	0	0	-0.0412371134020619	0	0	0	-0.0824742268041237	0	0	0	-0.0412371134020619	0	-0.0824742268041237	-0.0412371134020619	0	0	0	0.614274743431617	0	0	0	0	0	0	0	0	0	0	0	-0.0412371134020619	0	0	0	0	0	0	-0.0412371134020619	0	0	0	0	0
243	0	0.0359289065470233	0	0	0	0	0	0	0	0	0	0	0	0	0	0	0	0	0	0	0	0	0	0	0	0	0	0	0	0	0	0	0	0	-0.166805671392827	0	0.87125110225108	0	0.024383883944655	0	0.119331742243437	0.238663484486873	0	0	0	0	0	0	0
244	0	0	0	0	0	0	0	0	0	0	0	-0.0122970978848992	0	0	0	0	0	0	0	0	0	0	0	0	0	0	0	0	0	0	0	0	0	0	0	0	0	0	0	0	0	0	0	0	0	0	0	0	0
245	0	0	0	0	0	0	0	0	0	0	0	0	0	0	0	0	0	0	0	0	0	0	0	0	0	0	0	0	0	0	0	0	0	0	0	0	0	0	0	0	0	0	0	0	0	0	0	0	0
246	0	0	0	0	0	0	0	0	0	0	0	0	0	0	0	0	0	0	0	0	0	0	0	0	0	0	0	0	0	0	0	0	0	0	0	0	0	0	0	0	0	0	0	0	0	0	0	0	0
247	0	0	0	0	0	0	0	0	0	0	0	0	0	0	0	0	0	0	0	0	0	0	0	0	0	0	0	0	0	0	-0.00814929508597506	0	0	0	0	-0.00814929508597506	0	0	0	0	0	0	-0.00814929508597506	0	0	0	0	0	0
248	0.024994254669065	0	0	0	-0.0683526999316473	0	-0.00976467141880676	0	0	0	0	0	0	0	0	0	0	0	0	0	0	0	0	0	0	-0.00976467141880676	0	0	0	-0.00976467141880676	0	0	0	0	0	0	0	0	0	0	0	0	-0.0335937738437756	0	0	-0.0195293428376135	0	0	0
249	0	0	0	0	0	-0.0433463372345037	0	0	0	0	0	0	0	0	0	-0.0216731686172518	0	0	0	0	0	0	0	0	0	0	0	0	0	0	0	0	0	0	0	0	0	0	0	0	0	0	0	0	0	0	0	0	0
250	0	0	0	0	0	0	0	0	0	0	0	0	0	0	0	0	0	0	0	0	0	0	0	0	0	0	0	0	0	0	0	0	0	0	0	0	0	0	0	0	0	0	0	0	0	0	0	0	0
251	0	-0.0211685012701101	0	0	0	0	0	0	0	-0.0635055038103302	0	0.118764845605701	0	0	0	0.0593824228028504	-0.0211685012701101	0	0	0	0	0	0	0	0	0	0	0.0593824228028504	0	0	0.0593824228028504	0	0	0	0	0	0	0	0.0382139215327403	0	0	0	0.237529691211401	-0.0846740050804403	-0.0211685012701101	0	0	0	-0.0211685012701101
252	0	0	0	0	0	0	0	0	0	0	0	0	0	0	0	0	0	0	0	0	0	0	0	0.0300390507659958	0	0	0	0	0	0	0	0	0	0	0	0	0	0	0	0	0	0	0	0	0	0	0	0	0
253	0	0	0	-0.0831946755407654	0	-0.0831946755407654	0	0	0	0	0	0	0	0	0	-0.0831946755407654	0	0	0	0	0	0	0	0	0	0	0	0	0	0	0	0	0	0	0	0	0	0	0	0	0	0	0	0	0	0	0	0	0
254	0	0	0	0	0	0	0	0	0	0	-0.00800704620065658	0	0	0	0	0	0	0	0	0	0	0	0	0	0	0	0	0	0	0	0	0	0	0	0	0	0	0	0	0	0	0	-0.00800704620065658	0	0	0	0	0	0
255	0	-0.0408830744071954	0	0	0.019173224945577	0	0.0558971492453885	-0.122649223221586	0	0.0558971492453885	0	0.25361674665794	0	0	0	-0.0817661488143908	0	0	0	0	0	0	-0.122649223221586	0	0	0	-0.0408830744071954	0	0	0	0	-0.0408830744071954	0	-0.163532297628782	0	0	0	0	0	-0.0817661488143908	-0.0667520739761975	-0.0408830744071954	0	0	0.0150140748381931	0	0	0	0
256	0	0	0	0	0	0	0	0	0	0	0	0	0	0	0	0	0	0	0	0	0.0649350649350649	-0.0493827160493827	0	0	0	0	0	0	0	0	0	0	0	0	0	0	0	0	0	0	0	0	0	-0.0493827160493827	0	0	0	0	0
257	0.320020622732881	0	-0.035445322138135	0.316706254948535	0.121250621443959	-0.0775193798449612	0.203741552965439	-0.114621885875269	-0.62015503875969	0.518790624021801	-0.074205012060616	0.320020622732881	0.00828591946086299	-0.310077519379845	0.557550313944282	0.139479644257855	-0.022187851000755	-0.114621885875269	0.277946565026054	0.01325747113738	1.07634093796608	0.166639046935131	0.358780312655361	0.357123128763188	0.00331436778434599	0.087462483197997	0.163324679150785	-0.0758621959527882	0.357123128763188	0.042074057706826	0.237529691211401	-0.348837209302326	-0.0371025060303082	-0.033788138245963	-0.190484081828058	0.636726877681416	0.168296230827303	0.045388425491171	0.677143751496069	-0.264689093888674	-0.229243771750538	-0.348837209302326	-0.230900955642711	0	-0.271317829457364	0.517133440129628	0.0791765637371338	-0.067576276491926	-0.310077519379845
258	0	0	0	0	0	0	0	0	0	0	0	0	0	0	0	0	0	0	0	0	0	0	0	0	0	0	0	0	0	0	0	0	0	0	0	0	0	0	0	0	0	0	0	0	0	0	0	0	0
259	0	0	0	0	0	0	0	0	0	0	0	0	0	0	0	0	0	0	0	0	0	0	0	0	0	0	0	0	0	0	0	0	0	0	0	0	0	0	0	0	0	0	0	0	0	0	0.0469373386528984	0	0
260	0	0	0	0	0	0	0	0	0	0	0	0	0	0	0	0	0	0	0	0	0	0	0	0	0	0	0	0	0	0	0	0	0	0	0	0	0	0	0	0	0	0	0	0	0	0	0	0	0
261	0	0	0	0	0	0	0	0	0	0	0	0	0	0	0	0	0	0	0	0	0	0	0	0	0	0	0	0	0	0	0	0	0	0	0	0	0	0	0	-0.119904076738609	0	0	0	0	0	0	0	0	0
262	0	0	0	0	0	0	0	0	0	0	-0.014421690222094	0	0	0	0	0	0	0	0	0	0	0	0	0	0	0	0	0	0	0	0	0	0	0	0	0	0	0	0	0	0	0	0	0	0	0	0	0	0
263	0	0	0	0	0	0	-0.0689069974094612	0	0	0	-0.0111370976723466	0	0	0	0	0	0	0	0	0	0	0	0	0	0	0	0	-0.0111370976723466	0	0	0	0	0	0	0	0	0	0	0	0	0	0	0	0	-0.0111370976723466	0	0	0	0
264	0	0	0	0	0	0	0	0	0	0	0	0	0	0	0	0	0	0	0	0	0	0	0	0	0	0	0	0	0	0	0	0	0	-0.0749625187406297	0	0	0	0	0	0	-0.0749625187406297	0	0	0	0	0	0	0	0
265	-0.0831255195344971	-0.0415627597672485	0	-0.0415627597672485	0	-0.0831255195344971	0	0	0	0	-0.0415627597672485	0	0	0	0	0	0	0.109051254089422	0	0	0	-0.0831255195344971	0	0	0	0	0.176539748411596	0	0	0	-0.0415627597672485	0	0	0	0	0	0	0	0	0	0	0	0	0	0	0	0	0	-0.0415627597672485
266	0	0	0	0	0	0	0	0	0	0	0	0	0	0	0	0	0	0	0	0	0	0	0	-0.169491525423729	0	0	0	0	0	0	0	0	0	0	0	0	0	0	0	0	0	0	0	0	0	0	0	0	0
267	0	-0.0240124864929763	0	0.00846381718154888	0	0	0	0	0.0013789650516703	0	0	0	-0.0120062432464882	0	0	0	0.00846381718154888	0	-0.0120062432464882	0	0	0.00846381718154888	0	0	-0.0240124864929763	0.00846381718154888	-0.0551098251158312	0	0	0	-0.0120062432464882	0	0	0.00846381718154888	0	0	-0.00354242606493932	0	0	-0.0360187297394645	-0.0466460079342824	0	0.0049213911166096	-0.0360187297394645	0.00846381718154888	0	-0.0310973386228549	0	0.00846381718154888
268	0	0	0	-0.00601684717208183	0	0	0	0	0	0	0	0	0	0	0	0	0	0	0	0	0	0	0	0	0	0	0	0	0	0	0	0	0	0	0	0	0	0	0	0	0	0	0	0	0	0	0	0	0
269	0	0	0	0	0	0	0	0	0	0	0	0	0	0	0	0	0	0	0	0	0	0	0	0	0	0	0	0	0	0	0	0	0	0	0	0	0	0	0	0	0	0	0	0	0	0	0	0	0
270	0	0	0	0	0	0	0	0	0	0	0	0	0	0	0	0	0	0	0	0	0	0	0	0	0	0	0	0	0	0	0	0	0	0	0	0	0	0	0	-0.0179694519317161	0	0	0	-0.0179694519317161	0	0	0	0	0
271	0	0.142651122043264	0	0	0	0	-0.372046633870207	0	0	0	0	-0.148257968865827	0.145454545454545	0	-0.0755306961385543	0	0	0	0	0	0	0	0	0	0	-0.0741289844329133	0	0	0	0	0.0727272727272727	0	0	0	0	0	-0.0741289844329133	0.145454545454545	0	0.142651122043264	0	0.0713255610216317	0	0	-0.0755306961385543	0.06571871419907	1.16363636363636	0.8	0.359431228519442
272	0	0	0	0	0	0	0	0	0	0	0	0	0	0	0	0	0	0	0	0	0	0	0	0	0	0	0	0	0	0	0	0	0	0	0	0	0	0	0	0	0	0	0	0	-0.0564971751412429	0	0	0	0
273	0	0	0	0	0	0	0	0	0	0	0	0	0	0	0	0	0	0	0	0	0	0	0	0	0	0	0	0	0	0	0	0	0	0	0	0	0	0	0	0	0	0	0	0	0	0	0	0	0
274	0	0	0	0	0	0.242835772000119	0	0	0	0	-0.0726216412490922	-1.63284147634985	-0.290486564996369	0	0	0	0	-1.76559933472162	0	-0.145243282498184	0	-1.0551901564458	-0.290486564996369	0	0	-0.217864923747277	0	-0.508351488743646	0.485671544000239	-5.68258615515373	-0.0726216412490922	0	-0.0726216412490922	0.157728706624606	-0.0726216412490922	0	0	0	0	0	-0.495866064617224	-0.145243282498184	0	0	-2.24897997521243	0	0	-0.580973129992738	0
275	0	0	0	-0.0421762969211303	0	0	0	0	0	0	0	0	-0.126528890763391	0	0	0	0	0	0	0	0	0	0	0	0	0	0	0	0	0	0	0	0	0	0	0	0	0	0	0	0	0	0	0	0	0	0	0	0
276	0	0	0	0	0	0	0	0	0	0	0	0	0	0	0	0	0	0	0	0	0	0	0	0	0	0	0	0	0	0	0	0	0	0	0	0	0	0	0	0	0	0	0	0	0	0	0	0	0
277	0	0	0	0	0	0	0	0	0	0	0	0	0	0	0	0	0	0	0	0	0	0	0	0	0	0	0	0	0	0	0	0	0	0	0	0	0	0	0	0	0	0	0	0	0	0	0	0	0
278	0	0	0	0	0	0	0	0	0	0	0	0	0	0	0	0	0	0	0	0	0	0	0	0	0	0	0	0	0	0	0	0	0	0	0	0	0	0	0	0	0	0	0	0	0	0	0	0	0
279	-0.0326797385620915	0	0.0616712920135677	-0.0163398692810458	0	0	0	-0.0326797385620915	0	-0.0163398692810458	0	0.0616712920135677	0	0	0	0	0	0	0	0	0	0	0	0.0308356460067838	0	-0.0163398692810458	0	0	-0.0326797385620915	-0.0163398692810458	0	0	0	0.014495776725738	0	0.0616712920135677	-0.0816993464052288	-0.0163398692810458	0	0	0	0	0	0	0	0	0	0	-0.0163398692810458
280	0	0	0	0	0	0	0	0	0	0	0	0	0	0	0	0	0	0	0	0	0	0	0	0	0	0	0	0	0	0	0	0	0	0	0	0	0	0	0	0	0	0	0	0	0	0	0	0	0
281	0	0	0	0	0	0	0	0	0	0	0	0	0	0	0	-0.00271983028259037	0	0	0	0	0	0	0	0	0	0	-0.00271983028259037	0	-0.00271983028259037	0	0	0	0	0	0	0	0	0	0	0	0	0	0	0	0	0	0	0	-0.00271983028259037
282	0	0	0	0	0	0	0	0	0	0	0	0	-0.00700133025274802	0	0	0	-0.00700133025274802	0	0	0	0	0	-0.014002660505496	-0.0210039907582441	-0.00700133025274802	0.0191204588910134	0	0	0	0	0	-0.00700133025274802	0	0	0	0	-0.00700133025274802	0.0573613766730402	0	0.0503600464202922	0.0382409177820268	-0.014002660505496	0	0.0363573859147961	-0.014002660505496	0	0	0	0
283	0	0	0	0	0	0	0	0	0	0	0	0	0	0	0	0	0	0	0	0	0	0	0	0	0	0	0	0	0	0	0	0	0	0	0	0	0	0	0	0	0	0	0	0	0	0	0	0	0
284	0	0	0	0	0	0	0	0	0	0	0	0	0	0	0	0	0	0	0	0.102179836512262	0	0	0.0340599455040872	0	0.0681198910081744	0	-0.0243546030199708	-0.0487092060399415	-0.195019317779126	-0.0243546030199708	-0.0487092060399415	0	0	-0.0243546030199708	0	-0.146127618119825	0.0388213699364659	0	0	-0.0730638090599123	0.0437652879882036	0	-0.0243546030199708	0.136239782016349	0	0	0	-0.151071536171563	0
285	0	0	0	0	0	0	0	0	0	0	0	0	0	0	0	0	0	0	0	0	0	0	0	0	0	0	0	0	0	0	0	0	0	0	0	0	0	0	0	0	0	0	0	0	0	0	0	0	0
286	0	0	0	0	0	0	0	0	0	0	0	0	0	0	0	0	0	0	0	0	0	0	0	0	0	0	0	0	0	0	-0.0148588410104012	0	0	0	0	0	0	0	0	0	0	0	0	0	0	0.0797130330809087	0	0	0
287	0	0	0	0	0	0	0	0	0	0	0	0	0	0	0	0	0	0	0	0	0	0	0	0	0.0821692686935086	0	0	0	0	0	0	-0.0785237534354142	0	-0.153401991612734	0	0	0	0	0	0	0	0	0	-0.0196309383588536	0	0	0	0	0
288	0	0	0	0	0	0	0	0	0	0	0	0	0	0	0	0	0	0	0	0	0	0	0	0	0	0	0	0	0	0	0	0	0	0	0	0	-0.049800796812749	0.05494738371741	0	0	0	0	0	0	0	0	0	0	0
289	0	0	0	0	0	0	0	0	0	0	0	0	0	0	0	0	0	0	0	0	0	0	0	0	0	0	0	0	0	0	0	0	0	0	0	0	0	0	0	0	0	0	0	0	0	0	0	0	0
290	0.0827814569536424	0	0	0	0	0	0	0.145597070857242	0	0	0	0	0	0.165562913907285	0	0	-0.0927643784786642	0	0	0	0	0	0	0	0	0	0	0	0	0	0	0	0	0	0	0	0	0	0	0	0	0	0	0	0	0	0	0	0
291	0	0	0	0	0.0140154169586545	0	0	0	0	0	0	0	0	0	0	0	0	0	0	0	0	0	0	0	0	0	0	0	0	-0.010120433154539	-0.030361299463617	0	0	0	0	0	0	0	0	0	0	0	0	0	0	0	0	0	0
292	0	0	-0.0106236056517582	0	0	-0.0106236056517582	0	-0.0106236056517582	0.115008625646924	0	0	0	0	0	0	0	0	0	0	-0.0106236056517582	0	0	0	0	0	0	0	0	0	-0.0106236056517582	0	0	0	0	0	0	0	0	-0.0106236056517582	0	0	0	0	0	0	0	0	0	0
293	0	0.296257274734096	0	0	0	0	0	0	0	0	0	0	0	0	0	0	0	0	0	0	0	0	0	0	0	0	0	0	0	0	0	0	0	0	0	0	0	0	0	0	0	0	0	0	0	-0.120409391932571	0	0	0
294	0	0	0	0	0	0	0	0	-0.0306184935701164	0	0	0	0	0	0.177304964539007	0	0	0	0	0	0	0	0	0	0.31617394778787	0	0	0	0	0	-0.0612369871402327	0	0	0	0	-0.091855480710349	0	0	0	0.1402804740872	0	0	0	0	0	0	0	0	0
295	0	0	0	0	0	0	0	0	0	0	0	0	0	0	0	0	0	0	0	0	0	0	0	-0.101936799184506	0	0	0	0	0	0	0	0	0	0	0	0	0	0	0	0	0	0	0	0	0	0	0	0	0
296	0	0	0	0	0	0	0	0	0	0	0	0	0	0	0	0	0	0	0	0	0	0	0	0	-0.0819672131147541	0	0	0	0	0	-0.163934426229508	0	0	0	0.66704352741662	-0.163934426229508	0	0	0	0	0	0	0	0	0	0	0	0	0
297	0	0	0	0	0	0.570342205323194	0	0	0	0	0	0	0	0	-0.0881057268722467	0	0	-0.0881057268722467	0	0	0	0	0	0	0	0	0	0	0	0	0	0	0	0	0	0	0	0	-0.0881057268722467	0	0	0	-0.0881057268722467	0	-0.26431718061674	0	0	0	0
298	0	0	0	0	0	0	0	0	0	0	0	0	0	0	0	0	0	0	0	0.0895255147717099	0	0	0	0	0	0	0	0	0	0	0	0	0	0	0	0	0	0	0	0	0	0	0	0	0	0	0	0	0
299	0	-0.00872752661895619	0	0	0	0	0	0	0	0	0	0	0	0	0	0	0	0	0	0	0	0	0	0	0	0	0	0	0	0	0	0	0	0	0	0	0	0	0	0	0	0	0	0	0	0	0	0	0
300	0	0	0	0	0.0904159132007233	-0.0300661455201443	0	0	0	0	0	0	0	0	0	0	0	0	0	0	0	0	0	0	0	0	0	0	0	0	0	0	0	0	0	0	0	0	0	0	0	0	0	0	0	0	-0.0300661455201443	0	0
301	0	0	0	0	0	0	0	0	0	0	0	0	0	0	0	0	0	0	0	0	0	0	0	0	0	0	0	-0.0178412132024978	0	0	0	0	0	0	-0.00892060660124889	0	0	0	0	0	0	0	0	0	0	0	0	0	-0.00892060660124889
302	0.0693962526023595	0	0	0	0	0	0	0	0	0	0	0	0	0	0	0	0	0	0	0	0	0	0	0	0	0	0	0	0	0	0	0	0	0	0	0	0	0	0	0	0	0	0	0	0	0	0	0	0
303	0	0	0	0	0	0	0.031486227721314	0.0294594196494329	0	0	0	0	0	0	0	-0.00842105263157895	0	0	0	0	0	0	0	0	-0.00842105263157895	0	0	0	-0.00842105263157895	0	0	0	-0.0336842105263158	0	-0.0168421052631579	0	0	0	0	0	0	0	0	0	0	0.0883782589482987	0	0	0
304	0	0	0	0	0	0	0	0	0	0	0	0	0	0	0	0	0	0	0	0	0	0	0	0	0	0	0	0	0	0	0	0	0	0	0	0	0	0	0	0	0	0	0	0	0	0	0	0	0
305	0	0	0	0	0	0	0.136633182344284	0	0	-0.0335795836131632	0	0	0	0	0.0851063829787234	0	0	0	0	0	0.170212765957447	0	0	0	0	0	0	0	0	0.0851063829787234	0	0	0.170212765957447	0	0	0	0	0	0.25531914893617	0	0	0.275581212580198	0	0	0	0	0	0	0
306	0	0	0	0	0	0	0	0	0	0	0	0	0	0	0	0	-0.0450653447498873	0	-0.0450653447498873	0	0.114678899082569	0	0	0	0	0	0	0	0	0.0573394495412844	0	0	0	0	0.344036697247706	0.0573394495412844	0	0.643008049745526	0	0.401376146788991	0	0	0	0	1.69142332069574	0.0573394495412844	0	0	0.172018348623853
307	0	0	0	0	0	0	0	0	0	0	0	0	0	0	0	0	0	0	0	0	0	0	0	0	0	0	0	0	0	0	0	0	0	0	0	0	0	0	0	0	0	0	0	0	0	0	0	0	0
308	0	0.020499471867189	0.0834028356964137	-0.114854517611026	0	0	0	0	0	0	0	0	-0.0382848392036753	0	0	0	0.333611342785655	0.0834028356964137	0	-0.0314516819146123	0	0	0.0834028356964137	-0.114854517611026	-0.0382848392036753	0	0	0	0	0	0	0	0	0	0	0	0.166805671392827	0	0	-0.0382848392036753	0	0	0	0	0	0	0	-0.0765696784073507	0.211923667885566
309	0	0	0	0	0	0	0	0	0	0	0	0	0	-0.0069886085680341	0	0	0	0	0	0	0	0	0	0	0	0	0	0	0	0	0	0	0	0	0	0	0.0742831674342594	0	0	0	0	0	0	-0.0069886085680341	0	0	0	0	0.0148566334868519
310	0	0	-0.102943325085424	0	-0.0235654530458348	0	0	0	0	0	0	0	0	0	-0.0086815129020855	0	0	0	0	0	0	0	0	0	0	0	0	0	0	0	0.0266666666666667	0.0297678802874985	-0.0204642394250029	0.186666666666667	0.08	0	0	0	0	0	0	0	0	0	0	0	0	0	0
311	0	0	0	0	0	0	0	0	0	0	0	0	0	0	0	0	0	0	0	0	0	0	0	0	0	0	0	0	0	0	0	0	0	0	0	0	0	0	0	0	0	0	0	0	0	0	-0.0626959247648903	0	0
312	0	0	0	0	0	0	0	0	0	0	0	0	0	0	0	0	0	0	0	0	0	0	0	0	0	0	0	0	0	0	0	0.015420200462606	0	0	0	0	0	0	0	0	0	0	0	0	-0.0062293652276833	0	0	0	0
313	0	0	0	-0.0059343659130022	0	0	0	0	0	0	-0.0118687318260044	0	0	0	0	-0.0059343659130022	0	0	0	0	0	0	-0.0059343659130022	0	0	0	0	0.0206590228282202	0	0	0	0	0	0	0	0	0	0.0103295114141101	-0.0059343659130022	-0.0118687318260044	0	0	0	0	0	0	-0.0059343659130022	0	0
314	0	0.0714540907466952	0	0	0	0	0	0	0	0	0	0	0	0	0	0	0.0357270453733476	0	0	0	-0.0246913580246914	0	0	0	0	0	0	0	0	0	0	0	0	0	0	0	0	0	0	0	0	0	0	0	0	0	0.0357270453733476	0	0
315	0	0	0	0	0	0	0	0	0	0	0	0	0	0	0	0	0	0	0	0	0	0	0	0	0	0	0	0	0	0	0	0	0	0.0151200198648532	0	0	0	0	0	0	0	0	0	0	0	0	0	0	0
316	0	0	0	0	0	0	0	0	0	0	0.884036425301309	0	0	0.318471337579618	0	0	0	0	0	0	7.55556767913729	0.318471337579618	0	0	0	0	5.40855712707484	0	0	2.81691421505112	0	0.318471337579618	0.422809912846602	0	0.565565087721691	0	0	0	0	0	0	0	0	0	0.318471337579618	0	0	0	0
317	0.206504904491482	0	0	0	0	0	0	0	-0.0522739153162572	0	0	0	0	0	0	-0.209095661265029	0	0	-0.0522739153162572	0	-0.104547830632514	0	0	0	0	-0.104547830632514	-0.0522739153162572	0	0	0	-0.0522739153162572	0	0	0	-0.0522739153162572	0	0	0	0	0	0	0	0	0	0	0	0	0.103252452245741	0.0516262261228704
318	0	0	0	0	0	0	0	0	0	0	0	0	0	0	0	0	0	0	0	0	0	0	0	0	0	0	0	0	0	0	0	0	0	0	0	0	0	0	0	0	0	0	0	0	0	0	0	0	0
319	0	0	0	0	0	0	0	0	0	0	0	0	0	0	0	0	0	0	0	0	0	0	0	0	0	0	0	0	0	0	0	0	0	0	0	0	0	0	0	0	0	0	0	0	0	0	0	0	0
320	0	0	0	0	0	0	0	0	0	0	0	0	0	0	0	0	0	0	0	0	0	0	0	0	0	0	0	0	0	0	0	0	0	0	0	0	0	0	0	0	0	0	0	0	0.129778518591147	0	0	0	0
321	0	0	0	0	0	0	0	0	0	0	0	0	0	0	0	0	0	0	0	0	0	0	0	0	0	0	0	0	0	0	0	0	0	0	0	0	0	0	0	0	0	0	0	0	0	0	0	0	0
322	0	0	0	0	0	0	0	0	0	0	0	0	0	0	0	0	0	0	0	0	0	0	0	0	0	0	0	0	0	0	0	0	0	0	0	0	0	0	0	0	0	0	0	0	0	0	0	0	0
323	0	0	0	0	0	0.00638447296175701	0	0.00638447296175701	0	0	0	0	-0.00385884350460167	0	0	0	0	0.00638447296175701	-0.00771768700920334	0	0	0	0	0	0	0	0	0	0	0	0	-0.00192942175230084	0	0	0	0	0	0	0	0	0	0	-0.00578826525690251	0	0	0	0	0	0.00638447296175701
324	0	-0.0486381322957198	0	0.0617283950617284	-0.0486381322957198	0	0	0	0	-0.0972762645914397	0	0	0	0	0	0	0	0	0	0	0	0	0	0	0	0	-0.0972762645914397	0	0	0	0	0	0	0	0	0	0	0	0	0	0	0	0	0	0	0	0	0	0
325	0	0	0	0	0	0	0.025	0	0	0	0	0	0	0	0	0	0	0	0	0	0	0	0	0	0	0	0	0	0	0	0	0	0	0	0	0	0	0	0	-0.0240847784200385	0	0	0	0	0	0	0	0	0
326	0	0	-0.147920938425548	-0.0743494423791822	0	0.149476831091181	0	-0.148698884758364	0.448430493273543	0	-0.0743494423791822	-0.148698884758364	0	0	0.0751273887119988	0	0	0	0	-0.0743494423791822	0	0	0	0	0	-0.0743494423791822	-0.446096654275093	0	0	0	0	0	0	0	-0.0743494423791822	0	0	0	0	-0.148698884758364	0	0	-0.0743494423791822	0	0	0	-0.0743494423791822	0	0
327	0	0	0	0	0	0	0	0	0	0	0	0	0	0	0	0	0	0	0	0	0	0	0	0	0	0	0	0	0	0	0	0	0	0	0	0	0	0	0	0	0	0	0	0	0	0	0	-0.0304599451720987	0
328	0	0	0	0	0	0	0	0	0	0	0	0	0	0	0	0	0	0	0	0	0	0	0	0	-0.103896103896104	0	0	0	0	0	0	0	0	0	0	0	0	0	0	0	0	0	0	0	0	0	0	0	0
329	0.103700380887783	-0.13599274705349	-0.161461830828536	-0.440270607326179	0.084446564240866	0.19497022751931	0.03911564855637	-0.27137747884445	0.129777479925363	0	-0.0453309156844968	0	0	0	-0.0453309156844968	0	0	0	0	0	0	0	0	0	-0.0906618313689937	0.17510839560986	0.278808776497643	-0.122954197534701	0.62902556771736	-0.453309156844968	0.33717824170093	-0.00621526712812698	0.563832820123414	0	0	0	-0.0453309156844968	0	0.14903129657228	-0.181323662737987	-0.0453309156844968	0	0	0.14903129657228	-0.0906618313689937	0	0.071408014722076	0.32413969218214	0.693610300048775
330	0	0	0	0	0.0125449802870665	0	0.060313630880579	-0.0528355054596689	0	-0.0352236703064459	0	-0.017611835153223	0	0	0	0	0	0	0	0	-0.017611835153223	0	0	0	0	0	0	-0.017611835153223	0	0.0904704463208685	0	0	0	-0.123282846072561	0	-0.0528355054596689	0	-0.017611835153223	0	-0.017611835153223	0	0	0	0	0	0	0	0	0
331	0	-0.0761962816214569	0.0461467466543609	0	0	0.0461467466543609	0	0	0	-0.0457177689728741	0	0	-0.0304785126485827	0	-0.0152392563242914	0	-0.0152392563242914	0	0.184586986617443	0	0	0.0461467466543609	0.138440239963083	-0.0152392563242914	0	0	0	0	0	0	0	0	0	0.0922934933087217	0	0	-0.0152392563242914	0	0	0	0	0	0	0	0	0	0	0	0
332	0	0	0	0	0	0	0	0	0.0938086303939962	0	0	0	0	0	-0.0311915159076731	0	0	0	-0.0311915159076731	0	0	0	0	0	0	0	0	0	0	0	0	0	0	0	0	0	0	0	0	0	0	0	0	0	0	0	0	0	0
333	0	0.31055900621118	0	0.097106146502914	0	0	-0.13558727990779	-0.174520069808028	-0.116346713205352	0.15527950310559	-0.116346713205352	0	0	-0.407213496218732	-0.116346713205352	0	0.038932789900238	0	0	-0.058173356602676	0	-0.058173356602676	0	-0.116346713205352	-0.232693426410704	0.31055900621118	-0.29086678301338	0	-0.174520069808028	0.252385649608504	-0.13558727990779	-0.038481133404876	-0.058173356602676	-0.349040139616056	-0.058173356602676	-0.077413923305114	-0.116346713205352	-0.058173356602676	0.349491796111418	-0.154827846610228	0.291318439508742	-0.349040139616056	-0.523560209424084	-0.232693426410704	-0.348588483120694	-0.232693426410704	-0.174520069808028	0.93167701863354	-0.116346713205352
334	-0.28957528957529	-0.0965250965250965	0.012083835613247	0	-0.0965250965250965	0.301659125188537	-0.28957528957529	0.150829562594268	1.06789077377313	0	0.0543044660691715	0	0	0.0543044660691715	0.012083835613247	-0.193050193050193	-0.482625482625483	0.380131262484204	0.603318250377074	0.259438494732612	0.120692767751591	0.012083835613247	-0.675675675675676	-0.235270823506118	-0.193050193050193	0.573181455534397	-0.28957528957529	-0.084441260911849	-0.28957528957529	0	-0.428321016556311	-0.0965250965250965	-0.844558197499376	-0.386100386100386	-0.482625482625483	0.150829562594268	-0.28957528957529	-0.180966357436946	-0.193050193050193	0.0543044660691715	0	0.410268057326881	0	-0.28957528957529	0	-0.675675675675676	-0.235270823506118	0.20513402866344	-0.193050193050193
335	-0.0665043643489104	0	0	0	0	0	0	0	0	0	0	0	0	0	0	0	0	0	0	0	0	0	0	0	0	0	0	0	0	0	0	0	0	0	0	0	0	0	0	0	0	0	0	0	-0.00237515586960394	0	0	0	0
336	0	0	0	0	0	0	0	0	0	0	0	0	0	0	0	0	0	0	0	0	0	0	0	0	0	0	0	0	0	0	0	0	0	0	0	0	0	0	0	0	0	0	0	0	0	0	0	0	0
337	0	0	0	0	0	0	0	0	0	0	0	0	0	0	0	0	0	0	0	0	0	0	0	0	0	0	0	0	0	0	0	0	0	0	0	0	0	0	0	0	0	0	0	0	0	0	0	0	0
338	0	0	0	0	0	0	0	0	0	0	0	0	0	0	0	0	0	0	0	0	0	0	-0.0157405949944908	0	0	0	0	0	0	0	0	0	0	0	0	0	0	0	0	0	0	0	0	0	0	0	0	0	0
339	-0.033311125916056	0	0	0	0	0	0	0	0	0	0	0.0730994152046784	0	0	0.0795765785772451	0	0.0730994152046784	0	0.0730994152046784	-0.148049448515804	0	0	-0.0999333777481679	0	0	0	0	0	0	0	0.119364867865867	0	0	0	0	0	0	0	0	0	0	-0.186912428751203	0	0	0	0	0	0	0
340	0	0	0	0.14591550542313	0.0455996352029184	0	0	0	0	-0.173298577128348	0	0	0	-0.912142429237796	-0.109449106165633	0	0	0	0.072949434646041	0	0	0	-0.556395402904635	-0.0364830353885443	0	-0.0364830353885443	0	0	0	0	0.0547162350172925	-0.145932141554177	-0.0364830353885443	0	0	0	0.0547162350172925	0	-0.182415176942722	0	0.291814374715211	-0.0364830353885443	-0.0729660707770887	0.0455996352029184	0	0	-0.127698941925429	-0.0729660707770887	0
341	0	0	0	0	0.158227848101266	0	0	0	0	0	0	0	0	0	0	0	0	0	0	0	0	0	0	0	0	0	0	0	0	0	0	0	0	0	0	0	0	0	0	0	0	0	0	0	0	0	0	0	0
342	0	0	0	0	0	0	0	0	0	0	0	0	0	0	0	0	0	0	0	0	0	0	0	0	0	0	0	0	0	0	0	0	0	0	0	0	0	0	0	0	0	0	0	0	0	0	0	0	0
343	0	-0.143129770992366	0	0	-0.143129770992366	0	0	0	-0.190839694656489	-0.123342245048722	-0.143129770992366	0	0.115207373271889	0.0098937629718226	-0.0954198473282443	-0.238549618320611	0	0.0576036866359447	-0.0477099236641221	0	0.288018433179723	-0.0954198473282443	0.0576036866359447	-0.0954198473282443	-0.0477099236641221	0	-0.0954198473282443	0	-0.228655855348788	-0.572519083969466	0.0576036866359447	-0.143129770992366	-0.190839694656489	0.0576036866359447	0	0	-0.0477099236641221	-0.0954198473282443	-0.0477099236641221	0	0	0	0	-0.0477099236641221	0	0	0	-0.0855260843564213	-0.190839694656489
344	0	0	0	0	0	-0.0383729854182655	0	0	0	0	0	0	0	0	0	0	0	0	0	0	0	0	0	0	0	0	0	0	0	0	0	0	0	0	0	0	0	0	0	0	0	0	0	0	0	0	0	0	0
345	0	0	0	0	0.248138957816377	0	0	0	0	0	0	0	0	0	0	0	0	0	0	0	0	0	0	0	0	0	0	0	0	0	0	0	0	0	0	0	0	0	0	0	0	0	0	0.124069478908189	0	0	0	0	0
346	0	0	0	0	0	0	0	0	0	0	0	0	0	0	0	0	0	0	0	0	0	0	0	0	0	0	0	0	0	0	0	0	0	0	0	0	0	0	0	0	0	0	0	0	0	0	0	0	0
347	0	0	0	0	0	0	0	0	0	0	0	0	0	0	0	0	0	0	0	0	0	0	0	0	0	0	0	0	0	0	0	0	0	0	0	0	0	0	0	0	0	0	0	0	0	0	0	0	0.0229042601923958
348	0	0	0	0	-0.0248323814253787	0	0	0	0	0	0	0	0	0	0	0	0	0	0	0	0	0	0	0	0	0	0	0	0	0	0	0	0	0	0	0	0	0	0	0	0	0	0	0	0	0	0	0	0
349	0	0	0	0	0	0	0	0	0	0	0	0	0	0	0	0	0	0	0	0	0	0	0	0	0	0	0	0	0	0	0	0	0	0	0	0	0	0	0	0	0	0	0	0	0	0	0	0	0
350	0	0	0	0	0	0	0	0	0	0	0	0	0	0	-0.0251193167545843	0	0	0.0142076565432333	0	0	-0.0251193167545843	0	0	0	0	0	-0.0251193167545843	0	0	0	0	0	0	0	-0.0502386335091686	0	0	0.0895656068069861	0	0	0	0	0	0	0	0	0	0	0
351	0	0	0	0	0	0	0	-0.132450331125828	0	0.0874125874125874	0	0	0	0	0	0	0	0	0	0	0	0	0	0	0	0	0	0	0	0	0	0	0	0	0	0	0	0	0	0	0	0	0	0	0	0	0	0	-0.0883002207505519
352	0	0	0	0	0	0	0.0288184438040346	0	0	0	0.115081485048603	0	0	0	0	0	0	0	-0.0290107339715695	0	0	0	0	0	0	0	0	0	0	0	0	0	0	-0.058021467943139	0	0	0	0	0	0	0	0	0	0	0	0	0	-0.0290107339715695	0
353	-0.076103500761035	0	0	0	0	0	0	0	0	0	0	0	-0.076103500761035	0	0	0	0	0	0	0	0	0	0	0	0	0	0	0	0	0	0	0	0	0	0	0	0.176991150442478	0	0	0	0	0	0	0	0	0.023033094920596	0	0	0
354	-0.0119853778390364	-0.00599268891951819	0	0	0	0	0	0	0	0	0	0	0	0	0	0	0	-0.00599268891951819	0	0	0	0	0	-0.00599268891951819	0.0204081632653061	0	0	0	0	0	0	0	0	0	0	0	0	0	0	0	0	0	0	0	0	0	0	0	0
355	0	0	0	0	0	0	0	0	0	0	0.749063670411985	0	0	-0.0488997555012225	0	0	0.374531835205993	0	0	0	0	0	0	0	0	0	0	0	0	0	0	0	0	0	0	0	0	0	0	0	0	0	0	0	0	0	0	0	0
356	0	0	0	0	0	0	0	0	0	0	0	0	0	0	0	0	0	0	0	0	0	0	0	0	0	0	0	0	0	0	0	0	0	0	0	0	0	0	0	0	0	0	0	0	0	0	0	0	0
357	0	0	0	0	0	0	0	0	0	0	0	0	0	0	0	0	-0.0146284376828555	0	0	0	0	0	0	0	0	0	0	0	0	0	0	0	0	0	0	0	0	0	0	0	0	0	0	0	0	0	0	0.0984251968503937	0
358	0	0	0	0	0	0	0	0	0	0	0	0	-0.0554938956714761	0	0	0	0	0.0633713561470216	0	0	0	0	0	-0.0554938956714761	0	-0.0554938956714761	0	0	0	0	0	0	0	0	-0.110987791342952	0	0	0	0	0	0	0	0	0	0	0	0	0	0
359	0	0	0	0	0	0.313479623824451	0	0	0	0	0	0	0	0	0	0	0	0.313479623824451	0	0	0	0	0	0	0	0	0	0	0	0	0	0	0	0	0	0	0	0	0	0	0	0	0	0	0	0	0	0	0
360	0	-0.0246426811237063	0	0	0	0	0	0	-0.0246426811237063	0	0	0	0.0917431192660551	0	0	0	0	0	0	-0.0492853622474125	0	0	0	0	-0.0739280433711188	0	0	0	0	0	0	0	0	0	0	0	0	0	0	0	0	0	0	0	0	0	0	0	0
361	0	0	0	0	0	0	0	0	0	0	0	0	0	0	0	0	0	0	0	0	0	0	0	0	0	0	0	0	0	0	0	0	0	0	0	0	0	0	0	0	0	0	0	0	0	0	0	0	0
362	0	0	0	0	0	0	0	0	0	-0.0816993464052288	0	0	0	0	0	-0.163398692810458	0	0	0	0	0	0	0	0	0	0	0	0	-0.0816993464052288	-0.163398692810458	0	0	-0.0816993464052288	0	-0.163398692810458	0	0	0	0	0	0	0	-0.326797385620915	0	0	0	0	0	0
363	0	0	0	0	0	0	0	0	0	0	0	0	0	0	0	0	0	0	0	0	0	0	0	0	0	0	0	0	0	0	0	0	0	0	0	0	0	0	0	0	0	0	0	0	0	0	0	0	0
364	0	0	0	0	0	0	0	0	0	0	0	0	0	0	0	0	0	0	0	0	0	0	0	0	0	0	0	0	0	0	0	0	0	0	0	0	0.761421319796954	0	0	0	0	0	0	0	0	0	0	0	0
365	0	0	0	0	0	0	0	0	0	0	0	0	0	0	0	0	0	0	0	0	0	0	0	0	0	0	0	0	0	0	0	0	0	0	0	0	0	0	0	0	0	0	0	0	0	0	0	0	0
366	0	0	0	-0.0886524822695035	0	0	0	0	0	0	0	0	0	0	0	0	0	0	0	0	0	0	0	0	0	0	0	0	0	0	0	0	0	0	0	0	0	0	0	0	0	0	0	0	0	0	0	0	0
367	0	0	0	0	0	0	0	0	0	0	0	0	0	0	0	0	0	0	0	0	0	0	0	0	0	0	0	0	0	0	0	0	0	0	0	0	0	0	0	0	0	0	0	0	0	0	0	0	0
368	0	0	0	0	0	0	0	0	0	-0.000133472500660689	0	0	0	0	0	0.000440342294075637	0	0	0.000827451532026512	0	0	0	0	0	0	0	0	0	0	0	0	0	0	0	-0.000266945001321378	0	0	0	0	0	0	0	0.000413725766013256	0.00124117729803977	0.000146780764691878	-0.000133472500660689	0	0	0
369	0	0	0	0	0	0	0	0	0	0	0	0	0	0	0	0	0	0	0	0	0	0	0	0	0	0	0	0	0	0	0	0	0	0	0	0	0	0	0	0	0	0	0	0	0	0	0	0	0
370	0	-0.00618142481842065	-0.00610385232821014	-0.00618142481842065	0.0096599996786835	0	0	0.00625899730863116	0	0	0	0	0	0	0	0	0	0	0	0	0	0	0	-0.00309071240921032	0	0	0	-0.00309071240921032	0	0	0	0	0	0	0	0	0	0	0	0	0	0	0	-0.00309071240921032	0	0	0	0	0
371	0	0	0	0	0	0	0	0	0	0	0	0	0	0	0	0	0	0	0	0	0	0	0	0	0	0	0	0	0	0	0	0	0	0	0	0	0	0	0	0	0	0	0	0	0	0	0	0	0
372	0	0	0	0	0	0	0	0	-0.000708978503771766	0	0	0	0	0	0	0	0	0	0	0	0	0.00848086504823492	0	0	0	0	0	0	0	0	0	0	0	0	0	0	0	0	0	0	0	0	0	0	0	0	0	0	0
373	0	0	0	0.00120687396367045	0	0	-0.00032685186093107	0	0	0	0	0	0	0	0	-0.000163425930465535	0	0	0	0	0	0	0	0	0	0	0	0	0	0	0	0	9.7436077835695e-05	0	0	-0.000490277791396605	0	0	0	-0.000163425930465535	0	0	0	0	-0.00032685186093107	0	0	0	-0.000163425930465535
374	0	0	0	0	0	0	0	0	0	0	0	0	0	0	0	0	0	0	0	0	0	0	0	0	0	0	0	0	0	0	0	0	0	0	0	0	0	0	0	0	0	0.000550202524331041	0	0	0	0	-0.000170030435447945	0	0
375	0	0	0	0	0.000631201414065776	0	0	0	0	0	0	0	0	0	0	0	0	0	0	0	0	-0.000358437070995631	0	0	0	0	0	0	0	0	0	0	0	0	0	0	0	0	0	0	0	0	0	0	0	0	0	0	0
376	0	0	0	0	0	0	0	0	0	0	0	0	0	0	0	0	0	0	0	0	0	0	0	0	0	0	0	0	0	0	0	0	0	0	0	0	0	0	0	0	0	0	0	0	0	0	0	0	0
377	0	0	0	-0.000251769942697161	0	0	-0.000251769942697161	0	0	0	0	0	0	0	0	0	0	0	0	0	0	0	0	0	0	0	0	0	0	0	0	0	0	0	0	0	0.0020188832883571	0	0	0	0	0	0	0	0	-0.000503539885394322	-0.0154308677429397	0	0
378	0	0	0	0	0	0	0	0	0	0	0	0	0	0	0	0	0	0	0	0	-0.000282955069564504	0	0	0	0	0	0	0	0	0	0	-0.000141477534782252	0	0	0	0	0	0	0	0	0.000942618121833392	0	0	0	-0.000141477534782252	0	0	0	0
379	0	0	0	0	0	0	0	0	0	0	0	0	0	0	0	0	0	0	0	0	0	0	0	0	0	0	0	0	0	0	0	0	0	0	0	0	0	0	0	0	0	0	0	0	0	0	0	0	0
380	0	0	0	0	0	0	0	0.00178823697716421	0	0	0	0	0	0	0	0	0	0	0	0	0	0	0	0	0	0	0	-0.000582367089271051	0	0	0	0	0	0.0107294218629853	0	0	0.00178823697716421	0.00299410686505738	0	0.00357647395432843	0	0	0	0	-0.000582367089271051	0	0	0	0
381	0	0	0	0	0	0	0	0	0	0	0	0	0	0	0	0	0	-0.00525306647755627	0.00564206725344166	0	0	0	0	0	0	0	0	0	0	0	0	0	0	0	0	0	0	0	0	0	0	0	-0.00262653323877814	0	0	0	0	0	0
382	0	0	0	0	0	0	0	0	0	0	0	0	0	0	0	0	0	0	0	0	0	0	0	0	0	0	0	0	0	0	0	0	0	0	0	0	0	0	0	0	0	0	0	0	0	0	0	0	0
383	0	0	0	0	0	0	0	0	0	0	0	0	0	0	0	0	0	0	0	0	0	0	0	0	0	0	0	0	0	0	0	0	0	0	0	0	0	0	0	0	0	0	0	0	0	0	0	0	0
384	0	0	0.00394079920703858	0	0	0	0	0	-0.00277184910053497	0	0	0.00335632415378677	0.000754212376715068	0	0	0	-0.000923949700178322	0	0	-0.00461974850089161	-0.000923949700178322	0	-0.000923949700178322	-0.00369579880071329	0	-0.00016973732346325	0	0	0	0	0	0	0	-0.00369579880071329	0	-0.000923949700178322	0	0	0	0.000754212376715068	0	0	0	0	0	0.000754212376715068	0	0	-0.000923949700178322
385	0	0	0	0	0	0	0	0	0	0	0	0	0	0	0	0	0	0	0	0	0	0	0	0	0	0	0	0	0	0	0	0	0	0	0	0.00117973155495127	0	0	0	0	0	0.000565713251267198	0	0.000565713251267198	0	0	0.000614018303684081	0	0
386	0	0	0.0038594737946306	0.00447707736389685	0	0.00347694734699465	0	0	0	0	0	0.0172907058863211	0	0	0	0.00247681733009246	0	0.0111926934097421	0	0	0	0	0	0	-0.0137635415884868	0	0	-0.00476237143636696	0	0	0	0	0	0	0	0	-0.0010001300169022	0	0	0	0	0	0	0	-0.0010001300169022	0	-0.0010001300169022	0	0
387	0	0	0	0	0	0	0	0	0	0	0	0	0	0	0	0	0	-0.00354572208630288	0	0	0	0	0	-0.0005022305928616	-0.00531858312945431	0	0	0	0	0	0	0	0	0	0	0	0	0	0	0	0	0	0	0	0	0	0	0	0
388	0	0	0	0	0	0	0	0	0	0	0	0	0	0	0	0	0	0	0	0	0	0	0	0	0	0	0	0	0	0	0	-0.00132340777502068	0	0	0	0	0	0	0	0	0	0	0	0	0	0	0	0	0
389	0	0	0	0	-0.000193490028007682	0	0	0	-0.000290235042011522	0	0	9.620466275772e-05	0	0.000869084072296207	0	0	0	0	0	0	0	0	0	0	0	0	0	0	0	0	0	0	0	0	0	0	0	0	0	0	0	0	0	0	0.000289694690765402	0	0	0	0
390	0	0	0	0	0	0	0	0	0	0	0	0	0	0	0	0	0	0	0	0	0	0	0	0	0	0	0	0	0	0	0	0	0	0	0	0	0	0	0	0	0	0	0	0	0	0	0	0	0
391	0	0	0	0	0	0	0	0	0	0	0	0	0	0	0	0	0	0.00116380564445738	0	0	0	0	0	0	0	0	0	0	0	0	0	0	0	0	0	0	0	0	0	0.00116380564445738	0	0	0	0	0	0	0	0	0
392	0	0	0	0	0	0	0	0	0	0	0	0	0	0	0	0	0	0	0	0	0	0	0	0	0	0	0	0	0	0	0	0	0	0	0	0	0	0	0	0	0	0	0	-0.0141823854772373	0	0	0	0	0
393	0	0	0	0	0	0	0	0	0	0	0	0	0	0	0	0	0	0	0	0	0	0	0	0	0	0	0	0	0	0	0	0	0	0	0	0	0	0	0	0	0	0	0	0	0	0	0	0	0
394	0	0	0	0	0	0	0	0	0	0	0	0	0	0	0	0	0	0	0	0	0	0	0	0	0	0	0	0	0	0	0	0	0	0	0	0	0	0	0	0	0	0	0	0	0	0	0	0	0
395	0	0	0	0	0	0	-0.000225622096525645	0	0	0	0	0	0	0	0	0	0	0	0	0	0	0	0	0	0	0	0	0	0	0	0	0	0	0	0	0	0	0	0	0	0	0	0	0	0	0	0	0	0
396	0	0	0	0	0	0	0	0	0	0	0	0	0	0	0	0	0	0	0	0	0	0	0	0	0	0	0	0	0	0	0	0	0	0	0	0	0	0	0	0	0	0	0	0	0	0	0	0	0
397	0	-0.00181054461181924	0	0	0	0	0	0	0	0	0	0.00462556084925297	0	0	0	0	0	0	0	0	0	-0.00181054461181924	0	0	0	0	0	-0.00362108922363847	0	0.00925112169850594	0	0	0	0	0	0	0	0	0	0	0	0	0	0	0	0	0	0	0
398	0	0	0	0	0	0	0	0	0	0	0	0	0	0	0	0	0	0	0	0	0	0.00819806525659944	0	0	0	0	0	0	0	0	0	0	0	0	0	0	0	0	0	0	0	0	0	0	0	0	0	0	0
399	0	0	0	0	0	0.00174483982552487	0	0	0	0	0	0	0	0.00292940142564203	0	0	0	0	0	0	0	0	0	-0.000624283374709448	0	0	0	0	0	0	0	0	0.000560278225407711	-0.000208094458236483	0	0	0	0	0	0	0	0	0	0	0	0	0	0	0
400	0	0	0	0	0	0	0	0	0	0	0	0	0	0	0	0	0	0	0	0	0	0	0	0	0	0	0	0	0	0	0	0	0	0	0	0	0	0	0	0	0	0	0	0	0	0	0	0	0
401	0	0	0	0	0	0	0	0	0	0	0	0	0	0	0	0	0	0	0	-0.0104253544620517	0	0	0	0	0	0	0	0	0	0	0	-0.0104253544620517	0	0	0	0	0	0	0	0	0	0	0	0	0	0	0	0	0
402	0	0	0	0	0	0	0	0	0	0	0	0	0	0	0	0	0	0	-0.00220541208124738	0	0	0	-0.000388298016074809	0	0	0	-0.00220541208124738	0	0	0	0	0.00402252614641995	0	0	-0.00220541208124738	0	0	0	0	0	0	0	0	0	0	0	0	-0.00220541208124738	-0.00441082416249476
403	0	0	0	0	-0.000161417113119499	0	0	0	0	0	-0.000161417113119499	0	0	0	0.00171916815183693	0	0	0	0.00057305605061231	0	0.000984694988105121	0	0.00238102891370305	0.00327691919055436	0.00410019706553998	0.00171916815183693	0	0.00102542875195635	0	0.000750665473119938	0	0	0.00123491681247843	0.00229222420244924	0	0	0	0	0.00255863833621068	0.00057305605061231	0	-0.000807085565597494	0	0	0	0	0	0	0
404	0	0	0	0	0	0	0	0	0	0	0	0	0	0	0	0	0	0	0	0	0	0	0	0	0	0	0	0	0	0	0	0	0	0	0	0	0	0	0	0	0	0	0	0	0	0	0	0	0
405	0	-0.00378842118866127	0	0	-0.000174998031272148	0	0	0	-0.000349996062544296	0.000380763812207288	0	0	0	0.000380763812207288	0	0	0	0	0	0	0	0	0	0	0	0	-0.000349996062544296	0.001348057217557	0	0	0	0	0	0	0	0	0	0	0	0	0	0	0	0	0	0	0	0	0
406	0	0	0	0	0	0	0	0	0	0	0	0	0	0	0	0	0	0	0.000989599311238879	0	0.000989599311238879	0	0	0	0	0	0	0	0	0	0	0	0	0	0	0	0	0	0	0	0	0	0	0	0	0	0	0	0
407	0	0	0	0	0	0	0	0	0	0	0	0	0	0	0	0	0	0	0	0	0	0	0	0	0	0	0	0	0	0	0	0	0	0	0	0	0	0	0	0	0	0	0	0	0	0	0	0	0
408	0	0	0	0	0	0	0	0	0	0	0	0	0	0	0	0	0	0	0	0.00669926977959402	0	0	0	0	0	0	0	0	0	0	0	0	0	0	0	0	0	0	0	0	-0.00231755081230156	0	0	-0.00231755081230156	0	0	0	0	0
409	-0.00448658586343732	-0.0153994764178018	-0.0125995716145651	0.0111659283216536	-0.00559980960647338	0.00391312854627275	-0.0153994764178018	0.00782625709254549	-0.00559980960647338	-0.00308663346181897	-0.00139995240161835	-0.00979966681132841	0.0025131761446544	-0.00279990480323669	0	0.0025131761446544	0	0	0.0195656427313637	-0.00279990480323669	0	0	0.0025131761446544	0	0	0	0	0	0.00391312854627275	0	0	0	0	-0.00139995240161835	0	0	0	0	0	0	-0.00139995240161835	0	-0.00279990480323669	0	0	0	0	0	0
410	0	0	0	0	0	0	0	0	0	0	0	0	0	0	-0.00109493047191503	0	0	0	0	0	0	0	0	0	0.00225024206655977	0	0	0	0	0	0.00444010301038984	0	0	0	0	0.00222005150519492	0	0	0.00222005150519492	0	0	0	0	0	0	0	0	0	0
411	0	0	0	0	0	-0.00760649087221095	0	0	-0.00253549695740365	0	0	0	0	0	0	0	0	0	0	0	0	0	0	0	0	0	0	0	0	0	0	0	0	0	0	0	0	0	0	0	0	0	0	0	0	0	0	0	0
412	0	0	0	0	0	0	0	0	-0.00175183504721195	0	0	0	0	0	0	0	0	0	0	0	0	0	0	0	0	0	0	0	0	0	0	0	0	0	0	0	0	0	0	0	0	0	0	0	0	0	0	0	0
413	0	0	0	0	0	0	0	0	0	0	0	0	0	0	0	0	0.0189000189000189	0	-0.00420804578353812	0	0	0	0	0	0	0	0	0	0	0	0	0	0	0	-0.00420804578353812	0	0	0	0	0	0	0	0.00945000945000945	0	0	0	0	0	0
414	0	0	0	0	0	0	0	0	0	0	0	0	0	0	0	0	0	0	0	0	0	0.00872866931436302	0	0	0	0	0	0	0	0	0	0	0	0	0	0	0	0	0	0	0	0	0	0	0	0.00436433465718151	0	0	0
415	0	0	0	0	0	0	0	0	0	0	0	0	0	0	0	0	0	0	0	0	0	0	0	0	-0.00224502166445906	0	0	0	0	0	0	0	0	0	-0.00224502166445906	0	0	0	0	0	-0.00224502166445906	0	0	0	0	0	0	0	0
416	0	0	0	0	0	0	0	0	0	0	0	0	0	0	0	0	0	0.00244255915064076	0	0	0.00244255915064076	0	0	-3.91602999211929e-05	0	0	-0.00064721838882113	0	0	0	0	0	0	0	0	0	0	0	0	0	0	0	0	0	0	0	0	0	0.000814186383546922
417	0	0	0	0	0	0	0	0	0	0	0	0	0	0	0	0	0	0	0	0	0	0	0	0	0	0	0	0	0	0	0	0	0	0	0	0	0	0	0	0	0	0	0	0	0	0	0	0	0
418	0	0	0	0	0	0	0	0	0	0	0	0	0	0	0	0	0	0	0	0	0	0	0	0	0	0	0	0	0	0	0	0	0	0	0	0.02002002002002	0	0	0	0	0	0	0	0	0	0	0	0	0
419	0	0	0	0	0	0	0	0	0	0	0.00617373559840312	0	0	0	0	0	0	0	0	0	0	0	0	0	0	0	0	0	0	0	0	0	0	0	0	0	0	0	0	0	0	0	0	0	0	0.0130395097144347	0	0	0
420	-0.0163044364371546	-0.0176958282301178	-0.00489133093114637	-0.00163044364371545	-0.01793488008087	-0.0308190613300922	-0.00489133093114637	-0.0163044364371546	-0.00489133093114637	-0.00326088728743091	-0.0211957673683009	-0.00652177457486182	-0.00326088728743091	-0.00815221821857728	-0.00489133093114637	-0.012963865199473	-0.00652177457486182	0.00334057123768164	0	0	0	-0.00163044364371545	0	-0.00163044364371545	0	0	-0.00163044364371545	0	0	0	0	-0.00163044364371545	0	0	-0.00644209062461109	-0.00326088728743091	-0.00163044364371545	0	0	0.00334057123768164	-0.00163044364371545	0	0	0	-0.00326088728743091	0	0.00505069883164784	0	0
421	0	0	0	0	0	0	0	-0.0619195046439628	0.011113757243788	0	0	-0.0928792569659443	0	0	-0.0309597523219814	0	-0.143685004366119	0	-0.0309597523219814	-0.0619195046439628	0	0	0	0	0	0	0	0	0	0	0	0	0	0.0674763832658569	0	0.140509645153608	0	0	0.0365166309438755	0	0	-0.0309597523219814	0	0	-0.231007382710169	-0.0309597523219814	0	0.410415178217036	0
422	0	0	0	0	0	0	0	0	0	0	0	0	0	0	0	0	0	0	0	0	0	0	0	0	0	0	0	0	0	-0.0298195914715968	0	0	0	0	0	0	0	0	0	0	0	0	0	0	0	0	0	0	0
423	0	0	0	0	0	0	0	0	0	0	0	0	0	0	0	0	0	0	0	0	0	0	0	0	0	0	0	0	0	0	0	0	0	0	0	0	0	0	0	0	0	0	0	0	0	0	0	0	0
424	0	0	0	0	0	0	0	0	0	0	0	0	0	0	0	0	0	0	0	0	0	0	0	0	0	0	0	0	0	0	0	0	0	0	0	0	0	0	0	0	0	0	0	0	0	0	0	0	0
425	0	0	0	0	-0.000557485073337161	0	0	0	0	0	0	0	0	0	0	-0.000557485073337161	0	0	0	0	0	0	0	0	0	0	0	0.00157015450320312	0	0	0	0.00314030900640623	0	0	0	0	0	0	0	0	-0.000557485073337161	0	0	0	0	0	0	-0.000557485073337161	0
426	0.00266091908145073	0	0	0	0	0	0	0	0	0	0	0	0	0	0	0	0	0	0	0	0	0	0	0	0	0	0	0	0	0	0	-0.00241893542651879	0	0	0	0	0	0	0	-0.00120946771325939	0	0	0	0	0	0	0	0	0
427	0	0.00503220611916264	0	0	0	0	0.0093691946079181	0	-0.0473202803949148	0.00503220611916264	0	0	-0.00931396703914736	0	0	0.00144566282958513	0	-0.00358654328957751	0	0	0	-0.0056721961807993	0	0.0100644122383253	-0.01434617315831	0	0	0	0	0	0	0.135174347586985	0	0.0698661231754114	0	0	0.14818531305325	0.000750445199177899	0	0.00503220611916264	0.0093691946079181	0.00503220611916264	-0.0107596298687325	0	0.185662091484923	0.063277799089122	0.31570677253727	0.0115100750679104	0
428	0	0	0	0	0	0	0	0	0	0	0	0	0	0	0	0	0	0	0	0	0	0	0	0	0	0	0	0	0	0	0	0	0	0	0	0	0	0	0	0	0	0	0	0	0	0	0	0	0
429	0	0	0	0	0	0	0	0	0	0	0.0491360248955859	0	0	0	0.0265772621731445	0.0163786749651953	0	0.0101985872079492	0	0.146798720361992	0	-0.0370805265434769	0.00818933748259766	0.145094147799023	0	0.0347665996557422	0	0	0	0.028586511898496	0	-0.0185402632717385	-0.00618008775724615	0.0055707334324796	0	0.00818933748259766	0.024568012447793	0	0	0	0	0	0	0	0	0.00818933748259766	0	0	0
430	0	0	0	0	0	0	0	0	-0.00883080183680678	0	0	0	0	0	0	0	0	0	0	0	0	0	0	0	0	0	0	0	0	0	0	0	0	0	0	0	0	-0.00883080183680678	0	0	0	0	0	0	0	0	0	0	0
431	0	0	0	0	0	0	0	0	0	0	0	0	0	0	0	0	0	0	0	0	0	0	0	0	0	0	0	0	0	0	0	0	0	0	0	0	0	0	0	0	0	0	0	0	0	0	0	0	0
432	0	0	0	0	0	0	0	-0.0191314329443275	0	0	0	0	0	0	0	0	0	0	0	0	0	0	0	0	0	0	0	0	0	0	0	0	0	0	0	0	0	0	0	0	0	0	0.0272034820457018	0	0.0080720491013743	0	0	0	0
433	0	0	0	0	0	0	0	0	0	0	0	0	0	0	0	0	0	0	0	0	0	0	0	0.0042004452471962	0	0	0	0	0	0	0	0	0	0	0	0	0	0	0	0	0	0	0	0	0	0	0	0	0
434	0	0	0	0	0	0	0	0	0	0	0	0	0	0	0	0	0	0	0	0	0	0	0	0	0	0	0.00248118435199735	0	0	-0.000571668672270925	0	0	0.00219535001586189	0	0	0	0	0	0	0	0.00330824580266314	0.000827061450665784	0	0.00302241146652768	0	-0.000285834336135463	0.000827061450665784	0.00165412290133157	0.00817928983343604
435	0	0.0348068221371389	0	-0.0103939299449122	0.0348068221371389	-0.0103939299449122	0	0	0	0	0	0	0	0	0	0	0	0	0	0	0	0	0	0	0	0	0	0	0	-0.23906038873298	0.0174034110685694	0	0	0	0	0	0	0	0	0	0	0	0	0	0	0	0	0	0
436	0	0.0210973849471131	0	0	0	0	0	0	-0.00228498309112513	0	0.00641683778234086	0	0	0	0	0	0	0	-0.00228498309112513	0	0	0	0	0	0	0	0	0	0	0	0	0	0	0	0	0	0	-0.00456996618225025	0	0	0	0	0.0128336755646817	0	-0.0091399323645005	0	0	0	0
437	-0.000214633727543946	0	0	0	0	0	0	0.00236144650876848	0.000858693412104142	0.00257608023631243	0	0	-0.000858534910175785	0	0	0	0.00364956587788887	0	0	0	0	0	0	0	0	0	0	0	0	0	0	0	0	0	0	0	0	0	0	0	0.000644059684560196	0	0	0.00214681278122454	0	0	0	-0.000643901182631839	0.000644059684560196
438	0	0	0	0	0	0	0	0	0	0	0	0	0	0	0	0	0	0	0	0	0	-0.000161626610205104	0	0	0	0	0	0	-0.000161626610205104	0	0	0	0	0	0	0	0	0	0	0	0	0	0	0	-0.000323253220410208	0	0	0	0
439	0	0	0	0	0	0	0	0	0	0	0	0	0	0	0	0	0	0	0	0	0	0	0	-0.00526555972899919	0	0	-0.00702074630533226	0	0	0	0	0	0	0	0	0	0	0	0	0	0	0	0	0	0	0	0	0	0
440	0	0	0	0	0	0	0	0	0	0	0	0	0	0	0	0	0	0	0	0	0	0	0	0	0	0	0	0	0	0	0	0	0	0	0	0	0	0	0	0	0	0	-0.00523834468308015	0	0	0	0	0	0
441	0	0	0	0	0	0	0	0	0	0	0	0	0	0	0	0	0.0181950509461426	0	0.0363901018922853	0	0	0	0	0	0	0	0	0	0	0	0	0	0	0	0	-0.00930665425779432	0	0	0	-0.00930665425779432	0	-0.00930665425779432	0	-0.00930665425779432	0	0	0.0909752547307132	0	0
442	0	-0.00238971466806863	0	0	0.00722382119042012	0	0	0	2.73385931071103e-05	0	0	0	0.0001640315586427	0.0384814820270621	0.00722382119042012	0.00480676792924438	-0.00477942933613727	-0.00955885867227453	0	0	0	0	-0.00475209074303015	0	-0.00955885867227453	0	0	-0.00477942933613727	0	0	0	0	-0.00711446681799165	-0.00955885867227453	0	-0.0070597896317775	0	-0.00238971466806863	0	0	0.00241705326117575	-0.00472475214992305	0	0	0	0.00966821304470297	0	0.00480676792924438	0
443	0	0	0	0	0	0	0.0035785857429144	0	0	0	0	0	0	0	0	0	0	0	0	0.0035785857429144	0	0	0	0	0	0	0	0	0	0	0	-0.00129002296240873	0	0	0	0	0	0	-0.00129002296240873	0	0	0	0	0	0	0	0	0	0
444	0	0	0	0	0	0	0	0	0	0	0	0	0	0	0	0	0	0	0	0	0	0	0	0	0	0	0	0	0	0	0	0	0	0	0	0	0	0	0	0	0	0	0	0	0	0	0.000121630382296455	0	0
445	0	0	0	0	0	-0.00310896937665164	0	0	0	0	0	0	0	0	0	0	0	0	0	0	0	0	0	0	0	0	0	0	0	0	0	0	0	0	0	0	0	0	0	0	0	0	0	0	0	0	0	0	0
446	0	0	0	0	0	0	0	0	0	0	0	0	0	0	0	0	0	0.0104733975701718	0	0	0	0	0	0	0	0	0	0	0	0	0	0	0	0	0	0	0	0	0	0	0	0	0	0	0	0	0	0	0
447	0	0	0	0	0	0	0	0	0	0	0.0143410296859315	0	-0.00401074880680223	0	0	0	0	0	0	0	0	0	0	0	0	0	0	0	0	-0.00401074880680223	0	0	0	-0.0160429952272089	-0.00401074880680223	0	0	0	0	0	0	-0.00401074880680223	0	0	0	0	0	0	0
448	0	-0.00427058421592074	0	0	0	0	-0.00427058421592074	0	0	0	0.00933358222885944	0	0	-0.00854116843184148	0.00933358222885944	0	0	-0.00427058421592074	0	0	0	0	-0.00427058421592074	0	0.0280007466865783	0.00933358222885944	-0.00854116843184148	-0.00427058421592074	0	0	0	-0.017082336863683	0	-0.0128117526477622	0	0	0	0	0	0.0186671644577189	0	-0.00854116843184148	0	0	-0.00427058421592074	0	0	0	0
449	0	0	0	0	0	0	0	0	0	0	0	0	0	0	0	0	0	0	0	0	0	0	0	0	0	0	0	0	0	0	0	0	0	0	0	0	0	0	0	0	0	0	0	0	0	0	0	0	0
450	-0.000231351881584853	-0.000925407526339412	0	0	0	-0.000925407526339412	0	0	0	-0.00138811128950912	0	-0.000231351881584853	0	0	-0.000231351881584853	0	0	-0.000231351881584853	0	0	0	0	0	0	0	0	0	0	0	0	0	-0.000231351881584853	0	0	-0.000231351881584853	0	0	-0.000231351881584853	0	0	0	0	0	0	0	-0.000231351881584853	0	0	0
451	0	0	0	0	0	0	0	0	0	0	0	0	0	0	0	0	0	0	0	0	0	0	0	0	0	0	0	0	0	0	0	0	0	0	0	0	0	0	0	0	0	0	0	0	0	0	0	0	0
452	0	0	0	0	0	0	0	0	0	0	0	0	0	0	0	0	0	0	0	0	0	0	0	0	0	0	0	0	0	0	0	0	0	0	0	0	0	0	0	0	0	0	0	0	0	0	0	0	0
453	0	0	0	0	0	0	0	0	0	0	0	0	0	0	0	0	0	0	0	0	0	0	0	0	0	0	0	0	0	0	0	0	0	0	0	0	0	0	0	0	0	0	0	0	0	0	0	0	0
454	0	0	0	0	0	0	0	0	0	0	0	0	0	0	0	0	0	0	0	0	0	0	0	0	0	0	0	0	0	0	0	0	0	0	0	0	0	0	0	0	0	0	0	0	0	0	0	0	0
455	0	0	0	0	0	0	0	0	0	0	0	0	0	0	0	0	0	0	0	0	0	0	0	0	0	0	0	0	0	0	0	0	0	0	0	0	0	0	0	0	0	0	0	0	0	0	0	0	0
456	0	0	0	0	0	0	0	0	0	0	0	0	0	0	0	0	0	0	0	0	0	0	0	0	0	0	0	0	0	0	0	0	0	0	0	0	0	0	0	0	0	0	0	0	0	0	0	0	0
457	0	-0.000312130036912999	0	0	0	0	0.0176289114147201	0	0	0	-0.00456329287213653	0	0	0	0.00881445570736007	0	0	0	0.00881445570736007	0	0.0065328092712918	0	0	0	0	0	0.00881445570736007	0	0	0	0.0264433671220802	0	0	-0.00228164643606827	0	0	0	0.0153472649786518	0	0.0610769298776945	0	0.0627343162399368	-0.0114082321803413	0.0914593297980853	0	-0.0068449393082048	0	-0.00912658574427307	0
458	0	0	0	0	0	-6.4075865825137e-05	0	0	0	0	0	0	-6.4075865825137e-05	0	0	0	0	0	0	0	0	0	0	0	0	0	0	0	0	0	0	0	0	0	0	0	0	0	0	0	0	0	0	0	0	0	0	0	0
459	0	0	0	0	0	0	0	0	0	0	0.0106236056517582	0	0	0	0	0	0	0	0	0	0.0212472113035164	0	0	0	0	0	0	0	0	0.0106236056517582	0	-0.0106786267286027	0	0	-0.0106786267286027	0	0	0	0	0	0	0	0	0	0	0	0	0	0
460	0	0	0	0	0	0	0	0	0	0	0	0	0	0	0	0	0	0	0	0	0	0	0	0	0	0	0	0	0	0	0	0	0	0	0	0	0	0	0	0	0	0	0	0	0	0	0	0	0
461	0	0	0	0	0	0	0	0	0	0	0	0	0	0	0	0	0	0	0	0	0	0	0	0	0	0	0	0	0	0	0	0	0	0	0	0	0	-0.0763934827155109	0	0	0	0	0	0	0	0	0	0	0
462	0	0	0	0	0	0	0	0	0	0	0	0	0	0	0	0	0	0	0	0	0	0	0	0	0	0	0	0	0	0	0	0	0	0	0	0	0	0	0	0	0	0	0	0	0	0	0	0	0
463	0	0	0	0	0	0	0	0	0	0	0.00293057468569587	0	0	0	0	0	0	0	0	0	0	0	0	0	0	0	0.000976858228565288	0	0	0	0	0	0	0	0	0	0.00195371645713058	0	0	0	0	0	0	0	-0.00158943161190444	0	0	0	0
464	0	0	-0.00366059008712204	0	0	0	0	0	0	0	0	0	-0.00732118017424409	0	0	0	0	0	0	0	-0.00366059008712204	0	0	0	0	-0.00366059008712204	0	0	0	0	-0.0109817702613661	0	0	0	0	0	0	0	0	0	0	0	0	0	0	0	0	0	0
465	0	0	0	0	0	0	0	0	0	0	0	0	0	0	0	0	0	0	0	0	0	0	0	0	0	0	0	0	0	0	0	0	0	0	0	0	0	0	0	0	0	0	0	0	0	0	0	0	0
466	0	0	0	0	0	0	0	0	0	0	0	0	0	0	0	0	0	0	0	0	0	0	0	0	0	0	-0.00170633904956915	0	0	0	0	0	0	0	0	0	0	0	0	0	0	0	0	0	0	0	0	0	0
467	0	0	0	0	0	0	0	0	0	0	0	0	0	0	0	0	0	0	0	0	0	0	0	0	0	0	0	0	0	0	0	0	0	0	0	0	0	0	0	0	0	0	0	0	0	0	0	0	0
468	0	0	0	0	0	0	0.000854364950532269	-0.00046990935448552	0	-0.00046990935448552	0	0	0	0	0.000854364950532269	0	0	0	0	0	0	0	0	0	0	0	0	0	0	0	0	-0.00046990935448552	0	0	0	0.000854364950532269	0	0	0.00512618970319362	-0.00046990935448552	0	0.00256309485159681	0	0.000854364950532269	0.00884265134293064	0	0.000384455596046749	0.00760383079635165	0
469	0	0	0	0	0	0	0	0	0	0	0	0	0	0	0	0	0	0	0	0	0	0	0	0	0	0	0	0	0	0	0	0	0	0	0	0	0	0	0	0	0	0	0	0	0	0	0	0	0
470	0	0.187799141712078	-0.01557753719137	0.0216356555603635	0.035482542525042	0.00692344348233919	0.0151452959224836	-0.00389438429784251	-0.0047597094111883	0	0	-0.00389438429784251	0.073997514536872	-0.0233663057870551	0.0298575080005078	-0.00778876859568502	-0.01557753719137	-0.155340602918096	-0.0116831528935275	0	0	0	0	0	-0.0233663057870551	0	0	-0.00389438429784251	0	0	-0.0194719214892126	0	0	0	0	0	0	0	0	0	0.00302905918449668	0	0	-0.00389438429784251	0	0	0	0	0
471	0	0	0	0	0	0	0	0	0	0	0	0	0	0	0	0	0	0	0	0	0	0	0	-0.0181290790427846	0	0	0	-0.00906453952139231	0	0	0	0	0	0	0	0	0	0	0	0	0	0	-0.00906453952139231	0	0	0	0	0	0
472	0	0	0	0	0	0	0	0	0.0117354266748492	0	0	0	0	0	0	0	0	0	0	0	0	-0.00368582064796727	0	0	0.00759762953958365	0	0	0	0	0	0	0	0	0	0	0	0	-0.00368582064796727	0	0.00022598824364911	0	0	-0.0589731303674763	0	0	0	0	0	0
473	0	0	0	0	0	0	0	0	0	0	0	0	0	0	0	0	0	0	0	0	0	0	0	0	0	0	0	0	0	0	0	0	0	0	0	0	0	0	0	0	0	0	0	0	0	0	0	0	0
474	0	-0.00785854616895874	0	0	0	0.0113546042920404	0	0	0	0	0	0	0	0	0	0	0	0	0	-0.0235756385068762	0	0	0	0	0.0227092085840808	0	0	0	0	0	0.0227092085840808	-0.0235756385068762	0	0.0131178025695313	0	0	0	0	0	0.0113546042920404	0	0	0	0	0	0	0	0	0
475	0	0	0	0	0	0	0	0	0	0	0	0	0	0	0	0	0	0	0	0	0	0	0	0	0	0	0	0	0	0	0	0	0	0	0	0	0	0	0	0	0	0	0	0	0	0	0	0.0081712698153293	0
476	0	0	0	0	0	0	0	0	0	0	0	-0.00336496399488525	0	0.00969743987587277	0	0.00969743987587277	0	0	0	0	0	0	-0.00336496399488525	0	0	0	0	0	0	0	-0.00336496399488525	0	0	0	0.00969743987587277	0	0	0	0	0	0	-0.0100948919846558	0	-0.00672992798977051	0	0	0	0	0
477	0	0	0	0	0	0	0	0	0	0	0	0	0	0	0	0	0	0	0	0	0	0	0	0	0	0	0	0	0	0	0	0	0	0	0	0	0	0	0	0	0	0	0	0	0	0	0	0	0
478	0	0	0	0	0	0	0	0	0	0	0	0	0	-0.00050979312594949	0	0	0	0	0	0	0	0	0	0	0	0	0	0	0	0	0	0	0	0	0	0	0	0	0	0	0	0	0	0	0	0	0	0	0
479	0	0	0	0	0.0176495959394389	-0.0107146683810136	0	0	0.0201694231544978	0	0.208629159103403	0.0201694231544978	0	0	0	0.199174404329919	0	0	-0.105251410681829	0	0	0	0	0	0.134886394043837	0	0	0.0176495959394389	0	0	0.0283642643204525	0	0	0.0201694231544978	-0.0132344955960724	0	-0.011974581988543	-0.0214293367620272	0	0	0	0	0	-0.0107146683810136	0	0.0794177790104618	0	0	0
480	0	0	0	-0.00264634275431354	0	0	0	0	0	-0.00529268550862708	0	0	0	0.0154974687467714	0	-0.00264634275431354	0.00516582291559045	-0.00793902826294062	0	-0.00264634275431354	-0.00793902826294062	0	-0.00529268550862708	0	0	0.00516582291559045	0	0	0	0	0	0.00251948016127691	-0.00529268550862708	0	0	-0.00264634275431354	0	-0.00793902826294062	-0.00264634275431354	-0.00806589085597725	0.0153706061537347	0	0.0128511259924579	0.00516582291559045	0	-0.00264634275431354	0	0	-0.00529268550862708
481	0	0	0	0	0	0	0	0	0	0	0	0	0	0	0	0	0	0	0	0	0	0	0	0	0	0	0	0.00872866931436302	0	0	0	0	0	0	0	0	0	0	0	0	0	0	0	0	0	0	0	-0.00115791667631597	0
482	0	0	0	0	0	0	0	0	0	0	0	0	0	0	0	-0.000167963061563501	0	0	0	0	0	0	0	0	0	0	0	-0.000167963061563501	0	0	0	0	0	0	0	0	0	0	0	0	0	0	0	0	0	0	0	0	0
483	0	0	0	0	0	0	0	0	0	0	0	0	0	0	0	0	0	0	0	0	0	0	-0.00751766651631334	0	0.00717093512881006	0	0	0	0	0	0	0	0	0	0	0	0	0	0	-0.00751766651631334	0	0	0	0	0	0	0	0	0
484	0	0	0	0	0	0	0	0	0	0	0	0	0	0	0	0	0	0	0	0	0	0	0	0	0	0	0	0	0	0	0	0	0	0	0	0	0	0	0.0038717670744928	0	0	0	0.00166792317035656	0	0	0	0	0.0038717670744928	0
485	0	0	0	0	0	0	0	0	0	0	0.0441696113074205	0	0	0	0.0441696113074205	-0.0087404947120007	0	0	0	0	0	0	0	0	0	0	0	0	0	0	0	0	0	0	0	0	0	0	0	0	0	0	0	0	0	0	0	0	0
486	0	0	0	0	0	0	0	0	0	0	0	0	0	0	0	0	0	0	0	0	0	0	0	0	0	-0.00106614354556698	0	0	0	0	0	0	0.0170961045304677	0	0	0	0	0	0	0	0	0	-0.00106614354556698	0	0	0	0	0	0
487	0	0	0	0	0	0	0	0	0	0	-0.0552791597567717	0	0	0	0	0	0	0	0	0	0	0	-0.110558319513543	0	0	0	0	0	0	0	0.869359208100285	-0.0552791597567717	0	0	-0.110558319513543	0	0	1.7246411146476	0	0	0.503521042132333	0	0	1.36584159945614	0	1.08343719635089	0	0.592963409316426	0
488	0	0	0	0	0	0	0	0	0	0	0	0	0	0	0	0	0	0	0	0	0	0	0	0	0	0	0	0	0	0	0	0	0	0	0.0337495781302734	0	-0.0371402042711235	0	0	0	0	0	0	0	0	0	0	0	0
489	0	0	0	0.0335683115139309	0	-0.00985221674876847	-0.0197044334975369	0	0	0.0167841557569654	0	-0.00985221674876847	0	-0.0197044334975369	-0.00985221674876847	0	0	0	0.00693193900819693	-0.0197044334975369	0	-0.00985221674876847	0	-0.00985221674876847	0	0	0.0237160947651624	-0.0394088669950739	-0.0295566502463054	-0.00985221674876847	-0.0029202777405715	0	0	0	0	-0.00985221674876847	0	0	0	0	0	-0.0295566502463054	0	0	-0.00985221674876847	0	0	-0.00985221674876847	0
490	0	0	0	0	0	0	0	0	0	0	0	0	0	0	0	0	0	0	0	0	0	0	0	0	0	0	0	0	0	0	0	0	0	0	0	0	0	0	0	0	0	0	0	0	0	0	0	0	0
491	0	0	0	0	0	0	0	0	0	0	0	0	0	0	0	0	0	0	0	0	0	0	0	0	0	0	0	0	0	0	0	0	0	0	0	0	0	0	0	0	0	0	0	0	0	0	0	0	0
492	0	-0.534923781266774	0.022443251536645	0	-0.060248222677431	0.0654450261780105	0	-0.244419311227178	0	0	0	0	0	0	0	0	0	0	0	0	0	0	0	0	0	0	0	0.0327225130890052	0	0	0	0	0	0	0	0	0	0	0	0	0	0	0	0.0413457371070381	0	0	0	0	0
493	0	-0.0134934556739981	0	0	0	0	0	0	0	0	0	0	0	0	0	0	0	0	0	0	0	0	0	0	0	0	0	0	0	0	0	0	0	0	0	0	0	0	0	0	0	0	0	0	0	0	0	0	0
494	-0.0987670033143651	-0.000109151934313018	0.00458334352547901	-0.019438503616896	-0.591398704659905	0.025180020024635	0.063703868300047	0.0225810148959696	-0.00116478275434539	0.0040852948010733	-0.004177531627496	0.0216529683063965	-0.00264294536641199	0.038779016736331	0.017201370148466	0.006685621904156	-0.036767457995821	-0.192547419808408	0.00761432948093699	-0.00688020557896799	-3.01955255832965	-0.917680450475005	-0.025597068705163	0.014454560745409	0.024604005632862	0.013290438978272	0.02349346835207	0.01302383852097	-0.0081806996241128	-0.014473458814925	-0.00814403024565899	0.00265873371372499	0.107916114270224	0.060059537587154	0.138274195067787	0.025676551560785	0.026749097488707	0.02511414734086	0.045619248000801	0.301909578877017	0.177385684945195	0.087152540213322	0.006531673531048	0.0035975513124725	-0.017197209011377	0.00236491291272721	-0.0216780104746277	-0.0282061838557945	-0.0080430053716874
495	0	0	0	0	0	0	0	0.00190418158275573	0	0	0	0	0	0	0	0	0	0	0	-0.00049261960905253	0	0	0	0	0	0	-0.00430098277456399	0	0	0	0	0	0	0	0	0	0	0	0	0	0	0	0	0	0	0	0	0	0
496	0	0	0	0	0	0	0	0	0	0	0	0	0	0	0	0	0	0	0	0	0	0	0	0	0	0	0	0	0	0	0	0	0	0	0	0	0	0	0	0	0	0	0	0	0	0	-0.010527423939362	0	0
497	0	0	0	0	0	0	0	0	0	0	0	0	0	0	0	0	0	0	0	0	0	0	0	0	0	0	0	0	0	0	0	0	0	0	0	0	0	0	0	0	0	0	0	0	0	0	0	0	0
498	0	0	0	0	0	0	0	0	0	0	-0.00315030085373153	0	0	0	-0.00315030085373153	0	0	0	0	0	-0.00945090256119459	0	0	0	0	0	0	0	0	0	0	0	0	-0.00315030085373153	0	0	0	0	0	0	0	0	0	0	0	0	0	0	0
499	0	0	0	0	0	0	0	0	0	0	0	0	0	0	0	0	0	0	0	0	0	0	0	0	0	0	0	0	0	0	0	0	0	0	0	0	0	0	0	0	0	0	0	0	0	0	0	0	0
500	0	0	0	0	0	0	0	0	0	0	0	0	0	0	0	0	0	0	0	0	0	0	0	0	0	0	0	0	0	0	0	0	0	0	0	0	0	0	0	0	0	0	0	0	0	0	0	0	0
501	0	0	0.803657709263594	0.0748643737634399	2.17752367324056	0.089086859688196	0	0.02495479125448	0	-0.137120470127326	0	0.089086859688196	0.183539872041254	2.23572243466273	0.138996442197156	0	0	0.208494663295734	6.53148033828576	0.00187597206983001	0.044543429844098	0.178173719376392	0.489977728285078	0.005366152664862	0	1.39694478316162	3.22025875326386	0.0748643737634399	0.98959708046393	0.114041650942676	-0.0979431929480901	3.74457113315258	0.691492030390744	4.27883052773712	0.760990251489326	0.219226968625458	0.228083301885352	-3.1263292680001	1.08352656572773	0.279868856464142	-6.3909133148208	0.424493214870783	-0.04803361043913	-5.52726812658012	0.302947675648792	0.089086859688196	-7.67425271961413	-0.302685912104164	-1.47237631127176
502	0	0	0	0	0	0	0	0	0	0	0	0	0	0	0	0	0	0	0	0	0	0	0	0	0	0	0	0	0	0	0	0	0	0	0	0	0	0	0	0	0	0	0	0	0	0	0	0	0
503	0	0	0	0	0	0	0	0	0	0	0	0	0	0	0	0	0	0	0	0	0	0	0	0	0	0	0	0	0	0	0	0	0	0	0	0	0	0	0	0	0	0	0	0	0	0	0	0	0
504	0	-0.00334492908750334	0	0.00346284368723596	0	-0.00167246454375167	0	0	-0.00167246454375167	0	0	0	-0.00167246454375167	0	0	0	0	0	0	0	0	0	0	0	0	0	0	0	0	0	0	0	0	0	0	0	0	0	0	0	0	0	0	0	0	0	0	0	0
505	0	0	0	0	0.000236004818929784	0	0	0	0.000440738675153386	-0.000204733856223602	-0.000189098374870511	-0.000818935424894409	0	0	0	0	-0.00078766446218823	0	0	0	0	-0.000614201568670806	0.000440738675153386	-0.00102366928111801	0	0	0	0	0	0	0	0	-0.000204733856223602	0	-0.000393832231094114	0	0	0	0	0	0	0	0.000425103193800295	0	0	0	0	0	0
506	-0.136109976861304	0.126835553215843	-0.01951962180506	-0.103728432514241	0.216203912899826	-0.00927442364546099	0.013684897476134	0.036718118387732	0.0178736719367966	-0.00315417740061008	0.110755630727317	0.060500414443459	-0.017799772146793	-0.033130619491191	0.0672320134965202	0	0	-0.0068054988430652	0	0	0	0	-0.0136109976861304	0	0	0.0246791707798618	0	0	0	0.0357473438735932	0.0740375123395854	-0.002542824592399	-0.154732723942229	0.310731821558611	-0.421940928270042	0.187409867449305	-0.042405043136651	0.25037920669516	0.408625529743927	-0.357251739365921	0.069922637668926	-0.202445115633688	0.177913744433834	0.0596035397193234	-0.0093483234354642	-0.0136109976861304	0.0246791707798618	0.060426514653455	-0.0272219953722608
507	0	0	0	0	0	0	0	0	0	0	0	0	0	0	0	0	0	0	0	0	0	0	0	0	0	0	0	0	0	0	0	0	0	0	0	0	0	0	0	0	0	0	0	0	0	0	0	0	0
508	0	0	0	0	0	0	0	0	0	0	0	0	0	0	0	0	0	0	0	0	0	0	0	0	0	0	0	0	0	0	0	0	0	0	0	0	0	0	0	0	0	0	0	0	0	0	0	-0.000266628272195471	0
509	0	0	0	0	0	0	0	0	0	0	0	0	0	0	-0.000289724066798781	0	0	0	0	0	0	0	0	-0.000289724066798781	0	0	0	0	0	0.000410974479731545	0	0	0.000990422613329107	0.00053222489266431	0	0	0	0	0	0	0	0	-0.000289724066798781	0	0	0	0	-0.0014486203339939	0
510	0	-0.00589448865310934	0	0	0	0	-0.00589448865310934	0	0	0	0	0	0	0	0	0	0	0	0	0	0	0	0	0	0	0	0	0	0	0	0	0	0	0	0	0	0	0	0	0	0	-0.0117889773062187	0	0	0	0	0	0	0
511	0	0	0	0	0	0	0	0	0	0	0	0	0	0	0	0	0	0	0	0	0	0	0	0	0	0.0113147770988912	0	0	0	0	0	0	0	0	0	0	0	0	0	0	0	-0.00202404566247015	0	0	0	0	0	0.00160929722450529	0
512	0	0	0	0	0	0	0	0	0	0	0	0	0	0	0	0	0	0	0	0	0	0	-0.000622411804247338	0	0	0	0	0	0	0	0	0	-0.000414941202831559	0	0	0	0.000642289634087595	0	0	0	0	0	0	0	0	0	0	0	-0.000207470601415779
513	0	0	0	0	0	0	0	0	0	0	0	0	0	0	0	0	0	0	0	0	0	0	0	0	0	0	0	0	0	0	0	0	0	0	0	0	0	0	0	0	-0.0115707260630605	0	0	0	0	0	0	0	0
514	-0.0149432157800359	0	0	0	0	0	0	0	0	0	0	0	0	0	0	0	0	0	0	0	0	0	0	0	0	0	0	0	0	0	0	0	0	0	0	0	0	0	0	0	0	0	0	0	0	0	-0.0149432157800359	0	0
515	0	0	0	0	0	0	0	0	0	0	0	0	0	0	0	0	0	0	0	0	0.0103691414350892	0	0	-0.00392618767177071	0	0	0	0	-0.00392618767177071	0	0	0	0.0207382828701783	0	0	0	0	0	0	0	0	0	0	0	0	0	0	0	0
516	0	0	0	0	0	0.0041466246475369	0	0	0	0	0	0	0	0	-0.013595371531292	0	0	0	0.0124098073278458	0	0	0.00829324929507381	0	0	0	0	-0.0102792118390723	0	0	-0.00151059683681022	0.00112543097391645	0	0	-0.0105741778576716	0	0	0	0	0	0	0	-0.00453179051043067	0	0	0.00074026511102269	0	0	0	0
517	-0.00397408894011048	-0.0119222668203314	0.00862195590180912	-0.00959833333948208	-0.00397408894011048	0	0	0.00629802242095982	-0.00397408894011048	0	-0.00794817788022096	-0.0238445336406629	-0.0317927115208838	-0.00794817788022096	0	0.00232393348084934	0	0	0	0	0	0	0	-0.0175465112197031	0.0069718004425481	0.00629802242095982	-0.0238445336406629	-0.00794817788022096	0	0	-0.00794817788022096	0	0.00232393348084934	0	0	-0.0158963557604419	-0.0278186225807734	0.00232393348084934	0	0.0125960448419196	0	-0.0198704447005524	0.00629802242095982	-0.0278186225807734	-0.0158963557604419	-0.00397408894011048	0	0	0
518	0	0	0	0	0	0	0	0	-0.00272329300590274	-0.000680823251475684	0	0.00113068956364385	0	0	0	0	0.0178962187783347	0	0	0.00339206869093155	0	-0.00136164650295137	0	0	0	0	0	0	0	0	0	-0.00136164650295137	0	-0.00658932314189616	-0.00136164650295137	-0.0018235603815664	0	-0.00816987901770821	0	0	0	0	0	0	-0.000680823251475684	0	-0.000680823251475684	0	-0.00204246975442705
519	0	0	0	0	0	0	0	0	0	0	0	0	0	0	0	0	0	0	0	0	0	0	0	0	0	0	0	0	0	0	0	0	0	0	0	0	0	0	0	0	0	0	0	0	0	0	0	0	0
520	-0.0100080064051241	0	0	0.0752671985548698	0	0.015053439710974	0	0	0	0	-0.0900720576461169	0	0	-0.069724604009566	0	0	-0.0200160128102482	0	0	0	-0.0100080064051241	0	0	0	0	0	0	0	0	0	0	0	0	0.015053439710974	0	0	0	0.0050454333058499	0	0	0	0	0	0	0	-0.0100080064051241	0	-0.0100080064051241	0
521	0	0	-0.00297176820208024	0	0	0	0.00297388849570203	0	-0.0178242483316161	0	0	0	0.00594565669778227	0	0.00594565669778227	0	0	0	0	0	0	0	0	0	0	0	0	0.00297388849570203	0	0	0	0	0	0	0.0118913133955645	0	0	0	0	0	0	0	0	0	0	0	0	0	0
522	0	0	-0.00764292265362275	0	0	0	0	0	0.0193124758594052	0	0	0	0	-0.00764292265362275	0	0	0	0.0193124758594052	0	0	-0.00764292265362275	0	0	0	0	0	0	-0.00764292265362275	0	-0.00764292265362275	0	0	0	0	0	0	0	-0.0152858453072455	0	0	0	0	0	0.0193124758594052	0	-0.00764292265362275	0	0	0
523	-0.0111650756433875	0	-0.00558253782169374	0	-0.00558253782169374	0	0	0	-0.0111650756433875	0	-0.00558253782169374	-0.022330151286775	0	0	0	0	0	0	-0.0390777647518562	0	-0.0111650756433875	-0.022330151286775	-0.0167476134650812	-0.00558253782169374	0	-0.0111650756433875	0	0	0	-0.0111650756433875	0	0	0	-0.0111650756433875	-0.00558253782169374	-0.0111650756433875	-0.00558253782169374	-0.0167476134650812	0	0	0	-0.00558253782169374	0	0	0	-0.00558253782169374	0	0	0
524	0	0	0	0	0	0	0	0	0	0	-0.0168067226890756	0	0	0	0	0	0	0	0	0	0	0	0	0	0	0	0	0	0	0	0	0	0	0	0	0	0	0	0	0	0	0	0	0	0	0	0	0	0
525	0	0	0	-0.00936504963476306	-0.0374601985390523	0	0	0	0	0	-0.00936504963476306	0	0	0	-0.0187300992695261	0	-0.0280951489042892	-0.00936504963476306	0	0	0	0	0	-0.00936504963476306	0	0	0.0391849529780564	0	0	0	0	0	0	-0.00936504963476306	0	0	0	0	0	0	0	0	0	0	0	0	0	0	0
526	0	0	0	0	0	0	0	0	0	0	0	0	0	0	0	0	0	0	0	0	0	0	-0.000731587764926219	0	0	0	0	0	0	0	0	0	0	0	0	0	0	0	0	0	0	0	0	0	0	0	0	0	0
527	-0.0228571428571429	0	-0.00380952380952381	0	0	0	0	0	0	0	0	-0.00761904761904762	0	0	0	0	0	0	-0.00380952380952381	-0.0018601688166905	0.0535117056856187	0	0	0	0	0	0	0	0	0	0	0	0	0	0	0	0	0	0	0	0	0	0	0	0	-0.00761904761904762	0	0	0
528	0	0	0	0	0	0	0	0	0	0	0	0	0	0	0.00219380170592716	0	0	0	0	0	0	0	0	0	0	0	0	0	0	0	0	0	0	0	0	0	0.00882573584572614	0	0	0	0	0	0	0	0	0	0	0	0
529	0	0	0	0	0	0	0	0	-0.000836540070269366	0	0.00197612836929887	0	0	0	-0.00167308014053873	0	0.0011395882990295	0	0	0.00197612836929887	0	0	0	0	0	0.00395225673859774	0	0	0	-0.000836540070269366	0	-0.000836540070269366	0	0	0.00311571666832837	0	0	-0.000836540070269366	0	-0.000836540070269366	0	0	-0.0050192404216162	0	0	0	0	0	0.00349136951309954
530	0	0	0	0	0	0	0	0	0	0	0	0	0	0	0	0	0	0	0	0	0	0	0	0	0	0	0	0	0	0	0	0	0	-0.00552333609500138	0	0	0	0	0	0	0	0	0	0	0	0	0	0	0
531	0	-0.013051422605064	0	0	0	0	0	0	0	0	0	0	0	0	0	0	0	0	0	0	0	0	0	0	0	-0.00435047420168798	0	0	0	0	0	0	-0.00870094840337597	0	0.0105574324324324	0	-0.00435047420168798	-0.0068444643743195	0	0	0.0285408009810907	0	-0.0031314963162066	0	0	0	-0.00870094840337597	0	-0.00870094840337597
532	0	0	0	0	0	0	0	0	0	0	-0.000419346992862714	-0.000209673496431357	0	0	0	0	0	0	0	-0.000209673496431357	0	0	0	0	0	-0.000419346992862714	0	0	0	0	0	0	0	0	0	0	0	0	0	0	0	0	0.00043205129312952	0	0	0	0	0	0
533	-0.010465724751439	-0.0115125053340546	0	0	0	0	-0.010465724751439	0.0198846689202625	0	0	0.0167443271724157	-0.010465724751439	0	0	0	0	0.039769337840525	0	0	0	-0.0209314495028781	-0.0219782300854936	0	0	-0.0439564601709873	0	0.0470947208441172	0	0	0	0	-0.110940012084801	-0.0209314495028781	0	-0.350604900785283	-0.0313971742543171	0.0198846689202625	0	0	0	0	0	0.0177911077550313	0	0	0	0	0.039769337840525	-0.010465724751439
534	0	0	0	0	0	0	0	0	0	0	0	0	0	-0.00102692599971246	0	0	0	0	0	-0.00102692599971246	0	0	0	0	0	0	-0.00308077799913738	0	0	0	0	0	0	0	0	0	0	0	0	0	0	0	0	0	0	0	0	0	0
535	0	0	0	0	0	0	0	0	0	0	0	0	0	0	0	0	0	0	0	0	0	0	0	0	0	0	0	0	0	0	0	0	0	0	0	0	0	0	0	0	0	0	0	0	0	0	0	0	0
536	0	0	0	0	0	0	0	0	0	0	0	0	0	0	0	0	-0.00412643393579269	0	0	0	0	0	0	0	0	0	0	0	0	0	-0.00206321696789634	0	0.00906248583986588	0.00453124291993294	0	0.00453124291993294	0	0	0	0	0	0	0	0	0.00906248583986588	0	0	0	0
537	0	0	0	-0.159235668789809	0	-0.0796178343949045	0	-0.0796178343949045	0	0	0	0	0.292397660818713	-0.0398089171974522	0.111201127376119	-0.0219608646527859	-0.0398089171974522	-0.026073676760905	-0.0398089171974522	0	-0.105691511155809	0.0974658869395711	-0.0398089171974522	0.115313939484238	0	-0.0398089171974522	0	0	0	0	0.194931773879142	0	-0.0219608646527859	0	0	0.190818961771024	0	-0.0398089171974522	0	0	0.0974658869395711	0	0	-0.30473609714307	0	0	-0.398089171974522	0	0
538	0	0	0	0	0	0	0	0	0	0	0	0	0	0	0	0	0	0	0	0	0	0	0	0	0	0	0	0	0	0	0	0	0	0	0	0	0	0	0	0	0	0	0	0.00391910957830381	0	0	0	0	0
539	0	0	0	0.00699986000279994	0	0	0	0	0	0	0	0.0179405957724028	0	0	0	0	0	0	0	0.00699986000279994	0	0	0	0	0	0	-0.00502942211939848	0	0	0	0	0	0	0	0	0	0	0	0	0	0	0	0	0	0	0	0	0	0
540	0	0	0	0	0	0	0	0	0	0	0	0	0	0	0	0	0	0	0	0	0	0	0	0	0	0	0	0	0	0	0	0	0	0	0	0	0	0	0.0167168171180207	0	0	-0.00846023688663283	0	0	0	0	0	0	0
541	0	0	0	0	0	0	0	0	0	0	0	0	0	0	0	0	0	0	0	0	0	0	0	0	0	0	0	0	0	0	0	0	0	0	-0.00283342305839685	0	0	0	0	-0.00283342305839685	0	0	0	0	-0.00283342305839685	0	0	0	0
542	0	0	0	0	0	0	0	0	0	0	0	0	0	0	0	0	0	0	0	0	0	0	0	0	0	0	0	0	0	0	0	0	0	0	0.00550964187327824	0	0	0	0	0	0	0	0	0	0	0	0	0	0
543	0	0	0	0	0	0	0	0	0	0	0	0	0	0	0	0	0	0	0	0	0	0	0	0	0	0	0	0	0	0	0	0	0	0	0	0	0	0	0	0	0	0	0	0	0	0	0	0	0
544	0	0	0	0	-0.000291303144617446	0	0	0	-0.000291303144617446	0	0	0	0	0	0	0	0	0	0	0	0	0	0	0	0	0	0	0	0	0	0	0	0	0	0	0	0	0	0	0	0	0	0	0	-0.000873909433852338	0	0	0	0
545	0.0100017256662438	0	-0.00604448742746615	-0.00302224371373308	0	0	0	0	0	0	0	0	0	0	0	0	0	0	0	0	0	0	0.0039572382387776	0	0	0	0	0	0	0	0	0	0	0	0	0	0	0	0	0	0	0	0	0	0	0	0	0	0
546	0	0	0	0	0	0	0	0	0	0	0	0	0	0	0	0	0	0	0	0	-0.000965605144744211	0	0	0	0	0	0	0	0	0	0	0	0	-0.000965605144744211	0	0	0	0	0	0	0	0	0	0	0	0	0	0	0
547	0	0	0	0	0	0	0	0	0	0	0	0	0	0	0	0	0	0	0	0	0	0	0	0	0	0	0	0	0	0	0	0	0	0	0	0	0	0	0	0	0	0	0	0	0	0	0	0	0
548	0	0	0	0	0	0	0	0	0	0	0	0	0	0	0	0	0	0	0	0	0	0	0	0	0	0	0	0	0	0	0	0	0	0	0	0	0	0	0	0	0	0	0	0	0	0	0	0	0
549	0	0	0	0	0	0	0	0	0	0	0	0	0	0	0	0	0	0	0	0	0	0	0	0	0	0	-0.000213882011988087	0	0	0	0	0.000364703951567315	0	0	0	0	0	0	0	0	-0.000106941005994043	0	0	0	0	0	0	0	0
550	0	0	0	0	0	0	0	0	0	0	0	0	0	0	0	0	0	0	0	0	0	0	0	0	0	0	0	0	0	0	0	0	0	0	0	0	0	0	0	0	0	0	0	0	0	0	0	0	0
551	0	0	0	0	0	0	0.00450868135817251	0	0	0	0	0	0	0	0	0	0	0	0	0	0	0	0	0	0	0	0	0	0	0	0	0	0	0	0	0	0	0	0	0	0	0	0	0	0	0	0	0	0
552	0	0	0	-0.00146993973247097	0	0	0	0.00506344586794717	0	0	0	0	0	0	0	0	0	0	-0.00146993973247097	0	0	0	0	0	0.00980007840062721	0	0	0	-0.00408300586214577	0	0	0.00833013866815624	0	0	0.00032681333526713	0	0.0017967530677381	0	0	0	0	0	0	0	0	0	0	0	0
553	0.00649266329048176	0	0	0	-0.0055755345543754	0	0	-0.0027877672771877	0	0	0	0	0	0	0	0	0.00649266329048176	-0.0027877672771877	0	0	0	0	0	0	0	0	0	0	-0.0027877672771877	0	0	0	0	0	0	0	0	0	0	0	0	0	0	-0.0027877672771877	0	0	0	0	-0.0027877672771877
554	0	0	0	0	-0.0276701715550636	0.0190971985498981	0.0849617672047579	0.0566411781365052	0.105359800781034	-0.0177963635235201	0	-0.0177963635235201	-0.0184467810367091	0.000650417513189002	-0.0368935620734182	0.11328235627301	0	-0.0184467810367091	-0.00922339051835455	0	-0.00922339051835455	0	0	0	0	-0.00922339051835455	0	0.0381943970997961	0	0	0	-0.00922339051835455	0	-0.0184467810367091	-0.0276701715550636	0	-0.00922339051835455	0	0	-0.0184467810367091	0	-0.00922339051835455	0	-0.00922339051835455	0	0.0381943970997961	0	0	0
555	0	0	0	0	0	0	0	0	0	0	0	0	0	0	0	0	0	0	0	0	0	0	0	0	0	0.0701754385964912	0	0	0	0	0	0	0	0	0	0	0	0	0	0	0	0	0	0	0	0	0	0	0
556	0	0	0	0	0	0	0	0	0	0	0	0	0.0111226457066588	0	0	0	0	0	0	0	0	0	0	0	0	0	0	0	0	0	0	0	0	0	0	0	0	0	0	0	0	0	0	0	0	0	0	0	0
557	0	0	0	0	0	0	0	0	0	0	0	0	0	0	0	0	0	0	0	0	0	0	0	0	0	0	0	0	0	0	0	0	0	0	0	0	0	0	0	0	0	0	0	0	0	0	0	0	0
558	0	0	0	0	0	0	0	0	0	0	0	0	0	-0.00909090909090909	0	0	0	0	0	0.0171232876712329	0.0342465753424658	0	0.0765255292652553	0	0	0.198069738480698	0	-0.00909090909090909	0	0	0.0342465753424658	0	0	0	-0.0181818181818182	0	0.0059153175591531	0	0	0	-0.00909090909090909	-0.0748443337484432	0	0	-0.0496886674968865	0	0	0	0
559	0	0	-0.0106674252391281	0	0	0	0	0	0	0	0	0	0	0	0	0	0	0	0	0	0	0	0	0	0	0	0	0	0	0	0	0	0	0	0	0	0	0	0	0	0	0	0	0	0	0	0	0	0
560	0	0	0	0	0	0	0	0	0	0	0	0	0	0	0	0	0	0	0	0	0	0	0	0	0	0	0	0	0	0	0	0	0	0	0	0	0	0	0	0	-0.000184552239356872	0	0	0	0	0	0	-0.000184552239356872	0
561	0	0	0	0	0	0	0	0	0	0	0	0	0	0	0	0	0	0	0.0539083557951483	0	0	-0.0190367409099562	0	0	0	0	0	0	0	0.0539083557951483	0	0	0.0348716148851921	0	0	0	0	0	0	0	0	0	0	0	0.0126330070405159	-0.0380734818199124	0	-0.0571102227298686	0
562	0	-0.00071286175406932	-0.00288500375050488	-0.0266778955086132	0.00940142973981155	-0.0382179105106327	-0.0071957310091484	-0.0144250187525244	-0.00577000750100975	-0.00288500375050488	0	-0.0144250187525244	0.00505714574694043	-0.0115400150020195	0	0	-0.00288500375050488	0	-0.00577000750100975	0.00505714574694043	-0.00288500375050488	0	-0.00288500375050488	0	0	0	0	0	0	-0.00288500375050488	0	0.00217214199643555	0	0.00505714574694043	-0.00288500375050488	0	0	0	0	0	0	0	0	0	0	0	0	0	0
563	0	0	0	0	0	0	0	0	0	0	0	0	0	0	0	0	0	0	0	0	0	0	0	0	0	0	0	0	0	0	0	0	0	0	0	0	0	0	0	0	0	0	0	0	0	0	0	0	0
564	0	0	0	0	0	0	0	0	0	0	0	0	0	0	-0.00308908933646361	0	0	0	0	0	0	0	0	0	0	0	0	0	0	0	0	0	0	0	0	0	0	0	0	0	0	0	0	0	0	0	0	0	0
565	0	0	0	0	0	0	0	0	0	0	0	0	0	0	0	0	0	0	0	0	0	0	0	0	0	0	0	0	0	0	0	0	0	0	0	0	0	0	0	0	0	0	0	0	0	0	0	0	0
566	-0.0114508348263438	0	-0.00111795548301267	0	-0.00223591096602533	-0.00111795548301267	0.00282685512367491	0	0.00170889964066224	0	-0.000463078493076599	-0.00111795548301267	-0.00894364386410133	-0.0144694884468782	0.0068995313949355	0	0	0	0	-0.0122975103131393	0.00170889964066224	0	0	0	0	0	0	0	0	0.00282685512367491	0	0	0	0	0	0	0	0	0	0	0	0	0	0	0	0	0	0	0
567	-0.0203873598369011	0.0393236335037357	0.117970900511207	0.0786472670074715	-0.0203873598369011	0	0	0	0.0393236335037357	0	0	0	0	0	-0.0203873598369011	0	-0.0014510861700665	0	0	0	0	0	0	0	0	0	0	0	0	0	0	0	0	0	0	0	0	0	0	0.0393236335037357	0	0	0	0	0	0	0	0	0
568	0	0	0	0	0	0	0	0	0	0	0	0	0	0	0	0	0	0	0	0	0	0	0	0	0	0	0	0	-0.011750073941326	0	0	0	0	0	0	-0.00529801324503311	0	0	0	-0.0105960264900662	0	0	0	0	0	0	0	0	0
569	0	0	0	0	0	0	0	0	0	-0.0195026816187226	0	0	0	0	-0.0292540224280839	0	-0.0195026816187226	0	0	0	-0.0195026816187226	0	0	0	0	0	0	0	0	0	0.0191754554170662	0	0	0	-0.0195026816187226	0	0	0	-0.0195026816187226	0	0	0	0	-0.00975134080936129	0	0	0	0	0
570	0	0	0	0	0	0	0	0	0	0	0	0	0	0	0	0	0	0	0	0	0	0	0	0	0	0	0	0	0	0	0	0	0	0	0	0	0	0	0	0	0	0	0	0	0	0	0	0	0
571	0	0	0	0	0	0	0	0	0	0	0	0	0	0	0	0	0	0	0	0	0	0	0	0	0	0	0	0	0	0	0	0	0	0	0	0	0	0	0	0	0	0	0	0	0	0	0	0	0
572	-0.194552529182879	-0.0648508430609598	-0.12970168612192	0	-0.0648508430609598	0	0.0353495577406432	0	0	-0.0648508430609598	0	0	-0.12970168612192	-0.0648508430609598	0	-0.194552529182879	0.400801603206413	-0.194552529182879	0	0	0	0.100200400801603	0	0	-0.259403372243839	0	-0.0648508430609598	0	0	0	0	0	0	0	0	0	0	0	0	0	-0.194552529182879	0.100200400801603	0	0	0	0	0	0	0
573	0	0	-0.00789265982636148	0	0	-0.015785319652723	0	0	0	0	0	0	0	0	0	-0.00789265982636148	0	0	0	0	0	0	0	0	0	0	0	0	0	0	0	0	0	0	0	0	0	0	0	0	0	0	0	0	0	0.00574990497582132	0	-0.0337133941559861	0.0272851296043656
574	0	0	0	0	-0.00204056646124964	0	0	0	0	0	0	0	-0.00204056646124964	0.00401493556028426	-0.00204056646124964	0.0120448066808528	0	-0.00408113292249929	0	0	0	-0.00204056646124964	0	0	0	0	-0.00204056646124964	0	0	0	0	0	0	0	-0.00408113292249929	0	0	0	0	0	0	0	0	0	0	0	0	0	0
575	0	0	0	0	0	0	0	0	0	0	0	0	0	0	0	0	0	0	0	0	0	0	0	0	0	0.00255212719801955	0	0	0	0	0	0	0	0.0051042543960391	0	0.0140647288422121	0	0	0	0	0	0	0.00516031290224825	0	0	0	0.0524587538249236	0.00255212719801955	0
576	0	0	0	0.00205909605683105	0	0	0.00102954802841553	0	0	0	0	-0.000587236991232552	0.00102954802841553	0	0	0.000442311037182978	0	-0.000587236991232552	-0.00014492595404957	0	0	0	0	0	0	-0.000587236991232552	0	0	0	0	0	0.0041181921136621	0.00764914723609165	0.0726631321553536	0.0892808265640516	0.00308864408524658	0	0	0	0.125337607083697	0.00353095512242955	0	0	0.165200128283804	0.00617728817049315	0.00205909605683105	0.0463597939788357	0.00205909605683105	0.000312451433201919
577	0	0	0	0.00280764803324255	0	0	0	0	0	0	0	0	0	0	0	0.00421147204986383	0	0	0	0	0	-0.00209948405179427	0	0	0	0	0	0	0	0	0	0	0	0	0	0	0	0	0	-0.000524871012948568	0	0	0	0	-0.00104974202589714	0	0	-0.0015746130388457	0
578	-0.051581459081956	0.0190473393950902	-0.0171544241259821	0	0	-0.0093461968410352	0.0415847533676291	-0.00343088482519642	0	0.0212360106249654	0.00561955605507165	-0.202658770895103	-0.0202303632381587	-0.00774903753269431	0.00437734245975046	0.00561955605507165	-0.00343088482519642	0.0031351288644292	-0.00343088482519642	0	-0.00343088482519642	-0.0115348680709105	0	-0.0121263799924448	0.00561955605507165	-0.00343088482519642	0	0	-0.0252584073716961	0	0	-0.00343088482519642	0	0	0	0	-0.00343088482519642	-0.0102926544755893	0	0.0168586681652149	-0.00686176965039284	-0.00343088482519642	0.00561955605507165	0.00999689851482206	0.0280977802753582	0.0112391121101433	0	-0.00686176965039284	0
579	0	0	0	0	0	0	0	0	0	0	0	0	0	0	0.00308232900779829	0	0	0	0	0	0	0	0	0	0	0	0	0	0.00080509903034287	0	0	0	0	0	0	0	0.00388742803814116	0	0	0	0	-0.00341584496618313	0	0	0	0	0	0	0
580	0	0	0	0	0	0	0	0	0	0	0	0	0	0	0	0	0	0	0	0	0	0	0	0	0	0	0	0	0	0	0	0	0	0	0	0.0729660707770887	0	0	0	0	0	0	0	0	0.48988692398797	0.0729660707770887	0	0	0
581	-0.0534302201325069	0	0	0	-0.330269028701576	-0.0106860440265014	0	0	0.0272142781262369	0	0	0	0	0	0	0	0.0379003221527383	0	0	0.0437425122259724	0	0	0	0	0	0	0	0	-0.0106860440265014	0	0	-0.013107971003135	0	0	0	0	-0.0320581320795042	0	0.0058421900732341	0	0.0189501610763692	0	0	0	0	0	0	-0.0534302201325069	0
582	0	0	0	0	0	0	0	0	0	0	0	0	0	0	0	0	0	0	0	0	0	0	0	0	0	-0.000579119275405963	0	0	0	0	0	0	0	0	0	0	0	0	0	0	0	0	0	0	0	0	0	0	0
583	0	0	0	0	0	0	0	0	0	0	0	0	0	0	0	0	0	0	0	0	0	0	0	0	0	0	0	0	0	0	0	0	0	0	0	0	0	0	0	0	0	0	0	0	0	0	0	0	0
584	0	0	0	0	0	0	0	0	0	0	0	0	0	0	0	0	0	0	0	0	0	0	0	0	0	0	0	0	0	0	0	0	0	0	0	0	0	0	0	0	0	0	0	0	0	0	0	0	0
585	0	0	0	0	0	0	0	0	0	0	0	0	0	0	0	0	0	0	0	0	0	0	0	0	0	0	0	0	0	0	0	0	0	0	0	0	0	0	0	0	0	0	0	0	0	0	0	0	0
586	0	0	0	0	0	0	0	0	0	0	0	0	0	-0.0241390408754425	0	0	0	0	0	0	0	-0.00804634695848085	0	0	0	0	0	0	0	0	-0.00804634695848085	0	0	0	0	0	0	0	0	0	0	0	0	0	0	0	0	0	0
587	0	0	0	0	0	0	0	0	0	0	0	0	0	0	0	0	0	0	0	0	0	0	0	0	0	0	0	0	0	0	0	0	0	0	0	0	0	0	0	0	0	0	0	0	0	0	0	0	0
588	0	0	0	0	0	0	0	0	0	0	0	0	-0.0153539075694764	0	0	0	0	0	0	0	0	0	0	0	0	0	0	0	0	0	0	0	0	0	0	0	0	0	0	0	0	0	0	0	0	0	0	0	0
589	0	0	0	0	0	0	0	0	0	0	0	0	0	0	0	0	0	0	0	0	0	0	0	0	0	0	0	0	0	0	0	0	0	0	0	0	0	0	0	0	0	0	0	0	0	0	0	0	0
590	0	0	0	0	0	0	0	0	0	-0.00244045294806716	0	0	0	0	0	0	0	0	0	0	0.00675072352252108	0	0	0.00459558823529412	0	0	0.00459558823529412	0	0	0	0	0	0	0	0	0	0	0	0	0	0	0	0	0	0	0	0	0	0
591	0	0	-0.0043145191420286	0	0	-0.0142231957284947	0.006836097955788	-0.0660315064616546	0	0	0	-0.00314435745055498	0	0.000694557456672301	0.00255927660481819	0	-0.217877791529078	0.00826291066019136	0	0	0.00442399575296408	0.105590817225401	0	0	0.00884799150592815	0	0	0.00570363405537317	0	0.00442399575296408	0.0613508596957603	0	0	0	0.00442399575296408	0.117179340766959	-0.00943307235166494	0.135498102415611	0.0442399575296408	0	-0.00628871490110996	0	0	0.00442399575296408	0.388103766778306	0.0132719872588922	-0.160294067920669	-0.0194512255490666	-0.00314435745055498
592	0	-0.0115101289134438	-0.00460405156537753	-0.0278029488850387	0	0	0	-0.00230202578268877	0.00336371892764641	0.0145165688555432	0.0134548757105856	0.0201823135658784	0.00212338628991528	0	0.144798265758202	0	0.00442541207260404	0.0153996225077274	0.0081362661741142	0.00778913100025043	0	0	-0.00230202578268877	0.0959400934667843	0.0346988824214217	0.0658554064224235	-1.27409604390106	-0.0085036889713444	0	0	0	0	-0.123962257091329	0.00442541207260404	0.0099125172901657	-0.0161141804788214	0.00672743785529281	0	0	0	0	0.0134548757105856	-0.0200138178847883	0	0.0100911567829392	0.00212338628991528	0	0.130915104380287	0.0030064399420994
593	0	0	0	0	0	0	0	0	0	0	0	0	0	0	0	0	0	0	0	0	0	0	0	0	0	0	0.00335998924803441	0	0	0	0	0	0	0	0	0	0	0	0	0	0	0	0	0	0	0	0.00390956873832613	0.00335998924803441	0
594	0	0	0.00390736929849696	0	0	0	0	0	0	0	0	0	0	0	0	-0.000470871866347729	0	0	0	0	0	0	0	0	0	-0.000470871866347729	0.0130245643283232	0	0	0	0	0	0	0	0	0	0	0	-0.000470871866347729	0	0	0	0	0	0	0	0	0	0
595	0	0	0	0	0	0	0	0	0	0	0	0	0	0	0	0	0	0	0	0	0.02694621499546	0	0.0112340616749986	0	0	0	0	0	0	0	0	0.0021225481387063	0	0	0.0415194291238848	0	0	0	0	0	-0.0069113002749026	0.0534264392548196	0	0.00447809164546276	0	0	0.0122176706216684	0	0
596	0.115473441108545	0	-0.0360880548538434	0	0	0	-0.0721761097076868	-0.0360880548538434	0	0	0	0	0	0	0	0	0	0	0	0	0	0	0	-0.0360880548538434	0	0	0	0	0	0	0	0	0	0	0	0	0	0	0	0	0	0	0	0	0	0	-0.0360880548538434	0	0
597	0	0	0	0	0	0	0	0	0	0	0	0	0	0.0460193281178095	0	0	0	0	0	0	0	0.0460193281178095	0	0	0	0	0	0	0	0	0	0	0	0	0	0	0	0	0	0	0	0	0	0	0	0	0	0	0
598	0	0	0	0	0	0	0	0	0	0	0	0	0	0	0	0	0	0	0	0	0	0	0	0	0	0	0	0	0	0	0	0	0	0	0	0	0	0	0	0	0	0	0	0	0	0	0	0	0
599	0	0	0	0	0	0	0	0	0	0	0	0	0	0	0	0	0	0	0	0	0	0	0	0	0	0	0	0	0	0	0	0	0	0	0	0	0	0	0	0	0	0	0	0	0	0	0	0	0
600	0	0	0	0	0	0	0	0	0	0	0	0	0	0	0	0	0	0	0	0	0	0	0	0	0	0	0	0	0	0	0	0	0	0	0	0	0	0	0	0	0	0	0	0	0	0	0	0	0
601	0	0	-0.0023146540749485	0	0	0	0	-0.0023146540749485	0	0	0	0	0	0	0	0	0	0	0	0	0	0	0	0	0	0	0	0	0	0	0	0	0	0	0	0	0	0	0	0	0	0	0	0	0	0	0	0	0
602	-0.138865115697984	0.0220864399972861	-0.19594817154424	-0.364884192522953	-0.030631579129676	0.494681656286915	0.355070932433781	0.157854639932759	-0.124463723536011	-0.0439879456883749	0.110807939529182	0.00768504783531299	-0.039361652568263	-0.269484509711708	0.011043219998644	0.108756049369945	0.116963610006895	-0.00951384264104272	0	0.0308546744831842	-0.0285415279231282	-0.247359908667111	0.248366773223074	0.0226089527989241	-0.078946400490035	-0.00309691576251203	-0.112636734334912	-0.012610758403555	0.184083021295831	-0.0190276852820854	0	-0.0190276852820854	0.044994810244339	0.246837395865474	-0.046039835847613	0.280750825063862	-0.43353298116949	0.124948075290337	-0.0285415279231282	0.0118269892010988	0	0	-0.00951384264104272	0.0617093489663684	-0.0285415279231282	-0.161735324897726	-0.000261256400817991	-0.00746195248180498	-0.168936020978713
603	0	0	0	0	0	0	0	0	0	0	0	0	0	0	0	0	0	0	0	0	0	0	0	0	0	0	0	0	0	0	0	0	0	0	0	0	0	0	0	0	0	0	0.0472813238770686	0	0	0	0	0	0
604	0	0	0	0	0	0	0	0	0	0	0	0	0	0	0	0	0	0	0	0	0	0	0	0	0	0	0	0	0	0	0	0	0	0	0	0	0	0	0	0	0	0	0	0	0	0	0	0	0
605	0	0	0	0	0	0	0	0	0	0	0	0	0	0	0	0	0	0	0	0	0	0	0	0	0	0	0	0	0	0	0	0	0	0	0	0	0	0	0	0	0	0	0	0	0	0	0	0	0
606	0	0	0	0	0	0	0	0	0	0	0	0	0	0	0	0	0	0	0	0	0	0	0	0	0	0	0	0	0	0	0	0	0	0	0	0	0	0.104347826086957	0	0	0	0	0	0	0	0	0.0347826086956522	0	0
607	-0.153982427571892	-0.0095735733586243	-0.076141223627937	-0.0259470679813181	-0.0372206216559598	-0.0304207003918898	-0.0908147379346134	-0.132508992001145	-0.1352826440957	0.0310470089293702	-0.0287207200758723	-0.0908147379346134	-0.0355206413399424	0.0180734749387112	0.0586940572267058	-0.106561924019827	-0.0355206413399424	-0.0891147576185956	-0.174829554605157	-0.283091458941002	-0.172950628992717	-0.246497145822522	-0.294365012615644	0.77823309414312	-0.092962081491688	1.36409999463164	0.565198718751677	-1.72861156344505	-0.16445072741263	1.76395325948857	-0.301612297120771	-0.208650215629082	-0.340532899092748	-0.389206019719772	-0.256518082422203	-0.291412415224666	-0.06701501351037	-0.129735339906591	-0.178229515237192	0.018699783476191	-0.13590895263318	-0.100388311293238	-0.0597677290052427	0.18798203389224	0	-0.0355206413399424	0.21222912155754	0.0542204248161337	0
608	0	0	0	0	0	0	0	0	0	0	0	0	0	0	0	0	0	0	0	0	0	0	0	0	0	0	0	0	0	0	0	0	0	0	0	0	0	0	0	0	0	0	0	0	0	0	0	0	0
609	0	0.0059117111815794	-0.0276243093922652	-0.0138121546961326	-0.0276243093922652	0.0453594429370035	0	-0.0276243093922652	0.019723865877712	0	0.0788954635108481	0	-0.0079004435145532	0	-0.0138121546961326	0	0.0256355770592915	0	0	0	0.019723865877712	0	0	-0.0828729281767956	0.0453594429370035	0	0.0788954635108481	0	0.019723865877712	0	0	0	0	-0.0138121546961326	0	0	0	0	0	0	0	-0.0138121546961326	0	0	0	0	0	0	0
610	0	0	0	0	0	0	0	0	0	-0.00181633246149375	0	0	0	-0.00181633246149375	0	0	0	0	0	0	0	0	0	0	0	0	0	0	0	0	0	0	0	0	0	-0.0044554666669462	-0.00181633246149375	0	0	6.20956698459399e-05	0	0.00018628700953782	0	0	0	0.00569738006386503	0	0	-0.0108358990991166
611	0	0	0	0	0.00538793103448276	0	0	0	0.0107758620689655	0	0	0	0	0	0	0	0	0	0	0	0	0	0	0	0	0	0	0	0	0	0	0	0	0	0	0	0	0	0	0	0	0	0	0	0	0	0	0	0
612	-0.0545851528384279	-0.300218340611354	-0.163755458515284	0.117990044112581	-0.109170305676856	0.227160349789437	-0.327510917030568	0.254452926208651	0.481613275998089	0	-0.0545851528384279	-0.245633187772926	-0.218340611353712	-0.27292576419214	-0.13646288209607	-0.382096069868996	-0.0545851528384279	0	0.090697467693367	-0.13646288209607	2.37112070402347	0.653355111837063	0.199867773370223	-0.0818777292576419	-0.0545851528384279	-0.109170305676856	-0.13646288209607	0.399735546740447	1.78999022189628	-0.191048034934498	-0.027292576419214	0.690300787804042	0.345150393902019	-0.354803493449782	0.47196017645033	-0.27292576419214	-0.300218340611354	-0.846069868995633	-0.354803493449782	-0.13646288209607	-0.354803493449782	0.826763669900112	-0.027292576419214	-0.13646288209607	-0.163755458515284	-0.0818777292576419	-0.13646288209607	-0.0545851528384279	-0.27292576419214
613	-0.0290951411114344	0	0	0	0	0	0.0585137507314219	0	0.117027501462844	0	-0.0872854233343032	-0.0581902822228688	-0.0290951411114344	0	0	0	0	0.0585137507314219	0	-0.0581902822228688	0	0	0	0	0	0.0879323603514096	0	0.0585137507314219	0	0	0	0.0879323603514096	0.0585137507314219	0	0	0	0	0	0	-0.0290951411114344	0	0.0585137507314219	0	0	0	0	-0.0290951411114344	0	0
614	0	0	0	0	0	0	0	0	0	0	0	0	0	0	0	0	0	0	0	0	0	0	0	0	0	0	0	0	0	0	0	0	0	0	0	0	0	0	0	0	0	0	0	-0.0122883110739085	0	0	0	0	0
615	0	0	0	0	0	0	0	0	0	0	0	0	0	-0.0015890353879047	0	0	0	0	0	0	0	0.0343958026969822	0	0.0401485496336445	0	0	0	0	0	0	0	0	0	-0.0115054938733245	0	0	0	0	0	0	0	0	0	0	0	0	0.00428439047174884	0	0
616	0	0	0	0	0	0	0	0	0	0	0	0	0	0	0	0	0	0	0	0	0	0	0	0	0	0	0	0	0	0	0	0	0	0	0	0	0	0	0	0	0	0	0	0	0	0	0	0	0
617	0	0	0	0	0	0	0	0	0	0	0	0	0	0	0	0	0	0.0362581580855693	0	0	0	0	0	0	0	0	0	0	0	0	0	0	0	0	0	0	0	0	-0.109529025191676	0	0.0362581580855693	0	0	0	0	0	0	0	0
618	0	0	0	0	0	0	0	0	0	0	0	0	0	0	0	0	0	0	0	-0.000224082605811806	0	0	0	0	0	0	0	0	0	0	0	0	0	0	0	0	0	0	0	0	0	0	0	0	0	0	0	0	0
619	0	0	0	0	0	0	0	0	0	0	0	0	0	0	0	0	0	0	0	0	0	0	0	0	0	0	0	0	0	0	0	0	0	0	0	0	0	0	0	0	0	0	0	0	0	0	0	0	0
620	0	0	0	0	0	0	0	0	0	-0.0568343279340722	0.124254591758155	-0.284171639670361	-0.0568343279340722	-0.0373327780055486	0	-0.198920147769253	0.0763358778625954	0.010585935890011	-0.170502983802217	-0.255754475703325	0.0763358778625954	-0.113668655868144	0.0763358778625954	0	-0.0284171639670361	0	0	0	0.0479187138955593	0	0	-0.0284171639670361	0	0	0	-0.0284171639670361	0	-0.0284171639670361	0	-0.0284171639670361	0	0	0	-0.0852514919011083	0	0	0	0.0763358778625954	0
621	0	0	0	0	0	0	0	0	0	0	0	0	0	0	0	0	0	0	0	0	0	0	0	0	0	0	0	0	0	0	0	0	0	0	0	0	0	0	0	0	0	0	0	0	0	0	0	0	0
622	0	0	0	0	0	0	0	0	0	0	0	0	0	0	0	0	0	0	0	0	0	0	0	0	0	0	0	0	0	0	0	0	0	0	0	0	0	0	0	0	0	0	0	0	0	0	0	0	0
623	0	0	0	0	0	0	0	0	0	0	0	0	0	0	0	0	0	0	0	0.0327011118378025	0.0573024342701295	0.0327011118378025	0	-0.00809978940547546	0	0	0	0	0	0	0	0.0165015330268516	0.065402223675605	0	0	0	0	-0.0323991576219018	0	0	0	0	0	0	-0.0161995788109509	0	0	0	0
624	0	0	0	0	0	0	0	0	0	0	0	0	0	0	0	0	0	0	0	0	0	0	0	0	0	0	0	0	0	0	0	0	0	0	0	0	0	0	0	0	0	0	0	0	0	0	0	0	0
625	0.0143225436837582	0	0	0	0	0	0	0	-0.0101739749720216	0	-0.0101739749720216	0	0	0	0	0	0	0	0	0	0	0	0	0	0	0	0.00923555619774742	0	0	0	0	0.0143225436837582	0	0	0	0	0	0	0	0	0	0	0	0	0	0	0	0	0
626	0	0	0	0	0	0	0	0	0	0	-0.0149186931224825	0	-0.00994579541498831	0	0	0	-0.00497289770749416	0	-0.00994579541498831	-0.00497289770749416	0	0	0	0	0	0	0	0	0	0	0	0	0	0	0	0	0	0	0	0	0	0	0	0	0	0	0	0	0
627	0	0	0	0	0	0	0	0	0	0	0	0	0	0	0	0	0	0	0	0	0	0	0	0	0	0	0	0	0	0	0	0	0	0	0	0	0	0	0	0	0	0	0	0	0	0	0	0	0
628	0	0	0	0	0	0	0	0	0	0	0	0	0	0	0	0	0	0	0	0	0	0	0	0	0	0	0	0	0	0	0	0	0	0	0	0	0	0	0	0	0	0	0	0	0	0	0	0	0
629	0	-0.0188982330152131	0	0	0	0	0	0	0	0	0	0	0	0	0	0	0	0	0	0	0	0	0	0	0	0	0	0	0	0	0	0	0	0	0	0	0	0	-0.00944911650760654	0	0	0	0	0	0	-0.0283473495228196	0	0	0
630	0	0	0	0	0	0	0	0	0	0	0	0	0	0	0	0	0	0	0	0	0	0	0	0	0	0	0	0	0	0	0	0	0	0	0	0	0	0	0	0	0	0	0	0	0	0	0	0	0
631	-0.00305029943772814	-0.000701027173719291	0.0105623389243314	7.89348263808597e-05	-0.00101676647924271	-0.00203353295848542	0	0	0	0.00320816909048985	0	0	0	-0.00101676647924271	0.00422493556973256	0	0	-0.00688056087555646	0	0.0032871039168707	0	0	0	-0.00203353295848542	0.00211246778486628	0	0	-0.00101676647924271	0	-0.00101676647924271	0.00211246778486628	0	-0.00101676647924271	7.89348263808597e-05	-0.00406706591697085	0	0	0	0.00211246778486628	0	0	-0.00101676647924271	0	0	0	0	0	0	-0.00305029943772814
632	0	0	0	0	0	0	0	0	0	0	0	0	0	0	0.0234907211651398	0	0	0	0	0	0	0	0	0	0	0	0	0	-0.0508130081300813	0	0	0	0	0	0	0	0	0	0	0	0	0	0	0	0	0	0	0	0
633	-0.0186462800671266	-0.0466157001678165	-0.0186462800671266	-0.0652619802349431	0.056661588700935	-0.0093231400335633	0.0041629051131584	0	-0.0186462800671266	-0.0127632966471665	0	0.0846310088016249	-0.0372925601342532	-0.0186462800671266	-0.0093231400335633	0.03385240352065	-0.0093231400335633	-0.0559388402013798	0	0	-0.0093231400335633	0	-0.0186462800671266	-0.0652619802349431	-0.0279694201006899	-0.0093231400335633	-0.093231400335633	0.10155721056195	0	-0.0186462800671266	-0.0093231400335633	-0.0279694201006899	0.0677048070412999	0.0414554652474116	0.016926201760325	-0.0093231400335633	0	0	-0.0186462800671266	-0.0466157001678165	-0.0186462800671266	0	-0.0186462800671266	0	-0.0186462800671266	0	0	0	0.0507786052809749
634	0	0	0	0	0	0	0	0	0	0	0	0	0	0	0	0	0	-0.00101166449158801	0	0	0	0	0	0	0	0.00345113197128658	0	0	0	0	0	0	0	0	0	0.0260018652836391	0	0	0	0	0	0	0.0221345948158301	0.00690226394257316	0	0.0172556598564329	-0.0017865779851964	0.038378590180675	0.0103533959138597
635	0	0	0	0	0	0	0	0	0	0	0	0	0	0	0	0	0	0	0	0	0	0	0	0	0	0	0	0	0	0	0	0	0	0	0	0	0	0	0	0	0	0	0	0	0	0	0	0	0
636	0	0	0	0	0	0	0	0	0	0	0	0	0	0	0	0	0	0	0	0	0	0	0	0	0	0	0	0	0	0	0	0	0	0	0	0	0	0	0	0	0	0.00350360871697849	0	0	0	0	0	0	0
637	0	0	0	0	0	0	0	0	0	0	0	0	0	0	0	0	0	0	0.0145169485374174	0	0	0	0	0	0	0	0	-0.00265005962634159	0	0	0	0	0	0	0	0	0	0	0	0	0	0	0	0	0	0	0	0	0
638	0	0	0	0	0	0	0	0	0	0	0	0	0	0	0	0	0	0	0	0	0	0	0	0	0	0	0	0	0	0	0	0	0	0	0	0	0	0	0	0	0	0	0	0	0	0	0	0	0
639	0	0	0	0	0	0	0.00119736277848218	0	-0.00477304185957711	0.0107434464976364	0	0	0	-0.00954608371915422	0	0.0346250650498738	-0.00477304185957711	0.0609014091590757	0	0	0	-0.00954608371915422	0	0	0	0	0	0	0.0107434464976364	0	0	0	0	0	0	0	0.00597040463805929	0.0405954696879332	0.211326069380338	0.0119408092761187	0	0	0.0238816185522374	0	0	0	-0.147947888392538	0	0
640	-0.00982994200334218	-0.0196598840066844	-0.00982994200334218	-0.0196598840066844	-0.0294898260100265	0	-0.00982994200334218	0	0	0	0	-0.00982994200334218	-0.0294898260100265	0	0	0	0	0	0	-0.0196598840066844	0	-0.00982994200334218	0	0	0	-0.0196598840066844	0	0.0153233220962305	0	0	0.00549338009288832	0	0	0	-0.0196598840066844	0	0	0	0	0	0	0	0	0	0	0	0	0	0
641	0	0	0	0	0	0	0	0	0	0	0	0	0	0	0	0	0	0	0	0	0	0	0	0	0	0	0	0	0	0	0	0	0	0	0	0	0	0	0	0	0	0	0	0	0	0	0	0	0
642	0	0	0	0	0	0	0	-0.00888967908258512	0	0	-0.0266690372477554	0	0	-0.00888967908258512	0	0	0	0	0	-0.00888967908258512	0	0	0	0	0.0189861401177141	0	0	0	0	0	0	0	0	-0.00888967908258512	0	0	0	0	0	0	0	-0.0177793581651702	-0.0444483954129256	0	0	-0.0177793581651702	-0.00888967908258512	0	0.0189861401177141
643	0	0	0	0	0	0	0	0	0	0	0	0	0	0	0	0	0	0	0	0	0	0	0	0	0.0231722859460086	0	0	0	0	0	0	0	0	0	-0.00602954476936991	0	0	0	0	0	0	0	0	0	0	0	0	-0.00602954476936991	0
644	0	0	0	0	0	0	0	0	0	0	0	0	0	0	0	0	0	0	0	0	0	0	0	0	0	0	0	0	0	0	0	0	0	0	0	0	0	0	0	0	0	0	0	0	0	0	0	0	0
645	0	0	0	0	0	0	0	0	0	0	0	0	0	0	0	0	0	0	0	0	0	0	0	0	0	0	0	0	0	0	0	0	0	0	0	0	0	0	0	0	0	0	0	0	0	0	0	0	0
646	0	0	0	0	0	0	0	0	0	0	0	0	0	-0.00435938794193295	0	0	0	0	0	0	0	0	0	0	0	0	-0.00435938794193295	0	0	0	0.00867904877625412	0	-0.00435938794193295	0	0	0	0	0	0	0	0	0	0	0	0	0	0	0	0
647	0	0	0	0	0	0	0	0	0	0	0	0	0	0	0	0	0	0	0	0	0	0	0	0	0	0	0	0	0	0	0	0	0	0	0	0	0	0	0	0	0	0	0	0	0	0	0	0	0
648	0	0	0.00475443350924737	0	0	-0.00174425703371649	0	0	0	0	0	0	0.00475443350924737	0	0	0	0	0.00475443350924737	0	-0.00174425703371649	0	0	0	0	0	0.0142633005277421	0	0	0	0	0	0	0	0	0	0	0	0	0	0	0	0	0	0	0	0	0	0	0
649	0	0	0	0	0	0	0	0	0	0	0	0	0	0	0	0	0	0	0	0	0	-0.0149009089554463	-0.00745045447772314	0	0	0	0	0	0	0	0	0	0	0	0	0	0	0	0	0	0	0	0	0	0	0.0103874519580347	0	0	0
650	0	0	0	0	0	0	0	0	0	0	0	0	0	0	0	0	0	0	0	0	0	0	0	0	0	0	0	0	0	0	0	0	0	0	0	0	0	0	0	0	0	0	0	0	0	0	0	0	0
651	0	-0.00717154331612163	0	0	0	0.0432245515452777	0	-0.0286861732644865	0	0	-0.00717154331612163	0	-0.0143430866322433	0	0	-0.00717154331612163	0.0864491030905554	-0.00717154331612163	-0.0143430866322433	0	0	0	0.0360530082291561	-0.0502008032128514	0	0	-0.0143430866322433	0	0	0.0072691891403956	0	0	0	-0.00717154331612163	0	-0.0143430866322433	0	-0.0143430866322433	-0.0215146299483649	0	0	0.0432245515452777	0.0216122757726389	-0.0143430866322433	0	-0.00717154331612163	-0.0143430866322433	-0.00717154331612163	0
652	-0.571679859278804	-0.034627315290263	-0.002501593119829	-0.697681154840715	0.0617498512210406	0.0558250254109196	-0.0879507475813544	0	-0.066753037460699	-1.33611405158022	-0.0321257221704352	-0.064251444340869	0.205525624213315	-0.433828912096651	-1.24223847818874	0	-2.84062481896366	-0.955608571774653	-0.263852242744063	0	-1.36573818063082	-0.0879507475813544	0	0	-0.0820259217712336	0	0	0.149700598802395	0.0499001996007984	-0.0439753737906772	0	-0.196177565712901	0.0998003992015968	0.199600798403194	-0.0439753737906772	0	0.0499001996007984	0	0	0.023699303240485	0	0	-0.120076469751789	0	0.0499001996007984	-0.0439753737906772	0	0	0.0998003992015968
653	0	0	0	0	0	0	0	0	0	0	0	0	0	0	0	0	0	0	-0.00135924045643295	0	0	0	0	0	0	0	0	0	0	0	0	0	0	0	0	0.00394422958914146	0	0.00231192490867897	0	0	0	0	0	0	0	0	0	0	0
654	0.094368628626016	-0.195192683062852	0.186146494890091	-0.137842585471771	-0.041497788194717	-0.082600167311521	0.073070896207651	-0.014666958901154	-0.0450985533454757	0.036579285030424	-0.048128561711928	-0.057262423737885	0.051773163789286	0.136964093462748	-0.00553309687519798	-0.035964691319519	-0.0223077352071831	0.269317418985919	-0.124185629359434	0.070567807698906	0.232342724877581	-0.691539791422676	-0.04501087949228	-0.158042641248123	0.314547483111188	0.060511616737328	0.157910253729797	0.014403060603035	-0.186981149972517	-0.073905551290076	-0.00289849758665894	-0.769616864647817	-0.15501263288167	-0.056164747095872	-0.243760490779292	0.17762722657504	0.02094616026705	-0.097750209143785	0.099067070418789	0.023932331706905	-0.017653130341009	-0.059194755462325	0.054890846008935	-0.029860837660016	-0.267692822486197	-0.077989399371945	0.150181803570572	0.10095556521663	0.235811979248546
655	0	0	0	0	0	0	0	0	0	0	0	0	0	0	0	0	0	0	0	0	0	0	0	0	0	0	0	0	0	0	0	0	0	0	0	0	0	0	0	0	0	0	0	0	0	0	0	0.0166417041105009	0
656	0	0	0	0	0	0	0	0	0	0	0	0	0	0	0	0	0	-0.00087038262019984	0	0	0	0	0	0	0	0	0	0	0	0	0	0	0	0	0	0	0	0	0	0	0	0	0	0	0	0	0	0	0
657	0	0	0	0	0	0	0	0	0	0	0	0	0	0	0	0	0	0	0	0	0	0	0	0	0	0	0	0	0	0	0	0	0	0	0	0	0	0	0	0	0	0	0	0	0	0	0	0	0
658	0	0	0	0	0	0	0	0	0	0	0	0	0	0	0	0	0	0	0	0	0	0	0	0.0340599455040872	0	0	0	0	0	0	0	0	0	0	0	0	0	0	0	0	0	-0.0115673799884326	0	0	0	0.0340599455040872	0	0	0
659	0	0	0	0	0	0	0	0	0	0	0	0	0	0	0	0	0	0	0	0	0	0	0	0	0	0	0	0	0	-0.0286615075952995	0	0	0	0	0	0	0	0	0	0	0	0	0	0	0	0	0	0	0
660	0	0	0	0	0	0	0	0	-0.131591019939058	0	0	1.86400490629271	-0.0642260757867694	0.244348829685002	0.057948339055732	0.0610872074212506	0	0	0	1.50062053013072	0	1.47864845157209	0.50125313283208	0	0	0	3.30353822900218	0.308574905471772	0.305436037106253	1.85772716956167	1.61651720824219	-0.192678227360308	0.0610872074212506	0	-0.16322115500698	-0.192678227360308	0	0.308574905471772	0	0	0	0.057948339055732	0	-2.26046812599901	0	-0.330546984030404	-0.0642260757867694	0	-0.321130378933847
661	0	0	0	0	0	0	0	0	0	0	0	0	0	0	0	0	0	0	0	0	0	0	0	0	0	0	0	0	0	0	0	0	0	0	0	0	0	0	0	0	0	0	0	0	0	0	0	0	0
662	-0.018450184501845	0	0	0	0	-0.018450184501845	0	0	0.0415454923140839	0	0	-0.018450184501845	0	0	-0.03690036900369	0	0	0	-0.0553505535055351	-0.03690036900369	0.124636476942252	0.198567523689362	-0.0553505535055351	0.332363938512671	0	-0.03690036900369	0.0415454923140839	0.0692859234367169	-0.018450184501845	0	0	0.35545924632491	0	0	0	-0.018450184501845	-0.0553505535055351	-0.03690036900369	0.0415454923140839	-0.0553505535055351	0.0461906156244778	-0.018450184501845	0	0	-0.03690036900369	0.0092902466207877	0.498545907769007	-0.018450184501845	0
663	0	0	0	-0.00202190736631401	0	0	0	0	0	0	0	0	-0.000505476841578503	0	0	0	0	0	0	0	0	0	0	0	0	-0.00151643052473551	0	0	0	0	0	0	0	0	0	0	0	0	0	0	0	0	-0.000505476841578503	0	0.00382672585335987	0	0.00510230113781315	0	0.00127557528445329
664	0	0	-0.0172361787391735	0	0	0	0	0	0	0	0	0	0	0	0	0	0	0	0	0	0	0	0	0	0	0	0	0	0	0	0	0	0	0	0	0	0	0	0	0	0	0	0	0	0	0	0	0	0
665	-0.265392781316348	-0.318471337579618	-0.106157112526539	0	-0.0530785562632696	-0.212314225053079	-0.106157112526539	-0.0530785562632696	0.141843971631206	0	0.0887654153679364	0	0	-0.0530785562632696	0	0.107060577313999	0	0	0	0.141843971631206	-0.0530785562632696	0	0	-0.0530785562632696	0	0	0	-0.282784478474951	-0.106157112526539	0	-0.0530785562632696	-0.211410760265619	0	-0.212314225053079	0	-0.318471337579618	-0.106157112526539	0.266296246103808	0.018295161946063	-0.0530785562632696	0	0.141843971631206	0	-0.106157112526539	0.0887654153679364	0	-0.0530785562632696	0	-0.159235668789809
666	-0.033311125916056	0.0223763705526964	0	0.0671291116580891	0.0447527411053927	-0.016655562958028	-0.0666222518321119	0.0671291116580891	-0.016655562958028	0	0	0	-0.016655562958028	0	-0.033311125916056	-0.016655562958028	-0.033311125916056	0.0671291116580891	-0.033311125916056	0.0223763705526964	0	-0.0499666888740839	0	-0.033311125916056	0	-0.033311125916056	0	0	0	-0.016655562958028	0	0	0	0	0	0	0	-0.016655562958028	-0.033311125916056	0	0.0223763705526964	-0.016655562958028	0	-0.033311125916056	0	0	0	-0.033311125916056	0
667	0	0	0	0	0	0	0	0	0	0	0	0	0	0	0	0	0	0	0	0	0	0	0	0	0	0	0.00532963811757182	0	0	-0.00254013411908149	0	0	0	0	0	0	0	0	0	0	0	0	0.00532963811757182	0	0	0	0	0	0
668	0	0	0	0	0	0	0	0	0	0	0	0	0	0	0	0	0	0	0	0	0	0	0	0	0	0	0	0	0	0	0	0	0	0	0	0	0	0	0	0	0	0	0	0	0	0	0	0	0
669	0	0	-0.0125502008032129	0	0	0	0	0	0	0	0	0	0	0	0	0	0	0	0	0	0	0	0	0	0	0	0	0	0	0	0	0	0	0	0	0	0	0	0	0	0	0	0	0	0	0	0	0	0
670	0	0	0	0	0	0	-0.00292252389163281	0	0	0	0	0	0	0	0	0	0	0	0	0	0	0	0	0	0	0	0	0	0	0	0	0	0	0	0	0	0	0	0	0	0	0	0	0	0	0	0	0	0
671	0	0.0111265173429378	0	0	0	0	0	0	0	0	-0.00230728409589073	0	0	0.00972496232451597	0	0	0.00511039413273452	0.00601612321020335	0	0	0	0	0	-0.00230728409589073	0	0	-0.00230728409589073	0	-0.00461456819178145	-0.00230728409589073	0	-0.0133478786343913	0	0.00370883911431262	0	0	0	0	-0.00692185228767218	0	0	0	0	0	0	0	0	0	0
672	0	0	0	-0.0158579130986362	0	0	0	0	0	0	0	0	0	0	0	0	0	0	0	0	0	0.010285877751037	0	0	0	0	0	0	0	0	0	0	0	0	0	0	0	0	0	-0.0317158261972724	0	0	-0.0158579130986362	0	0	0	0	0	0
673	0	0	0	0	0	0	0	0	0	0	0	0	0	0	0	0	0	0	0	0	0	0	0	0	0	0	0	0	0	0	0	0	0	0	0	0	0	0	0	0	0	0	0	0	0	0	0	0	0
674	0	0	-0.000624617512036602	0	0	0	0	0	-0.00965810314854163	0	0	0	0	0	0	0	-0.00965810314854163	0	0	0	0	-0.0193162062970833	-0.00965810314854163	0.0180669712730102	-0.00965810314854163	0	-0.00965810314854163	0	0	0	-0.0193162062970833	0	0	0	0	0	0	0	0	0	0	0	-0.0193162062970833	0	0	0	0	0	0
675	0	0	0	0	0	0	0	0	0	0	0	0	0	0	0	0	0	0	0	0	0	0	0	0	0	0	0	0	0	0	0	0	0	0	0	0	0	0	0	0	0	0	0	0	0	0	0	0	0
676	0	0	0	0	0	0	0	0	0	0	0	0	0	0	0	0	0	0	0	0	0	0	0.00108354386465167	0	0	-0.00015893843590656	0	0	0.00015410090479085	-0.000417385787596547	-0.000104346446899137	0	0	-0.000263284882805696	-0.000104346446899137	0	0	0	0	-0.000104346446899137	0.000258447351689987	-0.000104346446899137	0	0	0	0	0	0.00129223675844994	0
677	0	-0.00483769532194862	0	-0.00483769532194862	0	0.014082523588227	-0.0145130859658459	0	0	0.00220356647216489	0	-0.00967539064389725	0	0	0	0.0211237853823405	0	-0.00483769532194862	0	0	0	0	0	0	0	0	0	0	-0.00483769532194862	0	0	0	0	0	-0.00483769532194862	0	0	0	0	0	0	0	0	0.00704126179411351	0	0	0	0	0
678	0	0	0	0	0	0	0	0	0	0	0	0	0	0	0	0	0	0	0	0	0	0	0	0	0	0	0	0.0143616257360333	0	0	0	0	0	0	0	0	0	0	0	0	0	0	0	0	0	0	0	0	0
679	0	0	0	0	0	0	0	0	0	0	0	0	0	0	0	0	0	0	0	0	0	0	0	0	-0.00699349604867473	0	0	-0.0139869920973495	0	0	0	-0.00699349604867473	0	0	-0.0209804881460242	0	0	-0.0139869920973495	0	0	0	0	-0.00699349604867473	0	0	0	-0.00699349604867473	-0.0279739841946989	-0.0629414644380726
680	0	0	0	-0.00086617583369424	0	0	0	0	0	0	0	0	0	0	-0.00173235166738848	0	0	0.00065907468870406	0	0	0	0	-0.00259852750108272	0.00305050104479661	0	0	0	0	-0.00259852750108272	0	0	0	0	0	0	0	0.0015252505223983	0	0	0	0	0	0	0.0015252505223983	0	0	0	0	-0.00086617583369424
681	0	0	0	0	0	0	0	-0.0244021473889702	0	0	-0.0244021473889702	0	0	0	0	0	-0.0488042947779405	0	0	0	0	0	0	0	0	0	0	0	0	0	0	0	0	0	0	0	0	0	0	0	0	0	-0.0244021473889702	0	0	0	0	-0.0244021473889702	0
682	0	0	0	0	0	0	0	0	0	0	0	0	0	0	0	0	0	0	0	0	0	0	0	0	0	0	0	0	0	0	0	0	0	0	0	0	0	0	0	0	0	0	0	0	0	0	0	0	0
683	0	0	0	0	0	0	0	0	0	0	0	0	0	0	0	0	0	0	0	0	-0.0499750124937531	0	0	0	0	0	0	0	0	0	0	0	0	0	0	0	0	0	0	0	0	0	0	0	0	0	0	0	0
684	0	0	0	0	0	0	0	0	0	0	0	0	0	0	0	0	0	0	0	0	0	0	0	0	0	0	0	0	0.0145815106445028	0	0	0	0	0	0	0	0	0	0	0	0	0	0	0	0	0	0	0	0
685	-0.00597514340344168	-0.0149378585086042	-0.00896271510516252	0	0	0.00732869182850861	0	-0.00298757170172084	-0.0119502868068834	0	-0.00298757170172084	0	0	0.00732869182850861	0.0366434591425431	-0.0119502868068834	0.00732869182850861	-0.00896271510516252	0.0263271956123136	-0.00597514340344168	0	-0.0149378585086042	-0.00298757170172084	0	0	0	0	0	0	-0.00298757170172084	0	-0.00597514340344168	-0.00140237425793489	-0.0478011472275335	-0.0076579925129636	0.019181326969656	0.012694059695909	-0.066616827825488	0.036545807476807	-0.0282905195734229	0.0138159591022563	-0.0456550000805735	-0.0940170970112809	0.092419419421874	-0.0511180196137091	0.00807246471753301	-0.131453154875717	-0.0242298742982221	0.025156470373098
686	0	-0.000805743338516949	0	0	0	0	0	0	0	0	0	0	4.94477355257605e-06	0	0	0	-0.000268581112838983	0	0	0	0	0	0	0	0	0	0	0	-0.000268581112838983	0	0	0.00540623567164769	0	0	0	0	0.000273525886391559	0	0	0	0	0	0	0	0.000273525886391559	0	0	0.00784324478140884	0
687	0	0	-0.0196309383588536	0	0	0	0	0	0	0	0	0	0	0	0	0	0	0	0	0	0	0	0	0	0	0	0	0	0	0	0	0	0	0	0	0	0	0	0	0	0	0	0	0	0	0	0	0	0
688	0	0	0	0	0	0	0	0	0	0	0	0	0	0	0	0	0	0	0	0	0	0	0	0	0	0	0	0	0	0	0	0	0	0	0	0	0	0	0	0	0	0	0	0	0	0	0	0	0
689	-0.0743731406714832	-0.070783233972811	0.0143596267946891	-0.0670483415597624	-0.116727092483669	-0.123906905881013	-0.0849978750531237	-0.0212494687632809	-0.0531236719082023	-0.0318742031449214	0.0284292821606254	0.0142146410803127	-0.0531236719082023	-0.0671933272741387	-0.0424989375265618	-0.0318742031449214	-0.0531236719082023	0	-0.0070348276829682	-0.0637484062898428	0.0142146410803127	0.000144985714376399	0.0284292821606254	-0.0637484062898428	-0.0212494687632809	0	-0.0424989375265618	0	-0.0106247343816405	0.0142146410803127	-0.0212494687632809	0	-0.0106247343816405	0	-0.0106247343816405	0	0	-0.0424989375265618	0.0284292821606254	0	-0.0106247343816405	0	0	0	-0.0212494687632809	-0.0106247343816405	0	-0.0531236719082023	-0.0106247343816405
690	0	0	0	0	0	0	0	0	0.0272590977238653	0	0	0	0	0	0	-0.132061169339362	-0.021534639745208	0.040888646585798	-0.0612783947352733	-0.0174094707520891	-0.0298941280182901	0.0185543623478207	-0.0037799218901564	0	-0.00870473537604457	0.0159193320533959	-0.0174094707520891	0	0.0136295488619327	0	-0.00870473537604457	0	0	0	0	0	0	0	0	0	0	0	0	0	0	0	0	0	0
691	0.011839924224485	0	0	-0.0117178345441762	0	0	0	0	0.0061030966327055	-0.0117178345441762	0	0	0	-0.0117178345441762	0	0	0	-0.00585891727208812	0	0.011839924224485	-0.00585891727208812	0	0	0	-0.00585891727208812	0	0	0	0	0	0	-0.00585891727208812	0	0	0	0	0	0	0	0	0	0	0	0	0	0	0	0	0
692	0	0	0	0	0	0	0	0	0	0	0	0	0	0	0	0	0	0	0	0	0	0	0	0	0	0	0	0	0	0	0	0	0	0	0	0	0	0	0	0	0	0	0	0	0	0	0	0	0
693	0	0	0	0	0	0	0	0	0	0	0	0.012990387113536	0	0	0	0	-0.00730994152046784	0	0	-0.0146198830409357	0	0	0	-0.00730994152046784	0	0	0	0	0	0	0.012990387113536	-0.043859649122807	0	0	-0.00730994152046784	0	0.012990387113536	0	0	0	0	0	0	0	0	0	0	-0.00730994152046784	0
694	0	0	0	0	0	0	0	0	0	0	0	0	0	0	0	0	0	0	0	0	0	0	0	0	0	0	0	0	0	0	0	0	0	0	0	0	0	0	0	0	0	0	0	0	0	0	0	0	0
695	0	-0.0534188034188034	-0.213675213675214	-0.106837606837607	-0.0534188034188034	0.141043723554302	0	0.0876249201354986	0	0	-0.0534188034188034	0	0.102618350150085	0	0	0	0.141043723554302	-0.0534188034188034	0	0	-0.0534188034188034	0	0	0	-0.286306703796125	-0.106837606837607	0	-0.0534188034188034	-0.217894470362735	0	-0.213675213675214	0	-0.320512820512821	-0.106837606837607	0.262874760406496	0.014993430014587	-0.0534188034188034	0	0.141043723554302	0	-0.106837606837607	0.0876249201354986	0	-0.0534188034188034	0	-0.16025641025641	0	0	0.282087447108604
696	0	0	0	0	0	0	0	0	0	0	0	0	0	0	0	0	0	0	0	0	0	0	0	0	0	0	-0.0037969396666287	0	0	0	0	0	0	0	0	0	0	0	0	0	0	0	0	0	0	0	0	0	0
697	0	-0.000962862397334797	0	0	0	0	0	0	0	0	0	0	0	0	0	0	0	0	0	0	0	0	0	0	0	0	0	0	0	0	0	0	0	0	0	0	0	0.00251092251293125	0	0	0	0	0	0	0	0	0	0	0
698	0	0	-0.00601793344165613	-0.0120358668833123	-0.00601793344165613	0	0	0	0	0	0	0	0	0	0	0	0	0	0	0	0	0	0	0	0	0	0	0	0	0	0	0	0	0	0	0	0	0	0	0	0	0	0	0.0279407655769768	0	0	0	0	0
699	0	0	0	0	0	0	0	0	0	0	0	0	0	0	0	0	0	0	0	-0.00294637595757219	0	-0.00294637595757219	0	-0.00294637595757219	0	0	0	0	0	0	0	0	0	0	0	0	0.00023883187294809	0	0	0	0	0	0	0	0	0	0	0	0
700	0	0	0	0	0	0	0	0	0	0	0	0	0	0	0	0	0	0	0	0	0	0	0	0	0	0	0	0	0	0	0	0	0	0	0	0	0	0	0	0	0	0	0	0	0	0	0	0	0
701	-0.00015582707557769	0.000415225488201368	0	0	0	0	0	0	0	0.00165996181278805	0	0	0	0	0	0	0	-0.00015582707557769	0.000415225488201368	0	0	-0.00015582707557769	0	-0.0006774443208773	-0.00015582707557769	0	0.00129699206311839	0	0	0	0	0	0	0	0	0.000415225488201368	0	0	0	0	0	0	0	0	0	0	0	0	0
702	0	0	0	0	0	0	0	0	0	0	0	0	0	0	0	0	0	0	0	0	0	0	0	0	0	0	0	0	0	0	0	0	0	0	0	0	0.0654878847413229	0	0	0	0	0	0	0	-0.06840421805489	0	0	-0.049480455220188	0
703	0	0	0	0	0	0	0	0	0	0	0	0	0	0	0	0	0	0	0	0	0	0	0	0	0	0	0	0	0	0	0	0	0	0	0	0	0	0	0	0	0	0	0	0	0	0	0	0	0
704	0	0	0	0	0	0	0	0	0	0	0	0	-0.0154475940372287	0	0	0	0	0	0	0	0	0	0	0	0	0	0	0	0	0	0	0	0	0	0	0	0	0	0	0	0	0	0	0	0	0	0	0	0
705	0	0	0	0	0	0	0	0	0	0	0	0	0	0	0	0	0	0	0	0	0	0	0	0	0	0	0	0	0	0	0	0	0	0	0	0	0	0	0	0	-0.00072668609340823	0	0	0	0	0	0	0	0
706	0	0	0	-0.0128998968008256	0	0	0	0	0	0	0	0	0.0231749710312862	0	0	0	0	0.0231749710312862	0	0	0.0231749710312862	0	0	0.0231749710312862	0.0926998841251448	0	0	0.056625016293033	0	0.0231749710312862	0	0	0	0.0231749710312862	-0.0128998968008256	0	0	-0.0257997936016512	0	0.0463499420625724	0	0	0	0	0.0231749710312862	-0.0257997936016512	-0.0128998968008256	0	0.0231749710312862
707	0	0	0	0	0	0	0	0	0	0	0	-0.000966669244451319	0	0	0	0	0	0	0	0	0	0	0	0	0	0	0	0	0	0	0	0.00159359292639497	0	0	0	0	0	0	0	0.00256026217084629	0	0	0	0	0	0.00159359292639497	0	0	0
708	0	0	0	0	0	0	0	0	0	0	0	0	0	0	0	0	0	0	0	0	0	0	0	0	0	0	0	0	0	0	0	0	0	0	0	0	0	0	0	0	0	0	0	0	0	0	0	0	0
709	0	0	0	0	0	0	0	0	0	0	0	0	0	0	0	0	0	0	0.0484966052376334	0	0	0	0	0	0	0.0484966052376334	-0.0216262975778547	0	0	0	0	0	0	0	0	0	0	0	-0.0432525951557093	0	0	0	0	0	0	0	0	0	0
710	0	0	0	0	0	0	0	0	0	0	0	0	0	0	0	0	0	0	0	0	0	0	0	0	0	0	0	0	0	0	0	0	0	0	0	0	0	0	0	0	0	0	0	0	0	0	0	0	0
711	0	0	0	0	0	0	0	0	0	0	0	0	0	0	0	0	0	0	0	0	0	0	0	0	0	0	0	0	0	0	0	0	0	0	0	0	0	0	0	0	0	0	0	0	0	0	0	0	0
712	-0.00354710556186152	0	0	0	0	0	0	0	0	0	0	0	0	0	0	0	0	0	0	0	0	0	0	0	0	0	0	0	0	0	0	0	0	0	0	0	0	0	0	0	0	0	0	0	0	0	0	0	0
713	0	0	0	0	0	0	0	0	0	0	0	0	0	0	0	0	0	0	0	0	0	0	0	0	0	0.0544662309368192	0	0	0	0	0	-0.0336247478143914	0	0	0	0	0	0.108932461873638	-0.0336247478143914	0	0	0.008058218430464	-0.0336247478143914	0	0	0	0.163398692810458	-0.0336247478143914	-0.0672494956287828
714	0	0	0	0	0	0	0	0	-0.0905797101449275	0	0	0	0.15748031496063	0	0	0	0	0	0	0	0	0	0	0	0	0	0	0	0	0	0	0	0	0	0	0.31496062992126	0	0	0	0	0	0	0	0	0	0	0	0	0
715	0	0	0	0	0	0	0	0	0	-0.012298610257041	0	0	0	0	0	0	0	0	0	0	0	0	0	0	0	-0.012298610257041	0	0	0	0	0	0	0	0	0	0	-0.0368958307711229	0	-0.0259386270746754	0	0	0	0	0	0	0.0342130176499357	0	0	0
716	0	0	0	0	0	0	0	0	0	0	0	0	0	0	0	0	0	0	0	0	0	0	-0.0134408602150538	0	0	0	0	0	0	0	0	0	0	0	0	0	0	0	0	0	0	0	0	0.0283687943262411	0	0	0	0	0
717	0	0	0	0	0	0	0	0	0	0	0	0	0	0	0	0	0	0	0	0	0	0	0	0	0	0	0.040133779264214	0	0	0	0	0	0	0	0	0	0	0	0	0	0	0	0	0	0	0	0	0	0
718	0	-0.00660894851629106	0	0	0	0	0	0	-0.0132178970325821	0.0271296798697775	0	0	0	0	0	0	0	0	0	0	0	0	0	0	0	0	0	0	0.0135648399348888	0	0	0	0	0.0406945198046663	0	-0.00660894851629106	0	0	0	0.0135648399348888	0	-0.00660894851629106	0	0	0	0	0	0	0
719	-0.45713178653706	-0.00873555572275658	0	0	-0.00236876490366894	0	0	0.00318339540954382	0.697207039120895	0.0354246647579195	0	0.00318339540954382	0.00636679081908764	0	0.00318339540954382	0	0.00677410607202512	0	0	0.027653992768949	0.0127335816381753	0	0	0	-0.00595947556615018	0.313194695894106	-0.0102896901205505	0.321522936363926	0.226021074077611	0.070034699009964	0.125781681983959	0.117860756767078	0.20814264737916	2.40088115170769	0.105866679020821	0.127818258248646	42.2262563569731	1.40622622057698	0.56809170849948	0.025874478529288	0	0.0191003724572629	0.00359071066248128	0	0	0.119414891164871	0.0417914555770071	0.189042274921898	0.523373919537955
720	0	0	0	0	0	0	0	0	0	0	0	0	0	0	0	0	0	0	0	0	0	0	0	0	0	0	0	0	0	0	0	0	0	0	0	0	0	0	0	0	0	0	0	0	0	0	0	0	0
721	0	0	0	0	0	0	0	0	0	0	0	0	0	0	0	0	0	0	0	0	0	0	0	0	0	0	0	0	0	0	0	0	0	0	0	0	0	0	0	0	0	0	0	0	0	0	0	0	0
722	0	0	0	0	0	0	0	0	0	0	0	-0.00875171387730097	0	0	0	0	0	0	0	0	0	0	0	0	0	0	0	0	0	0	0	0	0	0	0	0	0	0	0	0	0	0	0	0	0	0	0	0	0
723	0	0	0	0	0	0	0	0	0	0	0	0	0	0	0	0	0	0	0	0	0	0	0	0	0	0	0	0	0	0	0	0	0	0	0	0	0	0	0	0	0	0	0	0	0	0	0	0	0
724	0	0	0	0	0	0	0	0	0	0	0	0	0	0	0	0	0	0	0	0	0	0	0	0	0	0	0	0	0	0	0	0	0	0	0	0	0	0	0	0	0	0	0	0	0	0	0	0	0
725	0	-0.00903587241348152	0	0	0	0	0	0	0	-0.00451793620674076	-0.00903587241348152	-0.0271076172404446	0.0198688654877806	0	0	0	0.00993443274389032	-0.00451793620674076	0	-0.00451793620674076	0	-0.0135538086202223	0	0	-0.0225896810337038	-0.00451793620674076	0	0	0	0	0	0	0	0.00993443274389032	0	0	0	0	0	0	0	0	0.00993443274389032	0	0	0	0	0	0
726	0	0	0	0	0	0	0	0	0	0.00264096130991681	0	0	0	0	0	0	0	-0.00261516534382886	0	0	0	0	0	0	0	0	0	0	0	0	0	0	0	0	0	0	0	0	0	0	0	0	0	0	0	0	0	0	0
727	0	0	0	0	0	0	0	0	0	0	0	0	0	0	0	0	0	0.0216169476869866	0	0	0	0	0	0	0	0	0	0	0	0	0	0	0	-0.0155884645362432	0	-0.0155884645362432	0	0	0	0	0	0	0	0	0	0	0.0216169476869866	0	0
728	0	0	0	0	0	0	0	0	0	0	0	0	0	0	0	0	0	0	0	0.00715512306811677	0	0	0	0	0	0	0	0	0	0	0	0	0	0	0	0	0	0	0	0	0	0	0	0	0	0	0	0	0
729	0	0	0	0	0	0	0	0	0	0	0	0	0	0	0	0	0	0	0	0	0	0	0	0	0	0	0	0	0	0	0	0	-0.00452243125904486	0	0	0	0	0	0	0	0	0.0158755357993332	0	0	0	0	0	0	0
730	0	0	0	0	0	0	0	0	0	0	0	0	0	0	0	0	0	0	0	0	0	0	0	0	0	0	0	0	0	0	0	0	0	0	0	0	0	0	0	0	0	0	0	0	0	0	0	0	0
731	0	0	0	0	0	0	0	0	0	0	0	0	0	0	0	0	0	0	0	0	0	0	0	0	0	0	0	0	0	0	0	0	0	0	0	0	0	0	0.0103092783505155	0	0	0	0	0	0	0	0	0	0
732	0.0122935668474301	-0.124431609525938	0.0133368898372899	0	-0.0750310331053292	0.0266737796745799	0	0	0	0	-0.060763974793624	0.0133368898372899	-0.0143802128271498	0	-0.00719010641357492	0	-0.00719010641357492	0	-0.00719010641357492	0.0133368898372899	0	-0.00719010641357492	0	0	0	0	0	0	0	0	-0.00719010641357492	0	0	0	0.0328205630982949	0	0.266737796745799	0.0133368898372899	0	0	0	0.0995050122847451	0.108668610162595	5.50015331477906	0.577546400447462	0.386769805281408	0.0656411261965899	0	0
733	0	0	0	0	0	0	0	0	0	0	0	0	0	0	0	0	0	0	0	0	0	0	0	0	0	0	0	0	0	0	0	0	0	0	0	0	0	0	0	0	0	0	0	0	0	0	0	0	0
734	0	0	0	0	0	0	0	0	0	0	0	0	0	0	0	0	0	0	0	0	0	0	0	0	0	0	0	0	0	0	0	0	0	0	0	0	0	0	0	0	0	0	0	0	0	0	0	0	0
735	0	0	0	0	0	0	0	0	0	0	0	0	0	0	0	0	0	0	0	0	0	0	0	0	0	0	0	0	0	0	0	0	0	0	0	0	0	0	0	0	0	0	0	0	0	0	0	0	0
736	0	0	0	0	0	0	0	0	0	0	0	0	0	0	0	0	0	0	0	0	0.0107014821552785	-0.00263928844783446	0	-0.00263928844783446	0	0	0	0	0	0	-0.00263928844783446	0	-0.00527857689566893	0	0	0	0	0	0	0	0	0	0	0	0	0	0	0	0
737	0	0	0	0	0	0	0	0	0	0	0	0	0	0	0	0	0	0	0	0	0	0	0	0	0	0	0	0	0	0	0	0	0	0	0	0	0	0	0	0	0.0525555117592958	0	0	0	0	0	0	0.0131388779398239	0
738	0	0	0	0	0	0	0	0	0	0	0	0	0	0	0	0	0	0	0	0	0	0	0	0	0	0	0	0	0	0	0	0	0	0	0	0	0	0	0	0	0	0	0	0	0	0	0	0	0
739	0	0	0	0	0	0	0	0	0	0	0	0	0	0	0	0	0	0	0	-0.00163153429485088	0.00824878330446259	0.0165886784391334	0	0.193167308252758	-0.00652613717940351	0.390641231818163	0.0123731749566939	0.00249285735738042	0.00498571471476083	0	0.123690432976283	0.0231148156185369	0.0041243916522313	0.0529379920768937	0.227654145349526	-0.0088367708763675	0.00824878330446259	0.0487224885944542	-0.00163153429485088	0.490090669271652	0.0668515894982303	0.184421649206598	0.0041243916522313	0.001043546722946	-0.20575971684521	0.0392977301461817	0	0.0258810084665419	-0.00489460288455263
740	0	0.00470499670650231	0	0	0	0	0	-0.0090793319104602	0	-0.00231943220299671	-0.0115310287144746	0	-0.0138504609174714	-0.0162360254209769	0	6.61323005088999e-05	-0.034526953842915	0	0	0	0.0142472547205247	0	0	0	-0.00231943220299671	0	0	0	0.0447966671625353	0.00940999341300461	0	0.00470499670650231	0.0188199868260092	0	0	0.0212055513295148	0	0	0	0	-0.00218716760197889	-0.0111342349114213	-0.00927772881198683	-0.00463886440599341	-0.0185554576239737	0.0170296130270837	-0.00231943220299671	0.0025178291045234	-0.00231943220299671
741	0	0	0	0	0	0	0	0	0	0	0	0	0	0	0	0	0	0	0	0	0	0	0	0	0	0	0	0	0	0	0.0126590290524717	0	0	0	0	0	0	0	0	0	0	0	0.00632951452623584	0	0	0	0	0	0
742	0	0	0	0	0	0	0	0	0	0	0	0	0	0	0	0	0	0	0	0	0	0	0	0	0	0	0	0	0	0	0	0	0	0	0	0	0	0	-0.000334226833067066	0	0	0	0	0	0	0	0	0	0
743	0	0	0	0	0	0	0	0	0	0	0	0	0	0	0	0	0	0	0	0	0	0	0	0	0	0	0	0	0	0	0	0	0	0	0	0	0	0	0	0	0	0	0	0	0	0	0	0	0
744	0	0	0	0	0	0	0	0	0	0	0	0	0	0	0	0	0	0	0	0	0	0	0	0	0	0	0	0	0	0	0	0	0	0	0	0	0	0	0	0	0	0	0	0	0	0	0	0	0
745	0	0	0	0	0	0	0	0	0	0	0	0	0	0	0	0.0628140703517588	0	0	0	0	0	0	0	0	0	0	0	0	0	0	0	0	0	0	0	0	0	0	0	0	0	0	0	0	0	0	0	0	0
746	0	0	0	0	0	0	0	0	0	0	0	0	0	0	-0.00510099979596001	0	0	0	0	0	0	0	0	0	0	0	0	0	0	0	0	0	0	0	0	0	0	0	0	0	0	0	0	0	0	0	0	0	0
747	0	0	0	0	0	0	0	0	0	-0.00337906332364669	0	0	-0.0101371899709401	0	0	0	0	0	0	0	0	0	0	0	0	0	0	0	0	0	0	0	0	0	0	0	0.0190294957183635	0	0	0	0	-0.00337906332364669	0	0	-0.00337906332364669	-0.00675812664729337	0	0	0
748	0	0	0	-0.0182415176942722	0	0	0	0	-0.0182415176942722	0.0585651537335286	0	0	0	0	0	0	0	0	0	0	0	0	0	0	0	0	0	0	0	0	0	0	0	0	-0.0364830353885443	0	0	-0.0182415176942722	0	0	0	-0.0182415176942722	0	0	0	-0.109449106165633	0	0	0
749	0	0	0	0	0	0	0	0	0	0	0	0	0.0144487790781679	0	0	0.00481625969272263	0	0	0	0	0	-0.00415869583298678	0	-0.00623804374948016	0	0	-0.00207934791649339	0	-0.00207934791649339	0	0	0	0	0	0	0	0	0	0	0	0	0	0	0	-0.00623804374948016	-0.00207934791649339	0	0	0
750	0	0	0	0	0	0	0	0	0	-0.0202142712755205	0	0	0	0	0.140154169586545	0	0	0	0	0	0	0	0	0	0	0	0	0	0	0	0	0	0	0	0	0	0	0.0350385423966363	0	-0.040428542551041	0	0	0	0	0	0	0	0	0
751	0	0	0	0	0	0	0	0	0	0	0	0	0	0	0	0	0	0	0	0	0	0	0	0	0	0	0	0	0	0	0	0	0	0	0	0	0	0	0	0	0	0	0	0	0	0	0	0	0
752	0	0	0	0	0	0	0	0	0	0	0	0	0	0	0	0	0	0	0	0	0	0	0	0	0	0	0	0	0	0	0	0	0	0	0	0	0	0	0	0	0	0	0	0	0	0	0	0	0
753	0	0	0	0	0	0	0	0	0	0	0	0	0	0	0	0	0	0	0	0	0	0	0	0	0	0	0	0	0	0	0	0	0	0	0	0	0	0	0	0	0	0	0	0	0	0	0	0	0
754	0	0.24764056583615	0	0	0.0177406115749336	0	0.0677723856414029	0.0259672812256557	0	0	0	0	0.0259672812256557	0.0658695972565603	0	0	0	-0.0120322464204067	0	0.0918368784822163	0.353412479123615	0.0658695972565603	0	0	0	0	0	0	-0.0683879017527557	-0.0240644928408134	-0.0120322464204067	0	0	0	0	0.215349403344614	0	0	0	0	0	-0.0221617044559711	0	0.40047915273489	0.013935034805249	0	0	0	0
755	0	0	0	0	0	0	0	0	0	0	0	0	0	0	0	0	0	0	0	0	0	0	0	0	0	0	0	0	0	0	0	0	0	0	0	0	0	0	0	0	0	0	0	0	0	0	0	0	0
756	0	-0.0124703828407532	0	0	0	0	0	-0.00623519142037661	0	0	-0.0124703828407532	0	0	0	-0.00623519142037661	0	0	0	0	0	0	0	0	-0.00623519142037661	0	0	-0.00623519142037661	0	0	0	0.0205170291341814	0	-0.00623519142037661	0	0.0142818377138048	0	-0.0124703828407532	0	0	0	-0.0187055742611298	-0.00623519142037661	0	0.0080466462934282	0	0	-0.0187055742611298	0	0.0205170291341814
757	0	0	0	0	0	0	0	0	0	0	0	0	0	0	0	0.00678241996744438	0	0	0	0	0	0	0	0	0	0	0	0	0	0	0	0	0	0	0	0	0.0299458710401255	0	0	0.0023401473007481	0	0	0	0.00678241996744438	0	0	0	0.000238021934800001	0
758	0.083219611342346	-0.105585762293674	0	0.109248239076467	0	-0.086522101090933	0	-0.024197389342724	0	0.252961323775625	-0.0311623558741041	0	0	-0.242333880461453	0.150678051230537	0	0.188805373636021	0.0571909836082247	0.691065544404479	1.07050753006791	0.219967729510125	0	0	-0.0311623558741041	0.150678051230537	0	2.05962668718488	0.351582119537921	0.370645780740662	0.100452034153692	0	0	0.0502260170768458	0.793348816949569	0	0	0.512887614082632	0.0502260170768458	-0.0311623558741041	0	0.169741712433279	0.692896782795879	0.150678051230537	0.11438196721645	-0.0366873742686602	-0.1297831516364	-0.0311623558741041	-0.46011038454597	-0.218136491118729
759	0	0	0	0	0	0	0	0	0	0	0	0	0	0	0	0	0	0	0	0	0	0	0	0	0	0	0	0	0	0	0	0	0	0	0	0	0.0120612712579906	0	0	0	0	0	0	0	0	0	0	0	0
760	0	0	-0.00957652601942119	0	0	0	0	0	0	0	0	0	0	0	0	0	0	-0.00191530520388424	0	0	0	0	0	0	0	-0.00191530520388424	0	0	0	0	0	0	0	0	0	0	0	0	0	0	0	0	0	0	-0.00191530520388424	0	0	0	0
761	0	0	0	0	0	0	0	0	0	0	0	0	0	-0.00585137507314219	0	0	0	-0.0409596255119953	0	0	0	0	0.031718873822452	0	0	-0.00585137507314219	0	0	-0.00585137507314219	0	0	-0.0234055002925688	0	0	0	0	0	0	0	0	0	0	0	0	0	0	0	0	0
762	0	0	-0.0308573947542429	0	0.00163401429009304	0	0	-0.00440819925060613	0	0	-0.00881639850121226	0.0209008255826105	0.00604221354069917	0	0.00604221354069917	0	0	0	0	0	0	-0.00440819925060613	0	0	0	0.0104504127913053	0	0	0	0	0	0	0	0	0	0.0104504127913053	0	0	-0.00440819925060613	0	0	0	0	0.00604221354069917	0	-0.0132245977518184	0	-0.00440819925060613	0
763	0	0	0	-0.0218197687104517	0	0	0	0	0	0	0	0	0	0	0.0447427293064877	0	0	0	0	0	0	0	0	0	0	0	0	0	0	0	0	0	0	0	0	0	0	0	0	0	0	0	0	0	0	0	0	0	0
764	-0.00434933890048713	0	0	0	0	-0.0130480167014614	0	0	0	-0.00434933890048713	0	0	0.00461927096498372	0	0	0	0	-0.00434933890048713	-0.00869867780097425	0.00896860986547085	0	0	0	0	-0.00434933890048713	0	0.00896860986547085	0	0	-0.00869867780097425	0	0	0	0.0179372197309417	0	0	0	0	0.0138578128949512	-0.0217466945024356	-0.0260960334029228	0.0358744394618834	0	0	0	0	0	0	0
765	0	0	0	0	0	0	0	0	0	0	0	0	0	0	0	0	0	0	0	0	0	0	0	0	0	0	0	0	0	0	0	0	0	0	0	0	0	0	0	0	0	0	0	0	0.0560747663551402	0	0	-0.0219756070761455	0
766	0	0	0	0	0	0	0	0	0	0	0	0	0	0	0	0	0	0	0	0	0	0	0	0	0	0	0	0	0	0	0	0	0	0	0	0	0	0	0	0	0	0	0	0	0	0	0	0	0
767	0	0	0	0	0	0	0	0	0	0	0	0	0	0	0	0	0	0	0	0	0	0	0	0	0	0	0	0	0	0	0	0	0	0	0	0	0	0	0	0	0	0	0	0	0	0	0	0	0
768	0	0	0	0	0	0	0	0	0	0	0	0	0	0	0	0	0	0	0	0	0	0	0	0	0	0	0	0	0	0	0	0	0	0	0	0	0	0	0	0	0	0	0	0	0	0	0	0	0
769	0	0	0	0	0	0	0	0	0	0	0	0	0	0	0	0	0	0	0	0	0	0	0	0	0	0	0	0	0	0	0	0	0	0	0	0	0	0	0	0	0	0	0	0	0	0	0	0	0
770	0	0	0	0	0	0	0	0	0	0	0	0	0	0	0	0	0	0	0.00706414241311105	0	0	0	0	0	0	0	0	0	0	0	0	0	0	0	0	0	0	0	0	0	0.00861560566414933	0	0	0	0	0	0	0	0
771	0	0	0	0	0	0	0	0	-0.0018216263480035	0	0	0	0	0	0	0	0	0	0	0	0	0	0	0	0	0	0	0	0	0	0	0	0	0	0	0	0	0	0	0	0	0	0	0	0	0	0	0	0
772	0	0	0	0.100300902708124	0	0	-0.0361532899493854	0	0	0	0	0	0	0	0	0	0	0	0	0	0	0	0	0	0	0	0	0	0	0	0	0	0	0	0	0	0	0	0	0	0	0	0	0	0	0	0	0	0
773	0	0	0	0	0	0	0	0	0	0	0	0	0	0	0	0	0	0	0	0	0	0	0	0	0	0	0	0	0	0	0	0	0	0	0	0	0	0	0	0	0	0	0	0	0	0	0	0	0
774	-0.0100664384940608	0	-0.0616969852848175	0	-0.0100664384940608	0	0	0	0.0024365106061249	0	-0.0428624626171487	0	0	0	0	0	0	0	0	0	0.00876808417360807	0	0	0	0	0	0	0	-0.0050332192470304	0	0	0	-0.0327960241230879	-0.0100664384940608	0	0	0	0	-0.0100664384940608	0.0263042525208242	0	-0.0050332192470304	0.0175361683472161	0	0	-0.0352325347292128	0	-0.00633157356748313	0
775	0	-0.000245120268259622	0	0	0	0	0	0	0	0	0	0	0	0	0	0	0	0	0	0	0.00122989884082034	0	0	0	0	0	0	0	0	0	0	0	0	0	0	0	0	0	0	0	0	0	0	0	0	0	0	0	0
776	0	0	0	0	0	0	0	0	0	0	0	0	0	0	0.0113861537882828	0	0	0	0	0	0	0	0	0	0	0	0	0	0	0	0	0	0	0	0	0	0	0	0	0	-0.0016476907613979	0	0	0	0	0	0	0	0
777	0	0	0	0	0	0	0	0	0	0	0	0	0	0	0	0	0	0	0	0	0	0	0	0	0	0	0.0627615062761506	0	0	-0.0220994475138122	0	0	0	0	0	0	0	0	0	0	0	0	-0.0110497237569061	0	-0.0110497237569061	0	0	0	0
778	0	0	0	0	0	0	0	0	0	0	0	0	0	0	0	0	0	0	0	0	0	0	0	0	0	0	0	0	0	0	0	0	0	0	0	0	0	0	0	0	0	0	0	0	0	0	0	0	0
779	0	0	0	0	0	0	0	-0.00150963904530427	-0.00257678085913382	0	0	-0.00150963904530427	0	0	0	0	0	0	0	0	0	0	0	0	0	0	0	0	0	0	0	0	0	0	0	0	0	0	0	0	0	0	0	0	0	0	0	0	0
780	0	0	0	0	0	0	0	0	0	0	0	0	0	0	0	0	0	0	0	0	0	0	0	0	0	0	0	0	0	0	0	0	0	0	0	0	0	0	0	0	0	0	0	0	0	0	0	0	0
781	0	0	0	0.00608288212249936	0	0	0	-0.00395022713806044	0	0	0	0	0	-0.00395022713806044	0	0	0	0	0	0	0	0	0	0	0	0	0	0	0	0	0	0	0	0	0	0	0	0	0	0	0	0	0	0	0	0	0	0	0
782	0.00621368160635202	-0.0209424083769634	0.043956043956044	0	-0.0209424083769634	-0.06282722513089	0	0	0	0.0669696795351245	0	0.0020712272021173	-0.0209424083769634	0	0	0	0	0	0.00414245440423451	-0.0209424083769634	0	-0.0209424083769634	0	0	0	0	0	0	0	0	0	0	-0.0209424083769634	0	0	-0.0209424083769634	0	0	0	0	0	0	-0.0209424083769634	0	0	0	0	0	0
783	0	0	0	0	0	0	0	0	0	0	0	0.29296875	0	0	0	0	0	0	0	0	0.178224056942054	0	0	0	0	0.1953125	0	0	0.201419517355135	0	0.333252653471027	0	0.09765625	0	0	0	0	0	0	0	0.023195460413081	0	0	0	0	-0.114744693057946	0	-0.418694868760757	0
784	0	0	0	0	0	0	0	0	0	0	0	0	0	0	0	0	0	0	0	0	-0.00148495738172314	0	0	0	0	0	0	0	0	0	0	0	0	0	0	0	0	0	0	0	0	0	0	-0.00148495738172314	0	0	-0.00148495738172314	0	0
785	0	0	0	0	0	-0.00962927298988926	0	-0.0288878189696678	0	0	0	0	-0.00962927298988926	0	0	0	-0.00962927298988926	0	0	0	0	0	-0.00962927298988926	0	-0.00962927298988926	0	0	0	0	0	0	0	0	0	0	0	0	0	0	0	0	0	0	0	0	0	0	0	0
786	0	0	0	0	0	0	0	0	0	0	0	0	0.00779575131553303	0	0	0.00779575131553303	0	0	0	0	0	0	0	0	0	0	-0.00019151849848923	0.0155915026310661	0.00389787565776652	0	0	0	-0.00204469707812788	0	0.00964892989517172	0	0	-0.00613409123438363	0	-0.00204469707812788	0	-0.00038303699697847	-0.00204469707812788	0	0	0	0	0	0
787	0	0	0	0	0	0	-0.00275277341921986	0	0.00348881833722918	0	0	0	0	0	0	0	0	0	0	0	0	0	-0.00137638670960993	0	0	0	0	0	0.00211243162761925	0	0	0	0	0	-0.00275277341921986	0	0	0	0	0	0	0	0.00697763667445836	0	-0.0041291601288298	0	0	0	0.00496090817324777
788	0	0	0	0	0	0	0	0	0.00535690370965582	0	0	0	0	0	0	0	0	0	0	0	0	0	0	0	0	0	0	0	0	0	0	0	0	0	0	0	0	0	0	0	0	0	0	0	0	0	0	0	0
789	-0.0877706260971328	-0.0169509909641734	0	-0.0292568753657109	0.207813798836243	-0.0877706260971328	-0.175541252194266	0.0661745285703241	0	-0.175541252194266	0.007660777838902	-0.0292568753657109	0	0	0	0	0	0.0415627597672485	-0.0292568753657109	-0.117027501462844	0	0	0	-0.0585137507314219	0.0538686441687862	0	-0.0292568753657109	0	0	-0.0292568753657109	-0.175541252194266	-0.117027501462844	0	-0.0292568753657109	-0.0462078663298843	0	-0.0292568753657109	-0.0877706260971328	0	0	0	0.0415627597672485	0	0.124688279301746	-0.0585137507314219	0.0415627597672485	-0.0877706260971328	0	0
790	-0.124197888635893	0	0	0	-0.0762162180605563	-0.0827985924239288	0	-0.124674151143826	0	0	0	0	0	-0.0070586368713051	0	-0.110556877401216	0	0	0	0	-0.103498240529911	0	0	-0.124197888635893	0	0	0	-0.0413992962119644	0	0	0	0	0	0	0	0	0	0	0	0	0	-0.0206996481059822	0	0	0	0	0	0	0
791	0	0	0	0.0238068355866051	0	0	0	0	0	0	0	0	0	0	0	0	0	0	0	0	0	0	0	0	0	0	0	0	0	0	0	0	0	0	0	0	0	0	0	0	0	0	0	0	0	0	0	0	0
792	0	0	0	0	0	0	0	0	0	0	0	0	0	0	0.00433764205777739	0	0	0	0	0	0	0	0.00120183003925519	0	0	-0.0009669909896335	0	0	0	0	0	0	0	0	0	0	0	0	0	0	0	0	0	0	0	0	0	0	0
793	0	0	0	0	0	0	0	0	0	0	0	0	0	0	0	0	0.125052105043768	0	0.0416840350145894	0	0	0.166736140058358	0	0	0	0	0	0.179701048134406	0	0	0	-0.0731924727395746	0	0	0	0.0546489430906377	0	0	0	0	0	0	0	-0.0574382538770821	0	0	0	0	0
794	0	0	0	0	0	0	0	0	0	0	0	0	0	0	0	0	0	0	0	0	0	0	0	0	0	0.00267916945746818	0	0	0.00267916945746818	0	0.00133958472873409	0	0	0	0	0.0196176924460038	-0.000691512718647678	0	0.0053148982063751	0.00432106983696485	-0.000691512718647678	0	0.0366865375602232	0	0	0.00496914184705127	0	0	0
795	0	0	0	0	0	0.00657073395098232	0	0	0	0	0	0	0	0.00657073395098232	0	-0.00310154456919546	0	0	0	0	0	0	-0.00310154456919546	0	0	0	0	0	0	0	0	0	0	0	0	0	0	0	0	0	0	0	0	0	0	0	0	0	0
796	-0.117984156413282	-0.0168548794876117	-0.0382053783068592	-0.0168548794876117	0	0	0	0	0	0	0	0	0	0	0	0	0	0	0	0	0	0	0	-0.0168548794876117	0	0	0	-0.0168548794876117	0	0	0	0	0	0	0	0	0	0	0	0	0	0.11685655857435	0	0	0	0	0	0	-0.0168548794876117
797	0	0	0	0.013958032847904	0	0	0	0	0	0	0	0	0	0	0	-0.00482404303046383	0	0	0	0	0	0	0	0	0	0	0	0	0	0	0	-0.00241202151523192	0	0	-0.00241202151523192	0	0	0	0	0	0	0	0	0	-0.00241202151523192	0	0	0	0
798	0	0	0	0	0	0	0	0	0	0	0	0	0	0	0	0	0	0	0	0	0	0	0	0	0	0	0	0	0	0	0	0	0	0	0	0	0	0	0	0	0	0	0	0.064998375040624	0	0	0	0	0
799	0	0	0	0	0	0	0	0	0	0	0	0	0	0	0	0	0	0	0	0	0	0	0	0	0	0	0	0	0	0	0	0	0	0	0	0	0	0	0	0	0	0	0	0	-0.00815793767335618	0	0	0	0
800	0	0	0	0	0	0	0	0	-0.0129282482223659	-0.00646412411118293	0	0	0	0	0	0	0	0	0	0	0	0	0	0	0	0	0	0	0	0	0	0	0	0	0	0.0232585184323759	0	0	0	0	0	0.0116292592161879	0	0	0	0	0	0	0
801	0	0	0	0	0	0	0	0	0	0	0	0	0	0	0	0	0	0	0	0	0	0	0	0	0	0	0	0	0	0	0	0	0	0	0	0	0	0	0	0	0	0	0	0	0	0	0	0	0
802	0	0	0	0	0	0	0	0	0	0	0	0	0	0	0	0	0	0	0	0	0	0	0	0	0	0	0	0	0	0	0	0	0	0	0	0	0	0	0	0	0	0	0	0	0	0	0	0	0
803	0	0	0	0	0	0	-0.0200682319887618	0.024869435463815	0	0	0	0	0	0	0	0	0	0	0	0	0	0.0497388709276299	0	0	0	0	0	0	0	0	0	0	0	0	0	0	0	0	0	0	0	0	0	0	0	0	0	0	0
804	0	0	0	0	0	0	0	0	0	0	0	0	0	0	0	0	0	0	0	0	0	0	0	0	0	0	0	0	0	0	0	0	0	0	0	0	0	0	0	0	0	0	0	0	0	0	0	0	0
805	0	0	0	0	0	0	0	0	0	0	0	0	0	0	0	0	0	0	0	0	0	0	0	0.0184179022009393	0	0	0	0	-0.00110919163383814	0	0	-0.00687876182287188	0	0	0	0	0	0	0	0	-0.00687876182287188	0	0	0	0	0	0	0	0
806	0	0	-0.0123031496062992	0	-0.00615157480314961	0	0	0	0	0.0479539641943734	0	0	0.0319693094629156	0	-0.00615157480314961	0	0	0	0	0	0	-0.00615157480314961	0	0.0159846547314578	0	0	0	0	0.081134709104457	0	0	0.0159846547314578	0	0	-0.0135617838371227	0	0	0	0	0	0.0294992397849246	0	0	0	0	-0.00615157480314961	0	0	0.0393323197132328
807	0	0	0	0	0	0	0	0	0	0	0	0	0	0	0	-0.0144843568945539	0	0	-0.0144843568945539	0	0	0	-0.0144843568945539	0	0	0	0	0	0	0	-0.0144843568945539	0	0	0	0	0	-0.0289687137891078	0	0	0	0	0	0	0	0	0	0	0	0
808	0	0	0	0	0	0	0	0	0	0	0	0	0	0	0	0	0	0	0	0	0	0	0	0	0	0	0	0	0	0	0	0	0	-0.0269832703723691	0	0	0	0.0518403317781234	0	0	0	0	0	0	0	0	0	0	0
809	0	0	0	0	0	0	0	0	0	0	0	0	0	0	0	0	0	0	0	0	0	0	0	0	-0.0588581518540318	0	0	0	0	-0.235432607416127	0	0.069345604366205	0	0	0	0	0	0	0	-0.0588581518540318	0	0	0	0	-0.117716303708064	0	-0.0588581518540318	0	0
810	0	0	-0.179958446132566	0	0	0	0	0.130039011703511	0	0	0.519232202781854	0	0	0	0	-0.572847013339671	0	0	0.063171817787375	0	0	-0.490879748000833	0	-0.801801049869102	0	-0.066867193916136	-0.0979911807937286	0	0.0160239154548912	0	-0.0489955903968643	0.0650195058517555	0	-0.146986771190593	0	-0.539875338397697	-0.0329716749419731	-0.146986771190593	0	0.195058517555267	0	-0.065943349883946	0	-0.146986771190593	0	0	0	0	0
811	0	0	0	0	0	0	-0.00481486831335163	0	0	0	0	0	0	0	0	0	0	0	0	-0.00481486831335163	0	0	0	0	0	0	0	0	0	0	0	-0.00481486831335163	0	0	0	0	0	0	0	0	0	0	0	0	0	0	0	0	0
812	0	0	0	0	0	0	0	0	0	0	0	0	0	0	0	0	0	0	0	0	0	0	0	0	0	0	0	0	0	0	0	0	0	0	0	0	0	0	0	0	0	0	0	0	0	0	0	0	0
813	0	0	0	0	0	0	0	0	0	0	0	0	0	0	0	0	0	0	0	0	0	0	0	0	0	0	0	0	0	0	0	0	0	0	0	0	0	0	0	0	0	0	0	0	0	0	0	0	0
814	0	0	0	0	0	0	0	0	0	0	0	0	0	0	0	0	0	0	0	0	0	0	0	0	-0.00956205775482884	0	0	0	-0.00956205775482884	0	0	0	0	0	0	-0.00956205775482884	0	0	-0.0191241155096577	0	-0.00956205775482884	0	0	0	0	0	0	0	0
815	0.023080656289105	-0.0367107195301028	0.169923534409516	0	-0.0734214390602056	0.023080656289105	0.218174582084171	-0.110132158590308	-0.146842878120411	0.0115403281445523	-0.110132158590308	-0.220264317180617	-0.112221893686754	0.00945059304810597	-0.146842878120411	0.0965020953493104	0	-0.0367107195301028	-0.146842878120411	-0.110132158590308	-0.146842878120411	0	0	-0.0734214390602056	-0.110132158590308	-0.0367107195301028	-0.110132158590308	-0.0367107195301028	0	0.0849617672047579	-0.146842878120411	-0.0367107195301028	0	0	-0.0367107195301028	0	0	-0.0367107195301028	0	-0.0734214390602056	-0.110132158590308	-0.0734214390602056	0.0849617672047579	-0.110132158590308	-0.0734214390602056	0.0849617672047579	-0.146842878120411	0.227625175132277	0.349297661867138
816	0	0	-0.0178491744756805	0	0	0.0196590914816109	0	0	0	0	0	0	0	0	0.0304560946212872	-0.0267737617135207	0	0.0018099170059305	-0.00892458723784025	0	-0.0267737617135207	0	-0.00892458723784025	0	0	-0.00892458723784025	-0.0035573351159549	0	-0.0124819223537951	0	0	0	-0.0267737617135207	0.0142918393597256	0	-0.0303310968294756	0	0	-0.0178491744756805	0	0	0	0	0.0393181829632219	0	0	0	0	0
817	0	0	0	0	0	0	0	0	0	0	0	0	0	0	0	0	0	0	0	0	0	0	0	0	0	0	0	0	0	0.109529188088697	0	0	0	0	0	0	0.202036126109049	0	0	0	0.0925069380203515	0	0	0	0	0	0.0632757190785216	0	0
818	0	0	0	0	0	0	0	0	0	0	0	0	0	0	0	0	0	0	0	0	0	0	0	0	0	0	0	0	-0.00785761992692413	0	0	0	0	0	0	0	0	0	0	0	0	0	0	0	0	0	0	0	0
819	0	0	0	0	0	0	0	0	0	0	0	0	0	0	0	0	0	0	0	0	0	0	0	0	0	0	0	0	0	0	0	0	0	0	0	0	0	0	0	0	0	0	0	0	0	0	0	0	0
820	0	0	0	0	0	0	0	0.0700280112044818	0	0	0	0	0	0	0	-0.036941263391208	0	0	0	-0.036941263391208	0	0	0	0	0	0	0	0	0	0	0	0	0	0	0	0	0	0	0	0	0	0	0	0	0	0	0	0	0
821	0	0	0	0	0	0	0	0	0	0	0	0	0	0	0	0	0	0	0	0	0	0	0	0	0	0	0	0	0	0	0	0	0	0	0	0	0	0	0	0	0	0	0	0	0	0	0	0	0
822	0	0	0	0	0	0	-0.0995421063109695	0	0	0	0	0	0	-0.0398168425243878	0	0	0	0	0	0.054857933877993	0	0	0.0373831775700935	0	0.147099045326079	0	0.0747663551401869	0	0	0	-0.121884192527457	-0.0199084212621939	0	-0.0199084212621939	0	0.0723326901858922	0	-0.00243366495429431	0	0.0747663551401869	0	-0.0223420862164882	0	0	0	0	0.247958456520566	-0.0398168425243878	0
823	0	0	0	0	0	0	0	0	0	0	0	0	0	0	0	0	0	0	0	0	0	0	0	0	0	0	0	0	0	0	0	0	0	0	0	0	0.0067990209409845	0	0.0067990209409845	0	0	0	0	0	0	0	0	0	0
824	0	0	0	0	0	0	0	0	0	-0.00455684666210982	0.00803600128576021	0	0	0	0	-0.0182273866484393	0	0	0	0	0	-0.00455684666210982	0	0	0	0	0	-0.00911369332421964	0	0	0.00347915462365039	0	-0.0227842333105491	0	0	0	0	0	0	0	0	0	0	0	0	0	0	0	0
825	-0.0665631240292878	0.0439753737906772	-0.515917875428409	0	0.0431752893329816	0	0	0	-0.0221877080097626	-0.155713998297186	0.153713787152946	0	0	0	-0.244064788107389	0	-0.0221877080097626	0	-1.62730348706078	0.0213876235520666	0.063362786198504	0	-0.0221877080097626	0	-0.155313956068338	0	-0.0221877080097626	0	0	0	0	-0.0891508742678988	-0.0221877080097626	0	0	0	-0.0221877080097626	0	-0.0443754160195252	0	0	0	0	-0.045575542706069	0	-0.000400042228847999	0	0	-0.0221877080097626
826	0	0	0	0	0	0	0	0	0	0	0	0	0	0	0	0	0	0	0	0	0	0	-0.00163644694639	0	0	0	0	0	0	0	0	0.0089812292309074	0	0.00299374307696913	0	0	0	0	0.00598748615393827	0	0	0	0	0	0	0	0	0.00107814531476828	0
827	0	0	0	0	0	0	0	0	0	0	0	0	0	0	0	0	0	0	0	0	0	0	-0.0140893263289254	-0.0020127609041322	0	0	0	0	0.00674550385572771	0	0.00785160407737212	0	0.00674550385572771	0	0.00493218249075216	0	0	0	-0.00019943953915668	0.00291942158661996	0	0	0	0	0	0.00493218249075216	0.0147965474722565	0.0314064163094885	0
828	0	0	0	0	0.0257201646090535	0	0	0.0771604938271605	0	0	0.0257201646090535	0.0650992225691699	0	0	0	0	0	0	0	-0.0120612712579906	0	-0.0361838137739718	0	-0.0120612712579906	0	0	0	0	-0.0120612712579906	0	0	0	-0.0241225425159812	0	0	0	0	0	-0.0120612712579906	0	0	-0.0241225425159812	0	0	-0.0120612712579906	0	0	0	0
829	0	0	0	0	0	0	0	0	0	0	0	0	0	0	0	0	0	0	0	0	0	0	0	0	0	0	0	0	0	0	0	0	0	0	0	0	0	0	0	0	0	0	0	0	0	0	0	0	0
830	0	0	0	0	0	0	0	0	0	0	0	0	0	0	0	0	0	0	0	0	0	0	0	0	0	0	0	0	0	0	0	0	0	0	0	0	0	0	0	0	0	0	0	0	0	0	0	0	-0.00774233508826262
831	0	0	0	0	0	0	0	0	0	0	0	0	0	0	0	0	0	0	0	0	0	0	0	0	0	0	0	0	0	0	0	0	0	0	0	0	0	0	0	0	0	0	0	0	0	0	0	0	0
832	-0.134108180599017	0	0	0	0	0	0	0	0	-0.0447027268663388	0	0	0	0	0	0	-0.0447027268663388	0	-0.0447027268663388	0	0	0	0	0	0	-0.0447027268663388	0	0	0	0	0	0	0	-0.0447027268663388	0	-0.0894054537326777	0	0	0	0	0	0	-0.0447027268663388	0	0	0	0	0	0
833	0	0	0	0	0	-0.0278009452321379	0	0	0	0.0621697233447311	0	0	0	0	0.0621697233447311	0	0	0.0621697233447311	0	0	0	0	0.0032839164402277	0	0	0	0	0	0	0	0	0	0	0	0	0	0	0	0	0	0	0	0	0	0	0	0	0.0310848616723656	0
834	0	0	0	0	-0.0371195248700817	0	0	0	0	0	0	0	0	0.0422455544949977	0	0	-0.0371195248700817	0	0	0	0	0	0.238095238095238	0	-0.0371195248700817	0	0	0	0.121610633860077	0	0	0	0	0	0	0	0	0	0	-0.0742390497401633	0	0	0	0	0	0	0	0	0
835	0	0	-0.039032006245121	-0.0195160031225605	-0.039032006245121	0	0	0	0	0	-0.0195160031225605	0	0	0	0	0	0	-0.039032006245121	0	0	0	0	0	0	0	0	0	-0.039032006245121	0	-0.0195160031225605	0	0	-0.0195160031225605	-0.039032006245121	0	0	0	0	0	0	0	0	-0.0195160031225605	0	0	0	0	0	0.0528541226215645
836	0	0	0	0	0	0	0	0	0	0	0	0	0	0	0	0	0	0	0	0	0	0	0	0	0	0	0	0	0	0	0	0	0	0	0	0	0	0	0	0	0	0	0	0	0	0	0	0	0
837	0	0	0	0	0	0	0	0	0	0	0	0	0	0	0	0	0	0	0	0	0	0	0	0	0	0	0	0	0	0	0	0	0	0	0.0702247191011236	0	0	0	0	0	0	0	0	0	0	0	0	0	0
838	0	0	0	0	0	0	0	0	0	0	0	0	0	0	0	0	0	0	0	0	0	0	0	0	0	0	0	0	0	0	0	0	0	0	0	0	0	0	0	0	0	0	0	0	0	0	0	0	0
839	0	0	0	0	0	0	0	0	0	0	0	0	0	0	0	0	0	0	0	0	0	0	0	0	0	0	0	0	0	0	0	0	0	0	0	0	0	0	0	0	0	0	0	0	0	0	0	0	0
840	0	0	0	0	0	0	0	0	0	0	0	0	0	0	0	0	0	0	0	0	0	0	0	0	0	0	0	0	0	0	0	0	0	0	0	0	0	0	0	0	0	0	0	0	-0.0223363859727496	0	0	0	0
841	0	0	0	0	0	0	0	-0.000808074278187651	0	0	0	0	0	0	0.00090589556835888	0	0	0	0	0	0	0	0	0	0	0	0	0	0	0	0	0	0	0	0	-0.000808074278187651	-0.0016161485563753	0	0	0	0	0	0	0	0	0	0	0	0
842	0	0	0	0	0	0	0	0	0	-0.00109870791948668	0	0	0	0	0	0	0	0	0	0	0	0	0	0	0	0	0	0	0.0038099592334362	0	0	0	0	0	0	0	0	0	0	0	0	0	0	0	0	0	0	0	0
843	-0.0454545454545455	0	0.0080514284115392	-0.0454545454545455	-0.0227272727272727	0.0923361034164358	-0.0454545454545455	0.131166232966787	0.0307787011388119	-0.0227272727272727	-0.0681818181818182	0	-0.0146758443157336	-0.0681818181818182	0.108438960239514	0	-0.0227272727272727	0	-0.0909090909090909	-0.0227272727272727	-0.113636363636364	0.0080514284115392	-0.113636363636364	-0.0454545454545455	0.0923361034164358	0	0	-0.0227272727272727	0	-0.173766753406643	-0.0454545454545455	-0.0227272727272727	0.0307787011388119	0	0.100387531827975	0	-0.0227272727272727	0.0307787011388119	-0.0454545454545455	0.0615574022776239	-0.113636363636364	0.0307787011388119	-0.0227272727272727	0	0	-0.0227272727272727	0	0	-0.0681818181818182
844	0	0	0	0	0	0	0	0	0	0	0	-0.0080177428611805	0	0	0	0.0341763499658237	0	-0.0421940928270042	-0.0843881856540084	0.0683526999316473	-0.0843881856540084	0	0	0	0	0	0	0	0	0	0	0	0	0	0	0	0	0	0	0	0	0	0	0	0	0	0	0	0.0181408642434626
845	0	0	0	0	0	0	0	0	0	0	0	0	0	0	0	0	0	0	0	0	0	0	0	0	0	0	0	0	0	0	0	0	0	0	0	0	0	0	0	0	0	0	0	0	0	0	0	0	0
846	0	0	0	0	0	0	0	0	0	0	0	0	0	0	0	0	0	0	0	0	0	0	0	0	0	0	0	0	0	0	0	0	0	0	0	0	0	0	0	0	0	0	0	0	0	0	0	0	0
847	0	0	0	0	0	0	0	0	0	-0.00227966990379793	0.00753465943339361	0	0	0	0	0	-0.00683900971139379	0	0	0	0	0	-0.00227966990379793	0	-0.00455933980759586	0.0226039783001808	0	0	0	0	0	0	0	0	0.00753465943339361	-0.00227966990379793	0	0	0	0	0	0	0	0.0301386377335744	0	-0.00227966990379793	0.0226039783001808	0	0
848	0	0	0	-0.00138238018219771	0	0	0	0	0	-0.00138238018219771	0	0	0	0	0	-0.00138238018219771	0.0030683317480286	0	0	0	0	0	0.0030683317480286	0	0	0	-0.00138238018219771	0	0	0	0	0	0	0	0	0	-0.00138238018219771	0	0	0	0	0	0.015341658740143	0	0	0	0	0	0
849	0	0	0	0	0	0	0	0	0	0	0	0	0	0	0	0	0	0	0	0	0	0	0	0	0	0	0	0	0	0	0	0	0	0	0	0	0	0	0	0	0	0	0	0	0	0	0	0	0
850	0	0	0	0	0	0	0	0	0	0	0	0	0	0	0	0	0	0	0	0	0	0	0	0	0	0	0	0	0	0	0	0	0	0	0	0	0	0	0	0	0	0	0	0	0	0	0	0	0
851	0	0	0	0	0	0.411706447678099	0	0.0647668393782383	-0.042571306939123	-0.0212856534695615	0	0.119345791506473	0	0	0.264526631330276	0	-0.0416614279695697	0	0	0	0	0	0	0	0	0	0	0	-0.0212856534695615	0	0	0.0110977662195577	0	0	0	0	0	0	0	0	0	0	0.226683937823834	0	0	0	0	0	0
852	0.0171526586620926	-0.0180212650928095	0	0	0	0	0	0	-0.00901063254640476	0	0	-0.0180212650928095	0	0	0	0	0	0	0	0	0	0	0	0	0	0	0	0	0	0	0	0	0	0	0	0	0	0	0	0	0.0171526586620926	0	0	0	0	0	0	0	0
853	0	0	0	0	0	0	0	0.0119161105815062	0	0	0	0	0	0	0	0	0	0	0	0	0	0	0	0	0	0	0	0	0	0	0	0	0	0	0	0	0	0	0	0	0	0	0	0	0	0	0	0	0
854	0	0	0	0	0	0	0	0	0	0	0	0	0	0	0	0	0	0	0	0	0	0	0	0	0	0	0	0	0	0	0	0	0	0	0	0	0	0	0	0	0	0	0	0	0	0	0	0	0
855	-0.0104319101746697	0	0	0	0	0	0	0	0	0	0	0	0	0	0	0	0	0	0	0	0	0	0	0	0	0	0	0	0	0	0	0	0	0	0	0	0	0	0	0	0	0	0	0	0	0	0	0	0
856	0	0	0	0	0	0	0	0	0	0	0	0	0	0	0.0525026251312566	0	0	0	0	0	0	0	0	0	0	0.0175008750437522	-0.00908347715505495	0	0	0	0	0	0	0	0.0350017500875044	0	0	0	0	0	0	0	0	0	0	0	-0.00908347715505495	0	0
857	0	0	0	0	0	0	0	0	0	0	0	0	0	0	0	0	0	0	0	0	0	0	0.0377057022409078	0	0	-0.026395671109938	0	0	0	0	0	0.0509035377958768	0	0	0	0	0	0	0	0	0	0	0	0.0763553066938152	0	0	0.101807075591754	0	0
858	0	0	0	0	0	0	0	0	0	0	0	0	0	0	0	0	0	0	0	0	0	0	0	0	0	0	0	-0.00184870221104784	0	0	0	0	0	0	0	0	0	0	0	0	0	0	-0.00184870221104784	0	0	0.009974564859608	0	0	0
859	0	0	0	0	0	0	0	0	0	0	0	0	0	0	0	0	0	0	0	0	0	0.00744887709435797	0	0	-0.0131521262604121	-0.00438404208680403	0	0	0	0	0	0	0.011832919181162	0	0	-0.00876808417360807	0	0	0	0	0	0	0	0.011832919181162	0	0	0	0	0
860	0	0	0	0	0	0	0	-0.0265710110269696	0	0	0	0	0	0	-0.0132855055134848	0	0	0	0	0.0689851649924798	-0.0265710110269696	0	0	0	0.0145643242260127	0	0	0.110120500245462	0	0	0.0145643242260127	0	0	0	0	0	0	0	-0.0132855055134848	-0.0265710110269696	0	0	0.0411353352529823	0	0	0	-0.0398565165404544	0	0
861	0	0	0	0	0	-0.0228362639872117	0	-0.0456725279744234	0	0	0	0	0	0	0	0	0	0	0	0	0	0	0	0	0	0	0	0	0	0	0	0	0	0	-0.0228362639872117	0	0	0	0	0	0	0	0	-0.0456725279744234	0	0	0	0	0
862	0	0	0	0	0	0	0	0	0	0	0	0	0	0	0	0	0	0	0	0	0	0	0	0	0	0	0	0	0	0	0	0	0.00482148453508835	0	0	0	0	0	0	0.00482148453508835	0	0	0	0	0	0	0	0	0
863	0	0	0	0	0	0	0	0	0	0	0	0.018470631695604	0	0	0	0	0	0	0	0	0	0	0	0	0	0	0	0	0	0	0	0	0	0	0	0	0	0	0	-0.00780457348005931	0	0	0	0	0	0	0	0	0
864	0	0	0	0	0	0	0	0	0	0	0	0	0	0	0	0	0	0	0	0	0	0	0	0	0	0	0	0	0	0	0	0	0	0	0	0	0	0	0	0	0	0	0	0	0	0	0	0	0
865	0	0	0	0	0	0	0	0	0	0	0	0	0	0	0	0	0	0	0	0	0	0	0	0	0	0	0	0	0	0	0	0	0	0	0	0	0.0346981263011797	0	0	0	0	0	0.0346981263011797	0	0	0	0.018421737547535	0	0.0346981263011797
866	0	0	0	0	-0.00100194377091558	0	0	0	0	0	0	0	0	0	0	0	0	0	0	0	0	0	0	0	0	0	0	0	0	0	0	0	0	0	0	0	0	0	0	0	0	0	0	0	0	0	0	0	0
867	0	0	0	0	0	0	0	0	0	0	0	0	0	0	0	0	0	0	0	0	0	0	0	0	0	0	0	0	0	0	0	0	0	0	0	0	0	0	0	0	0	0	0	0	0	0	0	0	0
868	0	0	0	0	0	0	0	0	0	0	0	0	0	0	0	0	0	0	0	0	0	0	0	0	0	0	0	0	0	0	0	0	0	0	0	0	0	0	0	0	0	0	0	0	0	0	0	0	0
869	0	0.0427756005665458	0	0	0	0.0311429461227032	0	0	0	0	0	0	0	0	0	-0.0097551458394303	0	0.089306218341916	-0.0097551458394303	-0.018000385891817	0	0.0232653088876852	0	0	0	0.0311429461227032	0	0	0	0.0311429461227032	0	0	0	0	0	0	0	0	0	0	0	0	0	0.0311429461227032	0	0	0	0	0.0934288383681096
870	0	-0.0165234633179114	0	-0.0165234633179114	0.0284333238555587	-0.0330469266358229	0	-0.0165234633179114	-0.0495703899537343	-0.0046136027802642	0	0	0	-0.0165234633179114	0	-0.0330469266358229	-0.0165234633179114	-0.0660938532716457	0.0284333238555587	0.0238197210752945	0	0	0	0	-0.0165234633179114	-0.0330469266358229	0	-0.0165234633179114	0.235514555775826	0.0568666477111174	-0.0211370660981756	0	0.154828186989414	0	0	0	0	0.0476394421505893	0	-0.0165234633179114	0	0	0	0	0.0687765082487647	0	0	-0.0330469266358229	0.156759134792559
871	0	0	0	0	0	0	0	0	0	0	0	0	0	0	0	0	0.00624882834468537	0	0	0	0	-0.00176472664384287	0	0.00624882834468537	0	0.0124976566893707	0	0	0	-0.00176472664384287	-0.00529417993152861	0	0	0	0	0	0	0	0	0	0	0	0	0	0	0	0	0.0187464850340561	0
872	0	0	0	0	0	0	0	0	0	0	0	0	0	0	0	0	0	0	0	-0.00210181176173862	0	0	0	0	0	0	0	0	0	0	0	0.00686873433512876	0	0	0	0	0.038753252505121	0	0	0	0	0	0	-0.00287106811765148	0	0	0	0	0
873	0	0	0	0	0.0307787011388119	-0.0108166576527853	0	0	0.0307787011388119	0	0	0	0	-0.0108166576527853	0	0	0	0	0	0	0	0.0307787011388119	0	0	0	0	0	0	0	0	-0.0216333153055706	0	0	0	0	0	-0.0108166576527853	0	-0.0108166576527853	0	0	0	0	0	0	0.0615574022776239	0	0	0
874	0	-0.0523502016977614	0	0	0	0	0	0	0	0	0	0	0	0	0	0.0150806816468104	-0.00842886041807148	0	0	0	0	0	0	0	0.00665182122873892	0	0	0	0	0	0	0	0	0	0.0754034082340522	0	0	0	0.0150806816468104	0	0	0	0	0	0	0	0	0	0.0301613632936209
875	0	0	0	0	0	0	0	0	0	0	0	0	0	0	0	0	0	0	0	0	0	0	0	0	0	0	0	0	0	0	0	0	0	0	0	0	0	0	0	0	0	0	0	0	0	0	0	0	0
876	0	0	0	0	0	0	0	0	0	0	0	0	0	0	0	0	0	0	0	0	0	0	0	0	0	0	0	0	0	0	0	0	0	0	0	0	0	0	0	0	0	0	0	0	0	0	0	0	0
877	0	0	0	0	0	0	0	0	0	0	0	0	0	0	0	0	0	0	0	0	0	0	0	0	0	0	0	0	0	0	0	0	0	0	0	0	0	0	0	0	0	0	0	0	0	0	0	0	0
878	0	0	0	0	-0.00961446014806269	0	0	-0.0128192801974169	0	-0.00961446014806269	0	-0.00320482004935423	0	-0.00320482004935423	0	0	0	0	0	0	0	-0.00320482004935423	0	0	-0.00320482004935423	0	0	0	0	0	0	0	0.00553189135365381	0	0	0	0	0	0	0	0	0	0	0	0	0	0	0	0
879	0	0	0	0	0	0	0	0	0	0	0	0	0	0	0	0	0	0	0	0	0	0	0	0	0	0	0	0	0	0	0	0	0	0	0	0	0	0	-0.0512832466957272	0	-0.0046621133359752	-0.0139863400079256	0	0	-0.0046621133359752	0	0	-0.05827641669969	0
880	0	0	0	0	0.0126342387871131	0	0	0	0	0	0	0	0	0	0	0	0	0	0	0	0	0	0	0	0	0	0	0	0	0	0	0	0	0	0	0	0	0	0	0.0252684775742262	0	0	0	0	0	0	0	0	0
881	0	0	0	0	0	0	0	0	0	0	0.0237304224015187	0	0	0	0	0	0	0	0	0	0	0	0	0	0	0	0	0	0	0	0	0	0	0	0	0	0	0	0	0	0	0	0	0	0	0	0	0	0
882	0	0	0	0	0	0	0	0	0	0	0	0	0	0	0	0	0	0	0	0	0	0	0	0	0	0	0	0	0	0	0	0	0	0	0	0	0	0	0	0	0	0	0	0	0	0	0	0	0
883	0	0	0	0.00403502400839285	-0.00652237718907284	0	-0.00108706286484547	0	0	0	0	0	0	0	0	0	0	0	0.00403502400839285	0	0	0	0	0	0	0	0	0	-0.00108706286484547	0	0	0	-0.00217412572969095	0	0	0	0	-0.00108706286484547	0	0	0	0	0	0	0	0	0	0	0
884	0	0	0	0	0	0	0	0	0	0	0	0	0	0	0	0	0	0	0	0	0	0	0	0	0	0	0	0	0	0	0	0	0	0	0	0	0	0	0	0	0	0	0	0	0	0	0	0	0
885	0	0	0	0	0	0	0	0	0	0	0	0	0	0	0	0	0	0	0	0	0	0	0	0	0	0	0	0	0	0	0	0	0	0	0	0	0	0	0	0	0	0	0	0	0	0	0	0	0
886	0	0	0	0	0	0	-0.0082223318533136	0	0.0124559146313845	0	0	0	0	0	0	0	0	0	0	0	0	0	0	0	0	0	0	0	0	0	0	0	0.0206782464846981	0	0	0	0	0	0	0	0	0	0	0	0	0	0	0.198804966696495	0
887	0	0	0	0	0	0	0	0	0	0	0	0	0	0	0	0	0	0	0	0.0015609025138335	0	0	0	0	0	0	0	0	0	0	-0.00029085832291091	0	0	0	0	0	0	0	0	0	-0.00029085832291091	0	0	0	0	0	0	0	0
888	0	0	0	-0.0201045436268597	0	0.0380952380952381	0	0	0	0	0	0	-0.0201045436268597	0	0	0	0	0	0	0	0	0	0	0	0	0	0	0	0	0	0	0.0179906944683784	0	0	0	0	0	0	0	0	0	0	0	0	0	0	0	0	0
889	0	0	0	0	0	0	0	0	0	0	0	0	0	0	0	0	0	0	0	0	0	0	0	0	0	0	0	0	0	0	0	0	0	0	0	0	0	0	0	0	0	0	0	0	0	0	0	0	0
890	0	0.00476758045292014	0.0190703218116806	0	-0.00122803354987658	0.00476758045292014	0	0	0	0	0	0	0	0	0	-0.00122803354987658	0	0	0	0	0	0	0	0	0	0.0143027413587604	0	0	0.00476758045292014	-0.00122803354987658	0	0	0	0	0	0.00476758045292014	-0.00245606709975317	0	0.00476758045292014	0	0.00707909380608712	-0.00368410064962975	0	0	0.0143027413587604	-0.00122803354987658	0.00953516090584029	0	-0.00368410064962975
891	0	0	0	0	0	0	0	0	0	0	0	0	0	0	0	0	0	0	0	0	0	0	0	0	0	0	0	0	0	0	0	0	0	0	0	0	0	0	0	0	0	0	0	0	0	0	0	0	0
892	0	0	0	0	0	0	0	0	0	0	0	0	0	0	0	0	0	0	0	0	0	0	0	0	0	0	0	0	0	0	0	0	0	0	0	0	0.0408997955010225	0	0	0	0	0	0	0	0	0	0	0	0
893	-0.000699863526612311	0	0	0	0	0	0	0	0	0	0	0	0	0	0	0	0	0	0	0	0	0	0	0	0	0	0	0	0	0	0	0	0	0	0	0	0	0	0.00133962061944057	0	0	0	0	0	0	0	0	0	0
894	0	0	0	0	0	0	0	0	0	0	0	0	0	0	0	0.0227645463629342	0.0194552529182879	0	-0.00807297973682086	0	0	0	0	0	0	0	0	0	0.0227645463629342	0	0	-0.0161459594736417	-0.0242189392104626	0	0	-0.00807297973682086	0	0	0	0	0	0	0	0	0	-0.00807297973682086	0	0	0
895	0	0	0	0	0	0	0	0	0	0	0	0	-0.00658457891617831	0	0	0	0	0	0	0	0	0	0	0	0	0	0	0	0	0	0	0	0	0	0	0	0	0	0	0	0	0	0	0	0	0	0	0	0
896	0.0519615484541439	0	0	0	0	0	0	0	0	0	0	0	0	0	0	0	0	0	0	0	0	0	0	0.0612394664928077	0	0	0	0	0	0	0	0	0	0	0	0.0519615484541439	0	0	0	0	0	0	0.0352586922657357	0	0	0	0	0.0092779180386638	0
897	0	0	0	0	0	0	0	0	0	0	0	0	0	0	0	0	0	0	0	0	0	0	0	0	0	0	0	0	0	0	0	0	0	0	0	0	0	0	0	0	0	0	0	0	0	0	0	0	0
898	0	0	0	0	0	0	0	0	0	0	0	0	0	0	0	0	0	0	0	0	0	0	0	0	0	0	0	0	0	0	0	0.0262123197903014	0	0	0	0	0	0	0	0	0	0	0	0	0	0	0	0	0
899	0	0	0	0	0	0	0	0	0	0	0	0	0	0	0	0	0	0	0	0	0	0	0	0	0	0	0	0	0	0	0	0	0	0	0	0	0	0	0	0	0	0	0	0	0	0	0	0	0
900	0	0	0	0	0	0	0	0	0	0	0	0	0	0	0	0	0	0	0	0	0	0	0	0	0	0	0	0	0	0	0	0	0	0	0	0	0	0	0	0	0	0	0	0	0	0	0	0	0
901	0	0	0.00598408234097301	0	0	0	0	0	0	0	0	0	0	0	0	0	0.0021655394969223	0	0	0	0	0	0	0	0	0	0	0	-0.00381854284405071	0	0	0	0	0	0	0	0	0	0	0	0	0	0	0	0	0	0	0	0
902	0	0	0	0	0	0	0	0	0	0	0	0	0	0	0	0	0	0	0	0	0	0	0	0	0	0.036051728611106	0	0	0	0	0	0	0	0	0	0	0	0	0	0	0	0	0	0	0	0	0	0	0
903	0	0	0	0	0	0	0	0	0	0	-0.0158152775581211	0	0	0	0	0	0	0	0	0	0	0	0	0	0	0	0	0	0	0	0	0	0	0	0	0	-0.00790763877906057	0	0	0	0	0	0	0	0	0	0	0	0
904	-0.155957579538366	-0.0935745477230193	-0.0183495663816166	0.007334332670497	0	0	-0.0623830318153462	-0.0935745477230193	0.132100396301189	0.051367798104227	-0.0183495663816166	-0.0311915159076731	-0.0935745477230193	-0.0183495663816166	0	-0.0311915159076731	0.220167327168648	-0.0935745477230193	-0.187149095446039	0.0697173644858428	0	-0.187149095446039	0.007334332670497	-0.0311915159076731	0	0	0	0	0	0.0440334654337296	-0.0311915159076731	-0.124766063630692	0	0	0	-0.0623830318153462	0.0568754149597862	0	-0.0311915159076731	0	0	-0.0311915159076731	-0.187149095446039	-0.124766063630692	0	-0.0311915159076731	-0.0495410822892897	0	-0.0311915159076731
905	0	0	0	0	0	0	0	0	0	0	0	0	0	0	0	0	0	0	0	0	0	0	0	0	0	0	0	0	0	0	0	-0.00115924556298761	0	0	0	0	0	-0.00231849112597522	0.00276182059213433	0	0	0	0	0	0	0	0	0	0
906	0	0	0	0	0	0	0	0	0	0	0	0	0	0	0	0	0	-0.0431965442764579	0	0	0	0	0	0	0	0	0	0	0	0	0	0	0	0	0	0	0	0	0	-0.0431965442764579	0	0	0	0	0	0	0	0	0
907	0	-0.0283205890682526	0	0	0.164338537387017	0	0.284799941916031	0.0410846343467543	0.123253903040263	0	0	0	0.284799941916031	0	0	0	-0.0566411781365052	0	0	0.136017948318764	0	0	0	0	0	0	0	0	0	0	0	0	0	0	0	0	0	0	0	0	0	0	0	0	0	0	0	0	0
908	0	0	0	0	0	0	0	0	0	0	0	0	0	0	0	0	0	0	0	0	0	0	0	0	0	0	0	0	0	0	0	0	0	0	0	0	0	0	0	0	0	0	0	0	0	0	0	0	0
909	0	0	0	0	-0.0252365930599369	0	0	0	0	0	0	0	-0.0126182965299685	0	0	0	0	-0.0126182965299685	0	0	-0.0126182965299685	0.0251889168765743	0.0881373709763285	0	-0.0126182965299685	0	0	0	-0.0126182965299685	0	0	0	0	0	0	0	-0.0252365930599369	0	0	-0.0126182965299685	0	0	0	0	-0.0378548895899054	0	0.0251889168765743	0	0
910	0	0	0	0	0	0	0	0	0	0	0	0	0	0	0	0	0	0	0	0	0	0	0	0	0	0	0	0	0	0	0	0	0	0	0	0	0	0	0	0	0	0	0	0	0	0	0	0	0
911	0	0.0361990950226244	0.00743040385689594	0	0	0.024132730015083	0.0120663650075415	0	0	0.00371520192844796	0.312965556172169	0	-0.00231798057532278	0	0.00603318250377074	0	0	-0.0139078834519367	0	-0.0101926815234888	0	0	-0.00231798057532278	0.00603318250377074	-0.0162258640272595	0	-0.00463596115064556	-0.0426444095780077	-0.0402942639630273	0	0	0	0	-0.00787470094816596	0	0	0	0	-0.00463596115064556	0	0	0	-0.00927192230129112	0	0	0	0	0	0
912	0	0	0.00689179875947622	0	0	0	0	0	0	0	0	0	0	0	0	0.00689179875947622	0.0206753962784287	-0.00276755320621039	0	0	0	0	0	-0.00553510641242078	0	-0.00553510641242078	0	0.0137835975189524	-0.00276755320621039	0	0	0	0.011016044312742	0	0	0	0	0	0	0	0	0	0	0	0	0	0	0	0
913	0	0	0	0	0	0	0	0	0	0	0	0	0	0	0	0	0	0	0	0	0	0	0	-0.00447587503356906	0	0	0	-0.00447587503356906	0	-0.00447587503356906	0	0	0	0	0	0.0184314809694959	-0.00447587503356906	0	-0.00447587503356906	0	0	0.00921574048474795	-0.00447587503356906	0	0	0	0	0	0
914	0	0	0	0	0	0	0	0	0	0	0	0	0	0	0	0	0	0	0	0	0	0	0	0	0	0	0	0	0	0	0	0	0	0	0	0	0	0	0	0	0	0	0	0	0	0	-0.00688420762770205	0	-0.00688420762770205
915	0	0	0	0	0	0	0	0	0	0	0	0	0	0	0	0	0	0	0	-0.00524631446408898	0	0	0	0	0	0	0	0	0	0	0	0	0	0	0	0	0	0	0	0	0	0	0	0	0	0	0	0	0
916	-0.000423407669606527	0	0	0	0	0	0	0	0	0	0	0	-0.000635111504409791	0	-0.000409981302647321	0	0	0	-0.00142822137578602	0	0	0	0	0	0	0	0	0	0	0	-0.000211703834803264	0	0	0	0	0	0	0	0	0	0	0	0	0	0	0	0	0	0
917	0	0	0	0	0	0	0	0	0	0	0	0	0	0	0	0	0	0	0	0	0	0	-0.00260348867482426	0	0	0	0	0	0	0	0	0	0	0	0	0	0	0	0	0	0	0	0	0	0	0	0	0	0
918	0	0	0	0	0	0	0	0	0	0	0	0	0	0	0	0	0	0	0	0	0	0	0	0	0.00255030476141899	0	0	0	0	0	0	0	0	0	0	0	0	0	0	0	0	0	0	0	0	0	0	0	0
919	0	0	0	0	0	0	0	0	0	0	0	0	0	0	0	0	0	0	0	0	0	0	0	0	0	0	0	0	0	0	0	0	0	0	0	0	0	0	0	0	0	0	0	0	0	0	0	0	0
920	0	-0.0357142857142857	0	0	0	0	0.0524691358024691	0	0	0	-0.0357142857142857	0	0	0	0	0	0	0	0	0	0	0	0	0	0	0	0	0	0	0	0	0	-0.0357142857142857	0	0	0	0	0	0	0	0	0	0	-0.0357142857142857	0	-0.0178571428571429	0	0	0
921	0	0	0	0	0	0	0	0	0	0	-0.00860215053763441	0	0	0	0.0628930817610063	0	0	0	0	0	0	0	0	0	0	0	0	0	0	0	0	0	0	0	0	0	0	0	0	0	0	0	0	0	0	0	0	0	0
922	0	0	0	0	0	0	0	0	0	0	0	0	0	0	0	0	0	0	0	0	0	0	0	0	0	0	0	0	0	0	0	0	0	0	0	0.0237473284255521	0	0	0	0	0	0	0	0	0	0	0	0	0
923	0	0	0	0	0	0	0	0	0	0	-0.0558035714285714	0	-0.111607142857143	0	0	0	0	-0.0558035714285714	0	0	0	0	0.0893343095583666	0	0	0	0	-0.111607142857143	0	-0.0558035714285714	0	0	0	0	0	-0.0558035714285714	0	0	0	0	0	0	0	0	0	0.0725689404934688	0.217706821480406	0	0
924	0.00906864967806294	-0.0014445230907016	0	0.0276074601680421	0	0	0	0.00762412658736134	0	0	0	0	0	0	0	0	0	0	0	0.00906864967806294	0	0	0.00762412658736134	0	0	0	0	0	0	0	0	0	0	0	-0.00722261545350802	0	0	-0.00288904618140321	0	0	0	0	0	0	0	-0.00288904618140321	0	0	0
925	0	0	0	0	0	0	0	0	0	0	0	0	0	0	0	0	0	0	0	0	0	0	0	0	0	0	0	0	0	0	0	0	0	0	0	0	0	0	0	0	0	0	0	0	0	0	0	0	0
926	0	0	0	0.033101621979477	0	0	0	0	0	0	0	0	0	0	0	0	0	0	0	0	0	0	0	0	0	0	0	0	0	0	0	0	0	0	0	0	0	0	0	0	0	0	0	0	0	0	0	0	0
927	0	0	0	0	0	0	0	0	0	0	0	0	0	0	0	0	0	0	0	0	0	0	0	0	0	0	0	0	0	0	0	0	0	0	0	0	0	0	0	0	0	0	0	0	0	0	0	0	0
928	0	0	0	0	0	0	0	0	0	0	0	0	0	0	0	0	0	0	0	0	0	0	0	0	0	0	0	0	0	0	0	0	0	0	0	0	0	0	0	0	0	0	0	0	0	0	0	0	0
929	0	0	0	0	0.00430089028428885	0	0	0	0	0	0	0	0	0	0	0	0	0	0	0	0	0	0	0	0	0	0	-0.00216370599562931	0	0	0	0	0	0	0	0	0	0	0	0	0	0	0	0	0	0	0	0	0
930	0	0	0	0.0154176382693616	-0.00793084304861607	0	0.0233484813179776	0	0.0310573004526584	0	0.00770881913468073	0	0	-0.00793084304861607	0	-0.0158616860972321	-0.00793084304861607	0	0	0.0156396621832968	-0.0237925291458482	0	-0.00793084304861607	0	0	-0.0158616860972321	0	0	0	0	-0.0158616860972321	-0.0317233721944643	-0.0158616860972321	0	0	0	-0.00793084304861607	0	0	0	0	0	0	0	0	0	0	0	0
931	0	0	0	0	0	0	0	0	0	0	0	0	0	0	0	0	0	0	0	0	0	0	0	0	0	0	0	0	0	0	0	0	0	0	0	0	0	0	0	0	0	0	0	0	0	0	0	0	0
932	0	0	0	0	0	0	0	0	0	0	0	0	0	0	0	0	0	0	0	0	0	0	0	0	0	0	0	0	0	0	0	0	0	0	0	0	0	0	0	0	0	0	0	0	0	0	0	0	0
933	0.008690992439287	-2.69042504807064	-0.16008537886873	-0.266808964781217	0	-0.32017075773746	-0.0533617929562433	-0.0223354002584786	0	-0.16008537886873	-0.106723585912487	0	0	-0.0533617929562433	0	-0.106723585912487	0	0	0	0	0	-0.0533617929562433	0	0	-0.0533617929562433	0	0	0	0	0	0	0.0843881856540084	-0.0533617929562433	0	-0.106723585912487	0	0	0	0	0	0	-0.106723585912487	0	0	0	0	0	0	0
934	0	0	0	0	0	0	0	0	0	0	0.0229173828348803	0.00815498135103553	-0.00660742013280914	0	-0.00330371006640457	0.0114586914174401	0	0	0	0.0260125052713331	0	0	0.00815498135103553	0	0.068543560874689	0.0229173828348803	0	-0.0165185503320229	0	0.0421138803434524	0	0.0161013750721193	-0.0266382681611883	-0.00330371006640457	0.177444853244652	0.00485127128463096	-0.0165185503320229	0	0.0570848694572489	-0.00330371006640457	0.0572934570872006	0	0	-0.00991113019921372	0	0	0	0.0114586914174401	0
935	0	0	0	0	0	0	0	0	0	0	0	0	0	0	0	0	0	0	0	0	0	0	0	0	0	0	0	0	0	0	0	0	0	0	0	0	0	0	0	0	0	0	0	0	0	0	0	0	0
936	0	0.0176491351923756	0	0	0	0	0	0	0	0	0	0	0	0	0	0	0	0	0	0	0	0	0	0	0	0	0	0	0	0	0	0	0	0	0	0	0	0	0	0	0	0	0	0	0	0	0	0	0
937	0	0	0	0	0	0	0	0	0	0	-0.0273822562979189	0	0	0	0	0	0	0	0	0	0	0	0	0	0	0	0	0	0	0	0	0	0	0	0	0	0	0	0	0	0	0	0	0	0	0	0	0	0
938	0	-0.0260824204486176	0	0	-0.0260824204486176	0	-0.130412102243088	0	0	-0.0782472613458529	-0.0260824204486176	0	0	0	0	0	0	0	0	0	0	0	0	0	0	0	0	0	0	0	0	0	0	0	0	0	0	0	0	-0.0521648408972353	0	0	0	0	0	0	0	0	0
939	0	0.0032305915372387	0	0	0	0.0363901018922853	0	0	0	0	0	0	0	0	-0.0149644594089039	0.0181950509461426	0	0	0	0	0	0	0	0	0	0.0545851528384279	0	0.218340611353712	0	0.0107128212416907	0	0.356753692513033	0.0181950509461426	0	-0.00748222970445193	0.770988226107097	0.0545851528384279	0.177698871294213	0	0	0.0214256424833814	0	0	0	-0.0341805569850209	0	0	0	0.039620693429524
940	0	0	0	0	0.216450216450216	0	0	0	0	0	0	0	0	-0.088809946714032	0	0	0	0	0	0.127640269736184	0	0	0	0	0	0	0	0	0	0	0	0	0	0	0	0	0	0	0	0	0	0	0	0	0	0	0	0	0
941	0	0	0	0	0	0	0	0	0	0	0	0	0	0	0	0	0	0	0	0	0	0	0	0	0	0	0	0	0	0	0	0	0	0	0	0	0	0	0	0	0	0	0	0	0	0	0	0	0
942	0	0	0	0	-0.00098641703739507	0	0	0	0	0	0	0	0	0	0	0	0	0	0	-0.00098641703739507	-0.00295925111218521	0	0.00153966475713344	0	0	0	0	0	0	0.00252608179452851	0	0	0	0	-0.00098641703739507	-0.00197283407479014	0	0	0	0	0	0	0	-0.00098641703739507	0	0	0	0	0
943	0	0	0	0	0	0	0	0	0	0	0	0	0	0	0	0	0	0	0	0	0	0	0	0	0	0	0	0	0	0	0	0	0	0	0	0	0	0	0	0	0	0	0	0	0	0	0	0	0
944	0.0920810313075506	-0.117508813160987	-0.176263219741481	0	-0.0587544065804935	0	0	-0.109609970287367	0	-0.0587544065804935	-0.176263219741481	-0.117508813160987	0.368324125230203	0	0.184162062615101	-0.117508813160987	0.276243093922652	-0.0587544065804935	0	0	-0.109609970287367	0	0.184162062615101	-0.176263219741481	-0.0587544065804935	-0.201691001594917	-0.235017626321974	0.368324125230203	-0.0587544065804935	0.0920810313075506	-0.117508813160987	0.0333266247270571	0	0	0.0920810313075506	0	-0.176263219741481	0	0	0	-0.176263219741481	-0.0587544065804935	0	-0.176263219741481	0	-0.176263219741481	-0.0587544065804935	0.0920810313075506	0
945	0	0	0	0	0	-0.00537316640696362	0	0	0	0	0	0	0	0	0	0	0	0	0	0	0	0	0	0	0	0	0	0	0	0	0	0	0	-0.00268658320348181	0	0	0	0	0	0	0	0	0	0	0	0	0	0	0
946	0	0	0	0	0	0	0	0	0	0	0	0	0	0	0	0	0	0	0	0	0	0	0	0	0	0	0	0	0	0	0	0	0	0	0	0	0	0	0	0	0	0	0	0	0	0	0	0	0
947	0.0956022944550669	0	0	0	0	0	0	0.0956022944550669	0	0	0.0956022944550669	0	0	0	-0.0554938956714761	0	0	0	0	0	0	0	0	0	0	0	0	0	0	0	0	0	0	0	-0.0554938956714761	0	0	0	0	0	0	0	0	0	0	0	0	0	0
948	0	0	0	0	0	0	0	0	0	0	0	0	0	0	0	0	0	0	0	-0.00195641115936925	0	0.00528401585204756	0	0	0	0	-0.00782564463747701	0	0	0.00528401585204756	0	0	-0.00195641115936925	0.00528401585204756	0	-0.00195641115936925	0	-0.00391282231873851	0	0	-0.00195641115936925	0	0	0	0	-0.00586923347810776	0	0	0
949	0	0	0	0	0	0	0	0	0	0	0	0	0	0	0	0	0	0	0	0	0	0	0	0	0	0	0	0	0	0	0	0	0	0	0	0	0	0	0	0	0	0	0	0	0	0	0	0	0
950	0	0	0	0	0	-0.00258819266506199	0	0	0	0	0	0	-0.00258819266506199	0	0	0.0528102602791399	0	0	0	0	0.0900913645679081	0	0	0.00754432289701999	0	0	0	0	0	-0.00258819266506199	0	0	0	-0.00258819266506199	0	0	0	0	0	0	0	0	0	0	0	0	-0.00776457799518596	0	0
951	0	0	0	0	0	0	0	0	0	0	0	0	0	0	0	0	0	0	0	0	0	0	0	0	0	0	0	0	0	0	0	0	0	0	0	0	0	0	0	0	0	0	0	0	0	0	0	0	0
952	0	0	0	0	0	0	0	0	0	0	0	0	0	0	0	0	0	0	0	0	0	0	0	0	0	0	0	0	0	0	0	0	0	0	0	0	0	0	0	0	0	0	0	0	0	0	0	0	0
953	0	0	0	0	0	0	0	0	0	0	0	0	0	0	0	0	0	0	0	0	0	0	0	0	0	0	0	0	0	0	0	0	0	0	0	0	0	0	0	0	0	0	0	0	0	0	0	0	0
954	0	0	0	0	0	0	0	0	0	0	0	0	0	0	0	0	0	0	0	0	0	0	0	0	0	0	0	0	0	0	0	0	0	0	0	0	0	0	0	0	0	0	0	0	0	0	0	0	0
955	0	0	0	0	0	0	0	0	0	0	0	0	-0.012134449702706	0	0	0	0	0	0	0	0	0	0	0	0	0	0	0	0	0	0	0	0	0	0	0	0	0	0	0	0	0	0	0	0	0	0	0	0
956	0	0	0	0	0	0	0	0	0	0	0	0	0	0	0	0	0	0	0	0	0	0	0	0	0	0	0.0619962802231866	0	0	0	0	0	0	0	0	0	0	0.0619962802231866	0	0	0	0.131299204355642	0	0	0	0	0	0	0
957	0	0	0	0	0	0	0	0	0	0	0	0	0	0	0	0	0	0	0	0	0	0	0	0	0	0	0	0	0	0	0	0	0	0	0	0	0	0	0	0	0	0	0	0	0	0	0	0	0
958	0	0	0	0	0	0.021115788552719	0	0	0.0550739450025232	0	-0.0580705942091393	0	0.114000310282284	0	0	-0.0224008956180924	-0.0054218173931902	0	0	-0.0293921101272355	0	0.0194042464114763	-0.0108436347863804	0	0	0	0.0535045478865704	0	0	0.0535045478865704	-0.0108436347863804	0	0.0178348492955235	0	0	-0.0054218173931902	0	0	0	-0.0054218173931902	0	0	0	0	0	0	-0.106866950747851	0	0
959	0	0	0	0	0	0	0	0	0	0	0	0	0	0	0	0	0	0	0	0	0	0	0	0	0	0	0	0	0	0	0	0	0	0	0	0	0	0	0	-0.0080948718986522	0	0	0	0	0	0	0	0	0
960	0	0	0.00016605875484024	0	0	0.0015691342964274	-0.052303670302161	0.0123870156165789	-0.00140307554158716	0.0140476031649815	0	0	-0.010967092325882	0	0	0	0.00297220983801456	0	0	0	0	0.00016605875484024	0	0	0.00173519305126765	0	0	0	0	0	-0.00140307554158716	0	0	0	0	0	0	0	0	0	0.005205579153803	0.0104857638104711	0	0	0	0	-0.00140307554158716	0	0
961	0	0	0	0	0	0	0	0	0	-0.00168438073742189	0	0	0	0	0	0	0	0	0	0	0	0	0	-0.00336876147484377	0	0	0	0	0	0	0	0	0	0	0	0	0	0	0	0	0	0	0	0	0	0	0	0	0
962	0	0	0	0	0	0	0	0	0	0	0	0	0	0	0	0	0	0	0	0	0	0	0	0	0	0	0	0	0	0	0	0	0	0	0	0	0	0	0	0	0	0	0	0	0	0	0	0	0
963	-0.0050945030312293	0	0	0	0	0	0	0	0	0	0	0	0	0	0	0	-0.0101890060624586	0	0	0	0	0	0	0	0	0	0	0	0	0	0	0	0	0	0	0	0	0	0	0	0	0	0	0	0	0	0	0	0
964	0	0	0	0	0	0	0	0	0	0	0	0	0	0	0	0	0	0	0	0	0	0	0	0	0	0	0	0	-0.00791514959632737	0	0	0	0	-0.0158302991926547	0	0	0	0	0.0102657342102681	0	0	0	0	0	-0.00791514959632737	0	0	0	0
965	0	0	0	0	0	0	0	0	0	0	0	0	0	0	0	0	0	0	0	0	0	0	0	0	0	0	0	0	0	0	0	0	0	0	0	0	0	0	0	0	0	0	0	0	0	0	0	0	0
966	0	0	0	0	0	0	0	0	0	0	0	0	0	0	0	0	0	0	0	0	0	0	0	0	0	0	0	0	0	0	0	0	0	0	0	0.00532538076472468	0	0	0	0	0	0	0	0	0	0	0	0	0
967	0	0	0	0	0	0	0	0	0	0	0	0	0	0	0	0	0	0	0	0	0	0	0	0	0	0	0	0	0	0	0	0	0	0	0	0	0	0	0	0	0	0	0	0	0	0	0	0	0
968	0	0	0	0	0	0	0	-0.00562208354416147	0.010418837257762	0	0	0	0	-0.0064474133747224	0	0	0	-0.0218182296158498	0	0	0.0208376745155241	0	0	0	0	0	0	0	0	0	0	0	0	0	0	0	0	-0.0112441670883229	0	0	0	0	0	0	0	0	0	0	0
969	0	0	0	0	0	0.00258458039337314	0	0	0	0	0	0	0	0	-0.00111691909038109	0	0	-0.00111691909038109	0	0	0	0	0	0	0	0	0	0	-0.00223383818076219	0	0	0	0	0	0	0	-0.00111691909038109	0	0	-0.00111691909038109	0	0	0	-0.00335075727114328	0.00146766130299205	0	0	0	0
970	0	0	0	0	0	0	0	-0.00170584422230562	0	0	0	0	0	0	0	0	0	0	0	0	-0.00170584422230562	0	0	0	0	0	0	0	0	-0.00341168844461124	0	0	0	0	0	0	0	0	0	0	-0.00170584422230562	0	0	0	0.00305306222140807	0	0	0	0
971	0	0	0	0	0	0	0	0	-0.00176853423882286	0	0	0	0	0	0	0	0	0	0	0	0	0	0	0	0	0	0	0	0	0	0	0	0	0	0	0	0	0	0	0	0	0	0.00454499565574119	0	0.0189405896836922	0	0	-0.00353706847764573	0.0126270597891281
972	-0.0258531540847983	-0.0517063081695967	0	0	0	-0.0258531540847983	0	0	0	0	0	0	-0.0517063081695967	0	0.0642260757867694	-0.0258531540847983	0	-0.0517063081695967	0	0	0	0	0	0	0	0	0	0	0	-0.0258531540847983	0	0	0	0	0	0	0	0	0	0	0	-0.077559462254395	0	0	0	0	0.0383729217019711	0	0
973	0.0169161803264823	0	0	-0.00639488409272582	0	-0.00319744204636291	0	-0.00319744204636291	0	0	0	0	0	0.00845809016324114	0	0.00845809016324114	0	-0.00319744204636291	0	0	0.00845809016324114	-0.00959232613908873	0.00845809016324114	-0.00639488409272582	0	0	0	-0.00319744204636291	0	0	0	0	0	0.00845809016324114	0	0.0169161803264823	0	0.0507485409794468	0.00845809016324114	-0.00319744204636291	0	-0.00959232613908873	-0.00319744204636291	0	0	0	0	-0.00319744204636291	0
974	0.0208116545265349	0	0	0	0	0	0	0	0	-0.00910912734560029	0	0	0	0	0	0	0	0	0	0	0	0	0	0	0	-0.00910912734560029	0	0.0208116545265349	0	-0.0182182546912006	0	0	-0.00910912734560029	0	-0.0182182546912006	0	0	0	0	0	-0.00910912734560029	-0.0182182546912006	0	0	0	0	-0.00910912734560029	0	0
975	0	0	0	0	0	0	0	0	0	0	-0.0477099236641221	0	0	0	0	0	0	0	0	0	0	0	0	0	0	0	0	0	0	0	0	0	0	0	0	0	0	0	0	0	0	0	0	0	0	0	0	0	0
976	0	0	0	0	0	0	0	-0.00695216907675195	0	0	0	0	0	0	0	0	0	0	0	0	0	0	0	0	0	0	0	0	0	0	0	0	0	0	0	0	0	0	0.00571247124746285	0	0	0	0	0	0	0	0	0	0
977	0	0	0	0	0	0	0	0	0	0	0	0	0	0	0	0	0	0	0	0	0	0	0	0	0	0	0	0	0	0	0	0	0	0	0	0	0	0	0	0	0	0	0	0	0	0	0	0	0
978	0	0	-0.0080006400512041	0.131882624464227	0	0.0494559841740851	0	-0.0370989125222999	-0.0080006400512041	0	0	0	0	0	0.0164853280580284	-0.567817268441152	0	0.0744260002389377	0	0	0	0	0	-0.0160012801024082	-0.0080006400512041	0	0	0	0	0	0	0	0	0	-0.0080006400512041	0	0	0.0164853280580284	0	0	0	0	0	0.0494559841740851	0.167273520358384	0	0	0.565341633529166	0
979	0.249875062468766	0.0535463126905224	-0.0892361243971979	-0.0696055684454756	0.32662323130778	0.0303444565420306	-0.139211136890951	0.337337131898088	0	0.0267731563452612	0.130294481529536	-0.08209352400366	0.364110288243349	0.126723181332767	0.199900049975012	0.0499750124937531	0	-0.0232018561484919	0	0	0.0767481688390143	0	0	0	0	0	0	0.0499750124937531	-0.0232018561484919	0	0	0	0	0	0	0	0	0	-0.0232018561484919	0	0	-0.0232018561484919	0	0	0	0	0	-0.0232018561484919	0
980	0	0	0	0	0	0	0	0	0	0	0	0	0	0	0	0	0	0	0	0	0	0	0	0	0	0	0	0	0	0	0	0	0	0	0	0	0	0	0	0	0	0	0	0	0	0	0	0	0
981	0	0	0	0	0	0	0	0	0	0	0	0	0	0	0	0.0484261501210654	0	-0.0203334688897926	0	-0.0203334688897926	0	0	0	0.0242130750605327	0	0	0	0	0	0	0	0	0	-0.0406669377795852	0	0	0	0	0	0.0382594156761691	0	0	0	0	0	0	0	0	0
982	-0.045045045045045	0	0	-0.256560908734826	0	0	-0.135135135135135	0	0	0	0	0	0	0	0	0	0	0	0	0.05810157984071	0	0	0	-0.045045045045045	0	-0.135135135135135	0	0.0515733124428777	0	0	0	0	0	-0.0900900900900901	0	0	0	0	0	0	0	0.289855072463768	0	0	0	0	0	0.0966183574879227	0
983	0	0	0	0	0	0	-0.0489596083231334	0	0	0	0	0	0	0	0	0	0	0	0	0	0	0	0	0	0	0	0	0	0	0	0	0	0	0	0	0	0	0	0	0	0	0	0	0	0	0	0	0	0
984	0	0	0	0	0	0	0	0	0	0	0	0	0	0	0	0	0	0	0	0	0	0	0	0	0	0	0	0	0	0	0	0	0	0	0	0	0	0	0	0	0	0	0	0	0	0	0	0	0
985	0	0	0	0	-0.0133014099494546	0	0	0	0	0	0	0	0	0	0	0	0	0	0	0	0	0.0131492439184747	0	0	0	0	0	0	0	0	0	0	0	0	0	0	0	0	0	0	0	0	0	0	0	0	0	0	0
986	0	0	0.0189681335356601	0	0.0569044006069803	0	0.0223071970009894	0.0189681335356601	0.0327265770478766	-0.0104193800468872	0	0	0	-0.00520969002344361	0	-0.00520969002344361	0	0	0	0	0	0	0	0	0	0	0	0	0	0	0	0	0	0	0	0	0	0	0	0	0	0	0	0	0	0	0	0	0
987	0	0.0578871201157742	0	-0.0107480653482373	0	0	0	0	0	0	0	-0.0107480653482373	0	0	0	0	0	0	-0.0107480653482373	0	0	0	-0.0107480653482373	0	-0.0214961306964746	0	0	0	-0.0214961306964746	0	0	0	-0.0214961306964746	-0.0107480653482373	0	0	0.0578871201157742	-0.0107480653482373	-0.032244196044712	0	0	0	0	0	0	0.0471390547675369	0	0	0
988	0	0	0	0	0	0	0	0	0	0	0	0	0	0	0	0	0	0	0	0	0	0	0	0	0	0	0	0	0	0	0	0	0	0	0	0	0	0	0	0	0	0	0	0	0	0	0	0	0
989	0	0	0	0	0	0	0	0	0	0	0	0	0	0	0	0	0	0	0	0	0	0	0	0	-0.00169339406973397	0	0	0	0	0	0	0	0	0	0	0	0	0	0	0	0	0	0	0	0	0	0	0	0
990	0	0	0	0	0	0	0	0	0	0	0	0	0	0	0	0	0	0	0	0	0	0	0	0	0	0	0	0	0	0	0	0	0	0	0	0	0	0	0	0	0	0	0	0	0	-0.0230733733271804	0	0	0
991	0	-0.00458358161067058	0	0	0	0	0	0.00542943531132802	-0.277769543363699	-0.0275014896640235	0	0	0	-0.00458358161067058	0	0	0	0	0	0	0	0	0	0	0	0	0	0	0	0	0	0	0	0	0	0	0	0	0	0	0	-0.00458358161067058	0	0	-0.00458358161067058	0	0	0	0
992	-0.151285930408472	-0.680786686838124	-0.075642965204236	0	-0.151285930408472	0	0	-0.075642965204236	0	0	0	0	0	0	-0.075642965204236	0	0	0	0	0	0	0	0	0	0	0	0	0	0	0	0	0	0	0	0	0	0	0	0	0	0	0	0	0	0	0	0	0	0
993	0.0055118832813416	0.0662288138812952	0	-0.4371499179647	-0.00788643533123028	0	-0.0315457413249211	-0.0236593059936909	-0.881841413239856	-0.0157728706624606	-0.13928610882667	-0.0157728706624606	-0.0918812823340926	0	0	0	-0.179862454255168	0	-0.59195025393825	-0.0473186119873817	0	-0.204284539430423	0.0185288123031314	-0.0630914826498423	0.0291711892750324	0	0	-0.170745635646396	0	0	0	-0.0315457413249211	0	-0.00788643533123028	-0.0157728706624606	0	-0.051686326496377	0	-0.0051304936905595	0.0370576246062627	0	-0.00788643533123028	0	0	-0.0157728706624606	0	0.070891703475876	0	-0.069452359617945
994	0	0	0	0	0	0	0	0	0	0	0	0	0	0	0	0	0	0	0	0	0	0	0	0	0	0	0	0	0	0	0	0	0	0	0	0	0	0	0	0	0	0	0	0	0	0	0	0	0
995	0	0	0	0	0	0	0	0	0	0	0	0	0	0	0	0	0	0	0	0	0	0	0	0	0	0	0	0	0	0	0	0	0	0	0	0	0	0	0	0	0	0	0	0	0	0	0	0	0
996	0	0	0	0	-0.0403958796202787	0	0	0	0	0	0	0	0	0	0	0	0	0	0	0	0	0	0	0	-0.0201979398101394	0	0	0	0	0	0	0	0	0	0	0	0	0	0	0	0	0	0	0	-0.0201979398101394	0	0	0	0
997	0	0	0	0	0	0	-0.205338809034908	0	0	0	0	0	0	0	0	0	0	0	0	0	0	0	0	0	0	0	0	0	0	0	0	0	0	0	0	0	0	0	0	0	0	0	0	0	0	0	0	0	0
998	0.0481174064717912	-0.00603791812583021	0	-0.114720444390774	-0.0120758362516604	-0.108682526264944	0	0	-0.00603791812583021	0	-0.0181137543774906	0	0	0	0	0	0	0	0	0	0	0	0	0	0	-0.00603791812583021	0	0	0	0	-0.0120758362516604	0	0	0	0	0	0.0120293516179478	0	0	0	0	0	0	0	0	0.0177883619415022	-0.00603791812583021	0	0.0240587032358956
999	0	-0.0018772292096865	0	0	0	0	0	0	0	0	0	0	0	0	0	0	0	0	0	-0.0018772292096865	0	-0.0018772292096865	0	0	0	0	0	0	0	0	0	0	0	0	0	0	0	0	0	0	0	0	0	0	0	0	0	0	0
1000	0	0	0	0	0	0	0	0	0	0	0	0	0	0	0	0	0	0	0	0	0	0	0	0	0	0	0	0	0	0	0.0625782227784731	0	0	0	0	0	0	0	0	0	0	0	0	0	0	0	0	0	0
1001	-0.00784698381559588	-0.00392349190779794	0	0	-0.00588523786169691	-0.0255026974006866	0	-0.00392349190779794	0	0	0	-0.0156939676311918	0	-0.00392349190779794	0	-0.00196174595389897	0	0	0	0.00426967251611801	0	0	0	0	0	-0.00392349190779794	0	0	0	0	0	0	0	0	0	0	0	0	-0.00715462259895577	0	-0.00196174595389897	0	0	0	0	0	0	0	0
1002	0	-0.000731519707210601	0	-0.00723955693911533	0	0	0.0137475941710201	-0.00723955693911533	0	-0.0144791138782307	-0.00723955693911533	0	0	-0.00723955693911533	0	0	0	0	0	0	-0.00723955693911533	0	0	0	0	0	0	-0.021718670817346	0	0	0	0	0	0	0	0	0	0	0	0	0	0.0137475941710201	0	0	0	0	0	0	0
1003	0	0	0	0	0	0	0	0	0	0	0	0	0	0	0	0	0	0	0	0	0	0	0	0	0	0	0	0	0	0	0	0	0	0	0	0	0	0	0	0	0	0	0	0	0	0	0	0	0
1004	0	0	0	0	0	0	0	0	0	0	0	0	0	0	0	0	0	0	0	0	0	0	0	0	0	0	0	0	0	0	0	0	0	0	-0.00634276290752252	0	0	0	0	0	0	0	0	0	0	0	0	0	0
1005	0	0.0129218482267929	0	0	0	0	0.0258436964535859	0	-0.0142816338189089	0	-0.0285632676378178	-0.0326426244141654	0	0	0	0	0	0	0	0	0	0	0	0	0	0	0	0	0	0.0816104461371056	0	0	0	0	0	0	0	0	0	0	0	0	0	0	0	0	0	0	0
1006	0	0	0	0	0	0	0	0	0	0	0	0	0	0	0	0	0	0	0	0	0	0	0	0	-0.0089541547277937	0	0	0	0.121193758521436	0.030298439630359	0.0151492198151795	-0.0089541547277937	0	0	0	0	0.151492198151795	0.0151492198151795	0	0	0.042637023391003	-0.0268624641833811	0	0	0	0	0.0254571461561137	0	0
1007	-0.0188412623645784	0.010473987869001	-0.237953752160186	-0.355877271553567	0.0758917278016696	-0.0565237870937353	-0.00942063118228921	-0.0188412623645784	-0.0376825247291569	0	0	-0.00942063118228921	0	0	0.0252972426005565	0	0	-0.00942063118228921	0.0064559802359781	-0.00942063118228921	-0.260286343814431	-0.0282618935468676	0	0	-0.150730098916627	0.0129119604719562	0	0	0	0	0	-0.0753650494583137	0.0099473095256451	0.0793830570913369	0	0	0	0	0	0	0	0	0	0	0	0	0	0	0
1008	0	0	0	0	0	0	0	0	-0.00886210563629919	0	0	0	0	0	0	0	0	0	0	0	0	0	0	0	0	0	0	0	0	0	0	0	0	0	0	0	0	0	0	0	0	0	0	0	0	0	0	0	0
1009	-0.11219843907764	-0.032089631841873	-0.263184658005202	0.0373482475285846	-0.048326568377668	0.0573658433067836	-0.0107093519882816	0.102774922918808	0	-0.0827957512635811	-0.142886962721149	-0.205626694083559	-0.005412312178598	0.093274558514031	-0.04945870771523	0.00374223511943195	0.054640475155998	0.360124603392719	0.0478654789020069	-0.255200674167705	0.23846422403327	-0.101565935335302	-0.287251881886606	0.1488934765157	-0.100241675382881	-0.142963810967092	0.45597083356565	-0.04552435198094	-0.049497131838202	-0.026754167909218	0.176185582146528	-0.077498711453897	-0.150947794804589	0.019979171655227	-0.017484348242273	-0.165706774896077	-0.200483350765763	-0.343293465240969	-0.29909337321245	-0.054871019893829	0.334963664296726	0.047980751270923	-0.106824551022014	-0.0120336119407024	0.00128583582944899	-0.0774602873309261	-0.0574426915527271	0.056003159231391	0.041282603262875
1010	0	0	0	0	0	0	0	0	0	0	0	0	0	0	0	0	0	0	0	0	0	0	0	0	0	0	0	0	0	0	0	0	0	0	0	0	0	0	0	0	0	0	0	0	0	0	0	0	0
1011	0.031955688112484	0	0	0	0	0	0	0.0213037920749893	0	0	0.00532594801874734	0	0	0.0224952307221821	0	0	0.0341518342635441	0	0	0	0	0	0.00256960843771096	-0.019854570497231	0.00394777822822915	0	0	0.0045790234454456	0	0.0085268016736747	-0.00137816979051819	0.00532594801874734	-0.00137816979051819	0	0.00532594801874734	0	0	0.00633065552261466	-0.00551267916207277	-0.00137816979051819	0	0	-0.00413450937155458	0	-0.00551267916207277	0	-0.00137816979051819	0	0
1012	0	0	0	0	0	0	0.102145045965271	0	0	0	0	0	0	0	0	0	0	0	-0.0255885363357216	0	0	0	0	0.204290091930541	0	0	0	0	0	0	0	0	0	0	-0.0511770726714432	0	0	0	-0.0255885363357216	-0.0511770726714432	0	0	0	0	0	0	0	0	0
1013	0	0	0	0.010930151517721	0	-0.0059765718383935	0	0	0	0	0	0	0.011441647597254	0	0	0	0	0	0	-0.0179297155151805	0	0	0.022883295194508	0	0.0283483709533685	0	0.022883295194508	0	0	0	0	0	0.011441647597254	0	0	0.04474359822995	0	0	0	0	0.102652066143281	0.034324942791762	0	0	0	-0.0059765718383935	0.034324942791762	0	0
1014	0	0	0	0	0	-0.00427222625710258	0	0	0	0	0	0	0	-0.00427222625710258	0	0	0	0	0	0	0	0	0	0	0	0	0	0	0.00953652489032996	0	0	0	0	0	0	0	0	0	0	0	0	0	0	0	0	0	0	0	0
1015	0	0	0	0	0	0	0	0	0	0.0309166795486165	0	0	0	0	0	0	0	0	0	0	0	0	0	0	0	0	0	0	0	0	0	0	0	0	0	0	0	-0.0065483596359112	0	0	0	0.0154583397743082	0	0	0	0	0	0	0
1016	0	0	0	0	0	0	0	0	-0.0459558823529412	0	0	0	0	0	0	0	0	0	0	0	0	0	0	0	-0.0459558823529412	0	0	0	0	0	0	0	0.115207373271889	0	0	0	0	0	0	0	0	0	-0.0459558823529412	0	0	0	0	0	0
1017	0	0	0	0	0	0	0	-0.00538491905543248	0	0	0	-0.00375586854460094	0	0	0	0	0	0	0	0	0	0	0.00266983487071325	0	0	0	-0.00859777076308955	0	0	0	0	0	0	0	0	0	0	0	0	0	0	0	0	-0.00805475392614573	0	-0.010769838110865	-0.00187793427230047	0	0
1018	0	0	0	0	0	0	0	0	0	0	0	0	0	0	0	0	0	0	0	0	0	0	0	0	0	0	0	0	0	0	0	0	0	0	0	0	0	0	0	0	0	0	0	0	0	0	0	0	0
1019	0	0	0	0	0	0.0525762355415352	0	0	0	0	-0.0611620795107034	0.0525762355415352	0	0	0	0	0	0	0	0	0	0	0	-0.0203873598369011	0	0	0	0	-0.0611620795107034	0	0	0	0	0	0.0321888757046341	-0.0815494393476045	-0.0407747196738022	1.64693851956897	0.488203307640115	0.73712846930802	1.88193982191609	-0.101936799184506	-0.0203873598369011	-0.0407747196738022	0	0	0	0	-0.380928493103992
1020	0	0	0	0	0	0	0	0	0	0	0	0	0	0	0	0	0	0	0	0	0	0	0	0.0194895797190252	0	0.0386100386100386	0	0	0	0	0	0	0	0	0	0	0	0	0	0	0	0.0386100386100386	0	0	0	0	0	0	0
1021	0	0	0	0	0.0407996736026112	0	0	0.0101999184006528	0	0	0	0	0	0	0	0	0	0	-0.00750694392312889	-0.00375347196156445	0	0	0	0	0	0.0101999184006528	0	0	0	0	0	0	0	0	-0.00375347196156445	0	0	0	0	0	0	0	0	0	0	0	0	0	0
1022	0	0	0	0	0	0	0	0	0	0	0	0	0	0	0	0	0	0	0	0	0	0	0	0	0	0	0	0	0	0	0	0	0	0	0	0	0	0	0	0	0	0	0	0	0	0	0	0	0
1023	-0.105615208590037	0	0	0	-0.0176025347650062	0	0.187178287318671	0	0	-0.0176025347650062	0	0	0	-0.0176025347650062	0	0	0	0	-0.0176025347650062	0	0	0	0	0	0	0	0	0	0	0	0	0	-0.0176025347650062	0	0	0	0	0	0	0	0	0	0	0	0	0	0	0	0
1024	0	0	0	0	0	0	0	0	0	0	0	0	0	0	0	0	-0.0195503421309873	0	0	0	0	0	0	-0.00977517106549365	0	0	0	0	0	0	0	0	0	0	0	0	0	0	0	0	0	0	0	0	0	0	0	0	0
1025	0	0	0	0	0	0	0	0	0	0	0	0	0	0	0	0	0	0	0	0	0	0	0	0	0	0	0	0	0	0	0	0	0	0	0	0	0	0	0	0	0	0	0	0	0	0	0	0	0
1026	0	0	0	0	0	0	-0.00830771786990114	0	0	0	0	0	0	0	0	0	0	0	0	0	0	0	0	0	0	0	0	0	0	0	0	0	0	0	0	0	0	0	0	0	0	0	0	0	0	0	0	0	0
1027	0	0	0	0	0	0	0	0	0	0	0	0	0	0	0	0.00290132590593901	0	-0.00119353106164588	0	0	0	0	0	0	0	0	0.00290132590593901	0	0	0.00631691559452528	0	0.0145066295296951	0	0	0	0	0	0.0145066295296951	0.00290132590593901	0.0085389742214657	0	0	0.0203092813415731	-0.00238706212329176	0	0.00341558968858627	0	-0.00119353106164588	0
1028	0	0	0	0	0	0	0	0	0	0	0	0	0	0	0	0	0	0	0	0	0	0	0	0	0	0	0	0	0	0	0	0	0	0	0	0	0	0	0	0	0	0	-0.0194704049844237	0	0	0	-0.058411214953271	0	-0.058411214953271
1029	0	0	0	0	0	0	0	0	0	0	0.127145581691036	0	0	-0.12442969722107	0	0	0	0	0	0	0	0	0	0	-0.0414765657403567	0	0	0	0	0	0	0	0	0	0	0	0	0	0	0	0	0	0	0	0	0	0	0	0
1030	0	0	0	0	0	0	0	0	0	0	0	0	0	0	0	0	0	0	0	0	0	0	0	0	0	0	0	0	0	0	0	0.033178500331785	0	0	-0.111460805399547	0	0	0.0814555877789384	0	0.503832113788999	-0.0180799132164166	0	-0.0361598264328331	0	-0.0180799132164166	0.033178500331785	0	0.49046113616478	0.0301971742307369
1031	0	0	0	0	0	0	0	0	0	-0.00850593288818951	0	-0.0127588993322843	0	0	0	0	0	0	0	0	0	0	0	0	0	0	0	0	0	0	0	0	-0.00425296644409476	0	0	0	0	0	0	0	0	-0.00425296644409476	0	-0.00425296644409476	0	0	0	0	0
1032	0.0232828870779977	0	0	0.0066743502900887	0	0	0	0	0	0	-0.033217073575818	0	0	0	0.109894762974525	0	0	0	0	0.0232828870779977	0	0.0232828870779977	0	0	0	0	0	0	0.0299572373680863	0	0.036631587658175	0	0	0	0	-0.016608536787909	0	0	0.0965460623943481	0	0	0	0	0	0.226463876239139	-0.016608536787909	-0.033217073575818	0	0
1033	0	0	0	0	0	0	0	0	0	0	0	0	0	-0.0578034682080925	-0.115606936416185	0	-0.0578034682080925	0	-0.115606936416185	-0.0578034682080925	0	0	0	0.234879458621175	0	0	0	0.0975609756097561	0	-0.0578034682080925	0	0	0	0	-0.0578034682080925	0	0	0	0	0	0	0	0	0	0	0	0	0	0
1034	0	0	0	0	0	0	0	0	0	0	0	0	0	0	0	0	0.000657746047948499	0	0	0	0	0	0	0.0015255530129672	0	0.0296983798878011	0	0.0037088520738829	0	0	0	0.0126521092346159	0	0	0	0.0030511060259344	0	0	0	0	-0.0098557452623946	-0.000867806965018701	-0.0088605672705193	0	-0.000867806965018701	0	0.0004476851308783	0	0
1035	-0.00374027528426092	0	0	0	0	0.00837170364169108	0	0	0	0	0	0	0	0	0	0	0	0	0	0	0	0	0	0	0	0	0	0	0	0	0	0	0	0	0	0	0	0	0	0	0	0	0	0	0	0	0	0	0
1036	0	0	0	0	0	0	0	0	0	0	0	0	0	0	0	0	0	0	0	0	0	0	0	0	0	0	0	0	0	0	0	0	0	0	0	0	0	0	0	0	0	0	0	0	0	0	0	0	0
1037	0	0	0	0	-0.0120641814452889	0	0	0	0	-0.0120641814452889	0	0	0	0	0	0	0	0	-0.0120641814452889	0	0	0.0220799293442261	0	0	-0.0241283628905779	0	0	0	0	0	0	0	0	0	0	0	0	0	0	0	0	0	0	0	0	0	0	0	0
1038	0	0	0	0	0	0	0	0	0	0	0	0	0	0	0	0	0	0	0	0	0	0	0	0	0	0	0	0	0	0	0	0	0	0	0	0	0	0	0	0	0	0	0	0	0	0	0	0	0
1039	0	0	0	0	0	0	0	0	0	0	0	0	0	0	0	0	0	0	0	0	0	0	0	0	0	0	0	0	0	0	0	0	0	0	0	0	0	0	0	0	0	0	0	0	0	0	0	0	0
1040	0	0	0	0	0	0	0	0	0	0	0	0	0	0	0	0	0	0	0	0	0	0	0	0	0	0	0	0	0	0	0	0	0	0	0	0	0	0	0	0	0	0	0	0	0	0	0	0	0
1041	0	0	-0.00419392719342392	-0.00209696359671196	0	0	0	0	0	0	0	0	0	0	-0.00209696359671196	0	0	0	0	-0.00209696359671196	0	-0.00209696359671196	0	0	0	-0.00209696359671196	0.00539257981018119	0	0	0	0	0	0	0	0	0	0	0	0	0	0	0	-0.00209696359671196	0	-0.00209696359671196	0	0	0	0
1042	0	0	0	0	0	0	0	0	0	0	0	0	0	0	0	0	0	0	0	0	0.313401104540345	0	0	0	0	0	0	0	0	0	0	0	0	0	0	0	0	0	0	0	0	0	0	0	0	0	0	0	0
1043	0	0	0.0105554718248404	0	-0.0162470647132309	-0.00357980275286832	-0.0306122598331453	0	-0.00178990137643416	-0.00899549099061193	-0.0057835611052728	0	0.00353381864442717	0	0	0.0016059649426696	0	0	0.0067457485297663	-0.00715960550573663	0	-0.0861451866110452	0.00353381864442717	0	0	0	0	0	0	-0.00357980275286832	0	0	0	0	0	0.00169793315955186	-0.00178990137643416	0	0	-0.00715960550573663	0	0	0.00527773591242018	0	-0.00178990137643416	-0.0293281836495638	-0.00178990137643416	0	0
1044	0	0	0	0	0	0	0	0	0	0	0	0	0	0	0	0	0	0	0	0	0	0	0	0	0	0	0	0	0	0	0	0	0	0	0	0	0	0	0	0	0	0	0	0	0	0	0	0	0
1045	-0.227852705513472	0	0	0	0.452079566003617	0	0.452079566003617	0	0	-0.063653723742839	0.0904159132007233	0	0.27124773960217	0	0.0904159132007233	0	0	0	0	0	0	0.0904159132007233	0	0	0.180831826401447	0	0.180831826401447	0	0	0	-0.063653723742839	0	0	0	0	0	-0.063653723742839	0	0	0	0	0	0	0	0	0	0	0	0
1046	0	0	0	0	0	0	0	0	0	0	0	0	0	-0.00333222259246918	0	0	0	0	0	0	0	0	0	0	0	0	0	0	0	0	0	0	0	0	0	0	0	0	0	0	0	-0.00999666777740753	0	0	0	0	0	0	0
1047	-0.00375699740767179	0	0	0	0	0	0	-0.00751399481534358	0	0	0	0	0	0	0	0	0	0	0	0	0	0	0	0	0	0	0	0	0	0	0	0	0	0	0	0	0	0	0	0	0	0	0	0	0	0	0	0	0
1048	0.106718853089774	0.0327653997378768	0	0	-0.0365141187925998	0	0	0	0	0.0655307994757536	0	-0.0121713729308666	0	-0.0121713729308666	0	0	-0.0243427458617332	0	0	0	-0.0121713729308666	0	0.0861248262827638	0	0	0	0	0.0327653997378768	0	-0.0121713729308666	0.0327653997378768	0	0.0982961992136304	0.845328170842048	0.0655307994757536	0	0	0	0.0327653997378768	0	0	-0.003748719054723	0	0	0	-0.0365141187925998	-0.0121713729308666	0	0
1049	0	0	0	0	0	0	0	0	0	0	0	0	0	0	0	0	0	0	0	0	0	0	0	0	0.011454753722795	0	0	0	0	0	0	0	0.0343642611683849	0	0.011454753722795	0	0	0.773370809565425	0.0229095074455899	0	0	0	0.0748247935818024	0.011454753722795	0	0	0	0	0
1050	0	0	0	0	0	-0.0542740841248304	0	0	0	0	0	-0.0271370420624152	0	0	0	0	0	0	0	0	0	0	0.0458715596330275	0	0	-0.00840252449180291	0	0	0	0	0	0	0	0.0917431192660551	0	0	0	0	0	0	0	0	0	0	0	0	0	0	0
1051	0	0	0	0	0	0	0	0	0	0	0	0	0	0	0	0	0	0	0	0	0	0	0	0	0	0	0	0	0	0	0	0	0	0	0	0	0	0	0	0	0	0	0	0	0	0	0	0	0
1052	0	0	0	0	0	0	0	0	0	0	0	0	0	0	0	0	0	0	0	0	0	-0.0352733686067019	0	0	0	0	0	0	0	0	0	0	0	0	-0.0352733686067019	0	0	0	0	-0.0352733686067019	0	0	0	0	0	0	0	0	0
1053	0	0	0	-0.011768859597505	0	0	0	0	0	0	0	0	0	-0.011768859597505	0	0	0	0	0	0	0	0	0	0	0	0	0	0	0	0	0	0	0	0	0	0	0	0	0	0	0	0	0	-0.035306578792515	0	0	0	-0.011768859597505	0
1054	0	0	0	0	0	0	0	0	0	0	0	0.0367721402096574	0	0	0	0	0	0	0	0	0	0	0	0	0	0	0	-0.031415047840985	0	0	0	0	0.0367721402096574	0.189035916824197	0	0	0	0	0	0	0	0	0	0	0	0	-0.0787194961952244	0	0
1055	0	0	0	0	0	0	0	0	0	0	0	0	0	0	0	0	0	0	0	0	0	0	0	0	0	0	0	0	0	0	0	0	0	0	0	0	0	0	0	0	0	0	0	0	0	0	0	0	0
1056	0	0	0	0	0	0	0	0	0	0	0	0	0	0	0	0	0	0	0	0	0	0	0	0	0	0	0	0	0	0	0	0	0	0	0	0	0	0	0	0	0	0	0	0	0	0	0	0	0
1057	0	0	0	0	0	0	0	0	0	0	0	0	0	0	0	0	0	0	0	0	0	0	0	0	0	0	0	0	0	0	0	0	0	0	0	0	0	0	0	0	0	0	0	0	0	0	0	0	0
1058	0	0	0	0	0	0	0	0	0	0	0	0	0	0	0	0	0	0	0	0	0.0166666666666667	0	0	0	0	0	0	0	0.0333333333333333	0	0	0	0.0166666666666667	0	0	0	0	0	0	0	0.0166666666666667	0	0	0.0166666666666667	0	0	0	0	0.0023615382781394
1059	0	0	-0.0172176308539945	0	0	0	0	0	0	0	0	0	0	0	0	0	0	0	0	0	0	0	0	0	0	0	0	0	0	0	0	0.0142091447588276	0	0	0	0	0	0	0	0	0	0	-0.0172176308539945	0	0	0	0	0	0
1060	0	0	0	0	-0.00830771786990114	0	0	0	0	0	0	0	0	0	0	0	0	0	0	0	0	0	-0.00830771786990114	0	0	0	0	0	0	0	0	0	0	0	0	0	0	0	0	0	0	0	0	0	0	0	0	0	0
1061	0	0	0	0	0	0	0	0	0	0	-0.00229489386115892	0	0	0	0	0	0	0	0	0	0	0	0	0	0	0	0	0	0	0	0	0	0	0	0.00523231477605693	0	0	0	0	0	-0.00229489386115892	0	0	0	0	0	0	0	0
1062	0	0	0	0	0	0	0	0	0	0	0	0	0	0	0	0	0	0	0	0	0	0	0	0	0	0	0	0	0	0	0	0	0	0	0	0	0	0	0	0	0	0	0	0	0	0	0	0	0
1063	0	0	0	0	0	0	0	0	-0.000613071919466873	0	0	0	0	0	0	0	0	0	0	0	0	0	0	0	0	0	0	0	0	0	0	0	0	0	0	0	0	0.000727098505774184	0	0	0	0	0	0	0	0	0	0	0
1064	0	0	0	0	0	0	0	0	0	0	0	0	0	0	0	0	0	0	0	0	0	-0.00949036727721363	0	-0.00949036727721363	0	0	0	0	0	0	0	0	0	-0.00949036727721363	-0.0189807345544273	0.0357334286224763	0	0	0.0178667143112382	0	0	0	0	0	0	0	0	0	0
1065	0	0	0	0	0	0	0	0	0	0.00265350528047551	0	0	0	0	0	0	0	0	0	0	0	0	0	0	0	0	0	0	0	0	0	0	0	0	0	0	0	0	0	0	0	0	0	0	0	0	0	0	0
1066	0	0	0	0	0	0	0	0	0	0	0	0	0	0	0	0	0	0	0	0	0	0	0	0	0	0	0	0	0	0	0	0	0	0	0	0	0	0	0	0	0	0	0	0	0.0010542853659429	0	0	0	0
1067	0	0	0	0	0	0	0	0	0	0	0	0	0	0	0	0	0	0	0	0	0	0	0	0	0	0	0	0	0	0	0	0	0	0	0	0	0	0	0	0	0	0	0	0	0	0	0	0	0
1068	0	0	0	0.136669440182741	0	-0.00121270465865818	0.0112246043326973	0	0	0.118920643109665	0.0112246043326973	0.0224492086653945	0.258024940929868	0.0917710228519525	0.0145619042240436	0.00561230216634864	0	0.0279111037894291	0	0	0	0.0873808736644072	-0.00121270465865818	0	-0.0295655812548845	-0.00455000455000455	-0.0207758345596487	0	0	-0.00682500682500682	0	0	-0.00682500682500682	0	0	-0.0253258391096533	0	0	0	0	-0.00682500682500682	-0.00227500227500228	0	0	0	0	0	0	0
1069	0	0	0	0	0	0	0	0	0	0	0	0	0	0	0	0	0	0	0	0	0	0	0	0	0	0	0	0	0	0	0	0	0	0	0	0	0	0	0	0	0	0	0	0	0	0	0	0	0
1070	0	0	0	0	0	0	0	0	0	0	0	0	0	0	0	0	0	0	0	0	0	0	0	0	0	0	0	0	0	0	0	0	0	0	0	0	0	0	0	0	0	0	0	0	0	0	0	0.00351877265209895	0
1071	0	0	0	0	0.0135943447525829	-0.00791389680278569	0	0	-0.0158277936055714	0	0	0	0	-0.00791389680278569	0.0135943447525829	0	0	0	0	-0.0237416904083571	0	0	0.0135943447525829	0	-0.0158277936055714	0	0	0	0	0	-0.00791389680278569	0	0	0	0	0	0	-0.0237416904083571	-0.0158277936055714	0	0	0	0	0	-0.0158277936055714	0	0	0	0
1072	0	0	0	0	0	0	0	0	0	0	0	0	0	0	0	0	0	0	0	0	0	0	0	0	0	0	0	0	0	0	0	0	0	0	0	0	0	0	0	0	0	0	0	0	0	0	0	0	0
1073	0	0	0	0	0	0	0	0	0	0	0	0	0	0	0	0	0	0	0	0	0	0	0	0	0	0	0	0	0	0	0	0	0	-0.00485271994953171	0	0	0	0	0	0	0.0103637682661416	0	0.0207275365322831	0	0	-0.00970543989906343	0	0.0103637682661416	0
1074	0	0	0	0	0	0	0	0	0	0	0	0	0	0	0	0	0	0	0	0.020831163420477	0	0	0	0.020831163420477	0	0	-0.0139169160114119	0	0	0	0	0	0.0312467451307155	0	0	0	0	0	0.0104155817102385	0.020831163420477	0	0	0	0	0	0	0	0.0104155817102385	0
1075	0.126263754616978	0	0.11275464497901	0.0427167876975651	0	0	0.604300553808953	0	0.0427167876975651	0	0	0	-0.705571710881815	-0.0483766131247181	0.018190877513236	-0.0116225011622501	-0.0191689350651207	0	0.0427167876975651	0.0681512488057272	0.0427167876975651	-0.0232450023245002	-0.228373955985623	0	0	0	0	0.0640751815463477	0	0	0	0	-0.0116225011622501	0	0	0	0	0	0	0	0	0	0	0	0	0	0	-0.0116225011622501	0
1076	-0.000327204787660453	0	0	0	0	0	0	0	0	0	0	0	0	0	0	0	0	0	0	0	0	0	0	0	0	0	0	0	0	0	0	0	0	0	0	0	0	0	0	0	0	0	0	0	0	0	0	0	0
1077	0	0	0	0	0	0	0	0	0	0	0	0	0	0	0.00862589493659967	0	0	0	0	0	0	0	0	0	0	-0.00376095377787807	0.0172517898731993	0	0	0	0	0	0.0431294746829984	-0.00752190755575614	0	0	0	0	-0.00376095377787807	0	0	0	0	0.0183557772540429	0	0	0	0	-0.00376095377787807
1078	0	-0.0154886674583097	0.0493096646942801	0	0	-0.00516288915276989	0	0	-0.00516288915276989	0.029585798816568	0.00986193293885602	0.029585798816568	0	0	0.0089342422054884	0	0	0	0	0	0	0	0	0	0	0.136675525043933	0	0	0	0.185057499004845	0	0	0.0535448631136824	0	0	-0.00516288915276989	0.0366646595553215	0.00986193293885602	0	0.013230030744139	0	-0.00516288915276989	0	0.0244229096637981	0.00986193293885602	0	0	0.0042351984194023	-0.000463845366683781
1079	0	-0.0367782272894446	0	0	0.0336813742000674	0	-0.0183891136447223	0	0.0336813742000674	0	-0.0735564545788893	-0.0183891136447223	0.0336813742000674	-0.0183891136447223	0	-0.147112909157779	0	0.0152922605553451	0	0	0	-0.0183891136447223	0	0	0	0	-0.0183891136447223	0	0	-0.0183891136447223	0.0336813742000674	0	0.0336813742000674	-0.0367782272894446	-0.183891136447223	-0.0183891136447223	0.11323953006617	0	0	-0.0367782272894446	0	-0.0183891136447223	0.0336813742000674	0	-0.055167340934167	0	0	0	0
1080	0	0	0	0	0	0	0	0	0	0	0	0	0	0	0	0	0	0	0	0	0	0	0	0	0	0	0	0	0	0	0	0	0	0	0	0	0	0	0	0	0	0	0	0	0	0	0	0	0
1081	0	0	0	0	0	0	0	0	0	0	0	0	0	0	0	0	0	0	0	0	0	0	0	0	0	0	0	0	0	0	0	0	0	0	0	0	0	0	0	0	0	0	0	0	0.0337040781934614	0	0	0	0
1082	0	0	0	0	0	0	0	0	0	0	0	0	0	0	0	0	0	0	0	0	0	0	0	0	0	0	0	0	0	0	0	0	0	0	0	0	0	0	0	0	0	0	0	0	0	0	0	0	0
1083	0	0	-0.000495670319756923	0	0	0	0	0	0	0	0.00326530612244898	0	0	0	0	0	0	0	0	-0.000495670319756923	0	0.00163265306122449	-0.000495670319756923	0	0	-0.000495670319756923	0	0.00163265306122449	0	0	0	0	-0.000495670319756923	0	0.00227396548293513	0	0	0	0.00489795918367347	0.00163265306122449	-0.000495670319756923	0	0	0	0	0.00113698274146757	0	0	0
1084	0	0	0	0	0	0	0	0	0	0	0	0	0	0	0	0	0	0	0	0	0	0	0	0	0	0	0	0	0	0	0	0	0	0	0	0	0	0	0	0	0	0	0	0	0	0	0	0	0
1085	0	0	0	0	0	0	0.0780118132174301	0	0	0	0	0	-0.0125219133483596	0	0	-0.0076383252771922	0	0	0	0	0	-0.0138992819513721	0	0	-0.00626095667417982	0	0	0	0	0	-0.0125219133483596	-0.00626095667417982	0.0111445447453472	0	0	0	0	0.0111445447453472	0	-0.0313047833708991	0	0	0	0	0	0	0	0	0
1086	0	0	0	0	0	0	0	0	0	0	0	0	0	0	0	0	0	0	0	0	0	0	0	0	0	0	0	0	0	0	0	0	0	0	0	0	0	0	0	0	0	0	0	0	0	0	0	0	0
1087	-0.00302288322602098	0	0	0	0	0	0	0	0	0	0	0	0	0	0	0	0	0	0	0	0	0	0	0	0	0	0	0	0	0	0	0	0	0	0	0	0	0	0	0	0	0	-0.00302288322602098	0	0	0	0	0	0
1088	0	0	0	0	0	0	0	0	0	0	0	0	0	0	0	0	0	0	0	0	0	0	0	0	0	0	0	0	0	0	0	0	0	0	0	0	0	0	0	0	0	0	0	0	0	0	0	0	0
1089	0	0	0	0	0	0	0	0	0	0	0	0	0	0	0	0	0	0	0	0	0	0	0	0	0	0	0	0	0	0	0	0	0	0	0	0	0	0	0	0	0	0	0	0	0	0	0	0	0
1090	0	0	0	0	0	0	0	0	0	0	0	0	0	0	0	0	0	0	0	0	0	0	0	0	0	0	0	0	0	0	0	0	0	0	0	0	0	0	0	0	0	0	0	0	0	0	0	0	0
1091	0	0	0	0	0	0	0	0	0	0	0	0	0	0	0	0	0	0	0	0	0	0	0	0	0	0	0	0	0	0	0	0	0	-0.00337091908108746	0	0.0287111609252355	-0.00168545954054373	-0.0021545161087008	0	0	0	0	0	0	0	0	0	0	0
1092	0	0	0	-0.00400256163944925	0	0	0	-0.00400256163944925	0	0	-0.0080051232788985	0	0	0	0	0	0	0	0	0	-0.00400256163944925	0	0.0057727769691037	0	0	0	0	0	0	0	0	-0.0080051232788985	0	0	0	0	0	0	0	0	0	0	0	0	0	0	0	0	0.0137779002480022
1093	0	0	0	0	0	0	0	0	-0.00805152979066022	0	0	0	0	0	0	0	0	0	0	0	0	0	0	0	0	0	0	0	0	0	0	0	0	0	0	0	0	0	0	0	0	0	0	0	0	0	0	0	0
1094	0	0	0	0	0	0	0	0	0	0	0	0	0	0	0	0	0	0	0	0	0	0	0	0	0	0	0	0.0487804878048781	0	0	0	0	0	0	0	0	0	0	0	0	0	0	0	0	0	0	0	0	0
1095	0	0	0	0	0	0	0	0	0	0	0	0	0	0	0	0	0	0	0	0	0	0	0	0	0	0	0	0	0	0	0	0	0	0	0	0	0	0	0.00637679317578124	0	0	0	0	0	0	0	0.00637679317578124	0	0
1096	0	0	0	0	0	0	0	-0.00329511005667589	0	0	0	0	0.00963146698572331	0	0	0.0058286305604386	0	0	0	0	-0.00329511005667589	0	-0.00329511005667589	-0.00988533017002768	0	0	0.0129265770423992	-0.00659022011335179	0	0	0	0	-0.00988533017002768	0.0258531540847983	0	0	0	0	0	0.0415671148152646	0.0129265770423992	-0.00659022011335179	0.0354846210705216	-0.17565628574104	-0.00329511005667589	-0.00988533017002768	-0.00329511005667589	0	0
1097	-0.0592417061611374	0	0	0	0	0	0.23094688221709	0	0	0	0	0	0	0	0	0	0	0	0	0	0	0	0	0	0	0	0	0	0	0	0	0	0	0	0	0	0	0	0	0	0	0	0	0	0	0.115473441108545	0	0	0
1098	0	0	0	0	0	0	0	0	0	0	-0.00157304431265829	0	0	0	0	0	0	0	0	0	0	0	0	0	0	0	0	0	0	0	0	0	0	0	0	0	0	0	0	0	0	0	0	0	0	0	0	0	0
1099	-0.00640204865556978	-0.0128040973111396	0	0.0131492439184747	0	0	0	0	0	0	0	0	0	0	0	0	0	-0.00640204865556978	0	0	0	0	0	0	0	0	-0.0128040973111396	0	0	0	0	-0.00640204865556978	0	0	0	0	0	0	0	0	0	0	0	0	0	0	0.0131492439184747	0	0
1100	0	0	0	0	0	0	0	0	0	0	0	0	0	0	0	0	0	0	0	0.135961930659415	0	0	0	0	-0.069856793573175	0	0	0	0	-0.038680053273522	0	0	0	-0.069856793573175	0	0	0	0	-0.0349283967865875	-0.13971358714635	0	0	0	0	0	0	0	0	0
1101	0	0	0	0	0	0	0	0	0	0	0	0	0	0	0	0	0	0	0	0	0	-0.008911067545892	0	0	0	0	0	0	0	0	0	0	0	0	0	0	0	0	0	0	0	0	0	0	0	0	0	0	0
1102	0	0	0	0	0	0	0	0	0	0	0	0	0	0	0	0	0	0	0	0	0	0	0	0	0	0	0	0	0	0	0	0	0	0	0	0	0	0	0	0	0	0	0	0	0	0	0	0	0
1103	0	0	0	0	0	0	0	0	0	0	0	0	0	0	0	0	0	0	0	0	0	0	0	0	0	0	0	0	0	0	0	0	0	0	0	0	0	0	0	0	0	0	0	0	0	0	0	0	0
1104	0	0	0	0	0	0	0	0	0	0	0	0	0	0	0	0	0	0	-0.24896265560166	0	-0.275707237840084	0	0	0.112485939257593	0	0	0	-0.0829875518672199	0	0	0	0	0	0	0	-1.37853618920042	0	0	0	0	-0.24896265560166	0	0	0.0562429696287964	0	0	0	0	0
1105	0	0	0	0	0	0	0	0	0	0	0	0	0	0	0	0	0	0	0	0	0	0	0	0	0	0	0	0	0	-0.0033526670466356	0	0	0	0	-0.0033526670466356	0	0	0	0	0	-0.0067053340932712	0	0	0.00616218880946512	0	0	0	0	0
1106	0	0	0	0	0	0	0	0	0	0	0	0	0	0	0	0	0	-0.00236694793898008	0	0	0	0	0	0	0	0	0	0	0	0	0	0	0	0	0	0	0	0	0	0	0	0	0	0	0	0	0	0	0
1107	0	0	0	0	0	0	0	0	0	0	0	0	0	0	0	0	0	0	0	0	0	0	0	0	0	0	0	0	0	0	0	0	0	0	0	0	0	0	0	0	0	0	0	0	0	0	0	0	0.040428542551041
1108	0	0	0	0	0	0	0	0	0	0	0	0	0	0	0	0	0	0	0	0	0	0	0	0	0	0	0	0	0	0	0	0	0	0	0	0	0	0	0	0	0	0	0	0	0	0	0	0	0
1109	0	0	0	0	0	0.0254517688979384	0	0	0	0	0	0	0	0	0.0254517688979384	0	0	0	0	0	0	-0.0056282621820927	0	0	0	0	0	0	0	0	0	0	0	0	0	0	0	0	0	0	0	0	0	0	0	0	0	0	0
1110	0.0332446808510638	0	0	0	0	0	0	0	0	0	0	0	0	0	0	0	0	-0.00537880214076325	0	0	-0.00268940107038163	0	0	0	0.0158381403993246	0	0	0	0	0	0.00664893617021277	0	0	0.00664893617021277	0	0	0	0	0	0	0	0	0	0	0	0	0	0	0.0132978723404255
1111	0	0	0	0	0	0	0	0	0	0	0	0	0	0	0	0	0	0	0	0	0	0	0	0	0	0	0	0	0	0	0	0	0	0	0	0	0	0	0	0	0	0	0	0	0	0	0	0	0
1112	0	0	0	0	0	0	0	0	0	0	0	0	0	0	0	0	0	0	0	-0.00587924040214004	0	0	0	0	0	0	0	0	0	0.00989119683481701	0	0	0	0	0	0	0	0	0	0.040637123570875	0.00989119683481701	0	0	0	0.00695157663374699	0	-0.00293962020107002	0	0
1113	0	0	0	0	0	0	0	0	0	0	0	0	0	0	-0.0156298843388559	0	0	-0.0312597686777118	0	0	0	0	0	0	0	0	0	0	0	0	0.0293255131964809	0	0.0293255131964809	0	0.0293255131964809	0	0	0	0	0	0	0	0	0	0	0	0	0	0
1114	0	0	0	0	0	0	0	0	0	0	0	0	0	0	-0.00456808734182998	0	0	0	0	0	0	0	0	0	0	0	0	0	0	0	0	0	0	0	0	0	-0.00913617468365995	0	0	0	-0.00456808734182998	0	0	0	0	0	0	0	0
1115	0	0	0	0	0	0	0	0	0	0	0	0	0	0	0	-0.0346981263011797	0	0	0	0	0	0	0	0	0	0	0	0	0	0	0	-0.00867453157529493	0	-0.00867453157529493	0	0	0	-0.0173490631505899	-0.0810365673380299	-0.0260235947258848	-0.0346981263011797	-0.0173490631505899	-0.0346981263011797	-0.00867453157529493	-0.0173490631505899	0	0	-0.00867453157529493	0
1116	0	0	0	0	0	0	0	0	0	0	0	0	0	0	0	0	0	0	0	0	0	0	0	0	0	0	0	0	0	0	0	0	0	0	0	0	0	0	0	0	0	0	0	0	0	0	0	0	0
1117	0	0	0	0	0	0	0	0	0	0	0	0	0	0	0	0	0	0	0	0	0	0	0	0	0	0	0	0	0	0	0	0	0	0	0	0	0	0	0.210304942166141	0.525762355415352	0.00936703047004321	0	0	0	0	0	0.10515247108307	0.525762355415352	0.00936703047004321
1118	0	0	0	0	0.00427892703637054	0.0160552299911696	-0.00749737591842855	0.0240828449867544	-0.00374868795921427	-0.00749737591842855	0	0	0.00802761499558481	0	-0.00749737591842855	-0.00374868795921427	-0.00749737591842855	0	0	0	0	0	0.0048091661135268	0	-0.0149947518368571	0	0	-0.00749737591842855	0	-0.00749737591842855	0	0.0165854690683259	0	-0.0149947518368571	0	-0.00374868795921427	0	0.0283617720231249	0.00802761499558481	-0.00374868795921427	-0.0016277316505893	-0.00374868795921427	-0.0262408157144999	0	0	0	0.00427892703637054	-0.0112460638776428	0
1119	0	0	0	0	0	0	0	0	0	0	0	0	0	0	0	0	-0.00924385283786282	0	0	-0.00924385283786282	0	0	0	0	0	0	0	0	0	0	0	-0.0184877056757256	0.0571537435702038	0	0	0	-0.00924385283786282	0	0	0	-0.00924385283786282	-0.0184877056757256	-0.00924385283786282	0	0	0	0	-0.0184877056757256	0
1120	0	0	0	0	0	0	0	0	0	0	0	0	0	0	0	0	0	0	0	0	0	0	0	0	0	0	0	0	0	0	0	0	0	0	0	0	0	0	0	0	0	0	0	0	0	0	0	0	0
1121	0	-0.00110348480501424	0	0	0	0	0	0	0	0	0	0	0.0151668351870576	0	0	-0.00110348480501424	0	0	0	0	0	0	0	0	0	0	0	0	0	0	0	0	0	0	0	0	0	0	0	0	0	0	0	0	0	0	0	0	0.00252780586450961
1122	0	0	0	0	0	0	0	0	0	0	0	0	0	0	0	0	0	0	0	0	0	0	0	0	0	0	0	0	0	0	0	0	0	0	0	0	0	0	0	0	0	0	0	0	0	0	0	0	0
1123	0	0	0	0	0	0	0	0	-0.00349027957139367	0	0	0	0	0	0	0	0	0	0	0	0	0	0	0	0	0	0	0	0	0	0.00502253221033784	0	0	0	0	0	0	0	0	0	0	0	0	0	0	0	0	0	0
1124	0	0	0	0	0	0	0	0	0	0	0	0	0	0	0	0	0	0	0	0	0	0	0	0	0	0	0	0	0	0	0	0	0	0	0	0	0	0	0	0	0	0	0	0	0	0	0	0	0
1125	-0.0156445556946183	0	-0.0156445556946183	-0.0469336670838548	0	0	0	0	-0.0156445556946183	0	0	0	0	0	0	0	0	0.0267642653401569	0	0	0	-0.0469336670838548	0	0	-0.0625782227784731	0.0424088210347752	0	0.0267642653401569	0	0	0	-0.0469336670838548	0	0	-0.0156445556946183	-0.0312891113892365	-0.0156445556946183	0	-0.0312891113892365	0	-0.0469336670838548	-0.0514585131329344	-0.0782227784730914	0	0	0.196399549479258	0	0.0267642653401569	-0.0625782227784731
1126	0	0	0	0.0228102189781022	0	0	0	0	-0.01404099971918	0.0228102189781022	0	0	0	-0.0193127801794378	0	0	0	0	0	-0.01404099971918	0	0	0	0	-0.01404099971918	0	0	0	0	0	0	0	0.18034869849157	0	0.456153135037521	0	0.150851069063271	-0.02808199943836	0	0.196471507019475	0.114051094890511	0	0.036697485123715	0.0228102189781022	0	-0.22465599550688	0	0	0
1127	0	0	0	0	0	0	0	0	0	0	0	0	-0.0269396551724138	0	0	0	0	0	0	0	0	0	0	0	0	0	0	0	0	0	0	0	-0.0269396551724138	0	-0.0538793103448276	0	0	0	0	0	0	0	-0.0269396551724138	0	0	0	0	0	0
1128	0.0412146484088758	0	0.0003315740016804	0.0006631480033608	4.01781480796229	0.0003315740016804	2.54270838928645	0.000994722005040999	0.248945760461657	0	0	0.209057408059503	0.409493892075315	0	0	0	0.613909264111292	0	0	-0.040551500405515	0	0	0	0	0	0.0003315740016804	0	0	0	0	0.0817661488143908	0	-0.040551500405515	1.72073643912069	0	0.252924648481825	0	-0.040551500405515	0	-1.19366640604951	-0.364963503649635	-27.0366767266219	-0.527169505271695	0.0412146484088758	0	-0.040551500405515	0.0817661488143908	0.0408830744071954	0
1129	0	0	0	0	0	0	0	0	0	0	0	0	-0.00516288915276989	0	0	0	0	0	0	0	0	0	0	0	0	0	0	0	0	0	0	0	0.0101229561544756	0	0	0	0	0	0	0	0	0	0.0458575359217365	0.0152858453072455	0	0	0	0	0
1130	0	0	0	-0.0582920431361119	0	0	-0.0582920431361119	0	0	-0.0052350231916319	0	-0.0874380647041679	0	0	-0.116584086272224	0	0	0	0	0	0	0	0	-0.378898280384728	0	0	0	0	0	0	0.041101520756268	0	0	0	0	0	0	0	0	0	0	0	0	0	0	0	0	0	-0.029146021568056
1131	0	0	0	0	0	0	0	0	0	0	0	0.0111582236108012	0	0	0	0	0	0	0	0	0	0	0	0	0	0	0	0	0	0	0	0	0	0	-0.0117439812096301	0	0	0	0	0	0	0	0	0.0334746708324035	0	0	0	0.0111582236108012	0
1132	0	0	0	0	0	0	0	0	0	0	0	0	0	0	0	0	0	0	0	0	0	0	0	0	0	0	0	0	0	0	0	0	0	0	0	0	0	0	0	0	0	0	0	0	0	0	0	0	0
1133	0	0	0	0	0	0	0	0	0	0	0	0	0	0	0	0	0	0	0	0	0	0	0	0	0	0	0	0	0	0	0	0	0	0	0	0	0	0	0	0	0	0	0	0	0	0	0	0	0
1134	0	0	0	0	0	0	0	0	0	0	0	0	0	0	0	0	0	0	0	0	0	0	0	0	0	0	0	0	0	0	0	0	0	0	0	0	0	0	0	0	0	0	0	0	0	0	0	0	0
1135	0	0	0	0	0.0157998683344305	0.00263331138907176	-0.00165880118438405	0	0	0	0.0115077557609747	0.00263331138907176	0	0	0.00789993416721527	0	0.0044372221859515	0	0	0	0	0	0.00526662277814352	0.00180391079687974	-0.00165880118438405	0	0.00263331138907176	0	0	0	0	-0.00165880118438405	0	0	0	0.00263331138907176	0	0.00526662277814352	0	0	0	0	0	0	0	0	-0.00248820177657607	0	0
1136	0	0	0	0	0	0	0	0	0	0	0	0	0	0	0	0	0	0	0	0	0	0	0	0	0	0	0	0	0	0	0	0	0	0	0	0	0	0	0	0	0	0	0	0	0	0	0	0	-0.0705218617771509
1137	0	0	0	0	0	0	0	0	0	0	0	0	0	0	0	0	0	0	0	0	0	0	0	0	0	0	0	0	0	0	0	0	0	0	0	0	0	0	0	0	0.00966557123526	0	0	0	0	0	0.01933114247052	0	0
1138	0	0	0	0	0	0	0	0	0	0	0	0	0.0044260898017101	0	0	0	0	0	0	-0.028587764436821	0	0	0	0	0.0136481506755835	-0.0171526586620926	0	0	0	0	-0.00571755288736421	0	-0.00571755288736421	0	0	-0.00571755288736421	0	0	0	0	0	0	0	-0.00571755288736421	0	0	0	0	0
1139	0	0	0	0	0	-0.0625	0	0	0	0	0	0	0	0	0	0	0	0	0	0	0	0	0	0	0	0.191387559808612	0	0	0	0	0	0	0	0	0	0	0	0	-0.0625	0	0	0	0	0	0	0	0	0	-0.0625
1140	0	-0.010612331529237	0	0	-0.0212246630584739	0	0	0	0	0	0	-0.010612331529237	0	0	0	0	0	0	0	-0.0424493261169479	0	0	-0.0318369945877109	0	0	0	0	0	0	0	0	0	0	0	0	0	0	0	0	0	0	0	0	0	0	0	0	0	0
1141	0	0	0	0	0	0	0	0	0	0	0	0	0	0	0	0	-0.0386922035209905	0	0	0	0	0	0	0	0	0	0	0	0	0	0	0	0	0	0	0	0	0	0	0	0	0	0	-0.0386922035209905	0	0	0	0	0
1142	0	0	0	0	0	0	0	0	0	0	0	0	0	0	0	0	0	0	0	0	0	0	0	0	0	0	0	0	0	0	0	0	0	0	0	0	0	0	0	0	0	0	0	0	0	0	0	0	0
1143	0	0	0	0	0	0	0	0	0	0	0	0	0	0	0	0	0	0	0	-0.00539316147125445	0	0	0	0	0	0	0	0	0	0	0	0	0	0	0	0	0	0	0	0	0	0	0	0	0	0	0	0	0
1144	0	0	0	0	0	0	0	0	0	0	0	-0.0274047684297068	0	0	0	0	0	0	0	0	0	0	0	0	0	0	0	0	0	0	0	0	0	0.091869545245751	0	0	-0.0274047684297068	0	0	0	0	0	0	0	0	0	0	0	0
1145	0	0	0	0	0	0	0	0	0	0	0	0	0	-0.0121921482565228	0	0	0	0	0	0	0	0	0	0	0	0	0	0	0	-0.0121921482565228	0	0	0	0	0	0	0	-0.0121921482565228	0	-0.0365764447695684	0	0	-0.0121921482565228	0	0	0	0	0	0
1146	0	0	0	0	0	0	0	0	0	0	0	0	0	0	0	0	0	0	0	0	0	0	0	0	0	0	0	0	0	0	0	0	0	0	0	0	0	0	0	0	0	0	0	0	0	0	0	0	0
1147	0	-0.00490340296165539	0	0	-0.00490340296165539	0	0	0	0	-0.00490340296165539	0	0	0	0	0	0	0	0	0	0	0	0	0	0	0	0	0	0	0	0	0	0	0	-0.00490340296165539	0	0	-0.00490340296165539	0	0.0234907211651398	0	0	0	0	0	0	0	0	0	0
1148	0	0	0	0	0	0	0	0	0	0	0	0	0	0	0	0	0	0	0	0	0	0	0	0	-0.00296340198547933	0	0	0	0	0	0	0	0	0	0	0	0	-0.00296340198547933	0	0	0.0283884520118751	0	0	-0.00889020595643799	0	0	0.00621310966138552	0	0
1149	0	0	0	0	0	0	0	0	0	0	0	0	0	0	0	0	0	0	0	0	0	0	0	0	0	0	0	0	0	0	0	0.0131682907558599	0	0	0	0	0	0	0	0	0	0	0	0	0	0	0	0	0
1150	0	0	0	0	0	0	0	0	-0.0162311313098523	0	0	0	0	0	0	0	0	0	0	0	0	0	0	0	0	-0.0486933939295569	0	0	-0.0324622626197046	0	-0.0324622626197046	0	-0.0324622626197046	0	0	-0.0811556565492615	-0.0162311313098523	0	0	0	-0.0162311313098523	0	-0.0324622626197046	-0.0162311313098523	0	0	0	0	0
1151	-0.031001343391547	0	0	0	0	0.008910849783468	0	-0.0103337811305157	0.039912193175015	0	0	0.0199560965875075	0.199560965875075	0.039912193175015	0.0199560965875075	0.0598682897625225	-0.0206675622610313	0.305406435901985	0	0	0	0	0	0.179604869287567	0	0.0199560965875075	0	0.0199560965875075	0.23947315905009	0.0096223154569918	0	0	-0.0103337811305157	0	0	0.295072654771469	-0.0103337811305157	0.446522043361585	0.0894467018070217	0	0	0	0.318586079726596	0	0.198138034528027	0	0	0	0
1152	0	0	0	-0.0113895216400911	0	0	0	-0.0113895216400911	0	0	0	0.0274310794129749	0	0	0	0	-0.0113895216400911	0	0	0	0	0	0	0	0	0	0	0	0	-0.0113895216400911	0	0	0	0	0	0	-0.0113895216400911	0	0	0	0	-0.0113895216400911	0	0	0	0	0	0	0
1153	0	0	0	0	0	0	0	0	0	0	0	0	0	0	0	0	0	0	0	0	0	0	0	0	0	0	0	0	0	0	0	0	0	0	0	0	0	0	0	0	0	0	0	0	0	0	0	0	0
1154	0	0	0	0	0	0.0310366232153942	-0.0171614896172988	0	0	-0.0171614896172988	0	0	0	0	0	0	0	0	0	-0.0171614896172988	0	0	0.0310366232153942	-0.0171614896172988	0	0	0	0	0	0	0	0	0	0	0	0	0	0	0	0	0	0	0	0	0	0	0	0	0
1155	0	0	-0.00615991129727732	0	0	0	0	0	0	0	0	0	0	0	0	0	0	0	0	0	0	0	0	0	0	0	0	0	-0.00615991129727732	0.010134426872157	0	0	0	0	0	0	0	0	0	0	0	0	0	0	0	0	0	0	0
1156	0	0	0	0	0	0	0	0	0	0	0	0	0	0	0	0	0	0.0637755102040816	0	0	0	0	0	0	0	0	0	0	0	0.0318877551020408	0	0	0	0	0	0	0	0	0	0	0	0	-0.0211685012701101	0	0	0	0	0	0
1157	0	0	0	0	0	0	0	0	0	0	0	0	0	0	0	0	0	0	0	0	0	0	0	0	0	-0.0132257637878587	0	0	0	0	0	0	0	0	0	0	0	0	0	0	0	0	0	0	0	0	0	0	0
1158	0	0	0	0	0	0	0	-0.03725782414307	0	0	0	0	0	0	0	0	0	0	0	0	0	0	0	0	0	0	0	0	0	0	-0.0745156482861401	0	0	0	0	-0.03725782414307	0	0	0	0	0	0	0	0	0	0	0	0	0
1159	0	0	0	-0.0176242509693338	0	0	0	0	0	0	0	0	0	0	0	0.0396353547364249	0	-0.0352485019386676	0	0	-0.0352485019386676	-0.0528727529080014	0	0	0	0	0	0	0	0	0	0	0	0	0	0	0	0	0	0	0	0	0	0	0	0	0	0	0
1160	0	0	0	0	0	0	0	0	0	0	-0.033335205419145	0	0	0	0	0	0	0	0	0	0	0	0	0	0	0.0705353621912341	0	0	0	0	0	0	0	0	0	0	0	0	0	0	0	0	0	0	0	0	0	0	0
1161	0	0	0	0	0	0	0	0	0	0	0	0	0	0	0	0	0	0	0	0	0	0	0	0	0	0	0	0	-0.270758122743682	-0.0902527075812274	0	0	0	0	0	0	0	0	0	0	0	0	-0.0902527075812274	0	0	0	0	0	-0.0902527075812274
1162	0	0	0	0	0	0	0	0	0	0	0	0	0	0	0	0	0	0	0	0	0	0	0	0	0	0	0	0	0	0	0	0	0	0	0	0	0	0	0	0	0	0	0	0	0	0	0.0199572510957526	0	0
1163	0	0	0	0	0	0	0	0	0	0	0	0	0	0	0	0	0	0	0	0	0	0	0	0	0	0	0	0	0	0	0	0	0	0	0	0	0	0	0	0	0	0	0	0	0	0	0	0	0
1164	-0.00977803852547179	-0.015056995360361	-0.0090341972162164	-0.117336462305661	-0.0880023467292461	-0.0977803852547179	-0.0586682311528307	-0.0812357072758468	-0.113581221924333	-0.174517010839982	0.236904448539089	-0.176004693458492	-0.0293341155764154	0	-0.0421235531739593	-0.0293341155764154	-0.0782243082037743	-0.0030113990720722	-0.0060227981441442	0	0	0	0	0	0	0	0.0263227165043432	0	0	0	0	0	0	0	0	0	0	0	0	0	0	0	0.0526454330086865	0	0	0	0	0	0
1165	0	0	0	0	0	0	0	0	0	0	0	0	0	0.0222321031569586	0	0	0	0	0	0	0	0	0	0	0	0	0	0	0	0	0	0	0	0	0	0	-0.014421690222094	0	0	0	0	0	0	0	0	0	0	0	0
1166	0	0	0	0	0	0	0	0	0	0	0	0	0	0	0	0	0	0	0	0	0	0	0	0	0	0	0	0	0	0	0	0	0	0	0	0	0	0	0	0	0	0	0	0	0	0	0	0	0
1167	0.160170848905499	0	0	0	0	0	0	0	0	0	0	0	0	0	0	0	0	0	0	0	0	0	0	0	0	0	0	0	0	0	0	0	0	0	0	0	0	0	0	0	0	0	0	0	0	0	0	0	0
1168	0	0	0	0	0	0	0	0	0	0	0	0	0	0	0	0	0	0	0	0	0	0	0	0	0	0	0	0	0	0	0	0	0	0	0	0	0	0	0	0	0	0	0	0	0	0	0	0	0
1169	0	0	0	0	0	0	0	0	0	0	-0.0628535512256442	0	-0.125707102451288	0	0	0	0	0	0	0	0	0	0	0	0	0	0	0	0	0	0	0	0	0	0	0	0	0	0	0	0	0	0	0	0	-0.251414204902577	0	0	0
1170	0	0	0	0	0	0	0	0	0	0	0	0	0	0	0	0	0	0	-0.0203873598369011	0	0	0	0	0	0	0	0	0	-0.0407747196738022	0	0	0	0	0	0	0	0	0	0	0	0	0	0	0	0	0	0	0	0
1171	0	0	0	0	0	0	0	0	0	0	0	0	0	0	0	0	0	0	0	0	0	0	0	0	0	0	0	0	0	0	0	0	0	0	0	0	0	0	0	0	0	0	0	0	0	0	0	0	0
1172	0	0	-0.0490196078431373	0	0.0675675675675676	-0.343137254901961	-0.177530471648118	0	-0.0490196078431373	0	-0.0980392156862745	0	-0.0980392156862745	0	0	0	-0.0490196078431373	0	-0.0490196078431373	0	0	0	0.0185479597244303	0	0	0	0	0	0	0	0	0	0	0	0	0	0	0	-0.196078431372549	0	0	0	0	0	0	0	-0.0490196078431373	0	-0.0490196078431373
1173	0	0	0	0	0	0	0	0	0	0	0	0	0	0	0	0	0	0	0	0	0	0	0	0	0	0	0	0	0	0	0	0	0	0	0	0	0	0	0	0.00736322803917237	0	0	0	0	0	0	0	0	0
1174	0	0	0	0	0	0	0	0	0	0	0	0	0	0	0	0	0	0	0	0	0	0	0	0	0	0	0	0	0	0	0	0	0	0	0	0	0	0	0	0	0	0	0	0	0	0	0	0	0
1175	0	0	0	0	0	-0.0222172850477672	0	0	0	0	0	0	0	0	0	0	0	0	0	0	0	0	0	0	0	0	0	0	0	0	0	0	0	0	0	0	0	0	0	0	0	0	0	0	0	0	0	0	0
1176	0	0	0	0	0	0	0	0	0	0	0	0	0	0	0	0	0	0	0	0	0	0	0	0	0	0	0	0	0	0	0	0	0	0	0	0	0	0.0835421888053467	0	0	0	0	0	0	0	0	0	0	0
1177	0	0	0	0	0	0	0	0	0	0	0	0.0609013398294763	0	-0.0154726907009129	0	0	0	0	0	0	0	0	0	0	0	0	0	0	0	0	0	0	0	0	0	0	0	0	0	0	0	0	0	0	0	0	0	0	0
1178	0	0	0	0	0	0	0	0	0	0	0	0	-0.00700304632515144	0	0	0	0	0	0	0	-0.00350152316257572	0	0	0	0	0	0	0	0	0	0	0	0	0	0	0	0	0	0	0	0	0	0	0	0	0	0	0	-0.00350152316257572
1179	0	0	0	0	0	0	0	0	0	0	0	0	0	0	0	0	0	0	0	0	0	0	0	0	0	0	0	0	0	0	0	0	0	0	0	0	0	0	0	0	0	0	0	0	0	0	0	0	0
1180	0	0	0	0	0	0	0	0	0	0	0	0	0	0	0	0	0	0	0	0	0	0	0	0	0	0	0	0	0	0	0	0	0	0	0	0	0	0	0	0	0	0	0	0	0	0	0	0	0
1181	0	0	0	0	0	0	0	0	0	0	0	0	0	0	0	0	0	0	0	0	0	0	0	0	0	0	0	0	0	0	0	0	0	0	0	0	0	0	0	0	0	0	0	0	0	0	0	0	0
1182	0	0	0	0	0	0	0	0	0	0	0	0	0	0	0	0	0	0	0	0	0	0	0	-0.136936506276672	0	0	1.01781170483461	0	0	0.254452926208651	0	0	0.254452926208651	0	0	-0.0487991913276861	0	0.440437599278968	0.89058524173028	-0.234783864398003	0	-0.0978473581213307	0.127226463104326	0	-3.3447364096742	-0.0978473581213307	-0.166315611259666	1.4211519596859	-0.195694716242661
1183	0	0	0	0	0	0	0	0	0	0	0	0	0	0	0	0	0	0	0	0	0	0	0	0	0	0	0	0	0	0	0	0	0	0	0	0	0	0	0	0	0	0	-0.00278963372109242	0	0	0	0	0	-0.00278963372109242
1184	0.0199004975124378	0	0	0	-0.00949036727721363	0	0.0199004975124378	0	0	-0.00949036727721363	0.0398009950248756	0	0	0	0	0.0104101302352242	0	0	0	0	0	0	0.0398009950248756	0	0	0	0	0	0	0	0	0	0	0	0	0	0	0	0	0	0	0	0	0	0	0	0	0	0.0398009950248756
1185	0	0	0	0	-0.00691706439786954	0	0.00798148295953388	0	0	0	0	-0.00691706439786954	0	0	0	0	0	0	0	0	0	0	0	0	0	0	0	0	0	0	-0.00691706439786954	0	0	-0.0138341287957391	0	0	0	0	0	0	0	0	0	0	0	0	0	0	0
1186	0	0	0	0	0	0	0	0	0	0	0	0	0	0	0	0	0	0	0	0	0	0	0	0	0	0	0	0	0	0	0	0	0	0	0	0	0	0	0	0	0	0	0	0	0	0	0	0	0
1187	0	0	0	0	0	0	0	0	0	0	0	0	0	0	0	0	0	0	0	0	0	0	0	0	0	0	0	0	0	0	0	0	0	0	0	0	0	0	0	0	0	0	0	0	0	0	0	0	0
1188	0	0	0	0	0	0	0	0	0	0	0	0	0	0	0	0	0	0	0	0	0	0	0	0	0	0	0	0	0	0	0	0	0	0	0	0	0	0	0	0	0	0	0	0	0	0	0	0	0
1189	0	0	0	0	0	0	0	0	-0.0115326951908661	0	0	0	0	0	0	0	0	0	-0.0115326951908661	0	0	0	0	0	0	0	0	0	0	0	0	0	0	0	0	0	0	0	0	0	0	0	0	0	0	0	0	0	0
1190	0	0	0	0	0	0	-0.103788271925272	0	0	0	0	0	0	0	0	-0.0259470679813181	0	0	0	0	0	-0.0259470679813181	0	0	0	0	-0.0259470679813181	0	0	0	0	0	0	0	0	0	0	0	-0.0518941359626362	0	0	0	0	0	0	0	0	0	-0.0259470679813181
1191	0	0	0	0	0	0	0	0	0	0	0	0	0	0	0	0	0	0	0	0	0	0	0	0	0	0	-0.0019257062527682	0	0	0	0	0	0	0	0	0	0	0	0	0	0	0	0.00669378247215769	0	0.00415696707682075	0.0083139341536415	0	-0.0019257062527682	0
1192	0	-0.0233644859813084	0	0	0	0	0	0	0	0	0	0	0	0	0	0	0	0	0	0	0	0	-0.0700934579439252	0	-0.0233644859813084	0	0	0	0	0	0	0	0.0525656582859657	0	0	0	-0.0554928717915965	0	0	0	-0.0087638998289797	0	0	0	0	0	0	0	0
1193	0	0	0	0	0	0	0	0	0	0	0	0	0	0	0	0	0	0	0	0	0	0	0	0	0	0	0	0	0	0	0	0	0	0	0	0	0	0	0	-0.0223313979455114	0	0	0	0	0	0	0	0	0
1194	0	0	0	-0.00591856060606061	0	0	0	0	0	0	0	0.0343445907269605	0	0	0	0	0	0	0	0	0	0	0	0	0	0	0	0	0	0	0	0	-0.00591856060606061	0	0	-0.00591856060606061	0	0	0	0	0	0	0	0	0	0	0	0	0
1195	0	0	0	0	0	0	0	0	0	0	0	0	0	0	0	0	0	0	0	0	0	0	0	0	0	0	0	0	0	0	0	0	0	0	0	0	0	0	0	0	0	0	0	0	0	0	0	0	0
1196	0	0	0	0	0	0	0	0	0	0	0	0	0	0	0	0	0	0	0	0	0	0	0	0	0	0	0	0	0	0	0	0	0	0	0	0	0	0	0	0	0	0	0	0	0	0	0	0	0
1197	0	0	0	0	0	0	0	0	-0.00912575287461216	0	0	0	0	0	0	0	0	0	0	0	0	0	0	0	-0.00912575287461216	0	0	0	0	0	0	0	0	0	0	0	-0.0182515057492243	0	0	0	0	0	0	0	0	0	0	0	0
1198	0	0	0	0	0	0	0	0	0	0	0.0236127508854782	0	0	0	0	0	0	0	0	0	0	0	0	0	0	0	0	0	0	0	0	0	0	0	0	0	0	0	0	0	0	0	0	0	0	0	0.0066030553590281	0	0.24273056421381
1199	0	0	0	0	0	0	0	0	0	0	0	0	0	0	0	0	0	0	0	0	0	0	0	0	0	0	0	0	0	0	0	0	0	0	0	0	0	0	0	0	0	0	0	0	0	0	0	0	0
1200	0	0	0	0	0	0	0	0	0	0	0	0	0	0	0	0	0	0	-0.029146021568056	0	0	0	0	0	0	0	0	0	0	0	0	0	0	0	0	0	0	0	0	0	0	0	0	0	0	0	0	0	0
1201	0	0	0	0	0	0	0	0	0	0	0	0	0	-0.00159015376786935	0	0	0	0	0	0	0	0	0	0	0	0	0	0	0	0	0	0	0	0	0	0	0	0	-0.00159015376786935	0	0	0	0	0	0	0	0	0	0
1202	0	0	0	0	0	0	0	0	0	0	0	0	0	0	0	0	0	0	0	-0.00612444879960804	0	0	0	0	0	0	0	0	0	0	0	0	0	0	0	0	0	0	0	0	0	0	0	0	0	0	0	0	0
1203	0	0	0	0	0	0	0	0	0	0	0	0	0	0	0	0	0	0	0	0	0	0	0	0	0	0	0	0	0	0	0	0	0	0	0	0	0	0	0	0	0	0	0	0	0	0	0	0	0
1204	0	0	0	0	0	0	0	0	0	0	0	0	0	0	0	0	0	0	0	0	0	0	0	0	0	0	0	0	0	0	0	0	-0.00902608538676776	0	0	0	0	0	0	0	0	0	0	0	0	0	0	0	0
1205	0	0	0	0	0	0	0	0	0	0	0	0	0	0	0	0	0	0	0	0	0	0	0	0	0	0	0	0	0	0	0	0	0	0	0	0	0	0	0	0	0	0	0	0	0	0	0	0	0
1206	0	0	0	0	0	0	0	0	0	0	0	0	0	0	0	0	0	0	0	0	0	0	0	0	0	0	0	0	0	0	0	0	0	0	0	0	0	0	0	0	0	0	0	0	0	0	0	0	0
1207	0	0	0	0	0	0	0	0	0	0	0	0	0	0	0	0	0	0	0	0	0	0	0	0	0	0	0	0	0	0	0	0	0	0	0	0	0	0	0	0	0	-0.00699839037021485	0	0	0	0	0	0	0
1208	0	0	-0.00899280575539568	-0.026978417266187	0	0	0	0	-0.00899280575539568	0	0	0	0	0	0	0	0	0	0	0	-0.00899280575539568	0	0	0	0	0	0	0	0	0	0	0	0	0	0	0	0	0	0	0	0	0	0	0	0	0	0	0	0
1209	0	0	0	0	0	0	0	0	0	0	0	0	0	0	0	0	0	0	0	0	0	-0.0146198830409357	0.0242895312120476	0	0	0	0	0	0	0	-0.043859649122807	0.0242895312120476	0	0	0	-0.00518105643835959	0	-0.0146198830409357	-0.0292397660818713	0	-0.136760003806781	0	0	-0.0490407055611666	0.0096696481711119	0	-0.0488098839926308	0	0
1210	0	0	0	0	0	0	0	0	0	0	0	0	0	0	0	0	0	0	0	0	0	0	0	0	0	0	0	0	0.016366612111293	0	0	0	0	0	0	0	0	0	0	0	0	0	0	0.0327332242225859	0	0	0	0	0
1211	0	0	0	0	0	0	0	0	0	-0.0416319733555371	0	0	0	0.0093104616928582	0	0	0	0	0	0	0	0	0	0	0	0	0	0	0	-0.0323215116626788	0	0	0.0509424350483953	0	-0.0416319733555371	0	0	0	0	0	0	0	0	0	0	0	0	0	0
1212	0	0	0	0	0	0	0	0	0	0	0	0	0	0	0	0	0	0	0	0	0	0	0	0	0	0	0	0	0	0	0	0	0	0	0	0	0	0	0	0	0	0	0	0	0	0	0	0	0
1213	0	0	0	0	0	0	0	0	0	0	0	0	0	0	0	0	0	0	0	0	0	0	0	0	0	0.0324359390204346	0	0	0	0	0.0973078170613039	0	0	0	0	0.0324359390204346	0	0	0.0324359390204346	0	0	0.0324359390204346	0.493594194786597	0.051978634100694	0	0.0066494511400839	0	0	0
1214	0	0	0	0	0	0	0	0	0	0	0	0	0	0	0	0	0	0	0	0	0	0	0	0	0	0	0	0	0	0	0	0	0	0	0	0	0	0	0	0	0	0	0	0	0	0	0	0	0
1215	0	0	0	0	0	0	0	0	0	0	0	0	0	0	0	0	-0.0428449014567266	0	0	0	0	0	0	0	0	0	0	0	0	0.18348623853211	0	0	0	0	0	0	0	0	0	0	0	0	0	0	0	0	0.140641337075383	0	0.140641337075383
1216	0	0	0	0	0	0	0	0	0	0	0	0	0	0	0	0	0	0	0	0	0	0	0	0	0	0	0	0	0	0	0	0	0	0	0	0	0	0	0	0	-0.0178316690442225	0	0	-0.0178316690442225	0	0	0	0	0
1217	0	0	0	0	0	0	0	0	0	0	0	0	0	0	0	0	0	0	0	0	0	0	0	0	0	0	0	0	0	0	0	0	0	0	0	0	0	0	0	0	0	0	0	0	0	0	0	0	0
1218	0	0	0	0	0	0	0	0	0	0	0	0	0	0	0	0	0	0	0	0	0	0	0	0	0	0	0	0	0	0	0	0	0	0	0	0	0	0	0	0	0	0	0	0	0	0	0	0	0
1219	0	0	0	0	0	0	0	0	0	0.0834028356964137	0	0	-0.013215521791509	0	0	0	0	0	0.236992985297732	0	0	0	-0.0966183574879227	0	0.0834028356964137	0	0	0.236992985297732	0	-0.0483091787439614	0	0	0.272086642250184	0	0	0.043756270321887	-0.013215521791509	0.544173284500369	0	0	0	0	0	0	0	0.166805671392827	0	0.0834028356964137	0
1220	0	0	0	0	0	0	0	0	0	0	0	0	0	0	0	0	0	0	0	0	0	0	0	0	0	0.0209205020920502	0	0	0	0	0	0	0	0	0	0	0	0	0	0	0	0	0	0	0	0	0	-0.0070482097547223	0
1221	0	0	0	0	0.0157641605154594	0	0	0	0	-0.0275633958103638	0	0	0	0	-0.0275633958103638	0	0	0	0	0	0	0	0	0	0	0	0	-0.0551267916207277	0	0	0	0	0	0	0	0	0	0	0	0	0.0433275563258232	0	0	0.0433275563258232	0	0	0	0	0
1222	0	0	0	0	0	0	0	0	0	0	0	0	0	0	0	0	0	0	0	0	0	0.0103076843787043	0	0	0	0	0	0	0	0	0	0	0	0	0	0	0	0	0	0	0	0	0	0	0	0	0	0	0
1223	0	0	0	-0.0181818181818182	0	0	-0.0363636363636364	0	0	-0.0363636363636364	0	0	0	-0.0181818181818182	0	0	0	-0.0181818181818182	0	0	0	0	0	0	0	-0.0363636363636364	0	0.0339789330615019	0	0	0	0	0	-0.0363636363636364	0.101936799184506	0	0	0.0339789330615019	-0.0181818181818182	0.0339789330615019	0	0	0	0	-0.0181818181818182	0	0	0.0679578661230037	0
1224	0	0	0	0	0	0	0	0	0	0	0	0	0	0.025419420437214	0	0	0	0	0	0	0	0	0	0	0	0	0	0	-0.00403697872512212	0	0	0	0	0	0.00887232284123176	0	0	0	0.0056337095070972	0	0	-0.0121109361753664	0.016946280291476	0	0.038328722003568	0	0.0278145166101767	0	0.0217816244075856
1225	0	0.0116301019682418	0	0	-0.00432395036104985	-0.0056656994759577	-0.00432395036104985	0	-0.00432395036104985	0	0	0	-0.00864790072209971	-0.0129718510831496	-0.00864790072209971	0.00797702616464582	0	0	0	0	0	0	0	0	-0.0359333520033067	0	0	0	0	0	-0.0172958014441994	0	0	0	0	-0.00864790072209971	0	-0.00067087455745389	-0.00432395036104985	0	0	0	0	0	0	0	0	0	0
1226	0	0	0	0	0	0	0	0	0	0	0	0	0	0	0	0	0	0	0	0	0	0	0	0	0	0	0	0	0	0	0	0	0	0	0	0	0	0	0	0	0	0	0	0	0	0	0	0	0
1227	0	0	0	0	0	0	0	0	0	0	0	0	0	0	0	0	0	0	0	0	0	0	0	0	0	0	0	0	0	-0.0038627935723115	0	0	0	0	0	0	0	0	0	0	0	0	0	0	0	0	0	0	0
1228	0	-0.00431015904486876	0	-0.00862031808973751	0	-0.00862031808973751	0	0	0	0	0	-0.00431015904486876	0	0	0	0	0	0	0	-0.00431015904486876	0	0	0	0	0	0	0	0	0	0	-0.00862031808973751	0	0	0	0	0	0	0	0	0	0	0	0	0	0	0	0	0	0
1229	0	-0.0133341908434845	0	0	0	0	0	0	-0.019361833952912	0	0	0	0	-0.00774473358116481	0	0	0	0	0	0	-0.0116171003717472	0	-0.019361833952912	-0.0038723667905824	0	-0.00774473358116481	0	0	0	0	0	0	0	0	0	-0.00774473358116481	0	0	0	0	0	0	0	0	0	0	0	0	0
1230	0	0	0	0	0	0	0	0	0	0	0	0	0	0	0	0	0	0	0	0	0	0	0	0	0	0	0	0	0	0	0	0	0	0	0	0	0	0	0	0	0	0	0	0	0	0	0	0	0
1231	0	0	0.0600240096038415	0	0	0	0	0	0	0	0	-0.042185192997258	0	0	0	0	0	0	0	0	0	0	0	0	0	0	0	0	0	0	0	0	0	0	0	0	0	0	-0.021092596498629	0	0	0	0	0	0	0	0	0	0
1232	0	-0.0403498446710355	-0.0212134068731438	0	0	0	0	0	0	0	0	0	0	0	0	-0.0424268137462877	0	0	-0.0212134068731438	0	0	0	0	0	0	0	0	0	0	0	0	0	0	0	0	0	0	0	0	0	0	0	0	0	0	0	0	0.0253673450236482	0
1233	0	0	0	0	0	0	0	0	0	0	0	0	0	0	0	0	0	0	0	0	0	0	0	0	0	0	0	0	0	0	0	0	0	0	0	0	0	0	0	0	0	0	0	0	0	0	0	0	0
1234	-0.0490196078431373	0	0	0	0	0	-0.0490196078431373	0	0	0	0	0	0	0	0	0	0	0	0	0	0	0	0	0	-0.0245098039215686	0	0	0	0	0	0	0	0	0	0	0	0	0	0	0	0	0	0	0	0	0	0	0	0
1235	0	0	0	0	0	0	0	0	0	0	0	0	0	0	0	0	0	0	0	0	0	0	0	0	0	0	0	0	0	0	0	0	0	0	0	0	0	0	0	0	0	0	0	0	0	0	0	0	0
1236	0	0	0	0	0	0	0	0	0	0	0	0	0	0	0	0	0	0	0	0	0	0	0	0	0	0	0	0	0	0	0	0	0	0	0	0	0	0	0	0	0	0	0	0	0	0	0	0	0
1237	0	0.0386922035209905	0	0	0	0	0	0	0.0667017876637094	0	-0.0534130968913578	0	-0.0106826193782716	0.0193461017604953	0	0	0	-0.0106826193782716	0	0	0	0	-0.0427304775130862	0	0	0	0	0	-0.0106826193782716	0	0	-0.0233843757525909	0	0	0	0	0	0	0	0	0	0.0473556859032142	0	0	-0.0106826193782716	0.0193461017604953	0	0.19808622599508	0
1238	0	0	-0.0442301547440914	-0.00414439056736707	0	0	0	-0.00414439056736707	-0.0124331717021012	0.0247963773276744	0	0	0	0	-0.0497326868084048	-0.112038477471967	-0.00828878113473414	0	-0.0124331717021012	-0.0207219528368353	0.0109350980520989	-0.0250762416337866	-0.00278624907042071	-0.00828878113473414	-0.0400857641767243	-0.00828878113473414	-0.0470164038145121	-0.00414439056736707	-0.0014281075734743	-0.502969332301417	-0.0165775622694683	0	0.0205820206837794	0	-0.0331551245389365	0	-0.0165775622694683	0	0	0.0123632056255732	0	0	-0.00414439056736707	0	-0.0748089284421916	0	0	0	-0.0290107339715695
1239	0	0	0	0	0	0	0	0	0	0	0	0	0	0	0	0	0	0	0	0	0	0	0	0	0	0	0	0	0	0	0	0	0	0	0	0	0	0	0	0	0	0	0	0	0	0	0	0	0
1240	0	0	0	0	0	0	0	0	0	0.0585823081429408	0	0	-0.0454029511918275	0	0	0	0	0	-0.113507377979569	0	0	0	0	0	-0.0454029511918275	0	0	0	0	0	0	0	0	0	0	0	0.0585823081429408	0	0	0	-0.0227014755959137	-0.0454029511918275	0	0	0	0	0	0	0
1241	0	0	-0.0313087038196619	0	0	0	0	-0.0313087038196619	0	-0.0313087038196619	0	0	0	0	0	0	0	0	0	0	0	0	0	0	0	0	0	0	0	0	0	0	0	0	0	0	0	0	0	0	0	0	0	0	0	0	0	0	0
1242	-0.146614129936773	0.053099598312927	0	0	0	-0.0366535324841932	-0.0123432241889553	0	-0.00916338312104829	0.00129914065454401	0	0	0	0	0	0	0	0	0	-0.00916338312104829	0	0	0	0	0	0	0	0	0	0	0	0	0	0	0	0	0.0302938503483793	0	0	0	0	0	0	0	0	0	0	0	0
1243	0	0	0	0	0	0	0	0	0	0	0	0	0	0	0	0	0	0	0	0	0	0	0	0	0	0	0	0	0	0	0	0	0	0	0	0	0	0	0	0	0	0	0	0	0	0	0	0	0
1244	0	0	0	0	0	0.0859106529209622	-0.0694927032661571	0	0	0	0	0	0	0	0	0	0	0	0	0	0	0	0	0	0	0	0	0	0	0	0	0.0859106529209622	0	0	0	0	0	0	0	0	0	0	0	0	0	0	0	0	0
1245	0	0	0	0	0	0	0	0	0	0	0	0	0	0	0	0	-0.0176087339320303	0	0	0	0	0	0	-0.0176087339320303	0.046882325363338	0	0	0	0	0	-0.0176087339320303	0	0	-0.0176087339320303	0	0	0	0	0	0	0	0	0	0	0	0	-0.0176087339320303	0	0
1246	0	0	0	0	0	0	0	0	0	0	0	0	0	0	0	0	0	0	0	0	0	0	0	0	0	0	0	0	0	0	0	0	0	0	0	0	0	0	0	0	0	0	0	0	0	0	0	0	0
1247	-0.00548095368594135	0	0	0	0.00518349574953349	0	0	0	0	0	0	0	0	0	0	0	0	0	0	0	0	0	0	0	0	0	0	0	0	0	0	0	0	0	0	0	0	0	-0.00274047684297068	0	0	0	0.00518349574953349	0	0	0	0	0	0
1248	0	0	0	0	0	0	0	0	0	0	0	0	0	0	0	0	0	0	0	0	0	0	0	0	0	0	0	0	0	-0.0289771080846132	0	0	0	0	0	0	0	0	0	0	0	0	0	0	0	0	0	0	0
1249	0	0	0	0	0	0	0	0	0.0650618087182824	0	0	0	0	0	0	0	0	0	0	0	0	0	0	0	0	0	0	0	0	0	0	0	0	0	0	0	0	0	0	0	0	0	0	0	0	0	0	0	0
1250	0	0	0	0	0	0	0	0	0	0	0	0	0	0	0	0	0	0	0	0	0	0	0	0	0	0	0	0	0	0	0	0	0	0	0	0	0	0	0	0	0	0	0	0	0	0	0	0	0
1251	0	0	0	0	0	0	0	0	0	0	0	0	0	0	0	0	0	0	0	0	0	0	0	0	0	0	0	0	0	0	0	0	0	0	0	0	0	0	0	0	0	0	0	0	0	0	0	0	0
1252	-0.0511189819922289	0	-0.117607813803947	-0.0126374320738026	-0.0442310122583091	-0.0063187160369013	0	0	0.0247056104505871	0	0	0	0	0.134856200823596	0	-0.0252748641476052	0.0156544766679987	0	0	0	0	0	0	-0.0126374320738026	0	0	0	0	0	0	0	0	-0.0189561481107039	0	0	0	0	0	0	0	0	0	0	0	-0.0063187160369013	0	0	0	0
1253	0	0	0	0	0	0	0	0	0	0	0	0	0	0	0	0	0	0	0	0	0	0	0	0	0	0	0	0	0	0	0	0	0	0	0	0	0	0	0	0	0	0.0487270069435985	0.0121817517358996	0	0	0	0	0	0
1254	0	0	0	0	0.0049443708729273	0.00571872786877328	0.0223386185282441	0	0	0	0	0	0.0194792545938575	0	0.0106630987417006	-0.0109011627906977	-0.00726744186046512	0	0.0085780918031598	-0.00363372093023256	0	0	0.0223386185282441	0.0649308486461918	0	-0.0109011627906977	0	0	0.0041700138770814	0	0	-0.079821530767407	0.0337760742657906	0	0	0	0	0.00571872786877328	0	0	-0.0407452872284041	0	0	0.00571872786877328	-0.00363372093023256	0	0	0	0
1255	-0.0542299349240781	0	0	0	-0.162689804772234	0	0	0	0	0	0	-0.0542299349240781	0	0	-0.0542299349240781	0	0	0	0	-0.0542299349240781	0	0	0	0	0	0	0	0	0	-0.162689804772234	0	0	0	0	0	0	0	0	0	0	0	0	0	0	0	0	0	0	0
1256	0	0	0	0	0	0	0	0	0	0	0	0	0	0	0	0	0	0	0	0	0	0	-0.00276717029165975	0	0	0	0	0	0	0	-0.00276717029165975	-0.00830151087497925	0	-0.00276717029165975	0	-0.0055343405833195	0	0	0	0	0	0	-0.00276717029165975	0	0	0	0	0.00267500657908855	0
1257	0	0	0.00288093111693699	-0.00257489732596913	-0.0055824554411323	-0.00128744866298456	0	-0.00257489732596913	0	0	0.00478044736185729	0	0.00288093111693699	0	-0.00128744866298456	0	0	0	0.00576186223387399	0	-0.00128744866298456	0.00288093111693699	-0.00257489732596913	0	0	-0.00257489732596913	0	0	0	0	0	0	0	0	0	0	-0.00128744866298456	0	0	0	0	0	0	0	0	0	0	0.00288093111693699	0
1258	0	0	0	-0.0658761528326746	0	0	0	0	0	0	0	0	0	0	0	0	0	0	0	0	0	0	0	0	0	0	0	0	0	0	0	0	0	0	0	0	0	0	0	0	0	0	0	0	0	0	0	0	0
1259	0	0	0	0	0	0	0	0	0	0	0	0	0	0	0	0	0	0	0	0	0	0	0	0	0	0	0	0	0	0	0	0	0	0	0	0	0	0	0	0	0	0	0	0	0	0	0	0	0
1260	0	0	0	0	0	0	0	0	0	-0.000135223212957629	0.000449111208917552	0	0	0	0	0	0	0	0	0	0	0	0	-0.000811339277745775	-0.000135223212957629	0	0	0	0	0	0.000449111208917552	0	0	0	0	0	0	0	0	0	0	0	0	-0.000676116064788146	0	0	0	-0.000270446425915258	0
1261	0	0	0	0	0	0	0	0	0	0	-0.0677506775067751	0	0	0	0	0	0	0	0	0	-0.0677506775067751	0	-0.0677506775067751	0	0	0	0	0	0	0	0	0	0	0	-0.0677506775067751	0	0	-0.0677506775067751	0	0	0	0	0	0	0	0	0	0	0
1262	0	0	0	0	0	0	0	0	0	0	0	0	0	0	0	0	0	0	0	0.0105207559155445	0	0	0	0	0	0	0.0255493101686254	0	0.0510986203372509	0	0	0	0	0	0	0	0	0	0	0	0	0	0	0.0766479305058763	0	0	0	-0.0150285542530809	0
1263	0	0	0	0	-0.000952507953441411	0	0	0	0	0	0	0	0	0	0	0	0	0	0	0	0	0	0	0	0	0	0	0	0	0	0.0261381525191357	-0.000952507953441411	0	0	0	0	0	0	0	0	0.0191366631127149	0	0	0.0280431684260185	0	0	0	0.0206705344869315	0.00451511007876286
1264	0	0	0	0	0	0	0	0	0	0	0	0	0	0	0	0	0	0	0	0	0	0	0	0	0	0	0	0	0	0	0	0	0	0	0	0	0	0	0	0	0	0	0	0	0	0	0	0	0
1265	0	0	0	0	0	0	0	0	0	0	0	0	0	0	0	0	0	0	0	0	0	0	0	0	0	0	0	0	0	0	0	0	0	0.0109039363210119	0	0	0	0	0	0	0	0	0	0	0	0	0	0	0
1266	0	0	0	0	0	0	0	0	0	0	0	0	0	0	0	0	0	0	0	0	0	0	0	0	0	0	0	0	0	0	0	0	0	0	0	0	0	0	0	0	0	0	0	0	0	0	0	0	0
1267	0	0	0	0	-0.0227769679300292	0	0	-0.00455539358600583	0	0	0	0	0	0	0	0	0	0	0	0	-0.00455539358600583	0	0	0	0	0	0	0	0	0	0	0	0	0	0	0	0	0	0	0	0	0	0	0	0	0	0	0	0
1268	0	0	0	0	0	0	0	0	0	0	0	0	0	0	0	0	0	0	0	0	0	0	0	0	0	0	0	0	-0.0188182160331201	0	0	0	0	0	0	0	0	0	0	0	0	0	0	0	0	0	0	0	0
1269	0.038113506479988	-0.036089400741489	-0.085165689482932	0.053160053862545	-0.0774952972643245	0.05374852797186	-0.04331843737811	0.00875600435152099	-0.197279202215458	-0.23342438539856	-0.060480426584882	0.001085612132914	-0.243357337968711	-0.023452532237807	0.099238189615798	0.00875600435152099	-0.011257019316111	-0.222258702168165	-0.048726269245172	-0.005849187449049	-0.072970176561236	-0.070413379155034	0.055863969796076	-0.067856581748831	-0.178793146262727	-0.132273654927487	-0.033091247753301	-0.010962782261453	0.0859570645611879	-0.0449925236203393	-0.0127839870310114	0.00167408624222901	-0.0525157973116173	0.124806163677821	-0.076115448076754	-0.0427299632687945	-0.0154879029645425	-0.038351961093034	0.000497138023597965	-0.0973612024046275	-0.087722486889134	-0.0154879029645425	0.135768945939274	-0.0794636205612118	-0.0176033447887583	-0.008111747800594	-0.0252737370073652	0.0540427650265178	-0.067709463221503
1270	0.0055561729081009	0	0	0.0111123458162018	0	-0.0073177871011806	-0.0024392623670602	0	0	0	0	0.0055561729081009	0	0	0.0006776481739805	0	0	0	0	0	0	0	0	0	0	0	-0.0073177871011806	-0.0024392623670602	0	0	0	0	0	0	0	0.0031169105410407	0	0	0	-0.0073177871011806	0.0055561729081009	0	0	0	0	0	0	0	-0.0048785247341204
1271	0	0	0	0	0.053340445392719	0	0.00515849646674072	0	0	0	0	0	0	0	-0.00817661488143908	0	0	0	0.0133351113481798	0	0	0.015475489400222	0	0	0	0	0	0	0	-0.0142128517108359	0.0133351113481798	0	0	0	0	0	0	0	0	0	0	0	0	0	0	0	0.0133351113481798	0	0
1272	-0.00419334097453244	0.00939297874838558	0.00329870904934864	-0.00044731596259189	0	0.0023482446870964	-0.00698890162422074	-0.00139778032484415	-0.0106790941990928	-0.0209667048726622	-0.0251600458471947	-0.0144251192110334	-0.0040816761003955	-0.0130273388861892	0.0108465915102982	-0.00178926385036762	-0.00838668194906489	-0.00559112129937659	-0.00419334097453244	5.58324370684505e-05	0	-0.00419334097453244	-0.00603843726196849	-0.00139778032484415	-0.0153755835732856	-0.00279556064968829	0	0	0.00050314839966035	0	0	-0.00139778032484415	0	-0.00139778032484415	0	0	0	0	0	0	-0.00139778032484415	0	0	0	0	0	0.00095046436225225	0	0
1273	0	0	0	0	-0.0264924055104203	0	-0.0353232073472271	0	0	0	0	0	0	0	0	0	0	0	0	0	0	0.0172562553925798	0	0	0	0.0690250215703192	0	0	0	0	0	0	0	0	0	0	0	0	0	0	0	-0.00883080183680678	0	0	0	-0.00883080183680678	0	0	0
1274	0	0	0	0	0	0.0426894343649947	0	0	0	0	0	0	0	0	0	0	0	-0.0145327713995059	0	0	0	0	0.0213447171824973	-0.0145327713995059	0	0	0.0281566629654888	0	0	0	0	0	0	0	0	0	0	0	0	0	0	0	0	0	0	0	0	0	0
1275	0	0	0	0	0	0	0	0	0	0	0	0	0	0	0	0	0	0	0	0	0	0	0	0	0	0	0	0	0	0	0	0	0	0	0	0	0	0	0	0	0	0	0	0	0	0	0	0	0
1276	0	0	0	0	0	0	0	0	0	0	0	0	0	-0.0403551251008878	0	0	0	0	0	0	0	0	0	0	0	0	0	0	0	0	0	0	0	0	0	0.0692520775623269	0	0	0	0	0	0	0	0	0.138504155124654	0	-0.0403551251008878	0.138504155124654	0
1277	0	0	0	0	0	0	0	0	0	0	0	0	0	0	0	-0.01998001998002	0	0	0	0	0	0	0	0.0214224507283633	0.08857466441014	0	0	0	0	0	0	0	0	0	0	0	0.04428733220507	0	0	0.0214224507283633	0.0428449014567266	0	0	0	0	0.107112253641817	0.15284201659523	1.50988257672062	0
1278	0	0	0	0	0	0	0	0	0	0	0.0529801324503311	0	0	0	0	0	0	0	0	0	0	0	0	0	0	0	0	0	0	0	0	0	0	0	0	0	0.0264900662251656	0	0	0	0	0	0	0	0.0264900662251656	0	0	0	0
1279	0	0	0	-0.00286221306314042	0	0	0	0	0	0	0	0	0	0	0	0	0	-0.0143110653157021	-0.00572442612628084	0	0	0	0	-0.00286221306314042	0	0	0	-0.00572442612628084	0	0	0	0	0.00649814802781207	0	0	0	0	-0.00286221306314042	0	0	0	0	0	0	0	0	0	0	0
1280	0	0	0	0	0	0	0	0	0	0	0	0	0	0	0	0	0	0	0	0	0	0	0	0	0	0	0	0	0	0	0	0	0	0	0	0	0	0	0	0	0	0	0	0	0	0	0	0	0
1281	0	0	0	0	0	0	0	0	0	0	0	0	0	0	0	0	0	0	0	0	0	0	0	0	0	0	0	0	0	0	0	0	0	0	0	0	0	0	0	0	0	0	0	0	0	0	0	-0.00746602956547708	0
1282	-0.046815468528576	-0.256102450594013	-0.138279429579036	-0.153661470356408	-0.666025308961741	-0.107515348024293	-0.171704097656008	-0.010730213929376	-0.18650466007738	-0.119320650825206	-0.0290196464867446	-0.03700140605343	-0.0115584975431441	-0.016879670587601	-0.067518682350404	-0.0390805142196591	-0.0666025308961741	-0.0888033745282321	-0.11100421816029	-0.0384990358636596	0.011223824444913	-0.00299525962045902	-0.0935430692166895	-0.010977019187145	0.031010886812512	-0.115743912848748	-0.047978425240575	-0.705193691021857	-0.050639011762803	-0.05596018480726	-0.143600602623493	-0.05687633626149	0	0	-0.044401687264116	0.0174611489436005	-0.029601124842744	0	-0.00740028121068601	0	0	0.0174611489436005	-0.00740028121068601	0	-0.022200843632058	0	0	0	0
1283	0	0	0	0.00514434882098645	0	0	0	0	0.0266098988823842	0	0	0	0	0	0	0	0	0	0	0	0	0	0	0	0	0	0	0	0	0	0	0	0	0	0	0	0	0	0	0	0	0	0	0	0	0	0	0	0
1284	0	0	0	0	0	0	0	0	0	0	0	0	0	0	0	0	0	0	0	0	0	0	0	0	0	0	0	0	0	0	0	0	0	0	0	0	0	0	0	0	0	0	0	0	0	0	0	0	0
1285	0	0	0	0	0	0	0	0	0	0	0	0	0	0	0	0	0	0	0	0	0	0	0	0	0	0	0	0	0	0	0	0	0	0	0	0	0	0	0	0	0	0	0	0	0	0	0	0	0
1286	0	1.53959109125727	-0.0640102416386622	0	3.40149831786657	0.0342700479780672	2.8302321380331	0.0685400959561343	2.01365734624462	0.0525375355464688	-0.0617453144799261	8.3018464585588	0.091189367543495	0.127872412978811	-0.0160025604096655	3.06987020596359	-0.029740193660595	-0.9773407473777	0.0525375355464688	0.0022649271587361	-15.4853727933001	-0.521289712042754	-0.0480076812289966	0.0868075835245365	-0.841637060833088	-0.0160025604096655	-0.086955653823049	0	-0.0480076812289966	0.0342700479780672	0	0.0182674875684017	0.127872412978811	0.0365349751368032	0	-1.07907052654127	-0.430100344499259	0.310547288662828	0.015854490111152	-0.0937504352992568	-0.0960153624579933	1.39994983158923	0.171350239890336	0	0	0	0.0525375355464688	0	0.0342700479780672
1287	0	0	0	0	0	0	0	0	0	0	0	0	0	0	0	0	0	0	0	0	0	0	0	0	0	0	0	0	0	0	0	0	0	0	0	0	0	0	0	0	0	0	0	0	0	0	0	0	0
1288	0.00383450285670463	0	0	0	-0.00622006593269889	0	0	0	0	0	0	0	0	0	0	0	-0.00622006593269889	-0.0124401318653978	0	0	0	0	0	0	0	0	0	0	0	0	0	0	0	-0.0109911920846874	0	0	-0.00622006593269889	0	0	0	0	-0.00238556307599426	0	0	0	0	0	-0.0124401318653978	0
1289	0	0	0	0	0	0.0860499367962054	0	0	0	0	0	0	0	0	0.033167495854063	0	0	0	0	0	0	0	0.066334991708126	0	0	0	0	0	0	0	0	0	0.033167495854063	0	0	0	0	0	-0.0233100233100233	0	0	0	-0.0233100233100233	0	0	0	0	0	0
1290	0	0	0	0	0	0	0	0	0	0	0	0	0	0	0	0	0	0	0	0	0	0	0	0	0	0	0	0	0	0	0	0	0	0	0	0	0	0	0	0	0	0	0	0	0	-0.0917431192660551	0	0	0
1291	0	0	0	0	0	0	0	0	0	0	0	0	0	0.085494442861214	0	0	0	0	0	0	0	0	0	0	0	0	0	0	0	0	0	0	0	0	0	0	0	0	0	-0.0351657072260062	0	0	0	0	0	0	0	0	0
1292	0	0	0	-0.010924186148132	0	0	0	0	0	0	0	0	0.0047892016582791	0	0	0	0	0.0157133878064111	0	0	0	0	0	0	0	0	0	0	0	0	0	0	0	0.0157133878064111	0	0	0	0	0	0	0.0314267756128221	0	-0.0218483722962639	0	0	0	0	0	0
1293	0	0	0	0	0	0	0	0	0	0	0	0	0	0	0	0	0	0	0	0	0	0	0	0	0	0.00931445603576751	0	0	0	0.00931445603576751	0	0	0	0	0	0	0	0	0	0	0	0	0	0	0	0	0	0	0
1294	0	0	0	0	0	0	0	0	0	0	0	0	0	0	0	0	0	0	0	0	0	0	0	0	0	0	0	0	0	0.0134354426978369	0	0	-0.00386428626632661	0	0	0	0	0.00895696179855793	0	0	0	0	0	0	0	0	0	0	0
1295	0	0	0	0	0	-0.012278978388998	0	0	0	-0.012278978388998	0	-0.0368369351669941	0	0	0	0	0	0	0	0	0	0	0	0	0	0	0	0	0	0	0	0	0	0	0	0	0	0	0	0	0	0	0	0	0	0	0	0	0
1296	0	0	0	-0.0675219446320054	0	-0.135043889264011	0	0	0	0	0	0	0	0	0.712205150884564	0	0	0	0	0	0	0	0	0	0	0	0	0	0	0	0	0	0	0	-0.0675219446320054	0	-0.202565833896016	0	0	0	0	0	0	0	0	0	0.194931773879142	0	0
1297	0	0	0	0	0	0	0	0	0	0	0	0	0	0	0	0	0	0	0	0	0	0	0	0	0	0	0	-0.00449337227589306	0	0	0	0	0	0	0	0	0	0	0	0	0	0	0	0	0	-0.00898674455178611	0	0	0
1298	0	-0.0061751265900951	0	0	0	0	0	0	0	0	0	0	0	0	0	0	0	0	0	0	-0.0185253797702853	0	0	0	0	-0.0061751265900951	0	0	0	0	0	0	0	0	0	0	0	0	0	0	0	0	0	0	0	0	0	0	0.346877407349671
1299	0	-0.00747104968248039	0	0	0	-0.00747104968248039	0	0	0	0	0	0	-0.00747104968248039	0	0	0	0	-0.00747104968248039	0	-0.0149420993649608	0	-0.00747104968248039	0	0	0	0	-0.00747104968248039	0	-0.00747104968248039	0	0	0	0	0	0	0	0	0	0	0	0	0	0	0	0	0	0	0	0
1300	0	0	0	0	-0.0013794308468326	0	0	0	0	0	0	0	-0.000459810282277532	0	0	0	0	0	0	0	0	0	0	0	0	0	0	0	0	0	0	0	0	0	0	0	0	0	0	0.000661826508798983	-0.000459810282277532	0	0	0.000863842735320438	0	0.000661826508798983	-0.00165831999300575	0	0
1301	-0.107050007646429	0.0412201154163232	0	0	0	0	0	0	0	0	0	0	-0.0152928582352042	0	0	0	0	0	0	0	0	0	0	0	0	0	0	0	0	0	0	-0.0305857164704083	0	0	0	0	0	0	0	0	0	0	0	0	-0.0152928582352042	0	0	0	0.0106343989459149
1302	0	0	-0.0733137829912024	-0.0366568914956012	-0.0733137829912024	0.0589622641509434	0	0	0	0	0	0	0.0223053726553422	0	0	-0.0366568914956012	-0.146627565982405	0	-0.0366568914956012	0	0	0.0589622641509434	0	0	-0.0366568914956012	0	0	0	-0.0366568914956012	0	0	0	-0.0733137829912024	0	-0.0366568914956012	0	0	-0.0366568914956012	0	0	-0.0366568914956012	-0.0510084103358606	0	0	0	0	-0.219941348973607	-0.109970674486804	0
1303	0	0	0	0.0569476082004556	0	0	0.0284738041002278	0	0	0	0	0.0569476082004556	0	0	0	0	0	0.0569476082004556	0	0	0	0	0	0	0	0	0	0	0	0	0	0	0	0	0	0	0	0	0	0	0	0	0	0	0	-0.0414336026517506	0	0.227790432801822	0
1304	0	0	0	0	0	0	0	0	0	0	0	0	0	0	0	0	0	0	0	0	0	0	0	0	0	0	0	0	0	0	0	0	0	0	0	0	0	0	0	0	0	0	0	0	0	0	0	0	0
1305	-0.0445831475702185	0	-0.0445831475702185	0	0	0	-0.0445831475702185	0.148928942954801	0	0	0	0	0	0	0	0	0	0	0	0	0	0	0	0	0	0	0	0	0	0	0	0.119047619047619	0	0	0	0	0	0	0	0	0	0	0	0	0	0	-0.0445831475702185	0	0
1306	-0.028328611898017	0	0	0	0	0	-0.084985835694051	0	0	-0.0154600941904	0	0	0	0	-0.028328611898017	0	-0.056657223796034	0	0	0	-0.056657223796034	0	0	-0.028328611898017	0	0	-0.028328611898017	0	-0.113314447592068	0	0	0.0630914826498423	-0.028328611898017	0	0	0.126182965299685	-0.0502229649422257	-0.028328611898017	-0.084985835694051	-0.056657223796034	0	0	0	0	-0.163537412534294	0	-0.056657223796034	-0.028328611898017	0
1307	0	0	0	0	-0.0264900662251656	0	0	-0.0264900662251656	0	-0.0264900662251656	0	0	0	0	0	0	0	0	0	0	0	0	0	0	0	0	0	0	0	0	0	0	0	0	-0.0529801324503311	0	0	0	0	0	-0.0264900662251656	0	0	0	0	0	-0.0264900662251656	0	0
1308	-0.0662251655629139	0	0	0	0	0	-0.0662251655629139	0	0	0	0	0	0	0	0	0	0	0	0	0	0	0	0	0	0	-0.0662251655629139	0	-0.0662251655629139	0	0	0	0	0	0	0	0	0	0	0	0	0	0	0	0	0	0	0	0	0
1309	0	0	0	0	0	0	0	0	0	0	0	0	0	0	0	0	0	0	0	0	0	0	0	0	0	0	0	0	0	0	0	0	0	0	0	0	0	0	0	0	0	0	0	-0.00667824228663016	0	0	-0.00667824228663016	0	0.0240269101393561
1310	0	0	0	0	0	0	0	0	0	0	0	-0.00963020030816641	0	0	0	0	0	0	0	0	0	0	0	0	0	0	0	0	0	0	0	0	0	-0.00963020030816641	0	0	0	0	0	0	0	0	0	0	0	0	0	0	0
1311	0	0	0	0	0	0	0	0	0	0	0	0	0	0	0	0	0	0	0	0	0	0	0	0	0	0	0	0	0	0	0	0	0	0	0	0	0	0	0	0	0	0	0	0	0	0	0	0	0
1312	0.105596620908131	0	0	0	0	0	0	0	0	-0.0338180588434224	0	0	0	0	0	0	0	0	0	0	0	0	0	0	0	0	0	0	0	0	0	0	0	0	0	0	0	0	0	0	0	0	0	0	0	0	0	0	0
1313	0	0	0	0	0	0	0	0	0	0	0	0	0	0	0	0	0	0	0	0	0	0	0	0	0	0	0	0	0	0	0	0	0	0	0	0	0	0	0	0	0	0	0	0	0	0	0	0	0
1314	0	0	0	0	0	0	0	0	0	0	-0.0125849484017116	0	0	-0.0125849484017116	0	0	0	0	0	0	-0.0125849484017116	0	0	0	0	-0.0125849484017116	0	0	0	0.030902348578492	0	0	0	0	0	0	0	0	0	0	0	0	-0.0125849484017116	0	0	0	0	-0.0125849484017116	0
1315	0	0	0	0	0	0	0	0	0	0.0207943439384487	0	0	0	0	0	0	0	0	0	0	0	0	0	0	0	0	0	-0.0102901831652603	0	0	0	0	0	0	0	-0.0205803663305207	0	0	0	0	0.0415886878768975	0	0	-0.0102901831652603	0	0	0	0.0207943439384487	-0.0102901831652603
1316	0	0	0	0	-0.0146316482551759	0.0410644998919683	0	0	0	0	0	0	0	-0.0219474723827639	-0.00731582412758797	0.0210039907582441	-0.0146316482551759	0	0	-0.00731582412758797	0	0	0	0	0	0	0	0	0	0	0	0	0	0	0	0	0	0	0.00318617125153403	0	0	0	0	0.010501995379122	0	0	0	0	0
1317	0	0	0.0150875075437538	0	0	0	0	0	0	0	0	0	0	-0.00395491398062092	0	0	0	0	-0.0237294838837255	0	0.0301750150875075	0	0	0	0	0	0	-0.00395491398062092	0	0	0	0	0	0	0	0	0	0	0	0	0	0	-0.000732148378729898	0	0	0	0	0	0
1318	0	0	0	0	-0.110772639158128	0	0	-0.147892333338763	0.0076816843233185	0.0522875816993464	-0.027693159789532	0	-0.0477046352557454	0	0.0599692660226649	0	0	-0.027693159789532	0.032276106233133	-0.00923105326317733	0	0	0	-0.016977897962471	0	-0.13846579894766	0	0	-0.0200114754662134	0	0.0076816843233185	0	0	-0.00923105326317733	0	0	0	0	-0.027693159789532	0	0	0	0	0.0430565284361691	0.0261437908496732	0	0	0.0261437908496732	0
1319	0	0	0	0	0	0	0	0	0	0	0	0	0	0	0	0	0	0	0	0.0385579332947754	0	0	0	0	0	0	0	0.0192789666473877	0	0	0	0	0	0	0	0	0	0	0	0	0	0	0	0	0	0	0	0	0
1320	0	0	0	0	0	0	0	0	0	0	0	0	0	0	0	0	0	0	0	0	0	0	0	0	0	0	0	-0.0209907640638119	0	0	0	-0.0629722921914358	0	0	0	0	0	0	0	0	0	0	0	0	0	0	0	0	0
1321	0	0	0	0	0	0	0	0	0	0	0	0	0	0	0	0	0	0	0	0	0	0	0	0	0	0	0	0	0	0	0	0	0	0	0	0	0	0	0	0	0	0	0	0	0	0	0	0	0
1322	-0.0911577028258888	0	0	0	0	0	0	0	0	0	0	-0.0911577028258888	0	-0.182315405651778	0	0	0	0	0	0	0	0	0	0	0	-0.0911577028258888	0	0	0	0	0	0	0	0	0	0	-0.0911577028258888	0	0	0	0	0	0	-0.140494385073411	0	0	-0.273473108477666	0	0
1323	0	0	0	0	0	0	0	-0.0062445360309729	0	0	0	0	0	0	0	-0.0018688511613511	0	0	0	0	0	0	0	-0.0062445360309729	0	0	0.0106202209005947	-0.0124890720619458	0	0	0	0	0	0	0	0	0	0	0	0	0	0	0	0	0	0	0	0	0
1324	0	0	0	0	0	0	0	0	0	0	0	0	0	0	0	0	0	0	0	0	0	0	0	0	0	0	0	0	0	0	0	0	0	0	0	0	0	0	0	0	0	0	0	0	0	0	0.132100396301189	0	0
1325	0	0.037593984962406	-0.0200561572402728	0	0	-0.0200561572402728	0.037593984962406	0	0	0	0.0175378277221332	0	0	0.037593984962406	0	0	-0.0200561572402728	0	0	0	0	0	-0.0200561572402728	0	0	0	0	0	0	0	-0.0401123144805455	0	0	0	0	0	0	0	0	0	0	0	0	0	0	0	0	-0.0200561572402728	0.0325573259261269
1326	0	0	0	0	0	0	0	0	0	0	0	0	0	0	0	0	0	0	0	0	0	0	0	0	0	0	0	0	0	0	0	0	0	0	0	0	0	0	0	0	0	0	0	0	0	0	0.0155860349127182	0	0
1327	0	0	0	0	0	0	0	0	0	0	0	0	0	0	0	0	0	0	0	0	0	0	0	0.00798977309044423	0	0	0	0	0	0	0	0	0	0	0	0	0	0	0	0	0	0	0	0	0	0	0	0	0
1328	0	0	-0.00181475029036005	0	0	0	0	0	0	0	0	0	0	0	0	0	0	0	0	0	0	0	0	0	0	0	0	0	0	0	0	0	0	0	0	0	0	0	0	0	0	0	-0.00362950058072009	0	0	0	0	0	0
1329	0	0	0	0	0	0	0	0	0	0	0	0	0.0203086921202275	0	0	0	0	0	0	0	0	0	0	0	0	0	0	0	0	0	0	0	0	0	0	0	0	-0.0181603559429765	0	-0.0181603559429765	0	0	0	0	0	0	0	0	0
1330	0	0	0	0	-0.0460935699469924	0	-0.0230467849734962	0	-0.0230467849734962	0	0	0	0	0	-0.0230467849734962	0	0.13081930046433	0	0.0442282176028306	-0.0460935699469924	0	0.065409650232165	-0.0691403549204886	0.0884564352056612	0	-0.0230467849734962	-0.115233924867481	-0.0230467849734962	0	-0.0921871398939848	-0.0460935699469924	0	-0.0230467849734962	0.0884564352056612	0	0	0	0	-0.0230467849734962	0	0	-0.0691403549204886	0	0.13081930046433	0	0	0	0	0
1331	0	0	0	0	0	0	0	0	0	0	0	0	0	0	0	0	0	0	0	0	0	0	0	0	0	0	0	0	0	0	0	0	0	0	0	0	0.00750581700818134	0	0	0	0	0	0	0	0	0	0	0	0
1332	0	0	0	0	0	0	0	0	0	0	0	0	0	0	0	0	0	0	0	0	0	0	0	0	0	0	0	0	0	0	0	0	0	0	0	0	0	0	0	0	0	0	0	0	0	0	0	0	0
1333	0	0	0	0	-0.066711140760507	0	0	0	0	0	0	0	0	0	0	0	0	0	0	0	0	0	0	0	0	0	0	0	0	0	0	0	-0.066711140760507	0	0	0	0	0	0	0	0	0	0	0	0	0	0	0	0
1334	0	0	0	0	0	0	0	0	0	0	0	0	0	0	0	0	0	0	0	0.0970402717127608	0	0.362605247341715	0	0	0	0	0	0	0	0	-0.0255558395093279	0	0	0	0	0	0	0.0485201358563804	0	0	0	0.120004568059813	0	0	0	0.0714844322034329	0	0	0.0970402717127608
1335	0	0	0	0	-0.00171080544720454	0	0	-0.00171080544720454	0	0	0	0	0.00523231477605693	0	0	0	0	0	0	0	-0.00171080544720454	0.00523231477605693	0	0	0	0	0	0	0	0	0	0	0	0	0	0	0	-0.00171080544720454	0	0	0	0	0	-0.00342161089440909	0	0	0	0	0
1336	0	0	0.029806259314456	0	0	0	0	0	0	0	0	0	0	0	0	0	0	0	0	0	0	0	0	0	0	0	0	0	0	0	0	0	0	0	0	0	0	0	0	0	0	0	0	0	0	0	0	0	0
1337	0	0	0	0	0	0	0.0154456057251712	0	0	-0.00173034330011074	0	0	0	0	-0.00173034330011074	0	0	0	-0.00173034330011074	0	0	0	0	0	0	0	0	0	0	0	0	0	0	0	0	0	0	0	0	0	0	0	-0.00173034330011074	0	0.0102970704834475	0	0	0	0
1338	0	0	0	0	0	0	0	0	0	0	0	0	0	0	0	0	0	0	0	0	0	0	0	0	0	0	0	0	0	0	0	0	0	0	0	0	0	0	0.036101083032491	0	0	0	0	0	0	0	0	0	0
1339	0.103466114847387	0	0.103466114847387	0	0	0.206932229694775	0	0	0	0	0	0	0	0	0	0	0.427938440744684	0	0	0	0	0.0517330574236937	0	0	0	0	0	0	0	0	0.103466114847387	0	0	0	0	0	0.036009660948077	0.354269703728048	-0.0297973778307509	0	-0.13491290779862	0	0	0	0	0	0	0	0
1340	0.0683526999316473	0	0	0	0	0	0	0	0	0	-0.0200120072043226	0	0	0	0	0	0	-0.0200120072043226	0	0	-0.0400240144086452	0	0	0	0.0083166783186795	0	-0.0400240144086452	0	0.136705399863295	-0.0200120072043226	0	0	0	0	0	0	-0.0200120072043226	0	0	0	0	-0.0200120072043226	0	0	0	0	0	-0.0200120072043226	0
1341	0	0	0	0	0	0	0	0	0	0	0	0	0	0	0	0	0	0	0	0	0	0	0	0	0	0	0	0	0	-0.0224719101123595	0	0	0	0	-0.0224719101123595	0	0	0	0	0	0	0	0.0525486074619023	0	0	0	0	-0.0224719101123595	0
1342	0	0	0	0	0	0	0	0	0	-0.0099009900990099	0	0	0	0	0	0	0	0	0	0	0	-0.0099009900990099	0	0	0	0	0	0	0	0	0	0	0	0	0	0	0	0	0	0	0	0	0	0.0202061022428774	-0.0099009900990099	0	0	0	0
1343	0.0608937492961664	0.187504530599273	-0.175504022322271	-0.189210534894645	-0.017651062723329	-0.0832846658182029	-0.252175972222258	-0.099826201981973	-0.024148381641675	0.213609203272525	0.090744146208436	-0.200050055787821	-0.21679041786353	-0.074997913692416	-0.051446009786554	-0.220933793926423	-0.048097937371413	0.086998421969418	-0.200050055787821	-0.115206750761918	0.081777487434768	0.000282254824006012	-0.271584500065226	0.07536359742849	-0.261739108731739	0.00590084118253198	0.054281033377951	-0.131068380277808	0.05782793170503	-0.184188426271933	-0.541976044658826	-0.298086824562354	0.039496962333818	-0.125449793919281	0.047783714459605	0.085523211673785	-0.046141646339836	-0.16151525492589	0.02885626735258	-0.077069601723863	0.022160122522297	0.22632158628521	0.080783357875079	-0.263015493115435	-0.041202966629191	-0.064357218711178	0.267806807738408	-0.028888235440382	-0.010159614245295
1344	0	0	0	0	0	0	0	0	0	0	0	0	0	0	0	0	0	0	0	0	0	0	0	0	0	0	0	0	0	0	0	0	0	0	0	0	0	0	0	0	0	0	0	0	0	0	0	0	0
1345	0	0	0	0	0	0	0	0	0	0	0	0	0	0	0	0	0	0	0	0	0	0	0	0.00885151582208453	0	0	0	0	0	0	0	0	0	0	0	0	0	0	0	0	0	0	0	0	0	0	0.0132772737331268	0	0
1346	0	0	0	0	0	0	0	0	0	0	0	0	0	0	0	0	0	0	0	0	0	0	0	0	0	0	0	0	0	0	0	0	0	0	0	0	0	0	0	0	0	0	0	0	0	0	0	0	0
1347	0	0	-0.00854408749145591	0	0	-0.00854408749145591	0	0	0.0421674045962471	0	0	0	0	0	-0.0170881749829118	0	0	0	0	0	0	0	0	-0.00854408749145591	0	0	0	0.117958126297285	0	0	-0.0256322624743677	0.0547070194029147	0.0421674045962471	0	0	0.0336233171047912	0	0	0	0	0.231367692418326	0	0	0	0.0210837022981235	0	-0.0950910281280798	-0.0170881749829118	0
1348	0	0	0	0	0	0	0	0	0	0	0	0	0	0	0	0	0	0	0	0	0	0	0	0	0	0	0	0	0	0	0	0	0	0	0	0	0	0	0	0	0	0	0	0	0	0	0	0	0
1349	0	0	0	0	0	0	0	0	0	0	0	0	0	0	0	0	0	0	0	0	0	0	0	0	0	0	0	0.0759878419452888	0	0	-0.0255004462578095	0	0	0	0	0	-0.0255004462578095	0	0	0	0	0	0	0	0	0	0	0	0
1350	0	0	0	0	0	0	0	0	0	0	0	0	0	0	0	0	0	0	0	0	0	0	0	0	0	0	0	0	0	0	0	0	0	0	0	0	0	0	0	0	0	0	0	0	0	0	0	0	0
1351	0.086389953480532	-0.354924578527063	-0.150226432204177	-0.354924578527063	-0.266193433895297	-0.384501626737652	-0.0591540964211772	0.11596700169112	-0.325347530316474	0.732402631811013	-0.20703933747412	-0.147885241052943	-0.325347530316474	0.291088099803418	-0.0887311446317657	-0.0295770482105886	-0.0591540964211772	-0.325347530316474	-0.177462289263531	0.11596700169112	-0.118308192842354	0.234275194533474	-0.354924578527063	0.263852242744063	0.498127437277538	0	-0.0591540964211772	-0.266193433895297	-0.236616385684709	-0.295770482105886	-0.147885241052943	-0.41407867494824	-0.0591540964211772	0	0.086389953480532	-0.147885241052943	2.42680070766405	0.636647913725545	0.204698146322886	-0.0887311446317657	-0.0591540964211772	-0.118308192842354	-0.147885241052943	0.409396292645773	1.84462450805721	-0.20703933747412	-0.0295770482105886	0.700484392449187	0.350242196224596
1352	0	0	0	0	0	0	0	0	0	0	0	0	0	0	0	0	0	0	0.0799360511590727	0	0	0.0458063583263082	0	-0.136518771331058	-0.0341296928327645	0	-0.068259385665529	0	0	-0.0341296928327645	0	0	0	0	0	0	0	0	0	0	0	0	0	0	0	0	0	0	0
1353	0	0	0	0	0	0	0	0	0	0	0	0	0	0	0	0	0	0	0	0	0	0	0	0	0	0	0	0	0	0	0	0	0	0	0	0	0	0	0	0	0	0	0	0	0	0	0	0	0
1354	-0.0133244503664224	-0.00444148345547413	0	-0.00444148345547413	0	-0.00444148345547413	0	0	0	0	0	0	-0.00888296691094826	0	0	0	0	0	0	0	0	0.00658265941741747	-0.00888296691094826	0	0	-0.00444148345547413	0	-0.0177659338218965	0	0	0	0	0	0	0	-0.00444148345547413	0	0	0	0	0	0	0	0	0	0.0110241428728916	0	0	0
1355	0	0	0	0	0	0	0	0	0.0294159089057411	0	0	-0.0023805934789966	0	0.0105988341282459	0	0	0	0.0211976682564918	-0.00648971380362126	0	0.0317965023847377	0	0	0	0	0	0.179952507125702	0.0529941706412295	0.0211976682564918	0.0677021250941	0.0317965023847377	0	0.0105988341282459	0	0.0317965023847377	-0.154479950550238	0	-0.041546549355202	0	-0.0054132535913618	-0.00648971380362126	-0.0201212080442324	0	0.0105988341282459	-0.0549503705413353	0	-0.0194691414108638	0.0211976682564918	0
1356	0	0	0	0	0	0	0	0	0	0	0	0	0	0	0	0	0	0	0	0	0	0	0	0	0	0	0	0	0	0	0	0	0	0	0	0	0	0	0	0	0	0	0	0	0	0	0	0	0
1357	0	0	-0.0991080277502478	0	0	0	0	0	0	0	0	0	0	0	0	0	0.165289256198347	0	-0.0991080277502478	0	0	0	0	0	0	0	0	0	0	0	0	0	-0.0991080277502478	0	0	0	0	0	0	-0.198216055500496	0	0	0	-0.0991080277502478	0	0	0	0	0
1358	0	0	0	0	0	0	0	0	0	0	0	0	0	0	0	0	0	0	0	0	0	0	0	0	0	0	0	0	0	0	0	-0.00745323097562794	0	0	0	0	0	0	0	0.0443262411347518	0	0.0295508274231678	0	0	0	0.0295508274231678	0	0.0591016548463357	0
1359	0	0	0	0	0	0	0	0	0	0	0	0	0	0	0	0	0	0	0	-0.0161459594736417	0	0	-0.00807297973682086	0	0	0	0	0	0	0	0	0	0	0	0	0	0	0	0	0	0	0	0	0	-0.00807297973682086	0	0	0	0
1360	0	0	0	0	0	0	0	0	0	0	0	0	0	0	0	0	0	0	0	0	0	0	0	0	0	0	0	0	0	0	0	0	0	0	0	0	0	0	0	0	0	0	0	0	0	0	0	0	0
1361	0	0	0	0	0	0	0	0	0	0	0	0	0	0	0	0	0	0	0	0	0	0	0	0	0	0	0	0	0	0	0	0	0	0	0	0	0	0	0	0	0	0	0	0	0	0	0	0	0
1362	0	0	0	0	0	0	0	0	0	0	-0.01478633742422	0	0	0	0	0	0	0	0	0	0	0	0	0	0	0	0	0	0	0	0	0	0	0	0	0	0	0	0	0	0	0	0	0	0.0948166877370417	0	0	0	0
1363	0	0	0	0	0	0	0	0	0	0	0	0	0	0	0	0	0	0	0	0	0	0	0	0	0	0	0	0	0	0	0	0	0	0	0	0	0	0	0	0	0	0	0	0	0	0	0	0	0
1364	0	0	0	0	0	0	0	0	0	0	0	0	0	0	0	0	0	0	0	0	0	0	0	0	0	0	0	0	0	0	0	0	0	0	0	0	0	0	0	0	0	0	0	0	0	0	0	0	0
1365	0	0	0	0	0	0	0	0	0	0	0	0	0	0	0	0	0	-0.0118680275338239	0	0	0	0	0	0	0	0	-0.0118680275338239	0	0	0	0	0	0	0	0	0	0	0	0	0	0	0	0	0	0	0	0	0	0
1366	0	0	0	-0.00702148574638393	-0.0140429714927679	0	0	0	0	0	0	0	0	0	0	0	0	0	0	0	0	0	0	0	-0.0210644572391518	0	0	0	0	0	0	0	0	0	0	0	0	0	0	0	0	0	0	0	-0.00702148574638393	0	0	-5.51090682266997e-05	0
1367	0	-0.0251004016064257	0	-0.0376506024096386	0	0	0	0	0	0	0	0	0	0	0	0	0	0	0	0	0	0	0	0	0	0	0	0	0	0	0	0	0	0	0	0	0	0	0	0	0	0	0	0	0	0	0	0	0
1368	0	0	0	0	0	-0.0210084033613445	0	0	0	0	0	0	0.000392014312086103	0	0	0	0	0	0	0	0	0	0	0	0	0	0	0	0	0	0	0	0	0	0	0	0	0	0	0	0	0	0	0	0	0	0	0	0
1369	0	0	0	0	0	0	0	0	0	0	0	0	0	0	0	-0.00470101541933058	0	0	0	0	0	0	0	0	0	0	0	0	0	0	0	0	0	0	0	0	0	0	0	0	0.0282832092014707	0	0	0	0	0	0	0	0
1370	0	0	0	0	0	0	0	0	0	0	0	0	0	0	0	0	0.0310029452798016	0	-0.00763475339746526	0	0	0	0	0	0	0	0	0	0	0	0	0	0	0	0.0155014726399008	0	0	0.000463931689940598	0	0	0	0	-0.0150375409499602	0	0	0	0	0	0
1371	0	0	-0.00795102170628926	0	0	-0.00795102170628926	0	-0.00795102170628926	0	0	0	0	0	0	0	-0.00795102170628926	0	0	0	0	0	-0.00795102170628926	0	0	-0.000553903888672099	0	-0.00795102170628926	-0.0159020434125785	0	0	0	-0.00795102170628926	0	0	0.0232991612301957	0	0	0	0	0	0	0	0	0	0	0	0	0	0
1372	0	0	0	0	0	0	0	0	0	0	0	0	0	0	0	0	0	0	0	0	0	0	0	0	0	0	0	0	0	0	0	0	0	0	0	0	0	0	0	0	0	0	0	0	0	0	0	0	0
1373	0	0	-0.0489236790606654	0.0946297610598533	0	0	0	0	0	0	0	0	0	0	-0.0268750373264407	0	0.0236574402649633	0	0.0236574402649633	0	0	-0.00815394651011089	0	0	0	0	0	0	0	0	0	0	0	0	0	-0.0163078930202218	0	0	-0.00815394651011089	0.0473148805299267	0	0	0	0	0	0	0	-0.00815394651011089	0
1374	0	0	0	0	0	0	0	0	0	0	0	-0.0043917435221783	0	0	0	0	0	0	0	0	0	0	0	0	0	0	0	0	0	0	0	0	0	0	0	0	0	0	0	0	0	0	0	0	0	0	0	0	0
1375	0	0	0	0	0	0	0	0	0	0	0	0	0	0	0	0	0	0	0	0	0	0	0	0	0	0	0	0	0	0	0	0	0	0	0	0	0	0	0	0	0	0	0	0	0	0	0	0	0
1376	0	0	0	0	0	0	0	0	0	0	0	-0.00173840483971907	0	0	0.0181028650015507	0	-0.00173840483971907	0	0	0	0	0	0	0	0	0	0	0	0	-0.00347680967943815	0.0330687830687831	0	0.00661375661375661	0	0	0	0	0	0	-0.00173840483971907	0	0	0	0	0	0	0	0	0
1377	0	0	0	0	0	0	0	0	0	0	0	0	0	0	0	-0.00992555831265509	0	0	0	0	0	-0.0198511166253102	0	0	0	0	0	0	0	-0.00992555831265509	0	0	0	0	0	0	0	0	0	0	0	0	0	0	0	0	0	0	0
1378	0	0	0	0.00982125319190729	0	0.0338693615355684	0	0	0	0	0	0	0	0	0	0	0	0	0	0	0	0	0.0196425063838146	0	0	0	0	0	0	0	0	0	0	0	0	0	0	-0.00541565123206066	0	0	0	0	0	0	0	0	0	0	0
1379	0	-0.0044907490569427	0	0	0	0	0.0121197430614471	0	0	0	0	0	0	0	0	0	0	0	0	0	0	0	0	0	0	0	0	0	0	0	0	-0.0044907490569427	0	0	0	0	0	0	0	0	0	0	0	0	0	0	0	0.0121197430614471	0
1380	0	0	0	0	0	0	0	0	0	0	0	0	0	0	0	0	0	0	0	0	0	0	0	0	0	0	0	0	0	0	0	0	0	0	0	0	0	0	0	0	0	0	0	0	0	0	0	0	0
1381	0	0	0	0	0	0	0	0	0	0	0	0	0	0	0	0	0	0	0	0	0	0	0	0	0	0	0	0	0	0	0	0	0	0	0	0	0	0	0	0	0	0	0	0	0	0	0	0	0
1382	0	0	0	0	0	0	0	0	0	0	0	0	0	0	0	0	0	0	0	0	0	0	0	0	0	0	0	0	0	0	0	0	0	0	0	0	0	0	0	0	0	0	0	0	0	0	0	0	0
1383	0	0	0	0	0.00789079144638207	0	0	0	0	0	0	0	0	0	0	0	-0.00572540936676972	-0.00286270468338486	0.00719346884260951	0	0	0	-0.00286270468338486	0	0	0	0	-0.00572540936676972	0	-0.00286270468338486	0	0	0	0	0	0.00502808676299721	-0.00572540936676972	0	0	0	0	0	-0.00286270468338486	0	0	0	0	0	0
1384	0	0	0	0	0	0	0	0	0	0	0.0497760079641613	0	0	0	0	0	0.10598168665798	0	0	-0.0433463372345037	0	0	0	0	0.0995520159283226	0	0	0	0.0497760079641613	0	-0.0866926744690074	0	0	0	0.0995520159283226	0	0	0	0	0	0	0	0	0	-0.0866926744690074	0	0.0497760079641613	0	0
1385	0	0	0	0	0	0	0	0	0	0	0	0	0	0	0	0	0	0	0	0	0	0	0	0	0	0	0	0	0	0	0	0	0	0	0	0	0	0	0	0	0	0	0	0	0	0	0	0	0
1386	0	0	0	0	0	0	0	0	0	0	0	0	0	0	0	0	0	0	0	0	0.0409030074004093	-0.0570776255707763	-0.0142694063926941	0	0	0	0	0	0	0	0	0	0	0	0	0	0	0	0	0	0	0	0	0	0	0	0	0	0
1387	0	0	0	0	0	0	0	0	0	0	0.0364697301239971	0	0	0	0	0	-0.0525486074619023	0	0	0	-0.0175162024873008	0	0	0	0	0	0	0	0	0	0	0	0	0	0	0	0	0	0	-0.0175162024873008	0	0	0	0	0	0	0	0	0
1388	0	0	0	0	0	0	0	0	0	0	0	0	0	0	0	0	0	0	0	0	0	0	0	0	0	0	0	0	0	0	0	0	0	0	0	0	0	0	0	0	0	0	0	0	0	0	0	0	0
1389	0	0	0	0	0	0.00221745921968819	0	0	0	0	0	0	0.0162813415825464	-0.00962896392348183	0	0.0054271138608488	0	0.0217084554433952	0	-0.00320965464116061	0	0	0	0	-0.00420185006263303	0	0	0.0054271138608488	0	0	0	0	0	-0.0395080511153998	0	-0.0093958955467385	0	0	0	0	0	0	0	0	0	0	0	0	0
1390	0	0	0	0	0	0	0	0	0	0	0	0	0	0	0	0	0	0	0	0	0	0	0	0	0	0	0	0	0	0	0	0	0	0	0	0	0	0	0	0	0	0	0	0	0	0	0	0	0
1391	0	0	0	0	0	0	0	0	0	0	0	0	0.00414318859794498	0	0	0	-0.00296142740801066	0	0	0	0	0	0	0	0	0	0	0	0	0	0	0	0	0	0	0	0	-0.00148071370400533	0	-0.00148071370400533	0	0	0	0.00414318859794498	0	0	0	0	0
1392	0	-0.0171880371261602	0	-0.0171880371261602	0	0	0	0	0	0	0	0	0	0	0	0	-0.0171880371261602	0	0	0	-0.0171880371261602	0	0	0	0	0	0.0292587812667799	0	0	0	0	0	0	0	0	0	0	0	0	0	0	-0.0171880371261602	0	0	0	0	0	0	0
1393	0	0	0.429193892408218	0	0	0.98167285540746	0	0	0	0.784825974742064	0	0	0	0.540478918691392	2.30903929491432	0.0353232073472271	0.0488694112101337	0	-0.603071457494616	0.0188616081043988	0	0.111285026283174	0.032407811967306	0.6755871098601	0.233200861049333	0.0135462038629065	-0.0435540069686411	0	0.0353232073472271	-1.70119858904094	-0.122946607802859	-0.0164615992428279	-4.73625594925273	0.187246845219121	0.00240000886157199	-0.422509252341855	0.488178725582987	0	0	-0.0653310104529617	0	-1.48958242307357	-0.0217770034843206	0	-0.471378663551988	0	0	-0.152439024390244	0
1394	0	0	0	0	0	0	0	0	0	0	0	0	0	0	0	0	0	0	0	0	0	0	0	0	0	0	0	0	0	0	0	0	0	0.0160694198939418	0	0	0	0	0	0	0	0	0.0482082596818255	0	0	0	0	0	0
1395	0	0	0	0	0	0	0	0	0	0.107758620689655	0	0	0	0	0	0	0	0	0	0	0	0	0	0	0	0	0	0	0	0	0	0	0	0	0.17730554860132	0	0	0	0.107758620689655	0	0.10088216304534	0	0.107758620689655	-0.0382116927779901	-0.0764233855559801	0	0	0	0.107758620689655
1396	0	0	0	0	0	0	0	0	0	0	0	0	0	0.0421052631578947	0	0	0	0	0	0	0	0	0	0	0	0	0	0	0	0	0	0	0	0	0	0	0	0	0	0	0	0	0	0	0	0	0.0421052631578947	0	0
1397	-0.0116904372223521	0	0	0	0.0255623721881391	0	0	0.0255623721881391	-0.0116904372223521	0	0	0	0	0	0	0.0255623721881391	0	0	0	0	0	0	0	0	0	0	0	0.0511247443762781	0	0	0	0	0	0	0	0	0	-0.0116904372223521	0	0	0	0	0	0	0	-0.0116904372223521	0	0	0
1398	0	0	0	0.0488326585895631	0	0	-0.0123107226394189	0	-0.0123107226394189	0	0.323567642151869	-0.0123107226394189	0	0	0.0365219359501441	0	0	0	0	0	0	0.030571690614491	0.0424721812857972	0	0	0	0	0	0	-0.0123107226394189	0	0.0976653171791261	0	0	0	0	0.030571690614491	0	0	-0.013131186575644	0	-0.0246214452788379	0	-0.0492428905576757	0	0	-0.0123107226394189	0.030571690614491	-0.0492428905576757
1399	-0.0153350713080816	0	0	-0.0516878502935313	-0.0613402852323263	-0.0306701426161632	0	-0.0363527789854497	-0.0306701426161632	-0.0460052139242447	-0.0766753565404079	-0.0056826363692866	0	-0.0460052139242447	0.0249875062468766	0	0	0.0249875062468766	0	0	0	0	-0.0306701426161632	0.0749625187406297	-0.0113652727385732	-0.0153350713080816	0.0249875062468766	0	0	0	0	0	0	0	0	0	0	0	0	0	0	0	0	0	0	0	0	0	0
1400	0	0	0	0	0	0	0	0	0	0	0	0	0	0	0	0	0	0	0	0	0	0	0	0	0	0	0	0	0	0	0	0	0	0	0	0	0	0	0	0	0	0	0	0	0	0	0	0	0
1401	0	-0.0674763832658569	0	0	0	0	0	0	0	0	0	0	0	0	0	0	0	0	0	0	0	0	0	0	0	0	0	0	0	0	0	0	0	0	0	0	0	0	0	0	-0.0674763832658569	0	0	0	0	0	0	0	0
1402	0	0	0	0	0	0	0	0	0	0	0	0	0	0	0	0	0	0	0	0	0	0	0	0	0	0	0	0	0	0.144300144300144	0	0	0	0	0	0	0	0	0	0	0	0	0	0	0	0	0	0	0
1403	0	0	0	0	0	0	0	0	0	0	0	0	0	0	0	0	0	0	0	0	0	0	0	0	0	0	0	0	0	0	0	0	0	0	0	0	0	0	0	0	0	0	0	0	0	0	0	0	0
1404	0	-0.05271447254107	-0.0128024580719498	0	0	0	0	-0.0384073742158494	0	0	0.0835934391229066	0	0	0	0	0.985044760964992	0	-0.00376420381700698	0	0.113717482394277	0	-0.0384073742158494	0	0	0	-0.0128024580719498	-0.0256049161438996	0	0	-0.0256049161438996	0.0406669377795852	0	0.0301240432713711	-0.0256049161438996	0	-0.088862283193184	-0.0128024580719498	0	-0.0233453525801639	0	0	0	0	0	0	0	0	0	0
1405	0	0	0	0	0	0	0	0	0	0	0	0	0	0	0	0	0	0	0	0	0	-0.0308975706659667	0	-0.0324499729583559	0	0	0	-0.0216333153055706	0	0	0	0	0	0	0	0	0	-0.0108166576527853	0	0	0	0	0	0	0	0	0	0	0
1406	0	0	0	0	0	0	0	0	0	0	0	0	0	0	0	0	0	0	0.0222617987533393	0	0	0	0	0	0	0	0	0	0	0	0	0	0	0	0	0	0	0	0	0	0	0	0	0	0	0	0	0	0
1407	0	0	0	0	0	0	0	0	0	0	0	0	0	0	0	0	0	0	-0.00629207827345372	0	-0.0251683130938149	0	0	0	0	0	0	0	0	0	0	0	0.0420521446593776	0	-0.00629207827345372	0	0	0	0	0	0	0	0	0	0	0	0	0	0
1408	0	0	0	0	0	0	0	0	0	0	0	0	0	0	0	0	0	0.0265604249667995	0	0	0	0	0	0	0	0	0	0	0	0	0	0	0	0	0	0	0	0	0	0	0	0	0	0	0	0	0	0	0
1409	-0.0797766254487435	-0.0398883127243718	0	-0.0634535834794669	0	0	-0.0398883127243718	-0.19490115703013	0	-0.0915592608262909	-0.0797766254487435	0	0	-0.314566095203246	-0.159553250897487	-0.450554075345637	0	0	-0.119664938173115	0	-0.199441563621859	-0.155012844305759	-0.462336710723185	-1.58645169579142	-1.71065704055626	-0.171335886275035	0	-0.0398883127243718	0	-0.115124531581387	0	-0.298243053233969	0	0	0	-0.967263556364835	0	0	0	0	0.0281056773468241	0	0	-0.661778274345044	0	-0.0398883127243718	0	-0.638213003589948	0
1410	0	0	0	0	0	0	0	0	0	0	0	0	0	0	0	0	0	0	0	0	0	0	0	0	0	0	0	0	0	0	0	0	0	0	0	0	0	0	0	0	0	0	0	0	0	0	0	0	0
1411	0	0	0	0	0	0	0	0.104712041884817	-0.0934288383681096	0	0	0.0523560209424084	-0.0311429461227032	0	0	0	0	0	0	0	0	0	0	0	0	0	0	0	0	0	0	0	0	0	0	0	0	0	0	0	0	0	0	0	0	0	0	0	0
1412	0	0	0	0	0	0	0	0	0	0	0	0	0	0	0	0	0	0	0	0	0	0	0	0	0	0	0	0	0	0	0	0	0	0	0	0	0	0	0	0	0	0	0	0	0	0	0	0	0
1413	-0.00171839021204935	0	0	-0.0034367804240987	-0.00171839021204935	0	0	0.00614137443959958	0	-0.00171839021204935	0	-0.00171839021204935	0	0	0	0	0	-0.00171839021204935	0	0	-0.00171839021204935	0	0	0	0.00614137443959958	-0.00171839021204935	0	0	0	0	-0.00171839021204935	0	0	0	0	-0.00171839021204935	-0.00515517063614806	-0.00171839021204935	0.00270459401550088	0	0	0	0	-0.00171839021204935	0.00614137443959958	0	0	0	0
1414	2.11109266892276	0.691090271438279	0.29519796152345	0.186942315908539	0.422233902274801	0.97402417770893	-0.15273205651916	-0.0241285297580101	0.33537119514602	-0.035531949554467	0	-0.03003003003003	-0.0088829873886169	-2.56974989318899	-0.66158277007817	0.833955757190139	0.256515471459177	-0.047796004807264	0.108486172969285	0.298179448640042	-0.0750750750750751	1.7440316467952	-0.011633947150835	-1.36585920618674	1.53571176089088	0.283794541726988	0.407295729711288	-0.344085129141424	0.12343971402314	0.75699035780919	-0.182931139942399	-0.045045045045045	0.0361620576564282	-0.128372999406776	0.0361620576564282	0.159663245640728	-6.38299507286205	0.211470426414132	-0.020516934539452	-0.4022548648956	-0.0600600600600601	-0.03003003003003	-0.63298200964527	0.087339130327871	0	0	0	-0.015015015015015	-0.092841049852309
1415	0	0	0	0.0960614793467819	0	0	0	0	0	0	0	-0.02211900022119	0	0	0	0	0	-0.15483300154833	0	0	0	0	0	0	0	0	0	0	0	0	0	0	0	0	0	0	0	0	0	0	0.0960614793467819	0	0	0	0	0	0	0	0
1416	0	0.00819269211863018	0	0.0122277258304751	0.00819269211863018	0	0	0	0	0	0	0	0	0	0	0	0	0	0	0	0	0.00819269211863018	0	0	0	0.0650510381692798	0	0	0	0	-0.0041576584067853	0.0245780763558905	0.00403503371184488	0	0	-0.00843794150851102	0	0	0.0121051011355346	0	0	0	0	0	0.0327707684745207	0	0	0	0
1417	0	0	0	0	0	0	0	0	0	0	0	0	0	0	0	0	0	0	0	0	0	0	0	0	0	0	0	0	0	0	0	0	0	0	0	0	0	0	0	0	0	0	0	0	0	0	0	0	0
1418	0	0	0	0	0	0	0	0	0	0	0	0	0	0	0	0	0	0	0	0	0	0	0	0	0	0	0	-0.00446647907454554	0	0	0	0	0	0	0	0	-0.00446647907454554	0	0	0	0	0	0	0	0	0	0	0	0
1419	0	0	0	0	0	0	0	0	0	0.00458442213359006	0	0	0	0	0	0	0	0	-0.000572301740369592	0	0	0	0	0	0	0	0	0	0	0	0	0	0	0	0.00458442213359006	0	0	0	0	0	0	0	0	0	0	0	0	0	0
1420	0	0	0	0	0	0	0	0	0	0	0	0	0	0	0	0	0	0	0	0	0	0	0	0	0	0	0	0	0	0	0	0	0	0	0	0	0	0	0	-0.00198878326240006	-0.00795513304960025	0	0	-0.00397756652480013	0	0	0	0	-0.00084968994274665
1421	0	0	0	0	0	0	0	0	0	0	0	0	0	0	0	0	0	0	0	0	0	0	0	0	0	0	0	0	0	0	0	0	0	0	0	0	0	0	0	0	0	0	0	0	0	0	0	0	0
1422	0	0	0	0	0	0	0	0	0	0	0	0	-0.0424929178470255	0	0	0	0	0	0	0	0	0	0	0	0	0	0	0	0	0	0	0	0	0	0	0	0	0	0	0	0	0	0	0	0	0	0	0	0
1423	0	0	0	0	0	0	0	0	0	0	0	0	0	0	0	0	0	0	0.104675505931612	0	0	0	0	0	0	0	0	0	0	0	0	0	0	0	0	0	0	0	0	0	0	0	0	0	0	0	0	0	0
1424	0.156086207810552	0	0	0.449640287769784	0.198474450769785	-0.0950796291894462	0	0.0186183356618722	0	-0.0237699072973615	-0.0475398145947231	0	-0.0237699072973615	-0.0950796291894462	-0.0475398145947231	0	-0.0713097218920846	-0.0475398145947231	-0.0237699072973615	-0.356548609460423	-0.166389351081531	0.122013157242212	0.307020843985615	-0.0289214789328512	0.156086207810552	-0.0713097218920846	0.539568345323741	0.061006578621106	0.26978417266187	0.156086207810552	0.0423882429592337	-0.0713097218920846	0	0.425870380472422	0	0.246014265364508	0	0	-0.0237699072973615	0	0	0.0661581502565953	0	-0.0237699072973615	0	0.0899280575539568	0.132316300513191	0.0186183356618722	-0.522937960541954
1425	0.56960053755286	0.0737178075802131	0.062545971696928	0	0	0	0	-0.048030739673391	-1.41972016589769	0.169779286926995	-0.048030739673391	-3.10079605446637	-0.144092219020173	0.254668930390492	0	0	-0.144092219020173	0	-0.332871781573484	-0.240153698366955	0	0.169779286926995	-0.720461095100865	0	0	-0.0111718358832845	0	0	0	0	0	0	-0.107233315230067	0	0	0.365245641760812	0	0	0	0	-0.288184438040346	0.169779286926995	0	0	0	0	0	0	0
1426	0	0	0	0	0	0	0	-0.0249045326249377	0	0	0	0	0	0	0	0	0	0	0	0	0	0	0	0	0	0	0	0	0	0	0	0	0	0	0	0	0	0	0	0	0	0	-0.00830151087497925	0	0	0	0	0	0
1427	0	-0.0109783039093269	0	0	-0.0054875696104851	0	0	0.00068673737339981	0.00960799385088393	0	-0.00823451910408432	0	0.00480399692544197	0	0	0	0	0	-0.0226433451920535	0	0	0	0	0	0	0	0	0	0	0	-0.00411725955204216	0	0	0.00549073429884177	0	0	0	0	0.00480399692544197	0	0	0	0	0	0	0	0	0	0
1428	0	0	0	0	0	0	0	0	0	0	0	0	0	-0.0373831775700935	0	0	0	0	0	0	0	0	0	0	0	0	0	-0.0373831775700935	0	0	0	0	0	0	0	0	0	0	0	0	0	0	0	0	0	0	0	0	0
1429	0	0	0	0	0	0	0	0	0	0	0	0	0	0	0	0	0	0	0	0	0	0	0	0	0	0	0	0	0	0	0	0	0	0	0	0	0	0	0.0951701165833928	0	0	0	0.0713775874375446	0	0	0	0	0	0
1430	0	0	0	0	0	0	0	0	0	0	0	0	0	0	0	0	0	0	0	0	0	0	0	0	0	0	0	0	0	0	0	0	0	0	0	0	0	0	0	0	0	0	0	0	0	0	0	0	0
1431	0	0	0	0	0	0	0	0	0	0	0	0	0	0	0	0	0	0	0	0	0	0	0	0	0	0	0	0	0	0	0	0	0	0	0	0	0	0	0	0	0	0	0	0	0	0	0	0	0
1432	0	0	0	0	0	0.0679347826086956	0	0	0.0679347826086956	0	0	0	0	0	0	0.205393562021806	0	0	0	0	0	-0.0161890885543144	0	0	0	-0.0161890885543144	0	0	0	0	0.0679347826086956	0	0	0	0.0339673913043478	0	0	0	0	0	-0.314246485911974	0	-0.0323781771086288	0	0	0	0	0	0
1433	0	0	0	0	0	0	0	0	0	0	0	0	0	0	0	0	0	0	0	0	0	0	0	0	0	0	0	0	0	0	0	0	0	0	0	0	0	0	0	0	0	0	0	0	0	0	0	0	0
1434	0	0	0	0	0	0	0	0	0	0	0	0	0	0	0	0	0	0	0	0	0	0	-0.00397180021844901	0	0	0	-0.00198590010922451	0	0	0	0	0	0	0	0	0	0	0	0.00608013619505077	0	0	0	0	0	0	0	0	0	0
1435	0	0	0	0	0	0	0	0	0	0	0	0	0	0.149700598802395	0	-0.0619578686493185	0	0	0	0	0	0	0	0	-0.0619578686493185	0	0	0	0	0	0	0.29940119760479	0	0	-0.0619578686493185	0	-0.0619578686493185	0	0	0	0	-0.123915737298637	0.149700598802395	0	0	0	-0.185873605947955	0	0
1436	-0.0337495781302734	0.0704225352112676	0	-0.0674991562605467	0	-0.0337495781302734	0	0	0	-0.0337495781302734	0	0	-0.134998312521093	0	0	-0.0337495781302734	0	-0.0337495781302734	0	0	0	0	0	0	0	-0.0337495781302734	0	0	0	0	0	0.0704225352112676	-0.0337495781302734	-0.134998312521093	0	-0.10124873439082	-0.0674991562605467	-0.0337495781302734	0	0	0.140845070422535	-0.0337495781302734	0	0	0	0	-0.0337495781302734	0	0
1437	0	0	0	0	0	0	0	0	0	0	0	0	0	0	0	0	0	0	0	0	0	0	0	0	0	0	0	0	0	0	0	0	0	0	0	0	0	0	0	0	0	0	0	0	0	0	0	0	0
1438	0	0	0	0	0	0	0	0	0	0	0	0	0	0	0	0	0	0	0	0	0	0	0	0	0	0	0	0	0	0	0	0	0	0	0	0	0	0	0	0	0	0	0	0	0	0	0	0	0
1439	0	0	0	0	0	0	0	0	0	0	0	0	0	0	0	0	0	0	0	0	0	0	0	0	0	0	0	0	0	0	0	0	0	0	0	0	0	0.0328731097961867	0	0	0	0	0	0	0	0	0	0	0
1440	0.0033763023046225	0.0284203944750753	0.0202758924590635	0.0113681577900301	-0.0193600132754377	-0.0165942970932323	0.000763232653021501	-0.0182914875612076	0.0116734508512387	0.032865222493928	-0.0078392089548032	-0.03595431036867	-0.0158310644402108	-0.0052261393032022	-0.0187494271530205	-0.0152204783177936	-0.0238229199256184	0.01856062335976	-0.0729952250828983	0.004597474549457	-0.0371935612448324	-0.0951209545405413	0.0042921814882483	-0.0376515008366453	0.0172048832156494	-0.0110628647288215	0.00568407889501506	0.00875508813842905	-0.00276571618220538	-0.00261306965160109	-0.0165942970932323	-0.0193600132754377	-0.0276571618220538	-0.00829714854661615	-0.0165942970932323	-0.016441650562628	-0.0021551300597882	-0.0106049251370086	-0.0192073667448333	0.0089077346690333	-0.00261306965160109	-0.0110628647288215	0	0.0036815953658312	-0.0248914456398484	-0.00829714854661615	-0.0138285809110269	0.0065999580786408	0.0036815953658312
1441	0	0	0	0	0	0	0	0	0	0	0	0	0	0	0	0	0	0	0	0	0	0	0	0	0	0	0	0	0	0	0	0	0	0	0	0	0	0	0	0	0	0	0	0	0	0	0	0	0
1442	0	0	0	0	0	0	-0.014801657785672	0	0	0	0	0	0	0	0	0	0	0	0	0	0	0	0	0	0	0	0	0	0	0	0	0	0	0	0	0	0	0	0	0	0	0	0	0	0	0	0	0	0
1443	0.00267283914244989	0	0	0	0	0.0102782256990118	0	0	0	0.016134061813561	0.00493254741411202	0	0	-0.00112985413583106	0	-0.0123188570176094	0	0	0	0	0	0	0	0.00246627370705601	0	0	0	0	0	0	0	0	0	0	0	0	0	0	0	0	0	0	0	0	0	0	0	0	0
1444	0	0	0	0	0	0	0	0	0	0	0	0	0	0	0	0	0	0	0	0	0	0	0	0	0	0	0	0	0	0	0.0300120048019208	0	0	0	0	0	0	0	0.0300120048019208	0	0	0	0	0	0	0	0	0	0
1445	0	0	0	0	-0.0125667609173735	0	-0.0388136380338213	0	-0.0536071095145959	0	0	-0.0273602323981483	0	-0.0325302575751345	0	0.0040566698952855	0	-0.0273602323981483	0.0469269778243923	0	0	0	-0.0358703234202362	0	0	0	0	-0.00628338045868677	0	0	0	0	0	0	0	0	0	0.0354735721887194	-0.319735799342841	-0.00628338045868677	-0.0125667609173735	-0.0536071095145959	0	0	0.0687204338140374	-0.00628338045868677	0.0177367860943597	0.0018299593318843	-0.0879673264216148
1446	0.00952118024927441	0	0	-0.0077435341489856	0	0	0	0	0.228690130697389	-0.0077435341489856	0	0	0	0	-0.0077435341489856	0	0.0217391304347826	0	0	0	0	0.0217391304347826	-0.0077435341489856	-0.0154870682979712	0.0869565217391304	0	0	0	0	0	-0.0309741365959424	0.0217391304347826	0	-0.0154870682979712	-0.0077435341489856	0	-0.171563049201742	0	0	-0.0077435341489856	-0.0542047390428992	-1.84089730727017	-0.077435341489856	0	0	0	0	0	-0.0154870682979712
1447	0	0	0	-0.283163110697521	0	0	-0.051707379195375	0	0.128040973111396	0	0	0	0	-0.0599161174355902	0	-0.0599161174355902	0	-0.179748352306771	0	0	0	-0.0599161174355902	0	0	0	0	0	0	0	0	0	0	0	0	0	-0.179748352306771	0	0	0.128040973111396	0	0	0	0	0	0	0	0	0	-0.11983223487118
1448	0	-0.00517794884186544	0	0	0	0	0.0086591332207646	0	0	0	0	0.0043295666103823	-0.00172598294728848	0	0	0	0	0	0	0	0	0	-0.00517794884186544	-0.00345196589457696	0	-0.00172598294728848	0	-0.00172598294728848	0	0	-0.00172598294728848	0	0	-0.00690393178915392	0.0043295666103823	0	-0.00172598294728848	0	0	0	0	-0.00172598294728848	0	0	0	0	0	0	0
1449	0.00776747288633736	0	0	0	0	0	0	-0.00294031167303734	0	0	0	0	0	0	0.00535389227968733	0	0	-0.00052673106638735	0	0	0	0	0	0	0.0374772459578113	0	0.0125946340996373	0	0	0.0155349457726746	0	0	0.080961366999666	0.0131213651660247	-0.0069340854788494	0	0	0	0	-0.0624933509254583	-0.0240492244506861	0	0	-0.171504957553127	0	0	-0.00882093501911203	0	0
1450	0	0	0.0096024582293067	0	0	0	-0.00522739153162572	0.0096024582293067	0	0	0	0	0	0	0	0	0	0	0	0	0	0	0	0	0	0	0	0	0	0	0	0	0	0	0	0	0	0	0	0	0	0	0	0.0096024582293067	0	0	0	0	0
1451	0	0	0	0	0	0	0	0	0	0	0	0	0	0	0	0	0	0	0	0	0	0.0090225236187439	0	0	0	0	0	0	0	0	0	0	0	0	0	0	-0.0150738619234248	0	0	-0.0301477238468496	0	0	0	0	0	0	0	0	0
1452	0	0	0	0	0	0	0	0	0	0.112359550561798	0	0	0	0	0	0	0.224719101123595	0	0	0	0	0	-0.0769230769230769	0	0	-0.0769230769230769	0	0	0	0	0	0	0	0	0	0	0	0	0	0	0	0	0	0	0	0	0	0	0
1453	-0.0294117647058824	-0.00735294117647059	0	0	0	0	0	0	0	0	0	0	0	0	0	0.0415052573325955	0	0	0	0	0	0	0	0	0	0	0	0	0	0.0276701715550636	0	0	0	0.0138350857775318	0	0	-0.00735294117647059	0	0	0	0.00648214460106121	0	0.0138350857775318	0	0.0553403431101273	0	0	0	0
1454	0.0749344323716748	0	0	0	0	0	0	0	0	0	0	0	0	0	0	0	0	0	0	0	0	0	0	0	0	0	0	0	0	0	0	0	0	0	0	0	0	0	0	0	0	0	0	0	0	0	0	0	0
1455	0	0	0	0	-0.00368320733694902	0.00412248638968475	0	-0.000920801834237254	0	0	0	0	0	0	0	0	0	0	0	0	-0.00184160366847451	0	0	0	0	0	0	0	0	0	0	0	0	0	0	0	0	0	0	0	0	0	0	0	0	0	0	0	0
1456	0	0	0	0	0	0	0	0	0	0	0	0	0	0.0183094293561184	0	0	0	0	0	0	0	0	0	0.00305157155935307	0	0	-0.00410399523936552	0	0	0.00305157155935307	0	0	0	0	0	-0.00410399523936552	0	0	0	0	0	0	0	0	0	0	0	0	0
1457	0	0	0	0	0	0	0	0	0	0	0	0	0	0	0	0	0	0	0	0	0	0	0	0	0	0	0	0	0	0	0	0	0	0	0	0	0	0	0	0	0	0	0	0	0	0	0	0	0
1458	0	0	0	0	0	0	0	0	0	0	0	0	0	0.0246847073039908	0	0.0318572793883402	-0.001677179964929	-0.00717257208434945	0	0	0.00875606760982065	0	0	0	0	0	0	0.0955718381650207	0	0	0.040613346998161	0	-0.0414519369806255	0	0	0.157609216976772	0	0	0	0	0	0.00875606760982065	0	0	0	0.0318572793883402	0	0	0
1459	0	0	0	0	0	0	0	0	0	0	0	0	0	0	0	0	0	0	0	0	0	0	0	0	0	0	0	0	0	0	0	0	0	0	0	0	0	0	0	0	0	0	0	0	0	0	0	0	0
1460	0	0	0	0	0	0	0	0	0	0	0	0	0	0	0	0	0	0	0	0	0	0	0	0	0	0	0	0	0	0	0	0	0	0	0	0	0	0	0	0	0	0	0	-0.0163786749651953	0	0	0	0	0
1461	0	0.0190200950545213	0	0.0832177531206657	-0.0174383119714012	0	0	0	0	0	0.0832177531206657	0	0	0	0.0776621633012059	0	-0.0261574679571018	0	-0.0174383119714012	0	0.0190200950545213	0	0	0	0	0.0190200950545213	0	0	0	0	0	0	0	0	0	0	0	0	0	0	0	0	0	0	0	0	0	0	0
1462	0	0	0	0	0	0	0	0	0	0	0	0	0	0	0	0.14903129657228	0	0	0	0	0	0	0	0	0	0	0	0	0	0	0	0.03725782414307	0	0	0	0	0	0	0	0	0	0	0	0	0	0	-0.114600045840018	0	-0.114600045840018
1463	-0.00599304806424548	-0.0239721922569819	-0.011986096128491	0	-0.0087030503086008	-0.011986096128491	0.0496117766961287	-0.011986096128491	-0.0239721922569819	-0.011986096128491	0	-0.00599304806424548	0.013080444735121	0	-0.00599304806424548	0	0.013080444735121	0.026160889470242	0	-0.00599304806424548	0.013080444735121	0	0.0021886972132601	0	0	0.0724896203464805	0	0	-0.0239721922569819	0	-0.011986096128491	0.013080444735121	-0.00599304806424548	-0.011986096128491	-0.0108917475218609	0.052321778940484	-0.00599304806424548	0	0.026160889470242	-0.00599304806424548	0.013080444735121	0	-0.0179791441927364	0	-0.0239721922569819	0	0.014174793341751	0	-0.00599304806424548
1464	0	0	0	0	0	0	0	0	0	0	0	-0.0154918667699458	0	0	0	0	0	0	-0.0154918667699458	0	0	-0.0154918667699458	0	0	0	0	0	0	0	0	0	0	0	0	0	0	0	0	0	0	0	0	0	0	0	0	-0.0154918667699458	0	0
1465	0	0	0	0	0	0	0	-0.0101317122593718	0	0	0	0	0	0	0	0	0	0	0	0	0	0	0	0.0104286161226405	0	0	0	0	0	0	0	0	0	0	0	0	0	0	0	0	0	0	0	0	0	0	0	0	0
1466	-0.0384837406195882	0.0477783086478739	-0.0384837406195882	0	-0.0192418703097941	-0.0384837406195882	-0.0577256109293823	0.0477783086478739	-0.0962093515489706	0	0	0.104851185324034	-0.0962093515489706	-0.0192418703097941	0	0	0.143334925943622	0.0477783086478739	-0.0384837406195882	0	0.0477783086478739	-0.0962093515489706	-0.0577256109293823	0.0285364383380798	-0.0769674812391764	-0.0577256109293823	-0.0384837406195882	0.0477783086478739	-0.0192418703097941	-0.0384837406195882	-0.0484310429010967	0.104851185324034	0	0.0477783086478739	-0.0577256109293823	-0.0192418703097941	0	0	0	0.0092945680282857	-0.0192418703097941	0	-0.0384837406195882	0	0	-0.0192418703097941	0	0	0
1467	0	0	0	0	0	0	0	0	0	0	0	0	0	0	0	0	0	0	0	0	0	0	0	0	0	0	0	0	0	0	0	0	0	0	0	0	0	0	0	0	0	0	0	0	0	0	0	0	0
1468	0.0070315693116537	0	0	0	0	-0.0336398295581969	0.0435212609737592	0.0351578465582688	0	0	0	0	-0.0224265530387979	0	-0.0938879193629373	0.0098814314155623	0	0	0	0	0	0	0	0	0	0	0	0	0	0	0	0	0.0182448458310527	0	0	0	0	0	0	0	0	0	0	0	0	0	0	0	0
1469	0	0	0	0	0	0	0	0	0	0	0	0	0	0	0	0	0	0	0	0	0	0	0	-0.0870322019147084	0	0	0	0	0	0	0	0	0	0	0	0	0	0	0	0	0	0	0	0	0	0	0	0	0
1470	0	0	0	0	0	0	0	0	0	0	0	0	0	0	0	0	0	0	0	0	0	0	0	0	0	0	0	0	0	0	0	0	0	0	0	0	0	0	0	0	0	0	0	0	0	0	0	0	0
1471	0	0	0	0	0	0	0	0	0	0	0	0	0	0	0	0	0	0	0	0	0	0	0	0	0	0	0	0	0	0	0	0	0	0	0	0	0	0	0	0	0	0	0	0	0	0	0	0	0
1472	0	0	0	0	0	0	0	0	0	0	0	0	0	0	0	0	0	0	0	0	0	0	0	0	0	0	0	0	0	0	0	0	0	0	0	0	0	0	0	0	0	0	0	0	0	0	0	0	0
1473	0	0	0	0	0	0	0	0	0	0	0	0	0	0	0	0	0	0	0	0	0	0	0	0	0	0	0	0	0	0	0	0	0	0	0	0	0	0	0	0	0	0	0	0	0	0	0	0	0
1474	0	0	0	0	0	0	0	0	0	0	0	0	0	0	0	0	0	0	0	0	0	0	0	0	0	0	0	0	0	0	0	0	0	0	0	0	0	0	0	0	0	0	0	0	0	0	0	0	0
1475	0	0	0	0	0	0	0	0	0.0279759406910057	0	0	0	-0.0142247510668563	0	0	0	-0.00711237553342817	0	0	0	0	0	0	0	0	0	0	0	0	0	0	0	0	0	0	0	0	0	0	0	0	0	0	0	0	0	0	0	0
1476	0	0	0	0	0	0	0	0	0	0	0	0	0	0	0	0	0	0	0	0	0	0	0	0	0	0	0	0	0	0	0	0	0	0	0	0	0	0	0	0	0	0	0	0	0	0	0	0	0
1477	0	0	0	0	0.017307026652821	0	-0.0212426978226235	0	0	0	0	0	-0.0106213489113117	0	0.0239927043943304	0	0	0	-0.0531067445565587	-0.0212426978226235	0.0346140533056421	0.017307026652821	-0.0212426978226235	0	0	0	-0.0106213489113117	0	0	0	0.017307026652821	0	0	0	0	0	0	0	0.0692281066112842	0	0	0.017307026652821	0	0	0	0	0	0	0
1478	0	0	0	0	0	0	0	0	0	0	0	0	0	0	0	0	0	0	0	0	0	0	0	0	0	0	0	0	0	0	0	0	0	0	0	0	0	0	0	0	0	0	0	0	0	0	0	0	0
1479	0	0	0	0	0	0	0	0	0	0	0	0	0	0	0	0	0	0	0	0	0	0	0	0	0	0	0	0	0	0	0	0	0	0	0	0	0	0	0	-0.0267952840300107	0	0	0	0	0	0	0	0	0
1480	0	0	0	0	0	0	0	0	0	0	0	0	0	0	0	0	0	0	0	0	0	0	0	0	0	0	0	0	0	0.0206619668061886	0	0	0	-0.0713521227256511	0	0	0	0	0	0	0	0	0	0	0	0	0	0	0
1481	0	0	0	0	0	0	0	0	0	0	0	0	0	0	0	0	0	0	0	0	0	0	0	0	0	0	0	0	0	0	0	0	0	0	0	0	0	0	0	0	0	0	0	0	0	0	0	0	0.0536442012448834
1482	0	0	0	0	0	0	0	0	0	0	0	0	0	0	0	0	0	0	0	0	0	0	0	0	0	0	0	0	0	0	0	0	0	0	0	0	0	0	0	0	0	0	0	0	0	0	0	0	0
1483	0	0	0	0	0	-0.0171732783788425	0	0	0	0	0	0	0.0650618087182824	0	0	0	0	0	0	0	0	0	0	0	0	0	0	0	0	0	0	0	0	0	0	0	0	0	0	0	0	0	0	0	0	0	0	0	0
1484	0	0	0	0	0	0	0	0	0	0	0	0	0	0	0	0	0	0	0	0	0	0	0	0	0	0	0	0	0	0	0	0	0	0	0	0	-0.00728544368352033	0	0	0	0	0	0	0	0	0	0	0	0
1485	-0.0170125893160939	0	0	0	0	0	0	0	0	0	0	0	0	0	0	0	0	0	0	0	0	0	0	0	0	0.130975769482646	-0.0365876511552401	0	0	0	-0.171407129422466	0	0	-0.0170125893160939	-0.0510377679482817	0	0	-0.0170125893160939	0	0	0	0	0	-0.170125893160939	-0.0340251786321878	0	0	0	0
1486	0	0	0	0	0	0	0	0	0	0	0	0	0	0	0	0	0	0	0	0	0	0	0.104058272632674	0	0	0.416233090530697	0	0	0	0	0.104058272632674	0	0	-0.0560538116591928	0	0	0	0	0	0	0	0	0	0	0	0	0	0	0.096008921946963
1487	0	-0.00301340967304505	0	0	0	-0.00301340967304505	0	0	0	0	0	0	0	0	0	0	0	0	0	-0.00301340967304505	0	0	-0.0060268193460901	0	0	0	0	0	0	0	0	0	0	0	0	0	0	0	0	-0.00301340967304505	0	0	0	0	0	0	0	0	0
1488	0	0	0	0	0	0	0	0	0	0	0.0824402308326463	0	0	0	0	0	0	0	0	0	0	-0.0211954217888936	0	-0.0635862653666808	0.247320692497939	-0.0423908435777872	0	0	0	0.0412201154163232	-0.0423908435777872	0	0	0	0.0412201154163232	0	0	0	-0.0211954217888936	0	0	0	0	0.0412201154163232	0	0	0	0	0
1489	0.393120393120393	0.023642853831533	2.41435260303185	0.698623151453339	-0.0528487320940149	-2.5566733113903	0.393120393120393	-0.0764915859255482	0.245700245700246	0.023179268462287	0.0982800982800983	0.662463492652172	-0.21649436743776	0.0491400491400491	0.24199156274628	-0.23967363590005	0.0982800982800983	-0.184043391590562	1.36804042464423	0.365768856334894	0.147420147420147	0.0491400491400491	0.0709285614945988	0.0727829029715822	1.84970562329053	-0.0273515367854991	1.17797042325344	0.171063001251681	0.245700245700246	1.40976310787632	0.0491400491400491	-0.0254971953085161	0.824254786518937	-0.0509943906170321	0	0.0727829029715822	0	0	-0.0528487320940149	0.069074220017617	0	0	0	0.22020305039173	0	0	0	0	0.387557368689445
1490	-0.0183016105417277	0	0	-0.0183016105417277	0	0	0	0	0	0	0	0	0	0	0	0	0	0	0.0482510477116323	0	0	0	0	0.107038488212874	0	0	0.103155879336815	0	0	0	0	0	0	0	0	0	0.502471828856972	0	-0.0366032210834553	-0.178570370063011	-0.0732064421669107	0.0404858299595142	0	-0.126999839953527	0	0	0	0	0
1491	0	0	0	0	0	0	0	0	0	0	0	0	0	0	0	0	0	0	0	0	0	0	0	0	0	0	0	0	0	0	0	0	0	0	0	0	0	0	0	0	0	0	0	0	0	0	0	0	0
1492	0	0	0	0	0	0	0	0	0	0	0	0	0	0	0	0	0	0	0	0	0	0	-0.0351679268507121	0	0	0	0	0	0.106837606837607	0	0	0	0	0.0356125356125356	0	0	0	0	0	0	0	0	0	0	0	0	0	0	0
1493	0	0	0	0	0	0	0	0	0	0	0	0	0	0	0	0	0	0	0	0	0	0	0	0	0.0802568218298555	0	0	0.126102081374783	0	0	0.0802568218298555	0	0	0.0916905190898555	0	-0.0344115622849277	0.802568218298555	0	0.0458452595449278	0	0	0	0	0	0	0.0802568218298555	1.39855659238262	-0.0688231245698555	0
1494	0	-0.030362835888872	0	0	0	0	0	0	0.0679347826086956	0	0	0	0	0	0	0	0	0	0	0	0	0	0	-0.015181417944436	0	0	0	0	0	0	0	0	0	-0.015181417944436	0	0	0	0	0	0	0	0	-0.015181417944436	0	0	0	0	0	0
1495	0	0	0	0	0	0	0	0	0	0	0	0	0	0	0	0	0	0	0	0	0	0	0	0	0	0	0	0	0	0	0	0	0	0	0	0	0	0	0	0	0	0	0.0115801053789589	0	0	0.0115801053789589	0	0	0
1496	0	-0.0121545301515325	0	0	0	0	0	0	0	0	0	0	0	0	0	0	0	0	0	0	0	0	0	0	0	0	0	0	0	0	0	0	0	0	0	0	0	0	0	0	0	0	0	0	0	0	0	0	0
1497	0	0	0	0	0	0	0	0	0	0	0	0	0	0	0	0	0	0	0	0	0	0	0	0	0	0	0	0	0	0	0	0	0	0	0	0	0	0	0	0	0	0	0	0	0	0	0	0	0
1498	0	0	0	0	0	0	0	0	0	0	0	0	0	0	0.0575153374233129	0.146186194025901	0	0	0	0	0	0	0	0.266012569807766	-0.0143760782058654	0	0	0	0	0	0.0263708428438882	0	0	0	0.0766871165644172	-0.00718803910293272	0	0	0.028763181011582	-0.0215641173087982	0	0.0239674800763432	0	0	0	0	0	0	0.0191717791411043
1499	0	0	0	0	0	0	0	0	0	0	0	0	0	0	0	0	0	0	0	-0.0228284442415249	0	0	0	0	0	0	-0.0114142221207625	0	0	0	0	0	0	0	0	0	0	0	0	0	0	0	0	0	0	0	0	0	0
1500	0	0	0	0	0	0	0	0	0	0	0	0	0	0	0	0	0	0	0	0	0	0	0	0	0	0	0	0	0.00861474844934528	0	0	-0.00587941323455919	0	0	0	0	0	0	0	0	0	0	0	0	0	0	0	0	-0.0029397066172796
1501	0	0.106935403854493	-0.141506301538958	-0.0433275563258232	0.0751314800901578	-0.12998266897747	-0.141506301538958	0.257198364034808	-0.034570897684466	-0.389948006932409	0.040560582405692	0.234151098911831	-0.239685046752093	-0.519930675909879	-0.736568457538995	0.254431390114676	0.0751314800901578	-0.389948006932409	-0.121226010336113	0.309282579001988	0.127215695057338	-0.167320540582068	-0.251208679313582	-0.12998266897747	-0.433275563258232	-0.109702377774623	-0.0548511888873122	-0.727811798897638	0.072364506170026	-0.167320540582068	0.190823542586008	-0.901122024200927	-0.372434689649694	-0.0115236325614887	-0.259965337954939	-0.283012603077916	-0.216637781629116	-0.228161414190605	0.190823542586008	-0.661436977448837	-0.14427327545909	0.341086502766323	-0.542977941032856	0.008756658641357	0.300525920360631	-0.0981787452131352	-0.346620450606586	0.150262960180316	0.277478655237654
1502	0	0	0	0	0	0	0	0	0	0	0	0	0	0	0	0	0	0	0	0	0	0	0	0	0	0	0	0	0	0	0	0	0	0	0	0	0	0	0	0	0	0	0	0	0	0	0	0	0
1503	0	0	0	0	0	0	0	0.00785916378497328	-0.00608902149424587	0	0	0	0	0	0	0	0	0	0	0	0	0	0	0	0	0	0	0	0	0	0	0	0	0	0	0	0	0	0	0	0	0	0	0	0	0	0	0	0
1504	0	0	0	0	0	0	0	0	0	0	0	0	0	0	0	0	0	0	0	0	0	0	0	0	0	0	0	0	0	0	0	0	0	0	0	0	0	0	0	0	0	0	0	0	0	0	0	0	0
1505	0	0	0	0	0	0	0	0	0	0	0	0	0	0	0	0	0	0	0	0	0	0	0	0	0	0	0	0	0	0	0	0	0	0	0	0	0	0	0	0	0	0	0	0	0	0	0	0	0
1506	0	0	0	0	0.0379218809252939	0	-0.0136948781155848	0	-0.0136948781155848	0.0758437618505878	0	0	0	0	0	0	0	0	0	0	0	0	0	0	0	0	0	0	0	0	0	0	0	0	0	0	0	0	0	0	0	0	0	0	0	0	0	0	0
1507	0	0	0	0	0	0	0	0	0	0	0	0	0	0	0	0	0	0	0	0	0	0	0	0	0	0	0	0	0	0	0	0	0	0	0	0	0	0	0	0	0	0	0	0	0	0	0	0	0
1508	0	0	0	0	0	0	0	0	0	0	0	0	0	-0.0135593220338983	-0.0271186440677966	0	0	0	0	0	0	0	0	0.067001675041876	0	0	-0.0271186440677966	0	0	0	0	0	0	0	0	0	0	0	0	-0.0135593220338983	0	0	0	-0.0135593220338983	0	0	0	0	-0.0135593220338983
1509	0	0	0	0	0	0	0	0	0	0	0	0	0	0	0	0	0	0	0	0	0	0	0	0	0	0	0	0	0	0	0	0	0	0	0	0	0	0	-0.0148536911422488	0	0	0	0	0	0	0	0	-0.00495123038074962	0
1510	0	0	0	0	0	0	0	0	0	0	0	0	0	0	0	0	0	0	0	0	0	0	0	0	0	0	0	0	0	0	0	0	0	0	0	0	0	0	0	0	0	0	0	0	0	0	0	0	0
1511	0	0	0	0	0.0119774823332136	0	0	0	0	0	0	0	0	0	0	0	0	0	0	0	0	-0.0101214574898785	0	0	0	0	0	0	0	0	0	0	0	0	0	0	0	0	0	0	0	0	0	0	0	0	0	0	0
1512	0	0	0	0	0	-0.0453309156844968	0	0	0	0	0	0	0	0	-0.317316409791478	0	0	0	-0.0453309156844968	0	0	0	0	0	0	0	0	0	0	0	0	0	0	0	0	0	0	-0.0453309156844968	0	0	0	0	0	0	0	0	0	0	0
1513	0	0	0	0	0	0	0	0	-0.0125580811252041	0	0	0	0	-0.0376742433756122	0	0	0	-0.0125580811252041	0	0	0	0	0	0	0	0	0	0	0	0	0	0	0	0	0	0	0	0	0	0	0	0	0	0	0	0	0	0	0
1514	0	0	0	0	0	0	0	0	0	0	0	0	0	0	0	0	0	0	0	0	0	0	0	0	0	0	0	0	-0.0585994726047466	0	0	0	0	0	0	0	0	0	0	0	0	0	0	0	0	0	0	0	0
1515	0	0	-0.114711690723271	0	0	-0.00860659264996988	0	0	-0.0372523568735417	0	0.0229937916762474	0.0605034162077551	0	0	0	-0.0172131852999398	0	0	0	0	0	0	0	0	-0.0344263705998795	-0.00860659264996988	0	0	0	0	0	0	0	0	-0.0172131852999398	0	0	-0.0172131852999398	0	0	0	0	0.0517681897288024	0	0	0	0	0	0
1516	0	0	0	0	0	0	0	0	0	0	0	0	0	0	0	0	0	0	0	0	0	0	0	0	0	0	0	0	0	0	0	0	0	0	0	0	0	0	0	0	0	0	0	0	0	0	0	0	0
1517	0	0	0.02465483234714	0	0	0	0	0	0	0	0	0	0	0	0	0	0	0	0	0	0	0	0	0	0.02465483234714	0	0	0	0	0	0	-0.00505996053230785	0	0.02465483234714	0	0	0	0	0	0.0369822485207101	0	0	0	0	0	0	0	0	0
1518	0	0	0	0	0	0	0	0	0	0	0	0	0	0	0	0	0	0	0	0	0	0	0	0	0	0	0	0	0	0	0	0	0.0442575791104227	0	0	0	0	0	0	0	0	0	0	0	0	0	0	0	0
1519	0	-0.0487745396902817	-0.0121936349225704	0	0.0735970561177553	-0.0121936349225704	0	0	0	-0.0243872698451408	0.0183992640294388	0	0	-0.0121936349225704	0	0	0	0	-0.0243872698451408	0	-0.0121936349225704	0	0.0367985280588776	-0.0243872698451408	0	0	0.0367985280588776	0.0062056291068684	0	-0.0121936349225704	-0.0243872698451408	-0.0365809047677113	0	-0.0119760116314041	0	0	-0.0243872698451408	0	0	0.0126288815049032	0.0183992640294388	0	0	0	0	0	0	0	0
1520	0	0	0	0	0	0	0	0	0	0	0	0	0	0	0	0	0	0	0	0	0	0	0	0	0	0	0	0	0	0	0	0	0	0	0	0	0	0	0	0	0	0	0	0	0	0	0	0	0
1521	0	0	0	0	0	0	0	0	0	0	0	0	0	0	0	0	0	0	0	0	0	0	0	0	0	0	0	0	0	0	0	0	0	0	0	0	0	0	0	0	0	0	0	0	0	0	0	0	0
1522	0	0	0	0	0	0	0	0	0	0	0	0	0	0	0	0	0	0	0	0	0	0	0	0	0	0	0	0	0	0	0	0	0	0	0	0	0	0	0	0	0	0	0	0	0	0	0	0	0
1523	0	0	0	0	0	0	0	0	0	0	0	0	0	0	0	0	0	0	0	0	0	0	0	0	0	0	0	0	0	0	0	0	0	0	0	0	-0.00567134552672622	0	0	0	0	0	0	0.00639549756971092	0	0	0	0	0
1524	-0.0345901072293324	0	0	0	0	0	0	0	-0.0345901072293324	0	0	0	-0.0345901072293324	0	-0.0691802144586648	0	-0.0345901072293324	0	0	-0.0345901072293324	0	0	0	0	0	0	0	0	0	0	0	0	0	0	0	0	0	0	0	0	0	0	0	0	0.17996400719856	0	0	0	0
1525	0	0	0	0	0	0	0	0	0.0107874865156419	0	0.0542999269125952	0.684474022782563	-0.00347499739375195	-0.00694999478750391	0.499211677910551	-0.0065875004531179	-0.00347499739375195	0	0.0215749730312837	0	0	0	0	0	0	0	0	0	0	0	0	0	0	0	0	0	0	0	0	0	0	0	0	0	0	0	0	0	0
1526	0	0	-0.00770534751117275	0	0	0	0	0	0	0	-0.00770534751117275	-0.0154106950223455	0	0	-0.00770534751117275	0	0	0	0	0	-0.00770534751117275	0	0	0	0	0	0	0	0	0	0	0	0	0	0	0	0	-0.00770534751117275	0	0	0	0.0910954224550216	0	0	0	0.0455477112275108	-0.00770534751117275	0	0
1527	0	0	0	0	0	0	0	0	0	0	0	0	0	0	0	0	0	0	0	0	0	0	0	0	0	0	0	0	0	0	0	0	0	0	0	1.34955412567248	0	0	0	0.115473441108545	0.641862126046274	0.158692546956974	-0.108381502890173	0	0	0	0	0	0
1528	0	0	0	0	0	0	0	0	0	0	0	0	0	0	0	0	0	0	0	0	0	0	0	0	0	0	0	0	0	0	0	0	0	0	0	0	0	0	0	0	0	0	0	0	0	0	0	0	0
1529	0	0	0	0	0	0	0	0	0	0	0	0	0	0	0	0	0	0	0	0	0	0	0	0	0	0	0	0	0	0	0	0	0	0	0	0	0	0	0	0	0	0	0	0	0	0	0	0	0
1530	0	0	0	0	0	0	0	0	0	0	0	0	0	0	0	0.0397298371076679	-0.054786307645693	1.99542951214262	0.155908054323066	0.0509655867384871	0	0	0	0	0	0	0	0	0	0	0	0	0	0	0	0	0	0	0	0	0	0	0	0	0	0	0	0	0
1531	0	0	0	0	0	0	0	0	0	0	0	0	0	0	0	0	0	0	0	0	0	0	0	0	0	0	0	0	0	0	0	0	0	0	0	0	0	0	0	0	0	0	0	0	0	0	0	0	0
1532	0	0	0	0	0	0	0	0	0	0	0	0	0	0	0	0	0	0	0	0	0	0	0	0	0	0	0	0	0	0	0	0	0	0	0	0	0	0	0	0	0	0	0	0	0	0	-0.00492174426616793	0	0
1533	0	0	0	0	0	0	0	0	0	0	0	0	0	0	0	0	0	0	0	0	0	0	0	0	0	0	0	0	0	0	0	0	0	0	0	0	0	-0.00718236012353659	0	0	0	0	-0.00718236012353659	0	0	0	-0.0574588809882928	0	0
1534	0	0	0	0	0.0734419158113935	0	0	0	0	0.150602409638554	0	0	0	0	0	0	0	0	0	0	0	0	0	0	0	0	0	0	0	0	0	0	0	0	0	0	0	0	0	0	0	0	0	0	0	0	0	0	0
1535	0	0	0	0	0	0	0	0	0	0	0	0	0	0	0	0	0	0	0	0	0	0	0	0	0	0	0	0	0	0	0	0	0	0	0	0	0	0	0	0	0	0	0	0	0	0	0	0	0
1536	-0.0370644922164566	0	0	0.0710827996324785	0	0.0510274611240327	-0.0123548307388189	0	0	0	0	0	0	-0.0123548307388189	0	-0.0123548307388189	-0.0617741536940944	0	0	0	-0.0370644922164566	0	-0.0123548307388189	0	0	0	0	0	0	0	0	0	0	0	0	0	0	0	0	0	0	0	0	0	0	0	0	0	-0.0123548307388189
1537	0	0	-0.00576767793286423	0	0	0	0	0	0	0	0	0	0	0	0	0	0	0	0	0	-0.00576767793286423	0	0	0	0	0	0	0	0	0	0	0	0	0	0	0	0	0	0	0	0	0	0	0	0	0	0	0	0
1538	0	-0.00157212929191297	0	-0.00314425858382593	0	0	0	0	0	0.00391941679078153	0	0	0	0	0	0	0	-0.00157212929191297	0	0	0	0	-0.00631033004565364	0	0	-0.00157212929191297	0	0	0	0	0	0.0007751582069556	0	0.00626670428965009	0	0	-0.00314425858382593	-0.00157212929191297	0	-0.00079697108495737	0	0	0	-0.00157212929191297	0	0	0	0	0
1539	0	-0.026638252530634	0	0	0	0	0.0825763831544178	0	0	0	0.0292998780931498	0	0	-0.053276505061268	0	0	0	0	0	0	-0.026638252530634	0	0	0	0	0.247729149463254	0	-0.026638252530634	0	-0.053276505061268	0	0	0	0	0	0.0292998780931498	0	0.330305532617671	0	0	0	0.165152766308836	0	-0.026638252530634	0	0	0	-0.026638252530634	0
1540	0	0	0	0	0	0	0	0	0	0	0	0	0	0	0	0	0	0	0	0	0	0	0	0	0	0	0	0	0	0	0	0	0	0	0	0	0	0	0	0	0	0	0	0	0	0	0	0	0
1541	0	0	0	0	0	0	0	0	0	0	0	0	0	0	0	0	0	0	-0.0597609561752988	0	-0.0796812749003984	-0.43303061917532	-2.27592267135325	-0.0597609561752988	-0.13534613741869	-0.030528151016322	-0.0199203187250996	0	0	0	-0.0199203187250996	0.0439367311072056	-0.56035961601748	-0.0199203187250996	0.0040960936570064	0	-0.0199203187250996	0	0	0	0	0	-0.0398406374501992	-0.0199203187250996	0.175746924428823	0	0	0	0
1542	0	0	0	0	0	0	0	0	0	0	0	0	-0.00997904400758407	0	0	0	0	0.104989622025051	0	0	0	0	-0.0299371320227522	0	0	0	0	0.0192752505782575	0	0	0	0	0	-0.0199580880151681	0	0	0	0	0	0	0	-0.00997904400758407	0	-0.0006828374369106	0	0	0	0	0
1543	0	0	0	0	0	0	0	0	0	0	0	0	0	0	0	0	0	0	0	0	0	0	0	0	0	0	0	0	0	0	0	0	0	0	0	0	0	0	0	0	0	0	0	0	0	0	0	0	0
1544	0	0	0	0	0	0	0	0	0	0	0	0	0	0	0	0	0	0	0	0	0	0	-0.00555524693072607	0	0	0	0	0	0.0108143181572402	0	0	0	0	0	0	0	0	0	0	0	0	0	0	0	0	0	0	0	-0.00555524693072607
1545	0	0	0	0	0	0	0.0216356555603635	0	0	0.0216356555603635	-0.0118884860013077	0	0	0	-0.0118884860013077	0	0	0	0.0156914125597096	0	0	0	0.0530184806797827	0.0865426222414539	0	0	0	0	-0.0297212150032693	0	0	-0.00594424300065387	0	0	0	0	0	0	0	0	0	0	0	0	0	0	0	0	0.0216356555603635
1546	0	0	0	0	0	0	0	0	0	0	0	0	0	0	0	0	0	0	0	0	0	0	0	0	0	0	0	0	0	0	0	0	0	0	0	0	0	0	0	0	0	0	0	0	0	0	0	0	0
1547	0	0	0	0	0	0	0	0	0	0	0	0	0	0	0	0	0	0	0	0	0	0	0	0	0	0	0	0	0	0	0	0	0	0	0	0	0	0	0	0	0	0	0	0	0	0	0	0	0
1548	0	0	0	0	0	0	0	0	0	0	0	0	0	0	0	0	0	0	0	0	0	0	0	0	0	0	0	0	0	-0.00436338249410943	0	0	0	0	0	0.00677951505519873	0	0	0	0	0	0	0	0	0	0	0	0	0
1549	0	0	0	0	0	-0.00386637797711104	0	0	0	0.0250145918452431	0	0	0	0	0	0	0	0	0	0	0	0	0	0	0	0	0	0	0	0	0	0	0	0	0	0	0.00833819728174769	0	0	0	0	0.000605441327525599	0	0	0	0	-0.00386637797711104	0	0
1550	0	0	0	0	0	0	0	0	0	-0.0473260766682442	0.205973223480947	0	0	0	0	0	0	0	-0.141978230004733	0	0	0	0	-0.0473260766682442	0	0	0	0	0	0	0	0	0	0.158647146812703	0	0	-0.0473260766682442	0	0	0	0	0	0	0	-0.0473260766682442	0	0.102986611740474	0	0
1551	0	0	0	0	0	0	0	0	0	0	0	0	0	0	0	0	0	0	0	0	0	0	0	0	0	0	0	0	0	0	0	0	0	0	0	0	0	0	0	0	0	0	0	0	0	0	0	0	0
1552	0	0	0	-0.0213310580204778	0.0341296928327645	0	0	0	0	0	-0.0426621160409556	0	0	0	0	0	0	0	0	0	0	0	0	0	0	0	0	0	0	0	0	0	0	0	0	0	0	0	0	0.0469283276450512	0	-0.0213310580204778	0	0	0.136518771331058	0	0	0	-0.0213310580204778
1553	0	0	0	0	0	0	0	0	0	0	0	0	0	0	0	0	0	0	0	0	0	0	0	0	0	0	0	0	0	0	0	0	0	0	0	0	0	0	0	0	0	0	0	0	0	0	0	0	0
1554	0	0	0	0	0	0	0	0	0	0	0	0	0	0	-0.00432994154578913	0	0	0	0	0	0	0	-0.00865988309157826	0	0	0	0	-0.00432994154578913	0	0	0	0	0	0	0	0	0	0	0	0	0	0	0	0	0	0	0	0	0
1555	0	0	0	0	0	0	0	0	0	0	0	0	0	0	0	0	0	0	0	0	0	0	0	0	0	0	0	0	0	0	0	0	0	0	0	0	0	0	0	0	0	0	0	0	0	0	0	0	0
1556	0	0	-0.0292654375182909	0	0	-0.0292654375182909	0	0	0	0	-0.0292654375182909	0	0	0	0	-0.0585308750365818	0	-0.026029790010092	0	0	0.00647129501639701	0	0.247066090179123	0	0	0	0	0	0	0	-0.0292654375182909	0	0.156034130116051	0	0	-0.0877963125548727	0	0	0	-0.146327187591454	-0.026029790010092	0	0	0	0	0	0	0	0
1557	0	0	0	0	0	0	0.00827198279427579	0	0	0	-0.00416927246195539	0	0	0	0	0	0.0123746931265962	0	0	0	0	0	0	0	0	0	0	0	0	0	0	0	0	0	0	0	0	0	0	0	0	0	-0.00416927246195539	0	0	0	0	0	0
1558	0	0	-0.0167954316425932	0	0	0	0	0	0	0	0	0	0	0	-0.0167954316425932	0	0	0	0	0	0	0	0	0	0	0	0	0	0	0	0	0	0	0	0	0	0	0	0	0	0	0	0	0	0	0	0	0	0
1559	0	-0.0424268137462877	0	0	0	0	0	0	0	0	0	0	0	0	-0.0424268137462877	0	-0.0424268137462877	0	0	0	0	0	0	0	0	0	0	0	0	0	0	0	-0.0212134068731438	0	0	0	0	0	0	0	0	0	0	0	0	0	0	0	0
1560	0	0	0	0.0369205402978488	0	0	0	-0.00311788731955227	0	0	0	0	0	0	0	0	-0.00311788731955227	0	0	0	0	0	0	0	0.010501995379122	0	0.010501995379122	-0.00311788731955227	0	0	0	0	0	0	0	0	-0.00623577463910454	0	0.0310118786005877	0	0	0	-0.00311788731955227	0	0	0	0	0	-0.0155894365977614
1561	0	0	0	0	0	0	0	0	0	0	0	0	-0.000556783572657472	0	0	0	0	0	0	0	0	0	0	0	0	0	0	0	0	0	0	0	0	0	0	0	0	0	0	0	0.00171853786798192	0	0	0	0	0	0	0	0
1562	0	0	0	0	0	0	0	0	0	0	0.238095238095238	0	0	0.23425499231951	0	-0.17420751291719	0	0	0	0.072615556486524	0	0	0	-0.284527300656333	0	0	0	0	0	0	0	0.0212959083926825	0	0	0	0	0.119047619047619	0	0.238095238095238	0	0	0	0	0	0	0	0	0	0
1563	0	0	0	-0.0768836494105587	0	0	0	0	-0.0256278831368529	-0.0512557662737058	0	0	-0.0256278831368529	-0.0512557662737058	0	0	-0.0669749298466302	0	0	-0.0768836494105587	-0.0256278831368529	0	0	-0.0768836494105587	-0.0256278831368529	0	0	0	0	0	0	0	-0.0256278831368529	-0.128139415684264	-0.0256278831368529	0	-0.0512557662737058	0	-0.0256278831368529	-0.0768836494105587	0	0	0	0	0	-0.0512557662737058	0	0	0
1564	0	-0.0168152009416513	0	0	0	0	0	0	0	-0.00840760047082563	0.0155884645362432	0	0	0	0	0	0	0	0	-0.00840760047082563	0.0155884645362432	0	0	0	-0.0168152009416513	0	0	0	0	0	0	0	0	-0.0168152009416513	0	0	-0.00840760047082563	0	0	0	0	0	0	0	0	0	-0.00840760047082563	0	0
1565	0.0147301011031402	0	0.0364938513737632	0.00351682458374134	0	-0.0657512428371776	0	0.0217637502706229	0	0	-0.0153929038713153	0	-0.00769645193565766	0	-0.0153929038713153	0.0224265530387979	0.0589204044125611	0.0336398295581969	0	0	0	0	0	-0.023089355806973	-0.00769645193565766	-0.0153929038713153	0	-0.0384822596782883	0	0	0	-0.505828979245591	0.0182469256868816	-0.442011774173362	-0.00769645193565766	0	0	-0.00769645193565766	0	-0.0426618870302046	0	0	-0.0041796273519163	-0.0125388820557491	-0.069268067420919	0	0	-0.00769645193565766	0.0105504737512239
1566	0	0	0	0	0	0	0	0	0	0	0	0	0	0	0	0	0	-0.00987947046038332	0	0	0	0	0	0	0	0	0	0	0	0	0	0	0	0	0	0	0	0	0	0	0	0	0	0	0	0	0	0	0
1567	0	0	0	-0.0359259924555416	0.0321543408360129	-0.0179629962277708	0	0	0.160771704180064	0	0.0695185281663824	0	0	0	0	0	0	-0.0089814981138854	0	0	0	0	0	0	0	0	0	0	-0.0089814981138854	-0.0179629962277708	-0.0089814981138854	0	0.0231728427221275	0	0	0	0	0	0	0	0	0.0231728427221275	0	0	0	-0.0089814981138854	0	-0.0089814981138854	0
1568	0	0	0	0	0	0	0	0	-0.0133333333333333	0	0	0	0	0	0	0	0	0	0	-0.0266666666666667	0	-0.0133333333333333	0	0	-0.178265023887352	-0.0133333333333333	0.0251445813427206	0	0	0.0739116587042163	0	0	0	0	0	0.0251445813427206	0	-0.0533333333333333	0	-0.0666666666666667	0	0	0.00876707736149521	-0.0133333333333333	0	-0.0933333333333333	-0.0266666666666667	0	-0.0133333333333333
1569	0	0	0.165614452830601	-0.0223914017017465	0	0.0647166122355357	-0.0447828034034931	-0.0696317979749438	0	0	0	-0.134348410210479	-0.0671742051052396	-0.003686389304556	-0.564700228283071	-0.381882625364543	0	0	0	0	0	0	-0.116872194248141	0.217770034843206	0.0435540069686411	0.0871080139372822	0.0435540069686411	0	-0.0223914017017465	0	0	-0.0447828034034931	0	0	0	0	0	0	-0.0895656068069861	0	0	0	0	0	0	0	0	0	-0.0671742051052396
1570	-0.0760456273764259	0	0	0	-0.0760456273764259	0	0	0	0	0	-0.152091254752852	0	0	0	-0.0760456273764259	0	0	-0.228136882129278	0	0	-0.152091254752852	0	0	0	0	0	0.245098039215686	0	0	0	-0.0760456273764259	0	-0.152091254752852	0	0	0.122549019607843	0	0	0	0	0	0	0	0	0	0	0	0	0
1571	0	0	0	0	0	0	0	0	0	0	0	0.00665099986698	0	-0.0012605412764241	0	0	-0.0012605412764241	0	0	0	0.0026095043281908	0.0031734586348959	0	0	0	0	0.00221699995566	0	0	0	0	0	0	0	0	0	0	0	0	0	0	0	0	0	0	0	0	0	0
1572	0	0.247786070613713	0	0	0.131578947368421	0.263157894736842	0.131578947368421	1.18421052631579	0	-0.0734753857457752	0	0	0	0.217042422367454	-0.382748752852005	3.46900498859198	0.948412544955334	0.042731737499516	0.394736842105263	0	0	0	0	0.131578947368421	0	-0.266541629606714	0.0581035616226458	0.11804400788893	-0.0734753857457752	0	0.394736842105263	0.189682508991067	0	0	0	-0.0734753857457752	0	0	0	0	-0.0734753857457752	0	-0.0734753857457752	0	0	-0.0734753857457752	-0.514327700220426	0	0.131578947368421
1573	0	0	0	0	0	0	0	0	0	0	0	0	0	0	0	0	0	0	0	0	0	0	0	0	0	0	0	0.0195160031225605	0	0	0	0	0	0	0	0	0	0	0	0	0	0	0	0	0	0	0	0	0
1574	0	0	0	0	0	0	0	0	-0.0160926939169617	0	0	0	0.0987654320987654	0	0	-0.0160926939169617	0	0	0	0	0	0	0	-0.0321853878339234	0	0	0	0	0	0	0.0493827160493827	0	0	0	0	0.347888280942674	0	0	0.0987654320987654	0	0.0171973282154593	0	0	0	0.297400930594794	0.0493827160493827	0.115962760314225	0	0.019406596812454
1575	0	0	0	-0.0263782643102084	0	-0.0263782643102084	0	0	0	0	0	0	0	0	0	0	0	0	0	0	0	0	0	0	0	0.154241645244216	0	0	0	0	0	0	0	0	0	0	0	0.051413881748072	0	0	0	0	0	0	0	0	0	0	0
1576	0	0	0	0	0	0	0	0	0	0	0	0	0	0	0	0	0	0	0	0	0	0	0	0	0	0	0	0	0	0	0	0	0	0	0	0	0	0	0	0	0	0	-0.0754432289701999	0	0	0	0	0	0
1577	0	0	0	0	0	0	0	0	0	0	0	0.0967117988394584	0	0	0	0	0	0	0	0	0	0	0	0	0	0	0	0	-0.0478468899521531	0.0967117988394584	0	0	0	0.145576707726764	0	0	0	-0.0478468899521531	0	0	0	0	0	0.0967117988394584	0	0	0	0	0
1578	0	0	0	0	0	0	0	0	0	0	0	0	0	0	0	0	0	0	0	0	0	0	0	0	0	0	0	0	0	0	0	0	0	0	0	0	0	0	0	0	0	-0.00612932883849219	-0.00306466441924609	0	0	0	0	0	0
1579	0	0	0	0	0	0	0	0	0	0	0	0	0	0	0	-0.0564174894217207	0	0.0460578724447282	0	-0.0192841808439264	-0.0282087447108604	0	0	0	-0.0564174894217207	0	0	0	0	0	0	-0.0564174894217207	0	0	0	0	0.0371333085777943	0	0	0	0	-0.0282087447108604	0	0	0	0	0.0371333085777943	-0.0564174894217207	0
1580	0	0	0	0	0	0	0	0	0	0	0	0	0	0	0	0	0	-0.159172304019101	0	0	0	0	0	0	0	0	0	0	0	0	0	0	0	0	0	0	0	0	0	0.198807157057654	0	0	0	0	0	0	0	0	0
1581	0	0	0	0	0	0	0	0	0	0	0	0	0	0	0	0	0	0	0	0	0	0	0	0	0	0	0	0	0	0	0	0	0	0	0	0	0	0	0	0	0	0	0	0	0	0	0	0	0
1582	0	0	0	0.0338868180277872	0	0	0	0	0	0	0	0	0	0	0	0	-0.012306177701206	0	0	0	0	0	0	0	0	0	0	0	0	0	0	0	0	0	0	0	0	0	0	0	0	0	0	0	0	0	0	0	0
1583	0	0.179856115107914	0	-0.0960153624579933	0	-0.0480076812289966	-0.0960153624579933	0.179856115107914	0	0	-0.0060873049040365	-0.0480076812289966	0	0	0	0	0	0	-0.0960153624579933	0	0	-0.0480076812289966	0	-0.0540949861330332	-0.0480076812289966	0	0.0419203763249602	-0.240038406144983	0	-0.0480076812289966	-0.060182291037069	0	-0.300220697182052	0.221776491432873	-0.384061449831973	-0.0480076812289966	0	0.0899280575539568	0	0	0	0	0	0	0	0	0	-0.0960153624579933	-0.0480076812289966
1584	-0.0792393026941363	0	0	0	0	0	0	0	0	0	0	0	0	0	0	-0.475435816164818	0	0	0	-0.0792393026941363	0	0	0	0	0	0	-0.0792393026941363	0	0	0	-0.158478605388273	-0.0792393026941363	-0.475435816164818	-0.0792393026941363	0	-0.0792393026941363	0	-0.0792393026941363	0	0	0	-0.0792393026941363	0	0	0	0	0	0	0
1585	0	0	0	0	-0.0143256213738271	0	0	0	0	0	0	0	0	0	0	0	0	0	0	0	0	0	0	0	0	0	0	0	0	0	0	0	0	0	0	0	0	0	0	0	0	0	0	0	0	0	0	0	0
1586	0	0	0	0	0	0	0	0	0	0	0	0	0	0	0	0	0	0	-0.0448833034111311	0	0	0	0	0	-0.0448833034111311	0	0.0878734622144113	0	0	0	0	0	0	-0.0448833034111311	0	-0.0448833034111311	0	0	0	0	0	0	0	0	0	0	0	0	0
1587	0	0	0	0	0	0	-0.114744693057946	0	0	0	0	0	0	0	0	0	0	0.426894343649947	0	0	0	0	0	0	0	0	0	0	-0.229489386115892	0	-0.172117039586919	0	0	0	-0.057372346528973	0	0	0	0	0	0	-0.057372346528973	0	0	-0.172117039586919	0	0	0.106723585912487	0
1588	0	0	0	0	0	0	0	0	0	0	0	0	0	0	0	0	0	0	0	0	0	0	0	0	0	0	0	0	0	0	0	0	0	0	0	0	0	0	0	0	0	0	0	0	0	0	-0.05941770647653	0	0
1589	0	0	-0.00417553968850474	0	0	0	0	0	0	0	0	0	0	0	0	0	0	0	0	0	0	0.00749344323716748	0	0	0	0	0	0	0	0	0	0	0	0	0	0	0	0	0	0	0	0	0	0	0	0	0	0	0
1590	0	0	0	0	0	0	0	0	0	0	0	0	0	0	0	0	0	0	0	0	0	0	0	0	0	0	0	0	0	0	0	0	0	0	0	0	0	0	0	0	0	0	0	0	0	0	0	0	0
1591	-0.0254939451880178	0	0	0	0	0	0.097812752130328	0	0	-0.152963671128107	0.144508670520231	0	0	0	0	0	-0.0382409177820268	0.0722543352601156	-0.114658281663885	0.0722543352601156	0	0	0	0	0	0	0	-0.0127469725940089	0	-0.0382409177820268	0	0	0	0	-0.0127469725940089	0	0	0	0	0	0	0	-0.0127469725940089	0	0	0	0	0	0
1592	0	-0.0356379187455453	0	0.0699300699300699	0	0	0	0	0	0	0	0	0	0	0	0	0	0	-0.0712758374910905	0	0	0	0	0	0	0	0	0	0	0.27972027972028	0	0	0	0.0699300699300699	0	0	0	0	0	0	0	-0.0013457675610206	0	0	0.314012430904805	0	0	0.0699300699300699	0
1593	0	0	0	0	0	0	0	0	0	0	0	0	0	0	0	0	0	0	0	0	0	0	0	0	0	0	0	0	0	0	0	0	0	0	0	0	0	0	0	0	0	0	0	0	0	0	0	0	0
1594	0	0	0	0	0	0	0	0	0	0	0	0	0	0	0	0	0	0	0	0	0	0	0	0	0	0	0	0	0	0	0	0	0	0	0	0	0	0	0	0	0	0	0	0	0	0	0	0	0
1595	0	0	0	0	0.0209523395371546	0	0	0	0	0	0	0	-0.016594756057086	0	0	0	0	0	0	0.0541418516513265	0	0	-0.016594756057086	0	0	0	-0.016594756057086	0.0541418516513265	0	0	0	0	0	0	0	0	0	0	0	0	0	0	0	0	0	0	0	0	0
1596	0	0	0	0.0278413543360363	-0.0149476831091181	0	0	0	0	0.0577367205542725	0	0	0	0	0	0	0	0	0	0	0	0	0	0	0	0	0	0	0	0	0	0	0	0	0	0	0	0	0	0	0	0	0	0	0	0	0	0	0
1597	0	0	0	-0.0289687137891078	0	-0.0289687137891078	0	0	0	0	0	0	0	0	0	0	0	0	0	0	0	0	0	0	0	0	0	0	0	0	0	0	0	0	0	0.24	0	0	0	0	0	0	0	0	0	0	0	0	0
1598	0	0	0	0	0	0	0	0	0	0	0	0	0	0	-0.0430663221360896	0	0	0	0	0	0	0	0	0	0	0	0	0	0	0	0	0	0	0	0	0	0	0	0	0	0	0	0	0	0	0	0	0	0
1599	0	0	0	0	0	0	0	0	0	0	0	0	0	0	0	0	0	0	0	0	0	0	0	0	0	0	0	0	0	0	0	0	0	0	0	0	0	0	0	0	0	0	0	0	0	0	0	0	0
1600	0	0.0275558004960044	0	0	0	0	0	0	0	0	0	0	0	0	0	0	0	0	0	0	0	0	0	0	0	0	0	0	0	0	0	0	0	0	0	0	0	0	0	0	0	0	0	0	0	0	0	0	0
1601	0	0	0	0.311526479750779	0	0	0	0	-0.128949065119278	0	0	0	0	0	0	0	0	0	0	0	0	0	0	0	0	0	0	0	0	0	0	0	0	0	0	0	0	0	0	0	0	-0.0644745325596389	0	0	0	0	0	0	0
1602	0	0	0	0	0	0	0.0252844500632111	0	0	0	-0.0184837573822143	0	0	0	0	0	0	0	0	0.0252844500632111	0	0.0126422250316056	0	0	0	0	0.0525088633792684	0	0	0	0.012598939847465	0	0	0.055407986962502	0.00486072942815062	0	0	0.196390782970939	-0.01556299120691	0	0	0	0	0	0	0	0	-0.265573296031998	0.0252844500632111
1603	-0.0159863583075775	0.00772533967601299	0.0271091491671132	-0.0363358352581792	-0.0087262372860485	0.066341986803797	0.0678081030683167	0.0188833606860824	0.186472283437871	0.104609156980979	-0.0440964050847263	-0.0852605776404135	-0.0746030054353618	0.049389961036718	0.179176932265808	0.0939515847759277	0.0082257884810307	-0.0532878610252584	0.000465218654483998	0.0179176932265808	0.0169520257670792	0.0019313349190032	0.121561182748059	0.0769995590088487	0.054218298334226	0.013054125778539	0.10314304071646	0.062909305469741	-0.041199402706221	0.109437494278488	-0.010192353550568	-0.093521596271978	-0.103213501017529	0.080826998696322	-0.112905405763078	0.101712154602475	0.188297927905273	0.03676582376213	0.024677365443092	0.203889527859434	0.203389079054416	0.009156225789999	-0.035905846754229	-0.110473622039057	-0.04023373524672	0.01401979323804	-0.0547539772897773	-0.0876923613644345	-0.0227812606746227
1604	0	0.0959232613908873	0	-0.0240963855421687	0	0	0	0	0	0	0	0	0	0	0	0	0	0	0	0	0	0	0	0	0	0	0	0	0	0	0	0	0	0	0	0	0	0	0	0	0	0	0	0	0	0	0	0	0
1605	0	0	0	-0.0352609308885755	0	0	0	0	0	0	0	0	0	0	0	0	0	-0.0352609308885755	0	0	0	0	-0.0352609308885755	0	0	0	0	0	0	0	0	0	0	0	0	0	0	0	0	0	0	0	0	0	0	0	0	0	0
1606	-0.0228728270814273	0	0	0.0263921879123779	0	0.0527843758247559	-0.0114364135407136	-0.0228728270814273	0	0	0	0	0.0263921879123779	-0.0114364135407136	0	-0.0228728270814273	0	0	0	0	0	0	0	-0.0228728270814273	0	-0.0114364135407136	0	0	0	0	0	0	0	0	0	0	0	-0.0228728270814273	-0.0457456541628545	0	0	-0.0114364135407136	0	-0.0114364135407136	0	0	0	0	0
1607	0	0	-0.0435729847494553	0	0	0	0	0	0	0	0	0	0	0	0	0	-0.0871459694989107	0	0	0	0	0	0	0	0	0	0	0	0	0	0	0	0	0	0	0	0	0	0	0	-0.0871459694989107	0	0	0	0	0	0	0	0
1608	0	-0.00432021428262842	0	0	0	0	0	0	0	0	0	0	0	-0.00864042856525684	0	0	0	0	0	0	0	0	0	0	0	0	0	0	0	0	0	0	0	0	0	0	0	0	0	0	0	0	0	0	0	0	0	0	0
1609	0	0	-0.00547016027569608	0	0	0.0132397722759169	-0.0109403205513922	0	0	-0.0109403205513922	0	0	0	0	-0.00547016027569608	0	0	0	-0.00547016027569608	0	0.00776961200022082	0	0	-0.0164104808270882	0	0	-0.00547016027569608	0.0132397722759169	0.0155392240004415	0.00776961200022082	0	-0.0164104808270882	-0.00547016027569608	0	-0.0250513496539556	0	0.0264795445518337	-0.0109403205513922	0.0264795445518337	0	-0.0164104808270882	0.0598574442772415	-0.0336922184808232	0.115115985105433	-0.00547016027569608	-0.0164104808270882	0	-0.0109403205513922	-0.00547016027569608
1610	0	0	0	0	-0.0190985485103132	0	0.0382866414543653	0.0638409172351885	0.111632060727841	0	0	0	0	0	0.0989892394880374	0	0	0.0830290101792404	0	0	0	0	0.0223264121455682	0	-0.00636618283677107	0.0095940464720261	0	0.191522751705566	-0.0127323656735421	0	0	0	0	0	0.0478806879263914	0	0.0223264121455682	0	0	0.133958472873409	0.0446528242911364	-0.00636618283677107	0	0	0	0.0446528242911364	-0.0127323656735421	0	0
1611	0	0	0	0	-0.0273560388455752	0	0	0	0	0	0	0	-0.0683900971139379	0	0	0	0	0	0	0	0	-0.0533242246137591	0	0	0	0.0150658725001788	0	0	0	0	0	0	0	0	0	0	0	-0.0410340582683627	0	0	0	0	0	0	0	0	0	-0.0410340582683627	0
1612	0	0	0	0	0	0	0	0	0	0	0	0	0	0	0	0	0	0	0	0	0	0	0	0	0	0	0	0	0	0	0	0	0	0	0	0	0	0	0	0	0	0.0310462589257994	0	0	0	0	0	0	0
1613	-0.108406881267946	-1.70732550853915	-0.0487449757123172	-0.13531799729364	0.094987234208531	-0.0390794044770572	-0.12565242605838	-0.265558738248209	0.0184969033984856	-0.01933114247052	-4.91490015622369	-0.165983189143489	-0.0680761181828372	0.0084142126272084	0.21682757444106	-0.030665191849849	-0.186982809758078	-0.098324190496669	-0.39516689394617	-0.13531799729364	0.065573400966734	0.084487423901237	-0.07085231112123	0.0571591883395256	-0.0584105469475772	-0.107155522659894	0.128644084717365	0.365695050702675	0.0180797838624684	0.34977268642716	0.065573400966734	0.0088313321632256	-0.05799342741156	-0.0882414997253916	0.14206373177678	-0.060079025091646	0.065156281430717	-0.203394115476477	1.91031631638478	-0.059661905555629	0.182049197232735	-0.0970728318886172	0.61241158792325	0.045825138960197	-0.0689103572548716	0.00973739314212407	-0.0399136435490916	-0.025587935510778	0.0285795941697628
1614	0	0	0	0.0191021967526266	0	-0.0095831336847149	0	0	0	0	0	0	0	0	0	0	0	0	0	0	-0.0479156684235745	0	0	0	0	0	0	0	0	0	0	0	0	0	0	0	0	0	0	0	0	0	0	0	0	0	0	0	0
1615	0	0	0.0355239786856128	0	-0.0141843971631206	0.0355239786856128	-0.0283687943262411	-0.0141843971631206	0	0	0	0	0	0	0	0	0	0	0	0	0	0	0	0	0	0	0	-0.0141843971631206	0	0	0	-0.375697567489261	0	0	0	0	0	0	0	0	0	0	0	0	0	0	0	0	0
1616	0	0	0	0	0	0	0	0	0	0	0	0	0	0	0	0	0.0132855055134848	0	0	-0.00650914534921565	0	0	0	0	0	0	0	0	0	0	0	0	0	0	0	0	0	0	0	0	0	0	0	0	-0.0195274360476469	0	0	0	0
1617	0	0	0	0.00468211619383321	0	0	0	0	0	0	0	0	0	0	0	0	-0.00240497348516733	-0.00120248674258366	0	0	0	-0.00240497348516733	0	0	0	0	0	0	0	0	0	-0.00120248674258366	0	0	0	0	0	0	0	0	0	0	0	-0.00240497348516733	0	0	0	0	0
1618	0	0	0	0	0	0	0	0	0	0	0	0	0	0	-0.00698015309802462	0	0	0	0	0	0	0	0	0	0	0	0	0	0	0	0	0	0	0	0	0	0	0	0	0	0	0	0	0	0	0	0	0	0
1619	-0.0928074245939675	0.2	0	0.2	-0.0928074245939675	-0.139211136890951	0.00719257540603251	0.153596287703016	-0.232018561484919	-0.0464037122969838	-0.139211136890951	-0.0464037122969838	0	-0.0464037122969838	0	0	0	0	0.1	0	-0.185614849187935	-0.0464037122969838	0.107192575406033	0	0.107192575406033	0	0.1	-0.0464037122969838	0	-0.0928074245939675	-0.185614849187935	0.1	-0.0464037122969838	0	-0.139211136890951	0.00719257540603251	0	0	0	0	0	-0.0464037122969838	0	-0.185614849187935	0	0	0	0	0
1620	0	0	0	0	0	0	0	0	0	0	0	0	0	0	-0.00248712910687194	0	0	0	-0.00994851642748775	0	0	0	0	0	0	0	0	0	0	0	0	0	0	0	0	0	-0.00248712910687194	0	0	0	0	0	0	0	0	0	0	0	0
1621	0	0	0	0	0	0	0	0	0	0	0	0	0	0	0	0	0	0	0	0	0.0382409177820268	0	0	0	0	0	0	0	0	0	0	0	0	0	0	0	0	0	0	0	0	-0.0138007176373171	0	0	0	0	0	0	0
1622	0	0	0	0	0	0	0	0	0	0	0	0	0	0	0	0	0	0	0	0	0	0	0	0	0	0	0	0	0	0	0	0	0	0	0	0	0	0	0	0	0	0	0	0	0	0	0	0	0
1623	0	0	0	0	0	0	0	0	0	0	0	0	0	0	0	0	0	0	0	0	0	0	0	0	0	0	0	0	0	0	0	0	-0.00668292845925084	0	0	0	0	0	0	0	0	0	0	0	0	0	0	0	0
1624	0	0	0	0	0	0	0	0	0	0	0	0	0	0	0	0	0	0	0	0	0	0	0	0	0	0	0	0	0	0	0	0	0	0	0	0	0	0	0	0	0	0	0	0	0	0	0	0	0
1625	0	0	0	0	0	0	0	0	0	0	0	0	0	0	0	0	0	0	0	0	0	0	0	0	0	0	0	0	0	0	0	0	0	0	0	0	0	0	0	0	0	0	0	0	0	0	0	0	0
1626	0	0	0	0	0	0	0	0	0	0	0	0	0	0	0	0	0	0	0	0	0	0	0	0	0	0	0	0	0	0	0	0	0	0	0	0	0	0	0	0	0	0	0	0	0	0	0	0	0
1627	0	0	0	0	0	0	-0.0103551827689759	0	-0.0103551827689759	0	0	0	0	0	0	0	0	0	0	0	0	0	0	0	0	0	0	0	0	0	0	0	0	0	0	-0.0103551827689759	0	0	0	0	0	0.0318066157760814	-0.004807057649911	-0.0103551827689759	0	0	0	0	0
1628	0	0	0	0	0	0	0	0	0	0	0	0	0	0	0	0	0	0	0	0	0	0	-0.0420875420875421	0	0	0	0	0	0	0	0	0	0.255264837268666	0	0	0	0	0	0	0	0	0	0	0	0	0	0	0	0
1629	0	0	0	0	0	0	0	0	0	0	0	0	0	-0.0144490126823587	0	0	0	0	0	0	0	0.0461727522208438	0	-0.00639427073342285	0	-0.0191828122002686	0	0.0222561405026654	0	-0.00639427073342285	0.0175223409847556	0	0	0	-0.00639427073342285	0	-0.0191828122002686	0	0	0	0	0	0	0	-0.0319713536671143	0	0	-0.00639427073342285	0
1630	0	0.031782377576668	0	-0.019657951641439	-0.00129435072536199	-0.0589738549243169	-0.019657951641439	0	0	-0.117947709848634	-0.618224377316177	-0.019657951641439	-0.157263613131512	0	-0.0393159032828779	-0.019657951641439	0	0	0	-0.019657951641439	0	-0.019657951641439	0	-0.294869274621584	-0.019657951641439	0	-0.137605661490073	0	-0.0786318065657558	0	0	0	0	0	0	0	-0.019657951641439	0	0	0	0	-0.0393159032828779	0.198227791166218	0	-0.019657951641439	0	0	0	0
1631	-0.0279329608938547	0	0	0	0	0	0	0	0	-0.111731843575419	0	0	-0.0279329608938547	0.281214848143982	0.112485939257593	-0.0558659217877095	0	-0.0558659217877095	0.168728908886389	0	0	0	0	-0.0279329608938547	0	0	0	0	0.0845529783637383	0	0	0	0.112485939257593	0	-0.0279329608938547	0	0.281214848143982	0	-0.0558659217877095	0.0562429696287964	0	-0.0558659217877095	0	-0.0558659217877095	0	0	0	-0.0837988826815642	0
1632	0	0	0	0.041028349494552	-0.0141242937853107	0	0	-0.0141242937853107	0.038001140034201	-0.00874348264346231	0.0570017100513015	0	0.233387651347054	0.0575062449613601	0	0	0	0.207661738326726	-1.26226046668406	-0.035983000393967	0.0667542625148811	0.0190005700171005	0.0482582274078396	0.328895036342615	0.301150983682053	0.171509665063963	-0.0559926402311845	0.110136213690931	0	0	0	0.0667542625148811	1.05394390645279	-2.8401477750547	-0.110976210642252	-0.0326203288923527	0	0.0760022800684021	0.156880836368594	0.264663448378027	-0.0842412278018055	0.339152123716254	0.0618779862830914	-1.88945640120616	0.0575062449613601	0	-0.0282485875706215	-16.8243687141123	-0.129472245749294
1633	0	0	0	0	0	0	0	0	0	0	0	0	0	0	0	0	0	0	0	0	0	0	0	0	0	0	0	0	0	0	0	0	0	0	0	0	0	0	0	0	0	0	0	0	0	0	0	0	0
1634	0	0	0	0	0	0	0	0	0	0	0	0	0	0	0	0	0	0	0	0	0	0	0	0	0	0	0	0	0	0	0	0	0	0	0	0	0	0	0	0	0	0	0	0	0	0	0	0	0
1635	0	0	0	0	-0.0205044084478163	0	0.0346380325597506	0	0	0	0	0	-0.0410088168956326	0	0	0	0	0	0	0	0	0	0	0	0	0	0	0	0	0	0	0	0	0	0	0	0	0	0	0	0	0	0	0	0	0	0	0	0
1636	-0.0120091269364717	-0.00714915534878757	-0.0180136904047076	-0.0210159721388255	0.0333067031407742	0.0048599715876841	-0.00600456346823586	-0.00801214316386231	0.00971994317536824	-0.00114459188055176	-0.0150114086705896	0.00185768985356617	0	0	-0.00300228173411793	-0.00114459188055176	0.0175821964971702	0.0048599715876841	-0.00900684520235379	0	-0.00900684520235379	-0.00300228173411793	0.00185768985356617	-0.00300228173411793	0.00786225332180203	-0.0180136904047076	-0.0311674092217311	0.0157245066436041	-0.00114459188055176	0	-0.00600456346823586	0	-0.00900684520235379	0	0	-0.00300228173411793	0	0	-0.00300228173411793	0	0	0	-0.00600456346823586	-0.00300228173411793	0.0194398863507364	-0.0150114086705896	-0.0101514370829056	-0.00300228173411793	-0.00900684520235379
1637	-0.00149956512611343	0	0	0	0	-0.00149956512611343	0	0	0	0	0	0	0	0	0	0	0	0	0	0	0	0	0	-0.00149956512611343	0	0	0	0	0	0	0	0	0	0	0	-0.00149956512611343	0	0	0	0	0	0	0.0047666714333381	0	0	0	-0.00149956512611343	0	0
1638	0	0	0	0	0	0	0	0	0	0	0.300751879699248	0	0	0	0	0	0	0	0	0	0	0.075187969924812	0	0	0.113584181203561	0	0	0.310378595495361	0	0	0	0	0.150375939849624	0	0	0.0016044526326854	0	0	0	0	0.075187969924812	0	0.0383962112787487	0	0	0	-0.255937857889758	0.150375939849624	0
1639	0.310318076027929	0	0.155159038013964	0	0.107720707843186	0	0.0775795190069822	0	0	0	0	0	0	0.262879745857151	0	0	0	-0.047438330170778	0.155159038013964	-0.047438330170778	0.0775795190069822	0.310318076027929	0.370600453700337	0.232738557020946	0.0775795190069822	0.387897595034911	0.13786189667939	-0.142314990512334	0.0775795190069822	0	0	0.155159038013964	0.340459264864133	2.2114211184111	-0.258941886021407	0.5939175890582	1.86584631600332	0	0	0.155159038013964	0.0775795190069822	0	0	-0.047438330170778	0	0	-0.207050462017686	0	0
1640	0	0	0	0	0	0	0	-0.00623247117482082	0	0	0	0	0	0	0	0	0	0	0	0	0	0	0	0	0	0	-0.00623247117482082	0	0	0	-0.00623247117482082	0	0	0	0	0	0	0	0	0	0	0	0	0	0	0	0	0	-0.00623247117482082
1641	0	0.0159821000479463	0	0	0	0	0	0	0	0	0	0	0	0	0	0	0	0	0	0	0	0	0	0	0	0	0	0	0	0	0	0	-0.00764409111756612	0	0	0	0	0	0	0	0	0	0	0	0	0	0	0	0
1642	-0.0632111251580278	0	0	0	0	0	0	0	0	0	0	0	0	0	0	-0.0632111251580278	0	0	0	0	0	0	0	0	0	0	0	0	0	0	0	0	0	0	0	0	0	0	0	0	0	0	0	0	0	0	0	0	0
1643	0	0	-0.00332502078137988	0.00762020879372095	0	0	0	-0.0013846863194575	0	0	0	0.0195356055997829	0	0.0138557312679844	0.00762020879372095	0.0333913368677673	0.0152404175874419	0	-0.00332502078137988	0	-0.0469648100278148	0	0	-0.00997506234413965	-0.010389581432636	0	0	-0.020779162865272	0	0	-0.0123299158945584	0	0	0	0	-0.00900489511317845	0	0	0.011915396806062	0	0	0	-0.00665004156275977	0	-0.0256299990200779	0	0	-0.00665004156275977	0
1644	0	0	0	0	0	0	0	0	0	0	0	0	0	0	0	0	0	0	0	0	0	0	0	0	0	0	0	0	0.0255623721881391	0	0	0	0	0	0	0	0	0	0	0	0	0	0	0	0	0	0	0	0
1645	-0.0658183413777973	0	0	0.190761859467809	0.0911577028258888	-0.0877577885037297	0.015246282460349	0	-0.013492993309902	-0.0269859866198038	0	-0.0658183413777973	-0.00164662517171199	-0.0877577885037297	0	0	-0.0438788942518649	0.151929504709815	-0.0185395328037732	-0.0219394471259324	0	-0.177162202179171	0	0	-0.0219394471259324	-0.317245338750797	0.0303859009419629	-0.0658183413777973	0.0388323547579935	0	-0.0658183413777973	0.0911577028258888	-0.0219394471259324	0	0.0253393614480915	0	0.0084464538160305	0.151929504709815	-0.11123719682264	0	0.177268866157906	-0.0877577885037297	0.417062823350185	0.0607718018839259	-0.0658183413777973	0.334458238319063	-0.0404789799297062	-0.578658751132807	0.0641717162060853
1646	0	0	0	0	0	0	0	0	0	0	0	0	0	0	0	0	0	0	0	0	0	0	0	0	0	0	0	0	0	0	0	0	0	0	0	0	0	0	0	0	0	0	0	0	0	0	0	0	0
1647	0	0	0	0.247157686604053	0	0	0	0.0494315373208107	0	0	0	0	0	0	0	0	0	0	0	0	0	0	0	0	0	0	0	0	0	0	0	0	0	0	0	0	0	0	0	0	0	0	0	0	0	0	0	0	0
1648	0	0	0	0	0	0	0	0	0	0	0	0	0	0	0	0	0	0	0	0	0	0	0	0	0	0	0	0	0	0	0	0	0	0	0	0	0	0	0	0	0	0	0	0	0.302571860816944	0	0	0	0
1649	0	0	0	0	0	0	0	0	0	0	0	0	0	0	0	0	0	0	0	0	0	0	0	0.053134962805526	0	0	0	0	0	0	0	0	0	0	0	0	0	0	0	0	0	0	0	0	0	0	0	0	0
1650	0	-0.0382165605095541	0	0	0	0	0	0	0	0	0	0	0	0	0	0	0	0	0	0	0	0	0	0	0	0	0	0	0	0	0	0	0	0	0	0	0	0	0	0	0	0	0	0	0	0	0	0	0
1651	0	0	0	0	0	0	0	0	0	0	0	0	0	0	0	0	0	0.0134608341614371	0	0	-0.0859598853868195	0	0	0	0	-0.0362495256126912	0	0	0	-0.064902820741631	0	0	0	0	0	0	0	0	0	0	0	0	0	0	0	0	0	0	0
1652	0	0	-0.00294550810014728	0	0.00615346747892437	0	-0.00883652430044183	0	0	0	0	0	-0.00294550810014728	0.0184604024367731	0	0	0	0	0	0	0	0	0	0	-0.00294550810014728	0	0	0	0	0	0.0307673373946219	0	0	-0.00589101620029455	0.00615346747892437	0	0	0	0.0283467318517342	-0.00589101620029455	0.0123069349578487	0	0	0.00615346747892437	0	-0.00883652430044183	0	-0.00589101620029455	-0.0249348652295466
1653	0	0	0	0	0	0	0	0	0	0	0	0	0	0	0	0	0	0	0	0	0	0	0	0	0	0	0	0	0	0	0	0	0	0	0	0	0	0	0	0	0	0	0	0	0	0	0	0	0
1654	0	0	0	0	0	0	0	0	0	0	0	0	0	0	0	0	0	0	0	0	0	0	0	-0.00621890547263682	0	0	0	0	0	0	-0.00621890547263682	0	0	0	0.0218173884586015	0	0	0.0218173884586015	0	0	0	0	0	0	0	0	0	0	0
1655	-0.0107776041386	0	0	0	-0.0215552082772	-0.0107776041386	0	-0.00538880206929999	0	0	0	0	0	0	-0.0161664062079	0	-0.00538880206929999	0	0	-0.00538880206929999	0	0	0	0	0	0	0	0	0	0	0	0	0	0	0	0	0	0	-0.0161664062079	0	0	0	0	0	0	0	0	0	0
1656	0	0	0	0	0	0	0	0	0	0	0	0	0	0	0	0	0	0	0	0	0	0	0	0	0	0	0	0	0	0	0	0	0	0	0	0	0	0	0	0	0	0	0	0	0	0	0	0	0
1657	0	0	0	0	0	0	0	-0.0445037828215398	0	0	0	0	0	0	0	0	0	-0.0445037828215398	0	0	-0.0445037828215398	0	0	-0.0445037828215398	0	0	0	0	0	0	0.232018561484919	0	0	0	0	0	0	0	0	0	0	0	0	-0.0445037828215398	0	0	0	0	0
1658	0	0	0	-0.018964536317087	-0.113787217902522	-0.018964536317087	0	0	0	0	0	0	0	0	0	0	0	0	0	0	0	0	0	0	-0.018964536317087	0	0	0	0	0	0	0	-0.0568936089512611	0	0	0	0	0	0	0	0	0	0	0	0	0	0	0	0
1659	0.182958731802564	0	0.114942528735632	0.344827586206897	-0.187705302674801	-0.0938526513374003	0	0.178212160930328	-0.072762773939169	-0.1407789770061	0	0.0210898773982317	-0.328484279680901	-0.0469263256687001	-0.0938526513374003	-0.286304524884438	-0.469263256687001	-0.0469263256687001	-0.307394402282669	0.058523061322459	-0.307394402282669	0.229885057471264	-1.78320037541061	-0.603192068911575	-0.035329590014941	-0.964362961644468	-0.16451183136728	-0.286304524884438	-0.422336931018301	-0.187705302674801	0	-0.469263256687001	0.063269632194696	0.0210898773982317	-0.1407789770061	0	0	-0.0469263256687001	-0.0938526513374003	-0.1407789770061	0	-0.0469263256687001	0	0	0	0	0	0	0
1660	0	0	0	0	0	0	-0.0702493853178785	0	0	0	-0.0702493853178785	0	0	0	0	0	0	0	0	0	0	0	0	0	0	0	0	0	0	-0.0022684199881708	0	0	0	0	0	0	0	0	0	0	0	0	0.0679809653297077	0	0	0	0	0	0
1661	0	0	0	-0.00732225232481511	0	0	-0.0146445046496302	0	-0.0146445046496302	0	0	0	0	0	0	0	0	0	0	-0.0146445046496302	-0.00732225232481511	0	0	0	0	0	0.0180635838150289	0	0	0	-0.00732225232481511	0	0	0	0	0	0	0	0	0	0	0	0	0	0	0	0	0	0
1662	0	0	0	0	0	0	0	0	0	0	0	0	0	0	0	0	0	0	0	0	0	0	0	0	0	0	0	0	0	0	0	0	0	0	0	0	0	0	0	0	0	0	0	0	0	0	0	0	0
1663	0.0308071472581639	0	0	0	0	0	0	0	-0.0200662185211197	0	0	0	0	0	0	0	0	0	0	0	0	0	0	0	0	0	0	0	0	0	0	0	0	0	0	0	0	0	0.0308071472581639	0	0	0	0	0	0	0	0	0	-0.0200662185211197
1664	0	0	0	0	0	0	0	0	0	0	0	0	0	0	0	0	0	0	0	0	0	0	0	0	0	0	0	0	0	0	0	0	0	0	0	0	0	0	0	0	0	0	0	0	0	0	0	0	0
1665	0	0	0	0	0	0	0	0	0	0	0	0	0	0	0	0	0	0	0	0	0	0	0	0	0	0	0	0	0	-0.0059509640561771	0	0	0	0	0	0	0	0	0	0	0	0	0	0	0	0	-0.0059509640561771	0	0
1666	0	0	0	0	0	0	0	0	0	0	0	0	0	0	0	0	0	0	0	0	0	0	0	0	0	0	0	0	0	0	0	0	0	0	0	0	0	0	0	0	0	0	0	0.038677238445175	0	0	0	0	0
1667	0.0239808153477218	0	0	0	0	-0.0112044817927171	0	0	0	0	0	0	0	0	-0.0112044817927171	0	0	0	0	0	0	0	0	0	0	0	0	-0.0112044817927171	0	0	0	0	0	0	0	0	0	0	0	0	-0.0112044817927171	0	0	0	0	0	0	0	0
1668	0	0	0	0	0.011386063458327	0	0	0	0.00048803870359809	0	0	0	0	0	0	0	0	0	0	0	0	0	-0.00496097367376637	0	0	-0.00165365789125546	0	0	0	0	0	0	-0.00165365789125546	0	0	0	0	0	0	0	0	0	0	0	0	0	0	0	0
1669	0	0	0	0	0	0	0	0	0	0	0	0	0	0	-0.0112485939257593	0	0	0	0	0	0	0	0	0	0	-0.0112485939257593	0	0	0	0	0	0	0	0	0	0	0	0	0	0	0	0	0	0	0	0	0	0	0
1670	0	0	0	0	0	0	0	0	0	0	0	0	0	0	0	0	0	0	0	0	0	0	0	0	0	0	0	0	0	0	0	0	0	0	0	0	-0.0130548302872063	0	0	0	0	0	0	0	0	-0.0130548302872063	0	0	0
1671	0	0	0	0	0	0	0	0	0	0	0	0	0	0	0	0	0	0	0	0	0	0	0	0	0	0	0	0	0	0	0	0	0	0	0	0	0	0	0	0	0	0	0	0	0	0	0	0.298453049561533	0
1672	0	0	0	0	-0.0212607632614011	0	0	0	0	0	0	0	0	0	0	0	0	0	0	0	0	0	0	0	0	0	0	0	0	0	0	0	0	0	0	0	0	0	0	0	0	0	0	0	-0.0212607632614011	0	0	0	0
1673	0	0.00620770997578993	0	-0.0117240166481036	0	-0.00293100416202591	0	0.00327670581376402	-0.0205170291341814	0	0	-0.00586200832405182	0	0	-0.0117240166481036	-0.00879301248607773	0	0	0.00620770997578993	-0.00586200832405182	0	-0.00293100416202591	-0.00586200832405182	-0.00879301248607773	0	0	0.00034570165173811	0	0	0	0	-0.00293100416202591	0	0.00327670581376402	0	0	0	0	0	0	0	0	0.0124154199515799	-0.0234480332962073	0	0	-0.00586200832405182	0	0
1674	0	0	0	0	0	0	0	0	0	0	0	0	0	0	0	0	0	0	0	0	0	0	0	0	0	0	0	0	0	0	0	0	0	0	0	0	0	0	0	0	0	0	0	0	0	0	0	0	0
1675	0	0	0	0	0	0	0	0	0	0	0	0.0287521564117309	0	0	0	0	0	0	0	0	0	0	0	0	0	0	0	0	0	0.172512938470385	0	0	0	0	0	0	0	0	0	0	0.0575043128234618	0	0	0	0	0.0277268301357021	0	0	-0.009679653654822
1676	0	0	0	0	0	0	0	0	0	0	0	0	0	0	0	0	0	0	0	0	0	0	0	0	0	-0.108616944243302	0	0	0	-0.0951175874845408	0	0	0	-0.108616944243302	0	-0.0362056480811007	0	0.0859106529209622	0	0	0	-0.0362056480811007	0	0	0	0	0	0	0
1677	0	0	0	0	0	0	0	0	0	0	0	0	0	-0.0487092060399415	0	0	-0.0487092060399415	0	0	0	0	0	0.0890471950133571	0	0	0	0	0	0	0	0	0.178094390026714	0	0	0.129385183986773	0	0	0.0890471950133571	0	0	0.0890471950133571	0	0	0	0	0	0	0	0
1678	-0.00810668396092578	0	0	0	0	0	0	0	0	0	0	0	0	0	0	0	0	0	0.000968479933459304	-0.00810668396092578	0.0493664637156492	0	0	0	0	0	0.0088330439110203	0	-0.0324267358437031	0	0	-0.0283733938632402	0	0.0329109758104328	0.230861070639759	0.024804291849507	0	0.0412597797547234	0.0288576338299699	0	0.187305486524865	0.123779339264171	-0.00405334198046289	0.0701174135846932	0.020813647605783	0.0288576338299699	0.00834880394429062	0	0
1679	0	0	0	0	0	0	0	0	0	0	0	0	0	0	0	0	0	0	0	0	0	0	0	0	0	0	0	0	0	0	0	0	0	0	0	0	0	0	0	0	0	0	0	0	0	0	0	0	-0.0133413381362151
1680	0	0	0	0	0	0	0	0	0	0	0	0	0	0	0	0	0	0	0	0	0	0	0	0	0	0	0	0	0	0	0	0	0	0	0	0	0	0	0	0	0	0	0	0	0	0	0	0	0
1681	0	0	0	0	0	0	0	0	0	0	0	0	0	0	0	0	0	0	0	0	0	0	0	0	0	0	0	0	0	0	0	0	0	0	0	0	0	0	0	0	0	0	0	0	0	0	0	0	0
1682	0	0	0	0	0	0	0	0	0	0.056274620146314	0	0	0	0	0	0	0	0	0	0	-0.0258064516129032	0	0	0	0	0.056274620146314	0	0	0	0	0	0	-0.0516129032258065	0	0	0	0	0	0	0	0	0	0	0	0	0	0	0	0
1683	0	0	0	0	0	0	0	0	0	0	0	0	0	0	0	0	0	0	0	0	0	0	0	0	0	0	0	0	0	0	0	0	0	0	0	0	0	0	0	0	0	0	0	0	0	0	0	0	0
1684	0	0	0	0	0	0	0	0	0	0	0	0	0	0	0	0	0	0	0	0	0	0	0	0	0	0	0	0	0	0	0	0	0	0	0	0	0	0	0	0	0	0	0	0	0	0	0	0	0
1685	0	0	0	0	0	0	0	0	0	0	0	0	0	0	0	0	0	0	0	0	0	0	0	0	0	0	0	0	0	0	0	0	0	0	0	0	0	0	0	0	-0.00942329438371655	0	0	0	0	0	0	0	0
1686	-0.0371195248700817	0	0	0	0	0	0	0	0	0	0	0	0	0	0	0	0	0	0	0	0	0	0	0	0	0	0	-0.0371195248700817	0	0	0	0	0	0	-0.0371195248700817	0	0	-0.0371195248700817	0	0	0	0	0	-0.0371195248700817	0	0	0	0	0
1687	0	0	0	0	0	0	0	0	0	0	0	0	0	-0.0039267015706807	0	-0.043630017452007	0	0	0	0	0	0	0	0	0	0	0	0	0	0	0	0	0	0	0	0	0	0	0	0	0	-0.043630017452007	0	0	0	0	0	0	0
1688	0	-0.00682920166632521	0	0	0	0	0	0	0	0	0	0	0	0	-0.0034146008331626	0	0	0	0	0	0	0	0	0	0	0	0	0	0	0	-0.0034146008331626	0	0	0	0	0	-0.0034146008331626	0	0	0	0	0	0	0	0	0	0	0	0
1689	0	0	0.00450037615438401	-0.0049862877088008	0	0	-0.0698080279232112	0	-0.0049862877088008	0	-0.0494168254657894	-0.00997257541760159	0	0	0	0	0	-0.009526523795383	0	0	0	0	0	0	0	0	0	0	0	0	0	0	0	0	0	0	0	0	0	0	0	-0.0049862877088008	0	0	0	0	0	0	0
1690	0	0	0	0	0	0	0	0	0	0	0	0	0	0	0	0	0	0	0	0	0	0	0	0	0	0	0	0	0	0	0	0	0	0	0	0	0	0	0	0	0	0	0	0	0	0	0	0	0
1691	0	0	0	0	0	0	0	0	0	0	0	0	0	0	0	0	0	0	0	0	0	0	0	0	0	0	0	0	0	0	0	0	0	0	0	0	0	0	0	0	0	0	0	0	0	0	0	0	0
1692	0	0	0	0	0	0	0	0	0	0	0	0	0	0	0	0	0	0	0	0	0	0	0	0	0	0	0.063351282863478	0	0	0	0	0	0	0	0	0	-0.0570017100513015	0	0	0.031675641431739	0	0	0.063351282863478	0	0	0	0	0	0
1693	0	0	0	0	0	0	0	0	0	0	0	0	0	0	0	0	0	0	0	0	0	0	0	0	0	0	0	0	0	0	0	0	0	0	0	0	0	0	0	0	0	0	0	0	0	0	0	0	0
1694	0	0	0	0	0	0	0	0	0	0	0	0	0	0	0	0	0	0	0	0	0	0	0	0	0	0	0	0	0	0	0	0	0	0	0	0	0	0	0	0	0	0	0	0	0	0.0102827763496144	0	0.0102827763496144	0
1695	0	0	0	0	0	0	0	0	0	0	0	0	0	0	0	0	0	0	0	0	0	0	0	0	0	0	0	0	0	0	0	0	0	0	0	0	0	0	0	0	0	0	0	0	0	0	0	0	0
1696	0	0	0	0	0	0	0	0	0	0	0	0	0	0	0	0	0	0	0	0	0	0	0	0	0	0	0.116009280742459	0	0	0	0	0	0	0	0	0	0	0	0	0	0	0	0	0	0	0	0	0	0
1697	0	0	0	0	0	0	0	0	0	0	0	0	0	0	0	0	0	0	0	0	0	0	0	0	0	0	0	0	0	0	0	0	0	0	0	0	0	0.0732064421669107	0	0	0	0	0	0	0	0	0	0	0
1698	0	0	0	0	0	0	0	0	0	0	-0.0023470872647045	-0.004694174529409	0.0089664097372188	0	0	0	0	0	0	0	0	0	0	0	0	0	0	0	0	0	0	0	0	0	0	0	0	0	0	0	0	0	0	0	0	0	0	0	0
1699	0	0	0	0	0	0	0	0	0.0235840654677042	0	0	0	0	0	0	0	-0.00995024875621891	0	0	0	0	-0.0199004975124378	0	0	0	0	0	0	0	0	0	0	0	-0.00995024875621891	0	-0.00995024875621891	0	0	0	0	0	0	0	0	0	0	0	0	0
1700	0	0	0	0	0	0	0	0	0	0	0	0	0	0	0	0	0	0	0	0	0	0	0	0	0	0	0	0	0	0	0	0	0	0	0	0	0	0	0	0	0	0	0	0	0	0	0	0	0
1701	0	0	0	0	0	0	0	0	0	-0.0450755014649538	0	0	0	0	0	0	0	0	0	0	0	0	0	0	0	0	0	0	0	0.0319284802043423	0	0	0	0	0	0	0	0	0	0	0	0	0	0	0	0	0	0	0
1702	0	0	0	0	0	0	0	0	0	0	-0.016597510373444	0	0	0	0	0	0	0	0	0	-0.0033195020746888	0	0	0	0	0	0	0	0	0	0	0	0	0	0	0	0	0	0	0	0	0	0	0	0	0	0	0	0
1703	0	0	0	0	0	0	-0.068073519400953	0	0	0	0	0	0	0	0	0	0	0	0	0	0	0	0	0	0	0	0	0	0	0	0	0	0	0	0	0	0	0	0	0	0	0	0	0	0	0	0	0	0
1704	0	0	0	0	0	0	0	0	0	0	0	0	0.00447939586840319	-0.001595328877048	-0.00319065775409601	0	0	-0.00319065775409601	0	0.0108607113765952	0	0	-0.001595328877048	0	0	-0.001595328877048	-0.00319065775409601	0	0.0325821341297855	0	0.00543035568829758	-0.001595328877048	0	0	0	0	0.00543035568829758	0	0	0	0	0	0	0	0.0108607113765952	-0.001595328877048	0	0	-0.00319065775409601
1705	0	0.11350183402326	0	-0.012647021626407	0	0	0	0	0	0	0	-0.025294043252814	0	0	0	0	0	0	0	0	-0.012647021626407	0.036042530185619	0	0	0	0	0.0180212650928095	0	0	0	0	0	0	0	0.036042530185619	0	0	0	0	0	0	0	-0.0037970693872038	0	0	0	0	0.126148855649667	0.0180212650928095
1706	0	0	0	0	0	0	0.0256607646907878	0	0	0	0	0	0	0	0	0	0	0	0	0	0	0	0	0	0	0	0	0	-0.0165289256198347	0	0	0	0	0	0	0	0	0.0513215293815756	-0.0165289256198347	0	0.0256607646907878	0	0	-0.0165289256198347	0	0	0.102643058763151	0	0
1707	0	0	0	0	0	0	0	0	0	0	0	0	0	0	0	0	0	0	0	0	0	0	0	0	0	0	0	0	0	0	0	0	0	0	0.0158077774264938	0	0	0	0	0	0	0.0158077774264938	0	0	0	0	0.0158077774264938	0	0
1708	0	0	0	0	0	0	0	0	0	0	0	0	0	0	0	0	0	0	-0.0209205020920502	0	0	0	0	0	0	0	0	0	0	0	0	0	0	0	0	0	0	0	0	0	0	0	0	0	0	0	0	0	0
1709	0	0	0	0	0	0	0	0	0	0	0	0	0	0	0	0	0	0	0	0	0	0	0	0	0	0	0	0	0	0	0	0	0	0	0	0	0	0	0	0	0	0	0	0	0	0	0	0	0
1710	0	0	0	0	0	0	0	0	0	0	0	0	0	0	0	0	0	0	0	0	0	0	0	0	0	0	0	0	0	0	0	0	0	0	0	0	0	0	0	0	0	0	0	0	0	0	0	0	0
1711	0	0	-0.0663459943605905	0	0	0	0	0	0	0	-0.0165864985901476	0	0.0806573955345598	0	0	0	0	0	0	0.113830392714855	0	0	0	0	0	0	0	0	0.0569151963574274	0	0	0	0	0	0.0569151963574274	0	0	0	0.16131479106912	0	0	0	-0.0165864985901476	0	0	0	0	0	0
1712	0	0	0	0	0	0	0	0	0	0	0	0	0	0	0	0	0	0	0	0	-0.0246244767298695	0	0	0	0	0	0	0	0	0	0	0	0	0	0	0	0	0	0	0	0	0	0	0	0	0	0	0	0
1713	0.269102815033046	0.0264410364886304	0	0.105764145954521	0.589598310165894	0	0.281690772595815	-0.0108742931709439	0	0.0948898527835771	0	0	0.168255390739633	-0.0108742931709439	0.252270950352268	0	0.00663038605293398	0	0	-0.0652457590256633	0	0.121330889272208	-0.0761200521966072	0.0264410364886304	0	-0.0652457590256633	0	0.241172385666957	0	0	0	-0.0326228795128317	0.0528820729772607	0	0	0	0	0	0	0	-0.0108742931709439	-0.0326228795128317	0	0	0	0	0	0	0
1714	0	0	0	0	0	0	0	0	0	0	0	0	0	0	0	0	0	0	0	0	0	0	0	0	0	0	0	0	0	0	0	0	0	0	0	0	0	0	0	0	0	0.0066012465685284	0	0.0141478468251128	0.099487318059988	0.0268817204301075	0	-0.0037733001282922	0
1715	0	0	0	0	0	0	0	0	0	0	0	0	0	0	0	0	0	0	0	0	0	0	0	0	0	0	0	0	0	0	0	0	0	0	-0.16273393002441	0	0	0	0	0	0	0	0	0	0	0	0	0	0
1716	0	0	0	0	0	0	0	0	0	0	0	0	0	-0.00858516483516484	0	0	0	0	0	0	0	0.0209380234505863	0	0	0	0	0	0	0	0	0	0	0	0	-0.00858516483516484	0	0	0	0	0	0	0	0.0628140703517588	0	0	0	-0.00858516483516484	0	0
1717	0	0	0	0	0	0	0	0	0	0	0	0	0	0	0	0	0	0	0	0	0	0	0	0	0	0	0	0	0	0	0	0	0	0	0	0	0	0	0	0	0	0	0	0	0	0	0	0	0
1718	0	0	0.0333611342785655	0	0	0	0	0	0	0	-0.0248241621845263	0	0	0.0166805671392827	0	0	0.0166805671392827	0.12543206775195	0	0.0166805671392827	0	0	0	-0.00827472072817542	0	0	-0.0656732630936761	-0.00827472072817542	0	0	0	0.0668533942400629	0	0	0	0	0	-0.0165494414563508	0	0	0	0	0	0	0	0	0	0	0
1719	0	-0.00514986095375425	0.00678656260604004	0	0	0	0	0	-0.00257493047687712	0	-0.00772479143063137	0	0	0.00421163212916292	0.0135731252120801	0.00678656260604004	0	0.0135731252120801	0	-0.00257493047687712	0	0	0	-0.00257493047687712	0	0.0152098268643659	0	0	0	0	0	-0.00514986095375425	0	0	0	0	-0.00257493047687712	0	0	0	0	0	0	-0.00257493047687712	0	-0.00257493047687712	0	0	-0.0102997219075085
1720	0	0	0	0	0	0	0	0	0	0	0	-0.078740157480315	0	0	0	0	0	0	0	0	0	0	0	0	0	0	0	0	0	0	0	0	0	0	0	0	0	0	0	0	0	0	0	0	0	0	0	0	0
1721	0	0.0777604976671851	0.116640746500778	0	-0.0220264317180617	0	-0.110132158590308	0.0168538171155308	0	-0.066079295154185	0	0	0	0	-0.0220264317180617	0	0.0388802488335925	0.15552099533437	0	0.0388802488335925	0.0337076342310617	0	0.0337076342310617	0	0	0	-0.0440528634361234	0	-0.0440528634361234	0	0	0	0	0	0	0	-0.0220264317180617	0	0	0	0	-0.0220264317180617	0	0	0	0	0	0	0
1722	0	0	0	0	0	0	0	0	0	0	0	0	0	0	0	0	0	0	0	0	0	0	0	0	0	0	0	0	0	0	0	0	0	0	0	0	0	0	0	0	0	0	0	0	0	0	0	0	0
1723	0	0	0	0	0	0	0	0	0	0	0	0	0	0	0	0	0	0	0	0	0	0	0	0	0	0	0	0	0	0	0	0	0	0	0	0	0	0	0	0	0	0	-0.00732225232481511	0	0	0	0	0	0
1724	0	0	0	0.0255427841634738	0	0.0255427841634738	0	0	0.0510855683269476	0	0	0	0	0	0	0	0	0	0.0255427841634738	0	0	0	0	0	0	0	0	0	-0.0358851674641148	0	0	0	0	0	0	0	0	0	0	0	0	0	0	-0.0119617224880383	0	0	0	0	0
1725	0	-0.0904159132007233	-0.180831826401447	0	0	0.193050193050193	0	0	0	0	0	0	0	0	0	0	0.012218366648746	0	-0.0904159132007233	0	0	0	0	-0.0904159132007233	0	0	-0.27124773960217	0.193050193050193	0	0	0	-0.0904159132007233	0	0	0	0	0	0	0	0	0	0	0	0	0	-0.0904159132007233	0	-0.0904159132007233	0
1726	0	0	0	0	0	0.00811951932445599	0.0120841441832314	0	0	0	0.00811951932445599	0	0.016239038648912	0	0	0	0	0	0	0	0	0	0	0	0	0	0	0	0	0	0	0	0	0	0	0	0	0	0	0.0354913541220736	0	0.00811951932445599	0	0	0	0	0	0	0.0317169988702033
1727	0	0	0	0	0	-0.0746825989544436	0	0	0	0	0	0	0	0	0	0	0	0	0	0	0	0	0	0	0	0	0	0	-0.0746825989544436	0	0	0	0	0	0	0	0	0	0	0	0	0	0	0	0	0	0	0	0
1728	0	0	0	0	0	0	0	0	0	0	0	0	0	0	0	0	0	0	0	0	0	0	0	0	0	0	0	0	0	0	0	0	0	0	0	0	0	0	0	0	0	0	0	0	0	0	0	0	-0.0694444444444444
1729	0	0	0	0	0	0	0	0	0	0	0	0	0	0	0	0	0	0	0	0	0	0	0	0	0	0	0	0	0	0	0	0	0	0	0	0	0	0	0	0	0	0	0	0	0	0	0	0	0
1730	0	0	0	0	0	0	0	0	0	0	0	0	0	0	0	0	0	0	0	0	0.0304136253041363	0	0	0	0	0	0	0	0	0	0	0	0	0	0	0	0	0	0	0	0	0	0	0	0	0	0	0	0
1731	0	0	0	0	0	0	0	0	0	0	0	0	0	0	0	0	0	0	0	0	0	0	0	0	0	0	0	0	0	0	0	0	0	0	0	0	0	0	0	0	0	0	0	0	0	0	0	0	0
1732	0	0	0	0	0	0	0	0	0	0	-0.171086398631309	0	0	0	-0.0855431993156544	0	0	0	0	-0.0855431993156544	0	0	0	0	0	0	0.164744645799012	0	-0.0855431993156544	0	0	0	0	0	0	-0.0855431993156544	0	0	0	0	0	0	0	0	0	0	0	0	0
1733	0	0	0	0	0	0	0	0	0	0	0	0	0	0	0	0	0	0	0	0	0	0	0	0	0	0	0	0	0	0	0	0	0	0	0	0	0	0	0	0	0	0	0	0	0	0	0	0	0
1734	0.0531537916371368	0	0	0	0	0.0177179305457123	0	0	0	0	-0.00394773202794994	0	0	0	0	0	0	0	0	0	0	0	0	0	0	0	0	0	0	0	0	0	0	0	0	0	0	0	0	0	0	0.0177179305457123	0	0	0	0	0	0	0
1735	0	-1.50080749309059	-0.0437732545414752	0	-0.120601239281208	0	0	0	0	0	0	0	0	0	0	0	-0.0218866272707376	0	0	0	0	0	0	-0.0218866272707376	0	-0.0218866272707376	0	0	0	0	0	0	0	-0.131319763624425	0	0	-0.0437732545414752	0	0	-0.0437732545414752	0	0	0	0	0	0	0	0	0
1736	-0.0291630212890055	0	0	0	0	0	-0.0291630212890055	-0.0874890638670166	0	-0.0291630212890055	0.0426985482493595	0	-0.0583260425780111	0	0	0	0	0	0	0	-0.0291630212890055	0	0	0	0	-0.0583260425780111	0	-0.0583260425780111	-0.0874890638670166	-0.0291630212890055	0	0	0	0	0	0	0	0	0	0	0	0	0	0	0	-0.0291630212890055	0	0	0
1737	0	0	0	0	0	0	0	0	0	0	0	0	0	-0.0335908632851864	0	0	0	0	0	0	0	0	0	0	-0.0335908632851864	0	0	0	0	0	0	0	0	0	0	0	0	0	0	0	0	0	0	0	0	0	0	0	0
1738	0	0	0	0	0	0	0	0	0	0	0	0	0	0	0	0	0	0	0	0	0	0	0	0	0	0	0	0	0	0	0	0	0	0	0	0	0	0	0	0	0	0	0	0	-0.109210047324354	0	0	0	0
1739	0	0	0	0.339981273087876	0	0	0.189795754186337	0	0	0	-0.0237661411708786	0	0	0	0	0	0	-0.00792204705695952	0	0	0	0	0	0	0	0	0	0	0	0	0	0	0	0	0	0	0	0	0	0	0	0	0	0	0	0	0	0	0
1740	0	0	0	0	0	0	0	0	0	0	0	0	0	0	0	0	0	0	0	0	0	0	0	0	0	0	0	0	0	0	0	0	0	0	0	0	0	0	0	0	0	0	0	0	0	0	0	0	0
1741	0	0	0	0	0	0	0	0	0	0	0	0	0	0	0	0	0	0	-0.0309789343246592	-0.0619578686493185	0	0	0	0	0	0	0	0	0	0	0	0	0	0	0	0	0	0	0	0	0	0	0	0	0	-0.0309789343246592	0	0	0
1742	0.20099439331429	-1.77336680034236	1.31752305665346	0.5904811363396	-1.80894953982863	0.29620226383159	1.61661040747045	0.86071761730283	-1.30117423040305	0.114441783753114	0.00961695661790801	0.204841175961455	0.00961695661790801	0.568362136118404	0	0.073088870296106	0.236577132800553	-0.085590913899388	-0.344287046921132	-0.571247223103777	-0.761662964138369	-0.26638969831607	0.32409143802352	0.314474481405614	-0.026927478530145	-0.380831482069184	0.114441783753114	-0.0317359568390987	0.236577132800553	-0.212534741255783	-0.239462219785927	0.228883567506224	-0.202917784637873	-0.12021195772386	0.0961695661790798	0.80590096458075	-1.23577892540127	-1.1376859678986	0.3481338295683	1.09729475010339	0.741467355240758	-0.334670090303223	0.47026917861574	-0.00288508698537204	-0.283700220228306	-0.0692420876489401	-0.539511266264678	-1.00593366223325	-0.556821788176914
1743	0	0	0.131492439184747	0	0	0	0	0	0	0	0	0	0	0	0	0	0	0	0	0	0	0	0	0	0	0	0	0	0	0	0	0	0	0	0	0	0	0	0	0	0	0	0	0	0	0	0	0	0
1744	0	0	0	0	0	0	0	0	0.0538694859546062	0	0	0	0	0	0	0	0	0	0	0	0	0	0	0	0	0	0	0	0	0	0	0.0265216814746055	0	0	0	0	0	0	0	0	0.0078696048767443	0	-0.0124347177319075	0	0	0	0	0.00704348187134896	0
1745	0	0	0	0	0	0	0	0	0	0	0	0	0	0	0	0	0	0	0	0	0	0	0	0	0	0	0	0	0	0	0	0	0	0	0	0	0	0	0	0	0	0	0	0	0	0	0	0	0
1746	0	0	0	0	0	0	0	0	0	0	0	0	0	0	0	0	0	0	0	0	0	0	0	0	0	0	0	0	0	0	0	0	0	0	0	0	0	0	0	0	0	0	0	0	0	0	0	0	0
1747	0	0	0	0	0	0	0	0	0.0591715976331361	0	0	0	0.0591715976331361	0	-0.0760167236792094	0	0	0	-0.109706975771356	0	0	0	0	0	0	0	0	0	0	0	0	0	0.118343195266272	0	0	0.118343195266272	0	0	0	0	0	0	0	0	0	0	0	0	0
1748	0	0	0	0	0	0	0	0	0	0	0	0	0	0	0	0	0	0	0	0	0	0	0	0	0	0	0	0	0	0	0	0	0	0	0	0	0	0	0	0	0	0	0	0	-0.011832919181162	0	0	0	0
1749	0	0	0	0	0	0	0	0	0	0	0	0	0	0	0	0	0	0	0	0	0	0	-0.0168548794876117	0	0	0	0	0	0	0	0	0	0	0	0	0	-0.0337097589752233	0	0	0	0.160320641282565	0	0	0	0	0	0	0	0
1750	-0.0469704086425552	2.74891403531258	0.256629597946963	0.655737441442682	0	0	1.0965521148537	0	-0.234852043212776	0	0	0	0	0	0	-0.0469704086425552	0	0	0.0855431993156544	0	-0.008397617969456	0	0	-0.0553680266120116	0	0	0	0	-0.0469704086425552	0	0	0	0	0	-0.0469704086425552	0	0	0	0	0	0	0	0	0	0	0	0	0	0
1751	0.00764610213916197	0.019886221423948	-0.0484926856865756	-0.00808211428109593	0	0	0	0	-0.00808211428109593	0.0144201799944562	0.0705589678201938	-0.0166002407041258	0.0696869435363263	0	-0.0161642285621919	0	-0.0013080364258018	0.00110592001015297	0.02337431855942	-0.0161642285621919	-0.0502367342543112	-0.0085181264230299	-0.00808211428109593	0	0	-0.00808211428109593	0	-0.0093901507068977	0	-0.279588019118535	-0.00808211428109593	0.0471846492607738	0	0	-0.00808211428109593	-0.0161642285621919	-0.00808211428109593	-0.0161642285621919	-0.0893392692339891	-0.0161642285621919	-0.129313828497535	-0.00808211428109593	0	0.0157282164202579	0	-0.177806514184111	-0.0161642285621919	-0.0493647099704435	0
1752	-0.0105887335874629	0	0	0	0	0	0	-0.0105887335874629	0	-0.0105887335874629	0	0	0	0	0	-0.0105887335874629	0	0	0	0	-0.0105887335874629	0	0	0	0	0	0	0	0	0	0	0	-0.0105887335874629	0	0	0	0	0	0	0	0.0098653470016146	0	0	0	0	0	0	0	0
1753	0	0	0	0	0	0	0	0	0	0	0	0	0	0	0	0	0	0	0	0	0	0	0	0	0	0	0	0	0	0	0	0	-0.0695410292072323	0	0	0	0	0	0	0	0.0647458724506313	0	0	0	0	0	-0.0231803430690774	0	0
1754	-0.00299204117048651	0	0	0	0	0	0	0	-0.00598408234097301	0	0	0	0.0617346655067332	0	0	0	0	0	0	0	0	0	-0.011968164681946	-0.00299204117048651	0.0147405660377358	0	0	0	0	0	0	0	0	0	-0.00897612351145952	0	0	0	0	0	0	0	0	0	0	-0.00598408234097301	0	0	0
1755	0	0	0.08424599831508	0	0	0	0	0	0	0	0	0	0	0	0	0	0	0	0	0	0	0	0	0	0	0	0	0	0	0	0	0	0	0	0	0	0	0	0	0	0	-0.038109756097561	0	0	0	0	0.04212299915754	0	0
1756	0	0	0	0	0	0	0	0	0	0	0	0	0	0	0	0	0	0	0	0	0	0	0	0	0	0	0	0	0	0	0	0	0	0	0	0	0	0	0	-0.0602409638554217	0	0	0	0	0	0	0	0	0
1757	0	0	0	0	0	0.0420698359276399	0	0	0	0.0210349179638199	0	0	0	0	0.303275279200117	0	0	0	0	0	0.130602721636239	0	0	0.0210349179638199	0	0	0	0	0.1051745898191	0	0.0464630497809589	0	0	0.420698359276399	0	0	0.862431636516618	0.0591771156895284	0	0	0.256812229419158	0.0337489838723894	0	0.316454920760074	0.0127140659085694	1.25342766946201	-0.00832085205525046	0.0210349179638199	0.139854724994264
1758	0	0	0	0	0	0	0	0	0	0	0	0	0	0	0	0.0325626831650928	0	0	-0.00679578661230037	0	0	0	0	0	0	0	0	0	0	0	0	0	0	0	0	0	0	0	0	0	0	0	0	0	0	0	0	0	0.0162813415825464
1759	0	0	0	0	0	0.0336360578540195	0	-0.0469851213782302	-0.0156617071260767	0	0	0	0	0	0	0	0	0	0	0	0	0	0	0	0	0	0	0	0	0	0	0	0	0	0	0	0	0	0	0	0	0	0	0.067272115708039	0.100908173562059	0	0.002312643601866	2.10835657171394	0.002312643601866
1760	0	-0.0687369085350525	0	0	0.00248431890365489	0	0	-0.0105293637631946	0	-0.0131617047039933	0.0178342984370155	0	0	-0.0052646818815973	0	0	0	0	0	0	0	0	0	-0.00263234094079865	0	0	0	0	0	0	0	0	0	0.0102333196889071	0	0	0	0	0	0	0	0	0	-0.00263234094079865	0	0	0	0	0
1761	0.0079846694346854	0	0	0	0	0.0958160332162249	0.0122840351449945	0	-0.097967579688939	0	0	0	0.0282533740143653	0	0	0	0.082917004276518	0.0159693388693708	-0.172900846339551	0.0122840351449945	0	0.0079846694346854	0.0703264040429468	-0.00583498657953087	-0.305264283519743	0	0.0079846694346854	0	0	0	0.021189331654189	0	0	0.0239540083040562	-0.00583498657953087	0	0	0	-0.0211902634629689	0	0	0	0	-0.047908948416893	0	0	-0.0798476261556344	-0.00583498657953087	0
1762	0	0	0	0	0	0	0	0	0	0	0	0	0	0	-0.0683526999316473	0	0	0	0	0	0	0	0	0	0	0	0	0	0	0	0	0	0	0	0	0	0	0	0	0	0	0	0	0	0.0725689404934688	0	0	0	0
1763	0	0	0	0	0	0	-0.0395413206801107	0	0	0	0	0	0	0	0	0	0	0	0	0	0	0	0	0	0	0	0	0	0	0	0	0	0	0	0	0	0	0	0	0	0	0	0	0	0	0	-0.0395413206801107	0	0
1764	0	0	0	0	0	0	0	0	0	0	0	0	0	0	0	0	0	0	0	0	0	0	0	0	0	0	0	0	0	0	0	0	0	0	0	0	0	0	0	0	0	0	0	0	0	0	0	0	0
1765	0	0	0	0	0	0	0	0	0	0	0	0	0	0	0	0	0	0	0	0	0	0	0	0	0	0	0	0	0	0	0	0	0	0	0	0	0	0	0	0	0	0	0	0	0	0	0	0	0
1766	0	0	0	0	0	0	0.0312205791587823	0	0	-0.714455822814956	0	0	0	0	0	-0.0238151940938319	0	0	-0.0714455822814956	0	0	0	0	0.0148107701299005	0	-0.0238151940938319	0	0	0	0	0	0	0	0	0	0.0312205791587823	0	0	0	0	0	0	0	0	0	0	0	0	0
1767	0	0	0	0	0	0	0	0	0	0	0	0	0	0	0	0	0	0	0	0	0	0	0	0	0	0	0	0	0	0	0	0	0	0	0	0	0	0	0	0	0	0	0	0	0	0	0	0	0
1768	0	0	0	0	0	0	0	0	0	0	0	0	0	0	0	0	0	0	0	0	0	0	0	0	0	0	0	0	0	0	0	0	0	0	0	0	0	0	0	0	0	0	0	0	0	0	0	0	0
1769	0	0	0	0	0	0	0	0	0	0	0	0	0	0	0	0	0	0	0	0	0	0	0	0	0	0	0	0	0	0	0	0	0	0	0	0	0	0	0	0	0	0	0	0	0	0	0	0	0
1770	0	0	0	0	0	0.0102685218462802	0	0	0	-0.0021421074052653	0	-0.0021421074052653	0	0	0	0	-0.0021421074052653	0	0	0	0	0	0	-0.0021421074052653	0	0	0	0	0	0	0	0	0	-0.0021421074052653	0	-0.0042842148105306	0	0	0	0	-0.0021421074052653	-0.0064263222157959	0	0	0	0.0102685218462802	-0.0021421074052653	0	0
1771	0	0	0	0	0	0	0	0	0	0	0	0	0	0	0	0	0.0573535386393762	0	0	0	0	0	0	0	0	0	0	0	0	0	0	0	0	0	0	0	0	0	0	0	0	0	0	0	0	0	0	0	0
1772	0	0	0	0	0	-0.0343760742523204	0.0859870112877925	0.130704003210004	0.092880956401054	0	0.120363085540113	-0.0229173828348803	0.0447169919222116	-0.0572934570872006	0.105457421566043	0.0676343747570919	0	-0.0229173828348803	-0.0114586914174401	-0.0343760742523204	0.0412700193655813	0	0.0034469725566304	0	0	-0.0572934570872006	0	0	0	0	0	0	0	0	0	0	0	0	0	0	0	0	0	0	0	0	0	0	0
1773	0	0	0	0	0	0	0	0	0	0	0	0	0	0	0	0	0	0	0	0	0	0	0	0	0	0	0	0	0	-0.0123839009287926	0	0	0	0	0	0	0	0	0	0	0	0	0	0	0	0	0	0	0
1774	0	0	0	0.0288596693693737	0	0	0	0	0	0	0	0	0	0	0	0	0	0	0	0	0	0	0	0	0	0	0	0	0	0	0	0	0	0	0	0.0121665719651504	0	-0.00905305087814593	0	0	0	0	0	0.00382002326303871	0	0	0	0	-0.0135795763172189
1775	0	0	0	0	0	0	0	0	0	0	0	0	0	0	0	0	0	0	0	0	0	0	0	0	0	0	0	0	0	0	0	0	0	0	0	0	0	0	0	0	0	0	0	0	0	0	0	0	0
1776	0	0	0	0	0	0	0	0	0	0	0	0	0	0	0	0	0	0	0	0	0	0	0	0	0	0.1953125	0	0	0	0	0	0	0	0	0	0	0	0	0	0	0	0	0	0	0	0	0	-0.181983621474067	0
1777	0	0	0	0	0	0	0	0	0	0	0	0	0	0	0	0	0	0	0	0	0	0	0	0	0	0	0	0	0	0	0	0	0	0	0	0	0	0	0	0	0	0	0	0	0	0	0	0	0
1778	0	0	-0.0209424083769634	0	-0.0418848167539267	-0.12565445026178	-0.0209424083769634	0	0	0	0.0104060227636541	0	0	0	-0.12565445026178	-0.0209424083769634	0	-0.0209424083769634	0.18308311973636	0	-0.0209424083769634	0	0	0	0	0	0	0	0	0	0.0366166239472721	0	0	0	-0.0943060191211629	0	0	-0.0418848167539267	0	-0.06282722513089	0	0	0	0	0	0	0	-0.104712041884817	-0.0209424083769634
1779	0	0	0	0	0	0	0	0	0	0	0	0	0	0	0	0	0	0	0	0	0	0	0	0	0	0	0	0	0	0	0	0	0	0	0	0	0	0	0	0	0	0	0	0	0	0	0	0	0
1780	0	0	0	0	0	0	0	0	0	0	0	0	0	0	0	0	0	0	0	0	0	0	0	0	0	0	0	0	0	0	0	0	0	0	0	0	0	0	0	0	0	0	0	0	0	0	0	0	0
1781	0	0	0	0	0	0	0	0	0	0	0	0	0	0	0	0	0	0	0	0	0	0	0	0	0	0	0	0	0	0	0	0	0	0	0	0	0	0	0	0	0	0	0	0	0	0	0	0	0
1782	0	0	0	0	0	0	0	0	0	0	0	0	0	0.036101083032491	0	0	0	0	0	0	0	0	0	0	0	0	0	0	0	0	0	0	0	0	0	0	0	0	0	0	0	0	0	0	0	0	0	0	0
1783	0	0	0	0	0	0	0	0	0	0	0	0	0	0	0	0	0	0	0	0	0	0	0	0	0	0	0	0	0	0	0	0	0	0	0	0	0	0	0	0	0	0	0	0	0	0	0	0	0
1784	0	0	0	0	0	0	0	0	0	0	0	0	0	0	0	0	0	0	0	0	0	0	0	0	0	0	0	0	0	0	0	0	0	0	0	0	0	0	0	0	0	0	0	0	0	0	0	0	0
1785	0	0.244803807451397	0.163202538300931	0.170648464163823	0	0	0	0	0	0	-0.0890471950133571	0	0	0	0	0	0	0	0	0	0	0	0	0	0	0	0	0	0	0	0	0	0	0	0	0	0	0	0	0	0	0	0	0	0	0	0	0	0
1786	0	0	0	0	0	0	0	0	0	0	0	0	0	0	0	0	0	0	0	0	0	0	0	0	0	0	0	0	0	0	0	0	0	0	0	0	0	-0.178306092124814	0	0	0	0	0	0	-0.0297176820208024	0	0	-0.0594353640416048	0
1787	0	0	0	0	0	0	0	0	0	0	0	0	0	0	0	0	0	0	0	0	0	0	0	0	0	0	0	0	0	0	0	0	0	0	0	0	0	0	0	0	0	0	0	0	0	0	0	0	0
1788	0	0	0	0	0	0	0	0	0	0	0	0	0	0	0	0	0	0	0	0	0	0	0	0	0	0	0	0	0	0	0	0	0	0	0	0	0	0	0	0	0	0	0	0	0	0	0	0	0
1789	0	0	0	0	0	0	-0.0089814981138854	0	0	0	0	0	0	0	0	0	0	0	0	0	-0.0089814981138854	0	0	0	0	0	0	0	-0.0043704992860826	0	0	0	0	0	0	0	0	0	0	0	0	0	0	-0.0089814981138854	0	0	0	0	0
1790	0	0	0	0	0	0	0	0	0	0	0	0	0	0	0	0	0	0	0	0	0	0	0	0	0	0	0	0	0	0	0	0	0	0	0	0	0	0	0	0	0	0	0	0	0	0	0	0	0
1791	0	0	0	0	0	0	0	0	0	0	0	0	0	0	0	0	0	0	0	0	-0.00496130184560429	0	0	0	0	0	0	0	0	0	0	0	0	0	0	0	0	0	0	0	0	0	0	0	0	0	0	0	0
1792	0	0	0	0	0	0	0	0	0	0	0	0	0	0	0	0	0	0	0	0	0.134408602150538	0	0	0	0	0	0	0	0	0	0	0	0	0	0	0	0	0	0	0	0	0	0	0	0	0	0	-0.0720980533525595	0
1793	0	0	0	0	0	0	0	0	0	0	0	0	0	-0.0273261374504714	0	0	0	0	0	0	0	0	0	0	0	0	0	0	0	0	0	0	0	0	0	0	0	0	0	0	0	0	0	0	0	0	0	0	0
1794	0	0	0	0.0601865783930184	0	0	0	0	0	0	0.0300932891965092	0	0.0601865783930184	0	0.0300932891965092	0	0	0	0	0	0.0300932891965092	-0.036231884057971	-0.0181159420289855	0	0	0	0	0	0	0	0	0	0	0	0	0	0	0	0	0	0	0	0	0	0	0	0	0	0
1795	0	0	0	0	0	0	0	0	0	0	0	0	0	0	0	0	0	0	0	0	0	0	0	0	0	0	0	0	0	0	0	0	0	0.153491941673062	0	0	0	0	0	0	0	0	0	0	0	0	0	0	0
1796	0	0	-0.0133689839572193	0	0	0	0	0	0	0	0	0	0	0	0	0	0	0	0	0	0	0	0	0	0	0	0	0	0	0	0	0	0	0	0	0.0346386972717773	0	0	0	0	0	0	0	0	0	0	0	0	0
1797	0	0	0	0	0	0	0	0	0	0	0	0	0	0	0	0	0	0	0	0	0	0	0	0	0	0	0	0	0	0	0	0	0	0	0	0	0	0	0	0	0	0	0	0	0	0	0	0	0
1798	0	0.438698883311933	0	0	0	0	0	0	0	0	0	0	0	0.0776234387767011	0	0	0	0	0.128205128205128	0	0	0.256410256410256	0	0	0	-0.07412162950858	0	0	0.205828566981829	0	0	-0.151745068285281	0	0	0	0	0	0	0	-0.101163378856854	0	0	0	-0.0505816894284269	-0.023539940080153	0	0	0.384615384615385	0
1799	0	0	0	0	0	0	0	0	0	0	0	0	0	0	0	0	0	0	0	0	0	0	0	0	0	0	0	0	0	0	0	0	-0.00729067248954365	0	0	0	0	0	0.00893255917820455	-0.0162232316677482	0	0	0	0	0	0	0	0	0
1800	0	0	0	0	0	0	0	0	0	0	0	0	0	0	0	0	0	0	0	0	0	0	0	0	0	0	0	0	0	0	0	0	0	0	0	0	0	0	0	0	0	0	0	0	0	0	0	0	0
1801	-0.0978792822185971	0	-0.065252854812398	0.093955851074814	0	0	0	0	0	0	0.0632911392405063	-0.032626427406199	0	0	0	0	0	0	0	0.0632911392405063	0	0	0	0	0	0	0	0	0	0	0.0632911392405063	0	-0.065252854812398	0	0	0	0	-0.032626427406199	0	0	0	-0.032626427406199	0	0	0	0	0	0	0
1802	0	0	0	0	0	0	0	0	0	0	0	0	0	0	0	0	0	0	0	0	0	0	0	0	0	0	0	0	0	0	0	0	0	0	0	0	0	0	0	0	0	0	0	0	0	0	0	0	0
1803	0	0	0	0	0	0	0	0	0	0	0	0	0	0	0	0	0	0	0	0	0	-0.0642880102860817	0	0.0607348921955664	0	0	0	0	0	0	0	0	-0.0160720025715204	0	0	0	0	0	0	0	0	0	0	0	0	0	0	0	0
1804	0	0	0	0	0	-0.087260034904014	0	0	0	0	0	0	0	0	0	0	0	0	0	0	0	0	0	0	0	0	0	0	0	0	0	0	0	0	0	0	0	0	0	0	0	0	0	0	0	0	0	0	0
1805	0	0	0	0	-0.0883782589482987	0.0826446280991736	0	0	0	0.534323267220066	-0.0883782589482987	0.0826446280991736	0	0	-0.00573363084912511	0	0.661157024793388	-0.00573363084912511	0	0	0.80015192295753	0	0	-0.0441891294741494	0.407489509646742	0	0.63080895322891	-0.132567388422448	0	0.165289256198347	0	0.495867768595041	0	0.165289256198347	0.0384554986250242	0.340365856776093	-0.1113127823448	0.0826446280991736	0	0	0	0	2.12819960339343	0	0.363300380172593	0	0.247933884297521	0.328898595077843	0.0384554986250242
1806	0	0	0	0	0	0	0	0	0	0	0	0	0	0	0	0	0	0	0	0	0	0	0	0	0	0	0	0	0	0	0	0	0	0	0	0	0	0	0	0	0	0	0	0	0	0	0	0	0
1807	0.0176646925495358	0	0.0173429845726402	0	0.0687285223367698	-0.0170212765957447	0	0	0	0	0	0	0	0	0	0	0	-0.0170212765957447	0	0	0	-0.0170212765957447	0	0	0	0	0	0	0	0	0	0	0	0	0	0	0	0	0	0	0	0	0	0	0	0.0687285223367698	-0.051063829787234	0	0
1808	0	0	0	0	0	0	0	0	0	0	0	-0.0250501002004008	0	0	0	-0.0250501002004008	0	0	0	0	0	0	0	0	0	0	0	0	-0.0250501002004008	0	0	0	0	0	0	0	-0.100200400801603	0	-0.0501002004008016	0.0197126571854542	0	-0.0250501002004008	0	0	0	-0.0250501002004008	0	-0.0250501002004008	0
1809	0.161290322580645	-0.0452079566003617	0	0.0806451612903226	0	0	0	0	0	0	0	0	0	0	0	0	0	0	0	0	0	0	0	0	0	0	0	0	0	0	0	0	0	0	0	0	0	-0.0904159132007233	0	0	0	0	0	0	0	0	0	0	0
1810	0	0	0	0	0	0	0	0	0	0	0	0	0	0	0	0	0	0	0	0	0	0	0	0	0	0	0	0	0	0	0	0	0	0	0	0	0	0	0	0	0	0	0	0	0	0	0	0	0
1811	-0.00371650499869922	0	0	0	0.0094535829079221	0	0	0	0	0	0	0	0	0	0	0	0	0	0	0	0	0	0	0	0	0	0	0	0	0	0	0	0	0	0	0	0	0	0	0	0	0	0	0	0	0	0	0	0
1812	0	0	0	0	0	0	0	0	0	0	0	0	0	0	0	0	0	0	0	-0.0100664384940608	0	0	0	-0.0201328769881216	0	0	0	0.0167224080267559	0	0.0167224080267559	0	0	0	0	0.0066559695326951	0.100334448160535	0	0	0	-0.0201328769881216	0	0	0	-0.0237083143395238	0	0	0	0	0
1813	0	0	0	0	0	0	-0.0679809653297077	0.161420500403551	0	0	0	0	0	0	0	0	0	0	0	0	0	0	0	0.242130750605327	0	0	0	0.161420500403551	0	0	0	-0.0552516804576394	0	-0.505659868021458	-0.135961930659415	0	0	0	0	0	0	-0.32717554177647	0	0	0	0	0	0	-0.0679809653297077
1814	0	-0.0291403593977659	0	0	-0.017229127148371	0	0.0313381385145722	0	0	0	-0.0194269062651773	0	0	-0.00971345313258863	0	0	0	0	0	-0.0194269062651773	0	0	0	0	0	-0.00971345313258863	0	0	0	0	0	-0.0194269062651773	0	0.00595561612469747	0	0	0	0	0	0.0156690692572861	0	0	0	0	0	0	0	0.0313381385145722	0
1815	0	0	0	0	0	0	0	0	0	0	0	0	0	0	0	0	0	0	0	0	0	0	0	0	0	0	0	0	0	0	0	0	0	0	0	0	0	0	0	0	0	0	0	0	0	0	0	0	0
1816	0	0.0065837118967674	0	0	0	0	0	0	0	0	0	0	0	0	0.0065837118967674	-0.00466657333519996	0	0	0	0	0	0	0	0	0	0	0	0	-0.0071634619713952	0	0.0235854128134371	0	0.0131674237935348	0	0	-0.0008322962120651	0	0	0	-0.0279994400111998	0	0	0	-0.00466657333519996	0	0	0	0	0
1817	0	0	0	0	0	0.0130650640188137	0	0	0	0	0	0.0130650640188137	0	0	0.0391951920564411	0	0.0176884599640161	0	0.0130650640188137	0	0.0876371760032873	0	0	0	0	0.0353769199280321	0	0.0653253200940685	0.162050469043073	0.00462339594520235	0	-0.003818272128409	0.0522602560752548	0	-0.025325004220834	0	0	0	-0.00844166807361135	0	0	0	0	0.0661304439108618	0	0	0	0	0
1818	0	0	0	0	0	0	0	0	0	0	0	0	0	0	0	0	0	0	0	0	0	0	0	0	0	0	0	0	0	0	0	0	0	0	0	0	0	0	0	0	0	0	0	0	0	0	0	0	0
1819	0	0	0	0	0	0	0	0	0	0	0	0	0	0	0	0	0	0	0	0	0	0	0	0	0	0	0	0	0	0	0	0	0	0	0	0	0	0	0	0	0	0	0	0	0	0	0	0	0
1820	0	0	0	0	0	0	0	0	0	0	0	0	0	-0.0465766185374942	0	0	0	0	0	0	0	0	0	0	0	0	0	0	0	0	0	0	0	0	0	0	0	0	0	0	0	0.266311584553928	0	0	0	0	0	0	0
1821	0	0	0	0	0	0	0	0	0	0	0	0	0	0	0	0	0	0	0	0	0	0	0	0	0	0	0	0	0	0	0	0	0	0	0	0	0	0	0	0	0	0	0	0	0	0	0	0	0
1822	0.114775457145434	0	0.053098687703861	4.25392252862772	0.442938220029185	1.39162634956858	0.517730750919695	0.452226126903208	0.324689820876994	0.236360434527609	1.46170066044194	-0.735417683223503	-6.5343839787806	0.102377522619218	0.001134920039457	-0.0084357166211286	-0.0716705005587	-1.14419144264655	-0.0336025018145343	-0.00879062918928422	0.00319021222019518	0.0025525698654767	-2.56423496973072	-0.0060255118722346	0	0.00857808173771143	-0.294768807627584	0.00319021222019518	0.0019851098457483	-0.00659297189196317	-0.009003176640857	-0.0717426833402935	0.00319021222019518	0	-0.00659297189196317	-0.00340275967176801	-0.309939861257259	0.023749135367386	-0.0131859437839263	-0.0495535629155101	-0.0221891204247833	0.00758552681483729	0.0205589231471908	-0.0263718875678527	-0.0287820923167465	0.00099255492287412	-0.0175812583785684	0.0129733963323535	0.0343123269508456
1823	0	0	0	0.0402090872537193	-0.0578034682080925	0	0.0611503517714079	0	0.0402090872537193	0.120627261761158	0	0	0	-0.0192678227360308	0	0.0402090872537193	0	0	-0.0192678227360308	0	0	0	0	0	0	0	0	0	0	0	0	-0.0192678227360308	0	0	0	0	0	0	0	0	0	0	0	0	0	0	0	0	0
1824	0	0	0	0	0	0	0	0	0	0	0	0	0	0	0	0	0	0	0	0	0	0	0	0	0	0	0	0	0	0	0	0	0	0	0	0	0	0	0	0	-0.0496894409937888	0	0	0	0	0	0	0	0
1825	0	0	0	0	0	0	0	0	0	0	0	0	0	0	0	0	0	0	0	0	0	0	0	0	0	0	0	0	0	0	0	0	0	0	0	0	0	0	0	0	0	0	0	0	0	0	0	0	0
1826	0	0	0	0	0	0	0	0	0	0	0	0	0	0	0	0	0	0	0	0	0	0	0	0	0	0	0	0	0	0	0	0	-0.0121094696052313	0	0	-0.0242189392104626	0	0	0	0	0	0	0	0	0	0	0	0	0
1827	0	0	0	0	0	0	0	0	0	0	0	0	0	0	0	0	0	0	0	0	0	0	0	0	0	0	0	0	0	-0.0157331655129012	0	0	0	0	0	0	0	0	0	0	0	0	0	-0.0471994965387036	0	0	0	0	0
1828	0	0	0	0	0	0	0.0916590284142988	0	0.0458295142071494	0	0	0	0	0	0.0458295142071494	0	0	0	0	0	0	0	0	0	0	0	0	0	0	0	0	0	0	0	0	0	0	0	0	0	0	0	0	0	0	0	0	0	0
1829	0	0	-0.0334840113845639	0	0.0315955766192733	-0.0167420056922819	0	0	0	0	-0.0334840113845639	0	0	0	-0.0167420056922819	0	0	0	0	-0.0334840113845639	0.0631911532385466	0	-0.0334840113845639	0	-0.0334840113845639	0	0	-0.0167420056922819	0	0	0	0	0.0315955766192733	0	0	-0.0334840113845639	0	0	0	0	0	0	0	-0.0334840113845639	0	0	0	0	0
1830	0	0	0	0	0	0	0	0	0	0	0	0	0	0	0	0	0	0	0	0	0	0	0	0	0	0	0	0	0	0	0	0	0	0	0	0	0	0	0	0	0	0	0	0	0	0	0	0	0
1831	0	0	0	0	0	0	-0.335088559119196	0	0	0	0	0	0	0	0	0	0	0	0	0	0	0	0	0	0	0	0	0	0	0	0	0	0	0	0	0	0	0	0	0	0	0	0	0	0	0	0	0	0
1832	0	0	0	0	0	0	-0.0213401621852326	0	0	0	0	0	0	0	0	0	0	0	0	0	0	0	0.062992125984252	0	0	0	0	0	0	0	0	0	0	0	0	0	0	0	0	0	0	0	0	0	0	0	0	0	0
1833	0	0	0	0	0	0	0	0	0	0	0	0	0	0	0	0	0	0	0	0	0	0	0	0	0	0	0	0	0	0	0	0	0	0	0	0	0	0	0	0	0	0	0	0	0	0	0.0478240076518412	0	0
1834	0	0	0	0	0	0	0	0	0	0	0	0	0	0	0	0	0	0	0	0	0	0	0	0	0	0	0	0	0	0	0	0	0	0	0	0	0	0	0	0	0	0	0	0	0	0	0	0	0
1835	-0.0105462982493145	-0.021092596498629	0	0	-0.021092596498629	0	-0.0105462982493145	0.0317894764786317	0	0	0	0	0	0	0	0	0	0	0	0	0	0	0	0	0	0	0	0	0.0528820729772607	0	0	-0.0105462982493145	0	0	0	0	0	-0.0105462982493145	0.0528820729772607	0	0.0528820729772607	0.0264410364886304	-0.0105462982493145	0	0	0	0	0	0.0528820729772607
1836	0	0.120192307692308	0	0	0.360576923076923	0	-0.0421052631578947	0	0.120192307692308	-0.126315789473684	-0.0421052631578947	0.360576923076923	0	0	0	0	-0.0421052631578947	0.120192307692308	0	0	0	-0.0842105263157895	-0.0421052631578947	0	0	-0.0842105263157895	0	0	0	0.120192307692308	0.156174089068826	-0.210526315789474	-0.0421052631578947	-0.126315789473684	0	-0.0842105263157895	0	0	0.107945344129555	0	0.120192307692308	0.360576923076923	0	0	0.480769230769231	0	0	0.156174089068826	0.49838056680162
1837	0	0	0	0	0	0	0	0	0	0	0	0	0	0	0	0	0	0	0	0	0	0	0	0	0	0	0	0	0	0	0	0	0	0	0	0	0	0.0353200883002208	0	0	0	0	0	0	0	0.00883002207505519	0	0	0
1838	0	0	0	0	0	-0.00797130330809087	0	0	0	0	0	0	0	0	0	0	0	0	0	0	0	0	0	0	0	0	0	0	0	0	0	0	0	0	0	0	0	0	0	0	0	0	0	0	0	0	0	0	0
1839	0	0	0	0	0	0	0	0	0	0	0	0	0	0	0	0	0	0	0	0	0	0	-0.0285469597487868	0	0	0	0	0	0	0	0	0	0	0	0	0	0	0	0	0	0	0	0	0	0	0	0	0	0
1840	0	0	0	0	0	0	0	0	0	0	0	0	0	0	0	0	0	0	0	0	0	0	0	0	0	0	0	0	0	0	0	0	0	0	0	0	0	0	0	0	0	0	0	0	0	0	0	0	0
1841	0	0	0	0	0	0	0	0	0	0	0	0	0	0	0	0	0	0	0	0	0	0	0	0	0	0	0	0	0	0	0	0	0	0	0	0	0	0	0	0	0	0	0	0	0	0	0	0	0
1842	0	0.0274725274725275	0	0	0	-0.0180470665840506	0	0	0	0	0	0	0	0	0	0.086354057847214	-0.0125580811252041	0.127160921459553	0.137362637362637	0.0023563652221194	-0.0376742433756122	0.158569924361712	0.0172708115694427	0	0.0549450549450549	-0.579224241788602	0	0	0	0.0549450549450549	0	-0.0376742433756122	0	0	-0.0125580811252041	-0.0879065678764285	0	0	0	0	0	0	0	0	0	0	0	0	-0.0125580811252041
1843	0	0	0	0	0	0	0	0	0	0	0	0	0	0	0	0	0	0	0	0	0	0	0	0	0	0	0	0	0	0	0	0	0.022456770716371	0	0	0	0	0	0	0.022456770716371	0	0	0.134740624298226	0	0	0.134740624298226	0	0	0.269481248596452
1844	0	0	0	0	0	0	-0.00954653937947494	0	0	0	0	0	0.0205170291341814	0	0	0	0	0	0.0205170291341814	0	0	0	0	0	0	0	0	0	0	0	0	0	0	0	0	0	0	0	0.0205170291341814	0	0	0	0	0	0	-0.0190930787589499	0	0	0
1845	0	0.112107623318386	0.0139364450715296	0	0	0	0	-0.0422713822742004	0	0.0560538116591928	0	0	0	0	0	0	-0.0281809215161336	0	0	0	0	0	0	-0.0140904607580668	0	0	0	0	0	0	0	0	0	0	0	0	0	0	0	0	0.0280269058295964	0	0	0	-0.0281809215161336	0	0	0	0
1846	0	0	0	0	0	0	0	0	0	0	0	0	0	0	0	0	0	0	0	0	0	0	0	0	0	0	0	0	0	0	0	0	0	0	0	0	0	0	0	0	0	0	0	0	0	0	0	0	0
1847	0	0	0	0	0	-0.01573564122738	0	0	0	0	0	0	0	0	0	0	0	0	0	0	0	0	0	0	0	0	0	-0.03147128245476	0	0	0	0	0	0	0	0	0	0	0	0	0	0	0	0	0	0	0	0	0
1848	0	0	0	0	0	0	0	0	0	0	0	0	0	0	0	0	0	0	0	0	0	0	0	0	0	0	0	0	0	0	0	0	0	0	0	0	0	0	0	0	0	0	0	0	0	0	0	0	0
1849	0	0	0	0	0	0	0	0	0	0	0	0	0	0	0	0	0	0	0	0	0	0	0	0	0	0	0	0	0	0	0	0	0	0	0	0	0	0	0	0	0	0	0	0	0	0	0	0	0
1850	-0.0140904607580668	0	0	0	0	0	0	0	0	0	0.0112574580659687	0	0	0	-0.00469682025268893	0	0	0.0112574580659687	0	0	-0.00469682025268893	0	-0.00939364050537786	-0.0187872810107557	0	0	0.0290755539452172	0	0	0	-0.00469682025268893	0	0.0243787336925282	0	0.0853628442750607	0	0	0	0	0	0	0.0290755539452172	0	0	0	0.0506212849456473	0	0	0.0788022064617809
1851	0	0	0	0	0	0	0	0	0	0	0	0	0	0	0	0	0	0	0	0	0	0	0	0	0	0	0	0	0	0	0	0	0	0	0	0	0	0	0	0	0	0	0	0	0	0	0	0	0
1852	0	0	0	0	-0.0694444444444444	0	0	-0.347222222222222	-0.0694444444444444	-0.0695407612883342	0	0	-0.138985205732778	-0.138888888888889	0	-0.0694444444444444	0	0	-0.138888888888889	0	0	0	0	0	0	0	0	0	0	0	0	0	0	0	0	0	0	0	0	0	0	0	0	-0.0694444444444444	0	0	0	0	0
1853	0	0	0	0	0	0	0	0	0	0	0	0	0	0	0	0	0	0	0	0	0	0	0	0	0	0	0	0	0	0	0	0	0	0	0	0	0	0	0	0	0	0	0	0	0	0	0	0	0
1854	0	0.0203491789455746	0	0	0	0	0.0396631731782385	0	0	0	0	0	0	0	-0.00842530963012891	0.222360107295377	0	0.120221207020918	0	0.359431933576552	0	0.0071936221439259	0	2.41738319444673	0.0468567953221644	0.0480884828083674	2.33446712732454	-0.0337012385205156	0.225858666980692	0.050355355007481	0.604408092016617	0.661564063621435	0.0215808664317777	0.0528187299798867	0.0480884828083674	-0.001231687486203	0	0.396435229009093	-0.0205456817188669	-0.0265076163765897	-8.94805765213102	-0.039859675951531	-0.117954334821805	0.0480884828083674	-0.437080916053793	-0.00842530963012891	-0.258917726334883	-0.0168506192602578	-1.15466042487425
1855	-0.0234852043212776	0	0	0	0	0	0	0	0	0	-0.0117426021606388	0	0	0	0	-0.0234852043212776	0	-0.0352278064819164	0	0	0	0	0	0	0	0	0	0	0	-0.0117426021606388	0	0	0	0	0	0	0	0	0	0	0	-0.0117426021606388	-0.0352278064819164	0	0	-0.0117426021606388	0	0	0
1856	0	0	0	0	0	0	0	0	0	0	0	0	0	0	0	0	0	0	0	0	0	0	0	0	0	0	0	0	0	0	0	0	0	0	0	0	0	0	0	0	0	0	0	0	0	0	0	0	0
1857	-0.0143647202470732	0	0	0	0	0.0156887354879197	-0.0723858851546696	0	0	0	-0.09979131040797	0	0	0	-0.0345877853768365	0	0	0	0	-0.0143647202470732	0	0	0	0	0	0	0	0	0	0	0	0	0	0	0	0	0	0	0	0	0	0	0	0	0.0313774709758393	0.0013240152408465	0	0	0
1858	-0.0152578577967653	0	0	0	0	0	0	0	0	-0.0305157155935307	0	0	0	0	0	0	0	-0.0305157155935307	0	0	0	0	0	0	-0.0152578577967653	0	-0.0305157155935307	0	0	0	-0.0305157155935307	0	0	0.0790513833992095	-0.0152578577967653	0.0263504611330698	0	0.0263504611330698	0	0	0	0	0	0	0	0	0	0	0
1859	0	0	0	0	0	0	0	0	0	0	0	0	0	0	0	0	0	0	0	0	0	0	0	0	0	0	0	0	0	0	0	0	0	0	0	0	0	0	0	0	0	0	0	0	0	0	0	0	0
1860	0	0	0	0	0	0	0	0	0	0	0	0	0	0	0	0	0	0	0	-0.0312891113892365	-0.0156445556946183	0	0	0	0	0	0	0	0	0	0	0	0	0	0	0	0	0	0	0	0	0	0	0	0	0	0	0	0
1861	0	0	0	0	0	0	0	0.147710487444609	0	0	0	0	0.043688296043777	0	0	-0.0346740638002774	0	-0.13869625520111	0	0	0	0.369276218611521	0	0	0	0	0	0	0	0	0	0	0	0	0	0	0.147710487444609	0	0	0	-0.0346740638002774	0	-0.0346740638002774	0	0	0	0	0	0.221565731166913
1862	0	0	0	0	0	0	0	0	0	0	0	0	0	0	0	0	0	0	0	0	0	0	0	0	0	0	0	0	0	0	0	0	0	0	0	0	0	0	0	0	0	0	0	0	0	0	0	0	0
1863	-0.271097786566307	0	-0.057940507324955	0	0.449171822840254	0	0	-0.252493036507835	0	0	-1.12160064638217	0.273224043715847	0	0	-0.0972762645914397	0	0	0.0393357572664843	0	0	0	0	0	0	0	0	0	0	0.683060109289617	0	0	0	0	0.136612021857924	0	0	0	0.449171822840254	0	0	0.956284153005464	0	0	0.68943888073824	0	0	1.52346324764517	0	-0.194552529182879
1864	0	0	0	0	0	0	0	0	0	0	0	0	0	0	0	0	0	0	0	0	0	0	0	0	0	0	0	0	0	0	0	0	0	0	0	0	0	0	0	0	0	0	0	0	0	0	0	0	0
1865	0	0	0	0	0	0.523414554874314	0	0	0	0.0530033244115555	0	0	0	0	0	0	0	0	0	0.200659286021005	0	0	0.110741971207087	-0.041649312786339	0	1.48597645038082	0.016089334009193	0.833847223432961	0.069092658420748	0	0.073827980804725	0.296226701406713	-0.041649312786339	0.12683130521628	0.40793726128325	-0.0208246563931695	0	0	0.073827980804725	0	0.338844602862502	0.016089334009193	0	0	0	0.475146552846736	0.0369139904023625	0.110741971207087	0.863173935924626
1866	0	0	0	0	0	0	0	0	0	0	0	0	0	0	0	0	0	0	0	0	0	0	0	0	0	0	0	0	0	0	0	0	0	0	0	0	0	0	0	0	0	0	0	0	0	0	0	0	0
1867	0	0	0	0	0	0	0	0	0	0	0	0	0	0	0	0	0	0	0	0	0	0	0	0	0	0	0	0	0	0	0	0	0	0	0	0	0	0	0	0	0	0	0	0	0	0	0	0	0
1868	0	0	0	0	0	0	0	0	0	0	0	0	0	0	0	0	0	0	0	0	0	0	0	0	0	0	0	0	0	0	0	0	0	0	0	0	0	0	0	0	0	0	0	0	0	0	0	0	0
1869	0	0	0	0	0	0	0	0	0	0	0	0	0	0	0	0	0	0	0	0	0	0	0	0	0	0	0	0	0	0	0	0	0	0	0	0	0	0	0	0	0	0	0	0	0	0	0	0	0
1870	0	0	-0.00652954619653934	0	0	0	0	0	0	0	0	0	0	0	0	0	-0.00652954619653934	0	0	0	0	0	0	0	0	0	0	0	0	0	0	0	0	0	0	0	0	0	0	0	0	0	0	0	-0.0130590923930787	0	0	0	0
1871	0	0	0	0	0	0	0	0	0	0	0	0	0	-0.0206440957886045	0	0	0	0	0	0	0	0	0	0	0	0	0	0	0	0	0	0	0	0	0	0	0	0	0	0	-0.0206440957886045	0	0	0	0	0	0	0	0
1872	0	0	0	0	0	0	0	0	0	0	0	0	0	0	0	0	0	0	0	0	0	0	0	0	0	0	0	0	0	0	0	0	0	0	0	-0.117096018735363	0	0	0	0	0	0	0	0	0	0	0	-0.0585480093676815	0
1873	0	0	0	0	0	0	0	0	0	0	0	0	0	0	0	0	0	0	0	0	0	0	0	0	0	0	0	0	0	0	0	0	0	0	0	0	0	0	0	0	0	0	0	0	0	0	0	0	0
1874	0	0	0	0	0	0	0	0	0	0	0	0	0	0	0	0.103039670273055	0	0	0	0	0	0	0	0	0	0	0	0	0	0	0	0	0	0	0	0	0	0	0	0	0	0	0	0	0	0	0	0	0
1875	0	0	0	0	0	0	0	0	0	0	0	0	0	0	0	0	0	0	0	0	0	0	0	0	0	0	0	0	0	0	0	0	0	0	0	0	0	0	0	0	0	0	0	0	0	0	0	0	0
1876	0	0	0	0	0	0	0	0	0	0	0	0	0	0	0	0	0	0	0	0	0	0	0	0	0	0	0	0	0	0	0	0	0	0	0	0	0	0	0	0	0	0	0	0	0	0	0	0	0
1877	0	0	0	0	0	0	0	0	0	0	0	0	0	0	0	0	0	0	0	0	0	0	0	0	0	0	0	0	0	0	0	0	0	0	0	0	0	0	0	0	0	0	0	0	0	0	0	0	0
1878	0	0	0	0	0	0	0	0	0	0	0	0	0	0	0	0	0	0	0	0	0	0	0	0	0	0	0	0	0	0	0.0512163892445583	0	0	0	0	0	0	0	0	0	-0.00826787928896238	0	0	0	0	0	0	0	0
1879	0	0	0	0	0	0	0	0	0	0	0	0	0	0	0	0	0	0	0.0083240628802608	0	0.0203458799593082	0	0	0	0	0	0.0203458799593082	0	0	0	0	0.0203458799593082	0	0	0	0	0	0.0203458799593082	0	0	-0.0161838485191779	0	0	-0.0161838485191779	0	-0.0323676970383557	-0.0161838485191779	0	0
1880	0	0	0	0	0	0	0	0	-0.0270489586150933	0	0	0	0	-0.0270489586150933	0	0	0	0	0	0	0	0	0	0	0	0	0	0	0	0	0	0	0	0	0	0	0	0	0	0	0	0	0	0	0	0	0	0	0
1881	0	0	0	0	0	0	0	0	0	0	0	0	0	0	0	0	0	0	0	0	0	0	0	0	0	0	0	0	0	0	0	0	0	0	0	0	0	0	0	0	0	0	0	0	0	0	0	0	0
1882	0	-0.0145496871817256	0	-0.0145496871817256	0	0	0	0	0	0	0	0	0	0	0	0	0	0	0	0	0	0	0	0	0	0	0	0	0	0	0	0	0	0	0	0	0	0	0	0	0	0	0	0	0	-0.0145496871817256	0	0	-0.0145496871817256
1883	0	0	0	0	0	0	0	0	0	0	0.050709939148073	0	0	0	0	0	0	0	0	0	0	0	0	0	0	0	0	0	0	0	0	0	0	0	0	0	0	0	0	0	0	0	0	0	0	0	0	0	0
1884	0	0	0	0	0	0	0	0	0	0	0	0	0	0	0	0	0	0	0	0	0	-0.075817618866736	0	0	0.079957904901354	0	0	0	0	0	0	0	0	0	0	0	0	0	0	0	0	0	0	0	0	0	0	0	0
1885	0	0	0	0	0	0	0	0	0	0	0	0	0	0	0	0	0	0	0	0	0	0	0	0	0	0	0	0	0	0	0	0	0	0	0	0	0	0	0	0	0	0	0	0	0	0	0	0	0
1886	0	0	0	0	0	0	0	0	0	0	0	0	0	0	0	0	0	0	0	0	0	0	0	0	0	0	0	0	0	0	0	0	0	0	0	0	0	0	0	0	0	0	0	0	0	0	0	0	0
1887	0	0	0	0	0	0	0	0	0	0	0	0	0	0	0	0	0	0	0	0	0	0	0	0	0	0	0	0	0	0	0	0	0	0	0	0	0	0	0	0	0	0	0	0	0	0	0	0	0
1888	0	-0.0416111850865513	-0.0166444740346205	0	-0.081647553304201	0.0167757087736957	-0.00832223701731025	0	0	0	0	-0.0248354763128556	0	0	0	0	0	0	0	0.0336826522864666	-0.0247042415737804	0	0	0	0	-0.0166444740346205	0	-0.0166444740346205	0	0	0	0	0	0	0	0	-0.0495397178866359	0	0	0	0	0	0	0	-0.114280327678065	0.0167757087736957	0	0	-0.34094924823157
1889	0	0	0	0	0	0	0	0	0	0	0	0	0	-0.0818598559266536	0	0	0	0	0	0	0	0	0	0	0	0	0	0	0	0	0	0	0	0	0	0	0	0	0	0	0	0	0	0	0	0	0	0	0
1890	0	0	0	0	0	0	0	0	0	0	0	0	0	0	0	0	0	0	0	0	0	0	0	0	0	0	0	0	0	0	0	0	0	0	0	0	0	0	0	0	0	0	0	0	0	0	0	0	0
1891	0	0	0	0	0	0	-0.001530678626369	0	-0.0007653393131845	0	0	0	0	0	0.00117061750073164	0	0	0	0	-0.0007653393131845	0	0	0	-0.0007653393131845	0	0	0	0	0	0	0	0	0	0	0	-0.001530678626369	0	0	0	0	0	0	0	0	0	0	0	0	0
1892	0	0	0	0	0	0	0	0	0	0	0	0	0	-0.0287935502447452	0	0	-0.0143967751223726	0	0	0	0	0	0	0	0	0	0	0	0	0	0	-0.0287935502447452	0	0	0	0	0	0	0	0	0	0	0	0	0	0	0	0	0
1893	0	0	0	0	0	0	0	0	0	0	0	0	0	0	0	0	0	0	0	0	-0.06765899864682	0	0	0	0	0	0	0	0	0	0	0	0	0	0	0	0	0	0	0	0	0	0	0	0	0	0	0	0
1894	0	0	0	0	0	0	0	0	0	0	0	0	0	0	0	0	0	0	0	0	0	0	0	0	0	0	0	0	0	0	0	0	0	0	0	0	0	0	0	0	0	0.0142456906785697	0	0	0	0	0	0	0
1895	0	0	0	0	0	0	0	0	0	0	0	0	0	0	0	0	0	0	0	0	0	0	0	0	0	0.0489356496207487	0	-0.0035015952903155	0	0	0	-0.0186462800671266	-0.0035015952903155	0	0	0	0	0.295933847177424	-0.0093231400335633	0	0	0.0244678248103744	0	0.0605787391072442	0	-0.0128247353238788	0	0	0.0244678248103744
1896	0	0	0	0	0	0	0	0	0	0	0	0	0	0	0	0	0	0	0	0	0	0	0	0	0	0	0	0	0	0	0	0	0	0	0	0	0	0	0	0	0	0	0	0	0	0	0	0	0
1897	0	0	0	0	0	0	0	0	0	0	0	0	0	0	0	0	0	0	0	0	0.0192733930808519	0	0	0	0	0	0	0	0.00963669654042594	0	0	0	0	0	0	0	0	0	0	0	0	0	0	-0.0273926942385908	0	-0.00625586487331874	0	0	0
1898	0	0	0	0	0	0	0	0	0	0	0	0	0	0	0	0	0	0	0	0	0	0	0	0	0	0	0	0	0	0	0	0	0	-0.0225292880744968	0	0	0	0	0	0	0	0	0	0	0	0	0	0	0
1899	0.0238834487700024	0	0	0	0	0	0	0	0	0	0	0	0	0	0	0	0	0	0	0	0	0	0	0	0	0	0	0	0	0	0	0	0	0	0	0	0	0	0	0	0	0	0	0	0	0	0	0	0
1900	0	0	0	0	0	0	0	0	0	0	0	0	0	0	0	0	0	0	0	0	0	0	0	0	0	0	0	0	0	0	0	-0.037243947858473	0	0	0	0	0	0	0	0	0	0	0	0	0	0	0	0	0
1901	0	0	0	0	0.0614628149969269	0	0	0	0	0	0	0	0	0	0	0	-0.0288350634371396	0	0	0	0	0	0	0	0	0	0	0	0	0	0	0	0	0	0	0	0	0	0	0	0	0	0	0	0	0	0	0	0
1902	0	0	0	0	0	0	0	0	0	0	0	0	0	0	0	0	0	0	0	0	0	0	0	0	0	0	0	0	0	0	0	0	0	0	0	0	0	0	0	0	0	0	0	0	0	0	0	0	0
1903	0	0	0	0	0	0	0	0	0	0	0	0	0	0	0	0	0	0	0	0	0	0	0	0	0	0	0	0	0	0	0	0	0	0	0	0	0	0	0	0	0	0	0	0	0	0	0	0	0
1904	0	0	0	0	0	0	0	0	0	0	0	0	0	0	0	0	0	0	0	0	0	0	0	0	0	0	0	0	0	0	0	0	0	0	0	0	0	0	0	0	0	0	0	0	0	0	0	0	0
1905	0	0	0	0	0	0	0	0	0	0	0.0166583374979177	0	0	0.007763914301262	0	0	0	0	0	0.0333166749958354	0	0	-0.0722858944686393	0	0	0	0	0	-0.0088944231966557	0	0	0	0	0.0577389267950151	0	0	0	0	0	0.0166583374979177	0	0	0.133266699983342	0	0	0	0	0	0
1906	-0.0096237128284092	0	0	0	0.0286985220261157	0	0.0430477830391735	0	0	0	0	0	0	0	-0.0096237128284092	0	0	0	0.0717463050652891	0	-0.0096237128284092	0	0	-0.0096237128284092	0	0	0.0286985220261157	0	0.0286985220261157	0	0.0190748091977065	0	0	0	0.0143492610130578	0	0	0	0	0	0	0	0	0	0	0	0	0	0
1907	0	0	0	0	0	0	0	0	0	0	0	0.0342583076396026	0	0	0	-0.0186081131373279	0	0	0	0	0	0	0	0	0	0	0	0	0	0	0	0	0	0	0	0	0	0	0	0	0	0	0	0	0	0	0	0	0
1908	0	0	0	0	-0.0075993616536211	0	0.017307026652821	0	0	0	0.017307026652821	0	0	0	0	0	0	0	0	0	0	0	0	0	0	0	0	0	0	0	0	0	0	0	0.017307026652821	0	0	0	0.0194153299983999	0	0	-0.0075993616536211	0.0346140533056421	0	0.017307026652821	0	0	0	0
1909	0	0	0	0	0	0	-0.0212404418011895	0	0	0	0	0	0	0	0	0	0	0	0	0	0	0	0	0	0	0	0.0461680517082179	0	0	0	0	0	0	0	0	0	0	0	0	0	0	0	0	0	0	0	0	0	0
1910	0	0	0	0	0	0	0	0	0	0	0	0	0	0	0	0	0	0	0	-0.0228050171037628	0	0	0	0	0	0	0	0	0	0	0	0	0	0	0	0	0	0	0	0	0	0	0	0	0	0	0	0	0
1911	0	0	0	0	0	0	-0.0212224108658744	0	0	0	0	0	0	0	0	0	0	-0.00707413695529145	0	0	0	0	0	0	0	0	0	0	0	0	0	0	0	0	0	0	0	0	0	0	0	0	0	0	0	0	0	0	0
1912	0	0	0	0	0	0	0	-0.00906453952139231	-0.0634517766497462	-0.0271936185641769	0	0	0	0	0	0	-0.0040079009662172	0	0	-0.00906453952139231	0	-0.0181290790427846	0	0	0	0.0977995089470134	0	-0.0543872371283539	0	-0.00906453952139231	0	0	0	0	0	0	0	-0.00906453952139231	0	0	0	-0.0271936185641769	-0.00906453952139231	0	0	0	0	0	0
1913	0	-0.0350508236943568	0	0	0	0	0	0	0	0	0	0	0	0	0	0	0	0	0	0	0	0	0.104384133611691	0	0	0	0	0	0	-0.0350508236943568	0	0	0	0	0	0	0	0	0	0.104384133611691	0	0	0	0	0	0	0	0	0
1914	0	0	0	0	0	0	0	0	0	0	0	0	0	0	0	0	0	0	0	0	0	0	0	0	0	0	0	0	0	0	0	0	0	0	0	0	0	0	0	0	0	0	0	0	0	0	0	0	0
1915	0	0	0	0	0	0	0	0	0	0	0	0	0	0	0	0	0	0	0	0	0	0	0	0	0	0	0	0	0	0	0	0	0	0	0	0	0	0	0	0	0	0	-0.134680134680135	0	0	0	-0.269360269360269	0	0
1916	0	0	0	0	0	-0.0114744693057946	-0.0229489386115892	-0.0114744693057946	0	0	0	0	0	0	0	0	0	0	0	0	0	0	0	0	-0.0229489386115892	0	-0.0114744693057946	0	0	0	0	0	0	0	-0.0114744693057946	0	0	0	0	0.0435729847494553	0	0	0	-0.0114744693057946	0	0	-0.0229489386115892	0	0
1917	0	0	0	0	0	0	0	0	0	0	-0.00497561946462335	0	0	0	-0.00497561946462335	0	0	0	-0.00497561946462335	0	0	0	0	0	0	0	0	0	0	0	0	-0.00497561946462335	0	0	0	0	0	0	0	0	0	0	0	0	0	0	0	0	0
1918	0	0	0	0	0	0	0	0	0	0	0	0	0	-0.0678886625933469	0	0	0	0	0	-0.88255261371351	0	0	0	0	-0.135777325186694	0	0	0	0	0	0	0	-0.0678886625933469	0	0	0	0	0	0	0.0552181115405853	0	0	0	-0.0678886625933469	0	0	0	0	0
1919	0	0	0	0	0	0	0	0	0	0	0	0	0	0	0	0	0	0	0	0	0	0	0	0	0	0	0	0	0	0	0	0	0	0	0	0	0	0	0	0	0	0	0	0	-0.00447547440028643	0	-0.00447547440028643	0	0
1920	0	0	0	0	0	0	0	0	0	0	0	0	0	0	0	0	0	0	0	0	0	0	0	0.0447227191413238	0	0	0	0	0	0	0	0	0	0	0	-0.0834202294056309	0	0	-0.125130344108446	0	0.0447227191413238	0	0	0.223613595706619	-0.0208550573514077	0	0	0.0030126044385084	0
1921	0	0	0	0	0	0	0.125944584382872	0	0	-0.0614628149969269	0	0	0	0	0	0	0	0	0	0	0	0	0	0	0	0	-0.0614628149969269	0	0	0	0	0	0	0	0	0	0	0	0	0	0	0	0	0	0	0	0	0	0
1922	0	0	0	0	0	0	0	0	0	0	0	0	0	0	0	0	0	0	0	0	0	0	0	0	0	0	0	0	0	0	0	0	0	0	0	0	0	0	0	0	0	0	0	0	0	0	0	0	0
1923	0	0	0	0	0	0	0	0	0	0	0	0	0	0	0	0	0	0	0	0	0	0	0	0	0	0	0	0	0	0	0	0	0	0	0	0	0	0	0	0	0	0	0	0	0	0	0	0	0
1924	0	0	0	0	0	0	0	0	0	0	0	0	0	0	0	0	0	0	0	0	0	0	0	0	0	0	0	0	0	0	0	0	0	0	0	0	0	0	0	0	0	0	0	0	0	0	0	0	0
1925	0	0	0	0	0	0	0	0	0	0	0	0	0	0	0	0	0	0	0	0	0	0	0	0	0	0	0	0	0	0	0	0	0	0	0	0	0	0	0	0	0	0	0	0	0	0	0	0	0
1926	0	0	0	0	0	0	0	0	0	0	0	0	0	0	0	0	0	0	0	0	0	0	0	0	0	0	0	0	0	0	0	0	0	0	0	0	0	0	0	0	0	0	0	0	0.0234659157573624	0	0	0	0
1927	0	0	0	0	0	0	0	0	0	0	0	0	0	0	0	0	0	0	0	0	0	0.0278706800445931	0	0	0	0	0	0	0	0	0	0.0278706800445931	0	0	0	0	0	0.0836120401337793	0	0	0	0	0	0.167224080267559	0.226398192737604	0.0836120401337793	-0.0122189638318671	0	0
1928	0	0	0	0.0732600732600733	0	0	0	-0.0685714285714286	0.0366300366300366	0	0	0	0	0	0.0366300366300366	0	0.0732600732600733	0	0	0	0	0	0.0779487179487184	0	0	0	0	0	-0.0457142857142857	0.0504029304029304	0.371575091575092	0.0366300366300366	0	0	-0.0228571428571429	0	0.0366300366300366	0	0.123663003663004	0	0	0	0.504029304029304	0	0	0	0	0	0.0413186813186814
1929	0	0	0	0	0	0	0	0	0	0	0	0	0	0	0	0	0	0	0	0	0	0	0	-0.0786782061369001	0	0	0	0	-0.0786782061369001	0	0	0	0	0	0	0	0	0	0	0	0	0	0	0	0	0	0	0	0
1930	0	0	0	-0.00616218880946512	0	0	0	0	0.01998001998002	0	0	0	-0.0108309240673056	-0.0123243776189302	0	0	0	0	0	0	0	0	0	0	0	0	0	0.01998001998002	0	0	0	0	0	0	0	0	0	0	0	0	0	0	0	0	0	0	0	0	0
1931	0	0	0	0	0	0	0	0	0	0	0	0	0	0	0	0	0	0	0	0	0	0	0	0	0.0650195058517555	0	0	0	0	0	0	0	0	0	0	0	0	0	0	0	0	0	0	0	0	0	0	0	0
1932	0	-0.103573278094252	0	-0.0517866390471258	0.15785319652723	0	0	0	0	0	0	-0.103573278094252	-0.0517866390471258	0	-0.103573278094252	0.236779794790845	0	0	-0.0517866390471258	0	0	0	0	0	0	0	0	0	0	0	0	0	0	0	0	0	0	-0.0517866390471258	0.0789265982636148	0	0	0	0	0	0	0	-0.103573278094252	0	0
1933	0	0	0	0	0	0	0	0	0	0	0	0	0	0	0	0	0	0	0	0	0	0	0	0	0	0	0	0	0	0	0	0	0	0	0	0	0	0	0	0	0	0	0	0	0	0	0	0	0
1934	0	0	0	0	0	0	0	0	0	0	0	0	0	0	0	0	0	0	0	0	0	0	0	0	0	0	0	0	0	0	0	0	0	0	0	0	0	0	0	0	0	0	0	0	0	0	0	0	0
1935	0	0	0	0	0	0	0	0	0	0	0	0	0	0	0	0	0	0	-0.0135943447525829	0	0	0	0	0	0	0	0	0	0	0.0209643605870021	0	-0.0135943447525829	0	0	0	0	0	0	0	0	0	0	0	-0.0271886895051659	0	0	0	0	0
1936	0	0	0	0	-0.0318835648176966	0	0	0	0	0	0	0	0	0	0	0	0	0	0	0	0	0	0	0	0	0	0	0	0	0	0	0	0	0	0	0	0	0	0	0	0	0	0	0	0	0	0	0	0
1937	0	0	0	0	0	0	0	0	0	0	0	0	0	0	0	0	0	0	0	0	0	0	0	0	0	0	0	0	0	0	0	0	0	0	0	0	0	0	0	0	0	0	0	0	0	0	0	0	0
1938	0	0	0	0	0	0.0205170291341814	0	0	0	0	0	0	-0.0131856540084388	0	0	0	0	0	0	0	0	0	0	0	0	0	0	0	0	0	0	0	0	0	0	0	0	0	0	0	0	0	0	0	0	0	0	0	0
1939	0	0	0	0	-0.132890365448505	0	0	-0.199335548172757	0	0	0	0	0	0	0	0	-0.0664451827242525	0	0	0	0	0	0	0	0	0	0	0	0	0	0	0	0	0	0	0	0	0	-0.199335548172757	0	0	0	0	0	0	0	0	0	0
1940	0	-0.0261301280376274	0	-0.011956278170333	0.178041543026706	-0.156780768225764	0	0	-0.0522602560752548	-0.0261301280376274	0	-0.0522602560752548	0	-0.0261301280376274	0	0	0	0	0	0	0	0	0	0.118694362017804	0	0	0.0925642339801766	0	0	-0.0261301280376274	0	0	0	0	-0.10452051215051	-0.0522602560752548	0	-0.0261301280376274	0	0	0	0	0	0	0	0	-0.0783903841128822	0	-0.0522602560752548
1941	0	0	0	0	0	0	0	-0.222882615156018	0	0	0	0	0	0	0	0	0	0	0	0	0	0	0	0	0	0.187265917602996	0	0	0	0	0	0	0	0	0	0	0	0	0	0	0	0	0	0	0	0	0	0	-0.0742942050520059
1942	0	0	0	0	0	0	0	0	0	-0.00344530577088717	0	-0.00344530577088717	0	-0.00344530577088717	0	0.0100290843445993	0	0	0	-0.00344530577088717	0	-0.00344530577088717	0	0	0	0.0100290843445993	0	-0.00344530577088717	0	-0.00344530577088717	0	0.0100290843445993	0	0	0	0	0	0	0	0	0	0	0	0	0	0	0	0	0
[truncated: 2,450 more rows]
[truncated: 352 more columns]
