# Supplementary material for: Ssl2/TFIIH function in transcription start site scanning by RNA polymerase II in Saccharomyces cerevisiae
Source: eLife. 2021 Oct 15;10:e71013. doi: 10.7554/eLife.71013 (PMC8589449; doi:10.7554/eLife.71013)
Supplement: Figure 4—figure supplement 1—source data 2. [file elife-71013-fig4-figsupp1-data2.csv]

	V1	V2	V3	V4	V5	V6	V7	V8	V9	V10	V11	V12	V13	V14	V15	V16	V17	V18	V19	V20	V21	V22	V23	V24	V25	V26	V27	V28	V29	V30	V31	V32	V33	V34	V35	V36	V37	V38	V39	V40	V41	V42	V43	V44	V45	V46	V47	V48	V49
1	0	0	0	0	0	0.000102056437209777	0	0	0	0	0	0	-6.05746352195467e-05	0	0	0	0	0	0	0	0	0	0	0	0	0	-6.05746352195467e-05	0	0.000102056437209777	0	0	0	0	0	0	-0.000121149270439093	0	0	-6.05746352195467e-05	0	0	0	0	0	-0.000121149270439093	0	0	0	0
2	0	0	0	0	0	0	0	0	0	0	0	0	0	0	0	0	0	0	0	0	0	0	0	0	0	0	0	0	-0.000415498078321388	0	0	0	0	0	0	0	0	0	0	0	0	0	0	0	0	0	0	0	0
3	0	0	0	0	0	0	0	0	0	0	0	0	0	0	0	0.000239363285222701	0.00730847234656776	0.00365423617328388	0.00548135425992582	0	-0.00209174388687849	0	0	0	0	0	0	0	0	0	-0.0102193561491698	0.00182711808664194	-0.00836697554751396	0.00129786648616884	0	0.00365423617328388	0	0	0	0.00365423617328388	0	0	0	0	0	-0.00418348777375698	0.0109374460048378	0	0
4	0	0	0	0	0	0	0	0	0	0	0	0	0	0	0	0	0	0	0	0	0	0	0	0	0	0	0	0	0	0	0	0	0	0	0	0	0	0	0	0	0	0	0	0	0	0	0	0	0
5	0	0	0	0	0	0	0	0	0	0	0	0	0	0	0	0	0.0210172341319882	0	0	0	0	0	-0.0202101859337106	0	0.0037718884214239	0	0	0	0	0	0	0	0	0	0	0	0.0105086170659941	0	0	0	0	0	0.0105086170659941	0	0	0	0.0105086170659941	0	0
6	0	0	0	0	0	0	-0.00124500441976569	0	0	0	0	0	0	0	0	0	0	-0.00124500441976569	0	0	0	0	0	-0.00124500441976569	0	-0.00622502209882845	0	0	0	0	0	0	0.00199192244187187	0	0	0	0	0	-0.00460655866800967	0	0	0	-0.00249000883953138	0	0	0	0	0	0
7	0	0	0	-0.00287505031338048	0	0	0	0	0	0	0	-5.74345798142199e-05	0	0	0	0	0	0	0	0	0	0	0	0	0	0	0	0	0	0	0	0	0	0	0	0	0	0	-0.00575010062676097	0	0	0	0	0	0	0	0	0	0
8	0	0	0	-0.00266418009857466	0	0	0	0	0	0	0	0	0.0119875329657157	0	0	0	0	0	0	0	0	0	0	0	0	0.0119875329657157	-0.00532836019714933	0	0	0	0.210447233185733	0.035962598897147	0	0	0	0.0639326574985699	-0.00266418009857466	0	0.0213108858328566	0	0	0	0	0	0	0	-0.00266418009857466	0	0
9	0	0	0	0	0	0	0	0	0	-0.000155240933929459	0	0	0.000991881450329057	-0.000155240933929459	0	-0.000931445603576751	-0.000155240933929459	0	-0.00170765027322404	0	0	0	0	0	0	0	-0.000155240933929459	0	0	0	0	0	0	0	-0.000155240933929459	0	0	0	0	0	0	0.000991881450329057	0	0	0	0	0	0	0
10	0	0	0	0	0	0	0	0	0	0	0	-0.00883080183680678	0	0	0	0	0	0	0	0	0	0	0	0	0	0	0	0	0	0	0	0	0	0	0	0	0	0	0	0	-0.00883080183680678	0	0	0	0	0	0	0	0
11	-0.0038249694002448	-0.0076499388004896	0	0	-0.0076499388004896	0.260501883361212	-0.0038249694002448	0	0	-0.0076499388004896	0.134009288721931	-0.0038249694002448	-0.0994492044063647	-0.0167761444748365	-0.0038249694002448	0	0	0.0193934514324272	0	0	0	0	0	0	0	0	0	0	0.0461682372341408	-0.0038249694002448	0.0138236107271219	0.068178995624159	0	0.0138236107271219	0.0123473438532646	0	0.023822252053999	-0.0091262056743469	0.0285196571067741	0.0138236107271219	-0.0114749082007344	0.0085223744530198	0.0164409176847127	0.109918432236728	-0.0038249694002448	-0.0114749082007344	-0.0038249694002448	0.013488383936998	0.218695824389722
12	0	0	0	0	0	0	0	0	0	0.0008954483845464	0	-0.00998542128492401	0	0	0	0	-0.0039941685139696	0	0	0	0	0	0.002444808449258	0	0	0	0	0	0	0	0	0	0	0	0	0	0	0	0	0	0	0	0	0	0	0	-0.0039941685139696	0	0
13	0	0	0	0	0.00335210512201663	0	0	0	0	0	0	0	0	0	0	0.00335210512201663	0	0	0	0	0	-0.00341093203717916	0.00670421024403325	0	0	0	0.0132907666577415	0	0	0	0	0	0	-0.00682186407435832	0	0	-0.00170546601858958	0	0	0	0	0	0	0	0	0	0	0	0
14	0	0	-0.019005986885869	0.0131926121372032	0	0	0	0	0	0	0	0	0	0	0	0	0	0	0	-0.00950299344293452	0	0	0	0	0	0	0	0	0	0	0	0	-0.00950299344293452	0	0	0	0	0	0	0.0263852242744063	0	0	0	0	0	0	0	0	0
15	0	0	0	0	0	0	0	0	0	0	0	0	0	0	0	0	0	0	0	0	0	0	0	0	0	0	0	0	0	0	0	0	0	0	0	0	0	0	0	0	0	0	0	0	0	0	0	0	0
16	0	0	0	0	0	0	0	0	0	0	0	0	0	0	0	0	0	0	0	0	0	0	0	0	0	0	0	0	0	0	0	0	0	0	0	0	0	0	0	0	0	0	0	0	0	0	0	0	0
17	-0.00852805730854511	0	0	0	0	0	0	0	0	0	0	0	0	0	0.0378436932335823	0	0	0	0.0274499039253363	0	0	0	0	0	0	0	0	0.192149327477354	0	0	0	0	0	0	0	0	0	0	0	0	0	0	0	0	0	0	0	0	0
18	0	0	0	0	0	0	0	0	0	0	0	0	0	0	0	0	0	0	0	0	0	0	0	0	0	0	0	0	0	0	0	0	0	0	0	0	0	0.00206000438480519	0	0	0	0	0	0	0	0	-0.000620385880017371	-0.00186115764005211	0
19	0	0	0	0	0	0	0	0	0	0	0	0	0	0	0	0	0	0	0	0	0	0	0	0	0	0	0	0	0	0	0	0	0	0	0	0	0	0	0	0	0	0	0	0	0	0	0	0	0
20	0	0	0	0	0	0	0	0	0	0	0	0	0	0	0	0	0	0	0	0	0	0	0.223214285714286	0	0	0	-0.0211999152003392	0	0	0	0	0	-0.0211999152003392	0	0	-0.0211999152003392	0	0	0	0	0	0	0	0.223214285714286	0	0	0	0	-0.0423998304006784
21	0	0	0	0	0	0	0	0	0	0	0	0	0	0	0	0	0	0	0	0	0	0	0	0	0	0	0	0	0	0	0	0	0	0	0	0	0	0	0	0	0	0	0	0	0	0	0	0	0
22	0	0	0	0	0	0	0	0	0	-0.00304645849200305	0	-0.00609291698400609	0.00655952771400459	0	0.00655952771400459	0	-0.00304645849200305	0.00655952771400459	0	0	0	0	0	0	0	0.00655952771400459	0	0	0	0.00655952771400459	0	0	0	0	0	0	0	0.0131190554280092	0	0	-0.00304645849200305	0	0	0	0	-0.00304645849200305	0.00655952771400459	0	0
23	0	0.0208159866777685	0	0	0	0	0	0	0	0	0	0	0	0	0	0	0	0	0	0	0	0	0	0	0	0	0	0	0	0	0	0	0	0	0	0	0	0	0	0	0	0	0	0	0	0	0	0	0
24	0	0	0	-0.0161171092497935	0	0	0	-0.043722784143887	-0.00216839777088709	-0.0332356240155967	-0.00650519331266127	0	0	-0.0242072042059031	-0.00433679554177418	0.00679694137638063	0	-0.00216839777088709	-0.201203657889912	-0.00216839777088709	-0.0193499931991161	0.00339847068819031	0	0	-0.0130103866253225	-0.0281891710215322	-0.00216839777088709	0	0	0	0.00679694137638063	0	0	-0.00867359108354837	0	0	-0.00527512039535806	-0.00216839777088709	0	0	-0.0350491930603386	0	0	-0.00838184301982897	0	-0.0084449236822548	-0.00216839777088709	0	0
25	0	0	0	0	0	0	0	0	0	0	0	0	0	0	0	-0.000570057176734827	0	0	0	0	0	0	0	0	0	0	0	0	0	0	0	0	0	0	0	0	0	0	0	0	0	0	-0.000285028588367413	0	0	0	0	0	0
26	0	0	0.0363108206245461	0	0.0363108206245461	-0.0663129973474801	0	0	0	0.0394651425753521	0	0	0	0.0363108206245461	0	0.0726216412490922	-0.0331564986737401	0	0	0.0726216412490922	-0.0331564986737401	0	0	0	0	0	0	0.0394651425753521	0	0	0	0	0	0	0	0	0	0	0	0	0	0	0	0	0	0	0	-0.0331564986737401	0.0363108206245461
27	0	0	0	0	0	0.0214362272240086	0	0	0	0	0	0	0	0.0214362272240086	0	0	0	0	0	0	0	0	0	0	0	0	0	0	0	0	0	0	0	0	0	0	0	0	0	0	0	0	0	0	0	0	0	0	0
28	0	0.00223568602025532	0	0	0	0.00447137204051063	0	0	0	0	0	0	0	-0.00141123341800734	0	-0.00141123341800734	0	0	0	0	0.00223568602025532	0	0	0.00223568602025532	0	0	0	0	0	0	0	0	0	0.00223568602025532	0	0	0	0	0	0	0	0	0	0	0	0	0	0	0
29	0	0	0	0	0	-0.007694527267481	0	0	0	0	-0.0038472636337405	0	-0.0115417909012215	0	0	0.00524071837656721	0	0	-0.0134654227180918	0	-0.0173126863518323	0	0	-0.0101483361583948	0	0	-0.100756108030601	-0.0038472636337405	0	0	-0.00192363181687025	-0.015389054534962	0	0	0	0	-0.00192363181687025	0	0	0	0	0	0	-0.00961815908435125	0	-0.00192363181687025	0	0	0
30	0	0	0	0	0	0	0	0	0	0	0	0	0	0	0.00476985451943716	0.0119579682777139	0	0	0	-0.00810208628721896	0	0	0	0	0	0	0	0	0	0	0	0	0	0	0	0	0	0	0.00548866589526483	0	0	0	0	0	0	0	0	0	0
31	0	0	0	0	0	0	0	0	0	0	0	0	0	0	0	0	0	0	0	0	0	0	0	0	0	0	0	0	0	0	0	0	0	0	0	0	0	0	0	0	0	0	0	0	0	0	0	0	0
32	0	0	0	0	0	0	0	0	0	0	0	0	0	0	0	0	0	0	0	0	0	0	0	0	0	0	0	0	0	-0.00337001027853135	0.0699790062981106	0	0	0	0	0	0	0	0	0	0	0	0	0	0	0	0	0	0
33	0	0	0	0	0	0	0	0	0	0	0	0	0	0	0	0	0	0	0	0	0	0	0	0	0	0	0	0	0	0	0	0	0	0	0	0	0	0	0	0	0	0	0	0	0	0	0	0	0
34	0	0	0	0	0	0	0	0	0	0	0	0	0	0	0	0	0	0	0	0	0	0	0	0	0	0	0	0	0	0	0	0	0	0	0	0	0	0	0	0	0	0	0	0	0	0	0	0	0
35	0	0	0	0	0	0	0	0	0	0	0	0	0	0	0	0	0	0	0	0	0	0	0	0	0	0	0	0	0	0	0	0	0	0	0	0	0	0	0	0	0	0	0	0	0	0	0	0	0
36	0	0	0	0	0	0	0	0	0	0	0	0	0	0	0	0	0	0	0	0	0	0	0	0	0	0	0	0	0	0	0	0	0	0	0	0	0	0	0	0	0	0	0	-0.0317662007623888	0	0	0	0	-0.111181702668361
37	0	0	0	0	0	0	0	0	0	0	0	0	0	0	0	0	0	0	0	0	0	0	0	0	0	-0.00943663300934227	0	0	0	0	0	0	0	0	0	0	0	0	0	0	0	0	0	0	0	0	0	0	0
38	-25.9594287793565	-0.380514064686685	-0.0955109837631328	-3.89606201953245	-0.143266475644699	-1.24164278892073	-0.0477554918815664	-0.382043935052531	-0.955109837631328	-0.0462256215157203	-0.0477554918815664	-0.0955109837631328	0	-7.44067751132927	-1.09531657254434	0	-0.0477554918815664	-0.143266475644699	-0.189492097160419	0	0	-0.907354345749761	0	0	-0.573065902578797	0	0	0	-0.238777459407832	0	-0.429799426934097	0	-1.2863385400706	0	-0.143266475644699	-0.573065902578797	-1.38490926456543	-0.0477554918815664	-0.0955109837631328	-0.0477554918815664	0	-0.0955109837631328	0.0492853622474125	-0.0477554918815664	0	-0.573065902578797	-0.0477554918815664	0	-0.0955109837631328
39	0	-0.0469704086425552	0	-0.272953989148777	0	-0.125254423046814	-0.00521893429361724	0	0	-0.126039125987154	-0.0156568028808517	-0.0574082772297897	-0.0104378685872345	-0.00521893429361724	-0.177443765982986	-0.0260946714680862	-0.00521893429361724	-0.15213379745524	0	-0.0156568028808517	0	-0.00521893429361724	0	-0.0156568028808517	0	0	0	-0.00521893429361724	0	0	0	0	-0.0104378685872345	0	0	0	0	0	0	0	0	0	0	0	0	0	0	0	0
40	0	0	0	0	0	0	0	0	0	0	0	0	0	0	0	0	0	0	0	0	0	0	0	0	0	0	0	0	0	0	0	0	0	0	0	0	0	0	0	0	0	-0.00708340711882415	0	0	0	0	0	0	0
41	0	0	0	0	0	0	0	0	0	0	0	0	0	0	0	0	0	0	0	0	0	0	0	0	0	0	0	0	0	0	0	0	0	0	0	0	0	0	0	0	0	0	0	0	0	0	0	0	0
42	0	0	0	-0.00456746140495113	0	0	0	0	0	0	0	0	0	0	0	0	0	0	0	0	0	0	0	0	0	0	0	0	0	0	-0.0274047684297068	0	0	0	0	0	0	0	0	0	0	0	0	0	0	0	0	0	0
43	0	0	0	0	0	0	0	0	-0.00147898364244091	0	0	-0.00147898364244091	0	-0.00443695092732274	-0.00221986185390207	0	0.000738105430979761	-0.00295796728488183	0	0	0	0	0	0	0	0	0	0	0	0	0	0	0.00147621086195952	0	-0.00147898364244091	0	0	0	0	0	0	0	0	0	0	0	0	0	0
44	0	0	0	0	0	0	0	0	0	0	0	0	0	0	0	0	0	0	0	0	0	0	0	0	0	0	0	0	0	0	0	0	0	0	0	0	0	0	0	0	0	0	0	0	0	0	0	0	0
45	0	-0.180980229643298	0	-0.0541858574911948	0.0164365548980934	-0.1025915339318	0	-0.0135464643727987	0	0	0	0	0	0	0	0	0	0	0	0	0	0	0	0	0	0	0	0	0	0	0	0	0	0	0	0	0	0	0	0	0	0	0	0	0	0	0	0	0
46	0	0	0	0	0	0	0	0	0	0	0	0	0	0	0	0	0	0	0	0	0	0	0	0	0	0	0	0	0	0	0	0	0	0	0	0	0	0	0	0	0	0	0	0	0	0	0	0	0
47	0.00785299296211641	0	0.0127194098193844	0	0	0.0308586041722511	0	0	0.0254388196387688	0	0	0	0.0127194098193844	-0.002433208428634	0	0.0230056112101348	0	0	0	0	0	0.0127194098193844	0	-0.002433208428634	-0.00486641685726799	0	0.0102862013907504	0	0	0	0.0205724027815008	0.00541978453348241	0	0.0127194098193844	0	0	0	0	0	0	0	0	0	0	0	0	0	0	0
48	0	0	0	0	0	0	0	0	0	0	0	0	0	0	0	0	0	0	0	0	0	0	0	0	-0.0786472670074715	-0.035138588171008	-0.157294534014943	-0.024261418461893	-0.013384248752778	0.0108771697091157	0	0	0.111278776134818	0	0.0502008032128514	0.0719551426310825	0.0610779729219673	0	0.150602409638554	0.0610779729219673	0	0	0.0502008032128514	0.0610779729219673	0	0	0	-0.0393236335037357	-0.0786472670074715
49	0	0	0	0	0	0	0	0	0	0	0	0	0	0	0	0	0	0	0	0	0	0	0	0	0	0	0	0	0	0	0	0	0	0	0	0	0	0	0	0	0	0	0	0	0	0	0	0	0
50	0.00316626032992433	-0.00138890817928027	0.00316626032992433	0	0	0	0	0.00316626032992433	0	0.0162197456209855	0	0	-0.00138890817928027	0.00633252065984865	0.00316626032992433	0	0	-0.00277781635856054	0	0	-0.00138890817928027	0	-0.00277781635856054	0	0	0	0	0	0	0	0	0	0	0	0	0	-0.00138890817928027	0	0	0	0	0	0	0	0	0	0	0	0
51	0	0	0	0	0	0	0	0	0	0	0	0	0	0	0	0	0	0	0	0	0	0	0	0	0	0	0	0	0	0	0	0	0	0	0	0	0	0	0	0	0	0	0	0	0	0	0	0	0
52	0	0	0	0	0	0	0	0	0	0	0	0	0	0	0	0	0	0	0	0	0	0	0	0	0	0	0	0	0	0	0	0	0	0	0	0	0	0	0	0	0	0	0	0	0	0	0	0	0
53	0	-0.00132488937173746	0	0	0	0	0	0	0	0	0	0.0544333764036853	0.00298805809656238	-0.00264977874347492	0	0	0	-0.00264977874347492	0	0	0.0129388424048995	-0.00132488937173746	0	-0.00927422560216222	-0.00132488937173746	0.00200144807791237	0	0	0	0	-0.00132488937173746	0	0	0.00862589493659967	0	0	-0.00132488937173746	0	0	-0.00893594624907476	0	0	0	0	0	0	0	0	0
54	0	0	0	0	0	0	0	0	0.00734915852134931	0	0	0	0	0	0	0	0	0	0	0	0	0	0	0	0	0	0	0	-0.00369658435605501	0	0	0	0	0	0	0	0	-0.00369658435605501	0	0	0	0	0	0	0	0	0	0	0
55	0	0.0054265796394732	0	-0.0139324277255312	0	0	0	0	0	-0.00696621386276559	0	0	0	0	0	0	0	0	0	0	0	-0.00696621386276559	-0.104493207941484	0	0.0735490840438367	0	0.0402576489533011	0	0	-0.0278648554510623	0	0	0	0	-0.0557297109021247	0	0	0	0	0.0913684571855491	0	0	-0.0139324277255312	0.0402576489533011	0	0	0	0	-0.083594566353187
56	0	0	0	0	0	0	0	0	0	0	0	0	0.0123456790123457	0	0	0	0	0	0	0	0	0	0	0	0	0	0	0	0	0	0	0	0	0	0	0	0	0	0	0	0	0	0	0	0	0.0123456790123457	0	0	0
57	-0.00267265341030575	-0.00801796023091726	0	0	0	0	0	0	-0.00267265341030575	0	0	-0.0015364538028167	0	0	0	0.000624048339883394	-0.00267265341030575	0	0.00339282079120581	0	-0.00267265341030575	-0.0076019280043283	-0.00267265341030575	0	0	0	-0.00801796023091726	0	0.0150116179266234	0	0	0	0	0	0	0	-0.00801796023091726	-0.00267265341030575	0	-0.00801796023091726	0	0	-0.00267265341030575	0	0.00339282079120581	0	-0.00267265341030575	0.0101784623736174	0
58	0	0	0	0	0	0	0	0	0	0	0	0	0	0	0	0	0	0	0	0	0	0	0	0	0	0	0	0	0	0	0	0	0	0	0	0	0	0	0	0	0	0	0	0	0	0	0	0	0
59	0	0	0	0	0	0	0	0	-0.00509502216334641	0	0	0	0	0	0	0	0	0	0	0	0	0	0	0	0	0	0	0	0	0	0	0	0	-0.0101900443266928	0	0	0	-0.00254751108167321	0	0	0	0	0	0	0	0	-0.00254751108167321	0.0149365197908887	0
60	0.00284486927825666	0.00568973855651333	0	-0.00214982102739947	-0.00537455256849867	0.00568973855651333	0	0	0	0	0	0	0	0	0	0	-0.0032247315410992	0	0	0.00284486927825666	0	0	0	0	0	0	0	0	0	0	0	0.00568973855651333	0	-0.00107491051369973	0	-0.00214982102739947	0	0	0	-0.00107491051369973	0.00284486927825666	0	0	0	-0.00107491051369973	0	0	0	0
61	0	0	0	0	0	0	0	0	0	0	0	0	0	0	0	0	0	0	0	0	0	0	0	0	0	0	0	-0.0195160031225605	0	0	0	0	0	-0.00975800156128025	0	0	0	0	0.00406369850782825	0.279618333336031	-0.0195160031225605	0.0138217000691085	-0.00975800156128025	0.027643400138217	-0.00975800156128025	0	0	0	0
62	0	0.00819000819000819	-0.046242774566474	0	-0.00337068545161031	-0.528866228288193	0	0	1.66513754953061	0.00771659731197301	-0.0101120563548309	-0.0115606936416185	0.00819000819000819	-0.0183020645448391	1.97153853801253	0.0423986782368285	0	0.00819000819000819	0.251968205725432	0.0900900900900901	2.30685546292483	0.0635980173552428	0	0.0327600327600328	0.0245700245700246	0.058807099269527	0	0	-0.0067413709032206	0.362367622483229	0.0245700245700246	0	-0.0115606936416185	-0.0842955409429398	0	0	0.0130093309284061	0	0	0.101177372853673	0	0.0327600327600328	0.801257379292064	0.0178286536668039	0	0	0	0.637400406186534	0.0048193227383979
63	0	0	-0.0214477211796247	0	0	0	0	0	0	0	0	0	0	0	0	0	0	0	0	0	0	0	0	0	0	0	0	0	0	0	0	0	0	0	0.0159210316828531	0	-0.0214477211796247	0	0.0159210316828531	0	0	0	0	0	0	0	0	0	0
64	0	0	0	0	0	0	0	0	0	0	0	0	0	0	0	0	0	0	0	0	0	0	0	0	0	0	0	0	0	0	0	0	0	0	0	0	0	0	0	0	0	0	0	0	0	0	-0.000841149009547041	0	0
65	0	0	0	0	0	-0.0272430076280421	0	-0.0181620050853614	0	0	0	0	0	0	0	0	0	0	0	0	0	0	0	0	0	0	0	0	0	0	-0.0252748485473769	0.019146084625694	-0.00908100254268071	-0.0181620050853614	-0.00908100254268071	0	0	0	0	0.0009840795403326	-0.00908100254268071	0.0967145026688026	0	0	0.0775684180431088	-0.00908100254268071	0	0	0
66	0.0181695326431557	-0.0014756227127848	0	0	0	0	-0.0050528942008964	0	0	0	0	0	0	0	0	0	0	-0.0014756227127848	0	0	0	0	-0.00699057700341941	-0.00737811356392398	0	0	-0.0014756227127848	0.0018631592732894	0	-0.00295124542556959	0.107154036585646	0.0018631592732894	-0.0014756227127848	0	0	0	0	0	0	0	0	0	0	0	0	0	0	0	0
67	0	0	0	0	0	0	0	0	0	0	0	0	0	0	0	0	0	0	0	0	0	0	0	0	0	0	0	0	0	0	0	0	0	0	0	0	0	0	0	0	0	0	0	0	0	0	0	0	0
68	0	0	0	0	0	0	0	0	0	0	0	0	0	0	0	0	0	0	0	0	0	0	0	0	0	0	0	0	0	0	0	0	0	0	0	0	0	0.0222982012784302	0	0	0	0	0	0	0	0	0	0	0
69	0	0	0	0	0	0	-0.0051495957567331	0	0	0	0	0	0	0	0	0	0	0	0	0	0	0	0	0	0	0	0	0	0	0	0	0	0	0.006792094002581	0	0	0	0	0	0	-0.0051495957567331	0	0.061128846023229	0	0.0016424982458479	0	0	0	0
70	0	0	0	0	0	0	0	0	0	0	0	0	0	0	0	0	0	0	0	0	0	0	0	0	0	0	0	0	0	0	0	0.00343271029641453	0	0	0	0	0	0	0	0	0	0	0	0.00171635514820727	0	0	0	0	0
71	0	0	0	0.00717566016073479	0	0	0	0	0	0	0	0	0	0	0	0	0	0	0	0	0	0	0	0	0	0	0	0	0	0	0	0	0	0	0	0	0	0	0	0	0	0	0	0	0	0	0	0	0
72	-0.0136944092574207	-0.0326249027881353	0.00140975875189371	-0.0154062104145982	-0.0224547766468312	-0.0362498667060131	-0.0327255835898966	-0.0140971324644658	-0.0228574998538764	-0.0140971324644658	-0.0120832889020043	-0.000201361603522581	-0.0102708069430655	-0.0239652162004862	-0.031013782432719	-0.025777698159425	0.00996876453778162	-0.0206422946878923	-0.0395727882186069	-0.0383643910702359	-0.0240658970022474	-0.0089617289929331	-0.0136944092574207	-0.0102708069430655	-0.00855900578588791	-0.00201384356246148	-0.0256770173576637	-0.0261804213664702	-0.0154062104145982	-0.0211456986966988	-0.0223540958450698	0.00996876453778162	-0.0395727882186069	-0.0073506086375168	-0.0059408498856231	-0.0103714877448268	0	-0.0137950900591819	-0.0154062104145982	-0.00362496391787775	0	-0.00513540347153275	-0.000604084810567798	0.00322224071083259	-0.00171180115717758	-0.00684720462871033	0.00825696338060404	-0.0136944092574207	0.00664584302518775
73	0	0	0	0	0	0	0	0	0	0	0	0	0	0	0	0	0	0	0	0	0	0	0	-0.000871778777417443	0	0	-0.000871778777417443	0	0	0	0	0	0	0	0	0	0	0	0	0	0	0	0	0	0	0	0	0	0
74	0	0	0	0	0	0	0	0	0	0	0	0	0.226244343891403	0	0	0	0	0	0	0	0	0	0	0	0	0	0	-0.0098173964264677	0	0	0	0	0.177157361759064	0	0	0	0	0	0	0	0	-0.0098173964264677	0	0	0	0	-0.0098173964264677	-0.0589043785588062	0
75	0	0	-0.00718132854578097	0	0	-0.00718132854578097	0	0	0	0	-0.00718132854578097	0	0	-0.0215439856373429	0	0	0	0	0	0	0	-0.00718132854578097	0	0	0	-0.00718132854578097	0	0	0	0	0	0	0	0	0	0	0	0	0	0	0	0	0	0	0	0	0	0	0
76	0	0	0	0	0	0	0	0	0	0	0.0112956060092624	0	0	0	0	0.0056478030046312	0	0	-0.0222358293032041	0	0	0.0169434090138936	0	0	0.0056478030046312	0	0	0	0	0	0	-0.00929454410261177	0	0	0	0	0	0	0	0	0	0	0	0	0	0.0112956060092624	0	0.0169434090138936	0
77	0	0	0	0	0	0	0	0	0	0	0	0	0	0	0	0	0	0	0	0	0	0	0	0	0	0	0	0	0	0	0	0	0	0	0	0	0	0	0	0	0	0	0	0	0	0	0	0	0
78	0	0	0	0	0	0	0	0	-0.0890736342042755	0	0	0	0	1.21499000324681	0.0899280575539568	0	0	0.842461422785763	0.0899280575539568	0	0.570968403424529	0	0	0.300329807412977	0	0.151019327056169	0	0.179856115107914	0	0.179856115107914	-0.0296912114014252	0	0	0	0.211256173208701	0	0	0	0	0.0899280575539568	0	-0.0593824228028504	0	0	0	0.179856115107914	4.57800030759241	0.179856115107914	0
79	0.0121138703815869	0	0	0	0.0726832222895215	-0.00731850117096019	0	0	0	0	0	0	0	-0.000250894710040202	0	0.0749554595398147	0	0	0	0.0121138703815869	0	0	0	0	0.0532508507369744	0.0242277407631738	0	0.0121138703815869	0	-0.0219555035128806	-0.00731850117096019	0	0.0653647211185613	0.149660024369589	-0.0025231319603335	0	0	0	0	0	0	0	0	0	-0.0292740046838408	0	0	0	0
80	0	0	0.00526149636956751	0	0	0	0	0	0.0157844891087025	0	0	0	0	0	0	0.00526149636956751	0	0	0	-0.00315985717445571	0	0	0	0	0	0	-0.00105821797934392	0	0	0	-0.00315985717445571	0	0	0	0	0	0	0.010522992739135	0	-0.00631971434891143	0	0	0	0	0	0	0	0	0
81	0	0	0	0	0	0	0	0	0	0	0	-0.00223828815721736	0	0	0	0	0	0	0	0	0	0	0	0	0.0228258388495777	0	0	0.0456516776991554	0	0	0	0.0228258388495777	-0.00447657631443472	0	0	0	0.055047787605429	0	0.233177922087616	0	0.0662392283915158	0	0	0.0389368132275033	0.0228258388495777	0	0.0228258388495777	0	0
82	0	-0.0252908447142135	0	0	0	0	0	0	0	0	0	0	0	-0.0252908447142135	0	0.0725689404934688	-0.0252908447142135	0	0.0219872510650419	0	0	0	0	0	0	0	0	0	0	0	-0.0252908447142135	0	0	0	0	0	0	0	0	0	0	0	0	0	0	-0.0252908447142135	0	0	0.0725689404934688
83	0	0	0	0	0	0	0	0	0	0	0.0249376558603491	0	0	0	0	0	0	0	0	0	0	0	0	0	0	0	-0.0139742873113471	0	0	0	0	0	0	0	0	0	0	0	0	0	0	0	0	0	0	-0.0139742873113471	0	0	0
84	0	0	0	0	0	0	0	0	0	0	0	0	0	0	0	0	0	0	0	0	-0.0091441111923921	0	0	0	0	0	0	0	0	0	0	0	0	0	0	0	-0.0091441111923921	0	0	0	0	0	0	0	0	0	-0.0091441111923921	0	0
85	0	-0.0115727346371948	0	0	0	0	0	0	0	0	0	0	-0.0462909385487791	0	0	0	0	0	0	0	0	-0.0115727346371948	0	0	0	-0.0231454692743895	0	0	0	0	-0.104154611734753	0	0	0	-0.0115727346371948	0	0	0	-0.0115727346371948	0	-0.0231454692743895	0	0	0	0	0	0	-0.0347182039115843	0
86	0	0	0	0	0	0	0	0	0	0	0	0	0	0	0	0	0	0	0	0	0	0	0	0	0	0	0	0	0	0	0	0	0	0	0	0	0	0	0	0	0	0	0	0	0	0	0	0	0
87	0	0	0	0	0	0	0	0	0	0	0.0040581965579229	0	0	0.00565995019243831	0	0.00565995019243831	0	0	0.00565995019243831	0	0	0	0	0	0	0	0	0	0.00565995019243831	0	0	0	0	0	0	0	0	0	0	0	0	0	0	0	0	0	0	0	0
88	0	0	0	-0.0133725595078898	-0.0088014620984999	0	-0.0133725595078898	0	-0.0133725595078898	0	-0.0267451190157796	0	0	0	0	0.00897182845863987	0	0	0	0	0	0	0	0	0	0	0	0	0	0	0	0	0	0	0	0	-0.0133725595078898	0.0179436569172797	0	0	0	0	0	0	0	0	-0.0133725595078898	0	0
89	0	0	0	0	0	0	0	0	-0.00461105731544243	0	0	0	0	0	0	0	0	0	0	0	0	0	0	0	0	0	0	0	0	0	0	0	0	0	0	0	0	0	0	0	0	0	0	0	0	0	0	0	0
90	0	0	0	0	0	0	0	0	0	0	0	0	0	0	0	0	0	0	0	0	0	0	0	0	0	0	0	0	0	0	0	0	0	0	0	0	0	0	0	0	0	0	0	0	0	0	0	0	0
91	0	0	0	0	0	0	0	0	0	0	0	0	0	0	0	0	-0.0572573718866304	0	0	0	0	0	0	0	0	0	0	0	0	0	0	0	0	0	0	0	0	0	0	0	0	-0.0286286859433152	0	0	0	0	0	0	0
92	-0.0144618388228063	0	0	0	0	0	0.0155884645362432	0	0	0	0	0	0	0	0	0	0	0	0	0	0	0.0311769290724864	0	0	0	0	0	0	0	0.00779423226812159	0	0	0	0	0	0	0	0.00779423226812159	0	-0.00361545970570158	0	0	0	0	0	0	-0.0108463791171047	0	0
93	0	0	0	0	0	0	0	0	0	0	0	0	0	0	0	0	0	0	0.0210304942166141	0	-0.0135722041259501	0	0	0	0	0	0	0	0	0.010515247108307	0	-0.00678610206297503	0	0	0	0	0	0	0	0	0	0	0	0	0	0	0	0	0
94	0	0	0	0	0	0	0	0	0	0	0	0	0	0	0	0	0	0	0	0	0	0	0	0	0	0	0	0	0	0	0	0	0	0	0	0	0	0	0.0192882630919086	0	0	0	0	0	0	0	0	0	0
95	0	0	0	0	0	0	0	0	0	0	0	0	0	0	0.010078613182826	0	0	0	0	0	0	0	0	0	-0.00893734918223255	0	0	0	-0.0066548211810456	-0.00893734918223255	0	0	0	0	0	0	0	0	0	0	0	0	0	0	-0.0167334343638717	0	0	0	0
96	0.00874967188730423	0	0	0	0	0	0	0	0	0	0	0	0	0	0	0	0	0	0	0	0	0	0	0	0	0	0	0	0	0	0	0	0	0	0	0	0	0	0	0	0	0	0	0	0	0	0	0	0
97	0	0	-0.0146070698217937	0	0	0	0.012156576707999	0	0	0	0	0	0	0	0	0	0	0	0	0	0	0	0	0	0	0	0	0	0	0	-0.0146070698217937	0	0	-0.0146070698217937	0	0	0	0	0	0	0	0	0	0	0	0	0	0	0
98	0	0	0	0	0	0	0	0	0	0	0	0	0	0	0	0	0	0	0	0	0	0	0	0	0	0	0	0	0	0	0	0	0	0	0	0	0	0	0	0	0	0	0	0	0	0	0	0	0
99	0	0	0	0	0	0	0	0	0	0	0	0	0	0	0	0	0	0	0	0	0	0	0	0	0	0	0	0	0	0	0	0	0	0	0	0	0	0	0	0	0	0	0	0	0	0	0	0	0
100	0	0	0	0	0	0	0	0	0	0	0	0	0	0	0	0	0	0	0	0	0	0	0	0	0	0	0	0	0	0	0	0	0	0	0	0	0	0	0	0	-0.00332115576220525	0	0	0	0	0	0	0	0
101	-0.635673323016802	-0.238028201811673	-0.052118946358978	-0.397179395445625	-0.105169344236962	-0.157288290595938	-0.238493927571176	0.293872954246678	0.293407228487175	-0.371352785145889	-0.158685467874448	0.213133043030943	0.080274185456232	-0.238493927571176	0.372749962424399	0.080274185456232	0.373215688183903	0.213133043030943	0.159616919393456	-0.07887700817772	-0.159151193633952	0.213598768790447	-0.158685467874448	0.080274185456232	0.478850758180367	-0.424403183023873	-0.212201591511936	-0.371352785145889	0	0.080274185456232	-0.105635069996464	0.134256034853222	0.133324583334216	0.00139717727850996	0.42673181182139	-0.106100795755968	-0.132393131815208	0	0.02768951333775	0	-0.26525198938992	-0.106100795755968	-0.530038253020337	0.505608819999111	0.638933403333327	0.213133043030943	0.345991900605655	0.719673314549063	0.268512069706445
102	0	0	0	0	0	0	0	0	0	0	0	0	0	0	0	0	0	0	0	0	0	0	0	0	0	0	0	0	0	0	0	0	0	0	0	0	0	0	0	0	0	0	0	0	0	0	0	0	0
103	0.0249625561657514	0	0	0	0	0	0	0	0	0	0	0	0	0	0	-0.0118483412322275	0	0	0	0	0	0.0249625561657514	0	0	0.0748876684972541	-0.0118483412322275	0	0	0	0	0	0	0	0	0	0.0774194158998471	0.0249625561657514	0	0	0	0	0.0499251123315027	0	0	0	0	0.0499251123315027	0	0
104	0	0	0	0	0	0	0	0	0	0	0	0	0	0	0	0	0	0	0	0	0	0	0	0	0	0	0	0	0	0	0	0	0	-0.0376860749952892	0	0	0	0	0	-0.0753721499905785	0	0	0	0	-0.0188430374976446	0	0	0	0
105	0	0	0	0.0120091269364717	0	0	0	0	0	0	0	0	0.00300228173411793	0	0	0	0	0	0.00300228173411793	0	0	0	0	0	0	0	-0.002389486260454	0	0	0	0	0	-0.002389486260454	0	0	0	0	0	0	0	0	0	0	0	0	0.00300228173411793	-0.002389486260454	0	0
106	0	0	0	0	0	0	0	0	0	0	0.119365372290476	0	0	0	0	0	0	0	0	0	0	0	0	0	0	0	-0.0497265042267529	0	0	0	0	0	0	0	0	0	0	0	0	0	0	0	0	0	0	0	0	0	0
107	0	0	0	0	0	0	0	0	0	0	0	0	0	0	0	0	0	0	0	0	0	0	0	0	0	0	0	0	0	0	0	0	0	0	0	0	0	0	0	0	0	0	0	0	0	0	0	0	0
108	0.057309432303559	0	0.0122848808132949	0	-0.103825709999029	0.0286697247706422	-0.0355130024233047	0	0.122833799514086	-0.0341413451689997	0.0095565749235474	0.141976966598906	-0.00682826903379993	1.02778499931613	0	0.20748632519057	-0.0136565380675999	0	0.674296787476914	0.00681326041493741	0.0655243672105268	0.0095565749235474	0	0.0286697247706422	-0.00682826903379993	0.0095565749235474	0	0.0218414557368423	0	0	0.0095565749235474	-0.00682826903379993	0.0095565749235474	-0.0136565380675999	0	0.047782874617737	3.8701727061349	-0.001371657254305	0.095565749235474	0	0	0.7699375798067	0.0846225084387587	0.0245547530077272	0.0191131498470948	0	0	-0.101112412728144	-0.00682826903379993
109	0	0.00897102359379205	-0.0133725595078898	0	0	0	-0.0133725595078898	-0.0088030718281955	0	-0.0133725595078898	0	-0.0133725595078898	0	-0.0267451190157796	0	0	0	0	0.00897102359379205	0	0	0	0	0	0	0	0	0	0	0	0	0	0	0	0	0	0	0	0	-0.0133725595078898	0.0179420471875841	0	0	0	0	0	0	0	0
110	0	0	0	0	0	0	0	0	0	0	0	0	0	0	0	0	0	0	0	0	0	0	0	0	0	0	0	0	0	0	0	0	0	0	0	0	0	0	0	0	0	0	0	0	0	0	0	0	0
111	0	0	0	0	0	0	0	0	0	0	0	0	0	0	0	0	0	0	0	0	0	0	0	0	0	0	0	0	0	0	0	0	0	0	0	0	0	0	0	0	0	0	0	0	0	0	0	0	0
112	0	0	0	0	0	0.0334560053529609	-0.0181587071000545	0	0	-0.0181587071000545	0	0	0	0	0	-0.0181587071000545	0.0669120107059217	-0.0181587071000545	0	0	-0.0181587071000545	0	0	0	0	0	0	0	-0.0181587071000545	0	0	-0.0363174142001089	0.0334560053529609	0	0	0.0334560053529609	0	0	0	0	0.115665314311788	0	0	0	0	0	0	0.100368016058883	0
113	0.036718627604574	0	-0.475220638153428	0.120192307692308	-0.0678886625933469	0.021133610110188	0.120192307692308	0.172495952791268	0	0.240384615384615	-0.0678886625933469	-0.271554650373388	-0.203665987780041	0.224799597890229	-0.339443312966735	0.0523036450989611	0.224799597890229	0.036718627604574	0.0523036450989611	-0.203665987780041	-0.605449370724319	0.0523036450989611	0	0.12231382839835	0.486317823385034	1.10286437934095	0.120192307692308	0.27710324298919	-0.7512631207896	0.104607290197921	-0.0678886625933469	0.120192307692308	1.45446563789231	0.104607290197921	0	0.480769230769231	0.036718627604574	0.0523036450989611	0.261518225494803	0.120192307692308	0.637680166066113	-0.543109300746775	-0.312761110240746	0.344991905582537	-0.114643715076505	0.172495952791268	-0.271554650373388	0.120192307692308	-0.135777325186694
114	0	0	0	0	0	0	0	0	0	0	0	0	0	0	0	0	0	0	0	-0.00118298395873752	0	0	0	0	0	0	0	0	0	0	0	0	0	0	0	0	0	0	0	0	0	0	0	0	0	0	0	0	0
115	0	0	0	0	0	0	0	0	0	0	0	0	0	0	0	0	0	0	0	0	0	0	0	0	0	0.0698080279232112	0	0	0	0	0	0	0	0	0	0	0.0349040139616056	0	0	0	0	0	0	0	0	0	0	0	0
116	0	0	0	0	0	0	0	0	0	0	0	0	0	0	0	0	0	0	0	0	0	0	0	0	0	0	0	0	0	0	0	0	0	0	0	0	0	0	0	0	0	0	0	0	0	0	0	0	0
117	0.0205867215645908	0	0.0102933607822954	0	0	0.0102933607822954	0	0	-0.00428100518001627	0	-0.00428100518001627	-0.00856201036003254	-0.00428100518001627	0.0102933607822954	0	0	0	0	0	0	0	-0.00428100518001627	0.0102933607822954	0	0	0	-0.00856201036003254	0	0	0	0	0.0205867215645908	-0.00428100518001627	0.0205867215645908	0	-0.0128430155400488	-0.00856201036003254	0	0.0205867215645908	0	0	-0.00856201036003254	0	0	0.0205867215645908	0	0	0	0.0102933607822954
118	0.0027717321880053	0	-0.0412144525346888	0	-0.0274763016897926	0	0	0	0.0604960677555959	0	0	0	0.0027717321880053	0	0	0.0302480338777979	0	-0.0137381508448963	0	-0.0137381508448963	0	0	0	0.0165098830329016	0	0	0	-0.0274763016897926	0	0.0302480338777979	0	0	0	0	0	0	0	0	0	0	0	-0.0274763016897926	0	0	0	0	0	0	0
119	0	0	0	0	0	0	0	0	0	-0.0567966679288148	0	0	-0.0189322226429383	0	0	0	-0.0378644452858766	0	-0.0378644452858766	0	0	0	0	0	0	0	0	0	0	0	0	0	0	0	0	0	0	-0.0189322226429383	0	0	0	0	0	0	0	0	0	0	0
120	0	0	0	0	0	0	0	0	0	0	0	0	0	0	0	-0.0344785790467405	0	0	0	-0.00834794223223975	0	0	0	0	0	0	-0.00834794223223975	0	0	0	0	-0.0010868101177815	0	0	0.003457296702223	0.0161524794055888	0	0	0	-0.00834794223223975	0	0	-0.0166958844644795	0	0	0	0	0	0
121	0	0	-0.0194024058983314	0	0	0	0	0	0	0	0	0	0	0	0	0	0	0	0	0	0	0	0	0	0	0	0	-0.0194024058983314	0	-0.0097012029491657	0	0	0	0	0	0	0	0	0	0	0	0	0	0	0	0	0	-0.0097012029491657	0
122	0	0	0	0	0	0	0	0	0	0	0	0	0	0	0	0	0	0	0	0	0	0	0	0	0	0	0	0	0	0	0	0	0	0	0	0	0	0	0	0.00111706881143878	0	0	0	0	0	0	0	-0.00114399460034549	0
123	0	0	0	0	0	0	0	0	0	0	0	0	0	0	0	0	0	0	0	0	0	0	0	0	0	0	0	0	0	0	0	0	0	0	0	0	0	0	0	0	0	0	0	0	0	0	0	0	0
124	0	0	0	0	0	0	0	0	0	0	0	0	0	0	0	0	0	0	0	0	0	0	0	0	0	0	0	0	0	0	0	0	0	0	0	0	0	0	0	0	0	0	0	0	0	0	0	0	0
125	0	0	0	0	0	0	0	0	0	0	0	0	0	0	0	0	0	0	0	0	0	0	0	0	0	0	0	0	0	0	0	0	0	0	0	0	0	0	0	0	0	0	0	0	0	0	0	0	0
126	-0.00233091019765279	0.0390338911812842	-0.0084093680359921	0.067747156768948	0.0204538325008141	0.0182577811486018	7.77531926109783	0.076268976016797	0.027064394191034	1.36055144595597	-0.007464943073969	0.0189773036869106	-0.00280312267866403	-0.028870532066688	0.0319511170100532	-0.00140156133933202	-0.0112124907146561	0.0063257678956369	0.0873470209299501	0.057216704855315	-0.00981092937532411	0.44712130096837	0.0196968262252195	-0.30210002576186	-0.0136558521241657	0.0164964585401154	-0.573155875738407	-0.018542574943185	-0.00524648408817361	0.180561847290352	3.74837372855985e-05	-0.00140156133933202	0.0505311756905238	1.20930095187411	0.0029155738905208	0.0154546584699377	-0.0350390334833004	-0.0122542907848337	-0.00280312267866403	-0.00104180007017761	0.393201925862379	-0.0048867228190192	1.08469685151899	-0.180066814131819	0.0066855291647913	0.0035226452169729	0.109546686891611	0.00456444528715046	-0.0108152457082161
127	0	0	0	0	0	0	0.0371609067261241	0	0	0	0	0	-0.0228154232261008	0	0	0	0	0	0	0	0	0	0	0	0	0	0	0	0	0	0	0	0	0	0	0	0	0	0	0	0	0	0	0	0	0	0	0	0
128	0	0	0	0	0	0	0	0	0	0	0	0	0	0	0	0	0	0	0	0	0	0.016273393002441	0	0	0	0	0	0	0	0	0	0	0	0	0	0	0	0	0	0	0	0	0	0	0	0	0	0	0
129	0	-0.508240073706288	-0.0904977375565611	0	0	0	0	0	0	-0.765991969033297	-0.0904977375565611	-0.167254157770447	-0.0904977375565611	0	0	0	-0.0904977375565611	0	0	0	0	0	0	0	0	0	0.0694927032661571	0	0	0	-0.0904977375565611	0.0347463516330785	0	0.0694927032661571	0	0.104239054899236	-0.0904977375565611	0	0.0347463516330785	0	-0.180995475113122	0	0	0.0347463516330785	-0.180995475113122	-0.257751895327008	-0.146249123480043	-0.0904977375565611	-0.633484162895928
130	0	0	0	0	-0.00435293605536935	0.013531799729364	0	0	0	0.006765899864682	0	0	0	0	0	0.006765899864682	0	-0.00193997224605669	0	0	-0.00870587211073869	0	0	0	0.006765899864682	0.013531799729364	-0.00435293605536935	0	0	0.027063599458728	0	0	0	0	0	0	0	0	0	0	0	0	0	-0.00870587211073869	0	0	0	0	0
131	0	0	0.00660022440762986	0	0	0	0	0	0	0	0	0	0	0	0	0	0.0132004488152597	0	0	0	0	0	0	0	0	0	0	0	0	0	0	0	0	0	0	0	0	0	0	0	0	0	0	0	0	0	0	0	0
132	0	0	0	0	0	0	0	0	0	0	0	0	0	0	0	-0.0038311240517968	0	-0.0019155620258984	0	0	0	0	0	0	0	0	0	0	0	0	-0.0038311240517968	0	0	0	0	0	0	0	0	-0.0019155620258984	0	0	0	0	0	0	0	0	0
133	0	0	0	0	0	0	0	0	0	0	0	0	0	0	0	0	0	0	0.00168636907873657	0	0	0	0	0	0	0	0	0	0	0	0	0	0	0	0	0	0	0	0	0	0	0	0	0	0	0	0	0	0
134	0	0	0	0	0	0	0	0	0	0	0	0	0	0	0	0	0	0	0	0	0	0	0	0	0	0	0	0	0	0	0	0	0	0	0	0	0	-0.00969555943377933	0	0	0	0	0	0	0	0	0	0	0
135	0	0.12686463028503	0.0057024072470723	0	0	0	0.0983525940496681	0	0	0	0.024588148512417	0	-0.0377714825306893	-0.056657223796034	0	-0.0377714825306893	0	0	0	0	0	0	0.0057024072470723	0	0	-0.0944287063267233	0	0	0.049176297024834	0	0	0	0	0	0	0	0	0	0	0	0.183521854081064	0	0.0114048144941447	0	-0.0377714825306893	-0.0188857412653447	0	0	0
136	0	0	0	0	0	0	0	0	0	0	0	0	0	0	0	0	0	0	0	0	0	0	0	0	0	0	0	0	0	0	0	0	-0.0540248514316586	0	0	0	0	0	0	0	0	0	0	0	0	0	0	0	0
137	0	0	0	0	0	0	0	0	0	0	0	0	0	0	0	0	0	0	0	0	0	0	0	0	0	0	0	0	0	0	0	0	0	0	0	0	0	0	0	0	0	0	0	0	0	0	0	0	0
138	0	0	0	0	0	0	0	0	0	0	0	0	0	0	0	0	0	0	0	0	0	0	0	0	0	0	0	0	0	0	0	0	0	0	0	0	0	0	0	0	0	0	0	0	0	0	0	0	0
139	0	0	0	0	0	0	0	0	0	0	0	0	0	0	0	0	0	0	0	0	0	0	0	0	0	0	0	0	0	0	0	0	0	0	0	0	0	0	0	0	0	0	0	0	0	0	0	0	0
140	0	0	0	0	0	0	0	0	0	-0.0586510263929619	0	0	0	0	0	0	0	-0.100469376748576	0	0	0	-0.0293255131964809	0	-0.266879023831193	0	-0.0586510263929619	0	0	0	0	0	0	0.0359195402298851	0	-0.0293255131964809	0	-0.146627565982405	0	0	0	-0.0227314861630768	0	0	-0.146627565982405	0	0	0.181683351872449	0	-0.0161374591296727
141	0	0	0	0	-0.00390762377398304	0.00186779730663628	0	0	0	0	0	0	0	0	0	0	0	0	0	0	0	0	0	0	0	0	0	0	-0.00390762377398304	0	0	0	0	0	0	0	0	0	0	0	0	0	0.00373559461327257	0	0.00186779730663628	0	0	0	0
142	0	0	0	0	0	0	0	0	0	0	0	0	0	0	0	0	0	0	0.011063170704724	0	0	0.0221263414094479	0	0	0.011063170704724	0	0	0	0	0	0	0	0	0.011063170704724	0	0	0.011063170704724	0	0	0	0.0221263414094479	0	0	0	0.0553158535236199	0	0.0553158535236199	0.011063170704724	0
143	0.00093681260500127	0	0	0	-0.00471898447454108	0.00988891452681544	0	-0.00235949223727054	0	0.00093681260500127	0	-0.00378217186953981	0	0.00659260968454363	0	-0.00235949223727054	-0.00471898447454108	0.00988891452681544	0.00659260968454363	0	-0.00707847671181162	-0.00235949223727054	0.00988891452681544	0	0.00659260968454363	0.00329630484227181	0.000450945577733281	0	0	0	0	-0.00378217186953981	0	0	0.00988891452681544	0	0	0	0.00329630484227181	0	0	0	0	0.00281043781500382	0	0.00329630484227181	0.00187362521000255	0	0
144	0	0	-0.0096461111784449	0	0	0	0.0323901110957491	0	-0.00572836111588475	0.00762369444232675	-0.0114567222317695	0	-0.00572836111588475	0	0	0	0	0.0381184722116338	-0.0171850833476542	-0.0114567222317695	0	0	0.12387444440367	0	0	0	0	0	0.0114143610952108	0	0	0	0	0.0190380555375375	0	-0.00572836111588475	0.0152473888846535	0.0381184722116338	-0.00572836111588475	0.0762369444232675	0	0.0133096944216528	0.0171427222110955	-0.0114567222317695	0.0228710833269803	-0.00572836111588475	0	0.316319777651722	0
145	0	0	0	0	0.00626919942323365	0	0	0	0	0	0	0.0068672997622383	0	0	0.000598100339004599	0.007177204068056	0	0	0	0	0	0.018807598269701	0	0	0	-0.0119402985074627	0	0	0	0.0068672997622383	0	-0.00288196033188015	0.0131364991854719	-0.0498436910800525	0	0.0394094975564157	0	-0.0271592947431359	0	0	0	0.00626919942323365	0.36930637390441	0.0023924013560185	0	0.262751691982068	0.201212481882481	0.0650843955883553	0.00626919942323365
146	0	0	0	-0.0505050505050505	0	0	0	-0.101010101010101	-0.0505050505050505	0.132802124833997	0	0	0	0	0	-0.0505050505050505	0	0	0	0	-0.101010101010101	0	0	0	0	0	0	0	0	0	0	0	0	0	0	0	0	0	0	0	0	0	0	0	0	0	0	0	0
147	0	0	0	0	0	-0.00235190818150459	0	0	0	0	0	0	0	0	0	0	0	0	0	0	0	0	0	0	0	0	0	0	0	0.00148235991698784	0	0	0.00662783019110435	0	0	0	-0.00156793878766973	0	0	-0.00156793878766973	0	0	0	-8.55788706818901e-05	0	0	-0.000783969393834865	0	0
148	0	0	0.0819000819000819	0	0	0	0	0.0819000819000819	0.0409500409500409	-0.0095565749235474	0	-0.0095565749235474	0	0.0409500409500409	-0.0191131498470948	0	0	0	0	0	0.0409500409500409	0	0	0	-0.0191131498470948	0	0.0409500409500409	0	0	0	0	0	0	-0.0095565749235474	0	0	0	0	0	0	0	0	0.0409500409500409	0	0	0	0	0	0
149	-0.117785630153121	0	0.0840180402680737	0	-0.0588928150765607	-0.147232037691402	0	0	0	0	0	0	-0.0294464075382803	0	-0.0294464075382803	0	0	0	0	0	0	0	0	0	0	0	0	0	-0.0294464075382803	0	0	0	0	0	0	0	0	0	0	-0.0588928150765607	0	0	-0.0294464075382803	0	0	0	0	0	0
150	0	0	0	0	0	0	0	0	0	0	0.059816846095214	0	0	-0.0481173747265908	0	-0.0630715862503942	0	0	0	0	0	0	0	0	0	0	-0.0315357931251971	0	0	0	0.0929800092980009	0	0	0	0	0	0	0.154424225470805	0.0464900046490005	0.416782671763414	0	0	0	0	0	0	0	0	0
151	0	0	0	0	0	0	-0.00259895522000156	0	0	0	0	0	0	0	0	0	0	0	0	0	0	0.00265456186456425	0	0.00265456186456425	0	0	0	0	0	0	0	0	0	0	0	0	0	0	0	0	0	0	0	0	0	0	0	0	0
152	0	0	0	0	-0.0256673511293634	0	0	0	0	0	0	0	0	0	0	0	0	0	0	0	0	0	0	0	0	0	0	0	0	0	0	0	0	0	0	0	0	0	0	0	0	0	0	0	0	0	0	0	0
153	0	0	0	0	0	0	0	0	0	0	0	0	0	0	0	0	0	0	0	0	0.0130174433741213	0	0	0	0	0	0	0	0.0267340251211322	0	0.127644065960435	0.0034956918644474	0	0	0	0	0	0.225491367597399	0	-0.0123183050012318	1.18505237027471	0.157174644573124	24.3798754879457	0.41326133362633	0.23487842272331	0.023504518967464	0.039052330122364	0.03022971698558	0
154	0	0	0	0	0	0	0	0	0	0	0	0	0	0	0	0	0	0	0	0	-0.063626723223754	0	0	0	-0.0212089077412513	0	0	0	0	0	0	0	0	0	0	0	0	0	0	0	0	0	0	0	0	0	0	0	0
155	0	0	0	0	0	0	0	0	0	0	0	0	0	0	0	0	0	0	0	0	0	0	0	0	0	0	0	0	0	0	0	0	0	0	0	0	0	-0.0365363536719035	0	0	0	0	-0.137494240117313	-0.0365363536719035	0	-0.182681768359518	0.107677405625014	0	0.116328580195315
156	0	0.0596302921884317	0	0	0	0	0	0	0	0	0	-0.0963391136801541	0	0	0	0	-0.0963391136801541	0	0	0	0	0	0	0	0	0	0	0	0	0	0	0	0	0	0	0	0	0	0	0	0	0	0	0	0	0	0	0	0
157	0	0	0	0	0	0	0	0	0	0	0	0	0	0	0	0	0	0	0	0	0	0	0	0	0	0.00672675904749092	0	0	0	0	0	0	0	0	0	0	0	0	0	0	0	0	0	0	0	0	0	0	0
158	0	0	0	0	0	0	0	0	0	0	0	0	0	0	0	0	0	0	0	0	0	0	0	0	0	0	0	0	0	0	0	0.0327439423706614	0	0	0	0	0	0	0	0	0	0	0	0	0	0	0	0	0
159	0	0	0	0	0	0	0	0	0	0	0	0	0	0	0	0	0	0	0	0	0	0	0	0	0	0	0	0	0	0	0	0	0	0	0	0	0	0	0	0	0.203252032520325	0	0	0	0	0	0	0	0
160	0	0	0	0	0	0	0	0	0	0.0945179584120983	0	0	0	0	0	0	0	0	0	0.0472589792060491	0	0	0.0472589792060491	0.0945179584120983	0	0	0.0945179584120983	0	-0.0510594842992086	0.0472589792060491	0	0	0	0	0	0	0	0	0	0	0	0	0	0	0	0	0	0	0
161	0	0	0	0	0	0	0	0	0	0	0	0	0	0	0	0	0	0	-0.0673854447439353	0	0	0.156494522691706	0	0	0	0	0	0	0	0	0	0	0	0	0	0	0	0	0	0	0	0	0	0	0	0	0	0	0
162	0	0	-0.0687757909215956	0	0	0	0	0	0	0	0	0	0	-0.0515818431911967	0	0	0	0	0	0	0.0346440325653906	0	0	0	0	0	0	0	0	0	0	0	0	0	0	0	0	0	0	0	0	0	0	0	0	0	0	0	0
163	0	0	0	0.0252206809583859	0	0.0252206809583859	0	0	0	0	0	1.27184472811029e-05	0.0756620428751576	-0.0504286434694907	0	0	0	0	0.0252206809583859	0	0	0	0	0	0	0	0	0	0.0252206809583859	0	0	0	0	0	0	0	-0.0504286434694907	0	0.0252206809583859	0	-0.0504286434694907	0	0.0252206809583859	0	0.100882723833544	0	0	0	0
164	0	0	0	0	0	0	0	0	0	0	0	0	0	0	0	0	0	-0.0434216239687364	0	0	0	0	0	0	0	0	0	0	0	0	0	0	0	0	0	-0.0434216239687364	0	0	0	0	0	0	0	0	0	0.123245042697931	0	0	0
165	0	-0.042571306939123	0	0	0	0	0	-0.042571306939123	0	0	0	0	0	0	0	0	0	0	0	0	0	0	0.0462320850670365	0	0	0	0	0	0	0	0	0	0	0	0	0	0	0	0	0	0	0	0	0	0	0	0	0	0
166	0	0	0	0	0	0	0	0	-0.056980056980057	0	0	-0.0190437899087368	0	0	0	0	0	0	0	0	-0.0142450142450142	0	0	0	0	0.023691252826306	0	0.0379362670713202	0	0	-0.00967320770052102	0	0.0569044006069803	0	0.0189681335356601	0	0	0	0	0	0	0	0	0	0	0	0	0	0
167	0	0	0	0	0	0	0	0	0	0.0161461043810567	0	0	-0.0106923282544774	0	0	0	0	0	0	0	0.0268384326355341	0	0	0	0	0	0	0	0	0	0	0	0	0.013419216317767	0	0	-0.0106923282544774	0	-0.00534616412723871	0	-0.0106923282544774	0	0.013419216317767	0	0	0	0	0	0
168	0	0	-0.0621195179525407	-0.0248478071810163	0	0	0	0	0	0	0	0	0	0	0	0	0	0	0	-0.0124239035905081	0.0107631040792164	0	0	0	0	0	0	0	0	0	0	-0.0124239035905081	0	0	-0.0919497236674317	-0.0124239035905081	0	0	0	0	-0.0016607995112917	0	0	-0.0124239035905081	0	-0.0140847031017999	0	-0.086967325133557	0
169	0	0	0	0	0	0	0	0	0	0	0	0	0	0	0.15015015015015	0	0	0	0	0	0	0	0	0	0	0	0	0	0	0	0	0	0	0	0	0	0	0	0	0	0	0	0	-0.174114915844457	0	0.15015015015015	0	0	0
170	0	0	0	0	0	0	0	0	0	0	0	0	0	0	0	0	0	-0.0173505682311096	0	0	0	0	0	0	0	0	0	-0.00433764205777739	0	0	0	-0.00433764205777739	0	0	0	0	0	0	0	0	0	-0.00867528411555478	0	0	0	0	0.0168399781080285	0	0
171	0	0	0	0	0	0	0.0960393192614419	0	-0.0212111570686181	0	-0.0424223141372362	0	0	0	0	0	0	0	0	0	0	0	0	0	0	0	0	0	0	0	0.0146563095412575	0	0	0	0	0	0	0	0	0.0146563095412575	0	0	0	0	0	0	0.00154661448653631	0	0
172	0	0	0	0	0	0	0	0.0156213387487308	0.00781066937436538	0	0	-0.00797893560998963	0	0	0	0	0	-0.00797893560998963	0	0	0	0.0232637418874719	0	0	0	0	0	0	0	0	0	0	0	0	0	0.00781066937436538	0.0312426774974615	0.00781066937436538	0	0	0	0	0	0	0	0	0	0	0
173	0	0	0	0	0	0	0	0	0	0	0	0	0	0	0	0	0	0	0	0	0	0	0	0	0	0	0	0	0	0	0	0	0	0	0	0	0	0	0	0	0	0	0	0	0	0	0	0	0
174	0	0	0	0	0	0	0	0	0	0	0	0	-0.0961538461538462	0	0	0	0	0	0	-0.0961538461538462	0	0	0	0	0	0	0	0	0	-0.0961538461538462	0.472813238770686	-0.0961538461538462	0	-0.288461538461538	0.0220494635388248	0	0	-0.052054919076195	-0.895390070921986	-0.384615384615385	0.871522094926348	0	-0.458719767230406	0	-0.0961538461538462	-0.052054919076195	0	0.118203309692671	0
175	0	0	0	0.0547345374931582	0	0	0	0	0	0	0	0	0	0.0547345374931582	0	0	0	0	0	0	0	0	0	0	0	0	0	0	0	0	0	0	0	0.0239558363543463	0	0	0	0	0	0	0	0	0	0	0	0	0	0	0
176	0	0	0	0	0	0	0	0	0	0	0	0	0	0	0	0	-0.00419137833476539	0	0	0	0	0	0	0	0	0	0	0	0	0	0	-0.0125741350042962	0	0	-0.00209568916738269	0	0	-0.00131095285246655	0	0	-0.00209568916738269	0	0	0	-0.00419137833476539	0	0	0	0
177	0	0	0	0	0	0	0	0	0	0	0	0	0	0	0	0	0	0	0	0	0	0	0	0	0	0	0	0	0	0	0	0	0	0	0	0	0	0	0	0	0	0	0	0	0	0	0	0	0
178	0	0	0	0.0199920031987205	0	0	0	0	0	0	0	0	0	0	0	0	0	0	0	0	0	0	0	0	0	0	0	0	0	0	0	0	0	0	0	0	0	0	0	0	0	0	0	0	0	0	0	0	0
179	-0.343053173241852	0	0	0	0	0	0	-0.171526586620926	0	0	0	-0.137097572239081	0	0	0	0	0	0	0	0	-0.0857632933104631	0	0	0	0	0	-0.171526586620926	0	0	0	0	0	0	0	0	0	0	0	-0.0857632933104631	0	-0.257289879931389	-1.14873334212957	-2.79452269428685	-0.068239543475393	0	-0.171526586620926	-0.257289879931389	0.27481362976646	-0.257289879931389
180	-0.094879272371319	-0.0855493922832206	0	0	0	0	-0.152439024390244	0	0	0.0668896321070234	0	0	0	0	-0.152439024390244	0	0	0	0	0	0	0	0	0	0	0	0	-0.0762195121951219	0	0	0	0	0	0	-0.0762195121951219	-0.533536585365854	-0.0762195121951219	0	0	-0.228658536585366	0	0	0	0	0	-0.046649400440493	0	0	0.0668896321070234
181	0	0	0	0	0	0	0	0	0	0	0	0	0.0733137829912024	0	0	0	0	0.0478100849549871	0	0	0	0	0	0	0	0	0	0	0	0	0	0.0733137829912024	0	0	0	0	0	0	0	0	0.0733137829912024	0	0	0.0733137829912024	-0.0255036980362153	0	0	0	0
182	0	0	0	0	0	0	0	0	0	0	0	0	0	0	0	0	0	0	0	0	0	0	0	0	0	0	0	0.0081843672946263	0	0	0.0253164556962025	0	0	0	0	0	0.210716012864247	0	0	0	0	0	0	0	0.0081843672946263	0	0	0	0
183	0.169182389937107	0	-0.12	0.117924528301887	-0.08	0.01125786163522	0.239402515723271	0.258364779874214	0.117924528301887	-0.106666666666667	-0.02874213836478	-0.0266666666666667	-0.12	0.09688679245283	-0.0266666666666667	-0.133333333333333	0.0245911949685537	-0.0133333333333333	0.01125786163522	-0.0133333333333333	0.0512578616352203	-0.0533333333333333	0.0322955974842767	0.235849056603774	0	0.182515723270441	0.003553459119497	-0.030817610062893	0.395251572327044	1.02072327044025	2.20025157232705	0.269025157232707	0.99405660377358	1.16264150943396	1.16767295597484	0.651540880503143	-0.0343710691823899	-0.24	-0.12	-0.0210377358490566	0	0.0645911949685537	-0.04	-0.0266666666666667	0	-0.04	0	-0.0533333333333333	0.0835534591194967
184	0	0	0	0	0	0	0	0	0	0	0	0	0.099403578528827	0.198807157057654	0	0	0	0	0.0510242848665145	0	0	0	0	0	0.201452148261856	0	0	0.397614314115308	0	0	0	0	1.64941651494035	0.099403578528827	0	0	0.225641795093012	0.099403578528827	0	0	0.373424667284152	0.298210735586481	0.198807157057654	0.497017892644135	0.475473237017181	0.0026449912042019	0	0	0
185	0	0	0	0	0.0250031253906738	0	0	0.0125015626953369	0	0	0	0	0	0	0	0	0	0	0	0	0	0	0	0	0	0	0	0	0	0	0	0	0	0	0	0	0	0	0	0	0	0	0	0	0	0	0	0	0
186	-0.0209511837418814	0.0274574409665019	0	0	0	0	0	0	0.0274574409665019	0	0	0	0	0	0	0	0	0	0	0	0	0	0	0	0	0	0	0	0	-0.0209511837418814	-0.0353961102591423	0	0	-0.0838047349675257	0	0	0	0	0.195843519854094	-0.0209511837418814	0	-0.0209511837418814	-0.030322265102541	0	-0.0209511837418814	0	0.143793462057131	0.0549148819330038	0
187	0	0	0	0	0	0	0.0288267512251369	0	0.0288267512251369	-0.130293159609121	0	-1.3542375793792	0	0	0	0	0	0.115307004900548	0	-0.195439739413681	0.0576535024502739	-0.0651465798045603	0	-0.130293159609121	0.0288267512251369	0	-0.130293159609121	0	0	-0.0651465798045603	0	0	0	0	0	0	0	0	0	0	0	0	0	0	0	0	0	0	0
188	0	0	-0.0683526999316473	0	-0.0344543948469015	0	0	0	0	0	0	0	-0.0683526999316473	0	0	0	0	0	-0.0683526999316473	0	0	0	0	0	0	0	0	0	0	0	0	0	-0.136705399863295	0	0	0	0	0	0	0	0	0	0	0	0	0	0	0	-0.205058099794942
189	0	0	0.628930817610063	5.28014922160844	0	0.172657053351508	0	0	-0.0760456273764259	1.88679245283019	0	0	0.552885190233637	0	0	0.552885190233637	0	1.1818160078437	28.6185044359949	0	3.62149365090753	0	-0.532319391634981	0	0	0	0	0	0	0	0	-0.0760456273764259	0	0	0	0	0	0	0	0	-0.0760456273764259	0	0	0	0	0	0	-0.0760456273764259	0
190	0	0.0341081566473568	0	0.0142755174875089	0	-0.0031612741428311	0	0	0.153103991606444	0	-0.0237593399160022	0.00555712167233889	-0.04359197907585	0.0142755174875089	0.0285510349750178	0	0.91622810210916	0.0198326391598478	0	-0.00871839581517001	0	0	0.138828474118935	0	-0.00871839581517001	0.0713775874375446	0.0142755174875089	0	0	0	0.0142755174875089	0	0	0	-0.0150409441008322	0	-0.00871839581517001	0	0	0	0	0	0	-0.01743679163034	0	-0.00871839581517001	0	0.0142755174875089	0
191	-0.0825082508250825	-0.0053893356698712	0.0627633820496727	-0.0068200803761897	-0.126290222494858	-0.0308571832705552	0.0207938842839722	-0.0556096585180799	-0.0459280887292531	-0.00825082508250825	0.0193631395776536	0.0021461170594778	0.0179323948713351	-0.00753545272934897	0.0448309871783377	-0.0495049504950495	0.0179323948713351	-0.00825082508250825	-0.033003300330033	-0.0577557755775578	-0.0240371028943655	0.0050076064721149	-0.0247524752475248	-0.0165016501650165	0.0297600817196397	-0.0495049504950495	-0.033003300330033	-0.0322879279768738	0.0111123144951453	0	0	-0.00825082508250825	0.0179323948713351	-0.00825082508250825	-0.0165016501650165	-0.00825082508250825	0	0	0	0	-0.0247524752475248	0	0.0179323948713351	0	0	0	0	0	0
192	0	0	0	0	0	0	0	0	0	0	0	0	0	-0.0280112044817927	0	0	0	0	0	-0.0560224089635854	0	0	0	0	0	0.0074019245003701	0	0	0	0	0.0222057735011103	0	0.0074019245003701	0	0	0	0	0	0.0074019245003701	0	0.0074019245003701	0	0	0	0	0	-0.0280112044817927	0	0
193	0	0	0	0	0	0.555741349732766	0	0	0	0	0	0	0	0	0.0865800865800866	0	0	0	0	0	0	0	0	0	0	0	0	0.0288600288600289	0	0	0	0	0	0	0	0	0	-0.0214592274678112	0	0	-0.0281168521511869	0	0	0.0288600288600289	0	0	0	-0.0214592274678112	0
194	0	0	0	0	0	0	0	0	0	0	0	0	0	0	0	0	0	0	0	0	0	0	0	0	0	0	0	0	0	0	0	0	0	0	0	0	0	0	0	0	0	0	-0.0152183838076396	0	0	0	0	0	0
195	0	0	0	0	0	0	0	0	0	0	0	0	0	0	0	0	0	0	0	0	0	0	0	0	0	0	0	0	0	0	0	0	0	0	0	0	0	0	0	0	0	0	0	0	0	0	0	0	0
196	0	0	0	0	0	0	0	0	0	0	0	0	0	0	0	0	0	0	0	0	0	0	0	0	0	0	0	0	0	0	0	0	0	0	0	0	0	0	0	0	0	0	0	0	0	0	0	0	0
197	0	0	0	0	0	0	0	0	0	0	0	0	0	0	0	0	0	0	0	0	0	0	0	0	0	0	0	0	-0.13271400132714	0	0	0	0	0	0	0	0.28169014084507	0	0	0.074488069758965	0	0	0	0	0	0	0	0	0
198	0	0	0	0	0	0	0	0	0	0	0	0	0	0	0	0	0	0	0	0	0	0	0	0	0	0	0	0	0	0	0	0	0	0	0	0	0	0	0	0	0	0	0	0	0	0	0	0	-0.00483418737310258
199	0	0	0	0	-0.00705218617771509	0	0	0	0	0	0	0	0	0	0	0	0	0	0	0	0	0	0	0	0	0	0	0	0	0	0	0	0	0	0	0	0	0	0	0	0	0	0	0	0	0	0	0	0
200	0	0	0	0	0	0	0	0	0	0	0	0	0	0	0	0	0	0	0	0	0	0	0	0.00290326326791313	0	0	0	0	0	0	0	0	0	0	0	0	0	0	0	0	0.00222960483464231	0	0	0	0	0	0	0	0
201	0	0	0	0	0	0	0	0	0	0	0.00724795245343191	0	0	0	0	0	0	0	0	0	0	0	0	-0.0043010752688172	0	0	0	0	0	0	0	0	0	0	0	0	0	0	0	0	0	0	0	0	0	0	-0.0043010752688172	0	0
202	0	0	0	0	0	0	0	0	0	0	0	0	0	0	0	0	0	0	0	0	0	0	0	0	0	0	0	0	0	0	0	0	0	0	0	0	0	0	0	0	0	0	0	0	0	0	0	0	0
203	0	0	0	0	0.0107677398514052	0	0	0	0.0107677398514052	0	0	0	0.0107677398514052	0	0	0	0	0.0080338257502012	0	-0.0405049618578276	0	0	-0.0123865717321235	0	0	0	-0.0231543115835287	-0.0067508269763046	0	0.0107677398514052	0	0	0	0	0	-0.0324711361076264	0	-0.0067508269763046	0	0	0	0.0430709594056208	0	0	0	0	0	0	0.0080338257502012
204	0	0.0268817204301075	0	0	0.0268817204301075	0	0	0	0	0.0268817204301075	0	0	0	0	-0.124469630921243	0	0	0	0	0	0	0	0	0	0	0	0	0	-0.0216216216216216	0	0.0268817204301075	0	0	0	0	0	-0.302702702702703	0	0	0	0	-0.0432432432432432	0	0	0	0	0	0	-0.0274629468177854
205	0	0	-0.00560852495793606	0	-0.00560852495793606	0	0	0	0	0	0	0	0	-0.00560852495793606	0	0	-0.00560852495793606	0	0	0.00255540679159451	0	-0.00560852495793606	-0.0112170499158721	0	0	0	0	0	0	0	0	-0.00560852495793606	0	0.0163278634990611	0.00816393174953057	-0.00560852495793606	0	0	0	0.010719338541125	-0.0168255748738082	0.00816393174953057	0	0.00816393174953057	0	0	0	0.005110813583189	0
206	0	0	0	0	0	0	0	0	0	0	0	0	0	0	0	0	0	0	0	0	0	0	0	0	0	0	0	0	0	0	0	0	0	0	0	0	0	0	0	0	0	-0.0125376128385155	0	0	0	0	0	0	0
207	0	0	0	0	0	0	0	0	0	0	0	0	0	0	0	0	0	0	0	0	0	0	0	0	0	0	0	0	0	0	0	0	0	0	0	0	0	0	0	0	0	0	0	0	0	0	0	-0.0255819902788437	0
208	0	-0.0022311366272009	-0.0551065393093314	0.0322754196184858	-0.0205999830636447	0	0.0161377098092429	0	-0.0205999830636447	0.080688549046214	-0.13750647156391	0	-0.0551065393093314	0.145239388283186	0.552104899930987	0.037257446291724	-0.220426157237326	-0.0367376928728876	-0.0940753688094203	-0.0551065393093314	-0.183688464364438	-0.00446227325440179	0.06231970260977	-0.14695077149155	-0.0228311196908456	0.099577148901495	-0.001711383208364	-0.110213078618663	0	-0.0367376928728876	0	0	0	0	0	0	0	0	-0.0183688464364438	0	0	0	0	0	0	0	0	0	0
209	0	0	0	0	-0.686106346483705	0	-0.0857632933104631	-0.171526586620926	-0.0857632933104631	0	-0.0857632933104631	0.033478406427854	-0.171526586620926	-2.05605077692299	0	-0.071091367337364	0	0	0.0669568128557081	0	0	-0.223811473503535	0.215542364540223	0	0	0	0	-0.257289879931389	0	0.0669568128557081	0	-0.104569773765218	0	0	0	0.033478406427854	-0.0857632933104631	0	0.033478406427854	0	0	0	0	0	0	0	-0.108704328246874	0	-0.190333067075681
210	0	0	0	0	0	0	0	0	0	0	0	0	0	0	0	0	0	0	0	-0.0151034586920405	0	0	0	0	0	0	0	0	0	0	0	-0.030206917384081	0	0	0	0	0	0	0	0	0	0	0	0	0	0	0	0	0
211	0	0	0	0	0	0	0	0	0	0	0	0	0	0	0	0	0	0	0	0	0	0	0	0	0	0	0	0	0	0	0	0	0	0	0	0	0	0	0	0	0	0	0	0	0	0	0	0	0
212	0	0	0	0	0	0	0	0	0	0	0	0	0	0	0	0	0	0	0	0	0	0	0	0	0	0	0	0	0	0	0	0	0	0	0	0	0	0	0	0	0	0	0	0	0	0	0	0	0
213	0	0	0	0	0.0248941996514812	0	0.0630167100137063	0	0	0.174259397560368	0	0	-0.0583294447036864	-0.0116658889407373	-0.0349976668222119	0	0	-0.0116658889407373	0.0015624217700066	0	-0.0233317778814746	0	-0.0116658889407373	-0.0101034671707307	0	0	-0.0116658889407373	0	0	0	-0.0116658889407373	0	0	-0.0349976668222119	0	0	-0.0116658889407373	0	0	-0.0349976668222119	0	0	-0.0116658889407373	0	0	0	0	0	0
214	0.120073900844709	0	0	-0.44346495548881	-0.0959692898272553	0	-0.0959692898272553	0	0	0	-0.191938579654511	0	0	0	0	-0.035932339404901	0	0	0	-0.61129892412587	0.528055671171185	0	-0.191938579654511	6.2538739553421	0.180110851267064	0.31201248049922	0	-0.0959692898272553	0.46801872074883	-0.227870919059411	-0.023655456774893	0	0	0	0	0	0	-0.191938579654511	-1.91893664230254	-0.0959692898272553	0	-0.263803258464312	0	0	0	0	0	2.72576738002342	-0.227870919059411
215	0	0	0.0277777777777778	0	0	0	0	0	0	0.0138888888888889	0	0	-0.00911244760342628	0	0	0.0416666666666667	0	0	0	0	0	0	0	0	0	0	0	0	0.00477644128546262	0	0	0	0	-0.00911244760342628	0.0138888888888889	0	0	0	0	0	0	0	0	0	0	0	0	0	0.0138888888888889
216	0	0	0	-0.0312891113892365	0	0	0	0	0	0	0	0	0	0	0	0	0	0	0	0	0	0	0	0	0	0	0	0	0	0	0	0	0	0	0	0	0	0	0	0	0	0	0	0	0	0	0	0	0
217	-0.769386148459671	-0.068237378027306	-0.712025316455696	-0.0791139240506329	0	-0.237341772151899	-0.316455696202532	-0.158227848101266	0	0.16366612111293	-0.0791139240506329	0	0	0	0	0	0	0	0	0	0	0	0	0	0	0	0	0	0	0	0.16366612111293	0	0	0	0.0845521970622971	0	0	0	0	0	0	0	0	0	0	0	0	0	0
218	0	0	0	0	0	0	-0.0900900900900901	0	0	0	0	0	0.114155251141553	0	0	0	0	0	0	0	0	0	0	0	0	0	0	0	-0.0900900900900901	0	0	0	0	0	0	0	0	0	0	0	0	0	0	0	0	0	0	0	0
219	0	0	0	0	0	0.0555555555555556	0	0	0	0	0	-0.0342407122068139	-0.0171203561034069	0	0	0	0.0384351994521487	0	0	-0.0171203561034069	-0.0513610683102209	0	0	0	0.0041944872453347	0	0	0	-0.0171203561034069	0.0555555555555556	0	0	-0.0342407122068139	0	0	-0.0342407122068139	0	-0.0342407122068139	0	0	0	-0.0171203561034069	0.111111111111111	0	0	0	0	0.0384351994521487	-0.0342407122068139
220	0	0	0	0	0	0	0	0	0	0	0	0	0	0	0	0	0	0	0	0	0	0	0	0	0	0	0	0	0	0	0	0	0	0	0	0	0	0	0	0	0	0	0	0	0	0	0	0	0
221	0	0	0	0	0	0	0	0	0	0	0	0	0	0	0	0	0	0	0	0	0	0	0	0	0	0	0	0	0	0	0	0.0801282051282051	0	0	0	0	0	0	0	0	0	0	0	0	0	0	0	0	0
222	0.00818866688503112	0	0	0	0	0	0	0	0	0	0	0	0	0	0	0	0	0	0	0	-0.00589657409045345	0	0	0	0	0	0	0	0	-0.00589657409045345	0	0	0	0	0	0	0	0	0	-0.0176897222713603	0	0	-0.0117931481809069	0	-0.0176897222713603	0	0	0	0
223	0	0.0128754327833143	0	0	0	-0.0111890198418619	0	0	0	-0.00372967328062062	0	0	0	0	0	0	0	0	0	0	0	0	0	0	0	0	0	0	0	0	0	0	0	0	0	0	0	0	0	0	0	0	0	0	0	-0.00745934656124124	0	0	0
224	0	0	0	0	0	-0.0186358553857622	0.0253485424588086	0	0	-0.0372717107715244	0	0	0	0	0	0	0	-0.0186358553857622	0	0	0	0	0	0	0	-0.0186358553857622	0	0	0	0	0	0	0	-0.0186358553857622	0	0	0	0	0	0	0	0	0	0	-0.0372717107715244	0	0	0	0
225	-0.00387776626508091	0	0.00308674952695861	-0.0139290315840791	-0.0104467736880593	0	-0.0108422820571205	-0.00696451579203956	0.0131380148459568	0	0.0026912411578975	-0.00696451579203956	-0.0174112894800989	0	-0.00696451579203956	-0.00348225789601978	-0.0174112894800989	0.0394140445378703	0	-0.00348225789601978	-0.0208935473761187	-0.00696451579203956	0	0	0.00656900742297839	-0.00348225789601978	0.0131380148459568	-0.00696451579203956	0	-0.00348225789601978	0	-0.00348225789601978	0	0	-0.00696451579203956	0	-0.00348225789601978	0.0022957327888363	0	0.00308674952695861	0.0335587364274836	-0.0155110650603238	0.00617349905391724	0	0.00656900742297839	0	0.00656900742297839	0	0
226	0	0	0	0	0	0	0	0	0	0	0	0	0	0	0	0	0.0743770918557084	0	0	0	0	0.0371885459278542	0	0	0	0	0	0	0	0	0	0	0	-0.0564971751412429	0	0	0	0.0371885459278542	0	0	0	0	0	0	0	0	0	0	0
227	0	0	0	0	0	0	0	0	0	0	0	0	0	0	0	0	0	0	0	0	0	0	0	0	0	0	0.0160359204618345	0	0	0	0	0	0	0	0	0	0	0	0	0	0	0	0	0	0	0	0	0	0
228	0	0	0	0	0	0	0	0	0	0	-0.0148126203525404	0	0	0	0	0	0	0	0	0	0	0	0.0405186385737439	0	-0.002592808748905	0.0405186385737439	0	0.315245331323746	0.0607779578606159	0	0	0	0	0	0.0405186385737439	0.0825647535979425	-0.159883870977035	0.0257060182212035	0	0	-0.0148126203525404	0.020259319286872	-0.0296252407050807	-0.353975412010514	0.020259319286872	0	-0.516914235888458	0	0
229	0	0	0	0	0	-0.00899847026005579	0	0.0161238310222509	-0.0037462189957214	-0.00993502500898616	0.00431569651540401	-0.00899847026005579	0	-0.00899847026005579	0.0322476620445018	0	0	0	0	0	0.0393730228066969	0	0.00806191551112544	0	0.0322476620445018	0	0	0	0	0	0	0	0	0	0	0	0	0	0	0	0	0	0	-0.00899847026005579	0	0	0	0	0
230	0	0	0	0	0	0	0	0	0	0	0	0	0	0	0	0	0	0	-0.0296120817293456	0	0	0	0	0	0	0	0	0	0	0	0	0	0	0	0	0	-0.0592241634586911	0	0	0	0	0	0	0	0	0	0	0	0
231	0	0	0	0	0	0	0	0	0	0	0	0	0	0	0	0	0	0	0	0	0	0	0	0	0	0	0	0	0	0	0	0	0	0	0	0	0	0.0270913069843865	0	0	0	0	0.0178030977390066	0	0	0	0	0	-0.0117398450340455
232	0	0	0	0	0	0	0	0	0	0	0	0	0	0	0	0	0	0	0	0	0	0	0	0	0	0	0	0	0	0	0	0	0	0	0	0	0	0	0	0	0	0	0	0	0	0	0	0	0
233	0	0	0.004683515853906	0.0409500409500409	0	0	0	0	0	-0.023977416441571	-0.133377792597533	-0.0333444481493831	0.0409500409500409	0.012289108654564	0	0	0	0.109400376155962	0.0895056747007399	0.0409500409500409	0	0.094189190554646	-0.387844269138033	-0.37203228266916	-0.0666888962987663	-0.069610973245518	-0.118166606996217	0.0076055928006578	0	-0.069610973245518	-0.305944187237951	-0.0333444481493831	0	-0.0666888962987663	-0.751711121834496	-0.0333444481493831	0	0	0.0152111856013156	-1.76897622712894	-0.0666888962987663	0	0	0	0.0409500409500409	-0.021055339494819	0	0	-0.555727147924552
234	0	0	0	0	0	0	0	0	0	0	0	0	0	0	0	0	0	0	0	0	0	0	0	0	0	0	0	0	0	0	0	0	0	0	0	0	0	0	0	0	0	0	0	0	0	0	0	0	0
235	0	0	0	0	0	0	0	0	0	0	0	0	0	0	0	0	0	0	0	0	0	0	0	0	0	0	0	0	0	0	0	0	0	0	0	0	0	0	0	0	0	0	0	0	0	0	0	0	0
236	0	0	0	0	0	0	0	0	0	0	0	0	0	0	0	0	0	0	0	0	0	0	0	0	0	0	0	0	0	0	0	0	0	0	0	0	0	0	0	0	0	0	0	0	0	0	0	0	0
237	-0.058457035964277	-0.279677855936002	-0.074566394262267	0.291477018033861	-0.54739491741664	-0.75035128099031	-0.416526585290163	-0.245627305954965	-0.501060308265237	-0.279677855936002	-0.181189872763008	0.13453199889659	-0.30209087617668	0.0941777869728599	0.319547170787216	0.09019085548774	-0.12935976345643	0.12838996931141	0.44793714009861	-0.47315178786938	0.13636383228164	-1.14112444398469	1.94001930967898	0.96279007620427	-0.48909951380987	0.210930226543914	-0.251607703182649	-0.211415123616427	-0.615657649736213	0.0782300610323781	-0.416526585290163	-0.430480845488086	-0.313890038274543	0.120416106341162	-0.120901003413677	-0.336141426157715	-0.511027636978037	-0.322025533602289	-0.39061153063688	-0.653856763559875	-0.018264456398055	0.0881973897451802	0.75385331540292	0.66533266094273	-0.18533843660563	-0.89948406951484	0.9767443364022	0.64308127305955	-2.19044170890659
238	0	0.00976848686138517	0	0	0	0	0	0	0	0	0	0	0	0	0	0	0	0	0	0	0	0	0	0	0	0	0	0	0	0	0	0	0	0	0	0	0	0	0	0	0	0	0	0	0	0	0	0	0
239	0	0	0	0	0	0	-0.00906180148613544	0	-0.00906180148613544	0	0	0	0	0	0	0	0	-0.00604120099075696	0	-0.00302060049537848	0	0	0	0	0	0	0	0	0	0	0	0	0	-0.00604120099075696	0	0	0	-0.00302060049537848	-0.00604120099075696	0	0	0	0	-0.00302060049537848	0	0	-0.00302060049537848	0	0
240	0.0349406009783368	0	0	0	0	0	0	0	0	0	0	0	0	0	0	0	0	0	0	0	0	0	0	0	0	0	0	0	0	0	0	0.0349406009783368	0	0	0	0	0	0	0	0	0	0	0	0	0	0	0	-0.0243546030199708	0
241	0	0	0	0	0	0	0	0	0	0	0	0	0	0	0	0	0	0	0	0	0	0	0	0	0	0	0	0	0	0	0	0	0	0	0	0	0	0	0	0	0	0	0	0	0	0	0	0	0
242	0	0	0	0	0	0	0	0	0	0.0288399713912107	0	0	0	-0.0123971420108511	0	0	0	0.0288399713912107	0	-0.0123971420108511	-0.0412371134020619	0	0	0	0.236918342135112	0	0	0.140154169586545	0	0	0	0	0	0	0	0	-0.0412371134020619	0	0	0.0700770847932726	0	0	0	0.168994140977756	0	0	0.0350385423966363	0	0
243	0	0.371142618849041	0	0	0.227272727272727	0	0	0	0	0	0	0	0	0	0	0	0	0	0	0	0	0	0	0	0	0	0	0	0	0	0	0	0	0	-0.166805671392827	0	-0.0834028356964137	0	0.575479566305254	0	0	0	0	0	0	0	0	0	0
244	0	0	0	0	0	0	0	0	0	0.0377857547704515	0	-0.0122970978848992	0	0	0	0	0	0	0	0	0	0	0	0	0	0	0	0	0	0	0	0	0	0	0	0	0	0	0	0	0	0	0	0	0	0	0	0	0
245	0	0	0	0	0	0	0	0	0	0	0	0	0	0	0	0	0	0	0	0	0	0	0	0	0	0	0	0	0	0	0	0	0	0	0	0	0	0	0	0	0	0	0	0	0	0	0	0	0
246	0	0	0	0	0	0	0	0	0	0	0.00568537153903008	0	0	0	0.0113707430780602	0	0	0	0	0	0	0	0	0	0	0	0	0	0	0	0	0	0	0	0	0	0	0	0	0	0	0	0	0	0	0	0	0	0
247	0	0	0	0	0	0	0	0	0	0	0	0	0	0	0	0	0	0	0	0	0	0	0	0	0.0235682300259251	0	0.0117841150129625	0	0	0	-0.00814929508597506	0	0	0	0.0589205750648126	-0.00814929508597506	0	0	0	0	0	0	0.0272030499529125	0	0	0	0	0	0
248	-0.0195293428376135	0	0	0	0.40131461905074	0.0391389432485323	-0.00976467141880676	0	0	0	0	0	0	0	0	0	0	0	0	0	0	0	0	0	0	-0.00976467141880676	0	0	0	-0.00976467141880676	0	0	0	0	0	0	0	0	0	0	0	0	-0.0781173713504541	0	0	-0.0195293428376135	0	0	0
249	0	0	0	0	0	-0.0433463372345037	0	0	0	0	0	0	0	0	0	-0.0216731686172518	0	0	0	0	0	0	0	0	0	0	0	0	0	0	0	0	0	0	0	0	0	0	0	0	0	0	0	0	0	0	0	0	0
250	0	0	0	0	0	0	0	0	0	0	0	0	0	0	0	0	0	0	0	0	0	0	0	0	0	0	0	0	0	0	0	0	0	0	0	0	0	0	0	0	0	0	0	0	0	0	0	0	0
251	0	-0.0211685012701101	0	0	0	0	0	0	0	-0.0635055038103302	0.0435161009573542	0	0	0	0	0	-0.0211685012701101	0	0	0	0	0	0.0870322019147084	0	0	0	0	0	0	0	0	0	0	0.0435161009573542	0	0	0	0	0.0223475996872441	0	0	0	0	-0.0846740050804403	0.0223475996872441	0	0	0.0435161009573542	-0.0211685012701101
252	0	0	0	0	0	0	0	0	0	0	0	0	0	0	0	0	0	0	0	0	0	0	0	0	0	0	0	0	0	0	0	0	0	0	0	0	0	0	0	0	0	0	0	0	0	0	0	0	0
253	0	0	0	-0.0831946755407654	0	-0.0831946755407654	0	0	0	0	0	0	0	0	0	-0.0831946755407654	0	0	0	0	0	0	0	0	0	0	0	0	0	0	0	0	0	0	0	0	0	0	0	0	0	0	0	0	0	0	0	0	0
254	0	0	0	0	0	0	0.0131285282919785	0	0	0	-0.00800704620065658	0	0	0.0131285282919785	0	0	0	0	0	0	0.0131285282919785	0	0	0	0	0	0	0	0	0	0	0	0	0	0	0	0	0	0	0	0	0	-0.00800704620065658	0	0	0	0	0	0
255	0.116822429906542	-0.0408830744071954	0.116822429906542	0	0.029229487777107	0	0	-0.122649223221586	0.116822429906542	0	0	0.0350562810921512	0	0	0.116822429906542	-0.0817661488143908	0	0	0	0	0	0	-0.122649223221586	0	0	0	-0.0408830744071954	0	0	0	0	-0.0408830744071954	0.350467289719626	-0.163532297628782	0	0	0	0	0	-0.0817661488143908	-0.122649223221586	-0.0408830744071954	0.116822429906542	0	-0.0408830744071954	0	0	0	0
256	0	0	0	0	0	0	0	0.0520562207183758	0	0	0	0	0	0	0	0	0	0	0	0	0	-0.0493827160493827	0	0	0	0	0	0	0	0	0	0	0	0	0	0	0	0	0	0	0	0	0	-0.0493827160493827	0	0	0	0	0
257	-0.155038759689922	0.309187279151943	0.027049606924699	0.176678445229682	0.281247431999342	-0.0775193798449612	0.258717506231682	0.027049606924699	-0.00178048045580304	0.159558440846961	0.1649683622319	-0.022529925767661	-0.034240008765442	0.264127427616621	-0.022529925767661	-0.129769633221026	-0.372257375297888	0.027049606924699	0.314597200536883	-0.310967759607747	0.137028515079299	-0.034240008765442	0.148738598077081	-0.0387596899224806	0.198318130769442	-0.210918453995124	-0.232558139534884	-0.155038759689922	-0.0387596899224806	-0.027939847152601	0.132508833922261	-0.083819541457803	-0.0721094584600215	-0.00630016161284097	-0.172158764072644	0.109978908154601	0.020749445311858	0.12620867230942	0.247897663461802	-0.360547292300107	-0.078409620072863	-0.348837209302326	-0.045059851535322	0	-0.094639384227682	0.192908209384501	0.485865724381625	-0.100939545840524	0.529145095461144
258	0	0	0	0	0	0	0	0	0	0	0	0	0	0	0	0	0	0	0	0	0	0	0	0	0	0	0	0	0	0	0	0	0	0	0	0	0	0	0	0	0	0	0	0	0	0	0	0	0
259	0	0	0	0	0	0	0	0	0	0	0	0	0	0	0	0	0	0	0	0	0	0	0	0	0	0	0	0.0161524794055888	0	0	0	0	0	0	0	0	0	0	0	0	0	0	0	0	0	0	0	0	0
260	0	0	0	0	0	0	0	0	0	0	0	0	0	0	0	0	0	0	0	0	0	0	0	0	0	0	0	0	0	0	0	0	0	0	0	0	0	0	0	0	0	0	0	0	0	0	0	0	0
261	0	0	0	0	0	0	0	0	0	0	0	0	0	0	0	0	0	0	0	0	0	0	0	0	0	0	0	0	0	0	0	0	0	0	0	0	0	0	0	-0.119904076738609	0	0	0	0	0	0	0	0	0
262	0	0	0	0	0	0.0112599932440041	0	0	0	0	-0.014421690222094	0	0	0	0	0.0112599932440041	0	0	0	0	0	0	0	0	0	0	0	0	0	0	0	0	0	0	0	0	0	0	0	0	0	0	0	0	0	0	0	0	0
263	0	0	0	0	0	0	-0.0766990625590355	0	0.0371931564592115	0	0.0260560587868649	0	0	0	0	0	0	0	0	0	0	0	0	0	0	0	0	-0.0111370976723466	0	0	0	0	0	0	0	0	0	0	0	0.0123977188197372	0	0	0	0	-0.0111370976723466	0	0	0	0
264	0	0	0	0	0	0	0	0	0	0	0	0	0	0	0	0	0	0	0	0	0	0	0	0	0	0	0	0	0	0	0	0	0	-0.0749625187406297	0	0	0	0	0	0	-0.0749625187406297	0	0	0	0	0	0	0	0
265	-0.0831255195344971	-0.0415627597672485	0	-0.0415627597672485	0	-0.0831255195344971	0	0	0	0	-0.0415627597672485	0	0	0	0	0	0	0	0	0	0	-0.0831255195344971	0.0730994152046784	0	0	0	-0.0415627597672485	0	0	0	0.0315366554374299	0	0	0	0	0.0730994152046784	0	0	0	0	0	0	0	0	0	0	0	0.219298245614035	-0.0415627597672485
266	0	0	0	0	0	0	0	0	0	0	0	0	0	0.293255131964809	0	0	0	0	0	0	0	0.293255131964809	0	-0.169491525423729	0	0	0	0	0	0	0	0	0	0	0	0	0	0	0	0	0	0	0	0	0	0	0	0	0
267	0	-0.019359592392846	0	0	0	0	0	0	-0.0100538041925855	0	0	0	-0.0120062432464882	0	0	0	0	0	-0.0120062432464882	0.00465289410013028	0	0	0	0	-0.019359592392846	0	-0.0580787771785382	0	0	0	-0.0120062432464882	0	0	0	0	0	-0.00735334914635792	0	0	-0.0360187297394645	-0.0627316712786684	0	-0.0120062432464882	-0.0360187297394645	0	0	-0.0433720788858224	0	0
268	0	0	0	-0.00601684717208183	0	0	0	0	0	0	0	0	0	0	0	0	0	0	0	0	0	0	0	0	0	0	0	0	0	0	0	0	0	0	0	0	0	0	0	0	0	0	0	0	0	0	0	0	0
269	0	0	0	0	0	0	0	0	0	0	0	0	0	0	0	0	0	0	0	0	0	0	0	0	0	0	0	0	0	0	0	0	0	0	0	0	0	0	0	0	0	0	0	0	0	0	0	0	0
270	0	0	0	0	0	0	0	0	0	0	0	0	0	0	0	0	0	0	0	0	0	0	0	0	0	0	0	0	0	0	0	0	0	0	0	0	0	0	0	-0.0179694519317161	0	0	0	-0.0179694519317161	0	0	0	0	0
271	0	0.06960695488145	0	0	0	0	-0.226908982850203	0	0	0	0	0.06960695488145	0	0	0.941066649870553	0	0	0	0	0	0	0	0	0	0	-0.0741289844329133	0	0	0	0	0	0	0	0	0	0	-0.0741289844329133	0	0.871459694989107	-0.148257968865827	0	-0.0741289844329133	0	0.435729847494553	-0.148257968865827	-0.370644922164566	0	0.217864923747277	-0.22238695329874
272	0	0	0	0	0	0	0	0	0	0	0	0	0	0	0	0	0	0	0	0	0	0	0	0	0	0	0	0	0	0	0	0	0	0	0	0	0	0	0	0	0	0	0	0	-0.0564971751412429	0	0	0	0
273	0	0	0	0	0	0	0	0	0	0	0	0	0	0	0	0	0	0	0	0	0	0	0	0	0	0	0	0	0	0	0	0	0	0	0	0	0	0	0	0	0	0	0	0	0	0	0	0	0
274	0	0	0	0	0	0.211792465690612	0	0	0	0	-0.0726216412490922	-0.39954295458544	-0.062955279444606	0.0568828213879408	0	0	0	0.0494471584614202	0.113765642775882	-0.145243282498184	0	0.24773150316883	-0.176720922220487	0	0	-0.104099280971395	0	-0.508351488743646	-0.145243282498184	4.25109242281158	0.0980268229147308	0.0568828213879408	-0.0726216412490922	0	-0.0726216412490922	0	0	0	0	0.0568828213879408	-0.141649378750362	0.025405181665639	0.0568828213879408	0	2.54981274522197	0.113765642775882	0.0568828213879408	-0.01214491611333	0
275	0	0	0	-0.0421762969211303	0	0	0	0	0	0	0	0	-0.126528890763391	0	0	0	0	0	0	0	0	0	0	0	0	0	0	0	0	0	0	0	0	0	0	0	0	0	0	0	0	0	0	0	0	0	0	0	0
276	0	0	0	0	0	0	0	0	0	0	0	0	0	0	0	0	0	0	0	0	0	0	0	0	0	0	0	0	0	0	0	0	0	0	0	0	0	0	0	0	0	0	0	0	0	0	0	0	0
277	0	0	0	0	0	0	0	0	0	0	0	0	0	0	0	0	0	0	0	0	0	0	0	0	0	0	0	0	0	0	0	0	0	0	0	0	0	0	0	0	0	0	0	0	0	0	0	0	0
278	0	0	0	0	0	0	0	0	0	0	0.0279798545047566	0	0	0	0	0	0	0	0	0	0	0	0	0	0	0	0	0	0	0	0	0	0	0	0	0	0	0	0	0	0	0	0	0	0	0	0	0	0
279	0.0048296387822446	0	0.018754688672168	-0.0163398692810458	0	0.018754688672168	0	-0.0326797385620915	0	-0.0163398692810458	0	0	0	0	0	0	0	0	0	0.0750187546886722	0	0	0	0	0	-0.0163398692810458	0	0	-0.0326797385620915	-0.0163398692810458	0	0	0.018754688672168	-0.0163398692810458	0	0.018754688672168	-0.0816993464052288	-0.0163398692810458	0	0	0	0	0	0	0	0	0	0	-0.0163398692810458
280	0	0	0	0	0	0	0	0	0	0	0	0	0	0	0	0	0.0685871056241427	0	0.0685871056241427	0	0	0	0	0	0	0	0	0	0	0.137174211248285	0	0	0	0	0	0	0	0	0	0	0	0	0	0.0685871056241427	0	0	0	0	0
281	0	0	0	0	0	0	0	0	0	0.00746352203604881	0	0	0	0	0	-0.00271983028259037	0	0	0	0	0.00373176101802441	0	0	0	0	0	-0.00271983028259037	0.00746352203604881	-0.00271983028259037	0	0	0	0	0	0	0	0	0	0	0	0	0	0	0	0	0	0	0.0111952830540732	-0.00271983028259037
282	0	0	0	0	0	0	0	0	0	0	0	0	-0.00700133025274802	0	0	0	0.00291242011901762	0	0	0	0	0	-0.014002660505496	-0.0210039907582441	-0.00700133025274802	0	0	0	0	0.00991375037176564	0	-0.00700133025274802	0	0	0	0	-0.00700133025274802	0.00991375037176564	0	0.0128261704907833	0	-0.00408891013373036	0	0.0087372603570528	-0.014002660505496	0	0	0	0
283	0	0	0	0	0	0	0	0	0	0	0	0	0	0	0	0	0	0	0	0	0	0	0	0	0	0	0	0	0	0	0	0	0	0	0	0	0	0	0	0	0	0	0	0	0	0	0	0	0
284	0	0	0	0	0	0	0	0	0	0	0	0	0	0	0	0	0	0	0	0	0	0	0	0	0	0	-0.0243546030199708	-0.0069903908542928	-0.198443784556967	-0.0243546030199708	-0.0069903908542928	0	0	-0.0243546030199708	0	-0.146127618119825	-0.0556995968942344	0	0.0417188151856487	-0.0730638090599123	-0.0243546030199708	0	-0.0243546030199708	0	0	0	0	-0.177472611994088	0
285	0	0	0	0	0	0	0	0	0	0	0	0	0	0	0	0	0	0	0	0	0	0	0	0	0	0	0	0	0	0	0	0	0	0	0	0	0	0	0	0	0	0	0	0	0	0	0	0	0
286	0	0	0	0	0	0	0	0	0	0	0	0	0	0	0	0	0	0	0	0	0	0	0	0	0	0	0	0	0	0	-0.0148588410104012	0	0	0	0	0	0	0	0	0	0	0	0	0	0	0	0	0	0
287	0	0	0	0	0	0	0	0	0	0	0	0	0	0	0	0	0	0	0	0	0	0	0	0	0	0	0	0	0	0	0	-0.0785237534354142	0	-0.235571260306243	0	0	0	0	0	0	0	0	0	-0.0196309383588536	0	0	0	0	0
288	0	0	0	0	0	0	0	0	0	0	0	0	0	0	0	0	0	0	0	0	0	0	0	0	0	0	0	0	0	0	0	0	0	0	0	0.0817661488143908	0.195497649630424	0.2415929088226	0	0	0	0	0	0	0	0	0	0	0
289	0	0	0	0	0	0	0	0	0	0	0	0	0	0	0	0	0	0	0	0	0	0	0	0	0	0	0	0	0	0	0	0	0	0	0	0	0	0	0	0	0	0	0	0	0	0	0	0	0
290	0	0	0	0	0	0	0	-0.185528756957328	0	0	0	0	0	0	0	0	-0.0927643784786642	0	0	0	0	0	0	0	0	0	0	0	0	0	0	0	0	0	0	0	0	0	0	0	0	0	0	0	0	0	0	0	0
291	0	0	0	0	0	0	0	0	0	0	0	0	0	0	0	0	0	0	0	0	0	0	0	0	0	0	0	0	0	-0.010120433154539	-0.030361299463617	0	0	0	0	0	0	0	0	0	0	0	0	0	0	0	0	0	0
292	0	0	-0.0106236056517582	0	0.0180635838150289	-0.0106236056517582	0	-0.0106236056517582	0.0180635838150289	0	0	0	0	0	0	0	0.0361271676300578	0	0	-0.0106236056517582	0	0	0	0.0180635838150289	0	0	0.0541907514450867	0	0	0.0074399781632707	0	0	0	0	0	0	0	0	0.0074399781632707	0	0	0	0	0	0	0	0	0	0
293	0	0.274847525063476	0	0	0	0	0	0	0	0	0	0	0	0	0	1.18577075098814	0	0	0	0	0	0	0	0	0	0	0	0	0	0	0	0	0	0	0	0	0	0	0	0	0	0	0	0	0	-0.120409391932571	0	0	0
294	0	0	0	0	0	0	0	0	-0.0306184935701164	0	0	0	0	0	0	0	0	0	0	0	0	0	0	0	0.51370381322486	0	0	0	0	0	-0.0612369871402327	0	0	0	0	0.00320155351018329	0	0	0	-0.214329454990814	0	0	0	0	0	0	0	0	0
295	0	0	0	0	0	0	0	0	0	0	0	0	0	0	0	0	0	0	0	0	0	0	0	-0.101936799184506	0.216684723726977	0	0	0	0	0	0	0	0	0	0	0	0	0	0	0	0	0	0	0	0	0	0	0	0
296	0	0	0	0	0	0	0	0	0	0	0	0	0	0	0	0	0	0	0	0	0	0.114155251141553	0	0	-0.0819672131147541	0.114155251141553	0	0	0	0	0.064376076053597	0.342465753424658	0	0.228310502283105	0.59697582154353	-0.049779175087955	0	0	0	0	0	0	0	0	0	0	0	0	0
297	0	0	0	0.136054421768707	0	0	0	0	0	0	0	0	0	0	-0.0881057268722467	0	0	0.0479486948964603	0	0	0	0	0	0	0	0	0	0	0	0	0	0	0	0	0	0	0	0	-0.0881057268722467	0	0	0	-0.0881057268722467	0	-0.26431718061674	0	0	0	0
298	0	0	0	0	0	0	0	0	0	0	0	0	0	0	0	0	0	0	0	0	0	0	0	0	0	0.108695652173913	0	0	0	0	0	0	0	0	0	0	0	0	0	0	0	0	0	0	0	0	0	0	0
299	0	-0.00872752661895619	0	0	0	0	0	0	0	0	0	0	0	0	0	0	0.0134156157767642	0	0	0	0	0	0	0	0	0.0268312315535283	0	0	0	0.0134156157767642	0	0	0	0	0	0	0	0	0	0	0	0	0	0	0	0	0	0	0
300	0	0	0	0	0	-0.0300661455201443	0	0	0	0	0	0	0	0	0	0	0	0	0	0	0	0	0	0	0	0	0	0	0	0	0	0	0	0	0	0	0	0	0	0	0	0	0	0	0	0	-0.0300661455201443	0	0
301	0	0	0	0	0	0	0	0	0	0	0	0	0	0	0	0	0	0	0	0	0	0	0	0	0	0	0	0.000806805445520798	0	0	0	0	0	0	-0.00425860193924423	0	0	0	0	0	0	0	0	0	0	0	0	0	-0.00892060660124889
302	0	0	0	0	0	0	0	0	0	0	0	0	0	0	0	0	0	0	0	0	0	0	0	0	0	0	0	0	0	0.0867678958785249	0	0	0	0	0	0	0	0	0	0	0	0	0	0	0	0	0	0	0
303	0	0	0	0	0	0	-0.023964086518841	0	0	0	0	0	0	0	0	0.00518253871653695	0	0	0	0	0	0	0	0	-0.00842105263157895	0	0	0	-0.00842105263157895	0	0	0	-0.0336842105263158	0	-0.0168421052631579	0	0	0	0	0	0.0136035913481159	0	0	0	0	0.0544143653924636	0	0	0
304	0	0	0	0	0	0	0	0	0	0	0	0	0	0	0	0	0	0	0	0	0	0	0	0	0	0	0	0	0	0	0	0	0	0	0	0	0	0	0	0	0	0	0	0	0	0	0	0	0
305	0	0	0	0	0	0	-0.0335795836131632	0	0	-0.0335795836131632	0	0	0	0	0	0	0	0	0	0	0.0539519827353655	0	0	0	0	0	0	0	0	0	0	0	0	0.0269759913676828	0	0	0	0	0.0269759913676828	0	0	0.250510759326148	0	0	0	0	0	0	0
306	0	0	0	0	0	0	0	0	0	0	0	0	0	0	0	0	-0.0450653447498873	0	-0.0450653447498873	0	0	0	0	0.136986301369863	0	0	0	0	0	0	0	0	0	0	0	0	0	-0.0450653447498873	0	0.045662100456621	0	0	0	0	-0.315457413249211	0	0	0	0
307	0	0	0	0	0	0	0	0	0	0	0	0	0	0	0	0	0	0	0	0	0	0	0	0	0	0	0	0	0	0	0	0	0	0	0	0	0	0	0	0	0	0	0	0	0	0	0	0	0
308	0	0.143425293136157	0.0621890547263682	-0.114854517611026	0.186567164179104	0	0	0	0.0621890547263682	0	0	0	-0.0382848392036753	0	0	0	0.186567164179104	0.0621890547263682	0	0.00952359184171001	0	0	0.0621890547263682	0.258279810747183	-0.0382848392036753	0	0.0621890547263682	0	0	0	0	0	0	0	0.124378109452736	0.0621890547263682	0	0	0	-0.0382848392036753	0	0	0.124378109452736	0	0	0	0	-0.0765696784073507	-0.0382848392036753
309	0	0	0	0	0	0	0	0	0	0	0	0	0	-0.0069886085680341	0	0	0	0	0	0	0	0	0	0	0	0	0	0	0	0	0	0	0.0238549618320611	0	0	0	0	0	0	0	0	0	0	-0.0069886085680341	0	0	0	0	0
310	0	0	-0.129609991752091	0	0.0344055614469188	0	0	0	0	0	0	0	0	0	-0.0353481795687522	0	0	0.0193236714975845	0	0	0	0	0	0	0	0.0193236714975845	0.0579710144927536	0	0.0579710144927536	0	0	-0.0235654530458348	0.107458465889006	0.0966183574879227	0	0	0	0	0	0	0	0	0	0	0	0	0	0	0
311	0	0	0	0	0	0	0	0	0	0	0	0	0	0	0	0	0	0	0	0	0	0	0	0	0	0	0	0	0	0	0	0	0	0	0	0	0	0	0	0	0	0	0	0	0	0	-0.0626959247648903	0	0
312	0	0	0	0	0	0	0	0	0	0	0	0	0	0	0	0	0.0121521448535667	0	0	0	0	0	0	0.0121521448535667	0	0	0	0	0	0	0	0	0	0	0	0	0	0	0	0	0	0	0	0	-0.0062293652276833	0	0	0	0
313	0	0	0	-0.0059343659130022	0	0	0	0	0	0	-0.0118687318260044	0	0	0	0	-0.0059343659130022	0	0	0	0	0	0	-0.0059343659130022	0	0	0	0	0.00915080527086384	0	0	0	0	0	0	0	0	0	0	-0.0059343659130022	-0.0118687318260044	0	0	0	0	0	0	-0.0059343659130022	0	0
314	0	0	0	0	0	0	0	0	0	0	0	0	0	0	0	0	0.0674763832658569	0	0	0	-0.0246913580246914	0	0.0337381916329285	0	0	0	0	0	0	0	0	0	0	0	0	0	0	0	0	0	0	0	0	0	0	0	0	0	0
315	0	0	0	0	0	0	0	0	0	0	0	0	0	0	0	0	0	0	0	0	0	0	0	0	0	0	0	0	0	0	0	0	0	-0.0270562770562771	0	0	0	0	0	0	0	0	0	0	0	0	0	0	0
316	0	0.140845070422535	0	0	0	0	0	0	0	0	-0.0713775874375446	0	0	0	0	0	0	0	0	0	-0.16758653275829	0.140845070422535	0	0	0	0	-0.501553216515366	0	0	-1.500839440641	0	0	-0.214132762312634	0	-0.0713775874375446	0	0	0	0	0	0	0	0	0	0	0	0	0	0
317	0	0.0737463126843658	0	0	0	0	0	0	-0.0522739153162572	0	0	0	0	0	0.0368731563421829	-0.135349348580663	0.0368731563421829	0	-0.0522739153162572	0	-0.104547830632514	0	0	0	0	-0.104547830632514	-0.0522739153162572	0	0	0	-0.0522739153162572	0	0	0	-0.0154007589740743	0	0	0	0	0	0	0	0	0	0	0	0	0	0.0368731563421829
318	0	0	0	0	0	0	0	0	0	0	0	0	0	0	0	0	0	0	0	0	0	0	0	0	0	0	0	0	0	0	0	0	0	0	0	0	0	0	0	0	0	0	0	0	0	0	0	0	0
319	0	0	0	0	0	0	0	0	0	0	0	0	0	0	0	0	0	0	0	0	0	0	0	0	0	0	0	0	0	0	0	0	0	0	0	0	0	0	0	0	0	0	0	0	0	0	0	0	0
320	0	0	0	0	0	0	0	0	0	0	0	0	0	0	0	0	0	0	0	0	0	0	0	0	0	0	0	0	0	0	0	0	0	0	0	0	0	0	0	0	0	0	0	0	0.0217817333791722	0	0	0	0
321	0	0	0	0	0	0	0	0	0	0	0	0	0	0	0	0	0	0	0	0	0	0	0	0	0	0	0	0	0	0	0	0	0	0	0	0	0	0	0	0	0	0	0	0	0	0	0	0	0
322	0	0	0	0	0	0	0	0	0	0	0	0	0	0	0	0	0	0	0	0	0	0	0	0	0	0	0	0	0	0	0	0	0	0	0	0	0	0	0	0	0	0	0	0	0	0	0	0	0
323	0	0	0	0	0	0	0	0	0	0	0	0	-0.00385884350460167	0	0	0	0	0	-0.00771768700920334	0	0	0	0	0	0	0	0	0	0	0	0	-0.00192942175230084	0	0	0	0	0	0	0	0	0	0	-0.00578826525690251	0	0	0	0	0	0
324	0	0.112782368107831	0	0	0.193492618309607	0	0	0	0	-0.0972762645914397	0	0	0	0	0	0	0	0	0.0807102502017756	0	0	0	0	0	0	0	-0.0972762645914397	0	0	0	0	0	0	0	0	0	0	0	0	0	0	0	0	0	0	0	0	0	0
325	0	0	0.0149700598802395	0	0	0	0	0	0	0	0	0	0	0	0	0	0	0	0	0	0	0.029940119760479	0	0	0	0	0	0	0	0	0	0	0	0	0	0	0	0	0	-0.0240847784200385	0	0	0	0	0	0	0	0	0
326	0	0.352941176470588	-0.06210365186967	-0.0743494423791822	0	0.117647058823529	0	0.086595232888695	0.117647058823529	0	-0.0743494423791822	-0.148698884758364	0	0	-0.0743494423791822	0	0	0	0	-0.0743494423791822	0	0.117647058823529	0	0.117647058823529	0	-0.0743494423791822	0.730373933960197	0	0	0.235294117647059	0	0	0	0	-0.0743494423791822	0	0	0	0	-0.148698884758364	0	0.117647058823529	-0.0743494423791822	0	0	0.235294117647059	-0.0743494423791822	0	0
327	0	0	0	0	0.143129770992366	0	0	0	0	0	0	0	0	0	0	0	0.0477099236641221	0	0	0	0	0	0	0	0	0	0	0	0	0	0	0	0	0	0	0	0	0	0	0	0	0	0	0	0	0	0	-0.0304599451720987	0
328	0	0	0	0	0	0	0	0	0	0	0	0	0	0	0	0	0	0	0	0	0	0	0	0	-0.103896103896104	0	0	0	0	0	0	0	0	0	0	0	0	0	0	0	0	0	0	0	0	0	0	0	0
329	-0.0453309156844968	0.207060426188362	-0.220511967206232	-0.417775317277533	-0.019594152234123	0.20340596128755	-0.064925067918619	0.0576161381170002	-0.145789823170552	0	-0.0453309156844968	0	0.171526586620926	0	-0.0453309156844968	0	0	0	0	0	0	0	0	0	-0.0906618313689937	0.242594265755798	-0.317316409791478	-0.100458907486055	-0.00365446490080901	0.0612706030178111	-0.064925067918619	-0.453309156844968	-0.00979707611706099	0	0	0.343053173241852	0.126195670936429	0	0	-0.181323662737987	-0.0453309156844968	0	0	0	-0.0906618313689937	0	0.459451768061221	0.0710676791348711	-0.327113485908539
330	0	0.0184740439682246	0	0	0.0378102967514509	0.0184740439682246	0.0369480879364493	-0.0343614614914443	0	-0.0352236703064459	0	-0.017611835153223	0	0.0184740439682246	0	0	0	0	0	0	-0.017611835153223	0	0	0	0	0	0	-0.017611835153223	0	0	0	0	0.0184740439682246	-0.123282846072561	0	-0.0528355054596689	0	-0.017611835153223	0.0184740439682246	-0.017611835153223	0.0369480879364493	0	0.0184740439682246	0	0	0	0	0	0
331	0	-0.0761962816214569	0	0.0992802184164805	0	0	0	0.0248200546041201	0	-0.020897714368754	0	0	0.0191615965596576	0.0248200546041201	-0.0152392563242914	0	-0.0152392563242914	0.0496401092082403	0	0	0	0.0248200546041201	0	-0.0152392563242914	0	0.0248200546041201	0	0	0	0	0.0248200546041201	0	0	0	0	0	-0.0152392563242914	0	0	0	0.0496401092082403	0	0	0	0	0	0	0	0
332	0	0	0	0	0	0	0	0	0	0	0	0	0	0	-0.0311915159076731	0	0	0	-0.0311915159076731	0	0	0	0	0	0	0	0	0	0	0	0	0	0	0	0	0	0	0	0	0	0	0	0	0	0	0	0	0	0
333	0	0	0	-0.058173356602676	0	0.086244070720138	-0.29086678301338	-0.174520069808028	-0.073224677845283	0.086244070720138	-0.073224677845283	0.129366106080207	0.043122035360069	-0.320969425498594	-0.116346713205352	0	-0.073224677845283	0	0.086244070720138	0.071192749477531	0.086244070720138	-0.015051321242607	0	0.013019392874855	-0.232693426410704	0	-0.118378641573104	0	-0.131398034447959	-0.058173356602676	-0.161500676933173	-0.349040139616056	-0.015051321242607	-0.349040139616056	0.1143147848376	-0.232693426410704	-0.116346713205352	-0.058173356602676	-0.073224677845283	-0.465386852821408	-0.08827599908789	-0.219674033535849	-0.437316138703946	-0.103327320330497	-0.296962568116636	-0.060205284970428	0.127334177712455	0.129366106080207	0.056141428234924
334	-0.28957528957529	-0.0965250965250965	-0.182737682737683	0	0.117150117150117	0	-0.28957528957529	0.213675213675214	-0.182737682737683	0	0.544500544500544	0.106837606837607	0.534188034188034	0.0103125103125105	-0.28957528957529	-0.193050193050193	-0.482625482625483	-0.675675675675676	0.213675213675214	-0.086212586212586	0.265237765237765	0.351450351450351	-0.568838068838069	-0.386100386100386	0.020625020625021	-0.162112662112662	0.137775137775137	-0.386100386100386	0.244612744612744	0	0.489225489225491	0.33082533082533	0.15468765468765	0.254925254925255	-0.268950268950269	0.320512820512821	-0.182737682737683	-0.162112662112662	-0.193050193050193	0.0103125103125105	0.213675213675214	0.127462627462628	0.106837606837607	0.671963171963172	0	-0.675675675675676	-0.172425172425172	-0.0965250965250965	0.127462627462628
335	0.232367634879807	0.00964103223318443	0	0	0	0	0	0	0	0	0	0	0	0	0	0	0	0	0	0	0	0	0	0	0	0	0	0	0	0.00321367741106148	0	0	0	0	0	0	0	0	0	0	0	0	0	0	-0.00237515586960394	0	0	0	0
336	0	0	0	0	0	0	0	0	0	0	0	0	0	0	0	0	0	0	0	0	0	0	0	0	0	0	0	0	0	0	0	0	0	0	0	0	0	0	0	0	0	0	0	0	0	0	0	0	0
337	0	0	0	0	0	0	0	0	0	0	0	0	0	0	0	0	0	0	0	0	0	0	0	0	0	0	0	0	0	0	0	0	0	0	0	0	0	0	0	0	0	0	0	0	0	0	0	0	0
338	0	0	0	0	0	0	0	0	0	0	0	0	0	0	0	0	0	0	0	0	0	0	-0.0157405949944908	0	0	0	0	0	0	0	0	0	0	0	0	0	0	0	0	0	0	0	0	0	0	0	0	0	0
339	-0.033311125916056	0	0	0	0	0	0	0	0	0	0	0	0	0	-0.0666222518321119	0	0	0	0	0.915506878198419	0	0	-0.0999333777481679	0	0	0	0	0	0	0	-0.0999333777481679	0	0	0	0	0	0	0	0	0	0	2.68886676281746	0	0	0	0	0	0	0
340	0	0	0	-0.0364830353885443	0	0	0	0	0	-0.060168053601107	0.0793650793650794	0	0.0793650793650794	1.77096182021392	0.022826026109499	0.0264550264550265	0	0	0.075736079019552	0	0	0	0.156153182420966	0.0693370704315617	0	0.175157176251668	0	0	0.0529100529100529	0	0.0164270175215086	0.012798017175982	-0.0364830353885443	0	0	0	0.0164270175215086	0	0.02922503469749	0	0.405994413655851	-0.0100280089335178	0.218039220228202	0	0	0.0264550264550265	-0.060168053601107	0.138674140863123	0
341	0	0	0	0	0.13531799729364	0	0	0	0	0	0	0	0	0	0	0	0	0	0	0	0	0	0	0	0	0	0	0	0	0	0	0	0	0	0	0	0	0	0	0	0	0	0	0	0	0	0	0	0
342	0	0	0	0	0	0	0	0	0	0	0	0	0	0	0	0	0	0	0	0	0	0	0	0	0	0	0	0	0	0	0	0	0	0	0	0	0	0	0	0	0	0	0	0	0	0	0	0	0
343	0.0440722785368004	-0.143129770992366	0.0440722785368004	0	-0.143129770992366	0.0440722785368004	0	0	-0.146767416119689	-0.238549618320611	-0.143129770992366	0.0440722785368004	0	-0.0477099236641221	-0.0954198473282443	-0.06226050417341	0.0881445570736007	0	-0.0036376451273217	0	0	0.169013823892558	0	-0.0954198473282443	-0.0477099236641221	0	-0.0954198473282443	0.0440722785368004	-0.154042706374332	-0.572519083969466	0.0881445570736007	-0.143129770992366	-0.190839694656489	0.220361392684002	0	0	-0.0477099236641221	-0.0954198473282443	-0.0477099236641221	0	0	0	0	-0.0477099236641221	0	0.0440722785368004	0	-0.143129770992366	-0.102695137582888
344	0	0	0.0679040289723857	0	0	-0.0157383090941369	0	0	0	0	0	0	0	0	0	0	0	0	0	0	0	0	0	0	0	0	0	0	0	0	0	0	0	0	0	0	0	0	0	0	0	0	0	0	0	0	0	0	0
345	0	0	0	0	0	0	0	0	0	0	0	0	0	0	0	0	0	0	0	0	0	0	0	0	0	0	0	0	0	0	0	0	0	0	0	0	0	0	0	0	0	0	0	0	0	0	0	0	0
346	0.0685871056241427	0	0	0	0	0	0	0	0	0	0	0	0	0	0	0	0	0	0	0	0	0	0	0	0	0	0	0	0.0342935528120713	0	0	0	0	0	0	0	0.0342935528120713	0	0	0	0	0	0	0	0	0	0	0	0
347	0	0	0	0	0	0	0	0	0	0	0	0	0	0	0	0	0	0	0	0	0	0	0	0	0	0	0	0	0	0	0	0	0	0	0	0	0	0	0	0	0	0	0	0	0	0	0	0	0
348	0	0	0	0	-0.0248323814253787	0	0	0	0	0	0	0	0	0	0	0	0	0	0	0	0	0	0	0	0	0	0	0	0	0	0	0	0	0	0	0	0	0	0	0	0	0	0	0	0	0	0	0	0
349	0	0	0	0	0	0	0	0	0	0	0	0	0	0	0	0	0	0	0	0	0	0	0	0	0	0	0	0	0	0	0	0	0	0	0	0	0	0	0	0	0	0	0	0	0	0	0	0	0
350	0	0	0	0	0	0	0	0	0	0	0.028312570781427	0	0	0	-0.0251193167545843	0	0	-0.0187328087008989	0	0	0.0315058248082696	0	0	0	0	0	-0.0251193167545843	0.028312570781427	0	0	0	0	0	0	-0.0502386335091686	0	0	0	0	0	0	0	0	0.0849377123442809	0.028312570781427	0	0	0	0
351	0	0	0	0	0	0	0	-0.102599584857171	0	0	0	0	0	0	0	0	0	0	0	0	0	0	0.0298507462686567	0	0	0	0	0	0	0	0	0	0	0	0	0	0	0	0	0	0	0	0	0	0	0	0	0	-0.0883002207505519
352	0	0	0	0	0	0	0	0	0	0	-0.0290107339715695	0	0	0	0	0	0	0	0.208990059364409	0	0	0	0	0	0.0396667988893296	0	0	0	0	0	0	0	0	0.0213121298355203	0	0	0	0	0	0	0	0	0	0	0	0	0	-0.0290107339715695	0
353	-0.076103500761035	0	0	0	0	0	0	0	0	0	0	0	-0.076103500761035	0	0	0	0.107181136120043	0	0	0	0	0	0	0	0	0	0	0	0	0	0	0	0	0	0	0	0	0	0	0	0	0	0	0	0	-0.684931506849315	0	0	0
354	0.0147597411767432	-0.00599268891951819	0	0	0	0	0	0	0	0	0	0	0	0	0	0	0	-0.00599268891951819	0	0	0	0	0.0133725595078898	-0.00599268891951819	0	0	0	0	0	0	0	0	0.0133725595078898	0	0	0	0	0	0	0	0	0	0	0	0	0	0	0	0
355	0	0	0	0	0	0	0	0	0	0	0	0	0	-0.0488997555012225	0	0	0	0	0	0	0	0	0	0	2	0	0	0	0	0	0	0	0	0	0	0	0	0	0	0	0	0	0	0	0	0	0	0	0
356	0	0	0	0	0	0	0	0	0	0	0	0	0	0	0	0	0	0	0	0	0	0	0	0	0	0	0	0	0	0	0	0	0	0	0	0	0	0	0	0	0	0	0	0	0	0	0	0	0
357	0	0	0	0	0	0	0	0	0	0	0	0	0.142247510668563	0	0	0	-0.0146284376828555	0	0	0	0	0	0	0	0	0	0	0	0	0	0	0	0	0	0	0	0	0	0	0	0	0	0	0	0	0	0	0	0
358	0	0	0	0	0	0	0	0	0	0	0	0	-0.0554938956714761	0	0	0	0	0	0	0	0	0	0	-0.0554938956714761	0	-0.0554938956714761	0	0	0	0	0	0	0	0	-0.0913876345416976	0	0	0	0	0	0	0	0	0	0	0	0	0	0
359	0.0365497076023392	0	0	0	0	0	0	0	0.0730994152046784	0	0	0	0	0	0	0	0	0	0	0	0	0	0	0	0.0365497076023392	0	0	0	0	0	0	0	0	0	0	0	0	0	0	0	0.0365497076023392	0	0	0	0	0	0	0	0
360	0	-0.0246426811237063	0	0	0.0237079184447605	0	0	0	-0.0246426811237063	0	0	0	0	0	0	0	0	0	0	-0.0492853622474125	0	0	0	0.0237079184447605	-0.0739280433711188	0.0237079184447605	0	0	0	0	0	0	0	0	0.0237079184447605	0	0	0	0	0	0	0	0	0	0	0	0	0	0
361	0	0	0	0	0	0	0	0	0	0	0	0	0	0	0	0	0	0	0	0	0	0	0	0	0	0	0	0	0	0	0	0	0	0	0	0	0	0	0	0	0	0	0	0	0	0	0	0	0
362	0	0	0	0	0	0	0	0	0	-0.0816993464052288	0	0	0	0	0	-0.163398692810458	0	0	0	0	0	0	0	0	0	0	0	0	-0.0816993464052288	-0.163398692810458	0	0	-0.0816993464052288	0	-0.163398692810458	0	0	0	0	0	0	0	0.077651552700622	0	0	0	0	0	0
363	0	0	0	0	0	0	0	0	0	0	0	0	0	0	0	0	0	0	0	0.0706464146944543	0	0	0	0	0	0	0	0	0	0	0	0	0	0	0	0	0	0	0	0.0353232073472271	0	0	0	0	0	0	0	0	0
364	0	0	0	0	0	0	0	0	0	0	0	0	0	0	0	0	0	0	0	0	0	0	0	0	0	0	0	0	0	0	0	0	0	0	0	0	0	0	0	0	0	0	0	0	0	0	0	0	0
365	0	0	0	0	0.0438404208680403	0	0	0	0	0	0	0	0	0	0	0	0	0	0	0	0	0	0	0	0	0	0	0	0	0	0	0	0	0	0	0	0	0	0	0	0	0	0	0	0	0	0	0	0
366	0	0	0	-0.0886524822695035	0	0	0	0	0	0	0	0	0	0	0	0	0	0	0	0	0	0	0	0	0	0	0	0	0	0	0	0	0	0	0	0	0	0	0	0	0	0	0	0	0	0	0	0	0
367	0	0	0	0	0	0	0	0	0	0.00049731944817434	0	0	0	0	0	0	0	0	0	0	0	0	0	0	0	0	0	0	0	0	0	0	0	0	0	0	0	0	0	0	0	0	0	0	0	0	0.00049731944817434	0	0
368	0	0	0	0	0	0	0	0	0	-0.000133472500660689	0	0	0	0	0	-0.000800835003964133	0	0	0	0	0	0	0	0	0	0	0	0	0	0	0	0	0	0	-0.000266945001321378	0	0	0	0	0	0	0	0	0	-0.000266945001321378	-0.000133472500660689	0	0	0
369	0	0	0	0	0	0	0	0	0	0	0	0	0	0	0	0	0	0	0	0	0	0	0	0	0	0	0	0	0	0	0	0	0	0	0	0	0	0	0	0	0	0	0	0	0	0	0	0	0
370	0	-0.00618142481842065	-0.0123628496368413	-0.00618142481842065	-0.0216349868644723	0	0	0	0	0	0	0	0	0	0	0	0	0	0	0	0	0	0	-0.00309071240921032	0	0	0	-0.00309071240921032	0	0	0	0	0	0	0	0	0	0	0	0	0	0	0	-0.00309071240921032	0	0	0	0	0
371	0	0	0	0	0	0	0	0	0	0	0	0	0	0	0	0	0	0	0	0	0	0	0	0	0	0	0	0	0	0	0	0	0	0	0	0	0	0	0	0	0	0	0	0	0	0	0	0	0
372	0	0	0	0	0	0	0	0	-0.000708978503771766	0	0	0	0	0	0	0	0	0	0	0	0	0	0	0	0	0	0	0	0	0	0	0	0	0	0	0	0	0	0	0	0	0	0	0	0	0	0	0	0
373	0	0	0	0.000907587202802255	0	0	-0.00032685186093107	0	0	0	0	0	0	0	0	-0.000163425930465535	0	0	0	0	0	0	0	0	0	0	0	0	0	0	0	0	-0.00032685186093107	0	0	-0.000490277791396605	0	0	0	-0.000163425930465535	0	0	0	0	-0.00032685186093107	0	0	0	-0.000163425930465535
374	0	0	0	0	0	0	0	0	0	0	0	0	0	0	0	0	0	0	0	0	0	0	0	0	0	0	0	0	0	0	0	0	0	0	0	0	0	0	0	0	0	-8.50152177239726e-05	0	0	0	0	-0.000170030435447945	0	0
375	0	0	0	0	-0.000358437070995631	0	0	0	0	0	0	0	0	0	0	0	0	0	0	0	0	-0.000358437070995631	0	0	0	0	0	0	0	0	0	0	0	0	0	0	0	0	0	0	0	0	0	0	0	0	0	0	0
376	0	0	0	0	0	0	0	0	0	0	0	0	0	0	0	0	0	0	0	0	0	0	0	0	0	0	0	0	0	0	0	0	0	0	0	0	0	0	0	0	0	0	0	0	0	0	0	0	0
377	0	0	0	-0.000251769942697161	0	0	-0.000251769942697161	0	0	0	0	0	0	0	0	0	0	0	0	0	0	0	0	0	0	0	0	0	0	0	0	0	0	0	0	0	0	0	0	0	0	0	0	0	0	-0.000503539885394322	-0.012357236316211	0	0
378	0	0	0	0	0	0	0	0	0	0	0	0	0	0	0	0	0	0	0	0	-0.000282955069564504	0	0	0	0	0	0	0	0	0	0	-0.000141477534782252	0	0	0	0	0	0	0	0	0	0	0	0	-0.000141477534782252	0	0	0	0
379	0	0	0	0	0	0	0	0	0	0	0	0	0	0	0	0	0	0	0	0	0	0	0	0	0	0	0	0	0	0	0	0	0	0	0	0	0	0.00878271561566837	0	0	0	0	0.0263481468470051	0	0	0.0175654312313367	0	0	0
380	0	0	0	0	0	0	0	0	0	0	0	0	0	0	0	0	0	0	0	0	0	0	0	0	0	0	0	-0.000582367089271051	0	0	0	0	0	0	0	0	0	-0.000582367089271051	0	0	0	0	0	0	-0.000582367089271051	0	0	0	0
381	0	0	0	0	0	0.00423495532122136	0	0	0	0.00846991064244272	0	0.00423495532122136	0	0	0	0	0	0.00745179948610783	0	0	0	0	0	0	0	0	0	0	0	0	0	0	0	0	0	0	0	0	0	0	0	0	-0.00262653323877814	0.00423495532122136	0	0	0	0	0
382	0	0	0	0	0	0	0	0	0	0	0	0	0	0	0	0	0	0	0	0	0.0022584069197588	0	0	0	0	0	0	0	0	0	0	0	0	0	0	0	0	0	0	0	0	0	0	0	0	0	0	0	0
383	0	0	0	0	0	0	0	0	0	0	0	0	0	0	0	0	0	0	0	0	0	0	0	0	0	0	0	0	0	0	0	0	0	0	0	0	0	0	0	0	0	0	0	0	0	0	0	0	0
384	0	0	-0.00277184910053497	0	0	0	0	0	0.0245848133866416	0.00455944374786276	0	0	-0.000923949700178322	0	0	0	-0.000923949700178322	0	0	-0.00234002662696023	-0.000923949700178322	0	-0.000923949700178322	-0.00141607692678191	0.00911888749572552	-0.00184789940035664	0	0	0	0.0205174968653824	0	0	0	-0.00141607692678191	0.00455944374786276	0.00135577217375306	0	0	0	-0.000923949700178322	0	0	0	0	0	-0.000923949700178322	0	0.00455944374786276	-0.000923949700178322
385	0	0	0	0	0	0	0	0	0	0	0	0	0	0	0	0	0	0	0	0	0	0	0	0	0	0	0	0	0	0	0	0	0	0	0	-0.000517408198850319	0	0	0	0	0	0	0	0	0	0	-0.000517408198850319	0	0.00260450579502539
386	0	0	-0.0024873643202283	0	0	-0.0010001300169022	0	0	0	0	0	-0.01787408387162	0.00170963550571018	0	0	-0.00200026003380439	0	0.00170963550571018	0	0	0	0	0	0	-0.00916353824759447	0	0	-0.00700091011831538	0	0	0	0	0	0	0	0	-0.0010001300169022	0	0	0	0	0	0	0	-0.0010001300169022	0	0.00583841200593853	0	0
387	0	0	0	0	0	0	0	0	0	0	0	0	0	0	0	0	0	-0.00354572208630288	0	0	0	0	0	-0.00098994219006754	-0.00020702333698364	0.00255577989623534	0	0	0	0	0	0	0	0	0	0	0	0	0	0	0	0	0	0	0	0	0	0	0
388	0	0	0	0	0	0	0	0	0	0	0	0	0	0	0	0	0	0	0	0	0	0	0	0	0	0	0	0	0	0	0	-0.00132340777502068	0	0	0	0	0	0	0	0	0	0	0	0	0	0	0	0	0
389	0	0	0	0	-0.000193490028007682	0	0	0	-0.000290235042011522	0	0	-0.000193490028007682	0	0.000293902406766809	0	0	0	0	0	0	0	0	0	0	0	0	0	0	0	0	0	0	0	0	0	0	0	0	0	0	0	0	0	0	0	0	0.000587804813533618	0	0
390	0	0	0	0	0	0	0	0	0	0	0	0	0	0	0	0	0	0	0	0	0	0	0	0	0	0	0	0	0	0	0	0	0	0	0	0	0	0	0	0	0	0	0	0	0	0	0	0	0
391	0	0	0	0	0	0	0	0	0	0	0	0	0	0	0	0	0	0	0	0	0	0	0	0	0	0	0	0	0	0	0	0	0	0	0	0	0	0	0	0	0	0	0	0	0	0	0	0	0
392	0	0	0	0	0	0	0	0	0	0	0	0	0	0	0	0	0	0	0	0	0	0	0	0	0	0	0	0	0	0	0	0	0	0	0	0	0	0	0	0	0	0	0	-0.0141823854772373	0	0	0	0	0
393	0	0	0	0	0	0	0	0	0	0	0	0	0	0	0	0	0	0	0	0	0	0	0	0	0	0	0	0	0	0	0	0	0	0	0	0	0	0	0	0	0	0	0	0	0	0	0	0	0
394	0	0	0	0	0	0	0	0	0	0	0	0	0	0	0	0	0	0	0	0	0	0	0	0	0	0	0	0	0	0	0	0	0	0	0	0	0	0	0	0	0	0	0	0	0	0	0	0	0
395	0	0	0	0	0	0	-0.000225622096525645	0	0	0	0	0	0	0	0	0	0	0	0	0	0	0	0	0	0	0	0	0	0	0	0	0	0	0	0	0	0	0	0	0	0	0	0	0	0	0	0	0	0
396	0	0	0	0	0	0	0	0	0	0	0	0	0	0	0	0	0	0	0	0	0	0	0	0	0	0	0	0	0	0	0	0	0	0	0	0	0	0	0	0	0	0	0	0	0	0	0	0	0
397	0	-0.00181054461181924	0	0	0	0	0.00531914893617021	0	0	0	0	0	0	0	0	0	0	0	0	0.00531914893617021	0	-0.00181054461181924	0	0	0	0	0	-0.00362108922363847	0	0	0	0	0	0	0	0	0	0.00531914893617021	0	0	0	0	0	0	0	0	0	0	0
398	0	0	0	0	0	0	0	0	0	0	0	0	0	0	0	0	0	0	0	0	0	0.0294377391816309	0	0	0	0	0	0	0	0	0	0	0	0	0	0	0	0	0	0	0	0	0	0	0	0	0	0	0
399	0	0	0	0	0	-0.000208094458236483	0	0	0	0	0	0	0	0	0	0	0	0	0	0	0	0	0	-0.000624283374709448	0	0	0	0	0	0	0	0	-0.000416188916472965	-0.000208094458236483	0	0	0	0	0	0	0	0	0	0	0	0	0	0	0
400	0	0	0	0	0	0	0	0	0	0	0	0	0	0	0	0	0	0	0	0	0	0	0	0	0	0	0	0	0	0	0	0	0	0	0	0	0	0	0	0	0	0	0	0	0	0	0	0	0
401	0	0	0	0	0	0	0	0	0	0	0	0	0	0	0	0	0	0	0	-0.0104253544620517	0	0	0	0	0	0	0	0	0	0	0.0479846449136276	-0.0104253544620517	0	0	0	0	0	0	0	0	0	0	0	0	0	0	0	0	0
402	0	0	0	0	0	0	0	0	0	0	0	0	0	0.00497462939011044	0	0	0	0.00497462939011044	-0.00220541208124738	0	0	0	0.00553843461772611	0	0	0	-0.00220541208124738	0	0	0.00497462939011044	0	0	0	0	0.00774384669897349	0	0	0	0	0	0	0	0	0	0	0	0	-0.00220541208124738	-0.00441082416249476
403	0	0	0	0	-0.000161417113119499	0	0	0	0	0	-0.000161417113119499	0	0	0	0	0	0	0	0	0	-0.000161417113119499	0	-0.000484251339358496	0.000611153538466589	-0.000484251339358496	0	0	-0.00562624150210858	0	-0.000195932027130904	0	0	-0.000484251339358496	0	0	0	0	0	-0.00145275401807549	0	0	0.000738055737574686	0	0	0	0	0	0	0
404	0	0	0	0	0	0	0	0	0	0	0	0	0	0	0	0	0	0	0	0	0	0	0	0	0	0	0	0	0	0	0	0	0	0	0	0	0	0	0	0	0	0	0	0	0	0	0	0	0
405	0	-0.00394535389167319	0	0	-0.000174998031272148	0	0	0	-0.000349996062544296	0	0	0	0	0	0	0	0	0	0	0	0	0	0	0	0	0	-0.000349996062544296	-0.000174998031272148	0	0	0	0	0	0	0	0	0	0	0	0	0	0	0	0	0	0	0	0	0
406	0	0	0	0	0	0	0	0	0	0	0	0	0	0	0	0	0	0	0	0	0	0	0	0	0	0	0	0	0	0	0	0	0	0	0	0	0	0	0	0	0	0	0	0	0	0	0	0	0
407	0	0	0	0	0	0	0	0	0	0	0	0	0	0	0	0	0	0	0	0	0	0	0	0	0	0	0	0	0	0	0	0	0	0	0	0	0	0	0	0	0	0	0	0	0	0	0	0	0
408	0	0	0	0	0	0	0	0	0	0	0	0	0	0	0	0	0	0	0	0	0	0	0	0	0	0	0	0	0	0	0	0	0	0	0	0	0	0	0	0	-0.00231755081230156	0	0	-0.00231755081230156	0	0	0	0	0
409	0.00444715095514093	-0.0128301033448316	-0.00746082546862471	0.00187777788217073	-0.00046106346053299	0	-0.0153994764178018	0.0025693730729702	-0.00559980960647338	-0.00443038893512152	0.00630816681729224	-0.00979966681132841	-0.00139995240161835	-0.00023053173026649	0	-0.00139995240161835	0	0	0.0025693730729702	-0.00279990480323669	0	0	-0.00139995240161835	0	0	0	0	0	0	0	0	0	0	-0.00139995240161835	0	0	0	0	0	0	-0.00139995240161835	0	-0.00279990480323669	0	0.00513874614594039	0.0025693730729702	0	0	0
410	0	0	0	0	0	0	0	0	0	0	0	0	0	0	-0.00109493047191503	0	0	0	0	0	0	0	0	0	-0.00119982074819813	0	0	0	0	0	0	0	0	0	0	0	0	0	0	0	0	0	0	0	0	0	0	0	0.000990040195631943
411	0	0	0	0	0	0.0273259730309097	0	0	-0.00253549695740365	0	0	0	0	0	0	0	0	0	0	0	0	0	0	0	0	0	0	0	0	0	0	0	0	0	0	0	0	0	0	0	0	0	0	0	0	0	0	0	0
412	0	0	0	0	0	0	0	0	-0.00175183504721195	0	0	0	0	0	0	0	0	0	0	0	0	0	0	0	0	0	0	0	0	0	0	0	0	0	0	0	0	0	0	0	0	0	0	0	0	0	0	0	0
413	0	0	0	0	0	0	0	0	0	0	0	0	0	0	0	0	0.00708918190840777	0	-0.00420804578353812	0.00708918190840777	0	0	0	0	0	0	0	0	0	0	0	0	0	0	-0.00420804578353812	0	0	0	0	0	0	0	0	0	0	0	0	0	0
414	0	0	0	0	0	0	0	0	0	0	0	0	0	0	0	0	0	0	0	0	0	0	0	0	0	0	0	0	0	0	0	0	0	0.0167266036631262	0	0	0	0	0	0	0	0	0	0	0	0	0	0	0
415	0	0	0	0	0	0.00261882938326568	0	0	0	0	0	0	0	0	0	0	0	0	0	0	0	0	0	0	-0.00224502166445906	0	0	0	0	0	0	0	0	0	-0.00224502166445906	0	0	0	0	0	-0.00224502166445906	0	0	0	0	0	0	0	0
416	0	0	0	0	0	0	0	0	0	0	0	0	0	0	0	0	0	0	0	0	0.00281706011606288	0	0	-0.000853346683468115	0	0	0.00194999901817934	0	0	0	0	0	0	0	0	0	0	0	0	0	0	0	0	0	0	0	0	0	0
417	0	0	0	0	0	0	0	0	0	0	0	0	0	0	0	0	0	0	0	0	0	0	0	0	0	0	0	0	0	0	0	0	0	0	0	0	0	0	0	0	0	0	0	0	0	0	0	0	0
418	0	0	0	0	0	0	0	0	0	0	0	0	0	0	0	0	0	0	0	0	0	0	0	0	0	0	0	0	0	0	0	0	0	0	0	0	0	0	0	0	0	0	0	0	0	0	0	0	0.0312662845231892
419	0	0	0	0	0	0	0	0	0	0	-0.00686577411603158	0	0	0	0	0	0	0	0	0	0.0151906425641805	0	0	0	0	0	0	0	0	0	0.0151906425641805	0	0	0	0	0	0	0	0	0	0	0	0	0	0	0.0759532128209023	0	0	0
420	-0.0139235407441949	-0.0086703763994852	-0.00012953954522699	-0.00163044364371545	-0.0155539843879103	-0.0113103511828989	-0.00489133093114637	-0.0139235407441949	-0.00012953954522699	-0.00087999159447122	0.0668973732712077	-0.00175998318894244	-0.00326088728743091	-0.00815221821857728	-0.00251043523818668	-0.0043999579723561	-0.00414087888190213	0	0	0.00476179138591938	0.00952358277183877	-0.00163044364371545	0.00238089569295969	-0.00163044364371545	0	0	-0.00163044364371545	0	0.00238089569295969	0.00476179138591938	0	-0.00163044364371545	0	0	-0.00978266186229273	-0.00326088728743091	-0.00163044364371545	0.00238089569295969	0	0	-0.00163044364371545	0.00476179138591938	0	0	-0.00087999159447122	0	-0.00163044364371545	0.00714268707887907	0
421	0	0	0	0	0	0	0	-0.0619195046439628	-0.123839009287926	0	0	-0.0928792569659443	0	0	-0.0309597523219814	0	-0.278637770897833	0	0.0206931402400021	-0.0619195046439628	0	0	0	0	0	0	0	0	0	0	0	0	0	0	0	-0.0619195046439628	0	0	-0.0309597523219814	0	0	-0.0309597523219814	0	0	0.289703963360029	-0.0309597523219814	0	0.0413862804800042	0
422	0	0	0	0	0	0	0	0	0	0	0	0	0	0	0	0	0	0	0	0	0	0	0	0	0	0	0	0	0	-0.0298195914715968	0	0	0	0	0	0	0	0	0	0	0	0	0	0	0	0	0	0	0
423	0	0	0	0	0	0	0	0	0	0	0	0	0	0	0	0	0	0	0	0	0	0	0	0	0	0	0	0	0	0	0	0	0	0	0	0	0	0	0	0	0	0	0	0	0	0	0	0	0
424	0	0	0	0	0	0	0	0	0	0	0	0	0	0	0	0	0	0	0	0	0	0	0	0	0	0	0	0	0	0	0	0	0	0	0	0	0	0	0	0	0	0	0	0	0	0	0	0	0
425	0	0	0	0	0.000859949370319819	0	0	0	0	0	0	0	0	0	0	-0.000557485073337161	0.00141743444365698	0	0	0	0	0	0	0	0	0	0	0	0	0	0	0	0	0	0	0	0	0	0	0	-0.000557485073337161	0	0	0.00141743444365698	0	0	0	-0.000557485073337161	0
426	0	0	0	0	0	0	0	0	0	0	0	0	0	0	0	0	0	0	0	0	0	0	0	0	0	0	0	0	0	0	0	-0.00241893542651879	0	0	0	0	0	0	0	0.00972726329784141	0	0	0	0	0	0	0	0	0
427	0	0	0	0	0	0	0.0067389483717855	0	-0.0136382470319452	0.00437464456012949	0	0	-0.01434617315831	0	0	0.0182866795110699	0.00437464456012949	-0.00358654328957751	0	0	0	0.0166303018257788	0.00437464456012949	0	-0.01434617315831	0	0	0	0	0	0.00437464456012949	0.0111135929319149	0	0.0615188117608084	0	0	-0.0299145857945416	-0.00997152859818051	0	0.00874928912025898	-0.0107596298687325	0	-0.0107596298687325	0	0.0232890750533769	-0.00717308657915501	-0.787944372031069	0.00078810127055198	0
428	0	0	0	0	0	0	0	0	0	0	0	0	0	0	0	0	0	0	0	0	0	0	0	0	0	0	0	0	0	0	0	0	0	0	0	0	0	0	0	0	0	0	0	0	0	0	0	0	0
429	0	0	0	0	0	0	0	0	0	0	0	0	0	0	0.0701557901053492	0	0	-0.00618008775724615	0	0.3845791556805	0.0508905852417303	-0.0370805265434769	0	0.41475465287485	0	-0.00618008775724615	0	0	0	0.0130851171063728	0	-0.0185402632717385	0.0192652048636189	0.950555681096778	0.0508905852417303	0	0.0254452926208651	0	0	0	0	0	0	0	0	0	0	0	0
430	0	0	0	0	0	0	0	0	-0.00883080183680678	0	0	0	0	0	0	0	0	0	0	0	0	0	0	0	0	0	0	0	0	0	0	0	0	0	0	0	0	-0.00883080183680678	0	0	0	0	0	0	0	0	0	0	0
431	0	0	0	0	0	0	0	0	0	0	0	0	0	0	0	0	0	0	0	0	0	0	0	0	0	0	0	0	0	0	0	0	0	0	0	0	0	0	0	0	0	0	0	0	0	0	0	0	0
432	0	0	0	0	0	0	0	-0.0191314329443275	0	0	0	0	0	0	0	0	0	0	0	0	0	0	0	0	0	0	0	0	0	0	0	0	0	0	0	0	0	0	0	0	0	0	0	0	0.0643410211458227	0	0	0	0
433	0	0	0	0	0.00482905157427081	0	0	0	0	0	0	0	0	0	0	0	0	0	0	0	0	0	0	0	0	0	0	0	0	0	0	0	0	0	0	0	0	0	0	0	0	0	0	0	0	0	0	0	0
434	0	0	0	0	0	0	0	0	0	0	0	0	0	0	0	0	0	0	0	0	0	0	0	0	0	0	0	0	0	0.000117392481906508	0	0	-0.000285834336135463	0	0	0	0	0	0	0	0	0	0	-0.000285834336135463	0	-0.000285834336135463	0	0	-0.00188344787104173
435	0	0	0	-0.0103939299449122	0.0201126307320998	-0.0103939299449122	0	0	0	0	0	0	0	0	0	0	0	0	0	0	0	0	0	0	0	0	0	0	0	0.00229118005221701	0	0	0	0	0.0201126307320998	0	0	0	0	0	0	0	0	0	0	0	0	0	0
436	0	0.00953241712052795	0	0	0	0.0423071499083345	0	0	-0.00228498309112513	0	0.0282047666055563	0	0	0	0	0	0	0	-0.00228498309112513	0	0	0	0	0	0	0	0	0	0	0	0	0	0	0	0	0	0	-0.00456996618225025	0	0	0	0.0141023833027782	0	0	-0.0091399323645005	0	0	0	0
437	0.000937068488331114	0	0	0	0	0	0	-0.000214633727543946	0	0.00115170221587506	0	0	-0.000858534910175785	0	0	0	0.00165950324911829	0	0	0	0	0	0	0	0	0	0	0	0	0	0	0	0	0	0	0	0	0	0	0	-0.000214633727543946	0	0	-0.000429267455087892	0	0	0	-0.000643901182631839	-0.000214633727543946
438	0	0	0	0	0	0	0	0	0	0	0	0	0	0	0	0	0	0	0	0	0	-0.000161626610205104	0	0	0	0	0	0	-0.000161626610205104	0	0	0	0	0	0	0	0	0	0	0	0	0	0.000232701548628806	0	-0.000323253220410208	0	0	0.000465403097257612	0
439	0	0	0	0	0	0	0	0	0	0	0	0	0	0	0	0	0	0	0	0	0	0	0	-0.00526555972899919	0	0	-0.00275162062227215	0	0	0	0	0	0	0	0	0	0	0.00213456284153005	0	0.00213456284153005	0	0	0	0	0	0	0	0	0
440	0	0	0	0	0	0	0	0	0	0	0	0	0	0	0	0	0	0	0	0	0	0	0	0	0	0	0	0	0	0	0	0	0	0	0	0	0	0	0.0112790435371081	0	0	0	-0.00523834468308015	0	0	0	0	0	0
441	0	0	0	0	0.0197550375345713	0	0	0	0	0	0	0	0	0	0	0	0	0	0	0	0	0	0	0	0	0	0	0	0	0	0	0	0	0	0	-0.00930665425779432	0	0	0	-0.00930665425779432	0	-0.00930665425779432	0	-0.00930665425779432	0	0	0	0	0
442	0	0.00177278949443553	0	0	-0.00238971466806863	0	0	0	-0.00477942933613727	0	0	0	-0.0037015510417986	0.0118705873138794	-0.00238971466806863	0	-0.00477942933613727	0.0195786704652546	0	0	0	0	-0.0012338503472662	0	-0.00955885867227453	0	0	-0.00061692517363311	0	0	0	0	-7.79860264637014e-05	-0.00539635450977037	0	-0.0096368446987383	0	-0.00238971466806863	0	0	-0.00238971466806863	-0.0018507755208993	0	0	0	-0.00955885867227453	0	0	0
443	0	0	0	0	0	0	0	0	0	0	0	0	0	0	0	0	0	0	0	0	0	0	0	0	0	0	0	0	0	0	0	-0.00129002296240873	0	0	0	0	0	0	-0.00129002296240873	0	0	0	0	0	0	0	0	0	0
444	0	0	0	0	0	0	0	0	0	0	0	0	0	0	0	0	0	0	0	0	0	0	0	0	0	0	0	0	0	0	0	0	0	0	0	0	0	0	0	0	0	0	0	0	0	0	0	0	0
445	0	0	0	0	0	-0.00310896937665164	0.018216042261218	0	0	0	0	0	0	0	0	0	0	0	0	0.00607201408707268	0	0	0	0	0	0	0	0	0	0	0	0	0	0	0	0	0	0	0	0	0	0	0	0	0	0	0	0	0
446	0	0	0	0.0049982506122857	0	0	0	0	0	0	0	0	0	0	0	0	0	0	0	0	0	0	0	0	0	0	0	0	0	0	0	0	0	0	0	0	0	0	0	0	0	0	0	0	0	0	0	0	0
447	0	0	0	0	0.00775494377665762	0	0	0	0	0	0	0	0.00374419496985539	0.0155098875533152	0	0	0	0	0	0	0	0	0	0	0	0	0	0.00775494377665762	0	0.011499138746513	0	0	0	-0.0160429952272089	-0.00401074880680223	0	0	0	0	0.00775494377665762	0	-0.00401074880680223	0	0	0.0155098875533152	0.00775494377665762	0	0	0
448	0	-0.00427058421592074	0	0	0	0	-0.00427058421592074	0	0	0.00594848611028493	0	0	0	-0.00854116843184148	0	0.00594848611028493	0	-0.00427058421592074	0	0	0	0.00594848611028493	-0.00427058421592074	0	0	0	-0.00854116843184148	0.00762638800464916	0	0	0	-0.017082336863683	0	-0.0128117526477622	0	0	0.00594848611028493	0	0	0	0	-0.00854116843184148	0	0.00594848611028493	-0.00427058421592074	0	0	0	0
449	0	0	0	0	0	0	0	0	0	0	0	0	0	0	0	0	0	0	0	0	0	0	0	0	0	0	0	0	0	0	0	0	0	0	0	0	0	0	0	0	0	0	0	0	0	0	0	0	0
450	0.00132850773105001	0.00115440529050707	0	0	0	0.00167435849471869	0.00103990640842324	0	0	-0.000868158085297499	0	-0.000231351881584853	0	0	0.00184846093526163	0	0	-0.000231351881584853	0	0	0	0	0	0	0	0	0	0	0	0	0	-0.000231351881584853	0	0.00155985961263486	-0.000231351881584853	0	0	-0.000231351881584853	0	0	0	0	0	0	0	-0.000231351881584853	0	0	0
451	0	0	0	0	0	0	0	0	0	0	0	0	0	0	0	0	0	0	0	0	0	0	0	0	0	0	0	0	0	0	0	0	0	0	0	0	0	0	0	0	0	0	0	0	0	0	0	0	0
452	0	0	0	0	0	0	0	0	0	0	0	0	0	0	0	0	0	0	0	0	0	0	0	0	0	0	0	0	0	0	0	0	0	0	0	0	0	0	0	0	0	0	0	0	0	0	0	0	0
453	0	0	0	0	0	0	0	0	0	0	0	0	0	0	0	0	0	0	0	0	0	0	0	0	0	0	0	0	0	0	0	0	0	0	0	0	0	0	0	0	0	0	0	0	0	0	0	0	0
454	0	0	0	0	0	0	0	0	0	0	0	0	0	0	0	0	0	0	0	0	0	0	0	0	0	0	0	0	0	0	0	0	0	0	0	0	0	0	0	0	0	0	0	0	0	0	0	0	0
455	0	0	0	0	0	0	0	0	0	0	0	0	0	0	0	0	0	0	0	0	0	0	0	0	0	0	0	0	0	0	0	0	0	0	0	0	0	0.0144901285998913	0	0	0	0	0	0	0	0	0	0	0
456	0	0	0	0	0	0	0	0	0	0	0	0	0	0	0	0	0	0	0	0	0	0	0	0	0	0	0	0	0.00526288090100521	0	0.0578916899110573	0.0157886427030156	0	0	0	0	0	0	0.0157886427030156	0	0	0	0	0	0	0	0	0	0
457	0	-0.00912658574427307	0	0	0	0	0	0	0	0	-0.00456329287213653	0	0	0	0	0	0	0	0	0	-0.00228164643606827	0	0	0	0	0	0	0	0	0	0	0	0	-0.00228164643606827	0	0	0	-0.00228164643606827	0	-0.0182531714885461	0	-0.0295117169953552	-0.0114082321803413	-0.0178041114679494	0	-0.0068449393082048	0	-0.0044136061986043	0
458	0	0	0	0	0	-6.4075865825137e-05	0	0	0	0	0	0	-6.4075865825137e-05	0	0	0	0	0	0	0.000385139025559751	0	0	0	0.000962847563899379	0.000192569512779876	0	0	0	0	0	0	0	0	0	0	0	0	0	0	0	0	0	0	0	0	0	0	0	0
459	0	0	0	0	0	0	0	0	0	0	0	0	0	0	0	0	0	0	0	0	0	0	0	0	0	0	0	0	0	0	0	0.0316404591791417	0	0	-0.0106786267286027	0	0	0	0	0	0	0	0	0	0	0	0	0	0
460	0	0	0	0	0	0	0	0	0	0	0	0	0	0	0	0	0	0	0	0	0	0	0	0	0	0	0	0	0	0	0	0	0	0	0	0	0	0	0	0	0	0	0	0	0	0	0	0	0
461	0	0	0	0	0	0	0	0	0	0.0357015351660121	0	0	0	0	0	0	0	0	0	0	0	0	0	0	0	0	0	0	0	0	0	0	0	0	0	0	0	0.788766274307153	0.107104605498036	0	0	0	0	0	0	0	0	0	0
462	0	0	0	0	0	0	0	0	0	0	0	0	0	0	0	0	0	0	0	0	0	0	0	0	0	0	0	0	0	0	0	0	0	0	0	0	0	0	0	0	0	0	0	0	0	0	0	0	0
463	0	0	0	0	0	0	0	0	0	0	0	0	0	0	0	0	0	0	0	0	0	0	0	0	0	0	0	0	0	0	0	0	0	0	0	0	0	0	0	0	0	0	0	0	-0.00647372275473088	0	0	0	0
464	0	0	-0.00366059008712204	0	0	0	0	0	0	0	0	0	-0.00732118017424409	0	0	0.0128131206355308	0	0	0	0.0128131206355308	-0.00366059008712204	0	0	0	0	0.00915253054840876	0	0	0	0	-0.0109817702613661	0	0	0	0	0	0	0	0.00640656031776539	0	0	0	0	0	0	0	0	0	0
465	0	0	0	0	0	0	0	0	0	0	0	0	0	0	0	0	0	0	0	0	0	0	0	0	0	0	0	0	0	0	0	0	0	0	0	0	0	0	0	0	0	0	0	0	0	0	0	0	0
466	0	0	0	0	0	0	0	0	0	0	0	0	0	0	0	0	0	0	0	0	0	0	0	0	0	0	-0.00170633904956915	0	0	0	0	0	0	0	0	0	0	0	0	0.00481788398535363	0	0	0	0	0	0	0	0	0
467	0	0	0	0	0	0	0	0	0	0	0	0	0	0	0	0	0	0	0	0	0	0	0	0	0	0	0	0	0	0	0	0	0	0	0	0	0	0	0	0	0	0	0	0	0	0	0	0	0
468	0	0	0	0	0	0.000641165382198684	0	-0.00046990935448552	0	0.00658290984970001	0	0	0	0	0	0	0	0	0	0	0	0	0	0	0	0	0	0	0	0	0	-0.00046990935448552	0	0	0	0	0	0	0	-0.00046990935448552	0	0	0	0	0.00051376808313949	0	-0.00046990935448552	0.0016248428198237	0.000641165382198684
469	0	0	0	0	0	0	0	0	0	0	0	0	0	0	0	0	0	0	0	0	0	0	0	0	0	0	0	0	0	0	0	0	0	0	0	0	0	0	0	0	0	0	0	0	0	0	0	0	0
470	0	-0.147921106551036	-0.01557753719137	0	-0.00778876859568502	-0.00389438429784251	-0.0389438429784251	-0.00389438429784251	-0.01557753719137	0	0	-0.00389438429784251	-0.286953811711115	-0.0205060575175053	-0.0264687138719332	-0.00778876859568502	-0.01557753719137	-0.17023344905721	-0.0116831528935275	0	0	0	0	0	0.0023759286388931	0	0	0.00468636051080688	0	0	0.000549816397635999	0.00858074480864939	0	0	0	0	0	0	0	0	-0.00778876859568502	0	0	0.00182611224125708	0	0.00572049653909959	0	0	0
471	0	0	0	0	0	0	0	0	0	0	0	0	0	0	0	0	0	0	0	0	0	0	0	-0.0181290790427846	0.0158252888115208	0	0	-0.00906453952139231	0	0	0	0	0	0	0	0	0	0	0	0	0	0	-0.00906453952139231	0.0158252888115208	0	0	0	0	0
472	0	0	0	0	0	0	0	0	-0.0110574619439018	0.00916002564807182	0	0	0	0	0	0	0	0	0	0	0	-0.00368582064796727	0	0	0	0	0	0	0	0	0	0	0	0	0	0	0	-0.00368582064796727	0	0.0109484100002091	0	0	0.0601072030574577	0	0	0	0	0	0
473	0	0	0	0	0	0	0	0	0	0	0	0	0	0	0	0	0	0	0	0	0	0	0	0	0	0	0	0	0	0	0	0	0	0	0	0	0	0	0	0	0	0	0	0	0	0	0	0	0
474	0	-0.00785854616895874	0	0	0	0	0	0	0	0	0	0	0	0	0	0	0	0.0229489386115892	0	-0.0235756385068762	0	0	0	0	0	0	0	0	0	0	0	-0.0235756385068762	0	-0.0550098231827112	0	0	0	0	0	0	0	0	0	0	0	0	0	0	0
475	0	0	0	0	0	0	0	0	0	0	0	0	0	0	0	0	0	0	0	0	0	0	0	0	0	0	0	0	0	0	0	0	0	0	0	0	0	0	0	0	0	0	0	0	0	0	0	0	0
476	0	0	0	0	0	0	0	0	0	0.00542093565349379	0	-0.00336496399488525	0.00542093565349379	0	0	0	0	0	0	0	0	0	0.00205597165860854	0	0	0	0	0	0	0.0162628069604814	-0.00336496399488525	0	0	0	0	0	0	0	0	0	0	-0.0100948919846558	0	-0.00672992798977051	0	0	0	0	0
477	0	0	0	0	0	0	0	0	0	0	0	0	0	0	0	0	0	0	0	0	0	0	0	0	0	0	0	0	0	0	0	0	0	0	0	0	0	0	0	0	0.00762718328121425	0	0.0228815498436427	0	0	0.0152543665624285	0	0	0
478	0	0	0	0	0	0	0	0	0	0	0	0	0	-0.00050979312594949	0	0	0	0	0	0	0	0	0	0	0	0	0	0	0	0	0	0	0	0	0	0	0	0	0	0	0	0	0	0	0	0	0	0	0
479	0.0564865373752589	0	0	0	0.277231704935746	-0.0107146683810136	0	0	0	0	-0.034744496113315	0	0	0	0	0.0324567096429575	0.018828845791753	0.0376576915835059	1.37284336532745	0	0.018828845791753	0	0	0	0.25060138623317	0	0	0.10777209280997	0.018828845791753	0	0.250288681733253	0.018828845791753	0	0	0.210030499179473	0.0376576915835059	-0.0133151593512878	0.0350572006132317	0	0	0	0.0753153831670119	0	0.0646007147859983	0	0.317489887489526	0	0	0
480	0.00660414740457007	0	0	-0.00264634275431354	0	0	0.0198124422137102	0	0.00660414740457007	-0.00529268550862708	0	0.0198124422137102	0	0.0198124422137102	0.0132082948091401	-0.00264634275431354	0	0.0118734139507696	0	-0.00264634275431354	-0.00793902826294062	0.0264165896182803	-0.00529268550862708	0.00660414740457007	0	0	0	0	0.0198124422137102	0	0.00660414740457007	-0.00264634275431354	0.00791560930051302	0	0	-0.00264634275431354	0	-0.00133488085837055	0.0237702468639668	0.0396014654649929	0.0871653781553539	0.0528331792365606	0.043582689077677	0	0	0.00395780465025653	0	0	-0.00529268550862708
481	0	0	0	0	0	0	0	0	0	0	0	0	0	0	0	0	0	0	0	0	0	0	0	0	0	0	0	0	0	0	0	0	0	0	0	0	0	0	0	0	0	0	0	0	0	0	0	-0.00115791667631597	0
482	0	0	0	0	0	0	0	0	0	0	0	0	0	0	0	-0.000167963061563501	0	0	0.000377291574701845	0	0	0	0	0	0	0	0	-0.000167963061563501	0	0	0	0	0	0	0	0	0	0	0	0	0	0	0	0	0	0	0	0	0
483	0	0	0	0	0	0	0	0	0	0	0	0	0.013412017167382	0	0	0	0	0	0	0	0	0	-0.00751766651631334	0	0.00589435065106866	0	0	0	0	0	0	0	0	0	0	0	0	0	0	0.00589435065106866	0	0	0	0	0	0	0	0	0
484	0	0	0	0	0	0	0	0	0	0	0	0	0	0	0	0	0	0	0	0	0	0	0	0	0	0	0	0	0	0	0	0	0	0	0	0	0	0	0	0	0	0	-0.00607561097862904	0	0	0	0	0	0
485	0	0	0	0	0	0	0	0	0	0	0	0	0	0	0	-0.0087404947120007	0	0	0	0	0	0	0	0	0	0	0	0	0	0	0	0	0	0	0	0	0	0	0	0	0	0	0	0	0	0	0	0	0
486	0	0	0	0	0	0	0	0	0	0	0	0	0	0	0	0	0	0	0	0	0	0	0	0	0	-0.00106614354556698	0	0	0	0	0	0	0	0	0	0	0	0	0	0	0	0	-0.00106614354556698	0	0	0	0	0	0
487	0	0	0	0	0	0	0	0	0	0	0.147835261367128	0	0	0	0	0	0	0	0	0	0	0	-0.110558319513543	0	0	0	0	0	0	0	-0.030427865187715	-0.0552791597567717	0	0.1354096140826	-0.110558319513543	0	0	-0.485086790526417	0	0	-0.221116639027087	0	0	-0.497512437810945	0	-0.0552791597567717	0	-0.374528471012874	0
488	0	0	0	0	0	0	0	0	0	0	0	0	0	0	0	0	0	0	0	0	0	0	0	0	0	0	0	0	0	0	0	0	0	0	0	0	-0.0371402042711235	0	0	0	0	0	0	0	0	0	0	0	0
489	0.0528820729772607	0	0.0176273576590869	0.0352547153181738	0	-0.00985221674876847	-0.00207707583845	0	0	0	0	-0.00985221674876847	0	-0.0197044334975369	-0.00985221674876847	0	0.0352547153181738	0	0.078284571546666	0.0331776394797238	0.0352547153181738	-0.00985221674876847	0.0705094306363476	-0.00985221674876847	0	0.0352547153181738	-0.00985221674876847	0.0134732059821868	-0.0295566502463054	0.00777514091031843	0.0508049971388107	0.0176273576590869	0.0352547153181738	0	0	-0.00985221674876847	0	0	0	0	0	-0.0119292925872185	0	0	-0.00985221674876847	0.0176273576590869	0	-0.00985221674876847	0
490	0	0	0	0	0	0	0	0	0	0	0	0	0	0	0	0	0	0	0	0	0	0	0	0	0	0	0	0	0	0	0	0.00136008160489629	0	0	0	0	0	0.00136008160489629	0	0	0	0	0	0	0	0	0	0	0
491	0	0	0	0	0	0	0	0	0	0	0	0	0	0	0	0	0	0	0	0	0	0	0	0	0	0	0	0	0	0	0	0	0	0	0	0	0	0	0	0	0	0	0	0	0	0	0	0	0
492	0	0.65212137272361	0.079660629424119	0.0627024767478315	-0.0393473970948205	0	0	0.496188722240406	0.0104504127913053	0	0	0.0104504127913053	0	0	0.0104504127913053	0	0	0	0	0	0	0	0.0104504127913053	0	0	0	0	0	0	0	0	0	0	0	0.0627024767478315	0	0	0	0	0	0	0	0	0.0386031876768591	0	0.0104504127913053	0	0	0
493	0	-0.0134934556739981	0	0	0	0	0	0	0	0	0	0	0	0	0	0	0	0	0	0	0	0	0	0	0	0	0	0	0	0	0	0	0	0	0	0	0	0	0	0	0	0	0	0	0	0	0	0	0
494	-0.147290788877571	-0.012961309046568	-0.001888526794322	0.033566641459281	-0.592880748248817	0.034703386810147	0.047450771247096	-0.00751643407338741	-0.0121056733517828	-0.000644725023112101	0.0039934274430019	-0.0087599848698388	-0.049424880434003	0.000464330193036003	-0.00408214926091249	0.014950111461067	-0.032436676908581	-0.189950640219505	-0.0340773728516061	-0.034810694205249	-3.48979418601728	-1.03901735529299	-0.021275110094736	-0.0037674470816	0.018769422924641	0.011815270907106	0.021244343278382	0.012615777307212	-0.003901879918214	-0.020535698121511	-0.00502330460459299	-0.017486502703825	0.074683811464697	0.023856710406682	0.085493944150674	-0.00908699377569303	-0.033478547078267	-0.0137556620834031	-0.0061842869464052	-0.205665090825327	-0.047133557079354	-0.0030311745337	-0.090526667031243	-0.0139695239493317	-0.0458896925644555	-0.00456795348170569	-0.0307346983076077	-0.029995286334383	0.000345218020908096
495	0	0	0	0	0	0	0	0	0	0	0	0	0	0	0	0	0	0.0131769666622743	0	-0.00430098277456399	0.0131769666622743	0	0	0	0	0	-0.00430098277456399	0	0	0	0	0	0	0	0	0	0	0	0	0	0	0	0	0	0	0	0	0	0
496	0	0	0	0	0	0	0	0	0	0	0	0	0	0	0	0	0	0	0	0	0	0	0	0	0	0	0	0	0	0	0	0	0	0	0	0	0	0	0	0	0	0	0	0	0	0	-0.010527423939362	0	0
497	0	0	0	0	0	0	0	0	0	0	0	0	0	0	0	0	0	0	0	0	0	0	0	0	0	0	0	0	0	0	0	0	0	0	0	0	0	0	0	0	0	0	0	0	0	0	0	0	0
498	0	0	0	0	0	0.0339270568278202	0	0	0	0	-0.00315030085373153	0	0	0	-0.00315030085373153	0	0	0	0	0	-0.00945090256119459	0	0	0	0	0	0	0	0	0	0	0	0	-0.00315030085373153	0	0	0	0	0	0	0	0	0	0	0	0	0	0	0
499	0	0	0	0	0	0	0	0	0	0	0	0	0	0	0	0	0	0	0	0	0	0	0	0	0	0	0	0	0	0	0	0	0	0	0	0	0	0	0	0	0	0	0	0	0	0	0	0	0
500	0	0	0	0	0	0	0	0	0	0	0	0	0	0	0	0	0	0	0	0	0	0	0	0	0	0	0	0	0	0	0	0	0	0	0	0	0	0	0	0	0	0	0	0	0	0	0	0	0
501	0	0	-0.119089509320292	-0.0587659157688541	-0.450538687561215	0	0	-0.019588638589618	0	-0.137120470127326	0	0	-0.039177277179236	-2.54963837221551	-0.039177277179236	0	0	-0.0587659157688541	-2.47284149563962	-0.176297747306562	0	0	0	-0.039177277179236	0	-0.060323593551438	-1.00525127920086	-0.0587659157688541	-0.85633055939683	-0.019588638589618	-0.0979431929480901	-1.6774957023782	-0.333006856023506	-1.35940445159656	-0.295387256626854	-0.022703994154786	-0.039177277179236	-9.01559246666682	-0.430950048971596	-0.254652301665034	-5.8593226454972	-0.250640440901257	0.148920719804024	-2.88080739258187	0.58855566288715	0.05720823798627	22.259237925756	0.80960022591931	0.1351369523754
502	0	0	0.0181983621474067	0	0	0	0	0	0	0	0.0181983621474067	0	0	0.0363967242948135	0	0	0	0	0	0	0	0	0	0	0	0	0	0	0	0	0	0	0	0	0	0	0	0	0	0	0	0	0	0	0	0	0	0	0
503	0	0	0	0	0	0	0	0	0	0	0	0	0	0	0	0	0	0	0	0	0.00488973644320571	0	0	0	0	0	0	0	0	0	0	0	0	0	0	0	0	0	0	0	0	0	0	0	0	0	0	0	0
504	0.00200863713970071	-0.00334492908750334	0	0	0	-0.00167246454375167	0	0	0.00033617259594904	0	0	0	-0.00167246454375167	0	0	0	0	0	0	0	0	0	0	0	0	0	0	0	0	0	0	0	0	0	0	0	0	0	0	0	0	0	0	0	0	0	0	0	0
505	0	0	0	0	0.00011569879992888	0	0	0	-0.000409467712447204	-0.000204733856223602	-0.000614201568670806	-0.000818935424894409	0	0	0	0	-0.00017807011258945	0	0	0	0	0.00011569879992888	-0.000409467712447204	-0.00102366928111801	0	0	0	0	0	0	0	0	-0.000204733856223602	0	-0.000818935424894409	0	0	0	0	0	0	0	0	0	0	0	0	0	0
506	-0.136109976861304	0.0391677594076272	0.206640856643036	-0.251803457193412	0.00514026519230101	0.118169371683188	-0.18374846876276	-0.064579956889114	-0.0068054988430652	-1.0846380438987	-0.037691008247006	-0.022747823640264	0.024557621531039	-0.048970678822068	0.046972398441151	0	0	-0.0068054988430652	0	0	0	0	-0.0136109976861304	0	0	0	0	0	0	-0.0136109976861304	0.0268889486421081	-0.0272219953722608	0.243810335669747	0.258420473546336	0.330949633708985	-0.28849532524996	0.203643436071662	-0.167328532995397	-0.085329500148462	-0.455968422485368	0.055920741905144	-0.251803457193412	-0.142915475704369	0.0728622068928014	-0.034027494215326	-0.0136109976861304	0.0268889486421081	-0.0136109976861304	-0.0272219953722608
507	0	0	0	0	0	0	0	0	0	0	0	0	0	0	0	0	0	0	0	0	0	0	0	0	0	0	0	0	0	0	0	0	0	0	0	0	0	0	0	0	0	0	0	0	0	0	0	0	0
508	0	0	0	0	0	0	0	0	0	0	0	0	0	0	0	0	0	0	0	0	0	0	0	0	0	0	0	0	0	0	0	0	0	0	0	0	0	0	0	0	0	0	0	0	0	0	0	-0.000266628272195471	0
509	0	0	0	0	0	0	0	0	0	0	0	0	0	0	-0.000289724066798781	0	0	0	0	0	0	0	0	-0.000289724066798781	0	0	0	0	0	-0.000579448133597562	0	0	0	2.88992062020199e-05	0	0	0	0	0	0	0	0	0.00266531501359306	0	0	0	0	2.88992062020199e-05	0
510	0	-0.00589448865310934	0	0	0	0	-0.00589448865310934	0	0.0193817230351778	0	0	0	0	0	0	0	0	0	0	0	0	0	0	0	0	0	0	0	0	0	0	0	0	0	0	0	0	0	0	0	0	-0.0117889773062187	0	0	0	0	0	0	0
511	0	0	0	0	0	0	0	0	0	0	0	0	0	0	0	0	0	0	0	0	0	0	0	0	0	0.00512557662737058	0	0	0	0	0	0	0	0	0	0	0	0	0	0	0	-0.00202404566247015	0	0	0	0	0	0.00107748530243029	0
512	0.00122449229488223	0	0	0	0	0	0	0	0	0	0	0	0	0	0	0	0	0	0	0	0	0	-0.000622411804247338	0	0	0	0	0	0	0	0	0	-0.000414941202831559	0	0	0	0	0	0	0	0	0	0	0	0	0	0	0	-0.000207470601415779
513	0	0	0	0	0	0	0	0	0	0	0	0	0	0	0	0	0	0	0	0	0	0	0	0	0	0	0	0	0	0	0	0	0	0	0	0	0	0	0	0	-0.0115707260630605	0	0	0	0	0	0	0	0
514	-0.0149432157800359	0	0	0	0	0	0	0	0	0	0	0	0	0.0719942404607631	0	0	0	0	0	0	0	0	0	0	0	0	0	0	0	0	0	0	0	0	0	0	0	0	0	0	0	0	0	0	0	0	-0.0149432157800359	0	0
515	0	0	0	0	0	0	0	0.0215377988369589	0	0	0	0	0	0	0.0215377988369589	0	0	0	0	0	0	0	0	-0.00392618767177071	0	0	0	0	-0.00392618767177071	0	0	0.0430755976739177	0	0.0215377988369589	0	0	0	0	0	0	0	0	0	0	0	0	0	0	0
516	0	0	0	0	0	0	0	0	0	0.00178208646683537	0	0	0	0	-0.013595371531292	0	0	0	-0.0112703058044064	0	0	0	0	0	0	0	0.0278659809792841	0	0	-0.00151059683681022	-0.00302119367362045	0	0	-0.00522791845716549	0	0	0	0	0	0	0	-0.00096761757675993	0	0	-0.00755298418405112	0	0	0	0
517	-0.00397408894011048	0.0495720449558293	-0.00397408894011048	0.0148508001276385	-0.00397408894011048	0.0102490519626935	0	0	0.00627496302258302	0	0.00230087408247254	-0.0238445336406629	-0.0112946075954969	0.00230087408247254	0	0.00627496302258302	0	0	0	0	0	0	0	0.0581478820608847	0.0393229929931359	0.0409962078507738	0.0274007261728044	0.00230087408247254	0.0204981039253869	0	0.00230087408247254	0	-0.00397408894011048	0	0	0.004601748164945	-0.0278186225807734	-0.00397408894011048	0	0.0204981039253869	0.0512452598134673	-0.0096213927378589	0.0307471558880804	-0.0278186225807734	-0.0158963557604419	-0.00397408894011048	0	0	0
518	0	0	0	0	0	0	0	0	-0.00272329300590274	-0.000680823251475684	0.00717540271947763	-0.00136164650295137	0	0	0	0	-0.00204246975442705	0	0	-0.00049723814911529	0	-0.00136164650295137	0	0	0	0	0	0	0	0	0	0.0129891589360039	0	0.035066122401518	0.0129891589360039	0.0900597041981911	0.00717540271947763	0.00259322506150819	0	0	0	0	0	0	-0.000680823251475684	0	-0.000680823251475684	0	-0.00204246975442705
519	0	0	0	0	0	0	0	0	0	0	0	0	0	0	0	0	0	0	0	0	0	0	0	0	0	0	0	0	0	0	0	0	0	0	0	0	0	0	0	0	0	0	0	0	0	0	0	0	0
520	0.0241372246442727	0	0	0.0113817436831323	0	0.0113817436831323	0	0	0	0	0.126181072333396	0.0113817436831323	0	0.128536701430345	0	0	-0.0200160128102482	0	0	0	-0.0100080064051241	0	0	0	0	0	0	0	0	0	0	0	0	0	0	0	0	0.0355189683274049	0	0	0	0	0	0	0	0.0013737372780082	0	-0.0100080064051241	0
521	0	0	-0.00297176820208024	0	0	0	-0.00297176820208024	0	-0.0324292608282466	0	0	0	0	0	0	0	0	0.00323195759671633	0	0	0	0	0	0	0	0	0	-0.00297176820208024	0	0	0	0	0	0	0	0.00323195759671633	0	0	0	0	0	0	0	0	0	0	0.00323195759671633	0	0
522	0	0	0.00331958556825845	0	0	0	0	0.0219250164437623	0	0	0	0	0	-0.00764292265362275	0	0	0	0	0	0	-0.00764292265362275	0.0219250164437623	0	0	0.0438500328875247	0	0	-0.00764292265362275	0.0219250164437623	-0.00764292265362275	0	0	0	0.0109625082218812	0	0	0	-0.0152858453072455	0	0	0	0	0	0	0.0109625082218812	-0.00764292265362275	0	0.0219250164437623	0
523	-0.0111650756433875	0	-0.00558253782169374	0	-0.00558253782169374	0	0	0	-0.0111650756433875	0	-0.00558253782169374	-0.022330151286775	0	0	0	0	0	0	-0.0390777647518562	0.00648845055800675	-0.0111650756433875	-0.022330151286775	-0.0167476134650812	-0.00558253782169374	0	-0.0111650756433875	0	0	0	-0.0111650756433875	0	0	0	-0.0111650756433875	-0.00558253782169374	-0.0111650756433875	-0.00558253782169374	-0.0167476134650812	0	0	0	-0.00558253782169374	0	0	0	-0.00558253782169374	0	0	0
524	0	0	0	0	0	0	0	0	0	0	-0.0168067226890756	0	0	0	0	0	0	0	0	0	0	0	0	0	0	0	0	0	0	0	0	0	0	0	0	0	0	0	0	0	0	0	0	0	0	0	0	0	0
525	0	0	0	-0.00936504963476306	-0.0374601985390523	0	0	0	0	0.0116699731590617	0.0139748966833604	0	0	0	-0.0187300992695261	0	-0.0280951489042892	-0.00936504963476306	0	0	0	0	0	-0.00936504963476306	0	0	0	0	0	0	0	0	0	-0.00936504963476306	0	0	0	0	0	0	0	0	0	0	0	0	0	0	0
526	0	0	0	0	0	0	0	0	0	0	0	0	0	0	0	0	0	0	0	0	0	0	-0.000731587764926219	0	0	0	0	0	0	0	0	0	0	0	0	0	0	0	0	0	0	0	0	0	0	0	0	0	0
527	-0.0228571428571429	0	-0.00380952380952381	0	0	0	0	0	0	0	0	-0.00761904761904762	0	0	0	0	0	0	-0.00380952380952381	-0.0152380952380952	0	0	0	0	0	0	0	0	0	0	0	0	0	0	0	0	0	0	0	0.00763184003663283	0	0	0	0	0	-0.00761904761904762	0	0	0
528	0	0	0	0	0	0	0	0	0	0	0	0	0	0	-0.00221906621693591	0	0	0	0	0	0	0	0	0	0	0	0	0	0	0	0	0	0	0	0	0	0	0	0	0	0	0	0	0	0	0	0	0	0
529	0	0	0	0.00861623298293986	0	0	0	0	-0.000836540070269366	0	0.00430811649146993	0	0	0	-0.00167308014053873	0	0.00347157642120056	0	0	0	0	0	0	0	0	0	0	0	0	-0.000836540070269366	0	-0.000836540070269366	0	0	-0.000836540070269366	0	0	-0.000836540070269366	0	-0.000836540070269366	0	0	-0.0050192404216162	0	0	0	0	0	0.00886706526318604
530	0	0	0	0	0	0	0	0	0	0	0	0	0	0	0	0	0	0	0	0	0	0	0	0	0	0	0	0	0	0	0	0	0	-0.00552333609500138	0	0	0	0	0	0	0	0	0	0	0	0	0	0	0
531	0	-0.013051422605064	0	0	0	0	0	0	0	0	0	0	0	0	0	0	0	0	0	0	0	0	0	0	0	-0.00435047420168798	0	0	0	0	0	0	-0.00870094840337597	0	0	0	-0.00435047420168798	-0.0174018968067519	0	0	-0.0348037936135039	0	-0.0119883703874031	0	0	0	-0.00870094840337597	0	-0.00870094840337597
532	0	0.000882129814223461	0	0	0	0	0	0.000882129814223461	0	0	-0.000419346992862714	-0.000209673496431357	0	0	0	0	0	0	0	-0.000209673496431357	0	0	0	0	0	-0.000419346992862714	0	0	0	0	0	0	0	0	0	0	0	0	0	0	0	0	0	0	0	0	0	0	0
533	-0.010465724751439	-0.0313971742543171	0	0	0	0	-0.010465724751439	0	0	0.0323101777059774	-0.0466392596556455	-0.010465724751439	0	0	0	0	0	0	0	0	-0.0209314495028781	-0.0418628990057561	0	0	-0.0837257980115123	0	-0.0200184460512178	0	0	0	0	-0.186768382014171	-0.0209314495028781	0.0161550888529887	-0.164222268999559	-0.0313971742543171	0	0.0484652665589661	0	0	0	0	-0.0418628990057561	0	0	0	0	0	0.0218444529545384
534	0	0	0	0	0	0.00379233190488832	0	0	0	0	0	0.00379233190488832	0	-0.00102692599971246	0	0	0	0	0	-0.00102692599971246	0	0	0	0	0	0	-0.00308077799913738	0	0	0	0	0	0.00758466380977663	0	0	0	0	0	0	0	0	0	0	0	0	0	0	0	0
535	0	0	0	0	0	0	0	0	0	0	0	0	0	0	0	0	0	0	0	0	0	0	0	0	0	0	0	0	0	0	0	0	0	0	0	0	0	0	0	0	0	0	0	0	0	0	0	0	0
536	0	0	0	0	0	0	0	0	0	0	0	0	0	0.0090293453724605	0	0	-0.00412643393579269	0	0	0	0	0	0	0	0	0	0	0	0	0	-0.00206321696789634	0	0	0	0	0	0	0	0	0	0	0	0	0	0	0	0	0	0
537	0	0	0	-0.159235668789809	0	-0.0375479984672646	0	-0.0796178343949045	0.0420698359276399	0	0.0420698359276399	0	0	-0.0398089171974522	-0.278662420382166	-0.119426751592357	-0.0398089171974522	-0.276401501651978	-0.0398089171974522	0	0.022609187301877	0.0420698359276399	-0.0398089171974522	0.00452183746037531	0	-0.0398089171974522	0	0	0	0.0841396718552798	0	0	0.385411279539322	0	0	0.095444265506218	0	0.128470426513108	0	0	0	0	0	-0.260575070540664	0	0	-0.145670156408683	0	0
538	0	0	0	0	0	0	0	0	0	0	0	0	0	0	0	0	0	0	0	0	0	0	0	0	0	0	0	0	0	0	0	0	0	0	0	0	0	0	0	0	0	0	0	0	0	0	0	0	0
539	0	0	0	0	0	0	0	0.0144352219415374	0	0	0	-0.00284123326802832	0	0	0	0	0	0	0	0.0144352219415374	0	0	0	0	0	0	-0.00502942211939848	0	0	0	0	0	0	0	0	0	0	0	0	0	0	0	0	0	0	0	0	0	0
540	0	0	0	0	0	0	0	0	0	0	0	0	0	0	0	0	0	0	0	0	0	0	0	0	0	0	0	0	0	0	0	0	0	0	0	0	0	0	0	0	0	-0.00846023688663283	0	0	0	0	0	0	0
541	0	0	0	0	0	0	0	0	0	0	0	0	0	0	0	0	0	0	0	0	0	0	0	0	0	0	0	0	0	0	0	0	0	0	-0.00283342305839685	0	0	0	0	-0.00283342305839685	0	0	0	0	-0.00283342305839685	0	0	0	0
542	0	0	0	0	0	0.00362989582198991	0	0	0	0	0	0.00362989582198991	0	0	0	0	0	0	0	0	0	0	0	0	0	0	0	0	0	0	0	0	0	0	0	0	0	0	0	0	0	0	0	0	0	0	0	0	0
543	0	0	0	0	0	0	0	0	0	0	0	0	0	0	0	0	0	0	0	0	0	0	0	0	0	0	0	0	0	0	0	0	0	0	0	0	0	0	0	0	0	0	0	0	0	0	0	0	0
544	0	0	0	0	-0.000291303144617446	0	0	0	-0.000291303144617446	0	0	0	0	0	0	0	0	0	0	0	0	0	0	0	0	0	0	0	0	0	0	0	0	0	0	0	0	0	0	0	0	0	0	0	0.00234307625056136	0	0	0	0
545	-0.00604448742746615	0	-0.00151098484336968	-0.00302224371373308	0	0	0	0	0	0	0	0	0	0	0	0	0	0	0	0	0	0	-0.00755547227083583	0	0.00453350258409647	0	0	0.00906700516819295	0	0	0.00453350258409647	0	0	0	0	0	0	0	0	0	0	0	0	0	0	0	0	0	0
546	0	0	0	0	0	0	0	0	0	0	0	0	0	0	0	0	0	0	0	0	-0.000965605144744211	0	0	0	0	0	0	0	0	0	0	0	0	-0.000965605144744211	0	0	0	0	0	0	0	0	0	0	0	0	0	0	0
547	0	0	0	0	0	0	0	0	0	0	0	0	0	0	0	0	0	0	0	0	0	0	0	0	0	0	0	0	0	0	0	0	0	0	0	0	0	0	0	0	0	0	0	0	0	0	0	0	0
548	0	0	0	0	0	0	0	0	0	0	0	0	0	0	0	0	0	0	0	0	0	0	0	0	0	0	0	0	0	0	0	0	0	0	0	0	0	0	0	0	0	0	0	0	0	0	0	0	0
549	0	0	0	0	0	0	0	0	0	0	0	0	0	0	0	0	0	0	0	0	0	0	0	0	0	0	-0.000213882011988087	0	0	0	0	0	0	0	0	0	0	0	0	0	0.000206220547788322	0	0	0	0	0	0	0	0
550	0	0	0	0	0	0	0	0	0	0	0	0	0	0	0	0	0	0	0	0	0	0	0	0	0	0	0	0	0	0	0	0	0	0	0	0	0	0	0	0	0	0	0	0	0	0	0	0	0
551	0	0	0	0	0	0	-0.00585240241118979	0	0	0	0	0	0	0	0	0	0	0	0	0	0	0	0	0	0	0	0	0	0	0	0	0	0	0	0	0	0	0	0	0	0	0	0	0	0	0	0	0	0
552	0	0	0	-0.00146993973247097	0	0	0	-0.00146993973247097	0	0	0	0	0	0	0	0	0.0164853280580284	0	-0.00146993973247097	0	0	0	0	0	0	0.0164853280580284	0	0	0.0915622696858153	0	0	0.0150153883255574	0	0	-0.00293987946494194	0	-0.00146993973247097	0	0	0	0	0	0	0	0	0	0	0	0
553	0.00481394117363886	0	0	0	-0.0055755345543754	0	0	-0.0027877672771877	0	0	0	0	0	0	0	0	0	-0.0027877672771877	0	0	0	0	0	0	0	0	0	0	-0.0027877672771877	0.00481394117363886	0	0	0	0	0	0	0	0	0	0	0	0	0	-0.0027877672771877	0	0	0	0	-0.0027877672771877
554	0	0	0.0136892539356605	0	-0.0276701715550636	0.0592228791599479	0.082135523613963	0.027378507871321	-0.0645637336284818	-0.0187384447204517	0	-0.00504919078479121	-0.0047575271010486	-0.0276701715550636	-0.0368935620734182	0	0	-0.0047575271010486	-0.00922339051835455	0	-0.00922339051835455	0	0	0	0	-0.00922339051835455	0	-0.0184467810367091	0	0.027378507871321	0	0.0181551173529665	0	-0.0047575271010486	-0.0276701715550636	0.027378507871321	-0.00922339051835455	0	0.0136892539356605	-0.0184467810367091	0	0.00446586341730595	0	0.0181551173529665	0	-0.0184467810367091	0	0.054757015742642	0.0136892539356605
555	0	0	0	0	0	0	0	0	0	0	0	0	0	0	0	0	0.215362526920316	0	0	0	0	0	0	0	0	0	0	0	0	0	0	0	0	0	0	0	0	0	0	0	0	0	0	0	0	0	0	0	0
556	0	0	0	0	0	0	0	0	0	0	0	0	0	0	0	0	0	0	0	0	0	0	0	0	0	0	0	0	0	0	0	0	0	0	0	0	0	0	0	0	0	0	0	0	0	0	0	0	0
557	0	0	0	0	0	0	0	0	0	0	0	0	0	0	0	0	0	0	0	0	0	0	0	0	0	0	0	0	0	0	0	0	0	0	0	0	0	0	0	0	0	0	0	0	0	0	0	0	0
558	0	0	0	0	0	0.00873362445414847	0	0	0	0	0	0	0	0.00837633981738781	0	0	0	0	0	0	0	0	-0.00909090909090909	0	0	-0.127272727272727	0	-0.00909090909090909	0	0	0.00873362445414847	0	0	0	-0.00944819372766973	0	-0.0017864231838031	0	0	0	-0.00909090909090909	-0.0479555379118697	0	0	-0.00464470027788801	0.00873362445414847	0	0	0
559	0	0	-0.0106674252391281	0.0239320330262056	0	0	0	0	0	0	0	0	0	0	0	0	0	0	0	0	0	0	0	0	0	0	0	0	0	0	0	0	0	0	0	0	0	0	0	0	0	0	0	0	0	0	0	0	0
560	0	0	0	0	0	0	0	0	0	0	0	0	0	0	0	0	0	0	0	0	0	0	0	0	0	0	0	0	0	0	0	0	0	0	0	0	0	0	0	0	-0.000184552239356872	0	0	0	0	0	0	-0.000184552239356872	0
561	0	0	0	0	0	0	0	0	0	0	0	0	0	0	0	0	0	0	0.288392213410238	0	0	-0.0190367409099562	0	0	0	0	0	0	0	0	0	0	-0.0190367409099562	0	0	0	0	0	0	0	0	0	0	0	-0.0951837045497811	-0.0380734818199124	0	-0.0571102227298686	0
562	0	0.0150315456816278	0.00404884731037433	-0.0317350412555536	-0.00577000750100975	-0.0224735030749355	-0.0103761714421501	-0.0144250187525244	-0.00577000750100975	-0.00288500375050488	0	-0.00749116769164519	0	-0.0115400150020195	0	0	-0.00288500375050488	0	-0.00577000750100975	0	-0.00288500375050488	0	-0.00288500375050488	0	0	0	0	0	0	-0.00288500375050488	0	-0.00288500375050488	0	0.00693385106087921	-0.00288500375050488	0	0	0	0	0	0	0	0	0	0	0	0	0	0
563	0	0	0	0	0	0	0	0	0	0	0	0	0	0	0	0	0	0	0	0	0	0	0	0	0	0	0	0	0	0	0	0	0	0	0	0	0	0	0	0	0	0	0	0	0	0	0	0	0
564	0	0	0	0	0	0	0	0	0	0	0	0	0	0	-0.00308908933646361	0	0	0	0	0	0	0	0	0	0	0	0	0	0	0	0	0	0	0	0	0	0	0	0	0	0	0	0	0	0	0	0	0	0
565	0	0	0	0	0	0	0	0	0	0	0	0	0	0	0	0	0	0	0	0	0	0	0	0	0	0	0	0	0	0	0	0	0	0	0	0	0	0	0	0	0	0	0	0	0	0	0	0	0
566	0.0441025515020052	0.00578536303153023	-0.00111795548301267	0	0.0266909041916258	-0.00111795548301267	0.00578536303153023	0.0115707260630605	0.0278088596746384	0	0.0315538973566103	-0.00111795548301267	0.00262708219895917	0.159223055283209	0.117216387346551	0.0404975412207116	0.0462829042522418	0	0	0.178619469727359	0.00466740754851756	0	0	0.0115707260630605	0	0	0	0	0	0.0578536303153023	0	0	0	0	0.0115707260630605	0	0	0	0	0	0	0	0	0	0	0	0	0	0
567	-0.0203873598369011	0	0	0.0334896182183523	0.113571113036508	0	0	0	0	0.0669792364367046	0	0	0	0	-0.0203873598369011	0	0.160162989636312	0	0.0334896182183523	0	0	0	0	0	0	0	0	0	0	0	0	0	0	0	0	0	0.0334896182183523	0	0	0	0.133958472873409	0	0	0	0	0	0	0	0
568	0	0	0	0	0	0	0	0	0	0.0170010200612037	0	0.00850051003060184	0	0	0	0	0	0	0	0	0	0	0	0	0	0	0	0	-0.0126915429495307	0	0	0	0	0	0	-0.00529801324503311	0	0	0	0.0149055036017393	0	0	0	0.0170010200612037	0	0	0	0	0
569	0.060790273556231	0	0	0	0	0	0	0	0.060790273556231	-0.0195026816187226	0	0.0303951367781155	0	0	-0.0292540224280839	0	-0.0195026816187226	0	0	0	-0.0195026816187226	0	0	0	0	0	0	0	0	0	0	0	0	0	-0.0195026816187226	0.0303951367781155	0	0	-0.0195026816187226	0	0	0	0	-0.00975134080936129	0	0	0	0	0
570	0	0	0	0	0	0	0	0	0	0	0	0	0	0	0	0	0	0	0	0	0	0	0	0	0	0	0	0	0	0	0	0	0	0	0	0	0	0	0	0	0	0	0	0	0	0	0	0	0
571	0	0	0	0	0	0	0	0	0	0	0	0	0	0	0	0	0	0	0	0	0	0	0	0	0	0	0	0	0	0	0	0	0	0	0	0	0	0	0	0	0	0	0	0	0	0	0	0	0
572	0.079921395794248	-0.0648508430609598	-0.0382103777962109	0	-0.0648508430609598	0	0.0266404652647493	0	0	0.118131773590458	0	0	-0.12970168612192	-0.0648508430609598	0.0914913083257091	-0.194552529182879	0.548947849954254	-0.194552529182879	0	0	0.365965233302836	0	0.0914913083257091	0	-0.259403372243839	0	-0.0648508430609598	0	0.0914913083257091	0	0	0	0	0	0	0	0	0	0	0	-0.194552529182879	0	0	0	0	0	0	0	0
573	0	0	-0.00789265982636148	0	0	-0.015785319652723	0	0	0	0	0	0	0	0	0	-0.00789265982636148	0	0	0	0	0	0	0	0	0	0	0	0	0	0	0	0	0	0	0	0	0	0	0	0	0	0	0	0	0	0.00993900921786102	0	-0.0384401244360576	0
574	0	0	0	0.00539679969777922	0.00065783338763997	0	0	0	0	0	0.00809519954666883	0	-0.00204056646124964	0	0.00065783338763997	0	0	-0.00408113292249929	0	0	0	-0.00204056646124964	0	0.00269839984888961	0.00809519954666883	0	-0.00204056646124964	0.00269839984888961	0	0.00539679969777922	0	0	0	0	-0.00408113292249929	0	0	0	0	0.00269839984888961	0	0	0	0	0	0	0.00269839984888961	0	0
575	0	0	0	0	0	0	0	0	0	0	0.00132110867439956	0	0	0	0	0	0	0	0	0	0	0	0	0	0	0	0	0	0	0	0	0	0	0.00132110867439956	0	-0.0012480343459052	0	0	0	0	0.00396332602319867	0	-0.0024960686918104	0	0	0	-0.006240171729526	0	0
576	0	0.000584802161428789	0	0.00116960432285758	0	0	0.000584802161428789	0	0	0	0.00116960432285758	0.00233677381591139	0.000584802161428789	0	0	0.00643038894591291	0	-0.000587236991232552	0.00233433898610763	0	0	0	0	0	0.000584802161428789	-0.000587236991232552	0.00467841729143031	0.00175440648428637	0	0	0	0.00175440648428637	0.00233677381591139	0.0116814342497532	0.00583828229507283	0.000584802161428789	0	0	0	0.0116351724834817	-0.000587236991232552	0	0	-0.0035794230328819	0.000584802161428789	0	-0.0135186249473675	0.00116960432285758	-0.00530461155952307
577	0	0	0	0	0	0	0	0	0	0	0	0	0	0	0	0.00231417198926224	0	0	0	0	0	0.00021468793746797	0	0	0	0	0	0	0	0	0	0	0	0	0	0.00231417198926224	0	0	0	0.00178930097631367	0	0	0	0	0.0012644299633651	0	0	0.00073955895041654	0
578	-0.166512491497258	-0.00343088482519642	-0.0171544241259821	0	0	-0.0205853089511785	-0.0619507751762402	-0.00343088482519642	0	-0.00686176965039284	0	-0.161599205073911	-0.0619507751762402	-0.0486169325208639	-0.00362573314790109	0	0.00304118817978708	-0.00401542979331046	-0.00343088482519642	0	0.00304118817978708	-0.0171544241259821	0	0.0164934941743804	0.00323603650249175	-0.00343088482519642	0	0	0.0014824015981497	0	0	-0.00343088482519642	0	0	0	0	0.00304118817978708	-0.0102926544755893	0	0	-0.00686176965039284	-0.00343088482519642	0	-0.00038969664540934	0.00970810950747524	0.00323603650249175	0	-0.00686176965039284	0
579	0	0	0	0	0	0	0	0	0	0	0	0	0	0	0	0	0	0	0	0	0	0	0.00125429596367559	0	0	0	0	0	-0.00102293401377983	0	0	0	0	0	0	0	0.00148565791357135	0	0	0	0	-0.00341584496618313	0	0	0	0	0	0	0
580	0	0	0	0	0	0	0	0	0	0	0	0	0	0	0	0	0	0	0	0	0	0	0	0	0	0	0	0	0	0	0	0	0	0	0	0	0	0	0	0	0	0	0	0	-0.093841642228739	0	0	0	0
581	-0.0249564160322791	0	0	0	1.62980732015924	0.0604984662240681	0	0	0.10320917237441	0	0	0	0	0	0	0	0.0284738041002278	0	0	0.0106525740708375	0	0	0	0	0	0	0	0	0.0035508580236125	0	0	-0.0035843279792764	0	0	0	0	0.0391263781710653	0.0142369020501139	0.0248894761209514	0.0142369020501139	0	0	0	0	0	0	0	0.0747018983185181	0
582	0	0	0	0	0	0	0	0	0	0	0	0	0	0	0	0	0	0	0	0	0	0	0	0	0	-0.000579119275405963	0	0	0	0	0	0	0	0	0	0	0	0	0	0	0	0	0	0	0	0	0	0	0
583	0	0	0	0	0	0	0	0	0	0	0	0	0	0	0	0	0	0	0	0	0	0	0	0	0	0	0	0	0	0	0	0	0	0	0	0	0	0	0	0	0	0	0	0	0	0	0	0	0
584	0	0	0	0	0	0	0	0	0	0	0	0	0	0	0	0	0	0	0	0	0	0	0	0	0	0	0	0	0	0	0	0	0	0	0	0	0	0	0	0	0	0	0	0	0	0	0	0	0
585	0	0	0	0	0	0	0	0	0	0	0	0	0	0	0	0	0	0	0	0	0	0	0	0	0	0	0	0	0	0	0	0	0	0	0	0	0	0	0	0	0	0	0	0	0	0	0	0	0
586	0	0	0	0	0	0	0	0	0	0	0	0	0	-0.0241390408754425	0	0	0	0	0	0	0	0.00337439310547525	0	0	0	0	0	0	0	0	-0.00804634695848085	0	0	0	0	0	0	0	0	0	0	0	0	0	0	0	0	0	0
587	0	0	0	0	0	0	0	0	0	0	0	0	0	0	0	0	0	0	0	0	0	0	0	0	0	0	0	0	0	0	0	0	0	0	0	0	0	0	0	0	0	0	0	0	0	0	0	0	0
588	0	0	0	0	0	0	0	0	0	0	0	0	-0.0153539075694764	0	0	0	0	0	0	0	0	0	0	0	0	0	0	0	0	0	0	0	0	0	0	0	0	0	0	0	0	0	0	0	0	0	0	0	0
589	0	0	0	0	0	0	0	0	0	0	0	0	0	0	0	0	0	0	0	0	0	0	0	0	0	0	0	0	0	0	0	0	0	0	0	0	0	0	0	0	0	0	0	0	0	0	0	0	0
590	0	0	0.00469902730134862	0	0	0	0	0	0.00469902730134862	-0.00244045294806716	0	0	0	0	0	0	0	0	0	0	0.0116566289559787	0	0	0	0	0	0.00469902730134862	0	0	0	0	0	0	0	0	0	0	0	0	0	0	0	0	0	0	0	0	0	0
591	0	0	-0.0105162492803217	0	0	0.201480667080854	0.110795591104866	0.0948880337682304	0.00383141762452107	0	0.00383141762452107	0.0121813130475293	0	0.0180739111939487	-0.00628871490110996	0.00383141762452107	0.696718411224854	-0.00177023710262279	0	0	0	0.0557010272651933	0	0	0	0.00383141762452107	0	0.00068706017396609	0	0	0.00206118052189826	0	0	0	0	-0.133251363187381	-0.00943307235166494	-0.0388154663353165	0.00383141762452107	0	-0.00628871490110996	0	0	0	-0.0808804634566029	0	-0.39496924493135	-0.0129735465569105	-0.00314435745055498
592	0	-0.0115101289134438	0.00425020733315266	-0.0168218689432711	0	0	0	-0.00230202578268877	0	-0.00230202578268877	0	0	-0.00460405156537753	0	-0.0274453490029256	0	-0.00230202578268877	0.0061983888836166	-0.0322283609576427	-0.00230202578268877	0	0	-0.00230202578268877	-0.0533004372340665	-0.00230202578268877	-0.0115101289134438	0.0655957089945902	-0.007613765812516	0	0	0	0	-0.0922559151504356	-0.00230202578268877	-0.0069060773480663	-0.00725992158029121	0	0	0	0	0	0	-0.0102696358274297	0	0	-0.00460405156537753	0	-0.294301379405483	-0.0138121546961326
593	0	0	0	0	0	0	0	0	0	0	0	0	0	0	0	0	0	0	0	0	0	0	0	0	0	0	0	0	0	0	0	0	0	0	0	0	0	0	0	0	0	0	0	0	0	0	-0.00281040975774268	0	0
594	0	0	0	0	0	0	0	0	0	0	0	0	0	0	0	-0.000470871866347729	0	0	0	0	0	0	0	0	0	-0.000470871866347729	0	0	0	0	0	0	0	0	0	0	0	0	-0.000470871866347729	0	0	0	0	0	0	0	0	0	0
595	0	0	0	0	0	0	0	0	0	0	0	0	0	0	0	0	0	0	0	0	-0.00113893919203654	0	0	0	0	0	0	0	0	0	0	-0.00358512503118039	0	0	-0.00341681757610961	0	0	0	0	0	-0.0014755541021781	-0.0198668886298335	0.00552638850511191	-0.00113893919203654	0	0	-0.00472406422321689	0	0
596	0	0	-0.0360880548538434	0	0	0	-0.0721761097076868	-0.0360880548538434	0	0	0	0	0	0	0	0	0	0	0	0	0	0	0	-0.0360880548538434	0	0	0	0	0	0	0	0	0	0	0	0	0	0	0	0	0	0	0	0	0	0	-0.0360880548538434	0	0
597	0	0	0	0	0	0	0	0	0	0	0	0	0	0.0192381685263563	0	0	0	0	0	0	0	0	0	0	0	0	0	0	0	0	0	0	0	0	0	0	0	0	0	0	0	0	0	0	0	0	0	0	0
598	0	0	0	0	0	0	0	0	0	0	0	0	0	0	0.0823723228995058	0	0	0.0411861614497529	0	0	0	0	0	0	0	0	0	0	0	0	0	0	0	0	0	0	0	0	0	0	0	0	0	0	0	0	0	0	0
599	0	0	0	0	0	0	0	0	0	0	0	0	0	0	0	0	0	0	0	0	0	0	0	0	0	0	0	0	0	0	0	0	0	0	0	0	0	0	0	0	0	0	0	0	0	0	0	0	0
600	0	0	0	0	0	0	0	0	0	0	0	0	0	0	0	0	0	0	0	0	0	0	0	0	0	0	0	0	0	0	0	0	0	0	0	0	0	0	0	0	0	0	0	0	0	0	0	0	0
601	0	0	-0.0023146540749485	0	0	0	0	-0.0023146540749485	0	0	0	0	0	0	0	0	0	0	0	0	0	0	0	0	0	0	0	0	0	0	0	0	0	0	0	0	0	0	0	0	0	0	0	0	0	0	0	0	0
602	-0.048532446771121	0.184107571172544	-0.025261946972539	-0.42593653154653	-0.254622383965616	0.598538812904075	-0.125736381549659	0.211555905445476	0.107931850002059	-0.237781085983923	0.21046271179528	0.349057496978715	0.066726858571589	0.033942516131964	0.17240734123111	0.041269971472615	-0.045317845862677	-0.00951384264104272	0	0	-0.0285415279231282	0.074054313912238	-0.279051057456538	-0.29171452096388	-0.174398788405068	-0.021084112498189	0.329964831654485	-0.07077473296165	-0.092952039110035	-0.0190276852820854	0	-0.0190276852820854	-0.0475692132052136	0.723182000803536	0.115324285384853	-0.15633433668889	-0.059074503020215	0.645014832459086	0.0116352498992904	-0.0190276852820854	0	0	-0.00951384264104272	0	-0.0285415279231282	0.079325342036786	-0.0835031765111364	-0.001028213608051	-0.199790695461897
603	0	0	0	0	0	0	0	0	0	0	0	0	0	0	0	0	0	0	0	0	0	0	0	0	0	0	0	0	0	0	0	0	0	0	0	0	0	0	0	0	0	0	0	0	0	0	0	0	0
604	0	0	0	0	0	0	0	0	0	0	0	0	0	0	0	0	0	0	0	0	0	0	0	0	0	0	0	0	0	0	0	0	0	0	0	0	0	0	0	0	0	0	0	0	0	0	0	0	0
605	0	0	0	0	0	0	0	0	0	0	0	0	0	0	0	0	0	0	0	0	0	0	0	0	0	0	0	0	0	0	0	0	0	0	0	0	0	0	0	0	0	0	0	0	0	0	0	0	0
606	0.0495785820525533	0	0	0	0	0	0	0	0.0495785820525533	0	0.0495785820525533	0	0	0	0	0	0	0	0	0	0	0	0	0	0	0	0	0	0.0991571641051066	0	0	0	0	0	0	0	0	0.0495785820525533	0	0	0	0	0	0	0	0	0.29747149231532	0	0
607	-0.067029925618405	-0.0389206019719772	-0.0908147379346134	-0.0259470679813181	-0.0518941359626362	-0.0529752637951907	-0.0908147379346134	-0.169737069711123	-0.311364815775817	0.0886524822695039	-0.0659487977858497	-0.0908147379346134	-0.014054661823214	-0.0259470679813181	0.0508130081300813	-0.194603009859886	-0.0648676699532953	-0.103788271925272	0.071354436948625	-0.262714063310846	-0.0756789482788449	0.00756789482788503	0.219468950008649	0.71570662515135	0.158925791385574	1.52655249956755	1.62817851582771	2.3838868707836	0.98382632762498	2.73201003286628	0.203252032520325	-0.05729977512541	-0.242172634492303	0.169737069711122	-0.201089776855215	-0.484345268984605	-0.120005189413596	-0.129735339906591	-0.105950527590382	-0.14270887389725	-0.092976993599723	0.022703684483653	-0.002162255665109	-0.0908147379346134	0.0508130081300813	-0.0648676699532953	0.0497318802975268	-0.0778412039439543	0
608	0	0	0	0	0	0	0	0	0	0	0	0	0	0	0	0	0	0	0	0	0	0	0	0	0	0	0	0	0	0	0	0	0	0	0	0	0	0	0	0	0	0	0	0	0	0	0	0	0
609	0	0.0026786104753714	-0.0276243093922652	-0.0138121546961326	-0.0276243093922652	-0.0138121546961326	0	-0.0276243093922652	0	0	0	0	-0.0276243093922652	0	-0.0138121546961326	0	-0.0138121546961326	0	0	0	0.016490765171504	0	0.0329815303430079	-0.0828729281767956	-0.0138121546961326	0.016490765171504	0.0329815303430079	0	0	0	0	0.016490765171504	0	-0.0138121546961326	0	0	0	0.0824538258575198	0	0	0	-0.0138121546961326	0	0	0	0	0	0	0
610	0	0	0	0	0	0	0	0	0	-0.00181633246149375	0	0	0	-0.00181633246149375	0	0	0	0	0	0	0	0	0	0	0	0	0	0	0	0	0	0	0	0	0	0.0184908757584506	-0.00181633246149375	0	0	-0.00181633246149375	0	0.0343018970106426	0	0	0	-0.00181633246149375	0	0	0.0402868652963756
611	0	0	0	0	0	0	0	0	0	0	0	0	0	0	0	0	0	0	0	0	0	0	0	0	0	0	0	0	0	0	0	0	0	0	0	0	0	0	0	0	0	0	0	0	0	0	0	0	0
612	0.123986275733001	0.056924516531503	0.371958827199002	0.220679975046787	-0.109170305676856	-0.027292576419214	0.029631940112289	0.535714285714286	-0.027292576419214	0	0.123986275733001	0.29008109794136	-0.218340611353712	-0.27292576419214	0.042108546475359	0.332189644416718	0.123986275733001	0	0.371958827199002	-0.13646288209607	-0.325171553337492	-0.337648159700561	-0.0545851528384279	-0.0818777292576419	0.123986275733001	-0.109170305676856	0.220679975046787	-0.109170305676856	-0.067061759201497	1.41609482220836	-0.027292576419214	0.029631940112289	-0.163755458515284	-0.354803493449782	-0.188708671241423	0.619931378665003	-0.121646912039925	1.11821584529008	0.180910792264504	0.042108546475359	-0.354803493449782	-0.012476606363069	-0.027292576419214	-0.13646288209607	0.014815970056145	-0.0818777292576419	0.399251403618216	0.123986275733001	-0.27292576419214
613	-0.0290951411114344	0	0.049055678194751	0	0	0.0245278390973755	0	0	0	0.049055678194751	-0.0872854233343032	-0.0091346040281178	-0.0290951411114344	0.0245278390973755	0.0735835172921266	0	0	0	0	-0.0091346040281178	0	0	0.0981113563895021	0	0.0245278390973755	-0.0290951411114344	0	0	0.0245278390973755	0	0	-0.0290951411114344	0	0	0	0	0	0	0	-0.0290951411114344	0	0.049055678194751	0	0.049055678194751	0	0	-0.0290951411114344	0	0
614	0	0	0	0	0	0	0	0	0	0	0	0	0	0	0	0	0	0	0	0	0	0	0	0	0	0	0	0	0	0	0	0	0	0	0	0	0	0	0	0	0	0	0	0.0218555504719839	0	0	0	0	0
615	0	0	0	0	0	0	0	0	0	0	0	0	0	-0.0353516644565657	0.00821152898669732	0	0	0	0	0	0	-0.00575274693666226	0	0	0	0	0	0	0	0	0	0	0	-0.00329396488662718	0	0	0	0	0	0	0	0	0	0	0	0	-0.00575274693666226	0	0
616	0	0	0	0	0	0	0	0	0	0	0	0	0	0	0	0	0	0	0	0	0	0	0	0	0	0	0	0	0	0	0	0	0	0	0	0	0	0	0	0	0	0	0	0	0	0	0	0	0
617	0	0	0	0	0	0	0	0	0	0	0	0	0	0	0	0	0	0	0	0	0	0	0	0	0	0	0	0	0	0	0	0	0	0	0	0	0	0	-0.109529025191676	0	0	0	0	0	0	0	0	0	0
618	0	0	0	0	0	0	0	0	0	0	0	0	0	0	0	0	0	0	0	-0.000224082605811806	0	0	0	0	0	0	0	0	0	0	0	0	0	0	0	0	0	0	0	0	0	0	0	0	0	0	0	0	0
619	0	0	0	0	0	0	0	0	0	0	0	0	0	0	0	0	0	0	0	0	0	0	0	0	0	0	0	0	0	0	0	0	0	0	0	0	0	0	0	0	0	0	0	0	0	0	0	0	0
620	0	0	0	0	0	0	0	0	0	-0.0568343279340722	-0.0284171639670361	-0.037866220951149	0.154284602396681	0.027077297685691	0.105559465165376	0.223317712892253	0.211118930330753	0.104219598884032	-0.170502983802217	-0.185381498926407	0	-0.0432956790912263	0.105559465165376	0	-0.0284171639670361	0	0	0	0.0067693244214227	0	0	-0.0284171639670361	0	0	0.0703729767769177	0.0067693244214227	0	0.0067693244214227	0.105559465165376	-0.0284171639670361	0	0	0	-0.0500650035126495	0	0	0	0	0.0703729767769177
621	0	0	0	0	0	0	0	0	0	0	0	0	0	0	0	0	0	0	0	0	0	0	0	0	0	0	0	0	0	0	0	0	0	0	0	0	0	0	0	0	0	0	0	0	0	0	0	0	0
622	0	0	0	0	0	0	0	0	0	0	0	0	0.0120948234155781	0	0	0	0	0	0	0	0	0	0	0	0	0	0	0	0	0	0	0	0	0	0	0	0	0	0	0	0	0	0	0	0	0	0	0	0
623	0	0	0	0	0	0	0	0	0	0	0	0	0	0	0	0	0	0	0	0	-0.00809978940547546	0	0	-0.00809978940547546	0	0	0	0	0	0	0	-0.0161995788109509	0	0	0	0	0	-0.0323991576219018	0	0	0	0	0	0	-0.0161995788109509	0	0	0	0
624	0	0	0	0	0	0	0	0	0	0	0	0	0	0	0	0	0	0	0	0	0	0	0	0	0	0	0	0	0	0	0	0	0	0	0	0	0	0	0	0	0	0	0	0	0	0	0	0	0
625	0	0	0	0	0	0	0	0	-0.0101739749720216	0	-0.0101739749720216	0	0	0	0	0	0	0	0	0	0	0	0	0	0	0	-0.00508698748601078	0	0	0	0	0	0	0	0	0	0	0	0	0	0	0	0	0	0.00342747463668769	0	0.00342747463668769	0	0
626	0	0	0	0	0	0	0	0.00205229241062267	0	0	-0.0149186931224825	0	-0.00994579541498831	0	0.00205229241062267	0	-0.00497289770749416	0	-0.00994579541498831	-0.00497289770749416	0	0	0	0	0	0	0	0	0	0	0	0.00410458482124533	0	0	0	0	0	0	0	0	0	0	0	0	0	0	0	0	0
627	0	0	0	0	0	0	0	0	0	0	0	0	0	0	0	0	0	0	0	0	0	0	0	0	0	0	0	0	0	0	0	0	0	0	0	0	0	0	0	0	0	0	0	0	0	0	0	0	0
628	0	0	0	0	0	0	0	0	0	0	0	0	0	0	0	0	0	0	0	0	0	0	0	0	0	0	0	0	0	0	0	0	0	0	0	0	0	0	0	0	0	0	0	0	0	0	0	0	0
629	0	-0.0053682641341415	0	0	0	0	0	0	0	0.0270599377621431	0	0	0	0	0	0	0	0	0	0	0	0	0	0	0	0	0	0	0	0	0	0	0	0	0	0	0	0	-0.00944911650760654	0	0	0	0	0	0	-0.0283473495228196	0	0	0
630	0	0	0	0	0	0	0	0	0	0	0	0	0	0	0	0	0	0	0	0	0	0	0	0	0	0	0	0	0	0	0	0	0	0	0	0	0	0	0	0	0	0	0	0	0	0	0	0	0
631	-0.00305029943772814	-0.00582421833979785	0	-0.00203353295848542	-0.00101676647924271	0.00129314701490114	0	0	0	-0.00101676647924271	0	0	0	-0.00101676647924271	0.00332667997338656	0	0.00665335994677312	-0.0132179642301553	0	0.00027638053565842	0	0	0	0.00129314701490114	0	0	0.00665335994677312	-0.00101676647924271	0	-0.00101676647924271	0	0	-0.00101676647924271	-0.00203353295848542	-0.00406706591697085	0	0	0	0	0	0	-0.00101676647924271	0	0.00665335994677312	0	0	0.00665335994677312	0	-0.00305029943772814
632	0	0	0	0	0	0	0	0	0	0	0	0	0	0	0.0254000508001016	0	0	0	0	0	0	0	0	0	0	0	0	0	-0.0508130081300813	0	0	0	0	0	0	0	0	0	0	0	0	0	0	0	0	0.0254000508001016	0	0	0
633	-0.006385367855258	-0.0466157001678165	-0.0186462800671266	-0.0530010680230745	-0.0034475956769528	-0.0093231400335633	0.0024279486796578	0	0.0058755443566105	-0.0343547879559479	0	0.0367827366356057	-0.0372925601342532	-0.006385367855258	-0.0093231400335633	0.0245218244237371	-0.0093231400335633	-0.0559388402013798	0.0122609122118686	0.0245218244237371	0.0029377721783053	0.0245218244237371	-0.0186462800671266	-0.0530010680230745	-0.0279694201006899	0.0029377721783053	-0.093231400335633	0.0735654732712114	0	0.0181364565684791	0.0029377721783053	-0.0279694201006899	0	0.0029377721783053	0	0.0274595966020424	0	0.0490436488474743	-0.006385367855258	-0.0466157001678165	-0.0186462800671266	0.0122609122118686	-0.0186462800671266	0.0122609122118686	-0.0186462800671266	0	0	0	0.0122609122118686
634	0	0	0	0.0438837081733406	0	0	0	0	0	0	0	0	0	0	0	0	0	0.00264531118952371	0	0	0	0	0	0	0	0	0	0	0	0	0	0	0	0	0	-0.00505832245794005	0	0	0	0	0	0	0.00529062237904742	0	0	0	0.0061449045065025	0.00062198220634769	0
635	0	0	0	0	0	0	0	0	0	0	0	0	0	0	0	0	0	0	0	0	0	0	0	0	0	0	0	0	0	0	0	0	0	0	0	0	0	0	0	0	0	0	0	0	0	0	0	0	0
636	0	0	0	0	0	0	0	0	0	0	0	0	0	0	0	0	0	0	0	0	0	0	0	0	0	0	0	0	0	0	0	0	0	0	0	0	0	0	0	0	0	0	0	0	0	0	0	0	0
637	0	0	0	0	0	0	0	0	0	0	0	0	0	0	0	0	0	0	0	0	0	0.00746491489997014	0	0	0	0	0	-0.00265005962634159	0	0	0	0	0	0	0	0	0	0	0	0	0	0	0	0	0	0	0	0	0
638	0	0	0	0	0	0	0	0	0	0	0	0	0	0	0	0	0	0	0	0	0	0	0	0	0	0	0	0	0	0	0	0	0	0.0301568154402895	0	0	0	0	0	0	0	0	0	0	0	0	0	0	0
639	0	0	0	0	0	0	-0.00954608371915422	0	-0.00477304185957711	0	0	0	0	-0.00954608371915422	0	-0.0105742798744242	-0.00477304185957711	-0.040240727187157	0	0	0	-0.00954608371915422	0	0.0170357751277683	0	0	0	0	0	0	0	0	0	0	0	0	-0.00477304185957711	-0.0238652092978855	-0.0150550034122774	0.00748969140861408	0	0	0.0149793828172282	0	0	0	-0.0972249111803583	0	0
640	-0.00982994200334218	-0.00989902505109631	-0.00982994200334218	-0.0196598840066844	-0.0002072491432622	0.00976085895558809	-0.00982994200334218	0	0	0	0	-0.00982994200334218	-0.0294898260100265	0	0.00976085895558809	0	0	0	0	-0.0196598840066844	0	-0.00982994200334218	0	0	0	-0.0196598840066844	0	0	0	0	-0.00982994200334218	0.00976085895558809	0	0	-0.0196598840066844	0	0	0	0	0	0	0	0	0	0	0	0	0	0
641	0	0	0	0	0	0	0	0	0	0	0	0	0	0	0	0	0	0	0	0	0	0	0	0	0	0	0	0	0	0	0	0	0	0	0	0	0	0	0	0	0	0	0	0	0	0	0	0	0
642	0.0310655483069276	0	0	0.0310655483069276	0	0.0310655483069276	0	-0.00888967908258512	0	0	-0.0266690372477554	0	0	-0.00888967908258512	0.0621310966138552	0.0310655483069276	0	0.0310655483069276	0.12426219322771	-0.00888967908258512	0.0310655483069276	0.0621310966138552	0.0310655483069276	0.0621310966138552	0	0	0	0	0	0	0	0	0	0.0221758692243425	0	0.0310655483069276	0	0.0931966449207828	0	0	0	0.0132861901417574	-0.0444483954129256	0	0	0.10648283506254	-0.00888967908258512	0	0
643	0	0	0	0	0	0	0	0	0	0	0	0	0	0	0	0	0	0	0	0	0	0	0	0	0	0	0	0	0	0	0	0	0	0	-0.00602954476936991	0	0	0	0	0.0067001675041876	0	0	0	0	0	0	0	-0.00602954476936991	0
644	0	0	0	0	0	0	0	0	0	0	0	0	0	0	0	0	0	0	0	0	0	0	0	0	0	0	0	0	0	0	0	0	0	0	0	0	0	0	0	0	0	0	0	0	0	0	0	0	0
645	0	0	0	0	0	0	0	0	0	0	0	0	0	0	0	0	0	0	0	0	0	0	0	0	0	0	0	0	0	0	0	0	0	0	0	0	0	0	0.0052932458183358	0	0	0	0	0	0	0	0	0	0
646	0	0	0	0	0	0	0	0	0	0	0	0	0	-0.00435938794193295	0	0	0	0	0	0	0	0	0	0	0	0	-0.00435938794193295	0.0139889487305029	0	0	0	0	-0.00435938794193295	0	0	0	0	0	0	0	0.0139889487305029	0	0.00699447436525145	0	0	0	0	0	0
647	0	0	0	0	0	0	0	0	0	0	0	0	0	0	0	0	0	0	0	0	0	0	0	0	0	0	0	0	0	0	0	0	0	0	0	0	0	0	0	0	0	0	0	0	0	0	0	0	0
648	0	0	0	0	0	-0.00174425703371649	0	0	0	0	0	0	0	0	0	0	0	0	0	-0.00174425703371649	0	0	0.00249700359568518	0	0	0	0	0	0	0	0	0	0	0	0	0	0	0	0	0	0	0	0	0	0	0	0	0	0
649	0	0	0	0	0	0	0	0	0	0	0	0	0	0	0	0	0	0	0	0	0	-0.0149009089554463	-0.00745045447772314	0	0	0	0	0	0	0	0	0	0	0	0	0	0	0	0	0	0	0	0	0	0	0	0	0	0
650	0	0	0	0	0	0	0	0	0	0	0	0	0	0	0	0	0	0	0	0	0	0	0	0	0	0	0	0	0	0	0	0	0	0	0	0	0	0	0	0	0	0	0	0	0	0	0	0	0
651	0	0.00827247212789377	0	0	0	0	0	-0.0286861732644865	0.0154440154440154	0	-0.00717154331612163	0	-0.0143430866322433	0	0	-0.00717154331612163	0	-0.00717154331612163	-0.0143430866322433	0	0.0463320463320463	0	-0.00717154331612163	-0.034756787768836	0	0	0.0011009288117721	0	0	0.0011009288117721	0	0	0	-0.00717154331612163	0	0.031988959699803	0	-0.0143430866322433	-0.0215146299483649	0.0308880308880309	0.0154440154440154	0	0.0154440154440154	-0.0143430866322433	0.0308880308880309	-0.00717154331612163	-0.0143430866322433	0.00827247212789377	0
652	-0.545986128549102	-0.329566727319237	-0.24902806740661	-0.747581354441513	-0.0879507475813544	-0.0182816430609752	-0.0879507475813544	0	-0.538574040880375	-1.31826690927695	0.202092378114093	-0.186771050554957	0.0074120876687267	-0.380954188778641	-1.53122884278329	0.0513874614594039	-0.90913322866019	-0.567228087111913	-0.186771050554957	0	1.75361407067335	-0.0622570168516524	0	0.0770811921891059	-0.131926121372032	0	0	0.282631038026721	0	-0.0439753737906772	0.025693730729702	-0.241615979737883	0.025693730729702	0	0.0587995491281308	0.025693730729702	0	0	0.0513874614594039	0.286585657971926	0.0770811921891059	0	0.088447899803037	0	0	-0.0439753737906772	0	0	0
653	0	0.00298347156751596	0	0	0	0	0	0	0	0	0	0	0	0	0	0	0	0	-0.00135924045643295	0	0	0	0	0	0	0	0	0	0	0	0	0	0	0	0	-0.000679620228216473	0	0	0	0	0	0	0	0	0	0	0	0	0
654	-0.065415845222676	-0.195192683062852	0.059801452166435	-0.266185462087324	-0.152122032301804	-0.078604499527728	-0.124727330340968	-0.048685043817289	-0.0588215180701492	-0.208381337367904	0.159658834296171	-0.032971635762632	-0.130304264142764	0.080074400672157	-0.0978600546827202	-0.000527426302587009	-0.0223077352071831	0.317320341145326	-0.046160290067684	-0.011191326858036	0.031389356854868	-0.3153979322072	0.159621375041726	0.205216779552378	0.072425220914455	0.105359397422641	0.00953412944138199	0.217878007554839	-0.096390153538291	0.383678661209843	0.290905573280775	-0.232271351482852	-0.658078188611901	-0.039603422169604	-0.00768663901214706	0.061271353310864	0.0100615557439709	-0.114628315342552	0.291395540328918	-0.089268400083177	0.131246738984604	-0.358468582968248	-0.26467810168845	0.034441536907061	0.135316312387527	-0.128306936695748	-0.29000055769338	0.118095543933997	0.134336378291241
655	0	0	0	0	0	0	0	0	0.0100684655658478	0	0	0	0	0	0	0.0302053966975433	0	0	0	0.0201369311316955	0	0	0	0	0.0201369311316955	0	0	0	0	0	0	0	0	0.0704792589609343	0	0	0	0	0	0	0	0.0100684655658478	0	0	0	0	0	0.0100684655658478	0
656	0	0	0	0	0	0	0	0	0	0	0	0	0	0	0	0	0	-0.00087038262019984	0	0	0	0	0	0	0	0	0	0	0	0	0	0	0	0	0	0	0	0	0	0	0	0	0	0	0	0	0	0	0
657	0	0	0	0	0	0	0	0	0	0	0	0	0	0	0	0	0	0	0	0	0	0	0	0	0	0	0	0	0	0	0	0	0	0	0	0	0	0	0	0	0	0	0	0	0	0	0	0	0
658	0	0	0	0	0	0	0	0	0	0	0	0	0	0	0	0	0	0	0	0	0	0	0	0	0	0	0	0	0	0	0	0	0	0	0	0	0	0	0.0212901852246115	0	0	-0.0115673799884326	0	0.0212901852246115	0	0	0	0	0
659	0	0	0	0	0	0	0	0	0	0	0	0	0	0	0	0	0.0962463907603465	0	0	0	0	0	0	0	0	0	0	0	0	-0.0286615075952995	0	0	0	0	0	0	0	0	0	0	0	0	0	0	0	0	0	0	0
660	0	0	0	0	0	0	0	0	-0.256904303147078	0	0	-0.573954746938732	-0.0642260757867694	-0.256904303147078	-0.192678227360308	-0.0642260757867694	0	0	0	-0.128452151573539	0	-0.959311201659348	0	0	0	0	-0.56987481179654	-0.192678227360308	-0.321130378933847	-0.489328995441001	-0.513808606294155	-0.192678227360308	-0.0642260757867694	0	-5.04016761952894	-0.192678227360308	0	-0.192678227360308	0.204918032786885	0.0683060109289618	0	-0.124372216431346	0	-1.94204912768355	0	-0.706486833654464	-0.0642260757867694	0	-0.321130378933847
661	0	0	0	0	0	0	0	0	0	0	0	0	0	0	0	0	0	0	0	0	0	0	0	0	0	0	0	0	0	0	0	0	0	0	0	0	0	0	0	0	0	0	0	0	0	0	0	0	0
662	-0.018450184501845	0	0	0	0	-0.018450184501845	0	0	0	0	0.0290360046457607	-0.018450184501845	0	0.0580720092915215	-0.03690036900369	0	0	0.0290360046457607	0.00272145578598641	-0.0078643643579293	0	-0.0341789132177036	-0.0263145488597744	0	0	-0.03690036900369	0	-0.0263145488597744	-0.018450184501845	0	0	0.0105858201439157	0	0	0	-0.018450184501845	-0.0553505535055351	-0.03690036900369	0	-0.0553505535055351	-0.03690036900369	-0.018450184501845	0	0.0290360046457607	0.0211716402878315	-0.0738007380073801	0	0.0105858201439157	0
663	0	0	0	0.00404531748503898	0	0	0	0	0	0	0	0	-0.000505476841578503	0	0	0	0	0	0	0	0	0	0	0	0	-0.00151643052473551	0	0	0	0	0	0	0	0	0	0	0	0	0	0	0	0	-0.000505476841578503	0	0	0	0	0	0
664	0	0	-0.0014433802552822	0	0	0.0157927984838913	0	0	0	0	0	0	0	0	0	0	0	0	0	0	0	0	0	0	0	0	0	0	0	0	0	0	0	0	0	0	0	0	0	0	0	0	0	0	0	0	0	0	0
665	-0.265392781316348	-0.177427614025316	0.175930334582065	0	-0.0530785562632696	-0.212314225053079	0.034886611027763	0.229008890845334	0	0.282087447108604	0.0879651672910324	0	0	-0.0530785562632696	0	-0.177427614025316	0	0	0	0.282087447108604	0.0879651672910324	0	0	0.370052614399636	0	0	0	-0.283584726551855	-0.106157112526539	0	-0.0530785562632696	0.914538283938084	0	-0.071270501498777	0	0.245703556637589	-0.106157112526539	0.404939225427398	0.016694665792256	0.0879651672910324	0	0.282087447108604	0.141043723554302	0.175930334582065	0.0879651672910324	0	-0.0530785562632696	0	0.5459829489817
666	-0.033311125916056	0.0394011032308905	0	0	0	-0.016655562958028	-0.0272211486012214	0	-0.016655562958028	0	0	0	-0.016655562958028	0.0197005516154452	-0.033311125916056	0.0030449886574172	-0.033311125916056	0	-0.033311125916056	0.0197005516154452	0	-0.0499666888740839	0	-0.033311125916056	0	-0.0136105743006108	0	0	0	-0.016655562958028	0	0	0	0	0	0	0	-0.016655562958028	-0.033311125916056	0.0197005516154452	0	-0.016655562958028	0	-0.033311125916056	0	0	0	-0.033311125916056	0
667	0	0	0	0	0	0	0	0	0	0	0	0	0	0	0	0	0	0	0	0	0	0	0	0	0	0	0	0	0	-0.00254013411908149	0	0	0	0	0	0	0	0	0	0	0	0	0	0	0	0	0	0	0
668	0	0	0	0	0	0	0	0	0	0	0	0	0	0	0	0	0	0	0	0	0	0	0	0	0	0	0	0	0	0	0	0	0	0	0	0	0	0	0	0	0	0	0	0	0	0	0	0	0
669	0	0	-0.0125502008032129	0	0	0	0	0	0	0	0	0	0	0	0	0	0	0	0	0	0	0	0	0	0	0	0.0292682926829268	0	0	0	0	0	0	0	0	0	0	0	0	0	0	0.00975609756097561	0	0	0	0	0	0	0
670	0	0	0	0	0	0	-0.00292252389163281	0	0	0	0	0	0	0	0	0	0	0	0	0	0	0	0	0	0	0	0	0	0	0	0	0	0	0	0	0	0	0	0	0	0	0	0	0	0	0	0	0	0
671	0	-0.00692185228767218	0	0	0	0	0	0	0	0	-0.00230728409589073	0	0	-0.00230728409589073	0	0	-0.00692185228767218	0	0	0	0.00481093043394592	0	0	0.00731457677200112	0	0	-0.00230728409589073	0	-0.00461456819178145	-0.00230728409589073	0	-0.0013254728850684	0	-0.00230728409589073	0	0	0	0	-0.00692185228767218	0	0.00481093043394592	0	0	0	0	0.0144327913018378	0	0	0
672	0	0.0142897970848814	0	-0.0158579130986362	0	0	0	0	0	0	0	0	0	0	0	0	0	0	0	0	0	-0.0158579130986362	0	0	0	0	0	0	0	0	0	0	0	0	0	0	0	0	0	-0.0317158261972724	0	0.0142897970848814	-0.0158579130986362	0	0	0	0	0	0
673	0	0	0	0	0	0	0	0	0	0	0	0	0	0	0	0	0	0	0	0	0	0	0	0	0	0	0	0	0	0	0	0	0	0	0	0	0	0	0	0	0	0	0	0	0	0	0	0	0
674	0	0	0.0034162328936419	0	0	0	0.0227324391907252	0	0.0812716536143591	0.0454648783814503	0	0	0	0	0	0	-0.00965810314854163	0	0.0227324391907252	0	0	0.0034162328936419	-0.00965810314854163	-0.0193162062970833	-0.00965810314854163	0	-0.00965810314854163	0	0	0	-0.0193162062970833	0	0	0	0	0	0	0	0	0	0	0	0.0034162328936419	0	0.0227324391907252	0	0.0909297567629007	0	0
675	0	0	0	0	0	0	0	0	0	0	0	0	0	0	0	0	0	0	0	0	0	0	0	0	0	0	0	0	0	0	0	0	0	0	0	0	0	0	0	0	0	0	0	0	0	0	0	0	0
676	0	0	0	0	0	0	0	0	0	0	0	0	0	0	0	0	0	0	0	0	0	0	-0.000208692893798273	0	0	-0.0001466215555516	0	0	-0.000104346446899137	-0.000417385787596547	0.00016641778514581	0	0	-0.000521732234495683	-0.000104346446899137	0	0	0	0	-0.000104346446899137	0	-0.000104346446899137	0	0	0	0	0	0	0
677	0.0702740688685875	0.0185869943009139	0	-0.00483769532194862	0	0.0702740688685875	0.0089116036570166	0.046849379245725	0.0234246896228625	-0.00483769532194862	0.0234246896228625	-0.00967539064389725	0	0	0	0.0234246896228625	0	-0.00483769532194862	0	0.0234246896228625	0	0	0	0	0	0	0	0	-0.00483769532194862	0	0	0	0	0	-0.00483769532194862	0	0	0	0	0	0	0	0	0	0	0	0	0	0
678	0	0	0	0	0	0	0	0	0	0	0	0	0	0	0	0	0	0	0	0	0	0	0	0	0	0	0	0	0	0	0	0	0	0	0	0	0	0	0	0	0	0	0	0	0	0	0	0	0
679	0	0	0	0	0	0	0	0	0	0	0	0	0	0	0	0	0	0	0.0112714156898106	0	0	0	0	0.0112714156898106	-0.00699349604867473	0	0	-0.0139869920973495	0.0676284941388638	0.0338142470694319	0	0.0155493353309466	0	0	-0.0097090724562136	0.0338142470694319	0	-0.0139869920973495	0	0	0	0.0112714156898106	0.0155493353309466	0.0112714156898106	0	0	-0.00699349604867473	-0.0279739841946989	0.00468702970079121
680	0	0	0	-0.00086617583369424	0	0	0	0	0	0	0	0	0	0	-0.00173235166738848	0	0	-0.00086617583369424	0	0	0	0	-0.00259852750108272	0	0	0	0	0	-0.00259852750108272	0	0	0	0	0	0	0	0	0	0	0	0	0	0	0	0	0	0	0	-0.00086617583369424
681	0	0	0	0	0	0	0	-0.0244021473889702	0	0	-0.0244021473889702	0	0	0	0	0	-0.0488042947779405	0	0	0	0	0	0	0	0	0	0	0	0	0	0	0	0	0	0	0.0427441761060056	0	0	0	0	0	0	-0.0244021473889702	0	0	0	0	-0.0244021473889702	0
682	0	0	0	0	0.00724795245343191	0	0	0	0	0	0	0	0	0	0	0	0	0	0	0	0	0	0	0	0	0	0	0	0	0	0	0	0	0	0	0	0	0	0	0	0	0	0	0	0	0	0	0	0
683	0	0	0	0	0	0	0	0	0	0	0	0	0	0	0	0	0	0	0	0	-0.0499750124937531	0	0	0	0	0	0	0	0	0	0	0	0	0	0	0	0	0	0	0	0	0	0	0	0	0	0	0	0
684	0	0	0	0	0	0	0	0	0	0	0	0	0	0	0	0	0	0	0	0	0	0	0	0	0	0	0	0	0	0	0	0	0	0	0	0	0	0	0	0	0	0	0	0	0	0	0	0	0
685	-0.00597514340344168	-0.0149378585086042	-0.00896271510516252	0.0110705192073508	0	0.0110705192073508	0.0221410384147016	-0.00298757170172084	-0.0119502868068834	0	-0.00298757170172084	0	0.0110705192073508	0.0332115576220525	0.0110705192073508	-0.0119502868068834	0	0.00210780410218828	-0.00298757170172084	-0.00597514340344168	0.0221410384147016	-0.0149378585086042	-0.00298757170172084	0	0	0	0	0	0	-0.00298757170172084	0	-0.00597514340344168	0.0028043419084348	0.0186219680165714	-0.0181086600036111	0.027749722231571	-0.0602829327308257	-0.113710954458678	-0.028482641404715	-0.0019427649923516	0.0658916165476954	-0.0232040358075203	-0.056598823222859	-0.052914713714892	0.008596255518591	0.016330934121097	-0.0871710780463137	0.00227284321202499	-0.0437687688164426
686	0	-0.000805743338516949	0	0	0	0	0	0	0	0	0	0	0.000232494978706391	0	0	0	0.000769657204384357	0	0	0	0	0	0	0	0	0	0	0	-0.000268581112838983	0	0	0.000769657204384357	0	0	0	0	0.00257755272599204	0	0	0.00207647663444667	0	0	0	0	0.00257755272599204	0	0	0.00100215218309074	0
687	0	0	0.0119048547663435	0	0	0	0	0	0	0	0	0	0	0	0	0	0	0	0	0	0	0	0	0	0	0	0	0	0	0	0	0	0	0	0	0	0	0	0	0	0	0	0	0	0	0	0	0	0
688	0	0	0	0	0	0	0	0	0	0	0	0	0	0	0	0	0	0	0	0	0	0	0	0	0	0	0	0	0	0	0	0	0	0	0	0	0	0	0	0	0	0	0	0	0	0	0	0	0
689	-0.0743731406714832	-0.0592313200415287	-0.0424989375265618	0.093777448143029	0.149827644414532	0.068010893131434	-0.0849978750531237	0.0818167512830991	-0.0015905618850124	0.0454254618898634	0	0.0515331100231899	-0.0273571168966073	0.0074436106116159	0.034800727508223	0.174258236947839	0.0757091031497727	0.0515331100231899	-0.0212494687632809	0.013551258744942	0	0.0863338375314132	0	-0.0379818512782478	-0.0212494687632809	0.025766555011595	0.0090341724966281	0.0772996650347848	-0.0106247343816405	0	0.0818167512830991	0.0772996650347848	-0.0106247343816405	0.0515331100231899	-0.0106247343816405	0	0	0.0090341724966281	0.128832775057975	0	-0.0106247343816405	0	0	0	0.0045170862483141	-0.0106247343816405	0	-0.0531236719082023	-0.0106247343816405
690	0	0	0	0	0	0	0	0	0	0	0	0	0	0	0	-0.030213163542778	0.131505750773129	0.0708315625442697	-0.0575210492068244	0.0250894667744727	-0.0364405206257958	-0.00870473537604457	-0.0174094707520891	0	-0.00870473537604457	-0.0238957872385595	-0.0174094707520891	0	0	0.00708315625442697	-0.00870473537604457	0	0	0	0	0	0	0	0	0	0	0	0	0	0	0	0	0	0
691	0	0	0	0.0020943201519564	0	0.0276243093922652	0.0138121546961326	0	0.0238597122721334	-0.0117178345441762	0	0	0	-0.0117178345441762	0	0	0	-0.00585891727208812	0.0276243093922652	0	-0.00585891727208812	0	0	0	-0.00585891727208812	0	0	0	0	0	0	-0.00585891727208812	0	0	0	0	0	0.0138121546961326	0	0	0	0	0	0	0	0	0	0	0
692	0	0	0	0	0	0	0	0	0	0	0	0	0	0	0	0	0	0	0	0	0	0	0	0	0	0	0	0	0	0	0	0	0	0	0	0	0	0	0	0	0	0	0	0	0	0	0	0	0
693	0	0	0	0	0	0	0	0	0	0	0	0	0	0	0	0	-0.00730994152046784	0	0	-0.0146198830409357	0	0	0	-0.00730994152046784	0	0	0	0	0	0	0	-0.0133532427774745	0	0	-0.00730994152046784	0	0	0	0	0	0	0	0	0	0	0	0	0.038449667997531	0
694	0	0	0	0	0	0	0	0	0	0	0	0	0	0	0	0	0	0	0	0	0	0	0	0	0	0	0	0	0	0	0	0	0	0	0	0	0	0	0	0	0	0	0	0	0	0	0	0	0
695	0	-0.0534188034188034	-0.213675213675214	0.034805452652478	0.229867315561367	0	0.28328611898017	0.0882242560712816	0	0	-0.0534188034188034	0	-0.178869761022736	0	0	0	0.28328611898017	0.0882242560712816	0	0	0.371510375051452	0	0	0	-0.285707367860342	-0.106837606837607	0	-0.0534188034188034	0.917048013365289	0	-0.072032154185129	0	0.246059417447519	-0.106837606837607	0.40631582770393	0.016192101886153	0.0882242560712816	0	0.28328611898017	0.141643059490085	0.176448512142563	0.0882242560712816	0	-0.0534188034188034	0	0.547958887194015	0	0	0.141643059490085
696	0	0	0	0	0	0	0	0	0	0	0	0	0	0	0	0	0	0	0	0	0	0	0	0	0	0	-0.0037969396666287	0	0	0	0	0	0	0	0	0	0	0	0	0	0	0	0	0	0	0	0	0	0
697	0	-0.000962862397334797	0	0	0	0	0	0	0	0	0	0	0	0	0	0	0	0	0	0	0	0	0	0	0	0	0	0	0	0	0	0	0	0	0	0	0	0	0	0	0	0	0	0	0	0	0	0	0
698	0	0	0.0107240722506258	-0.0120358668833123	-0.00601793344165613	0	0	0	0	0	0	0.00837100284614097	0	0	0	0	0	0	0	0	0	0	0	0	0	0	0	0	0	0	0	0	0	0	0	0	0	0	0	0	0	0	0	0	0	0	0	0	0
699	0	0	0	0	0	0	0	0	0	0	0	0	0	0	0	0	0	0	0	-0.00294637595757219	0	-0.00294637595757219	0	-0.00294637595757219	0	0	0	0	0	0	0	0	0.00728279076542131	0	0	0	0.0232384111465408	0	0.00728279076542131	0	0	0	0	0	0	0	0	0	0
700	0	0	0	0	0	0	0	0	0	0	0	0	0	0	0	0	0	0	0	0	0	0	0	0	0	0	0	0	0	0	0	0	0	0	0	0	0	0	0	0	0	0	0	0	0	0	0	0	0
701	-0.00015582707557769	0	0	0	0	0	0	0	0	-0.00124661660462152	0	0	0	0	0	0	0	-0.00015582707557769	0	0	0	-0.00015582707557769	0	0.00727108866229383	-0.00015582707557769	0	-0.00077913537788845	0	0	0	0	0	0	0	0	0	0	0	0	0	0	0	0	0	0	0	0	0	0
702	0	0	0	0	0	0	0	0	0	0	0	0	0	0	0	0	0	0	0	0	0	0	0	0	0	0	0	0	0	0	0	0	0	0	0	0	0	0	0	0	0	0	0	0	-0.395843641761504	0	0	-0.049480455220188	0
703	0	0	0	0	0	0	0	0	0	0	0	0	0	0	0	0	0	0	0	0	0	0	0	0	0	0	0	0	0	0	0	0	0	0	0	0	0	0	0	0	0	0	0	0	0	0	0	0	0
704	0	0	0	0	0	0	0	0	0	0	0	0	-0.0154475940372287	0	0	0	0	0	0	0	0	0	0	0	0	0	0	0	0	0	0	0	0	0	0	0	0	0	0	0	0	0	0	0	0	0	0	0	0
705	0	0	0	0	0	0	0	0	0	0	0	0	0	0	0	0	0	0	0	0	0	0	0	0	0	0	0	0	0	0	0	0	0	0	0	0	0	0	0	0	-0.00072668609340823	0	0	0	0	0	0	0	0
706	0	0	0	-0.0128998968008256	0	0	0	0	0	0	0	0	0	0	0	0	0	0	0	0	0	0	0	0	0	0	0	-0.0128998968008256	0	0	0	0	0	0	-0.0128998968008256	0	0	-0.0257997936016512	0	0	0	0	0.0124409056979348	0	0	-0.0257997936016512	-0.0128998968008256	0	0
707	0	0	0	0	0	0	0	0	0	0	0	0.00655099727186202	0	0	0	0	0	0	0	0	0	0	0	0	0	0	0	0	0	0	0	-0.000966669244451319	0	0	0	0	0	0	0	0	0	0.00751766651631334	0	0	0	-0.000966669244451319	0	0	0
708	0	0	0	0	0	0	0	0	0	0	0	0	0	0	0	0	0	0	0	0	0	0	0	0	0	0	0	0	0	0	0	0	0	0	0	0	0	0	0	0	0	0	0	0	0	0	0	0	0
709	0	0	0	0	0	0	0	0	0	0	0	0	0	0	0	0.0393081761006289	0	0	0	0	0	0	0	0	0	0	0.0176818785227742	0	0	0	0	0	0	0	0	0	0.117924528301887	0	-0.0432525951557093	0	0	0	0	0	0	0	0	0	0
710	0	0	0	0	0	0	0	0	0	0	0	0	0	0	0	0	0	0	0	0	0	0	0	0	0	0	0	0	0	0	0	0	0	0	0	0	0	0	0	0	0	0	0	0	0	0	0	0	0
711	0	0	0	0	0	0	0	0	0	0	0	0	0	0	0	0	0	0	0	0	0	0	0	0	0	0	0	0	0	0	0	0	0	0	0	0	0	0	0	0	0	0	0	0	0	0	0	0	0
712	-0.00354710556186152	0	0	0	0	0	0	0	0	0	0	0	0	0	0	0	0	0	0	0	0	0	0	0	0	0	0	0	0	0	0	0	0	0	0	0	0	0	0	0	0	0	0	0	0	0	0	0	0
713	0	0	0	0.0535618639528656	0	0	0	0	0	0	0.0535618639528656	0	0	0	0	0	0	0	0	0.0535618639528656	0	0	0	0.0535618639528656	0	0.107123727905731	0.214247455811462	0	0.0535618639528656	0	0	-0.0336247478143914	0	0	0	0	0	0	-0.0336247478143914	0.0535618639528656	0	0.274058804226885	-0.0336247478143914	0	0	0	0	0.127060844044206	-0.0672494956287828
714	0	0	0	0	0	0	0	0	-0.0905797101449275	0	0	0	1.25	0	0	0	0	0	0	0	0	0	0	0	0	0	0	0	0	0	0	0	0	0	0	0	0	0	0	0	0	0	0.208333333333333	0	0	0	0	0	0
715	0	0	0	0	0	0	0	0	0	-0.012298610257041	0	0	0	0	0	0	0	0	0	0	0	0	0	0	0	0.087104968271786	0	0	0	0	0	0	0	0	0	0	-0.0368958307711229	0	-0.0491944410281638	0	0	0	0	0	0	-0.012298610257041	0	0	0
716	0	0	0	0	0	0	0	0	0	0	0	0	0	0	0	0	0	0	0	0	0	0	-0.0134408602150538	0	0.0805282654211628	0	0	0	0	0	0	0	0	0	0	0	0.0161056530842326	0	0	0	0	0	0	0	0	0	0	0	0
717	0	0	0	0	0	0	0	0	0	0	0	0	0	0	0	0	0	0	0	0	0	0	0	0	0	0	0	0	0	0	0	0	0	0	0	0	0	0	0	0	0	0	0	0	0	0	0	0	0
718	0	-0.00660894851629106	0	0	0	0	0	0	-0.0132178970325821	0	0	0	0	0.0261335424016725	0.0130667712008363	0	0.0130667712008363	0	0	0	0	0	0	0	0	0.0130667712008363	0	0	0	0	0	0	0	0	0	-0.00660894851629106	0	0	0	0	0	-0.00660894851629106	0	0	0	0	0	0	0
719	-0.788662558407846	-0.0119189511323004	0	0	-0.0119189511323004	0	0	0	-0.280095351609058	-0.00595947556615018	0	0	0	0	0	0	-0.00595947556615018	0	0	-0.125148986889154	0	0	0	0	-0.00595947556615018	0.0039476918901272	-0.0357568533969011	0	0	0	-0.0092871565388823	-0.0476758045292014	-0.0178784266984505	-0.374131063370752	-0.0119189511323004	-0.0536352800953516	-21.8903417474162	-0.674812511733598	-0.153630467423196	0.00859127015956822	0	0	-0.00595947556615018	0	0	-0.0238379022646007	-0.00595947556615018	-0.0178784266984505	-0.0219019940504967
720	0	0	0	0	0	0	0	0	0	0	0	0	0	0	0	0	0	0	0	0	0	0	0	0	0	0	0	0	0	0	0	0	0	0	0	0	0	0	0	0	0	0	0	0	0	0	0	0	0
721	0	0	0	0	0	0	0	0	0	0	0	0	0	0	0	0	0	0	0	0	0	0	0	0	0	0	0	0	0	0	0	0	0	0	0	0	0	0	0	0	0	0	0	0	0	0	0	0	0
722	0	0	0	0	0	0	0	0	0	0	0	-0.00875171387730097	0	0	0	0	0	0	0.00600835160873614	0	0	0	0	0	0	0	0	0	0	0	0	0	0	0	0	0	0	0	0	0	0	0	0	0	0	0	0	0	0
723	0	0	0	0	0	0	0	0	0	0	0	0	0	0	0	0	0	0	0	0	0	0	0	0	0	0	0	0	0	0	0	0	0	0	0	0	0	0	0	0	0	0	0	0	0	0	0	0	0
724	0	0	0	0	0	0	0	0	0	0	0	0	0	0	0	0	0	0	0	0.0595947556615018	0	0	0	0	0	0	0.0595947556615018	0	0	0	0	0	0	0	0	0	0	0	0	0	0	0	0	0	0	0	0	0	0
725	0	0.00884361980893938	0	0	0	0	0	0.00595983074080696	0	0.0014418945340662	-0.00903587241348152	-0.0271076172404446	0	0	0	0	0	-0.00451793620674076	0.0119196614816139	-0.00451793620674076	0.00595983074080696	-0.0135538086202223	0	0	-0.0106700195520899	-0.00451793620674076	0	0.0119196614816139	0	0	0	0.00595983074080696	0	0	0	0	0	0	0	0	0	0	0	0	0	0	0	0	0
726	0	0	0	0	0	0	0	0	0	0	0	0	0	0	0	0.00285005842619774	0	-0.00261516534382886	0	0	0	0	0	0	0	0	0	0	0	0	0	0	0	0	0	0	0	0.00285005842619774	0	0	0	0	0	0	0	0.00142502921309887	0	0	0
727	0	0	0	0	0	0	0	0	0	0	0	0	0	0	0	0	0	0	0	0	0	0	0	0	0	0	0	0	0	0	0	0	0	-0.0155884645362432	0	-0.0155884645362432	0	0	0	0.0678733031674208	0	0	0	0	0	0	0	0	0
728	0	0	0	0	0	0	0	0	0	0	0	0	0	0	0	0	0	0	0	0	0.00269527249204895	0	0	0	0	0	0	0	0	0	0	0	0	0	0	0	0	0	0	0	0	0	0	0	0	0	0	0	0
729	0	0	0	0	0	0	0	0	0	0	0	0	0	0	0	0	0	0	0	0	0	0	0	0	0	0	0	0	0	0	0	0	-0.00452243125904486	0	0	0	0	0	0	0	0	0	0	0	0	0	0	0	0
730	0	0	0	0	0	0	0	0	0	0	0	0	0	0	0	0	0	0	0	0	0	0	0	0	0	0	0	0	0	0	0	0	0	0	0	0	0	0	0	0	0	0	0	0	0	0	0	0	0
731	0	0	0	0	0	0	0	0	0	0	0	0	0	0	0	0	0	0	0	0	0	0	0	0	0	0	0	0	0	0	0	0	0	0	0	0	0	0	0	0	0	0	0	0	0	0	0	0	0
732	-0.0143802128271498	-0.219655878046662	0	0	-0.0736954692590579	0	0	0	0	0	-0.086632666435356	0	-0.0143802128271498	0	0.00107914025805329	0	-0.00719010641357492	0	-0.00719010641357492	0	0	-0.00719010641357492	0	0	0	0	0	0	0	0	-0.00719010641357492	0	0	0	0.00107914025805329	0	0	0	0	0	0	-0.00719010641357492	-0.0481724643789179	-0.239758209795854	0.0136649479618947	0.00826924667162821	0.0186967738593631	0	0
733	0	0	0	0	0	0	0	0	0	0	0	0	0	0	0	0	0	0	0	0	0	0	0	0	0	0	0	0	0	0	0	0	0	0	0	0	0	0	0	0	0	0	0	0	0	0	0	0	0
734	0	0	0	0	0	0	0	0	0	0	0	0	0	0	0	0	0	0	0	0	0	0	0	0	0	0	0	0	0	0	0	0	0	0	0	0	0	0	0	0	0	0	0	0	0	0	0	0	0
735	0	0	0	0	0	0	0	0	0	0	0	0	0	0	0	0	0	0	0	0	0	0	0	0	0	0	0	0	0	0	0	0	0	0	0	0	0	0	0	0	0	0	0	0	0	0	0	0	0
736	0	0	0	0	0	0	0	0	0	0	0	0	0	0	0	0	0	0	0	0	0	-0.00263928844783446	0	-0.00263928844783446	0	0	0	0	0	0	-0.00263928844783446	0	-0.00527857689566893	0	0	0	0	0	0	0	0	0	0	0	0	0	0	0	0
737	0	0	0	0	0	0	0	0	0	0	0	0	0	0	0	0	0	0	0	0	0	0	0	0	0	0	0	0	0	0	0	0	0	0	0	0	0	0	0	0	0	0	0	0	0	0	0	0	0
738	0	0	0	0	0	0	0	0	0	0	0	0	0	0	0	0	0	0	0	0	0	0	0	0	0	0	0	0	0	0	0	0	0	0	0	0	0	0	0	0	0	0	0	0	0	0	0	0	0
739	0	0.00202683529936357	0	0	0	0	0	0	0	0	0	0	0	0	0	0	0	0	0	-0.00163153429485088	0	-0.00815767147425439	0	-0.0029180978619891	-0.00247246658067636	-0.0282320445705778	0	0.00647580690260341	-0.00123623329033819	0	-0.0417802804874977	-0.00163153429485088	0.00405367059872715	-0.0110254390594434	-0.447616053463606	-0.0191831105336978	0	-0.00489460288455263	0.00444897160323984	-0.181006987384736	-0.00326306858970176	-0.0383662210673957	0	-0.0155247409394834	-1.60245086834436	-0.0088046238627676	0	-0.003414059420102	-0.00489460288455263
740	0	0	0	0	0	0	0	0.0246388359151204	0	-0.00231943220299671	0.0028972377570581	0	0.0101444371430788	0.0028972377570581	0.00956663158901751	-0.00463886440599341	0.0231861120432159	0	0	0	0.00028890277703068	0	0	0	-0.00231943220299671	0	0	0	0.06957475610315	0	0	0	0	0	0	-0.00231943220299671	0.00956663158901751	0	0.00956663158901751	0	-0.00203052942596599	-0.0249359486789024	-0.00927772881198683	0.0049277671830241	0.0292777003211138	0.065802600028249	0.0168138309750383	0.017102733752069	-0.00231943220299671
741	0	0	0	0	0	0	0	0	0	0	0	0	0	0	0	0	0	0	0	0	0	0	0	0	0	0	0	0	0	0	0	0	0	0	0	0	0	0	0	0	0	0	0	0	0	0	0	0	0
742	0	0	0	0	0	0	0	0	0	0	0	0	0	0	0	0	0	0	0	0	0	0	0	0	0	0	0	0	0	0	0	0	0	0	0	0	0	0	-0.000334226833067066	0	0	0	0	0	0	0	0	0	0
743	0	0	0	0	0	0	0	0	0	0	0	0	0	0	0	0	0	0	0	0	0	0	0	0	0	0	0	0	0	0	0	0	0	0	0	0	0	0	0	0	0	0	0	0	0	0	0	0	0
744	0	0	0	0	0	0	0	0	0	0.00344441574097994	0	0	0	0	0	0	0	0	0	0	0	0	0	0	0	0	0	0	0	0	0	0	0	0	0	0	0	0	0	0	0	0	0	0	0	0	0	0	0
745	0	0	0	0	0	0	0	0	0	0	0	0	0	0	0	0	0	0	0	0	0	0	0	0	0	0	0	0	0.0942507068803016	0	0	0	0	0	0	0	0	0	0	0	0	0	0	0	0	0	0	0	0
746	0	0	0	0.0455314166775075	0	0.00650448809678678	0	0	0	0	0	0	0	0	0.0209169525911871	0	0	0.00650448809678678	0	0	0	0	0.00325224404839339	0	0	0	0	0	0	0	0	0	0	0	0	0	0	0	0	0	0	0	0	0	0	0	0.00650448809678678	0	0
747	0	0	0	0	0	0	0	0	0.0150120096076861	-0.00337906332364669	0	0	-0.0101371899709401	0	0	0	0	0	0	0	0	0	0.00500400320256205	0	0	0	0	0	0	0	0	0	0	0	0	0	0	0	0	0.00500400320256205	0	-0.00337906332364669	0	0	-0.00337906332364669	-0.00675812664729337	0	0	0
748	0	0	0	-0.0182415176942722	0	0	0	0	-0.0182415176942722	0.021944261575598	0	0	0	0	0	0	0	0	0	0	0	0	0	0	0	0	0	0	0	0	0.0877770463023919	0	0.0877770463023919	0.021944261575598	-0.0364830353885443	0	0	-0.0182415176942722	0.043888523151196	0	0	-0.0182415176942722	0	0	0	-0.087504844590035	0	0	0
749	0	0	0	0	0	0	0	0	0	0	0	0	0	0	0	0	0	0	0.00504744599232788	0	0	-0.00415869583298678	0.00504744599232788	-0.00623804374948016	0	0.00504744599232788	-0.00207934791649339	0	0.00801554406816241	0	0	0	0	0	0.00504744599232788	0	0	0.00504744599232788	0	0	0	0	0	0	-0.00623804374948016	-0.00207934791649339	0	0	0
750	0	0	0	0	0	0	0	0	0	-0.0202142712755205	0	0	0	0	0	0	0	0	0	0	0	0	0	0	0	0	0	0	0	0	0	0	0	0	0	0	0	0.0261369576581286	0	-0.040428542551041	0	0	0	0	0	0	0	0	0
751	0	0	0	0	0	0	0	0	0	0	0	0	0	0	0	0	0	0	0	0	0	0	0	0.010919414719371	0	0	0	0	0	0	0	0	0	0	0	0	0	0	0	0	0	0	0	0	0	0	0	0	0
752	0	0	0	0	0	0	0	0	0	0	0	0	0	0	0	0	0	0	0	0	0	0	0	0	0	0	0	0	0	0	0	0	0	0	0	0	0	0	0	0	0	0	0	0	0	0	0	0	0
753	0	0	0	0	0	0	0	0	0	0	0	0	0	0	0	0	0	0	0	0	0	0	0	0	0	0	0	0	0	0	0	0	0	0	0	0	0	0	0	0	0	0	0	0	0	0	0	0	0
754	0	0.0155273512094679	0	0	-0.0601612321020334	0	0.101701248888153	0	0	0	0	0.0137797988149373	0	0.0017475523945306	0	0	0	0.0568667476542798	0	0.0293071500244052	0.11548104770309	0.0706465464692171	0	0	0	0	0	0	0.031255322760243	-0.0102846940258761	0.0430869488393425	0	0	0	0	-0.027358977288567	0	0	0	0	0	0.103448801282683	0.0551191952597492	5.70165828629077	0.111985942914029	0.0137797988149373	0.0413393964448119	0	0.0137797988149373
755	0	0	0	0	0	0	0	0	0	0	0	0	0	0	0	0	0	0	0	0	0	0	0	0	0	0	0	0	0	0	0	0	0	0	0	0	0	0	0	0	0	0	0	0	0	0	0	0	0
756	0	-0.0124703828407532	0	0	0	0	0	-0.00623519142037661	0.0201816347124117	0	-0.0124703828407532	0	0	0	-0.00623519142037661	0.0201816347124117	0	0	0	0	0	0	0	-0.00623519142037661	0	0	-0.00623519142037661	0	0	0	0	0	-0.00623519142037661	0	-0.00623519142037661	0	-0.0124703828407532	0	0	0	-0.0187055742611298	0.0341280780044468	0.0201816347124117	-0.0124703828407532	0	0	-0.0187055742611298	0	0
757	0	0	0	0	0	0	0	0	0	0	0	0	0	0	0	0	0	0	0	0	0	0	0	0	0	0	0	0	0	0	0	0	0	0.0198059021588433	0	0	-0.001387055428609	0	0	0.00546067841272539	0	0	0	0	0	0	0	0.0064790841587545	0
758	-0.084909739186941	0.057351023720341	0	0.696382750452805	0.0266453503863576	-0.13368343447191	0	-0.018068021950986	0	-0.06278139428833	-0.0045170054877465	0	0	0.48321994736194	0.0799360511590727	0	0.0442566897972218	-0.0934870676223123	0.0709020401835798	-0.116528777601166	-0.0311623558741041	0	0	-0.0311623558741041	0	0	-0.370801312621866	0	-0.0311623558741041	0	0	0	0.0266453503863576	-0.0451700548774649	0	0	0.393793202687252	0	0.0487736952849686	0	0.0754190456713259	0.541027653622402	0	0.106124719005308	3.69502673544139	0.438963257564718	0.0221283448986111	1.62622991873459	-0.00497368802786799
759	0	0	0	0	0	0	0	0	0	0	0	0	0	0	0	0	0	0	0	0	0	0	0	0	0	0	0	0	0	0	0	0	0	0	0	0	0	0	0	0	0	0	0	0	0	0	0	0	0
760	0	0	0.00265663808847531	0	0	0	0	0	0	0	0	0	0	0	0	0	0	-0.00191530520388424	0	0	0	0	0	0	0	-0.00191530520388424	0	0	0	0	0	0	0	0	0	0	0	0	0	0	0	0	0	0	-0.00191530520388424	0	0	0	0
761	0.00866250866250866	0	0	0	0.00866250866250866	0	0	0	0	0	0	0	0	-0.00585137507314219	0	0	0	-0.0322971168494866	0	0	0	0	0.0229472845037502	0	0.00866250866250866	-0.00585137507314219	0	0	-0.00585137507314219	0	0	-0.0234055002925688	0	0	0	0	0	0	0	0	0	0	0	0	0	0	0	0	0
762	0.00485649069982031	0	0.0128510215441399	0.0145694720994609	-0.00881639850121226	0	0.0145694720994609	-0.00440819925060613	0	0	-0.00881639850121226	0	-0.00440819925060613	0	-0.00440819925060613	0	0	0	0	0	0	-0.00440819925060613	0	0	0	0	0	0	0	0	0	0	0	0	0	0.0242824534991016	0	0	-0.00440819925060613	0	0.0437084162983828	0.00485649069982031	0	0.0247307449483158	0.0194259627992812	-0.0132245977518184	0.00485649069982031	-0.00440819925060613	0
763	0	0	0	-0.0218197687104517	0	0	0.0755857898715042	0	0	0	0	0.226757369614512	0	0	0	0	0	0	0	0	0	0	0	0	0	0	0	0	0	0	0	0	0	0	0	0	0	0	0	0	0	0	0	0	0	0	0	0	0
764	-0.00434933890048713	0	0	0	0	-0.0130480167014614	0	0	0	-0.00434933890048713	0	0	-0.00434933890048713	0	0	0	0.00597514340344168	-0.00434933890048713	-0.00869867780097425	0	0	0	0	0	-0.00434933890048713	0	0	0	0	-0.00869867780097425	0	0	0	0	0	0	0	0	-0.0130480167014614	-0.0217466945024356	-0.0201208899994811	0	0	0	0.00597514340344168	0	0	0	0
765	0	0	0	0	0	0	0	0	0	0	0	0	0	0	0	0	0	0	0	0	0	0	0	0	0	0	0	0	0	0	0.0198294665873488	0	0	0	0	0	0	0	0	0	0	0	0	0	0	0	0	-0.0219756070761455	0
766	0	0	0	0	0	0	0	0	0	0	0	0.0222494159528312	0	0	0	0	0	0	0	0	0	0	0	0	0	0	0	0	0	0	0	0	0	0	0	0	0	0	0	0	0	0	0	0	0	0	0	0	0
767	0	0	0	0	0	0	0	0	0	0	0	0	0	0	0	0	0	0	0	0	0	0	0	0	0	0	0	0	0	0	0	0	0	0	0	0	0	0.00556111667222778	0	0	0	0	0	0	0	0	0	0	0
768	0	0	0	0	0	0	0	0	0	0	0	0	0	0	0	0	0	0	0	0	0	0	0	0	0	0	0.00500951808436028	0	0	0	0	0	0	0	0	0	0	0	0.00166983936145343	0	0	0	0	0	0	0	0	0	0
769	0	0	0	0	0	0	0	0	0	0	0	0	0	0	0	0	0	0	0	0	0	0	0	0	0	0	0	0	0	0	0	0	0	0	0	0	0	0	0	0	0	0	0	0	0	0	0	0	0
770	0	0	0	0	0	0	0	0	0	0	0	0	0	0	0	0	0	0	0	0	0	0	0	0	0	0	0	0	0	0	0	0	0	0	0	0	0	0	0	0	-0.00551267916207277	0	0	0	0	0	0	0	0
771	0	0	0	0	0	0	0	0	-0.0018216263480035	0	0	0	0	0	0	0	0	0	0	0	0	0	0	0	0	0	0	0	0	0	0	0	0	0	0	0	0	0	0	0	0	0	0	0	0	0	0	0	0
772	0	0	0	0	0	0	-0.0361532899493854	0	0	0	0	0	0	0	0	0	0	0	0	0	0	0	0	0	0	0	0	0	0	0	0	0	0	0	0	0	0	0	0	0	0	0	0	0	0	0	0	0	0
773	0	0	0	0	0	0	0	0	0	0	0	0	0	0	0	0	0	0	0	0	0	0	0	0	0	0	0	0	0	0	0	0	0	0	0	0	0	0	0	0	0	0	0	0	0	0	0	0	0
774	-0.0100664384940608	0	-0.0704650694584256	0	-0.0100664384940608	0.0321027287319422	0	0	0.0009517066248799	0	0.0198581908654907	0	0	0.0160513643659711	0	0.0321027287319422	0	0	0	0	0.0160513643659711	0	0	0	0	0	0	0	0.0110181451189407	0	0	0	-0.0342808281043329	-0.0100664384940608	0	0	0	0.0321027287319422	-0.0100664384940608	0	0	-0.0050332192470304	0.0481540930979133	0	0	-0.0191811703632417	0	-0.0150996577410912	0
775	0	-0.000245120268259622	0	0	0	0	0	0	0	0	0	0	0	0	0	0	0	0	0	0	0	0	0	0	0	0	0	0	0	0	0	0	0	0	0	0	0	0	0	0	0	0	0	0	0	0	0	0	0
776	0	0	0	0	0	0	0	0	0	0	0	0	0	0	0.00172385340583069	0	0	0	0	0	0	0	0	0	0	0	0	0	0	0	0	0	0	0	0	0	0	0	0	0	-0.0016476907613979	0	0	0	0	0	0	0	0
777	0	0	0	0	0	0	0	0	0	0	0	0	0	0	0	0	0	0	0	0	0	0	0	0	0	0	0	0	0	-0.0220994475138122	0	0	0	0	0	0	0	0	0	0	0	0	0.0188769558779884	0	-0.0110497237569061	0	0	0	0
778	0	0	0	0	0	0	0	0	0	0	0	0	0	0	0	0	0	0	0	0	0	0	0	0	0	0	0	0.0360750360750361	0	0	0	0	0	0	0	0	0	0	0	0	0	0	0	0	0	0	0	0	0
779	0	0	0.00425839969339522	0	0	0	0	-0.00150963904530427	0.0392942014008261	0	0	0.00700716034148617	0.00425839969339522	0.0255503981603713	0	0.0127751990801857	0	0	0.00425839969339522	0	0	0	0	0	0	0	0	0	0	0	0	0	0	0	0	0	0.00425839969339522	0	0	0	0	0	0	0	0	0	0	0	0
780	0	0	0	0	0	0	0	0	0	0	0	0	0	0	0	0	0	0	0	0	0	0	0	0	0	0	0	0	0	0	0	0	0	0	0	0	0	0	0	0	0	0	0	0	0	0	0	0	0
781	0	0	0	0.00377774813241869	0	0	0	0.00377774813241869	0	0	0	0	0	0.0810575008372101	0	0	0	0	0	0	0	0	0	0	0	0	0	0	0	0	0	0	0	0	0	0	0	0	0	0	0	0	0	0	0	0	0	0	0
782	-0.021487783595113	-0.0209424083769634	0	0	-0.0209424083769634	-0.06282722513089	0	0	0	0.0311409249563699	0	0.0362401832460733	-0.0209424083769634	0	0	0	0.0260416666666667	0	-0.0837696335078534	-0.0209424083769634	0.0260416666666667	-0.0209424083769634	0	0	0	0	0.0520833333333333	0	0.0260416666666667	0	0	0	-0.0209424083769634	0	0	-0.0209424083769634	0	0	0	0	0	0	0.0050992582897033	0	0	0	0	0	0
783	0	0	0	0	0	0	0	0	0	0	0	0	0	0	0	0	0	0	0	0	-0.114744693057946	0	0	0	0	0	0	0	-0.286861732644865	0	-0.057372346528973	0	0	0	0	0	0	0	0	0.0501002004008016	-0.172117039586919	0	0	0	0	0.135756308946062	0	-0.416150717959154	0
784	0	0	0	0	0	0	0	0	0	0	0	0	0	0	0	0	0	0	0	0	-0.00148495738172314	0	0	0	0	0	0	0	0	0	0	0	0	0	0	0	0	0	0	0	0	0	0	-0.00148495738172314	0	0	-0.00148495738172314	0	0
785	0	0	0	0	0	-0.00962927298988926	0	-0.0288878189696678	0	0	0	0	-0.00962927298988926	0	0	0	-0.00962927298988926	0	0	0	0	0	-0.00962927298988926	0	-0.00962927298988926	0	0	0	0	0	0	0	0	0	0	0	0	0	0	0	0	0	0	0	0	0	0	0	0
786	0	0	0	0	0	0	0	0	0	0	0	0	0.00298748244854061	0	0	0.00298748244854061	0	0	0	0.00597496489708123	0	0	0	0	0	0	-0.00408939415625575	0.00597496489708123	0.00298748244854061	0	0	0	-0.00204469707812788	0	0.0128927151645752	0.00597496489708123	0	0.0297156981481038	0	-0.00204469707812788	0	0.0067586239301916	0.00691775026749396	0.00597496489708123	0	0	0	0	0
787	0	0	0	0	0	0	-0.00275277341921986	0	0	0	0	0	0	0	0	0	0	0	0	0	0	0	-0.00137638670960993	0	0	0	0	0	-0.00137638670960993	0	0	0	0	0	0.0145109296450874	0	0.0258955545964609	0	0.00431592576607682	0	0	0	0.00863185153215365	0	0.0390300975319384	0.00431592576607682	0	0	0.00744223045979077
788	0	0	0	0	0	0	0	0	0	0	0	0	0	0	0	0	0	0	0	0	0	0	0	0	0	0	0	0	0	0	0	0	0	0	0	0	0	0	0	0	0	0	0	0	0	0	0	0	0
789	-0.0877706260971328	-0.0585137507314219	0	-0.0292568753657109	0	-0.0877706260971328	-0.131796720260758	0.116464377002611	0	-0.175541252194266	-0.0732829695293357	-0.0292568753657109	0	0	0	0	0	0	-0.0292568753657109	-0.117027501462844	0	0	0	-0.0585137507314219	-0.0292568753657109	0	-0.0292568753657109	0	0	-0.0292568753657109	-0.175541252194266	-0.117027501462844	0	-0.0292568753657109	-0.0877706260971328	0	-0.0292568753657109	-0.0877706260971328	0	0	0	0	0	0	-0.0585137507314219	0	-0.0877706260971328	0	0
790	-0.0549777686543517	0	0	0	-0.0987507900875141	-0.0827985924239288	0	-0.135402635857082	0	0	0	0	0	-0.0413992962119644	0	-0.0987507900875141	0	0	0	0	-0.103498240529911	0	0	-0.0549777686543517	0.0230733733271804	0	0	-0.0413992962119644	0	0	0	0	0	0	0	0	0	0	0	0	0	-0.0206996481059822	0	0	0	0	0	0	0
791	0	0	0	-0.0208659363588941	0	0	0	0	0	0	0	0	0	0	0	0	0	0	0	0	0	0	0	0	0	0	0	0	0	0	0	0	0	0	0	0	0	0	0	0	0	0	0	0	0	0	0	0	0
792	0	0	0	0	0	0	0	0	0	0	0	0	0	0	0	0	0	0	0	0	0	0	-0.0031358120185222	0	0	-0.0031358120185222	0	0	0	0	0	0	0	0	0	0	0	0	0	0	0	0	0	0	0	0	0	0	0
793	0	0	0	0	0	0	0	0	0	0	0	0	0	0	0	0	0	0	0	0	0	0	0	0	0	0	0	-0.0287191269385411	0	0	0	-0.0174106208145929	0	0	0	-0.0287191269385411	0	0	0	0	0	0	0	-0.0574382538770821	0	0	0	0	0
794	0	0	0	0	0	0	0	0	0	0	0	0	0	0	0	0	0	0	0	0	0	0	0	0	0	0	0	0	0	0	0	0	0	0	0	-0.00290305895776101	0.00010437413807677	0	-0.00138302543729536	-0.00103726907797152	-0.000691512718647678	0	-0.00324881531708484	0	0	-0.00172878179661919	0	0	0
795	0	0	0	0	0	0	0	0	0	0	0	0	0	0	0	-0.00310154456919546	0	0	0	0	0	0	-0.00310154456919546	0	0	0	0	0	0	0	0	0	0	0	0	0	0	0	0	0	0	0	0	0	0	0	0	0	0
796	-0.117984156413282	-0.0168548794876117	-0.0674195179504467	0.0020773431553266	0	0	0	0	0	0	0	0	0	0	0	0	0	0	0	0	0	0	0	-0.0168548794876117	0	0	0	-0.0168548794876117	0	0	0	0	0	0	0	0	0	0	0	0	0	0	0	0	0	0	0	0	-0.0168548794876117
797	0	0	0	0	0	0	0	0	0	0	0	0	0	0	0	-0.00482404303046383	0	0	0	0	0	0	0	0	0	0	0	0	0	0	0	-0.00241202151523192	0	0	-0.00241202151523192	0	0	0	0	0	0	0	0	0	-0.00241202151523192	0	0	0	0
798	0	0	0	0	0	0	0	0	0	0	0	0	0	0	0	0	0	0	0	0	0	0	0	0	0	0	0	0	0	0	0	0	0	0	0	0	0	0	0	0	0	0	0	0	0	0	0	0	0
799	0	0	0	0	0	0	0	0	0	0	0	0	0	0	0	0	0	0	0	0	0	0	0	0	0	0	0	0	0	0	0	0	0	0	0	0	0	0	0	0	0	0	0	0	-0.00815793767335618	0	0	0	0
800	0	0	0	0	0	0	0	0	-0.0129282482223659	-0.00646412411118293	0	0	0	0	0	0	0	0	0	0	0	0	0	0	0	0	0	0	0	0	0	0	0	0	0	0	0	0	0	0	0	0	0	0	0	0	0	0	0
801	0	0	0	0	0	0	0	0	0	0	0	0	0	0	0	0	0	0	0	0	0	0	0	0	0	0	0	0	0	0	0	0	0	0	0	0	0	0	0	0	0	0	0	0	0	0	0	0	0
802	0	0	0	0	0	0	0	0	0	0	0	0	0	0	0	0	0	0	0	0	0	0	0	0	0	0.00283977963310047	0	0	0	0	0	0	0	0	0	0	0	0	0	0	0	0	0	0	0	0	0	0	0
803	0	0	0	0	0	0	-0.0200682319887618	0.0452761847268337	0	0	0.0150920615756112	0	0	0	0	0	0	0	0	0	0	0	0	0	0	0	0	0	0	0	0	0	0	0	0	0	0	0	0	0	0	0	0	0	0	0	0	0	0
804	0	0	0	0	0	0	0	0	0	0	0	0	0	0	0	0	0	0	0	0	0	0	0	0	0	0	0	0	0	0	0	0	0	0	0	0	0	0	0.00537230041903943	0	0	0	0	0	0	0	0	0	0
805	0	0	0	0	0	0	0	0	0	0	0	0	0	0	0	0	0	0	0	0	0	0	0	0	0	0	0	0	-0.0103181427343078	0	0	0.0150350438747176	0	0	0	0	0	0	0	0	-0.00687876182287188	0	0.00730460189919649	0	0	0	0	0	0
806	0	0	-0.0123031496062992	0	-0.00113401333802166	0	0	0	0	0	0	0	0	0	-0.00615157480314961	0	0	0	0	0	0	-0.00615157480314961	0	0	0	0	0	0	-0.030757874015748	0	0	0	0	0	-0.0615157480314961	0	0	0	0	0	-0.0184547244094488	0.00501756146512795	0	0	0	-0.00615157480314961	0	0	-0.0246062992125984
807	0	0	0	0	0	0	0	0	0	0	0	0	0	0	0	-0.0144843568945539	0	0	-0.0144843568945539	0	0.0269179004037685	0	-0.0144843568945539	0	0	0	0.0269179004037685	0	0	0	-0.0144843568945539	0	0	0	0	0	-0.0289687137891078	0	0	0	0	0	0	0	0.0269179004037685	0	0	0.0807537012113055	0
808	0	0	0	0	0	0	0	0	0	0	0	0	0	0	0	0	0	0	0	0	0	0	0	0	0	0	0	0	0	0	0	0.0289351851851852	0	-0.0269832703723691	0	0	0	0	0	0	0	0	0	0	0	0	0	0	0
809	0	0	0	0	0	0	0	0	0	0	0	0	0	0	0	0	0	0	0	0	0	0	0	0	-0.0588581518540318	0	0	0	0	-0.235432607416127	0	-0.161312035865904	0	0	0	0	0	0	0	0.0076312098480959	0	0	0	0	-0.117716303708064	0	-0.0588581518540318	0	0
810	0	0	-0.244977951984321	0	0	0.0623830318153462	0	0.0623830318153462	0.124766063630692	0	-0.071216297956765	0	0	0	0	-0.396243814039269	0	0	-0.391964723174914	0	0.187149095446039	0.00027508441270796	0	-0.752600388235803	0	-0.391964723174914	-0.0979911807937286	0	0.0133874414184819	0	0.0133874414184819	0	0	-0.146986771190593	0	0.076045557646537	-0.0356081489783824	-0.146986771190593	0	0	0	-0.00883326614141799	0	-0.146986771190593	0	0	0	0	0
811	0	0	0	0	0	0	-0.00481486831335163	0	0	0	0	0	0	0	0	0	0	0	0	0.00398252765744102	0	0	0	0	0	0	0	0	0	0.00879739597079265	0	-0.00481486831335163	0	0	0	0	0	0	0	0	0	0	0	0	0	0	0	0	0
812	0	0	0	0	0	0	0	0	0	0	0	0	0	0	0	0	0	0	0	0	0	0	0	0	0	0	0	0	0	0	0	0	0	0	0	0	0	0	0	0	0	0	0	0	0	0	0	0	0
813	0	0	0	0	0	0	0	0	0	0	0	0	0	0	0	0	0	0	0	0	0	0	0	0	0	0	0	0	0	0	0	0	0	0	0	0	0	0	0	0	0	0	0	0	0	0	0	0	0
814	0	0	0	0	0	0	0	0	0	0	0	0	0	0	0	0	0	0	0	0	0	0	0	0	-0.00956205775482884	0	0	0	-0.00956205775482884	0	0	0.0128998968008256	0	0	0.0128998968008256	-0.00956205775482884	0	0	0.0066756780919935	0	0.00333783904599676	0	0	0	0	0	0	0	0
815	-0.0578749065901619	0.0226012614900633	0	0.029655990510083	-0.0734214390602056	-0.0578749065901619	-0.0070547290200198	-0.110132158590308	-0.0578749065901619	0.0452025229801264	-0.110132158590308	0.04663959741013	-0.040891299690115	-0.241428504240676	-0.117186887610328	-0.0734214390602056	0.177935943060498	0.0522572520001463	-0.117186887610328	-0.110132158590308	-0.028218916080079	0	0.118623962040332	-0.0141094580400395	-0.080476168080225	0.0819132425102292	-0.110132158590308	-0.0070547290200198	0	0.0889679715302491	-0.146842878120411	-0.0367107195301028	0.029655990510083	0	-0.0367107195301028	0	0.029655990510083	-0.0367107195301028	0	-0.0141094580400395	-0.110132158590308	-0.0437654485501226	0	0.008491803450024	-0.0437654485501226	0	-0.0875308971002449	0.107388652860301	-0.00418058016001199
816	0	0	-0.0178491744756805	0	0.0251572327044025	-0.00892458723784025	0	0	0	0	0	0	0	0	-0.0478559942074378	-0.0267737617135207	0	-0.0267737617135207	-0.00892458723784025	0	-0.0141951453613194	0	-0.00892458723784025	0	0	-0.00892458723784025	-0.0178491744756805	0	0.0235407036952843	0	0	0	-0.0267737617135207	0	0	-0.0320443198369999	0	0	-0.0178491744756805	0.0125786163522013	0	0	0	-0.0178491744756805	0.0125786163522013	0	0	0	0.0125786163522013
817	0	0	0	0	0	0	0.0910332271279017	0	0	0	0	0	0	0	0	0	0	0	0	0	0	0	0	0	0	0	0	0	0	-0.0292312189418299	0	0	0	0.0910332271279017	0	0	-0.0292312189418299	0	0	0	0.0455166135639508	0	0	0	0	0	-0.0292312189418299	0	0
818	0	0	0	0	0	0	0	0	0	0	0	0	0	0	0	0	0	0	0	0	0	0	0	0	0	0	0	0	-0.00785761992692413	0	0	0	0	0	0	0	0	0	0	0	0	0	0	0	0	0	0	0	0
819	0	0	0	0	0	0	0	0	0	0	0	0	0	0	0	0	0	0	0	0	0	0	0	0	0	0	0	0	0	0	0	0	0	0	0	0	0	0	0	0	0	0	0	0	0	0	0	0	0
820	0	0.0438981562774363	0	0	0	0	0	0	0	0	0	0	0	0	0	-0.036941263391208	0	0	0.0438981562774363	-0.036941263391208	0	0	0	0	0	0	0	0	0	0	0	0	0	0	0	0	0	0	0	0	0	0	0	0	0	0	0	0	0
821	0	0	0	0	0	0	0	0	0	0	0	0	0	0	0	0	0	0	0	0	0	0	0	0	0	0	0	0	0	0	0	0	0	0	0	0	0	0	0	0	0	0	0	0	0	0	0	0	0
822	0	0	0	0	0	0	-0.0995421063109695	0	0	0	0	0	0	-0.0398168425243878	0	0	0	0	0	0.0306221497332583	0	0.0505305709954522	0	0	0.0107137284710644	0	0.0505305709954522	0	0	0	0.09338548487971	-0.0199084212621939	0	-0.0199084212621939	0	-0.0398168425243878	0	0.0107137284710644	0	0	0	-0.00919469279112951	0	0	0	0	1.38719143078776	-0.0398168425243878	0
823	0	0	0	0	0	0	0	0	0	0	0	0	0	0	0	0	0	0	0	0	0	0	0	0	0	0	0	0	0	0	0	0	0	0	0	0	0	0	0	0	0	0	0	0	0	0	0	0	0
824	0	0	0	0	0	0	0.0056554688383667	0	0	-0.00455684666210982	0	0	0	0	0	-0.0012609801333392	0	0	0.0056554688383667	0	0.0113109376767334	-0.00455684666210982	0	0	0	0	0	0.0417855262210807	0	0	0.0576533105599239	0	0.0677032681033181	0	0	0.0056554688383667	0	0	0	0	0	0	0	0	0	0	0	0	0
825	-0.0242440381215434	0	0.26495672645768	0.0423190859077444	-0.0041126602235616	0	0	0.0423190859077444	-0.0221877080097626	-0.199689372087863	0.0201313778979818	0	0	0	0.00984972733907699	0	-0.0221877080097626	0	1.98066843122951	-0.0242440381215434	1.19272780264414	0	-0.0221877080097626	0	-0.028356698345105	0	0.0624504638057262	0	0	0.0423190859077444	0	0.12078826738789	-0.0221877080097626	0	0	0	-0.0221877080097626	0.0423190859077444	0.336496357150175	0	0	0	0	-0.050544406354868	0	0.124900927611453	0	0.211595429538722	-0.0221877080097626
826	0	0	0.00305222354485243	0	0	0	0	0	0	0	0	0	0	0	0	0	0	0	0	0	0	0	-0.00163644694639	0	0	0	0	0	0	0	0	0	0	0	0	0	0	0	0	0	0	0	0	0	0	0	0	-0.00185711729431756	0
827	0	0	0	0	0	0	0	0	0	0	0	0	0	0	0	0	0	0	0	0	0	0	-0.0140893263289254	-0.0020127609041322	0	0	0	0	0.00200729474597371	0	-0.0020127609041322	0	0.0120656331084762	0	0	0	0	0	-5.4661581584993e-06	-0.0020127609041322	0	0	0	0	0	0	0	0.00200729474597371	0
828	0	0	0	0	0	0	0	0	0	0	0	-0.0120612712579906	0	0	0	0	0	0	0	-0.0120612712579906	0	-0.0361838137739718	0	-0.0120612712579906	0	0	0	0	-0.0120612712579906	0	0.0402252614641995	0.0201126307320998	-0.0241225425159812	0	0	0	0	0	-0.0120612712579906	0	0	-0.0241225425159812	0	0	-0.0120612712579906	0	0	0	0
829	0	0	0	0	0	0	0	0	0	0	0	0	0	0	0	0	0	0	0	0	0	0	0	0	0	0	0	0	0	0	0	0	0	0	0	0	0	0	0	0	0	0	0	0	0	0	0	0	0
830	0	0	0	0	0	0	0	0	0	0	0	0	0	0	0	0	0	0	0	0	0	0	0	0	0	0	0	0	0	0	0	0	0	0	0	0	0	0	0	0	0	0	0	0	0	0	0	0	0.0124230208302694
831	0	0	0	0	0	0	0	0	0	0	0	0	0	0	0	0	0	0	0	0	0	0	0	0	0	0	0	0	0	0	0	0	0	0	0	0	0	0	0	0	0	0	0	0	0	0	0	0	0
832	-0.134108180599017	0	0	0	0	0	0	0	0	-0.0447027268663388	0	0	0	0	0	0	-0.0447027268663388	0	-0.0447027268663388	0	0	0	0	0	0	-0.0447027268663388	0	0	0	0	0	0	0	-0.0447027268663388	0	-0.0894054537326777	0	0	0	0	0	0	-0.0447027268663388	0	0	0	0	0	0
833	0	0	0	0	0	-0.0278009452321379	0	0	0	0	0	0	0	0	0	0	0	0	0	0	0	0.0573888091822095	-0.0278009452321379	0	0	0.0286944045911047	0	0	0	0	0	0	0	0	0	0	0	0	0	0	0	0	0	0	0	0	0	0	0
834	0	0	0	0	-0.0371195248700817	0	0	0	0	0	0.163532297628782	0	0	0.0855296983515043	0	0	0.0446466239443091	0	0	0	0	0	0	0	-0.0371195248700817	0	0	0	-0.0371195248700817	0	0	0	0	0	0	0	0	0	0	-0.0742390497401633	0	0	0	0	0	0	0	0	0.0408830744071954
835	0.138026224982747	0	-0.039032006245121	-0.0195160031225605	0.0299811062462524	0	0.0690131124913734	0	0	0	-0.0195160031225605	0	0	0	0	0	0	-0.039032006245121	0	0	0	0	0	0	0	0	0	-0.039032006245121	0	-0.0195160031225605	0.0690131124913734	0	0.0494971093688129	-0.039032006245121	0	0	0	0	0	0	0	0	-0.0195160031225605	0	0	0	0	0	0
836	0	0	0	0	0	0	0	0	0	0	0	0	0	0	0	0	0	0	0	0	0	0	0	0	0	0	0	0	0	0	0	0	0	0	0	0	0	0	0	0	0	0	0	0	0	0	0	0	0
837	0	0	0	0	0	0	0	0	0	0	0	0	0	0	0	0	0	0.0505561172901921	0	0	0	0	0	0	0	0	0	0	0	0	0	0.0505561172901921	0	0	0	0	0.0505561172901921	0	0	0	0	0	0	0	0	0	0	0	0
838	0	0	0	0	0	0	0	0	0	0	0	0	0	0	0	0	0	0	0	0	0	0	0	0	0	0	0	0	0	0	0	0	0	0	0	0	0	0	0.0568504832291074	0	0	0	0	0	0	0	0	0	0
839	0	0	0	0	0	0	0	0	0	0	0	0	0	0	0	0	0	0	0	0	0	0	0	0	0	0	0	0	0	0	0	0	0	0	0	0	0	0	0	0	0	0	0	0	0	0	0	0	0
840	0	0	0	0	0	0	0	0	0	0	0	0	0	0	0	0	0	0	0	0	0	0	0	0	0	0	0	0	0	0	0	0	0	0	0	0	0	0	0	0	0	0	0	0	-0.0051498258627556	0	0	0	0
841	0	0	0	0	0	0	0	-0.000808074278187651	0	0	0	0	0	0	0	0	0	0	0	0	0	0	0	0	0	0	0	0	0	0	0	0	0	0	0	-0.000808074278187651	-0.0016161485563753	0	0	0	0	0	0	0	0	0	0	0	0
842	0	0	0	0	0	0	0.0016887327749257	0	0	-0.00109870791948668	0	0	0	0	0	0	0	0	0	0	0	0	0	0	0	0	0	0	0	0	0	0	0	0	0	0	0	0	0	0	0	0	0	0	0	0	0	0	0
843	0.291407822206667	0.0962463907603465	-0.0227272727272727	-0.0454545454545455	-0.0227272727272727	0.0481231953801732	0.050791845305801	-0.0227272727272727	0.0481231953801732	-0.0227272727272727	-0.0681818181818182	0.192492781520693	0.050791845305801	0.124310963338875	0.195161431446321	0.0481231953801732	0.217888704173593	0	-0.0427858955289177	-0.0227272727272727	-0.113636363636364	0.0735191180330738	-0.113636363636364	0.0026686499256277	0.192492781520693	0	0	-0.0227272727272727	0	-0.204545454545455	0.0026686499256277	-0.0227272727272727	0	0	0.31413509493394	0	0.121642313413247	0	0.147038236066147	0.0962463907603465	-0.0655131682561908	0	-0.0227272727272727	0	0	-0.0227272727272727	0	0	-0.020058622801645
844	0.0229147571035747	0	0	0	0	0	0	0	0	0	0	-0.0421940928270042	0	0	0	0	0	-0.0421940928270042	-0.0843881856540084	0	-0.0843881856540084	0	0	0	0	0	0	0	0	0	0	0	0	0	0	0	0	0	0	0	0	0	0	0	0	0	0	0	-0.0843881856540084
845	0	0	0	0	0	0	0	0	0	0	0	0	0	0	0	0	0	0	0	0	0	0	0	0	0	0	0	0	0	0	0	0	0	0	0	0	0	0	0	0	0	0	0	0	0	0	0	0	0
846	0	0	0	0	0	0	0	0	0	0	0	0	0	0	0	0	0	0	0	0	0	0	0	0	0	0	0	0	0	0	0	0	0	0	0	0	0	0	0	0	0	0	0	0	0	0	0	0	0
847	0	0	0.00410576449334866	0	0	0	0	0	0	-0.00227966990379793	0.00410576449334866	0	0	0	0	0	-0.00683900971139379	0	0	0	0	0	-0.00227966990379793	0	-0.00455933980759586	0.012317293480046	0	0	0	0	0	0	0	0	0.00410576449334866	0.0100376235762481	0	0	0.00821152898669732	0	0	0.00410576449334866	0	0	0	-0.00227966990379793	0.00821152898669732	0	0
848	0	0	0	-0.00138238018219771	0.00322232426249053	0	0	0	0	-0.00138238018219771	0	0	0	0	0	-0.00138238018219771	0	0	0	0.00644464852498107	0	0	0	0	0	0	0.00183994408029282	0	0	0	0	0	0	0	0.00161116213124527	0	-0.00138238018219771	0	0	0	0	0	0	0	0	0	0	0	0
849	0	0	0	0	0	0	0	0	0	0	0	0	0	0	0	0	0	0	0	0	0	0	0	0	0	0	0	0	0	0	0	0	0	0	0	0	0	0	0	0	0	0	0	0	0	0	0	0	0
850	0	0	0	0	0	0	0	0	0	0	0	0	0	0	0	0	0	0	0	0	0	0	0	0	0	0	0	0	0	0	0	0	0	0	0	0	0	0	0	0	0	0	0	0	0	0	0	0	0
851	0	0	0	0	0	-0.0675026153431369	0	0	-0.042571306939123	-0.0212856534695615	0	-0.0036456549344519	0	0.0194628260023355	-0.169050676426416	0	-0.0869654413454725	0	0	0	0	0	0	0	0	0	0	0	-0.0212856534695615	0	0	-0.0212856534695615	0	0	0	0	0	0	0	0	0	0	0	0	0	0	0	0	0
852	0.0163238654913484	-0.00985933234713532	0	0.00816193274567418	0	0	0	0	-0.00901063254640476	0	0	-0.0180212650928095	0	0	0.00816193274567418	0	0	0	0	0	0	0	0	0	0	0	0	0	0.00816193274567418	0	0	0	0	0	0	0	0	0	0	0	0	0	0	0	0	0	0	0	0
853	0	0	0	0	0	0	0	0	0	0	0	0	0	0	0	0	0	0	0	0	0	0	0	0	0	0	0	0	0	0	0	0	0	0	0	0	0	0	0	0	0	0	0	0	0	0	0	0	0
854	0	0	0	0	0	0	0	0	0	0	0	0	0	0	0	0	0	0	0	0	0	0	0	0	0	0	0	0	0	0	0	0	0	0	0	0	0	0	0	0	0	0	0	0	0	0	0	0	0
855	0.0155123042930743	0	0	0	0	0	0	0	0	0	0	0	0	0	0	0	0	0	0	0	0	0	0	0	0	0	0	0	0	0	0	0	0	0	0	0	0	0	0	0	0	0	0	0	0	0	0	0	0
856	0	0	0	0	0	0	0	0	0	0	0	0	0	0	0	0	0	0	0	0	0	0	0	0	0	0	-0.00908347715505495	0	0	0	0	0	0	0	0	0	0	0	0.0116836078981189	0	0	0	0	0	0	0	-0.00908347715505495	0	0
857	0	0	0	0	0	0	0	0	0	0	0	0	0	0	0	0	0	0	0	0	0	0	0.0479829536772121	0	0	0.0347851181222431	0	0	0	0	0	0.0917711838482716	0	0	0	0	0	0	0	0	0	0	0	0	0	0.0611807892321811	0	0	0
858	0	0	0	0	0	0	0	0	0	0	0	0	0	0	0	0	0	0	0	0	0	0	0	0	0	0	0	-0.00184870221104784	0	0	0.00180115273775216	0	0	0	0	0	0	0	0	0	0	0	-0.00184870221104784	0	0	0	0	0	0
859	0	0	0	0	0	0	0	0	0	0	0	0	0	0	0	0	0	0	0	0	0	-0.00438404208680403	0	0	-0.00467611337687252	-0.00438404208680403	0	0	0	0	0	0	0	0	0	-0.00876808417360807	0	0	0	0	0	0	0	0	0	0	0	0	0
860	0	0	0	0.0551495932717496	0	0	0	0.0147911839268426	0.0275747966358748	0.0137873983179374	0	0.0413621949538122	0	0.0137873983179374	-0.0132855055134848	0.0275747966358748	0	0	0	-0.0132855055134848	0.0699407771985922	0	0	0	0.0975155738344674	0.0275747966358748	0	0.0694388843941396	0	0	0.0561533788806548	0	0	0.0137873983179374	0	0.0137873983179374	0	0	-0.0132855055134848	0.0147911839268426	0.0137873983179374	0	0.0275747966358748	0	0	0	-0.0398565165404544	0	0
861	0	0	0	0	0	-0.0228362639872117	0	-0.0456725279744234	0	0	0	0	0	0	0	0	0	0	0	0	0	0	0	0	0	0	0	0	0	0	0	0	0.0314169022934339	0	-0.0228362639872117	0	0	0	0	0	0	0	0	-0.0456725279744234	0	0	0	0	0
862	0	0	0	0	0	0	0	0	0	0	0	0	0	0	0	0	0	0	0	0	0	0	0	0	0	0	0	0	0	0	0	0	0	0	0	0	0	0	0	0	0	0	0	0	0	0	0	0	0
863	0	0	0	0	0	0	0	0	0	0	0.0168435236651507	0	0	0	0	0	0	0	0.0168435236651507	0	0	0	0.0505305709954522	0	0	0	0	0	0	0	0	0	0	0	0	0	0	0	0	-0.00780457348005931	0	0	0	0	0	0	0	0	0
864	0	0	0	0	0	0	0	0	0	0	0	0	0	0	0	0	0	0	0	0	0	0	0	0	0	0	0	0	0	0	0	0	0	0	0	0	0	0	0	0	0	0	0	0	0	0	0	0	0
865	0	0	0	0	0	0	0	0	0	0	0	0	0	0	0	0	0	0	0	0	0	0	0	0	0	0	0	0	0	0	0	0	0	0	0	0	0	0	0	0	0	0	0	0	0	0	-0.259163272861903	0	0
866	0	0	0	0	-0.00100194377091558	0	0	0	0	0	0	0	0	0	0	0	0	0	0	0	0	0	0	0	0	0	0	0	0	0	0	0	0	0	0	0	0	0	0	0	0	0	0	0	0	0	0	0	0
867	0	0	0	0	0	0	0	0	0	0	0	0	0	0	0	0	0	0	0	0	0	0	0	0	0	0	0	0	0	0	0	0	0	0	0	0	0	0	0	0	0	0	0	0	0	0	0	0	0
868	0	0	0	0	0	0	0	0	0	0	0	0	0	0	0	0	0	0	0	0	0	0	0	0	0	0	0	0	0	0	0	0	0	0	0	0	0	0	0	0	0	0	0	0	0	0	0	0	0
869	0	-0.0195102916788606	0	0	0	0	0.0323834196891192	0	0	0	0	0	0	0	0.0323834196891192	-0.0097551458394303	0	0.744417453522795	0.0226282738496889	2.45058235187973	0.0971502590673575	0.381963872600828	0.0323834196891192	0.0971502590673575	0	0	0	0.0323834196891192	0	0.0647668393782383	0.0323834196891192	0.0485751295336788	0	0	0	0	0	0	0	0	0	0	0	0.161917098445596	0	0	0	0	0.0647668393782383
870	0	0.20304993693303	0	-0.0165234633179114	0	-0.0330469266358229	0	-0.0165234633179114	-0.0495703899537343	-0.0330469266358229	0	0	0	-0.0165234633179114	0	-0.0330469266358229	0.0775794225039205	-0.0347262246643684	0	0.0296883305787317	0	0.0313676286072773	0	0	-0.0165234633179114	-0.0330469266358229	0	-0.0165234633179114	0.034456707696824	0	0.0759001244753747	0.0313676286072773	0.067503634332647	0	0	0	0	-0.0347262246643684	0	-0.0165234633179114	0	0	0	0.0627352572145546	-0.0165234633179114	0.0313676286072773	0	-0.0016792980285456	0.0263297345216404
871	0	0	0	0	0.0143328077970474	0	0	0	0	0	0	0	0	0	0	0	0	0	0	0	0	-0.00176472664384287	0	0	0	0	0	0	0	-0.00176472664384287	-0.00529417993152861	0	0	0	0	0.0143328077970474	0	0	0	0	0	0	0	0.0286656155940949	0	0	0	0	0
872	0	0	0	0	0	0	0	0	0	0	0	0	0	0	0	0	0	0	0	0.013667949720619	0	0	0	0	0	0	0	0	0	0	0	0.00762369758829096	0	0	0	0	0	0	0	0	0	0	0	-0.00840724704695447	0	0	0	0	0
873	0.0260688216892596	0	0.0521376433785193	0	0	0.0673898074149936	0	0	0	0	0.0260688216892596	0	0	0.119527450793513	0	0	0	0.0521376433785193	0	0	0	0	0	0	0	0	0	0	0	0	-0.0216333153055706	0	0.0260688216892596	0	0	0	-0.0108166576527853	0	-0.0108166576527853	0	0	0.0521376433785193	0	0	0	0	0	0	0
874	0	-0.0271786359274243	0	0	0	0	0	0	0	0	0	0	0	0	0	0.0805044948342949	-0.00842886041807148	0	0	0	0	0	0	0	0.0854930502219392	0	0	0.0402522474171475	0	0	0	0	0	0	0	0	0	0	0	0	0	0	0	0	0	0	0	0	0
875	0	0	0	0	0	0	0	0	0	0	0	0	0	0	0	0	0	0	0	0	0	0	0	0	0	0	0	0	0	0	0	0	0	0	0	0	0	0	0	0	0	0	0	0	0	0	0	0	0
876	0	0	0	0	0	0	0	0	0	0	0	0	0	0	0	0	0	0	0	0	0	0	0	0	0	0	0	0	0	0	0	0	0	0	0	0	0	0	0	0	0	0	0	0	0	0	0	0	0
877	0	0	0	0	0	0	0	0	0	0	0	0	0	0	0	0	0	0	0	0	0	0	0	0	0	0	0	0	0	0	0	0	0	0	0	0	0	0	0	0	0	0	0	0	0	0	0	0	0
878	0	0	0	0	-0.00961446014806269	0	0	-0.0128192801974169	0	-0.00961446014806269	0	-0.00320482004935423	0	-0.00320482004935423	0	0	0	0	0	0	0	-0.00320482004935423	0	0	-0.00320482004935423	0	0	0	0	0	0	0	0	0	0	0	0	0	0	0	0	0	0	0	0	0	0	0	0
879	0	0	0	0	0	0	0	0	0	0	0	0	0	0	0	0	0	0	0	0	0	0	0	0	0	0	0	0	0	0	0	0	0	0	0	0	0	0	-0.0512832466957272	0	-0.0046621133359752	-0.0139863400079256	0	0	-0.0046621133359752	0	0	-0.05827641669969	0
880	0	0	0	0	0	0	0	0	0	0	0	0	0	0	0	0	0	0	0	0	0	0	0	0	0	0	0	0	0	0	0	0	0	0	0	0	0	0	0	0	0	0	0	0	0	0	0	0	0
881	0	0	0	0	0	0	0	0	0	0	0	0	0	0	0	0	0	0	0	0	0	0	0	0	0	0	0	0	0	0	0	0	0	0	0	0	0	0	0	0	0	0	0	0	0	0	0	0	0
882	0	0	0	0	0	0	0	0	0	0	0	0	0	0	0	0	0	0	0	0	0	0	0	0	0	0	0	0	0	0	0	0	0	0	0	0	0	0	0	0	0	0	0	0	0	0	0	0	0
883	0.00950931913275009	0	0	0	0.00774160151005226	0	0.0369502136661549	0	0.00475465956637505	0	0	0	0	0	0	0	0	0	0	0	0	0	0.0190186382655002	0	0.00475465956637505	0	0	0	0.174835341091032	0	0.00475465956637505	0	0.0739004273323099	0	0	0	0.00950931913275009	-0.00108706286484547	0	0	0	0	0	0	0	0	0	0	0
884	0	0	0	0	0	0	0	0	0	0	0	0	0	0	0	0	0	0	0	0	0	0	0	0	0	0	0	0	0	0	0	0	0	0	0	0	0	0	0	0	0	0	0	0	0	0	0	0	0
885	0	0	0	0	0	0	0	0	0	0	0	0	0	0	0	0	0	0	0	0	0	0	0	0	0	0	0	0	0	0	0	0	0	0	0	0	0.00579777365491651	0	0	0	0	0	0	0	0	0	0	0	0
886	0	0	0	0	0	0	-0.0082223318533136	0	-0.0082223318533136	0	0.020165355918532	0	0	0	0	0	0	0	0	0	0.020165355918532	0	0	0	0	0	0	0	0	0	0	0.0403307118370639	0	0	0	0	0	0	0	0	0	0	0	0	0	0	0	-0.0493339911198816	0
887	0	0	0	0	0	0	0	0	0	0	0	0	0	0	0	0	0	0	0	0.000737637200519297	0	0	0	0	0	0	0	0	0	0	-0.00029085832291091	0	0	0	0	0	0	0	0	0	-0.00029085832291091	0	0.000737637200519297	0	0	0	0	0	0
888	0	0	0	0.0415097508894681	0	0	0	0	0	0.0205380981721093	0	0	0.000433554545249602	0	0	0	0	0	0	0	0	0	0	0	0	0	0	0	0	0	0	-0.0201045436268597	0	0	0	0	0	0	0	0	0	0	0	0	0	0	0	0	0
889	0	0	0	0	0	0	0	0	0	0	0	0	0	0	0	0	0	0	0	0	0	0	0	0	0	0	0	0	0	0	0	0	0	0	0	0	0	0	0	0	0	0	0	0	0	0	0	0	0
890	0	0	0.00177566276612746	0	-0.00122803354987658	0	0	0	0	0	0	0	0	0	0.00177566276612746	-0.00122803354987658	0	0	0	0	0	0.00177566276612746	0	0	0	0	0	0	0	-0.00122803354987658	0	0	0	0	0.00177566276612746	0	-0.00245606709975317	0	0.00177566276612746	0	0.00109525843250174	-0.00368410064962975	0.00532698829838237	0.00355132553225491	0.00532698829838237	-0.00122803354987658	0.00177566276612746	0.00355132553225491	-0.00368410064962975
891	0	0	0	0	0	0	0	0	0	0	0	0	0	0	0	0	0	0	0	0	0	0	0	0	0	0	0	0	0	0	0	0	0	0	0	0	0	0	0	0	0	0	0	0	0	0	0	0	0
892	0	0	0	0	0	0	0	0	0	0	0	0	0	0	0	0	0	0	0	0	0	0	0	0	0	0	0	0.117405341943058	0	0	0	0	0	0	0	0	0	0	0	0	0	0	0	0	0	0	0	0	0
893	-0.000699863526612311	0	0	0	0	0	0.0045178851779482	0	0	0	0	0	0	0	0	0	0	0	0	0	0	0	0	0	0	0	0	0	0	0	0	0	0	0	0	0	0	0	0	0	0	0	0	0	0	0	0	0	0
894	0	0	0	0	0	0	0	0	0	0	0	0	0	0	0	0.0351975284606386	0	0	-0.00807297973682086	0	0	0	0	0	0	0	0	0	0.000968536504451698	0.0342289919561869	0	-0.0161459594736417	-0.0242189392104626	0	0	0.026156012219366	0	0	0	0.0171144959780934	0	0	0	0	0	-0.00807297973682086	0	0	0
895	0	0	0	0	0	0	0	0	0	0	0	0	-0.00658457891617831	0	0	0	0	0	0	0	0	0	0	0	0	0	0	0	0	0	0	0	0	0	0	0	0	0	0	0	0	0	0	0	0	0	0	0	0
896	0	0	0	0	0	0	0.0213857998289136	0	0	0	0	0	0	0	0	0	0	0	0	0	0	0	0.0427715996578272	0.0046829436405054	0	0.0427715996578272	0	0	0.0213857998289136	0	0	0	0	0	0	0	0	0	0	0	0	0	0.026068743469419	0.0213857998289136	0	0	0	-0.0167028561884082	0
897	0	0	0	0	0	0	0	0	0	0	0	0	0	0	0	0	0	0	0	0	0	0	0	0	0	0	0	0	0	0	0	0	0	0	0	0	0	0	0	0	0	0	0	0	0	0	0	0	0
898	0	0	0	0	0	0	0	0	0	0	0	0	0	0	0	0	0	0	0	0	0	0	0	0	0	0	0	0	0	0	0	0	0	0	0	0	0	0	0	0	0	0	0.018796992481203	0	0	0	0	0	0
899	0	0	0	0	0	0	0	0	0	0	0	0	0	0	0	0	0	0	0	0	0	0	0	0	0	0	0	0	0	0	0	0	0	0	0	0	0	0	0	0	0	0	0	0	0	0	0	0	0
900	0	0	0	0	0	0	0	0	0	0	0	0	0	0	0	0	0	0	0	0	0	0	0	0	0	0	0	0	0	0	0.00292654375182909	0	0	0	0	0	0	0	0	0	0	0	0	0	0	0	0	0	0
901	0	0	0	0	0.00222222222222222	0	0	0	0.00222222222222222	0	0	0.0133333333333333	0	0	0	0	0.022848123822616	0	0	0.0133333333333333	0.0155555555555556	0.00222222222222222	0	0	0.00222222222222222	0	0	0	0.0117370127115049	0	0	0	0	0	0	0	0	0	0	0	0	0	0	0	0	0	0	0	0
902	0	0	0	0	0	0	0	0	0	0	0	0	0	0	0	0	0	0	0	0	0	0	0	0	0	-0.00608902149424587	0	0	0	0	0	0	0	0	0	0	0	0	0	0	0	0	0	0	0.00866250866250866	0	0	0	0
903	0	0	0	0	0	0	0	0	0	0	-0.0158152775581211	0.016655562958028	0	0	0	0	0	0	0	0	0	0	0	0	0	0	0	0	0	0	0	0.016655562958028	0	0	0	0	-0.00790763877906057	0	0	0	0	0	0	0	0	0	0	0	0
904	-0.155957579538366	-0.00352502048303731	-0.0173582681953552	-0.124766063630692	0.045024763619991	0	-0.0623830318153462	-0.0485497841030283	0	-0.124766063630692	-0.0173582681953552	-0.0311915159076731	-0.0935745477230193	-0.0623830318153462	0	-0.0311915159076731	0	-0.0935745477230193	-0.142124331826048	0.117716022664618	0	-0.187149095446039	-0.079741300010701	-0.0311915159076731	0	0	0	0	0	0	-0.0311915159076731	-0.124766063630692	0	0	0	-0.0623830318153462	-0.0311915159076731	0	-0.0311915159076731	0	0	-0.0311915159076731	-0.187149095446039	-0.124766063630692	0	-0.0311915159076731	-0.0935745477230193	0	-0.0311915159076731
905	0.000933889931732646	0	0	0	0	0	0	0	0	0	0	0	0	0	0	0	0	0	0	0	0	0	0	0	0	0	0.000933889931732646	0	0	0	0	-0.00115924556298761	0	0	0	0	0.00186777986346529	-0.00231849112597522	0	0	0	0	0	0	0	0	0	0	0
906	0	0	0	0	0	0	0	0	0	0	0	0	0	0	0	0	0	-0.0431965442764579	0	0	0	0	0	0	0.0832639467110741	0	0	0	0	0	0	0	0	0	0	0	0	0	0	-0.0431965442764579	0	0	0	0	0	0	0	0	0
907	0	0.0010479865558296	0	0	0	0	-0.0262246159565934	0	0	0	0	0	0.0618811109156531	0	0	0	-0.0566411781365052	0.0293685756240822	0	0.0010479865558296	0	0.0293685756240822	0	0	0	0	0	0	0	0.0293685756240822	0	0	0	0	0.0293685756240822	0	0	0	0	0	0	0	0	0	0	0	0	0	0
908	0	0	0	0	0	0	0	0	0	0	0	0	0	0	0	0	0	0	0	0	0	0	0	0	0	0	0	0	0	0	0	0	0	0	0	0	0	0	0	0	0	0	0	0	0	0	0	0	0
909	0	0	0.00937207122774133	0.0187441424554827	-0.0252365930599369	0.0468603561387067	0	0	0	0	0	0	-0.0126182965299685	0	0	0	0	0.0061258459255142	0	0	-0.0126182965299685	0	-0.0126182965299685	0	-0.0126182965299685	0	0	0	-0.0126182965299685	0	0	0	0	0	0	0	-0.0252365930599369	0	0.00937207122774133	-0.0126182965299685	0	0	0	0	-0.0284828183621641	0	0	0	0
910	0	0	0	0	0	0	0	0	0	0	0	0	0	0.00955383586509984	0	0	0	0	0	0	0	0	0	0	0	0	0	0	0	0	0	0	0	0	0	0	0	0	0	0	0	0	0	0	0	0	0	0	0
911	0	0.0169412561941468	-0.00463596115064556	0	0	0	0	0.0084706280970734	0	0.00615264752175062	0.08802553569318	0	-0.00231798057532278	0	0.0042353140485367	0	0.0084706280970734	0.0072686867907468	0	0.000715392166887301	0	0.0042353140485367	-0.00231798057532278	0	0.000715392166887301	0	0.0461878074317948	0.044499316986029	0.457156211129972	0.0042353140485367	0	0	0	0.0919749677614803	0.0042353140485367	0	0	0	0.0334818652861847	0	0	0	0.0415518462811493	0.0127059421456101	0	0	0	0	0
912	0	0	0	0	0	0	0	0	0	0	0	0	0	0	0	0	0	-0.00276755320621039	0	0	0	0	0	-0.00553510641242078	0	-0.000863082491658311	0	0	-0.00276755320621039	0	0	0	-0.00276755320621039	0	0	0	0	0.0186880956830499	0	0	0	0	0	0	0	0	0	0	0
913	0	0	0	0	0.00604997277512251	0	0	0	0	0	0	0	0	0	0	0	0	0	0	0	0	0	0	-0.00447587503356906	0	0	0	-0.00447587503356906	0	-0.00447587503356906	0	0	0	0	0	0	-0.00447587503356906	0	-0.00447587503356906	0	0	0	-0.00447587503356906	0	0	0	0	0	0
914	0	0	0	0	0	0	0	0	0	0	0	0	0	0	0	0	0	0	0	0	0	0	0	0	0	0	0	0	0	0	0	0	0	0	0	0	0	0	0	0	0	0	0	0	0	0	-0.00688420762770205	0	-0.00688420762770205
915	0	0	0	0	0	0	0	0	0	0	0	0	0	0	0	0	0	0	0	0.01963137025272	0	0	0	0	0	0	0	0	0	0	0	0	0	0	0.00414628078613484	0	0	0	0.00829256157226967	0	0	0	0	0	0	0	0	0	0
916	0.000564636990012088	0	0	0	0	0	0	0	0	0	0	0	0.000352933155208824	0	-0.00105851917401632	0	0	0.00197608931923723	0.00289393975606829	0	0	0	0	0	0	0	0	0	0	0	-0.000211703834803264	0	0	0	0	0	0	0	0	0	0	0	0	0	0	0	0	0	0
917	0	0	0	0	0	0	0	0	0	0	0	0	0	0	0	0	0	0	0	0	0	0	-0.00260348867482426	0	0	0	0	0	0	0	0	0	0	0	0	0	0	0	0	0	0	0	0	0	0	0	0	0	0
918	0.00447187192558805	0	0	0	0.00223593596279403	0	0	0	0	0	0	0	0	0	0	0	0	0	0	0	0	0	0	0	0	0	0	0	0	0	0	0	0	0	0	0	0	0	0	0	0	0	0	0	0	0	0	0	0
919	0	0	0	0	0	0	0	0	0	0	0	0	0	0	0	0	0	0	0	0	0	0	0	0	0	0	0	0	0	0	0	0	0	0	0	0	0	0	0	0	0	0	0	0	0	0	0	0	0
920	0	0.0957781534704613	0.0438308130615823	0	0	0	-0.0357142857142857	0	0	0	-0.0357142857142857	0	0	0	0	0	0	0	0	0	0	0	0	0	0	0	0	0	0	0	0	0	-0.0357142857142857	0	0	0	0	0	0	0	0	0.0219154065307911	0	-0.0357142857142857	0	-0.0178571428571429	0	0	0
921	0	0	0	0	0	0	0	0	0	0	-0.00860215053763441	0	0	0	0	0.00732708089097304	0	0	0	0	0	0	0	0	0	0	0	0	0	0	0	0	0	0	0	0	0	0	0	0	0	0.0146541617819461	0	0	0	0	0	0	0
922	0	0	0	0	0	0	0	0	0	0	0	0	0	0	0	0	0	0	0	0	0	0	0	0	0	0	0	0	0	0	0	0	0	0	0	0	0	0	0	0	0	0	0	0	0	0	0	0	0
923	0	0	0	0	0	0	0	0	0	0.187617260787992	0.0380050589654248	0	-0.111607142857143	0	0	0	0	-0.0558035714285714	0	0	0	0	-0.0558035714285714	0	0	0.187617260787992	0	-0.111607142857143	0	-0.0558035714285714	0	0	0	0	0	0.0380050589654248	0	0	0	0	0	0.0938086303939962	0	0	0	0	0	0	0
924	0	-0.0014445230907016	0	0.0430659188794841	0	0	0	-0.0014445230907016	0	0	0	0	0	0	0	0	0	0	0	0	0	0	0.00594591368411179	0	0	0	0	0	0	0	0	0	0	0	0.0592913155198125	0	0	-0.00288904618140321	0	0	0	0	0	0	0	-0.00288904618140321	0	0	0
925	0	0	0	0	0	0	0	0	0	0	0	0	0	0	0	0	0	0	0	0	0	0	0	0	0	0	0	0	0	0	0	0	0	0	0	0	0	0	0	0	0	0	0	0	0	0	0	0	0
926	0	0	0	0	0	0	0	0	0	0	0	0	0	0	0	0	0	0	0	0	0	0	0	0	0	0	0	0	0	0	0	0	0	0	0	0	0	0	0	0	0.033101621979477	0	0	0	0	0	0	0	0
927	0	0	0	0	0	0	0	0	0	0	0	0	0	0	0	0	0	0	0	0	0	0	0	0	0	0	0	0	0	0	0	0	0	0	0	0	0	0	0	0	0	0	0	0	0	0	0	0	0
928	0	0	0	0	0	0	0	0	0	0	0	0	0	0	0	0	0	0	0	0	0	0	0	0	0	0	0	0	0	0	0	0	0	0	0	0	0	0	0	0	0	0	0	0	0	0	0	0	0
929	0	0	0	0	0	0	0	0	0	0	0	0	0	0	0	0	0	0	0	0	0	0	0	0	0	0	0	0.00036646630910464	0	0	0	0	0	0	0	0	0	0	0	0	0	0	0	0	0	0	0	0	0
930	0	0	0	0.028563014036042	-0.00793084304861607	0.022212350066637	-0.00793084304861607	0.0666370501999111	-0.0158616860972321	0	0.0142815070180209	0	0.022212350066637	-0.00793084304861607	0	0.0063506639694049	-0.00793084304861607	0	0	0	0.0428445210540629	0	0.036493857084658	0	0	-0.0158616860972321	0	0	0	0	-0.0158616860972321	-0.0317233721944643	-0.0158616860972321	0	0	0	-0.00793084304861607	0	0	0	0	0	0	0	0	0	0	0	0
931	0	0	0	0	0	0	0	0	0	0	0	0	0	0	0	0	0	0	0	0	0	0	0	0	0	0	0	0	0	0	0	0	0	0	0	0	0	0	0	0	0.00533560986020702	0	0	0	0	0	0	0	0
932	0	0	0	0	0	0	0	0	0	0	0	0	0	0	0	0	0	0	0	0	0	0	0	0	0	0	0	0	0	0	0	0	0	0	0	0	0	0	0	0	0	0	0	0	0	0	0	0	0
933	-0.16008537886873	-2.77481323372465	-0.16008537886873	-0.266808964781217	0	-0.196561363423492	-0.0533617929562433	-0.106723585912487	0	-0.16008537886873	-0.106723585912487	0	0	-0.0533617929562433	0	-0.106723585912487	0	0	0	0	0	-0.0533617929562433	0	0	-0.0533617929562433	0	0	0	0	0	0	0	-0.0533617929562433	0	-0.106723585912487	0	0	0	0	0	0	-0.106723585912487	0	0	0	0	0	0	0
934	0	0	0	0	0	0	0	0	0	0	0	-0.00330371006640457	-0.00660742013280914	0.00853752241099633	-0.00330371006640457	0	0	0	0	-0.0198222603984274	0.0170750448219927	0	-0.00330371006640457	0	-0.0145884480538357	0	0	-0.0165185503320229	0	-0.0495556509960686	0	-0.0126583457756485	-0.0495556509960686	-0.00330371006640457	-0.083409864958362	-0.00660742013280914	-0.0165185503320229	0	-0.0145884480538357	-0.00330371006640457	0.00853752241099633	0	0	-0.00991113019921372	0	0	0	0	0
935	0	0	0	0	0	0	0	0	0	0	0	0	0	0	0	0	0	0	0	0	0	0	0	0	0	0	0.00673809042517351	0	0	0	0	0	0	0	0.00673809042517351	0	0	0	0	0	0	0	0	0	0	0	0	0	0
936	0	0	0	0	0	0	0	0	0	0	0	0	0	0	0	0	0	0	0	0	0	0	0	0	0	0	0	0	0	0	0	0	0	0	0	0	0	0	0	0	0	0	0	0	0	0	0	0	0
937	0.0466853408029879	0	0	0	0	0	0.0466853408029879	0	0	0	-0.0273822562979189	0	0	0	0	0	0	0	0	0	0	0	0	0	0	0	0	0	0	0	0	0	0	0	0	0	0	0	0	0	0	0	0	0	0	0	0	0	0
938	0	0.167180969943431	0	0	-0.0260824204486176	0	0.642641459325106	0.082827167310878	0.0276090557702927	0.115016129046196	0.0015266353216751	0	0	0	0	0	0	0	0	0.0276090557702927	0	0	0	0	0	0	0	0	0	0	0	0	0	0	0	0	0	0	0	0.0582713821839357	0	0	0	0	0	0	0	0	0
939	0.00761788679820218	0.0535965217749157	0	0	0.0152357735964044	0	0	0	0	0	0	0	0	0.00761788679820218	-0.0149644594089039	0	0	0	0	0	0	0	0	0	0	0	0	0	0	-0.00748222970445193	0	0.103780526657888	0.00761788679820218	0	-0.00748222970445193	-0.06340601162131	0	-0.0148288023151536	0	0	-0.0149644594089039	0	0	0	-0.0219040607383548	0	0	0	0.0459786349767135
940	0	0	0.5420054200542	0	0	0	0	0.2710027100271	0	0	0	0	0	0.995200893394368	0	0	0	0	0	-0.088809946714032	0	0	0	0	0	0	0	0	0	0	0	0	0	0	0	0	0	0	0	0	0	0.2710027100271	0	0	0	0	0	0	0
941	0	0	0	0	0	0	0	0	0	0	0	0	0	0	0	0	0	0	0	0	0	0	0	0	0	0	0	0	0	0	0	0	0	0	0	0	0	0	0	0	0	0	0	0	0	0	0	0	0
942	0	0	0.00281880708084339	0	0.0046511971242917	0	0.00563761416168677	0	0	0	0	0	0	0	0	0	0	0.00845642124253016	0	0.0046511971242917	0.00549717013034495	0	0.00747000420513509	0	0	0	0.00281880708084339	0	0	0	0	0	0	0	-0.00098641703739507	0.00084597300605325	0	0	0	0	0	0	0	-0.00098641703739507	0	0	0	0	0
943	0	0	0	0	0	0	0	0	0	0	0	0	0	0	0	0	0	0	0	0	0	0	0	0	0	0	0	0	0	0	0	0	0	0	0	0	0	0	0	0	0	0	0	0	0	0	0	0	0
944	0	-0.117508813160987	0.170657855713853	0.0867302688638335	-0.0587544065804935	0	0	-0.293772032902468	0.0867302688638335	-0.0587544065804935	-0.176263219741481	-0.117508813160987	0.173460537727667	0.0867302688638335	0	0.05595172456668	0	-0.0587544065804935	0	0.173460537727667	-0.207041764038635	0	0	-0.176263219741481	-0.0587544065804935	-0.293772032902468	-0.235017626321974	0.2601908065915	-0.0587544065804935	0	-0.117508813160987	-0.0587544065804935	0	0	0.173460537727667	0	-0.176263219741481	0	0.0867302688638335	0.2601908065915	-0.176263219741481	-0.0587544065804935	0	-0.176263219741481	0	-0.0895329508776475	-0.0587544065804935	0	0
945	0	0	0	0	0	-0.00537316640696362	0	0	0	0	0	0	0	0	0	0	0	0	0	0	0	0	0	0	0	0	0	0	0	0	0	0	0	-0.00268658320348181	0	0	0	0	0	0	0	0	0	0	0	0	0	0	0
946	0	0	0	0	0	0	0	0	0	0	0	0	0	0	0	0	0	0	0	0	0	0	0	0	0	0	0	0	0	0	0	0	0	0	0	0	0	0	0	0	0	0	0	0	0	0	0	0	0
947	0	0	0	0	0	0	0	0	0	0	0	0	0	0.164880461665293	-0.0554938956714761	0	0	0	0	0	0	0	0	0	0	0	0	0	0	0	0	0	0	0	-0.0554938956714761	0	0	0	0	0	0	0	0	0	0	0	0	0	0
948	0	0	0	0	0	0	0	0	0	0	0	0	0	0	0	0	0	0	0	-0.00195641115936925	0	0	0	0	0	0	-0.00782564463747701	0	0	0.0132068992841861	0	0	-0.00195641115936925	0	0	0.00332634855430517	0	-0.00391282231873851	0	0	0.00860910826797955	0	0	0	0	-0.00322785362127055	0	0	0
949	0	0	0	0	0	0	0	0	0	0	0	0	0	0	0	0	0	0	0	0	0	0	0	0	0	0	0	0	0	0	0	0	0	0	0	0	0	0	0	0	0	0	0	0	0	0	0	0	0
950	0	0	0	0	0	-0.00258819266506199	0	0	0	0	0	0	0.00377799017170908	0	0	0.00636618283677107	0	0	0	0	0.0035693925199413	0	0	0	0	0	0	0	0	0.00377799017170908	0	0	0.00636618283677107	-0.00258819266506199	0	0	0	0	0	0	0	0.0127323656735421	0	0	0	0	0.0177001533518983	0	0
951	0	0	0	0	0	0	0	0	0	0	0	0	0	0	0	0	0	0	0	0	0	0	0	0	0	0	0	0	0	0	0	0	0	0	0	0	0	0	0	0	0	0	0	0	0	0	0	0	0
952	0	0	0	0	0	0	0	0	0	0	0	0	0	0	0	0	0	0	0	0	0	0	0	0	0	0	0	0	0	0	0	0	0	0	0	0	0	0	0	0	0	0	0	0	0	0	0	0	0
953	0	0	0	0	0	0	0.00482020630482985	0	0	0	0	0	0	0	0	0	0	0	0	0	0	0	0	0	0	0	0	0	0	0	0	0	0	0	0	0	0	0	0	0	0	0	0	0	0	0	0	0	0
954	0	0	0	0	0	0	0	0	0	0	0	0	0	0	0	0	0	0	0	0	0	0	0	0	0	0	0	0	0	0	0	0	0	0	0	0	0	0	0	0	0	0	0	0	0	0	0	0	0
955	0	0	0	0	0	0	0	0	0	0	0	0	-0.012134449702706	0	0	0	0	0	0	0	0	0	0	0	0	0	0	0	0	0	0	0	0	0.0196540880503145	0	0	0	0	0	0	0	0	0	0	0	0	0	0	0
956	0	0	0	0	0	0	0	0	0	0	0	0	0	0	0	0	0	0	0	0	0.0201267988326457	0	0	0	0	0	0	0	0	0	0	0	0	0	0	0	0	0	0	0	0	-0.0546896363139185	0	0.0100633994163228	0	0	0	0	0
957	0	0	0	0	0	0	0	0	0	0	0	0	0	0	0	0	0	0	0	0	0	0	0	0	0	0	0	0	0	0	0	0	0	0	0	0	0	0	0	0	0	0	0	0	0	0	0	0	0
958	0	0	0	0	0	-0.149363645541956	0	0	-0.0162654521795706	0	-0.0680363846441025	0	-0.0108436347863804	0	0	-0.0444292080624217	-0.0054218173931902	0	0	-0.0650618087182824	0	-0.0162654521795706	-0.0108436347863804	0	0	0	0	0	0	0	-0.0108436347863804	0	0	0	0	-0.0054218173931902	0	0	0	-0.0054218173931902	0	0	0	0	0	0	-0.0696183880194531	0	0
959	0	0	0	0	0	0	0	0	0	0	0	0	0	0	0	0	0	0	0	0	0	0	0	0	0	0	0	0	0	0	0	0	0	0	0	0	0	0	0	-0.0080948718986522	0	0	0	0	0	0	0	0	0
960	0	0	0.0197434580569339	0	0.00375826819001804	-0.00140307554158716	0.473141877446354	0.0103728877005673	0.00235519264843088	0.18149959093978	0.00375826819001804	0	0.305071482775632	0.00375826819001804	0	0	0	0	0	0	0	0.0422930671970422	0.00751653638003608	0	0.0258569188953828	0	0	0	0	0	0.00235519264843088	0	0	0	0	0	0	0	0	0.00375826819001804	0.0512628793560223	-0.00140307554158716	0	0	0	0	-0.00140307554158716	0	0
961	0	0	0	0	0	0	0	0	0	-0.00168438073742189	0	0	0	0	0	0	0	0	0	0	0	0	0	-0.00336876147484377	0	0	0	0.00168421052631579	0	0	0	0	0	0	0	0	0	0	0	0	0	0	0	0	0	0	0	0	0
962	0	0	0	0	0	0	0	0	0	0	0	0	0	0	0	0	0	0	0	0	0	0	0	0	0	0	0	0	0	0	0	0	0	0	0	0	0	0	0	0	0	0	0	0	0	0	0	0	0
963	-0.0050945030312293	0	0	0	0	0	0	0	0	0	0	0	0	0	0	0	-0.0101890060624586	0	0	0	0	0	0	0	0	0	0	0	0	0.0119033448399	0	0	0	0	0.0238066896798	0	0	0	0	0	0	0.00595167241995001	0	0	0.00595167241995001	0	0	0	0
964	0	0	0	0	0	0	0	0	0	0	0	0	0	0	0	0	0	0	0	0	0	0	0	0	0.00709018718094158	0	0	0	-0.00791514959632737	0	0	0	0	-0.0158302991926547	0	0	0	0	0.00544026235017	0	0	0	0	0	0.00626522476555583	0	0	0	0.00709018718094158
965	0	0	0	0.00738416097470925	0	0	0	0	0	0	0	0	0	0	0	0	0	0	0	0	0	0	0	0	0	0	0	0	0	0	0	0	0	0	0	0	0	0	0	0	0	0	0	0	0	0	0	0	0
966	0	0	0	0	0	0	0	0	0	0	0	0	0	0	0	0	0	0	0	0	0	0	0	0	0	0	0	0	0	0	0	0	0	0	0	0	0	0	0	0	0	0	0	0	0	0	0	0	0
967	0	0	0	0	0.00921064750851985	0	0	0	0	0	0	0	0	0	0	0	0	0	0	0	0	0	0	0	0	0	0	0	0	0	0	0	0	0	0	0	0	0	0	0	0	0	0	0	0	0	0	0	0
968	0	0	0	0	0	0	0.00625195373554236	-0.00562208354416147	0	0	0	0	0	-0.0168662506324844	0	0	0	-0.0405675770136255	0	0	0	0	0	0	0	0	0	0	0	0	0	0	0	0	0	0	0	-0.0112441670883229	0	0	0	0	0	0	0	0	0	0	0
969	0	0	0	0	0	0	0	0	0	0	0	0	0	0	-0.00111691909038109	0	0	-0.00111691909038109	0.00112690023552215	0	0	0	0	0	0	0.0022538004710443	0	0	-0.00223383818076219	0	0	0.0022538004710443	0	0	0	0	-0.00111691909038109	0	0	-0.00111691909038109	0	0	0	-0.00335075727114328	-0.00111691909038109	0	0	0	0
970	0	0	0	0	0	0	0	-0.00170584422230562	0	0	0	0	0	0	0	0	0	0	0	0	-0.00170584422230562	0.00951927653498334	0	0	0	0	0	0	0	-0.00341168844461124	0	0	0	0	0	0	0	0	0	0	-0.00170584422230562	0	0	0	0	0.00475963826749167	0	0	0
971	0	0	0	0.00358667192711883	0	0	0	0	-0.00176853423882286	0	0	0	0	0	0	0	0	0	0	0	0	0	0	0	0	0	0	0	0.00358667192711883	0	0	0	0	0	0	0	0	0	0	0	0	0	-0.00176853423882286	0	0.00358667192711883	0.00717334385423765	0	-0.00353706847764573	0
972	-0.0258531540847983	-0.0517063081695967	0	0	0	0.0090996596167047	0.0699056274030059	0	0	0	0	0	-0.0517063081695967	0.034952813701503	0	-0.0258531540847983	0	-0.0517063081695967	0	0.034952813701503	0	0	0	0	0	0	0	0	0	-0.0258531540847983	0	0	0	0	0	0	0	0	0	0	0	-0.077559462254395	0	0	0	0	-0.0258531540847983	0	0.034952813701503
973	0	0	0	-0.00639488409272582	0	-0.00319744204636291	0	-0.00319744204636291	0	0	0.0198137507430157	0.0132091671620104	0	0	0	0	0	-0.00319744204636291	0	0	0.0132091671620104	0.010221424603927	0	-0.00639488409272582	0	0	0	-0.00319744204636291	0	0	0	0	0	0	0	0	0	0	0	-0.00319744204636291	0	-0.00959232613908873	-0.00319744204636291	0	0	0	0	-0.00319744204636291	0
974	0	0.0113584734211722	0	0	0	0	0	0	0	-0.00910912734560029	0	0	0	0	0	0	0	0	0	0	0	0	0	0	0	0.0136078194967441	0	0	0	-0.0182182546912006	0	0.0227169468423444	-0.00910912734560029	0	-0.0182182546912006	0.0113584734211722	0	0.0113584734211722	0	0	-0.00910912734560029	-0.0182182546912006	0	0	0	0	-0.00910912734560029	0.0227169468423444	0
975	0	0	0	0	0	0	0	0	0	0	-0.0477099236641221	0	0	0	0	0	0	0	0	0	0	0	0	0	0	0	0	0	0	0	0	0	0	0	0	0	0	0	0	0	0	0	0	0	0	0	0	0	0
976	0	0	0	0	0	0	0	-0.00695216907675195	0	0	0	0	0	0	0	0	0	0	0	0	0	0	0	0	0	0	0	0	0	0	0	0	0	0	0	0	0	0	-0.00695216907675195	0	0	0	0	0	0	0	0	0	0
977	0	0	0	0	0	0	0	0	0	0	0	0	0	0	0	0	0	0	0	0	0	0	0	0	0	0	0	0	0	0	0	0	0	0	0	0	0	0	0	0	0	0	0	0	0	0	0	0	0
978	0	0	-0.0080006400512041	0	0	0	0	-0.117420064733642	-0.0080006400512041	0	0	0	0	0	0	-0.299638769391196	0	0.0012947680172101	0	0	0	0	0	-0.0160012801024082	0.0105901760856243	0	0	0	0	0	0	0.0092954080684142	0	0	0.0012947680172101	0	0	0	0	0	0	0	0	0	-0.080006400512041	0	0	-0.132126576818839	0
979	0.330469266358229	0.0196901409746619	0.059070422923986	0.260863697912753	0.108985850394799	0.128675991369461	-0.0731172836193053	-0.030225286496152	0	0.0428919971231538	-0.0696055684454756	-0.165924708213273	-0.185614849187935	0.108985850394799	0	0	0	-0.0232018561484919	0	0	0.175079703666445	0	0	0	0	0	0	0	-0.0232018561484919	0	0	0	0	0	0	0	0	0	-0.0232018561484919	0	0	-0.0232018561484919	0	0	0	0	0	-0.0232018561484919	0
980	0	0	0	0	0	0	0	0	0	0	0	0	0	0	0	0	0	0	0	0	0	0	0	0	0	0	0	0	0	0	0	0	0	0	0	0	0	0	0	0	0	0	0	0	0	0	0	0	0
981	0	0	0	0	0	0	0	0	0	0	0	0	0	0	0	0	0	-0.0203334688897926	0	-0.0203334688897926	0	0	0	0	0	0	0	0	0	0	0	0.021978021978022	0	-0.0186889158015632	0	0	0	0	0	-0.0101667344448963	0	0	0	0	0	0	0	0	0
982	-0.045045045045045	0	0	-0.631076621175635	0.123762376237624	0	-0.011372758897511	0	0	0	0	0	0	0	0	0	0	0	0	-0.135135135135135	0	0	0	-0.045045045045045	0	-0.135135135135135	0	0.326242083667826	0	0	0	0	0	-0.0900900900900901	0	0	0	0	0	0	0	0	0	0	0	0	0	0	0
983	0	0	0	0.0214270409256482	0	0	-0.0489596083231334	0	0	0.0214270409256482	0	0	0	0	0	0	0	0	0	0	0	0	0	0	0	0	0	0	0	0	0	0	0	0	0	0	0	0	0	0	0	0	0	0	0	0	0	0	0
984	0	0	0	0	0	0	0	0	0	0	0	0	0	0	0	0	0	0.0179953212164837	0	0	0	0	0	0	0	0	0	0	0	0	0	0	0	0	0	0.0179953212164837	0	0	0	0	0	0	0	0	0.0179953212164837	0	0	0	0
985	0	0	0	0	-0.0133014099494546	0	0	0	0	0	0	0	0	0	0	0	0	0	0	0	0	0	0	0	0	0	0	0	0	0	0	0	0	0	0	0	0	0	0	0	0	0	0	0	0	0	0	0	0
986	0	0	0	0	0.00982318271119843	0	0.0040172953520661	0	-0.00520969002344361	-0.0104193800468872	0	0.00982318271119843	0	-0.00520969002344361	0.00982318271119843	-0.00520969002344361	0	0	0	0	0	0	0	0	0	0	0.0392927308447937	0	0	0	0	0	0	0	0	0	0	0	0	0	0	0	0	0	0	0	0	0	0
987	0	0	0	-0.0107480653482373	0.0112069931637342	0	0	0	0	0	0	-0.0107480653482373	0.0112069931637342	0	0	0	0	0	-0.0107480653482373	0	0	0.0224139863274683	-0.0107480653482373	0	-0.0214961306964746	0	0	0	-0.0214961306964746	0	0	0	-0.0214961306964746	-0.0107480653482373	0	0	0	-0.0107480653482373	-0.032244196044712	0	0	0	0	0	0	0.000458927815496901	0	0	0
988	0	0	0	0.00454318295397756	0	0	0	0	0	0	0	0	0	0	0	0	0	0	0	0	0	0	0	0	0	0	0	0	0	0	0	0	0	0	0	0	0	0	0	0	0	0	0	0	0	0	0	0	0
989	0	0	0	0	0	0	0	0	0	0	0	0	0	0	0	0	0	0	0	0	0	0	0	0	-0.00169339406973397	0	0	0	0	0	0	0	0	0	0	0.0712961642663625	0	0	0	0	0	0	0	0	0	0	0	0	0
990	0	0	0	0	0	0	0.0558659217877095	0	0	0	0	0	0	0	0	0	0	0	0	0	0	0	0	0	0	0	0	0	0	0	0	0	0	0	0	0	0	0	0	0	0	0	0	0	0	-0.0230733733271804	0	0	0
991	0	-0.00458358161067058	0	0	0	0	0	0.0021572340280217	-0.219195925466297	-0.000538227109254399	0	0	0	-0.00458358161067058	0	0	0	0.00674081563869228	0	0	0	0	0	0	0	0	0	0	0	0	0	0	0.00674081563869228	0	0	0	0	0	0	0	0	-0.00458358161067058	0	0	-0.00458358161067058	0	0	0	0
992	-0.151285930408472	-0.680786686838124	0.078440239726427	0	-0.151285930408472	0	0	-0.075642965204236	0	0	0	0	0	0	-0.075642965204236	0	0	0.154083204930663	0	0	0	0	0	0.154083204930663	0	0	0	0	0	0	0	0	0	0	0	0	0	0	0	0	0	0	0	0	0	0	0	0	0
993	-0.0315457413249211	-0.00788643533123028	0	-0.27011691332182	0.00645459435470122	0	-0.0315457413249211	-0.0236593059936909	0.46127560066069	0.0702733074531281	-0.313275721903457	-0.0014318409765291	-0.010022886835704	0	0	0	-0.301820994091224	0	0.527162905501667	0.0243865364422756	0.0286820593718629	-0.129024027332102	0	-0.0630914826498423	-0.00788643533123028	0	0.0143410296859315	0.011499967653513	0	0	0	-0.0315457413249211	0.0286820593718629	-0.00788643533123028	-0.0157728706624606	0	-0.124023893874571	0	-0.0093182763077594	0	0.0143410296859315	-0.00788643533123028	0	0	-0.0157728706624606	0	-0.084569097297779	0	0.081068664578697
994	0	0	0	0	0	0	0	0	0	0	0	0	0	0	0	0	0	0	0	0	0	0	0	0	0	0	0	0	0	0	0	0	0	0	0	0	0	0	0	0	0	0	0	0	0	0	0	0	0
995	0	0	0	0	0	0	0	0	0	0	0	0	0	0	0	0	0	0	0	0	0	0	0	0	0	0	0	0	0	0	0	0	0	0	0	0	0	0	0	0	0	0	0	0	0	0	0	0	0
996	0	0	0	0	-0.0403958796202787	0	0	0	0	0	0	0	0	0	0	0	0	0	0	0	0	0	0	0	-0.0201979398101394	0	0	0	0	0	0	0	0	0	0	0	0	0	0	0	0	0	0	0	-0.0201979398101394	0	0	0	0
997	0	0	0	0	0.0445235975066785	0	0.106326373511842	0	0	0	0	0	0	0	0	0	0	0	0	0	0	0	0	0	0	0	0	0	0	0	0	0	0	0	0	0	0	0	0	0	0	0	0	0	0	0	0	0	0
998	0	-0.00603791812583021	0	-0.082164828547041	-0.0120758362516604	-0.0218675506816559	0.021703743895822	0	-0.00603791812583021	0	-0.0181137543774906	0	0	0	0	0	0	0	0	0	0	0	0	0	0	-0.00603791812583021	0	0.010851871947911	0	0.010851871947911	-0.0120758362516604	0	0	0	0	0	0	0	0	0	0	0	0	0	0	-0.0230096115924882	-0.00603791812583021	0	0
999	0	-0.0018772292096865	0	0	0	0	0	0.00324306794227339	0	0	0	0	0	0	0	0	0	0	0	-0.0018772292096865	0	-0.0018772292096865	0	0	0	0	0	0	0	0	0	0	0	0	0	0	0	0	0	0	0	0	0	0	0	0	0	0	0
1000	0	0	0	0	0	0	0	0	0	0	0	0	0	0	0	0	0	0	0	0	0	0	0	0.00853533629224991	0	0	0	0	0	0.0170706725844998	0	0	0	0.00853533629224991	0	0	0	0.00853533629224991	0	0.00853533629224991	0	0	0	0.0256060088767497	0	0.00853533629224991	0	0	0
1001	0.000445577756673789	-0.00392349190779794	0	0	-0.00588523786169691	0.107178287755628	0	-0.00392349190779794	0	0.00414628078613484	0	0.000891155513347501	0	0.0209541928090111	0	0.00218453483223587	0	0	0	0.0165851231445393	0	0	0	0	0	-0.00392349190779794	0	0	0	0	0	0	0	0	0	0	0	0	0.000891155513347501	0.00414628078613484	0.0063308156183707	0	0.00414628078613484	0	0	0	0	0	0
1002	0.0460352169409598	-0.0144791138782307	0	-0.00723955693911533	0	0	0.01150880423524	-0.00723955693911533	0	0.0200472988274892	-0.00723955693911533	0	0	-0.00723955693911533	0	0	0	0	0	0	-0.00723955693911533	0	0	0	0	0.01150880423524	0	-0.021718670817346	0	0	0	0	0	0	0	0	0	0.01150880423524	0	0	0	0	0	0	0	0	0	0	0
1003	0	0	0	0	0	0	0	0	0	0	0	0	0	0	0	0	0	0	0	0	0	0	0	0	0	0	0	0	0	0	0	0	0	0	0	0	0	0	0	0	0	0	0	0	0	0	0	0	0
1004	0	0	0	0	0	0	0	0	0	0	0	0	0	0	0	0	0	0	0	0	0	0	0	0	0	0	0	0	0	0	0	0	0	0	-0.00634276290752252	0	0	0	0	0	0	0	0	0	0	0	0	0	0
1005	0	-0.0142816338189089	0	0	0	0	-0.0285632676378178	0	-0.0142816338189089	0	-0.0285632676378178	0.010590874517393	0	0	0	0.0249687890137328	0	0	0	0	0	0	0	0	0	0	0	0	0	0	0	0	0	0	0	0	0	0	0	0	0	0	0	0	0	0	0	0	0
1006	0	0	0	0	0	0	0	0	0	0	0	0	0	0	0	0	0	0	0	0	0	0	0	0	-0.0089541547277937	0	0	0	0	0	0	-0.0089541547277937	0	0	0	0	0	0	0	0	-0.20379353843373	-0.0268624641833811	0	0	0	0	-0.0361626924168692	0.0111061750333185	0
1007	-0.0188412623645784	-0.126397448646954	-0.190022531688568	-0.331379762837788	0.0298240381747689	-0.0565237870937353	0.00549138790509519	-0.0188412623645784	-0.0227705056417725	0	0	0.00549138790509519	0	0	0	0.0298240381747689	0.0894721145243066	-0.00942063118228921	-0.0188412623645784	0.0204034069924797	-0.012640447267855	-0.0282618935468676	0	0.0149120190873844	0.043126149219371	0.0219655516203808	0.0149120190873844	0	0	0	0	0.0141070650659929	0.0086156771608977	-0.0023670986492928	0	0	0	0	0	0	0	0	0	0	0	0	0	0	0
1008	0	0	0	0	0	0	0	0	-0.00886210563629919	0	0	0	0	0	0	0	0	0	0	0	0	0	0	0	0	0	0	0	0	0	0	0	0	0	0	0	0	0	0	0	0	0	0	0	0	0	0	0	0
1009	0.019238264937889	-0.032440873139056	-0.285237944625899	0.168784951544114	-0.194681202592095	-0.0747733433031124	-0.000473001596595399	0.0920117105813467	0.108741112505228	0.0049457985125	-0.028004039980909	-0.029967973882806	0.029566899801727	-0.136200223374027	-0.070809511741561	-0.224212138636064	0.168820915301872	-0.096777690305058	-0.49537339938312	-0.216829404625072	-0.219667414204647	-0.085539016005788	-0.380668557656686	-0.57778669574728	-0.021567309163108	-0.091430817711478	0.0824797511339301	-0.140637056532173	-0.014693540506469	-0.016693438166124	0.217482225010456	-0.015202505860822	-0.159839357712305	0.14714571486549	0.029602863559484	-0.081066219089883	-0.268981544298612	-0.158276497891488	-0.29909337321245	-0.032877910977894	0.176676650909459	0.055642969638497	-0.113141981905617	-0.0142565026676312	-0.0639357430849221	-0.0378596732481519	-0.00538283635133799	0.067935538404231	0.098957406753502
1010	0	0	0	0	0	0	0	0	0	0	0	0	0	0	0	0	0	0	0	0	0	0	0	0	0	0	0	0	0	0	0	0	0	0	0	0	0	0	0	0	0	0	0	0	0	0	0	0	0
1011	0	0	0	0	0	0	0	0	0	0	0	0	0	-0.00413450937155458	0	0	-0.0018470995044181	0	0	0	0	0	0.00917825881972742	0.0357751758511099	-0.00137816979051819	0	0	0.0853606689585829	0	0.107851695969593	-0.00137816979051819	0.0119345984007638	-0.00137816979051819	0	0	0	0	0.121633393874775	0.0541603128417463	-0.00137816979051819	0	0	0.019734687429973	0	0.00642191923869103	0	-0.00137816979051819	0	0
1012	0	0	0	0	0	0	0	0	0	0	0	0	0	0	0	0	0	0	-0.0255885363357216	0	0	0	0	0	0	0	0	0	0	0	0	0	0	0	-0.0511770726714432	0	0	0	-0.0255885363357216	-0.0511770726714432	0	0	0	0	0	0.0265111346765642	0	0	0
1013	0	0	0	-0.00534725122071618	0	0.0138411055298189	0	0	0	0	0	0	0.00660589245607082	0	0	0	0	0	0.00660589245607082	0.0613409939576693	0	0	0	0	-0.0059765718383935	0	0	0	0	0	0	0	0	0	0	0.0157290673828509	0.0132117849121416	0	0	0	0.167672489990644	0.0132117849121416	0	0	0	-0.0059765718383935	0	0	0
1014	0	0	0	0	0	-0.00427222625710258	0	0	0	0	0	0	0	-0.00427222625710258	0	0	0	0	0	0	0	0	0	0	0	0	0	0	0	0	0	0	0	0	0	0	0	0	0	0	0	0	0	0	0	0	0	0	0
1015	0	0	0	0	0	0	0	0	0	0	0	0	0	0	0	0	0	0	0	0	0	0	0	0	0	0	0	0	0	0	0	0	0	0	0	0	0	-0.0065483596359112	0	0	0	0	0	0	0	0	0	0	0
1016	0	0	0.194931773879142	0	0	0	0	0	-0.0459558823529412	0	0	0	0	0	0	0	0	0	0	0	0	0	0	0.0974658869395711	-0.0459558823529412	0	0	0	0	0	0	0	0	0	0	0	0	0	0	0	0	0	-0.0459558823529412	0	0	0	0	0	0
1017	0	0	0.0285836787194512	0	0	0	0	0.00490216799822325	0	0	0	-0.00375586854460094	0	0	0	0	0	0	0	0	0	0	0	0.0285836787194512	0	0	0.0173160730856484	0	0	0	0	0	0	0	0	0	0	0	0	0	0	0	0	-0.00938967136150235	0	0.138430890233977	-0.00187793427230047	0	0
1018	0	0	0	0	0	0	0	0	0	0	0	0	0	0	0	0	0	0	0	0	0	0	0	0	0	0	0	0	0	0	0	0	0	0	0	0	0	0	0	0	0	0	0	0	0	0	0	0	0
1019	0	0	0	0	0	0	0	0	0	0	0.196569879252184	0.0736377025036819	0	0	0	0	0	0	0	0	0	0	0	-0.0203873598369011	0	0	0.0368188512518409	0	0.122932176748502	0	0	0.110456553755523	0	0.184094256259205	0.0532503426667808	0.618008734437373	-0.0407747196738022	3.93686974458751	0.593665506178511	0.443042250476281	0.69498678124423	-0.0651179479326651	-0.0203873598369011	0.0328629828298797	0.294550810014728	0	0	0	-0.223044922751724
1020	0	0	0	0	0	0	0	0	0	0	0	0	0	0	0	0	0	0	0	0	0.043308791684712	0	0	0.0674971244784106	0	0	0	0	0	0	0	0	0	0	0	0	0	0	0	0	0	0	0	0	0	0	0	0	0
1021	0	0	0	0	0	0	0	0	0	0	0	0	0	0	0	0	0	0	-0.00750694392312889	-0.00375347196156445	0	0	0	0	0	0	0	0	0	0	0	0	0	0	-0.00375347196156445	0	0	0	0	0	0	0	0	0	0	0	0	0	0
1022	0	0	0	0	0	0	0	0	0	0	0	0	0	0	0	0	0	0	0	0	0	0	0	0	0	0	0	0	0	0	0	0	0	0	0	0	0	0	0	0	0	0	0	0	0	0	0	0	0
1023	-0.105615208590037	0	0	0.0460617227084293	-0.0176025347650062	0	0	0	0	-0.0176025347650062	0	0	0	-0.0176025347650062	0	0	0.0460617227084293	0	-0.0176025347650062	0	0	0	0	0	0	0	0	0	0	0	0	0	-0.0176025347650062	0	0	0	0	0	0	0	0	0	0	0	0	0	0.0921234454168586	0	0
1024	0	0	0	0	0	0	0	0	0	0	0	0	0	0	0	0	-0.0195503421309873	0	0	0.017531556802244	0	0.017531556802244	0	0.00775638573675035	0	0	0	0	0	0	0	0	0	0	0	0	0	0	0	0	0.017531556802244	0	0	0	0	0	0	0	0
1025	0	0	0	0	0	0	0	0	0	0	0	0	0	0	0	0	0	0	0	0	0	0	0	0	0	0.0213356091316407	0	0	0	0	0	0	0	0	0	0	0	0	0	0	0	0	0	0	0	0	0	0	0
1026	0	0	0	0	0	0	-0.00830771786990114	0	0	0	0	0	0	0	0	0	0	0	0	0	0	0	0	0	0	0	0	0	0	0	0	0	0	0	0	0	0	0	0	0	0	0	0	0	0	0	0	0	0
1027	0	0	0	0	0	0	0	0	0	0	0	0.0020703933747412	0	0	0	0	0	-0.00119353106164588	0	0	0	0	0	0	0	0	0	0	0	-0.00238706212329176	0	0	0	0	0	0	0	0	0	-0.0038972619334882	0	0	0	-0.00238706212329176	0	-0.00031666874855056	0	-0.00119353106164588	0
1028	0	0	0	0	0	0	0	0	0	0	0	0	0	0	0	0	0	0	0	0	0	0	0	0	0	0	0	0	0	0	0	0	0	0	0	0	0	0	0	0	0	0	-0.0015749146479885	0	0	0	-0.0405157246168358	0	-0.058411214953271
1029	0	0	0	0	0	0	0	0	0	0	0	0	0	0.573244721383581	0	0	0.0775193798449612	0	0	0	0	0	0	0	-0.0414765657403567	0	0	0	0	0	0	0.0775193798449612	0	0	0	0	0	0	0	0	0	0	0	0	0	0	0	0	0
1030	0	0	0	0	0	0	0	0	0	0	0	0	0	0	0	0	0	0	0	0	0	0	0	0	0	0	0	0	0	0	0	0	0	0	-0.0652322120309614	0	0	0.0083891180170403	0	-0.126559392514916	-0.0180799132164166	0.0529380624669137	0.0697162985009939	0	-0.0180799132164166	0	0	2.04549476606133	0.0961853297344509
1031	0	0	0	0	0	0	0	0	0	-0.00850593288818951	0	-0.0127588993322843	0	0	0	0	0	0	0	0	0	0	0	0	0	0	0	0	0	0	0	0	-0.00425296644409476	0	0	0	0	0	0	0	0	-0.00425296644409476	0	-0.00425296644409476	0	0	0	0	0
1032	0	0.0148920327624721	0	-0.0017165040254369	0	0	0	0	0	0	0.0114590247115982	0	0	0	0.138621303472099	0	0	0	0	0	0	0	0	0	0.0297840655249442	0	0	0	0.087635692549396	0	0.205055450623735	0	0	0	0	0.0131755287370352	0	0	-0.0515421143891638	0	0	0	0	0	-0.02231455233068	-0.016608536787909	-0.033217073575818	0	0
1033	0	0	0	0	0	0	0	0	0	0	0	0	0	-0.0578034682080925	-0.115606936416185	0	0.0472385485986305	0	-0.115606936416185	0.257322582212075	0	0	0	-0.0578034682080925	0	0	0	0.105042016806723	0	-0.0578034682080925	0	0	0.105042016806723	0	-0.0578034682080925	0	0	0	0	0	0	0	0	0	0	0	0	0	0
1034	0	0	0	0	0	0	0	0	0	0	0	0	0	0	0	0	-0.000867806965018701	0	0	0	0	0	0	0	0	0.0017703262086382	0	-0.000867806965018701	0	0	0	-0.0026034208950561	0	0	0	0	0	0	0	0	0.0292277385818298	-0.000867806965018701	-0.00909461699339597	0	-0.000867806965018701	0	-0.0026034208950561	0	0
1035	0.00222951756392725	0	0	0	0	0.0596979284818817	0	0.00596979284818817	0	0	0	0	0	0	0.0119395856963763	0	0	0	0	0	0	0	0	0	0	0	0	0	0	0	0	0	0	0	0	0	0	0	0	0	0	0	0	0	0	0	0	0	0
1036	0	0	0	0	0	0	0	0	0	0	0	0	0	0	0	0	0	0	0	0	0	0	0	0	0	0	0	0	0	0	0	0	0	0	0	0	0	0	0	0	0	0	0	0	0	0	0	0	0
1037	0	0	0	0	-0.0120641814452889	0	0	0	0	-0.0120641814452889	0	0	0	0	0	0	0	0	-0.0120641814452889	0	0	0	0	0	-0.0241283628905779	0	0	0	0	0	0	0	0	0	0	0	0	0	0	0	0	0	0	0	0	0	0	0	0
1038	0	0	0	0	0	0	0	0	0	0	0	0	0	0	0	0	0	0	0	0	0	0.0156298843388559	0	0	0	0	0	0	0	0	0	0	0	0	0	0	0	0	0	0	0	0	0	0	0	0	0	0	0
1039	0	0	0	0	0	0	0	0	0	0	0	0	0	0	0	0	0	0	0	0	0	0	0	0	0	0	0	0	0	0	0	0	0	0	0	0	0	0	0	0	0	0	0	0	0	0	0	0	0
1040	0	0	0	0	0	0	0	0	0	0	0	0	0	0	0	0	0	0	0	0	0	0	0	0	0	0	0	0	0	0	0	0	0	0	0	0	0	0	0	0	0	0	0	0	0	0	0	0	0
1041	0	0	-0.00419392719342392	0.0105990308170505	0	0	0	0	0	0.00634799720688123	0	0	0	0	-0.00209696359671196	0	0	0	0	-0.00209696359671196	0	-0.00209696359671196	0	0	0	-0.00209696359671196	0	0	0	0	0	0	0	0	0	0	0	0	0	0	0	0	-0.00209696359671196	0	0.0105990308170505	0	0	0	0
1042	0	0	0	0	0	0	0	0	0	0	0	0	0	0	0	0	0	0	0	0	-0.0482625482625483	0	0	0	0	0	0	0	0	0	0	0	0	0	0	0	0	0	0	0	0	0	0	0	0	0	0	0	0
1043	0	0	-0.00069887163593133	0	-0.0153247961787644	-0.00357980275286832	-0.0015335676567991	0	-0.00178990137643416	0.0162800015343308	0.0574827979538035	0.00576186223387399	0.017285586701622	0	0	0.0364465193528898	0	0	0.10170234987515	-0.00715960550573663	0	0.169874176275833	0.00576186223387399	0	0.014404655584685	0	0	0	0	-0.00357980275286832	0	0	0	0	0	0.0176777448061935	0.00109102974050283	0	0	-0.00715960550573663	0	0	0.00109102974050283	0	-0.00178990137643416	0.19423392390998	0.00109102974050283	0	0
1044	0	0	0	0	0	0	0	0	0	0	0	0	0	0	0	0	0	0	0	0	0	0	0	0	0	0	0	0	0	0	0	0	0	0	0	0	0	0	0	0	0	0	0	0	0	0	0	0	0
1045	-0.082419562110421	0	0	0	0.235849056603774	0	0	0	0	-0.063653723742839	0	0	0.471698113207547	0	0	0	0	0	0	0	0	0	0	0	0	0	0	0	0	0	-0.063653723742839	0	0	0	0	0	-0.063653723742839	0	0	0	0	0	0	0	0	0	0	0	0
1046	0	0	0	0	0	0	0	0	0	0	0	0	0	-0.00333222259246918	0	0	0	0	0	0	0	0	0	0	0	0	0	0	0	0	0	0	0	0	0	0	0	0	0	0	0	-0.00999666777740753	0	0	0	0	0	0	0
1047	-0.00375699740767179	0	0	0	0	0	0	-0.00751399481534358	0	0	0	0	0	0.00630437523641407	0	0	0	0	0	0	0	0	0	0	0	0	0	0	0	0	0	0	0	0	0	0	0	0	0	0	0	0	0	0	0	0	0	0	0
1048	0.102132802198975	0	0	0	-0.0154348607824818	0	0	0	0	0	0	-0.0121713729308666	0	-0.0121713729308666	0	0	-0.0243427458617332	0	0	0	-0.0121713729308666	0	0.0089078850792514	0	0	0	0	0	0	0.0510664010994875	0	0.0421585160202361	0	0.040393359069048	0.126475548060708	0.021079258010118	0	0	0	0	0	0.17427846130858	0.021079258010118	0	0	0.0267236552377543	-0.0121713729308666	0	0
1049	0	0	0	0	0	0	0	0	0	0	0	0	0	0	0	0	0	0	0	0	0	0	0	0	0	0	0	0	0	0	0	0	0	0	0	0	0	-0.0792657403481305	0	0	0	0	-0.0053584824777623	0	0	0	0	0	0
1050	0.0355239786856128	0	0	0	0	0.123345809303234	0	0	0.106571936056838	0	0	0.186006830051262	0	0.0355239786856128	0	0	0	0	0	0	0	0	0.142095914742451	0	0	-0.0187501054392176	0	0	0	0	0.0355239786856128	0	0	0.0710479573712256	0	0	0	0	0	0	0	0	0	0	0	0	0	0	0
1051	0	0	0	0	0	0	0	0	0	0	0	0	0	0	0	0	0	0	0	0	0	0	0	0	0	0	0	0	0	0.00197168658070113	0	0	0	0	0	0	0	0	0	0	0	0	0	0	0	0	0	0	0
1052	0	0	0	0	0	0	0	0	0	0	0	0	0	0	0	0	0	0	0	0	0	-0.0352733686067019	0	0	0	0	0	0	0	0	0.070871722182849	0	0	0	-0.0352733686067019	0	0	0	0	0.000162492484722596	0	0	0	0	0	0	0	0	0
1053	0	0	0	-0.011768859597505	0	0	0	0	0	0	0	0	0	-0.011768859597505	0	0	0	0	0	0	0	0	0	0	0	0	0	0	0.0211999152003392	0	0	0	0	0	0	0	0.0211999152003392	0	0	0	0	0	0	-0.035306578792515	0	0	0	-0.011768859597505	0
1054	0	0	0	0	0	0	0	0	0	0	0	-0.0262398320650748	0	0	0	0	0	0	0	0	0	0	0	0	0	0	0	0.783867762869795	0	0	0	0	-0.0262398320650748	0.166112956810631	0.0553709856035437	0	0	0	0	0	0	0.0553709856035437	0	0	0	0	-0.0787194961952244	0	0
1055	0	0	0	0	0	0	0	0	0	0	0	0	0	0	0	0	0	0	0	0	0	0	0	0	0	0	0	0	0	0	0	0	0	0	0	0	0	0	0	0	0	0	0	0	0	0	0	0	0
1056	0	0	0	0	0	0	0	0	0	0	0	0	0	0	0	0	0	0	0	0	0	0	0	0	0	0	0	0	0	0	0	0	0	0	0	0	0	0	0	0	0	0	0	0	0	0	0	0	0
1057	0	0	0	0	0	0	0	0	0	0	0	0	0	0	0	0	0	0	0	0	0	0	0	0	0	0	0	0	0	0	0	0	0	0	0	0	0	0	0	0	0	0	0	0	0	0	0	0	0
1058	0	0	0	0	0	0	0	0	0	0	0	0	0	0	0.00922424130615257	0	0	0	0	0	0	0	0	0	0	0	0	0	0	0	0	0	0	0	0	0	0	0	0	0	0	0	0	0	0	0	0	0	-0.0143051283885273
1059	0	0	-0.0172176308539945	0	0	0	0	0	0	0	0	0	0	0	0	0	0	0	0	0	0	0	0	0	0	0	0	0	0	0	0	-0.0172176308539945	0	0	0	0	0	0	0	0.0266880170803309	0	0	-0.0172176308539945	0	0.0800640512409928	0	0	0	0
1060	0	0	0	0	-0.00830771786990114	0	0	0	0	0	0	0	0	0	0	0	0	0	0	0	0	0	-0.00830771786990114	0	0	0	0	0	0	0	0	0	0	0	0	0	0	0	0	0	0	0	0	0	0	0	0	0	0
1061	0	0	0	0	0	0	0	0	0	0	-0.00229489386115892	0	0	0	0	0	0	0	0	0	0	0	0	0	0	0	0	0	0	0	0	0	0	0	0	0	0	0	0	0	-0.00229489386115892	0	0	0	0	0	0	0	0
1062	0	0	0	0	0	0	0	0	0	0	0	0	0	0	0	0	0	0	0	0	0	0	0	0	0	0	0	0	0	0	0	0	0	0	0	0	0	0	0	0	0	0	0	0	0	0	0	0	0
1063	0	0	0	0	0	0	0	0	-0.000613071919466873	0	0	0	0	0	0	0	0	0	0	0	0	0	0	0	0	0	0	0	0	0	0	0	0	0	0	0	0	-0.000306535959733436	0	0	0	0	0	0	0	0	0	0	0
1064	0	0	0	0	0	0	0	0	0	0	0	0	0	0	0	0	0	0	0	0	0	0.0173480653583205	0	0.00392884904055337	0	0	0	0	0	0	0	0	0	-0.00949036727721363	-0.0055615182366603	0	0	0	0.0268384326355341	0	0	0	0	0.013419216317767	0	0	0	0.013419216317767	0
1065	0	0	0	0	0	0.00234367676010125	0	0	0	0.00117183838005062	0	0	0	0	0	0	0	0	0	0	0	0	0.00117183838005062	0	0.00117183838005062	0	0	0	0.00234367676010125	0	0	0	0	0	0	0	0	0	0	0	0	0	0	0	0	0	0	0	0
1066	0	0	0	0	0	0	0	0	0	0	0.0284010224368077	0	0	0	0	0	0	0	0	0	0	0	0	0	0	0	0	0	0	0	0	0	0	0	0	0	0	0	0	0	0	0	0	0	-0.0225250591282802	0	0	0	0
1067	0	0	0	0	0	0	0	0	0	0	0	0	0	0	0	0	0	0	0	0	0	0	0	0	0	0	0	0	0	0	0	0	0	0	0	0	0	0	0	0	0	0	0	0	0	0	0	0	0
1068	0	0	0	-0.0204750204750205	0	-0.00682500682500682	0	0	0	-0.00455000455000455	0	0	-0.0890901472296822	-0.0204750204750205	-0.00227500227500228	0	0	-0.0113750113750114	0	0.00645994832041344	0	-0.0590654079026172	-0.00682500682500682	0	-0.100830217109287	-0.00455000455000455	-0.0367650949046298	0	0	0.0125548381362335	0	0	-0.00682500682500682	0	0	-0.0477750477750478	0	0	0	0	-0.00036505850459338	-0.00227500227500228	0	0	0	0.00645994832041344	0	0	0
1069	0	0	0	0	0	0	0	0	0	0	0	0	0	0	0	0	0	0	0	0	0	0	0	0	0	0	0	0	0	0	0	0	0	0	0	0	0	0	0	0	0	0	0	0	0	0	0	0	0
1070	0	0	0	0	0	0	0	0	0	0	0	0	0.00476803509273828	0	0	0	0	0	0	0	0	0	0	0	0	0	0	0	0	0	0	0	0	0	0	0	0	0	0	0	0	0	0	0	0	0	0	0	0
1071	0	0	0.00746157289956723	0	0	-0.00791389680278569	0	0	-0.0158277936055714	0	0	0	0	-0.00791389680278569	0	0	0	0	0	-0.0237416904083571	0	0	0	0	-0.00836622070600417	0	0	0	0	0	-0.00791389680278569	0	0	0	0.00746157289956723	0	0	-0.0237416904083571	-0.0158277936055714	0	0	0	0	0	-0.0158277936055714	0	0	0	0
1072	0	0	0	0	0	0	0	0	0	0	0	0	0	0	0	0	0	0	0	0	0	0	0	0.396510705789056	0	0	0	0	0	0	0	0	0	0	0	0	0	0	0	0	0	0	0	0	0	0	0	0	0
1073	0	0	0	0	0	0.0120315225891837	0	0	0	0	0	0	0	0	0	0	0	0	0	0	0	0	0	0	0	0	0	0	0.00601576129459183	0	0	0	0	-0.00485271994953171	0	0	0	0	0	0	0	0	0	0	0	-0.00970543989906343	0	0	0
1074	0	0	0	0	0	0	0	0	0	0	0	0	0	0	0	0	0	0	0	0	0	0	0	0	0	0	0.104042388028694	0	0	0	0	0	0	0	0	0	0	0	0	0	0	0	0	0	0	0	0	0	0
1075	0.0322258061625335	0	-0.0303771015677337	0	0	0	-0.075018401621935	0	0	0	0	0	0.25595290938395	-0.0419996027299838	-0.052566392026851	-0.0116225011622501	0.450105574410086	0	0	0.168261130055901	0	-0.0232450023245002	0.282503659854859	0	0	0	0	0.097073914852309	0	0	0.0138677021217584	0	0.0299806052030252	0	0	0	0	0	0	0	0	0	0	0	0	0	0.0138677021217584	-0.0116225011622501	0
1076	-0.000327204787660453	0	0	0	0	0	0	0	0	0	0	0	0	0	0	0	0	0	0	0	0	0	0	0	0	0	0	0	0	0	0	0	0	0	0	0	0	0	0	0	0	0	0	0	0	0	0	0	0
1077	0	0.0171252426076036	0	0	0	0	0	0	0	0	0	0.00570841420253454	0	0	0	0	0	0	0	0	0	0	0	0	0	-0.00376095377787807	0	0	0.0114168284050691	0	0	0	0	-0.0018134933532216	0	0	0.00570841420253454	0	-0.00376095377787807	0	0	0	0	-0.00752190755575614	0.00570841420253454	0	0	0	-0.00376095377787807
1078	0	-0.0154886674583097	0	0	0	-0.00516288915276989	0	0	-0.00516288915276989	0	0	0	0	0	-0.0206515566110796	0	0	0	0	0	0	0	0	0	0	-0.0309773349166193	0	0	0	-0.0516288915276989	0	0	-0.0154886674583097	0	0	-0.00516288915276989	-0.0619546698332387	0	0	-0.144560896277557	0	-0.00516288915276989	0	-0.00516288915276989	0	0	0	-0.0154886674583097	-0.0103257783055398
1079	0	0.0302758630100637	0.0447027268663388	0.0894054537326777	0	0.0447027268663388	-0.0183891136447223	0.0447027268663388	0	0.0223513634331694	-0.0735564545788893	-0.0183891136447223	0.0670540902995083	0.0933677035211247	0	-0.147112909157779	0	-0.0183891136447223	0	0	0.0223513634331694	-0.0183891136447223	0	0.0447027268663388	0.0223513634331694	0.0447027268663388	-0.0183891136447223	0	0	0.0039622497884471	0	0	0	-0.0367782272894446	0.061973861317641	0.0039622497884471	0.05658947623168	0.0223513634331694	0	-0.0367782272894446	0	0.0263136132216165	0	0	-0.055167340934167	0	0	0.0223513634331694	0
1080	0	0	0	0	0	0	0	0	0	0	0	0	0	0	0	0	0	0	0	0	0	0	0	0	0	0	0	0	0	0.00471664740702309	0	0	0	0	0	0	0	0	0	0	0	0	0	0	0	0	0	0	0
1081	0	0	0	0	0	0	0	0	0	0	0	0	0	0	0	0	0	0	0	0	0	0	0	0	0	0	0	0	0	0	0	0	0	0	0	0	0	0	0	0	0	0	0	0	0	0	0	0	0
1082	0	0	0	0	0	0	0	0	0	0	0	0	0	0	0	0	0	0	0	0	0	0	0	0	0	0	0	0	0	0	0	0	0	0	0	0	0	0	0	0	0	0	0	0	0	0	0	0	0
1083	0	0	-0.000495670319756923	0	0.00324764951366449	0	0	0	0	0	0	0	0	0	0	0	0	0	0	-0.000495670319756923	0	0	0.00112815443707532	0	0	-0.000495670319756923	0	0.00162382475683224	0	0	0	0	0.00112815443707532	0	0.000632484117318394	0	0	0	0	0	-0.000495670319756923	0	0.00162382475683224	0	0	-0.000495670319756923	0	0.00162382475683224	0
1084	0	0	0	0	0	0	0	0	0	0	0	0	0	0	0	0	0	0	0	0	0	0	0	0	0	0	0	0	0	0	0	0	0	0	0	0	0	0	0	0	0	0	0	0	0	0	0	0	0
1085	0	0	0	0	0	0	0.0090892564988184	0	0	0	0	0	-0.0125219133483596	0	0	0.035752668970371	0	0	0.0181785129976368	0	0	-0.0159545701979009	0	0	0.011917556323457	0	0	0	0	0.0363570259952736	-0.0125219133483596	-0.00626095667417982	0	0	0	0	0	0.0090892564988184	0	-0.0222155268720807	0	0	0	0	0	0	0	0	0.0181785129976368
1086	0	0	0	0	0	0	0	0	0	0	0	0	0	0	0.0564865373752589	0	0	0.018828845791753	0	0	0	0	0	0	0	0	0.0376576915835059	0	0	0	0	0	0	0	0	0	0	0	0	0	0	0.0941442289587648	0	0	0	0	0	0	0
1087	-0.00302288322602098	0	0	0	0	0	0	0	0	0	0	0	0	0	0	0	0	0	0	0	0	0	0	0	0	0	0	0	0	0	0	0	0	0	0	0	0	0	0	0	0	0	-0.00302288322602098	0	0	0	0	0	0
1088	0	0	0	0	0	0	0	0	0	0	0	0	0	0	0	0	0	0	0	0	0	0	0	0	0	0	0	0	0	0	0	0	0	0	0	0	0	0	0	0	0	0	0	0	0	0	0	0	0
1089	0	0	0	0	0	0	0	0	0	0	0	0	0	0	0	0	0	0	0	0	0	0	0	0	0	0	0	0	0	0	0	0	0	0	0	0	0	0	0	0	0	0	0	0	0	0	0	0	0
1090	0	0	0	0	0	0	0	0	0	0	0	0	0	0	0	0	0	0	0	0	0	0	0	0	0	0	0	0	0	0	0	0	0	0	0	0	0	0	0	0	0	0	0	0	0	0	0	0	0
1091	0	0	0	0	0	0	0	0	0	0	0	0	0	0	0	0	0	0	0	0	0	0	0	0	0	0	0	0	0	0	0	0	0	-0.00337091908108746	0	0.0760194860165841	0.00431694141984042	-0.0151691358648936	0	0	0	0	0	0	0	0	0	0	0
1092	0	0	0	-0.00400256163944925	0	0	0	-0.00400256163944925	0	0	-0.0080051232788985	0	0	0	0	0	0	0	0	0	0.00765245001556245	0	-0.0080051232788985	0	0	0	0	0	0	0	0	-0.0080051232788985	0	0	0	0	0	0	0	0	0	0	0	0	0	0	0	0	0
1093	0	0	0	0	0	0	0	0	-0.00805152979066022	0	0	0	0	0	0	0	0	0	0	0	0	0	0	0	0	0	0	0	0	0	0	0	0	0	0	0	0	0	0	0	0	0	0	0	0	0	0	0	0
1094	0	0.0356379187455453	0	0	0	0	0	0	0	0	0	0	0	0	0	0	0	0	0	0	0	0	0	0	0	0.0356379187455453	0	0	0	0	0	0	0	0	0	0	0	0	0	0	0	0	0	0	0	0	0	0	0
1095	0	0.0189089533894299	0	0	0	0	0	0	0	0	0	0	0	0	0	0	0	0	0	0	0	0	0	0	0	0	0	0	0	0	0	0	0	0	0	0	0	0	-0.00455933980759586	0	0	0	0	0	0	0	0.00489513688711909	0	0
1096	0	0	0	0	0	0	0	-0.00329511005667589	0	0	0	0	-0.00329511005667589	0	0	-0.0131960630321876	0	0	0	0	-0.00329511005667589	0	-0.00329511005667589	-0.00988533017002768	0	0	0	-0.00659022011335179	0	0	0	0	-0.00988533017002768	0	0	0	0	0	0	-0.0230657703967313	0	-0.00659022011335179	-0.00329511005667589	0.128228081711647	-0.00329511005667589	-0.00988533017002768	-0.00329511005667589	0	0
1097	-0.0592417061611374	0	0	0	0	0	0	0	0	0	0	0	0	0	0	0	0	0	0	0	0	0	0	0	0	0	0	0	0	0	0	0	0	0	0	0	0	0	0	0	0	0	0	0	0	0	0	0	0
1098	0	0	0	0	0	0	0.00249159088077738	0	0	0	-0.00157304431265829	0	0	0	0	0	0	0	0	0	0	0	0	0	0	0	0	0	0	0	0	0	0	0	0	0	0	0	0	0	0	0	0	0	0	0	0	0	0
1099	-0.00640204865556978	-0.0128040973111396	0	0	0	0	0	0	0	0	0	0	0.0312304809494066	0	0	0	0	-0.00640204865556978	0	0	0	0	0.0312304809494066	0	0	0	-0.0128040973111396	0	0	0	0	-0.00640204865556978	0.0156152404747033	0	0	0	0	0	0	0	0	0	0	0	0	0	0	0	0
1100	0	0	0	0	0	0	0	0	0	0	0	0	0	0	0	0	0	0	0	0	0	0	0	0	-0.069856793573175	0	0	0	0	-0.174641983932937	0	0.0305250305250305	0	-0.069856793573175	0	0	0	0	-0.0349283967865875	-0.0481384955712584	0	0	0	0	0	0	0	0	0
1101	0	0	0	0	0	0	0	0	0	0.0107009095773141	0	0	0	0	0	0	0	0	0	0	0.0107009095773141	-0.008911067545892	0	0	0	0.0107009095773141	0	0	0	0.0214018191546281	0	0	0	0	0	0	0	0	0	0	0	0	0	0	0	0	0	0	0
1102	0	0	0	0	0	0	0	0	0	0	0	0	0	0	0	0	0	0	0	0	0	0	0	0	0	0	0	0	0	0	0	0	0	0	0	0	0	0	0	0	0	0	0	0	0	0	0	0	0
1103	0	0	0	0	0	0	0	0	0	0	0	0	0	0	0	0	0	0	0	0	0	0	0	0	0	0	0	0	0	0	0	0	0	0	0	0	0	0	0	0	0	0	0	0	0	0	0	0	0
1104	0	0	0	0	0.0851788756388416	0	0	0	0	0	0	0	0	0	0	0	0	0	-0.163783779962818	0	0.349480797641853	0.255536626916525	0	0	0	0	0	-0.0829875518672199	0	0	0.170357751277683	0	0	0.0851788756388416	0	1.15115185873737	0.0851788756388416	0	0	0	0.091752846953706	0	0	0	0	0	0	0	0
1105	0	0	0	0.00381112085064217	0	0	0	0	0	0	0	0	0	0	0	0	0	0	0	0	0	0	0	0	0	0	0	0	0	-0.0033526670466356	0	0	0	0	-0.0033526670466356	0	0	0	0	0	-0.0067053340932712	0	0	0	0	0	0	0.0114333625519265	0
1106	0	0	0.00320605302811708	0	0	0	0	0	0	0	0	0	0	0	0	0	0	-0.00236694793898008	0	0	0	0	0	0	0	0.00320605302811708	0	0	0	0	0	0	0	0	0	0	0	0	0	0	0	0	0	0	0	0	0	0	0
1107	0	0	0	0	0	0	0	0	0	0	0	0	0	0	0	0	0	0	0	0	0	0	0	0	0	0	0	0	0	0	0	0	0	0	0	0	0	0	0	0	0	0	0	0	0	0	0	0	0
1108	0	0	0	0	0	0	0	0	0	0	0	0	0	0	0	0	0	0	0	0	0	0	0	0	0	0	0	0	0	0	0	0	0	0	0	0	0	0	0	0	0	0	0	0	0	0	0	0	0.0141602945341263
1109	0	0	0	0	0	0	0	0	0	0	0	0	0	0	0	0	0	0	0	0	0	0.0215054202784264	0	0	0	0	0	0	0	0	0	0	0	0	0	0	0	0	0	0	0	0	0	0	0	0	0	0	0
1110	0	0	0	0	0	0	0	0	0	0	0	0	0	0	0	0	0	-0.00169962627615692	0	0	-0.00268940107038163	0	0.00367917586460633	0.00735835172921266	0.0481092095521748	0	0	0.00367917586460633	0	0	0	0	0	0.00735835172921266	0	0	0	0	0	0.00735835172921266	0	0	0	0	0	0	0	0	0
1111	0	0	0	0	0	0	0	0	0	0	0	0	0	0	0	0	0	0	0	0	0	0	0	0	0	0	0	0	0	0	0	0	0	0	0	0	0.000676979318281827	0	0	0	0	0	0	0	0	0	0	0	0
1112	0	0	0	0.00674900452183303	0	0	0	0	0	0	0	0.00674900452183303	0	0	0	0	0	0	0	-0.00587924040214004	0	0	0.00674900452183303	0	0	0	0	0	0.00674900452183303	0	0	0.00674900452183303	0.0134980090436661	0	0.0134980090436661	0	0	0	0	0.011428152962289	0	0	0	0	0.00380938432076301	0	-0.00293962020107002	0	0
1113	0	0	0	0	0	0	0	0	0	0	0	0	0	0	-0.0156298843388559	0	0	-0.0312597686777118	0	0	0	0	0	0	0	0	0	0	0	0.0236630383341221	0	0	0	0	0	0.118315191670611	0.0473260766682442	0.0236630383341221	0	0	0	0	0	0	0	0	0	0	0
1114	0	0	0	0	0	0	0	0	0	0	0	0	0	0	-0.00456808734182998	0	0	0	0	0	0	0	0	0	0	0	0	0	0	0	0	0	0	0	0	0	-0.00913617468365995	0	0	0	-0.00456808734182998	0	0	0	0	0	0	0	0
1115	0	0	0	0	0	0	0	0	0	0	0	0	0	0	0	-0.0226179136894377	0	0.0241604252234839	0	0	0	0	0	0	0	0	0	0	0	0	0	-0.00867453157529493	0	-0.00867453157529493	0	0	0	-0.0173490631505899	-0.0991461863330461	-0.0260235947258848	-0.0226179136894377	-0.0173490631505899	0.0015425115340462	0.00340568103644707	-0.0173490631505899	0	0	-0.00867453157529493	0.012080212611742
1116	0	0	0	0	0	0	0	0	0	0	0	0	0	0	0	0	0	0	0	0	0	0	0	0	0	0	0	0	0	0	0	0	0	0	0	0	0	0	0	0	0	0	0	0	0	0	0	0	0
1117	0	0	0	0	0	0	0	0	0	0	0	0	0	0	0	0	0	0	0	0	0	0	0	0	0	0	0	0	0	0	0	0	0	0	0	0	0	0	0	0	-0.0957854406130268	0	0.613496932515337	0	0	0	0	0	-0.0957854406130268
1118	0	0	0	0.0118042849554388	-0.00374868795921427	0.0236085699108776	-0.00749737591842855	0	0.00215345451850514	-0.00749737591842855	0	0	0	0	-0.00749737591842855	-0.00374868795921427	-0.00749737591842855	0	0	0.0177064274331582	0	0	-0.0112460638776428	0	-0.0149947518368571	0	0.00590214247771941	-0.00749737591842855	0	0.00430690903701025	0	0.0220133364701686	0	-0.0149947518368571	0	-0.00374868795921427	0.00590214247771941	-0.00374868795921427	0.00590214247771941	-0.00374868795921427	-0.0337381916329285	0.0139577394739439	-0.0203386732367805	0	0	0	-0.00374868795921427	0.0241667909886737	0
1119	0	0	0	0	0	0	0	0	0	0	0	0.0129886998311469	0	0	0	0	-0.00924385283786282	0	0	-0.00924385283786282	0	0	0	0	0	0	0	0	0.0259773996622938	0	0	-0.0054990058445787	0	0	0	0	-0.00924385283786282	0.0129886998311469	0	0	-0.00924385283786282	-0.0184877056757256	-0.00924385283786282	0	0	0	0	-0.0184877056757256	0.0259773996622938
1120	0	0	0	0	0	0	0	0	0	0	0	0	0	0	0	0	0	0	0	0	0	0	0	0	0	0	0	0	0	0	0	0	0	0	0	0.00396809650410698	0	0	0	0	0	0	0	0	0	0	0	0	0
1121	0	-0.00110348480501424	0.00413667576735335	0	0	0	0	0	0	0	0	0	0.00827335153470671	0	0	-0.00110348480501424	0	0	0	0	0	0	0	0	0	0	0.00413667576735335	0	0	0	0.00413667576735335	0	0	0	0	0	0	0	0	0.00827335153470671	0	0	0	0	0	0	0	0	0
1122	0	0	0	0	0	0	0	0	0	0	0	0	0	0	0	0	0	0	0	0	0	0	0	0	0	0	0	0	0	0	0	0	0	0	0	0	0	0	0	0	0	0	0	0	0	0	0	0	0
1123	0	0	0	0	0	0	0	0	-0.00349027957139367	0	0	0.00432769290691133	0	0	0	0	0	0	0	0	0	0	0	0	0	0	0	0	0	0	-0.00349027957139367	0	0	0	0	0	0	0	0	0	0	0	0	0	0	0	0	0	0
1124	0	0	0	0	0	0	0.27124773960217	0	0	0	0	0	0	0	0	0	0	0	0	0	0	0	0	0	0	0	0	0	0	0	0	0	0	0	0	0	0	0	0	0	0	0	0	0	0	0	0	0	0
1125	-0.0156445556946183	0	-0.0156445556946183	0.200713683089498	0	0	0	0	-0.0156445556946183	0	0	0	0	0	0	0	0	0.0338849143400523	0	0	0	-0.0469336670838548	0	0	-0.0625782227784731	0	0.0495294700346706	-0.0156445556946183	0	0	0	-0.0469336670838548	0	0	-0.0156445556946183	-0.0312891113892365	-0.0156445556946183	0	-0.0312891113892365	0	-0.0469336670838548	0.00519160590163169	-0.0782227784730914	0	0	0.132943854409394	0	-0.0156445556946183	-0.0625782227784731
1126	0	0	0	0	0	0	0	0	-0.01404099971918	0	0	0	0	-0.04212299915754	0	0	0	0	0	-0.01404099971918	0	0	0	0	0.0030881541006213	0	0	0.0171291538198013	0	0	0.0513874614594039	0	0.9816289464517	0.102774922918808	0.228566695325891	0	-0.0828462275311535	-0.02808199943836	0	0.037057849207456	0.0171291538198013	0	0.288641394021622	0.0171291538198013	0	0.426251849645569	0	0	0
1127	0	0	0	0	0	0	0	0	0	0	0	0	-0.0269396551724138	0	0	0	0	0	0	0	0	0	0	0	0	0	0	0	0	0	0	0	-0.0269396551724138	0	-0.0538793103448276	0	0	0	0	0	0	0	0.0757297493450402	0	0	0	0	0	0
1128	-0.040551500405515	0	-0.040551500405515	-0.08110300081103	-1.37875101378751	-0.040551500405515	-0.97323600973236	-0.121654501216545	-0.446066504460665	0	0	-0.497397517632203	-0.08110300081103	0	0	0	-0.08110300081103	0	0	-0.040551500405515	0	0	0	0	0	-0.040551500405515	0	0	0	0	0	0	-0.040551500405515	-0.446066504460665	0	-0.792037533236831	0	-0.040551500405515	0	-1.90489389879578	-0.364963503649635	-16.8532548995452	-0.386522529181681	0.064933731661996	0	-0.040551500405515	0	0	0
1129	0	0	0	0	0	0	0	0	0	0	0	0	-0.00516288915276989	0	0	0	0	0	0	0	0	0	0	0	0	0	0	0	0	0	0	0	-0.00516288915276989	0	0	0	0	0	0	0	0	0	0	0	0	0	0	0	0
1130	0	0	0	-0.0582920431361119	0	0	-0.0582920431361119	0	0	-0.0874380647041679	0	0.0282357351801581	0	0	-0.116584086272224	0	0	0	0	0	0	0	0	-0.378898280384728	0	0	0	0	0	0	0	0	0	0	0	0	0	0	0	0	0	0	0	0	0	0	0	0	-0.029146021568056
1131	0	0	0	0	0	0	0	0	0	0	0	0	0	0	0	0	0	0	0	0	0	0	0	0	0	0	0	0	0	0	0	0	0	0	0.0091241323129075	0	0	0	0	0	0	0	0	0.0208681135225376	0	0	0	0	0
1132	0	0	0	0	0	0	0	0	0	0	0	0	0	0	0	0	0	0	0	0	0	0.0206654267410622	0	0	0	0	0	0	0	0	0	0	0	0	0	0	0	0	0	0	0	0	0	0	0	0	0	0	0
1133	0	0	0	0	0	0	0	0	0	0	0	0	0	0	0	0	0	0	0	0	0	0	0	0	0	0	0	0	0	0	0	0	0	0	0	0	0	0	0	0	0.0186254423542559	0	0	0	0	0	0	0	0
1134	0	0	0	0	0	0	0	0	0	0	0	0	0	0	0	0	0	0	0	0	0	0	0	0	0	0	0	0	0	0	0	0	0	0	0	0	0	0	0	0.00360152704746813	0	0	0	0	0	0	0.00360152704746813	0	0
1135	0	0	0	0	0	0	-0.00165880118438405	0	0	0	0.00303846031216346	0	0	0	0	0	-0.000829400592192023	0	0	0	0	0.00469726149654751	0	-0.000829400592192023	-0.00165880118438405	0	0	0	0	0	0	0.00773572180871098	0	0	0	0	0	0	0	0	0	0	0	0	0	0	-0.00248820177657607	0	0
1136	0	0	0	0	0	0	0	0	0	0	0	0	0	0	0	0	0	0	0	0	0	0	0	0	0	0	0	0	0	0	0	0	0	0	0	0	0	0	0	0	0	0	0	0	0	0	0	0	-0.0705218617771509
1137	0	0	0	0	0	0	0	0	0	0	0	0	0	0	0	0	0	0	0	0	0	0	0	0	0	0	0	0	0	0	0	0	0	0	0	0	0	0	0	0	0	0	0	0	0	0	0.00442067105786658	0	0
1138	0	0	0	0	0	0	0	0	0	0	0	0	-0.0228702115494568	0	0	0	0	0	0	-0.0205691612774914	0	0	0	0	0	-0.0011154523434333	0	0	0	0	-0.00571755288736421	0	0.00230105027196543	0	0	-0.00571755288736421	0	0	0.00801860315932964	0	0	0	0	-0.00571755288736421	0	0	0	0	0
1139	0	0	0	0	0	-0.0625	0	0	0	0	0	0	0	0	0	0	0	0	0	0	0.245218244237371	0.0980872976949485	0.196174595389897	0	0.0490436488474743	0	0.245218244237371	0	0	0	0	0	0.0980872976949485	0	0.0490436488474743	0	0	0	0.133674595389897	0	0	0.0980872976949485	0	0	0	0	0	0	-0.0625
1140	0	-0.010612331529237	0	0	-0.0212246630584739	0	0	0	0	0	0.0120889748549323	-0.010612331529237	0	0	0	0	0	0	0	-0.0424493261169479	0	0	-0.0318369945877109	0	0	0	0	0	0	0	0	0	0	0	0	0	0	0	0	0	0	0	0	0	0	0	0	0	0
1141	0	0	0	0	0	0	0	0	0	0	0	0	0	0	0	0	-0.0386922035209905	0	0	0	0	0	0	0	0	0	0	0	0	0	0	0	0	0	0	0	0	0	0	0	0	0	0	-0.0386922035209905	0	0	0	0	0
1142	0	0	0	0	0	0	0	0	0	0	0	0	0	0	0	0	0	0	0	0	0	0	0	0	0	0	0	0	0	0	0	0	0	0	0	0	0	0	0	0	0	0	0	0	0	0	0	0	0
1143	0	0	0	0	0	0	0	0	0	0	0	0	0	0	0	0	0	0	0	-0.00539316147125445	0	0	0	0	0	0	0	0	0	0	0	0	0	0	0	0	0	0	0	0	0	0	0	0	0	0	0	0	0.00339939490770643
1144	0	0	0	0	0	0	0	0	0	0	0	-0.0274047684297068	0	0	0	0	0	0	0	0	0	0	0	0	0	0	0	0	0	0	0	0	0	0	0	0	-0.0274047684297068	0	0	0	0	0	0	0	0	0	0	0	0
1145	0	0	0	0	0	0	0	0	0	0	0	0	0	-0.0121921482565228	0	0	0	0	0	0	0	0	0	0	0	0	0	0	0	0.0255936065139287	0	0	0	0	0	0	0	-0.0121921482565228	0	-0.0365764447695684	0	0	-0.0121921482565228	0	0	0	0	0	0
1146	0	0	0	0	0	0	0	0	0	0	0	0	0	0	0	0	0	0	0	0	0	0	0	0	0	0	0	0	0	0	0	0	0	0	0	0	0	0	0	0	0	0	0	0	0	0	0	0	0
1147	0	-0.00490340296165539	0	0	-0.00490340296165539	0	0	0	0	-0.00490340296165539	0	0	0	0	0.00685871056241427	0	0	0	0	0	0	0	0	0	0	0	0.0205761316872428	0	0	0	0	0	0	0.0225314392880017	0	0	-0.00490340296165539	0	0.0137174211248285	0	0	0	0.00685871056241427	0	0	0	0	0.00685871056241427	0
1148	0	0	0	0	0	0	0	0	0	0	0.0121802679658952	0	0	0	0	0	0	0	0	0	0	0	0	0	-0.00296340198547933	0	0	0	0	0	0	0	0	0	0	0	0	0.0213971339463112	0	0	-0.00889020595643799	0	0	-0.00889020595643799	0	0	0	0	0
1149	0	0	0	0	0	0	0	0	0	0	0	0	0	0	0	0	0	0	0	0	0	0	0	0	0	0	0	0	0	0	0	0	0	0	0	0	0	0	0	0	0	0	0	0	0	0	0	0	0
1150	0	0	0	0	0	0	0	0	-0.0162311313098523	0	0	0	0	0	0	0	0	0	0	0	0	0.0448833034111311	0	0	0	-0.0486933939295569	0	0	-0.0324622626197046	0	-0.0324622626197046	0	-0.0324622626197046	0	0	-0.0811556565492615	-0.0162311313098523	0	0	0	-0.0162311313098523	0	0.0124210407914265	-0.0162311313098523	0	0	0	0	0
1151	-0.031001343391547	0	0	0	0.0506778157861396	-0.0056624354984772	0	-0.0103337811305157	0	0	0	0	0.0126694539465349	0	0	0	-0.0206675622610313	-0.113671592435672	0	0	0	0	0	0	0	0	0	0	0.0253389078930698	-0.0103337811305157	0	0	-0.0103337811305157	0	0	-0.0859970117265833	-0.0103337811305157	-0.0469975600205398	-0.0103337811305157	0	0	0	0.0553491614181781	0	-0.0286656705755277	0	0	0	0
1152	0	0	0	-0.0113895216400911	0	0	0	-0.0113895216400911	0	0	0	0	0	0	0	0	0.0210043883048393	0	0	0	0	0	0	0	0	0	0	0	0	-0.0113895216400911	0	0	0	0	0	0.0161969549724652	-0.0113895216400911	0	0	0	0	-0.0113895216400911	0	0	0	0	0	0	0
1153	0	0	0	0	0	0	0	0	0	0	0	0	0	0	0	0	0	0	0	0	0	0	0	0	0	0	0	0	0	0	0	0	0	0	0	0	0	0	0	0	0	0	0	0	0	0	0	0	0
1154	0.0220701831825204	0	0	0	0	0	-0.0171614896172988	0	0	-0.0171614896172988	0	0	0	0	0	0	0	0	0	-0.0171614896172988	0	0	0	0.0049086935652216	0	0	0	0	0	0	0	0	0	0	0	0	0	0	0	0	0	0	0	0	0	0	0	0	0
1155	0	0	-0.00615991129727732	0	0	0	0	0	0	0	0	0	0	0	0	0	0	0	0	0	0	0	0	0	0	0	0	0	-0.00615991129727732	-0.0123198225945546	0	0.0274800769442154	0	0	0	0	0	0	0	0	0	0	0	0	0	0	0	0	0
1156	0	0	0	0	0	0	0	0	0	0	0	0	0	0	0.158730158730159	0	0	0	0	0	0	0	0	0	0	0	0	0	0	0	0	0	0	0	0	0	0	0	0	0	0	0	-0.0211685012701101	0	0	0	0	0	0
1157	0	0	0	0	0	0	0	0	0.0956937799043062	0	0	0	0	0	0	0	0	0	0	0	0	0	0.0318979266347687	0	0	-0.0132257637878587	0	0	0	0	0	0.0318979266347687	0	0	0	0	0	0	0	0	0	0	0	0	0	0	0	0	0
1158	0	0	0	0	0	0	0	-0.03725782414307	0	0	0.108225108225108	0	0	0	0	0	0	0	0	0	0	0	0	0	0	0	0	0	0	0	-0.0745156482861401	0	0	0	0	-0.03725782414307	0	0	0	0	0	0	0	0	0	0	0	0	0
1159	0	0	0	-0.0176242509693338	0	0	0	0	0	0	0	0	0	0	0	0	0	-0.0352485019386676	0	0	-0.0352485019386676	-0.0528727529080014	0.0664451827242525	0	0	0	0	0	0	0	0	0	0	0	0	0	0.0332225913621262	0	0	0	0	0	0	0	0	0	0	0	0
1160	0	0	0	0	0	0	0	0	0	0	-0.117353159609843	0	0	0	0	0	0	0	0	0	0	0	0	0	0	-0.0218007412252017	0	0	0	0	0	0	0	0	0	0	0	0	0	0	0	0	0	0	0	0	0	0	0
1161	0	0	0	0	0	0	0	0	0	0	0.160642570281124	0	0	0	0	0	0	0	0	0	0	0	0	0	0	0	0	0	-0.270758122743682	-0.0902527075812274	0	0	0	0	0	0	0	0	0	0	0	0	-0.00993142244066519	0	0	0	0	0	-0.00993142244066519
1162	0	0	0	0	0	0	0	0	0	0	0	0	0	0	0	0	0	0	0	0	0	0	0	0	0	0	0	0	0	0	0	0	0	0	0	0	0	0	0	0	0	0	0	0	0	0	-0.0108119796734782	0	0
1163	0	0	0	0	0	0	0	0	0	0	0	0	0	0	0	0	0	0	0	0	0	0	0	0	0	0	0	0	0	0	0	0	0	0	0	0	0	0	0	0	0	0	0	0	0	0	0	0	0
1164	-0.00977803852547179	-0.146670577882077	0.0082811117725833	-0.0788230789049292	-0.0880023467292461	-0.0977803852547179	-0.0586682311528307	-0.10755842378019	-0.146969963232654	-0.293939926465309	0.0770267668014635	-0.176004693458492	-0.0293341155764154	0.0385133834007318	-0.0684462696783025	0.0091792678243164	-0.0782243082037743	-0.0293341155764154	-0.0586682311528307	0	0	0	0	0	0	0	0	0	0	0	0	0	0	0	0	0	0	0	0	0	0	0	0.0385133834007318	0	0	0	0	0	0
1165	0	0	0	0	0	0	0	0	0	0.0300435631665916	0	0	0	0	0	0	0	0	0	0	0	0	0	0	0	0	0	0	0	0	0	0.0450653447498873	0	0	0	0	-0.014421690222094	0	0	0	0	0	0	0	0	0	0	0	0
1166	0	0	0	0	0	0	0	0	0	0	0	0	0	0	0	0	0	0	0	0	0	0	0	0	0	0	0	0	0	0	0	0	0	0	0	0	0	0	0	0	0	0	0	0	0	0	0	0	0
1167	0	0	0	0	0	0	0	0	0	0	0	0	0	0	0	0	0	0	0	0	0	0	0	0	0	0	0	0	0	0	0	0	0	0	0	0	0	0	0	0	0	0	0	0	0	0	0	0	0
1168	0	0	0	0	0	0	0	0	0	0	0	0	0	0	0	0	0	0	0	0	0	0	0	0	0	0	0	0	0	0	0	0	0	0	0	0	0	0	0	0	0	0	0	0	0	0	0	0	0
1169	0	0	0	0	0	0	0	0	0	0.0904159132007233	-0.0628535512256442	0	-0.125707102451288	0	0	0	0	0	0	0	0	0	0	0	0	0	0	0	0	0	0	0	0	0	0	0	0	0	0	0	0	0	0	0	0	-0.251414204902577	0	0	0
1170	0	0	0	0	0	0	0	0	0	0	0	0	0	0	0	0	0	0	-0.0203873598369011	0	0	0	0	0	0	0	0	0	-0.0407747196738022	0	0	0	0	0	0	0	0	0	0	0	0	0	0	0	0	0	0	0	0
1171	0.239234449760766	0	0	0	0	0	0	0	0	0.0797448165869219	0	0.159489633173844	0	0	0	0	0	0	0.0797448165869219	0	0	0.0797448165869219	0	0	0	0	0	0	0	0	0	0.0797448165869219	0	0	0	0	0	0	0	0	0	0	0	0	0	0	0	0	0
1172	0.0652315720808871	0	-0.0490196078431373	0	0	-0.343137254901961	-0.114634895053912	0.0652315720808871	-0.0490196078431373	0	-0.0980392156862745	0	-0.0980392156862745	0	0	0	0.0162119642377498	0	-0.0490196078431373	0.0652315720808871	0	0	-0.0490196078431373	0	0	0	0	0	0	0	0	0	0	0	0	0	0	0	-0.196078431372549	0	0	0	0	0	0	0	-0.0490196078431373	0	-0.0490196078431373
1173	0	0	0	0	0	0	0	0	0	0	0	0	0	0	0	0	0	0	0	0	0	0.0156042755715066	0	0	0	0	0	0.0078021377857533	0	0	0	0	0	0	0	0	0	0	0	0	0	0	0	0	0	0	0	0	0
1174	0	0	0	0	0	0	0	0	0	0	0	0	0	0	0	0	0	0	0	0	0	0	0	0	0	0	0	0	0	0	0	0	0	0	0	0	0	0	0	0	0	0	0	0	0	0	0	0	0
1175	0	0	0	0	0	-0.0222172850477672	0	0	0	0	0	0	0	0	0	0	0	0	0	0	0	0	0	0	0	0	0	0	0	0	0	0	0	0	0	0	0	0	0	0	0	0	0	0	0	0	0	0	0
1176	0	0	0	0	0	0	0	0	0	0	0	0	0	0	0	0	0	0	0	0	0	0	0	0	0	0	0	0	0	0	0	0	0	0	0	0	0	0	0	0	0	0	0	0	0	0	0	0	0
1177	0	0	0	0	0	0	0	0	0	0	0	0	0	-0.0154726907009129	0	0	0	0.089126559714795	0	0	0.029708853238265	0	0.029708853238265	0	0	0	0	0	0	0	0	0	0	0	0	0	0	0	0	0	0	0	0	0	0	0	0	0	0
1178	0	0	0	0	0	0	0	0	0	0	0	0	-0.00700304632515144	0	0	0	0	0	0	0	-0.00350152316257572	0	0	0	0	0.0102134613420488	0	0	0	0	0	0	0	0	0	0	0	0	0	0	0	0	0	0	0	0	0	0	-0.00350152316257572
1179	0	0	0	0	0	0	0	0	0	0	0	0	0	0	0	0	0	0	0	0	0	0	0	0	0	0	0	0	0	0	0	0	0	0	0	0	0	0	0	0	0	0	0	0	0	0	0	0	0
1180	0	0	0	0	0	0	0	0	0	0	0	0	0	0	0	0	0	0	0	0	0	0	0	0	0	0	0	0	0	0	0	0	0	0	0	0	0	0	0	0	0	0	0	0	0	0	0	0	0
1181	0	0	0	0	0	0	0	0	0	0	0	0	0	0	0	0	0	0	0	0	0	0	0	0	0	0	0	0	0	0	0	0	0	0	0	0	0	0	0	0	0	0	0	0	0	0	0	0	0
1182	0	0	0	0	0	0	0	0	0	0	0	0	0	0	0	0	0	0	0	0	0	0.184842883548983	0	-0.391389432485323	0	0	0	0	0	0	0	0	0	0	0	-0.684931506849315	0	-0.010851832693678	0	-0.119551023508687	0	-0.0978473581213307	0	0	-9.33872548842292	-0.0978473581213307	-0.108699190815009	1.1645825119099	0.173991050855306
1183	0	0	0	0	0	0	0	0	0	0	0	0	0	0	0	0	0	0	0	0	0	0	0	0	0	0	0	0	0	0	0	0	0	0	0	0	0	0	0	0	0	0	-0.00278963372109242	0	0	0	0	0	-0.00278963372109242
1184	0	0.14623446258835	0.0243724104313917	0	0.0148820431541781	0	0.0243724104313917	0	0	-0.00949036727721363	0.0487448208627833	0	0	0.0487448208627833	0	0.0636268640169614	0	0	0	0	0	0	0	0	0	0	0	0.073117231294175	0	0.0243724104313917	0	0	0	0	0	0	0	0	0	0	0	0	0	0	0	0	0	0	0
1185	0	0.0119132713843221	0	0	0.00499620698645256	0	0	0	0.0119132713843221	0	0	0.00499620698645256	0	0	0	0	0	0.0119132713843221	0	0	0	0	0	0	0	0	0	0	0	0	-0.00691706439786954	0.0119132713843221	0	-0.0138341287957391	0	0.0119132713843221	0	0	0	0.0238265427686443	0.0119132713843221	0	0	0	0	0.0119132713843221	0	0	0
1186	0	0	0	0	0	0	0	0	0	0	0	0	0	0	0	0	0	0	0	0	0	0	0	0	0	0	0	0	0	0	0	0	0	0	0	0	0	0	0	0	0	0	0	0	0	0	0	0	0
1187	0	0	0	0	0	0	0	0	0	0	0	0	0	0	0	0	0	0	0	0	0	0	0	0	0	0	0	0	0	0	0	0	0	0	0	0	0	0	0	0	0	0	0	0	0	0	0	0	0
1188	0	0	0	0	0	0	0	0	0	0	0	0	0	0	0	0	0	0	0	0	0	0	0	0	0	0	0	0	0	0	0	0	0	0	0	0	0	0	0	0	0	0	0	0	0.00364697301239971	0	0	0	0
1189	0	0	0	0	0	0	0	0	0.0042426636985486	0	0	0	0	0	0	0	0	0	0.0515687403667928	0	0	0	0	0	0	0	0	0	0	0	0	0	0	0	0	0	0	0	0	0	0	0	0	0	0	0	0	0	0
1190	0	0	0	0	0	0	-0.103788271925272	0	0	0	0	0	0	0	0	-0.0259470679813181	0	0	0	0	0.0272034820457018	-0.0259470679813181	0	0	0	0	-0.0259470679813181	0	0	0	0	0	0	0	0	0	0.0272034820457018	0.0544069640914037	-0.0518941359626362	0	0	0	0	0	0	0	0	0	-0.0259470679813181
1191	0	0	0	0	0	0	0	0	0	0	0	0	0	0	0	0	0	0.00146481514032929	0	0	0	0	0	0	0	0	-0.00046089111243891	0	0	0	0	0	0	0	0	0	0	0	0	0	0	0.00146481514032929	-0.00577711875830461	0	0	0	0	-0.0019257062527682	0
1192	0	-0.0233644859813084	0	0	0	0	0	0	0	0	0	0	0	0	0	0	0	0	0	0	0	0	0.0337127704297768	0	-0.0233644859813084	0	0	0	0	0	0	0	-0.0233644859813084	0	0	0	-0.0588558678006661	0	0	0	0.0916793325356532	0	0	0	0	0	0	0	0
1193	0	0	0	0	0	0	0	0	0	0	0	0	0	0	0	0	0	0	0	0	0	0	0	0	0	0	0	0	0	0	0	0	0	0	0	0	0	0	0	-0.0223313979455114	0	0	0	0	0	0	0	0	0
1194	0	0	0	-0.00591856060606061	0	0	0	0	0	0	0	0	0	0	0	0	0	0	0	0	0	0	0	0.0159642401021711	0	0	0	0.0159642401021711	0	0	0	0	-0.00591856060606061	0	0	-0.00591856060606061	0	0	0	0	0	0	0	0	0	0	0	0	0
1195	0	0	0	0	0	0	0	0	0	0	0	0	0	0	0	0	0	0	0	0	0	0	0	0	0	0	0	0	0	0	0	0	0	0	0	0	0	0	0	0	0	0	0	0	0	0	0	0	0
1196	0	0	0	0	0	0	0	0	0	0	0	0	0	0	0	0	0	0	0	0	0	0	0	0	0	0	0	0	0	0	0	0	0	0	0	0	0	0	0	0	0	0	0	0	0	0	0	0	0
1197	0	0	0	0	0	0	0	0	-0.00912575287461216	0	0	0	0	0	0	0	0	0	0.0180082838105529	0	0	0.0360165676211057	0	0	-0.00912575287461216	0.0180082838105529	0	0	0	0	0	0	0	0	0	0	-0.0182515057492243	0	0	0	0	0	0	0	0	0	0	0	0
1198	0	0	0	0	0	0	0	0	0.0602409638554217	0	0	0	0	0	0	0	0	0	0	0	0	0	0	0	0	0	0	0	0	0	0	0	0	0	0	0	0	0	0	0	0	0	0	0	0	0	-0.0170096955264501	0	-0.0170096955264501
1199	0	0	0	0	0	0	0	0	0	0	0	0	0	0	0	0	0	0	0	0	0	0	0	0.0405268490374873	0	0	0	0	0.0202634245187437	0	0	0	0	0	0	0	0	0	0	0	0	0	0	0	0	0	0	0	0
1200	0	0	0	0	0	0	0	0	0	0	0	0	0	0	0	0	0	0	-0.029146021568056	0	0	0	0	0	0	0	0	0	0	0	0	0	0	0	0	0	0	0	0	0	0	0	0	0	0	0	0	0	0
1201	0	0	0	0	0	0	0	0	0	0	0	0	0	-0.00159015376786935	0	0	0	0	0	0	0	0	0	0	0	0	0.00185477139942502	0	0	0	0	0	0	0	0	0	0	0	0.0113932460281057	0	0	0	0	0	0.00556431419827506	0	0	0	0.00185477139942502
1202	0	0	0	0	0	0	0	0	0	0	0	0	0	0	0	0	0	0	0	-0.00612444879960804	0	0	0	0	0	0	0	0	0	0	0	0	0	0	0	0	0	0	0	0	0	0	0	0	0	0	0	0	0
1203	0	0	0	0	0	0	0	0	0	0	0	0	0	0	0	0	0	0	0	0	0	0	0	0	0	0	0	0	0	0	0	0	0	0	0	0	0	0	0	0	0	0	0	0	0	0	0	0	0
1204	0	0	0	0	0	0	0	0	0	0	0	0	0	0	0	0	0	0	0	0	0	0	0	0	0	0	0	0	0	0	0	0	-0.00902608538676776	0	0	0	0	0	0	0	0	0	0	0	0	0	0	0	0
1205	0	0	0	0	0	0	0	0	0	0	0	0	0	0	0	0	0	0	0	0	0	0	0	0	0	0	0	0	0	0	0	0	0	0	0	0	0	0	0	0	0	0	0	0	0	0	0	0	0
1206	0	0	0	0	0	0	0	0	0	0	0	0	0	0	0	0	0	0	0	0	0	0	0.0541223164351434	0	0	0	0	0	0	0	0	0	0	0	0	0	0	0	0	0	0	0	0	0	0	0	0	0	0
1207	0	0	0	0	0	0	0	0	0	0	0	0	0	0	0	0	0	0	0	0	0	0	0	0	0	0	0	0	0	0	0	0	0	0	0	0	0	0	0	0	0	-0.00699839037021485	0	0	0	0	0	0	0
1208	0	0	-0.00899280575539568	0.001540048440358	0	0	0	0	-0.00899280575539568	0	0	0	0	0	0	0	0	0	0	0	-0.00899280575539568	0	0	0	0	0	0	0	0	0	0	0	0	0	0	0	0	0	0	0	0	0	0	0	0	0	0.0142592328532725	0	0
1209	0	0	0	0	0	0	0	0	0	0	0	0	0	0	0	0	0	0	0	0	0	-0.0146198830409357	0	0	0	0	0	0	0	0	0.0043912555816562	0	0	0	0	-0.0299628242298552	0.0241254523522316	-0.0146198830409357	-0.0051143137296397	0	-0.089165414541581	0	0	-0.0979479257048938	0.0095055693112959	0	-0.000723058147983596	0	0
1210	0	0	0	0	0	0	0	0	0	0	0	0	0	0	0	0	0	0	0	0	0	0	0	0	0	0	0	0	0	0	0	0	0	0	0	0	0	0	0	0	0	0	0	0	0	0	0	0	0
1211	0	0	0	0	0	0	0	0	0	-0.0416319733555371	0	0	0	-0.0416319733555371	0	0	0	0	0	0	0	0	0	0	0	0	0	0	0	-0.0317175549584968	0	0	0	0	-0.0416319733555371	0	0	0	0	0	0	0	0	0	0	0	0	0	0
1212	0	0	0	0	0	0	0	0	0	0	0	0	0	0	0	0	0	0	0	0	0	0	0	0	0	0	0	0	0	0	0	0	0	0	0	0	0	0	0	0	0	0	0	0	0	0	0	0	0
1213	0	0	0	0	0	0	0	0	0	0	0	0	0	0	0	0	0	0	0	0	0	0	0	0	0	0	0	0	0	0	0	0	0	0	0	0	0	0	0	0	0	0	-0.0902527075812274	-0.0128932439401753	0	-0.0257864878803507	0	0	0
1214	0	0	0	0	0	0	0	0	0	0	0	0	0	0	0	0	0	0	0	0	0	0	0	0	0	0	0	0	0	0	0	0	0	0	0	0	0	0	0	0	0	0	0	0	0	0	0	0	0
1215	0	0	0	0	0	0	0	0	0	0	0	0	0	0	0	0	-0.0428449014567266	0	0	0	0	0	0	0	0	0	0	0.0661813368630046	0	0	0	0	0	0	0	0	0	0	0.0661813368630046	0	0	0	0	0	0	0	-0.0428449014567266	0	-0.0428449014567266
1216	0	0	0	0	0	0	0	0	0	0	0	0	0	0	0	0	0	0	0	0	0	0	0	0	0	0	0	0	0	0	0	0	0	0	0	0	0	0	0	0	-0.0178316690442225	0	0	-0.0178316690442225	0	0	0	0	0
1217	0	0	0	0	0	0	0	0	0	0	0	0	0	0	0	0	0	0	0	0	0	0	0	0	0	0	0	0	0	0	0	0	0	0	0	0	0	0	0	0	0	0	0	0	0	0	0	0	0
1218	0	0	0	0	0	0	0	0	0	0	0	0	0	0	0	0	0	0	0	0	0	0	0	0	0	0	0	0	0	0	0	0	0	0	0	0	0	0	0	0	0	0	0	0	0	0	0	0	0
1219	0	0	0	0	0	0	0	0	0	0	0	0	0.0234296617197603	0	0	0	0	0	0.143477680927443	0	0	0	-0.0966183574879227	0	0	0	0	-0.0365943478840812	0	-0.0483091787439614	0	0	-0.144927536231884	0	0	-0.169807053256085	-0.0966183574879227	0.070288985159281	0	0	0	0	0	0	0	0	0	0	0
1220	0	0	0	0	0	0	0	0	0	0	0	0	0	0	0	0	0	0	0	0	0	0	0	0	0	0.0099000099000099	0	0	0	0	0	0	0	0	0	0	0	0	0	0	0	0	0	0	0	0	0	-0.0070482097547223	0
1221	0	0.0454545454545455	0.106060606060606	0.0303030303030303	0.0330426647956968	0.0151515151515152	0	0	0	0.426982058735091	0	0	0	0	0.0633456950987271	0	0	0	0	0	0.0151515151515152	0	0	0	0.0303030303030303	0	0	-0.0551267916207277	0	0	0	0	0	0	0	0	0	0	0	0	0	0	0	0	0	0	0	0	0
1222	0	0	0	0	0	0	0	0	0	0	0	0	0	0	0	0	0	0	0	0	0	0	0	0	0	0	0	0	0	0	0	0	0	0	0	0	0	0	0	0	0	0	0	0	0	0	0	0	0
1223	0	0	0	-0.0181818181818182	0.0243013365735115	0.0729040097205346	-0.0363636363636364	0	0	0.0122390367833867	0	0	0	-0.0181818181818182	0	0	0	0.0304208549652049	0	0.0486026731470231	0	0.0729040097205346	0	0	0	-0.0363636363636364	0.0972053462940462	0	0	0.0729040097205346	0.0243013365735115	0.0486026731470231	0	0.0851430465039216	0	0.0729040097205346	0	0	0.0547221915387164	0	0	0	0	0	-0.0181818181818182	0.0243013365735115	0	0	0
1224	0	0	0	0	0	0	0	0	0	0	0	0	0	0	0	0	0	0	0	0	0	0	0	0	0	0	0	0	-0.00403697872512212	0	0	0	0	0	-0.00807395745024424	0	0	0	-0.0282588510758548	0	0	-0.00588893517984624	0	0	0.00218502227039804	0	0.0199982662492563	0	0.0127770678067142
1225	0	-0.00432395036104985	0	0	-0.00432395036104985	-0.0216197518052493	-0.00432395036104985	0	-0.00432395036104985	0	0	0	-0.00864790072209971	-0.0129718510831496	0.016632288036643	0.0168534591724952	0	0	0	0	0.00842672958624758	0	0	0	-0.0434606747463507	0	0	0	0	0	0.0248378464870385	0	0	0	0	-0.00864790072209971	0	-0.00864790072209971	0.0125295088114454	0	0	0	0	0	0	0	0	0	0
1226	0	0	0	0	0	0	0	0	0	0	0	0	0	0	0	0	0	0	0	0	0	0	0	0	0	0	0	0	0	0	0	0	0	0	0	0	0	0	0	0	0	0	0	0	0	0	0	0	0
1227	0	0	0	0	0	0	0	0	0	0	0	0	0	0	0	0	0	0	0	0	0	0	0	0	0	0	0	0	0	-0.0038627935723115	0	0	0	0	0	0	0	0	0	0	0	0	0	0	0	0	0	0	0
1228	0	-0.00431015904486876	0	-0.00862031808973751	0	-0.00862031808973751	0	0	0	0	0	-0.00431015904486876	0	0	0	0.0267773463649752	0	0	0	-0.00431015904486876	0	0	0	0	0	0	0	0	0	0	-0.00862031808973751	0	0	0	0	0	0	0	0	0	0	0	0	0	0	0	0	0	0
1229	0	-0.0232342007434944	0	0	0	0	0	0	-0.019361833952912	0	0	0	0	-0.00774473358116481	0	0	0	0	0	0	-0.0116171003717472	0	-0.019361833952912	-0.0038723667905824	0	-0.00774473358116481	0	0	0	0	0	0	0	0	0	-0.00774473358116481	0	0	0	0	0	0	0	0	0	0	0	0	0
1230	0	0	0	0	0	0	0	0	0	0	0	0	0	0	0	0	0	0	0	0	0	0	0	0	0	0	0	0	0	0	0	0	0	0	0	0	0	0	0	0	0	0	0	0	0	0	0	0	0
1231	0	0	0	0	0	0	0	0	0	0	0	-0.042185192997258	0	0	0	0	0	0	0	0	0	0	0	0	0	0	0	0	0	0	0	0	0	0	0	0	0	0	-0.021092596498629	0	0	0	0	0	0	0	0.0178858880343409	0	0
1232	0	-0.0848536274925753	-0.0212134068731438	0	0	0	0	0	0	0	0	0	0	0	0	0.0295674267144754	0	0	-0.0212134068731438	0	0	0	0	0	0	0	0	0	0.0359971202303816	0	0	0	0	0	0	0	0	0	0	0	0	0	0	0	0	0	0	0.0443511400717135	0
1233	0	0	0	0	0	0	0	0	0	0	0	0	0	0	0	0	0	0	0	0	0	0	0	0	0	0	0	0	0	0	0	0	0	0	0	0	0	0	0	0	0	0	0	0	0	0	0	0	0
1234	-0.0490196078431373	0	0	0	0	0	-0.0490196078431373	0	0	0	0	0	0	0	0	0.0392310710082385	0	0	0	0	0	0	0	0	0.0147212670866699	0	0	0	0	0	0	0	0	0	0	0	0	0	0	0	0	0	0	0	0	0	0	0	0
1235	0	0	0	0	0	0	0	0	0	0	0	0	0	0	0	0	0	0	0	0	0	0	0	0	0	0	0	0	0	0	0	0	0	0	0	0	0	0	0	0	0	0	0	0	0	0	0	0	0
1236	0	0	0	0	0	0	0	0	0	0	0	0	0	0	0	0	0	0	0	0	0	0	0	0	0	0	0	0	0	0	0	0	0	0	0	0	0	0	0	0	0	0	0	0	0	0	0	0	0
1237	0	0.040983606557377	0	0	0	0	0	0	0.0098091839004169	0	-0.0534130968913578	0	-0.0106826193782716	0.0614754098360656	0	0	0	0.050792790457794	0	0	0	0	0.0597285388803568	0	0	0	0	0	-0.0106826193782716	0	0.0204918032786885	-0.0427304775130862	0.0204918032786885	0	0	0	0	0	0	0	0	-0.0106826193782716	0	0	-0.0106826193782716	0	0	0.0695377227807732	0
1238	0	0	0.103704757736326	-0.00414439056736707	0	0	0	-0.00414439056736707	0.0018924496717259	-0.00414439056736707	0.00716281068691354	0	0	0.00716281068691354	0.0648722841822122	0.71826851191523	0.0275252722998336	0.00716281068691354	0.0090552603586394	-0.0063963314630082	-0.0372995151063036	0.15312545009689	0.0233808817324665	0.0346880829867472	-0.0425698761214913	-0.00828878113473414	-0.0304961956433054	-0.00414439056736707	-0.0207219528368353	0.430101118647336	0.0049108697912723	0	-0.0014854616717359	0	-0.0045038817912823	0	-0.0165775622694683	0	0	0.0192364911650994	0	0	-0.00414439056736707	0.00716281068691354	0.074741520540831	0	0	0	0.121408290453615
1239	0	0	0	0	0	0	0	0	0	0	0	0	0	0	0	0	0	0	0	0	0	0	0	0	0	0	0	0	0	0	0	0	0	0	0	0	0	0	0	0	0	0	0	0	0	0	0	0	0
1240	0	0	0	0	0	0	0	0	0	0	0.128369704749679	0	-0.0454029511918275	0	0	0	0	0	-0.113507377979569	0	0	0	0	0	0.0829667535578515	0	0	0	0	0	0	0	0	0	0	0	0	0	0	0.128369704749679	-0.0227014755959137	-0.0454029511918275	0	0	0	0	0.128369704749679	0	0
1241	0	0	-0.0313087038196619	0	0.0508646998982706	0	0	-0.0313087038196619	0	-0.0313087038196619	0	0	0	0	0	0	0	0	0	0	0	0	0	0	0	0	0	0	0	0	0	0	0	0	0	0	0	0	0	0	0	0	0	0	0	0	0	0	0
1242	-0.0773020523072461	0.051159972996045	0.0346560388147635	0	0	-0.0366535324841932	-0.0274901493631449	0	-0.00916338312104829	0.10114653754876	0	0	0	0	0	0	0.0173280194073817	0	0	-0.00916338312104829	0	0	0	0	0	0	0	0	0	0	0	0	0	0	0	0	0.0173280194073817	0	0	0	0	0	0	0	0	0	0	0	0
1243	0	0	0	0	0	0	0	0	0	0	0	0	0	0	0	0	0	0	0	0	0	0	0	0	0	0	0	0	0	0	0	0	0	0	0	0	0	0	0	0	0	0	0	0	0	0	0	0	0
1244	0	0	0	0	0	0	-0.0694927032661571	0	0	0	0	0	0	0	0	0	0	0	0	0	0	0	0	0	0	0	0	0	0	0	0	0	0	0	0	0	0	0	0	0	0	0	0	0	0	0	0	0	0
1245	0	0.141442715700141	0	0	0	0	0	0	0	0	0	0	0	0	0	0	0.0531126239180404	0	0	0	0	0	0	-0.0176087339320303	0	0	0.141442715700141	0.282885431400283	0	0	-0.0176087339320303	0	0	-0.0176087339320303	0	0	0	0	0	0	0	0	0	0	0.0707213578500707	0	-0.0176087339320303	0	0
1246	0	0	0	0	0	0	0	0	0	0	0	0	0	0	0	0	0	0	0	0	0	0	0	0	0	0	0	0	0	0	0	0	0	0	0	0	0	0	0	0	0	0	0.0519210799584631	0	0	0	0	0	0
1247	-0.00548095368594135	0	0	0	0	0	0	0	0	0	0	0	0	0	0	0	0	0	0	0	0	0.00546716964627412	0	0.00273358482313706	0	0	0	0	0	0.00273358482313706	0	0	0	0	0	0	0	0	-0.00274047684297068	0.00273358482313706	0	0	0	0	0	0	0	0	0
1248	0	0	0	0	0	0	0	0	0	0	0	0	0	0	0	0	0	0	0	0	0	0	0	0	0	0	0.0785545954438335	0	0	-0.0289771080846132	0	0	0	0	0	0	0	0	0	0	0	0	0	0	0	0	0	0	0
1249	0	0	0	0	0	0	0	0	0	0	0	0	0	0	0	0	0	0	0	0	0	0	0	0	0	0	0	0	0	0	0	0	0	0	0	0	0	0	0	0	0	0	0	0	0	0	0	0	0
1250	0	0	0	0	0	0	0	0	0	0	0	0	0	0	0	0	0	0	0	0	0	0	0	0	0	0	0	0	0	0	0	0	0	0	0	0	0	0	0	0	0	0	0	0	0	0	0	0	0
1251	0	0	0	0	0	0	0	0	0	0	0	0	0	0	0	0	0	0	0	0.0236350744504845	0	0	0	0	0	0	0	0	0	0	0	0	0	0	0	0	0	0	0	0	0	0	0	0	0	0	0	0	0
1252	0.255218154902534	0	0.292192919204122	-0.00367766144393072	0.0095276115209222	-0.0063187160369013	0	0	-0.000468765959909911	0	0	0.0179195412597438	0	-0.0010366068509601	0	-0.0252748641476052	0.00264105459297058	0	0	0.0268793118896156	0	0	0	-0.0126374320738026	0.00895977062987188	0	0	0	0	0	0.0179195412597438	0	0.0079231637789117	0.0179195412597438	0	0	0	0	0	0	0	0	0	0	0.0116008252228425	0	0	0.0537586237792313	0
1253	0	0	0	0	0	0	0	0	0	0	0	0	0	0	0	0	0	0	0	0	0	0	0	0	0	0	0	0	0.00850557114910266	0	0	0	0	0	0	0	0	0	0	0	0	0	0	0	0	0	0	0	0
1254	0.00553924555475544	0	0	0	-0.0145348837209302	-0.00726744186046512	0.0185232612887892	0	0	0	0	0	0	0	0.000354656637626499	-0.0109011627906977	-0.00726744186046512	0	0.0112558194283241	-0.00363372093023256	0	0	-0.00363372093023256	0	0	-0.0109011627906977	0	0	-0.0162630800266399	0	0	-0.062215067005548	0.0095276231226144	0	0	0	0	-0.00172819630570968	0	0	-0.0250813898740015	0	0	-0.00726744186046512	-0.00363372093023256	0	0	0	0
1255	-0.0542299349240781	0	0	0	-0.162689804772234	0	0	0	0	0	0	-0.0542299349240781	0	0	-0.0542299349240781	0	0	0	0	-0.0542299349240781	0	0	0	0	0	0	0	0	0	-0.162689804772234	0	0	0	0	0	0	0	0	0	0	0	0	0	0	0	0	0	0	0
1256	0.00345721694036301	0	0	0	0	0	0	0	0	0	0	0.00345721694036301	0	0	0	0	0	0	0	0	0.00345721694036301	0	-0.00276717029165975	0	0	0	0	0	0	0	-0.00276717029165975	-0.00830151087497925	0	-0.00276717029165975	0	-0.0055343405833195	0	0	0	0	0	0	-0.00276717029165975	0	0.010371650821089	0	0	-0.00276717029165975	0
1257	0	0	0.00827266710787558	0.00018265837665606	0.0404323636033133	0.00422766274226583	0	0.00018265837665606	0	0	-0.00386234598895369	0	0	0	-0.00128744866298456	0.00551511140525039	0	0	0	0.00275755570262519	-0.00128744866298456	0.00551511140525039	0.00018265837665606	0	0.00551511140525039	0.00018265837665606	0	0	0	0	0.00275755570262519	0	0	0	0.00275755570262519	0	-0.00128744866298456	0	0	0	0	0	0	0	0	0	0	0	0
1258	0	0	0	-0.0658761528326746	0	0	0	0	0	0	0.161681487469685	0	0	0	0	0	0	0	0	0	0	0	0	0	0	0	0	0	0	0	0	0	0	0	0	0	0	0	0	0	0	0	0	0	0	0	0	0	0
1259	0	0	0	0	0	0	0	0	0	0	0	0	0	0	0	0	0	0	0	0	0	0	0	0	0	0	0	0	0	0	0	0	0	0	0	0	0	0	0	0	0	0	0	0	0	0	0	0	0
1260	0	0	0	0	0	0	0	0	0.000557677829517888	-0.000135223212957629	0	0	0	0	0	0	0	0	0	0	0	0	0	-0.000811339277745775	-0.000135223212957629	0	0	0	0	0	0	0	0	0	0	0	0	0	0	0	0	0	0	-0.000676116064788146	0	0	0	-0.000270446425915258	0
1261	0	0	0	0	0	0	0	0	0	0	-0.0677506775067751	0	0	0	0	0	0	0	0	0	-0.0677506775067751	0	-0.0677506775067751	0	0	0	0	0	0	0	0	0	0	0	-0.0677506775067751	0	0	0.0919937314389119	0	0	0	0	0	0	0	0	0	0	0
1262	0	0	0	0	0	0	0	0	0	0	0	0	0	0	0	0	0	0	0	-0.0150285542530809	0	0	0	0	0	0	0	0.110741971207087	0	0	0	0	0	0	0	0	0	0	0	0	0	0	0	0	0	0	0	0.280283368965819	0.0369139904023625
1263	0	0	0	0	0.00284738944932872	0	0	0	0	0	0	0	0	0.00189994870138506	0	0	0	0	0	0	0	0	0	0	0	0	0	0	0	0	-0.00666755567408988	-0.000952507953441411	0	0	0	0	0	0	0	0	0	0	0	-0.00476253976720706	0	0	0	-0.00286765827131975	0.000947440747943649
1264	0	0	0	0	0	0	0	0	0	0	0	0	0	0	0	0	0	0	0	0	0	0	0	0	0	0	0	0	0	0	0	0	0	0	0	0	0	0	0	0	0	0	0	0	0	0	0	0	0
1265	0	0	0	0	0	0	0	0	0	0	0	0	0	0	0	0	0	0	0	0	0	0	0	0	0	0	0	0	0	0	0.0133226751931788	0	0	0	0	0	0	0	0	0	0	0	0	0	0	0	0	0	0
1266	0	0	0	0	0	0	0	0	0	0	0	0	0	0	0	0	0	0	0	0	0	0	0	0	0	0	0	0	0	0	0	0	0	0	0	0	0	0	0	0	0	0	0	0	0	0	0	0	0
1267	0	0	0	0	-0.0227769679300292	0	0	0.0126869766651581	0	0	0	0	0	0	0	0	0	0	0	0	-0.00455539358600583	0	0	0	0	0	0	0	0	0	0	0	0	0	0	0	0	0	0	0	0	0	0	0	0	0	0	0	0.0114949135007759
1268	0	0	0	0	0	0	0	0	0	0	0	0	0	0	0	0	0	0	0	0	0	0	0	0	0	0	0	0	-0.0188182160331201	0	0	0	0	0	0	0	0	0	0	0	0	0	0	0	0	0	0	0	0
1269	-0.23342438539856	0.095647236715102	-0.031640002203661	0.138092428199896	-0.031179716080359	0.215302953680221	0.169684094867936	-0.011774097063358	-0.094871671075362	0.12047961814048	-0.053759002424851	-0.23342438539856	-0.243357337968711	0.078954998902289	-0.089444908666985	-0.188726098832878	-0.05647238362904	-0.210893434589689	-0.108850527683986	0.155705238259312	-0.01223438318666	-0.041572954773813	-0.043365763731398	-0.048792526139775	-0.068198145156777	-0.243357337968711	0.030210808298135	-0.073164621441852	-0.0302591438337561	-0.028006048752869	0.0803358572721939	0.087095142514855	-0.047871953893172	0.015311379442908	0.050488664026118	-0.129128383411969	-0.069990954114362	-0.135015431943648	-0.332753911100075	0.214382381433618	0.019817569604682	0.106961047655158	0.02211900022119	0.0753693809871182	-0.0325122389146431	-0.052838430178248	-0.0993295257015148	0.0437777143190783	-0.046079144935587
1270	0	0	0	0	0	-0.0073177871011806	-0.0024392623670602	0	0	0	0.00764555220000765	0	0	0.00382277610000382	0.0142353557658987	0.00382277610000382	0	0	0	0	0	0	0	0	0	0.00382277610000382	-0.0073177871011806	0.00520628983294745	0	0.00764555220000765	0	0	0	0	0	-0.0024392623670602	0	0	0	-0.0073177871011806	0.0114683283000115	0	0	0.00382277610000382	0	0	0	0	-0.0048785247341204
1271	0	0	0	0	0.00669568128557081	0	-0.00148093359586827	0	0	0	0	0	0.00669568128557081	0	-0.00817661488143908	0.00669568128557081	0	0	0	0	0	-0.0245298446443173	0	0	0	0	0	0	0	-0.0141003492649122	0	0	0	0	0	0	0	0	0	0	0	0	0	0	0	0	0	0	0
1272	-0.00419334097453244	0	-0.00139778032484415	-0.00032270029211268	0	0	-0.00204318090906952	0.00107508003273146	-0.00795700250055878	-0.0036566823696329	0.0094599991588638	0.0054823793200507	0.013976040425509	-0.0153755835732856	0.00182745977335023	0.0036549195467004	0.01139620091154	-0.00311826094180098	-0.00419334097453244	-0.00204318090906952	0	0.00322524009819438	-0.00838668194906489	-0.00139778032484415	-0.0153755835732856	-0.00279556064968829	0.00247286035757561	0	-0.00419334097453244	0	0.00494572071515122	0.00107508003273146	0	-0.00139778032484415	0	0	0	0	0	0	-0.00139778032484415	0	0	0	0	0	-0.00139778032484415	0	0
1273	0	0	0	0	-0.0092063208086053	0	-0.0353232073472271	0	0	0	0	0	0	0	0	0	0	0	0	0	0	0	0	0	0	0.00864304235090752	0	0	0	0	0	0	0	0	0	0	0	0	0	0	0	-0.00883080183680678	0	0	0	-0.00883080183680678	0	0	0
1274	0	0	0	0	0	0	0	0	0	0	0.0174703004891684	0	0	0	0	0	0	-0.0145327713995059	0	0	0	0	0	-0.0145327713995059	0	0	-0.0145327713995059	0	0	0	0	0	0	0	0	0	0	0	0	0	0	0	0	0	0	0	0	0	0
1275	0	0	0	0	0	0	0	0	0	0	0	0	0	0	0	0	0	0	0.0511901714870745	0	0	0	0	0	0	0	0	0	0	0	0	0	0	0	0	0.0255950857435372	0	0	0	0	0	0	0	0	0	0	0	0	0
1276	0	0	0	0	0	0	0	0	0	0	0	0	0	0.0323721476263849	0	0	0	0	0	0	0	0	0	0	0	0	0	0	0	0	0	0	0	0	0	0	0	0	0	0	0	0	0	0	0	0	0.105099420353657	0	0
1277	0	0	0	0	0	0	0	0	0	0	0	0	0	0	0	-0.01998001998002	0	0	0	0	0	0	0	0	-0.03996003996004	0	0	0	0	0	0	0	0	0	0	0	-0.01998001998002	0	0	0	0	0	0	0	0	0	-0.03996003996004	-0.43956043956044	0
1278	0	0	0	0	0	0	0	0	0	0	0	0	0	0	0	0	0	0.0359712230215827	0	0	0	0	0	0	0	0	0	0	0	0	0	0	0	0	0	0	0	0	0	0	0	0	0	0	0	0	0	0	0
1279	0	0	0	-0.00286221306314042	0	0	0	0	0	0	0	0	0	0	0	0	0.0117961623151935	-0.0143110653157021	-0.00572442612628084	0	0	0	0	-0.00286221306314042	0	0	0	-0.00572442612628084	0	0	0	0	0	0	0	0.00786410821012897	0	-0.00286221306314042	0	0	0	0	0	0	0	0	0	0	0
1280	0	0	0	0	0	0	0	0	0	0	0	0	0	0	0	0	0	0	0	0	0	0	0	0	0	0	0	0	0	0	0	0	0	0	0	0	0	0	0	0	0	0	0	0	0	0	0	0	0
1281	0	0	0	0	0	0	0	0	0	0	0	0	0	0	0	0	0	0	0	0	0	0	0	0	0	0	0	0	0	0	0	0	0	0	0	0	0	0	0	0	0	0	0	0	0	0	0	-0.00746602956547708	0
1282	-0.163722334339017	-0.227787498999421	-0.137645082394636	-0.160691714771951	-0.265705052756777	-0.281703939337365	-0.098881739892024	-0.047150130375891	-0.233778379174886	-0.228985823158638	-0.0313630612919256	0.0230466323773146	-0.0413710676970497	-0.0217779492594297	-0.127143822658215	-0.0539867992966119	-0.0265705052756777	-0.0687873617179839	-0.11100421816029	-0.0757647485560415	-0.0509561797295454	-0.177606749056464	-0.100996211755166	-0.0831650297667275	-0.198116015198009	-0.0931730361718516	-0.0801344101996611	-0.886412526750471	-0.015293815752669	-0.105788767771414	-0.158083989577512	-0.036225976266842	0.0100080064051241	0	-0.044401687264116	0	-0.029601124842744	0	-0.00740028121068601	0.0300240192153723	0	0	-0.00740028121068601	0	-0.022200843632058	0	0.0100080064051241	0	0
1283	0	0	0	0.220456935689638	0	0	0	0	0	0	0	0	0	0	0	0	0	0	0	0	0	0	0	0	0	0	0	0	0	0	0	0	0	0	0	0	0	0	0.0134480903711673	0	0	0	0	0	0	0	0	0	0
1284	0	0	0	0.16750418760469	0	0.251256281407035	0	0	0	0	0	0	0	0	0	0	0	0	0	0	0	0	0	0	0	0	0	0	0	0	0	0	0	0	0	0	0	0	0	0	0	0	0	0	0	0	0	0	0
1285	0	0	0	0	0	0	0	0	0	0	0	0	0	0	0	0	0	0	0	0	0	0	0	0	0	0	0	0	0	0	0	0	0	0	0	0	0	0	0	0	0	0	0	0	0	0	0	0	0
1286	0	-0.383700915802788	-0.0640102416386622	0	-0.575911907733368	0	-0.735937511830023	0	-1.64456824839641	-0.0160025604096655	-0.0960153624579933	-8.37543469459141	-0.207402350774579	-0.0959252289506973	-0.0160025604096655	-3.12667728799916	0.000360534029184595	-1.41593559378898	9.01335072962008e-05	0.000180267014592297	5.3911528966617	-0.334431365471645	-0.0158222933950732	-0.0160025604096655	-1.07018861028707	-0.0160025604096655	-0.095294294399624	0	-0.0480076812289966	0	0	0.064460909175143	-0.0798325350337356	-0.0159124269023694	0.112648857418732	0.65492551547224	0.021410570847435	0.081995739208843	-0.111386988316586	-0.0958350954434006	-0.0960153624579933	-0.477733341100267	0.0160926939169617	0	0	0	9.01335072962008e-05	0	0.0160926939169617
1287	0	0	0	0	0	0	0	0	0	0	0	0	0	0	0	0	0	0	0	0	0	0	0	0	0	0	0	0	0	0	0	0	0	0	0	0	0	0	0	0	0	0	0	0	0	0	0	0	0
1288	0	0	0	0	-0.00622006593269889	0	0	0	0	0	0	0.0291036088474971	0	0	0	0	-0.00622006593269889	0.0748706946770935	0	0	0	0	0	0	0	0	0	0	0	0	0	0	0	-0.0186601977980967	0	0	-0.00622006593269889	0	0	0.0291036088474971	0	-0.00622006593269889	0	0	0	0	0	-0.0124401318653978	0
1289	0	0	0	0	0	-0.0466200466200466	0	0	0	0	0	0	0	0	0	0	0	0	0	0	0	0	0	0	0	0	0	0	0	0.0549450549450549	0	0	0.21978021978022	0	0	0	0	0	0.0316350316350316	0	0	0	0.0865800865800867	0	0	0	0	0	0
1290	0	0	0	0	0	0	0	0	0	0	0	0	0	0	0	0	0	0	0	0	0	0	0	0	0	0	0	0	0	0	0	0	0	0	0	0	0	0	0	0	0.280112044817927	0	0	0	0	-0.0917431192660551	0	0	0
1291	0	0	0	0	0	0	0	0	0	0	0	0	0	0	0	0	0	0	0	0	0	0	0	0	0	0	0	0	0	0	0	0	0	0	0	0	0	0	0	-0.0636638548464109	0	0	0	0	0	0	0	0	0
1292	0	0	0	-0.010924186148132	0	0	0	0	0	0	0	0	0.0082586260521366	0	0	0	0	0	0	0	0.0383656244005371	0	0	0	0	0	0	0	0	0	0	0	0	0	0	0	0	0	0	0	0	0	-0.0218483722962639	0.0191828122002686	0	0	0	0	0
1293	0	0	0	0	0	0	0	0	0	0	0	0	0	0	0	0	0	0	0	0	0	0	0	0	0	0	0	0	0	0.00754773945203412	0	0	0	0	0	0	0	0	0	0	0	0	0	0	0	0	0	0	0
1294	0	0.00392973631469328	0	0	0	0	0	0	0	0	0	0	0	0	0	0	0	0	0	0	0	0	0	0	0	0	0	0	0	0	0	0	-0.00386428626632661	0	0	0	0	0	0	0	0	0	0	0	0	0	0	0	0
1295	0	0	0	0	0.0762195121951219	-0.012278978388998	0	0	0	-0.012278978388998	0	-0.0368369351669941	0	0	0	0	0	0	0	0	0	0	0	0	0	0	0	0	0	0	0	0	0	0	0	0	0	0	0	0	0	0	0	0	0	0	0	0	0
1296	0	0	0	-0.0675219446320054	0	-0.135043889264011	0	0	0	0	0	0	0	0	-0.0675219446320054	0	0	0	0	0	0	0	0	0	0	0	0	0	0	0	0	0	0	0	-0.0675219446320054	0	-0.137672907225023	0	0	0	0	0	0	0	0	0	0	0	0
1297	0	0	0	0	0	0	0	0	0	0	0	0	0	0	0	0	0	0	0.00458589379069981	0	0	0	0.00458589379069981	0	0	0	0	-0.00449337227589306	0	0	0.00458589379069981	0	0	0	0	0	0	0	0	0	0	0	0	0	0	-0.00898674455178611	0	0	0
1298	0	-0.0061751265900951	0.137488542621448	0	0	0	0	0	0	0	0	0	0.0458295142071494	0	0	0	0	0	0	0	0.0273041344368641	0	0	0	0	-0.0061751265900951	0.0458295142071494	0	0	0	0	0	0	0	0	0	0	0	0	0	0	0	0	0	0	0	0	0	-0.0123502531801902
1299	0	-0.00747104968248039	0	0	0	-0.00747104968248039	0	0	0	0	0	0	-0.00747104968248039	0	0	0	0	-0.00747104968248039	0	-0.0149420993649608	0	-0.00747104968248039	0	0	0	0	-0.00747104968248039	0	-0.00747104968248039	0	0	0	0	0	0	0	0	0	0	0	0	0	0	0	0	0	0	0	0
1300	0	0	0	0	0.00511196804962959	0	0	0	0	0	0	0	-0.000459810282277532	0	0	0	0	0	0	0	0	0	0	0	0.00324569944823109	0	0	0	0	0	0	0	0	0	0	0	0	0	0	0	-0.000459810282277532	0	0	-0.000459810282277532	0	0	-0.00503088563276449	0	0
1301	0.265074484911081	0	0	0	0	0	0	0	0.03382949932341	0	0	0	-0.0152928582352042	0	0	0	0	0	0	0	0.10148849797023	0	0	0	0	0.03382949932341	0	0	0	0	0	-0.0305857164704083	0	0	0	0	0	0	0	0	0	0	0	0.03382949932341	-0.0152928582352042	0	0	0	-0.0305857164704083
1302	0	0	-0.0733137829912024	-0.0366568914956012	-0.0733137829912024	0	0	0.21953896816685	0	0	0	0	0.182882076671249	0	0	0.0731125925878238	-0.146627565982405	0	-0.0366568914956012	0	0	0	0	0	-0.0366568914956012	0	0.109769484083425	0	-0.0366568914956012	0	0.109769484083425	0	-0.0733137829912024	0	-0.0366568914956012	0	0	-0.0366568914956012	0	0	0.182882076671249	-0.109970674486804	0	0	0	0	-0.219941348973607	-0.109970674486804	0
1303	0	0	0	0	0	0	0	0	0	0	0	0	0	0	0	0	0	0	0	0	0	0	0	0	0	0	0	0	0	0	0	0	0	0	0	0	0	0	0	0	0	0	0	0	0	-0.0414336026517506	0	0	0
1304	0	0	0	0	0	0	0	0	0	0	0	0	0	0	0	0	0	0	0	0	0	0	0	0.0282965478211658	0	0	0	0	0	0	0	0	0	0	0.0282965478211658	0	0	0	0	0	0	0	0	0	0	0	0	0	0
1305	-0.0445831475702185	0	-0.0445831475702185	0	0	0	-0.0445831475702185	0.274470068495927	0	0	0	0	0	0	0	0	0	0	0	0	0	0	0	0	0	0	0	0	0	0	0	0	0	0	0	0	0	0	0	0	0	0	0	0	0	0	-0.0445831475702185	0	0
1306	-0.028328611898017	0	0	0	0	0	0.044842142235193	0	0	0.053098907403781	0	0	0	0	-0.028328611898017	0	0.0407137596508988	0.0649139889646219	0	0	0.235455726544764	0	0	0.19887034947816	0	0	0.23132734396047	0	-0.0159434641451352	0	0	0	-0.028328611898017	0	0	0	-0.113314447592068	0.0365853770666049	-0.084985835694051	-0.056657223796034	0	0	0	0	0.357597005497461	0	0.202998732062453	-0.028328611898017	0
1307	0.0875656742556918	0	0	0	-0.0264900662251656	0	0	-0.0264900662251656	0	-0.0264900662251656	0	0.0875656742556918	0	0	0	0	0	0	0	0	0	0	0	0	0	0	0	0	0.175131348511384	0	0	0.175131348511384	0	0	-0.0529801324503311	0	0	0	0.0875656742556918	0	-0.0264900662251656	0	0	0	0	0	-0.0264900662251656	0	0
1308	-0.0662251655629139	0	0	0.153964588144727	0	0	-0.0662251655629139	0	0	0	0	0	0	0	0	0	0	0	0	0	0	0	0	0	0	-0.0662251655629139	0	-0.0662251655629139	0	0	0	0	0	0	0	0	0	0	0	0	0	0	0	0	0	0	0	0	0
1309	0	0	0	0.0508517670989067	0	0	0	0	0	0	0	0	0	0.0127129417747267	0	0	0	0	0	0	0.0254258835494533	0	0	0	0	0	0	0	0	0	0	0	0	0	0	0	0	0	0	0	0	0	0	-0.00667824228663016	0	0	-0.00667824228663016	0	0
1310	0	0	0	0	0	0	0	0	0	0	0	-0.00963020030816641	0	0	0	0	0	0	0	0	0	0	0	0	0	0	0	0	0	0.00880979649370099	0	0	0	-0.00963020030816641	0	0	0.017619592987402	0	0	0	0	0.00880979649370099	0	0	0	0	0	0	0
1311	0	0	0	0	0	0	0	0	0	0	0	0	0	0	0	0	0	0	0	0	0	0	0	0	0	0	0	0	0	0	0	0	0	0	0	0	0	0	0	0	0	0	0	0	0	0	0	0	0
1312	0	0	0	0	0	0	0	0	0	-0.0338180588434224	0	0	0	0	0	0	0	0	0	0	0	0	0	0	0	0.0736105999263894	0	0	0	0	0	0	0	0	0	0	0	0	0	0	0	0	0	0	0	0	0	0	0
1313	0	0	0	0	0	0	0	0	0	0	0	0	0	0	0	0	0	0	0	0	0	0	0	0	0	0	0	0	0	0	0	0	0	0	0	0	0	0	0	0	0	0	0	0	0	0	0	0	0
1314	0	0	0	0	0	0	0	0	0	0	-0.0125849484017116	0	0	-0.0125849484017116	0	0	0	0	0	0	-0.0125849484017116	0	0	0	0	-0.0125849484017116	0	0	0	0	0	0	0	0	0	0	0	0	0	0	0	0	-0.0125849484017116	0	0	0	0	0.0151619994340265	0
1315	0	0	0	0.0121373953149654	0	0	0	0	0	0	0	0	0	0	0	0	0	0	0	0	0	0	0	0	0	0	0	0.0018472121497051	0	0	0	0	0	0	0	-0.0205803663305207	0	0	0	0	0	0.0242747906299308	0	-0.0102901831652603	0	0	0.0242747906299308	0	-0.0102901831652603
1316	0	0	0	0.0314836678473042	0.0089811026303023	-0.0219474723827639	0	0	0	0	0	0	0.0157418339236521	0.0016652785027143	-0.00731582412758797	0	0.33168869806517	0	0.0314836678473042	-0.00731582412758797	0	0	0	0.0550964187327824	0	0	0.00787091696182605	0	0	0.00787091696182605	0	0	0	0	0	0	0	0	-0.00731582412758797	0	0	0	0	0	0	0.00787091696182605	0	0	0
1317	0	0	0	0	0	0	0	0	0	0	0	0	0	-0.00395491398062092	0	0	0	0	0.0022715561578762	0	0	0	0	0	0	0	0	-0.00395491398062092	0	0	0	0	0	0.0130005200208008	0	0	0	0	0	0	0	0	0.0231819041399188	0	0	0	0	0	0
1318	0	0	0.0283527076835838	0	0.073519960785167	0	0	0.969271061647809	0.0098906011572291	0	-0.027693159789532	0.0283527076835838	0.110444173837876	0	0.0524196626826048	0	0	-0.0135168059477401	-0.0461552663158866	-0.00923105326317733	0	0	0	0.079124809257833	0.0141763538417919	-0.0959367374222843	0	0	0.152313687469199	0	0.0382433088408129	0	0	0.0616507159457822	0	0	0	0	-0.027693159789532	0	0.0141763538417919	0	0	0.00494530057861457	0	0	0	0	0
1319	0	0	0	0	0	0	0	0	0	0	0	0	0	0	0	0	0	0	0	0	0	0	0	0.0261643118785976	0	0	0	0.0130821559392988	0	0	0	0	0	0	0	0	0	0	0	0	0	0	0	0	0.0392464678178964	0	0	0	0
1320	0	0	0	0	0	0	0	0	0	0	0	0	0	0	0	0	0	0	0	0	0	0	0	0	0	0	0	-0.0209907640638119	0	0	0	-0.0629722921914358	0	0	0	0	0	0	0	0	0	0	0	0	0	0	0	0	0
1321	0	0	0	0	0	0	0	0	0	0	0	0	0	0	0	0	0	0	0	0	0	0	0	0	0	0	0	0	0	0	0	0	0	0	0	0	0	0	0	0	0	0	0	0	0	0	0	0	0
1322	-0.0911577028258888	0.326797385620915	0	0	0	0	0	0	0	0.65359477124183	0	-0.0911577028258888	0	0.144481979969137	0	0	0	0	0	0	0.326797385620915	0	0	0	0	-0.0911577028258888	0	0	0.65359477124183	0	0	0	0	0	0	0	-0.0911577028258888	0.326797385620915	0	0	0	0	0	-0.273473108477666	0	0	-0.273473108477666	0.326797385620915	0
1323	0	0	0	0	0.00667779632721202	0	0	-0.0062445360309729	0	0	0	0	0.013355592654424	0	0	0.0342555022285383	0.00667779632721202	0	0	0	0	0	0	-0.0062445360309729	0	0	0	-0.0124890720619458	0.00667779632721202	0	0	0	0	0	0	0	0	0	0	0	0	0	0	0	0	0	0	0	0
1324	0	0	0	0	0	0	0	0	0	0	0	0	0	0	0	0	0	0	0	0	0	0	0	0	0	0	0	0	0	0	0	0	0	0	0	0	0	0	0	0	0	0	0	0	0	0	0	0	0
1325	0	0	-0.0200561572402728	0	0	0.0194071418915346	0	0	0	0.0394632991318074	-0.0200561572402728	0	0	0	0	0.0789265982636148	-0.0200561572402728	0	0	0.0789265982636148	0	0	-0.0200561572402728	0	0	0	0	0	0.0789265982636148	0	-0.0401123144805455	0	0	0	0.0394632991318074	0	0	0	0	0	0	0	0.0394632991318074	0	0	0	0	-0.0200561572402728	-0.0802246289610911
1326	0	0	0	0	0	0	0	0	0	0	0	0	0	0	0	0	0	0	0	0	0	0	0	0	0	0	0	0	0	0	0	0	0	0	0	0	0	0	0	0	0	0	0	0	0	0	0	0	0
1327	0	0	0	0	0	0	0	0	0	0	0	0	0	0	0	0	0	0	0	0	0	0	0	0	0	0	0	0	0	0	0	0	0	0	0	0	0	0	0	0	0	0	0	0	0	0	0	0	0
1328	0	0	-0.00181475029036005	0	0	0	0	0	0	0	0	0	0	0	0	0	0	0	0	0	0	0	0	0	0	0	0	0	0	0	0	0	0	0	0	0	0	0	0	0	0	0	-0.00362950058072009	0	0.00891941310261785	0	0	0	0
1329	0	0	0	0	0	0	0	0	0	0	0	0	0	0	0	0	0	0	0	0	0	0	0	0.00879120879120879	0	0	0	0	0	0	0	0	0	0	0	0	0	-0.0181603559429765	0	-0.0181603559429765	0	0	0	0	0	0	0	0	0
1330	0	0	0	0	-0.0460935699469924	0	-0.0230467849734962	0	-0.0230467849734962	0.0315556958030925	0	0	0	0	-0.0230467849734962	0	-0.0460935699469924	0	0.0631113916061849	-0.0145378741438999	0	0.0085089108295963	-0.00602896331430371	0.0315556958030925	0	-0.0230467849734962	-0.115233924867481	-0.0230467849734962	0	-0.0921871398939848	-0.0460935699469924	0	-0.0230467849734962	0	0	0	0	0	-0.0230467849734962	0	0	-0.0691403549204886	0	-0.0460935699469924	0	0	0	0	0
1331	0	0	0	0	0	0	0	0	0	0	0	0	0	0	0	0	0	0	0	0	0	0	0	0	0	0	0	0	0	0	0	0	0.0951474785918173	0	0	0	0.0951474785918173	0	0	0	0	0	0	0	0	0.0951474785918173	0	0	0
1332	0	0	0	0	0	0	0	0	0	0	0	0	0	0	0	0	0	0	0	0	0	0	0	0	0	0	0	0	0	0	0	0	0	0	0	0	0	0	0	0	0	0	0	0	0	0	0	0	0
1333	0	0	0	0.113378684807256	-0.066711140760507	0	0	0	0	0	0	0	0	0	0	0	0	0	0	0	0	0	0	0	0.113378684807256	0	0	0	0	0	0	0	-0.066711140760507	0	0	0	0	0	0	0	0	0	0	0	0	0	0	0.113378684807256	0
1334	0	0	0	0	0	0	0	0	0	0	0	0	0	0	0	0	0.0271076172404446	0	0	0.29818378964489	0	0.0286593949715612	0	0	0.0271076172404446	0	0	0	0	0	-0.0255558395093279	0	0	0.0271076172404446	0	0	0	0	0	0	0	-0.0255558395093279	0	0	0	-0.0255558395093279	0	0	0
1335	0	0	0	0	-0.00171080544720454	0.00346032734696702	0	-0.00171080544720454	0	0	0	0	0	0	0.0103809820409011	0	0	0	0	0	-0.00171080544720454	0	0	0	0	0	0.00346032734696702	0	0	0	0	0	0	0	0	0	0	-0.00171080544720454	0	0	0	0	0	-0.00342161089440909	0	0	0	0	0
1336	0	0	0	0	0	0	0	0	0	0	0	0	0	0	0	0	0	0	0	0	0	0	0	0	0	0	0	0	0	0	0	0	0	0	0	0	0	0	0	0	0	0	0	0	0	0	0	0	0
1337	0.00254673254214842	0	0	0	0	0	0	0	0	-0.00173034330011074	0	0	0	0	0.00081638924203768	0	0	0	-0.00173034330011074	0	0	0	0	0	0	0	0	0	0	0	0	0	0	0	0	0	0	0	0	0	0	0	-0.00173034330011074	0	0	0	0	0	0
1338	0	0	0	0	0	0	0	0	0	0	0	0	0	0	0	0	0	0	0	0	0	0	0	0	0	0	0	0	0	0	0	0	0	0	0	0	0	0	0	0	0	0	0	0	0	0	0.0337894914681534	0	0
1339	0	0	0	0	0	0	0	0	0	0	0	0	0	0	0	0	-0.0893921334922527	0	0	0	0	0	0	0	0	0	0	0	0	0	0	0	0	0	0	0	0.016311843690546	0.143657276858823	-0.0297973778307509	0	0.032623687381093	0	0	0	0	0	0	0	0.0338753387533875
1340	0	0	0	0	0.130890052356021	0	0	0	0	0	-0.0200120072043226	0	0	0	0	0	0.261780104712042	-0.0200120072043226	0	0.392670157068063	0.221756090303397	0	0.130890052356021	0	-0.0600360216129678	0	0.0908660379473758	0	0	-0.0200120072043226	0	0	0	0	0	0	-0.0200120072043226	0	0	0	0	-0.0200120072043226	0	0	0	0	0.130890052356021	-0.0200120072043226	0
1341	0	0	0	0	0	0.037037037037037	0	0	0	0	0	0	0	0	0	0	0	0	0	0	0	0	0	0	0	0	0	0	0	-0.0224719101123595	0	0	0	0	-0.0224719101123595	0	0	0	0	0	0	0	0	0	0	0	0	-0.0224719101123595	0
1342	0	0	0	0	0	0	0.00833611203734578	0	0	-0.0099009900990099	0	0.0166722240746916	0	0.0250083361120373	0	0	0	0	0	0	0	-0.0099009900990099	0	0	0	0	0	0	0	0	0.0333444481493831	0	0	0	0	0	0.0250083361120373	0	0	0	0	0	0	0	-0.0099009900990099	0	0	0.00833611203734578	0
1343	0.0837334300168764	0.016200972192891	-0.122704871617088	-0.118318229644595	-0.319765866348707	-0.183842759667264	-0.316841438367045	0.0477447255452	0.025090874431626	0.074785218631267	0.119663825341679	-0.239502578123977	-0.05127317648422	-0.138476748293242	0.258082264488048	-0.032576871826403	-0.292667064115766	0.031972848869045	-0.129157750537771	-0.113873278525227	-0.150778483177251	-0.027157111379815	-0.207958824771669	-0.290230040797714	-0.138047652776506	0.049206939536031	0.314716892271983	-0.236519840995442	-0.165088145862574	-0.089269808757212	0.285610162237726	-0.022224755596837	0.034897276850708	0.032947658196267	-0.030081539361477	0.157602148467797	-0.208991943245763	-0.154248624969397	-0.015342781159418	-0.00499066492985101	0.148224841565451	-0.20156425499786	-0.064120625178712	-0.189749924777463	-0.164600741198963	-0.143409104076221	-0.091706832075263	0.16198879044029	-0.00645287892068197
1344	0	0	0	0	0	0	0	0	0	0	0	0	0	0	0	0	0	0	0	0	0	0	0	0	0	0	0	0	0	0	0	0	0	0	0	0	0	0	0	0	0	0	0	0	0	0	0	0	0
1345	0	0	0	0	0	0	0	0	0	0	0	0	0	0	0	0	0	0	0	0	0	0	0	0	0	0	0	0	0	0	0	0	0	0	0	0	0	0	0	0	0	0	0	0	0	0	0	0	0
1346	0	0.0693721817551162	0	0	0	0	0	0	0	0	0	0	0	0	0	0	0	0	0	0	0	0	0	0	0	0	0	0	0	0	0	0	0	0	0	0	0	0	0	0	0	0	0	0	0	0	0	0	0
1347	0	0	-0.00854408749145591	0	0	-0.00854408749145591	0	0	0	0	0.0201450443190975	0	0	0	-0.0170881749829118	0	0	0	0	0	0	0	0	0.0317460011467391	0	0	0	0.0116009568276416	0	0	-0.0256322624743677	-0.00854408749145591	0.0604351329572925	0	0	0.0116009568276416	0	0	0	0	0.0580047841382084	0	0	0	0	0	-0.159280793001476	-0.0170881749829118	0
1348	0	0	0	0	0	0	0	0	0	0	0	0	0	0	0	0	0	0	0	0	0	0	0	0	0	0	0	0	0	0	0	0	0	0	0	0	0	0	0	0	0	0	0	0	0	0	0	0	0
1349	0	0	0	0	0	0	0	0	0	0	0	0	0	0	0	0	0	0	0	0	0	0	0	0	0	0	0	0	0	0	0.893396876954336	0	0	0	0	0	-0.0255004462578095	0	0	0.0399520575309628	0	0	0	0	0	0	0	0	0
1350	0	0	0	0	0	0	0	0	0	0	0	0	0	0	0	0	0	0	0	0	0	0	0	0	0	0	0	0	0	0	0	0	0	0	0	0	0	0	0	0	0	0	0	0	0	0	0	0	0
1351	0.014845403044161	-0.354924578527063	-0.029463290332855	-0.354924578527063	-0.266193433895297	-0.384501626737652	0.133153595886515	-0.147885241052943	-0.133039838008782	-0.0591540964211772	-0.20703933747412	0.236730143562442	-0.133039838008782	-0.236616385684709	0.295884239983619	-0.0295770482105886	0.133153595886515	0.059267854298911	0.399460787659546	0.236730143562442	-0.118308192842354	-0.0295770482105886	0.029690806088322	0.576923076923077	-0.0295770482105886	0	0.133153595886515	0.31072964302778	-0.236616385684709	-0.295770482105886	0.044422451254749	0.355152094282529	0.133153595886515	0	0.399460787659546	-0.147885241052943	-0.35481082064933	-0.369542465815758	-0.0591540964211772	-0.0887311446317657	0.133153595886515	-0.118308192842354	0.236730143562442	-0.118308192842354	-0.073885741587605	1.52372989329511	-0.0295770482105886	0.029690806088322	-0.177462289263531
1352	0	0	0.0372300819061802	0.0744601638123604	0.0372300819061802	0	0	0	0	0	0	0	0.0372300819061802	0	0	0	0	0	0	0	0	-0.0341296928327645	0.0372300819061802	-0.136518771331058	-0.0341296928327645	0	-0.068259385665529	0	0	-0.0341296928327645	0	0	0	0	0	0	0	0	0	0	0	0	0	0	0	0	0	0	0
1353	0	0	0	0	0	0	0	0	0	0	0	0	0	0	0	0	0	0	0	0	0	0	0	0	0	0	0	0	0	0	0	0	0	0	0	0	0	0	0	0	0	0	0	0	0	0	0	0	0
1354	-0.00931112612995734	-0.00444148345547413	0	0.003585165017456	0	-0.00042815921900907	0.00802664847293013	0.00401332423646506	0	0	0	0	-0.00888296691094826	0	0	0	0	0.00401332423646506	0	0	0	-0.00444148345547413	-0.00888296691094826	0	0	-0.00444148345547413	0	-0.0177659338218965	0	0	0	0	0	0	0	-0.00444148345547413	0	0	0	0	0	0	0	0	0	0	0	0	0
1355	0	0	0.0126143172500788	0	0	0	0.00630715862503942	0	-0.0129794276072425	0	0	0.0437850000181123	0	0.0378429517502365	0	0	0	0	-0.00018255517858184	0	0	0	0	0	0	0	-0.0915862139650253	0	0.00630715862503942	-0.00648971380362126	0	0	0	0	0.0126143172500788	0.303856955001315	0.0252286345001577	0.197082641358133	0.00630715862503942	0.219107555269143	-0.00018255517858184	0.0489968275716609	0	0	0.0729475758217451	0.00630715862503942	-0.000547665535745499	0.0126143172500788	0
1356	0	0	0	0	0	0	0	0	0	0	0	0	0	0	0	0	0	0	0	0	0	0	0	0	0	0	0	0	0	0	0	0	0	0	0	0	0	0	0	0	0	0	0	0	0	0	0	0	0
1357	0	0	0.182846859467797	0	0	0.093984962406015	0	0	0	0	0	0	0	0	0	0	0	0	0.0888618970617822	0	0	0	0	0	0	0	0	0	0	0	0	0	-0.0991080277502478	0	0	0	0	0	0	-0.198216055500496	0	0	0	0.182846859467797	0	0	0	0	0
1358	0	0	0	0	0	0	0	0	0	0	0	0	0	0	0	0	0	0	0	0	0	0	0	0	0	0	0	0	0	0	0	-0.00745323097562794	0	0	0	0	0	0	0	0	0	0.0299820107935239	0	0	0	0.0099940035978413	0	0.119928043174096	0
1359	0	0	0	0	0	0.0168861870989531	0	0.0168861870989531	0	0	0	0	0	0	0	0	0	0	0	-0.0161459594736417	0	0	-0.00807297973682086	0	0	0	0.0675447483958122	0	0	0	0	0	0	0	0.0168861870989531	0	0	0	0	0	0	0	0	0	-0.00807297973682086	0	0	0	0
1360	0	0	0	0	0	0	0	0	0	0	0	0	0	0	0	0	0	0	0	0	0	0	0	0	0	0	0	0	0	0	0	0	0	0	0	0	0	0	0	0	0	0	0	0	0	0	0	0	0
1361	0	0	0	0	0	0	0	0	0	0	0	0	0	0	0	0	0	0	0	0	0	0	0	0	0	0	0	0	0	0	0	0	0	0	0	0	0	0	0	0	0	0	0	0	0	0	0	0	0.112233445566779
1362	0	0	0	0	0	0	0	0	0	0	-0.01478633742422	0	0	0	0	0	0.0905592030790129	0	0	0	0	0	0	0	0	0	0	0.0452796015395064	0	0.0226398007697532	0	0.0226398007697532	0	0	0	0	0	0	0	0	0	0	0	0	0	0	0	0	0
1363	0	0	0.0778816199376947	0.155763239875389	0	0.0778816199376947	0	0	0	0	0	0	0	0	0	0	0	0	0	0	0	0	0	0	0	0	0	0	0	0	0	0	0	0	0	0	0	0	0	0	0	0	0	0	0	0	0	0	0
1364	0	0	0	0	0	0	0	0	0	0	0	0	0	0	0	0	0	0	0	0	0	0	0	0	0	0	0	0	0	0	0	0	0	0	0	0	0	0	0	0	0	0	0	0	0	0	0	0	0
1365	0	0	0	0	0	0	0	0	0	0	0	0	0.0903750564844103	0	0	0	0	0.0333195007083812	0	0	0	0	0	0	0	0	-0.0118680275338239	0	0	0	0	0	0	0	0	0	0	0	0	0	0	0	0	0	0	0	0	0	0
1366	0	0	0	-0.00702148574638393	-0.0140429714927679	0	0	0	0	0	0	0	0	0	0	0	0	0	0.0481579581025764	0	0	0	0	0	-0.0210644572391518	0	0	0	0	0	0	0	0	0	0	0	0	0	0	0	0	0	0	0	0.00501800377926017	0	0	-0.0040069639342475	0
1367	0	-0.0251004016064257	0	-0.0376506024096386	0	0	0	0	0	0	0	0	0	0	0	0	0	0	0	0	0	0	0	0	0	0	0	0	0	0	0	0	0	0	0	0	0	0	0	0	0	0	0	0	0	0	0	0	0
1368	0	0	0	0	0	-0.0210084033613445	0	0	0	0	0	0	-0.0420168067226891	0	0	0	0	0	0	0	0	0	0	0	0	0	0	0	0.0250438266967193	0	0	0	0	0	0	0	0	0	0	0	0	0	0	0	0	0	0	0	0
1369	0	0	0	0	0	0	0	0	0	0	0	0	0	0	0	-0.00470101541933058	0	0	0	0	0	0	0	0	0	0	0	0	0	0	0	0	0	0	0	0	0	0	0	0	0	0	0	0	0	0	0	0	0
1370	0	0	0	0	0	0	0	0	0	0	0	0	0	0	0	0	0	0	-0.00763475339746526	0	0	0	0	0	0	0	0	0	0	0	0	0	0	0	0	0	0	-0.0121853382663775	0.00917683766174176	0	0	0	-0.0030085006046357	0	0	0	0	0	0
1371	0	0	-0.00795102170628926	0	0	-0.00795102170628926	0	-0.00795102170628926	0	0	0	0	0	0	0	-0.00795102170628926	0	0	0	0	0	0.0495202426615268	0	0	-0.0238530651188678	0	-0.00795102170628926	-0.0159020434125785	0	0	0	0.0686773307841322	0	0	0	0	0	0	0	0	0	0	0	0	0	0	0	0	0
1372	0	0	0	0	0	0	0.0883652430044183	0	0	0	0	0	0	0	0	0	0	0	0	0	0	0	0	0	0	0	0	0	0	0	0	0	0	0	0	0	0	0	0	0	0	0	0	0	0	0	0	0	0
1373	0	0.0445632798573975	0.5749622389429	0.0445632798573975	0	0	0	0	0	0	0	0.490196078431373	0.0445632798573975	0	0.793418239026619	0	0	0	0.089126559714795	0	0	-0.00815394651011089	0	0.133689839572193	0	0	0	0	0	0.133689839572193	0	0.17825311942959	0	0.0445632798573975	0	-0.0163078930202218	0	0	-0.00815394651011089	0.0445632798573975	0	0	0	0	0.133689839572193	0	0	0.0364093333472866	0
1374	0	0	0	0	0	0	0	0	0	0	0	-0.0043917435221783	0	0	0	0	0	0	0	0	0	0	0	0	0	0	0	0	0	0	0	0	0	0	0	0	0	0	0	0	0	0	0	0	0	0	0	0	0
1375	0	0	0	0	0	0	0	0	0	0	0	0	0	0	0	0	0	0	0	0	0	0	0	0	0	0	0	0	0	0	0	0	0	0	0	0	0	0	0	0	0	0	0	0	0	0	0	0	0
1376	0	0	0	0	0	0	0	0	0	0	0	-0.00173840483971907	0	0	-0.00173840483971907	0.0042951636457349	-0.00173840483971907	0	0	0	0	0	0	0	0	0	0	0	0	-0.00347680967943815	0	0	0	0	0	0	0	0	0	-0.00173840483971907	0	0	0	0	0	0	0	0	0
1377	0	0	0	0	0	0	0	0	0	0	0	0	0	0	0	-0.00992555831265509	0	0	0	0	0	-0.0198511166253102	0	0	0	0	0	0	0	-0.00992555831265509	0	0	0	0	0	0	0	0	0	0	0	0	0	0	0	0	0	0	0
1378	0	0	0	0	0	-0.00541565123206066	0	0	0	0	0	0	0	0	0	0	0	0	0	0	0.04510599909788	0	0	0	0	0	0	0	0.0300706660652533	0	0	0	0	0	0	0	0	-0.00541565123206066	0.0300706660652533	0	0	0	0	0	0	0	0	0	0.0150353330326267
1379	0	-0.0044907490569427	0	0	0	0	0	0	0	0	0	0	0	0	0	0	0.00643128175445366	0	0	0	0	0	0	0	0	0	0	0	0	0	0	0.0083718144519646	0	0	0	0	0	0	0	0	0	0	0	0	0	0	0	0	0
1380	0	0	0	0	0	0	0	0	0	0	0	0	0	0	0	0	0	0	0	0	0	0	0	0	0	0	0	0	0	0	0	0	0	0	0	0	0	0	0	0	0	0	0	0	0	0	0	0	0
1381	0	0	0	0	0	0	0	0	0	0	0	0	0	0	0	0	0	0	0	0	0	0	0	0	0	0	0	0	0	0	0	0	0	0	0	0	0	0	0	0	0	0	0	0	0	0	0	0	0
1382	0	0	0	0	0	0	0	0	0	0	0	0	0	0	0	0	0	0	0	0	0	0	0	0	0	0	0	0	0	0	0	0	0	0	0	0	0	0	0	0	0	0	0	0	0	0	0	0	0
1383	0	0	0	0.00521593991237221	0	0	0	0	0	0.00521593991237221	0	0	0	0	0	0	-0.00050946945439751	-0.00286270468338486	-0.00858811405015459	0	0	0	-0.00286270468338486	0	0	0	0	-0.00572540936676972	0	-0.00286270468338486	0	0	0	0	0	-0.00286270468338486	-0.00572540936676972	0	0	0	0	0	0.00235323522898735	0	0	0	0	0	0
1384	0	0	0	0	0	0	0	0	0	0	0	0	0	0	0	0	-0.0433463372345037	0	0	-0.0433463372345037	0	0	0	0	0	0	0.0863185153215365	0	0.0431592576607682	0	-0.0866926744690074	0	0	0	0	0	0	0	0	0	0	0	0	0	-0.0866926744690074	0	0	0	0
1385	0	0	0	0	0	0	0	0	0	0	0	0	0	0	0	0	0	0	0	0	0	0	0	0	0	0	0	0	0	0	0	0	0	0	0	0	0	0	0	0	0	0	0	0	0	0	0	0	0
1386	0	0	0	0	0	0	0	0	0	0	0	0	0	0	0	0	0	0	0	0	-0.0142694063926941	-0.0570776255707763	-0.0142694063926941	0	0	0	0	0	0	0	0	0	0	0	0	0	0	0	0	0	0	0	0	0	0	0	0	0	0
1387	0	0	0	0	0	0	0	0	0	0	0	0	0	0	0	0.0605143721633888	-0.0525486074619023	0	0	0	-0.0175162024873008	0	0	0	0	0	0	0	0	0	0	0	0	0	0	0	0	0	0	0.0732553557577824	0.0605143721633888	0	0	0	0	0	0	0	0
1388	0	0	0	0	0	0	0	0	0	0	0	0	0	0	0	0	0	0	0	0	0	0	0	0	0	0	0	0	0	0	0	0	0	0	0	0	0	0	0	0	0	0	0	0	0	0	0	0	0
1389	0	0	0	0	0	-0.00320965464116061	0	0	0	0	0	0	0	-0.00962896392348183	0	0	0	0.00331961226928695	0	-0.00320965464116061	0	0	0	0	-0.00962896392348183	0	0	0	0	0	0	0	0	-0.0416155527069617	0	-0.0256772371292849	0	0	0	0	0	0	0	0	0	0	0	0	0
1390	0	0	0	0	0	0	0	0	0	0	0	0	0	0	0	0	0	0	0	0	0	0	0	0	0	0	0	0	0	0	0	0	0	0	0	0	0	0	0	0	0	0	0	0	0	0	0	0	0
1391	0	0	0	0	0	0	0	0	0	0	0	0	0	0	0.00328030178776447	0	-0.00296142740801066	0	0	0	0	0	0	0	0	0	0	0	0	0	0	0	0	0	0	0	0	-0.00148071370400533	0	-0.00148071370400533	0	0.00328030178776447	0	0	0	0.00328030178776447	0	0	0
1392	0	-0.0171880371261602	0	-0.0171880371261602	0	0	0	0	0	0	0	0	0	0	0	0	-0.0171880371261602	0	0	0	0.0060030574935058	0	0	0	0	0	-0.0171880371261602	0	0	0	0	0	0	0	0	0	0	0	0	0	0	-0.0171880371261602	0	0	0	0	0	0	0
1393	0	0	-0.0653310104529617	0	0	-0.737458566269235	0	0	0	-0.239547038327526	0	0	0	-0.130662020905923	-0.279523079206452	0	0.0035779660897159	0	-0.857695895852037	-0.0363980747892092	0	-0.0146210713048887	-0.0328201086994935	1.66989419821755	-0.159904163515701	-0.0217770034843206	-0.0181990373946046	0	0	3.58136736612223	0.441149967135719	0.0143118643588638	1.74556155515193	0.148242644408479	0.028623728717728	-0.740418118466899	0.0822932200634671	0	0	0.0614438374172213	0	0.82942554650119	0.0289329356637524	0	-0.110121845205702	0.0253549695740365	0	-0.101729085242171	0
1394	0	0	0	0	0	0	0	0	0	0	0	0	0	0	0	0	0	0	0	0	0	0	0	0	0	0	0	0	0	0	0	0	0	0	0	0	0	0	0	0	0	0	0.0460882590160157	0	0	0	0	0	0
1395	0	0	0	0	0	0	0	0	0	0	0	0	0	0	0	0	0	0	0	0	0	0	0	0	0	0	0	0	0	0	0	0	0	0	-0.0382116927779901	0	0	0	0	0	0.038974752695216	0	0	-0.0382116927779901	-0.0764233855559801	0	0	0	0
1396	0	0	0	0	0	0	0	0	0	0	0	0	0	0	0	0	0	0	0	0.024612355402412	0	0.024612355402412	0	0	0	0	0	0	0	0	0	0	0	0	0	0	0	0	0	0	0	0.024612355402412	0	0	0	0	0	0	0
1397	-0.0116904372223521	0	0	0	0	0	0	0	-0.0116904372223521	0	0	0	0	0	0	0	0	0	0	0	0	0	0	0	0	0.032626427406199	0	0	0	0	0	0	0	0	0	0	0	-0.0116904372223521	0	0	0	0	0	0	0	0.086188844996245	0	0	0
1398	0	0	0	-0.0123107226394189	0	0	-0.0123107226394189	0	0.0070204198311011	0	0.0421225189866064	-0.0123107226394189	0	0	0.110696552014802	0.01933114247052	0	0	0	0	0	0	-0.0105806056166357	0	0	0	0	0	0	0.0070204198311011	0	-0.0052903028083179	0	0	0	0	0.07732456988208	0.05799342741156	0	0.328529470258872	0	0.0913654095442821	0	0.0280816793244043	0	0	0.0070204198311011	0.05799342741156	0.0474128217949243
1399	-0.0153350713080816	0	0.0175039383861369	-0.0416674797681341	-0.0613402852323263	-0.0131662042300263	0	-0.0613402852323263	-0.0306701426161632	-0.0285012755381078	-0.0766753565404079	-0.0306701426161632	0	-0.0460052139242447	0	0	0	0	0	0	0	0	-0.0306701426161632	0	-0.0613402852323263	-0.0153350713080816	0	0	0	0	0	0	0	0	0	0	0	0	0	0	0	0	0	0	0	0	0	0	0
1400	0	0	0	0	0	0	0	0	0	0	0.0114995400183993	0	0	0	0	0	0	0	0	0	0	0	0	0	0	0	0	0	0	0	0	0	0	0	0	0	0	0	0	0	0	0	0	0	0	0	0	0	0
1401	0	-0.0674763832658569	0	0	0.0253485424588086	0	0	0	0	0	0	0	0	0	0	0	0	0.0760456273764259	0	0.0253485424588086	0	0	0	0	0	0	0	0	0	0	0	0	0	0	0	0	0	0.0760456273764259	0	0	-0.0674763832658569	0	0	0	0	0	0	0.0253485424588086	0
1402	0	0	0	0	0	0	0	0	0	0	0	0	0	0	0	0	0	0	0	0	0	0	0	0	0	0	0	0	0	0	0	0	0	0	0	0	0	0	0	0	0	0	0	0	0	0	0	0	0
1403	0	0	0	0	0	0	0	0	0	0	0	0	0	0	0	0	0	0	0	0	0	0	0	0	0	0	0	0	0	0	0	0	0	0	0	0	0	0	0	0	0	0	0	0	0	0	0	0	0
1404	0	-0.177432809237738	0.0068516299783647	0	0	0.0196540880503145	0	0.0402089779854085	0	0	-0.0187532861655349	0	0	0	0	-0.153629496863398	0	-0.146777866885033	0	0.00865323374792361	0	-0.0384073742158494	0	0	0	0.0265057180286791	-0.0256049161438996	0	0	-0.0256049161438996	0	0	-0.0315557442374848	-0.0256049161438996	0	-0.195285293518494	-0.0128024580719498	0	-0.0640122903597491	0	0	0	0	0.0393081761006289	0	0	0	0	0
1405	0	0	0	0	0	0	0	0	0	0	0	0	0	0	0.0221018897115703	0	0	0	0	0	0	-0.0540832882639264	0	-0.0324499729583559	0	0	0	-0.0216333153055706	0	0	0	0	0	0	0	0	0	-0.0108166576527853	0	0	0	0	0	0	0	0	0	0	0
1406	0	0	0	0	0	0	0.0335345405767941	0	0	0	0.0670690811535882	0	0	0	0	0	0.0335345405767941	0	0	0	0	0	0	0	0	0	0	0	0	0	0	0	0	0	0	0	0	0	0	0	0	0	0	0	0	0	0	0	0
1407	0	0	0	0	0	0	0	0	0	0	0	0	0	0	0	0	0	0	-0.00629207827345372	0	-0.0251683130938149	0	0	0	0	0	0	0	0	0	0	0	0	0	-0.00629207827345372	0	0	0	0	0	0	0	0	0	0	0	0	0	0
1408	0	0	0	0	0	0	0	0	0	0	0	0	0	0	0	0	0	0	0	0	0	0	0	0	0	0	0	0	0	0	0	0	0	0	0	0	0	0	0	0	0	0	0	0	0	0	0	0	0
1409	-0.0797766254487435	-0.0398883127243718	0	-0.0369063174834598	0.0275862068965517	0	0.0704565148618352	-0.224045775277499	0	0.018266096309644	-0.0521904185521918	0	0	0.649392734825252	-0.131967044000935	-0.478659752692461	0.0551724137931034	0	-0.119664938173115	0	-0.199441563621859	0.284808054688252	-0.0771687550720049	0.25870734357592	0.43950868602396	-0.033924322242549	0.0827586206896552	-0.0398883127243718	0	0.407454988102279	0.110344827586207	-0.024978336519813	0	0	0.0275862068965517	1.50978088937182	0.137931034482759	0.0551724137931034	0	0.0551724137931034	0	0	0.0275862068965517	0.026837957168205	0.0275862068965517	0.0152841010687316	0.0275862068965517	0.354890444685914	0.0827586206896552
1410	0	0	0	0	0	0	0	0	0	0	0	0	0	0	0	0	0	0	0	0	0	0	0	0	0	0	0	0	0	0	0	0	0	0	0	0	0	0	0	0	0	0	0	0	0	0	0	0	0
1411	0	0	0	0	0	0	0	0	-0.0934288383681096	0	0	0	-0.0311429461227032	0	0	0	0	0	0	0	0	0	0	0	0	0	0	0	0	0	0.0406338886631451	0	0	0	0	0	0	0	0	0	0	0	0	0	0	0	0	0	0
1412	0	0	0	0	0	0	0	0	0	0	0	0	0	0	0	0	0	0	0	0	0	0	0	0	0	0	0	0	0	0	0	0	0	0	0	0	0	0	0	0	0	0	0	0	0	0	0	0	0
1413	-0.00171839021204935	0	0	0.0018288717269202	-0.00171839021204935	0	0	0	0	-0.00171839021204935	0	-0.00171839021204935	0	0	0	0	0	0.00881291408998845	0	0	-0.00171839021204935	0.0052656521510189	0	0.0052656521510189	0	-0.00171839021204935	0	0	0	0	-0.00171839021204935	0	0.0052656521510189	0	0	0.00354726193896955	-0.00515517063614806	-0.00171839021204935	0.0018288717269202	0	0	0	0	-0.00171839021204935	0	0.0105313043020378	0	0	0
1414	-1.70068402552479	-0.543703919500098	-0.23788609775871	-0.0221289393263914	0.8634700354445	-0.47101977038283	-0.70494796609446	-0.5152629356451	-0.65830651817913	0.176222278133106	0.0979911807937286	-0.03003003003003	-0.035562264861628	1.93917337229439	0.567318911267949	-0.51613102568517	0.210202853514956	0.241814573024764	0.493906449320462	-0.035562264861628	-0.0750750750750751	-0.086934067825787	-0.116169574768301	2.15961674560401	-0.474962959039391	-0.158845763941305	-0.139880203574471	-0.488388927879374	-1.89982240937655	-2.7406779636079	-0.187294104491556	-0.045045045045045	0.180967346572442	-0.26395086904641	0.0094827801834171	0.0529461357486836	0.924368758763601	-0.104317938712843	-0.004745068439336	-0.848756644934987	-0.035562264861628	-0.03003003003003	-0.37777365802844	0.0584783705802814	0	0	0	-0.015015015015015	0.049782756789126
1415	0	0	0	0.0363108206245461	0	0	0	0	0	0	0	-0.02211900022119	0	0	0	0	0	-0.15483300154833	0	0	0	0	0	0	0	0.0363108206245461	0	0	0	0	0	0	0	0	0	0	0	0	0	0	0	0	0	0	0	0	0	0	0
1416	0	0	0	-0.0041576584067853	0	0	0	0	0	0	0	0	0	0	0	0	0	0	0	0	0	0	0	0	0	-0.0296170851909465	0	0	0.00728836412667177	0	-0.0041576584067853	0.00364418206333588	-0.0041576584067853	0	0	-0.0166306336271412	0	0	0.0021037530329876	0	0	0	0	0	0.00364418206333588	0	0	0	0
1417	0	0	0	0	0	0	0	0	0	0	0	0	0	0	0	0	0	0	0	0	0	0	0	0	0	0	0	0	0	0	0	0	0	0	0	0	0	0	0	0	0	0	0	0	0	0	0	0	0
1418	0	0	0	0	0	0	0	0	0	0	0	0	0	0	0	0	0	0	0	0	0	0	0	0	0	0	0	-0.00446647907454554	0	0	0	0	0	0	0	0	-0.00446647907454554	0	0	0	0	0	0	0	0	0	0	0.00488925829951596	0
1419	0	0	0	0	0	0	0	0	0	0	0	0	0	0	0	0	0	0	-0.000572301740369592	0	0	0	0	0	0	0.00360237035969668	0	0	0	0	0	0	0	0	0	0	0	0	0	0	0	0	0	0	0	0	0	0	0
1420	0	0	0	0	0	0	0	0	0	0	0	0	0	0	0	0	0	0	0	0	0	0	0	0	0	0	0	0	0	0	0	0	0	0	0	0	0	0	0	-0.00198878326240006	0.00491819341795895	0	0	-0.00397756652480013	0	0	0	0	-0.00596634978720019
1421	0	0	0	0	0	0	0	0	0	0	0	0	0	0	0	0	0	0	0	0	0	0	0	0	0	0	0	0	0	0	0	0	0	0	0	0	0	0	0	0	0	0	0	0	0	0	0	0	0
1422	0	0	0	0	0	0	0	0	0	0	0	0	-0.0424929178470255	0	0	0	0	0	0	0	0	0	0	0	0	0	0	0	0	0	0	0	0	0	0	0	0	0	0	0	0	0	0	0	0.0256344527044348	0	0	0	0
1423	0	0	0	0	0	0	0	0	0	0	0	0	0	0	0	0	0	0	0	0	0	0	0	0	0	0	0	0	0	0	0	0	0	0	0	0	0	0	0	0	0	0	0	0	0	0	0	0	0
1424	-0.0237699072973615	0	1	0	-0.0713097218920846	0.154920370810554	0	-0.0713097218920846	0.5	-0.0237699072973615	0.702460185405277	0	-0.0237699072973615	-0.0950796291894462	-0.0475398145947231	0	-0.0713097218920846	-0.0475398145947231	-0.0237699072973615	-0.106548609460423	1.08361064891847	0.512300927026385	0.107380556215831	-0.118849536486808	-0.0237699072973615	-0.0713097218920846	0.5	0.131150463513192	0.75	-0.0237699072973615	-0.0475398145947231	0.428690278107915	0	0.226230092702638	0	-0.0237699072973615	0	0	-0.0237699072973615	0	0	-0.0237699072973615	0	-0.0237699072973615	0.25	0	-0.0475398145947231	0.178690278107915	-0.522937960541954
1425	-1.45028846999535	-0.0960614793467819	-0.112852249220714	0	0	0	0	-0.048030739673391	-0.01502031454709	0.1585414189457	-0.048030739673391	-1.02229517259655	-0.0648215095473232	0	0	0.0396353547364249	-0.144092219020173	0	0.873348479293096	-0.041976924684831	0	0	-0.482648966682316	0	0	-0.056426124610357	0	0	0	0	0	0	-0.073216894484289	0	0	0.172990618871226	0	0	0	0	0.187439818796753	0	0	0.0792707094728498	0	0	0	0	0
1426	0.0179694519317161	0	0	0	0	0	0	-0.0249045326249377	0	0	0	0	0	0	0	0	0	0	0	0	0	0	0	0	0	0	0	0	0	0	0	0	0	0	0	0.0179694519317161	0	0	0	0	0	0	-0.00830151087497925	0	0	0	0	0	0
1427	0	-0.0054473983581973	0	0	-0.0095646579102395	0	0	0.00345219014896458	0	0	-0.00444979425358095	0	0	0	0	0	0	0	0.0651322349952116	0	0	0	0	0	0	0	0.00378472485050337	0	0	0	-0.00411725955204216	0	0	0.0261605392519847	0.00378472485050337	0	0.00378472485050337	0	0	0	0	0	0	0	0	0	0	0	0
1428	0	0	0	0	0	0	0	0	0	0	0	0	0	-0.0373831775700935	0	0	0	0	0	0	0	0	0	0	0	0	0	-0.0373831775700935	0	0	0	0	0	0	0	0	0	0	0	0	0	0	0	0	0	0	0	0	0
1429	0	0	0	0	0	0	0	0	0	0	0	0	0	0	0	0	0	0	0	0	0	0	0	0	0	0	0	0	0	0	0	0	0	0	0	0	0	0	0	0	0	0.0399095383796727	0	0	0	0	0	0	0
1430	0	0	0	0	0	0	0	0	0	0	0	0	0	0	0	0	0	0	0	0	0	0	0	0	0	0	0	0	0	0	0	0	0	0	0	0	0	0	0	0	0	0	0	0	0	0	0	0	0
1431	0	0	0	0	0	0	0	0	0	0	0	0	0	0	0	0	0	0	0	0	0	0	0	0	0	0	0	0	0	0	0	0	0	0	0	0	0	0	0	0	0	0	0	0	0	0.0637755102040816	0	0	0
1432	0	0	0	0	0	0	0	0	0	0	0	0	0	0	0	-0.0323781771086288	0	0	0	0	0	-0.0161890885543144	0	0	0	-0.0161890885543144	0	0	0	0	0	0	0	0	0	0	0	0	0	0	-0.384835913667013	0	-0.0323781771086288	0	0	0	0	0	0
1433	0	0	0	0	0	0	0	0	0	0	0	0	0	0	0	0	0	0	0	0	0	0	0	0	0	0	0	0	0	0	0	0	0	0	0	0	0	0	0	0	0	0	0	0	0	0	0	0	0
1434	0	0	0	0	0	0	0	0	0	0	0	0	0	0	0	0	0	0	0	0	0	0	-0.00397180021844901	0	0	0	-0.00198590010922451	0	0	0	0	0	0	0	0	0	0	0	0	0	0	0	0	0	0	0	0	0	0
1435	0	0	0	0	0	0	0	0	0	0	0	0	0	0	0	-0.0619578686493185	0	0	0	0	0	0	0	0	-0.0619578686493185	0	0	0	0	0	0	0	0	0	-0.0619578686493185	0	-0.0619578686493185	0	0	0	0	-0.123915737298637	0	0	0	0	-0.185873605947955	0	0
1436	-0.0337495781302734	0	0	-0.0674991562605467	0	-0.0337495781302734	0	0	0	-0.0337495781302734	0	0	-0.134998312521093	0	0	-0.0337495781302734	0	-0.0337495781302734	0	0	0	0	0	0	0	-0.0337495781302734	0	0	0	0	0.0441696113074205	0	-0.0337495781302734	-0.134998312521093	0	-0.10124873439082	-0.0674991562605467	-0.0337495781302734	0	0	0	-0.0337495781302734	0	0	0	0	-0.0337495781302734	0	0
1437	0	0	0	0	0	0	0	0	0	0	0	0	0	0	0	0	0	0	0	0	0	0	0	0	0	0	0	0	0	0	0	0	0	0	0	0	0	0	0	0	0	0	0	0	0	0	0	0	0
1438	0	0	0	0	0	0	0	0	0	0	0	0	0	0	0	0	0	0	0	0	0	0	0	0	0	0	0	0	0	0	0	0	0	0	0	0	0	0	0	0	0	0	0	0	0	0	0	0	0
1439	0	0	0	0	0	0	0	0	0	0	0	0	0	0	0	0	0	0	0	0	0	0	0	0	0	0	0	0	0	0	0	0	0	0	0	0	0	0.0138561729250381	0	0	0	0	0	0	0	0	0	0	0
1440	-0.0144893299185627	0	0.005654152516473	0	-0.0144893299185627	-0.0019822470226074	-0.0179157951083039	-0.0434679897556881	-0.00619218137194653	-0.058080039826313	0.0238153879289013	-0.0213422602980451	-0.0393807755584111	-0.0165942970932323	-0.0268736926624558	-0.0468944549454293	-0.0636114721907238	-0.0748442053188325	-0.0575891592180645	-0.0149046386219741	-0.094034350194983	-0.0699735219619576	-0.0281951906775275	-0.0433452696036259	-0.00553143236441076	-0.0110628647288215	0	0.00144421816713379	0.00210496717466959	-0.00829714854661615	-0.0165942970932323	-0.0144893299185627	-0.0130451117514289	0.00144421816713379	0.0223711697617675	-0.0123843627438932	-0.0248914456398484	-0.0227864784651788	-0.0248914456398484	-0.0138285809110269	0.00144421816713379	-0.0110628647288215	0.00974136671374994	-0.0109401445767593	-0.0151500789260985	-0.00829714854661615	0.000783469159598	-0.0331885941864646	-0.0255521946473842
1441	0	0	0	0	0	0	0	0	0	0	0	0	0	0	0	0	0	0	0	0	0	0	0	0	0	0	0	0	0	0	0	0	0	0	0	0	0	0	0	0	0	0	0	0	0	0	0	0	0
1442	0	0	0	0	0	0	-0.014801657785672	0	0	0	0	0	0	0	0	0	0	0	0	0	0	0	0	0	0	0	0	0	0	0	0	0	0	0	0	0	0	0	0	0	0	0	0	0	0	0	0	0	0
1443	-0.00225970827166213	0	0	0	0	-0.00295221493850982	0	0	0.00156720160481444	0.0145421619123133	0	0	0	0.00357175067861227	0	0.0104963392556011	0.00313440320962889	0	0	0	0	0	0	0	0	0	0	0	0	0	0	0	0	0	0.00156720160481444	0	0.00156720160481444	0	0.00156720160481444	0	0	0	0	0	0	0	0	0	0
1444	0	0	0	0	0	0	0	0	0	0	0	0	0	0	0	0	0	0	0	0	0	0	0	0	0	0	0	0	0	0	0	0	0	0	0	0	0	0	0	0	0	0	0	0	0	0	0	0	0
1445	0	0	0	0	-0.0125667609173735	0	-0.0185348377377609	0	-0.106817467797675	0	0	-0.0438260113916577	0	0.044771922306556	0	0.0256064772921962	0	0.108236334170022	-0.00628338045868677	0	0	0	0.026237084568795	0	0	0	0	-0.00628338045868677	0	0	0	0	0	0	0	0	0	0	0.69403227550754	-0.00628338045868677	0.0064410322778365	-0.0688018814072549	0	0	0.000315303638299506	-0.00628338045868677	0	-0.0311015986551344	-0.0689595332264048
1446	-0.077435341489856	0	0	-0.0077435341489856	0	0	0	0	-0.034971616410708	0.000234128395888751	0	0.00797766254487435	0	0	-0.0077435341489856	0	0	0	0	0	0	0	-0.0077435341489856	-0.0154870682979712	0	0	0	0	0	0	-0.0309741365959424	0	0.00797766254487435	0.0244012444264006	0.0082117909407631	0	-0.070645618009082	0.0159553250897487	0.00797766254487435	-0.0077435341489856	-0.0222940888634018	0.93114098551005	-0.0056363785859868	0	0	0.00797766254487435	0	0	-0.00750940575309685
1447	0	0	0	2.6616379452872	0	0	1.47588078676608	0	0	0	0	0	0	-0.0599161174355902	0	0.0504591585025998	0	0.151377475507799	0	0	0	0.0504591585025998	0	0.22075055187638	0	0	0	0	0	0	0	0	0	0.11037527593819	0	-0.179748352306771	0	0	0	0	0	0	0	0	0	0	0	0	-0.11983223487118
1448	0	-0.00517794884186544	0	0	0	0	0	0	0	0	0	0	-0.00172598294728848	0	0	0	0	0	0	0	0	0	-0.00517794884186544	-0.00345196589457696	0.00460023921243905	-0.00172598294728848	0	-0.00172598294728848	0	0	-0.00172598294728848	0	0	-0.00690393178915392	0	0	-0.00172598294728848	0	0	0	0	-0.00172598294728848	0	0.00920047842487809	0	0	0.00460023921243905	0	0
1449	0.00469735731038892	0	0	0	0	0	0	-0.00294031167303734	0	0	0	0	0.00381883449171313	0	0	0	0	-0.00588062334607468	0	0	0	0	0	0	0	0	-0.00882093501911203	0	0	-0.00588062334607468	0	0	-0.223499393983192	-0.00294031167303734	0.0052711369120547	0	0	0	0.00381883449171313	-0.0656010864578514	-0.0217654477469471	0	0.00763766898342626	0.00329985028057803	0.00381883449171313	0	-0.0050021005273989	0	0
1450	0	0	0	0	0	0	-0.00522739153162572	0.0126859281342171	0	0	0	0.00317148203355428	0	0	0	0	0	0	0	0	0	0	0	0	0	0	0	0	0	0	0	0	0	0	0	0	0	0	0	0	0	0	0	0.00317148203355428	0	0	0	0	0
1451	0	0	0	0	0	0	0	0	0	0	0	0	0	0	0	0	0	0	0	0	0	-0.0150738619234248	0	0	0	0	0	0	0	0	0	0	0	0	0	0	-0.0150738619234248	0	0	-0.0123414560405818	0	0	0	0	0	0	0	0	0
1452	0	0	0	0	0	0	0	0	0	0	0	0	0	0	0	0	0	0	0	0	0	0	0.156995051731894	0	0	-0.0769230769230769	0	0	0	0	0	0	0	0	0	0	0	0	0	0	0	0	0	0	0	0	0	0	0
1453	-0.014752590506029	-0.00735294117647059	0.00488639139995114	0	0	0	0	0	0	0	0	0	0	0	0	0.0146591741998534	0	0	0	0	0	0	0	0	0.0195455655998045	0	0	0	0.00977278279990227	0.00488639139995114	0	0	0	0	0	0	-0.00246654977651945	0	0	0	-0.00735294117647059	0	0	0	0.00977278279990227	0	0	0	0
1454	0.0509813917919959	0.025490695895998	0	0	0	0	0	0	0	0	0.0509813917919959	0	0	0	0	0	0	0	0	0	0	0	0	0	0	0	0	0	0	0	0	0	0	0	0	0	0	0	0	0	0	0	0	0	0	0	0	0	0
1455	0	0	0	0	-0.00368320733694902	-0.000920801834237254	0	-0.000920801834237254	0	0	0	0	0	0	0	0	0	0	0	0	-0.00184160366847451	0	0	0	0	0	0	0	0	0	0	0	0	0	0	0	0	0	0	0	0	0	0	0	0	0	0	0	0
1456	0	0	0	0	0	0	0	0	0	0	0	0	0	0.00986679822397632	0	0	0	0	0	0	0	0	0	0	0	0	-0.00410399523936552	0	0	0	0	0	0	0	0	0.0386521303978652	0	0	0	0	0	0	0	0	0	0	0	0	0
1457	0	0	0	0	0	0	0	0	0	0	0	0	0	0	0	0	0	0	0	0	0	0	0	0	0	0	0	0	0	0	0	0	0	0	0	0	0	0	0	0	0	0	0	0	0	0	0	0	0
1458	0	0	0	0	0	0	0	0	0.0129802699896158	0	0	0	0	-0.00717257208434945	0	0	-0.0771852175598269	0.0187879678948822	0	0	-0.00717257208434945	0	0	0	0	0	0	0	0	0	0.0577287778637295	0	0.0205010432628991	0.0259605399792316	0	0.091558292305178	0	0	0	0	0	0.0317682378844979	0	0	0	0	0	0	0.0129802699896158
1459	0	0	0	0	0	0	0	0	0	0	0	0	0	0	0	0	0	0	0	0	0	0	0	0	0	0	0	0	0	0	0	0	0	0	0	0	0	0	0	0	0	0	0	0	0	0	0	0	0
1460	0	0	0	0	0	0	0	0	0	0	0	0	0	0	0	0	0	0	0	0	0	0	0	0	0	0	0	0	0	0	0	0	0	0	0	0	0	0	0	0	0	0	0	-0.0163786749651953	0	0	0	0	0
1461	0	-0.00871915598570058	0	0	-0.0174383119714012	0	0	0	0	0.0159667890787163	0.0319335781574325	0	0	0	-0.0450673028211878	0	-0.0101906788783855	0	0.142229578815762	0.0159667890787163	-0.00871915598570058	0.0159667890787163	0	0	0	0.0711147894078808	0	0	0.0479003672361488	0	0	0	0	0	0	0	0	0	0	0	0	0	0	0	0	0	0	0	0
1462	0	0	0	0	0	0	0	0	0	0	0	0	0	0	0	0	0	0	0	0	0	0	0	0	0	0	0	0	0	0	0	0	0	0	0	0	0	0	0	0	0	0	0	0	0.0226142017186793	0	-0.0919858441213387	0	-0.0693716424026593
1463	-0.00599304806424548	-0.0239721922569819	-0.011986096128491	0	0.0150411288179699	-0.00498770575827615	-0.006959384598644	-0.011986096128491	0.0180181499643072	0.0090090749821536	0.0139967807404297	-0.00599304806424548	0	0.0139967807404297	-0.00599304806424548	0	0	0	0.0209951711106446	-0.00599304806424548	0.00699839037021485	0	-0.0239721922569819	0	0	-0.00599304806424548	0	0.0139967807404297	-0.0239721922569819	0	-0.011986096128491	0	-0.00599304806424548	-0.00498770575827615	-0.0099754115165522	0	-0.00599304806424548	0	0	0.00100534230596937	0	0.00699839037021485	-0.0179791441927364	0.00699839037021485	-0.0239721922569819	0	-0.011986096128491	0	-0.00599304806424548
1464	0	0	0	0	0.0402576489533011	0	0	0	0	0	0	-0.0154918667699458	0	0	0	0	0	0	-0.0154918667699458	0	0	-0.0154918667699458	0	0	0	0	0	0	0	0	0	0	0	0	0	0	0	0	0	0	0	0	0	0	0	0	-0.0154918667699458	0	0
1465	0.0190023752969121	0	0	0	0	0	0	-0.0101317122593718	0	0	0	0	0	0	0	0	0	0	0	0	0	0	0	0	0	0	0	0	0	0	0.00950118764845606	0	0	0	0	0	0	0	0	0	0	0	0	0	0	0	0	0	0
1466	-0.0384837406195882	0	0.237188209759461	0.206753962784287	-0.0192418703097941	-0.0384837406195882	-0.0577256109293823	0	0.0416266236405534	0	0	-0.0384837406195882	-0.0962093515489706	0.0496761172849681	0.137835975189524	0	0	0	-0.0384837406195882	0	0.0689179875947622	-0.0962093515489706	0.0801103642601417	0.0496761172849681	-0.0769674812391764	0.0111923766653799	0.168270222164699	0	0.0496761172849681	0.168270222164699	-0.0272913639542084	-0.0384837406195882	0.137835975189524	0.0689179875947622	-0.0577256109293823	-0.0192418703097941	0	0	0.0689179875947622	0.168270222164699	-0.0192418703097941	0.137835975189524	-0.0384837406195882	0.0689179875947622	0	-0.0192418703097941	0	0	0
1467	0	0	0	0	0	0	0	0	0	0	0	0	0	0	0	0	0	0	0	0	0	0	0	0	0	0	0	0	0	0	0	0	0	0	0	0	0	0	0	0	0	0	0	0	0	0	0	0	0
1468	-0.011213276519399	0	0	0	0	-0.0336398295581969	0.0108180079044829	0.0100274706746509	0	0	0	0	-0.0224265530387979	0.0440625688477638	-0.0460389119223443	-0.0448531060775959	0	0	0	0	0	0	0	0	0	0	0	0	0	0	0	0	0	0	0.0220312844238819	0	0	0	0	0	0	0	0	0	0	0	0	0	0
1469	0	0	0	0	0	0	0	0	0	0	0	0	0	0	0	0	0	0	0	0	0.0259470679813181	0	0	-0.0870322019147084	0	0	0	0	0	0	0	0	0	0	0	0	0	0	0	0	0	0	0	0	0	0	0	0	0
1470	0	0	0	0	0	0	0	0	0	0	0	0	0	0	0	0	0	0	0	0	0	0	0	0	0	0	0	0	0	0	0	0	0	0	0	0	0	0	0	0	0	0	0	0	0	0	0	0	0
1471	0	0	0	0	0	0	0	0	0	0	0	0	0	0	0	0	0	0	0	0	0	0	0	0	0	0	0	0	0	0	0	0	0	0	0	0	0	0	0	0	0	0	0	0	0	0	0	0	0
1472	0	0	0	0	0	0	0	0	0	0	0	0	0	0	0	0	0	0	0	0	0	0	0	0	0	0	0	0	0	0	0	0	0	0	0	0	0	0	0	0	0	0	0	0	0	0	0	0	0
1473	0	0	0	0	0	0	0	0	0	0	0	0	0	0	0	0	0	0	0	0	0	0	0	0	0	0	0	0	0	0	0	0	0	0	0	0	0	0	0	0	0	0	0	0	0	0	0	0	0
1474	0	0	0	0	0	0	0	0	0	0	0	0	0	0	0	0	0	0	0	0	0	0	0	0	0	0	0	0	0	0	0	0	0	0	0	0	0	0	0	0	0	0	0	0	0	0	0	0	0.0063351282863478
1475	0	0	0	0	0	0	0	0.00740302043233639	0	0	0	0	-0.0142247510668563	0	0	0	-0.00711237553342817	0	0	0	0	0	0	0	0	0	0	0	0	0	0	0	0	0	0	0	0	0	0	0	0	0	0	0	0	0	0	0	0
1476	0	0	0	0	0	0	0	0	0	0	0	0	0	0	0	0	0	0	0	0	0	0	0	0	0	0	0	0	0	0	0	0	0	0	0	0	0	0	0	0	0	0	0	0	0	0	0	0	0
1477	0	0	0	0	0	0	-0.0212426978226235	0	0	0	0	0	-0.0106213489113117	0	-0.0106213489113117	0	0.0521104742053153	0	-0.000996270351243396	-0.0212426978226235	0	0	-0.0212426978226235	0	0	0	-0.0106213489113117	0	0	0	0	0	0	0	0	0	0	0	0.156331422615946	0	0	0.156331422615946	0	0	0	0	0	0.104220948410631	0
1478	0	0	0	0	0	0	0	0	0	0	0	0	0	0	0	0	0	0	0	0	0	0	0	0	0	0	0	0	0	0	0	0	0	0	0	0	0	0	0	0	0	0	0	0	0	0	0	0	0
1479	0	0	0	0	0	0	0	0	0	0	0	0	0	0	0	0	0	0	0	0	0	0	0	0.0233644859813084	0	0	0	0	0	0.0233644859813084	0	0	0	0	0	0	0	0	0	-0.0267952840300107	0	0	0	0	0	0.0233644859813084	0	0	0
1480	0	0	0	0	0	0	0	0	0	0	0	0	0	0	0	0	0	0	0	0	0	0	0	0	0	0	0	0	0	-0.0356760613628255	0	0	0	-0.0713521227256511	0	0	0	0	0	0	0	0	0	0	0	0	0	0	0
1481	0	0.0152068126520681	0	0	0	0.0304136253041363	0	0	0	0	0	0	0	0	0	0	0	0	0	0	0	0	0	0	0	0	0	0	0	0	0	0	0	0	0	0	0	0	0	0	0	0	0	0	0	0	0	0	-0.0022234504138794
1482	0	0	0	0	0	0	0	0	0	0	0	0	0	0	0	0	0	0	0	0	0	0	0	0	0	0	0	0	0	0	0	0	0	0	0	0	0	0	0	0	0	0	0	0	0	0	0	0	0
1483	0	0	0	0	0	-0.0171732783788425	0	0	0	0	0	0	0	0	0	0	0	0	0	0	0	0	0	0	0	0	0	0	0	0	0	0	0	0	0	0	0	0	0	0	0	0	0	0	0	0	0	0	0
1484	0	0	0	0	0	0	0	0	0	0	0	0	0	0	0	0	0	0	0	0	0	0	0	0	0	0	0	0	0	0	0	0	0	0	0	0	-0.00728544368352033	0	0	0	0	0	0	0	0	0	0	0	0
1485	-0.0170125893160939	0	0	0	0	0	0	0	0	0	0	0	0	0	0	0	0	0	0	0	0	0	0	0	0	0	-0.102075535896563	0.0390930414386239	0	0	-0.067325426757943	0	0	-0.0170125893160939	-0.0510377679482817	0	0	-0.0170125893160939	0	0	0	0	0	-0.111486331003003	-0.0340251786321878	0	0	0	0
1486	0	0	0	0	0	0	0	0	0	0.155642023346304	0	0	0	0	0	0	0	0	0	0	0	0	0	0	0	0	0	0	0	0	0	0	0	0.021767200013959	0	0	0	0	0	0	0	0	0	0	0	0	0	0	0.043534400027918
1487	0	-0.00301340967304505	0	0	0.00495613817713238	-0.00301340967304505	0	0	0	0	0	0.00991227635426476	0	0	0.00495613817713238	0	0	0	0	0.00689886668121971	0	0.00495613817713238	-0.0060268193460901	0	0	0	0	0	0	0	0	0	0	0	0	0	0.00495613817713238	0	0	-0.00301340967304505	0	0	0	0	0	0	0	0	0
1488	0.0313381385145722	0	0	0	0.0626762770291445	0	0	0	0	0	0	0	0	0	0	0	0	0	0	0	0	-0.0211954217888936	0	-0.0635862653666808	0	-0.0423908435777872	0	0	0	0	-0.0423908435777872	0	0	0	0	0	0	0	0.0414808552402509	0	0	0	0	0	0	0	0	0	0
1489	0.0607348921955664	0.0048702507892671	-1.53728033736514	-0.048416022552126	-0.101988781234064	-2.7940915263366	0	-0.0764915859255482	0	-0.106572546682787	0.0607348921955664	0.1263400351804	3.01239335583198	0.0607348921955664	-0.0108864429407145	-0.79843464409926	0	-0.270728646815143	2.35691489666473	0.0146107523678013	0.121469784391133	0.0303674460977832	0.0753456445633678	-0.0254971953085161	2.26380716098757	-0.0157566937299818	-0.36469583851394	0.0352376968870503	0	0.33089056832962	0.0303674460977832	-0.0254971953085161	-0.214864005408843	-0.0206269445192489	0	0.0048702507892671	0	0	-0.0716213351362808	-0.0363836382492305	0.0303674460977832	0	0	0.0656051429848334	0	0	0	0	-0.152983171851096
1490	-0.0183016105417277	0	0	-0.0183016105417277	0	0	0	0	0	0	0	0	0	0	0	0	0	0	-0.0732064421669107	0	0	0	0	-0.0052030423607695	0	0	-0.0183016105417277	0	0	0	0	0	0	0	0	0	0.149287292351309	0	-0.0366032210834553	-0.391865498080332	-0.0732064421669107	0	0	-0.180323621957857	0	0	0	0	0.149105367793241
1491	0	0	0	0	0	0	0	0	0	0	0	0	0	0	0	0	0	0	0	0	0	0	0	0	0	0	0	0	0	0	0	0	0	0	0	0	0	0	0	0	0	0	0	0	0	0	0	0	0
1492	0	0	0	0.0771604938271605	0	0	0	0	0	0	0	0	0	0	0	0	0	0	0.154320987654321	0	0	0	-0.0351679268507121	0	0	0	0	0	0	0	0	0	0	0	0	0	0	0	0.0385802469135802	0	0	0	0.0385802469135802	0	0	0	0	0	0
1493	0	0	0	0	0	0	0	0	0	0	0	0	0	0	0	0	0	0	0	0	0	0	0.082135523613963	0	0	0	0	-0.0344115622849277	0	0	0	0	0	-0.0688231245698555	0	-0.0344115622849277	0	0	-0.0344115622849277	0	0	0	0	0	0	0	-0.200943738862172	-0.0688231245698555	0
1494	0	-0.030362835888872	0	0	0	0	0	0	0	0	0	0	0	0	0.0846023688663283	0	0	0	0	0	0	0	0	-0.015181417944436	0	0	0	0	0	0	0	0	0	-0.015181417944436	0	0	0	0	0	0	0	0	-0.015181417944436	0	0	0	0	0	0
1495	0	0	0	0	0	0	0	0	0	0	0	0	0	0	0	0.00542343466117092	0	0	0	0	0	0	0	0	0	0	0	0	0	0	0	0	0	0	0	0	0	0	0	0	0	0	0	0	0	0	0	0	0
1496	0	0.0181198482208242	0	0	0	0	0	0	0	0	0	0	0	0	0.00181861167184971	0	0	0	0	0	0	0	0	0	0	0	0	0	0	0	0	0	0	0	0	0	0.00363722334369942	0	0	0	0	0	0	0	0	0	0.00181861167184971	0	0
1497	0	0	0	0	0	0	0	0	0	0	0	0	0	0	0	0	0	0	0	0.00782105427811669	0	0	0	0	0	0	0.00391052713905835	0	0	0	0	0	0.00782105427811669	0	0	0	0	0	0	0	0	0	0	0	0	0	0	0	0
1498	0	0	0	0	0	0	0	0	0	0	0	0	0	0	0	-0.00718803910293272	0	0	0	0	0	0	0	-0.0115989952360528	-0.0143760782058654	0	0	0	0	0	-0.050316273720529	0	0	0	0	-0.00718803910293272	0	0	-0.0287521564117309	-0.0215641173087982	0	-0.0143760782058654	0	0	0	0	0	0	0
1499	0	0	0	0	0	0	0	0	0.0158755357993332	0	0	0	0	0	0	0	0	0	0	-0.0228284442415249	0	0	0	0	0	0	-0.0114142221207625	0	0	0	0	0	0	0	0	0.0158755357993332	0	0	0	0	0	0	0	0	0	0	0	0	0
1500	0	0	0	0	0	0	0	0	0	0	0	0	0	0	0	0	0	0	0	0	0	0	0	0	0	0	0	0	0	0	0	-0.00587941323455919	0	0	0	0	0	0	0	0	0	0	0	0	0	0	0.00778270682543389	0	-0.0029397066172796
1501	0	-0.0433275563258232	-0.216637781629116	0.0379732566823069	0	-0.12998266897747	-0.216637781629116	0.119274069690437	-0.016062898930549	0.016556058108241	-0.097363711938679	0.027264657395274	-0.227346380916149	-0.438629862901749	-0.573966831522735	-0.265319637598456	0	-0.308647193924279	-0.346620450606586	0.027264657395274	-0.173310225303293	-0.368037649180652	-0.476603119584055	0.03261895703879	-0.351974750250102	-0.259965337954939	0.03261895703879	-0.953206239168111	-0.303292894280763	-0.124135210156261	0.878246044158881	-0.72001239943075	0.314987811923179	0.238548139380873	-0.016062898930549	-0.270673937241972	-0.216637781629116	0.265812796776148	0.471741979118232	-0.655267644530865	-0.519930675909879	0.065237914077581	-0.611940088205042	-0.216637781629116	0	-0.173310225303293	0.059883614434064	0.32520325203252	0.070592213721097
1502	0	0	0	0	0	0	0	0	0	0	0	0	0	0	0	0	0	0	0	0	0	0	0	0	0	0	0	0	0	0	0	0	0	0	0	0	0	0	0	0	0	0	0	0	0	0	0	0	0
1503	0	0	0	0	0	0	0	0	-0.00608902149424587	0	0	0.00734268301637418	0	0	0	0	0	0	0	0	0	0	0	0	0	0	0	0	0	0	0	0	0	0	0	0	0	0	0	0	0	0	0	0	0	0	0	0	0
1504	0	0	0	0	0	0	0	0	0	0	0	0	0	0	0	0	0	0	0	0	0	0	0	0	0	0	0	0	0	0	0	0	0	0	0	0	0	0	0	0	0	0	0	0	0	0	0	0	0
1505	0	0	0	0	0	0	0	0	0	0	0.00372828275296398	0	0	0	0	0	0	0	0	0	0	0	0	0	0	0	0	0.00372828275296398	0	0	0	0	0	0	0	0	0	0	0	0	0	0	0	0	0	0	0	0	0
1506	0	0.0246426811237063	0	0	0	0	-0.0136948781155848	0	-0.0136948781155848	0	0.0492853622474125	0	0	0	0	0	0	0	0	0	0	0	0	0	0	0	0	0	0	0	0	0	0	0	0	0	0	0	0	0	0	0	0	0	0	0	0	0	0
1507	0	0	0	0	0	0	0	0	0	0	0	0	0	0	0	0	0	0	0	0	0	0	0	0	0	0	0	0	0	0	0	0	0	0	0	0	0	0	0	0	0	0	0	0	0	0	0	0	0
1508	0	0.02808199943836	0	0	0	0	0	0.05616399887672	0.02808199943836	0	0	0	0	-0.0135593220338983	0.000963355370563402	0.05616399887672	0	0	0	0	0	0	0	0.02808199943836	0	0	-0.0271186440677966	0	0	0	0	0	0	0	0	0	0	0	0	-0.0135593220338983	0	0	0	-0.0135593220338983	0	0	0	0	0.0426046768428217
1509	0	0.0347342827370615	0	0	0	0	0	0	0	0	0	0	0	0	0	0	0	0	0	0	0	0	0	0	0	0	0	0	0	0	0	0	0	0	0	0	0	0	-0.0148536911422488	0	0	0	0	0	0	0	0	-0.00495123038074962	0
1510	0	0	0	0	0	0	0	0	0	0	0	0	0	0	0	0	0	0	0	0	0	0	0	0	0	0	0	0	0	0	0	0	0	0	0	0	0	0	0	0	0	0	0	0	0	0	0	0	0
1511	0	0	0	0	0	0	0	0	0	0	0	0	0	0	0	0	0	0	0	0	0	-0.0101214574898785	0	0	0	0	0	0	0	0	0	0	0	0	0	0	0	0	0	0	0	0	0	0	0	0	0	0	0
1512	0	0	0	0	0	-0.0453309156844968	0	0	0	0	0	0	0	0	-0.057125603199978	0	0	0	-0.0453309156844968	0	0	0	0	0	0	0	0	0	0	0	0	0	0	0	0	0	0	-0.0453309156844968	0	0	0	0	0	0	0	0	0	0	0
1513	0	0	0	0	0.0358551452133381	0	0	0	-0.0125580811252041	0	0	0	0	0.034036047051064	0	0	0	-0.0125580811252041	0	0	0	0	0	0	0	0	0	0	0	0	0	0	0	0	0	0	0	0	0	0	0	0	0	0	0	0.0179275726066691	0	0	0
1514	0	0	0	0	0	0	0	0	0	0	0	0	0	0	0	0	0	0	0	0	0	0	0	0	0	0	0	0	-0.0200192256911664	0	0	0	0	0	0	0	0	0	0	0	0	0	0	0	0	0	0	0	0
1515	0	0	0.019116263549254	0.0130684788290643	0	-0.00860659264996988	0	0	-0.0602461485497891	0	0	-0.0643908550206646	0	0	0	-0.0172131852999398	0	0	0	0	0	0	0	0	-0.0344263705998795	-0.00860659264996988	0	0	0	0	0	0	0	0	-0.0172131852999398	0	0	-0.0172131852999398	0	0	0	0	-0.0172131852999398	0	0	0	0	0	0
1516	0	0	0	0	0	0	0	0	0	0	0	0	0	0	0	0	0	0	0	0	0	0	0	0	0	0	0	0	0	0	0	0	0	0	0	0	0	0	0	0	0	0	0	0	0	0	0	0	0
1517	0	0	0.00922764602749838	0	0	0	0	0.00922764602749838	0	0	0	0	0	0	0	0	0	0	0	0	0	0	0	0	0	0	0.00922764602749838	0	0	0	0	-0.00505996053230785	0	0	0	0	0	0	0	0.00922764602749838	0	0	0	0	0	0	0	0	0
1518	0	0	0	0	0	0	0	0	0	0	0	0	0	0	0	0	0	0	0	0	0	0	0	0	0	0	0	0	0	0	0	0	0	0	0	0	0	0	0	0	0	0	0	0	0	0	0	0	0
1519	0	-0.0223893154158754	-0.0121936349225704	0	0	-0.0121936349225704	0	0	0	-0.0243872698451408	0	0.0131926121372032	0	-0.0121936349225704	0	0	0	0	-0.0111946577079376	0	-0.0121936349225704	0	0.0131926121372032	-0.0243872698451408	0	0	0	0.000998977214632799	0	-0.0121936349225704	-0.0243872698451408	-0.0365809047677113	0	-0.0487745396902817	0	0	-0.0243872698451408	0	0	-0.0609681746128521	0	0	0	0.0131926121372032	0	0	0	0	0
1520	0	0	0	0	0	0	0	0	0	0	0	0	0	0	0	0	0	0	0	0	0	0	0	0	0	0	0	0	0	0	0	0	0	0	0	0	0	0	0	0	0	0	0	0	0	0	0	0	0
1521	0	0	0	0	0	0	0	0	0	0	0	0	0	0	0	0	0	0	0	0	0	0	0	0	0	0	0	0	0	0	0	0	0	0	0	0	0.0446030330062444	0	0	0	0	0	0	0	0	0	0	0	0
1522	0	0	0	0	0	0	0	0	0	0	0	0	0	0	0	0	0	0	0	0	0	0	0	0	0	0	0	0	0	0	0	0	0	0	0	0	0	0	0	0	0	0	0	0	0	0	0	0.00830564784053156	0.0249169435215947
1523	0	0	0	0	0	0	0	0	0	0	0	0	0	0	0	0.011906888134786	0	0	0	0	0	0	0	0	0	0	0	0	0	0	0	0	0	0	0	0	-0.00567134552672622	0	0	0	0	0	0	0	0	0	0	0	0
1524	-0.0345901072293324	0	0	0	0	0	0	0	-0.0345901072293324	0	0	0	0.0134175739996642	0	-0.0691802144586648	0	-0.0345901072293324	0	0	0.0614252552286609	0	0	0	0	0	0	0	0	0	0	0	0.0480076812289966	0	0	0	0	0.0480076812289966	0	0	0	0	0	0	0	0	0	0	0	0
1525	0	0	0	0	0	0	0	0	0.017096939647803	0	-0.00187652235735438	0.5261124665885	0.0136219422540511	-0.00694999478750391	0.390309520911217	-0.0173749869687598	-0.00347499739375195	0	0	0	0	0	0	0	0	0	0	0	0	0	0	0	0	0	0	0	0	0	0	0	0	0	0	0	0	0	0	0	0
1526	0	0	-0.00770534751117275	0	0	0	0	0	0.0189358076121947	0	-0.00770534751117275	-0.0154106950223455	0	0	0.0112304601010219	0	0	0	0	0	-0.00770534751117275	0	0	0	0	0	0	0	0	0	0.0189358076121947	0	0	0	0	0.0189358076121947	0	-0.00770534751117275	0	0	0	0	0	0	0	0	-0.00770534751117275	0	0
1527	0	0	0	0	0	0	0	0	0	0	0	0	0	0	0	0	0	0	0	0	0	0	0	0	0	0	0	0	0	0	0	0	0	0	0	-0.0361271676300578	0	0	0	0	-0.397398843930636	-0.0722543352601156	-0.108381502890173	0	0	0	0	0	0
1528	0	0	0	0.0539665407447383	0	0	0	0	0	0	0	0	0	0	0	0	0	0	0	0	0	0	0	0	0	0	0	0	0	0	0	0	0	0	0	0	0	0	0	0	0	0	0	0	0	0	0	0	0
1529	0	0	0	0	0	0	0	0	0	0	0	0	0	0	0	0	0	0	0	0	0	0	0	0	0	0	0	0	0	0	0	0	0	0	0	0	0	0	0	0	0	0	0	0	0	0	0	0	0
1530	0	0	0	0	0	0	0	0	0	0	0	0	0	0	0	0.0840571588680303	-0.017572285384293	-0.33909081825734	0.0973541335647772	-0.0284940874768486	0.0280190529560101	0	0	0	0	0	0	0	0	0	0	0	0	0	0	0	0	0	0	0	0	0	0	0	0	0	0	0	0
1531	0	0	0	0	0	0	0	0	0	0	0	0	0	0	0	0	0	0	0	0	0	0	0	0	0	0	0	0	0	0	0	0	0	0	0	0	0	0	0	0	0	0	0	0	0	0	0	0	0
1532	0	0	0	0	0	0	0	0	0	0	0	0	0	0	0	0	0	0	0	0	0	0	0	0	0	0	0	0	0	0	0	0	0	0	0	0	0	0	0.0164880461665293	0	0	0	0	0	0	0	-0.00492174426616793	0	0.0164880461665293
1533	0	0	0	0	0	0	0	0	0	0	0	0	0	0	0	0	0	0	0	0	0	0	0	0	0	0	0	0	0	0	0	0	0	0	0	0	0	-0.00718236012353659	0	0	0	0	-0.00718236012353659	0	0	0	-0.0303806248279895	0	0
1534	0	0	0	0	-0.0771604938271605	0	0	0	0	0	0	0	0	0	0	0	0	0	0.710900473933649	0	0	0	0	0	0	0	0	0	0	0	0	0	0	0	0	0	0	0	0	0	0	0	0	0	0	0	0	0	0
1535	0	0	0	0	0	0	0	0	0	0	0	0	0	0	0	0	0	0	0	0	0	0	0.0231588698471515	0	0	0	0	0	0	0	0	0	0	0	0	0	0	0	0	0	0	0	0	0	0	0	0	0	0
1536	-0.0370644922164566	0	0	0.0486952303112421	0	-0.0741289844329133	-0.0123548307388189	0	0	0	0	0	0	-0.0123548307388189	0	-0.0123548307388189	-0.0617741536940944	0	0	0	-0.0065394616914261	0	-0.0123548307388189	0	0	0	0	0	0	0	0	0	0	0	0	0	0	0	0	0	0	0	0	0	0	0	0	0	-0.0123548307388189
1537	0	0	-0.00576767793286423	0	0	0	0	0	0	0	0	0	0	0	0	0	0	0	0	0	-0.00576767793286423	0	0	0	0	0	0	0	0	0	0	0	0	0	0.00821220333415455	0	0	0	0	0	0	0	0	0	0	0	0	0	0
1538	0	-0.00157212929191297	0	-0.00314425858382593	0	0	0	0	0	0	0	0.00520670623763407	0	0	0	0	0	-0.00157212929191297	0	0	0	0	-0.0141491636272167	0	0	-0.00157212929191297	0	0	0	0	0	0.00726915389144217	0	-0.00157212929191297	0	0	-0.00314425858382593	-0.00157212929191297	0	0.00049031836189517	0	0	0	-0.00157212929191297	0	0	0	0	0
1539	0	-0.026638252530634	0	0	0	0	0	0.150037509377344	0	0	-0.053276505061268	0	0	-0.053276505061268	0	0	0	0	0	0	0.0483805021580382	0	0	0.150037509377344	0.0750187546886722	0	0	0.0483805021580382	0	-0.053276505061268	0	0	0	0	0	-0.053276505061268	0	0	0	0	0	0.300075018754689	0	0.0483805021580382	0	0	0	0.12339925684671	0
1540	0	0	0	0	0	0	0	0	0	0	0	0	0	0	0	0	0	0	0	0	0	0	0	0	0	0	0	0	0	0	0	0	0	0	0	0	0	0	0	0	0	0	0	0	0	0	0	0	0
1541	0	0	0	0	0	0	0	0	0	0	0	0	0	0	0	0	0.0237135404315864	0	0.153660907708979	0	0.110027048552293	0.743613168856468	1.04695281005454	0.0113796651194605	0.128993157084728	0.082496667350045	-0.0199203187250996	0	0	0	0.0275067621380733	0.0237135404315864	6.74495284217646	0.0512203025696597	-0.0398406374501992	0.0237135404315864	-0.0199203187250996	0	0	0	0	0.0237135404315864	0.0787270647077328	0.0037932217064868	0	0	0.0237135404315864	0	0
1542	0	0	0	0	0	0.0078610172156277	0	0	0	0	0	0	-0.00997904400758407	0	0	0	0	-0.0220761148071245	0	0	0	0	-0.0299371320227522	0	0	0	0	0	0	0	0	0	0	-0.0199580880151681	0	0	0	0	0	0	0	0.013604007639299	0	-0.0199580880151681	0	0	0	0	0
1543	0	0	0	0	0	0	0	0	0	0	0	0	0	0	0	0	0	0	0	0	0	0	0	0	0	0	0	0	0	0	0	0	0	0	0	0	0	0	0	0	0	0	0	0	0	0	0	0	0
1544	0	0	0	0	0	0	0	0	0	0	0	0	0	0	0	0	0	0	0	0	0	0	-0.00555524693072607	0	0	0	0	0	0	0	0	0	0	0	0	0	0	0	0.00768639508070715	0	0	0	0	0	0	0	0	0	-0.00555524693072607
1545	0	0	0	0	0	0	0.106968215158924	0	0	0	0.0033926875928243	0	0	0	-0.0118884860013077	0	0	0	0.00933693059347813	0	0	0	-0.0118884860013077	0	0	0	0	0	0.168934041720447	0	0	-0.00594424300065387	0	0	0	0	0	0	0	0	0	0	0	0	0	0.015281173594132	0	0	0
1546	0	0	0	0	0	0	0	0	0	0	0	0	0	0	0	0	0	0	0	0	0	0	0	0	0	0	0	0	0	0	0	0	0	0	0	0	0	0	0	0	0	0	0	0	0	0	0	0	0
1547	0	0	0	0	0	0	0	0	0	0	0	0	0	0	0	0	0	0	0	0	0	0	0	0	0	0	0	0	0	0	0	0	0	0	0	0	0	0	0	0	0	0	0	0	0	0.0357302367128182	0	0	0
1548	0	0	0	0.00641025641025641	0	0	0	0	0	0	0	0	0	0	0	0	0	0	0	0	0	0	0	0	0	0	0	0	0	-0.00436338249410943	0	0	0	0	0	-0.00872676498821887	0	0	0	0	0	0	0	0	0	0	0	0	0
1549	0	0.0111520017843203	0	0	0	0.00728562380720926	0	0.00557600089216014	0	0	0	0	0	0	0	0.00557600089216014	0	0	0	0	0	0.00557600089216014	0	0	0.00557600089216014	0	0	0.00557600089216014	0	0	0	0	0	0	0	0	0	0.0111520017843203	0	0	0	-0.00773275595422209	0	0	0	0	-0.00386637797711104	0	0
1550	0	0	0	0	0	0	0.0481927710843374	0	0	-0.0473260766682442	0	0	0	0	0	0	0	0	-0.0937854589203956	0	0	0	0	-0.0473260766682442	0	0.0481927710843374	0	0	0	0	0	0	0	-0.0473260766682442	0	0	-0.0473260766682442	0	0	0	0	0	0	0	-0.0473260766682442	0	0	0	0
1551	0	0	0	0	0	0	0	0	0	0	0	0	0	0	0	0	0	0	0	0	0	0	0	0	0	0	0	0	0	0	0	0	0	0	0	0	0	0	0	0	0	0	0	0	0	0	0	0	0
1552	0	0	0	-0.0213310580204778	0	0	0	0	0	0.0384024577572965	-0.0426621160409556	0	0	0	0	0	0	0	0	0.0384024577572965	0	0	0	0	0	0	0	0	0	0	0	0	0	0	0	0	0	0	0	-0.0213310580204778	0	-0.0213310580204778	0	0	0	0	0	0	-0.0213310580204778
1553	0	0	0	0	0	0	0	0	0	0	0	0	0	0	0	0	0	0	0	0	0	0	0	0	0	0	0	0	0	0	0	0	0	0	0	0	0	0	0	0	0	0	0	0	0	0	0	0	0
1554	0	0	0	0	0	0	0	0	0	0	0	0	0	0	0.00588978252166107	0	0	0	0	0	0	0.0204394481349004	-0.00865988309157826	0	0	0	0	0.0161095065891113	0	0	0	0	0	0	0	0	0	0	0	0	0	0	0	0	0	0	0	0	0
1555	0	0	0	0	0	0	0	0	0	0	0	0	0	0	0	0	0	0	0	0	0	0	0	0	0	0	0	0	0	0	0	0	0	0	0	0	0	0	0	0	0	0.0174581005586592	0	0	0	0	0	0	0
1556	0	0	-0.0292654375182909	0	0	-0.0292654375182909	0	0	0	0	-0.0292654375182909	0	0	0	0	0.0727027207639432	0	-0.0221795146546102	0	0	-0.117061750073164	0	0	0	0	0	0	0.0656167979002625	0	0	0.101968158282234	0	-0.0292654375182909	0	0	-0.0877963125548727	0	0	0	-0.146327187591454	-0.0877963125548727	0	0	0	0	0	0	0	0
1557	0	0	0	0	0	0	0	0	0	0	-0.00416927246195539	0	0	0	0	0	-0.00416927246195539	0	0	0	0	0	0	0	0	0	0	0	0	0	0	0	0	0	0	0	0	0	0	0	0	0	-0.00416927246195539	0	0	0	0	0	0
1558	0	0	0.0051488299330048	0	0	0	0	0	0	0	0.021944261575598	0	0	0	-0.0167954316425932	0	0	0	0	0	0	0	0	0	0	0	0	0	0	0	0	0	0	0	0	0	0	0	0	0	0	0	0	0	0	0	0	0	0
1559	0	-0.0424268137462877	0	0	0.127632418634333	0	0	0	0	0	0.0638162093171666	0	0	0.0638162093171666	-0.0424268137462877	0	0.0213893955708789	0	0	0	0	0	0	0	0	0	0	0	0	0	0	0	-0.0212134068731438	0	0	0	0	0.127632418634333	0	0	0	0	0	0	0	0	0	0	0
1560	0	0	0	0.0879915045090746	0	0	0	0.00428075133093604	0	0	0	0	0	0	0	0	-0.00311788731955227	0.0443918319029299	0	0	0	0	0.00739863865048831	0	0	0	0	0.00428075133093604	0	0	0	0	0	0.00739863865048831	0	0	0.0159601413123604	0	0.191150991033725	0	0	0	0.00428075133093604	0	0	0	0	0	0.0214037566546801
1561	0	0	0	0	0	0	0	0	0	0	0	0	-0.000556783572657472	0.00172690693698517	0	0	0	0	0	0	0	0	0	0	0	0	0	0	0	0	0	0	0	0	0	0	0	0	0	0	0	0	0	0	0	0	0	0	0
1562	0	0	0	0	0	0.327510917030568	0	0	0	0	0	0	0	-0.420246983143165	0	-0.293255131964809	0	0	0	-0.55225447886386	0	0	0	0.102767355197275	0	0	0	0	0	0	0	0.0114185950219195	0	0	0.109170305676856	0	0	0	0	0	0	0	0	0	0	0	0	0	0
1563	0	0	0	-0.0768836494105587	0	0	0	0	-0.0256278831368529	-0.0512557662737058	0	0	-0.0256278831368529	-0.0512557662737058	0	0	-0.102511532547412	0.0265181649429859	0	-0.0768836494105587	-0.0256278831368529	0	0	-0.0768836494105587	-0.0256278831368529	0	0	0	0.0265181649429859	0	0	0	-0.0256278831368529	-0.128139415684264	-0.0256278831368529	0	-0.0512557662737058	0	0.000890281806133	-0.0768836494105587	0	0	0	0.0265181649429859	0	-0.0512557662737058	0	0.0265181649429859	0
1564	0.0259201658890617	-0.0038551179971205	0	0	0	0	0.0129600829445308	0	0	-0.00840760047082563	0	0.0129600829445308	0	0	0	0	0	0	0	0.0304726483627669	0	0	0.0388802488335925	0	0.0091049649474104	0.0129600829445308	0	0	0	0	0	0	0	-0.0168152009416513	0	0	-0.00840760047082563	0	0	0	0	0.0388802488335925	0	0	0	0	-0.00840760047082563	0.0259201658890617	0.0129600829445308
1565	0.00630915030523874	0	0.0112309989800585	-0.00769645193565766	0	-0.0559561159952321	0	-0.023089355806973	0	0	-0.0153929038713153	0	0.020314752546135	0	-0.0013873016304189	0	-0.0237830066221824	0	0	0	0	0	0	-0.023089355806973	-0.000693650815209479	-0.0153929038713153	0	-0.0174738563169438	0	0	0.0140056022408964	-0.33811354142211	-0.0153929038713153	-0.337057704633458	-0.00769645193565766	0	0	-0.000693650815209479	0	-0.0398695613087072	0	0	-0.0153929038713153	-0.046178711613946	-0.069268067420919	0	0	-0.00769645193565766	-0.023089355806973
1566	0	0	0	0	0	0	0	0	0	0	0	0	0	0	0	0.00858516483516484	0	-0.00987947046038332	0	0	0	0	0	0	0	0	0	0	0	0	0	0	0	0	0	0	0	0	0	0	0	0	0	0	0	0	0	0	0
1567	0	0	0.0462677359654534	0.025764322165063	0	-0.0025404175726197	0	0	0.0154225786551511	0	0.0039006629686461	0	0	0	0	0	0	-0.0089814981138854	0	0	0	0.0154225786551511	0.0308451573103023	0	0	0	0.0308451573103023	0	-0.0089814981138854	-0.0025404175726197	-0.0089814981138854	0.0154225786551511	0.037286237851568	0	0	0	0	0	0.0308451573103023	0	0	-0.0089814981138854	0	0	0	-0.0089814981138854	0	-0.0089814981138854	0
1568	0	0	0	0.0212179079142797	0	0	0	0	-0.0133333333333333	0	0	0	0	0	0	0.063653723742839	0	0	0	-0.0266666666666667	0	-0.0133333333333333	0	0.0424358158285593	0.474805856142584	-0.0133333333333333	0	0	0	0.0369870570761723	0	0	0.0212179079142797	0	0	0	0	-0.0321154254190536	0	-0.0666666666666667	0	0	-0.045448758752387	-0.0133333333333333	0	-0.0296796095904943	-0.0266666666666667	0	-0.0133333333333333
1569	0	0	-0.293677643626431	-0.0223914017017465	0	-0.0223914017017465	-0.0447828034034931	-0.136937831714206	0	0	0	-0.0947444498144394	0.0714396562808994	-0.134348410210479	-0.501292493781397	-0.326426731343085	0	0	0.0198019801980198	0	0	0	-0.112870400340527	0	0.0198019801980198	0	0	0	-0.0223914017017465	0	0	-0.0447828034034931	0	0	0.0198019801980198	0	0	0	-0.0895656068069861	0	0	0	0	0	0	0	0	0	-0.0671742051052396
1570	-0.0760456273764259	0	0	0	-0.0760456273764259	0	0.315457413249211	0	0	0	-0.152091254752852	0	0.157728706624606	0	-0.0760456273764259	0	0.315457413249211	-0.070408175504672	0	0	-0.152091254752852	0.157728706624606	0	0.157728706624606	0	0	0	0.157728706624606	0.315457413249211	0	-0.0760456273764259	0	-0.152091254752852	0.157728706624606	0	0	0	0	0	0	0	0	0	0	0	0	0	0	0
1571	0	0	0	0	0	0	0	0	0	0	0	0	0	-0.0012605412764241	0	0	-0.0012605412764241	0	0	0	-0.00967185068718684	-0.0012605412764241	0	0	0	0	0	0	0	0	0	0	0	0	0	0	0	0	0	0	0	0	0	0	0	0	0	0	0
1572	0	-0.14695077149155	0	0	0	0	0	0	0	-0.0734753857457752	0	0	0	-0.382132408426501	-0.396887888124125	-0.76547286782239	-0.191217210584425	-0.161706251189176	0	0	0	0	0	0.176159718144451	0	-0.132799317278624	-0.0734753857457752	-1.05967642354785	0.0439644263505258	0	0.234879624192601	-0.0734753857457752	0.293599530240752	0.234879624192601	0.0587199060481503	-0.0734753857457752	0	0.117439812096301	0.0587199060481503	0	-0.0734753857457752	0	-0.0734753857457752	0	0	-0.0147554796976249	-0.514327700220426	0.117439812096301	0
1573	0	0	0	0	0	0	0	0	0	0	0	0	0	0	0	0	0	0	0	0	0	0	0	0	0	0	0	0	0	0	0	0	0	0	0	0	0	0	0	0	0	0	0	0	0	0	0	0	0
1574	0	0	0	0	0	0	0	0	-0.0160926939169617	0	0	0	0	0	0	-0.0160926939169617	0	0	0	0	0	0	0	0.0262372022342363	0	0	0	0	0	0	0	0	0	0	0	-0.0965561635017702	0	0	0	0	-0.0321853878339234	0	0	0	0.0101445083172746	0	-0.0321853878339234	0	-0.0703189612675343
1575	0	0	0	-0.0263782643102084	0	-0.0263782643102084	0	0	0	0	0	0	0	0	0	0	0	0	0	0	0	0.0413052457662123	0	0	0	0	0	0	0	0	0	0	0	0	0	0	0	0	0	0	0	0	0	0	0	0	0	0	0
1576	0	0	0	0	0	0	0	0	0	0	0	0	0	0	0	0	0	0	0	0	0	0	0	0	0	0	0	0	0	0	0	0	0	0	0	0	0	0	0	0	0	0	-0.0754432289701999	0	0	0	0	0	0
1577	0	0	0	0	0	0	0	0	0	0	0	0	0	0	0	0	0	0	0	0	0	0	0	0	0	0	0	0	0.614404765676986	0	0	0	0	0.0467604894234382	0	0	0	-0.0478468899521531	0	0	0	0	0	0.0946073793755913	0	0	0	0	0
1578	0	0	0	0	0	0	0	0	0	0	0	0	0	0	0	0	0	0	0	0	0	0	0	0	0	0	0	0	0	0	0	0	0	0	0	0	0	0	0	0	0	-0.00612932883849219	-0.00306466441924609	0	0	0	0	0	0
1579	0	0	0	0	0	0	0	0	0	0	0	0	0	0	0	-0.0564174894217207	0	0.0172871606576564	0	0.171062037420863	-0.0282087447108604	0	0	0	-0.0564174894217207	0.0909918107370337	0	0	0.0454959053685168	0	0	-0.0564174894217207	0	0	0	0	0	0	0	0	0	0.244766687500241	0	0	0	0	0	-0.0109215840532039	0
1580	0	0	0	0	0.0334112930170398	0	0	0	0.167056465085199	0	0	0	0	0	0	0.133645172068159	0	0.108118040117217	0.0334112930170398	0	0	0	0	0	0	0	0	0.0334112930170398	0	0	0	0	0	0	0	0	0	0	0	0.0334112930170398	0	0	0	0	0	0	0	0	0.0334112930170398
1581	0	0	0	0	0	0	0	0	0	0	0	0	0	0	0	0	0	0	0	0	0	0	0	0	0	0	0	0	0	0	0	0	0	0	0	0	0	0	0	0	0	0	0	0	0	0	0	0	0
1582	0	0	0	0	0	0.0570450656018254	0	0	0	0	0	0	0	0	0	0	0.0162163550997067	0	0	0	0	0	0	0	0	0	0	0	0.0285225328009127	0	0	0	0	0	0	0	0	0	0	0	0	0	0	0	0	0	0	0	0
1583	0	0	0.0609384521633151	0.0258615418686367	0.0609384521633151	-0.0480076812289966	0.0258615418686367	0	0	0	-0.0960153624579933	-0.0480076812289966	0	0.0609384521633151	0	0.0609384521633151	0	0	-0.0960153624579933	0.0609384521633151	0	-0.0480076812289966	0	0.09973076496627	0.0738692230976334	0.0609384521633151	-0.0480076812289966	0.00371540250827698	0	0.0129307709343185	-0.057223049655038	0.12187690432663	-0.236323003636706	0.0738692230976334	-0.384061449831973	0.0129307709343185	0	0	0.0609384521633151	0	0	0	0	0	0	0	0	-0.0960153624579933	-0.0480076812289966
1584	-0.0792393026941363	0	0	0	0	0	0	0	0	0	0	0.151745068285281	0	0	0	-0.475435816164818	0	0	0	0.0725057655911447	0	0	0	0	0	0	-0.0792393026941363	0	0	0	-0.158478605388273	-0.0792393026941363	0.738524730117432	-0.0792393026941363	0	0.0725057655911447	0	-0.0792393026941363	0	0	0	-0.0792393026941363	0.151745068285281	0	0	0	0	0	0
1585	0	0	0	0	-0.0143256213738271	0	0	0	0	0	0	0	0	0	0	0	0	0	0	0	0	0	0	0	0	0	0	0	0	0	0	0	0	0	0	0	0	0	0	0	0	0	0	0	0	0	0	0	0
1586	0	0	0	0	0	0	0	0	0	0	0	0	0	0	0.0950570342205323	0	0	0	-0.0448833034111311	0	0	0	0	0	-0.0448833034111311	0	0	0	0	0	0	0	0	-0.0448833034111311	0	0.0501737308094012	0	0	0	0	0	0	0	0	0	0	0	0	0
1587	0	0	0	0	0	0	0.232960452978215	0	0	0	0	0	0	0	0	0	0	0	0	0	0	0	0	0	0	0	0	0	0.048674730713037	0	-0.172117039586919	0	0	0	-0.057372346528973	0	0	0	0	0	0	-0.057372346528973	0	0	-0.172117039586919	0	0	0	0
1588	0	0	0	0	0	0	0	0	0	0	0	0	0	0	0	0	0	0	0	0	0	0	0	0	0	0	0	0	0	0	0	0	0	0	0	0	0	0	0	0	0	0	0	0	0	0	-0.05941770647653	0	0
1589	0	0	-0.00417553968850474	0	0	0	0	0	0.00642756138321121	0	0	0	0	0	0	0	0	0	0	0.00642756138321121	0	0	0	0	0	0	0	0	0	0	0	0	0	0	0	0	0	0	0	0	0	0	0	0	0.00642756138321121	0	0	0	0
1590	0	0	0	0	0	0	0	0	0	0	0	0	0	0	0	0	0	0	0	0	0	0	0	0	0	0	0	0	0	0	0	0	0	0	0	0	0	0	0	0	0	0	0	0	0	0	0	0	0
1591	0.0022607037156736	0	0	0	0	0	-0.191204588910134	0	0	-0.152963671128107	0.0138773244518457	0	0	0	0	0	-0.0382409177820268	0	-0.220402691829467	0	0	0	0	0	0	0	0	-0.0127469725940089	0	-0.0382409177820268	0	0	0	0	-0.0127469725940089	0	0	0	0	0	0	0	-0.0127469725940089	0	0	0	0	0	0
1592	0	-0.0356379187455453	0	0.102145045965271	0	0.102145045965271	0	0	0	0.0680966973101805	0	0	0	0	0	0	0	0	0.0308692084741805	0	0	0.136193394620361	0.0340483486550902	0	0	0.102145045965271	0	0.0340483486550902	0	0	0	0	0.102145045965271	0.204290091930541	0.0340483486550902	0	0	0	0	0	0	-0.0712758374910905	0	0	-0.0356379187455453	0	0	0	0
1593	0	0	0	0	0	0	0	0	0	0	0	0	0	0	0	0	0	0	0	0	0	0	0	0	0	0	0	0	0	0	0	0	0	0	0	0	0	0	0	0	0	0	0	0	0	0	0	0	0
1594	0	0	0	0	0.0716332378223496	0	0	0	0	0	0	0	0	0	0	0	0	0	0	0.0358166189111748	0	0	0	0	0	0	0	0	0	0	0	0	0	0	0	0	0	0	0	0	0	0	0	0	0	0	0	0	0
1595	0	0	0	0	-0.0331895121141719	0	0	0	0	0	0	0	-0.016594756057086	0	0	0	0	0	0	0	0	0	0.0780126233185053	0	0	0	-0.016594756057086	0	0	0	0	0	0	0	0	0	0	0	0	0	0.0946073793755913	0	0	0	0	0	0	0	0
1596	0	0	0	0.679827841730664	-0.0149476831091181	0	0.07097232079489	0	0	0.177430801987225	0	0	0	0	0	0.106458481192335	0	0.21291696238467	0	0	0	0	0	0.035486160397445	0	0	0	0	0	0.035486160397445	0	0	0	0	0	0	0	0	0	0	0	0	0	0	0	0	0	0	0
1597	0	0	0	0.0801420336195122	0	-0.0289687137891078	0	0	0	0	0	0	0	0	0	0	0	0	0	0	0	0	0	0	0	0	0	0	0	0	0	0	0	0	0	0	0	0	0	0	0	0	0	0	0	0	0	0	0
1598	0	0	0	0	0	0	0	0	0	0	0	0	0	0	-0.0430663221360896	0	0	0	0	0	0	0	0	0	0	0	0	0	0	0	0	0	0	0	0	0	0	0	0	0	0	0	0	0	0	0	0	0	0
1599	0	0	0	0	0	0	0	0	0	0	0	0	0	0	0	0	0	0	0	0	0	0	0	0	0	0	0	0	0	0	0	0	0	0	0	0	0	0	0	0	0	0	0	0	0	0	0	0	0
1600	0	0	0	0	0	0	0	0	0	0	0	0	0	0	0	0	0	0	0	0	0	0	0	0	0	0	0	0	0	0	0	0	0	0	0	0	0	0	0	0	0	0	0	0	0	0	0	0	0
1601	0	0	0	0	0	0	0	0	-0.128949065119278	0	0	0	0	0	0	0	0	0	0	0	0	0	0	0.043859649122807	0	0	0	0	0	0	0	0	0	0	0	0	0	0.043859649122807	0	0	0	-0.0644745325596389	0	0	0	0	0	0	0
1602	0	0	0	0	0	0.026160889470242	0.013080444735121	0	0	0	-0.0311259824138199	0	0	0	0	0	0	0	0	0.013080444735121	0	0	0	0	0	0	0.002816402659877	0	0	0	0.111611787953074	0	0	-0.00429738056740199	0.00529894913166602	0	0	-0.23344486810365	-0.01556299120691	0.013080444735121	0	0	0	0	0	0	0	-0.260752879293328	0
1603	-0.0159863583075775	-0.0398626974465355	0.101453332592807	0.0053975849841313	-0.0426302888202068	0.048096672685943	0.205399061032864	0.0267127293942346	0.146713615023474	-0.0186163519180378	-0.111904508153043	0.0321103143783655	-0.0746030054353618	0.0187539496812485	-0.159863583075775	6.87988816054017e-05	0.0453978801938777	0.122768477002911	0.045466679075483	0.160069979720592	0.0293427230046948	0.0560554523989294	0.0107263710866571	-0.0292739241230895	-0.149206010870724	0.317578764712329	-0.0878905712508742	-0.028998728596667	0.192249092980563	0.018822748562854	0.152179998889211	0.122974873647727	-0.021039948883682	0.043043082109839	0.275086073655332	0.440140845070423	0.347471878769866	0.176331533554591	0.106850917576939	0.074809402080178	0.312318777491407	-0.01038237667863	0.040413088499379	-0.199795079403916	0.000206396644816004	0.096193345371887	0.053494257670075	-0.0505202696515875	0.114809697289925
1604	0	0	0	0.002677376171352	0	0	0	0	0	0	0	0	0	0	0	0	0	0	0	0.0133868808567604	0	0	0.0133868808567604	0	0	0	0	0	0	0	0	0	0	0	0	0	0	0	0	0	0	0.0133868808567604	0	0	0	0	0	0	0
1605	0	0	0	-0.0352609308885755	0	0	0	0	0	0	0	0	0	0	0	0	0	-0.0352609308885755	0	0	0	0	-0.0352609308885755	0	0	0	0	0	0	0	0.0837520938023451	0	0	0	0	0	0	0	0	0	0	0	0	0	0	0	0	0	0
1606	0.0079818474017569	0	0	0	0	0	-0.0114364135407136	-0.0228728270814273	0	0.0308546744831842	0	0	0.0925640234495526	-0.0114364135407136	0	-0.0228728270814273	0	0	0	0	0	0	0.0617093489663684	-0.0228728270814273	0	-0.0114364135407136	0	0	0	0.0308546744831842	0	0	0	0	0	0	0	-0.0228728270814273	-0.0457456541628545	0	0	0.0502729354256548	0	-0.0114364135407136	0	0	0	0	0
1607	0	0	-0.0435729847494553	0	0	0.185758513931889	0	0	0	0	0	0	0	0	0	0	0.0366930397890153	0	0	0	0	0	0	0	0	0	0	0	0	0	0	0	0	0	0	0.0619195046439628	0	0	0	0	-0.0871459694989107	0	0	0	0	0	0	0	0
1608	0	-0.00432021428262842	0	0	0	0	0	0	0	0	0	0	0	-0.00864042856525684	0	0	0	0	0	0	0	0	0	0	0	0	0	0	0	0	0	0	0	0	0	0	0	0	0	0	0	0	0	0	0	0	0	0	0
1609	0	0.00453309156844968	-0.00547016027569608	0	0	0	-0.0109403205513922	0	0.00453309156844968	-0.0109403205513922	0	0	0	0	-0.00547016027569608	0	0	0	-0.00547016027569608	0.00453309156844968	-0.00547016027569608	0	0.00453309156844968	-0.0164104808270882	0.00906618313689937	0	-0.00547016027569608	0	-0.0109403205513922	-0.0009370687072464	0	-0.00734429769018883	-0.00547016027569608	0	-0.0337580303614228	0	0	-0.0109403205513922	0.00906618313689937	0	-0.00734429769018883	-0.0192216869488275	-0.0601717630326569	-0.0346950990686692	-0.00547016027569608	-0.0164104808270882	0.00453309156844968	-0.0109403205513922	-0.00547016027569608
1610	0	0	0	0	-0.0190985485103132	0	-0.00636618283677107	-0.0254647313470843	0	0	0	0	0	0	-0.0572956455309396	0	0	0.0123817117281169	0	0	0	0	0	0	-0.00636618283677107	-0.0127323656735421	0	0.0185725675921754	-0.0127323656735421	0	0	0	0	0	-0.0190985485103132	0	0	0	0	0	0	-0.00636618283677107	0	0	0	0	-0.0127323656735421	0	0
1611	0	0	0	0	-0.0273560388455752	0	0	0	0	0	0	0	-0.0316118698244933	0	0	0	0	0	0	0	0	-0.0820681165367255	0	0	0	-0.0136780194227876	0	0	0	0	0	0	0	0	0	0	0	-0.0410340582683627	0	0	0	0	0	0	0	0	0	-0.0410340582683627	0
1612	0	0	0	0	0	0	0	0	0	0	0	0	0	0	0	0	0	0	0	0	0	0	0	0	0	0	0	0	0	0	0	0	0	0	0	0	0	0	0	0	0	0	0	0	0	0	0	0	0
1613	-0.219168594383973	-2.19882931893358	-0.0692905054488833	-0.0871136106944595	-0.01933114247052	-0.06765899864682	-0.117618361625183	-0.507627694216829	-0.006526027208253	-0.01933114247052	1.17378411314932	0.049095075938527	-0.00828100358743569	-0.0692905054488833	-1.54979867392432	-0.136949504095703	-0.335278918784212	-0.108199729544162	0.57569204581495	-0.0469432885284757	-0.07732456988208	-0.0468198189513562	-0.47331324677448	0.032136257732787	-0.08699014111734	-0.019701551201878	-0.111709682302528	-0.197068316617804	-0.0274886764808362	0.081381205547943	-0.0692905054488833	-0.0242256628767097	0.0384153457868011	-0.117741831202303	-0.05799342741156	-0.146738544908083	-0.0340147036890892	-0.20787151634665	-0.229054702473962	-0.021333058003942	-0.155760365958235	-0.109584297191987	0.185180292994394	-0.10155023275879	-0.114478817598176	-0.133413149037828	-0.0694139750260027	-0.15702146402894	0.0401703221659838
1614	0	0.023872045834328	0.047744091668656	0.023872045834328	0	0.0381609579839411	0	0.047744091668656	0	0	0	0	0	0	0	0	0	0	0.047744091668656	0	-0.0479156684235745	0	0	0	0.023872045834328	0	0	0	0	0	0	0	0	0	0	0	0	0	0	0	0.071616137502984	0	0	0	0.047744091668656	0	0	0	0
1615	0	0	0	0	-0.0141843971631206	0	0.0390166504176942	-0.0141843971631206	0	0.0336927223719677	0	0	0	0	0.0336927223719677	0	0	0	0	0	0	0	0	0	0	0	0	-0.0141843971631206	0.0673854447439353	0	0	-0.448576781174131	0	0	0	0	0	0	0	0	0	0	0	0	0.0336927223719677	0	0	0	0
1616	0	0	0	0	0	0	0	0	0	0.00647458724506313	0	0	0	0	0	0	0	0	0	-3.45581041525204e-05	0	0	0	0	0	0	0	0	0	0	0	0	0	0	0	0	0	0.0129491744901263	0	0	0	0	0	0	-0.0195274360476469	0	0	0	0
1617	0	0	0	-0.00120248674258366	0	0	0	0.00493133121286091	0	0	0	0	0	0	0	0	-0.00240497348516733	-0.00120248674258366	0	0	0	-0.00240497348516733	0	0	0	0	0	0	0	0	0.00246566560643046	-0.00120248674258366	0	0	0	0	0	0	0	0	0	0.00739699681929137	0	-0.00240497348516733	0	0	0	0	0
1618	0	0	0	0	0	0	0	0	0	0	0	0	0	0	-0.00698015309802462	0	0	0	0	0	0	0	0	0	0	0	0	0	0	0	0	0	0	0	0	0	0	0	0	0	0	0	0	0	0	0	0	0	0
1619	0.00954672074891851	0.614124872057318	0.204708290685773	0.307062436028659	1.6472130462351	0.372559589823481	0.111900866091806	0.465367014417448	-0.232018561484919	0.0559504330459022	-0.139211136890951	0.0559504330459022	0.307062436028659	0.0559504330459022	0.511770726714432	0.307062436028659	0.102354145342886	0	0	0	0.633218313555156	0.0559504330459022	-0.0928074245939675	0.204708290685773	0.521317447463351	0.409416581371546	0	-0.0464037122969838	0.307062436028659	0.418963302120465	-0.185614849187935	0.102354145342886	0.158304578388789	0.409416581371546	-0.036856991548065	-0.0928074245939675	0.307062436028659	0.102354145342886	0	0	0.102354145342886	-0.0464037122969838	0.102354145342886	-0.185614849187935	0	0	0	0	0
1620	0	0	0	0	0	0	0	0	0	0	0	0	0	0	-0.00248712910687194	0	0	0	0.00501034669891465	0	0	0	0	0	0	0	0.0074794315632012	0	0	0	0	0	0	0	0	0	-0.00248712910687194	0	0	0	0	0	0	0	0	0	0	0	0
1621	0	0	0	0	0	0	0	0	0	0	0	0	0.0375093773443361	0	0	0	0	0	0.112528132033008	0	0	0	0	0	0	0	0	0.018754688672168	0	0	0	0.0937734433608402	0	0	0	0	0	0	0	0	0	-0.0138007176373171	0.0750187546886722	0	0	0	0	0	0
1622	0	0	0	0	0	0	0	0	0	0	0	0	0	0	0	0	0	0	0	0	0	0	0	0	0	0	0	0	0	0	0	0	0	0	0	0	0	0	0	0	0	0	0	0	0	0	0	0	0
1623	0	0	0	0	0	0	0	0	0.00519642485969653	0	0	0	0	0	0	0	0	0	0	0	0	0	0	0	0	0	0	0	0	0	0	0	-0.00668292845925084	0	0	0	0	0	0	0	0	0	0	0	0	0	0	0	0
1624	0	0	0	0	0	0	0	0	0	0	0	0	0	0	0	0	0	0	0	0	0	0	0	0	0	0	0	0	0	0	0	0	0	0	0	0	0	0	0	0	0	0	0	0	0	0	0	0	0
1625	0	0	0	0	0	0	0	0	0	0	0	0	0	0	0	0	0	0	0	0	0	0	0	0	0	0	0	0	0	0	0	0	0	0	0	0	0	0	0	0	0	0	0	0	0	0	0	0	0
1626	0	0	0	0	0	0	0	0	0	0	0	0	0	0	0	0	0	0	0	0	0	0	0	0	0	0	0	0	0	0	0	0	0	0	0	0	0	0	0	0	0	0	0	0	0	0	0	0	0
1627	0	0	0	0	0	0	0.01486549818941	0	0.002255157710217	0	0	0	0	0	0	0	0	0	0	0	0	0	0	0	0	0	0	0	0	0	0	0	0	0	0	-0.0103551827689759	0	0	0.0378310214375788	0	0	0	-0.0207103655379517	-0.0103551827689759	0	0	0	0	0
1628	0	0	0	0	0	0	0	0	0	0	0	0	0	0	0	0	0	0	0	0	0	0	-0.0420875420875421	0	0.0635324015247776	0	0	0	0	0	0	0	0.0635324015247776	0	0	0	0	0	0	0	0	0	0	0	0	0	0	0	0
1629	0	0	0	0	0	0	0	0	0	0	0	0	0	0.0187064621190253	0	0	0	0	0	0.0253389078930698	0.0633472697326745	0.0696224529457866	0	0.00627518321311205	0	0.0188255496393361	0	-0.0127885414668457	0.0126694539465349	-0.00639427073342285	0	0	0	0	-0.00639427073342285	0	0.0188255496393361	0	0.0633472697326745	0	0	0	0.0126694539465349	0	-0.0066324457740445	0	0	0.00627518321311205	0
1630	0	-0.019657951641439	0	-0.019657951641439	-0.387984603044839	-0.0589738549243169	-0.019657951641439	0	0	-0.117947709848634	-1.08118734027914	-0.019657951641439	-0.0827664688553759	0	-0.0393159032828779	-0.019657951641439	0	0	0	-0.019657951641439	0	-0.019657951641439	0	-0.096210223218554	-0.019657951641439	0	-0.137605661490073	0	-0.0786318065657558	0	0	0	0	0	0.0496647628507574	0	-0.019657951641439	0	0	0	0	-0.0393159032828779	-0.0589738549243169	0	-0.019657951641439	0	0	0	0
1631	-0.0279329608938547	0	0	0	0	0	0	0.045045045045045	0	-0.111731843575419	0	0	0.0171120841511903	0	0.045045045045045	-0.0558659217877095	0	-0.0558659217877095	0	0	0.045045045045045	0	0.045045045045045	-0.0279329608938547	0	0	0	0	0.0171120841511903	0	0	0	0	0	-0.0279329608938547	0	0	0.0900900900900901	-0.0558659217877095	0	0	0.0342241683023806	0	-0.0558659217877095	0	0	0	-0.0837988826815642	0
1632	0	0	0	-0.208647436640876	-0.0141242937853107	0	0	0.0510435133179803	0.0325839035516455	-0.0847457627118644	0	0	-0.0380375653749082	-0.0564971751412429	0	0	0	-0.348772028651745	-0.463685515626471	-0.030485279255099	0.004335315981024	0	-0.0847457627118644	-0.127118644067797	-0.14669659967637	-0.0564971751412429	-0.112994350282486	-0.0988700564971751	0	0	0	-0.0282485875706215	-0.433517791363609	1.8680931789188	0.149775502427224	-0.0706214689265537	0	0.0325839035516455	-0.0141242937853107	-0.251020317996808	-0.108659034301461	-0.081528792573079	0.0510435133179803	-2.7819197994157	-0.0239132715895974	0	0.069503123084315	9.6649518697085	0.386533459250791
1633	0	0	0	0	0	0	0	0	0	0	0	0	0	0	0	0	0	0	0	0	0	0	0	0	0	0	0	0	0	0	0	0	0	0	0	0	0	0	0	0	0	0	0	0	0	0	0	0	0
1634	0	0	0	0	0	0	0	0	0	0	0	0	0	0	0	0	0	0	0	0	0	0	0	0	0	0	0	0	0	0	0	0	0	0	0	0	0	0	0	0	0	0	0	0	0	0	0	0	0
1635	0	0	0	0	-0.0205044084478163	0	0	0	0	0	0	0	-0.0410088168956326	0	0	0	0	0	0	0	0	0	0	0	0	0	0	0	0	0	0	0	0	0	0	0	0	0	0	0	0	0	0	0	0	0	0	0	0
1636	0.01171378940071	-0.00710376989152903	-0.0140598710151773	-0.0210159721388255	0.00190307531082471	0.0128129958240032	-0.00600456346823586	-0.0432788194688251	-0.00600456346823586	0.00680843235576731	-0.0031499505019987	-0.00600456346823586	0.00395381938953029	0	0.0167668152135335	0.00285461296623711	-0.00205074407870557	-0.00300228173411793	0.0147160711348279	0	0.0147160711348279	-0.00300228173411793	-0.00205074407870557	0.00885917643447297	0	-0.0061522322361167	0.0281852670784818	0.0118614581685909	-0.00109920642329322	0	-0.00600456346823586	0.0237229163371817	-0.00109920642329322	0	0	0.00095153765541236	0	0	-0.00300228173411793	0	0	0	-0.00600456346823586	0.00490535704494264	-0.00805530754694141	-0.0150114086705896	-0.0140598710151773	-0.00300228173411793	0.0107622517452976
1637	-0.00149956512611343	0	0	0	0	-0.00149956512611343	0	0	0	0	0.00355922551252847	0	0	0	0	0	0	0	0	0	0	0	0	-0.00149956512611343	0	0	0	0	0	0	0	0	0	0	0	-0.00149956512611343	0.00355922551252847	0	0	0	0	0	0	0.00355922551252847	0	0	-0.00149956512611343	0	0
1638	0	0	0	0	0	0	0	0	0	0	0	0	0	0	0	0	0	0	0	0	0	0	0	0	-0.0367917586460633	0	0	0.379205966954312	0	0	0	0	0.315656565656566	0	0	0.242073048364439	0	0	0	0	0	0	0.0263395544852498	0	0	0	-0.078600575289317	0	0
1639	0.124378109452736	0	0	0	-0.047438330170778	0	0.248756218905473	0	0	0	0	0	0	-0.047438330170778	0	0	0	-0.047438330170778	0	-0.047438330170778	0	0	-0.094876660341556	0	0	0.124378109452736	-0.094876660341556	-0.142314990512334	0	0	0	0	0.076939779281958	-4.65957687841629	-0.569259962049336	1.31316850283686	-0.492320182767378	0	0.124378109452736	0	0	0	0.248756218905473	-0.047438330170778	0.248756218905473	0	0.212882456786277	0	0
1640	0	0	0	0	0	0	0	-0.00623247117482082	0	0	0	0	0	0	0	0	0	0	0	0	0	0	0	0	0	0	-0.00623247117482082	0	0	0	-0.00623247117482082	0	0	0	0	0	0	0	0	0	0	0	0	0	0	0	0	0	-0.00623247117482082
1641	0	0	0	0	0	0	0	0	0	0	0	0	0	0	0	0	0	0	0	0	0	0	0	0	0	0	0	0	0	0	0	0	-0.00764409111756612	0	0	0	0	0	0	0	0	0	0	0	0	0	0	0	0
1642	-0.0632111251580278	0	0	0	0	0	0.105263157894737	0	0	0	0	0	0	0	0	-0.0632111251580278	0	0	0	0	0	0.105263157894737	0	0	0	0	0	0	0	0	0	0	0	0	0	0	0	0	0	0	0	0	0	0	0	0	0	0	0.105263157894737
1643	0	0	-0.00332502078137988	0	0	0	0	-0.0166251039068994	0	0	0	-0.00332502078137988	0	0.0080927011520114	0	-0.0144572791196325	0	0	0.00216782478726696	0	0.0262993610423421	0	0	-0.00722863955981623	-0.0195180938921817	0	0	-0.0033326915881591	0	0	0.0102605259392783	0	0.00274642278432342	0	0	0.0080927011520114	0	0.00549284556864684	0.0241392070618543	0.00274642278432342	0	0	0.0125749179275041	0	0.0711138579904912	0	0	0.0208141862804744	0
1644	0	0	0	0	0	0	0	0	0	0	0	0	0	0	0	0	0	0.0170706725844998	0	0	0	0	0	0	0	0	0	0	0	0	0	0	0	0	0	0	0.0170706725844998	0	0	0	0	0	0	0	0	0	0	0	0
1645	0.232155436929712	0	0	0.0376553085355694	0.238379022646007	-0.0877577885037297	0.100518754174117	0	0.0157158614096369	0.0314317228192743	0	-0.0658183413777973	-0.153576129881527	-0.0877577885037297	0	0	0.0157158614096369	0.178784266984505	-0.109697235629662	-0.0219394471259324	0.0595947556615018	1.39915620729456	0	0	-0.0219394471259324	2.00459603960292	0	-0.0062235857162955	-0.0219394471259324	0.0595947556615018	-0.0658183413777973	0.119189511323004	0.0376553085355694	0.178784266984505	0.351344948252716	0.0595947556615018	-0.0219394471259324	0.0595947556615018	-0.360209635470464	0.238379022646007	-0.0658183413777973	-0.0877577885037297	-0.313375845479349	0.119189511323004	-0.0658183413777973	-0.015088272934044	-0.131636682755595	-0.503979695420855	-0.0877577885037297
1646	0	0	0	0	0	0	0	0.0774593338497289	0	0	0	0	0	0	0	0	0	0	0	0	0	0	0	0	0	0	0	0	0	0	0	0	0	0	0	0	0	0	0	0	0	0	0	0	0	0	0	0	0
1647	0	0	0	0	0	0	0.0286368843069874	0	0	0	0	0	0	0	0	0	0	0	0	0	0	0	0	0	0	0	0	0	0	0	0	0	0	0	0	0	0	0	0	0	0	0	0	0	0	0	0	0	0
1648	0	0	0	0	0	0	0	0	0	0	0	0	0	0	0	0	0	0	0	0	0	0	0	0	0	0	0	0	0	0	0	0	0	0	0	0	0	0	0	0	0	0	0	0	0	0	0	0	0
1649	0	0	0	0	0	0	0	0	0	0	0	0	0	0	0	0	0	0	0	0	0	0	0	0.0605326876513317	0	0	0	0	0	0	0	0	0	0	0	0	0	0	0	0	0	0	0	0	0	0	0	0	0
1650	0	-0.0382165605095541	0	0	0.0135998912008704	0	0	0	0	0	0	0	0	0	0	0.0135998912008704	0	0	0	0	0	0	0	0	0	0	0.0271997824017408	0	0	0	0	0.0135998912008704	0	0	0	0	0	0	0	0	0	0	0	0	0	0	0	0	0
1651	0	0	0	0	0	0	0	0	0	0	0	0	0	0	0	0	0	-0.0286532951289398	0	0	-0.0378829623098964	0	0	0	0	0.0869241789728893	0	0	0	0.106347806920873	0	0	0	0	0	0	0	0	0	0	0	0	0	0	0	0	0	0	0
1652	0	0	-0.00294550810014728	0.012202562538133	0	0	-0.00883652430044183	0	0	0	0.024405125076266	0	-0.00294550810014728	0	0	0	0	0	0	0	0	0	0.024405125076266	0	-0.00294550810014728	0	0	0	0	0	0.024405125076266	0.012202562538133	0	-0.00589101620029455	0	0.012202562538133	0	0	0.0462852721899286	-0.00589101620029455	0	0	0	0	0	-0.00883652430044183	0	-0.00589101620029455	0.0235622676638383
1653	0	0	0	0	0	0	0	0	0	0	0	0	0	0	0	0	0	0	0	0	0	0	0	0	0	0	0	0	0	0	0	0	0	0	0	0	0	0	0	0	0	0	0	0	0	0	0	0	0
1654	0	0	0	0	0	0	0	0	0	0	0	0	0	0	0	0	0	0	0	0	0	0	0	-0.00621890547263682	0	0	0	0	0	0	-0.00621890547263682	0	0	0	0	0	0	0	0	0	0	0	0	0	0	0	0	0	0
1655	-0.0107776041386	0.0673060743732122	0	0	-0.0215552082772	-0.0107776041386	0	-0.00538880206929999	0	0	0	0	0	0	-0.0161664062079	0	-0.00538880206929999	0	0	-0.00538880206929999	0	0	0	0	0	0	0	0	0	0	0	0	0	0	0	0	0	0	-0.0161664062079	0	0	0	0	0	0	0	0	0	0
1656	0	0	0	0	0	0	0	0	0	0	0	0	0	0	0	0	0	0	0	0	0	0	0	0	0	0	0	0	0	0	0	0	0	0	0	0	0	0	0	0	0	0	0	0	0	0	0	0	0
1657	0	0	0	0	0	0	0	-0.0445037828215398	0	0	0	0.0569476082004556	0	0	0	0	0	-0.0445037828215398	0	0	-0.0445037828215398	0	0	-0.0445037828215398	0	0	0	0	0	0	0	0	0	0	0	0	0	0	0	0	0	0	0	-0.0445037828215398	0	0	0	0	0
1658	0	0	0	-0.018964536317087	-0.0953676194497683	-0.018964536317087	0	0	0	0	0	0	0	0	0	0	0	0	0	0	0	0	0	0	-0.018964536317087	0	0	0	0	0	0	0	-0.0568936089512611	0	0	0	0	0	0	0	0	0	0	0	0	0	0	0	0
1659	0.0496920318192226	0	0	0	-0.187705302674801	0.292620778614291	0	-0.281557954012201	0.19876812727689	0.052457737969745	0	-0.0938526513374003	-0.328484279680901	-0.0469263256687001	-0.0938526513374003	-0.419571224867779	-0.276026541711156	-0.0469263256687001	-0.132481858554533	-0.322952867379857	-0.132481858554533	0.966183574879227	-1.01025351550723	-0.924697982621386	-0.610042233693102	-0.209740272988796	-0.347753543844373	-0.226334509891934	-0.325718573530378	-0.187705302674801	0.193236714975845	-0.469263256687001	-0.281557954012201	-0.0938526513374003	-0.1407789770061	0	0	-0.0469263256687001	0.00276570615052241	-0.1407789770061	0	0.0496920318192226	0	0	0	0	0	0	0
1660	0	0	0	0	0	0	0.0313766309422845	0	0	0	0.133002647202447	0	0	0	0	0	0	0	0	0.203252032520325	0	0	0	0.101626016260163	0	0	0.304878048780488	0	0	0.133002647202447	0	0	0.203252032520325	0	0	0.101626016260163	0	0	0	0	0	0	0	0	0	0	0	0	0
1661	0	0	0	-0.00732225232481511	0	0	-0.0146445046496302	0	-0.0146445046496302	0	0	0	0	0	0	0	0	0	0	-0.0146445046496302	-0.00732225232481511	0	0	0	0	0	0	0	0	0	-0.00732225232481511	0	0	0	0	0	0	0	0	0	0	0	0	0	0	0	0	0	0
1662	0.0475285171102662	0	0	0	0	0	0	0	0	0	0	0	0	0	0	0	0	0	0	0	0	0	0	0	0	0	0	0	0	0	0	0	0	0	0	0	0	0	0	0	0	0	0	0	0	0	0	0	0
1663	0	0	0	0	0	0	0	0	-0.0200662185211197	0	0	0	0	0	0	0	0	0	0	0	0	0	0	0	0	0	0	0	0	0	0	0	0	0	0	0	0	0	0	0	0	0	0	0	0	0	0	0	0.0070193719447525
1664	0	0	0	0	0	0	0	0	0	0	0	0	0	0	0	0	0	0	0	0	0	0	0	0	0	0	0	0	0	0	0	0	0	0	0	0	0	0	0	0	0	0	0	0	0	0	0	0	0
1665	0	0	0	0	0	0	0	0	0	0	0	0	0	0	0	0	0	0	0	0	0	0	0	0	0	0	0	0	0	-0.0059509640561771	0	0	0	0	0	0	0	0	0	0	0	0	0	0	0	0	-0.0059509640561771	0	0
1666	0	0	0	0	0	0	0	0	0	0	0	0	0	0	0	0	0	0	0	0	0	0	0	0	0	0	0	0	0	0	0	0	0	0	0	0	0	0	0	0	0	0	0	0	0	0	0	0	0
1667	0	0	0	0	0	0.0058836931901947	0	0	0	0	0	0	0	0	-0.0112044817927171	0	0	0	0	0	0	0	0	0	0	0	0	-0.0112044817927171	0	0	0	0.0170881749829118	0	0	0	0	0	0	0	0	-0.0112044817927171	0	0	0	0	0	0.0170881749829118	0	0
1668	0.00264865580717786	0	0	0	0	0	0	0	-0.00330731578251091	0	0	0	0	0	0.00132432790358893	0	0	0	0.00132432790358893	0	0	0	-0.00496097367376637	0	0	-0.00165365789125546	0.00132432790358893	0	0	0	0	0	-0.00032932998766653	0	0	0	0	0	0	0	0	0	0	0	0	0	0	0	0
1669	0	0	0	0	0	0	0	0.0193535900909619	0	0	0	0	0	0	-0.0112485939257593	0	0	0	0	0	0	0	0	0	0	-0.0112485939257593	0	0	0	0	0	0	0	0.0387071801819237	0	0	0	0	0	0	0	0	0	0	0	0	0	0	0
1670	0	0	0	0	0	0	0	0	0	0	0	0	0	0	0	0	0	0	0.0287150035893754	0	0	0	0	0	0	0	0	0	0	0	0	0	0	0	0	0	-0.0130548302872063	0	0	0	0	0	0	0	0	-0.0130548302872063	0	0	0
1671	0	0	0	0	0	0	0	0	0	0	0	0	0	0	0	0	0	0	0	0	0	0	0	0	0	0	0	0	0	0	0	0	0	0	0	0	0	0	0	0	0	0	0	0	0.0992063492063492	0	0	0.219187675070028	0
1672	0	0	0	0	-0.0212607632614011	0	0	0	0	0	0	0	0	0	0.0289603243556328	0	0	0.0289603243556328	0	0	0	0	0	0	0	0	0	0.0289603243556328	0	0	0	0	0	0	0	0	0	0	0	0	0	0	0	0	-0.0212607632614011	0	0	0	0
1673	0	0	0	-0.0117240166481036	0	-0.00293100416202591	0	-0.00293100416202591	-0.0205170291341814	0	0	-0.00586200832405182	0	0	-0.0117240166481036	-0.00879301248607773	0	0.00230515663539338	0	-0.00586200832405182	0	-0.00293100416202591	-0.00586200832405182	-0.00879301248607773	0	0	-0.00586200832405182	0	0	0	0	-0.00293100416202591	0	-0.00293100416202591	0	0	0	0	0	0	0	0	0	-0.0234480332962073	0	0	-0.00586200832405182	0	0
1674	0	0	0	0	0	0	0	0	0	0	0	0	0	0	0	0	0	0	0	0	0	0	0	0	0	0	0	0	0	0	0	0	0	0	0	0	0	0	0	0	0	0	0	0	0	0	0	0	0
1675	0	0	0	0	0	0	0	0	0	0	0	0	0	0	0	0	0	0	0	0	0	0	0	0	0	0	0	0	0	0	0	0	0	0	0	0	0	0	0	0	0	0	0	0	0	-0.0872817955112219	0	0	-0.0574086201853522
1676	0	0	0	0	0	0	0	0	0	0	0	0	0	0	0	0	0	0	0	0	0	0	0	0	0	-0.108616944243302	0	0	0	-0.064613805015515	0	0	0	0.240626361926663	0	0.0220015696138935	0	0	0.0582072176949942	0.116414435389988	0	-0.0362056480811007	0	0	0	0	0	0	0
1677	0	0	0	0	0	0	0	0	0	0	0	0	0	-0.0487092060399415	0	0	-0.0487092060399415	0	0	0	0	0	0.089126559714795	0	0	0	0	0	0	0	0	0	0	0	-0.0487092060399415	0	0	0.133689839572193	0.0445632798573975	0	0	0	0	0	0	0	0.0445632798573975	0	0
1678	-0.00810668396092578	0	0	0	0	0	0	0	0	0	0	0	0	0	0	0	0	0	0.112912151175988	-0.00810668396092578	0	0	0	0	0	0	0.0415122522861683	0	-0.0324267358437031	0	0	0.0126494421821584	0	0	-0.0187524571619036	-0.00810668396092578	0	0.0465904307662723	-0.00405334198046289	0	0.43993199098523	-0.0243200518827773	-0.00405334198046289	0.0151885314222104	0.104713459178859	-0.00405334198046289	-0.00810668396092578	0	0
1679	0	0	0	0	0	0	0	0	0	0	0	0	0	0	0	0	0	0	0	0	0	0	0	0	0	0	0	0	0	0	0	0	0	0	0	0	0	0	0	0	0	0	0	0	0	0	0	0	-0.0133413381362151
1680	0	0	0	0	0	0	0	0	0	0	0	0	0	0	0	0	0	0	0	0	0	0	0	0	0	0	0	0	0	0	0	0	0	0	0	0	0	0	0	0	0	0	0	0	0	0	0	0	0
1681	0	0	0	0	0	0	0	0	0	0	0	0	0	0	0	0	0	0	0	0	0	0	0	0	0	0	0	0	0	0	0	0	0	0	0	0	0	0	0	0	0	0	0	0	0	0	0	0	0
1682	0	0	0	0	0	0	0	0	0	0	0	0	0	0	0	0	0	0	0	0	-0.0258064516129032	0	0	0	0	0	0	0	0	0	0	0	-0.0516129032258065	0	0	0	0	0	0	0	0	0	0	0	0	0	0	0	0
1683	0	0	0	0	0	0	0	0	0	0	0	0	0	0	0	0	0	0	0	0	0	0	0	0	0	0	0	0	0	0	0	0	0	0	0	0	0	0	0	0	0	0	0	0	0	0	0	0	0
1684	0	0	0	0	0	0	0	0	0	0	0	0	0	0	0	0	0	0	0	0	0	0	0	0	0	0	0	0	0	0	0	0	0	0	0	0	0	0	0	0	0	0	0	0	0	0	0	0	0
1685	0	0	0	0	0	0	0	0	0	0	0	0	0	0	0	0	0	0	0	0	0	0	0	0	0	0	0	0	0	0	0	0	0	0	0.017825311942959	0	0	0	0	0	-0.00942329438371655	0	0	0	0	0	0	0	0
1686	0.169662939976899	0	0	0	0	0	0	0	0.0413564929693962	0	0	0	0	0	0	0	0	0	0	0	0	0	0	0	0.0413564929693962	0	0	-0.0371195248700817	0.124069478908189	0	0	0	0	0	-0.0371195248700817	0	0	-0.0371195248700817	0	0	0	0	0	-0.0371195248700817	0	0	0	0	0
1687	0	0	0	0	0	0	0	0	0	0	0	0	0	-0.087260034904014	0	0.119502119578988	0	0	0	0	0	0	0	0	0	0	0	0	0	0	0	0	0	0	0	0	0	0	0	0	0	-0.043630017452007	0	0	0	0	0	0	0
1688	0	-0.00682920166632521	0	0	0.0113679424024252	0	0	0	0	0	0	0	0	0	-0.0034146008331626	0	0	0	0.00378931413414172	0	0	0	0	0	0	0	0	0	0	0	-0.0034146008331626	0	0	0	0	0.00378931413414172	-0.0034146008331626	0	0	0	0	0	0	0	0	0	0	0	0
1689	0	0	0.013502931987301	-5.82372455640596e-05	0.00985610092647349	0	-0.0402397251437907	0	0.00486981321767269	0	0.063191097338617	0.0442359796780026	0.00492805046323674	0	0	0	0	0.0094484402075251	0	0	0	0	0	0	0.00492805046323674	0	0	0	0	0	0	0.0147841513897102	0	0	0	0	0	0	0	0	0	0.0147259141441462	0	0	0	0	0	0	0
1690	0	0	0	0	0	0	0	0	0	0	0	0	0	0	0	0	0	0	0	0	0	0	0	0	0	0	0	0	0	0	0	0	0	0	0	0	0	0	0	0	0	0	0	0	0	0	0	0	0
1691	0	0	0	0	0	0	0	0	0	0	0	0	0	0	0	0	0	0	0	0	0	0	0	0	0	0	0	0	0	0	0	0	0	0	0	0	0	0	0	0	0	0	0	0	0	0	0	0	0
1692	0	0	0	0	0	0	0	0	0	0	0	0	0	0	0	0	0	0	0	0	0	0	0	0	0	0	0.02	0	0	0	0	0	0	0	0	0	-0.0570017100513015	0	0	0	0	0	0	0	0	0	0	0	0
1693	0	0	0	0	0	0	0	0	0	0	0	0	0	0	0	0	0	0	0	0	0	0	0	0	0	0	0	0	0	0	0	0	0	0	0	0	0	0	0	0	0	0	0	0	0	0	0	0	0
1694	0	0	0	0	0	0	0	0	0	0	0	0	0	0	0	0	0	0	0	0	0	0	0	0	0	0	0	0	0	0	0	0	0	0	0	0	0	0	0	0	0	0	0	0	0	0	0	0	0
1695	0	0	0	0	0	0	0	0	0	0	0	0	0	0	0	0	0	0	0	0	0	0	0	0	0	0	0	0	0	0	0	0	0	0	0	0	0	0	0	0	0	0	0	0	0	0	0	0	0
1696	0	0	0	0	0	0	0	0	0	0	0	0	0	0	0	0	0	0	0	0	0	0	0	0	0	0	0	0	0	0	0	0	0	0	0	0	0	0	0	0	0	0	0	0	0	0	0	0	0
1697	0	0	0	0	0	0	0	0	0	0.0506585612968592	0	0	0	0	0	0	0	0	0	0	0	0	0	0	0	0	0	0	0	0	0	0	0	0	0	0	0	0	0	0	0	0	0	0	0	0	0	0	0
1698	0	0	0	0	0	0	0	0	0	0	-0.0023470872647045	-0.004694174529409	-0.0023470872647045	0	0	0	0	0	0	0	0	0.00618831028187753	0	0	0	0	0	0	0	0	0	0	0	0	0.00309415514093877	0	0	0	0	0	0	0	0	0	0	0	0	0	0
1699	0	0	0	0	0	0	0	0	0.114471983003552	0	0	0	0	0	0.0268744961031981	0	-0.00995024875621891	0.0268744961031981	0	0	0	-0.0199004975124378	0	0	0	0	0	0	0	0	0	0	0	-0.00995024875621891	0	-0.00995024875621891	0	0	0	0	0	0	0	0	0	0	0	0	0
1700	0	0	0	0	0	0	0	0	0	0	0	0	0	0	0	0	0	0	0	0	0	0	0	0	0	0	0	0	0	0	0	0	0	0	0	0	0	0	0	0	0	0	0	0	0	0	0	0	0
1701	0	0.0342700479780672	0	0	0	0	0.0342700479780672	0	0	-0.0450755014649538	0	0	0	0	0	0	0	0	0	0	0	0.0685400959561343	0	0	0	0	0	0	0	0.0460023452236574	0	0	0	0	0	0	0	0	0	0	0	0	0	0	0	0	0	0	0
1702	0	0	0	0	0	0	0.00603901201763392	0	0	0	-0.016597510373444	0	0	0	0	0	0	0	0	0	-0.0033195020746888	0	0	0	0	0	0	0	0	0	0	0	0	0	0	0	0	0	0	0	0	0	0	0	0	0	0	0	0
1703	0	0.253807106598985	0	0	0	0	0.693347800396001	0	0	0	0	0.253807106598985	0	0	0	0	0	0	0	0	0.126903553299492	0	0	0	0	0	0	0	0	0.126903553299492	0	0	0	0	0	0	0	0	0	0	0	0	0	0	0	0	0	0	0
1704	0.00216206866730087	0	0	0.00216206866730087	0	0	0	0	0	0	0	0.00432413733460175	-0.00638131550819201	-0.001595328877048	-0.00319065775409601	0.00432413733460175	0	-0.00319065775409601	0	0	0.00432413733460175	0	0.00056673979025287	0	0.00432413733460175	-0.001595328877048	-0.00319065775409601	0	0.00648620600190262	0	0	-0.001595328877048	0	0	0	0	0	0	0	0	0	0	0	0	0	-0.001595328877048	0	0	-0.00319065775409601
1705	0	0.0285476230697825	0	-0.012647021626407	0	0	0.0205973223480947	0	0	0	0	0.0159006014433755	0.0205973223480947	0	0	0	0	0	0	0	-0.012647021626407	0.0205973223480947	0	0	0	0	0	0	0	0	0	0	0	0	0	0	0	0	0	0	0	0	-0.0758821297584419	0	0	0	0	0	0
1706	0.0264061262212833	0	0	0	0.0528122524425667	0	0	0	0.0264061262212833	0	0	0	0	0	0	0	0	0	0	0	0	0	0	0	0	0	0	0	-0.0165289256198347	0	0	0	0	0	0	0	0	0	-0.0165289256198347	0	0	0	0	-0.0165289256198347	0	0	0	0	0
1707	0	0	0	0	0	0	0	0	0	0	0	0	0	0	0	0	0	0	0	0	0	0	0	0	0	0	0	0	0	0	0	0	0	0	0	0	0	0	0	0	0	0	0	0	0	0	0	0	0
1708	0	0	0	0	0	0	0	0	0	0	0	0	0	0	0	0	0	0	-0.0209205020920502	0	0	0.027693159789532	0	0	0	0	0	0	0	0	0	0	0	0	0	0	0	0	0	0	0	0	0	0	0	0	0	0	0
1709	0	0	0	0	0	0	0	0	0	0	0	0	0	0	0	0	0	0	0	0	0	0	0	0	0	0	0	0	0	0	0	0	0	0	0	0	0	0	0	0	0	0	0	0	0	0	0	0	0
1710	0	0	0	0	0	0	0	0	0	0	0	0	0	0	0	0	0	0	0	0	0	0	0	0	0	0	0	0	0	0	0	0	0	0	0	0	0	0	0	0	0	0	0	0	0	0	0	0	0
1711	0.0222172850477672	0.0444345700955343	0.0669577159260125	0	0	0	0.0222172850477672	0	0	0	-0.0165864985901476	0	0.100130713106308	0	0	0	0	0	0	0	0	0	0	0	0	0	0	0	0	0	0	0	0	0	0	0	0	0	0.0447404308782455	0	0	0	-0.0165864985901476	0	0	0	0	0	0
1712	0	0	0	0	0	0	0	0	0	0	0	0	0	0	0	0	0	0	0	0	-0.0246244767298695	0	0	0	0	0	0	0	0	0.0144780657304184	0	0	0	0	0	0	0	0	0	0	0	0	0	0	0	0	0	0	0
1713	-0.001923051052435	0	0	0	-0.048304800314863	0	-0.141365811222271	-0.0108742931709439	0	-0.000961525526217489	0	0	-0.04001757134002	-0.0108742931709439	0.017535983475904	0.00991276764472641	0.198186364515965	0.0396510705789056	0	0.014056382132148	0	-0.0108742931709439	-0.0067306786835223	0.0297383029341792	0	-0.0652457590256633	0	0.350128956526629	0.0198255352894528	0	0	-0.0227101118681053	0.0693893735130849	0	0	0	0	0	0	0	-0.0108742931709439	-0.0028845765786525	0.00991276764472641	0	0	0	0	0	0
1714	0	0	0	0	0	0	0	0	0	0	0	0	0	0	0	0	0	0	0	0	0	0	0	0	0	0	0	0	0	0	0	0	0	0	0	0	0	0	0	0	0	-0.0050534509551235	0.0250657977190124	0.0024931493014609	0.098311516527201	0.0125328988595062	0.0062664494297531	-0.0037733001282922	0
1715	0	0	0	0	0	0	0	0	0	0	0	0	0	0	0	0	0	0	0	0	0	0	0	0	0	0	0	0	0	0	0	0	0	0	-0.16273393002441	0	0	0	0	0	0	0	0	0	0	0	0	0	0
1716	0	0	0.0255918106206014	0	0	0.0127959053103007	0	0	0	0	0	0	0	-0.00858516483516484	0	0	0	0	0	0	0	0	0	0	0	0	0.0127959053103007	0	0	0	0	0	0	0	-0.00858516483516484	0	0	0	0	0	0	0	0.0511836212412028	0	0	0	0.0170066457854366	0	0
1717	0	0	0	0	0	0	0	0	0	0	0	0	0	0	0	0	0	0	0	0	0	0	0	0	0	0	0	0	0	0	0	0	0	0	0	0	0	0	0	0	0	0	0	0	0	0	0	0	0
1718	0	0	0.0151423379769836	0	0	0	0	0	0	0	-0.0096818242075427	0	0	0	0	0	0	-0.0413736036408771	0	0	0	0	0	-0.00827472072817542	0	0	-0.0566838417658888	-0.00827472072817542	0	0	0	-0.0014071034793672	0	0	0	0	0	-0.0165494414563508	0	0	0	0	0	0	0	0	0	0	0
1719	0.00658891744086447	-0.00514986095375425	0	0	0	0	0.0263556697634579	0	-0.00257493047687712	0	-0.00772479143063137	0	0	-0.00257493047687712	0	0	0	0	0	-0.00257493047687712	0	0	0	-0.00257493047687712	0	-0.00514986095375425	0	0	0	0	0	-0.00514986095375425	0	0	0	0	-0.00257493047687712	0	0	0	0	0	0	-0.00257493047687712	0	-0.00257493047687712	0	0.00658891744086447	-0.0102997219075085
1720	0	0	0	0	0	0	0	0	0	0	0	-0.078740157480315	0	0	0	0	0	0	0	0	0	0	0	0	0	0	0	0	0	0	0	0	0	0	0	0	0	0	0	0	0	0	0	0	0	0	0	0	0
1721	0	0	0	0.0473036896877956	-0.0220264317180617	0.0236518448438978	-0.110132158590308	-0.0220264317180617	0.0236518448438978	-0.066079295154185	0	0	0	0.0473036896877956	-0.0220264317180617	0	0	0.0473036896877956	0	0	-0.0440528634361234	0	0.0269026710955701	0	0	0.0236518448438978	-0.0440528634361234	0	-0.0204010185922256	0.0473036896877956	0	0	0.0236518448438978	0	0	0	-0.0220264317180617	0.0709555345316935	0.0236518448438978	0	0	-0.0220264317180617	0	0	0	0	0	0	0
1722	0	0	0	0	0	0	0	0	0	0	0	0	0	0	0	0	0	0	0	0	0	0	0	0	0	0	0	0	0	0	0	0	0	0	0	0	0	0	0	0	0	0	0	0	0	0	0	0	0
1723	0	0	0	0	0	0	0	0	0	0	0	0	0	0	0	0	0	0	0	0	0	0	0	0	0	0	0	0	0	0	0	0	0	0	0	0	0	0	0	0	0	0	-0.00732225232481511	0	0	0	0	0	0
1724	0	0	0	0.0785957558291852	0	0	0	0	0	0	0	0	0	0	0	0	0	0	0.0261985852763951	0	0	0	0	0	0	0	0	0	0.0689091736414652	0	0	0	0	0	0	0	0	0	0	0	0	0	0	0.0666340333411469	0	0	0	0	0
1725	0	-0.0904159132007233	-0.180831826401447	0	0	0	0	0	0.246609124537608	0.123304562268804	0	0	0	0	0	0	-0.180831826401447	0	0.0328886490680807	0	0.123304562268804	0	0	-0.0904159132007233	0	0	-0.27124773960217	0	0	0	0	-0.0904159132007233	0	0	0	0	0	0	0	0	0	0	0	0	0	-0.0904159132007233	0	-0.0904159132007233	0
1726	0	0	0	0	0	0	-0.00415489446568057	0	0	0	0	0	0	0	0	0	0	0	0	0	0	0	0	0	0	0	0	0	0	0	0	0	0	0	0	0	0	0	0	-0.0404878992101141	0	0	0	0	0	0	0	0	-0.0280232158130724
1727	0	0	0	0	0	-0.0746825989544436	0	0	0	0	0	0	0	0	0	0	0	0	0	0	0	0	0	0	0	0	0	0	-0.0746825989544436	0	0	0	0	0	0	0	0	0	0	0.0595238095238095	0	0	0	0	0.0595238095238095	0.119047619047619	0	0.297619047619048	0
1728	0	0	0	0	0	0	0	0	0	0	0.0713266761768902	0	0	0	0	0	0	0	0	0	0	0	0	0	0	0	0	0	0	0	0	0	0	0	0	0	0	0	0	0	0	0	0	0	0	0	0	0	-0.0694444444444444
1729	0	0	0	0	0	0	0	0	0	0	0	0	0	0	0	0	0	0	0	0	0	0	0	0	0	0	0	0	0	0	0	0	0	0	0	0	0	0	0	0	0	0	0	0	0	0	0	0	0
1730	0	0	0	0	0	0	0	0	0	0	0	0	0	0	0	0	0	0	0	0	0	0	0	0	0	0	0	0	0	0	0	0	0	0	0	0	0	0	0	0	0	0	0	0	0	0	0	0	0
1731	0	0	0	0	0	0	0	0	0	0	0	0	0	0	0	0	0	0	0	0	0	0	0	0	0	0	0	0	0	0	0.0166251039068994	0	0	0	0	0	0	0	0	0	0	0	0	0	0	0	0	0	0
1732	0	0	0	0	0	0	0	0	0	0	-0.171086398631309	0	0	0	-0.0855431993156544	0	0	0	0	0.815357701585247	0.45045045045045	0	0	0.225225225225225	0	0	0	0	-0.0855431993156544	0	0	0	0	0	0	-0.0855431993156544	0	0	0	0	0	0	0	0	0	0	0	0	0
1733	0	0	0	0	0	0	0	0	0	0	0	0	0	0	0	0	0	0	0	0	0	0	0	0	0	0	0	0	0	0	0	0	0	0	0	0	0	0	0	0	0	0	0	0	0	0	0	0	0
1734	0	0	0.00408580183861083	0	0.00408580183861083	0	0	0	0.00408580183861083	0	-0.00394773202794994	0.00408580183861083	0	0	0	0	0	0	0	0	0	0	0	0	0	0	0	0	0	0	0	0	0	0	0	0	0	0	0.0163432073544433	0	0	0	0	0	0.00408580183861083	0.0163432073544433	0	0	0
1735	0	-0.778473212182947	-0.0437732545414752	0	-0.153206390895163	0	0	0	0	0	0	0	0	0	0	0	-0.0218866272707376	0.0316856780735108	0	0	0	0	0	0.0097990508027732	0	0.041484728876284	0	0	0.0316856780735108	0	0	0	0	-0.131319763624425	0	0	-0.0120875764679644	0	0	-0.0437732545414752	0	0	0.0316856780735108	0	0	0	0	0.0316856780735108	0
1736	-0.0291630212890055	0	0	0	0	0	-0.0291630212890055	-0.0874890638670166	0	-0.0291630212890055	0	0.0911577028258888	-0.0583260425780111	0	0	0	0	0	0	0	-0.0291630212890055	0	0	0	0	-0.0583260425780111	0	-0.0583260425780111	-0.0874890638670166	-0.0291630212890055	0	0	0	0	0	0	0.0911577028258888	0	0	0	0	0	0	0	0	-0.0291630212890055	0	0	0
1737	0	0	0	0	0	0	0	0	0	0	0	0	0	-0.0335908632851864	0	0	0	0	0.137362637362637	0	0	0	0	0	-0.0335908632851864	0	0	0	0	0	0	0	0	0	0	0	0	0	0	0	0	0	0	0	0	0.0457875457875458	0	0.0457875457875458	0
1738	0	0	0	0	0	0	0	0	0	0	0	0	0	0	0	0	0	0	0	0	0	0	0	0	0	0	0	0	0	0	0	0	0	0	0	0	0	0	0	0	0	0	0	0	-0.109210047324354	0	0	0	0
1739	0	0	0	-0.102986611740474	0	0	-0.0316881882278381	0	0	0	-0.0237661411708786	0	0	0	0	0	0	-0.00792204705695952	0	0	0	0	0	0	0	0	0	0	0	0	0	0	0	0	0	0	0	0	0	0	0	0	0	0	0	0	0	0	0
1740	0	0	0	0	0	0	0	0	0	0	0	0	0	0	0	0	0	0	0	0	0	0	0	0	0	0	0	0	0	0	0	0	0	0	0	0	0	0	0	0	0	0	0	0	0	0	0	0	0
1741	0	0	0	0	0	0	0	0	0	0	0	0.0228050171037628	0	0	0	0	0	0	-0.0309789343246592	-0.0619578686493185	0	0	0	0.0228050171037628	0	0	0	0	0	0	0	0	0	0	0	0	0	0	0	0	0	0	0	0	0	-0.0309789343246592	0	0	0
1742	2.15808671329603	-1.12446075944728	2.72167066073266	1.0962232545432	0.68448878038134	0.28479064680546	0.29078799297977	-0.19641308720891	-0.25130546399885	-0.150100247307233	-0.25388765471279	-0.059182145234067	0.402280324289835	0.040315493727359	0	0.203285046366983	-0.027446188394969	0.175838857972014	-0.476039352586481	-0.440013627303252	0.025738610664781	-0.662165325176942	0.188708163304405	-0.213572160985431	-0.027446188394969	0.012869305332391	-0.281333843107758	-0.0317359568390987	0.103787407405556	-0.344805756785956	-0.109784753579874	0.487201080188684	0.31994175910493	0.79427353396122	0.0857953688826001	0.00345680369769008	-0.97694270285399	-0.74450389036185	-0.31477737767704	-0.61756006300545	-0.444303395747382	-0.336226219897695	-0.8482912977674	-0.137230941974842	0.36883678972055	-1.25656896823156	-0.0145768830625781	0.69906566344392	-0.164677130369811
1743	0	0	0	0	0	0	0	0	0	0	0	0	0	0	0	0	0	0	0	0	0	0	0	0	0	0	0	0	0	0	0	0	0	0	0.0288517022504328	0	0.0288517022504328	0	0	0	0	0	0	0	0	0	0	0	0
1744	0	0	0	0	0	0	0	0	-0.0124347177319075	0	0	0	0	0	0	0	0	0	0	0	0	0	0	0	0	0	0	0	0	0	0	0	0	0	0	0	0	0	0	0	-0.0186520765978612	0	0.0060975283763208	0	0	0	0	-0.00621735886595374	0
1745	0	0	0	0	0	0	0	0	0	0	0	0	0	0	0	0	0	0	0	0	0	0	0	0	0	0	0	0	0	0	0	0	0	0	0	0	0	0	0	0	0	0	0	0	0	0	0	0	0
1746	0	0	0	0	0	0	0	0	0	0	0	0	0	0	0	0	0	0	0	0	0	0	0	0	0	0	0	0	0	0	0	0	0	0	0	0	0	0	0	0	0	0	0	0	0	0	0	0	0
1747	0	0	0	0	0	0	0	0	0	0	0	0	0	0	-0.0760167236792094	0	0	0	-0.179530035181248	0	0	0	0	0	0	0	0	0	0	0	0	0	0	0	0	0	0	0	0	0	0	0.0485201358563804	0	0	0	0	0	0	0
1748	0	0	0	0	0.0251256281407035	0	0.100502512562814	0	0	0	0	0.0251256281407035	0	0	0	0.050251256281407	0	0	0	0	0	0	0	0.0251256281407035	0	0.0251256281407035	0	0	0	0	0	0	0	0	0	0	0	0	0	0	0	0	0	0	-0.011832919181162	0	0	0	0
1749	0	0	0	0	0	0	0	0	0	0.0255558395093279	0	0	0	0	0	0	0	0	0	0	0	0	-0.0168548794876117	0	0	0	0	0	0.0511116790186558	0	0	0	0	0	0	0	-0.0081539194658954	0	0	0.0255558395093279	0	0	0	0	0	0	0	0	0
1750	-0.0469704086425552	-1.0312523400113	0.0579710144927536	0.013097255975113	0	0	-2.01553427138005	0.0579710144927536	-0.234852043212776	0	0	0	0	0	0	-0.0469704086425552	0	0	0.115942028985507	0	-0.0939408172851104	0	0	-0.140911225927666	0	0	0	0	-0.0469704086425552	0	0	0	0	0	-0.0469704086425552	0	0	0.0579710144927536	0	0	0	0	0	0	0	0	0	0	0
1751	-0.00808211428109593	-0.114191394687205	-0.0484926856865756	-0.00808211428109593	0	0	0	0	-0.00808211428109593	-0.0484926856865756	-0.00808211428109593	-0.0323284571243837	-0.0404105714054797	0	-0.0161642285621919	0.011602274045713	-0.0484926856865756	-0.250545542713974	-0.00808211428109593	-0.0161642285621919	-0.10154732588963	-0.0242463428432878	-0.00808211428109593	0.011602274045713	0	-0.00808211428109593	0	-0.0333702518762456	0	-0.348177933329955	-0.00808211428109593	0	0	0.011602274045713	0.01512243381033	-0.0161642285621919	-0.00808211428109593	-0.0161642285621919	-0.093465211608534	-0.0161642285621919	-0.129313828497535	-0.00808211428109593	0.011602274045713	0	0	-0.0965905958641203	-0.0161642285621919	-0.0344120466281076	0
1752	-0.0105887335874629	0	0	0	0	0	0	-0.0105887335874629	0	-0.0105887335874629	0	0	0	0	0	-0.0105887335874629	0	0	0	0	-0.0105887335874629	0	0	0	0.0274423710208562	0	0	0	0	0	0	0	-0.0105887335874629	0	0	0	0	0	0	0	-0.0105887335874629	0	0	0	0	0	0	0	0
1753	0	0	0	0	0	0	0	0	0	0	0	0	0	0	0	0	0	0	0	0	0	0	0	0	0	0	0	0	0	0	0	0	-0.0378653877754933	0	0	0	0	0	0	0	0	0	0	0	0	0	0.0401709397944006	0	0
1754	-0.00299204117048651	0	0	0.00392510892177258	0	0	0	0	-0.00598408234097301	0	0	0	-0.00804305576017342	0	0	0	0	0	0	0	0	0	-0.011968164681946	-0.00299204117048651	0	0	0.00392510892177258	0	0	0	0	0	0	0	-0.00505101458968694	0	0	0	0	0	0	0	0	0	0	-0.00598408234097301	0	0	0
1755	0	0	0	0	0	0	0	0	0	0	0	0	0	0	0	0	0	0	0	0	0	0	0	0	0	0	0	0	0.0353731871241599	0	0	0	0	0	0	0	0	0	0	0	0	-0.038109756097561	0	0	0	0	0	0	0
1756	0	0	0	0	0	0	0	0	0	0	0	0	0	0	0	0	0	0	0	0	0	0	0	0	0	0	0	0	0	0	0	0	0	0	0	0	0	0	0	-0.0602409638554217	0.0348189415041783	0	0	0	0	0	0	0	0
1757	0.00909173561232839	0.0272752068369852	0	0	0	0.0727338848986271	0	0	0	0	0	0	0	0	-0.0332834082210018	0	0	0	0	0	-0.0166417041105009	0	0	0	0	0	0	0	0	0	-0.0166417041105009	0	0	0	0	0	0.00909173561232839	-0.0249625561657514	0	0	-0.0166417041105009	-0.00832085205525046	0	-0.0559333137155194	-0.00832085205525046	-1.18108439062774	0.00986261916940634	0	-0.0824376369954266
1758	0	0	0	0	0	0	0	0	0	0	0	0	0	0	0	0	0	0	-0.00679578661230037	0	0	0	0	0	0	0	0	0	0	0	0	0	0	0	0	0	0	0	0	0	0	0	0	0	0	0	0	0	0
1759	0	0	0	0	0	0	0	-0.0179069009653195	0.187885835764298	0	0	0	0.0290782204129107	0	0	0	0	0.0290782204129107	0	0	0	0	0	0	0	0	0	0	0	0	0	0	0	0	0	0	0	0	0	0	0	0	0	0	0	0	-0.0313234142521535	-0.901752731291972	-0.0022451938392428
1760	0	-0.065610769727344	0	0	0.00182081189140655	0	0	-0.0105293637631946	0	-0.0131617047039933	0.00182081189140655	0	0	-0.0008115290493921	0	0	0	0	0	0	0	0	0	0.00182081189140655	0	0	0	0.0044531528322052	0	0	0	0	0	0	0	0	0	0	0	0	0	0	0	-0.00263234094079865	0	0.0044531528322052	0	0	0
1761	0	0	0	0	0	0.028825089357777	-0.0116699731590617	0	-0.1649889045103	0	0	0	-0.0001399374159509	0	0.0057650178715554	0	-0.0821096243612846	0	0.284262677223169	0.0113900983271599	0.0115300357431108	0.0057650178715554	0.0113201296191844	-0.00583498657953087	0.193519317963334	0.0172950536146662	0.0115300357431108	0	0	0	0.396316890269838	0	0	0	-0.00583498657953087	0	0	0	-0.0176448971545435	0	0.0057650178715554	0	0	0.090421099537524	0	0	0.615037725849065	0.0172250849066907	0.0461201429724432
1762	0	0	0	0	0	0	0	0	0	0	0	0	0	0	-0.0683526999316473	0	0	0	0	0	0	0	0	0	0	0	0	0	0	0	0	0	0	0	0	0	0	0	0	0	0	0	0	0	0	0	0	0	0
1763	0	0	0	0	0	0	-0.0395413206801107	0	0	0	0	0	0	0	0	0	0	0	0.0543773790103317	0	0	0	0	0	0	0	0	0	0	0	0	0	0	0	0	0	0	0	0	0	0	0	0	0	0	0	-0.0395413206801107	0	0
1764	0	0	0	0	0	0	0	0	0	0	0	0	0	0	0	0	0	0	0	0	0	0	0	0	0	0	0	0	0	0	0	0	0	0	0	0	0	0	0	0	0	0	0	0	0	0	0	0	0
1765	0	0	0	0	0	0	0	0	0	0	0	0	0	0	0	0	0	0	0	0	0	0	0	0	0	0	0	0	0	0	0	0	0	0	0	0	0	0	0	0	0	0	0	0	0	0	0	0	0
1766	0	0	0	0	0	0	0.126447766086484	0.0375657400450789	0	0.036858978086622	0	0	0	0	0	-0.0238151940938319	0	0	-0.0714455822814956	0	0	0	0	-0.0576950363302486	0	-0.0238151940938319	0	0	0	0	0	0	0	0	0	-0.0238151940938319	0	0	0	0	0	0	0	0	0	0	0	0	0
1767	0	0	0	0	0	0	0	0	0	0	0	0	0	0	0	0	0	0	0	0	0	0	0	0	0	0	0	0	0	0	0	0	0	0	0	0	0	0	0	0	0	0	0	0	0	0	0	0	0
1768	0	0	0	0	0	0	0	0	0	0	0	0	0	0	0	0	0	0	0	0	0	0	0	0	0	0	0	0	0	0	0	0	0	0	0	0	0	0	0	0	0	0	0	0	0	0	0	0	0
1769	0	0	0	0	0	0	0.0674308833445718	0	0	0.314677455608002	0	0	0	0.0224769611148573	0	0	0.0224769611148573	0	0	0	0	0	0	0	0	0	0	0	0	0	0	0	0	0	0	0	0	0	0	0	0	0	0	0	0	0	0	0	0
1770	0	0	0	0	0	0	0	0	0	-0.0021421074052653	0	-0.0021421074052653	0	0	0	0	-0.0021421074052653	0	0	0	0	0	0	-0.0021421074052653	0	0	0	0	0	0	0	0	0	-0.0021421074052653	0	-0.0042842148105306	0	0	0	0	-0.0021421074052653	-0.0064263222157959	0	0.00353219596623221	0	0	-0.0021421074052653	0	0
1771	0	0	0	0	0	0	0	0	0	0	0	0	0	0	0	0	-0.0124626121635095	0	0	0	0	0	0	0	0	0	0	0	0	0	0	0	0	0	0	0	0	0	0	0	0	0	0	0	0	0	0	0	0
1772	0	0	0	0	0	-0.0343760742523204	-0.011547092088413	-0.0802108399220809	-0.091669531339521	0	0.0056851453732337	-0.0229173828348803	-0.0343760742523204	-0.0572934570872006	0	-0.0114586914174401	0	-0.0229173828348803	-0.0114586914174401	-0.0343760742523204	-0.0114586914174401	0	-0.0229173828348803	0	0	-0.0572934570872006	0	0	0	0	0	0	0.0171438367906738	0	0	0	0	0	0	0	0	0	0	0	0	0	0	0	0
1773	0	0	0	0	0	0	0.0134553283100108	0	0	0	0	0	0	0	0	0	0	0	0	0	0	0	0	0	0	0	0	0	0	-0.0123839009287926	0	0	0	0	0	0	0	0	0	0	0	0	0	0	0	0	0	0	0
1774	0	0	0	-0.00452652543907297	0	0	0	0	0	0	0	0	0	0	0	0	0	0	0	0	0	0	0	0	0	0	0	0	0	0	0	0	0	0	0	-0.00452652543907297	0	-0.00905305087814593	0	0	0	0.0233089366463102	0	0.0234441985364992	0	0	0	0	-0.0135795763172189
1775	0	0	0	0	0	0.0441111601235112	0	0	0	0	0	0	0	0	0	0	0	0	0	0	0	0	0	0	0	0	0	0	0	0	0.0441111601235112	0	0	0	0	0	0	0	0	0	0	0	0	0	0	0	0	0	0
1776	0	0	0	0	0	0	0	0	0	0	0	0	0	0	0	0	0	0	0	0	0	0	0	0	0	0	0	0	0	0	0	0	0	0	0	0	0	0	0	0	0	0	0	0	0	0	0	-0.00530517624438498	0
1777	0	0	0	0	0	0	0	0	0	0	0	0	0	0	0	0	0	0	0	0	0	0	0	0	0	0	0	0	0	0	0	0	0	0	0	0	0	0	0	0	0	0	0	0	0	0	0	0	0
1778	0	0	-0.0209424083769634	0	-0.0418848167539267	-0.0649564229476677	-0.0209424083769634	0	0	0.0606980273141123	0.0282198158402784	0	0	0	-0.12565445026178	-0.0209424083769634	0.0606980273141123	-0.0209424083769634	0	0.0606980273141123	0.070104632594205	0.0303490136570561	0	0	0	0	0	0	0.121396054628225	0	0	0	0	0	-0.0764922260445386	0	0.0606980273141123	-0.0418848167539267	0.0303490136570561	-0.00212919781677769	0	0	0	0	0	0	0	0.047033026400464	-0.0209424083769634
1779	0	0	0	0	0	0	0	0	0	0	0	0	0	0	0	0	0	0	0	0	0	0	0	0	0	0	0	0	0	0	0	0	0	0	0	0	0	0	0	0	0	0	0	0	0	0	0	0	0
1780	0	0	0	0	0	0	0	0	0	0	0	0	0	0	0	0	0	0	0	0	0	0	0	0	0	0	0	0	0	0	0	0	0	0	0	0	0	0	0	0	0	0	0	0	0	0	0	0	0
1781	0	0	0	0	0	0	0	0	0	0	0	0	0	0	0	0	0	0	0	0	0	0	0	0	0	0	0	0	0	0	0	0	0	0	0	0	0	0	0	0	0	0	0	0	0	0	0	0	0
1782	0	0	0	0	0	0	0	0	0	0	0	0	0	0	0	0	0	0	0	0	0	0	0	0	0	0	0	0	0	0	0	0	0	0	0	0	0	0	0	0	0	0	0	0	0	0	0	0	0
1783	0	0	0	0	0	0	0	0	0	0	0	0	0	0	0	0	0	0	0	0	0	0	0	0	0	0	0	0	0	0	0	0	0	0	0	0	0	0	0	0	0	0	0	0	0	0	0	0	0
1784	0	0	0	0	0	0	0	0	0	0	0	0	0	0	0	0	0	0	0	0	0	0	0	0	0	0	0	0	0	0	0	0	0	0	0	0	0	0	0	0	0	0	0	0	0	0	0	0	0
1785	0	-0.267141585040071	-0.178094390026714	0	0	0	0	0	0	0	-0.0890471950133571	0	0	0	0	0	0	0	0	0	0	0	0	0	0	0	0	0	0	0	0	0	0	0	0	0	0	0	0	0	0	0	0	0	0	0	0	0	0
1786	0	0	0	0	0	0	0	0	0	0	0	0	0	0	0	0	0	0	0	0	0	0	0	0	0	0	0	0	0	0	0	0	0	0	0	0	0	-0.178306092124814	0	0	0	0	0	0	-0.0297176820208024	0	0	-0.0594353640416048	0
1787	0	0	0	0	0	0	0	0	0	0	0	0	0	0	0	0	0	0	0	0	0	0	0	0	0	0	0	0	0	0	0	0	0	0	0	0	0	0	0	0	0	0	0	0	0	0	0	0	0
1788	0	0	0	0	0	0	0	0	0	0	0	0	0	0	0	0	0	0	0	0	0	0	0	0	0	0	0	0	0	0	0	0	0	0	0	0	0	0	0	0	0	0	0	0	0	0	0	0	0
1789	0	0	0	0	0	0	-0.0089814981138854	0	0	0	0	0	0	0	0	0	0	0	0	0	-0.0089814981138854	0	0	0	0	0	0	0	0.0020971843138541	0	0	0	0	0	0	0	0	0	0	0	0	0	0	-0.0089814981138854	0	0	0	0	0
1790	0	0	0	0	0	0	0	0	0	0	0	0	0	0	0	0	0	0	0	0	0	0	0	0	0	0	0	0	0	0	0	0	0	0	0	0	0	0	0	0	0	0	0	0	0	0	0	0	0
1791	0	0	0	0	0	0	0	0	0	0	0	0	0	0	0	0	0	0.00650279620236702	0	0	-0.00496130184560429	0	0	0	0	0	0	0	0	0	0	0	0	0	0	0	0	0	0	0	0	0	0	0	0	0	0	0	0
1792	0	0	0	0	0	0	0	0	0	0	0	0	0	0	0	0	0	0	0	0	0	0	0	0	0	0	0	0	0.0533049040511727	0	0	0	0	0	0	0	0	0	0	0	0	0	0	0	0	0	0	-0.0720980533525595	0
1793	0	0	0	0	0	0	0	0.012923235978289	0	0	0	0	0	-0.0144029014721824	0	0	0	0	0	0	0	0	0	0	0	0	0	0	0	0	0	0	0	0	0	0	0	0	0	0	0	0	0	0	0	0	0	0	0
1794	0	0	0	0	0	0	0	0	0	0	0	0	0.0137381508448963	0	0	0	0	0	0	0	0	0.142364076925681	-0.0043777911840892	0	0	0	0	0	0	0	0.0137381508448963	0	0	0	0	0	0	0	0	0	0	0	0	0	0.0137381508448963	0	0	0	0
1795	0	0	0	0	0	0	0	0.0299850074962519	0	0	0	0	0	0	0	0	0	0	0	0	0	0	0	0	0	0	0	0	0	0	0	0	0	0	0	0	0	0	0	0	0	0	0	0	0	0	0	0	0
1796	0	0	-0.0133689839572193	0	0	0	0	0	0	0	0	0	0	0	0	0	0	0	0	0	0	0	0	0	0	0	0	0	0	0	0	0	0	0	0	-0.0133689839572193	0	0	0	0	0	0	0	0	0	0	0	0	0
1797	0	0	0	0	0	0	0	0	0	0	0	0	0	0	0	0	0	0	0	0	0	0	0	0	0	0	0	0	0	0	0	0	0	0	0	0	0	0	0	0	0	0	0	0	0	0	0	0	0
1798	0	0.269742479107692	0	0	0	0	0	0	0	0	0	0	0	-0.0505816894284269	0	0	0	0	0	0	0	0	0	0	0	-0.123648551576808	0.2360346184107	0	0.185452928982273	0	0	-0.151745068285281	0	0	0	0.0786782061369001	0	0	0	-0.0224851727199539	0	0	0	-0.0505816894284269	-0.151745068285281	0	0	0	0
1799	0	0	0	0	0	0	0	0	0	0	0	0	0	0	0	0	0	0	0	0	0	0	0	0	0	0	0	0	0	0	0	0	0.0166110210246605	0	0	0	0	0	0	-0.0162232316677482	0	0	0	0	0	0	0	0	0
1800	0.0326957658983162	0	0	0	0	0	0	0	0	0	0	0	0	0	0	0	0	0	0	0	0	0	0	0	0	0	0	0	0	0	0	0	0	0	0	0	0	0	0	0	0	0	0	0	0	0	0	0	0
1801	-0.0978792822185971	0.16260162601626	-0.065252854812398	-0.032626427406199	0	0	0	0	0.0542005420054201	0	0.0542005420054201	-0.032626427406199	0	0	0	0	0	0	0	0	0.10840108401084	0	0	0	0	0	0	0	0	0	0	0	-0.065252854812398	0	0	0	0	-0.032626427406199	0	0	0	-0.032626427406199	0	0	0	0	0	0	0
1802	0	0	0	0	0	0	0	0	0	0	0	0	0	0	0	0	0	0	0	0	0	0	0	0	0	0	0	0	0	0	0	0	0	0	0	0	0	0	0	0	0	0	0	0	0	0	0	0	0
1803	0	0	0	0	0	0	0	0	0	0	0	0	0	0	0	0	0.0172681747539285	0	0	0	0.0172681747539285	-0.0642880102860817	0	0	0	0	0	0	0.0518045242617855	0	0.0518045242617855	0.0172681747539285	0.0184643469363366	0	0	0	0.069072699015714	0	0.034536349507857	0	0	0	0	0	0	0	0	0	0
1804	0	0	0	0	0	-0.087260034904014	0	0	0	0	0	0	0	0	0	0	0	0	0	0	0	0	0	0	0	0	0	0	0	0	0	0	0	0	0	0	0	0	0	0	0	0	0	0	0	0	0	0	0
1805	0	0	0	0	-0.0883782589482987	0	0	0	0.133155792276964	-0.0441891294741494	-0.0883782589482987	0	0	0	-0.0218003628098167	0	0	-0.0883782589482987	0	0	-1.21314164704831	0	0	-0.0441891294741494	-0.0218003628098167	0	-0.904994548438284	-0.132567388422448	0	0.133155792276964	0	0	0	0	-0.0441891294741494	-0.286346735800197	-0.441891294741494	0	0	0	0	0	-1.32449707651545	0	-0.132567388422448	0	0.199733688415446	0.0695199154110621	-0.0441891294741494
1806	0	0	0	0	0	0	0	0	0	0	0	0	0	0	0	0	0	0	0	0	0	0	0	0	0	0	0	0	0	0	0	0	0	0	0	0	0	0	0	0	0	0	0	0	0	0	0	0	0
1807	-0.0353232347927432	0.0472217849834724	0.0144599133932369	0	0	-0.0170212765957447	0	0	0	0	0	0	0	0	0	0	0	-0.0170212765957447	0.0157405949944908	0	0.0314811899889816	-0.0170212765957447	0.0157405949944908	0	0	0	0	0	0	0	0	0	0	0	0.0472217849834724	0	0.0157405949944908	0	0	0	0	0	0	0	0.0157405949944908	0	-0.0038420448037616	0	0.0157405949944908
1808	0	0	0	0	0	0	0	0	0	0	0	-0.0250501002004008	0	0	0	-0.0250501002004008	0	0	0	0	0	0	0	0	0	0	0	0	-0.0250501002004008	0	0	0	0	0	0	0	-0.100200400801603	0	-0.0501002004008016	-0.0250501002004008	0	-0.0250501002004008	0	0	0	-0.0028673140424594	0	-0.0250501002004008	0
1809	0	-0.0452079566003617	0	0	0	0	0	0	0	0	0	0	0	0	0	0	0	0	0	0	0	0.0637348629700446	0	0	0	0	0	0	0	0	0	0	0	0	0	0	0	-0.0904159132007233	0	0	0	0	0	0	0	0	0	0	0
1810	0	0	0	0	0	0	0	0	0	0	0	0	0	0	0	0	0	0	0	0	0	0	0	0	0	0	0	0	0	0	0	0	0	0	0	0	0	0	0	0	0	0	0	0	0	0	0	0	0
1811	-0.00371650499869922	0	0	0	0	0	0	0	0	0	0	0	0	0	0	0	0	0	0	0	0	0	0	0	0	0	0	0	0	0	0	0	0	0	0	0	0	0	0	0	0	0	0	0	0	0	0	0	0
1812	0	0	0	0	0	0	0	0	0	0	0	0	0	0	0	0	0	0	0	-0.0100664384940608	0	0	0	0.0129687449913554	0	0	0	0.011033873993159	0	0	0.022067747986318	0	0.011033873993159	0	0.000967435499098201	0	0	0	0	-0.0090990029949626	0	0	0	0.0197407934850428	0	0	0	0	0
1813	0	0	0	0	0	0	-0.0679809653297077	0	0	0	0	0	0	0	0	0	0	0	0	0	0	0	0	0	0	0	0	0.058343057176196	0	0	0	-0.135961930659415	0	-0.747790618626785	-0.135961930659415	0	0	0	0	0	0	-0.407885791978246	0	0	0	0	0	0	-0.0679809653297077
1814	0	-0.0291403593977659	0.0145666423889294	0	-0.0194339808850845	0	0	0	0	0	-0.0194269062651773	0	0	0.0631197588120582	0	0	0.0145666423889294	0	0	-0.0194269062651773	0	0	0	0.0436999271667881	0.0145666423889294	-0.00971345313258863	0	0	0	0	0	-0.0048602638762479	0.0728332119446468	-0.00971345313258863	0	0	0	0	0	0	0.0145666423889294	0.0582665695557174	0	0	0	0	0.0291332847778587	0.0582665695557174	0
1815	0	0	0	0	0	0	0	0	0	0	0	0	0	0	0	0	0	0	0	0	0	0	0	0	0	0	0	0	0	0	0	0	0	0	0	0	0	0	0	0	0	0	0	0	0	0	0	0	0
1816	0	0	0	0	0	0	0	0	0	0	0	0	0	0	0	-0.00466657333519996	0	0	0	0	0	0	0	0	0	0	0	0	-0.0466657333519996	0	-0.00933314667039993	0	0	0	0	-0.0139997200055999	0	0	0	-0.0196563730998032	0	0	0	-0.00466657333519996	0	0	0	0	0
1817	0	0	0	0	0	0	0	0	0	0	0	0	0	0	0	0	0.0199351764212808	0	0	0	-0.0168833361472227	0	0	0	0	0.0398703528425616	0	0	6.39030440405943	0.105065709905958	0.0283768444948922	0.266885108801699	0	0	0.598965574666794	0	0	0.0851305334846765	0.246949932380419	0	0	0	0	0.68409610815147	0	0	0.0283768444948922	0	0
1818	0	0	0	0	0	0	0	0	0	0	0	0	0	0	0	0	0	0	0	0	0	0	0	0	0	0	0	0	0	0	0	0	0	0	0	0	0	0	0	0	0	0	0	0	0	0	0	0	0
1819	0	0	0	0	0	0	0	0	0	0	0	0	0	0	0	0	0	0	0	0	0	0	0	0	0	0	0	0	0	0	0	0	0	0	0	0	0	0	0	0	0	0	0	0	0	0	0	0	0
1820	0	0	0	0	0	0	0.0959692898272553	0	0	0	0	0.0959692898272553	0	-0.0465766185374942	0	0	0	0	0	0	0	0	0	0	0	0	0	0	0	0	0	0	0	0	0	0	0	0	0	0	0	0	0	0	0	0	0	0	0
1821	0	0	0	0	0	0	0	0	0	0	0	0	0	0	0	0	0	0	0	0	0	0	0	0	0	0	0	0	0	0	0	0	0	0	0	0	0	0	0	0	0	0	0	0	0	0	0	0	0
1822	-0.00659297189196317	0	0	-0.140729366799811	0.0180711978744512	-0.014483021860746	0.0547035331192366	0.107857947979561	0.157265587283653	-0.057773487900455	-0.41154834472569	-4.8028793735855	-11.3431141449392	-0.149650313795018	-0.0368702345585752	-0.0615344043249896	0.044046586585987	-0.95943323710389	-0.0034154356028767	-0.00879062918928422	-0.00439531459464211	0.025154109262297	0.58351461233317	0.01913037663748	0	-0.00659297189196317	0.742122750289751	0.0208380944389183	0.112981101383876	0.00602373262481703	0.0641427013469299	0.0316677813829966	0.058688207989259	0	-0.00659297189196317	0.0394785315805156	1.62529206646436	0.0564905506919379	0.0120474652496341	0.207811705122038	0.139273689180465	0	-0.00219765729732106	-0.0011384785342923	0.01913037663748	-0.00659297189196317	0.007652150654992	-0.00219765729732106	0.0240949304992682
1823	0	0	0	0	-0.0313344369746356	0	-0.0192678227360308	0	0	0	0	0.0264690312334569	0	-0.0192678227360308	0	0	0	0	-0.0192678227360308	0	0	0	0	0	0	0	0	0	0	0	0	-0.0192678227360308	0	0	0	0	0	0	0	0	0	0	0	0	0	0	0	0	0.0264690312334569
1824	0	0	0	0	0.0554170130229981	0	0	0	0	0	0	0	0	0	0	0	0	0	0	0	0	0	0	0	0	0	0	0	0	0	0	0	0	0	0	0	0	0	0	0	-0.0496894409937888	0	0	0.027708506511499	0	0	0	0	0
1825	0	0	0	0	0	0	0	0	0	0	0	0	0	0	0	0	0	0	0	0	0	0	0	0	0	0	0	0	0	0	0	0	0	0	0	0	0	0	0	0	0	0	0	0	0	0	0	0	0
1826	0	0	0	0	0	0	0	0	0	0	0	0	0	0	0	0	0	0	0	0	0	0	0	0	0	0	0	0	0	0	0	0	-0.0121094696052313	0	0	-0.0242189392104626	0	0	0	0	0	0	0	0	0	0	0	0	0
1827	0	0	0	0	0	0	0	0	0	0	0	0	0	0	0	0	0	0	0	0	0	0	0	0	0	0	0	0	0	-0.0157331655129012	0	0	0	0	0.0312695434646654	0	0	0	0	0	0	0	0	-0.0471994965387036	0	0	0	0	0
1828	0	0	0	0	0	0	0	0	0	0	0.0306466441924609	0	0	0	0	0	0	0	0	0	0	0	0	0	0	0	0	0	0	0	0	0	0	0	0	0	0	0	0	0	0	0	0	0	0	0	0	0	0
1829	0	0	-0.0334840113845639	0	0	-0.0167420056922819	0	0	0	0	-0.0334840113845639	0	0	0.0281928390188892	-0.0167420056922819	0.0281928390188892	0	0	0.0281928390188892	-0.0334840113845639	0	0	-0.0334840113845639	0	-0.0334840113845639	0	0	-0.0167420056922819	0	0	0	0	0	0	0	-0.0334840113845639	0	0	0	0	0	0	0	-0.0334840113845639	0	0	0	0	0
1830	0	0	0	0	0	0	0	0	0	0	0	0	0	0	0	0	0	0	0	0	0	0	0	0	0	0	0	0	0	0	0	0	0	0	0	0	0	0	0	0	0	0	0	0	0	0	0	0	0
1831	0	0	0	0	0	0	0.132201160506972	0	0	0	0	0	0	0	0	0	0	0	0	0	0	0	0	0	0	0	0	0	0	0	0	0	0	0	0	0	0	0	0	0	0	0	0	0	0	0	0	0	0
1832	0	0	0	0	0	0	-0.0213401621852326	0	0	0	0	0	0	0	0	0	0	0	0	0	0	0	0.0733541169998166	0.0550155877498625	0	0	0	0	0	0	0	0	0	0	0	0	0	0	0	0	0	0	0	0	0	0	0	0	0
1833	0	0	0	0	0	0	0	0	0	0	0	0	0	0	0	0	0	0	0	0	0	0	0	0	0	0	0	0	0	0	0	0	0	0	0	0	0	0	0	0	0	0	0	0	0	0	0	0	0
1834	0	0	0	0	0	0	0	0	0	0	0	0	0	0	0	0	0	0	0	0	0	0	0	0	0	0	0	0	0	0	0	0	0	0	0	0	0	0	0	0	0	0	0	0	0	0	0	0	0
1835	-0.0105462982493145	0.0060813165448493	0	0	-0.0075056399768899	0	-0.0105462982493145	-0.021092596498629	0.0271739130434783	0	0	0.0135869565217391	0	0	0	0	0.0271739130434783	0	0	0	0.0135869565217391	0	0	0	0	0	0	0	0	0	0	-0.0105462982493145	0	0	0	0.0135869565217391	0	-0.0105462982493145	0	0.0271739130434783	0	0	0.0030406582724246	0	0.0135869565217391	0	0	0	0
1836	0	0	0	0	0	0	-0.0421052631578947	0	0	-0.126315789473684	-0.0421052631578947	0	0	0	0	0	-0.0421052631578947	0	0	0	0	-0.0842105263157895	-0.0421052631578947	0	0	-0.0842105263157895	0	0	0	0	0.113222839923104	-0.210526315789474	-0.0421052631578947	-0.126315789473684	0	-0.0842105263157895	0	0	-0.252631578947368	0	0	0	0	0	0	0	0	-0.0842105263157895	-0.364441211617395
1837	0	0	0	0	0	0	0	0	0	0	0	0	0	0	0	0	0	0	0	0	0	0	0	0	0	0	0	0	0	0	0	0	0	0	0	0	0	0	0	0	0	0	0	0	0	0	0	0	0
1838	0	0	0.0164419598816179	0	0	-0.00797130330809087	0	0	0	0	0	0	0	0	0	0	0	0	0	0	0	0	0	0	0	0	0	0	0	0	0	0	0	0	0	0	0	0	0	0	0	0	0	0	0	0	0	0	0
1839	0	0	0	0	0	0	0	0.152671755725191	0	0	0	0	0	0	0	0	0	0	0	0	0	0	-0.0285469597487868	0	0	0	0	0	0	0	0	0	0	0	0	0	0	0	0	0	0	0	0	0	0	0	0	0	0
1840	0	0	0	0	0	0	0	0	0	0	0	0	0	0	0	0	0	0	0	0	0	0	0	0	0	0	0	0	0	0	0	0	0	0	0	0	0	0	0	0	0	0	0	0	0	0	0	0.145419292292778	0
1841	0	0	0	0	0	0	0	0	0	0	0	0	0	0	0	0	0	0	0	0	0	0	0	0	0	0	0	0	0	0	0	0	0	0	0	0	0	0	0	0	0	0	0	0	0	0	0	0	0
1842	0	0	0	0	0	0.034579240262378	0	0	0	0	0	0	0	0	0	0.216760450913971	-0.0125580811252041	-0.0376742433756122	0	0.0198984675042622	0.164891590520404	-0.226045460253673	0.0073403863790581	0	0	1.62185511999298	0	0	0	0	0	-0.0376742433756122	0	0	-0.0125580811252041	-0.0428919381217582	0	0	0	0	0	0.0225073148773351	0	0	0	0	0	0	-0.0125580811252041
1843	0	0	0	0	0	0	0	0	0	0	0	0	0	0	0	0	0	0	0	0	0	0	0	0	0	0	0	0	0	0	0	0	0	0	0	0	0	0	0	0	0	0	0	0	0	0	0	0	0
1844	0	0	0.0128667009778693	0	0	0	-0.00954653937947494	0	0	0.0128667009778693	0	0	0	0	0	0	0	0	0	0	0	0	0	0	0	0	0	0	0	0	0	0	0	0	0	0	0	0	0	0.0128667009778693	0	0	0	0	0	-0.0190930787589499	0	0	0
1845	0	0	-0.0140904607580668	0	0	0	0	0.0828067915844616	0	0	0	0	0	0	0	0	0.0968972523425284	0	0	0	0	0	0	0.0067559015517101	0	0	0	0	0.0208463623097769	0	0	0	0	0	0	0	0	0	0	0	0	0	0	0	-0.0281809215161336	0	0	0	0
1846	0	0	0.117233294255569	0	0	0	0	0	0	0	0	0	0	0	0	0	0	0	0	0	0	0	0	0	0	0	0	0	0	0	0	0	0	0	0	0	0	0	0	0	0	0	0	0	0	0	0	0	0
1847	0	0	0	0	0	0.113088835423184	0	0.0161030595813204	0	0	0	0	0	0	0	0	0.0161030595813204	0	0	0	0	0	0	0	0.0161030595813204	0	0	-0.0153682228734396	0	0	0	0	0.0161030595813204	0	0	0	0	0	0	0	0	0	0	0	0	0	0	0	0
1848	0	0	0	0	0	0	0	0	0	0	0	0	0	0	0	0	0	0	0	0	0	0	0	0	0	0	0	0	0	0	0	0	0	0	0	0	0	0	0	0	0	0	0	0	0	0	0	0	0
1849	0	0	0	0	0	0	0	0	0	0	0	0	0	0	0	0	0	0	0	0	0	0	0	0	0	0	0	0	0	0	0	0	0	0	0	0	0	0	0	0	0	0	0	0	0	0	0	0	0
1850	-0.0140904607580668	0	0	0	0	0	0	0	0	0	0	0	0	0	-0.00469682025268893	0	0	0	0	0	-0.00469682025268893	0	0.00787006255892944	-0.0101554294786021	0	0	-0.00469682025268893	0	0	0	-0.00469682025268893	0	0.00787006255892944	0	0.00393503127946472	0	0	0	0	0	0	0.0384624374080793	0	0	0	-0.0281809215161336	0	0	0
1851	0	0	0	0	0	0	0	0	0	0	0	0	0	0	0	0	0	0	0	0	0	0	0	0	0	0	0	0	0	0	0	0	0	0	0	0	0	0	0	0	0	0	0	0	0	0	0	0	0
1852	0	0	0	0	-0.0694444444444444	0	0	-0.347222222222222	-0.0694444444444444	-0.138888888888889	0	0	-0.208333333333333	-0.138888888888889	0	-0.0694444444444444	0	0	-0.138888888888889	0	0	0	0	0	0	0	0	0	0	0	0	0	0	0	0	0	0	0	0	0	0	0	0	-0.0694444444444444	0	0	0	0	0
1853	0	0	0	0	0	0	0	0	0	0	0	0	0	0	0	0	0	0	0	0	0	0	0	0	0	0	0	0	0	0	0	0	0	0	0	0	0	0	0	0	0	0	0	0	0	0	0	0	0
1854	0	-0.0621740455460919	0	0.0273074822501365	0	0	0.0188821726200076	0	0	0	0	0	0	0	-0.00842530963012891	-0.014819065900508	0	0.0273074822501365	0	0.0156852944848181	0.0136537411250683	-0.0168506192602578	0	0.00463023911268101	0.0020315533597498	0	-1.47971973674566	-0.0337012385205156	0.192884832919575	-0.0906468525716685	-0.165608410658518	-0.418965891944645	-0.0232443755306369	-0.053748735915963	0	-0.0116221877653184	0	-0.252759288903867	-0.0244097003060767	-0.0095906344055686	-4.8763078498624	0.017417751653438	0.168774228804629	0	0.00576450389904104	0.0188821726200076	0.617584168774183	0.0377643452400153	-0.0166757630254499
1855	-0.0234852043212776	0	0	0	0	0	0	0	0	0	-0.0117426021606388	0	0	0.0512382578992314	0.0170794192997438	0.01067363427821	0	-0.0352278064819164	0	0	0	0	0	0	0	0	0	0	0	-0.0117426021606388	0	0	0	0	0	0	0	0	0	0	0	0.005336817139105	-0.0352278064819164	0	0	-0.0117426021606388	0	0	0
1856	0	0	0	0	0	0	0	0	0	0	0	0	0	0	0	0	0	0	0	0	0	0	0	0	0	0	0	0	0	0	0	0	0	0	0	0	0	0	0	0	0	0	0	0	0	0	0	0	0
1857	-0.0143647202470732	0	0	0	0	0	-0.026982032664448	0	0	0.0137608366588689	-0.042554520087931	0	0	0	-0.0089940108881496	0	0	0.0137608366588689	0	-0.0143647202470732	0	0	0	0	0	0	0	0	0	0	0	0	0	0	0	0	0	0	0	0	0	0	0	0	0	-0.0143647202470732	0	0	0
1858	-0.0152578577967653	0	0	0	0	0	0	0	0.0303674460977832	-0.0305157155935307	0	0	0	0	0	0	0	-0.0305157155935307	0	0	0	0	0.0303674460977832	0	-0.0152578577967653	0	-0.0305157155935307	0	0	0	-0.0305157155935307	0	0	0	-0.0152578577967653	0	0	0	0.0303674460977832	0	0	0	0	0	0	0	0	0	0
1859	0	0	0	0	0	0	0	0	0	0	0	0	0	0	0	0	0	0	0	0	0	0	0	0	0	0	0	0	0	0	0	0	0	0	0	0	0	0	0	0	0	0	0	0	0	0	0	0	0
1860	0	0	0	0	0	0	0	0	0	0	0	0	0	0	0	0	0	0	0	-0.0312891113892365	-0.0156445556946183	0	0	0	0	0	0	0	0	0	0	0	0	0	0	0	0	0	0	0	0	0	0	0	0	0	0	0	0
1861	0.0522193211488251	0	0	0	0	0	0	0	0	0	0	0	0.000416450896817994	0.0522193211488251	0	-0.0346740638002774	0	-0.13869625520111	0	0.0522193211488251	0	0	0	0	0	0	0	0	0	0	0	0	0	0	0	0	0	0	0	0	-0.0346740638002774	0	-0.0346740638002774	0	0	0	0.10443864229765	0	0
1862	0	0	0	0	0	0	0	0	0	0	0	0	0	0	0	0	0	0	0	0	0	0	0	0	0	0	0	0	0	0	0	0	0	0	0	0	0	0	0	0	0	0	0	0	0	0	0	0	0
1863	-0.680933852140078	0	-0.081430357237178	0	-0.0972762645914397	0	0	-0.389105058365759	0	0	-2.06304910470624	0.226244343891403	0	0	-0.0972762645914397	0	0	0.128968079299963	0	0	0	0	0	0	0	0	0	0	0	0	0	0	0	0	0	0	0	-0.0972762645914397	0	0	0	0	0	-2.04280155642023	0	0	-0.162860714474356	0	-0.081430357237178
1864	0.00826856292376385	0	0	0	0	0	0	0	0	0	0	0	0	0	0	0	0	0	0	0	0	0	0	0	0	0	0	0	0	0	0	0	0	0	0	0	0	0	0	0	0	0	0	0	0	0	0	0	0
1865	0	0	0	0	0	-0.0204692749389114	0	0	0.0334616028107746	0.11302175484993	0	0	0	0	0	0	0.0334616028107746	0	0	-0.0040938549877822	0	0	0	-0.041649312786339	0	-0.528093356896285	-0.0208246563931695	-0.223911220974307	-0.041649312786339	0	0.0334616028107746	-0.478967097042899	0.008543091429823	-0.0208246563931695	-0.145772594752187	-0.0208246563931695	0	0	0	0	-0.0873924805604607	-0.0208246563931695	0	0	0	-0.0081877099755644	0	0	-0.58682885254227
1866	0	0	0	0	0	0	0	0	0	0	0	0	0	0	0	0	0	0	0	0	0	0	0	0	0	0	0	0	0	0	0	0	0	0	0	0	0	0	0	0	0	0	0	0	0	0	0	0	0
1867	0	0	0	0	0	0	0	0	0	0	0	0	0	0	0	0	0	0	0	0	0	0	0	0	0	0	0	0	0	0	0	0	0	0	0	0	0	0	0	0	0	0	0	0	0	0	0	0	0
1868	0	0	0	0	0	0	0	0	0	0	0	0	0	0	0	0	0	0	0	0	0	0	0	0	0	0	0	0	0	0	0	0	0	0	0	0	0	0	0	0	0	0	0	0	0	0	0	0	0
1869	0	0	0	0	0	0	0	0	0	0	0	0	0	0	0	0	0	0	0	0	0	0	0	0	0	0	0	0	0	0	0	0	0	0	0	0	0	0	0	0	0	0	0	0	0	0	0	0	0
1870	0	0	-0.00652954619653934	0	0	0	0	0	0	0	0	0	0	0	0	0	-0.00652954619653934	0	0.0619578686493185	0	0	0	0	0	0	0	0	0	0	0	0	0	0	0	0	0	0	0	0.0309789343246592	0	0	0	0	0	-0.0130590923930787	0	0	0	0
1871	0	0	0	0	0	0	0	0	0	0	0	0	0	-0.0206440957886045	0	0	0	0	0	0	0	0	0	0	0	0	0	0	0	0	0.0636132315521628	0	0.190839694656489	0	0	0	0	0	0	0	-0.0206440957886045	0	0	0	0	0	0	0	0
1872	0	0	0	0	0	0	0	0	0	0	0	0	0	0	0	0	0	0	0	0	0	0	0	0	0	0	0	0	0	0	0	0	0	0	0	-0.117096018735363	0	0	0	0	0	0	0	0	0	0	0	-0.0585480093676815	0
1873	0	0	0	0	0	0	0	0	0	0	0	0	0	0	0	0	0	0	0	0	0	0	0	0	0	0	0	0	0	0	0	0	0	0	0	0	0	0	0	0	0	0	0	0	0.01669727834363	0	0	0	0
1874	0	0	0	0	0	0	0	0	0	0	0	0	0	0	0	0	0	0	0	0	0	0	0	0	0	0	0	0	0	0	0	0	0	0	0	0	0	0	0	0	0	0	0	0	0	0	0	0	0
1875	0	0	0	0	0	0	0	0	0	0	0	0	0	0	0	0	0	0	0	0	0	0	0	0	0	0	0	0	0	0	0	0	0	0	0	0	0	0	0	0	0	0	0	0	0	0	0	0	0
1876	0	0	0	0	0	0	0	0	0	0	0	0	0	0	0	0	0	0	0	0	0	0	0	0	0	0	0	0	0	0	0	0	0	0	0	0	0	0	0	0	0	0	0	0	0	0	0	0	0
1877	0	0	0	0	0	0	0	0	0	0	0	0	0	0	0	0	0	0.00968804495252858	0	0	0	0	0	0	0	0	0	0	0	0	0	0	0	0	0	0	0	0	0	0	0	0	0	0	0	0	0	0	0
1878	0	0	0	0	0	0	0	0	0	0	0	0	0	0	0	0	0	0	0	0	0	0	0	0	0	0	0	0	0	0	0.0167672702883971	0	0	0	0	0	0	0	0	0	-0.00826787928896238	0	0	0	0	0	0	0	0
[truncated: 2,514 more rows]
[truncated: 352 more columns]
