# Supplementary material for: Ssl2/TFIIH function in transcription start site scanning by RNA polymerase II in Saccharomyces cerevisiae
Source: eLife. 2021 Oct 15;10:e71013. doi: 10.7554/eLife.71013 (PMC8589449; doi:10.7554/eLife.71013)
Supplement: Figure 4—source data 1. [file elife-71013-fig4-data1.csv]

	V1	V2	V3	V4	V5	V6	V7	V8	V9	V10	V11	V12	V13	V14	V15	V16	V17	V18	V19	V20	V21	V22	V23	V24	V25	V26	V27	V28	V29	V30	V31	V32	V33	V34	V35	V36	V37	V38	V39	V40	V41	V42	V43	V44	V45	V46	V47	V48	V49
1	0	0	0	0	0	0	0	0	0	0	0	0	-6.05746352195467e-05	0.000201960633833253	0	0	0.000201960633833253	0	0	0	0	0	0	0	0.000403921267666506	0	-6.05746352195467e-05	0	0	0	0	0	0	0	0	-0.000121149270439093	0	0	0.000343346632446959	0	0	0.000201960633833253	0	0	-0.000121149270439093	0	0	0	0
2	0	0	0	0	0	0	0	0	0	0	0	0	0	0	0	0	0	0	0	0	0.000645690339826826	0	0	0	0	0	0	0	-0.000415498078321388	0	0	0.000645690339826826	0	0	0	0	0	0	0	0	0	0	0	0	0.000645690339826826	0	0	0	0
3	0	0	0	0	0	0	0	0	0	0	0	0	0	0	0	-0.0125504633212709	0	0	0.00709144417260575	0	-0.00209174388687849	0	0	0	0	0	0	0	0	0	-0.0194634606693605	0	-0.00836697554751396	-0.00418348777375698	0	0.00354572208630288	0	0	0	0	0	0	0	0	0	-0.00418348777375698	-0.0146422072081494	0	0
4	0	0	0	0	0	0	0	0	0	0	0	0	0	0	0	0	0	0	0	0	0	0	0	0	0	0	0	0	0	0	0	0	0	0	0	0	0	0	0	0	0	0	0	0	0	0	0	0	0
5	0	0	0	0	0	0	0	0	0	0	0	0	0	0	0	0	0	0	0	0	0	0	-0.0202101859337106	0	-0.0067367286445702	0	0	0	0	0	0	0	0	0	0	0	0	0	0	0.0135116876097825	0	0	0	0	0	0	0	0	0
6	0	0	0	0	0	0	-0.00124500441976569	0	0	0	0	0	0	0.00205191340925413	0	0	0	0.00285882239874257	0	0	0	0.0102595670462706	0	0.00901456262650491	0.00205191340925413	-6.92818710660596e-05	0	0	0	0	0	0	-0.00124500441976569	0	0	0	0	0	0.00813837176595045	0	0	0	-0.00249000883953138	0	0	0	0	0	0
7	0	0	0	-0.00287505031338048	0	0	0	0	0	0	0	-0.00287505031338048	0	0	0	0	0	0	0	0	0	0	0	0	0	0	0	0	0	0	0	0	0	0	0	0	0	0	-0.00575010062676097	0	0	0	0	0	0	0	0	0	0
8	0	0	0	0.00159893965245915	0	0	0	0	0	0	0	0	0	0	0	0	0	0	0	0	0	0	0.0127893592531014	0	0	0.0127893592531014	-0.00106524044611552	0	0	0	-0.00532836019714933	0	0	0	0	-0.00372942054469018	-0.00266418009857466	0	-0.00266418009857466	0	0	0	0	0	0	0	-0.00266418009857466	0	0
9	0	0	0	0	0	0	0	0	0	0.000452327546632906	0	0	0	0.000148543306351724	0	-0.000627661363295568	-0.000155240933929459	0	-0.00049251331209931	0	0	0	0	0	0	0	-0.000155240933929459	0	0	0	0	0	0	0	0.000148543306351724	0	0	0	0	0	0	0	0	0.000303784240281183	0	0	0	0	0
10	0	0	0	0	0	0	0	0	0	0	0	-0.00883080183680678	0	0	0	0	0	0	0	0	0	0	0	0	0	0	0	0	0	0	0	0	0	0	0	0	0	0	0	0	-0.00883080183680678	0	0	0	0	0	0	0	0
11	-0.0038249694002448	0.0534047814925731	0.00763184003663283	0	-0.0076499388004896	-0.000561061679559022	0.0114387106730209	0	0	-0.0076499388004896	-0.187676883305989	-0.0038249694002448	-0.0307626440766692	-0.0229679151653256	-0.0038249694002448	0	0	-0.0115654020200182	0	0	0	0	0	0	0	0	0	0	-0.0229498164014688	-0.0038249694002448	0	0.152274825455521	0.0152636800732657	0	-0.0152998776009792	0	0.00380687063638803	0.0381049038915939	0.0648072946378804	0	-0.0114749082007344	0.0037706731086745	0.018889563071086	0.205534816837241	0.0190705507096537	-0.0114749082007344	0.0114387106730209	0.026449008052292	0.346425227911311
12	0	0	0	0	0	0	0	0	0	-0.0039941685139696	0	-0.00998542128492401	0	0	0	0	-0.0039941685139696	0	0	0	0	0	0	0	0	0	0	0	0	0	0.00394851141119798	0	0	0	0	0	0	0	0	0	0	0	0	0	0	0	-0.0039941685139696	0	0
13	0	0	0	0	0	0	0	0	0	0	0	0	0	0	0	0	0	0	0	0	0	-0.00341093203717916	0	0	0	0	-0.00411433171934668	0	0	0	0	0	0	-0.00682186407435832	0	0	-0.00170546601858958	0	0	0	0	0	0	0	0	0	0	0	0
14	0	0	-0.019005986885869	0	0	0	0	0	0	0	0	0	0	0.0657678395264716	0	0	0	0	0	-0.00950299344293452	0	0	0.0328839197632358	0	0	0	0	0	0	0	0	0	-0.00950299344293452	0	0	0	0	0	0	0	0	0	0	0	0	0	0	0	0
15	0	0	0	0	0	0	0	0	0	0	0	0	0	0	0	0	0	0	0	0	0	0	0	0	0	0	0	0	0	0	0	0	0	0	0	0	0	0	0	0	0	0	0	0	0	0	0	0	0
16	0	0	0	0	0	0	0	0	0	0	0	0	0	0	0	0	0	0	0	0	0	0	0	0	0	0	0	0	0	0	0	0	0	0	0	0	0	0	0	0	0	0	0	0	0	0	0	0	0
17	-0.00852805730854511	0	0	0	0	0	0	0	0	0	0	0	0	0	-0.0170561146170902	0	0	0	0	0	0	0	0	0	0	0	0	0	0	0	0	0	0	0	0	0	0	0	0	0	0	0	0	0	0	0	0	0	0
18	0	0	0	0	0	0	0	0	0	0	0	0	0	0	0	0	0	0	0	0	0	0	0	0	0	0	0	0	0	0	0	0	0	0	0.00352800056448009	0	0	-0.000620385880017371	0	0	0	0	0	0	0	0	-0.000620385880017371	0.00049084273626795	0
19	0	0	0	0	0	0	0	0	0	0	0	0	0	0	0	0	0	0	0	0	0	0	0	0	0	0	0	0	0	0	0	0	0	0	0	0	0	0	0	0	0	0	0	0	0	0	0	0	0
20	0	0	0	0	0	0	0	0	0	0	0	0	0	0	0	0	0	0	0	0	0	0	0	0	0	0	-0.0211999152003392	0	0	0	0	0	-0.0211999152003392	0	0	0.0214076689496395	0	0	0	0	0	0	0	0	0	0	0	0	0.0854229220492576
21	0	0	0	0	0	0	0	0	0	0	0	0	0	0	0	0	0	0	0	0	0	0	0	0	0	0	0	0	0	0	0	0	0	0	0	0	0	0	0	0	0	0	0	0	0	0	0	0	0
22	0	0	0	0	0.00357832963572604	0	0	0	0	-0.00304645849200305	0	-0.00609291698400609	0	0	0.00357832963572604	0	0.00768853041517505	0	0.00357832963572604	0	0	0	0	0	0	0	0	0	0	0	0	0	0	0	0	0	0	0	0	0	-0.00304645849200305	0	0	0	0	0.00053187114372299	0	0	0
23	0	0	0	0	0	0	0	0	0	0	0	0	0	0	0	0	0	0	0	0	0	0	0	0	0	0	0	0	0	0	0	0	0	0	0	0	0	0	0	0	0	0	0	0	0	0	0	0	0
24	0	0	0	-0.0152893944929665	0	0	0.00422618544501733	0.0702966112106984	0.00205778767413024	0.0891485305681412	-0.00650519331266127	0.00422618544501733	0	0.0137408531383706	-0.00433679554177418	0.00422618544501733	0	-0.00216839777088709	-0.16517386504194	0.00628397311914756	-0.0737255242101611	0.00422618544501733	0	0	-0.0130103866253225	-0.0281891710215322	-0.00216839777088709	0	0.00422618544501733	0	0.025357112670104	0	0	-0.000221220193513718	0	0	0.00400496525150363	-0.00216839777088709	0	0	-0.0182320629411516	0.00845237089003465	0	0.0017259573838597	0	-0.0221264180958983	-0.00216839777088709	0	0
25	0	0	0	0	0	0	0	0	0	0	0	0	0	0	0	-0.000570057176734827	0	0	0	0	0	0	0	0	0	0	0	0	0	0	0	0	0	0	0	0	0	0	0	0	0	0	-0.000285028588367413	0	0	0	0	0	0
26	0	0	0	0	0	-0.0663129973474801	0	0	0	-0.0331564986737401	0	0	0	0	0	0	-0.0331564986737401	0	0	0	-0.0331564986737401	0	0	0	0.0789265982636148	0	0	0.203623296117105	0	0	0	0	0	0	0.0789265982636148	0	0	0	0	0	0	0	0.0789265982636148	0	0	0	0	-0.0331564986737401	0
27	0	0	0	0	0	0	0	0	0	0	0	0	0	0	0	0	0	0	0	0	0	0	0	0	0	0	0	0	0	0	0	0	0	0	0	0	0	0	0	0	0	0	0	0	0	0	0	0	0
28	0	0	0	0	0	0	0	0	0	0	0	0	0.00259861753547113	-0.00141123341800734	0	-0.00141123341800734	0	0	0	0.00259861753547113	0	0.00519723507094226	0	0	0	0	0	0	0	0	0	0	0	0	0	0	0	0	0	0	0	0	0	0	0	0	0	0.00259861753547113	0
29	0	0	0	0	0	0.00029109860594683	0	0	0	0	-0.0038472636337405	0	-0.0115417909012215	0	0	0.00606199405655758	0	0	-0.00947260978137789	0	-0.00932706047840447	0	0	-0.00932706047840447	0	0	-0.00481503208622899	-0.0038472636337405	0	0	0.00206918111984366	-0.0034106157248203	0	0	0	0	0.0220332458034132	0	0	0	0	0	0	-0.00562534614763734	0	-0.00192363181687025	0	0	0
30	0	0	0	0	0	0	0	0	0	0	0	0	0	0	0	0.0254743920545024	0	0	0	-0.00810208628721896	0	0	0	0	0	0	0	0.0329924117452986	0	0	0	0.00824810293632464	0	0	0	0	0	0	0.00419705979271516	0	0	0	0	0	0	0	0	0	0
31	0	0	0	0	0	0	0	0	0	0	0	0	0	0	0	0	0	0	0	0	0	0	0	0	0	0	0	0	0	0	0	0	0	0	0	0	0	0	0	0	0	0	0	0	0	0	0	0	0
32	0	0	0	0	0	0	0	0	0	0	0	0	0	0	0	0	0	0	0	0	0	0	0	0	0	0	0	0	0	-0.00337001027853135	0	0	0	0	0	0	0	0	0	0	0	0	0	0	0	0	0	0	0
33	0	0	0	0	0	0	0	0	0	0	0	0	0	0	0	0	0	0	0	0	0	0	0	0	0	0	0	0	0	0	0	0	0	0	0	0	0	0	0	0	0	0	0	0	0	0	0	0	0
34	0	0	0	0	0	0	0	0	0	0	0	0	0	0	0	0	0	0	0	0	0	0	0	0	0	0	0	0	0	0	0	0	0	0	0	0	0	0	0	0	0	0	0	0	0	0	0	0	0
35	0	0	0	0	0	0	0	0	0	0	0	0	0	0	0	0	0	0	0	0	0	0	0	0	0	0	0	0	0	0	0	0	0	0	0	0	0	0	0	0	0	0	0	0	0	0	0	0	0
36	0	0	0	0	0	0	0	0	0	0	0	0	0	0	0	0	0	0	0	0	0	0	0	0	0	0	0	0	0	0	0	0	0	0.0671366230278617	0	0	0	0	0	0	0	0	0	-0.0317662007623888	0	0	0	0	0.023091543387362
37	0	0	0	0	0	0	0	0	0	0	0	0	0	0	0	0	0	0	0	0	0	0	0	0	0	-0.00943663300934227	0	0	0	0	0	0	0	0	0	0	0	0	0	0	0	0	0	0	0	0	0	0	0
38	-18.2642831400504	-0.358063415456335	-0.0955109837631328	-3.71180759675455	-0.143266475644699	-1.20577478318185	-0.0477554918815664	-0.202703906358126	-0.811637814675804	-0.0955109837631328	-0.0477554918815664	-0.0955109837631328	0	-7.05489757577501	-1.1221512855614	0	-0.0477554918815664	-0.143266475644699	-0.16704144793007	0	0.0717360114777618	-0.799750328533118	0	0	-0.573065902578797	0	0	0	-0.16704144793007	0	-0.393931421195216	0	-1.20556923587103	0	-0.143266475644699	-0.429593879623273	-1.27730524734879	-0.0477554918815664	-0.0955109837631328	-0.0477554918815664	0.0358680057388809	-0.0955109837631328	0.0358680057388809	-0.0477554918815664	0	-0.537197896839916	-0.0477554918815664	0	-0.0596429780242519
39	0	0.0127073315603491	0	0.124992282424348	0	-0.0357378127424575	-0.00521893429361724	0	0	-0.0513946156233095	-0.00571051284703431	-0.0275694071283375	-0.0104378685872345	-0.00521893429361724	-0.107819735746264	-0.0260946714680862	-0.00521893429361724	-0.057596707023761	0	-0.0156568028808517	0	-0.00521893429361724	0	-0.0156568028808517	0	0	0	-0.00521893429361724	0	0	0	0	-0.0104378685872345	0	0	0	0	0	0	0	0	0	0	0	0	0	0	0	0
40	0	0	0	0	0	0	0	0	0	0	0	0	0	0	0	0	0	0	0	0	0	0	0	0	0	0	0	0	0	0	0	0	0	0	0	0	0	0	0	0	0	-0.00708340711882415	0	0	0	0	0	0	0
41	0	0	0	0	0	0	0	0	0	0	0	0	0	0	0	0	0	0	0	0	0	0	0	0	0	0	0	0	0	0	0	0	0	0	0	0	0	0	0	0	0	0	0	0	0	0	0.0914634146341463	0	0
42	0	0	0	-0.00456746140495113	0	0	0	0	0	0	0	0	0	0	0	0	0	0	0	0	0	0	0	0	0	0	0	0	0	0	-0.0274047684297068	0	0	0	0	0	0	0	0	0	0	0	0	0	0	0	0	0	0
43	0	0	0	0	0	0	0	0	-0.00147898364244091	0	0	-0.00147898364244091	0	-0.00443695092732274	0.00223805256391399	0	0	-0.00295796728488183	0	0	0	0	0	0	0	0	0	0	0	0.00259800992439791	0	0	0	0	-0.00147898364244091	0	0	0	0	0	0	0	0	0.00259800992439791	0	0	0	0	0
44	0	0	0	0	0	0	0	0	0	0	0	0	0	0	0	0	0	0	0	0	0	0	0	0	0	0	0	0	0	0	0	0	0	0	0	0	0	0	0	0	0	0	0	0	0	0	0	0	0
45	0	-0.165143314533018	0	-0.0541858574911948	0	-0.102891353825707	0	-0.0135464643727987	0	0	0	0	0	0	0	0	0	0	0	0	0	0	0	0	0	0	0	0	0	0	0	0	0	0	0	0	0	0	0	0	0	0	0	0	0	0	0	0	0
46	0	0	0	0	0	0	0	0	0	0	0	0	0	0	0	0	0	0	0	0	0	0	0	0	0	0	0	0	0	0	0	0	0	0	0	0	0	0	0	0	0	0	0	0	0	0	0	0	0
47	-0.00486641685726799	0	0	0	0	-0.00729962528590199	0	0	0	0.00707814269535674	0	0	0.00707814269535674	-0.002433208428634	0	-0.002433208428634	0	0	0	0	0	0	0	-0.002433208428634	-0.00486641685726799	0	-0.002433208428634	0	0	0	-0.00486641685726799	-0.00729962528590199	0	0	0	0	0.0212344280860702	0	0	0	0	0	0.00707814269535674	0	0	0	0	0.00707814269535674	0.0141562853907135
48	0	0	0	0	0	0	0	0	0	0	0	0	0	0	0	0	0	0	0	0	0	0	0	0	-0.0210767431157041	-0.063230229347112	0.188128609335661	-0.04498333895908	0.203545646996021	0.248528985955101	0	0	-0.0393236335037357	0.0575705238917674	0	-0.0786472670074715	0.0758174142797993	0	0	0.0182468903880317	0.115141047783535	0	0	-0.0393236335037357	0	0	0	-0.0393236335037357	-0.0786472670074715
49	0	0	0	0	0	0	0	0	0	0	0	0	0	0	0	0	0	0	0	0	0	0	0	0	0	0	0	0	0	0	0	0	0	0	0	0	0	0	0	0	0	0	0	0	0	0	0	0	0
50	0	-0.00138890817928027	0	0	0.00257506308904568	0	0.0103002523561827	0	0	-0.00277781635856054	0	0.00257506308904568	-0.00138890817928027	0	0	0	0	-0.00020275326951486	0	0	-0.00138890817928027	0	-0.00277781635856054	0	0	0	0	0	0	0	0	0	0	0	0	0	-0.00138890817928027	0	0	0	0	0	0	0	0	0	0	0	0
51	0	0	0	0	0	0	0	0	0	0	0	0	0	0	0	0	0	0	0	0	0	0	0	0	0	0	0	0	0	0	0	0	0	0	0	0	0	0	0	0	0	0	0	0	0	0	0	0	0
52	0	0	0	0	0	0	0	0	0	0	0	0	0	0	0	0	0	0	0	0	0	0	0	0	0	0	0	0	0	0	0	0	0	0	0	0	0	0	0	0	0	0	0	0	0	0	0	0	0
53	0	-0.00132488937173746	0	0	0	0	0	0	0	0	0	0.0402937510071412	-0.00132488937173746	-0.00264977874347492	0	0	0.00783821915660762	-0.00264977874347492	0	0	0	-0.00132488937173746	0	-0.00927422560216222	-0.00132488937173746	-0.00270533728038349	0	0	0	0	-0.00132488937173746	0	0	0.00391910957830381	0	0	-0.00132488937173746	0	0	-0.00932978413907079	0	0	0.00783821915660762	0	0	0	0	0	0
54	0	0	0	0	0	0	0	0	0	0	0	0	0	0	0	0	0	0	0	0	0	0	0	0	0	0	0	0	-0.00369658435605501	0	0	0	0	0	0	0	0	-0.00369658435605501	0	0	0	0	0	0	0	0	0	0	0
55	0	-0.0348310693138279	0	-0.0139324277255312	0	0	0	0	0	-0.00696621386276559	0	0	0	0	0	0	0	0	0	0	0	-0.00696621386276559	0.130985598965894	0	-0.00696621386276559	0	0	0	0	0.0506280801847305	0	0	0	0	0.0227632247336681	0	0	0	0	0.0611594207653321	0	0	0.0122318841530664	0	0	0	0	0	-0.083594566353187
56	0	0	0	0	0	0	0	0	0	0	0	0	0	0	0	0	0	0	0	0	0	0	0	0	0	0	0	0	0	0	0	0	0	0	0	0	0	0	0	0	0	0	0	0	0	0	0	0	0
57	-0.00267265341030575	-0.00801796023091726	0	0	0	0	0	0.0119399420912809	-0.00267265341030575	0	0	0.000762999827353401	0	0	0	0.019609909301818	0.00031233211251446	0	0	0	-0.00267265341030575	-0.0287745232883344	-0.00267265341030575	0	0	0	-0.00801796023091726	0	-0.00236032129779129	0	0	0	0	0	0	0	-0.00503297470809705	-0.00267265341030575	0	-0.00801796023091726	0	0	-0.00267265341030575	0	0.00895495656846064	0	0.00031233211251446	0	0
58	0	0	0	0	0	0	0	0	0	0	0	0	0	0	0	0	0	0	0	0	0	0	0	0	0	0	0	0	0	0	0	0	0	0	0	0	0	0	0	0	0	0	0	0	0	0	0	0	0
59	0	0	0	0	0	0	0	0	-0.00509502216334641	0	0	0	0	0	0	0	0	0	0	0	0	0	0	0	0	0	0	0	0	0	0	0	0	-0.0101900443266928	0	0	0	-0.00254751108167321	0.00801860315932964	0	0	0	0	0	0	0	-0.00254751108167321	0	0
60	0	0	0.00161100639569539	-0.00214982102739947	-0.00376354617280328	0	0	0	0	0	0	0	0	0	0	0	-0.0032247315410992	0	0	0	0	0	0	0	0	0	0.00161100639569539	0	0	0	0	0	0	0.00053609588199566	0	-0.00214982102739947	0	0	0	-0.00107491051369973	0	0.00483301918708617	0	0	-0.00107491051369973	0	0	0	0
61	0	0	0	0	0	0	0	0	0	0	0	0	0	0	0	0	0	0	0	0	0.0146799765120376	0	0	0.0146799765120376	0	0	0	-0.0195160031225605	0	0	0	0	0	-0.00975800156128025	0	0.0146799765120376	0.0293599530240752	0	0.0342819279748325	2.36476544354157	0.0832438324617025	0.0146799765120376	0.0342819279748325	0	-0.00975800156128025	0.0146799765120376	0	0	0
62	0	0.0366300366300366	0.0270172986935993	0	-0.0115606936416185	0.654004954582991	0	0.0366300366300366	2.50303838743145	0.0154566050519808	0.185098138855364	-0.0115606936416185	0	-0.0346820809248555	1.26917783565182	0.086768722606873	0	0	0.0752080289652545	0.0366300366300366	0.0758432319126001	-0.0346820809248555	0	0	0	-0.219653179190751	0	0.0366300366300366	-0.023121387283237	-0.481653221537615	0	0	-0.0115606936416185	-0.092485549132948	0	0	-0.0115606936416185	0	0	-0.046242774566474	0	0	-0.20017362213894	-0.023121387283237	0	0	0	0.192889961676089	-0.0115606936416185
63	0	0	-0.0214477211796247	0	0	0	0	0	0	0	0	0	0	0	0	0	0	0	0	0	0.0219370406932105	0	0	0	0	0	0	0	0.0329055610398157	0	0	0	0	0	0	0	-0.0214477211796247	0.0109685203466052	0	0	0	0	0	0	0	0	0	0	0
64	0	0	0	0	0	0	0	0	0	0	0	0	0	0	0	0	0	0	0	0	0	0	0	0	0	0	0	0	0	0	0	0	0	0	0	0	0	0	0	0	0	0	0	0	0	0	-0.000841149009547041	0	0
65	0	0	0	0	0	-0.0272430076280421	0	-0.0181620050853614	0	0	0	0	0	0	0	0	0	0	0	0	0	0	0	0	0	0	0	0	0	0	-0.0101482143799616	0	0.0265315330698549	-0.0181620050853614	-0.00908100254268071	0	0	0.0178062678062678	0	0.0174505305271742	-0.00908100254268071	0.106481869558514	0	0	0.142094405171049	-0.00908100254268071	0	0	0
66	0.00513625514731542	-0.0014756227127848	0	0	0	0	0.0378125265959044	0	0	0	0	0	0	0	0.0110387459984546	0	0	-0.0014756227127848	0	0	0	0	-0.00628560870305111	-0.00737811356392398	0	0	-0.0014756227127848	-0.00295124542556959	0	-0.00295124542556959	-0.0159055806835836	-0.00295124542556959	-0.0014756227127848	0	0	0	0	0	0	0	0	0	0	0	0	0	0	0	0
67	0	0	0	0	0	0	0	0	0	0	0	0	0	0	0	0	0	0	0	0	0	0	0	0	0	0	0	0	0	0	0	0	0	0	0	0	0	0	0	0	0	0	0	0	0	0	0	0	0
68	0	0	0	0	0	0	0	0	0	0	0	0	0	0	0	0	0	0	0	0	0	0	0	0	0	0	0	0	0	0	0	0	0	0	0	0	0	0	0	0	0	0	0	0	0	0	0	0	0
69	0	0	0	0	0	0	-0.0051495957567331	0	0	0	0	0	0	0	0	0	0	0	0	0	0	0	0	0	0	0	0	0	0	0	0	0	0	0	0	0	0	0	0	0	-0.0051495957567331	0	0	0	-0.0051495957567331	0	0	0	0
70	0	0	0	0	0	0	0	0	0	0	0	0	0	0	0	0	0	0	0	0	0	0	0	0	0	0	0	0	0	0	0	0	0	0	0	0	0	0	0	0	0	0	0	0	0	0	0	0	0
71	0	0	0	0	0	0	0	0	0	0	0	0	0	0	0	0	0	0	0	0	0	0	0	0	0	0	0	0	0	0	0	0	0	0	0	0	0	0	0	0	0	0	0	0	0	0	0	0	0
72	-0.0136944092574207	-0.0359478243007292	0.00488456482646669	-0.0154062104145982	-0.0291006196720189	-0.0226923826721741	-0.0259278560027298	-0.020667033208664	-0.0159078877047303	-0.0173061405555753	-0.0019626398022436	-0.000125419322533011	-0.00690991428997684	0.0130046029834891	-0.0074115915801089	-0.0122961564065756	0.0134435706123546	0.0130046029834891	-0.0226923826721741	-0.0280159151275064	-0.0273888185148413	-0.008809844430954	-0.0036117312981547	-0.00354902163688818	0.00152367217337809	-0.0119826081002431	-0.0088725540922204	-0.029351458317085	-0.0154062104145982	-0.0141960865475527	-0.0155943393983977	0.0168044632654433	0.0041947585525352	-0.0105216455881316	-0.0157197587209308	-0.010333516604332	0.010082677959266	-0.0171180115717758	0.0249245014224657	-0.00690991428997684	0.020165355918532	0.00830816714082185	-0.0037371506206877	-0.00342360231435516	0.00164909149591108	-0.00684720462871033	-0.00171180115717758	-0.010333516604332	0.010082677959266
73	0	0	0	0	0	0	0	0	0	0	0	0	0	0	0	0	0	0	0	0	0	0	0	-0.000871778777417443	0	0	-0.000871778777417443	0	0	0	0	0	0	0	0	0	0.00195805838930117	0	0	0	0	0	0	0	0	0	0	0	0
74	0	0	0	0	0	0.0129886998311469	0	0	0	0	0	0	0	0	0	0	0	0.0259773996622938	0	0	0	0	0	0	0.0389660994934407	0	0.0389660994934407	0.0031713034046792	0	0	0	0	-0.0231095824700447	0	0	0	0	0	0	0	0	-0.0098173964264677	0	0	0	0	-0.0098173964264677	-0.0199382790653655	0
75	0	0	0.0134585063355399	0	0	-0.00718132854578097	0	0	0	0	-0.00718132854578097	0	0	-0.0215439856373429	0	0	0	0	0	0	0	-0.00718132854578097	0	0	0	0.0340983412168609	0	0	0	0	0	0	0	0	0	0	0	0	0	0	0	0	0	0	0	0	0	0	0
76	0	0	0	0	0	0	0	0	0	0	0.0175932441942294	0	0	0	0	0.0527797325826882	0	0	-0.0278836323078353	0	0	0	0	0.0175932441942294	0	0	0	0	0	0	0	-0.00929454410261177	0	0	0	0	0	0	0	0	0	0	0	0	0	0	0	0	0
77	0	0	0	0	0	0	0	0	0	0	0	0	0	0	0	0	0	0	0	0	0	0	0	0	0	0	0	0	0	0	0	0	0	0	0	0	0	0	0	0	0	0	0	0	0	0	0	0	0
78	0	0	0.0748502994011976	0	0.0748502994011976	0	0	0	-0.0142233348030779	0	0	0	0	-0.31540244925825	0	0	0	-0.176902726613282	0	0	-0.148456057007126	0	0	-0.0593824228028504	0	-0.0439145462045034	0	0	0	0	-0.0296912114014252	0	0	0	0.375496038801257	0	0.0748502994011976	0	0	0	0	0.0154678765983472	0	0	0.149700598802395	0	6.20155176582702	0.0748502994011976	0
79	0	0	0	0	0	-0.00731850117096019	0.0597609561752988	0	0	0	0	0	0	-0.0166721871297013	0	-0.002035184787781	0	0	0	0.0199203187250996	0	0	0	0	-0.00731850117096019	0	0	0	0	-0.002035184787781	-0.00731850117096019	0	-0.00731850117096019	-0.0207425567052633	-0.0146370023419204	0	0	0	0	0	0	0	0	0	-0.0292740046838408	0	0	0	0
80	0	0	0.0309310238168883	0	0	0	0	0	0	0	0	0	0	0	0	0	0	0	0	-0.00315985717445571	0	0	0	0	0	0	0.00914579755953277	0	0	0	-0.00315985717445571	0	0	0	0	0	0	0	0	-0.00631971434891143	0	0	0	0	0	0	0	0	0
81	0	0	0	0	0	0	0	0	0	0	0.00533731853116994	-0.00223828815721736	0	0	0	0	0	0	0	0	0	0	0	0	0	0	0	0.00533731853116994	0	0	0	0.00533731853116994	-0.00447657631443472	0	0	0	-0.0027550918809643	0	0.0087802873981108	0	0.00309903037395258	0	0	-0.00671486447165208	0	0.00533731853116994	0	0	0
82	0	-0.0252908447142135	0	0	0	0	0	0	0	0	0	0	0.222593210907067	-0.0252908447142135	0	0	0.0303574580125533	0	-0.0505816894284269	0	0	0	0	0	0	0	0	0	0	0	-0.0252908447142135	0	0	0	0	0	0	0	0	0	0	0	0	0	0	-0.0252908447142135	0	0	0
83	0	0	0	0	0	0	0	0	0	0	0	0	0	0	0	0	0	0	0	0	0	0	0	0	0	0	-0.0139742873113471	0	0	0	0	0	0	0	0	0	0	0	0	0	0	0	0	0	0	-0.0139742873113471	0	0	0
84	0	0	0	0	0	0	0	0	0	0	0	0	0	0	0	0	0	0	0	0	-0.0091441111923921	0	0	0	0	0	0	0	0	0	0	0	0	0	0	0	0.0136713120337087	0	0	0	0	0	0	0	0	0	-0.0091441111923921	0	0
85	0	-0.0115727346371948	0	0	0	0	0	0	0	0	0	0	-0.0156630671858388	0	0	0	0	0	0	0	0	-0.0115727346371948	0	0	0	-0.0231454692743895	0	0	0	0	0.140868359168769	0	0	0	-0.0115727346371948	0	0	0	-0.0115727346371948	0	-0.0231454692743895	0	0	0.0306278713629403	0	0	0	-0.004090332548644	0
86	0	0	0	0	0	0	0	0	0	0	0	0	0	0	0	0	0	0	0	0	0	0	0	0	0	0	0	0	0	0	0	0	0	0	0	0	0	0	0	0	0	0	0	0	0	0	0	0	0
87	0	0	0	0	0	0	0	0	0	0	-0.0185816042118303	0	0	0	0	0	0	0	0	0	0	0	0	0	0	0	0	0	0	0	0	0	0	0	0	0	0	0	0	0	0	0	0	0	0	0	0	0	0
88	0	0.0274574409665019	0.0823723228995058	-0.0133725595078898	-0.0267451190157796	0	-0.0133725595078898	0	-0.0133725595078898	0	-0.0267451190157796	0.0274574409665019	0	0	0	0	0	0	0	0	0	0	0	0	0	0	0	0	0	0	0	0	0	0	0	0	-0.0133725595078898	0	0	0	0	0	0	0	0	0	-0.0133725595078898	0	0
89	0	0	0	0	0	0	0	0	-0.00461105731544243	0	0	0	0	0	0	0	0	0	0	0	0	0	0	0	0	0	0	0	0	0	0	0	0	0	0	0	0	0	0	0	0	0	0	0	0	0	0	0	0
90	0	0	0	0	0	0	0	0	0	0	0	0	0	0	0	0	0	0	0	0	0	0	0	0	0	0.0405350628293474	0	0	0	0	0.121605188488042	0	0	0	0	0	0	0	0	0	0	0	0	0	0	0	0	0	0
91	0	0	0	0	0	0	0	0	0	0	0	0	0	0	0	0	-0.0572573718866304	0	0	0	0	0	0	0	0	0	0	0	0	0	0	0	0	0	0	0	0	0	0	0	0	-0.0286286859433152	0	0	0	0	0	0	0
92	-0.0144618388228063	0	0	0	0	0	0	0	0	0	0	0	0	0	0	0	0	0	0	0	0	0	0	0	0	0	0	0	0	0	0	0	0	0	0	0	0	0	0	-0.00361545970570158	0	0	0	0	0	0.0136770840456815	-0.0108463791171047	0	0
93	0	0	0	0	0	0	0	0	0	0	0	0	0	0	0	0	0	0	0	0	-0.0135722041259501	0	0	0	0	0	0	0	0	0.0131630906936949	0	-0.00678610206297503	0	0	0	0	0	0	0	0	0	0	0	0	0	0	0	0	0
94	0	0	0	0	0	0	0	0	0	0	0	0	0	0	0	0	0	0	0	0	0	0	0	0	0	0	0	0	0	0	0	0	0	0	0	0	0	0	0	0	0	0	0	0	0	0	0	0	0
95	0	0	0	0	0	0	0	0	0	0	0	0	0	0	0	0	0	0	0	0	0	0	0	0	-0.00893734918223255	0	0	0	-0.0268120475466977	-0.00893734918223255	0	0	0	0	0	0	0	0	0	0	0	0	0	0	0.0326763522153487	0	0	0	0
96	0	0	0	0	0	0	0	0	0	0	0	0	0	0	0	0	0	0	0	0	0	0	0	0	0	0	0	0	0	0	0	0	0	0	0	0	0	0	0	0	0	0	0	0	0	0	0	0	0
97	0	0	-0.0146070698217937	0	0	0.0511378164152391	0	0.0511378164152391	0	0	0	0	0	0.0767067246228586	0	0	0	0	0	0	0	0	0	0	0	0	0	0	0	0	-0.0146070698217937	0	0	-0.0146070698217937	0	0	0	0	0	0	0	0	0	0	0	0	0	0	0
98	0	0	0	0	0	0	0	0	0.114025085518814	0	0	0	0	0	0	0	0	0	0	0	0	0	0	0	0	0	0	0	0	0	0	0	0	0	0	0	0	0	0	0	0	0	0	0	0	0	0	0	0
99	0	0	0	0	0	0	0	0	0	0	0	0	0	0	0	0	0	0	0	0	0	0	0	0	0	0	0	0	0	0	0	0	0	0	0	0	0	0	0	0	0	0	0	0	0	0	0	0	0
100	0	0	0	0	0	0	0	0	0	0	0	0	0	0	0	0	0	0	0	0	0	0	0	0	0	0	0	0	0	0	0	0	0	0	0	0	0	0	0	0	-0.00332115576220525	0	0	0	0	0	0	0	0
101	0.269582634114657	-0.205344737364442	-0.371352785145889	-0.636604774535809	-0.424403183023873	-0.523647124632346	0.225915299806926	0.391923347588372	0.00685685414749498	0.172864901928941	-0.046193543730489	0.029953626012739	0.24901207167217	0.225915299806926	0.166008047781447	0.385066493440878	0.551074541222325	-0.106100795755968	0	-0.318302387267904	-0.159151193633952	0.142911275916202	-0.318302387267904	-0.023096771865245	0.54421768707483	-0.288348761255166	-0.212201591511936	-0.371352785145889	0.136054421768707	-0.159151193633952	-0.26525198938992	0.119814504050957	0.302062469550154	-0.34139915913315	0.172864901928941	-0.106100795755968	0.195961673794186	0.272108843537415	0.172864901928941	0.136054421768707	0.00685685414749498	-0.106100795755968	-0.553600750645086	0.219058445659431	1.06533860228442	0.302062469550154	0.219058445659431	-0.477453580901857	0.103574586333207
102	0	0	0	0	0	0	0	0	0	0	0	0	0	0	0	0	0	0	0	0	0	0	0	0	0	0	0	0	0	0	0	0	0	0	0	0	0	0	0	0	0	0	0	0	0	0	0	0	0
103	0	0	0	0	0	0.014046916701784	0	0	0	0	0	0	0	0	0	-0.0118483412322275	0	0	0	0	0	0	0	0	0	-0.0118483412322275	0	0	0	0	0	0	0	0	0	-0.0473933649289099	0	0	0	0	0	0	0	0	0	0	0	0	0
104	0	0	0	0	0	0	0	0	0	0	0	0	0	0	0	0	0	0	0	0	0	0	0	0	0	0	0	0	0	0	0	0	0	0.0359787500507513	0	0	0	0	0.147329650092081	0.108789912624523	0	0	0	0	-0.0188430374976446	0	0	0	0
105	0	0	0	0	0	0	0	0	0	0	0	0	0	0	0	0	0	0	0	0	0	0	0	0	0	0	-0.002389486260454	0	0	0	0	0	-0.002389486260454	0	0	0	0	0.00609124687823598	0	0	0	0	0	0	0	0	-0.002389486260454	0	0
106	0	0	0	0	0	0	0	0	0	0	0.145444950730167	0	0	0	0	0	0	0	0	0	0	0	0	0	0	0	-0.0497265042267529	0	0	0	0	0	0	0	0	0	0	0	0	0	0	0	0	0	0	0	0	0	0
107	0	0	0	0	0	0	0	0	0	0	0	0	0	0	0	0	0	0	0	0	0	0	0	0	0	0	0	0	0	0	0	0	0	0	0	0	0	0	0	0	0	0	0	0	0	0	0	0	0
108	0.285810669760412	0.0119189511323004	0.0646854377600022	0.0119189511323004	0.270172387342717	0	-0.0546261522703995	0.0119189511323004	0.229569009262111	-0.0341413451689997	0	0.122542606486204	0.00509068209850047	-0.194271985663077	0.0357568533969011	0.0542599161482049	-0.0136565380675999	0	-0.276850092637392	-0.0290506630704992	-0.0204848071013998	0	0	0	-0.00682826903379993	0	0	-0.00682826903379993	0	0	0	-0.00682826903379993	0	-0.0136565380675999	0	0	-0.156899624038274	-0.0204848071013998	0.0238379022646007	0	0	-0.0855364809835959	-0.0682826903379993	-0.0376165190395987	0	0	0	-0.273130761351997	-0.00682826903379993
109	0	0	0.0140773444174465	0	0.0274499039253363	0.0823497117760088	-0.0133725595078898	-0.0267451190157796	0	-0.0133725595078898	0	-0.0133725595078898	0	-0.0267451190157796	0.0274499039253363	0	0	0	0	0	0	0	0	0	0	0	0	0	0	0	0	0	0	0	0	0	0	0	0	-0.0133725595078898	0	0	0	0	0	0	0	0	0
110	0	0	0	0	0	0	0	0	0	0	0	0	0	0	0	0	0	0	0	0	0	0	0	0	0	0	0	0	0	0	0	0	0	0	0	0	0	0	0	0	0	0	0	0	0	0	0	0	0
111	0	0	0	0	0	0	0	0	0	0	0	0	0	0	0	0	0	0	0	0	0	0	0	0	0	0	0	0	0	0	0	0	0	0	0	0	0	0	0	0	0	0	0	0	0	0	0	0	0
112	0	0	0	0	0	0	-0.0181587071000545	0	0	-0.0181587071000545	0	0	0	0	0	-0.0181587071000545	0	0.0821421956080695	0.0334336342360415	0	-0.0181587071000545	0.0334336342360415	0	0	0	0	0	0	-0.0181587071000545	0	0	-0.0363174142001089	0	0	0	0	0	0	0	0	-0.0181587071000545	0	0	0	0	0	0	0	0
113	-0.203665987780041	0	-0.161248895610257	0	-0.0678886625933469	-0.260950377330942	0	-0.0678886625933469	0	0	0.0106042730424459	-0.271554650373388	-0.203665987780041	-0.135777325186694	-0.260950377330942	0.167590144314031	0.25668735299227	-0.203665987780041	-0.0678886625933469	-0.125173052144248	-0.458275116407208	0.0106042730424459	0.235478806907378	-1.6315127022139	-0.475220638153428	-0.025471570423564	0	0.031812819127337	0.12932950087445	-0.0572843895509012	-0.0678886625933469	0	-1.56996528832433	0.099701481720684	0	0.0784929356357928	-0.046680116508455	0.167590144314031	-0.339443312966735	0.0784929356357928	-0.203665987780041	-0.464616365110982	-0.997121392815314	0.335180288628063	-0.082755959974464	0.0890972086782391	-0.271554650373388	0.0784929356357928	-0.135777325186694
114	0	0	0	0	0	0	0	0	0	0	0	0	0	0	0	0	0	0	0	-0.00118298395873752	0	0	0	0	0	0	0	0	0	0	0	0	0	0	0	0	0	0	0	0	0	0	0	0	0	0	0	0	0
115	0	0	0	0	0	0	0	0	0	0	0	0	0	0	0	0	0	0	0	0	0	0	0	0	0	0	0	0	0	0	0	0	0	0	0	0	0	0	0	0	0	0	0	0	0	0	0	0	0
116	0	0	0	0	0	0	0	0	0	0	0	0	0	0	0	0	0	0	0	0	0	0	0	0	0	0	0	0	0	0	0	0	0	0	0	0	0	0	0	0	0	0	0	0	0	0	0	0	0
117	0.00705417607223476	0	0	0	0	0	0	0	-0.00428100518001627	0	-0.00428100518001627	-0.00856201036003254	-0.00428100518001627	0	0	0	0	0	0	0.00705417607223476	0	-0.00428100518001627	0	0	0	0	-0.00856201036003254	0	0	0.0211625282167043	0.00705417607223476	0.0141083521444695	-0.00428100518001627	0.00705417607223476	0	-0.00578883946781404	-0.00856201036003254	0.00705417607223476	0	0	0	0.00554634178443696	0	0.00705417607223476	0	0	0.00705417607223476	0	0
118	-0.0274763016897926	0	-0.0412144525346888	0	-0.0274763016897926	0	0	0	0	0	0	0	0.0183637166462147	0	0	0.0229200091680037	0	-0.0137381508448963	0	-0.0137381508448963	0.0229200091680037	0	0	-0.0137381508448963	0	0	0	-0.0274763016897926	0	0	0	0	0	0	0	0	0	0	0	0	0	-0.0274763016897926	0.0229200091680037	0	0	0	0	0	0
119	0	0	0	0	0.0429922613929493	0	0	0	0	-0.0567966679288148	0	0	-0.0189322226429383	0	0	0	-0.0378644452858766	0	-0.0378644452858766	0	0	0	0	0	0	0	0	0	0	0	0	0	0	0	0	0	0	0.024060038750011	0	0	0	0	0	0	0	0	0	0	0
120	0	0	0	0	0	0	0	0	0	0	0	0	0	0	0	-0.0526950622309808	0	0	0	-0.00834794223223975	0	0.0281769512538743	0	0	0	0.0281769512538743	-0.00834794223223975	0	0	0	0	0.0088736579518525	0	0	0.041235165202107	0	0	0	0	-0.00834794223223975	0	0	-0.0166958844644795	0	0	0	0	0	0
121	0	0	-0.0194024058983314	0	0	0	0	0	0	0	0	0	0	0	0	0	0	0	0	0	0	0	0.0197316495659037	0	0	0	0	-0.0194024058983314	0	-0.0097012029491657	0	0	0	0	0	0	0	0	0	0	0	0	0	0	0	0	0	-0.0097012029491657	0
122	0	0	0	0	0	0	0	0	0	0	0	0	0	0	0	0	0	0	0	0	0	0	0	0	0	0	0	0	0	0	0	0	0	0	0	0	0	0	0	0	0	0	0	0	0	0	0	-0.00114399460034549	0
123	0	0	0	0	0	0	0	0	0	0	0	0	0	0	0	0	0	0	0	0	0	0	0	0	0	0	0	0	0	0	0	0	0	0	0	0	0	0	0	0	0	0	0	0	0	0	0	0	0
124	0	0	0	0	0	0	0	0	0	0	0	0	0	0	0	0	0	0	0	0	0	0	0	0	0	0	0	0	0	0	0	0	0	0	0	0	0	0	0	0	0	0	0	0	0	0	0	0	0.119189511323004
125	0	0	0	0	0	0	0	0	0	0	0	0	0	0	0	0	0	0	0	0	0	0	0	0	0	0	0	0	0	0	0	0	0	0	0	0	0	0	0	0	0	0	0	0	0	0	0	0	0
126	0.0604743413623829	0.0089956492154287	0.0081590714537	-0.0043620275156516	-0.009317601280524	0.0077228687021348	-0.280318239156641	-0.0132434260446103	0.0104616009677798	4.77434839049196	0.04003720245184	-0.0039258247640865	-0.00043620275156516	-0.042512103210662	-0.0030534192609561	-0.00140156133933202	0.0077228687021348	0.0057921515266011	-0.60732052296715	-0.0048911833518534	-0.00507708952112638	-0.21612129594112	-0.0013729986677145	0.103435684641621	0.0073796190352062	0.00149451442396854	0.30345758594089	-0.0122422397154421	-0.0055132922726915	0.13564303277464	-0.017598188490478	-0.00140156133933202	0.0081590714537	-0.34434211447688	-0.00975380403208931	0.0049197460234707	-0.0232044338478061	-0.0172549388235493	-0.00280312267866403	-0.0084093680359921	-0.256314349068054	-0.0030534192609561	-1.13264796595706	-0.437165622115334	-0.0154171747326522	-0.00884557078755723	-0.0530734247253436	-0.00280312267866403	-0.0358184859017942
127	0	0	0	0	0	0	0	0	0	0	0	0	-0.0228154232261008	0	0	0	0	0	0	0	0	0	0	0	0	0	0	0	0	0	0	0	0	0	0	0	0	0	0	0	0	0	0	0	0	0	0	0	0
128	0	0	0	0	0	0	0	0	0	0	0	0	0	0	0.00691945751453086	0	0	0	0	0	0	0	0	0	0	0	0	0	0	0	0	0	0	0	0	0	0	0	0	0	0	0	0	0	0	0	0	0	0
129	0.0978473581213307	-0.542986425339366	-0.0904977375565611	0	0	0	0	0	0	-0.80713001744428	-0.0904977375565611	-0.173645854548352	0.1051969786861	0	0	0	-0.0904977375565611	0	0	0	0	0	0	0	0	0	0	0	0	0	-0.0904977375565611	0	0	0	0	0	-0.0904977375565611	0	0	0.195694716242661	-0.180995475113122	0	0	0	-0.180995475113122	-0.166296233983583	-0.180995475113122	0.1051969786861	-0.633484162895928
130	0	0	0	0	-0.00435293605536935	0	0	0	0	0	0	0	0	0	0	0	0	-0.00870587211073869	0	0	0.00906400794257091	0	0	0	0	0	-0.00435293605536935	0	0	0.00888494002665482	0	0.00888494002665482	0	0	0	0	0	0	0	0	0	0	0	-0.00870587211073869	0	0	0	0	0
131	0	0	0	0	0	0	0	0	0	0	0	0	0	0	0	0	0	0	0	0	0	0	0	0	0	0	0	0	0	0	0	0	0	0	0	0	0	0	0	0	0	0	0	0	0	0	0	0	0
132	0.0327890353465801	0	0	0	0	0	0	0	0	0	0	0	0	0	0	-0.0038311240517968	0	-0.0019155620258984	0	0	0	0	0	0	0	0	0	0	0	0	-0.0038311240517968	0	0	0	0	0	0	0	0	-0.0019155620258984	0	0	0	0	0	0	0	0	0
133	0	0	0	0	0	0	0	0	0	0	0	0	0	0	0	0	0	0	0	0	0	0	0	0	0	0	0	0	0	0	0	0	0	0	0	0	0	0	0	0	0	0	0	0	0	0	0	0	0
134	0	0	0	0	0	0	0	0	0	0	0	0	0	0	0	0	0	0	0	0	0	0	0	0	0	0	0	0	0	0	0	0	0	0	0	0	0	-0.00969555943377933	0	0	0	0	0	0	0	0	0	0	0
135	0	0.0199005619659597	0.0192240148322163	0	0	0	0	0	0	0	0	0	-0.0377714825306893	0.0195622883990879	0	-0.0377714825306893	0	0	0	0	0	0.038109756097561	-0.0188857412653447	0	0	-0.0944287063267233	0	0	0	0	0	0	0	0	0	0	0	0	0	0	-0.0377714825306893	0.038109756097561	-0.0377714825306893	0	0.0384480296644326	-0.0188857412653447	0	0	0
136	0	0	0	0	0	0	0	0	0	0	0	0	0	0	0	0	0	0	0	0	0.0508001016002032	0	0	0.0508001016002032	0	0	0	0	0	0	0	0	-0.0540248514316586	0.0254000508001016	0	0	0	0	0	0	0	0	0	0	0	0	0	0	0
137	0	0	0	0	0	0	0	0	0	0	0	0	0	0	0	0	0	0	0	0	0	0	0	0	0	0	0	0	0	0	0	0	0	0	0	0	0	0	0	0	0	0	0	0	0.170068027210884	0	0	0	0
138	0	0	0	0	0	0	0	0	0	0	0	0	0	0	0	0	0	0	0	0	0	0	0	0	0	0	0	0	0	0	0	0	0	0	0	0	0	0	0	0	0	0	0	0	0	0	0	0	0
139	0	0	0	0	0	0	0	0	0	0	0	0	0	0	0	0	0	0	0	0	0	0	0	0	0	0	0	0	0	0	0	0	0	0	0	0	0	0	0	0	0	0	0	0	0	0	0	0	0
140	0	0	0	0	0	0	0	0	0	-0.0586510263929619	0	0	0	0	0	0	0	0.417982635483119	0	0	0	-0.0293255131964809	0	-0.15392758680377	0	0.197978571554001	0	0	0	0	0	0	0	0	-0.0293255131964809	0	0.452174829227176	0	0	0	0.0268921729226925	0	0	0.110002031964558	0.0855431993156544	0	0.914208449460529	0.171086398631309	-0.0879765395894428
141	0	0	0	0.00762311327946333	-0.00390762377398304	0	0	0	0	0	0	0	0	0	0	0	0	0	0	0	0	0	0	0	0	0	0	0	-0.00390762377398304	0.02286933983839	0	0	0	0	0	0	0	0	0.00762311327946333	0	0	0	0	0	0	0	0	0	0
142	0	0	0	0	0	0	0	0	0	0	0	0	0	0	0	0	0	0	0	0	0	0.0226654578422484	0	0	0	0	0	0	0	0	0	0	0	0	0	0	0	0	0	0	0	0	0	0	0	0	0	0	0
143	0.00550739994697207	0	0.00393344609212131	0	-0.00471898447454108	0.00786689218424261	0	-0.00235949223727054	0	-0.00235949223727054	0	-0.00707847671181162	0.00393344609212131	0	0	-0.00235949223727054	-0.00471898447454108	0	0	0	-0.00314503061969031	-0.00235949223727054	0.00393344609212131	0	0	0	-0.00943796894908216	0	0	0	0	-0.00707847671181162	0.00393344609212131	0	0	0	0	0	0	0	0	0.00786689218424261	0	-0.00314503061969031	0	0	-0.00471898447454108	0	0
144	0	0	-0.0324993603951553	0	0	0	-0.00572836111588475	0	-0.00572836111588475	0	-0.0114567222317695	0	-0.00572836111588475	0	0.0305126118795769	0	0	0	0.0031566579053971	-0.0114567222317695	0	0	0.0451259920167435	0	0	0	0	0	-0.0114567222317695	0	0	0	0	-0.0114567222317695	0.0101708706265256	-0.00572836111588475	0	0.0101708706265256	0.0146133801371665	0	0.0101708706265256	-0.0171850833476542	-0.00572836111588475	-0.0114567222317695	0	-0.00572836111588475	0	-0.0343701666953085	0
145	0	0	0.0370988684845112	0	0	0	0	0	0	0	0	0.0251585699770485	0	0	-0.0119402985074627	-0.013437542393763	0	0	0	0	0	0.0370988684845112	0	0	0	-0.0119402985074627	0	0	0	0.0251585699770485	0.0185494342422556	0.3641226256032	0.0622574384615597	0.017052190355955	0	0.0012779729621231	0	-0.0650326553099832	0	0	0	0	-0.090410496211209	-0.0106623255453395	0	-0.304057896383414	-0.0119402985074627	-0.0477611940298507	0
146	0	0	0	0.012987012987013	0	0	0	-0.101010101010101	-0.0505050505050505	0	0	0	0	0	0	-0.0505050505050505	0	0	0	0	-0.101010101010101	0	0	0	0	0	0	0	0	0	0	0	0	0	0	0	0	0	0	0	0	0	0	0	0	0	0	0	0
147	0	0	0	0	0	-0.00235190818150459	0	0	0	0	0	0.00160325781989002	0	0	0	0.00160325781989002	0	0	0	0	0	0	0	0	0	0	0	0	0	0	0	0	-0.000783969393834865	0	0	0	-0.00156793878766973	0	0	-0.00156793878766973	0	0	0	-0.00156793878766973	0	0	-0.000783969393834865	0	0
148	0	0	0	0	0	0	0	0	0	-0.0095565749235474	0	-0.0095565749235474	0	0	-0.0191131498470948	0.0348250043531255	0	0	0	0	0	0	0	0	-0.0191131498470948	0	0	0	0	0	0	0	0	-0.0095565749235474	0	0	0	0	0	0	0	0	0	0	0	0	0	0	0
149	-0.0614476019841069	0	-0.0294464075382803	0	-0.0588928150765607	-0.0908940095223879	0	0	0	0	0	0	-0.0294464075382803	0	-0.0294464075382803	0	0	0	0	0	0	0	0	0	0	0	0	0	-0.0294464075382803	0	0	0	0	0	0	0	0	0	0	-0.0588928150765607	0	0	-0.0294464075382803	0	0.112676056338028	0	0	0	0
150	0	0	0	0	0	0	0	0	0	0	-0.126143172500788	0	0	-0.0946073793755913	0	-0.0630715862503942	0	0	0	0	0	0	0	0	0	0	-0.0315357931251971	0	0	0	0	0	0	0	0	0	0	-0.0315357931251971	0	-0.0329170647549867	0	0	0	0	0	0	0	0.0616903146206046	0
151	0	0	0	0	0	0	-0.00259895522000156	0	0	0	0	0	0	0	0	0	0	0	0.00424844931599966	0	0	0	0	0	0	0	0	0	0	0	0	0	0	0	0	0	0	0	0	0	0	0	0	0	0	0	0	0	0
152	0	0	0	0	-0.0256673511293634	0	0	0	0	0	0	0	0	0	0	0	0	0	0	0	0	0	0	0	0	0	0	0	0	0	0	0	0	0	0	0	0	0	0	0	0	0	0	0	0	0	0	0	0
153	0	0	0	0	0	0	0	0	0	0.0512360701934162	0	0.012809017548354	0	0	0	0	0	0	0	0	0.012809017548354	0	0	0	0	0	0	0	-0.0123183050012318	0	-0.069493417083291	0.0408806153806728	0.0640450877417702	0	0	0	0	0.092607398121212	0	0.000490712547122201	-0.2943691476809	-0.054230836799326	15.5096958645681	0.23183248821903	1.84659865043636	-0.056684399534937	0.012809017548354	0.066989363024503	0.0384270526450621
154	0	0.0547645125958379	0	0	0	0	0	0	0	0	0	0	0	0	0	0	0	0	0	0	-0.063626723223754	0.0547645125958379	0	0	-0.0212089077412513	0	0	0	0	0	0	0	0	0	0	0	0	0	0	0	0	0	0	0	0	0	0	0	0
155	0	0	0	0	0	0	0	0	0	0	0	0	0	0	0	0	0	0	0	0	0	0	0	0	0	0	0	0	0.0741839762611276	0	0	0	0	0	0	0	0	0.408567503894863	0.0741839762611276	0	0	0	0.559157994251758	-0.0365363536719035	0.148367952522255	-0.10849779209839	-0.0730727073438071	0	0.112942867767672
156	0	0	0	0	0	0	0	0	0	0	0	-0.0963391136801541	0	0	0	0	-0.0963391136801541	0	0	0	0	0	0	0	0	0	0	0	0	0	0	0	0.20703933747412	0	0	0	0	0	0	0	0	0	0	0	0	0	0	0	0
157	0	0	0	0	0	0	0	0	0	0	0	0	0	0	0	0	0	0	0	0	0	0	0	0	0	0	0	0	0	0	0	0	0	0	0	0	0	0	0	0	0	0	0	0	0	0	0	0	0
158	0	0	0	0	0	0	0	0	0	0	0	0	0	0	0	0	0	0	0	0	0	0	0	0	0	0	0	0	0	0	0	0	0	0	0	0	0	0	0	0	0	0	0	0	0	0	0	0	0
159	0	0	0	0	0	0	0	0	0	0	0	0	0	0	0	0	0	0	0	0	0	0	0	0	0	0	0	0	0	0	0	0	0	0	0	0	0	0	0	0	0	0	0	0	0	0	0	0	0
160	0	0	0	0	0	0	0	0	0	0	0	0	0	0	0	0	0	0	0	0	0	0	0	0	0	0	0	0	-0.0510594842992086	0	0	0	0	0	0	0	0	0	0	0	0	0	0	0	0	0	0	0	0
161	0.2	0	0	0	0	0	0	0	0	0	0	0	0	0	0	0	0	0	0.132614555256065	0	0	0	0	0	0	0	0	0	0	0	0	0	0	0	0	0	0	0	0	0	0	0	0	0	0	0	0	0	0
162	0	0	-0.0687757909215956	0	0	0	0	0	0	0	0	0	0	-0.0031791326394058	0	0	0	0	0	0	0	0	0	0	0	0	0	0	0	0	0	0	0	0	0	0	0	0	0	0	0	0	0	0	0	0	0	0	0
163	0	0	0	0	0	0	0	0	0	0	0	-0.0504286434694907	0	-0.0504286434694907	0	0	0	0	0	0	0	0	0	0	0	0	0	0	0	0	0	0	0	0	0	0	-0.0504286434694907	0.196850393700787	0	0	-0.0504286434694907	0	0	0	0	0	0	0.196850393700787	0
164	0	0	0	0	0	0	0	0	0	0	0	0	0	0	0	0	0	-0.0434216239687364	0	0	0	0	0	0	0	0	0	0	0	0	0	0	0	0	0	0.0303791140386437	0	0	0	0	0	0	0	0	0	-0.0434216239687364	0	0	0
165	0	-0.042571306939123	0	0	0	0	0	-0.042571306939123	0	0	0	0	0	0	0	0	0	0	0	0	0	0	0	0	0	0	0	0	0	0	0	0	0	0	0	0	0	0	0	0	0	0	0	0	0	0	0	0	0
166	0	0	0	0	0	0	0	0	0.0217291126382035	0	0	0.100438282256464	0	0	0	0	0	0	0	0	-0.0142450142450142	0	0	0	0	0.0644641553732463	0	0	0	0	-0.0637409728318815	0	0.157418339236521	0	0.0393545848091303	0	0	0	0	0	0	0	0	0	0	0	0	0	0
167	0	0	0.0291970802919708	0	0	0	0	0	0	-0.0106923282544774	0	0	-0.0106923282544774	0	0	0	0	0	0	0	0	0	0	0	0	0	0	0	0	0	0	0	0	0	0	0	-0.0106923282544774	0	-0.00534616412723871	0	-0.0106923282544774	0	0	0	0	0	0	0	0
168	0.0239865675221876	0	-0.0621195179525407	-0.0248478071810163	0.0479731350443751	0	0	0	0	0	0	0	0	0	0	0	0	0	0	-0.0124239035905081	0	0	0	0	0	0	0	0	0	0	0	0.0115626639316795	0	0	0.019680369228044	-0.0124239035905081	0	0	0	0	-0.0124239035905081	0	0	-0.0124239035905081	0	0.0471118953855464	0	-0.086967325133557	0
169	0	0	0	0	0	0	0	0	0	0	0	0	0	0	0	0	0	0	0	0	0	0	0	0	0	0	0	0	0	0	0	0	0	0	0	0	0	0	0	0	0	0	0	-0.060864632718749	0	0	0	0	0
170	0	0	0	0	0	0	0	0	0	0	0	0	0	0	0	0	0	-0.0173505682311096	0	0	0	0	0	0	0	0	0	-0.00433764205777739	0	0	0	-0.00433764205777739	0	0	0	0	0	0	0	0	0	-0.00867528411555478	0	0	0	0	0	0	0
171	0	0	0	0	0	0	-0.0212111570686181	0	-0.0212111570686181	0	-0.0424223141372362	0	0	0	0	0	0	0	0	0	0	0	0	0	0	0	0	0	0	0	0	0	0	0	0	0	0	0	0	0.021982853374368	0	0	0	0	0	0	0.133440512857708	0	0
172	0	0	0	0	0	0	0	0	0	0	0	-0.00797893560998963	0	0	0	0	0	-0.00797893560998963	0	0	0	-0.00797893560998963	0	0	0	0	0	0	0	0	0	0	0	0	0	0	0	0	0	0	0	0	0	0	0	0	0	0	0
173	0	0	0	0	0	0	0	0	0	0	0	0	0	0	0	0	0	0	0	0	0	0	0	0	0	0	0	0	0	0	0	0	0	0	0	0	0	0	0	0	0	0	0	0	0	0	0	0	0
174	0	0	0	0	0	0	0	0	0	0	0	0	-0.0961538461538462	0	0	0	0	0	0	-0.0961538461538462	0	0	0	0	0	0	0	0	0	-0.0961538461538462	0.194552529182879	-0.0961538461538462	0.194552529182879	-0.288461538461538	-0.0961538461538462	0	0	-0.093909009278659	1.08463035019455	-0.384615384615385	0.196797366058067	0.194552529182879	0.39583956899132	0.194552529182879	-0.0961538461538462	-0.288461538461538	0	0	0
175	0	0	0	0	0	0	0	0	0	0	0	0	0	0	0	0	0	0	0	0	0	0	0	0	0	0	0	0	0	0	0	0	0	-0.0307787011388119	0	0	0	0	0	0	0	0	0	0	0	0	0	0	0
176	0	0	0	0	0	0	0	0	0	0	0	0	0	0	0.00416371736686514	0	-0.00419137833476539	0	0	0	0	0	0.00416371736686514	0	0	0	0	0	0	0	0	-0.00424670027056593	0	0	-0.00209568916738269	0	0	-0.00212335013528294	0	0	-0.00209568916738269	0	0	0	-0.00419137833476539	0	0	0	0
177	0	0	0	0	0	0	0	0	0	0	0	0	0	0	0	0	0	0	0	0	0	0	0	0	0	0	0	0	0	0	0	0	0	0	0	0	0	0	0	0	0	0	0	0	0	0	0	0	0
178	0	0	0	0.0258564964447317	0	0	0	0	0	0	0	0	0	0	0	0	0	0	0	0	0	0	0	0	0	0	0	0	0	0	0	0	0	0	0	0	0	0.0129282482223659	0	0	0	0	0	0	0	0	0	0	0
179	-0.194685220719597	0	0	0	0	0	0	0.27357727094584	0	0	0	-0.257289879931389	0	0	0.148367952522255	0	0	0	0	0	-0.0857632933104631	0	0	0	0	0	-0.171526586620926	0	0	0	0	0	0	0	0	0	0	0	0.210972611734047	0	0.632917835202142	1.78296033511307	1.81808002198798	0.01628739101445	0	0.421945223468095	-0.108921927409134	-0.0857632933104631	-0.257289879931389
180	0.181738180240899	-0.152439024390244	0	0	0	0	-0.152439024390244	0.27359781121751	0	0	0	0	0	0	-0.015640118781489	0	0	0	0	0	0	0	0	0	0	0	0	-0.0762195121951219	0.27359781121751	0	0	0	0.136798905608755	0	-0.0762195121951219	-0.533536585365854	-0.0762195121951219	0	0	-0.228658536585366	0	0.27359781121751	0	0	0	0.98689149511194	0	0	0
181	0	0	0	0	0	0	0	0	0	0	0	0	0	0	0	0	0	-0.0255036980362153	0	0	0	0	0	0	0	0	0	0	0	0	0.0282885431400283	0	0	0	0	0	0	0	0	0	0	0	0	0	-0.0255036980362153	0	0	0	0
182	0	0	0	0	0	0.0383729854182655	0	0	0	0	0	0	0	0	0	0	0	0	0	0	0	0	0	0	0	0	0	-0.0171320884015762	0	0	0.0767459708365311	0	0	0	0	0	-0.0171320884015762	0	0	0	0	0	0	0	-0.0171320884015762	0	0	0	0
183	-0.0431372549019608	0.0470588235294118	-0.0964705882352941	0.0705882352941176	-0.0564705882352941	-0.0596078431372552	0.03843137254902	-0.213333333333333	0.0470588235294118	-0.106666666666667	-0.123137254901961	-0.0266666666666667	0.021176470588235	-0.0564705882352941	0.0909803921568623	-0.0392156862745095	-0.0933333333333333	0.0572549019607843	-0.106666666666667	-0.0133333333333333	-0.0196078431372549	0.0172549019607843	0.0203921568627451	0.141176470588235	0.0705882352941176	-0.0062745098039215	-0.173333333333333	-0.031372549019608	0.029019607843138	0.040784313725491	-0.632156862745095	-0.192156862745098	0.084705882352941	0.47529411764706	0.22039215686274	0.00156862745097996	0.0243137254901957	-0.051764705882353	-0.0494117647058824	0.061176470588235	0.0235294117647059	0.0878431372549017	-0.0164705882352941	-0.0266666666666667	0	0.0070588235294118	0.0235294117647059	-0.0533333333333333	-0.0933333333333333
184	0	0	0	0	0	0	0	0	0	0	0	0	0	0	0	0	0	0	0.103519440514902	0	0	0	0	0	-0.0967585873246251	0	0	0	0.0506329113924051	0	0	0	0.015775324110647	0	0	0	-0.0219360291010637	0	0	0	-0.0241896468311563	0	0	0	-0.120948234155781	-0.0967585873246251	0	0	0
185	0	0	0	0	0	0	0	0.0173761946133797	0	0	0	0	0	0	0	0	0	0	0	0	0	0	0	0	0	0	0	0	0	0	0	0	0	0	0	0	0	0	0	0	0	0	0	0	0	0	0	0	0
186	-0.0209511837418814	0	0	0	0	0	0	0	0	0	0	0.0323415265200517	0	0	0	0	0	0	0	0	0	0	0	0	0	0	0	0	0	-0.0209511837418814	0.034171028334511	0	0	-0.051463208447474	0	0	0	0	0.070171558483481	-0.0209511837418814	0	0.0113903427781703	-0.102926416894947	0	-0.0209511837418814	0	0.0113903427781703	0	0
187	0	0	0	0	0	0	0	0	0	-0.130293159609121	0	-1.10977029923546	0.259067357512953	0	0	0	0	0	0	0.063627618099272	0	0.0643870989519167	0	-0.130293159609121	0	0.38860103626943	-0.130293159609121	0	0	0.0643870989519167	0	0.129533678756477	0	0	0	0	0	0	0	0	0	0	0	0	0	0	0	0	0
188	0	0.274348422496571	-0.0683526999316473	0	-0.0683526999316473	0	0	0	0	0	0	0	-0.0683526999316473	0	0	0	0	0	-0.0683526999316473	0	0	0	0	0	0	0	0	0	0	0	0	0	-0.136705399863295	0	0	0	0	0	0.137174211248285	0	0	0	0	0	0	0.137174211248285	0	0	-0.205058099794942
189	0	0	0	0.0165972599432681	0	0.734202426217635	0	0	-0.0760456273764259	0.396825396825397	0.198412698412698	0.396825396825397	-0.0760456273764259	0	0	-0.0760456273764259	0.595238095238095	0.122367071036272	-0.15133683384634	0	-0.152091254752852	0	-0.532319391634981	0	0	0	0	0	0	0	0	-0.0760456273764259	0	0	0	0	0	0	0	0	-0.0760456273764259	0	0	0	0	0	0	-0.0760456273764259	0
190	0	-0.00871839581517001	0	0	0	-0.01743679163034	0	0	0.0171940077669013	0.0156445556946183	0.0102678478874531	0.00692615987944829	-0.04359197907585	0	0	0	-0.027126322899265	-0.00871839581517001	0.0625782227784731	0.0225707155740665	0	0	0.0328385634615195	0	-0.00871839581517001	0.0156445556946183	0	0	0	0	0	0	0	0	-0.0279474233812317	0	-0.00871839581517001	0	0	0	0	0	0	0.0138523197588965	0	0.0225707155740665	0.0156445556946183	0	0
191	-0.0628193356843068	-0.0018762951309898	0.0196889151407757	0.0146253550340267	-0.138953056557871	-0.0183779452960063	-0.0133143851892573	-0.0825082508250825	0.0076854997962879	0.0311270051990432	0.0425650952573107	-0.0247524752475248	0.0196889151407757	-0.0165016501650165	0.0984445757038787	-0.010127120213498	0	0.0705048354805947	-0.033003300330033	0.0013109698447694	-0.033003300330033	-0.0183779452960063	-0.0247524752475248	0.0622540103980865	0.0063745299515185	0.0095617949272777	0.0654412753738457	-0.0412541254125413	-0.0050635601067491	0	0	0.0114380900582675	0	-0.00825082508250825	-0.0165016501650165	-0.00825082508250825	0	0	0	0	-0.0247524752475248	0	0.0196889151407757	0	0	0	0	0	0
192	0	0	0	0	0	0	0	0	0	0	0	0	0	-0.0280112044817927	0	0	0	0	0	-0.0355306056848969	0	0	0	0	0	0	0	0	0	0	0	0	0	0	0	0	0	0	0	0	0	0	0	0	0	0	-0.0280112044817927	0	0
193	0	0	0	0	0	0.0149706450276351	0	0	0	0	0	0	0	0	0	0	0	0	0	0	0	0	0	0	0	0	0	0	0	0	0	0	0	0	0	0	0	0.0514005175230813	0	0	0.0963124526059864	0	0	0.0364298724954463	0	0.218579234972678	0	-0.0214592274678112	0
194	0	0	0	0	0	0	0	0	0	0	0	0	0	0	0	0	0	0	0	0	0	0	0	0	0	0	0	0	0	0	0	0	0	0	0	0	0	0	0	0	0	0	-0.0152183838076396	0	0	0	0	0	0
195	0	0	0	0	0	0	0	0	0	0	0	0	0	0	0	0	0	0	0	0	0	0	0	0	0	0	0	0	0	0	0	0	0	0	0	0	0	0	0	0	0	0	0	0	0	0	0	0	0
196	0	0	0	0	0	0	0	0	0	0	0	0	0	0	0	0	0	0	0	0	0	0	0	0	0	0	0	0	0	0	0	0	0	0	0	0	0	0	0	0	0	0	0	0	0	0	0	0	0
197	0	0	0	0	0	0	0	0	0	0	0	0	0	0	0	0	0	0	0	0	0	0	0	0	0	0	0	0	-0.13271400132714	0	0	0	0	0	0	0	0	0	0	-0.06635700066357	0	0	0.196078431372549	0	0	0	0	0	0
198	0	0	0	0	0	0	0	0	0	0	0	0	0	0	0	0	0	0	0.0134861766689144	0	0	0	0	0	0	0	0	0	0	0	0	0	0	0	0	0	0	0	0	0	0	0	0	0	0	0	0	0	-0.00483418737310258
199	0	0	0	0	-0.00705218617771509	0	0	0	0	0	0	0	0	0	0	0	0	0	0	0	0	0	0	0	0	0	0	0	0	0	0	0	0	0	0	0	0.013728720483251	0	0	0	0	0	0	0	0	0	0	0	0
200	0	0	0	0	0	0	0	0	0	0	0	0	0	0	0	0	0	0	0	0	0	0	0	0	0	0	0	0	0	0	0	0	0	0	0	0	0	0	0	0	0.00050671109855469	0	0	0	0	0	0	0	0
201	0	0	0	0	0	0	0	0	0	0	0	0	0	0	0	0	0	0	0	0	0	0	0	-0.0043010752688172	0	0	0	0	0	0	0	0	0	0	0	0	0	0	0	0	0	0	0	0	0	0	-0.0043010752688172	0	0.0102061645233721
202	0	0	0	0	0	0	0	0	0	0	0	0	0	0	0	0	0	0	0	0	0	0	0	0	0	0	0	0	0	0	0	0	0	0	0	0	0	0	0	0	0	0	0	0	0	0	0	0	0.030902348578492
203	0	0	0	0	0	0	0	0.013910140492419	0	0	0	0	0.013910140492419	0	0	0	0	-0.0135016539526092	0	-0.0265948213654086	0	0	0.0652507947246492	0	0	0	-0.0599404697071219	-0.0067508269763046	0	0	0.013910140492419	0	0	0	0	-0.0540066158104368	0	-0.0067508269763046	0	0	0	0	0	0	0.013910140492419	0	0	0	-0.0135016539526092
204	0	0	0	0	0.051559680329982	0	0	0	0.025779840164991	0	0	0	0	0	-0.151351351351351	0	0	0	0	0	0.025779840164991	0	0	0	0	0	0	0	-0.0216216216216216	0	0	0	0	0	0	0	-0.096463981382775	0	0	0	0	-0.0432432432432432	0	0	0	0	0	0	-0.082328267943117
205	0	0	-0.00560852495793606	0	-0.00560852495793606	0	0	0	0	0	0	0	0	-0.00560852495793606	0	0	0.0139705254581187	0	0.0195790504160548	-0.00560852495793606	0.0195790504160548	-0.00560852495793606	-0.00142752470784469	0	0	0	0	0	0	0.00978952520802741	0	0.00418100025009135	0	0	0	-0.00560852495793606	0	0	0	-0.00560852495793606	-0.0168255748738082	0	0	0	0	0	0	-0.0112170499158721	0
206	0	0	0	0	0	0	0	0	0	0	0	0	0	0	0	0	0	0	0	0	0	0	0	0	0	0	0	0	0	0	0	0	0	0	0	0	0	0	0	0	0	-0.0125376128385155	0	0	0	0	0	0	0
207	0	0	0	0	0	0	0	0	0	0	0	0	0	0	0	0	0	0	0	0	0	0	0	0	0	0	0	0	0	0	0	0	0	0	0	0	0	0	0	0	0	0	0	0	0	0	0	-0.0255819902788437	0
208	0	-0.00476838340997199	-0.0551065393093314	0.0272009260529436	-0.0231372298464158	0	-0.0183688464364438	0.0319693094629156	0.0408013890794154	-0.091844232182219	-0.051747530306248	0.0319693094629156	0.0408013890794154	0.378158642941571	0.351662404092072	0.144836709881218	-0.092548919385664	0.0272009260529436	-0.0326739966663602	-0.0551065393093314	-0.02384191704986	-0.0734753857457752	-0.0143051502299162	-0.14695077149155	0.163910243521106	0.130531559651302	0.071361324135443	0.177510706547577	0.0319693094629156	0.0591702355158592	0	0.0319693094629156	0	0	0	0	0	0	-0.0183688464364438	0	0	0	0	0	0	0	0	0	0
209	0	0	0	0	-0.575364375276618	0	-0.0857632933104631	-0.171526586620926	-0.0857632933104631	0	-0.0857632933104631	0	-0.171526586620926	-2.65866209262436	0	-0.171526586620926	0	0	0	0	0	-0.257289879931389	0.0249786778966239	0	0	0	0	-0.257289879931389	0	0.110741971207087	0	-0.171526586620926	0	0	0	0.110741971207087	-0.0857632933104631	0	0	0	0	0	0	0	0	0	-0.343053173241852	0	-0.257289879931389
210	0	0	0	0	0	0	0	0	0	0	0	0	0	0	0	0	0	0	0	-0.0151034586920405	0	0	0	0	0	0	0	0	0	0	0	-0.030206917384081	0	0	0	0	0	0	0	0	0	0	0	0	0	0	0	0	0
211	0	0	0	0	0	0	0	0	0	0	0	0	0	0	0	0	0	0	0	0	0	0	0	0	0	0	0	0.0960614793467819	0	0	0	0	0	0	0	0	0	0	0	0	0	0	0	0	0	0	0	0	0
212	0	0	0	0	0	0	0	0	0	0	0	0	0	0	0	0	0	0	0	0	0	0	0	0	0	0	0	0	0.00519642485969653	0	0	0	0	0	0	0	0	0	0	0	0	0	0	0	0	0	0	0	0
213	0	0	0	0	0	0	-0.0116658889407373	0	0	0	0	0	-0.0583294447036864	-0.0116658889407373	-0.0144553496488347	0	0	-0.0116658889407373	-0.0233317778814746	0.0205423171733772	-0.0233317778814746	0	-0.0116658889407373	-0.0349976668222119	0.0616269515201315	0	0.029418745406017	0	0	0	0.0088764282326399	0	0	-0.0349976668222119	0	0	-0.0116658889407373	0	0.0205423171733772	-0.0349976668222119	0.0616269515201315	0	-0.0116658889407373	0	0	0	0	0	0
214	0.580262192546261	0	0.193050193050193	3.67684657511913	0.0970809032229377	0	1.0623318684739	0	0	0.193050193050193	0.387211999496068	0.386100386100386	0	0	0	1.93161354389761	0	0	0	1.65259858158131	-0.0959692898272553	0	0.001111613395682	-0.26345237477675	-0.094857676431573	0	0.386100386100386	-0.0959692898272553	0.193050193050193	0.002223226791365	-0.187492126071781	0	0.193050193050193	0	0	0	0	-0.191938579654511	-1.62258501989788	-0.0959692898272553	0	-0.575815738963532	0	0	0	0	0	-2.86907417425651	-0.383877159309021
215	0	0.0164473684210526	0	0	0.0328947368421053	0	0	0	0	0	0	0	-0.00911244760342628	0	0	0	0	0	0	0	0	0	0	0	0	0	0	0	-0.00911244760342628	0.0493421052631579	0	0	0	-0.00911244760342628	0	0	0	0	0	0	0	0	0	0	0	0	0	0	0
216	0	0	0	-0.0312891113892365	0	0	0	0	0	0	0	0	0	0	0	0	0	0	0	0	0	0	0	0	0	0	0	0	0	0	0	0	0	0	0	0	0	0	0	0	0	0	0	0	0	0	0	0	0
217	-0.597604351919654	-0.395569620253165	-0.712025316455696	-0.0791139240506329	0.206611570247934	-0.237341772151899	0.096767444293336	-0.158227848101266	0	0	-0.0791139240506329	0	0	0.206611570247934	0	0	0	0	0	0	0	0.206611570247934	0	0	0	0	0	0	0	0	0.206611570247934	0	0	0	-0.0791139240506329	0	0	0	0	0.413223140495868	0	0	0	0	0	0	0	0	0
218	0	0	0	0	0	0	-0.0900900900900901	0	0	0	0	0	0	0	0	0	0	0	0	0	0	0	0	0	0	0	0	0	-0.0900900900900901	0	0	0	0	0	0	0	0	0	0	0	0	0	0	0	0	0	0	0	0
219	0	0	0	0	0	0	0	0	0	0	0	-0.0342407122068139	-0.0171203561034069	0	0	0	-0.0171203561034069	0	0.0458715596330275	-0.0171203561034069	0.223868289487944	0	0	0	0.223868289487944	0.0917431192660551	0	0.137614678899083	0.212237442061731	0	0	0	-0.0342407122068139	0.0458715596330275	0	0.0116308474262136	0	-0.0342407122068139	0.0458715596330275	0	0	0.0287512035296206	0.275229357798165	0	0	0	0	-0.0171203561034069	0.149245526325296
220	0	0	0	0	0	0	0	0	0	0	0	0	0	0	0	0	0	0	0	0	0	0	0	0	0	0	0	0	0	0	0	0	0	0	0	0	0	0	0	0	0	0	0	0	0	0	0	0	0
221	0	0	0	0	0	0	0	0	0	0	0	0	0	0	0	0	0	0	0	0	0	0	0	0	0	0	0	0	0	0	0	0	0	0	0	0.119617224880383	0	0	0	0	0	0	0	0	0	0	0	0	0
222	0	0	0	0.00811556565492615	0	0	0	0	0	0	0	0	0	0	0	0	0	0	0	0	-0.00589657409045345	0	0	0	0	0	0	0	0	-0.00589657409045345	0	0	0	0	0	0	0	0	0	-0.00957415661643415	0	0	-0.0117931481809069	0	-0.00957415661643415	0	0	0	0
223	0	-0.0131299124294927	0	0	0	-0.0111890198418619	0	0	0	-0.00372967328062062	0	0	0	0	0	0	0	0	0	0	0	0	0	0	0	0	0	0	0	0	0	0	0	0	0	0	0	0	0	0	0	0	0	0	0	0.00178878069298978	0	0	0
224	0	0	0	0	0	-0.0186358553857622	0.0434216239687364	0	0.0434216239687364	-0.0372717107715244	0	0	0	0	0	0	0	-0.0186358553857622	0	0.0434216239687364	0	0	0	0	0	-0.0186358553857622	0	0	0	0	0	0	0	-0.0186358553857622	0	0	0	0	0	0	0	0	0	0	-0.0372717107715244	0.0434216239687364	0	0	0
225	-0.0049465261769213	0	-0.00348225789601978	-0.0139290315840791	-0.0049465261769213	0	-0.0174112894800989	0.00403597923023644	0	0	-0.0104467736880593	-0.00696451579203956	-0.0174112894800989	0.005500247511138	0.00403597923023644	0.00201798961511822	-0.0174112894800989	0	0	-0.00348225789601978	-0.0208935473761187	-0.00696451579203956	0	0	0	-0.00348225789601978	0	-0.00696451579203956	0	-0.00348225789601978	0	0.0130184846373942	0	0	-0.00146426828090156	0	0.00201798961511822	-0.0174112894800989	0.02750123755569	-0.00348225789601978	-0.0287686101148431	-0.0197861047076854	-0.00696451579203956	0	0	0.011000495022276	0	0	0.016500742533414
226	0	0	0	0	0	0	0	0	0	0	0	0	0	0	0	0	0	0	0	0	0	0	0	0	0	0	0	0	0	0	0	0	0	-0.0564971751412429	0	0	0	0	0	0	0	0	0	0	0	0	0	0	0
227	0	0	0.0125580811252041	0	0	0	0	0	0	0	0	0	0	0	0	0	0	0	0	0	0	0	0	0	0	0	0.0125580811252041	0	0	0	0	0	0	0	0	0	0	0	0	0	0	0	0	0.0251161622504081	0	0	0	0	0
228	0	0	0	0	0	0	0	0	0	0	0.186742231360676	0	0.0287935502447452	0	0	0	0.0287935502447452	0	0	0	0	0	0.143967751223726	0	0.144641633750562	0	0	0.140483181448884	0.0575871004894904	0	0	0	0	0	0.0287935502447452	0.171097920547799	0.294431218196637	0.0139809298922048	0	0	0.129155130871186	0.0287935502447452	-0.0296252407050807	1.16889189358985	0.115174200978981	0.0287935502447452	0.775604667753946	0.0287935502447452	0
229	0	0	0	0	0	-0.00899847026005579	0	0	0.0264329625025002	0.0054131258084097	0.0186296070596597	0.00660824062562501	0	-0.00899847026005579	0	0	0	0	0	0	-0.00899847026005579	0	0	0.00780335544284042	0	0	0	0	0	0	0	0	0	0	0	0	0	0	0	0	0	0	0	-0.00899847026005579	0	0.00780335544284042	0	0	0
230	0	0	0	0	0	0	0	0	0	0	0	0	0	0	0	0	0	0	-0.0296120817293456	0	0	0	0	0	0	0	0	0	0	0	0	0	0	0	0	0	-0.0592241634586911	0	0	0	0	0	0	0	0	0	0	0	0
231	0	0	0	0	0	0	0	0	0	0	0	0	0	0	0	0	0	0	0	0	0	0	0	0	0	0	0	0	0	0	0	0	0	0	0	0.0116536534203473	0	-0.011912228261442	0	0	0	0	0	0	0	0	0	0	-0.0117398450340455
232	0	0	0	0	0	0	0	0	0	0	0	0	0	0	0	0	0	0	0	0	0	0	0	0	0	0	0	0	0	0	0	0	0	0	0	0	0	0	0	0	0	0	0	0	0	0	0	0	0
233	0	0	-0.200066688896299	0	0	0	0	0	0	-0.303014681780207	-0.133377792597533	-0.0333444481493831	0	-0.233411137045682	0	0	0	-0.234868461263561	0.227581840174166	0	0.195694716242661	-0.168179564964795	0.540623782617691	-0.10020735330999	0.129005819943895	-0.102947992883908	-0.200066688896299	0.162350268093278	0	0.875525588329398	0.410160638455911	0.0971186960123909	0	-0.0014573242178792	0.666714954125822	-0.0333444481493831	0	0	-0.0666888962987663	-0.60346273284833	-0.0666888962987663	0	0	0	0	-0.071060868952404	0	0	-0.87715692140912
234	0	0	0	0	0	0	0	0	0	0	0	0	0	0	0	0	0	0	0	0	0	0	0	0	0	0	0	0	0	0	0	0	0	0	0	0	0	0	0	0	0	0	0	0	0	0	0	0	0
235	0	0	0	0	0	0	0	0	0	0	0	0	0	0	0	0	0	0	0	0	0	0	0	0	0	0	0	0	0	0	0	0	0	0	0	0	0	0	0	0	0	0	0	0	0	0	0	0	0
236	0	0	0	0	0	0	0	0	0	0	0	0	0	0	0	0	0	0	0	0	0	0	0	0	0	0	0	0	0	0	0	0	0	0.0119246362985929	0	0	0	0	0	0	0	0	0	0	0	0	0	0	0
237	-0.080197810313944	-0.016492954026055	-0.170711930516696	-0.044222143663486	-0.37670958339192	-0.714026633163848	-0.405588680182566	0.55662077113431	-0.25961618070496	-0.107237055659449	0.419584692961645	-0.197521194431558	-0.27656909759229	0.0126161241952201	0.292404961816516	-0.0240494867471499	-0.37417978765486	0.52958152578881	-0.62991913852899	0.26927540079193	0.10382018868991	0.17304459931321	0.35955953956403	0.0410352581245899	0.48558936355596	0.093043915939816	-0.0882143058963299	-0.378319453406419	0.12123306843853	-0.179418370391008	0.0481318279844001	-0.125569861130641	-0.170481949086054	-0.178958407529723	-0.42392148565376	0.46610665093156	-0.351280208060916	-0.323780999854125	-0.30337836150716	0.29355486896973	-0.098070652923852	-0.405358698751922	-0.305908157244219	0.57472359517486	-0.0146531025809098	-0.87396229093045	-0.32972766256073	0.62147553457541	-0.0579553205218302
238	0	0	0	0	0	0	0	0	0	0	0	0	0	0	0	0	0	0	0	0	0	0	0	0	0	0	0	0	0	0	0	0	0	0	0	0	0	0	0	0	0	0	0	0	0	0	0	0	0
239	0	0	0	0	0	0	-0.00906180148613544	0.00501454217229967	-0.00906180148613544	0	0	0	0	0	0	0	0	-0.00604120099075696	0	-0.00302060049537848	0	0	0	0	0	0	0	0	0	0	0	0	0	-0.00604120099075696	0	0	0	0.00199394167692119	-0.00604120099075696	0	0	0	0	-0.00302060049537848	0	0	-0.00302060049537848	0	0
240	0	0	0	0	0.0372717107715244	0	0	0	0	0	0	0	0	0	0	0	0	0	0	0	0	0	0	0	0	0	0	0.0372717107715244	0	0	0	0	0	0	0	0	0	0	0	0	0	0	0	0	0	0	0	-0.0243546030199708	0
241	0	0	0	0	0	0	0	0	0	0	0	0	0	0	0	0	0	0	0	0	0	0	0	0	0	0	0	0	0	0	0	0	0	0	0	0	0	0	0	0	0	0	0	0	0	0	0	0	0
242	0	0	0	0	0	0	0	0	0	-0.0412371134020619	0	0	0	0.305122672420682	0	0	0	-0.0412371134020619	0	0.111324222808279	-0.0412371134020619	0	0	0	0.098937105410373	0	0	0.581395348837209	0	0	0	0	0	0	0	0	-0.0412371134020619	0	0	0	0	0	0	-0.0412371134020619	0	0	0	0	0
243	0	-0.0834028356964137	0	0	0	0	0	0	0	0	0	0	0	0	0	0	0	0	0	0	0	0	0	0	0	0	0	0	0	0	0	0	0	0	-0.166805671392827	0	-0.0834028356964137	0	0.724589715415405	0	0	0.396825396825397	0	0	0	0	0	0	0
244	0	0	0	0	0	0	0	0	0	0	0	-0.0122970978848992	0	0	0	0	0	0	0	0	0	0	0	0	0	0	0	0	0	0	0	0	0	0	0	0	0	0	0	0	0	0	0	0	0	0	0	0	0
245	0	0	0	0	0	0	0	0	0	0	0	0	0	0	0	0	0	0	0	0	0	0	0	0	0	0	0	0	0	0	0	0	0	0	0	0	0	0	0	0	0	0	0	0	0	0	0	0	0
246	0	0	0	0	0	0	0	0	0	0	0	0	0	0	0	0	0	0	0	0	0	0	0	0	0	0	0	0	0	0	0	0	0	0	0	0	0	0	0	0	0	0	0	0	0	0	0	0	0
247	0	0	0	0	0	0	0	0	0	0	0	0	0	0	0	0	0	0	0	0	0	0	0	0	0	0	0	0	0	0	-0.00814929508597506	0	0	0	0	0.0132685674113477	0	0	0	0.0428357249946455	0	0	-0.00814929508597506	0	0	0	0	0	0
248	0.250984633717842	0	0	0	0.0218186255868378	0	-0.00976467141880676	0	0	0	0	0	0	0	0	0	0	0	0	0	0	0	0	0	0	-0.00976467141880676	0	0	0	-0.00976467141880676	0	0	0	0	0	0	0	0	0	0	0	0	0.012053954168031	0	0	-0.0195293428376135	0	0	0
249	0	0	0	0	0	-0.0433463372345037	0	0	0	0	0	0	0	0	0	-0.0216731686172518	0	0	0	0	0	0	0	0	0	0	0	0	0	0	0	0	0	0	0	0	0	0	0	0	0	0	0	0	0	0	0	0	0
250	0	0	0	0	0	0	0	0	0	0	0	0	0	0	0	0	0	0	0	0	0	0	0	0	0	0	0	0	0	0	0	0	0	0	0	0	0	0	0	0	0	0	0	0	0	0	0	0	0
251	0	-0.0211685012701101	0.03725782414307	0	0	0	0	0	0	-0.0635055038103302	0	0	0	0	0	0	-0.0211685012701101	0	0	0	0	0	0	0	0	0	0	0	0	0.03725782414307	0	0	0	0	0	0	0	0	-0.0211685012701101	0.03725782414307	0	0	0	-0.0846740050804403	0.0160893228729599	0	0.03725782414307	0	-0.0211685012701101
252	0	0	0	0	0	0	0	0	0	0	0	0	0	0	0	0	0	0	0	0	0	0	0	0	0	0	0	0	0	0	0	0	0	0	0	0	0	0	0	0	0	0	0	0	0	0	0	0	0
253	0	0	0	-0.0831946755407654	0	-0.0831946755407654	0	0	0	0	0	0	0	0	0	-0.0831946755407654	0	0	0	0	0	0	0	0	0	0	0	0	0	0	0	0	0	0	0	0	0	0	0	0	0	0	0	0	0	0	0	0	0
254	0	0	0	0	0	0	0	0	0	0	-0.00800704620065658	0	0	0	0	0	0	0	0	0	0	0	0	0	0	0	0	0	0	0	0	0	0	0	0	0	0	0	0	0	0	0	-0.00800704620065658	0	0	0	0	0	0
255	0	-0.0408830744071954	0	0.061050061050061	-0.204415372035977	0	0	-0.122649223221586	0	0	0	-0.0817661488143908	0	0.061050061050061	0	-0.0817661488143908	0	0	0	0	0	0	-0.122649223221586	0	0	0	-0.0408830744071954	0	0	0	0.061050061050061	-0.0408830744071954	0.061050061050061	-0.163532297628782	0.061050061050061	0	0	0	0	-0.0817661488143908	-0.000549101121464002	-0.0408830744071954	0	0	-0.0408830744071954	0	0	0	0
256	0	0	0	0	0	0	0	0	0	0	0	0	0	0	0	0	0	0	0.0847457627118644	0	0	-0.0493827160493827	0	0	0	0	0	0	0	0	0	0	0	0	0	0	0	0	0	0	0	0	0	-0.0493827160493827	0	0	0	0	0
257	-0.00645034958591001	0.0742942050520059	-0.045210039508391	0	0.106603545388576	0.442540055519081	-0.271317829457364	-0.193798449612403	-0.174389808447654	0.177672575647627	-0.158263934482878	-0.00645034958591001	0.281050946243247	0.209981915984197	0.216432265570108	-0.374638607645967	-0.442482463112063	-0.119504244560397	0.109828720181531	-0.24868401349966	0.245516431113722	-0.3133026941728	0.255191955492588	-0.0387596899224806	-0.0807445546379161	-0.164714284068788	-0.158263934482878	0.067843855466096	0.407005540389555	-0.116279069767442	0.222882615156018	-0.051660389094302	-0.116279069767442	0.248741605906678	0.022633815957704	0.067843855466096	-0.093645253809737	-0.271317829457364	-0.193798449612403	-0.061335913473167	-0.090420079016782	-0.200248799198314	-0.235783314327839	0.37147102526003	-0.048435214301346	0.4037803655966	0.148588410104012	0.126012186553324	0.209981915984197
258	0	0	0	0	0	0	0	0	0	0	0	0	0	0	0	0	0	0	0	0	0	0	0	0	0	0	0	0	0	0	0	0	0	0	0	0	0	0	0	0	0	0	0	0	0	0	0	0	0
259	0	0	0	0	0	0	0	0	0	0	0	0	0	0	0	0	0	0	0	0	0	0	0	0	0	0	0	0	0	0	0	0	0	0	0	0	0	0	0	0	0	0	0	0	0	0	0	0	0
260	0	0	0	0	0	0	0	0	0	0	0	0	0	0	0	0	0	0	0	0	0	0	0	0	0	0	0	0	0	0	0	0	0	0	0	0	0	0	0	0	0	0	0	0	0	0	0	0	0
261	0	0	0	0	0	0	0	0	0	0	0	0	0	0	0	0	0	0	0	0	0	0	0.104384133611691	0	0	0	0	0	0	0	0	0	0	0	0	0	0	0	0	-0.119904076738609	0	0.104384133611691	0	0	0	0	0	0	0
262	0	0	0	0	0	0	0	0	0	0	-0.014421690222094	0	0	0	0	0	0	0	0	0	0	0	0	0	0.0217580504786771	0	0	0	0	0	0	0	0	0	0	0.0652741514360313	0	0	0	0	0	0	0.0435161009573542	0	0	0	0	0	0
263	0	0	0	0	0	0	-0.0890967813787727	0	0	0	-0.0111370976723466	0	0	0	0	0	0	0	0	0	0	0	0	0	0	0	0	-0.0111370976723466	0	0	0	0	0	0	0	0	0	0	0	0	0	0	0	0	-0.0111370976723466	0	0	0	0
264	0	0	0	0	0	0	0	0	0	0	0	0	0	0	0	0	0	0	0	0	0	0	0.13869625520111	0	0	0	0	0	0	0	0	0	0	-0.0749625187406297	0	0	0	0	0	0	-0.0749625187406297	0	0	0	0	0	0	0	0
265	-0.0831255195344971	-0.0415627597672485	0	-0.0415627597672485	0	-0.0831255195344971	0	0	0.123076923076923	0	-0.0415627597672485	0	0	0	0	0	0	0	0	0	0	-0.0831255195344971	0	0	0	0	-0.0415627597672485	0	0	0	-0.0415627597672485	0	0	0	0	0	0	0	0.123076923076923	0	0.0615384615384615	0	0	0	0	0	0	0	0.0815141633096745
266	0	0	0	0	0	0	0	0	0	0	0	0	0	0.165289256198347	0	0	0	0	0	0.165289256198347	0	0	0	-0.169491525423729	0	0	0	0	0	0	0	0	0	0	0	0	0	0	0	0	0	0	0	0	0	0	0	0	0
267	0	-0.0240124864929763	0	0	0	0	0	0	-0.0240124864929763	0	0	0	-0.0120062432464882	0	0	0	0	0.010539629005059	-0.0120062432464882	0	0	0.010539629005059	0	0	-0.0240124864929763	0	-0.06149783047387	0	0	0	-0.0120062432464882	0	0	0	0	0	-0.0120062432464882	0	0.0526981450252951	-0.0360187297394645	-0.0298789434586929	0	-0.0120062432464882	-0.0360187297394645	0	0	-0.0164060859707756	0	0
268	0	0	0	-0.00601684717208183	0	0	0	0	0	0	0	0	0	0	0	0	0	0	0	0	0	0	0	0	0	0	0	0	0	0	0	0	0	0	0	0	0	0	0	0	0	0	0	0	0	0	0	0	0
269	0	0	0	0	0	0	0	0	0	0	0	0	0	0	0	0	0	0	0	0	0	0	0	0	0	0	0	0	0	0	0	0	0	0	0	0	0	0	0	0	0	0	0	0	0	0	0	0	0
270	0	0	0	0	0	0	0	0	0	0	0	0	0	0	0	0	0	0	0	0	0	0	0	0	0	0	0	0	0	0	0	0	0	0	0	0	0	0	0	-0.0179694519317161	0	0	0	-0.0179694519317161	0	0	0	0	0
271	0	-0.019723264495647	0	0	0	0	-0.44477390659748	0	0	0	0	-0.019723264495647	0	0	-0.148257968865827	0	0.38560411311054	0	0	0	0	0	0	0	0	-0.0741289844329133	0	0	0	0	0	0	0	0	0	0	0.0544057199372667	0	0	-0.148257968865827	0.12853470437018	-0.0741289844329133	0	0.12853470437018	-0.148257968865827	0.400563304056514	0	0.25706940874036	-0.22238695329874
272	0	0	0	0	0	0	0	0	0	0	0	0	0	0	0	0	0	0	0	0	0	0	0	0	0	0	0	0	0	0	0	0	0	0	0	0	0	0	0	0	0	0	0	0	-0.0564971751412429	0	0	0	0
273	0	0	0	0	0	0	0	0	0	0	0	0	0	0	0	0	0	0	0	0	0	0	0	0	0	0	0	0	0	0	0	0	0	0	0	0	0	0	0	0	0	0	0	0	0	0	0	0	0
274	0	0	0	0.239520958083832	0	0.885462191086237	0	0	0	0.119760479041916	0.286659795876657	0.88798437982423	-0.050965606912537	0	0	0	0	-0.48034649654938	0	-0.145243282498184	0	-1.92260359455381	-0.170726085954453	0	0	0.141416513378472	0	-0.149070051617897	-0.145243282498184	-1.61941911384203	-0.0726216412490922	0.479041916167665	-0.0726216412490922	0.598802395209581	0.286659795876657	0	0.119760479041916	0	0	0	0.184728582051583	-0.145243282498184	0	0	-0.32110071795407	0	0	-0.101931213825073	0
275	0	0	0	-0.0421762969211303	0	0	0	0	0	0	0	0.0763941940412529	-0.126528890763391	0	0	0	0	0	0	0	0	0	0	0	0	0	0	0	0	0	0	0	0	0	0	0	0	0	0	0	0	0	0	0	0	0	0	0	0
276	0	0	0	0	0	0	0	0	0	0	0	0	0	0	0	0	0	0	0	0	0	0	0	0	0	0	0	0	0	0	0	0	0	0	0	0	0	0	0	0	0	0	0	0	0	0	0	0	0
277	0	0	0	0	0	0	0	0	0	0	0	0	0	0	0	0	0	0	0	0	0	0	0	0	0	0	0	0	0	0	0	0	0	0	0	0	0	0	0	0	0	0	0	0	0	0	0	0	0
278	0	0	0	0	0	0	0	0	0	0	0	0	0	0	0	0	0	0	0	0	0	0	0	0	0	0	0	0	0	0	0	0	0	0	0	0	0	0	0	0	0	0	0	0	0	0	0	0	0
279	-0.0326797385620915	0	0.0307692307692308	-0.0163398692810458	0	0	0	-0.0326797385620915	0	-0.0163398692810458	0	0	0	0	0.0307692307692308	0	0	0	0	0	0	0	0	0.0615384615384615	0	0.014429361488185	0.0615384615384615	0	-0.0326797385620915	-0.0163398692810458	0	0	0	-0.0163398692810458	0	0	-0.050930115635998	0.0451985922574157	0	0	0.0307692307692308	0	0	0	0	0	0	0	-0.0163398692810458
280	0	0	0	0	0	0	0	0	0	0	0	0	0	0	0	0	0	0	0	0	0	0	0	0	0	0	0	0	0	0	0	0	0	0	0	0	0	0	0	0	0	0	0	0	0	0	0	0	0
281	0	0	0	0	0	0	0	0.00506354752139349	0	0	0	0	0	0	0	-0.00271983028259037	0	0	0	0	0	0	0	0	0	0	-0.00271983028259037	0	-0.00271983028259037	0	0	0	0	0	0	0	0	0	0	0.010127095042787	0	0	0	0	0	0	0	0	-0.00271983028259037
282	0	0	0	0	0	0	0	0	0	0	0	0	-0.00700133025274802	0	0	0	-0.00700133025274802	0	0	0	0.0401687085760193	0	-0.014002660505496	-0.0210039907582441	-0.00700133025274802	0	0	0	0	0	0	-0.00700133025274802	0.0200843542880096	0	0	0	-0.00700133025274802	0	0	0.0331673783232713	0	-0.014002660505496	0	-0.0210039907582441	0.0060816937825136	0	0	0	0
283	0	0	0	0	0	0	0	0	0	0	0	0	0	0	0	0	0	0	0	0	0	0	0	0	0	0	0	0	0	0	0	0	0	0	0	0	0	0	0	0	0	0	0	0	0	0	0	0	0
284	0	0	0	0	0	0	0	0	0	0	0	0	0.168010752688172	0	0	0.0336021505376344	0	0	0	0	0	0	0	0	0	0	-0.0243546030199708	-0.0487092060399415	-0.230910443149024	-0.0243546030199708	-0.0151070555023071	0	0.0672043010752688	-0.0243546030199708	0	-0.146127618119825	-0.0302141110046143	0	0	-0.0730638090599123	0.0092475475176636	0	-0.0243546030199708	0.0672043010752688	0	0	0	-0.219191427179737	0
285	0	0	0	0	0	0	0	0	0	0	0	0	0	0	0	0	0	0	0	0	0	0	0	0	0	0	0	0	0	0	0	0	0	0	0	0	0	0	0	0	0	0	0	0	0	0	0	0	0
286	0	0	0	0	0	0	0	0	0	0	0	0	0	0	0	0	0	0	0	0	0	0	0	0	0	0	0	0	0	0	-0.0148588410104012	0	0	0	0	0	0	0	0	0	0	0	0	0	0	0	0	0	0
287	0	0	0	0	0	0	0	0	0	0	0	0	0	0	0	0	0	0	0	0	0	0	0	0	0	0	0	0	0	0	0	-0.0425525304138315	0	-0.019743922176747	0	0	0	0	0	0	0	0	0	-0.0196309383588536	0	0	0	0	0
288	0	0	0	0	0	0	0	0	0	0	0	0	0	0	0	0	0	0	0	0	0	0	0	0	0	0	0	0	0	0	0	0	0	0	0	0	0.172916352407741	0.419147463597725	0	0	0	0	0	0	0	0	0	0	0
289	0	0	0	0	0	0	0	0	0	0	0	0	0	0	0	0	0	0	0	0	0	0	0	0	0	0	0	0	0	0	0	0	0	0	0	0	0	0	0	0	0	0	0	0	0	0	0	0	0
290	0	0	0	0	0	0	0	-0.185528756957328	0	0	0	0	0	0	0	0	-0.0927643784786642	0	0	0	0	0	0	0	0	0	0	0	0	0	0	0	0	0	0	0	0	0	0	0	0	0	0	0	0	0	0	0	0
291	0	0.027882336539802	0	0	0	0	0	0	0	0	0	0	0	0	0	0	0	0	0	0	0	0	0	0	0	0	0	0	0	0.003820735115362	-0.030361299463617	0	0	0	0	0	0	0	0	0	0	0	0	0	0	0	0	0	0
292	0	0	-0.0106236056517582	0	0	-0.0106236056517582	0	-0.0106236056517582	0	0	0	0	0	0	0	0	0	0	0	-0.0106236056517582	0	0	0	0	0.0194401244167963	0	0	0	0	-0.0106236056517582	0	0	0	0	0	0	0	0	-0.0106236056517582	0	0	0	0	0	0	0	0	0	0
293	0	-0.120409391932571	0	0	0	0.112866817155756	0	0	0	0	0	0	0	0	0	0	0	0	0	0	0	0	0	0	0	0	0	0	0	0	0	0	0	0	0	0	0	0	0	0	0	0	0	0	0	-0.120409391932571	0	0	0
294	0	0	0	0	0	0	0	0	0.241305367748715	0	0	0	0	0	0	0	0	0	0	0	0	0	0.0679809653297077	0	-0.150532253908283	0	0	0	0	0	-0.0612369871402327	0	0	0	0	-0.091855480710349	0	0	0	-0.078367524331399	0	0	0	0	0	0	0	0	0
295	0	0	0	0	0	0	0	0	0	0	0	0	0	0	0	0	0	0	0	0	0	0	0	-0.101936799184506	0	0	0	0	0	0.103734439834025	0	0	0	0	0	0	0	0	0	0	0	0	0	0	0	0	0	0	0
296	0	0	0	0	0	0	0	0	0	0	0	0	0	0	0	0	0	0	0	0	0	0	0	0	-0.0819672131147541	0	0	0	0	0	-0.163934426229508	0	0.131752305665349	0	-0.0437374457331698	-0.032182120564159	0	0	0	0	0	0	0	0	0	0	0	0	0
297	0	0	0	0	0	0	0	0	0	0	0	0	0	0	-0.0881057268722467	0	0	-0.0881057268722467	0	0	0	0.18348623853211	0	0	0	0	0	0	0	0	0	0	0	0	0	0	0	0	-0.0881057268722467	0	0	0	-0.0881057268722467	0	-0.26431718061674	0	0	0	0.73394495412844
298	0	0	0	0	0	0	0	0	0	0	0	0	0	0	0	0	0	0	0	0	0	0	0	0	0	0	0	0	0	0	0	0	0	0	0	0	0	0	0	0	0	0	0	0.0884173297966401	0	0	0	0	0
299	0.0311866521128957	-0.00872752661895619	0	0	0	0	0	0	0	0	0	0	0	0	0	0	0	0	0	0	0	0	0	0	0	0	0	0	0	0	0	0	0	0	0	0	0	0	0	0	0	0	0	0	0	0	0	0	0
300	0	0	0	0	0.0662690523525514	-0.0300661455201443	0	0	0	0	0	0	0	0	0	0	0	0	0	0	0	0	0	0	0	0	0	0	0	0	0	0	0	0	0	0	0	0	0	0	0	0	0	0	0	0	-0.0300661455201443	0	0
301	0	0	0	0	0	0	0	0	0	0	0	0	0	0	0	0	0	0	0	0	0	0	0	0	0	0	0	-0.0178412132024978	0	0	0	0	0	0	-0.00892060660124889	0	0	0	0	0	0	0	0	0	0	0	0	0	-0.00892060660124889
302	0	0	0	0	0	0	0	0	0	0	0	0	0	0	0	0	0	0	0	0	0	0	0	0	0	0	0	0	0	0	0	0	0	0	0.0685871056241427	0	0	0	0	0	0	0	0	0	0	0	0	0	0
303	0	0	0	0	0	0	-0.046763965777554	0.0125817815802718	0	0	0	0	0	0	0	-0.00842105263157895	0	0	0	0	0	0	0	0	-0.00842105263157895	0	0	0	-0.00842105263157895	0	0	0	-0.0336842105263158	0	-0.0168421052631579	0	0	0	0	0	0	0	0	0	0	0.0125817815802718	0	0	0
304	0	0	0	0	0	0	0	0	0	0	0	0	0	0	0	0	0	0	0	0	0	0	0	0	0	0	0	0	0	0	0	0	0	0	0	0	0	0	0	0	0	0	0	0	0	0	0	0	0
305	0	0	0	0	0	0	-0.0335795836131632	0	0	-0.0335795836131632	0	0	0	0	0	0	0	0	0	0	0	0	0	0	0	0	0	0	0	0	0	0	0	0	0	0	0	0	0.193673337637185	0	0	0.023174031557438	0	0	0	0	0	0	0
306	0	0	0	0	0	0	0	0	0	0	0	0	0	0	0	0	-0.0450653447498873	0	-0.0450653447498873	0	0	0	0	0	0	0	0	0	0	0.177619893428064	0	0	0	0	0.177619893428064	0	0	-0.0450653447498873	0	0.177619893428064	0	0	0	0	-0.137837519821147	0	0	0	0
307	0	0	0	0	0	0	0	0	0	0	0	0	0	0	0	0	0	0	0	0	0	0	0	0	0	0	0	0	0	0	0	0	0	0	0	0	0	0	0	0	0	0	0	0	0	0	0	0	0
308	0	-0.091492034530967	0	-0.114854517611026	0	0	0	0.0691085003455425	0	0	0	0	-0.0382848392036753	0	0	0	0.0691085003455425	0	0.0691085003455425	-0.114854517611026	0	0	0	-0.0457460172654835	-0.0382848392036753	0	0	0	0	0	0	0	0	0	0	0	0	0	0	-0.0382848392036753	0	0	0	0	0	0	0	-0.0765696784073507	-0.0382848392036753
309	0	0	0	0	0	0	0	0.0190258751902588	0	0	0	0	0	-0.0069886085680341	0	0	0.0380517503805175	0	0	0	0	0	0	0	0	0	0	0	0	0	0	0	0	0	0	0	0	0	0	0	0	0	0	-0.0069886085680341	0	0	0	0	0
310	0.0237416904083571	0	-0.0821266109353768	0	-0.0235654530458348	0	0	0	0	0	0	0	0	0	-0.0353481795687522	0	0	0	0	0	0	0	0	0	0	0	0	0	0	0	0.0237416904083571	-0.0235654530458348	-0.0471309060916696	0.0237416904083571	0.0712250712250712	0	0	0	0	0	0	0	0	0	0	0	0	0	0
311	0	0	0	0	0	0	0	0	0	0	0	0	0	0	0	0	0	0	0	0	0	0	0	0	0.281425891181989	0	0	0	0	0	0	0	0	0	0	0	0	0	0	0	0	0	0	0	0	0	-0.0626959247648903	0	0
312	0	0	0	0	0	0	0	0	0	0	0	0	0	0	0	0	0	0	0	0	0	0	0	0	0	0	0	0	0	0	0	0	0	0	0	0	0	0	0	0	0	0	0	0	-0.0062293652276833	0	0	0	0
313	0	0	0	-0.0059343659130022	0	0	0	0.0158127767235927	0.00790638836179633	0	-0.0118687318260044	0	0	0	0	-0.0059343659130022	0	0	0	0	0	0	-0.0059343659130022	0	0	0	0	0	0	0.00790638836179633	0	0	0	0	0	0	0	0	0.00197202244879413	-0.0118687318260044	0	0	0	0	0	0	-0.0059343659130022	0	0
314	0	0	0	0	0	0	0	0	0	0	0	0	0	0	0	0	0.0500500500500501	0	0	0	-0.0246913580246914	0	0	0	0	0	0	0	0	0	0	0	0	0	0	0	0	0	0	0	0	0	0	0	0	0	0	0	0
315	0	0	0	0	0	0	0	0	0	0	0	0	0	0	0	0	0	0	0	0	0	0	0	0	0	0	0	0	0	0	0	0	0.0479846449136276	-0.0270562770562771	0	0	0	0	0	0	0	0	0	0	0	0	0	0	0
316	0	0	0	0	0	0.520833333333333	0	0	0	0	-0.0713775874375446	0	0	0.520833333333333	0	0	0	0	0	0	3.73059421841542	0	0	0.520833333333333	0	0	-0.642398286937901	0	0	2.52498215560314	0	0	-0.214132762312634	0	-0.0713775874375446	0	0	0	0	0	0	0	0	0	0	0	0	0	0
317	0	0	0	0	0	0	0	0	-0.0522739153162572	0	0	0.325732899022801	0	0	0	-0.209095661265029	0	0	-0.0522739153162572	0	-0.104547830632514	0	0	0	0	-0.104547830632514	-0.0522739153162572	0	0	0	-0.0522739153162572	0	0	0	-0.0522739153162572	0	0	0	0	0	0	0	0	0	0	0	0	0	0
318	0	0	0	0	0	0	0	0	0	0	0	0	0	0	0	0	0	0	0	0	0	0	0	0	0	0	0	0	0	0	0	0	0	0	0	0	0	0	0	0	0	0	0	0	0	0	0	0	0
319	0	0	0	0	0	0	0	0	0	0	0	0	0	0	0	0	0	0	0	0	0	0	0	0	0	0	0	0	0	0	0	0	0	0	0	0	0	0	0	0	0	0	0	0	0	0	0	0	0
320	0	0	0	0	0	0	0	0	0	0	0	0	0	0	0	0	0	0	0	0	0	0	0	0	0	0	0	0	0	0	0	0	0	0	0	0	0	0	0	0	0	0	0	0	-0.0686341798215511	0	0	0	0
321	0	0	0	0	0	0	0	0	0	0	0	0	0	0	0	0	0	0	0	0	0	0	0	0	0	0	0	0	0	0	0	0	0	0	0	0	0	0	0	0	0	0	0	0	0	0	0	0	0
322	0	0	0	0	0	0	0	0	0	0	0	0	0	0	0	0	0	0	0	0	0	0	0	0	0	0	0	0	0	0	0	0	0	0	0	0	0	0	0	0	0	0	0	0	0	0	0	0	0
323	0	0	0	0	0	0	0	0.0269701709908841	0	0	0.0107880683963536	0	-0.00385884350460167	0	0	0	0	0	-0.00771768700920334	0	0	0	0	0	0	0	0	0	0	0	0	-0.00192942175230084	0	0	0	0	0	0	0	0	0	0	-0.00578826525690251	0	0	0	0	0	0
324	0.0647249190938511	-0.0486381322957198	0	0	0.145536624985833	0	0	0	0	-0.0325513454975886	0	0	0	0	0	0	0	0	0	0	0	0	0	0	0	0	-0.0972762645914397	0	0	0	0.0647249190938511	0	0	0	0	0	0	0	0	0	0.129449838187702	0	0	0	0	0	0	0	0
325	0	0	0	0	0	0	0	0	0	0	0	0	0	0	0	0	0	0	0	0	0	0	0	0	0	0	0	0	0	0	0	0	0	0	0	0	0	0	0	-0.0240847784200385	0	0	0	0	0	0	0	0	0
326	0	0	-0.297397769516729	0.0327169387771348	0	0	0	-0.148698884758364	0	0	-0.0743494423791822	-0.148698884758364	0	0	-0.0743494423791822	0	0.107066381156317	0	0	-0.0743494423791822	0.107066381156317	0.321199143468951	0	0	0	-0.0743494423791822	-0.446096654275093	0.107066381156317	0	0	0	0	0	0	0.0327169387771348	0	0	0	0	-0.148698884758364	0	0	-0.0743494423791822	0	0	0	-0.0743494423791822	0	0
327	0	0	0	0	0	0	0	0	0	0	0	0	0	0	0	0	0	0	0	0	0	0	0	0.0515463917525773	0	0	0	0	0	0	0	0	0	0	0	0	0	0	0	0	0	0	0	0	0	0	0.0515463917525773	-0.0304599451720987	0
328	0	0	0	0	0	0	0	0	0	0	0	0	0	0	0	0.0963391136801541	0	0	0	0	0	0	0	0	-0.103896103896104	0	0	0	0	0	0	0	0	0	0	0	0	0	0	0	0	0	0	0	0	0	0	0	0
329	0.282180001346071	-0.13599274705349	-0.251596479628802	-0.0434503755141791	-0.035136408445407	-0.123917699644083	-0.189637629806759	-0.113723192405	0.228535118592802	0	-0.0453309156844968	0	0	0	-0.0453309156844968	0	0	0	0	0	0	0	0	0.218340611353712	-0.0906618313689937	0.383036339954154	-0.098975798437766	0.164695728600443	0.012075047409407	0.092542371539312	0.028702981546953	0.092542371539312	0.255357559969437	0	0	0.109170305676856	-0.0453309156844968	0	0	-0.181323662737987	0.0638393899923592	0	0	0.109170305676856	-0.0906618313689937	0	0.100856338608084	0.383036339954154	-0.498640072529465
330	0	0	0	0.0352858151023289	-0.017611835153223	0.0352858151023289	0	-0.0528355054596689	0	6.21447958829985e-05	0	-0.017611835153223	0.0705716302046577	0	0	0	0	0	0	0	-0.017611835153223	0	0	0	0	0	0	-0.017611835153223	0	0	0	0	0	-0.123282846072561	0	-0.01754969035734	0	-0.017611835153223	0.0352858151023289	-0.017611835153223	0	0	0	0	0	0	0	0	0
331	0	-0.0416658948811254	0.138121546961326	0	0	0	0	0	0	-0.0457177689728741	0.069060773480663	0	-0.0304785126485827	0	0.0538215171563716	0.0345303867403315	0.0538215171563716	0	0	0	0	0	0.0345303867403315	-0.0152392563242914	0	0	0.0345303867403315	0	0	0	0	0	0	0	0	0	-0.0152392563242914	0	0	0	0	0.0345303867403315	0	0	0	0	0	0	0
332	0	0	0	0	0	0.0578703703703704	0	0	0	0	0	0	0	0	-0.0311915159076731	0	0	0	-0.0311915159076731	0	0	0	0	0	0	0	0	0	0	0	0	0	0	0	0	0	0	0	0	0	0	0	0	0	0	0	0	0	0
333	0.294985250737463	0.221238938053097	0	0.0155729560816898	0	0	-0.29086678301338	-0.100773757123662	-0.116346713205352	0.0737463126843658	-0.116346713205352	0	0.147492625368732	-0.407213496218732	-0.116346713205352	0.147492625368732	-0.0426004005209862	0	0	0.0155729560816898	0	0.0155729560816898	0	-0.116346713205352	-0.011454488357607	0	-0.069627844960283	0.147492625368732	-0.174520069808028	0.0155729560816898	-0.143374157644648	-0.349040139616056	0.0155729560816898	-0.127801201562959	0.0155729560816898	-0.232693426410704	-0.116346713205352	-0.058173356602676	-0.116346713205352	-0.465386852821408	-0.174520069808028	-0.27529382693169	-0.302321271370987	-0.085200801041972	-0.150710178278172	-0.085200801041972	-0.100773757123662	0.221238938053097	-0.116346713205352
334	-0.28957528957529	0.0701415701415705	-0.28957528957529	0	-0.0965250965250965	0.166666666666667	-0.28957528957529	0.166666666666667	1.37709137709138	0.5	-0.0965250965250965	0.666666666666667	0.333333333333333	-0.0965250965250965	-0.122908622908623	0.306949806949807	-0.315958815958816	0.490990990990994	0	-0.193050193050193	-0.482625482625483	0.043758043758043	-0.175675675675676	-0.386100386100386	-0.193050193050193	-0.14929214929215	0.21042471042471	0.613899613899614	-0.28957528957529	0.166666666666667	-0.079150579150579	-0.0965250965250965	-0.94787644787645	-0.386100386100386	-0.315958815958816	0.5	0.043758043758043	-0.482625482625483	-0.193050193050193	0.0701415701415705	0	0.14028314028314	0.166666666666667	-0.28957528957529	0.333333333333333	-0.175675675675676	-0.386100386100386	-0.0965250965250965	0.306949806949807
335	-0.054889692695678	0	0	0	0	0	0	0	0	0.00232293433064647	0	0	0	0	0	0	0	0	0	0	0	0	0	0	0	0	0	0	0	0	0	0	0	0	0	0	0	0	0	0	0	0	0	0	-0.00237515586960394	0	0	0	0
336	0	0	0	0	0	0	0	0	0	0	0	0	0	0	0	0	0	0	0	0	0	0	0	0	0	0	0	0	0	0	0	0	0	0	0.240673886883273	0	0	0	0	0	0	0	0	0	0	0	0	0	0
337	0	0	0	0	0	0	0	0	0	0	0	0	0	0	0	0	0	0	0	0	0	0	0	0	0	0	0	0	0	0	0	0	0	0	0	0	0	0	0	0	0	0	0	0	0	0	0	0	0
338	0	0	0	0	0	0	0	0	0	0	0	0	0	0	0	0	0	0	0	0	0	0	-0.0157405949944908	0	0	0	0	0	0	0	0	0	0	0	0	0	0	0	0	0	0.0714540907466952	0	0	0	0	0	0	0	0
339	-0.033311125916056	0	0	0	0	0	0	0	0	0	0	0.0876424189307625	0	0	-0.0666222518321119	0	0	0	0	1.02000360846202	0.0876424189307625	0	-0.0999333777481679	0	0	0	0	0	0	0	-0.0122909588174054	0	0	0	0	0	0	0	0	0	0	0.192743254424015	0.0876424189307625	0	0	0	0	0	0
340	0	0	0	-0.0364830353885443	0	0	0	0	0	-0.002045672058651	0	0	0	-0.774326431394031	-0.0474912375163145	0	0	0	-0.0474912375163145	0	0	0	-0.070140556883924	-0.0055041010638851	0	-0.0055041010638851	0	0	0	0	0.149390570559411	-0.0839742729048585	-0.0364830353885443	0.0619578686493185	0	0	-0.0055041010638851	0	-0.027520505319426	0	0.116365964176101	-0.0364830353885443	-0.0110082021277702	0	0	0	-0.06400354070797	-0.0419871364524295	0
341	0	0	0	0	0	0	0	0	0	0	0	0	0	0	0	0	0	0	0	0	0	0	0	0	0	0	0	0	0	0	0	0	0	0	0	0	0	0	0	0	0	0	0	0	0	0	0	0	0
342	0	0	0	0	0	0	0	0	0	0	0	0	0	0	0	0	0	0	0	0	0	0	0	0	0	0	0	0	0	0	0	0	0	0	0	0	0	0	0	0	0	0	0	0	0	0	0	0	0
343	0	-0.065004770992366	0	0.3125	-0.143129770992366	0	0	0	-0.112714694656489	-0.238549618320611	-0.143129770992366	0	0	-0.0477099236641221	0.0608301526717557	-0.238549618320611	0	0	-0.0477099236641221	0.15625	0.078125	-0.0954198473282443	0	-0.0172948473282443	-0.0477099236641221	0.078125	-0.0954198473282443	0	-0.286259541984733	-0.572519083969466	0.234375	-0.143129770992366	-0.112714694656489	0	0.15625	0	0.0304150763358779	-0.0954198473282443	-0.0477099236641221	0	0	0	0.078125	-0.0477099236641221	0	0	0	-0.143129770992366	-0.034589694656489
344	0	0	0	0	0	-0.0383729854182655	0	0	0	0	0	0	0	0	0	0	0	0	0	0	0	0	0	0	0	0	0	0	0	0	0	0	0	0	0	0	0	0	0	0	0	0	0	0	0	0	0	0	0
345	0	0	0	0	0	0	0	0	0	0	0	0	0	0	0	0	0	0	0	0	0	0	0	0	0	0	0	0	0	0	0	0	0	0	0	0	0	0	0	0	0	0	0	0	0	0	0	0	0
346	0	0	0	0	0	0	0	0	0	0	0	0	0	0	0	0	0	0	0	0	0	0	0	0	0	0	0	0	0	0	0	0	0	0	0	0	0	0	0	0	0	0	0	0	0	0	0	0	0
347	0	0	0	0	0	0	0	0	0	0	0	0	0	0	0	0	0	0	0	0	0	0	0	0	0	0	0	0	0	0	0	0	0	0	0	0	0	0	0	0	0	0	0	0	0	0.0415282392026578	0	0	0
348	0	0	0	0	-0.0248323814253787	0	0	0	0	0	0	0	0	0	0	0	0	0	0	0	0	0	0	0	0	0	0	0	0	0	0	0	0	0	0	0	0	0	0	0	0	0	0	0	0	0	0	0	0
349	0	0	0	0	0	0	0	0	0	0	0	0	0	0	0	0	0	0	0	0	0	0	0	0	0	0	0	0	0	0	0	0	0	0	0	0	0	0	0	0	0	0	0	0	0	0	0	0	0
350	0	0	0	0	0	0	0	0	0	0	0	0	0	0	-0.0251193167545843	0	0	0.0044823690975246	0	0.0399201596806387	-0.0251193167545843	0	0	0	0	0	-0.0251193167545843	0	0	0	0	0	0	0	-0.0502386335091686	0	0	0	0	0	0	0	0	0.159680638722555	0.0399201596806387	0	0	0	0
351	0	0	0	0	0	0	0	-0.132450331125828	0	0	0	0	0	0	0	0	0	0	0	0	0	0	0	0	0	0	0	0	0	0	0	0	0	0	0	0	0	0	0	0	0	0	0	0	0	0	0	0	-0.0883002207505519
352	0.0358166189111748	0	0	0	0	0	0	0	0	0	-0.0290107339715695	0	0	0	0	0	0	0	-0.0290107339715695	0	0	0	0	0	0	0	0	0	0	0	0	0	0	-0.058021467943139	0	0	0	0	0	0	0	0	0	0	0	0	0	-0.0290107339715695	0
353	-0.076103500761035	0	0	0	0	0	0	0	0	0	0	0	-0.076103500761035	0	0	0	0	0	0	0	0	0	0	0	0	0	0	0	0	0	0	0	0	0	0	0	0	0	0	0	0	0	0.258064516129032	0	0	0.218294299602298	0	0	0
354	-0.0119853778390364	-0.00599268891951819	0	0	0	0	0	0	0	0	0	0	0	0	0	0	0	-0.00599268891951819	0	0	0	0	0	-0.00599268891951819	0	0	0	0	0	0	0	0	0	0	0	0	0	0	0	0	0	0	0	0	0	0	0	0	0
355	0	0	0	0	0	0	0	0	0	0	0	0	0	-0.0488997555012225	0	0	0.255102040816327	0	0	0	0	0	0	0	0	0	0	0	0	0	0	0	0	0	0	0	0	0	0	0	0	0	0.127551020408163	0	0	0	0	0	0
356	0	0	0	0	0	0	0	0	0	0	0	0	0	0	0	0	0	0	0	0	0	0	0	0	0	0	0	0	0	0	0	0	0	0	0	0	0	0	0	0	0	0	0	0	0	0	0	0	0
357	0	0	0	0	0	0	0	0	0	0	0	0	0	0	0	0	-0.0146284376828555	0	0	0	0	0	0	0	0	0	0	0	0	0	0	0	0	0	0	0	0	0	0	0	0	0	0	0	0	0	0	0	0
358	0	0	0	0	0	0	0	0	0	0	0	0	-0.0554938956714761	0	0	0	0	0	0	0	0	0	0	-0.0554938956714761	0	-0.0554938956714761	0	0	0	0	0	0	0	0	0.012240797689704	0	0	0	0	0	0.0616142945163278	0	0	0	0	0	0	0	0
359	0	0	0	0	0	0	0	0	0	0	0	0	0	0	0	0	0	0	0	0	0	0	0	0	0	0	0	0	0	0	0	0	0	0	0	0	0	0	0	0	0	0	0	0	0	0	0	0	0
360	0.0518403317781234	-0.0246426811237063	0	0	0	0	0	0	-0.0246426811237063	0	0	0	0	0	0	0	0	0	0	-0.0492853622474125	0	0	0	0.0518403317781234	-0.0739280433711188	0	0	0	0	0	0	0	0	0	0	0	0	0	0.0518403317781234	0	0	0	0	0	0	0	0	0	0
361	0	0	0	0	0	0	0	0	0	0	0	0	0	0	0	0	0	0	0	0	0	0	0	0	0	0	0	0	0	0	0	0	0	0	0	0	0	0	0	0	0	0	0	0	0	0	0	0	0
362	0	0	0	0	0	0	0	0	0	-0.0816993464052288	0	0	0	0	0	-0.163398692810458	0	0	0	0	0	0	0	0	0	0	0	0	-0.0816993464052288	-0.163398692810458	0	0	-0.0816993464052288	0.153374233128834	-0.163398692810458	0	0	0	0	0	0	0	-0.173423152492081	0	0	0.153374233128834	0	0	0
363	0	0	0	0	0	0	0	0	0	0	0	0	0	0	0	0	0	0	0	0	0	0	0	0	0	0	0	0	0	0	0	0	0	0	0	0	0	0	0	0	0	0	0	0	0	0	0	0	0
364	0	0	0	0	0	0	0	0	0	0	0	0	0	0	0	0	0	0	0	0	0	0	0	0	0	0	0	0	0	0	0	0	0	0	0	0	0	0	0	0	0	0	0	0	0	0	0	0	0
365	0	0	0	0	0	0	0	0	0	0	0	0	0	0	0	0	0	0	0	0	0	0	0	0	0	0	0	0	0	0	0	0	0	0	0	0	0	0	0	0	0	0	0	0	0	0	0	0	0
366	0	0	0	-0.0886524822695035	0	0	0	0	0	0	0	0	0	0	0	0	0	0	0	0	0	0	0	0	0	0	0	0	0	0	0	0	0	0	0	0	0	0	0	0	0	0	0	0	0	0	0	0	0
367	0	0	0	0	0	0	0	0	0	0	0	0	0	0	0	0	0	0	0	0	0	0	0	0	0	0	0	0	0	0	0	0	0	0	0	0	0	0	0	0	0	0	0	0	0	0	0	0	0
368	0	0	0	0	0	0	0	0	0	-0.000133472500660689	0	0	0	0	0	-0.000800835003964133	0	0	0	0	0	0	0	0	0	0	0	0	0	0	0	0	0	0	-0.000266945001321378	0	0	0	0	0	0	0	0	0	-0.000266945001321378	-0.000133472500660689	0	0	0
369	0	0	0	0	0	0	0	0	0	0	0	0	0	0	0	0	0	0	0	0	0	0	0	0	0	0	0	0	0	0	0	0	0	0	0	0	0	0	0	0	0.000198708000580227	0	0	0	0	0	0	0	0
370	0	0.00112371069184307	-0.0123628496368413	-0.00618142481842065	-0.0216349868644723	0.00730513551026372	0	0	0	0	0	0	0	0	0	0	0	0	0	0	0.00730513551026372	0	0	-0.00309071240921032	0	0	0	-0.00309071240921032	0	0	0	0	0	0	0	0	0	0	0	0	0	0	0	-0.00309071240921032	0	0	0	0	0
371	0	0	0	0	0	0	0	0	0	0	0	0	0	0	0	0	0	0	0	0	0	0	0	0	0	0	0	0	0	0	0	0	0	0	0	0	0	0	0	0	0	0	0	0	0	0	0	0	0
372	0	0	0	0	0	0	0	0	-0.000708978503771766	0	0	0	0	0	0	0	0	0	0	0	0	0	0	0	0	0	0	0	0	0	0	0	0	0	0	0	0	0	0	0	0	0	0	0	0	0	0	0	0
373	0	0	0	0.000202756520732189	0	0	-0.00032685186093107	0	0	0	0	0	0	0	0	-0.000163425930465535	0	0	0	0	0	0	0	0	0	0	0	0	0	0	0	0	-0.00032685186093107	0	0	-0.000490277791396605	0	0	0	-0.000163425930465535	0	0	0	0	-0.00032685186093107	0	0	0	-0.000163425930465535
374	0	0	0	0	0	0	0	0	0	0	0	0	0	0	0	0	0	0	0	0	0	0	0	0	0	0	0	0	0	0	0	0	0	0	0	0	0	0	0	0	0	-8.50152177239726e-05	0	0	0	0	-0.000170030435447945	0	0
375	0	0	0	0	0.000349342130204763	0	0	0	0	0	0	0	0	0	0	0	0	0	0	0	0	-0.000358437070995631	0	0	0	0	0	0	0	0	0	0	0	0	0	0	0	0	0	0	0	0	0	0	0	0	0	0	0
376	0	0	0	0	0	0	0	0	0	0	0	0	0	0	0	0	0	0	0	0	0	0	0	0	0	0	0	0	0	0	0	0	0	0	0	0	0	0	0	0	0	0	0	0	0	0	0	0	0
377	0	0	0	-0.000251769942697161	0	0	-0.000251769942697161	0	0	0	0	0	0	0	0	0	0	0	0	0	0	0	0	0	0	0	0	0	0	0	0	0	0	0	0	0	0.00137438782475639	0	0	0	0	0	0	0	0	-4.5410610475525e-05	-0.0091464928177218	0.000458129274918797	0
378	0	0	0	0	0	0	0	0	0	0	0	0	0	0	0	0	0	0	0	0	4.2624054302074e-05	0	0	0	0	0	0.000325579123866578	0	0	0	0	-0.000141477534782252	0	0	0	0	0	0	0	0	0	0	0	0	-0.000141477534782252	0	0	0	0
379	0	0	0	0	0	0	0	0	0	0	0	0	0	0	0	0	0	0	0	0	0	0	0	0	0	0	0	0	0	0	0	0	0	0	0	0	0	0	0	0	0.0162284972411555	0	0	0	0	0	0	0	0
380	0	0	0	0	0	0	0	0	0	0	0	0	0	0	0	0	0	0	0	0	0	0	0	0	0	0	0	-0.000582367089271051	0	0	0	0	0	0	0	0	0	-0.000582367089271051	0	0	0	0	0	0	0.000448252622361549	0	0	0	0
381	0	0	0	0	0	0	0	0	0	0	0	0	0	0	0	0	0	-0.00525306647755627	0	0	0	0	0	0	0	0	0	0	0	0	0	0	0	0	0	0	0	0	0	0	0	0	-0.00262653323877814	0	0	0	0	0	0
382	0	0	0	0	0	0	0	0	0	0	0	0	0	0	0	0	0	0	0	0	0	0	0	0	0	0	0	0	0	0	0	0	0	0	0	0	0	0	0	0	0	0	0	0	0	0	0	0	0
383	0	0	0	0	0	0	0	0	0	0	0	0	0	0	0	0	0	0	0	0	0	0	0	0	0	0	0	0	0	0	0	0	0	0	0	0	0	0	0	0	0	0	0	0	0	0	0	0	0
384	0.00139244736548958	0	-0.00277184910053497	0	0	0	0	0	1.30456304442e-05	0	0	0	-0.000923949700178322	0	0	0	-0.000923949700178322	0	0	0.0037349356920459	-0.000923949700178322	0.00139244736548958	-0.000923949700178322	0.00187399066124505	0	-0.00184789940035664	0	0	0	0	0	0	0	-0.00369579880071329	0	-0.000923949700178322	0	0	0	-0.000923949700178322	0	0	0	0	0	-0.000923949700178322	0	0	-0.000923949700178322
385	0	0	0	0	0	0	0	0	0	0	0	0	0	0	0	0	0	0	0	0	0	0	0	0	0	0	0	0	0	0	0	0	0	0	0	0.00132506749889523	0	0	0	0	0	0.000368495139549109	0	0.000736990279098219	0	0	0.000956572359346121	0	0
386	0	0	0.0142126587917299	0	0	0.00520247817984453	0	0	0	0	0	0.0018074423982364	0	0	0.00155065204918668	-0.00200026003380439	0	0	0	0	0	0	0	0	-0.0035968638769417	0	0	-0.00700091011831538	0	0	0	0	0	0	0	0	-0.0010001300169022	0	0	0	0	0	0	0	-0.0010001300169022	0	-0.0010001300169022	0	0
387	0	0	0	0	0	0	0	0	0	0	0	0	0	0	0	0	0	-0.00354572208630288	0	0	0	0	0	-0.001283585724723	0.00146782595528532	0	0	0	0	0	0	0	0	0	0	0	0	0	0	0	0	0	0	0	0	0	0	0	0
388	0	0	0	0	0	0	0	0	0	0	0	0.00345514644062331	0	0	0	0	0	0	0	0	0	0	0	0	0	0	0	0	0	0	0.00115171548020777	-0.00132340777502068	0	0.00115171548020777	0	0	0	0	0	0	0	0	0	0	0	0	0	0	0
389	0	0	0	0	-0.000193490028007682	0	0	0	-0.000290235042011522	0	0	-0.000193490028007682	0	0.000190074319058752	0.000380148638117504	0	0	0	0	0	0	0	0	0	0	0	0	0	0	0	0	0	0	0	0	0	0	0	0	0	0	0	0	0	0	0	0	0	0
390	0	0	0	0	0	0	0.00752502069380691	0	0	0	0	0	0	0	0	0	0	0	0	0	0	0	0	0	0	0	0	0	0	0	0	0	0	0	0	0	0	0	0	0	0	0	0	0	0	0	0	0	0
391	0	0	0	0	0	0	0	0	0	0	0	0	0	0	0	0	0	0	0	0	0	0	0	0	0	0	0	0	0	0.000751585846135346	0	0	0	0	0	0	0	0	0	0	0	0	0	0	0	0	0	0	0
392	0	0	0	0	0	0	0	0	0	0	0	0	0	0	0	0	0	0	0	0	0	0	0	0	0	0	0	0	0	0	0	0	0	0	0	0	0	0	0	0	0	0	0	-0.0141823854772373	0	0	0	0	0
393	0	0	0	0	0	0	0	0	0	0	0	0	0	0	0	0	0	0	0	0	0	0	0	0	0	0	0	0	0	0	0	0	0	0	0	0	0	0	0	0	0	0	0	0	0	0	0	0	0
394	0	0	0	0	0	0	0	0	0	0	0	0	0	0	0	0	0	0	0	0	0	0	0	0	0	0	0	0	0	0	0	0	0	0	0	0	0	0	0	0	0	0	0	0	0	0	0	0	0
395	0	0	0	0	0	0	-0.000225622096525645	0	0	0	0	0	0	0	0	0	0	0	0	0	0	0	0	0	0	0	0	0	0	0	0	0	0	0	0	0	0	0	0	0	0	0	0	0	0	0	0	0	0
396	0	0	0	0	0	0	0	0	0	0	0	0	0	0	0	0	0	0	0	0	0	0	0	0	0	0	0	0	0	0	0	0	0	0	0	0	0	0	0	0	0	0	0	0	0	0	0	0	0
397	0.00660851176315094	-0.00181054461181924	0	0	0	0	0	0	0	0	0	0	0	0	0	0	0	0	0	0	0	-0.00181054461181924	0	0	0	0	0	-0.000316833342063	0	0	0	0	0	0	0	0	0	0	0	0	0	0	0	0	0	0	0	0	0
398	0	0	0	0	0	0	0	0	0	0	0	0	0	0	0	0	0	0	0	0	0	0	0	0	0	0	0	0	0	0	0	0	0	0	0	0	0	0	0	0	0	0	0	0	0	0.00715358752414336	0	0	0
399	0	0	0	0	0	0.000734186143503909	0	0	0	0	0	0	0	0.000471140300870196	0	0	0	0	0	0	0	0	0	-0.000624283374709448	0	0	0	0	0	0	0	0	-0.000416188916472965	-0.000208094458236483	0	0	0	0	0	0	0	0	0	0	0	0	0	0	0
400	0	0	0	0	0	0	0	0	0	0	0	0	0	0	0	0	0	0	0	0	0	0	0	0	0	0	0	0	0	0	0	0	0	0	0	0	0	0	0	0	0	0	0	0	0	0	0	0	0
401	0	0	0	0	0	0	0	0	0	0	0	0	0	0	0	0	0	0	0	-0.0104253544620517	0	0	0	0	0	0	0	0	0.0190657769304099	0	0	-0.0104253544620517	0	0	0	0	0	0	0	0	0	0	0	0	0	0	0	0	0
402	0	0	0	0	0	0	0	0	0	0	0	0.0029930262488402	0	0.00598605249768041	0	0	0	0.00897907874652061	-0.00220541208124738	0	0.0029930262488402	0	-0.00441082416249476	0.0029930262488402	0	0	0.00078761416759282	0	0	0	0	0	0	0	-0.00220541208124738	0	0	0	0	0	0	0	0	0	0	0	0	-0.00220541208124738	-0.00441082416249476
403	0	0	0	0	-0.000161417113119499	0	0	0	0	0	-0.000161417113119499	0	0	0	0	0	0	0	0	0	-0.000161417113119499	0.000633292169342326	0.00426543993070895	0.00173845939490748	0.00109897908399732	0.000316646084671163	0	-0.00270024849970083	0	-0.000335210509374666	0	0	-0.000167605254687333	0	0	0	0	0	-0.00113610793340433	0	0	-0.000807085565597494	0	0	0	0	0	0	0
404	0	0	0	0	0	0	0	0	0	0	0	0	0	0	0	0	0	0	0	0	0	0	0	0	0	0	0	0	0	0	0	0	0	0	0	0	0	0	0	0	0	0	0	0	0	0	0	0	0
405	0	-0.00298535453844783	0	0	-0.000174998031272148	0	0	0	-8.9230350106293e-05	0	0	0	0	0	0	0	0	0	0	0	0	0	0	0	0	0	-0.000349996062544296	-0.000174998031272148	0	0	0	0	0	0	0	0	0	0	0	0	0	0	0	0	0	0	0	0	0
406	0	0	0	0	0	0	0	0	0	0	0	0	0	0	0	0	0	0	0	0	0	0	0	0	0	0	0	0	0	0	0	0	0	0	0	0	0	0	0	0	0	0	0	0	0	0	0	0	0
407	0	0	0	0	0	0	0	0	0	0	0	0	0	0	0	0	0	0	0	0	0	0	0	0	0	0	0	0	0	0	0	0	0	0	0	0	0	0	0	0	0	0	0	0	0	0	0	0	0.00039232456226387
408	0	0	0	0	0	0	0	0	0	0	0	0	0	0	0	0	0	0	0	0	0	0	0	0	0	0	0	0	0	0	0	0	0	0	0	0	0	0	0	0	-0.00231755081230156	0	0	-0.00231755081230156	0	0	0	0	0
409	0.00235066185345913	-0.0153994764178018	-0.0099119775487728	-0.00302452627812546	-0.00291221554068108	0.00537518813158461	-0.0153994764178018	0.0026875940657923	0.00783816072248812	-0.00699976200809172	0.00666282979575856	-0.00979966681132841	0.00128764166417395	-0.00279990480323669	0.00806278219737691	-0.00139995240161835	0	0	0.00537518813158461	-0.00279990480323669	0	0	-0.00139995240161835	0	0.0026875940657923	0	0	0	0	0	0	0	0	-0.00139995240161835	0.00537518813158461	0	0	0	0	0	-0.00139995240161835	0	-0.00279990480323669	0	0	0	0	0	0
410	0	0	0	0	0	0	0	0	0	0	0	0	0	0	-0.00109493047191503	0	0	0	0	0	0	0	0	0.00508431488856876	0.00628399720378454	0	0	0	0	0	0	0	0	0	0	0	0	0	0	0	0	0	0	0	0	0	0	0	0.00169477162952292
411	0	0	0	0	0	-0.00760649087221095	0	0	-0.00253549695740365	0	0	0	0	0	0	0	0	0	0	0	0	0	0	0	0	0	0	0	0	0	0	0	0	0	0	0	0	0	0	0	0	0	0	0	0	0	0	0	0
412	0	0	0	0	0	0	0	0	-0.00175183504721195	0	0	0	0	0	0	0	0	0	0	0	0	0	0	0	0	0	0	0	0	0	0	0	0	0	0	0	0	0	0	0	0	0	0	0	0	0	0	0	0
413	0	0	0	0	0	0	0	0	0	0	0	0	0	0	0	0	0	0	-0.00420804578353812	0	0	0	0	0	0	0	0	0	0	0	0	0	0	0	-0.00420804578353812	0	0	0	0	0	0	0	0	0	0	0	0	0	0
414	0	0	0	0	0	0	0	0	0	0	0	0	0	0	0	0	0	0	0	0	0	0	0	0	0	0	0	0	0	0	0	0	0	0	0	0	0	0	0	0	0	0	0	0	0	0	0	0	0
415	0	0	0	0	0	0	0	0	0	0	0	0	0	0	0	0	0	0	0	0	0	0	0	0	-0.00224502166445906	0	0	0	0	0.0087600192720424	0	0	0	0	-0.00224502166445906	0	0	0	0	0	-0.00224502166445906	0	0	0	0	0	0	0	0
416	0	0	0	0	0	0	0	0	0	0	0	0	0.00118743691741376	0	0	0	0	0	0	0	0	0	0	0.000334090233945645	0	0	-0.00049443577979433	0	0	0	0	0	0	0	0	0	0.00118743691741376	0	0	0	0	0	0	0	0.000593718458706881	0	0	0	0.000593718458706881
417	0	0	0	0	0	0	0	0	0	0	0	0	0	0	0	0	0	0	0	0	0	0	0	0	0	0	0	0	0	0	0	0	0	0	0	0	0	0	0	0	0	0	0	0	0	0	0	0	0
418	0	0	0	0	0	0	0	0	0	0	0	0	0	0	0	0	0	0	0	0	0	0	0	0	0	0	0	0	0	0	0	0	0	0	0	0.0195160031225605	0	0	0	0	0	0	0	0	0	0	0	0	0
419	0	0	0	0	0	0	0	0	0	0	-0.00686577411603158	0	0	0	0	0	0	0	0	0	0	0	0	0	0	0	0	0	0	0	0	0	0	0	0	0	0	0	0	0	0	0	0	0	0	0	0	0	0
420	-0.0163044364371546	-0.0216534444324747	-0.00185928217580238	-0.00163044364371545	-0.011870782570182	-0.0253720087840796	-0.00489133093114637	-0.00720829017112264	0.0011727665795416	-0.00022883853208692	-0.0211957673683009	0.00560642044651408	-0.00326088728743091	-0.00815221821857728	-0.00489133093114637	-0.0132723876818106	-0.000457677064173849	0	0.00303204875534399	0	0	-0.00163044364371545	0.00303204875534399	-0.00163044364371545	0	0	-0.00163044364371545	0	0	0	0	-0.00163044364371545	0	0.00909614626603196	-0.00978266186229273	-0.00326088728743091	0.00140160511162854	0	0	0	-0.00163044364371545	0	0	0	-0.00326088728743091	0	0.00140160511162854	0	0
421	0	0	0	0	0	0	0	-0.0619195046439628	-0.0407825308826104	0	0	-0.0928792569659443	0	0	-0.0309597523219814	0	-0.195581292492517	0	0.13515320448865	-0.0619195046439628	0	0	0	0	0	0	0	0	0	0	0	0	0.0830564784053156	0	0	0.436419365787931	0	0	0.0520967260833342	0	0	-0.0309597523219814	0	0	-0.184267097291793	-0.0309597523219814	0	0.187249930571984	0
422	0	0	0	0	0	0	0	0	0	0	0	0	0	0	0	0	0	0	0	0	0	0	0	0	0	0	0	0	0	-0.0298195914715968	0	0	0	0	0	0	0	0	0	0	0	0	0	0	0	0	0	0	0
423	0	0	0	0	0	0	0	0	0	0	0	0	0	0	0	0	0	0	0	0	0	0	0	0	0	0	0	0	0	0	0	0	0	0	0	0	0	0	0	0	0	0	0	0	0	0	0	0	0
424	0	0	0	0	0	0	0	0	0	0	0	0	0	0	0	0	0	0	0	0	0	0	0	0	0	0	0	0	0	0	0	0	0	0	0	0	0	0	0	0	0	0	0	0	0	0	0	0	0
425	0	0	0.00196209237530903	0	-0.000557485073337161	0	0	0	0	0	0	0	0	0	0	-0.000557485073337161	0	0	0	0	0	0	0	0	0	0	0	0	0	0	0	0	0	0	0	0	0	0	0	0	-0.000557485073337161	0	0	0	0	0	0	-0.000557485073337161	0
426	0	0	0	0	0	0	0	0	0	0	0	0	0	0	0	0	0	0	0	0	0	0	0	0	0	0	0	0	0	0	0	-0.00241893542651879	0	0	0	0	0	0	0	-0.00120946771325939	0	0	0	0	0	0	0	0	0
427	0	0	0	0	0	0	0.0210348506094565	0	-0.0128724199637755	0	0	0	0.0047305151286034	0	0	-0.00358654328957751	0	-0.00358654328957751	0	0	0	-0.0231476407044995	0	0	-0.01434617315831	0	0	0	0	0	0	-0.0107596298687325	0	0.0471299977030254	0	0	0.0014737531945345	-0.0016283809670344	0	0	-0.0107596298687325	0	-0.0107596298687325	0.0063588960956378	0.0538186751541719	0.0309802899946718	0.34059708925944	-0.00358654328957751	0.0063588960956378
428	0	0	0	0	0	0	0	0	0	0	0	0	0	0	0	0	0	0	0	0	0	0	0	0	0.0475511174512601	0	0	0	0	0	0	0	0	0	0	0	0	0	0	0	0	0	0	0	0	0	0	0	0
429	0	0	0	0	0	0	0	0	0	0	0	0	0	0	-0.00618008775724615	0	0	-0.00618008775724615	0	0.0260795455872796	0	0.025399948308132	0	0.0035997418379836	0	-0.00618008775724615	0	0	0	0.0188800619113121	0	-0.0029201445588363	-0.00618008775724615	-0.0770811976457901	0	0	0	0	0	0	0	0	0	0	0	0	0	0	0
430	0	0	0	0	0	0	0	0	-0.00883080183680678	0	0	0	0	0	0	0	0	0	0	0	0	0	0	0	0	0	0	0	0	0	0	0	0	0	0	0	0	-0.00883080183680678	0	0	0	0	0	0	0	0	0	0	0
431	0	0	0	0	0	0	0	0	0	0	0	0	0	0	0	0	0	0	0	0	0	0	0	0	0	0	0	0	0	0	0	0	0	0	0	0	0	0	0	0	0	0	0	0	0	0	0	0	0
432	0	0	0	0	0	0	0	-0.0191314329443275	0	0	0	0	0	0	0	0	0	0	0	0	0	0	0	0	0	0	0	0	0	0	0	0	0	0	0	0	0	0	0	0	0	0.0380807311500381	0	0	-0.0191314329443275	0	0	0	0
433	0	0	0	0	0	0	0	0	0	0	0	0	0	0	0	0	0	0	0	0	0	0	0	0	0	0	0	0	0	0	0	0	0	0	0	0	0	0	0	0	0	0	0	0	0	0	0	0	0
434	0	0	0	0	0	0	0	0	0	0	0	0	0	0	0	0	0	0	0	0	0	0	0	0	0	0	0	0	0	0.00012701640241851	0	0	-0.000285834336135463	0	0	0	0.000698685074689435	0	0	0	0	0	0	-0.000285834336135463	0	0.000412850738553972	0.00139737014937887	0	0.00092091634822801
435	0	0	0	-0.0103939299449122	0	-0.0103939299449122	0	0	0	0	0	0	0	0	0	0	0	0	0	0	0	0	0	0	0	0	0	0	0	-0.224774674447266	0	0	0	0	0	0	0	0	0	0	0	0	0	0	0	0	0	0	0
436	0	-0.00456996618225025	0	0	0	0	0	0	-0.00228498309112513	0	0	0	0	0	0	0	0	0	-0.00228498309112513	0	0	0	0	0	0	0	0	0	0	0	0	0	0	0	0	0	0	-0.00456996618225025	0	0	0	0	0	0	-0.0091399323645005	0	0	0.00606943432872056	0
437	-0.000214633727543946	0	0	0	0	0	0	-0.000214633727543946	0	0.000501939998092628	0	0	-0.000356594912083157	0	0	0	-0.000141961184539211	0	0	0	0	0	0	0	0	0	0	0	0	0	0	0	0	0	0	0	0	0	0	0	0.000789246268641314	0	0	-0.000429267455087892	0	0	0	-0.000643901182631839	-0.000214633727543946
438	0	0	0	0	0	0	0	0	0	0	0	0	0	0	0	0	0	0	0	0	0	-0.000161626610205104	0	0.000245956475542088	0	0	0	0	-0.000161626610205104	0	0	0	0	0	0	0	0	0	0	0	0	0	0	0	-0.000323253220410208	0	0.000245956475542088	0	0
439	0	0	0	0	0	0	0	0	0	0	0	0	0	0	0	0	0	0	0	0	0	0	0	-0.00526555972899919	0.00310848616723656	0	-0.00702074630533226	0	0	0	0	0	0	0	0	0	0	0	0	0	0	0	0	0	0	0	0	0	0
440	0	0	0	0	0	0	0	0	0	0	0	0	0	0	0	0	0	0	0	0	0	0	0	0	0	0	0	0	0	0	0	0	0	0	0	0	0	0	0	0	0	0	-0.00523834468308015	0	0	0	0	0	0
441	0	0	0	0	0	0	0	0	0	0	0	0	0	0	0	0	0	0	0	0	0	0	0	0	0	0	0	0	0	0	0	0	0	0	0	-0.00930665425779432	0	0	0	-0.00930665425779432	0	-0.00930665425779432	0	-0.00930665425779432	0	0	0	0	0
442	0	-0.00238971466806863	0	0	0.00238583452008801	0	0	0.00477554918815664	0.00477166904017601	0	0	0	0.0143033666765861	0.0190983166046459	-0.00238971466806863	0	-0.00477942933613727	0.00476778889219537	0	0	0	0	-0.00955885867227453	0	-7.76029596124932e-06	0	0	-0.00477942933613727	0	0	0	0.00477554918815664	0.0167008416406161	-0.00955885867227453	0	-0.026286861348755	0	-0.00238971466806863	0	0	-0.00238971466806863	0.0047639087442148	0	0	0	-0.00955885867227453	0	0	0
443	0	0	0	0	0	0	0	0	0	0	0	0	0	0	0	0	0	0	0	0	0	0	0	0	0	0	0	0	0	0	0	-0.00129002296240873	0	0	0	0	0	0	-0.00129002296240873	0	0	0	0	0	0	0	0	0	0
444	0	0	0	0	0	0	0	0	0	0	0	0	0	0	0	0	0	0	0	0	0	0	0	0	0	0	0	0	0	0	0	0.000102207059237167	0	0	0	0	0	0	0	0	0	0	0	0	0	0	0	0	0
445	0	0	0	0	0	-0.00310896937665164	0	0	0	0	0	0	0	0	0	0	0	0	0	0	0	0	0	0	0	0	0	0	0	0	0	0	0	0	0	0	0	0	0	0	0	0	0	0	0	0	0	0	0
446	0	0	0	0	0	0	0	0	0	0	0	0	0	0	0	0	0	0.00957579239682084	0	0	0	0	0	0	0	0	0	0	0	0	0	0	0	0	0	0	0	0	0	0	0	0	0	0	0	0	0	0	0
447	0	0	0	0	0	0	0	0.0153527289475704	0	0	0.0153527289475704	0	-0.00401074880680223	0	0	0	0	0	0	0	0	0	0	0	0	0	0	0	0	0.0113419801407682	0	0	0.00767636447378522	-0.0160429952272089	-0.00401074880680223	0	0	0	0	0	0	-0.00401074880680223	0	0	0	0	0	0	0
448	0	-0.00427058421592074	0	0	0	0	-0.00427058421592074	0	0	0	0	0	0	-0.00854116843184148	0	0	0	-0.00427058421592074	0.00943040362127499	0	0	0	-0.00427058421592074	0	0	0	-0.00854116843184148	-0.00427058421592074	0.00943040362127499	0	0	-0.017082336863683	0.00943040362127499	-0.0128117526477622	0	0	0	0	0	0	0	-0.00854116843184148	0	0	-0.00427058421592074	0	0	0.01886080724255	0
449	0	0	0	0	0	0	0	0	0	0	0	0	0	0	0	0	0	0	0	0	0	0	0	0	0	0	0	0	0	0	0	0	0	0	0	0	0	0	0	0	0	0	0	0	0	0	0	0	0
450	-0.000231351881584853	-0.00046606402007856	0	0	0	-0.00046606402007856	0	0	0	-0.00138811128950912	0	-0.000231351881584853	0	0	-0.000231351881584853	0	0	-0.000231351881584853	0	0	0	0	0	0	0	0	0	0	0	0	0	-0.000231351881584853	0	0	-0.000231351881584853	0	0	-0.000231351881584853	0	0	0	0	0	0	0	-0.000231351881584853	0	0	0
451	0	0	0	0	0	0	0	0	0	0	0	0	0	0	0	0	0	0	0	0	0	0	0	0	0	0	0	0	0	0	0	0	0	0	0	0	0	0	0	0	0	0	0	0	0	0	0	0	0
452	0	0	0	0	0	0	0	0	0	0	0	0	0	0	0	0	0	0	0	0	0	0	0	0	0	0	0	0	0	0	0	0	0	0	0	0	0	0	0	0	0	0	0	0	0	0	0	0	0
453	0	0	0	0	0	0	0	0	0	0	0	0	0	0	0	0	0	0	0	0	0	0	0	0	0	0	0	0	0	0	0	0	0	0	0	0	0	0	0	0	0	0	0	0	0	0.00162588407446549	0	0	0
454	0	0	0	0	0	0	0	0	0	0	0	0	0	0	0	0	0	0	0	0	0	0	0	0	0	0	0	0	0	0	0	0	0	0	0	0	0	0	0	0	0	0	0	0	0	0	0	0	0
455	0	0	0	0	0	0	0	0	0	0	0	0	0	0	0	0	0	0	0	0	0	0	0	0	0	0	0	0	0	0	0	0	0	0	0	0	0	0	0	0	0	0	0	0	0	0	0	0	0
456	0	0	0	0	0	0	0	0	0	0	0	0	0	0	0	0	0	0	0	0	0	0	0	0	0	0	0	0	0	0	0	0	0	0	0	0	0	0	0	0	0	0	0	0	0	0	0	0	0
457	0	-0.00912658574427307	0	0	0	0	0	0	0	0	-0.00456329287213653	0	0	0	0.00736268590781917	0	0	0	0	0	0.0050810394717509	0	0	0	0	0	0	0	0	0	0	0	0	-0.00228164643606827	0	0	0	0.0050810394717509	0	0.0185602580505498	0	-0.0047739529097473	-0.00404554627252213	0.0048703794341402	0.0220880577234575	-0.0068449393082048	0	-0.00912658574427307	0
458	0	0	0	0	0	-6.4075865825137e-05	0	0	0	0	0	0	-6.4075865825137e-05	0	0	0	0	0	0	0	0	0	0	0	0	0	0	0	0	0	0	0	0	0	0	0	0	0	0	0	0	0	0	0	0	0	0	0	0
459	0	0	0	0	0	0	0	0	0	0	0	0	0	0	0	0	0	0	0	0	0	0	0	0	0	0	0	0	0	0	0	-0.0106786267286027	0	0	0.0104764399098572	0	0	0	0	0	0	0	0	0	0	0	0	0	0
460	0	0	0	0	0	0	0	0	0	0	0	0	0	0	0	0	0	0	0	0	0	0	0	0	0	0	0	0	0	0	0	0	0	0	0	0	0	0	0	0	0	0	0	0	0	0	0	0	0
461	0	0	0	0	0	0	0	0	0	0	0	0	0	0	0	0	0	0	0	0	0	0	0	0	0	0	0	0	0	0	0	0	0	0	0	0	0	0.244463935189911	0	0	0	0	0	0	0	0	0	0	0
462	0	0	0	0	0	0	0	0	0	0	0	0	0	0	0	0	0	0	0	0	0	0	0	0	0	0	0	0	0	0	0	0	0	0	0	0	0	0	0	0	0	0	0	0	0	0	0	0	0
463	0	0	0	0	0	0	0	0	0	0	0	0	0	0	0	0	0	0	0	0	0	0	0	0	0	0	0	0	0	0	0	0	0	0	0	0	0	0	0	0	0	0	0	0	-0.0045611770927032	0	0	0	0
464	0	0	-0.00366059008712204	0	0	0	0	0	0	0	0	0	-0.00732118017424409	0	0	0	0	0	0	0	-0.00366059008712204	0.00683246788740093	0	0	0	-0.00366059008712204	0	0	0	0	-0.0109817702613661	0	0	0	0	0	0	0	0	0	0	0	0	0	0	0	0	0	0
465	0	0	0	0	0	0	0	0	0	0	0	0	0	0	0	0	0	0	0	0	0	0	0	0	0	0	0.0632111251580278	0	0	0	0	0	0	0	0	0	0	0	0	0	0	0	0	0	0	0	0	0	0
466	0	0	0	0	0	0	0	0	0	0	0	0	0	0	0	0	0	0	0	0	0	0	0	0	0	0	-0.00170633904956915	0	0	0	0	0	0	0	0	0	0	0	0	0	0	0	0	0	0	0	0	0	0
467	0	0	0	0	0	0	0	0	0	0	0	0	0	0	0	0	0	0	0	0	0	0	0	0	0	0	0	0	0	0	0	0	0	0	0	0	0	0	0	0	0	0	0	0	0	0	0	0	0
468	0	0	0	0	0	0.0017864799199657	0.00089323995998285	-0.00046990935448552	0	-0.00046990935448552	0	0	0	0	0	0	0	0	0	0	0	0	0	0	0	0	0	0	0	0	0	-0.00046990935448552	0	0	0.00089323995998285	0	0	0	0.00089323995998285	-0.00046990935448552	0.00089323995998285	0	0	0	-0.00051648810347371	0	-0.00046990935448552	0.00352638109094321	0
469	0	0	0	0	0	0	0	0	0	0	0	0	0	0	0	0	0	0	0	0	0	0	0	0	0	0	0	0	0	0	0	0	0	0	0	0	0	0	0	0	0	0	0	0	0	0	0	0	0
470	0.0079719387755102	0.383154761242452	-0.01557753719137	0	-0.00778876859568502	-0.00389438429784251	-0.0389438429784251	-0.00389438429784251	0.024282156686181	0	0	-0.00389438429784251	-0.077983306999877	-0.0233663057870551	-0.0031617035785418	-0.00778876859568502	-0.01557753719137	-0.23389403857189	-0.0116831528935275	0	0	0	0	0	-0.0233663057870551	0	0	0.0120494932531779	0	0	-0.0194719214892126	0	0	0	0	0	0	0	0	0	-0.00778876859568502	0	0	-0.00389438429784251	0	0	0	0	0
471	0	0	0	0	0	0	0	0	0	0	0	0	0	0	0	0	0	0	0	0	0	0	0	-0.0181290790427846	0	0	0	-0.00906453952139231	0	0	0	0	0	0.0157306905773163	0	0	0	0	0	0	0	0	-0.00906453952139231	0	0	0	0	0	0
472	0	0	0	0	0	0	0	0	0.0079792789660544	0	0	0	0	0	0	0	0	0	0	0	0	-0.00368582064796727	0	0	0	0	0	0	0	0	0	0	0	0	0.00634558030331874	0	0	0.0153509202619889	0	-0.0010260609926158	0	0	-0.0399363894575201	0	0	0	0	0	0
473	0	0	0	0	0	0	0	0	0	0	0	0	0	0	0	0	0	0	0	0	0	0	0	0	0	0	0	0	0	0	0	0	0	0	0	0	0	0	0	0	0	0	0	0	0	0	0	0	0
474	0	-0.00785854616895874	0	0	0	0	0	0	0	0	0	0	0	0	0	0	0	0	0.01312163758037	-0.0235756385068762	0	0	0	0	0	0	0	0	0	0	0	-0.0235756385068762	0	0.0630849150406188	0	0	0	0	0	0	0	0	0	0	0	0	0	0	0
475	0	0	0	0	0	0	0	0	0	0	0	0	0	0	0	0	0	0	0	0	0	0	0	0	0	0	0	0	0	0	0	0	0	0	0	0	0	0	0	0	0	0	0	0	0	0	0	0	0
476	0	0	0	0	0	0	0	0	0	0	0	-0.00336496399488525	0	0	0	0	0	0	0	0	0	0	-0.00336496399488525	0	0	0	0	0	0	0	-0.00336496399488525	0	0	0	0.00618811881188119	0	0.00618811881188119	0	0	0	0	-0.0100948919846558	0	-0.00672992798977051	0	0	0	0	0
477	0	0	0	0	0	0	0	0	0.0116090085906664	0	0	0	0	0	0	0	0	0	0	0	0	0	0	0	0	0	0	0	0	0	0	0	0	0	0	0	0	0	0	0	0	0	0	0	0	0	0	0	0
478	0	0	0	0	0	0	0	0	0	0	0	0	0	-0.00050979312594949	0	0	0	0	0	0	0	0	0	0	0	0	0	0	0	0	0	0	0	0	0	0	0	0	0	0	0	0	0	0	0	0	0	0	0
479	0	0	0	0	0.0137878521557039	-0.0107146683810136	0	0	0	0	0.0030731837746903	0	0	0	0	-0.00509432307088219	0	0	0.017913080408892	0.0188821752265861	0	0	0	0	0.043910718002553	0	0	0.03267002738229	0	0	0.00562034531013141	0.0188821752265861	0	0.0188821752265861	0.0408375342278625	0	-0.0321440051430408	0.016335013691145	0	0	0	0	0	-0.0107146683810136	0.0566465256797583	0.016335013691145	0	0	0
480	0	0	0	0.00135718034601475	0	0	0	0	0	-0.00529268550862708	0	0	0	0.00400352310032829	0	-0.00264634275431354	0	-0.00793902826294062	0	-0.00264634275431354	-0.00393550516261233	0	-0.00529268550862708	0	0.00800704620065658	0	0	0.00400352310032829	0	0	0	-0.00264634275431354	-0.00529268550862708	0	0	-0.00264634275431354	0	-0.00393550516261233	-0.00264634275431354	-0.0132317137715677	0.0027143606920295	0	-0.00264634275431354	0	0	-0.00264634275431354	0	0	-0.00529268550862708
481	0	0	0	0	0	0	0	0	0	0	0	0	0	0	0	0	0	0.00611695620259359	0	0	0	0	0	0	0	0	0	0	0	0	0	0	0	0	0	0	0	0	0	0	0	0	0	0	0	0	0	-0.00115791667631597	0
482	0	0	0	0	0	0	0	0	0	0	0	0	0	0	0	-0.000167963061563501	0	0	0	0	0	0	0	0	0	0	0	-0.000167963061563501	0	0	0	0	0	0	0	0	0	0	0	0	0	0	0	0	0	0	0	0	0
483	0	0	0	0	0	0	0	0	0	0	0	0	0	0	0	0	0	0	0	0	0	0	-0.00751766651631334	0	-0.00751766651631334	0	0	0	0	0	0	0	0	0	0	0	0	0	0	-0.00751766651631334	0	0	0	0	0	0	0	0	0
484	0	0	0	0	0	0	0	0	0	0	0	0	0	0	0	0	0	0	0	0	0	0	0	0	0	0	0	0	0	0	0	0	0	0	0	0	0	0	0	0	0	0	-0.00122947577145676	0	0	0	0	0	0
485	0	0	0	0	0	0	0	0	0	0	0	0	0	0	0	-0.0087404947120007	0	0	0	0	0	0	0	0	0	0	0	0	0	0	0	0	0	0	0	0	0	0	0	0	0	0	0	0	0	0	0	0	0
486	0	0	0	0	0	0	0	0	0	0	0	0	0	0	0	0	0.00307451076847397	0	0	0	0	0	0	0	0	-0.00106614354556698	0	0	0	0	0	0	0	0	0	0	0	0	0	0	0	0	-0.00106614354556698	0	0	0	0	0.00153725538423698	0
487	0	0	0	0	0	0	0	0	0	0	0.0627845946706193	0	0	0	0	0	0	0	0	0	0	0	0.125569189341239	0	0	0	0	0	0	0	0.306417538439248	-0.0552791597567717	0	0	0.007505434913848	0	0	-0.080536579858154	0	0	-0.221116639027087	0	0	-0.143321174528773	0	0.0627845946706193	0	0.384213002937562	0
488	0	0	0	0	0	0	0	0	0	0	0	0	0	0	0	0	0	0	0	0	0	0	0	0	0	0	0	0	0	0	0	0	0	0	0	0	0.000229003501671696	0	0	0	0	0	0	0	0	0	0	0	0
489	0	0.0259605399792316	0	0.0259605399792316	0	-0.00985221674876847	-0.0197044334975369	0	0	0	0.0259605399792316	-0.00985221674876847	0	-0.0197044334975369	0.0680294031889262	0	0.0259605399792316	0	0.171871563105853	-0.0197044334975369	0.0259605399792316	-0.00985221674876847	0	-0.00985221674876847	0	0	-0.00985221674876847	0.0125122129633892	0.0483249696913893	-0.00985221674876847	-0.0197044334975369	0	0.0259605399792316	0.0519210799584631	0	0.0161083232304631	0	0.0259605399792316	0	0	0.0259605399792316	-0.0295566502463054	0.0259605399792316	0	0.0161083232304631	0	0	-0.00985221674876847	0.0519210799584631
490	0	0	0	0	0	0	0	0	0	0	0	0	0	0	0	0	0	0	0	0	0	0	0	0	0	0	0	0	0	0	0	0	0	0	0	0	0	0	0	0	0	0	0	0	0	0	0	0	0
491	0	0	0	0	0	0	0	0	0	0	0	0	0	0	0	0	0	0	0	0	0	0	0	0	0	0	0	0	0	0	0	0	0	0	0	0	0	0	0	0	0	0	0	0	0	0	0	0	0
492	0	1.1335052251313	-0.108446800819376	0	-0.060248222677431	0	0	-0.277141824316183	0	0	0	0	0	0	0	0	0	0	0	0	0	0	0	0	0	0	0	0	0	0	0	0	0	0	0.0426985482493595	0	0	0	0	0	0	0	0	-0.0240992890709724	0	0	0	0	0
493	0	-0.0134934556739981	0	0	0	0	0	0	0.0218627022299956	0	0	0	0	0	0	0	0	0	0	0	0	0	0	0	0	0	0	0	0	0	0	0	0	0	0	0	0	0	0	0	0	0	0	0	0	0	0	0	0
494	-0.038523477556836	0.00833525114893599	0.010816971967423	-0.010053139251537	-0.386477386562037	0.041460020102046	0.023099031132643	0.0134988373115356	-0.0103955408095395	0.00376490109063	0.0080272683701409	0.0266922173390865	0.024935887678026	-0.0164046048449396	0.00838135925405201	0.042452426984996	0.011533289355975	-0.137835495131812	0.002709176712959	-0.019015017073604	-1.72333023245225	-0.56650848499479	0.010988217777536	0.024600034394087	0.053347959478227	0.01666647951862	0.030784367018854	0.021243936987287	-0.012512040554502	0.00130544065136801	0.018721159053306	0.028685076663495	0.075513878443386	0.05001617887139	0.042645933174335	0.022347266754515	0.032930234553402	0.021513947281694	0.023860428415941	0.255258136203977	0.167327987121499	0.094682372801204	0.00068283675748998	-0.0167136158341047	-0.025556994287462	0.0026154632182859	-0.0180747974957597	-0.093517781959993	0.0147237510785809
495	0	0	0	0	0	0	0	0	0	0	0	0	0	0	0	0	0	0	0	-0.00430098277456399	0	0	0	0	0	0	-0.00430098277456399	0	0	0	0	0	0	0	0	0	0	0	0	0	0	0	0	0	0	0	0	0	0
496	0	0	0	0	0	0	0	0	0	0	0	0	0	0	0	0	0	0	0	0	0	0	0	0	0	0	0	0	0	0	0	0	0	0	0	0	0	0	0	0	0	0	0	0	0	0	-0.010527423939362	0	0.0183755972069092
497	0	0	0	0	0	0	0	0	0	0	0	0	0	0	0	0	0	0	0	0	0	0	0	0	0	0	0	0	0	0	0	0	0	0	0	0	0	0	0	0	0	0	0	0	0	0	0	0	0
498	0	0	0	0	0	0	0.00789265982636148	0	0	0	-0.00315030085373153	0	0	0	-0.00315030085373153	0	0	0	0	0	-0.00945090256119459	0	0	0	0	0	0	0	0	0	0	0	0	-0.00315030085373153	0	0	0	0	0	0	0	0	0	0	0	0	0	0	0
499	0	0	0	0	0	0	0	0	0	0	0	0	0	0	0	0	0	0	0	0	0	0	0	0	0	0	0	0	0	0	0	0	0	0	0	0	0	0	0	0	0	0	0	0	0	0	0	0	0
500	0	0	0	0	0	0	0	0	0	0	0	0	0	0	0	0	0	0	0	0	0	0	0	0	0	0	0	0	0	0	0	0	0	0	0	0	0	0	0	0	0	0	0	0	0	0	0	0	0
501	0	0	-0.13867547492131	-0.0587659157688541	0.151417670602818	0	0	-0.019588638589618	0.0376222723852521	0.351969070880951	0	0	0.07368953997652	2.52781874097674	0.186556357132276	0	0	-0.0587659157688541	2.05831783855808	-0.025808657765554	0	0	0.0752445447705041	-0.039177277179236	0.0376222723852521	0.898269522864102	2.94198800361704	-0.021143643383602	0.99899845899762	0.0556559061808861	0.0149236242076659	2.49237789711764	0.720416770763554	2.1920261417678	0.249360863550909	-0.0618759253568219	-0.0015550047939839	6.1397263928532	0.095761764421933	-0.104163212124026	-1.4842483910122	0.004967171711589	-0.02425365297157	-4.96311838155691	0.0901681689781699	0.0752445447705041	-7.44746331552076	-0.241283682251352	-1.38116115376934
502	0	0	0	0	0	0	0	0	0	0	0	0	0	0	0	0	0	0	0	0	0	0	0	0	0	0	0	0	0	0	0	0	0	0	0	0	0	0	0	0	0	0	0	0	0	0	0	0	0
503	0	0	0	0	0	0	0	0	0	0	0	0	0	0	0	0	0	0	0	0	0	0	0	0	0	0	0	0	0	0	0	0	0	0	0	0	0	0	0	0	0	0	0	0	0	0	0	0	0
504	0	-0.00334492908750334	0	0	0	-0.00167246454375167	0.00340078217990138	0	0.00172831763614971	0	0	0.00340078217990138	-0.00167246454375167	0	0	0	0	0	0	0	0	0	0	0	0	0	0	0	0	0	0	0	0	0	0	0	0	0	0	0	0	0	0	0	0	0	0	0	0
505	0	0.000375161319367328	0	0	0.00163676634753316	0	0	0	-3.4306393079876e-05	-0.000204733856223602	-0.000614201568670806	-0.000443774105527081	0.000750322638734656	0	0	0	-0.00051238689168684	0	0	0.000375161319367328	0	-0.000614201568670806	-0.000409467712447204	-0.00102366928111801	0	0	0	0	0	0	0	0	-0.000204733856223602	0	-0.000818935424894409	0	0	0	0	0	0	0	0	0	0	0	0	0	0
506	-0.019808368022382	0.0985590309286242	0.089687741973476	0.000183361957586003	-0.0711536735987779	0.136901467325704	-0.02867965697753	0.11235339057234	0.0125781026300885	-1.00161535288879	-0.178400631524965	-0.114052456769252	-0.074252358766904	0.037309541341037	0.0125781026300885	0	0	-0.0068054988430652	0	0	0	0	-0.0136109976861304	0	0	0.0193836014731537	0	0	0	0.0057726037870233	0	0.0115452075740466	0.083065605087996	0.08142458152514	0.353403130656106	0.194202738646709	0.174211008666742	0.091512127493917	0.064714898670884	-0.145830798914909	0.032753194567642	-0.116118246881336	0.128454944919783	0.0472137253522284	-0.034027494215326	0.025156205260177	0	-0.0136109976861304	0.0115452075740466
507	0	0	0	0	0	0	0	0	0	0	0	0	0	0	0	0	0	0	0	0	0	0	0	0	0	0	0	0	0	0	0	0	0	0	0	0	0	0	0	0	0	0	0	0	0	0	0	0	0
508	0	0	0	0	0	0	0	0	0	0	0	0	0	0	0	0	0.00103036485219416	0	0	0	0	0	0	0	0	0	0	0	0	0	0	0	0	0	0	0	0	0	0	0	0	0	0	0	0	0	0	-0.000266628272195471	0
509	0	0	0	0	0	0	0	0	0	0	0	0	0	0	-0.000289724066798781	0	0	0	0	0	0	0	0	-0.000289724066798781	0	0	0	0	0	6.44212639338429e-05	0	0	0	-0.0014486203339939	0	0	0	0	0	0	0	0	0.000354145330732624	0	0	0.000643869397531405	0	-0.0014486203339939	0
510	0	-0.00589448865310934	0	0	0	0	-0.00589448865310934	0	0	0	0	0	0	0	0	0	0	0	0	0	0	0	0	0	0	0	0	0	0	0	0	0	0	0	0	0	0	0	0	0	0	-0.0117889773062187	0	0	0	0	0	0	0
511	0	0	0	0	0	0	0	0	0	0	0	0	0	0	0	0	0	0	0	0	0	0	0	0	0	0	0	0	0	0	0	0	0	0	0	0	0	0.00432301573577728	0	0	0	0.015268017280639	0	0	0	0	0	-0.00404809132494029	0
512	0	0	0	0	0	0	0	0	0	0	0	0	0	0	0	0	0	0	0	0	0	0	-0.000140535183937202	0	0	0	0	0	0	0	0	0	-0.000414941202831559	0	0	0	0	0	0.000481876620310136	0	0	0	0	0	0	0	0	0	-0.000207470601415779
513	0	0	0	0	0	0	0	0	0	0	0	0	0	0	0	0	0	0	0	0	0	0	0	0	0	0	0	0	0	0	0	0	0	0	0	0	0	0	0	0	-0.0115707260630605	0	0	0	0	0	0	0	0
514	-0.0149432157800359	0	0	0	0	0	0	0	0	0	0	0	0	0	0	0	0	0	0	0	0	0	0	0	0	0	0	0	0	0	0	0	0	0	0	0	0	0	0	0	0	0	0	0	0	0	-0.0149432157800359	0	0
515	0	0	0	0	0	0	0	0	0	0	0	0	0	0	0	0	0	0.00591961167347422	0	0	0	0	0	-0.00392618767177071	0	0	0	0	-0.00392618767177071	0	0.00591961167347422	0	0	0.00591961167347422	0	0	0	0	0	0	0	0	0	0	0	0	0	0	0
516	0	0	0	0	0	0	0	0	0	0	0	0	0	0	0.0077364448728748	0	0	0	-0.0130612624708847	0	0	0	0.0035553027340278	0	0	0	0.0223245771866334	0	0	-0.00151059683681022	-0.00302119367362045	0	0	-0.0105741778576716	0	0	0	0	0.0035553027340278	0	0	-0.00453179051043067	0	0	-0.00044237871599552	0	0	0.0035553027340278	0
517	-0.00397408894011048	-0.00542285176768614	-0.00397408894011048	-0.0158963557604419	0.00902474116518002	0.00649941505264526	0.025997660210581	0	-0.00397408894011048	0	-0.00794817788022096	-0.0238445336406629	-0.0057950513103028	-0.0014487628275757	0	-0.00397408894011048	0	0	0	0	0	0	0	0.0021531265699181	0.0205748084428949	0.0194982451579358	0.0021531265699181	-0.0014487628275757	0	0	-0.00794817788022096	0.0129988301052905	-0.00397408894011048	0	0	-0.00939694070779664	-0.0278186225807734	-0.00397408894011048	0	0	0	-0.0133710296479071	0	-0.0083203774228376	-0.00939694070779664	-0.00397408894011048	0	0	0
518	0.00287418265430768	0	0	0	0	0	0	0	0.00302507230271262	-0.000680823251475684	0	-0.00136164650295137	0	0	0	0	0.00083171289988063	0	0	0.00310051712691509	0.00287418265430768	7.544482420247e-05	0	0	0	0	0	0	0	0	0	0.00151253615135631	0	0.0027969179964518	0.00294962747851015	0.0018143154481662	0	-0.00242151370909285	0	0	0	0	0	0	-0.000680823251475684	0	-0.000680823251475684	0	-0.00204246975442705
519	0	0	0	0	0	0	0	0	0	0	0	0	0	0	0	0	0	0	0	0	0	0	0	0	0	0	0	0	0	0	0	0	0	0	0	0	0	0	0	0	0	0	0	0	0	0	0	0	0
520	0.0197361934758991	0	0	0.0594883997620464	0	0	0	0	0	0	-0.0454557578245821	0	0	-0.130663721935312	0	0	-0.0200160128102482	0	0	0	-0.0100080064051241	0	0	0	0	0.0594883997620464	0	0	0	0	0	0	0	0	0	0	0	0.0048640935353875	0	0	0	0	0	0	0	-0.0100080064051241	0	-0.0100080064051241	0
521	0	0	-0.00297176820208024	0	0	0	-0.00297176820208024	0	-0.0295651442967015	0	0	0	0	0	0	0	0	0	0	0	0	0	0	0	0	0	0	-0.00297176820208024	0	0	0	0	0	0	0	0	0	0	0	0	0	0	0	0	0	0	0	0	0
522	0	0	-0.00764292265362275	0.0116333178222429	0	0	0	0	0	0	0	0	0	-0.00764292265362275	0	0	0	0	0	0	-0.00764292265362275	0	0	0	0	0	0	-0.00764292265362275	0.0116333178222429	-0.00764292265362275	0	0	0	0.0232666356444858	0	0	0	-0.0152858453072455	0	0	0	0	0	0	0	-0.00764292265362275	0	0	0
523	0.0019085287493436	0	-0.00558253782169374	0	-0.00558253782169374	0	0	0	-0.0111650756433875	0	-0.00558253782169374	-0.022330151286775	0	0	0	0	0	0.0130736043927311	0.000143048426337	0	-0.0111650756433875	-0.022330151286775	-0.0167476134650812	-0.00558253782169374	0	0.0019085287493436	0	0	0	0.0019085287493436	0	0	0	-0.0111650756433875	0.00749106657103736	-0.0111650756433875	-0.00558253782169374	-0.0167476134650812	0.0130736043927311	0	0	-0.00558253782169374	0	0	0	-0.00558253782169374	0	0	0
524	0	0	0	0	0	0	0	0	0	0	-0.0168067226890756	0	0	0	0	0	0	0	0	0	0	0	0	0	0	0	0	0	0	0	0	0	0	0	0	0	0	0	0	0	0	0	0	0	0	0	0	0	0
525	0	0	0	-0.00936504963476306	-0.0374601985390523	0	0	0	0	0	-0.00936504963476306	0	0	0	-0.0187300992695261	0	-0.0280951489042892	-0.00936504963476306	0	0	0	0	0	-0.00936504963476306	0	0	0	0	0	0	0	0	0	-0.00936504963476306	0	0	0	0	0	0	0	0	0	0	0	0	0	0	0
526	0	0	0	0	0	0	0	0	0	0	0	0	0	0	0	0	0	0	0	0	0	0	-0.000731587764926219	0	0	0	0	0	0	0	0	0	0	0	0	0	0	0	0	0	0	0	0	0.00155617802676626	0	0	0	0	0
527	-0.0228571428571429	0	-0.00380952380952381	0	0	0	0	0	0	0	0	-0.00761904761904762	0	0	0	0	0	0	-0.00380952380952381	-0.0152380952380952	0	0	0	0	0	0	0	0	0	0	0	0	0	0	0	0	0	0	0	0	0	0	0	0	0	-0.00761904761904762	0	0	0
528	0	0	0	0	0	0	0	0	0	0	0	0	0	0.00389924354675193	-0.00221906621693591	0	0	0	0	0	0	0	0	0	0	0	0	0	0	0	0	0	0	0	0	0	0	0	0	0	0	0	0	0	0	0	0	0	0
529	0	0	0	0	0	0	0.0016178088397075	0	-0.000836540070269366	0	0	0	0	0	0.00156253753887627	0	0.00401688644885313	0	0	0	0	0	0	0	0	0	0	0	0	-0.000836540070269366	0	-0.000836540070269366	0	0	-0.000836540070269366	0	0	-0.000836540070269366	0	-0.000836540070269366	0	0	-0.0050192404216162	0	0	0	0	0	0.00619487885467384
530	0	0	0	0	0	0	0	0	0	0	0	0	0	0	0	0	0	0	0	0	0	0	0	0	0	0	0	0	0	0	0	0	0	-0.00552333609500138	0	0	0	0	0	0	0	0	0	0	0	0	0	0	0
531	0	-0.013051422605064	0	0	0	0	0	0	0	0	0	0	0.00935366195865681	0	0	0	0	0	0	0	0	0	0	0	0	-0.00435047420168798	0	0	0	0	0	0	-0.00870094840337597	0	0	0	-0.00435047420168798	-0.00804823484809509	0	0	0.0119645161797802	0	0.0680864879317211	0	0	0	-0.00870094840337597	0	0.00065271355528084
532	0	0.000631711939355654	0	0	0	0.000315855969677827	0	0	0	0	-0.000103491023184887	-0.000209673496431357	0	0	0	0	0	0	0	-0.000209673496431357	0	0	0	0	0	-0.000419346992862714	0	0	0	0	0	0	0	0	0	0	0	0	0	0	0	0	0	0	0	0	0	0	0
533	-0.010465724751439	-0.0313971742543171	0	0	0	0	-0.010465724751439	0	0	0	-0.0350242846374873	-0.010465724751439	0	0	0	0	0.0416550958067204	0	0	0	0.0068386143682688	0.0136772287365377	0	0	-0.000415606398071589	0	0.044866599791819	0	0	0	0	-0.179164139968679	-0.0209314495028781	0	-0.315634168135457	-0.0313971742543171	0	0	0	0	0	0	-0.000207803199035697	0	0	0	0	0	0.0034193071841345
534	0	0.00153334253338853	0	0	0	0	0	0	0	0	0	0	0.00306668506677707	-0.00102692599971246	0	0	0	0	0	-0.00102692599971246	0	0	0	0	0	0	-0.00308077799913738	0	0	0	0	0	0	0.00153334253338853	0	0	0	0	0	0	0	0	0	0	0	0	0	0	0
535	0	0	0	0	0	0	0	0	0	0	0	0	0	0	0	0	0	0	0	0	0	0	0	0	0	0	0	0	0	0	0	0	0	0	0	0	0	0	0	0	0	0	0	0	0	0	0	0	0
536	0	0	0	0	0	0	0	0	0	0	0	0	0	0	0	0	-0.00412643393579269	0	0	0	0	0	0	0	0	0	0	0	0	0	-0.00206321696789634	0	0	0	0	0	0	0	0	0	0	0	0	0	0	0	0	0	0
537	0	0	0	-0.159235668789809	0	-0.0796178343949045	0	-0.0796178343949045	0	0	0	0	0	-0.0398089171974522	-0.134777528295835	-0.119426751592357	0.0321335288457133	-0.318471337579618	-0.0398089171974522	0	0.033565504284471	0.0719424460431655	-0.0398089171974522	-0.00767538835173899	0	-0.0398089171974522	0	0	0	0	0	0	0.024458140493974	0	0	-0.199044585987261	0	-0.0398089171974522	0	0	0	0	0	-0.021594189616459	0	0	-0.398089171974522	0	0
538	0	0	0	0	0	0	0	0	0	0	0	0	0	0	0	0	0	0	0	0	0	0	0	0	0	0	0	0	0	0	0	0	0	0	0	0	0	0	0	0	0	0	0	0	0	0	0	0	0
539	0	0	0	0	0	0	0	0	0	0	0	-0.010058844238797	0	0	0	0	0.00634558030331874	0	0	0.0126911606066375	0	0	0	0	0	0	-0.00502942211939848	0	0	0	0	0	0	0	0	0	0	0	0	0	0	0	0	0	0	0	0	0	0
540	0	0	0	0	0	0	0	0	0	0	0	0	0	0	0	0	0	0	0	0	0	0	0	0	0	0	0	0	0	0	0	0	0	0	0	0	0	0	0	0	0	-0.00846023688663283	0	0	0	0	0	0	0
541	0.00706065099202146	0	0	0.00706065099202146	0	0	0	0	0	0	0	0	0	0	0	0	0	0	0	0	0	0	0	0	0	0	0	0	0	0	0	0	0	0	-0.00283342305839685	0.00706065099202146	0	0	0	-0.00283342305839685	0	0	0	0	-0.00283342305839685	0	0	0	0
542	0	0	0	0	0	0	0	0	0	0	0	0	0	0	0	0	0	0	0	0	0	0	0	0	0	0	0	0	0	0	0	0	0	0	0	0	0.00657678395264716	0	0	0	0	0	0	0	0	0	0	0	0
543	0	0	0	0	0	0	0	0	0	0	0	0	0	0	0	0	0	0	0	0	0	0	0	0	0	0	0	0	0	0	0	0	0	0	0	0	0	0	0	0	0	0	0	0	0	0	0	0	0
544	0	0	0	0	-0.000291303144617446	0	0	0	-0.000291303144617446	0	0	0	0	0	0	0	0	0	0	0	0	0	0	0	0	0	0	0	0	0	0	0	0	0	0	0	0	0	0	0	0	0	0	0	-0.000273067052834151	0	0	0	0
545	-0.00604448742746615	0	0.00628520864552565	-0.00302224371373308	0	0	0	0	0	0	0	0	0	0	0	0	0.0061648480364959	0	0	0	0	0	0.0187352653275472	0	0	0	0	0	0	0	0	0	0	0	0	0	0	0	0	0	0	0	0	0	0	0	0	0	0
546	0	0	0	0	0	0	0	0	0	0	0	0	0	0	0	0	0	0	0	0	-0.000965605144744211	0	0	0	0	0	0	0	0	0	0	0	0	-0.000965605144744211	0	0	0	0	0	0	0	0	0	0	0	0	0	0	0
547	0	0	0	0	0	0	0	0	0	0	0	0	0	0	0	0	0	0	0	0	0	0	0	0	0	0	0	0	0	0	0	0	0	0	0	0	0	0	0	0	0	0	0	0	0	0	0	0	0
548	0	0	0	0	0	0	0	0	0	0	0	0	0	0	0	0	0	0	0	0	0	0	0	0	0	0	0	0	0	0	0	0	0	0	0	0	0	0	0	0	0	0	0	0	0	0	0	0	0
549	0	0	0	0	0	0	0	0	0	0	0	0	0	0	0	0	0	0	0	0	0	0	0	0	0	0	-0.000213882011988087	0	0	0	0	0	0	0	0	0	0	0	0	0	0.000127595971105767	0	0	0	0	0	0	0	0
550	0	0	0	0	0	0	0	0	0	0	0	0	0	0	0	0	0	0	0	0	0	0	0	0	0	0	0	0	0	0	0	0	0	0	0	0	0	0	0	0	0	0	0	0	0	0	0	0	0
551	0	0	0	0	0	0	-0.00585240241118979	0	0	0	0	0	0	0	0	0	0	0	0	0	0	0	0	0	0	0	0	0	0	0	0	0	0	0	0	0	0	0	0	0	0	0	0	0	0	0	0	0	0
552	0	0	0	-0.00146993973247097	0	0	0	-0.00146993973247097	0	0	0	0	0	0	0	0	0.0212883722910546	0	0.00278773472573996	0	0	0	0.00425767445821093	0	0	0	0	0	0.0139386736286998	0	0	0.00278773472573996	0	0	-0.00293987946494194	0	-0.00146993973247097	0	0	0	0	0	0	0	0	0	0	0	0
553	0	0	0	0	-0.0055755345543754	0	0	0.0092968248678274	0	0	0	0	0	0	0	0	0	-0.0027877672771877	0	0	0	0	0	0	0	0	0	0	-0.0027877672771877	0	0	0	0	0	0	0	0	0	0	0	0.0120845921450151	0	0	-0.0027877672771877	0	0	0	0	-0.0027877672771877
554	0	0	0	0	-0.0276701715550636	-0.00922339051835455	0	0	-0.0437477469507133	-0.0461169525917727	0	-0.0253009659140042	-0.0184467810367091	-0.0068541848772951	-0.0368935620734182	0	0.0208159866777685	0.0440011789965965	-0.00922339051835455	0	-0.00922339051835455	0	0	0	0	-0.00922339051835455	0	0.0440011789965965	0	0	0	-0.00922339051835455	0.0208159866777685	-0.0184467810367091	-0.0276701715550636	0	0.0115925961594139	0	0	-0.0184467810367091	0	-0.00922339051835455	0	-0.00922339051835455	0	-0.0184467810367091	0.0208159866777685	0	0
555	0	0	0	0	0	0	0	0	0	0	0	0	0	0	0	0	0	0	0	0	0	0	0	0	0	0	0	0	0	0	0	0	0	0	0	0	0	0	0	0	0	0	0	0	0	0	0	0	0
556	0	0	0	0	0	0	0	0	0	0	0	0	0	0	0	0.00371457226700345	0	0	0	0	0	0	0	0	0	0	0	0	0	0	0	0	0	0	0	0	0	0	0	0	0	0	0	0	0	0	0	0	0
557	0	0	0	0	0	0	0	0	0	0	0	0	0	0	0	0	0	0	0	0	0	0	0	0	0	0	0	0	0	0	0	0	0	0	0	0	0	0	0	0	0	0	0	0	0	0	0	0	0
558	0	0	0	0	0	0	0	0	0	0	0	0	0	0.0114979317573511	0	0	0	0	0	0	0	0	0.0114979317573511	0	0	0.160971044602916	0	-0.00909090909090909	0	0	0	0	0	0	0.002407022666442	0	-0.0248657046062853	0	0	0	-0.00909090909090909	-0.109090909090909	0	0	-0.0564152956370373	0	0	0	0
559	0	0	-0.0106674252391281	0	0	0	0	0	0	0	0	0	0	0	0	0	0	0	0	0	0	0	0	0	0	0	0	0	0	0	0	0	0	0	0	0	0	0	0	0	0	0	0	0	0	0	0	0	0
560	0	0	0	0	0	0	0	0	0	0	0	0	0	0	0	0	0	0	0	0	0	0	0	0	0	0	0	0	0	0	0	0	0	0	0	0	0	0	0	0	-0.000184552239356872	0	0	0	0	0	0	-0.000184552239356872	0
561	0	0	0	0	0	0	0	0	0	0	0	0	0	0	0	0	0	0	0.0685635927322592	0	0	-0.0190367409099562	0	0	0	0	0	0	0	0.0342817963661296	0	0	-0.0190367409099562	0	0	0	0	0	0	0	0	0	0	0	0.0762252772808669	-0.0380734818199124	0	-0.0571102227298686	0
562	0	-0.00577000750100975	0.00735984821138432	-0.0317350412555536	0.00959727044182395	-0.0074180743909611	-0.0173100225030293	0.0111871111521985	0.0147196964227685	-0.00288500375050488	0	0.0060646851712539	0	-0.0115400150020195	0	0.00512242598094458	-0.00288500375050488	0.0102448519618892	-0.00064758152006517	0	0.0022374222304397	0	-0.00288500375050488	0	0	0.0102448519618892	0	0	0	-0.00288500375050488	0	-0.00288500375050488	0	0	-0.00288500375050488	0	0	0	0	0	0	0	0	0	0	0	0	0	0
563	0	0	0	0	0	0	0	0	0	0	0	0	0	0	0	0	0	0	0	0	0	0	0	0	0	0	0	0	0	0	0	0	0	0	0	0	0	0	0	0	0	0	0	0	0	0	0	0	0
564	0	0	0	0	0	0	0	0	0	0	0	0	0	0	-0.00308908933646361	0	0	0	0	0	0	0	0	0	0	0	0	0	0	0	0	0	0	0	0	0	0	0	0	0	0	0	0	0	0	0	0	0	0
565	0	0	0	0	0	0	0	0	0	0	0	0	0	0	0	0	0	0	0	0	0	0	0	0	0	0	0	0	0	0	0	0	0	0	0	0	0	0	0	0	0	0	0	0	0	0	0	0	0
566	0.0369471315078394	0	-0.00111795548301267	0	0.00040121983566243	-0.00111795548301267	0	0	0.00415630612036286	0	-0.00103225145903804	-0.00111795548301267	-0.00630651306241357	0.000973847719274099	-0.010061599347114	0	0	0	0	-0.00966037951145154	-0.00111795548301267	0	0	0	0	0	0	0	0	0	0	0	0	0	0	0	0	0	0	0	0	0	0	0	0	0	0	0	0
567	-0.0203873598369011	0	0.0448631673396142	0	-0.0203873598369011	0	0	0	0	0	0	0	0	0	-0.0203873598369011	0	-0.0407747196738022	0	0	0	0	0	0	0	0	0	0	0	0	0	0	0	0	0	0	0	0	0	0	0	0	0	0	0	0	0	0	0	0
568	0	0	0	0.00973994350832765	0	0	0	0	0	0	0	0	0	0	0	0	0	0	0	0	0	0	0	0	0	0	0	0	0.0177677210531781	0	0	0	0	0	0	-0.00529801324503311	0	0	0	-0.000856082981738549	0	0	0	0	0	0	0	0	0
569	0.0334057123768164	0	0	0	0	0	0.0167028561884082	0	0	-0.0195026816187226	0	0	0	0	-0.0292540224280839	0	-0.0195026816187226	0	0	0	-0.0195026816187226	0	0	0	0	0	0	0	0	0.0167028561884082	0	0	0	0.0167028561884082	-0.0195026816187226	0	0.0167028561884082	0	-0.0195026816187226	0	0	0	0	-0.00975134080936129	0	0	0	0	0.0167028561884082
570	0	0	0	0	0	0	0	0	0	0	0	0	0	0	0	0	0	0	0	0	0	0	0	0	0	0	0	0	0	0	0	0	0	0	0	0	0	0	0	0	0	0	0	0	0	0	0	0	0
571	0	0	0	0	0	0	0	0	0	0	0	0	0	0	0	0	0	0	0	0	0	0	0	0	0	0	0	0	0	0	0	0	0	0	0	0	0	0	0	0	0	0	0	0	0	0	0	0	0
572	-0.194552529182879	0.193881369099454	-0.12970168612192	0	0.323247475179661	0	-0.0648508430609598	0	0	-0.0648508430609598	0	0	-0.12970168612192	-0.0648508430609598	0	-0.194552529182879	0	-0.194552529182879	0.258732212160414	0	0	0	0	0	-0.259403372243839	0	-0.0648508430609598	0	0	0	0	0	0	0	0	0	0	0	0	0	-0.194552529182879	0	0	0	0	0.129366106080207	0	0	0
573	0	0	-0.00789265982636148	0	0	-0.015785319652723	0	0	0	0	0	0	0	0	0	-0.00789265982636148	0	0	0	0	0	0	0	0	0	0	0	0	0	0	0	0	0	0	0	0	0	0.0066894106629206	0	0	0	0	0	0	0	0.0188649828253209	0	-0.0406665482952483	0
574	0	0	0	0	-0.00204056646124964	0	0	0	0	0	0	0	-0.00204056646124964	0	-0.00204056646124964	0	0	-0.00408113292249929	0	0	0	-0.00204056646124964	0	0	0	0.00625762648227527	-0.00204056646124964	0	0	0	0	0	0	0	-0.00408113292249929	0	0	0	0	0	0	0	0	0	0	0	0	0	0
575	0	0	0	0	0	0	0	0	0	0	0	0	0	0	0	0	0	0	0.00243457090687766	0	0	0	0	0	0	0	0	0	0	0	0	0	0	0	0	-0.0012480343459052	0	0	0	0	0	0	-0.0024960686918104	0	0	0	0.0132363955254953	0	0
576	0	0	0	0	0	0	0	0	0.000878780955059142	0	0	-0.000587236991232552	0	0	0	-0.000587236991232552	0	-0.000587236991232552	-0.000295693027405958	0	0	0	0	0	0	-0.000587236991232552	0	0.000878780955059142	0	0	0	0.000878780955059142	-0.000587236991232552	0.00350682569307783	0.00028739490024722	0	0	0	0	-0.0006204294998675	-0.000587236991232552	0	0	-0.0152723108356257	0	0.000878780955059142	-0.0120487309792157	0	-0.00910424789589424
577	0	0	0	0	0	0	0	0	0	0	0	0.00211222237477162	0	0	0	0	0	0	0	0	0	-0.00104337286440846	0	0	0	0	0	0	0.00105611118738581	0	0	0	0	0	0	0	0	0	0	-0.000524871012948568	0	0	0.00105611118738581	0	-0.00104974202589714	0	0	-0.0015746130388457	0
578	-0.053419276598335	-0.00343088482519642	0.0154796085080505	0	0.00466200466200466	-0.0205853089511785	-0.0045807510726713	0.00123111983680824	0	0.00246223967361648	0	-0.183430457764008	-0.0558628023547226	-0.0256910093943065	0.00712424433562116	0	0.0058931244988129	-0.0137235393007857	-0.00343088482519642	0	-0.00343088482519642	-0.0171544241259821	0	-0.0188292397439137	0.0186480186480186	-0.00343088482519642	0	0	-0.0262159587647631	0	0	-0.00343088482519642	0	0	0	0	-0.00343088482519642	-0.0102926544755893	0	0	-0.00686176965039284	-0.00343088482519642	0	0.00246223967361648	0.0186480186480186	0	0	-0.00686176965039284	0
579	0	0	0	0	0	0	0	0	0	0	0	0	0	0	0	0	0	0	0	0	0	0	0	0	0	0	0	0	-0.00021226621756941	0	0	0.00206496375988601	0	0	0	0	-0.00227722997745542	0	0	0	0	-0.00341584496618313	0.00206496375988601	0	0	0	0	0	0
580	0	0	0	0	0	0	0	0	0	0	0	0	0	0	0	0	0	0	0	0	0	0	0	0	0	0	0	0	0	0	0	0	0	0	0	0	0	0	0	0	0	0	0	0	-0.00246737322289101	0	0	0	0
581	-0.0534302201325069	0.015752993068683	0	0	-0.311551714594955	-0.0106860440265014	0	0	-0.0106860440265014	0	0	0.015752993068683	0	0.0315059861373661	0	0	0	0	0	-0.0320581320795042	0	0	0	0	0	0	0	0	-0.0106860440265014	0	0	-0.0320581320795042	0	0	0	0	-0.0163051390108212	0	-0.000552145942138101	0	0	0	0	0	0	0	0	-0.0534302201325069	0
582	0	0	0	0	0	0	0	0	0	0	0	0	0	0	0	0	0	0	0	0	0	0	0	0	0	-0.000579119275405963	0	0	0	0	0	0	0	0	0	0	0	0	0	0	0	0	0	0	0	0	0	0	0
583	0	0	0	0	0	0	0	0	0	0	0	0	0	0	0	0	0	0	0	0	0	0	0	0	0	0	0	0	0	0	0	0	0	0	0	0	0	0	0	0	0	0	0	0	0	0	0	0	0
584	0	0	0	0	0	0	0	0	0	0	0	0	0	0	0	0	0	0	0	0	0	0	0	0	0	0	0	0	0	0	0	0	0	0	0	0	0	0	0	0	0	0	0	0	0	0	0	0	0
585	0	0	0	0	0	0	0	0	0	0	0	0	0	0	0	0	0	0	0	0	0	0	0	0	0	0	0	0	0	0	0	0	0	0	0	0	0	0	0	0	0	0	0	0	0	0	0	0	0
586	0	0	0	0	0	0	0	0	0	0	0	0	0	-0.0241390408754425	0	0	0	0	0	0	0	-0.00804634695848085	0	0	0	0	0	0	0	0	-0.00804634695848085	0	0	0	0	0	0	0	0	0	0	0	0	0	0	0	0	0	0
587	0	0	0	0	0	0	0	0	0	0	0	0	0	0	0	0	0	0	0	0	0	0	0	0	0	0	0	0	0	0	0	0	0	0	0	0	0	0	0	0	0	0	0	0	0	0	0	0	0
588	0	0	0	0	0	0	0	0	0	0	0	0	-0.0153539075694764	0	0	0	0	0	0	0	0	0	0	0	0	0	0	0	0	0.0247770069375619	0	0	0	0	0	0	0	0	0	0	0	0	0	0	0	0	0	0	0
589	0	0	0	0	0	0	0	0	0	0	0	0	0	0	0	0	0	0	0	0	0	0	0	0	0	0	0	0	0	0	0	0	0	0	0	0	0	0	0	0	0	0	0	0	0	0	0	0	0
590	0	0	0	0	0	0	0	0	0	-0.00244045294806716	0	0	0	0	0	0	0	0	0	0	-0.00244045294806716	0	0	0	0	0	0	0	0	0	0	0	0	0	0	0	0	0	0	0	0	0	0	0	0	0	0	0	0
591	0	0	-0.0164496947246462	0	0	-0.0128398821479511	0.001891545287222	0.00625899011844881	0	0	0	-0.00314435745055498	0	-0.0125774298022199	-0.00628871490110996	0	-0.385126873476772	-0.00943307235166494	0	0	0	0.0795398465161547	0	0	0.00556080742923873	0	0	-0.00314435745055498	0	0	0.0294925796530062	0	0	0	0.0111216148584775	0.41577802024691	-0.00387226492242621	0.0775888516636113	0.0333648445754324	0	-0.00628871490110996	0	0.00556080742923873	0	-0.0438180015273607	0	0.274133311058631	-0.000495179908801199	-0.00314435745055498
592	0	-0.0115101289134438	-0.00096742344696892	-0.0272571305035143	0	0.0109098843552258	0	-0.00230202578268877	0	-0.00230202578268877	0	0.00363662811840861	0.00266920467143969	0	0.0830773629342812	0.00363662811840861	0.0122444866909456	0.0175828960338251	0.0259576889368951	-0.00230202578268877	0	0.00727325623681722	0.0122444866909456	0.0105778662355755	0.00133460233571984	-0.0115101289134438	-0.76383757090923	-0.0180490273727592	0	0	0.00727325623681722	0	-0.136052586848104	-0.00230202578268877	-0.0069060773480663	-0.0161141804788214	0	0	0	0.00363662811840861	0	0	-0.0150126438125686	0	0	0.0135790890266656	0	0.090392309797318	-0.0029022703409068
593	0	0	0	0	0	0	0	0	0	0	0	0	0	0	0	0	0	0	0	0	0	0	0	0	0	0	0	0	0	0	0	0	0	0	0	0	0	0	0	0	0	0	0	0	0	0	-0.00281040975774268	0	0
594	0	0	0	0	0	0	0	0	0	0	0	0	0	0	0	-0.000470871866347729	0	0	0	0	0	0	0	0	0	-0.000470871866347729	0.000760878662679662	0	0	0	0	0	0.000760878662679662	0	0	0	0	0	-0.000470871866347729	0	0	0	0	0	0	0	0	0	0
595	0	0	0	0	0	0	0	0	0	0	0	0	0	0	0	0	0	0	0	0	0.00856979867204113	0	0	0	0	0	0.0129449838187702	0	0	0.00323624595469256	0	0.0070697162371705	0.00323624595469256	0	0.0160006581520457	0.00323624595469256	0	0	0	0.00323624595469256	0.0554328339361418	0.0574050785409149	0.0129449838187702	-0.00113893919203654	0	0	0.0253482527732893	0	0
596	0	0	-0.0360880548538434	0	0	0	-0.0721761097076868	-0.0360880548538434	0	0	0	0	0	0	0	0	0	0	0	0	0	0	0	-0.0360880548538434	0	0	0	0	0	0	0	0	0	0	0	0	0	0	0	0	0	0	0	0	0	0	-0.0360880548538434	0	0
597	0	0	0	0	0	0	0	0	0	0	0	0	0	0	0	0	0	0	0	0	0	0	0	0	0	0	0	0	0	0	0	0	0	0	0	0	0	0	0	0	0	0	0	0	0	0	0	0	0
598	0	0	0	0	0	0	0	0	0	0	0	0	0	0	0	0	0	0	0	0	0	0	0	0	0	0	0	0	0	0	0	0	0	0	0	0	0	0	0	0	0	0	0	0	0	0	0	0	0
599	0	0	0	0	0	0	0	0	0	0	0	0	0	0	0	0	0	0	0	0	0	0	0	0	0	0	0	0	0	0	0	0	0	0	0	0	0	0	0	0	0	0	0	0	0	0	0	0	0
600	0	0	0	0	0	0	0	0	0	0	0	0	0	0	0	0	0	0	0	0	0	0	0	0	0	0	0	0	0	0	0	0	0	0	0	0	0	0	0	0	0	0	0	0	0	0	0	0	0
601	0	0	-0.0023146540749485	0	0	0	0	-0.0023146540749485	0	0	0	0	0	0	0	0	0	0	0	0	0	0	0	0	0	0	0	0	0	0	0	0	0	0	0	0	0	0	0	0	0	0	0	0	0	0	0	0	0
602	-0.07174991753795	-0.070915238409475	0.055038841693282	-0.118484451614688	-0.335028706589469	-0.121593256512365	-0.053139571820103	0.15741698497555	-0.258313197948878	-0.599372086385691	-0.352012177718581	-0.383432598923159	0.105299520231935	0.231670939898929	0.161547896949716	0.010348521769519	0.530960885361649	-0.00951384264104272	0	0	-0.0285415279231282	-0.010953289281768	-0.399581390923794	-0.191298959897341	-0.216126915410543	-0.184893922153976	-0.303608285384891	-0.115605558333238	-0.074441382871389	0.0860419233336226	0.052534804307854	0.0072397168718416	0.00496559110264039	0.394011032308905	0.340871460488801	0.146463695693783	-0.3218012915385	0.25710366292438	-0.0022741257692012	-0.0190276852820854	0	0	-0.00951384264104272	0	-0.0285415279231282	-0.00413091197416399	0.060191860743934	0.074671294487617	-0.094721086846189
603	0	0	0	0	0	0	0	0	0	0	0	0	0	0	0	0	0	0	0	0	0	0	0	0	0	0	0	0	0	0	0	0	0	0	0	0	0	0	0	0	0	0	0	0	0	0	0	0	0
604	0	0	0	0	0	0	0	0	0	0	0	0	0	0	0	0	0	0	0	0	0	0	0	0	0	0	0	0	0	0	0	0	0	0	0	0	0	0	0	0	0	0	0	0	0	0	0	0	0
605	0	0	0	0	0	0	0	0	0	0	0	0	0	0	0	0	0	0	0	0	0	0	0	0	0	0	0	0	0	0	0	0	0	0	0	0	0	0	0	0	0	0	0	0	0	0	0	0	0
606	0.0228102189781022	0	0	0	0	0	0	0	0	0	0	0	0	0	0	0	0	0	0	0	0	0	0	0	0	0	0	0	0	0	0	0	0	0	0	0	0	0	0	0	0	0	0	0	0	0	0	0	0
607	-0.122111841343311	-0.0389206019719772	-0.0908147379346134	0.0205970325539391	-0.0286220856950076	-0.103788271925272	-0.0675426876669848	-0.057645725967804	-0.055372262831903	0.126658767615112	-0.0236736048454167	-0.0908147379346134	-0.0183235694180381	-0.0259470679813181	0.0232720502676286	-0.124786859057	-0.0183235694180381	-0.0107000708547577	-0.11716336049372	-0.066072333686661	-0.281272376100486	-0.060320743681493	0.00106879940253501	-0.01123748976338	-0.112214879644129	-1.11572392319668	0.42491418506944	-0.403402332687911	-0.51894739804107	1.23487694133523	-0.190859192743662	-0.195004564437674	-0.183235694180381	-0.109941416508229	-0.296519373227046	-0.222156296152358	-0.202628063000954	-0.013375088568448	-0.184304493582916	-0.0961647733619928	-0.054970708254115	-0.0831912393713338	0.012571979412871	0.0720896139387866	0.0698161508028857	0.144580782455362	-0.0518941359626362	-0.0545691536763257	0
608	0	0	0	0	0	0	0	0	0	0	0	0	0	0	0	0	0	0	0	0	0	0	0	0	0	0	0	0	0	0	0	0	0	0	0	0	0	0	0	0	0	0	0	0	0	0	0	0	0
609	0	-0.0138121546961326	-0.0276243093922652	-0.0138121546961326	-0.0276243093922652	0.0518764811698626	0	-0.0276243093922652	0	0	0.0218962119553317	0	-0.0276243093922652	0.0218962119553317	-0.0138121546961326	0	-0.0138121546961326	0	0	0	0.0218962119553317	0	0	-0.0828729281767956	0.0518764811698626	0	0	0	0	0	0.0437924239106635	0	0	-0.0138121546961326	0	0	0	0	0	0	0	-0.0138121546961326	0	0	0	0	0	0	0
610	0	0	0	0	0	0	0	0	0	-0.00181633246149375	0	0	0	-0.00181633246149375	0	0	0	0	0	0	0	0	0	0	0	0	0	0	0	0	0	0	0	0	0	-0.0134367700904754	-0.00181633246149375	0	0	-0.00181633246149375	0	0.0126140426251523	0	0	0	0.00420468087505079	0.00301050666827227	0	-0.00669331389391176
611	0	0	0	0	0	0	0	0	0	0	0	0	0	0	0	0	0	0	0	0	0	0	0	0	0	0	0	0	0	0	0	0	0	0	0	0	0	0	0	0	0	0	0	0	0	0	0	0	0
612	0.107489401456548	-0.300218340611354	-0.001680904220308	0.106648949346394	-0.109170305676856	-0.027292576419214	-0.084399085588104	0	-0.027292576419214	0.0810372771474878	-0.0545851528384279	-0.245633187772926	-0.218340611353712	-0.191888487044652	-0.13646288209607	-0.382096069868996	-0.0545851528384279	0.162074554294976	-0.163755458515284	0.268723503641369	0.371170192436991	-0.225064228234944	-0.0545851528384279	0.161234102184822	-0.0545851528384279	-0.0281330285293682	0.106648949346394	-0.0281330285293682	-0.245633187772926	0.133101073655453	0.377893809318225	-0.327510917030568	-0.0827181813677962	-0.354803493449782	0.021409411648135	-0.110851209897164	-0.219181063463866	0.045340179626733	-0.111691662007318	-0.13646288209607	0.050382892287657	0.133101073655453	0.0537447007282738	-0.13646288209607	0.07935637292718	0.0801968250373341	-0.0554256049485822	-0.0545851528384279	-0.27292576419214
613	-0.0290951411114344	0	0	0.113122171945701	0	0	0	0	0.0565610859728507	0	-0.0872854233343032	-0.0581902822228688	-0.0290951411114344	0	0	0	0	0	0	-0.0581902822228688	0	0	0	0	0	-0.0290951411114344	0	0	0.0565610859728507	0	0	-0.0290951411114344	0	0	0	0	0.0565610859728507	0	0	-0.0290951411114344	0	0	0.0565610859728507	0	0	0	-0.0290951411114344	0	0
614	0	0	0	0	0	0	0	0	0	0	0	0	0	0	0	0	0	0	0	0	0	0	0	0	0	0	0	0	0	0	0	0	0	0	0	0	0	0	0	0	0	0	0	-0.0186752665102421	0	0	0	0	0
615	0	0	0	0	0	0	0	0	0	0	0.0116740602381508	0	0	0.135010241380453	0	0	0.0466962409526033	0	0	0	0	-0.00575274693666226	0	0.0116740602381508	0	0	0	0	0	0	0	0	0	0.0118426266029772	0	0	0	0	0	0	0	0	0	0	0	0	-0.00575274693666226	0	0
616	0	0	0	0	0	0	0	0	0	0	0	0	0	0	0	0	0	0	0	0	0	0	0	0	0	0	0	0	0	0	0	0	0	0	0	0	0	0	0	0	0	0	0	0	0	0	0	0	0
617	0	0	0	0	0	0	0	0	0	0	0	0	0	0	0	0	0	0	0	0	0	0	0	0	0	0	0	0	0	0	0	0	0	0	0	0	0	0	-0.109529025191676	0	0	0	0	0	0	0	0	0	0
618	0	0	0	0	0	0	0	0	0	0	0	0	0	0	0	0	0	0	0	-0.000224082605811806	0	0	0	0	0	0	0	0	0	0	0	0	0	0	0	0	0	0	0	0	0	0	0	0	0	0	0	0	0
619	0	0	0	0	0	0	0	0	0	0	0	0	0	0	0	0	0	0	0	0	0	0	0	0	0	0	0	0	0	0	0	0	0	0	0	0	0	0	0	0	0	0	0	0	0	0	0	0	0
620	0	0	0	0	0	0	0	0	0	-0.0568343279340722	-0.0284171639670361	-0.243587224085945	0.0649189188191748	-0.0324998246993128	0	-0.077166901016006	0.0811688311688312	-0.14208581983518	-0.170502983802217	-0.255754475703325	0	-0.0730842402837284	0	0	-0.0284171639670361	0	0.121753246753247	0	-0.0284171639670361	0	0	-0.0284171639670361	0	0	0.0405844155844156	-0.0284171639670361	0	0.0121672516173795	0.202922077922078	-0.0284171639670361	0	0	0.0405844155844156	-0.0852514919011083	0	0	0.162337662337662	0	0.0405844155844156
621	0	0	0	0	0	0	0	0	0	0	0	0	0	0	0	0	0	0	0	0	0	0	0	0	0	0	0	0	0	0	0	0	0	0	0	0	0	0	0	0	0	0	0	0	0	0	0	0	0
622	0	0	0	0	0	0	0	0	0	0	0	0	0	0	0	0	0	0	0	0	0	0	0	0	0	0	0	0	0	0	0	0	0	0	0	0	0	0	0	0	0	0	0	0	0	0	0	0	0
623	0	0	0	0	0	0	0	0	0	0	0	0	0	0	0	0	0	0	0	0	-0.00809978940547546	0	0	-0.00809978940547546	0	0	0	0	0	0	0	-0.0161995788109509	0	0	0	0	0	-0.0323991576219018	0	0	0	0.058055152394775	0	0	-0.0161995788109509	0	0	0	0
624	0	0	0	0	0	0	0	0	0	0	0	0	0	0	0	0	0	0	0	0	0	0	0	0	0	0	0	0	0	0	0	0	0	0	0	0	0	0	0	0	0	0	0	0	0	0	0	0	0
625	0.0159515074174509	0	0	0.0478545222523529	0	0	0	0	-0.0101739749720216	0	-0.0101739749720216	0	0	0	0	0	0	0	0	0	0	0	0	0	0	0	-0.00508698748601078	0	0	0	0	0	0	0	0	0	0	0	0	0	0	0	0	0	0	0	0.0159515074174509	0	0
626	0	0	0	0	0	0	0	0	0	0	-0.0149186931224825	0	-0.00994579541498831	0	0.0284333238555587	0	-0.00497289770749416	0	-0.00994579541498831	-0.00497289770749416	0	0	0	0	0	0	0	0	0	0	0	0	0	0	0	0	0	0	0	0	0	0	0	0	0	0	0	0	0
627	0	0	0	0	0	0	0	0	0	0	0	0	0	0	0	0	0	0	0	0	0	0	0	0	0	0	0	0	0	0	0	0	0	0	0	0	0	0	0	0	0	0	0	0	0	0	0	0	0
628	0	0	0	0	0	0	0	0	0	0	0	0	0	0	0	0	0	0	0	0	0	0	0	0	0	0	0	0	0	0	0	0	0	0	0	0	0	0	0	0	0	0	0	0	0	0	0	0	0
629	0	-0.0188982330152131	0	0	0	0	0	0	0	0	0	0	0	0	0	0	0	0	0	0	0	0	0	0	0	0	0	0	0	0	0	0	0	0	0	0	0	0.0152951973080453	-0.00944911650760654	0.0152951973080453	0	0	0	0	0	-0.0283473495228196	0	0	0
630	0	0	0	0	0	0	0	0	0	0	0	0	0	0	0	0	0	0	0	0	0	0	0	0	0	0	0	0	0	0	0	0	0	0	0	0	0	0	0	0	0	0	0	0	0	0	0	0	0
631	-0.00305029943772814	-0.00915089831318441	0	-0.00203353295848542	-0.00101676647924271	-0.00203353295848542	0	0	0	0.00045833382757815	0	0	0	-0.00101676647924271	0	0	0	-0.0102677636165136	0	-0.00305029943772814	0	0	0	0.00091666765515631	0	0	0	-0.00101676647924271	0	-0.00101676647924271	0	0	-0.00101676647924271	-0.00203353295848542	-0.00111686530332912	0	0	0.00147510030682086	0	0.00147510030682086	0	-0.00101676647924271	0	0	0	0	0	0	-0.00305029943772814
632	0	0	0	0	0	0	0	0	0	0	0	0	0	0	0.0196078431372549	0	0	0	0	0	0	0	0	0	0	0	0	0	-0.0508130081300813	0	0	0	0	0	0	0	0	0	0	0	0	0	0	0	0	0	0	0	0
633	-0.0186462800671266	-0.0320596594109024	-0.0186462800671266	-0.0361498987211149	-0.0279694201006899	-0.0093231400335633	-0.0175036186539883	0	-0.0040902393102125	-0.0466157001678165	0.0436681222707424	0	-0.0227365193773391	0.0250218422036158	-0.0093231400335633	0.0145560407569141	-0.0093231400335633	-0.0413827994444657	0.0436681222707424	0	0.0052329007233508	0	-0.0186462800671266	-0.0652619802349431	0.0302547429269666	-0.0093231400335633	-0.093231400335633	0.0291120815138282	0	-0.0040902393102125	-0.0093231400335633	-0.0279694201006899	0	-0.0093231400335633	0	0.0197889414802649	0	0	0.0250218422036158	-0.0466157001678165	-0.0186462800671266	0	-0.0186462800671266	0	0.054133923717444	0	0	0	0
634	0	0	0	0	0	0	0	0	0	0	0	0	0	0	0	0	0	-0.00101166449158801	0	0	0	0	0	0	0	0	0	0	0	0	0	0	0	0	0	-0.00505832245794005	0	0	0	0	0	0	0.00200267902857992	0	0	0	-0.0020749538696662	-0.00303499347476403	0.00201300400587797
635	0	0	0	0	0	0	0	0	0	0	0	0	0	0	0	0	0	0	0	0	0	0	0	0	0	0	0	0	0	0	0	0	0	0	0	0	0	0	0	0	0	0	0	0	0	0	0	0	0
636	0	0	0	0	0	0	0	0	0	0	0	0	0	0	0	0	0	0	0	0	0	0	0	0	0	0	0	0	0	0	0	0	0	0	0	0	0	0	0	0	0	0	0	0	0	0	0	0	0
637	0	0	0	0	0	0	0	0	0	0	0	0	0	0	0	0.0111919418019026	0	0	0	0	0	0	0	0	0	0	0	-0.00265005962634159	0	0	0	0	0	0	0	0	0	0	0	0	0	0	0	0	0	0	0	0	0
638	0	0	0	0	0	0	0	0	0	0	0	0	0	0	0	0	0	0	0	0	0	0	0	0	0	0	0	0	0	0	0	0	0	0	0	0	0	0	0	0	0	0	0	0	0	0	0	0	0
639	0	0	0	0	0	0	0.059313900978627	0	-0.00477304185957711	0.00765110941086458	0	0	0	-0.00954608371915422	0	-0.0190921674383084	0.0334825051947458	-0.0113698458497378	0	0	0	-0.00954608371915422	0	0	0	0.00765110941086458	0	0	0	0	0	0	0	0	0	0	0.0258313957838812	0.106203650686813	0.320577138546433	-0.00954608371915422	0	0	0.0421167078486082	0	0	0	-0.106759470863574	0	0
640	-0.00982994200334218	-0.0196598840066844	-0.00982994200334218	-0.0196598840066844	-0.0161208420528072	0	-0.00982994200334218	0	0.0267379679144385	0	0	-0.00982994200334218	-0.0161208420528072	0	0	0	0	0	0	-0.0196598840066844	0	0.0169080259110963	0	0	0	-0.0196598840066844	0	0	0	0	0.00353904195387712	0	0.0133689839572193	0	-0.0196598840066844	0	0.0401069518716578	0	0	0	0	0	0	0	0	0	0	0	0
641	0	0	0	0	0	0	0	0	0	0	0	0	0	0	0	0	0	0	0	0	0	0	0	0	0	0	0	0	0	0	0	0	0	0	0	0	0	0	0	0	0	0	0	0	0	0	0	0	0
642	0.0521829883457993	0	0	0.0347886588971995	0.0173943294485998	0	0	-0.00888967908258512	0	0	-0.0266690372477554	0	0	-0.00888967908258512	0	0	0	0	0	0.0258989798146144	0	0	0	0	0	0	0	0	0	0	0	0	0	0.00850465036601468	0	0	0.0173943294485998	0	0	0	0	-0.0177793581651702	-0.0444483954129256	0	0	-0.0177793581651702	-0.00888967908258512	0	0
643	0	0	0	0	0	0	0	0	0	0	0	0	0	0	0	0.0112044817927171	0	0	0	0	0	0	0	0	0	0	0	0	0	0	0	0	0	0	-0.00602954476936991	0	0	0	0	0	0	0	0	0	0	0	0	-0.00602954476936991	0
644	0	0	0	0	0	0	0	0	0	0	0	0	0	0	0	0	0	0	0	0	0	0	0	0	0	0	0	0	0	0	0	0	0	0	0	0	0	0	0	0	0	0	0	0	0	0	0	0	0
645	0	0	0	0	0	0	0	0	0	0	0	0	0	0	0	0	0	0	0	0	0	0	0	0	0	0	0	0	0	0	0	0	0	0	0	0	0	0	0	0	0	0	0	0	0	0	0	0	0
646	0	0	0	0	0	0	0	0.00541535795516084	0	0	0	0	0	-0.00435938794193295	0	0	0	0	0	0	0	0	0	0	0	0	0.00105597001322789	0	0.00541535795516084	0	0	0	0.00105597001322789	0	0	0.00541535795516084	0	0	0	0	0.00541535795516084	0	0	0	0	0	0	0	0
647	0	0	0	0	0	0	0	0	0	0	0	0	0	0	0	0	0	0	0	0	0	0	0	0	0	0	0	0	0	0	0	0	0	0	0	0	0	0	0	0	0	0	0	0	0	0	0	0	0
648	0	0	0.00354710556186152	0	0	0.00180284852814503	0	0	0	0	0	0	0	0	0	0	0	0	0	-0.00174425703371649	0	0	0	0	0	0	0	0	0	0	0	0	0	0	0	0	0	0	0	0	0	0	0	0	0	0	0	0	0
649	0	0	0	0	0	0	0	0	0	0	0	0	0	0	0	0	0	0	0	0	0	-0.0149009089554463	-0.00745045447772314	0	0	0.0114982177762447	0	0	0	0	0	0	0	0	0	0	0	0	0	0	0	0	0	0	0.0114982177762447	0	0	0	0
650	0	0	0	0	0	0	0	0	0	0	0	0	0	0	0	0	0	0	0	0	0	0	0	0	0	0	0	0	0	0	0	0	0	0	0	0	0	0	0	0	0	0	0	0	0	0	0	0	0
651	0	-0.00717154331612163	0	0	0	0	0	0.0029894681672525	0	0	-0.00717154331612163	0.031675641431739	-0.0143430866322433	0.0158378207158695	0	-0.00717154331612163	0	0.00866627739974787	-0.0143430866322433	0	0.0158378207158695	0	0.0561797395473564	-0.0502008032128514	0.031675641431739	0	-0.0143430866322433	0	0.0158378207158695	0.0331703755153652	0	0	0	-0.00717154331612163	0	0.0014947340836262	0	-0.0143430866322433	-0.0215146299483649	0.0158378207158695	0	0	0	-0.0143430866322433	0	-0.00717154331612163	0.0173325547994957	-0.00717154331612163	0
652	-0.205379492978438	-0.483729111697449	-0.278542917065345	-0.45454106140122	-0.0879507475813544	-0.0439753737906772	-0.0879507475813544	0	-0.249354866769115	-1.12905564092899	-0.131926121372032	-0.263852242744063	0.0292846994693961	-0.483729111697449	-1.89094107299912	0	-2.40424483168546	-0.982148897716177	-0.263852242744063	0	-1.49525935805619	-0.0879507475813544	0	0	-0.131926121372032	0	0	0.0732600732600733	0.146520146520147	-0.0439753737906772	0.0732600732600733	-0.395778364116095	0	0	-0.0439753737906772	0	0	0	0	0.043878724617511	0	0	-9.66491731660135e-05	0	0.293040293040293	-0.0439753737906772	0	0.146520146520147	0
653	0	0	0	0	0	0	0	0	0	0	0	0	0	0	0	0	0	0	-0.00135924045643295	0	0	0	0	0	0	0	0	0	0	0	0	0	0	0	0	-0.000679620228216473	0	0	0	0	0	0.00154137830047629	0	0	0	0	0	0	0
654	0.17661264934835	0.02324331518966	0.046479321160707	-0.038719367399799	0.009304635294477	-0.079621754758709	0.010849316828045	-0.010530147615274	-0.06661134562739	0.247568107238127	0.10163224840896	-0.094496014636369	0.063521982560254	0.100392117650937	0.054536516478548	-0.045231881184071	-0.0077453353236823	-0.022924145976888	-0.059482421073412	0.057328637988753	-0.317885226702359	-0.152730995733146	0.0681779548167981	0.019849401346977	-0.02353324752798	-0.166365124852784	-0.230808068958287	0.274539123920469	-0.259628317949742	-0.122061514432576	0.173835146275372	-0.012372070705775	0.288477803815651	0.11527368674721	-0.099130059237075	0.067249684052935	-0.098201788473211	-0.126710177470508	0.302111932935293	-0.384808432323908	-0.044296301201595	-0.0222931167699569	0.059192488735094	0.042454378111093	-0.267692822486197	0.013025027568545	0.088621839277641	0.111545985254528	0.247560798019514
655	0	0	0	0	0	0	0	0	0	0	0	0	0	0	0	0	0	0	0	0	0	0	0	0	0	0	0	0	0	0	0	0	0	0	0	0	0	0	0	0	0	0	0	0	0	0.00725058004640371	0	0	0
656	0	0	0	0	0	0	0	0	0	0	0	0	0	0	0	0	0	-0.00087038262019984	0	0	0	0	0	0	0	0	0	0	0	0	0	0	0	0	0	0	0	0	0	0	0	0	0	0	0	0	0	0	0
657	0	0	0	0	0	0	0	0	0	0	0	0	0	0	0	0	0	0	0	0	0	0	0	0	0	0	0	0	0	0	0	0	0	0	0	0	0	0	0	0	0	0	0	0	0	0	0	0	0
658	0	0	0	0	0	0	0	0	0	0	0	0	0	0	0	0	0	0	0	0	0	0	0	0	0	0	0	0	0	0	0	0	0	0	0	0	0	0	0.0826446280991736	0	0	-0.0115673799884326	0	0	0	0	0	0	0
659	0	0	0	0	0	0	0	0	0	0	0	0	0	0	0	0	0	0	0	0	0	0	0	0	0	0	0	0	0	-0.0286615075952995	0	0	0	0	0	0	0	0	0	0	0	0	0	0	0	0	0	0	0
660	0	0	0	0	0	0	0	0	-0.038563691793366	0	0	3.06952963514541	-0.0642260757867694	2.14484242174375	-0.192678227360308	-0.0642260757867694	0	0	0	0.526569682487596	0.436681222707424	3.33919501448593	0	0	0	0	1.04023805717523	0.899024829408252	-0.102789767580135	3.90432838876689	0.14121322776698	0.244002995347116	-0.0642260757867694	0	-0.56597476392009	0.462343606700827	0	0.025662383993404	0.436681222707424	0	0	-0.192678227360308	0	-1.45167759070882	0	-0.26980561094704	-0.0642260757867694	0	-0.321130378933847
661	0	0	0	0	0	0	0	0	0	0	0	0	0	0	0	0	0	0	0	0	0	0	0	0	0	0	0	0	0	0	0	0	0	0	0	0	0	0	0	0	0	0	0	0	0	0	0	0	0
662	0.0212323551806947	0	0	0	0	-0.018450184501845	0	0	0	0	0	-0.018450184501845	0	0	-0.03690036900369	0	0	0	-0.0553505535055351	0.082147250043929	0.0396825396825397	-0.0922509225092251	-0.0156680138229954	0	0	-0.03690036900369	0	-0.0156680138229954	-0.018450184501845	0	0	0.0212323551806947	0	0.0396825396825397	0	-0.018450184501845	-0.0553505535055351	0.082147250043929	0.0793650793650794	-0.0156680138229954	-0.03690036900369	-0.018450184501845	0	0	-0.03690036900369	-0.0738007380073801	0	-0.018450184501845	0
663	0	0.00260793594909309	0	-0.00202190736631401	0	0	0	0	0	0	0	0	-0.000505476841578503	0	0	0	0	0	0	0	0	0	0	0	0	-0.00151643052473551	0	0	0	0	0	0	0	0	0	0	0	0	0	0	0	0	-0.000505476841578503	0	0	0	0	0	0
664	0	0	-0.0172361787391735	0	0	0	0	0	0	0	0	0	0	0	0	0	0	0	0	0	0	0	0	0	0	0	0	0	0	0	0	0	0	0	0	0	0	0	0	0	0	0	0	0	0	0	0	0	0
665	-0.265392781316348	-0.318471337579618	-0.106157112526539	0.213447171824973	-0.0530785562632696	-0.212314225053079	0.000566473385947994	-0.0530785562632696	0	0	-0.0530785562632696	0	0	-0.0530785562632696	0	-0.211747751667131	0	0	0	0	-0.0530785562632696	0	0	0.160368615561703	0	0	0	-0.211181278281184	-0.106157112526539	0	-0.0530785562632696	-0.530219089246749	0	-0.212314225053079	0	-0.211747751667131	-0.106157112526539	0.054211503035164	-0.265392781316348	-0.0530785562632696	0	0	0.106723585912487	-0.106157112526539	-0.0530785562632696	0	0.160368615561703	0	-0.052512082877322
666	-0.033311125916056	0	0	0	0	-0.016655562958028	-0.0666222518321119	0.0632911392405063	-0.016655562958028	0	0	0	0.0149900066622252	0	-0.033311125916056	0.0466355762824783	-0.033311125916056	0.221518987341772	-0.033311125916056	0	0.0949367088607595	-0.0499666888740839	0	0.0299800133244503	0	-0.0016655562958028	0.0632911392405063	0	0	-0.016655562958028	0.0316455696202532	0	0	0	0	0	0	-0.016655562958028	-0.033311125916056	0	0	-0.016655562958028	0	0.0616255829447035	0	0	0	-0.033311125916056	0
667	0	0	0	0	0	0	0	0	0	0	0	0	0	0	0	0	0	0	0	0	0	0	0	0	0	0	0	0	0	-0.00254013411908149	0	0	0	0	0	0	0	0	0	0	0	0	0	0	0	0	0	0	0
668	0	0	0	0	0	0	0	0	0	0	0	0	0	0	0	0	0	0	0	0	0	0	0	0	0	0	0	0	0	0	0	0	0	0	0	0	0	0	0	0	0	0	0	0	0	0	0	0	0
669	0	0	-0.0125502008032129	0	0	0	0	0	0	0	0	0	0	0	0	0	0	0	0	0	0	0	0	0	0	0	0	0	0	0	0	0	0	0	0	0	0	0	0	0	0	0.0121980970968529	0	0	0	0	0	0	0
670	0	0	0	0	0	0	-0.00292252389163281	0	0	0	0	0	0	0	0	0	0	0	0	0	0	0	0	0	0	0	0	0	0	0	0	0	0	0	0	0	0	0	0	0	0	0	0	0	0	0	0	0	0
671	0	-0.00692185228767218	0	0	0	0	0	0	0	0	0.00870775142759887	0	0	0.00320023366585405	0	0	-0.00692185228767218	0	0	0	0.00550751776174478	0	0	0.00870775142759887	0	0	-0.00230728409589073	0	-0.00461456819178145	-0.00230728409589073	0.0110150355234896	-0.0198726072930532	0	-0.00230728409589073	0	0	0	0	-0.00692185228767218	0	0	0	0	0	0	0	0	0	0
672	0	0	0	-0.0158579130986362	0	0	0	0	0	0	0	0	0	0	0	0	0	0	0	0	0	-0.0158579130986362	0	0	0	0	0	0	0	0	0	0	0	0	0	0	0	0	0	-0.0317158261972724	0	0	-0.0158579130986362	0	0	0	0	0	0
673	0	0	0	0	0	0	0	0	0	0	0	0	0	0	0	0	0	0	0	0	0	0	0	0	0	0	0	0	0	0	0	0	0	0	0	0	0	0	0	0	0	0	0	0	0	0	0	0	0
674	0	0	0.033649895397832	0	0	0	0	0	0.00799726408309677	0	0	0	0	0	0.0176553672316384	0	-0.00965810314854163	0	0	0	0	-0.0193162062970833	0.0256526313147352	-0.0193162062970833	0.00799726408309677	0	-0.00965810314854163	0	0	0	-0.0016608390654449	0	0	0	0	0	0	0	0	0	0	0	-0.0193162062970833	0	0	0	0	0	0
675	0	0	0	0	0	0	0	0	0	0	0	0	0	0	0	0	0	0	0	0	0	0	0	0	0	0	0	0	0	0	0	0	0	0	0	0	0	0	0	0	0	0	0	0	0	0	0	0	0
676	0	0	0.000243180016438969	0	0	0	0.00243180016438969	0.000243180016438969	0	0	0	0	0	0	0	0	0	0	0	0	0	0.000486360032877938	-0.000208692893798273	0	0	-0.000417385787596547	0	0	-0.000104346446899137	-0.000417385787596547	-0.000104346446899137	0	0	-0.000521732234495683	-0.000104346446899137	0	0	0	0	-0.000104346446899137	0	-0.000104346446899137	0	0	0	0	0	0	0
677	0.006379178361827	-0.00483769532194862	0.006379178361827	-0.00483769532194862	0	0	-0.0145130859658459	0.012758356723654	0	0.00154148303987838	0	-0.00967539064389725	0	0.025516713447308	0	0	0	-0.00483769532194862	0	0	0	0	0	0	0	0	0	0	-0.00483769532194862	0	0	0	0	0	-0.00483769532194862	0	0	0	0	0	0	0	0	0	0	0	0	0	0
678	0	0	0	0	0	0	0	0	0	0	0	0	0	0	0	0	0	0	0	0	0	0	0	0	0	0	0	0.0123016361176036	0	0	0	0	0	0	0	0	0	0	0	0	0	0	0	0	0	0	0	0	0
679	0	0	0	0	0	0	0	0	0	0	0	0	0	0	0	0	0	0	0	0	0	0	0	0	-0.00699349604867473	0	0	-0.0139869920973495	0	0	0	0.0198161554258561	0	0.0134048257372654	-0.0209804881460242	0	0	-0.0139869920973495	0.0134048257372654	0	0	0	-0.00699349604867473	0	0	0	-0.00699349604867473	-0.0279739841946989	0.0040826642482545
680	0	0	0	-0.00086617583369424	0	0	0	0	0.00719251977942939	0	0	0	0	0	-0.00173235166738848	0	0	-0.00086617583369424	0	0	0	0	-0.00020102090793959	0	0	0	0	0	-0.00259852750108272	0	0	0	0	0	0	0	0.00239750659314313	0	0	0	0	0	0	0	0	0	0	0	-0.00086617583369424
681	0	0	0	0	0	0	0	-0.0244021473889702	0	0	-0.0244021473889702	0	0	0	0	0	-0.0488042947779405	0	0	0	0	0	0	0	0	0	0	0	0	0	0	0	0	0	0	0.0674763832658569	0	0	0	0	0	0	-0.0244021473889702	0	0	0	0	-0.0244021473889702	0
682	0.0103220478943022	0	0	0	0	0	0	0	0	0	0	0	0	0	0	0	0	0	0	0	0	0	0	0	0	0	0	0	0	0	0	0	0	0	0	0	0	0	0	0	0	0	0	0	0	0	0	0	0
683	0	0	0	0	0	0	0	0	0	0	0	0	0	0	0	0	0	0	0	0	-0.0499750124937531	0	0	0	0	0	0	0	0	0	0	0	0	0	0	0	0	0	0	0	0	0	0	0	0	0	0	0	0
684	0	0	0	0	0	0	0	0	0	0	0	0	0	0	0	0	0	0	0	0	0	0	0	0	0	0	0	0	0	0	0	0	0	0	0	0	0	0	0	0	0	0	0	0	0	0	0	0	0
685	-0.00597514340344168	-0.0149378585086042	-0.00896271510516252	0.00681431005110733	0	0	0	-0.00298757170172084	-0.0119502868068834	0	-0.00298757170172084	0	0	0.0545144804088586	0	-0.0119502868068834	0	-0.00896271510516252	0.00382673834938649	-0.00597514340344168	0	-0.0149378585086042	-0.00298757170172084	0	0	0	0	0	0	-0.00298757170172084	0	0.00765347669877302	0.000268118019159602	-0.0069152869208896	-0.0274591939439936	-0.02672100416611	-0.0091646688447264	-0.191204588910134	0.02947180953808	-0.0334343373474357	0.0165152149341533	-0.0419269806938739	-0.065089364529757	0.015272140807359	-0.112319463128784	-0.000672025498288001	0.00483304614643001	0.037226263106634	-0.0616317210693121
686	0	-0.000805743338516949	0	0	0	0	0	0	0	0	0	0	0.000230080633557241	0	0	0	-0.000268581112838983	0	0	0	0	0	0	0	0	0	0	0	-0.000268581112838983	0	0	0.00024933087319811	0	0	0	0	-0.000537162225677966	0	0	0	0	0	0	0	-0.000537162225677966	0	0	-0.000556412465318837	0
687	0	0	0.0153096626194832	0	0	0	0	0	0	0	0	0	0	0	0	0	0	0	0	0	0	0	0	0	0	0	0	0	0	0	0	0	0	0	0	0	0	0	0	0	0	0	0	0	0	0	0	0	0
688	0	0	0	0	0	0	0	0	0	0	0	0	0	0	0	0	0	0	0	0	0	0	0	0	0	0	0	0	0	0	0	0	0	0	0	0	0	0	0	0	0	0	0	0	0	0	0	0	0
689	-0.0743731406714832	-0.0422567438378509	-0.0424989375265618	-0.109627459484477	-0.031147622078788	-0.0526392845307803	-0.0849978750531237	-0.0212494687632809	0.0038645030454948	0.0108669280703514	0.0854822624305457	0.0712352186921214	0.0323585905223434	-0.038634434481067	-0.0424989375265618	-0.0176271594064971	-0.0246295844313537	0	0.0072446187135677	-0.0495013625514185	0	-0.0424989375265618	0	-0.0637484062898428	-0.0070024250248566	0.0284940874768486	-0.0424989375265618	0	-0.0106247343816405	0.0142470437384243	0.0072446187135677	0.0142470437384243	-0.0106247343816405	0	-0.0106247343816405	0	0.0142470437384243	-0.0424989375265618	0.0427411312152728	0	-0.0106247343816405	0	0	0	-0.0212494687632809	-0.0106247343816405	0.0142470437384243	-0.0531236719082023	-0.0106247343816405
690	0	0	0	0	0	0	0	0	0.0130463144161774	0	0	0	0	0.0521852576647097	0	0.047671060258346	-0.000107886478895008	0.091324200913242	0.012916850641505	0.0217294724964432	-0.0174310480478679	0.00434157904013283	-0.0174094707520891	0	-0.00870473537604457	-0.0261357834239125	-0.0174094707520891	0	0	0	0.00434157904013283	0	0	0	0	0	0	0	0	0	0	0	0	0	0	0	0	0	0
691	0	0	0.0179985601151908	-0.0117178345441762	0.00899928005759539	0	0	0	-0.0175767518162644	-0.0117178345441762	0	0.00899928005759539	0	-0.0117178345441762	0.0179985601151908	0	0	-0.00585891727208812	0	0	-0.00585891727208812	0	0	0	-0.00585891727208812	0	0.0179985601151908	0	0	0	0	-0.00585891727208812	0	0	0.0179985601151908	0	0	0	0	0	0	0.00899928005759539	0	0	0	0	0	0	0.00899928005759539
692	0	0	0	0	0	0	0	0	0	0	0	0	0	0	0	0	0	0	0	0	0	0	0	0	0	0	0	0	0	0	0	0	0	0	0	0	0	0	0	0	0	0	0	0	0	0	0	0	0
693	0	0	0	0	0	0	0	0	0	0	0	0	0	0	0	0	-0.00730994152046784	0	0	-0.0146198830409357	0	0	0	-0.00730994152046784	0	0	0	0	0	0	0	-0.0026522730024815	0	0	-0.00730994152046784	0.0103018440300814	0.0206036880601628	0	0	0	0	0	0	0	0	0	0	-0.00730994152046784	0
694	0	0	0	0	0	0	0	0	0	0	0	0	0	0	0	0	0	0	0	0	0	0	0	0	0	0	0	0	0	0	0	0	0	0	0	0	0	0	0	0	0	0	0	0	0	0	0	0	0
695	0.213447171824973	-0.0534188034188034	-0.213675213675214	-0.000114020925120001	-0.0534188034188034	0	0	-0.0534188034188034	0	0	-0.0534188034188034	0	-0.213789234600334	0	0	0	0	-0.0534188034188034	0	0	0.16002836840617	0	0	0	-0.213903255525454	-0.106837606837607	0	-0.0534188034188034	-0.534302055113154	0	-0.213675213675214	0	-0.213789234600334	-0.106837606837607	0.053190761568563	-0.267094017094017	-0.0534188034188034	0	0	0.106723585912487	-0.106837606837607	-0.0534188034188034	0	0.16002836840617	0	-0.053532824343923	0	0.106723585912487	0
696	0	0	0	0	0	0	0	0	0	0	0	0	0	0	0	0	0	0	0	0	0	0	0	0	0	0	0.00539930826421552	0	0	0	0	0	0	0	0	0	0	0	0	0	0	0	0	0	0	0	0	0	0
697	0.00188968045503505	-0.000962862397334797	0	0	0	0	0	0	0	0	0	0	0	0	0	0	0	0	0	0	0	0	0	0	0	0	0	0	0	0	0	0	0	0	0	0	0	0	0	0	0	0	0	0	0	0	0	0	0
698	0	0	0.0188824649647184	0.0253147307262495	-0.00601793344165613	0	0	0	0	0	0	0	0	0	0	0	0	0	0	0	0	0	0	0	0	0	0	0	0	0	0	0	0	0	0	0	0.0249003984063745	0	0	0	0	0	0	0	0	0	0	0	0
699	0	0	0	0	0	0	0	0	0	0	0	0	0	0	0.00423029738990651	0	0	0	0	-0.00294637595757219	0	0.00128392143233432	0	-0.00294637595757219	0	0	0	0	0	0	0	0	0	0	0	0	-0.00589275191514437	0	0	0	0	0	0	0	0	0	0	0	0
700	0	0	0	0	0	0	0	0	0	0	0	0	0	0	0	0	0	0	0	0	0	0	0	0	0	0	0	0	0	0	0.069856793573175	0	0	0	0	0	0	0	0	0	0	0	0	0	0	0	0	0	0
701	-0.00015582707557769	0	0	0	0	0	0	0	0	-0.000790744978071556	0	0	0	0	0	0	0	-0.00015582707557769	0	0	0	-0.00015582707557769	0	-0.00062085716571211	-0.00015582707557769	0	-0.00077913537788845	0	0	0	0	0	0	0	0	0.000683807439824945	0	0	0	0	0	0	0	0	0	0	0	0	0
702	0	0	0	0	0	0	0	0	0	0	0	0	0	0	0	0	0	0	0	0	0	0	0	0	0	0	0	0	0	0	0	0	0	0	0	0	0	0	0	0	0	0	0	0	-0.325172263669631	0	0	0.0211909228716848	0
703	0	0	0	0	0	0	0	0	0	0	0	0	0	0	0	0	0	0	0	0	0	0	0	0	0	0	0	0	0	0	0	0	0	0	0	0	0	0	0	0	0	0	0	0	0	0	0	0	0
704	0	0	0	0	0	0	0	0	0	0	0	0	-0.0154475940372287	0	0	0	0	0	0	0	0	0	0	0	0	0	0	0	0	0	0	0	0	0	0	0	0	0	0	0	0	0	0	0	0	0	0	0	0
705	0	0	0	0	0	0	0	0	0	0	0	0.00144123369604381	0	0	0	0	0	0	0	0	0	0	0	0	0	0	0	0	0	0	0	0	0	0	0	0	0	0	0	0	-0.00072668609340823	0	0	0	0	0	0	0	0
706	0	0	0	-0.0128998968008256	0	0	0	0	0	0	0	0	0.0169319336268202	0	0	0	0	0	0	0	0	0.0169319336268202	0	0	0	0	0	-0.0128998968008256	0	0	0	0	0	0	-0.0128998968008256	0	0	-0.0257997936016512	0	0	0	0	0	0	0	0.0080640736519892	-0.0128998968008256	0	0
707	0	0	0	0	0	0	0	0	0	0	0	-0.000966669244451319	0	0	0	0	0	0	0	0	0	0	0	0	0	0	0	0	0	0	0	0.000378845482207361	0.00269102945331737	0	0	0	0	0	0	0	0	0	0	0	0	-0.000966669244451319	0	0	0
708	0	0	0	0	0	0	0	0	0	0	0	0	0	0	0	0	0	0	0	0	0	0	0	0	0	0	0	0	0	0	0	0	0	0	0	0	0	0	0	0	0	0	0	0	0	0	0	0	0
709	0	0	0	0	0	0	0	0	0	0	0	0	0	0	0	0	0	0	0	0	0	0	0	0	0	0	-0.0216262975778547	0	0	0	0	0.043010752688172	0	0	0	0.043010752688172	0	0	-0.0432525951557093	0	0	0	0	0	0	0	0	0	0
710	0	0	0	0	0	0	0	0	0	0	0	0	0	0	0	0	0	0	0	0	0	0	0	0	0	0	0	0	0	0	0	0	0	0	0	0	0	0	0	0	0	0	0	0	0	0	0	0	0
711	0	0	0	0	0	0	0	0	0	0	0	0	0	0	0	0	0	0	0	0	0	0	0	0	0	0	0	0	0	0	0	0	0	0	0	0	0	0	0	0	0	0	0	0	0	0	0	0	0
712	-0.00354710556186152	0	0	0	0	0	0	0	0	0	0	0	0	0	0	0	0	0	0	0	0	0	0	0	0	0	0	0	0	0	0	0	0	0	0	0	0	0	0	0	0	0	0	0	0	0	0	0	0
713	0	0	0	0	0	0	0	0	0	0.198906016907011	0	0	0	0	0	0	0	0	0	0	0.0497265042267529	0	0	0	0	0	0	0.248632521133764	0	0	0	-0.0336247478143914	0	0	0	0	0	0	-0.0336247478143914	0	0.0497265042267529	-0.0014212349896683	-0.0336247478143914	0	0	0	0	-0.0336247478143914	-0.0672494956287828
714	0	0	0	0	0	0	0	0	-0.0905797101449275	0	0	0	0	0	0	0	0	0	0	0	0	0	0	0	0	0	0	0	0	0	0	0	0	0	0	0	0	0	0	0	0	0	0	0	0	0	0	0	0
715	0	0	0	0	0	0	0	0	0	-0.012298610257041	0	0	0	0	0	0	0	0	0.0177777777777778	0	0	0	0	0	0	0.094368056409626	0	0	0	0	0	0	0	0	0	0	-0.0368958307711229	0	-0.031416663250386	0	0	0	0	0	0	-0.012298610257041	0	0	0
716	0	0	0	0	0	0	0	0	0	0	0	0	0	0	0	0	0	0	0	0	0	0	-0.0134408602150538	0	0	0	0	0	0	0	0	0	0	0	0	0	0	0	0	0	0	0	0	0	0	0	0	0	0
717	0	0	0	0	0	0	0	0	0	0	0	0	0	0	0	0	0	0	0	0	0	0	0	0	0	0	0	0	0	0	0	0	0	0	0	0	0	0	0	0	0	0	0	0	0	0	0	0	0
718	0	-0.00660894851629106	0	0	0	0.0108412836079792	0	0.0108412836079792	-0.0132178970325821	0.0216825672159584	0	0	0	0	0	0	0	0.0108412836079792	0	0	0	0	0	0	0	0	0	0	0	0	0	0	0	0	0	-0.00660894851629106	0	0	0	0	0	-0.00660894851629106	0	0	0	0	0	0	0
719	0.556338068478276	-0.0119189511323004	0	0	0.0373360667226436	0	0	0	0.150886054621702	-0.00595947556615018	0	0	0	0	0	0	-0.00595947556615018	0	0	-0.0266389511792661	0	0	0	0	-0.00595947556615018	0.0067490822290215	-0.0234430989331651	0.06156877231868	0.012313754463736	0	0.000789606662871301	-0.0353620500654654	-0.0178784266984505	0.308163813735605	0.0127085577951716	0.0202472466870644	19.2736990973387	0.596869987447018	0.085369248988665	-0.00595947556615018	0	0	-0.00595947556615018	0	0	0.0623583789815512	0.0186680333613218	0.0190628366927575	0.365427175003108
720	0	0	0	0	0	0	0	0	0	0	0	0	0	0	0	0	0	0	0	0	0	0	0	0	0	0	0	0	0	0	0	0	0	0	0	0	0	0	0	0	0	0	0	0	0	0	0	0.0112353238582102	0
721	0	0	0	0	0	0	0	0	0	0	0	0	0	0	0	0	0	0	0	0	0	0	0	0	0	0	0	0	0	0	0	0	0	0	0	0	0	0	0	0	0	0	0	0	0	0	0	0	0
722	0	0	0	0	0	0	0	0	0	0	0	-0.00875171387730097	0	0	0	0	0	0	0	0	0	0	0	0	0	0	0	0	0	0	0	0	0	0	0	0	0	0	0	0	0	0	0	0	0	0	0	0	0
723	0	0	0	0	0	0	0	0	0	0	0	0	0	0	0	0	0	0	0	0	0	0	0	0	0	0	0	0	0	0	0	0	0	0	0	0	0	0	0	0	0	0	0	0	0	0	0	0	0
724	0	0	0	0	0	0	0	0	0	0	0	0	0	0	0	0	0	0	0	0	0	0	0	0	0	0	0	0	0	0	0	0	0	0	0	0	0	0	0	0	0	0	0	0	0	0	0	0	0
725	0	-0.00903587241348152	0	0	0	0.0114207400639561	0	0	0	-0.00451793620674076	-0.00903587241348152	-0.0042661371125323	0	0.0228414801279123	0	0	0	-0.00451793620674076	0	-0.00451793620674076	0	-0.0135538086202223	0	0	-0.0225896810337038	-0.00451793620674076	0	0	0	0	0	0	0	0	0	0.0114207400639561	0	0	0	0	0	0	0	0	0	0	0	0	0
726	0	0	0	0	0	0	0	0	0	0	0	0	0	0	0	0	0	-0.00261516534382886	0	0	0	0	0	0	0	0	0	0	0	0	0	0	0	0	0	0	0	0	0	0	0	0	0	0	0	0	0	0	0
727	0	0	0	0	0	0	0	0	0	0	0	0	0	0	0	0	0	0	0	0	0	0	0	0	0	0	0	0	0	0	0	0	0	-0.0155884645362432	0	-0.0155884645362432	0	0	0	0	0	0	0	0.0285062713797035	0	0	0	0	0
728	0	0	0	0	0	0	0	0	0	0	0	0	0	0	0	0	0	0	0	0	0	0	0	0	0	0	0	0	0	0	0	0	0	0	0	0	0	0	0	0	0	0	0	0	0	0	0	0	0
729	0	0	0	0	0	0	0	0	0	0	0	0	0	0	0	0	0	0	0	0	0	0	0	0	0	0	0	0	0	0	0	0	-0.00452243125904486	0	0	0	0	0	0	0	0	0	0	0	0	0	0	0	0
730	0	0	0	0	0	0	0	0	0	0	0	0	0	0	0	0	0	0	0	0	0	0	0	0	0	0	0	0	0	0	0	0	0	0	0	0	0	0	0	0	0	0	0	0	0	0	0	0	0
731	0	0	0	0	0	0	0	0	0	0	0	0	0	0	0	0	0	0	0	0	0	0	0	0	0	0	0	0	0	0	0	0	0	0	0	0	0	0	0	0	0	0	0	0	0	0	0	0	0
732	-0.0143802128271498	0.408355373036376	0.019782393669634	0	0.181694202427311	0.0593471810089021	0	0	0	0.019782393669634	0.241079787565426	0	-0.0143802128271498	0	0.0125922872560591	0	-0.00719010641357492	0	-0.00719010641357492	0	0	-0.00719010641357492	0	0	0	0	0	0	0	0	-0.00719010641357492	0	0	0	-0.00719010641357492	0	0	0	0	0	0	-0.00719010641357492	-0.0449285640525403	0.18915313774537	0.102526223619563	0.019782393669634	-0.0143802128271498	0	0
733	0	0	0	0	0	0	0	0.00140874832711136	0	0	0	0	0	0	0	0	0	0	0	0	0	0	0	0	0	0	0	0	0	0	0	0	0	0	0	0	0	0	0	0	0	0	0	0	0	0	0	0	0
734	0	0	0	0	0	0	0	0	0	0	0	0	0	0	0	0	0	0	0	0	0	0	0	0	0	0	0	0	0	0	0	0	0	0	0	0	0	0	0	0	0	0	0	0	0	0	0	0	0
735	0	0	0	0	0	0	0	0	0	0	0	0	0	0	0	0	0	0	0	0	0	0	0	0	0	0	0	0	0	0	0	0	0	0	0	0	0	0	0	0	0	0	0	0	0	0	0	0	0
736	0	0	0	0	0	0	0	0	0	0	0	0	0	0	0	0	0	0	0	0	0	-0.00263928844783446	0	-0.00263928844783446	0	0	0	0	0.0271493212669683	0	0.00641048530782165	0	0.00377119685998718	0	0	0	0	0	0	0	0	0	0	0	0	0	0	0	0
737	0	0	0	0	0	0	0	0	0	0	0	0	0	0	0	0	0	0	0	0	0	0	0	0	0	0	0	0	0	0	0	0	0	0	0	0	0	0	0	0	0	0	0	0	0	0	0	0	0
738	0	0	0	0	0	0	0	0	0	0	0	0	0	0	0	0	0	0	0	0	0	0	0	0	0	0	0	0	0	0	0	0	0	0	0	0	0	0	0	0	0	0	0	0	0	0	0	0	0
739	0.00272197724427024	0	0	0	0	0	0	0	0	0	0	0	0	0	0	0	0	0	0	-0.00163153429485088	0	0.00273023750282661	0.00272197724427024	0.093104838167732	0.00436177179767749	0.120898742990091	0	-0.00163153429485088	-0.00326306858970176	0	0.0604989330463833	-0.00163153429485088	0.00272197724427024	0.0060015663510847	1.06721741167857	0.0087318038539112	0.00544395448854048	-0.00489460288455263	0.0038124201936896	0.228336284412845	0.00218088589883872	-0.0315319826890418	0.00272197724427024	0.0021974064159514	-0.71581419963458	0.004403073090459	0	-0.0195701512796542	-0.00489460288455263
740	0	0	0	0	0	0	0	0.0018620548179407	0	-0.00231943220299671	-0.003707836997023	0	-0.00915931630600828	-0.0162360254209769	0.00313204710598847	-0.00463886440599341	-0.0408187522449703	0	0	0	-0.00614568170599836	0	0	0	-0.00231943220299671	0	0	0	0.0243621744508946	0	0	0	0.00313204710598847	0	0	-0.00231943220299671	0	0	0	0	0.0009310274089704	-0.0190128350090296	-0.00927772881198683	0.00475727691197201	0.0096329663299226	0.026342641774814	-0.00231943220299671	-0.00846511390899503	-0.00231943220299671
741	0	0	0	0	0	0	0	0	0	0	0	0	0	0	0	0	0	0	0	0	0	0	0	0	0	0	0	0	0	0	0	0	0	0	0	0	0	0	0	0	0	0	0	0	0	0	0	0	0
742	0	0	0	0	0	0	0	0	0	0	0	0	0	0	0	0	0	0	0	0	0	0	0	0	0	0	0	0	0	0	0	0	0	0	0	0	0	0	-0.000334226833067066	0	0	0	0	0	0	0	0	0	0
743	0	0	0	0	0	0	0	0	0	0	0	0	0	0	0	0	0	0	0	0	0	0	0	0	0	0	0	0	0	0	0	0	0	0	0	0	0	0	0	0	0	0	0	0	0	0	0	0	0
744	0	0	0	0	0	0	0	0	0	0	0	0	0	0	0	0	0	0	0	0	0	0	0	0	0	0	0	0	0	0	0	0	0	0	0	0	0	0	0	0	0	0	0	0	0	0	0	0	0
745	0	0	0	0	0	0	0	0	0	0	0	0	0	0	0	0	0	0	0	0	0	0	0	0	0	0	0	0	0	0	0	0	0	0	0	0	0	0	0	0	0	0	0	0	0	0	0	0	0
746	0	0	0	0	0	0	0	0	0	0	0	0	0	0	-0.00510099979596001	0	0	0	0	0	0	0	0	0	0	0	0	0	0	0	0	0	0	0	0	0	0	0	0	0	0	0	0	0	0	0	0	0	0
747	0	0	0	0	0	0	0	0	0	-0.00337906332364669	0	0	-0.0101371899709401	0	0	0	0	0	0	0	0	0	0	0.00628891264700333	0	0	0	0	0	0	0	0	0.00628891264700333	0	0	0	0.00628891264700333	0	0	0	0	-0.00337906332364669	0	0.0125778252940067	-0.00337906332364669	-0.00675812664729337	0.0125778252940067	0	0
748	0	0	0	-0.0182415176942722	0	0	0	0	-0.0182415176942722	0	0	0	0	0	0	0	0	0	0	0	0	0	0	0	0	0	0	0.0314070351758794	0	0	0	0	0.0942211055276382	0	-0.0364830353885443	0	0	-0.0182415176942722	0	0	0	-0.0182415176942722	0	0	0	-0.109449106165633	0	0	0
749	0	0	0	0	0	0.00331751982218094	0	0	0	0	0	0	0	0	0	0	0	0	0	0	0	-0.00415869583298678	0	-0.00623804374948016	0	0.00331751982218094	0.00455569172786849	0	-0.00207934791649339	0	0	0	0	0	0	0	0	0	0.00331751982218094	0	0	0.00331751982218094	0	0.00331751982218094	-0.00623804374948016	-0.00207934791649339	0	0	0
750	0	0	0	0	0	0	0	0	0	-0.0202142712755205	0	0	0	0	0	0	0	0	0	0	0	0	0	0	0	0	0	0	0	0	0	0	0	0	0	0	0	0	0	-0.040428542551041	0	0	0	0	0	0	0	0	0
751	0	0	0	0	0	0	0	0	0	0	0	0	0	0	0	0	0	0	0	0	0	0	0	0	0	0	0	0	0	0	0	0	0	0	0	0	0	0	0	0	0	0	0	0	0	0	0	0	0
752	0	0	0	0	0	0	0	0	0	0	0	0	0	0	0	0	0	0	0	0	0	0	0	0	0	0	0	0	0	0	0	0	0	0	0	0	0	0	0	0	0	0	0	0	0	0	0	0	0
753	0	0	0	0	0	0	0	0	0	0	0	0	0	0	0	0	0	0	0	0	0	0	0	0	0	0	0	0	0	0	0	0	0	0	0	0	0	0	0	0	0	0	0	0	0	0	0	0	0
754	0	0.0318274027024003	0	0	-0.0601612321020334	0	-0.0360967392612201	0	0	0	0	0	0.043859649122807	-0.0120322464204067	0	0	0	0.0756870518252073	0	0.0318274027024003	0.270920804598429	0.185336174632225	0	0	0	0	0	0	-0.07646281508126	-0.0240644928408134	-0.0120322464204067	0	0.0219298245614035	0	0	-0.07432814680185	0	0	0	0	0	-0.0481289856816268	0	-0.5965619439044	0.0098975781409968	0	0	0	0.0219298245614035
755	0	0	0	0	0	0	0	0	0	0	0	0	0	0	0	0	0	0	0	0	0	0	0	0	0	0	0	0	0	0	0	0	0	0.00203037440103955	0	0	0	0	0	0	0	0	0	0	0	0	0	0	0
756	0	-0.0124703828407532	0	0	0	0	0	-0.00623519142037661	0	0	-0.0124703828407532	0	0	0	-0.00623519142037661	0	0	0	0	0	0	0	0	-0.00623519142037661	0.0130701869036727	0	-0.00623519142037661	0	0	0	0	0	-0.00623519142037661	0	-0.00623519142037661	0	-0.0124703828407532	0	0	0	-0.0056353873574571	0.0199051823869688	0	-0.0124703828407532	0	0	-0.0187055742611298	0	0
757	0	0	0	0	0	0	0	0	0	0	0	0	0	0	0	0.00913742690058479	0	0	0	0	0	0	0	0	0	0	0	0	0	0	0	0	0	0	0	0	0.0054537989354652	0	0	0.0229700080350581	0	0	0	0	0.00913742690058479	0	0	0.0049480358010808	0
758	0.121038183838874	-0.15581177937052	0	-0.11666946464341	0	-0.186974135244625	0	-0.124649423496416	0	-0.136240622006965	0.0253667566188298	0	0	-0.11666946464341	0.0565291124929339	0	0.163791738223527	-0.0934870676223123	-0.0057955992552743	0.807367492607083	-0.0311623558741041	0	0	-0.0311623558741041	0.0565291124929339	0	1.41398529186127	0.0565291124929339	0.364541431576433	0	0	0	0	0.423254903667099	0	0	0.538497488250702	0.0565291124929339	-0.0311623558741041	0	0.0818958691117639	0.027551116216562	0.0565291124929339	0.03914231472711	1.53511155471618	0.002184359597732	0.0818958691117639	-0.786281376167684	-0.161607378625795
759	0	0	0	0	0	0	0	0	0	0	0	0	0	0	0	0	0	0	0	0	0	0	0	0	0	0	0	0	0	0	0	0	0	0	0	0	0	0	0	0	0	0	0	0	0	0	0	0	0
760	0	0	-0.00957652601942119	0	0	0	0	0	0	0	0	0	0	0	0	0	0	-0.00191530520388424	0	0	0	0	0	0	0	-0.00191530520388424	0	0	0	0	0	0	0	0	0	0	0	0	0	0	0	0	0	0	-0.00191530520388424	0	0	0	0
761	0	0	0	0	0	0	0	0	0	0	0	0	0	-0.00585137507314219	0	0	0	-0.0278276491495528	0	0	0	0	-0.0117027501462844	0	0	-0.00585137507314219	0	0	0.0204125776517429	0	0	-0.0234055002925688	0	0	0	0	0	0	0	0	0	0	0	0	0	0	0	0	0
762	0	0	-0.0308573947542429	0	-0.00881639850121226	0	0	-0.00440819925060613	0	0	-0.00881639850121226	0	-0.00440819925060613	0	-0.00440819925060613	0	0	0	0	0	0	-0.00440819925060613	0	0	0	0	0	0	0	0	0	0	0	0	0	0	0	0	-0.00440819925060613	0	0	0	0	-0.00440819925060613	0.0108920596884871	0.0085595216251558	0	-0.00440819925060613	0
763	0	0	0	-0.0218197687104517	0	0	0	0	0	0	0	0	0	0	0	0	0	0	0	0	0	0	0	0	0	0	0	0.0503271263210871	0	0	0	0	0	0	0	0	0	0	0	0	0	0	0	0	0	0	0	0	0
764	-0.00434933890048713	0	0	0	0	-0.0130480167014614	0	0	0	-0.00434933890048713	0	0.00693962526023595	-0.00434933890048713	0	0	0.00693962526023595	0	-0.00434933890048713	-0.00869867780097425	0	0	0	0	0	-0.00434933890048713	0.0138792505204719	0	0	0	0.00518057271949765	0	0	0	0	0	0	0	0	-0.0130480167014614	-0.0148070692421997	-0.0260960334029228	0.00693962526023595	0	0	0	0	0	0	0
765	0	0	0	0	0	0	0	0	0	0	0	0	0	0	0	0	0	0	0	0	0	0	0	0	0	0	0	0	0	0	0	0	0	0	0	0	0	0	0	0	0	0	0	0	0	0	0	-0.0020671858139516	0
766	0	0	0	0	0	0	0	0	0	0	0	0	0	0	0	0	0	0	0	0	0	0	0	0	0	0	0	0	0	0	0	0	0	0	0	0	0	0	0	0	0	0	0	0	0	0	0	0	0
767	0	0	0	0	0	0	0	0	0	0	0	0	0	0	0	0	0	0	0	0	0	0	0	0	0	0	0	0	0	0	0	0	0	0	0	0	0	0	0	0	0	0	0	0	0	0	0	0	0
768	0	0	0	0	0	0	0	0	0	0	0	0	0	0	0	0	0	0	0	0	0	0	0	0	0	0	0	0	0	0	0	0	0	0	0	0	0	0	0	0	0	0	0	0	0	0	0	0	0
769	0	0	0	0	0	0	0	0	0	0	0	0	0	0	0	0	0	0	0	0	0	0	0	0	0	0	0	0	0	0	0	0	0	0	0	0	0	0	0	0	0	0	0	0	0	0	0	0	0
770	0	0	0	0	0	0	0	0	0	0	0	0	0	0	0	0	0	0	0	0	0	0	0	0	0	0	0	0	0	0	0	0	0	0	0	0	0	0	0	0	-0.00551267916207277	0	0	0	0	0	0	0	0
771	0	0	0	0	0	0	0	0	-0.0018216263480035	0	0	0	0	0	0	0	0	0	0	0	0	0	0	0	0	0	0	0	0	0	0	0	0	0	0	0	0	0	0	0	0	0	0	0	0	0	0	0	0
772	0	0	0	0	0	0	-0.0361532899493854	0	0	0	0.168067226890756	0	0	0	0	0	0	0	0	0	0	0	0	0	0	0	0	0	0	0	0	0	0	0	0	0	0	0	0	0	0	0	0	0	0	0	0	0	0
773	0	0	0	0	0	0	0	0	0	0	0	0	0	0	0	0	0	0	0	0	0	0	0	0	0	0	0	0	0	0	0	0	0	0	0	0	0	0	0	0	0	0	0	0	0	0	0	0	0
774	-0.0100664384940608	0	-0.0626102269480179	0	0.0056432465267545	0	0	0	-0.00724481523068353	0	-0.0289792609227341	0	0	0	0	0	0	0	0	0	0.0157096850208153	0	0	0	0	0	0	0	0.00282162326337727	0	0	0	-0.050332192470304	-0.0100664384940608	0	0	0	0.0157096850208153	0.0134980890371622	0	0	-0.0050332192470304	0	0	0	0.0118965203332332	0	-0.0150996577410912	0
775	0	-0.000245120268259622	0	0	0	0	0	0	0	0	0	0	0	0	0	0	0	0	0	0	0	0	0	0	0	0	0	0	0	0	0	0	0	0	0	0	0	0	0	0	0	0	0	0	0	0	0	0	0
776	0	0	0	0	0	0	0	0	0	0	0	0	0	0	0.00096976768644924	0	0	0	0	0	0	0	0	0	0	0	0	0	0	0	0	0.00261745844784714	0	0	0	0	0	0	0	0	-0.0016476907613979	0	0	0	0	0	0	0	0
777	0	0	0	0	0	0	0	0	0	0	0	0	0	0	0	0	0	0	0	0	0	0	0.0251256281407035	0	0	0	0	0	0	-0.0220994475138122	0	0	0	0	0	0	0	0	0	0	0	0	-0.0110497237569061	0	-0.0110497237569061	0	0	0	0
778	0	0	0	0	0	0	0	0	0	0	0	0	0	0	0	0	0	0	0	0	0	0	0	0	0	0	0	0	0	0	0	0	0.128949065119278	0	0	0	0	0	0	0	0	0	0	0	0	0	0	0	0
779	0	0	0	0	0	0	0	-0.00150963904530427	-0.0046070187559331	0	0	-0.00150963904530427	0	0	0	0	0	0	0	0	0	0	0	0	0	0	0	0	0	0	0	0	0	0	0	0	0	0	0	0	0	0	0	0	0	0	0	0	0
780	0	0	0	0	0	0	0	0	0	0	0	0	0	0	0	0	0	0	0	0	0	0	0	0	0	0	0	0	0	0	0	0	0	0	0	0	0	0	0	0	0	0	0	0	0	0	0	0	0
781	0	0	0	-0.00395022713806044	0	0	0	0.0222861627346931	0	0	0	0	0	-0.00395022713806044	0	0	0	0	0	0	0	0	0	0	0	0	0	0	0	0	0	0	0	0	0	0	0	0	0	0	0	0	0	0	0	0	0	0	0
782	-0.0849378378839298	-0.0209424083769634	0	0	-0.0209424083769634	-0.06282722513089	0	0	0	-0.0209424083769634	0	-0.0418848167539267	-0.0209424083769634	0	0.0814332247557003	0	0	0	-0.0837696335078534	-0.0209424083769634	0	-0.0209424083769634	0	0	0	0	0	0	0	0	0	0	-0.0209424083769634	0	0	-0.0209424083769634	0	0	0	0	0.0407166123778502	0	-0.0209424083769634	0	0	0	0	0	0
783	0	0	0	0	0	0	0	0	0	0	0	0	0	0	0	0	0	0	0	0	0.00248860119762299	0	0	0	0	0	0	0	0.182071444377409	0	0.059860947726596	0	0	0	0	0	0	0	0	0	-0.172117039586919	0	0	0	0	0.119721895453191	0	-0.28188453024962	0
784	0	0	0	0	0	0	0	0	0	0	0	0	0	0	0	0	0	0	0	0	-0.00148495738172314	0	0	0	0	0	0	0	0	0	0	0	0	0	0	0	0	0	0	0	0	0	0	-0.00148495738172314	0	0	-0.00148495738172314	0	0
785	0	0	0	0	0	-0.00962927298988926	0	-0.0288878189696678	0	0	0	0	-0.00962927298988926	0	0	0	-0.00962927298988926	0	0	0	0	0	-0.00962927298988926	0	-0.00962927298988926	0	0	0	0	0	0	0	0	0	0	0	0	0	0	0	0	0	0	0	0	0	0	0	0
786	0.00337325012649688	0	0	0	0	0	0	0	0	0	0	0	0.0134930005059875	0	0	0	0	0	0	0	0	0	0	0	0	0	-0.00408939415625575	0.00337325012649688	0	0	0	0	-0.00204469707812788	0	0.00470180317486588	0	0	0.0174786596510946	0	-0.00204469707812788	0.00337325012649688	-0.0081787883125115	-0.00204469707812788	0	0	0	0	0	0
787	0	0	0	0	0	0	-0.00275277341921986	0	0	0	0	0	0	0	0	0	0	0	0	0	0	0	-0.00137638670960993	0	0	0	0	0	-0.00137638670960993	0	0	0	0	0	0.00217042469027207	0	0.00246159905474596	0	0	0	0	0	0.00246159905474596	0	-0.0041291601288298	0	0	0	-0.00550554683843973
788	0	0	0	0	0	0	0	0	0	0	0	0	0	0	0	0	0	0	0	0	0	0	0	0	0	0	0	0	0	0	0	0	0	0	0	0	0	0	0	0	0	0	0	0	0	0	0	0	0
789	-0.0877706260971328	-0.0585137507314219	0	-0.0292568753657109	0	0.131527619516902	-0.175541252194266	-0.0036891893279131	0.164473684210526	-0.175541252194266	-0.117027501462844	0.0803922474413071	0	0	0	0	0	0	-0.0292568753657109	-0.117027501462844	0	0	0	-0.0585137507314219	-0.0292568753657109	0	-0.0292568753657109	0	0	0.0255676860377979	-0.175541252194266	-0.117027501462844	0	-0.0292568753657109	-0.0877706260971328	0	-0.0292568753657109	-0.0877706260971328	0	0	0	0	0	0.109649122807018	-0.0585137507314219	0	-0.0877706260971328	0	0.0548245614035088
790	-0.0640294169150747	0	0	0	-0.114813300881466	-0.0827985924239288	0	-0.227696129165804	0	0	0	0	0	-0.0413992962119644	0	-0.144897536741875	0	0	0	0	-0.103498240529911	0	0	-0.124197888635893	0	0	0	-0.0413992962119644	0	0	0	0	0	0	0	0	0	0	0	0	0	-0.0206996481059822	0	0	0	0	0	0	0
791	0	0	0	-0.0208659363588941	0	0	0	0	0	0	0	0	0	0	0	0	0	0	0	0	0	0	0	0	0	0	0	0	0	0	0	0	0	0	0	0	0	0	0	0	0	0	0	0	0	0	0	0	0
792	0	0	0	0	0	0	0	0	0	0	0	0	0	0	0	0	0	0	0	0	0	0	-0.0031358120185222	0	0	-0.0031358120185222	0	0	0	0	0	0	0	0	0	0	0	0	0	0	0	0	0	0	0	0	0	0	0
793	0	0	0	0	0	0	0	0	0	0	0	0	0	0	0	0	0	0	0	0	0	0	0	0	0	0	0	0.0066916379339801	0	0	0	-0.0794657428816428	0	0	0	-0.0287191269385411	0	0	0	0	0	0	0	-0.0574382538770821	0	0	0	0	0
794	0	0	0	0	0	0	0	0	0	0	0	0	0	0	0	0	0	0	0	0	0	0	0	0	0	0	0	0	0	0	0	0	0	0	0	0.00689468896888119	-0.000691512718647678	0	-0.00138302543729536	0.00159108206974181	-0.000691512718647678	0	0.00392058146184404	0	0	-0.00172878179661919	0	0	0
795	0	0	0	0	0.0108354101202731	0	0	0	0	0.00541770506013653	0	0	0	0.0270885253006826	0	-0.00310154456919546	0	0	0	0	0	0	-0.00310154456919546	0	0	0	0	0	0	0	0	0	0	0	0	0	0	0	0	0	0	0	0	0	0	0	0	0	0
796	-0.0641193570596596	0.0639423195428219	-0.0674195179504467	-0.0168548794876117	0	0	0.0269323996768112	0	0	0	0	0	0	0	0	0	0	0	0	0	0.0269323996768112	0	0.0269323996768112	-0.0168548794876117	0	0	0.0807971990304336	-0.0168548794876117	0	0	0	0	0	0	0	0	0	0	0	0	0	0	0	0	0	0.0269323996768112	0	0	-0.0168548794876117
797	0	0	0	0.00479616306954436	0	0	0.00479616306954436	0	0	0	0	0	0	0	0	-0.00482404303046383	0	0	0	0	0	0	0	0	0	0	0	0	0	0	0	-0.00241202151523192	0	0	-0.00241202151523192	0	0	0	0	0	0	0	0	0	-0.00241202151523192	0	0	0	0
798	0	0	0	0	0	0	0	0	0	0	0	0	0	0	0	0	0	0	0	0	0	0	0	0	0	0	0	0	0	0	0	0	0	0	0	0	0	0	0	0	0	0	0	0	0	0	0	0	0
799	0	0	0	0	0	0	0	0	0	0	0	0	0	0	0	0	0	0	0	0	0	0	0	0	0	0	0	0	0	0	0	0	0	0	0	0	0	0	0	0	0	0	0	0	-0.00815793767335618	0	0	0	0
800	0	0	0	0	0	0	0	0	-0.0129282482223659	-0.00646412411118293	0	0	0	0	0	0	0	0	0	0	0	0	0	0	0	0	0	0	0	0	0	0	0	0	0	0	0	0	0	0	0	0	0	0	0	0	0	0	0
801	0	0	0	0	0	0	0	0	0	0	0	0	0	0	0	0	0	0	0	0	0	0	0	0	0	0	0	0	0	0	0	0	0	0	0	0	0	0	0	0	0	0	0	0	0	0	0	0	0
802	0	0	0	0	0	0	0	0	0	0	0	0	0	0	0	0	0	0	0	0	0	0	0	0	0	0	0	0	0	0	0	0	0	0	0	0	0	0	0	0	0	0	0	0	0	0	0	0	0
803	0	0	0	0	0	0	-0.0200682319887618	0	0	0.0186567164179104	0	0	0	0	0	0	0	0	0	0	0	0	0	0	0	0	0	0	0	0	0	0	0	0	0	0	0	0	0	0	0.0186567164179104	0	0	0	0	0	0	0	0.0186567164179104
804	0	0	0	0	0	0	0	0	0	0	0	0	0	0	0	0	0	0	0	0	0	0	0	0	0	0	0	0	0	0	0	0	0	0	0	0	0	0	0	0	0	0	0	0	0	0	0	0	0
805	0	0	0	0	0	0	0	0	0	0	0	0	0	0	0	0	0	0	0	0	0	0	0	0	0	0	0	0	-0.00207819546997029	0	0	-0.00687876182287188	0	0	0	0	0	0	0	0	-0.00687876182287188	0	0	0	0	0	0	0	0
806	0	0	-0.0123031496062992	0	-0.00615157480314961	0	0	0	0	0	0	0	0	0	-0.00615157480314961	0	0	0	0	0	0	-0.00615157480314961	0.0377287304282211	0	0	0	0	0	0.0446995868406942	0	0	0	0	0	-0.0049226523891645	0	0	0	0	0	0.000409640804661701	0	0	0	0	-0.00615157480314961	0.0377287304282211	0	-0.0246062992125984
807	0	0	0	0	0	0	0	0	0	0.0300932891965092	0.0601865783930184	0	0	0	0	-0.0144843568945539	0	0	-0.0144843568945539	0	0	0	-0.0144843568945539	0	0	0	0	0	0	0	-0.0144843568945539	0	0	0	0	0	0.0011245754074014	0	0	0	0	0	0	0	0	0	0	0	0
808	0	0	0	0	0	0	0	0	0	0	0	0	0	0	0	0	0	0	0	0	0	0	0	0	0	0	0	0	0	0	0	0	0	-0.0269832703723691	0	0	0	0	0	0	0	0	0	0	0	0	0	0	0
809	0	0	0	0	0	0	0	0	0	0	0	0	0	0	0	0	0	0	0	0	0	0	0	0	0.306772561125858	0	0	0	0	-0.235432607416127	0	0.071339953709731	0	0	0	0	0	0	0	-0.0588581518540318	0	0	0	0	-0.117716303708064	0	-0.0588581518540318	0	0
810	0	0	-0.244977951984321	0	0	0	0	0.234375	0	0.15625	-0.195982361587457	0	0	0	0	-0.051675036746693	0	0	0.311160276825086	0	0	0.5640617344439	0	-0.97064857912788	0.078125	-0.391964723174914	-0.0979911807937286	0	-0.0489955903968643	0	0.107254409603136	0	0	-0.146986771190593	0	-0.422433855952964	-0.0979911807937286	-0.146986771190593	0	0.078125	0	0.038392638412543	0	-0.146986771190593	0.078125	0	0	0	0
811	0	0	0	0	0	0	-0.00481486831335163	0	0	0	0	0	0	0	0	0	0	0	0.0186950831931202	-0.00481486831335163	0	0	0	0	0	0	0	0	0	0	0	-0.00481486831335163	0	0	0	0	0	0	0	0	0	0	0	0	0.0093475415965601	0	0	0	0
812	0	0	0	0	0	0	0	0	0	0	0	0	0	0	0	0	0	0	0	0	0	0	0	0	0	0	0	0	0	0	0	0	0	0	0	0	0	0	0	0	0	0	0	0	0	0	0	0	0
813	0	0	0	0	0	0	0	0	0	0	0	0	0	0	0	0	0	0	0	0	0	0	0	0	0	0	0	0	0	0	0	0	0	0	0	0	0	0	0	0	0	0	0	0	0	0	0	0	0
814	0	0	0	0	0	0	0	0	0	0	0	0	0	0	0	0	0	0	0	0	0	0	0	0	-0.00956205775482884	0	0	0	-0.00956205775482884	0	0	0	0	0	0	-0.00956205775482884	0	0	-0.0191241155096577	0	0.00921728496817586	0	0	0	0	0	0	0	0
815	-0.146842878120411	0.120893693393459	0	0	-0.0734214390602056	0.010761534803151	0.0420914869316781	0.126274460795035	-0.146842878120411	0.0841829738633564	-0.110132158590308	-0.220264317180617	0.814925901625682	-0.172792062847363	-0.0680406716586301	0.0841829738633564	0	-0.0367107195301028	0.325970360650275	-0.110132158590308	-0.0680406716586301	0	0.157604412923562	0.00538076740157531	0.047472254333254	-0.0367107195301028	-0.110132158590308	-0.0367107195301028	0.0788022064617809	0	-0.146842878120411	-0.0367107195301028	0	0	-0.0367107195301028	0	0	-0.0367107195301028	0	0.241787386786918	0.047472254333254	-0.0734214390602056	0	-0.0313299521285271	-0.0734214390602056	0.157604412923562	-0.0680406716586301	-0.209502782377466	0.06361455653798
816	0	0	-0.0021579772373312	0	0	-0.00892458723784025	0	0	0	0	0	0	0	0	0.152888696197346	-0.0110825644751714	0	-0.0110825644751714	0.0224578072388583	0	-0.0267737617135207	0	-0.00892458723784025	0	0	-0.00892458723784025	-0.0021579772373312	0	-0.0267737617135207	0	0	0	0.0046086327631779	0	0	0.0181418527641959	0	0	-0.0178491744756805	0	0	0	0	-0.0021579772373312	0	0	0	0	0.0313823944766986
817	0	0	0	0	0	0	0	0	0	0	0	0	0	0	0	0	0	0	0	0	0	0	0	0	0	0	0	0	0	-0.0292312189418299	0	0	0	0	0	0	-0.0292312189418299	0	0	0	0	0	0	0	0	0	-0.0292312189418299	0	0
818	0	0	0	0	0	0	0	0	0	0	0	0	0	0	0	0	0	0.00359945288316176	0	0	0	0	0	0	0	0	0	0	-0.00785761992692413	0	0	0	0	0	0	0	0	0	0	0	0	0	0	0	0	0	0	0	0
819	0	0	0	0	0	0	0	0	0	0	0	0	0	0	0	0	0	0	0	0	0	0	0	0	0	0	0	0	0	0	0	0	0	0	0	0	0	0	0	0	0	0	0	0	0	0	0	0	0
820	0	0	0	0	0	0	0	0	0	0	0	0	0	0	0	-0.036941263391208	0	0	0	-0.036941263391208	0	0	0	0	0	0	0	0	0	0	0	0	0	0	0	0	0	0	0	0	0	0	0	0	0	0	0	0	0
821	0	0	0	0	0	0	0	0	0	0	0	0	0	0	0	0	0	0	0	0	0.0101419878296146	0	0	0	0	0	0	0	0	0	0	0	0	0.0202839756592292	0	0	0	0	0	0	0	0	0	0	0	0	0	0	0
822	0	0	0	0	0.187758167480285	0	-0.0995421063109695	0	0	0	0	0	0	-0.0398168425243878	0	0.0375516334960571	0	0	0	-0.0199084212621939	0	0	0.0375516334960571	0	0.11038969145984	0	0	0	0	0	-0.159267370097551	-0.0199084212621939	0	-0.0199084212621939	0	-0.0398168425243878	0	-0.0398168425243878	0	0	0.0375516334960571	0.0904812701976463	0	0	0	0.0375516334960571	-0.122672656587059	-0.0398168425243878	0.0375516334960571
823	0	0	0	0	0	0	0	0	0	0	0	0	0	0	0	0	0	0	0	0	0	0	0	0	0	0	0	0	0	0	0	0	0	0	0	0	0	0	0	0	0	0	0	0	0	0	0	0	0
824	0.0192246074975969	0	0	0	0	0	0.00640820249919897	0	0	-0.00455684666210982	0	0	0	0	0	-0.0118191841492403	0	0	0	0	0	-0.00455684666210982	0	0	0	0	0	-0.00270549082502067	0	0	0.0146677608354871	0	-0.0163760308113501	0	0	0	0	0	0	0	0	0	0	0	0	0	0	0	0
825	-0.0665631240292878	0	-0.411284993251792	0.040016006402561	0.0312971871686326	0	0	0	-0.0221877080097626	-0.039625346477619	-0.0221877080097626	0	0	0	-0.084000762497145	0	-0.0221877080097626	0	-1.50245143542218	-0.0665631240292878	-0.288440204126914	0.040016006402561	-0.0221877080097626	0	0.00475006954190599	0	-0.0221877080097626	0	0	0.0800320128051221	0	0.026937777551668	-0.0221877080097626	0	0	0	-0.0221877080097626	0	-0.0443754160195252	0	0	0	0	-0.13748565767554	0	-0.0443754160195252	0	0	-0.0221877080097626
826	0	0	0	0	0	0	0	0	0	0	0	0	0	0	0	0	0	0	0	0	0	0	-0.00163644694639	0	0	0	0	0	0	0	0	0	0	0	0	0	0.00233083933524462	0	0	0	0	0	0	0	0	0	0	-0.00490934083916999	0
827	0	0	0	0	0	0	0	0	0	0	0	0	0	0	0	0	0	0	0	0	0	0	-0.00453944411080609	-0.0020127609041322	0	0	0	0	-0.00805104361652879	0	0.00117053316857424	0	-0.00168445547111592	0	0.00318329407270644	0	0	0	-0.00369721637524813	0.00117053316857424	0	0	0	0	0.00636658814541287	0.0127331762908257	0.00636658814541287	-0.00486774954382235	0
828	0	0	0	0	0	0	0	0	0	0	0	-0.0120612712579906	0	0.0214454214025306	0	0	0	0	0	-0.0120612712579906	0	-0.0361838137739718	0.0214454214025306	-0.0120612712579906	0	0	0	0	-0.0120612712579906	0	0	0	-0.0241225425159812	0	0	0	0	0	-0.0120612712579906	0	0	-0.0241225425159812	0	0	-0.0120612712579906	0	0	0	0
829	0	0	0	0	0	0	0	0	0	0	0	0	0	0	0	0	0	0	0	0	0	0	0	0	0	0	0	0	0	0	0	0	0	0	0	0	0	0	0	0	0	0	0	0	0	0	0	0	0
830	0	0	0	0	0	0	0	0	0	0	0	0	0	0	0	0	0	0	0	0	0	0	0	0	0	0	0	0	0	0	0	0	0	0	0	0	0	0	0	0	0	0	0	0	0	0	0	0	-0.00774233508826262
831	0	0	0	0	0	0	0	0	0	0	0	0	0	0	0	0	0	0	0	0	0	0	0	0	0	0	0	0	0	0	0	0	0	0	0	0	0	0	0	0	0	0	0	0	0	0	0	0	0
832	-0.134108180599017	0	0	0	0	0	0	0	0	-0.0447027268663388	0	0	0	0	0	0	-0.0447027268663388	0	-0.0447027268663388	0	0	0.0723065798987708	0	0	0	-0.0447027268663388	0	0	0	0	0	0	0	-0.0447027268663388	0	-0.0894054537326777	0	0	0	0	0	0	0.0999104329312032	0	0	0	0	0	0
833	0	0	0	0	0	-0.0278009452321379	0	0	0	0	0	0	0	0	0	0	0	0	0	0	0	0	0.05716082197262	0	0	0	0	0	0	0	0	0	0	0	0	0	0	0	0	0	0	0	0	0	0	0	0	0	0
834	0	0	0.102774922918808	0	-0.0371195248700817	0	0	0	0.102774922918808	0	0.205549845837616	0.102774922918808	0	-0.0371195248700817	0	0	0.168430320967534	0	0	0	0	0	0	0	-0.0371195248700817	0	0	0	0.0656553980487263	0	0	0	0	0	0	0	0	0	0	-0.0742390497401633	0	0	0	0	0	0	0	0	0
835	0	0	-0.039032006245121	-0.0195160031225605	-0.039032006245121	0	0	0.0381242851696531	0	0	-0.0195160031225605	0	0	0.0381242851696531	0	0	0	-0.039032006245121	0	0	0	0	0	0	0	0.0381242851696531	0	-0.039032006245121	0	-0.0195160031225605	0	0	-0.0195160031225605	-0.000907721075467903	0	0	0	0	0	0	0	0	-0.0195160031225605	0	0	0	0.0381242851696531	0	0
836	0	0	0	0	0	0	0	0	0	0	0	0	0	0	0	0	0	0	0	0	0	0	0	0	0	0	0	0	0	0	0	0	0	0	0	0	0	0	0	0	0	0	0	0	0	0	0	0	0
837	0	0	0	0	0	0	0	0	0	0	0	0	0	0	0	0	0	0	0	0	0	0	0	0	0	0	0	0	0	0	0	0	0	0	0	0	0	0	0	0	0	0	0	0	0	0	0	0	0
838	0	0	0	0	0	0	0	0	0	0	0	0	0	0	0	0	0	0	0	0	0	0	0	0	0	0	0	0	0	0	0	0	0	0	0	0	0	0	0	0	0	0	0	0	0	0	0	0	0
839	0	0	0	0	0	0	0	0	0	0	0	0	0	0	0	0	0	0	0	0	0	0	0	0	0	0	0	0	0	0	0	0	0	0	0	0	0	0	0	0	0	0	0	0	0	0	0	0	0
840	0	0	0	0	0	0	0	0	0	0	0	0	0	0	0	0	0	0	0	0	0	0	0	0	0	0	0	0	0	0	0	0	0	0	0	0	0	0	0	0	0	0	0	0	-0.0223363859727496	0	0	0	0
841	0	0	0	0	0	0	0	-0.000808074278187651	0	0	0	0	0	0	0	0	0	0	0	0	0	0	0	0	0	0	0	0	0	0	0	0	0	0	0	-0.000808074278187651	-0.0016161485563753	0	0	0	0	0	0	0	0	0	0	0	0
842	0	0	0	0	0	0	0	0	0	-0.00109870791948668	0	0	0	0	0	0	0	0	0	0	0	0	0	0	0	0	0	0	0	0	0	0	0	0	0	0	0	0	0	0	0	0	0	0	0	0	0	0	0
843	-0.0222795744232593	0	0.0467976403665859	-0.0454545454545455	-0.0227272727272727	0.0231749710312862	-0.0454545454545455	-0.0227272727272727	0	-0.0227272727272727	-0.045006847150532	0.0463499420625724	-0.0222795744232593	0.00134309491204039	-0.0454545454545455	0.0231749710312862	-0.0227272727272727	0.0231749710312862	-0.0909090909090909	0.0467976403665859	-0.113636363636364	-0.0227272727272727	-0.0904613926050778	-0.0454545454545455	0.0231749710312862	0	0	0.000447698304013498	0	-0.158195512482883	-0.0222795744232593	-0.0227272727272727	0.0231749710312862	0	0.0236226693352997	0	-0.0227272727272727	0	-0.0454545454545455	0	-0.113636363636364	0	-0.0227272727272727	0	0	0.0236226693352997	0	0	0.0245180659433266
844	0	0	0	0	0	0	0	0	0	0	0	-0.0421940928270042	0	0	0	0	0	-0.0421940928270042	-0.0843881856540084	0	-0.0843881856540084	0	0	0	0	0	0	0	0	0	0	0	0	0	0	0	0	0	0	0	0	0	0	0	0	0	0	0	-0.0843881856540084
845	0	0	0	0	0	0	0	0	0	0	0	0	0	0	0	0	0	0	0	0	0	0	0	0	0	0	0	0	0	0	0	0	0	0	0	0	0	0	0	0	0	0	0	0	0	0	0	0	0
846	0	0	0	0	0	0	0	0	0	0	0	0	0	0	0	0	0	0	0	0	0	0	0	0	0	0	0	0	0	0	0	0	0	0	0	0	0	0	0	0	0	0	0	0	0	0	0	0	0
847	0	0	0	0	0	0	0	0	0	-0.00227966990379793	0	0	0	0	0	0	-0.00683900971139379	0	0	0	0	0	-0.00227966990379793	0	-0.00455933980759586	0	0	0	0	0	0.00519480519480519	0	0	0	0	-0.00227966990379793	0	0	0.00519480519480519	0	0	0	0	0	0	-0.00227966990379793	0	0	0
848	0	0	0	-0.00138238018219771	0	0	0	0	0	0.00424634885078664	0	0	0.00562872903298435	0	0	-0.00138238018219771	0	0	0	0	0	0	0	0	0.00281436451649218	0	-0.00138238018219771	0	0	0	0	0	0	0	0	0	-0.00138238018219771	0	0	0	0	0	0	0	0	0	0	0	0
849	0	0	0	0	0	0	0	0	0	0	0	0	0	0	0	0	0	0	0	0	0	0	0	0	0	0	0	0	0	0	0	0	0	0	0	0	0	0	0	0	0	0	0	0	0	0	0	0	0
850	0	0	0	0	0	0	0	0	0	0	0	0	0	0	0	0	0	0	0	0	0	0	0	0	0	0	0	0	0	0	0	0	0	0	0	0	0	0	0	0	0	0	0	0	0	0	0	0	0
851	0	0	0	0	0	0.3014971405776	0	0	-0.042571306939123	-0.0212856534695615	0	-0.042571306939123	0	0	-0.091766471076816	0	0.010121849202309	0.0582750582750583	0	0	0	0	0	0	0	0	0	0	-0.0212856534695615	0	0	0.0369894048054968	0	0	0	0	0	0	0	0	0	0	0.174825174825175	0	0	0	0	0	0
852	0	-0.0180212650928095	0	0	0	0	0	0	-0.00901063254640476	0	0	-0.0180212650928095	0	0	0	0	0	0	0	0	0	0	0	0	0	0	0	0	0	0.0487685930260912	0	0	0	0	0	0	0	0.0487685930260912	0	0	0	0	0	0	0	0	0	0	0
853	0	0	0	0	0	0	0	0	0	0	0	0	0	0	0	0	0	0	0	0	0	0	0	0	0	0	0	0	0	0	0	0	0	0	0	0	0	0	0	0	0	0	0	0	0	0	0	0	0
854	0	0	0	0	0	0	0	0	0	0	0	0	0	0	0	0	0	0	0	0	0	0	0	0	0	0	0	0	0	0	0	0	0	0	0	0	0	0	0	0	0	0	0	0	0	0	0	0	0
855	0.0291900718767784	0	0	0	0	0	0	0	0	0	0	0	0	0	0	0	0	0	0	0	0	0	0	0	0	0	0	0	0	0	0	0	0	0	0	0	0	0	0	0	0	0	0	0	0	0	0	0	0
856	0	0.0159438775510204	0	0	0	0	0	0	0	0	0	0	0	0	0	0	0	0	0	0	0	0	0	0	0	0	-0.00908347715505495	0	0.0159438775510204	0	0	0	0	0	0	0	0	0	0	0	0	0	0	0	0	0	-0.00908347715505495	0	0
857	0	0	0	0	0	0	0	0	0	0	0	0	0	0	0	0	0	0	0	0	0	0	-0.013197835554969	0	0	-0.026395671109938	0	0	0	0	0	0	0	0	0	0	0	0	0	0	0	0	0	0	0	0	0	0	0
858	0	0	0	0	0	0	0	0	0	0	0	0	0	0	0	0	0	0	0	0	0	0	0	0	0	0	0.00565930956423316	-0.00184870221104784	0	0	0	0	0	0	0	0	0	0	0	0	0	0	-0.00184870221104784	0	0	0	0	0	0
859	0	0	0	0	0	0	0	0	0	0	0	0	0	0	0	0	0	0	0	0	0	-0.00438404208680403	0	0	0.0312331378319093	-0.00438404208680403	0	0	0	0	0	0	0	0	0	-0.00876808417360807	0	0	0	0	0	0	0	0	0	0	0	0	0
860	0	0	0	0	0	0	0	0.0049250519651564	0	0	0	0	0	0	-0.0132855055134848	0	0	0	0	-0.0132855055134848	0.0049250519651564	0	0	0.031496062992126	-0.0265710110269696	0	0	-0.0132855055134848	0	0	0.0994132409415344	0	0	0	0	0	0	0	0.0497066204707672	-0.0265710110269696	0	0	0	0	0	0	-0.0398565165404544	0	0
861	0	0	0	0	0	-0.0228362639872117	0	5.22091083383983e-05	0	0	0	0	0	0	0	0	0	0	0	0	0	0	0	0	0	0	0	0	0	0	0	0	0	0	-0.0228362639872117	0	0	0	0	0	0	0	0	-0.0456725279744234	0	0	0	0	0
862	0	0	0	0	0	0	0	0	0	0	0	0	0	0	0	0	0	0	0	0	0	0	0	0	0	0	0	0	0	0	0	0	0	0	0	0	0	0	0	0	0	0	0	0	0	0	0	0	0
863	0	0	0	0	0	0	0	0	0	0	0	0	0	0	0	0	0.0139198218262806	0	0.0139198218262806	0	0	0	0	0	0	0	0	0	0	0	0	0	0	0	0	0	0	0	0	-0.00780457348005931	0	0	0	0	0	0	0	0	0
864	0	0	0	0	0	0	0	0	0	0	0	0	0	0	0	0	0	0	0	0	0	0	0	0	0	0	0	0	0	0	0	0	0	0	0	0	0	0	0	0	0	0	0	0	0	0	0	0	0
865	0	0	0	0	0	0	0	0	0	0	0	0	0	0	0	0	0	0	0	0	0	0	0	0	0	0	0	0	0	0	0	0	0	0	0	0	0	0	0	0	0.0300120048019208	0	0	0	0	0	0.040956775157305	0	0
866	0	0	0	0	0.00063675575713896	0	0	0	0	0	0	0	0	0	0	0	0	0	0	0	0	0	0	0	0	0	0	0	0	0	0	0	0	0	0	0	0	0	0	0	0	0	0	0	0	0	0	0	0
867	0	0	0	0	0	0	0	0	0	0	0	0	0	0	0	0	0	0	0	0	0	0	0	0	0	0	0	0	0	0	0	0	0	0	0	0	0	0	0	0	0	0	0	0	0	0	0	0	0
868	0	0	0	0	0	0	0	0	0	0	0.0641025641025641	0	0	0	0	0	0	0	0	0	0	0	0	0	0	0	0	0	0	0	0	0	0	0	0	0	0	0	0	0	0	0	0	0	0	0	0	0	0
869	0	-0.0195102916788606	0	0	0	0	0	0	0	0	0	0	0	0	0	-0.0097551458394303	0.0188394875659382	-0.003354020564612	-0.0097551458394303	0.021215788163222	0	-0.0390205833577212	0	0	0	0	0	0	0	0	0	0	0	0	0	0	0	0	0	0	0	0	0	0	0	0	0	0	0
870	0	-0.0165234633179114	0	-0.0165234633179114	0.0283848992336077	-0.0330469266358229	0	0.0118614359156963	-0.0495703899537343	-0.0330469266358229	0	0	0	-0.0165234633179114	0	-0.0330469266358229	0.0686312343829118	-0.037708954038038	0	-0.0046620274022152	0	0	0	0	-0.0165234633179114	-0.0330469266358229	0	0.0118614359156963	-0.049157655133418	0	-0.0495703899537343	0	-0.101265426198418	0	0	0	0.0283848992336077	-0.0660938532716457	0	0.0118614359156963	0	0	0	0	-0.0165234633179114	0.0567697984672154	0	0.0237228718313925	-0.0139860822066454
871	0	0	0	0	0	0	0	0	0	0	0	0	0	0	0	0	0	0	0	0	0	-0.00176472664384287	0	0	0	0	0	0	0	-0.00176472664384287	-0.00529417993152861	0	0	0	0	0	0	0	0	0	0	0	0	0	0	0	0	0	0
872	0	0	0	0	0	0	0	0	0	0	0	0	0	0	0	0	0	0	0	-0.00210181176173862	0	0	0	0	0	0	0	0	0	0	0	-0.00024197230725032	0	0	0	0	0.00396165121622692	0	0	0	0	0	0	-0.00840724704695447	0	0	0	0	0
873	0	0	0	0	0	0.0709093966133147	0	0	0	0	0	0	0	-0.0108166576527853	0	0	0	0	0	0	0	0	0	0	0	0	0	0	0	0	-0.0052881044523506	0	0	0	0	0	-0.0108166576527853	0	-0.0108166576527853	0	0	0.03269042170644	0	0	0	0	0	0	0
874	0	-0.0405021099501999	0	0	0	0	0	0.0269287733943719	0	0	0	0	0	0	0	0	-0.00842886041807148	0	0	0	0	0	0	0	-0.00842886041807148	0	0	0	0	0	0	0	0	0	0.0134643866971859	0	0	0	0	0	0	0	0	0	0	0	0	0	0
875	0	0	0	0	0	0	0	0	0	0	0	0	0	0	0	0	0	0	0	0	0	0	0	0	0	0	0	0	0	0	0	0	0	0	0	0	0	0	0	0	0	0	0	0	0	0	0	0	0
876	0	0	0	0	0	0	0	0	0	0	0	0	0	0	0	0	0	0	0	0	0	0	0	0	0	0	0	0	0	0	0	0	0	0	0	0	0	0	0	0	0	0	0	0	0	0	0	0	0
877	0	0	0	0	0	0	0	0	0	0	0	0	0	0	0	0	0	0	0	0	0	0	0	0	0	0	0	0	0	0	0	0	0	0	0	0	0	0	0	0	0	0	0	0	0	0	0	0	0
878	0	0	0	0	-0.00961446014806269	0	0	-0.0128192801974169	0	-0.00961446014806269	0	-0.00320482004935423	0.00522356874216465	-0.00320482004935423	0	0	0	0	0	0	0	-0.00320482004935423	0	0	-0.00320482004935423	0	0	0	0	0	0	0	0	0	0	0	0	0	0	0	0	0	0	0	0	0	0	0	0
879	0	0	0	0	0	0	0	0	0	0	0	0	0	0	0	0	0	0	0	0	0	0	0	0	0	0	0	0	0	0	0	0	0	0	0	0	0	0	0.0106506388814192	0	-0.0046621133359752	0.001497131386361	0	0	-0.0046621133359752	0	0	-0.0195677382139735	0.0116126035457149
880	0	0	0	0	0	0	0	0	0	0	0	0	0	0	0	0	0	0	0	0	0	0	0	0	0	0	0	0	0	0	0	0	0	0	0	0	0	0	0	0	0	0	0	0	0	0	0	0	0
881	0	0	0	0	0	0	0	0	0	0	0	0	0	0	0	0	0	0	0	0	0	0	0	0	0	0	0	0	0	0	0	0	0	0	0	0	0	0	0	0	0	0	0	0	0	0	0	0	0
882	0	0	0	0	0	0	0	0	0	0	0	0	0	0	0	0	0	0	0	0	0	0	0	0	0	0	0	0	0	0	0	0	0	0	0	0	0	0	0	0	0	0	0	0	0	0	0	0	0
883	0	0	0	0.00581277065713372	0.00219677879662774	0	-0.00108706286484547	0	0	0	0	0	0	0	0	0	0	0	0	0	0	0	0	0	0	0	0	0	-0.00108706286484547	0	0	0	-0.00217412572969095	0	0.00290638532856686	0	0	-0.00108706286484547	0	0	0	0	0	0	0	0	0	0	0
884	0	0	0	0	0	0	0	0	0	0	0	0	0	0	0	0	0	0	0	0	0	0	0	0	0	0	0	0	0	0	0	0	0	0	0	0	0	0	0	0	0	0	0	0	0	0	0	0	0
885	0	0	0	0	0	0	0	0	0	0	0	0	0	0	0	0	0	0	0	0	0	0	0	0	0	0	0	0	0	0	0	0	0	0	0	0	0	0	0	0	0	0	0	0	0	0	0	0	0
886	0	0	0	0	0	0	-0.0082223318533136	0	0.0048907025028364	0	0.01311303435615	0	0	0	0	0	0	0	0	0	0	0	0	0	0	0	0	0.0524521374246001	0	0	0	0	0.0262260687123	0	0	0	0	0	0	0	0	0	0	0	0	0	0	-0.0231079224075816	0
887	0	0	0	0	0	0	0	0	0	0	0	0	0	0	0	0.000555133037632469	0	0	0	0	0	0.000555133037632469	0	0	0	0	0	0	0	0	0.000264274714721559	0	0	0	0	0	0	0	0	0.000555133037632469	-0.00029085832291091	0	0	0	0	0	0	0	0
888	0	0	0	-0.0201045436268597	0	0	0	0	0	0	0	0	-0.0201045436268597	0	0	0	0	0	0	0	0	0	0	0	0	0	0	0	0	0	0	-0.0201045436268597	0	0	0	0	0	0	0	0	0	0	0	0	0	0	0	0	0
889	0	0	0	0	0	0	0	0	0	0	0	0	0	0	0	0	0	0	0	0	0	0	0	0	0	0	0	0	0	0	0	0	0	0	0	0	0	0	0	0	0	0	0	0	0	0	0	0	0
890	0	0.00944978619858726	0.00708733964894044	0	-0.00122803354987658	0	0.00944978619858726	0	0.00944978619858726	0	0	0	0	0	0	-0.00122803354987658	0	0	0	0	0	0	0.00708733964894044	0.00236244654964681	0	0	0	0	0	-0.00122803354987658	0	0	0	0	0	0	-0.00245606709975317	0	0	0	-9.36205501063598e-05	-0.00368410064962975	0	0	0	-0.00122803354987658	0	0.00236244654964681	-0.00368410064962975
891	0	0	0	0	0	0	0	0	0	0	0	0	0	0	0	0	0	0	0	0	0	0	0	0	0	0	0	0	0	0	0	0	0	0	0	0	0	0	0	0	0	0	0	0	0	0	0	0	0
892	0	0	0	0	0	0	0	0	0	0	0	0.0446030330062444	0	0	0	0	0	0	0	0	0	0	0	0	0	0	0	0	0	0	0	0	0	0	0	0	0	0	0	0	0	0	0	0	0	0	0	0	0
893	0.000640942566010569	0	0	0	0	0	0	0	0	0	0	0	0	0	0	0	0	0	0	0	0	0	0	0	0	0	0	0	0	0	0	0	0	0	0	0	0.00134080609262288	0	0	0	0	0	0	0	0	0	0	0	0
894	0	0	0	0	0	0	0	0	0	0	0	0	0	0	0	0.0218672184280309	0	0	-0.00807297973682086	0.0126710593005575	0	0	0	0	0	0	0	0	0.0218672184280309	0	0	0.0091961591274734	-0.0242189392104626	0	0	-0.00807297973682086	0	0	0	0	0	0	0	0	0	0.00459807956373664	0	0	0
895	0	0	0	0	0	0	0	0	0	0	0	0	-0.00658457891617831	0	0	0	0	0	0	0	0	0	0	0	0	0	0	0	0	0	0	0	0	0	0	0	0	0	0	0	0	0	0	0	0	0	0	0	0
896	0	0	0	0	0	0	0	0	0	0	0	0	0	0	0	0	0	0	0	0	0	0	0	0.0204580505377159	0	0	0	0	0	0	0	0	0	0	0	0	0	0	0	0	0	0	-0.0167028561884082	0	0	0	0	0.0018775971746539	0
897	0	0	0	0	0	0	0	0	0	0	0	0	0	0	0	0	0	0	0	0	0	0	0	0	0	0	0	0	0	0	0	0	0	0	0	0	0	0	0	0	0	0	0	0	0	0	0	0	0
898	0	0	0	0	0	0	0	0	0	0	0	0	0	0	0	0	0	0	0	0	0	0	0	0	0	0	0	0	0	0	0	0	0	0	0	0	0	0	0	0	0	0	0	0	0	0	0	0	0
899	0	0	0	0	0	0	0	0	0	0	0	0	0	0	0	0	0	0	0	0	0	0	0	0	0	0	0	0	0	0	0	0	0	0	0	0	0	0	0	0	0	0	0	0	0	0	0	0	0
900	0	0	0	0	0	0	0	0	0	0	0	0	0	0	0	0	0	0	0	0	0	0	0	0	0	0	0	0	0	0	0	0	0	0	0	0	0	0	0	0	0	0	0	0	0	0	0	0	0
901	0	0	0	0	0	0	0	0	0	0	0	0	0	0.014421690222094	0	0	-0.00381854284405071	0	0	0	0	0	0	0	0	0	0	0	-0.00381854284405071	0	0	0	0	0	0	0	0	0	0	0	0	0	0	0	0	0	0	0	0
902	0	0	0	0	0	0	0	0	0	0	0	0	0	0	0	0	0	0	0	0	0	0	0	0	0	-0.00608902149424587	0	0	0	0	0	0	0	0	0	0	0	0	0	0	0	0	0	0	0	0	0	0	0
903	0	0	0	0	0	0	0	0	0	0	-0.0158152775581211	0	0	0	0	0	0	0	0	0	0	0	0	0	0	0	0	0	0	0	0	0	0	0	0	0	-0.00790763877906057	0	0	0	0	0	0	0	0	0	0	0	0
904	-0.0981206795962029	0.0799361521034697	-0.0623830318153462	-0.124766063630692	0	0	-0.0623830318153462	-0.0935745477230193	0.289184499710816	0.048744636195797	-0.0623830318153462	0.0844822839766529	-0.0935745477230193	-0.0623830318153462	0	-0.0311915159076731	0	0.137773052045633	-0.187149095446039	-0.0045461318731831	0.173510699826489	-0.187149095446039	-0.124766063630692	0.0844822839766529	0	0	0	0	0	0	-0.0311915159076731	-0.124766063630692	0	0	0	-0.0623830318153462	-0.0311915159076731	0	-0.0311915159076731	0	0	0.02664538403449	-0.187149095446039	-0.124766063630692	0	-0.0311915159076731	-0.0935745477230193	0	-0.0311915159076731
905	0	0	0	0.00233732236350037	0	0	0	0	0	0	0	0	0	0	0	0	0	0	0	0	0	0	0.00233732236350037	0	0	0	0	0	0	0	0	-0.00115924556298761	0	0	0	0	0	-0.00231849112597522	0	0	0	0	0	0	0	0	0	0.00233732236350037	0
906	0	0	0	0	0	0	0	0	0.166759310728182	0	0	0	0	0	0	0	0	-0.0431965442764579	0	0	0	0	0	0	0	0	0	0	0	0	0	0	0	0	0	0	0	0	0	-0.0431965442764579	0	0	0	0	0	0	0	0	0
907	0	-0.0283205890682526	0	0	0.0556173526140156	0	-0.0849617672047579	0	0	0	0	0	0.0262729380232731	0	0	0	-0.0566411781365052	0	0	-0.0283205890682526	0	0	0	0	0	0	0	0	0	0	0	0	0	0	0	0	0	0	0	0	0	0	0	0	0	0	0	0	0
908	0	0	0	0	0	0	0	0	0	0	0	0	0	0	0	0	0	0	0	0	0	0	0	0	0	0	0	0	0	0	0	0	0	0	0	0	0	0	0	0	0	0	0	0	0	0	0	0	0
909	0	0	0	0	-0.0252365930599369	0.0318471337579618	0	0	0	0	0	0	-0.0126182965299685	0	0	0	0	-0.0126182965299685	0.0318471337579618	0	-0.0126182965299685	0.127388535031847	0.0510759709859551	0.0318471337579618	-0.0126182965299685	0	0	0	0.0510759709859551	0	0	0	0	0	0	0	-0.0252365930599369	0	0	-0.0126182965299685	0	0	0	0	-0.0378548895899054	0	0	0	0
910	0	0	0	0	0	0	0	0	0	0	0	0	0	0	0	0	0	0	0	0	0	0	0	0	0.0146606069491277	0	0	0	0	0	0	0	0	0	0	0	0	0	0	0	0	0	0	0	0	0	0	0	0
911	0	0.0162372807967092	-0.00463596115064556	0	0	0	0	0	0	-0.00231798057532278	0.107586240557635	0.0216497077289457	-0.00231798057532278	0	0	0	0	-0.0139078834519367	0	-0.0054010101627867	0	0	-0.00231798057532278	0	-0.0162258640272595	0	-0.00463596115064556	-0.0107906035561235	-0.054843651256706	0	0	0	0	-0.0139078834519367	0	0	0	0	-0.00463596115064556	0	0	0	0.00155293156318168	0	0	0	0	0	0
912	0	0	0	0	0	0	0	0	0	0	0	0	0	0	0	0.00471453491113102	0	0.00194698170492063	0	0	0	0.00942906982226203	0	-0.00553510641242078	0	-0.00553510641242078	0	0	-0.00276755320621039	0	0	0	-0.00276755320621039	0	0	0	0	0	0	0	0	0	0	0	0	0	0	0	0
913	0	0	0	0	0	0	0	0	0	0	0	0	0	0	0	0	0	0	0	0	0	0	0	-0.00447587503356906	0	0	0	-0.00447587503356906	0	-0.00447587503356906	0	0	0	0	0	0	-0.00447587503356906	0	-0.00447587503356906	0	0	0	-0.00447587503356906	0	0	0	0	0	0
914	0	0	0	0	0	0	0	0	0	0	0	0	0	0	0	0	0	0	0	0	0	0	0	0	0	0	0	0	0	0	0	0	0	0	0	0	0	0	0	0	0	0	0	0	0	0.0115074798619102	-0.00688420762770205	0	-0.00688420762770205
915	0	0	0	0	0	0	0	0	0	0	0	0	0	0	0	0	0	0	0	-0.00524631446408898	0	0	0	0	0	0	0	0	0	0	0	0	0	0	0	0	0	0	0	0	0	0	0	0	0	0	0	0	0
916	-0.000423407669606527	0	0	0	0	0	0	0	0	0	0	0	-0.000635111504409791	0	-0.00105851917401632	0	0	0	-0.00206532995309625	0	0	0	0	0	0	0	0	0	0	0	-0.000211703834803264	0	0	0	0	0	0	0	0	0	0	0	0	0	0	0	0	0	0
917	0	0	0	0	0	0	0	0	0	0	0	0	0	0	0	0	0	0	0	0	0	0	-0.00260348867482426	0	0	0	0	0	0	0	0	0	0	0	0	0	0	0	0	0	0	0	0	0	0	0	0	0	0
918	0	0	0	0.0024043085208694	0	0	0	0	0	0	0	0	0	0	0	0	0	0	0	0	0	0	0	0	0	0	0	0	0	0	0	0	0	0	0	0	0	0	0	0	0	0	0	0	0	0	0	0	0
919	0	0	0	0	0	0	0	0	0	0	0	0	0	0	0	0	0	0	0	0	0	0	0	0	0	0	0	0	0	0	0	0	0	0	0	0	0	0	0	0	0	0	0	0	0	0	0	0	0
920	0	-0.0357142857142857	0	0	0	0	-0.0357142857142857	0	0	0	-0.0357142857142857	0	0	0	0	0	0	0	0	0	0	0	0	0	0	0	0	0	0	0	0	0	-0.0357142857142857	0	0	0	0	0	0	0	0	0	0	-0.0357142857142857	0	-0.0178571428571429	0	0	0
921	0	0	0	0	0	0.0220555800617556	0	0	0	0	-0.00860215053763441	0	0	0	0	0	0	0	0	0	0	0	0	0	0	0	0	0	0	0	0	0	0	0	0	0	0	0	0	0	0	0	0	0	0	0	0	0	0
922	0	0	0	0	0	0	0	0	0	0	0	0	0	0	0	0	0	0	0	0	0	0	0	0	0	0	0	0	0	0	0	0	0	0	0	0	0	0	0	0	0	0	0	0	0	0	0	0	0
923	0	0	0	0.0870322019147084	0	0	0	0	0	0	-0.0558035714285714	0	-0.111607142857143	0	0	0	0	-0.0558035714285714	0.0870322019147084	0	0	0	0.031228630486137	0	0	0	0	-0.111607142857143	0	0.031228630486137	0	0	0	0	0	0.031228630486137	0	0	0	0	0	0	0.0870322019147084	0	0	0	0	0	0
924	0	0.00331828887348205	0	0.0151469212767087	0.00476281196418365	0	0	-0.0014445230907016	0	0	0	0	0	0	0	0	0	0	0	0	0	0	-0.0014445230907016	0	0	0	0	0	0	0	0	0	0	0	-0.00722261545350802	0	0	-0.00288904618140321	0	0	0	0	0	0	0	-0.00288904618140321	0	0	0
925	0	0	0	0	0	0	0	0	0	0	0	0	0	0	0	0	0	0	0	0	0	0	0	0	0	0	0	0	0	0	0	0	0	0	0	0	0	0	0	0	0	0	0	0	0	0	0	0	0
926	0	0	0	0	0	0	0	0	0	0	0	0	0	0	0	0	0	0	0	0	0	0	0	0	0	0	0	0	0	0	0	0	0	0	0	0	0	0	0	0	0.0592417061611374	0	0	0	0	0	0	0	0
927	0	0	0	0	0	0	0	0	0	0	0	0	0	0	0	0	0	0	0	0	0	0	0	0	0	0	0	0	0	0	0	0	0	0	0	0	0	0	0	0	0	0	0	0	0	0	0	0	0
928	0	0	0	0	0	0	0	0	0	0	0	0	0	0	0	0	0	0	0	0	0	0	0	0	0	0	0	0	0	0	0	0	0	0	0	0	0	0	0	0	0	0	0	0	0	0	0	0	0
929	0	0	0	0	0.00682850216804944	0	0	0	0	0	0	0	0	0	0	0	0	0	0	0	0	0	0	0	0	0	0	-0.00216370599562931	0	0	0	0	0	0	0	0	0	0	0	0	0	0	0.0102427532520742	0	0	0	0	0	0
930	0	0	0	-0.0018639257388894	-0.00793084304861607	0.0139977603583427	-0.00793084304861607	0	-0.0158616860972321	0	-0.00793084304861607	0	0.041993281075028	-0.00793084304861607	0	-0.0158616860972321	-0.00793084304861607	0	0	0	-0.0097947687875055	0	-0.00793084304861607	0	0	-0.0158616860972321	0	0	0	0	-0.0158616860972321	-0.0177256118361216	-0.0158616860972321	0	0	0	-0.00793084304861607	0	0	0.0139977603583427	0	0	0	0	0	0	0	0	0
931	0	0	0	0	0	0	0	0	0	0	0	0	0	0	0	0	0	0	0	0	0	0	0	0	0	0	0	0	0	0	0	0	0	0	0	0	0	0	0	0	0	0	0	0	0	0	0	0	0
932	0	0	0	0	0	0	0	0	0	0	0	0	0	0	0	0	0	0	0	0	0	0	0	0	0	0	0	0	0	0	0	0	0	0	0	0	0	0	0	0	0	0	0	0	0	0	0	0	0
933	-0.0715898036474911	-1.9783530567335	0.016905771573748	-0.178313389559978	0.176991150442478	-0.32017075773746	0.0351337822649956	-0.106723585912487	0.176991150442478	-0.16008537886873	-0.106723585912487	0	0.265486725663717	-0.0533617929562433	0	-0.106723585912487	0	0	0	0	0	-0.0533617929562433	0	0	-0.0533617929562433	0	0	0	0	0.0884955752212389	0	0	-0.0533617929562433	0	-0.106723585912487	0	0	0	0	0	0	-0.106723585912487	0	0	0	0	0	0	0
934	0	0	0	0	0	0	0	0.00877731940665321	0	0	0	-0.00330371006640457	-0.00660742013280914	0	-0.00330371006640457	0.0614412358465725	0	0	0	0.0065096978215322	0	0	0.0142509287469018	0	-0.0055713316515256	0	0	-0.0165185503320229	0	-0.0320010121827622	0	0.0229305258422781	-0.0320010121827622	-0.00330371006640457	0.101633233568326	0.00216989927384407	-0.0165185503320229	0	-0.0143486510581788	-0.00330371006640457	0	0	0	-0.00991113019921372	0	0	0	0	0
935	0	0	0	0	0	0	0	0	0	0	0	0	0	0	0	0	0	0	0	0	0	0	0	0	0	0	0	0	0	0	0	0	0	0	0	0	0	0	0	0	0	0	0	0	0	0	0	0	0
936	0	0	0	0	0	0	0	0	0	0	0	0	0	0	0	0	0	0	0	0	0	0	0	0	0	0	0	0	0	0	0	0	0	0	0	0	0	0	0	0	0	0	0	0	0	0	0	0	0
937	0	0	0	0	0	0	0	0	0	0	-0.0273822562979189	0	0	0	0	0	0	0	0	0	0	0	0	0	0	0	0	0	0	0	0	0	0	0	0	0	0	0	0	0	0	0	0	0	0	0	0	0	0
938	0	0.0451680248666656	0	0	0.0451680248666656	0	-0.023536434270163	0	0	0.0286284066270721	-0.0260824204486176	0	0	0	0	0	0	0	0	0	0	0	0	0	0	0	0	0	0	0	0	0	0	0	0	0	0	0	0	-0.0521648408972353	0	0	0	0	0	0	0	0	0
939	0	-0.0149644594089039	0	0	0	0.0412456176531244	0	0	0	0	0	0	0	0	-0.0149644594089039	0	0	0	0	0	0	0	0	0	0	0	0	0.0206228088265622	0	-0.00748222970445193	0	0.233069372181675	0	0	-0.00748222970445193	0.148754256588633	0	-0.0018238802867936	0	0	-0.0149644594089039	0	0	0	0.0301156273750852	0	0	0	0.0469039670707826
940	0	0	0	0	0	0	0	0	0	0	0	0	0	-0.088809946714032	0	0	0	0	0	-0.088809946714032	0	0	0	0	0	0	0	0	0	0	0	0	0	0	0	0	0	0	0	0	0	0	0	0	0	0	0	0	0
941	0	0	0	0	0	0	0	0	0	0	0	0	0	0	0	0	0	0	0	0	0	0	0	0	0	0	0	0	0	0	0	0	0	0	0	0	0	0	0	0	0	0	0	0	0	0	0	0	0
942	0	0	0	0	-0.00098641703739507	0	0	0	0	0	0	0	0	0	0	0	0	0	0	-0.00098641703739507	-0.00094100617797999	0	-0.00098641703739507	0	0	0	0	0	0	0	0	0	0	0	-0.00098641703739507	4.541085941508e-05	0	0	0	0	0	0	0	-0.00098641703739507	0	0	0	0	0
943	0	0	0	0	0	0	0	0	0	0	0	0	0	0	0	0	0	0	0	0	0	0	0	0	0	0	0	0	0	0	0	0	0	0	0	0	0	0	0	0	0	0	0	0	0	0	0	0	0
944	0	-0.000275518905418007	0.058203368769656	0	-0.0587544065804935	0	0	0.175161144119806	0.234466588511137	0.0584788876750755	-0.176263219741481	-0.117508813160987	0.234466588511137	0	0.117233294255569	-0.117508813160987	0.234466588511137	-0.0587544065804935	0	0.351699882766706	-0.293772032902468	0	0	0.058203368769656	-0.0587544065804935	-0.293772032902468	-0.000551037810837013	0.117233294255569	-0.0587544065804935	0.234466588511137	-0.117508813160987	-0.0587544065804935	0	0	0	0.351699882766706	-0.176263219741481	0	0	0	-0.176263219741481	-0.0587544065804935	0	-0.176263219741481	0.234466588511137	-0.059029925485912	-0.0587544065804935	0.117233294255569	0
945	0	0	0	0	0	-0.00537316640696362	0	0	0	0	0	0	0	0	0	0	0	0	0	0	0	0	0	0	0	0	0	0	0	0	0	0	0	-0.00268658320348181	0	0	0	0	0	0	0	0	0	0	0	0	0	0	0
946	0	0	0	0	0	0	0	0	0	0	0	0	0	0	0	0	0	0	0	0	0	0	0	0	0	0	0	0	0	0	0	0	0	0	0	0	0	0	0	0	0	0	0	0	0	0	0	0	0
947	0	0	0	0	0	0	0	0	0	0	0	0	0	0.460829493087558	-0.0554938956714761	0	0	0	0	0	0	0	0	0	0	0	0	0	0	0	0	0	0	0	-0.0554938956714761	0	0	0	0	0	0	0	0	0	0	0	0	0	0
948	0	0	0	0	0	0	0	0	0	0	0	0.00344566191165323	0	0	0	0	0	0	0	-0.00195641115936925	0	0	0	0	0	0	0.00251134109748269	0	0	0.00344566191165323	0	0	0.00148925075228398	0	0	-0.00195641115936925	0	-0.00391282231873851	0	0	-0.00195641115936925	0	0	0	0	-0.00586923347810776	0	0	0
949	0	0	0	0	0	0	0	0	0	0	0	0	0	0	0	0	0	0	0	0	0	0	0	0	0	0	0	0	0	0	0	0	0	0	0	0	0	0	0	0	0	0	0	0	0	0	0	0	0
950	0	0	0	0	0	-0.00258819266506199	0	0	0	0	0	0	0.00336454261680003	0	0	0	0	0	0	0	-0.0036236854266479	0	0	0	0	0	0.00595273528186202	0	0	-0.00258819266506199	0	0	0.00595273528186202	-0.00258819266506199	0	0	0	0	0	0	0	0	0	0	0	0	-0.00776457799518596	0	0
951	0	0	0	0	0	0	0	0	0	0	0	0	0	0	0	0	0	0	0	0	0	0	0	0	0	0	0	0	0	0	0	0	0	0	0	0	0	0	0	0	0	0	0	0	0	0	0	0	0
952	0	0	0	0	0	0	0	0	0	0	0	0	0	0	0	0	0	0	0	0	0	0	0	0	0	0	0	0	0	0	0	0	0	0	0	0	0	0	0	0	0	0	0	0	0	0	0	0	0
953	0	0	0	0	0	0	0	0	0	0	0	0	0	0	0	0	0	0	0	0	0	0	0	0	0	0	0	0	0	0	0	0	0	0	0	0	0	0	0	0	0	0	0	0	0	0	0	0	0
954	0	0	0	0	0	0	0	0	0	0	0	0	0	0	0	0	0	0	0	0	0	0	0	0	0	0	0	0	0	0	0	0	0	0	0	0	0	0	0	0	0	0	0	0	0	0	0	0	0
955	0	0	0	0	0	0	0	0	0	0	0	0	-0.00314568565776218	0	0	0	0	0	0	0	0	0	0	0	0	0	0	0.0179775280898876	0	0	0	0	0	0.00898876404494382	0	0	0	0	0	0	0	0	0	0	0	0	0	0	0
956	0	0	0	0	0	0	0	0	0	0	0	0	0	0	0.0630914826498423	0	0	0	0	0	0	0	0	0	0	0	0	0	0	0	0	0	0	0	0	0	0	0	0	0	0	0.00840184633592379	0	0	0	0	0	0	0
957	0	0	0	0	0	0	0	0	0	0	0	0	0	0	0	0	0	0	0	0	0	0	0	0	0	0	0	0	0	0	0	0	0	0	0	0	0	0	0	0	0	0	0	0	0	0	0	0	0
958	0	0	0	0	0	0.185549101793924	0	0	0.0101023790663094	0	-0.0627215278817228	0	0.0155241964594996	0	0	-0.0363536966358428	-0.0054218173931902	0	0	-0.0650618087182824	0	-0.0162654521795706	-0.0108436347863804	0	0	0	0	0	0	0	0.0023402808365596	0	0	0	0	-0.0054218173931902	0	0	0	0.0077620982297498	0	0	0	0	0	0	-0.111517884420435	0	0
959	0	0	0	0	0	0	0	0	0	0	0	0	0	0	0	0	0	0	0	0	0	0	0	0	0	0	0	0	0	0	0	0	0	0	0	0	0	0	0	0.00124655734002132	0	0	0	0	0	0	0	0	0
960	0	0	0.00518128202207342	0	0.00266247770174925	-0.00140307554158716	-0.0647524648397618	-0.00841845324952295	-0.00140307554158716	-0.0018677539585259	0	0	-0.0327017576007799	0.00266247770174925	0	0	0	0	0	0	0	-0.00280615108317432	0	0	-0.00420922662476148	0	0	0	0	0	-0.00140307554158716	0	0	0	0	0	0.00266247770174925	0	0	0	-0.0073027244707859	-0.00140307554158716	0	0	0	0	-0.00140307554158716	0	0
961	0	0	0	0	0.00463994060876021	0	0	0	0	-0.00168438073742189	0	0	0	0	0	0	0	0	0	0	0	0	0	-0.00336876147484377	0	0	0	0	0	0	0	0	0	0	0	0	0	0	0	0	0	0	0	0	0	0	0	0	0
962	0	0	0	0	0	0	0	0	0	0	0	0	0	0	0	0	0	0	0	0	0	0	0	0	0	0	0	0	0	0	0	0	0	0	0	0	0	0	0	0	0	0	0	0	0	0	0	0	0
963	-0.0050945030312293	0	0	0	0	0	0	0	0	0	0	0	0	0	0	0	-0.0101890060624586	0	0	0	0	0	0	0	0	0	0	0	0	0	0	0	0	0	0	0	0	0	0	0	0	0	0	0	0	0	0	0	0
964	0	0	0	0	0	0	0	0	0	0	0	0	0	0	0	0	0	0	0	0	0	0	0	0	0	0	0	0	-0.00791514959632737	0	0	0	0	-0.0158302991926547	0	0	0	0	0.0011765035284337	0	0	0	0	0	-0.00791514959632737	0	0	0	0
965	0	0	0	0	0	0	0	0	0	0	0	0	0	0	0	0	0	0	0	0	0	0	0	0	0	0	0	0	0	0	0	0	0	0	0	0	0	0	0	0	0	0	0	0	0	0	0	0	0
966	0	0	0	0	0	0	0	0	0	0	0	0	0	0	0	0	0	0	0	0	0	0	0	0	0	0	0	0	0	0	0	0	0	0	0	0	0	0	0	0	0	0	0	0	0	0	0	0	0
967	0	0	0	0	0	0	0	0	0	0	0	0	0	0	0	0	0	0	0	0	0	0	0	0	0	0	0	0	0	0	0	0	0	0	0	0	0	0	0	0	0	0	0	0	0	0	0	0	0
968	0	0	0	0	0	0	0	-0.00562208354416147	0	0	0	0	0	-0.0168662506324844	0	0	0	-0.0655059519576027	0	0	0	0	0	0	0	0	0	0	0	0	0	0	0	0	0	0	0	-0.0112441670883229	0	0	0	0	0	0	0	0	0	0	0
969	0	0	0	0	0	0	0	0	0	0	0.00194076776772891	0	0	0	-0.00111691909038109	0	0	-0.00111691909038109	0	0	0	0	0	0	0	0	0	0	0.00164769735469564	0	0	0	0	0	0	0	-0.00111691909038109	0	0	-0.00111691909038109	0	0	0	-0.00335075727114328	0.0105276875159924	0	0	0	0
970	0	0	0	0	0	0	0	-0.00170584422230562	0	0	0	0	0	0	0	0	0	0	0	0	-0.00170584422230562	0	0	0	0	0	0	0	0	-0.00113663441207797	0	0	0	0	0	0	0	0.00227505403253327	0	0	0.00284426384276093	0	0	0	0	0	0	0	0
971	0	0	0	0	0	0	0	0	-0.00176853423882286	0	0	0	0	0	0	0	0	0	0	0	0	0	0	0	0	0	0	0	0	0	0	0	0	0	0	0	0	0	0.00303076223670253	0	0	0	-0.00176853423882286	0.00303076223670253	0	0	0	-0.00353706847764573	0
972	-0.0258531540847983	-0.0517063081695967	0	0	0	-0.0258531540847983	0	0	0	0	0	0	-0.0517063081695967	0	0	-0.0258531540847983	0	-0.0517063081695967	0	0	0	0	0	0	0	0	0	0	0	-0.0258531540847983	0	0	0	0	0	0	0	0	0	0	0	-0.077559462254395	0	0	0	0	-0.0258531540847983	0	0
973	0	0	0	-0.00639488409272582	0	-0.00319744204636291	0	-0.00319744204636291	0	0	0	0	0	0	0	0	0	-0.00319744204636291	0	0.010958904109589	0	-0.00959232613908873	0	-0.00639488409272582	0	0	0	-0.00319744204636291	0	0	0	0	0	0	0	0	0	0	0	-0.00319744204636291	0	-0.00411287408429421	0.0187203661728152	0	0	0	0	-0.00319744204636291	0
974	0	0.0489476260401371	0	0	0	0	0	0	0	-0.00910912734560029	0	0	0	0	0	0	0	0	0	0	0	0.0244738130200685	0	0	0	-0.00910912734560029	0	0	0	-0.0182182546912006	0.0244738130200685	0	-0.00910912734560029	0	-0.0182182546912006	0	0	0	0.0244738130200685	0	-0.00910912734560029	-0.0182182546912006	0	0	0	0	-0.00910912734560029	0	0
975	0	0	0	0	0	0	0	0	0	0	0.0665757906215919	0	0	0	0	0	0	0	0	0	0	0	0	0	0	0	0	0	0	0	0	0	0	0	0	0	0	0	0	0	0	0	0	0	0	0	0	0	0
976	0	0	0	0	0	0	0	-0.00695216907675195	0	0	0	0	0	0	0	0	0	0	0	0	0	0	0	0	0	0	0	0	0	0	0	0	0	0	0	0	0	0	-0.00695216907675195	0	0	0	0	0	0	0	0	0	0
977	0	0	0	0	0	0	0	0	0	0	0	0	0	0	0	0	0	0	0	0	0	0	0	0	0	0	0	0	0	0	0	0	0	0	0	0	0	0	0	0	0	0	0	0	0	0	0	0	0
978	0	0	-0.0080006400512041	0	0.0575539568345324	0.0287769784172662	0	0.036650989633127	0.006387849157429	0	0	0	0	0	0	-0.589075039672238	0.0143884892086331	-0.0080006400512041	0	0	0	0	0	-0.0160012801024082	-0.0080006400512041	0	0	0	0	0	0	0	0	0	-0.0080006400512041	0	0	0	0	0	0	0	0	0	-0.080006400512041	0	0	-0.016127908937751	0
979	0.0335345405767941	-0.0464037122969838	-0.105676596314157	-0.00253648729188739	0.144470846735478	-0.00253648729188739	-0.139211136890951	-0.162412993039443	0	0.0438672250050963	-0.0696055684454756	0.00272322255263999	-0.085011227457553	-0.0232018561484919	0	0	0.0335345405767941	-0.0232018561484919	0	0	-0.0232018561484919	0	0	0	0	0	0	0	-0.0232018561484919	0	0	0	0	0	0	0	0	0	-0.0232018561484919	0	0	-0.0232018561484919	0	0	0	0	0	-0.0232018561484919	0
980	0	0	0	0	0	0	0	0	0	0	0	0	0	0	0	0	0	0	0	0	0	0	0	0	0	0	0	0	0	0	0	0	0	0	0	0	0	0	0	0	0.0325945241199478	0	0	0	0	0	0	0	0
981	0	0	0	0	0	0	0	0	0	0	0	0	0	0	0	0	0	-0.0203334688897926	0	-0.0203334688897926	0.0178794922224209	0	0	0	0	0	0	0	0	0	0	0	0	-0.0406669377795852	0	0	0	0	0	-0.0101667344448963	0	0	0	0	0	0	0	0	0
982	-0.045045045045045	0	0	-0.99080812883249	0	0	-0.135135135135135	0	0	0.27063599458728	0	0	0	0	0	0	0	0	0	0.135500859452145	0	0	0	-0.045045045045045	0	-0.135135135135135	0	-0.045045045045045	0	0	0	0	0	-0.0900900900900901	0	0	0	0	0	0	0	0	0	0	0	0	0	0	0
983	0	0	0	0	0	0	-0.0489596083231334	0	0	0	0	0	0	0	0	0	0	0	0	0	0	0	0	0	0	0	0	0	0	0	0	0	0	0	0	0	0	0	0	0	0	0	0	0	0	0	0	0	0
984	0	0	0	0	0	0	0	0	0	0	0	0	0	0	0	0	0	0	0	0	0	0	0	0	0	0	0	0	0	0	0	0.0275002291685764	0	0	0	0	0	0	0	0	0	0	0	0	0	0	0	0	0
985	0	0	0	0	-0.0133014099494546	0	0	0	0	0	0	0	0	0	0	0	0	0	0	0	0	0	0	0	0	0	0	0.0104242676951944	0	0	0	0	0	0	0	0	0	0	0	0	0	0	0	0	0	0	0	0	0
986	0	0	0	0	0	0	-0.0156290700703308	0	-0.00520969002344361	-0.0104193800468872	0	0	0	-0.00520969002344361	0	-0.00520969002344361	0	0	0	0	0	0	0	0	0	0	0	0	0	0	0	0	0	0	0	0	0	0	0	0	0	0	0	0	0	0	0	0.00956480153036825	0
987	0	0	0	-0.0107480653482373	0	0	0	0	0	0	0	-0.0107480653482373	0	0	0	0	0	0	-0.0107480653482373	0	0	0	-0.0107480653482373	0	-0.0214961306964746	0.020259319286872	0	0.0405186385737439	-0.0214961306964746	0	0	0	-0.0012368114096026	-0.0107480653482373	0	0	0	-0.0107480653482373	-0.032244196044712	0	0	0	0	0	0	0.0702892117992505	0	0	0
988	0	0	0	0	0	0	0	0	0	0	0	0	0	0	0	0	0	0	0	0	0	0	0	0	0	0	0	0	0	0	0	0	0	0	0	0	0	0	0	0	0	0	0	0	0	0	0	0	0
989	0	0	0	0	0	0	0	0	0	0	0	0	0	0	0	0	0	0	0	0	0	0	0	0	-0.00169339406973397	0	0	0	0	0	0	0	0	0	0	0	0.00130626747132743	0	0	0	0	0	0	0	0	0	0	0	0
990	0	0	0	0	0	0	0	0	0	0	0	0	0	0	0	0	0	0	0	0	0	0	0	0	0	0	0	0	0	0	0	0	0	0	0	0	0	0	0	0	0	0	0	0	0	-0.0230733733271804	0	0	0
991	0.00769822940723634	-0.00458358161067058	0	0	0	0	0	-0.00458358161067058	0.192523130414753	0.0263861161866309	0	0	0	-0.00458358161067058	0	0	0	0	0	0	0	0	0	0	0	0	0	0	0	0	0	0	0	0	0	0	0	0	0	0	0	-0.00458358161067058	0	0	-0.00458358161067058	0	0	0	0
992	-0.015416365191081	-0.680786686838124	-0.075642965204236	0	-0.151285930408472	0	0	-0.075642965204236	0	0	0	0.135869565217391	0	0	0.060226600013155	0	0	0	0	0	0	0	0	0	0	0	0	0	0	0	0	0	0	0	0	0	0	0	0	0	0	0	0	0	0	0	0	0	0
993	0.0857639562767469	-0.00788643533123028	0	0.72805202580238	0.0181823863580293	0.0391032325338895	-0.0315457413249211	-0.0236593059936909	-0.523251415282083	0.0233303618714289	-0.215565306921313	0.010295951026799	-0.0713068621033345	0	0	0	-0.337036147669595	0	-0.463770094374069	-0.0473186119873817	0	-0.250285359026062	0	-0.0630914826498423	-0.00788643533123028	0	0	-0.176240037104897	0	0	0	-0.0185113304802913	0	-0.00788643533123028	-0.0157728706624606	0	-0.181388012618297	0	-0.0236593059936909	0	0	-0.00788643533123028	0	0	-0.0157728706624606	0	-0.260581310052862	0	-0.174488409653853
994	0	0	0	0	0	0	0	0	0	0	0	0	0	0	0	0	0	0	0	0	0	0	0	0	0	0	0	0	0	0	0	0	0	0	0	0	0	0	0	0	0	0	0	0	0	0	0	0	0
995	0	0	0	0	0	0	0	0	0	0	0	0	0	0	0	0	0	0	0	0	0	0	0	0	0	0	0	0	0	0.00768285187461586	0	0	0	0	0	0	0	0	0	0	0	0	0	0	0	0	0	0	0
996	0	0	0	0	-0.0403958796202787	0	0	0	0	0	0	0	0	0	0	0	0	0	0	0	0	0	0	0	-0.0201979398101394	0	0	0	0	0	0	0	0	0	0	0	0	0	0	0	0	0	0	0	-0.0201979398101394	0	0	0	0
997	0	0	0	0	0	0	0.290631432750585	0	0	0	0	0	0	0	0	0	0	0	0	0	0	0	0	0	0	0	0	0	0	0	0	0	0	0	0	0	0	0	0	0	0	0	0	0	0	0	0	0	0
998	0	-0.00603791812583021	0	-0.104641831207948	-0.0120758362516604	-0.108682526264944	0	0	-0.00603791812583021	0	-0.0181137543774906	0	0	0	0	0	0	0	0	0	0	0	0	0	0	-0.00603791812583021	0	0	0	0	-0.0120758362516604	0	0	0	0	0	0	0	0	0	0	0	0	0	0	0.0646048719926067	-0.00603791812583021	0	0
999	0	-0.0018772292096865	0	0	0	0	0	0	0	0	0	0	0	0	0	0	0	0	0	-0.0018772292096865	0	-0.0018772292096865	0	0	0	0	0	0.00344637441411635	0	0	0	0	0	0	0	0	0	0	0	0	0	0	0	0	0	0	0	0	0
1000	0	0	0	0	0	0	0	0	0	0	0	0	0	0	0	0	0	0	0	0	0	0	0	0	0	0	0	0	0	0	0	0	0	0	0	0	0	0	0.0578703703703704	0	0	0	0	0	0	0	0	0	0
1001	0.00863902368553752	-0.00392349190779794	0	0	-0.00588523786169691	-0.0213811955254033	0	-0.00392349190779794	0	0	0	-0.0156939676311918	0	-0.00392349190779794	0	0.00215975592138438	0	0	0	0.00412150187528335	0	0	0	0	0	-0.00392349190779794	0	0	0	0	0	0	0	0	0	0	0	0	-0.0156939676311918	0	-0.00196174595389897	0	0	0	0	0	0	0	0
1002	0	-0.0144791138782307	0	0.00606008397058007	0	0	0	0.0193597248802756	0	-0.0144791138782307	0.0193597248802756	0	0	-0.00723955693911533	0.0132996409096954	0	0	0	0.0132996409096954	0	-0.00723955693911533	0	0	0.0398989227290863	0	0.0132996409096954	0	-0.021718670817346	0	0	0	0	0	0	0	0	0	0	0	0	0	0	0	0	0	0	0	0	0
1003	0	0	0	0	0	0	0	0	0	0	0	0	0	0	0	0	0	0	0	0	0	0	0	0.0150105073551486	0	0	0	0	0	0	0	0	0	0	0	0	0	0	0	0	0	0	0	0	0	0	0	0	0
1004	0	0	0	0	0	0	0	0	0	0	0	0	0	0	0	0	0	0	0	0	0	0	0	0	0	0	0	0	0	0	0	0	0	0	-0.00634276290752252	0	0	0	0	0	0	0	0	0	0	0	0	0	0
1005	0	-0.0142816338189089	0	0	0	0	-0.0285632676378178	0	-0.0142816338189089	0	-0.0285632676378178	-0.0186050552475886	0	0	0	0	0	0.0717360114777618	0.0239120038259206	0	0.0956480153036824	0	0	0	0	0	0	0	0	0	0	0	0	0	0	0	0	0	0	0	0	0	0	0	0	0	0	0	0
1006	0	0	0	0	0	0	0	0	0	0.0335683115139309	0	0	0	0	0	0	0	0	0	0	0.0671366230278617	0	0	0	-0.0089541547277937	0	0	0	0.0167841557569654	0	0	-0.0089541547277937	0	0	0	0	0.0167841557569654	0	0	0.0335683115139309	0.187920024700121	-0.0268624641833811	0	0	0	0	0.389368968644889	0.0167841557569654	0
1007	-0.0188412623645784	-0.112996896952911	0.368671546973262	0.331495794589698	0.141562853907135	-0.0565237870937353	-0.00942063118228921	-0.0188412623645784	0.018942616833697	0	0.028312570781427	-0.00942063118228921	0	0	0	0	0	-0.00942063118228921	0.0094713084168486	0.0472045103805647	0.340308298957276	0.0566758187974133	0.028312570781427	0.0566251415628539	0.189020750460496	0.047255187615124	0.028312570781427	0	0	0	0	0.0945103752302483	-0.0659444182760245	0.0095219856514078	0	0	0	0	0	0	0	0	0	0	0	0	0	0	0
1008	0	0	0	0	0	0	0	0	-0.00886210563629919	0	0	0	0	0	0	0	0	0	0	0	0	0	0	0	0	0	0	0	0	0	0	0	0	0	0	0	0	0	0	0	0	0	0	0	0	0	0	0	0
1009	-0.015531798374589	-0.0897142175196674	-0.365701896918743	0.0941265755072636	0.119211958455758	-0.0747733433031124	-0.0641758548538156	0.0598324690865576	0	0.00750492321844601	0.012508205364078	-0.205626694083559	-0.0965592443597406	-0.101493554285034	0.023105693813375	-0.342005278947333	0.174563097334381	-0.243535317672812	0.0231746660337129	-0.012301288703062	-0.0184174469444298	0.102291395104083	0.000797840819049989	-0.52129576954599	-0.105246015894257	0.066155543988935	0.51013718276367	0.055558055539638	-0.29909337321245	-0.039228416345999	0.279218189070602	-0.06476677901185	-0.127691813329258	-0.0124392331437396	-0.115843504343553	-0.133876943790958	-0.13071540633977	-0.0721337577896199	0.239398848566569	-0.113341863270738	0.209448127913121	-0.027380107360294	-0.0816183701431862	-0.0560800074773343	-0.0710208816938894	-0.0816183701431862	-0.0710208816938894	-0.149546686606225	0.00691399906041196
1010	0	0	0	0	0	0	0	0	0	0	0	0	0	0	0	0	0	0	0	0	0	0	0	0	0	0	0	0	0	0	0	0	0	0	0	0	0	0	0	0	0	0	0	0	0	0	0	0	0
1011	0	0	0	0	0	0	0	0	0	0	0	0	0	-0.00413450937155458	0	0	0.0089249324308762	0	0	0	0	0	-0.00275633958103638	-0.035832414553473	-0.00137816979051819	0	0	-0.0220507166482911	0	-0.0177522288547948	-0.00137816979051819	0	-0.00137816979051819	0	0	0	0	-0.00964718853362734	0.000163978421941761	-0.00137816979051819	0	0	-0.00413450937155458	0	0.000163978421941761	0	-0.00137816979051819	0	0
1012	0	0	0	0	0	0	0	0	0.0465332712889716	0	0.0930665425779432	0	0	0.0465332712889716	0	0	0	0	-0.0255885363357216	0	0	0	0	0	0	0	0	0	0	0	0	0	0.0930665425779432	0	-0.0511770726714432	0	0	0	-0.0255885363357216	-0.0511770726714432	0	0	0	0	0	0	0	0	0
1013	0	0	0	-0.011953143676787	0	0.0210395027259723	0	0	0	0.0540321491287316	0	0	0	0.0135080372821829	0	0.0135080372821829	0	0	0	-0.0179297155151805	0	0	0	0	-0.0059765718383935	0	0	0	0	0	0	0	0	0.0135080372821829	0	0.0436338990573405	0	0	0	0	-0.031777633486809	0.0135080372821829	0	0	0	-0.0059765718383935	0	0	0
1014	0	0	0	0	0	-0.00427222625710258	0	0	0	0	0	0	0	-0.00427222625710258	0	0	0	0	0	0	0	0	0	0	0	0	0	0	0	0	0	0	0	0	0	0	0	0	0	0	0	0	0	0	0	0	0	0	0
1015	0	0	0	0	0	0	0	0	0	0	0	0	0	0	0	0	0	0	0	0	0	0	0	0	0	0	0	0	0	0	0	0	0	0	0	0	0	-0.0065483596359112	0	0	0	0	0	0	0	0	0	0	0
1016	0	0	0	0	0	0	0	0	-0.0459558823529412	0	0	0	0	0	0	0	0	0	0	0	0	0	0	0	-0.0459558823529412	0	0	0	0	0	0	0	0	0	0	0	0	0	0	0	0	0	-0.0459558823529412	0	0	0	0	0	0
1017	0	0	0	0	0	0	0	-0.00767207805324588	0	0	0	-0.00375586854460094	0	0	0	0	0	0	0	0	0	0	0	0	0	0	-0.0112676056338028	0	0	0	0	0	0	0	0	0	0	0	0	0	0	0	0	-0.00938967136150235	0	-0.0170617494147482	-0.00187793427230047	0	0
1018	0	0	0	0	0	0	0	0	0	0	0	0	0	0	0	0	0	0	0	0	0	0	0	0	0	0	0	0	0	0	0	0	0	0	0	0	0	0	0	0	0	0	0	0	0	0	0	0	0
1019	0	0	0	0	0	0	0	0	0	0	-0.0097217502925964	0	0.051440329218107	0	0	0	0	0	0	0	0	0	0.051440329218107	-0.0203873598369011	0	0	0	0	-0.0097217502925964	0	0	0	0	0.051440329218107	0.0824932985993129	0.329973194397251	-0.0407747196738022	0.0574810284290397	0.165930456450334	0.044550156680636	0.04209612262619	-0.050496469966399	-0.0203873598369011	-0.0407747196738022	0.051440329218107	0	0	0	-0.12827047230717
1020	0	0	0	0	0	0	0	0	0	0	0	0	0	0	0	0	0	0	0	0	0.140911225927666	0	0	-0.0191204588910134	0	0	0	0	0	0	0	0	0	0	0	0	0	0	0	0	0	0	0	0	0	0	0	0	0
1021	0	0	0	0	0	0	0	0	0	0	0	0	0	0	0	0	0	0	-0.00750694392312889	-0.00375347196156445	0	0	0	0	0	0	0	0	0	0	0	0	0	0	-0.00375347196156445	0	0	0	0	0	0	0	0	0	0	0	0	0	0
1022	0	0	0	0	0	0	0	0	0	0	0	0	0	0	0	0	0	0	0	0	0	0	0	0	0	0	0	0	0	0	0	0	0	0	0	0	0	0	0	0	0	0	0	0	0	0	0	0	0
1023	-0.105615208590037	0.0504032258064516	0	0	-0.0176025347650062	0.0504032258064516	0	0	0	0.0328006910414454	0	0	0	-0.0176025347650062	0	0	0	0	-0.0176025347650062	0	0	0	0.0504032258064516	0	0	0	0	0	0	0	0	0	-0.0176025347650062	0	0	0	0	0	0	0	0	0	0	0	0	0	0	0	0
1024	0	0	0.0158881474420083	0	0	0	0	0	0	0	0	0	0	0	0	0	-0.0195503421309873	0	0	0	0	0	0	-0.00977517106549365	0	0	0	0	0	0	0	0	0	0	0	0	0	0	0	0.0158881474420083	0	0	0	0	0	0	0	0	0
1025	0	0	0	0	0	0	0	0	0	0	0	0	0	0	0	0	0	0	0	0	0	0	0	0	0	0	0	0	0	0	0	0	0	0	0	0	0	0	0	0	0	0	0	0	0	0	0	0	0
1026	0	0	0	0	0	0	-0.00830771786990114	0	0	0	0	0	0	0	0	0	0	0	0	0	0	0	0	0	0	0	0	0	0	0	0	0	0	0	0	0	0	0	0	0	0	0	0	0	0	0	0	0	0
1027	0	0	0	0	0	0	0	0.00188711290596516	0	0	0	0	0	0	0	0	0	-0.00119353106164588	0	0	0	0	0	0	0	0	0	0	0	-0.00238706212329176	0	0	0	0	0	0	0	0.00566133871789549	0	0.00158079631563126	0	0	0	-0.00238706212329176	0	-0.0004999492173266	0	-0.00119353106164588	0.00188711290596516
1028	0	0	0	0	0	0	0	0	0	0	0	0	0	0	0	0	0	0	0	0	0	0	0	0	0	0	0	0	0	0	0	0	0	0	0	0	0	0	0	0	0	0	-0.0194704049844237	0	0	0	-0.0088817449186004	0	-0.058411214953271
1029	0	0	0	0	0	0	0	0	0	0	0	0	0	-0.0441728753912145	0	0	0	0	0	0	0	0	0	0	-0.0414765657403567	0	0	0	0	0	0	0	0	0	0	0	0	0	0	0	0	0	0	0	0	0	0	0	0
1030	0	0	0	0	0	0	0	0	0	0	0	0	0	0	0	0	0	0	0	0	0	0	0	0	0	0	0	0	0	0	0	0	0	0	-0.116737520017046	0	0	0.0377236582121548	0	-0.0707558210863446	-0.0180799132164166	0.0837053571428571	-0.0361598264328331	0.0279017857142857	-0.0180799132164166	0	0.0279017857142857	1.81254661227626	0.047545530710024
1031	0	0	0	0	0	0	0	0	0	-0.00850593288818951	0	-0.0127588993322843	0	0.00781921964187974	0	0	0	0	0	0	0	0	0	0	0	0	0	0	0	0	0	0	-0.00425296644409476	0	0	0	0	0	0	0	0	-0.00425296644409476	0	-0.00425296644409476	0	0	0	0	0
1032	0	0	0	-0.016608536787909	0	0	0	0	0	0	-0.033217073575818	0	0	0	-0.0110511025939631	0	0	0	0	0	0	0	0	0	0.0590667454223272	0	0	0	-0.016608536787909	0	-0.0036837008646544	0	0	0	0	-0.016608536787909	0	0	-0.0073674017293087	0	0	0	0	0	0.227089612424637	0.0129248359232546	-0.033217073575818	0	0
1033	0	0	0	0	0	0	0	0	0	0	0	0	0	-0.0578034682080925	-0.115606936416185	0	-0.0578034682080925	0	-0.115606936416185	0.279654349564685	0	0	0	-0.0578034682080925	0	0	0	0	0	-0.0578034682080925	0	0	0	0	-0.0578034682080925	0	0	0	0	0	0	0	0	0	0	0	0	0	0
1034	0	0	0	0	0	0	0	0	0	0	0	0	0	0	0	0	-0.000867806965018701	0	0	0	0	0	0	0	0	0.0157895786752104	0	0.00153274996418888	0	0	0	0.0069988068217742	0	0	0.00240055692920758	0.00480111385841515	0	0.00240055692920758	0	0	0.0106954390883473	0.00153274996418888	-0.0044855476893174	0	-0.000867806965018701	0	-0.0026034208950561	0	0
1035	-0.00374027528426092	0	0	0	0	0	0	0	0	0	0	0	0	0	0	0	0	0	0	0	0	0	0	0	0	0	0	0	0	0	0	0	0	0	0	0	0	0	0	0	0	0	0	0	0	0	0	0	0
1036	0	0	0	0	0	0	0	0	0	0	0	0	0	0	0	0	0	0	0	0	0	0	0	0	0	0	0	0	0	0	0	0	0	0	0	0	0	0	0	0	0	0	0	0	0	0	0	0	0
1037	0	0	0	0	-0.0120641814452889	0	0	0	0	-0.0120641814452889	0	0	0	0	0	0	0	0	-0.0120641814452889	0	0	0	0	0.0267094017094017	-0.0241283628905779	0	0	0	0	0	0.0267094017094017	0	0	0	0	0	0	0	0	0	0	0	0	0	0	0	0	0	0
1038	0	0	0	0	0	0	0	0	0	0	0	0	0	0	0	0	0	0	0	0	0	0	0	0	0	0	0	0	0	0	0	0	0	0	0	0	0	0	0	0	0	0	0	0	0	0	0	0	0
1039	0	0	0	0	0	0	0	0	0.0461467466543609	0	0	0	0	0	0	0	0	0	0	0	0	0	0	0	0	0	0	0	0	0	0	0	0	0	0.138440239963083	0	0	0	0	0	0	0	0	0	0	0	0	0	0
1040	0	0	0	0	0	0	0	0	0	0	0	0	0	0	0	0	0	0	0	0	0	0	0	0	0	0	0	0	0	0	0	0	0	0	0	0	0	0	0	0	0	0	0	0	0	0	0	0	0
1041	0	0.00389802759803539	-0.00419392719342392	-0.00209696359671196	0	0	0	0	0	0	0	0	0	0	-0.00209696359671196	0	0	0	0	-0.00209696359671196	0	-0.00209696359671196	0	0	0	-0.00209696359671196	0	0	0	0	0	0	0	0	0	0	0	0	0	0	0	0	-0.00209696359671196	0	-0.00209696359671196	0	0	0	0
1042	0	0	0	0	0	0	0	0	0	0	0	0	0	0	0	0	0	0	0	0	-0.0482625482625483	0	0	0	0	0	0	0	0	0	0	0	0	0	0	0	0	0	0	0	0	0	0	0	0	0	0	0	0
1043	0	0	0.0019010007329227	0	-0.0049253067033483	-0.00357980275286832	-0.0420071326679585	0	0.00369090210935686	-0.00978890789214359	-0.0238859201906398	0	0.00822120522868653	0	0	-0.00704850614924808	0	0	0.024268612102041	-0.00715960550573663	0	-0.0654486554326439	0	0	0	0	0	0	0	-0.00357980275286832	0	0	0	0	0	-0.00262930238640697	-0.00178990137643416	0	0	-0.00715960550573663	0	0	-0.00178990137643416	0	-0.00178990137643416	-0.0412294371725387	-0.00178990137643416	0.00274040174289551	0
1044	0	0	0	0	0	0	0	0	0	0	0	0	0	0	0	0	0	0	0	0	0	0	0	0	0	0	0	0	0	0	0	0	0	0	0	0	0	0	0	0	0	0	0	0	0	0	0	0	0
1045	-0.203721081486245	0	0	0	0	0	0.11454753722795	0	0	-0.063653723742839	0	0	0.11454753722795	0	0	0	0	0	0	0	0	0	0	0	0	0	0	0	0	0	-0.063653723742839	0	0	0	0	0	-0.063653723742839	0	0	0	0	0	0	0	0	0	0	0	0
1046	0	0	0	0	0	0	0	0	0	0	0	0	0	-0.00333222259246918	0	0	0	0	0	0	0	0	0	0	0	0	0	0	0	0	0	0	0	0	0	0	0	0	0	0	0	-0.00999666777740753	0	0	0	0	0	0	0
1047	-0.00375699740767179	0	0	0	0	0	0	-0.00751399481534358	0	0	0	0	0	0	0	0	0	0	0	0	0	0	0	0	0	0	0	0	0	0	0	0	0	0	0	0	0	0	0	0	0	0	0	0	0	0	0	0	0
1048	-0.0243427458617332	0	0	0	-0.0365141187925998	0	0	0	0	0	0	-0.0121713729308666	0	-0.0121713729308666	0	0	-0.0243427458617332	0	0	0	-0.0121713729308666	0	0.0196808328343826	0	0	0.0318522057652492	0	0	0	-0.0121713729308666	0	0	0	-0.0907687066190089	0	0	0	0	0	0	0	0.0112641898552741	0	0	0	-0.0046619130273506	-0.0121713729308666	0	0
1049	0	0	0	0	0	0	0	0	0	0	0	0	0	0	0	0	0	0	0	0	0	0	0	0	0	0	0	0	0	0	0	0	0	0	0	0	0	0.105103975012292	0	0	0	0	0.0137254869878866	0	0	0	0	0	0
1050	0.191754554170662	0	0	0	0	-0.0542740841248304	0	0	0	0	0	-0.0271370420624152	0	0	0	0	0	0	0	0	0	0	0	0	0	-0.0542740841248304	0	0	0	0	0	0	0	0	0	0	0	0	0	0	0	0	0	0	0	0	0	0	0
1051	0	0	0	0	0	0	0	0	0	0	0	0	0	0	0	0	0	0	0	0	0	0	0	0	0	0	0	0	0	0	0	0	0	0	0	0	0	0	0	0	0	0	0	0	0	0	0	0	0
1052	0	0	0	0	0	0	0	0	0	0	0	0	0	0	0	0	0	0	0	0	0	-0.0352733686067019	0	0	0	0	0	0	0	0	0	0	0	0	-0.0352733686067019	0	0	0	0	-0.0352733686067019	0	0	0	0	0	0	0	0	0
1053	0	0	0	-0.011768859597505	0	0	0	0	0	0.0413992962119644	0	0	0	-0.011768859597505	0	0	0	0	0	0	0	0	0	0.0413992962119644	0	0	0	0	0	0	0	0	0	0	0	0	0	0	0	0	0	0	0	-0.035306578792515	0	0	0	-0.011768859597505	0
1054	0	0	0	0	0	0	0	0	0	0	0	-0.0262398320650748	0	0	0	0	0	0	0	0	0	0	0	0	0	0	0	0.121760635343381	0	0	0	0	-0.0262398320650748	0	0	0	0	0	0	0	0	0	0	0	0	0	-0.0787194961952244	0	0
1055	0	0	0	0	0	0	0	0	0	0	0	0	0	0	0	0	0	0	0	0	0	0	0	0	0	0	0	0	0	0	0	0	0	0	0	0	0	0	0	0	0	0	0	0	0	0	0	0	0
1056	0	0	0	0	0	0	0	0	0	0	0	0	0	0	0	0	0	0	0	0	0	0	0	0	0	0	0	0	0	0	0	0	0	0	0	0	0	0	0	0	0	0	0	0	0	0	0	0	0
1057	0	0	0	0	0	0	0	0	0	0	0	0	0	0	0	0	0	0	0	0	0	0	0	0	0	0	0	0	0	0	0	0	0	0	0	0	0	0	0	0	0	0	0	0	0	0	0	0	0
1058	0	0	0	0	0	0	0	0	0	0	0	0	0	0	0	0	0	0	0	0	0	0	0	0	0	0	0	0	0	0	0	0	0	0	0	0	0	0	0	0	0	0	0	0	0	0	0	0	-0.0143051283885273
1059	0	0	-0.0172176308539945	0	0	0	0	0	0	0	0	0	0	0	0	0	0	0	0	0	0	0	0	0	0	0	0	0	0	0	0	-0.0172176308539945	0	0	0	0	0	0	0.0351246926589392	0	0	0	-0.0172176308539945	0	0	0	0	0	0
1060	0	0	0	0	-0.00830771786990114	0	0	0	0	0	0	0	0	0	0	0	0	0	0	0	0	0	-0.00830771786990114	0	0	0	0	0	0	0	0	0	0	0	0	0	0	0.0179985601151908	0	0	0	0	0	0	0	0	0	0	0
1061	0	0	0	0	0	0	0	0.00750694392312889	0	0	0.00145857810040553	0	0	0	0	0	0	0	0	0	0	0	0	0	0	0	0	0	0	0	0	0	0	0	0	0	0	0	0	0	-0.00229489386115892	0	0	0	0.00750694392312889	0	0	0	0
1062	0	0	0	0	0	0	0	0	0	0	0	0	0	0	0	0	0	0	0	0	0	0	0	0	0	0	0	0	0	0	0	0	0	0	0	0	0	0	0	0	0	0	0	0	0	0	0	0	0
1063	0	0	0	0	0	0	0	0	-0.000613071919466873	0	0	0	0	0	0	0	0	0	0	0	0	0	0	0	0	0	0	0	0	0	0	0	0	0	0	0	0	-0.000306535959733436	0	0	0	0	0	0	0	0	0	0	0
1064	0	0	0	0	0	0	0	0	0	0	0	0	0	0	0	0	0	0	0	0	0	0.0281815106659019	0.0188359389715577	-0.00949036727721363	0	0	0	0	0	0	0	0	0	-0.00949036727721363	-0.0189807345544273	0	0	0	0	0	0	0	0.0188359389715577	0	0	0	0	0	0
1065	0	0	0	0	0	0	0	0	0	0	0	0	0	0	0	0	0	0	0	0	0	0	0	0	0	0	0	0	0	0	0	0	0	0	0	0	0	0	0	0	0	0	0	0	0	0	0	0	0
1066	0	0	0	0	0	0	0	0	0	0	0	0	0	0	0	0	0	0	0	0	0	0	0	0	0	0	0	0	0	0	0	0	0	0	0	0	0	0	0	0	0	0	0	0	-0.0020416506891159	0	0.0409668168783286	0	0
1067	0	0	0	0	0	0	0	0	0	0	0	0	0	0	0	0	0	0	0	0	0	0	0	0	0	0	0	0	0	0	0	0	0	0	0	0	0	0	0	0	0	0	0	0	0	0	0	0	0
1068	0	0	0	0.0612871957619937	0	-0.00201546469341775	0	0.0144286263947672	0	0.0243072482395299	0	0	0.245927395792728	-0.0156654783434314	-0.00227500227500228	0	0.00480954213158907	-0.0113750113750114	0.00480954213158907	0.00961908426317815	0	-0.0401105922460289	-0.00201546469341775	0	-0.0608451503026342	-0.00455000455000455	-0.0336059589618651	0	0	-0.00201546469341775	0	0	-0.00682500682500682	0	0	-0.0429655056434587	0	0.00961908426317815	0	0	-0.00682500682500682	-0.00227500227500228	0	0	0	0	0	0	0
1069	0	0	0	0	0	0	0	0	0	0	0	0	0	0	0	0	0	0	0	0	0	0	0	0	0	0	0	0	0	0	0	0	0	0	0	0	0	0	0	0	0	0	0	0	0	0	0	0	0
1070	0	0	0	0	0	0	0	0	0	0	0	0	0	0	0	0.00521893429361724	0	0	0	0	0	0	0	0	0	0	0	0	0	0	0	0	0	0	0	0	0	0	0	0	0	0	0	0	0	0	0	0	0
1071	0	0	0	0	0	-0.00791389680278569	0.0252620942276115	0	-0.0158277936055714	0	0	0	0	-0.00791389680278569	0	0	0	0	0	-0.0237416904083571	0	0	0	0	-0.0158277936055714	0	0	0	0	0	-0.00791389680278569	0	0.0126310471138057	0.0378931413414172	0.0252620942276115	0.0126310471138057	0	-0.0237416904083571	-0.0158277936055714	0	0	0	0	0	-0.0158277936055714	0	0.0126310471138057	0	0
1072	0	0	0	0	0	0	0	0	0	0	0	0	0	0	0	0	0	0	0	0	0	0	0	0	0	0	0	0	0	0	0	0	0	0	0	0	0	0	0	0	0	0	0	0	0	0	0	0	0
1073	0	0	0	0	0	0	0	0	0	0	0	0	0	0	0	0	0	0	0	0	0	0	0	0	0	0	0	0	0	0	0	0	0	-0.00485271994953171	0	0	0	0	0	0	0	0	0	0	0	-0.00970543989906343	0	0	0
1074	0	0	0	0	0	0.00783760482796457	0	0	0	0	0	0	0	0	0	0	0	0	0	0	0	0	0	0	0	0	0.0017582936445172	0	0	0	0	0	0	0	0	0	0	0	0.00783760482796457	0	0	0.0235128144838937	0	0	0	0	0.0235128144838937	0	0
1075	-0.000569265363049	0	0.100617652918908	0.0453514739229025	0	0	0.199527509748669	0	0	0	0	0.0226757369614512	-0.10047533657814	-0.0470592700120495	-0.256833556295601	-0.0116225011622501	-0.013899562614446	0	0	-0.0813575081357508	0	-0.0232450023245002	-0.313807531380753	0	0	0	0	0.0226757369614512	0	0	0	0	-0.0116225011622501	0	0	0	0	0	0	0	0	0	0	0	0	0	0	-0.0116225011622501	0
1076	-0.000327204787660453	0	0	0	0	0	0	0	0	0	0	0	0	0	0	0	0	0	0	0	0	0	0	0	0	0	0	0	0	0	0	0	0	0	0	0	0	0	0	0	0	0	0	0	0	0	0	0	0
1077	0	0	0	0	0	0	0	0	0	0	0	0.0076728305071741	0	0	0	0	0	0	0	0	0	0	0	0	0	-0.00376095377787807	0	0	0	0	0	0.0076728305071741	0	0.00015092295141796	0	0	0.0076728305071741	0	-0.00376095377787807	0	0	0	0	-0.00752190755575614	0.0076728305071741	0	0	0	-0.00376095377787807
1078	0	-0.0154886674583097	0	0	0	-0.00516288915276989	0	0	-0.00516288915276989	0.00634477507772349	0	0	0	0	-0.0206515566110796	0	0	0	0	0	0	0	0	0	0.012689550155447	0.000746540471998198	0	0	0	-0.000870690905910902	0	0	-0.00914389238058621	0	0	-0.00516288915276989	-0.0302307944446212	0	0.00634477507772349	-0.036699719956258	0	-0.00516288915276989	0	0.00752666100267711	0	0	0	-0.00914389238058621	-0.0103257783055398
1079	0.140498770635757	0.0685958506873734	0	0	0	0.0351246926589392	-0.0183891136447223	0	0.0351246926589392	0	-0.0735564545788893	-0.0183891136447223	0	0.0167355790142169	0	-0.147112909157779	0	-0.0183891136447223	0	0	0	-0.0183891136447223	0	0	0	0	0.0518602716731562	0	0	-0.0183891136447223	0	0	0	0.0334711580284339	-0.078517058470405	-0.0183891136447223	-0.055167340934167	0	0	-0.0367782272894446	0	-0.0183891136447223	0	0	-0.055167340934167	0	0.0351246926589392	0	0
1080	0	0	0	0	0	0	0	0	0	0	0	0	0	0	0	0	0	0	0	0	0	0	0	0	0	0	0	0	0	0	0	0	0	0	0	0	0	0	0	0	0	0	0	0	0	0	0	0	0
1081	0	0	0	0	0	0	0	0	0	0	0	0	0	0	0	0	0	0	0	0	0	0	0	0	0	0	0	0	0	0	0	0	0	0	0	0	0	0	0	0	0	0	0	0	0	0	0	0	0
1082	0	0	0	0	0	0	0	0	0	0	0	0	0	0	0	0	0	0	0	0	0	0	0	0	0	0	0	0	0	0	0	0	0	0	0	0	0	0	0	0	0	0	0	0	0	0	0	0	0
1083	0	0	-0.000495670319756923	0.00101816404659119	0	0	0	0	0	0	0	0	0	0.00101816404659119	0	0	0	0	0	-0.000495670319756923	0	0	-0.000495670319756923	0.00101816404659119	0	-0.000495670319756923	0	0	0.00101816404659119	0	0	0	0.00154065777342545	0	-0.000991340639513846	0.00203632809318237	0	0	0	0.00407265618636475	-0.000495670319756923	0	0	0	0	-0.000495670319756923	0	0	0
1084	0	0	0	0	0	0	0	0	0	0	0	0	0	0	0	0	0	0	0	0	0	0	0	0	0	0	0	0	0	0	0	0	0	0	0	0	0	0	0	0	0	0	0	0	0	0	0	0	0
1085	0	0	0	0	0	0.0121432908318154	0.0364298724954463	0	0	0	0	0	-0.0003786225165442	0	0	0.0176470024729069	0	0	0.0364298724954463	0	0	-0.0250438266967193	0	0	-0.00626095667417982	0	0	0	0	0	-0.0125219133483596	-0.00626095667417982	0	0	0	0	0	0	0	0.0051250891245472	0	0	0	0	0	0	0	0	0
1086	0	0	0	0	0	0	0	0	0	0	0	0	0	0	0	0	0	0	0	0	0	0	0	0	0	0	0	0	0	0	0	0	0	0	0	0	0	0	0	0	0	0	0	0	0	0	0	0	0
1087	-0.00302288322602098	0	0	0	0	0	0	0	0	0	0	0	0	0	0	0	0	0	0	0	0	0	0	0	0	0	0	0	0	0	0	0	0	0	0	0	0	0	0	0	0	0	-0.00302288322602098	0	0	0	0	0	0
1088	0	0	0	0	0	0	0	0	0	0	0	0	0	0	0	0	0	0	0	0	0	0	0	0	0	0	0	0	0	0	0	0	0	0	0	0	0	0	0	0	0	0	0	0	0	0	0	0	0
1089	0	0	0	0	0	0	0	0	0	0	0	0	0	0	0	0	0	0	0	0	0	0	0	0	0	0	0	0	0	0	0	0	0	0	0	0	0	0	0	0	0	0	0	0	0	0	0	0	0
1090	0	0	0	0	0	0	0	0	0	0	0	0	0	0	0	0	0	0	0	0	0	0	0	0	0	0	0	0	0	0	0	0	0	0	0	0	0.00432479186939129	0	0	0	0	0	0	0	0	0	0	0	0
1091	0	0	0	0	0	0	0	0	0	0	0	0	0	0	0	0	0	0	0	0	0	0	0	0	0	0	0	0	0	0	0	0	0	-0.00337091908108746	0	0.0583834238102283	0.0015433674266191	0.0268056147082232	0	0	0	0	0	0	0	0	0	0	0
1092	0	0	0	-0.00400256163944925	0.0216731686172518	0.00722438953908395	0	0.0032218278996347	0	0	0.0064436557992694	0	0	0	0	0	0	0	0	0	-0.00400256163944925	0	-0.00078073373981455	0	0	0	0	0.00722438953908395	0	0	0	0.0064436557992694	0	0.00722438953908395	0	0	0	0	0	0	0	0	0	0	0	0	0	0	0
1093	0	0	0	0	0	0	0	0	-0.00805152979066022	0	0	0	0	0	0	0	0	0	0	0	0	0	0	0	0	0	0	0	0	0	0	0	0	0	0	0	0	0	0	0	0	0	0	0	0	0	0	0	0
1094	0	0	0	0	0	0	0	0	0	0	0	0	0	0	0	0	0	0	0	0	0	0	0	0	0	0	0	0	0	0	0	0	0	0	0	0	0	0	0	0	0	0	0	0	0	0	0	0	0
1095	0	0	0	0	0	0	0	0	0	0	0	0	0	0	0	0	0	0	0	0	0	0	0	0	0	0	0	0	0	0	0	0	0	0	0	0	0	0	0.00388446666035989	0	0	0	0	0	0	0	-0.00455933980759586	0	0
1096	0	0	0	0	0	0	0	-0.00329511005667589	0	0	0	0	0.0581928997814057	0	0	0.0080409059919621	0	0	0	0	-0.00329511005667589	0	-0.00329511005667589	0.0311066763886933	0	0	0	0.0139057831660087	0	0	0	0	-0.00988533017002768	0	0	0	0	0	0	-0.0230657703967313	0	-0.00659022011335179	0.00695289158300441	-0.186370587351916	-0.00329511005667589	-0.00988533017002768	-0.00329511005667589	0	0
1097	-0.0592417061611374	0	0	0	0	0	0	0	0	0	0	0	0	0	0	0	0	0	0	0	0	0	0	0	0	0	0	0.127226463104326	0	0	0	0	0	0	0	0	0	0	0.636132315521629	0	0	0	0	0	0	0	0	0	0
1098	0	0	0	0	0	0	0	0	0	0	-0.00157304431265829	0	0	0	0	0	0	0	0	0	0	0	0	0	0	0	0	0	0	0	0	0	0	0	0.00248818113958696	0	0	0	0	0	0	0	0	0	0	0	0	0	0
1099	-0.00640204865556978	-0.0128040973111396	0	0	0	0	0	0	0	0	0	0	0.0104493207941484	0	0	0	0	-0.00640204865556978	0	0	0	0	0	0	0	0	-0.0128040973111396	0	0	0	0	-0.00640204865556978	0	0	0	0	0	0	0	0	0	0	0.0104493207941484	0	0	0	0	0.0208986415882968	0
1100	0	0	0	0	0	0	0	0.100603621730382	0	0	0	0	0	0	0	0	0	0	0	0	0	0	0	0	0.231954071617972	0	0	0	0	-0.174641983932937	0	0	0	-0.069856793573175	0	0	0	0	-0.0349283967865875	-0.039109965415968	0	0	0	0	0	0	0	0	0
1101	0	0	0	0	0	0	0	0	0	0	0	0	0	0	0	0	0	0	0	0	0	-0.008911067545892	0	0	0	0	0.0183385292499542	0	0	0	0	0	0	0	0	0	0	0	0	0	0	0	0	0	0	0	0	0	0
1102	0	0	0	0	0	0	0	0	0	0	0	0	0	0	0	0	0	0	0	0	0	0	0	0	0	0	0	0	0	0	0	0	0	0	0	0	0	0	0	0	0	0	0	0	0	0	0	0	0
1103	0	0	0	0	0	0	0	0	0	0	0	0	0	0	0	0	0	0	0	0	0	0	0	0	0	0	0	0	0	0	0	0	0	0	0	0	0	0	0	0	0	0	0	0	0	0	0	0	0
1104	0	0	0	0	0	0	0	0	0	0	0	0	0	0	0	0	0	0	-0.24896265560166	0	-0.21740267024093	0	0	0	0	0	0	-0.0829875518672199	0	0	0	0	0	0	0.229095074455899	-0.39972812783695	0	0	0	0	-0.24896265560166	0	0	0.11454753722795	0	0	0	0	0
1105	0	0.00668404518414544	0	0	0	0	0	0	0	0	0	0	0	0	0	0	0	0	0	0	0.00668404518414544	0	0	0	0	0	0	0	0	-0.0033526670466356	0	0	0	0	-0.0033526670466356	0	0	0	0	0	-0.0067053340932712	0	0	0	0	0	0	0.00668404518414544	0
1106	0	0	0	0	0	0	0	0	0	0	0	0	0	0	0	0	0	-0.00236694793898008	0	0	0	0	0	0	0	0	0	0	0	0	0	0	0	0	0	0	0	0	0	0	0	0	0	0	0	0	0	0	0
1107	0	0	0	0	0	0	0	0	0	0	0	0	0	0	0	0	0	0	0	0	0	0	0	0	0	0	0	0	0	0	0	0	0	0	0	0	0.0291036088474971	0	0	0	0	0	0	0	0	0	0	0	0
1108	0	0	0	0	0	0	0	0	0	0	0	0	0	0	0	0	0	0	0	0	0	0	0	0	0	0	0	0	0	0	0	0	0	0	0	0	0	0	0	0	0	0	0	0	0	0	0	0	0
1109	0	0	0	0	0	0	0	0	0	0	0	0	0	0	0	0	0	0	0	0	0	0.0261118476731859	0	0	0	0	0	0	0	0	0	0	0	0	0	0	0	0	0	0	0	0	0	0	0	0	0	0	0
1110	0	0	0	0	0	0	0	0	0	0	0	0	0	0	0	0	0	-0.00537880214076325	0	0	0.00308160539314561	0	0	0	-0.00498659781799926	0	0	0	0	0	0	0	0	0	0	0	0	0	0	0	0	0	0	0	0	0	0	0	0
1111	0	0	0	0	0	0	0	0	0	0	0	0	0	0	0	0	0	0	0	0	0	0	0	0	0	0	0	0	0	0	0	0	0	0	0	0	0	0	0	0	0	0	0	0	0	0	0	0	0
1112	0	0	0	0	0	0	0	0	0	0	0	0	0	0	0	0	0	0	0	-0.00587924040214004	0	0.00828843762950684	0	0	0	0	0	0	0	0	0	0	0	0	0	0	0	0	0	-0.00881886060321006	0	0	0	0	-0.00293962020107002	0	-0.00293962020107002	0	0
1113	0	0	0	0	0	0	0	0	0	0	0	0	0	0	-0.0156298843388559	0	0	-0.0312597686777118	0	0	0	0	0	0	0	0	0	0	0	0	0	0	0	0	0	0	0	0	0	0	0	0	0	0	0	0	0	0	0
1114	0	0	0	0	0	0	0	0	0	0	0	0	0	0	-0.00456808734182998	0	0	0	0	0	0	0	0	0	0	0	0	0	0	0	0	0	0	0	0	0	-0.00913617468365995	0	0	0	-0.00456808734182998	0	0	0	0	0	0	0	0
1115	0	0	0	0	0	0	0	0	0	0	0	0	0	0	0	-0.0346981263011797	0	0	0	0	0	0	0	0	0	0	0	0	0	0	0	-0.00867453157529493	0	-0.00867453157529493	0	0.018254837531946	0	-0.0173490631505899	0.0168265010075	-0.0260235947258848	-0.0164432887692337	-0.0173490631505899	0.0018115487627122	0.046089981020543	-0.0173490631505899	0	0	-0.00867453157529493	0.018254837531946
1116	0	0	0	0	0	0	0	0	0	0	0	0	0	0	0	0	0	0	0	0	0	0	0	0	0	0	0	0	0	0	0	0	0	0	0	0	0	0	0	0	0	0	0	0	0	0	0	0	0
1117	0	0	0	0	0	0	0	0	0	0	0	0	0	0	0	0	0	0	0	0	0	0	0	0	0	0	0	0	0	0	0	0	0	0	0	0	0	0	0	0.222222222222222	0.57088122605364	0	0	0	0	0.222222222222222	0	0	0.126436781609195
1118	0	0	0	0	0.00303143272693394	0	-0.00749737591842855	0	0.00303143272693394	-0.00749737591842855	0	0	0	0	-0.00749737591842855	-0.00374868795921427	-0.00749737591842855	0	0	0	0	0	-0.0112460638776428	0	-0.0149947518368571	0	0	-0.00071725523228034	0	0.0196231068261644	0	0.0196231068261644	0	-0.00821463115070889	0	0.00303143272693394	0	-0.00374868795921427	0	-0.00374868795921427	-0.0201779502606321	-0.00374868795921427	-0.0194606950283517	0	0.00678012068614821	0	-0.00374868795921427	-0.0112460638776428	0
1119	0	0	0	0	0	0	0	0	0	0	0	0	0	0	0	0	-0.00924385283786282	0	0	-0.00924385283786282	0	0	0	0	0	0	0	0	0	0	0	-0.0063958072476724	0	0	0	0	-0.00924385283786282	0	0	0	-0.00924385283786282	-0.0184877056757256	-0.00924385283786282	0	0	0.0120918984280532	0	-0.0063958072476724	0
1120	0	0	0	0	0	0	0	0	0	0	0	0	0	0	0	0	0	0	0	0	0	0	0	0	0	0	0	0	0	0	0	0	0	0	0	0	0	0	0	0	0	0	0	0	0	0	0	0	0
1121	0	-0.00110348480501424	0	0	0	0	0	0	0	0	0	0	0	0	0	-0.00110348480501424	0	0	0	0	0	0	0	0	0	0	0	0	0	0	0	0	0	0	0	0	0	0	0	0	0	0	0	0	0	0	0	0	0
1122	0	0	0	0	0	0	0	0	0	0	0	0	0	0	0	0	0	0	0	0	0	0	0	0	0	0	0	0	0	0	0	0	0	0	0	0	0	0	0	0	0	0	0	0	0	0	0	0	0
1123	0	0	0	0	0	0	0	0	-0.00349027957139367	0	0	0	0	0	0	0	0	0	0	0	0	0	0	0	0	0	0	0	0	0	-0.00349027957139367	0	0	0	0	0	0	0	0	0	0	0	0	0	0	0	0	0	0
1124	0	0	0	0	0	0	0	0	0	0	0	0	0	0	0	0	0	0	0	0	0	0	0	0	0	0	0	0	0	0	0	0	0	0.0269323996768112	0	0	0	0	0	0	0	0	0	0	0	0	0	0	0
1125	-0.0156445556946183	0	-0.0156445556946183	-0.0149949893451132	0	0	0	0	-0.0156445556946183	0	0	0	0	0	0	0	0	-0.0156445556946183	0	0	0	0.0169436883936284	0	0	-0.0625782227784731	0.0319386777387416	0	-0.0156445556946183	0.0319386777387416	0	0	0.0169436883936284	0.0319386777387416	0	-0.0156445556946183	0.0645269218269884	-0.0156445556946183	0	-0.0312891113892365	0	-0.0149949893451132	0.00194869904851529	-0.0782227784730914	0.0319386777387416	0	-0.0156445556946183	0	-0.0156445556946183	0.0332378104377518
1126	0	0	0	0	0.0241196333815726	0	0	0	-0.01404099971918	0	0	0	0	-0.04212299915754	0	0	0	0	0	-0.01404099971918	0	0	0	0	-0.01404099971918	0	0	0	0	0	0	0	-0.0937150371995001	0	-0.0860544628230496	0	-0.16849199663016	-0.02808199943836	0	-0.023774196340724	0	0	0.069432845210475	0	0	-0.12817746198059	0	0	0
1127	0	0	0	0	0	0	0	0	0	0	0	0	-0.0269396551724138	0	0	0	0	0	0	0	0	0	0	0	0	0	0	0	0	0	0	0	-0.0269396551724138	0	-0.0538793103448276	0	0	0	0	0.0437254044599913	0	0	-0.0269396551724138	0	0	0	0	0	0
1128	0.0021652872920501	0	0.0021652872920501	-0.08110300081103	0.79980515878831	0.0021652872920501	1.41890410133129	-0.0789377135189799	0.280118886397942	0.0854335753951303	0	0.243897960576528	0.175197725374361	0	0	0	0.132480937676796	0.0427167876975651	0	-0.040551500405515	0.0427167876975651	0	0	0	0	-0.040551500405515	0	0	0	0	0	0	-0.040551500405515	-0.018898627485014	0	-0.719100570839019	0	-0.040551500405515	0	-2.26321024454582	-0.364963503649635	-27.3059356933926	-0.48445271757413	-0.040551500405515	0	-0.040551500405515	0	0	0
1129	0	0	0	0	0	0	0	0	0	0	0	0	-0.00516288915276989	0	0	0	0	0	0	0	0	0	0	0	0	0	0	0	0	0	0	0	-0.00516288915276989	0	0	0	0	0.0422356750668732	0	0	0	0	0	0	0	0	0	0	0
1130	0	0	0	-0.0582920431361119	0	0	-0.0582920431361119	0	0	0.0554871377732021	0	-0.0874380647041679	0	0	-0.0213006179539772	0	0	0	0	0	0	0	0	0.00223559288825897	0	0	0	0.0476417341591234	0	0	0	0	0	0	0	0	0	0	0	0	0	0.0952834683182468	0	0	0	0	0	0	0.0184957125910674
1131	0	0	0	0	0	0	0	0	0	0	0	0	0	0	0	0	0	0	0	0	0	0	0	0	0	0	0	0	0	0	0	0	0	0	-0.0117439812096301	0	0	0	0	0	0	0	0	0	0	0	0	0	0
1132	0	0	0	0	0	0	0	0	0	0	0	0	0	0	0	0	0	0	0	0	0	0	0	0	0	0	0	0	0	0	0	0	0	0	0	0	0	0	0	0	0	0	0	0	0	0	0	0	0
1133	0	0	0	0	0	0	0	0	0	0	0	0	0	0	0	0	0	0	0	0	0	0	0	0	0	0	0	0	0	0	0	0	0	0	0	0	0	0	0	0	0	0	0	0	0	0	0	0	0
1134	0	0	0	0	0	0	0	0	0	0	0	0	0	0	0	0	0	0	0.0047948982282851	0	0	0	0	0	0	0	0	0	0	0	0	0	0	0	0	0	0	0	0	0	0	0	0	0	0	0	0.0047948982282851	0	0
1135	0	0	0	0	0	0	-0.00165880118438405	0	0	0	0.00299987326744526	0.0015528914839431	0	0.00465867445182931	0	0	-0.000829400592192023	0	0	0	0.0015528914839431	0	0.00465867445182931	0.00227638237569418	-0.00165880118438405	0	0	0	0	0	0	-0.00165880118438405	0	0	0	0	0	0	0	0	0.00465867445182931	0	0	0	0	0.0015528914839431	-0.00248820177657607	0	0
1136	0	0	0	0	0	0	0	0	0	0	0	0	0	0	0	0	0	0	0	0	0	0	0	0	0	0	0	0	0	0	0	0	0	0	0	0	0	0	0	0	0	0	0	0	0	0	0	0	0.166164528755393
1137	0	0	0	0	0	0	0	0	0	0	0	0	0	0	0	0	0	0	0	0	0	0	0	0	0	0	0	0	0	0	0	0	0	0	0	0	0	0	0	0	0	0	0	0	0	0	0	0	0
1138	0	0	0	0	0	0.0119703136222169	0	0.0239406272444338	0	0	0	0	0.001070415694977	0	0	0	0	0	0	-0.028587764436821	0	0	0	0	0.0119703136222169	-0.0171526586620926	0	0	0	0	-0.00571755288736421	0	-0.00571755288736421	0	0	-0.00571755288736421	0	0	0	0	0	0	0	-0.00571755288736421	0	0	0	0	0
1139	0	0	0	0	0	0.617772108843537	0	0	0	0	0	0	0	0	0	0	0	0	0	0	0	0	0	0	0	0	0	0	0	0	0	0	0	0	0	0	0	0	-0.0625	0	0	0	0	0	0	0	0	0	-0.0625
1140	0	-0.010612331529237	0	0	-0.0212246630584739	0	0	0.020571898786258	0	0	0	-0.010612331529237	0	0	0	0	0	0	0	-0.0424493261169479	0	0	-0.0318369945877109	0	0	0	0	0	0	0	0	0	0	0	0	0	0	0	0	0	0	0	0	0	0	0	0	0	0
1141	0	0	0	0	0	0	0	0	0	0	0	0	0	0	0	0	-0.0386922035209905	0	0	0	0	0	0	0	0	0	0	0	0	0	0	0	0	0	0	0	0	0	0	0	0	0	0	-0.0386922035209905	0	0	0	0	0
1142	0	0	0	0	0	0	0	0	0	0	0	0	0	0	0	0	0	0	0	0	0	0	0	0	0	0	0	0	0	0	0	0	0	0	0	0	0	0	0	0	0	0	0	0	0	0	0	0	0
1143	0	0	0	0	0	0	0	0	0	0	0	0	0	0	0	0	0	0	0	-0.00539316147125445	0	0	0	0	0	0	0	0	0	0	0	0	0	0	0	0	0	0	0	0	0	0	0	0	0	0	0	0	0
1144	0	0	0	0	0	0	0	0	0	0	0	-0.0274047684297068	0	0	0	0	0	0	0	0	0	0	0	0	0	0	0	0	0	0	0	0	0	0	0	0	-0.0274047684297068	0	0	0	0	0	0	0	0	0	0	0	0
1145	0	0	0	0	0	0	0	0	0	0.0234741784037559	0	0	0	-0.0121921482565228	0	0	0	0	0	0.0938967136150235	0	0	0	0	0	0	0	0	0	0.0112820301472331	0	0	0	0	0	0	0	-0.0121921482565228	0	-0.0131022663658125	0	0	0.0112820301472331	0	0	0	0	0	0
1146	0	0	0	0	0	0	0	0	0	0	0	0	0	0	0	0	0	0	0	0	0	0	0	0	0	0	0	0	0	0	0	0	0	0	0	0	0	0	0	0	0	0	0.0415454923140839	0	0	0	0	0	0
1147	0	-0.00490340296165539	0	0	-0.00490340296165539	0	0	0	0.0113830392714855	-0.00490340296165539	0	0.022766078542971	0	0	0	0	0	0	0	0	0	0	0	0	0	0	0	0	0	0.0113830392714855	0	0	0	-0.00490340296165539	0	0.0113830392714855	-0.00490340296165539	0	0	0	0	0	0	0	0	0	0	0	0
1148	0	0	0	0	0	0	0	0	0	0	0	0	0	0	0	0	0	0	0	0	0	0	0	0	-0.00296340198547933	0	0	0	0	0	0	0	0	0	0	0	0	-0.00296340198547933	0	0	-0.00486476517067195	0	0	-0.00486476517067195	0	0	0	0	0
1149	0	0	0	0	0	0	0	0	0	0	0	0	0	0	0	0	0	0	0	0	0	0	0	0	0	0	0	0	0	0	0	0	0	0	0	0	0	0	0	0.00850051003060184	0	0	0	0	0	0	0	0	0
1150	0	0	0	0	0	0	0	0	-0.0162311313098523	0	0	0	0.0287521564117309	0	0	0	0	0	0	0	0	0	0	0	0	-0.0486933939295569	0	0	-0.0324622626197046	0	-0.0324622626197046	0	-0.0324622626197046	0	0	-0.0811556565492615	0.0125210251018786	0	0	0	-0.0162311313098523	0	-0.0324622626197046	-0.0162311313098523	0	0	0	0	0
1151	-0.031001343391547	0	0	0	0.0489476260401371	-0.031001343391547	0	-0.0103337811305157	0	0	0	0	0.0489476260401371	0	0	0	-0.0206675622610313	0.008697472664671	0	0	0	0	0	0.0244738130200685	0	0	0	0	0.0489476260401371	-0.0103337811305157	0	0	-0.0103337811305157	0	0	0.218628008714771	-0.0103337811305157	0.123454036246938	-0.0103337811305157	0	0	0	0.0282800637791058	0.0244738130200685	0.252350631718759	0	0	0	0
1152	0	0	0	-0.0113895216400911	0.046029919447641	0	0	-0.0113895216400911	0	0	0	0	0	0	0	0	-0.0113895216400911	0	0	0	0	0	0	0	0	0	0	0	0	-0.0113895216400911	0.046029919447641	0	0	0	0	0	-0.0113895216400911	0	0	0	0	-0.0113895216400911	0	0	0	0	0	0	0
1153	0	0	0	0	0	0	0	0	0	0	0	0	0	0	0	0	0	0	0	0	0	0	0	0	0	0	0	0	0	0	0	0	0	0	0	0	0	0	0	0	0	0	0	0	0	0	0	0	0
1154	0	0	0	0	0	0.0381533765738268	-0.0171614896172988	0	0	-0.0171614896172988	0	0	0	0	0	0	0	0	0	-0.0171614896172988	0	0.0381533765738268	0	-0.0171614896172988	0	0	0	0	0	0	0	0	0	0	0	0	0	0	0	0	0	0	0	0	0	0	0	0	0
1155	0	0	-0.00615991129727732	0	0	0	0	0	0	0	0	0	0	0	0	0	0	0	0	0	0	0	0	0	0	0.00958772770853308	0	0	-0.00615991129727732	-0.00273209488602152	0	0	0	0	0	0	0	0	0.0191754554170662	0	0	0	0	0	0	0	0	0	0
1156	0	0	0	0	0	0	0	0	0	0	0	0	0	0	0	0	0	0	0	0	0.0391083300743058	0	0	0	0	0	0	0	0	0	0.0391083300743058	0	0	0	0	0	0	0	0	0.0391083300743058	0	0	-0.0211685012701101	0	0	0	0	0	0
1157	0	0	0	0	0	0	0	0	0	0	0	0	0	0	0	0	0	0	0	0	0.0192196809532962	0	0	0	0	-0.0132257637878587	0	0	0	0	0	0.0192196809532962	0	0	0	0	0	0	0	0	0	0	0	0	0	0	0	0	0
1158	0	0	0	0	0	0	0	-0.03725782414307	0	0	0	0	0	0	0	0	0	0	0	0	0	0	0	0	0	0	0	0	0	0	-0.0745156482861401	0	0	0	0	-0.03725782414307	0	0	0	0	0	0	0	0	0	0	0	0	0
1159	0	0	0	-0.0176242509693338	0	0	0	0	0	0	0	0	0	0	0.0300661455201443	0	0	-0.00518235641852329	0	0	-0.0352485019386676	-0.0528727529080014	0.0300661455201443	0	0	0	0	0	0	0	0	0.0601322910402886	0	0	0	0	0	0	0	0	0	0	0	0	0	0	0	0	0
1160	0	0	0	0	0	0	0	0	0	0	-0.130671167710532	0	0	0	0	0	0	0	0	0	0	0	0	0	0	-0.0218007412252017	0	0	0	0	0	0	0	0	0	0	0	0	0	0	0	0	0	0	0	0	0	0	0
1161	0	0	0	0	0	0	0	0	0	0	0	0	0	0	0	0	0	0	0	0	0	0	0	0	0	0	0	0	-0.108945825009054	-0.0902527075812274	0	0	0	0	0	0	0	0	0	0	0	0	-0.0902527075812274	0	0	0	0	0	-0.0902527075812274
1162	0	0	0	0	0	0	0	0	0	0	0	0	0	0	0	0	0	0	0	0	0	0	0	0	0	0	0	0	0	0	0	0	0	0	0	0	0	0	0	0	0	0	0	0	0	0	0.0096630408015423	0	0
1163	0	0	0	0	0	0	0	0	0	0	0	0	0	0	0	0	0	0	0	0	0	0	0	0	0	0	0	0	0	0	0	0	0	0	0	0	0	0	0	0	0	0	0	0	0	0	0	0	0
1164	0.0719079604942962	-0.146670577882077	-0.0553279471213389	-0.035650463285893	0.0100208520944755	-0.0651059856468107	0.0230177678669373	-0.0422096245643756	-0.00285465689348399	-0.185418511630459	0.196046397647443	-0.094318694438724	0.0850262830512596	0.0653487992158144	-0.0521090698743489	0.0523518834433526	-0.0618871083998207	0.0033402840314918	-0.0586682311528307	0	0	0	0	0	0	0	0	0	0	0	0	0	0	0	0	0	0	0	0	0	0	0	0.0163371998039536	0	0	0	0	0	0
1165	0	0	0	0	0	0	0	0	0	0	0	0	0	0	0	0	0	0	0	0	0	0	0	0	0	0	0	0	0	0	0	0	0	0	0	0	-0.014421690222094	0	0	0	0	0	0	0	0	0	0	0	0
1166	0	0	0	0	0	0	0	0	0	0	0	0	0	0	0	0	0	0	0	0	0	0	0	0	0	0	0	0	0	0	0	0	0	0	0	0	0	0	0	0	0	0	0	0	0	0	0	0	0
1167	0	0	0	0	0	0	0	0	0	0	0	0	0	0	0	0	0	0	0	0	0	0	0	0	0	0	0	0	0	0	0	0	0	0	0	0	0	0	0	0	0	0	0	0	0	0	0	0	0
1168	0	0	0	0	0	0	0	0	0	0	0	0	0	0	0	0	0	0	0	0	0	0	0	0	0	0	0	0	0	0	0	0	0	0	0	0	0	0	0	0	0	0	0	0	0	0	0	0	0
1169	0.125156445556946	0	0	0	0	0	0	0	0	0	-0.0628535512256442	0	-0.125707102451288	0	0	0	0	0	0	0	0	0	0	0	0	0	0	0	0	0	0	0	0	0	0	0	0	0	0	0	0	0	0	0	0	-0.251414204902577	0	0	0
1170	0	0	0.0463177396943029	0	0	0	0	0	0	0	0	0	0	0	0	0	0	0	-0.0203873598369011	0	0	0	0	0	0	0	0	0	-0.0407747196738022	0	0	0	0	0	0	0	0	0	0	0	0	0	0	0	0	0	0	0	0
1171	0	0	0	0	0	0	0	0	0	0	0	0	0	0	0	0	0	0	0	0	0	0	0	0	0	0	0	0	0	0	0	0	0	0	0	0	0	0	0	0	0	0	0	0	0	0	0	0	0
1172	0.0719942404607631	0	-0.0490196078431373	0	0.143988480921526	-0.343137254901961	-0.245098039215686	0	0.0229746326176258	0	0.0459492652352515	0	-0.0980392156862745	0	0	0	-0.0490196078431373	0	-0.0490196078431373	0.0719942404607631	0	0	0.166963113539152	0	0	0	0	0.0719942404607631	0	0	0	0.0719942404607631	0	0	0	0	0	0	-0.196078431372549	0	0	0	0	0	0	0	-0.0490196078431373	0	-0.0490196078431373
1173	0	0	0	0	0	0	0	0	0	0	0	0	0	0	0	0	0	0	0	0	0	0	0	0	0	0	0	0	0	0	0	0	0	0	0	0	0	0	0	0	0	0	0	0	0	0	0	0	0
1174	0	0	0	0	0	0	0	0	0	0	0	0	0	0	0	0	0	0	0	0	0	0	0	0	0	0	0	0.00296573097854294	0	0	0	0	0	0	0	0	0	0	0	0	0	0	0	0	0	0	0	0	0
1175	0	0	0	0	0	-0.0222172850477672	0	0	0	0	0	0	0	0	0	0	0	0	0	0	0	0	0	0	0	0	0	0	0	0	0	0	0	0	0	0	0	0	0	0	0	0	0	0	0	0	0	0	0
1176	0	0	0	0	0	0	0	0	0	0	0	0	0	0	0	0	0	0	0	0	0	0	0	0	0	0	0	0	0	0	0	0	0	0	0	0	0	0	0	0	0	0	0	0	0	0	0	0	0
1177	0	0	0	0	0	0	0	0	0	0	0	0	0	-0.0154726907009129	0	0	0	0	0	0	0	0	0	0	0	0	0	0	0	0	0	0	0	0	0	0	0	0	0	0	0	0	0	0	0	0	0	0	0
1178	0	0	0	0	0	0	0	0	0	0	0	0	-0.00700304632515144	0	0	0	0	0	0	0	-0.00350152316257572	0	0	0	0	0	0	0	0	0	0	0	0	0	0	0	0	0	0	0	0	0	0	0	0	0	0	0	-0.00350152316257572
1179	0	0	0	0	0	0	0	0	0	0	0	0	0	0	0	0	0	0	0	0	0	0	0	0	0	0	0	0	0	0	0	0	0	0	0	0	0	0	0	0	0	0	0	0	0	0	0	0	0
1180	0	0	0	0	0	0	0	0	0	0	0	0	0	0	0	0	0	0	0	0	0	0	0	0	0	0	0	0	0	0	0	0	0	0	0	0	0	0	0	0	0	0	0	0	0	0	0	0	0
1181	0	0	0	0	0	0	0	0	0	0	0	0	0	0	0	0	0	0	0	0	0	0	0	0	0	0	0	0	0	0	0	0	0	0	0	0	0	0	0	0	0	0	0	0	0	0	0	0	0
1182	0	0	0	0	0	0	0	0	0	0	0	0	0	0	0	0	0	0	0	0	0	0	0	0.00465017147507302	0	0	0	0	0	0	0	0	0.198019801980198	0	0	-0.486911704869117	0	1.19044389761873	0.99009900990099	-0.093197186646258	0	-0.0978473581213307	0	0.198019801980198	-1.6426730735696	-0.0978473581213307	-0.293542074363992	-1.1604115401755	-0.195694716242661
1183	0	0	0	0	0	0	0	0	0	0	0	0	0	0	0	0	0	0	0	0	0	0	0	0	0	0	0	0	0	0	0	0	0	0	0	0	0	0	0	0	0	0	-0.00278963372109242	0	0	0	0	0	-0.00278963372109242
1184	0	0	0	0	-0.00949036727721363	0.0159897665494084	0	0	0	-0.00949036727721363	0.0159897665494084	0	0	0	0	-0.00949036727721363	0	0	0	0	0	0	0.0159897665494084	0	0	0	0	0	0	0	0	0	0	0	0	0	0	0	0	0	0	0	0	0	0	0	0	0	0
1185	0	0	0.0162271805273834	0	0.00931011612951386	0	0	0	0	0	0	-0.00691706439786954	0	0	0	0	0	0	0	0	0	0	0	0	0	0.00811359026369168	0	0	0	0	-0.00691706439786954	0	0	-0.0138341287957391	0.0162271805273834	0	0	0	0	0	0	0	0	0	0	0	0.0243407707910751	0	0
1186	0	0	0	0	0	0	0	0	0	0	0	0	0	0	0	0	0	0	0	0	0	0	0	0	0	0	0	0	0	0	0	0	0	0	0	0	0	0	0	0	0	0	0	0	0	0	0	0	0
1187	0	0	0	0	0	0	0	0	0	0	0	0	0	0	0	0	0	0	0	0	0	0	0	0	0	0	0	0	0	0	0	0	0	0	0	0	0	0	0	0	0	0	0	0	0	0	0	0	0
1188	0	0	0	0	0	0	0	0	0	0	0	0	0	0	0	0	0	0	0	0	0	0	0	0	0	0	0	0	0	0	0	0	0	0	0	0	0	0	0	0	0	0	0	0	0	0	0	0	0
1189	0	0	0	0	0	0	0	0	-0.0115326951908661	0	0	0	0	0	0	0	0	0	-0.0115326951908661	0	0	0	0	0	0	0	0	0	0	0	0	0	0	0	0	0	0	0	0	0	0	0	0	0	0	0	0	0	0
1190	0	0	0	0	0	0.0392772977219167	-0.103788271925272	0	0	0	0	0	0	0	0	-0.0259470679813181	0	0	0	0	0	-0.0259470679813181	0	0	0.11783189316575	0	-0.0259470679813181	0	0	0	0	0	0	0	0	0	0	0	-0.0518941359626362	0	0	0	0	0	0	0	0	0	-0.0259470679813181
1191	0	0	0	0	0	0	0	0	0	0	0	0	0	0	0	0	0	0	0	0.0085755938598748	0	0	0	0	0	0	-0.0019257062527682	0	0	0	0	0	0	0	0	0	0	0	0	0	0	0	-0.00577711875830461	0	0	0	0	-0.0019257062527682	0
1192	0	0.0470332612907789	0	0	0	0	0	0	0	0	0	0	0	0	0	0	0	0	0	0	0	0	-0.0700934579439252	0	-0.0233644859813084	0	0	0	0	0	0	0	-0.0233644859813084	0	0	0	-0.0934579439252336	0	0	0	-0.0467289719626168	0	0	0	0	0	0	0	0
1193	0	0	0	0	0	0	0	0	0	0	0	0	0	0	0	0	0	0	0	0	0	0	0	0	0	0	0	0	0	0	0	0	0	0	0	0	0	0	0	-0.0223313979455114	0	0	0	0	0	0	0	0	0
1194	0	0	0	-0.00591856060606061	0	0	0	0	0	0	0	0	0	0	0	0	0	0	0	0	0	0	0	0	0	0	0	0	0	0	0	0	-0.00591856060606061	0	0	-0.00591856060606061	0	0	0	0	0	0	0	0	0	0	0	0	0
1195	0	0	0	0	0	0	0	0	0	0	0	0	0	0	0	0	0	0	0	0	0	0	0	0	0	0	0	0	0	0	0	0	0	0	0	0	0	0	0	0	0	0	0	0	0	0	0	0	0
1196	0	0	0	0	0	0	0	0	0	0	0	0	0	0	0	0	0	0	0	0	0	0	0	0	0	0	0	0	0	0	0	0	0	0	0	0	0	0	0	0	0	0	0	0	0	0	0	0	0
1197	0	0	0	0	0	0	0	0	-0.00912575287461216	0	0	0	0	0	0	0	0	0	0	0	0	0	0	0	-0.00912575287461216	0	0	0	0	0	0	0	0	0	0	0	-0.0182515057492243	0	0	0	0	0	0	0	0	0	0	0	0
1198	0	0	0	0	0	0	0	0	0	0	0	0	0	0	0	0	0	0	0	0	0	0	0	0	0	0	0	0	0	0	0	0	0	0	0	0	0	0	0	0	0	0	0	0	0	0	-0.0170096955264501	0	0.0243467974429461
1199	0	0	0	0	0	0	0	0	0	0	0	0	0	0	0	0	0	0	0	0	0	0	0	0.0261848651479445	0	0	0	0	0	0	0	0	0	0	0	0	0	0	0	0	0	0	0	0.052369730295889	0	0	0	0	0
1200	0	0	0	0	0	0	0	0	0	0	0	0	0	0	0	0	0	0	-0.029146021568056	0	0	0	0	0	0	0	0	0	0	0	0	0	0	0	0	0	0	0	0.0454545454545455	0	0	0	0	0	0	0	0	0	0
1201	0	0	0	0	0	0	0	0	0	0	0	0	0	-0.00159015376786935	0	0	0	0	0	0	0	0	0	0	0	0	0	0	0	0	0	0	0	0	0	0	0	0	-0.00159015376786935	0	0	0	0	0	0	0	0	0	0
1202	0	0	0	0	0	0	0	0	0	0	0	0	0	0	0	0	0	0	0	-0.00612444879960804	0	0	0	0	0	0	0	0	0	0	0	0	0	0	0	0	0	0	0	0	0	0	0	0	0	0	0	0	0
1203	0	0	0	0	0	0	0	0	0	0	0	0	0	0	0	0	0	0	0	0	0	0	0	0	0	0	0	0	0	0	0	0	0	0	0	0	0	0	0	0	0	0	0	0	0	0	0	0	0
1204	0	0	0	0	0	0	0	0	0	0	0	0	0	0	0	0	0	0	0	0	0	0	0	0	0	0	0	0	0	0	0	0	-0.00902608538676776	0	0	0	0	0	0	0	0	0	0	0	0	0	0	0	0
1205	0	0	0	0	0	0	0	0	0	0	0	0	0	0	0	0	0	0	0	0	0	0	0	0	0	0	0	0	0	0	0	0	0	0	0	0	0	0	0	0	0	0	0	0	0	0	0	0	0
1206	0	0	0	0	0	0	0	0	0	0	0	0	0	0	0	0	0	0	0	0	0	0	0	0	0	0	0	0	0	0	0	0	0	0	0	0	0	0	0	0	0	0	0	0	0	0	0	0	0
1207	0	0	0	0	0	0	0	0	0	0	0	0	0	0	0	0	0	0	0	0	0	0	0	0	0	0	0	0	0	0	0	0	0	0	0	0	0	0	0	0	0	-0.00699839037021485	0	0	0	0	0	0	0
1208	0	0	-0.00899280575539568	-0.026978417266187	0	0	0	0	-0.00899280575539568	0	0	0	0	0	0	0	0	0	0	0	-0.00899280575539568	0	0	0	0	0	0	0	0	0	0	0	0	0	0	0	0	0	0	0	0	0	0	0	0	0	0	0	0
1209	0	0	0	0	0	0	0	0	0	0	0	0	0	0	0	0	0	0	0	0	0	0.0461150091546307	0	0	0	0	0	0	0	0	-0.043859649122807	0	0	0	0	-0.0719717351887668	0	-0.0146198830409357	-0.0292397660818713	0	-0.112448344263838	0	0	0.036005846177342	-0.0146198830409357	0	-0.0730994152046784	0	0
1210	0	0	0	0	0	0	0	0	0	0	0	0	0.00949577438040072	0	0	0	0	0	0	0	0	0	0	0	0	0	0	0	0	0	0	0	0	0	0	0	0	0	0	0	0	0	0	0	0	0	0	0	0
1211	0	0	0	0	0	0	0	0	0.0536193029490617	-0.0416319733555371	0	0	0	-0.0416319733555371	0	0	0	0	0	0	0	0	0	0	0	0	0	0	0	-0.0832639467110741	0	0	0	0	-0.0416319733555371	0	0	0	0	0	0	0	0	0	0	0	0	0	0
1212	0	0	0	0	0	0	0	0	0	0	0	0	0	0	0	0	0	0	0	0	0	0	0	0	0	0	0	0	0	0	0	0	0	0	0	0	0	0	0	0	0	0	0	0	0	0	0	0	0
1213	0	0	0	0	0	0	0	0	0	0	0	0	0	0	0	0	0	0	0	0	0	0	0	0	0	0	0	0	0	0	0	0	0	0	0	0	0	0	0	0	0	0	0.145874801273555	-0.0128932439401753	0	0.0450517647760838	0	0	0
1214	0	0	0	0	0	0	0	0	0	0	0	0	0	0	0	0	0	0	0	0	0	0	0	0	0	0	0	0	0	0	0	0	0	0	0	0	0	0	0	0	0	0	0	0	0	0	0	0	0
1215	0	0	0	0	0	0	0	0	0	0	0	0	0	0	0	0	-0.0428449014567266	0	0	0	0	0	0	0	0	0	0	0	0	0	0	0	0	0	0	0	0	0	0	0	0	0	0	0	0	0	-0.0428449014567266	0	-0.0428449014567266
1216	0	0	0	0	0	0	0	0	0	0	0	0	0	0	0	0	0	0	0	0	0	0	0	0	0	0	0	0	0	0	0	0	0	0	0	0	0	0	0	0	-0.0178316690442225	0	0	-0.0178316690442225	0	0	0	0.0289268151576511	0
1217	0	0	0	0	0	0	0	0	0	0	0	0	0	0	0	0	0	0	0	0	0	0	0	0	0	0	0	0	0	0	0	0	0	0	0	0	0	0	0	0	0	0	0	0	0	0	0	0	0
1218	0	0	0	0	0	0	0	0	0	0	0	0	0	0	0	0	0	0	0	0	0	0	0	0	0	0	0	0	0	0	0	0	0	0	0	0	0	0	0	0	0	0	0	0	0	0	0	0	0
1219	0	0	0	0	0.0959692898272553	0	0	0	0	0.0959692898272553	0	0	0.0953202221665883	0	0.0959692898272553	0	0	0	0.191289511993843	0	0	0	-0.0966183574879227	0	0	0	0	-0.0966183574879227	0	-0.0483091787439614	0	0	0.047011043422627	0	0	0.381929956327019	-0.0966183574879227	-0.00194720298200202	0	0	0	0	0	0	0	0	0	0	0
1220	0	0	0	0	0	0	0	0	0	0	0	0	0	0	0	0	0	0	0	0	0	0	0	0	0	0	0	0	0	0	0	0	0	0	0	0	0	0	0	0	0	0	0	0	0	0	0	0.016324467585467	0
1221	0	0	0	0.174825174825175	-0.0275633958103638	0	0	0	0	-0.0275633958103638	0	0	0	0	-0.0275633958103638	0	0	0	0	0	0	0	0	0	0	0	0	-0.0551267916207277	0	0	0	0	0	0.0582750582750583	0	0	0	0	0	0	0	0	0	0	0	0.0582750582750583	0	0	0
1222	0	0	0	0	0	0	0	0	0	0	0	0.0035544181417502	0	0	0	0	0	0	0	0	0	0	0	0	0	0	0	0	0	0	0	0	0	0	0	0	0	0	0	0	0	0	0	0	0	0	0	0	0
1223	0.0831024930747922	0	0	-0.0181818181818182	0.0277008310249307	0	-0.0363636363636364	0	0	-0.0363636363636364	0	0	0	-0.0181818181818182	0	0.0277008310249307	0	-0.0181818181818182	0	0	0	0	0.0277008310249307	0	0	-0.0086628053387057	0	0.0277008310249307	0	0.0554016620498615	0	0	0.0277008310249307	-0.0363636363636364	0.0554016620498615	0	0	0	-0.0181818181818182	0.0831024930747922	0	0.0554016620498615	0	0.0831024930747922	-0.0181818181818182	0	0	0	0
1224	0	0	0	0	0	0	0	0	0	0	0.00981932443047918	0	0	0	0	0	0	0	0	0	0	0	0	0	0	0	0	0	-0.00403697872512212	0	0	0	0	0	-0.00807395745024424	0	0	0	0.0011991222155827	0	0	-0.00229161174488722	0	0	0.00578234570535706	0	-0.028805095840507	0	-0.0121109361753664
1225	0	0.0116543191923575	0	0	0.00366518441565383	0.0023476525248617	-0.00432395036104985	0	-0.00432395036104985	0	0	0	-0.00864790072209971	0.0109955532469614	0.0472760427148261	0.0159782695534074	0.00798913477670368	0	0	0	0	0.00798913477670368	0	0	-0.0279200000024873	0	0.00798913477670368	0	0	0	-0.00930666666749572	0	0	0	0	-0.00864790072209971	0	-0.00864790072209971	-0.00432395036104985	0	0	0	0	0	0	0	0	0	0
1226	0	0	0	0	0	0	0	0	0	0	0	0	0	0	0	0	0	0	0	0	0	0	0	0	0	0	0	0	0	0	0	0	0	0	0	0	0	0	0	0	0	0	0	0	0	0	0	0	0
1227	0	0	0	0	0	0	0	0	0	0	0	0	0	0	0	0	0	0	0	0	0	0	0	0	0	0	0	0	0	-0.0038627935723115	0	0	0	0	0	0	0	0	0	0	0	0	0	0	0	0	0	0	0
1228	0	-0.00431015904486876	0	-0.00862031808973751	0	-0.00862031808973751	0	0	0	0	0	-0.00431015904486876	0	0	0	0	0	0	0	-0.00431015904486876	0	0	0	0	0	0	0	0	0.0221680336954112	0	-0.00862031808973751	0	0	0	0	0	0	0	0	0	0	0	0	0	0	0	0	0	0
1229	0	-0.0150488851995802	0	0	0	0	0	0	-0.019361833952912	0	0	0	0	-0.00774473358116481	0	0	0	0	0	0	-0.0116171003717472	0	-0.019361833952912	-0.0038723667905824	0	-0.00774473358116481	0	0	0	0	0	0	0	0	0	-0.00774473358116481	0	0	0	0	0	0	0	0	0	0	0	0	0
1230	0	0	0	0	0	0	0	0	0	0	0	0	0	0	0	0	0	0	0	0	0	0	0	0	0	0	0	0	0	0	0	0	0	0	0	0	0	0	0	0	0	0	0	0	0	0	0	0	0
1231	0	0	0	0	0	0	0	0	0	0	0	-0.042185192997258	0	0	0	0	0	0	0	0	0	0	0	0	0	0	0	0	0	0	0	0	0	0	0	0	0	0	-0.021092596498629	0	0	0	0	0	0	0	0	0	0
1232	0	-0.0848536274925753	-0.0212134068731438	0	0	0	0	0	0	0	0	0	0	0	0	-0.0424268137462877	0	0	-0.0212134068731438	0	0	0	0	0	0	0	0	0	0	0	0	0	0	0	0	0	0	0	0	0.0550660792951542	0	0	0	0	0	0	0	-0.0636402206194315	0
1233	0	0	0	0	0	0	0	0	0	0	0	0	0	0	0	0	0	0	0	0	0	0	0	0	0	0	0	0	0	0	0	0	0	0	0	0	0	0	0	0	0	0	0	0	0	0	0	0	0
1234	-0.0490196078431373	0	0	0	0	0	-0.0490196078431373	0	0	0	0	0	0	0	0	0	0	0	0	0	0	0	0	0	-0.0245098039215686	0	0	0	0	0	0	0	0	0	0	0	0	0	0	0	0	0	0	0	0	0	0	0	0
1235	0	0	0	0	0	0	0	0	0	0	0	0	0	0	0	0	0	0	0	0	0	0	0	0	0	0	0	0	0	0	0	0	0	0	0	0	0	0	0	0	0	0	0	0	0	0	0	0	0
1236	0	0	0	0	0	0	0	0	0	0	0	0	0	0	0	0	0	0	0	0	0	0	0	0	0	0	0	0	0	0	0	0	0	0	0	0	0	0	0	0	0	0	0	0	0	0	0	0	0
1237	0	0	0	0	0	0	0	0	-0.0106826193782716	0	0.0278744986215669	0.0162575191025849	-0.0106826193782716	0	0	0	0	-0.0106826193782716	0	0	0	0	-0.0264729584105013	0	0	0	0	0	0.0055748997243133	0	0	0.0060420797946686	0	0	0	0	0	0	0	0	0	-0.0106826193782716	0	0	-0.0106826193782716	0	0	0.141677132339661	0
1238	0	0	-0.0152372010233762	-0.00414439056736707	0	0	0	-0.00414439056736707	-0.00599319231003525	-0.00414439056736707	0	0	0	0	-0.0432927074163389	0.029719347891994	0.00459117764939776	0	-0.0124331717021012	-0.0207219528368353	-0.0372995151063036	-0.0346187926141197	0.000446787082030701	-0.00828878113473414	-0.0368527280242729	-0.00184880174266819	-0.0276703727254774	-0.00414439056736707	-0.0207219528368353	-0.093965408623138	-0.0165775622694683	0	0.007780340638158	0	-0.0331551245389365	0	-0.0036976034853364	0	0	0.0220623140829274	0	0	-0.00414439056736707	0	-0.0714715206383928	0	0	0	-0.0032508164033057
1239	0	0	0	0	0	0	0	0	0	0	0	0	0	0	0	0	0	0	0	0	0	0	0	0	0	0	0	0	0	0	0	0	0	0	0	0	0	0	0	0	0	0	0	0	0	0	0	0	0
1240	0.0624609618988132	0	0	0	0	0	0	0	0	0	0	0	-0.0454029511918275	0	0	0	0	0	-0.113507377979569	0	0	0	0	0	-0.0454029511918275	0	0	0	0	0	0	0	0	0	0	0	0	0	0.249843847595253	0	0.0397594863028995	-0.0454029511918275	0	0	0	0	0	0	0
1241	0	0	-0.0313087038196619	0.0585480093676815	0	0	0	-0.0313087038196619	0	-0.0313087038196619	0	0	0	0	0	0	0	0	0	0	0	0	0	0	0	0	0	0	0	0	0	0	0	0	0	0	0	0	0	0	0	0	0	0	0	0	0	0	0
1242	0.00725832689345399	-0.00313488282188801	0.017096939647803	0	0	-0.0024596531885871	-0.0274901493631449	0	-0.00916338312104829	0.096987101876344	0	0	0	0	0	0	0	0	0	-0.00916338312104829	0	0	0	0	0	0	0	0	0	0	0	0	0	0	0	0	0	0	0	0	0	0	0	0	0	0	0	0	0
1243	0	0	0	0	0	0	0	0	0	0	0	0	0	0	0	0	0	0	0	0	0	0	0	0	0	0	0	0	0	0	0	0	0	0	0	0	0	0	0	0	0	0	0	0	0	0	0	0	0
1244	0	0	0	0	0	0	-0.0694927032661571	0	0	0	0	0	0	0	0	0	0	0	0	0	0	0	0	0	0	0	0	0	0	0	0	0	0	0	0	0	0	0	0	0	0	0	0	0	0	0	0	0	0
1245	0	0	0	0	0	0	0	0	0	0	0	0	0	0	0	0	-0.0176087339320303	0	0	0	0.0361925443358668	0	0	-0.0176087339320303	0	0	0	0	0	0	-0.0176087339320303	0	0	-0.0176087339320303	0	0	0	0	0	0	0	0	0	0	0	0	-0.0176087339320303	0.0361925443358668	0
1246	0	0	0	0	0	0	0	0	0	0	0	0	0	0	0	0	0	0	0	0	0	0	0	0	0	0	0	0	0	0	0	0	0	0	0	0	0	0	0	0	0	0	0	0	0	0	0	0	0
1247	-0.00548095368594135	0	0	0	0	0	0	0	0	0	0	0	0	0	0	0	0	0	0	0	0	0	0	0	0	0	0	0	0	0	0	0	0	0	0	0	0	0	-0.00274047684297068	0	0	0	0	0	0	0	0	0	0
1248	0	0	0	0	0	0	0	0	0	0	0	0	0	0	0	0	0	0	0	0	0	0	0	0	0	0	0	0	0	-0.0289771080846132	0	0	0	0	0	0	0	0	0	0	0	0	0	0	0	0	0	0	0
1249	0	0	0	0	0	0	0	0	0	0	0	0	0	0	0	0	0	0	0	0	0	0	0	0	0	0	0	0	0	0	0	0	0	0	0	0	0	0	0	0	0	0	0	0	0	0	0	0	0
1250	0	0	0	0	0	0	0	0	0	0	0	0	0	0	0	0	0	0	0	0	0	0	0	0	0	0	0	0	0	0	0	0	0	0	0	0	0	0	0	0	0	0	0	0	0	0	0	0	0
1251	0	0	0	0	0	0	0	0	0	0	0	0	0	0	0	0	0	0	0	0	0	0	0	0	0	0	0	0	0	0	0	0	0	0	0	0	0	0	0	0	0	0	0	0	0	0	0	0	0
1252	0.275352888072149	0	-0.141147810477618	-0.0126374320738026	-0.0442310122583091	-0.0063187160369013	0	0	-0.0459219669988473	0	0	0	0	-0.0189561481107039	0	0.0092555225927263	-0.0063187160369013	0	0	0	0	0	0	-0.0126374320738026	0	0	0	0	0	0.0172651933701657	0	0	-0.0189561481107039	0	0	0	0	0	0	0	0	0	0	0	-0.0063187160369013	0	0	0	0
1253	0	0	0	0	0	0	0	0	0	0	0	0	0	0	0	0	0	0	0	0	0	0	0	0	0	0	0	0	0	0	0	0	0	0	0	0	0	0	0	0	0	0	0	0	0	0	0	0	0
1254	0	0	0	0.0115734043168798	-0.0145348837209302	-0.00148073970202522	-0.00363372093023256	0	0	0	0	0	0	0	0.0360646960030037	-0.0109011627906977	-0.00726744186046512	0	-0.0109011627906977	-0.00363372093023256	0	0	-0.00363372093023256	0	0	-0.0109011627906977	0	0	-0.0160156234229554	0	0	-0.093813544381987	-0.006595200334283	0	0	0	0	-0.00726744186046512	0	0	-0.0298782656177036	0	0	-0.00726744186046512	-0.00363372093023256	0	0	0.0057867021584399	0
1255	-0.0542299349240781	0.192678227360308	0	0	-0.162689804772234	0	0	0	0	0	0	-0.0542299349240781	0	0	-0.0542299349240781	0.0963391136801541	0	0	0	-0.0542299349240781	0	0	0.0963391136801541	0	0	0	0	0	0	-0.162689804772234	0	0	0	0	0	0	0	0	0	0	0	0	0	0	0	0	0	0	0
1256	0	0	0	0	0	0	0	0	0	0	0	0	0	0	0	0	0	0	0	0	0	0	-0.00276717029165975	0	0	0	0.00590527931971182	0.0118105586394236	0.00590527931971182	0	-0.00276717029165975	-0.00830151087497925	0	-0.00276717029165975	0	0.00037093873639232	0	0	0.0118105586394236	0	0	0	-0.00276717029165975	0	0	0.00590527931971182	0	-0.00276717029165975	0
1257	0	0	0	0.00426255367229872	0.0084382817316479	-0.00128744866298456	0	-0.00257489732596913	0	0	-0.00386234598895369	0	0.0045583006655119	0	-0.00128744866298456	0	0	0	0	0	-0.00128744866298456	0	0.00654170400505466	0	0	-0.00257489732596913	0	0.00227915033275595	0.0045583006655119	0	0.00227915033275595	0	0	0	0	0	-0.00128744866298456	0.0045583006655119	0	0	0	0	0	0	0	0	0	0	0.00227915033275595
1258	0	0	0	-0.0658761528326746	0	0	0	0	0	0	0	0	0	0	0	0	0	0	0	0	0	0	0	0	0	0	0	0	0	0	0	0	0	0	0	0	0	0	0	0	0	0	0	0	0	0	0	0	0
1259	0	0	0	0	0	0	0	0	0	0	0	0	0	0	0	0	0	0	0	0	0	0	0	0	0	0	0	0	0	0	0	0	0	0	0	0	0	0	0	0	0	0	0	0	0	0	0	0	0
1260	0	0	0	0	0.000322155607601584	0	0	0	0	-0.000135223212957629	0	0	0	0	0	0	0	0	0	0	0	0	0	-0.000811339277745775	-0.000135223212957629	0	0	0	0	0	0	0	0	0	0	0	0	0	0	0	0	0	0	-0.000676116064788146	0	0	0	-0.000270446425915258	0
1261	0.268817204301075	0	0	0	0	0	0	0	0	0	-0.0677506775067751	0	0	0	0	0	0	0	0	0	-0.0677506775067751	0	-0.0677506775067751	0	0	0	0	0.134408602150538	0	0	0	0	0	0	-0.0677506775067751	0	0	-0.0677506775067751	0	0	0	0	0	0	0	0	0	0	0
1262	0	0	0	0	0	0	0	0	0	0	0	0	0	0	0	0	0	0	0	-0.0150285542530809	0	0	0	0	0	0	0	0	0	0	0	0	0	0	0	0	0	0	0	0	0	0	0	0	0	0	0	-0.0150285542530809	0
1263	0	0	0	0	-0.000952507953441411	0	0	0	0	0	0	0	0	0	0	0	0	0	0	0	0	0	0	0	0	0	0	0	0	0	0.0145901260790891	-0.000952507953441411	0	0	0	0	0	0	0	0	0	0	0	0.0280902411240695	0	0	0	0.0261852252171867	0.000980008569574859
1264	0	0	0	0	0	0	0	0	0	0	0	0	0	0	0	0	0	0	0	0	0	0	0	0	0	0	0	0	0	0	0	0	0	0	0	0	0	0	0	0	0	0	0	0	0	0	0	0	0
1265	0	0	0	0	0	0	0	0	0	0	0	0	0	0	0	0	0	0	0	0	0	0	0	0	0	0	0	0	0	0	0	0	0	0	0	0	0	0	0	0	0	0	0	0	0	0	0	0	0
1266	0	0	0	0	0	0	0	0	0	0	0	0	0	0	0	0	0	0	0	0	0	0	0	0	0	0	0	0	0	0	0	0	0	0	0	0	0	0	0	0	0	0	0	0	0	0	0	0	0
1267	0	0	0	0	-0.0227769679300292	0	0	-0.00455539358600583	0	0	0	0	0	0	0	0	0	0	0	0	-0.00455539358600583	0	0	0	0	0	0	0	0	0	0	0	0	0	0	0	0	0	0	0	0	0	0	0	0	0	0	0	0
1268	0	0	0	0	0	0	0	0	0	0	0	0	0	0	0	0	0	0	0	0	0	0	0	0	0	0	0	0	-0.0188182160331201	0	0	0	0	0	0	0	0	0	0	0	0	0	0	0	0	0	0	0	0
1269	-0.091041850989448	-0.092143810013307	0.064307853644285	-0.039444829508082	-0.033376394199146	0.024289062591155	-0.026749318700575	0.048578125182309	-0.085788393931848	-0.055446217387169	-0.066209469564069	-0.114772273390966	-0.136570437161877	0.00498179764048801	-0.142910531887925	0.060443336383069	0.086936317021943	-0.182914001585642	0.012439172745807	0.047747825575561	-0.126637484591726	-0.040546788531942	0.012152191973283	-0.084973415680511	-0.072006245455893	-0.00605311395352401	0.056578819121853	-0.053242299339449	0.0322897565306979	0.000558640189636	-0.0151710882723392	0.00828767471206701	0.00442315745085201	-0.017646665737171	-0.086618693538596	0.00138893979638399	-0.019307264950667	0.108734480792854	0.046932847324225	-0.065107510540208	-0.092974109620055	-0.00744205374990799	0.0355956336022781	-0.0201375645574149	0.0758860840725199	-0.0361389524365024	0.0549182199083572	-0.020967864164163	-0.048275823054374
1270	0	0	0	0	0	0.000818578384357009	0.0016289203757086	0	0.0040681827427688	0	0.00813636548553761	0.0040681827427688	0	0	0.007326023494186	0.00813636548553761	0	0	0	0.0040681827427688	0	0	0	0	0	0	-0.0073177871011806	-0.0024392623670602	0	0	0	0	0.0040681827427688	0	0	-0.0024392623670602	0	0	0	-0.0073177871011806	0	0	0	0	0	0	0	0	-0.0048785247341204
1271	0	0	0	0	0.0126262626262626	0	0.0297021729973488	0	0	0	0	0	0	0	-0.00817661488143908	0	0	0	0	0	0	-0.0119035820180547	0	0	0.0505050505050505	0	0	0	0	-0.0156305491546701	0	0	0	0	0	0	0	0	0	0	0	0	0	0	0	0	0	0	0
1272	-0.00244521147309897	0.00349625900286693	0.00384660817945625	-0.00279556064968829	0.00174812950143347	0	-0.00524077212278727	-0.00139778032484415	-0.00838306556755174	-0.0157223163683618	-0.0181675278414608	-0.0167733638981298	-0.0041861082115062	-0.00838306556755174	-0.00559112129937659	-0.00768598359588627	-0.00314229344476449	-0.00209486229650966	-0.00419334097453244	-0.00524077212278727	0.00699251800573386	0.00629543603406836	-0.00838668194906489	-0.00139778032484415	-0.0136274540718521	-0.00279556064968829	0.00349625900286693	0.00174812950143347	-0.00419334097453244	0	0	0.00035034917658932	0	-0.00139778032484415	0.00174812950143347	0	0	0	0	0	-0.00139778032484415	0	0.00174812950143347	0	0	0	-0.00139778032484415	0	0
1273	0	0	0	0	0.0117046915102061	0	-0.0162246588369139	0	0	0	0	0	0	0	0	0	0	0	0	0	0	0	0	0	0	0	0	0	0	0	0	0	0	0	0	0	0	0	0	0	0	-0.00883080183680678	0	0	0	-0.00883080183680678	0	0	0
1274	0	0	0	0	0	0	0	0.0282805429864253	0	0	0	0	0	0	0	0	0	-0.0145327713995059	0	0	0	0	0	-0.0145327713995059	0	0	0.0420283145733448	0	0	0	0	0	0	0	0	0	0	0	0	0	0	0	0	0	0	0	0	0	0
1275	0	0	0.0286615075952995	0	0	0	0	0	0	0	0	0	0	0	0	0	0	0	0	0	0	0	0	0	0	0	0	0	0	0	0	0	0	0	0	0	0	0	0	0	0	0	0	0	0	0	0	0	0
1276	0	0	0	0	0	0	0	0	0	0	0	0	0	-0.0403551251008878	0	0	0	0	0	0	0	0	0	0	0	0	0	0	0	0	0	0	0	0	0	0	0	0	0	0	0	0	0	0	0	0	0.0867096779486672	0	0
1277	0	0	0	0	0	0	0	0	0	0	0	0	0	0	0	-0.01998001998002	0	0	0	0	0	0	0	0	0.0269519707458817	0	0	0	0	0	0	0	0	0	0	0	0.0134759853729409	0	0	0	0	0	0	0	0	0	-0.03996003996004	-0.105000386030831	0
1278	0.0264690312334569	0	0	0	0	0	0	0	0	0	0	0	0	0	0	0	0	0	0	0	0	0	0	0	0	0	0	0	0	0	0	0	0	0	0	0.0264690312334569	0	0	0	0	0.0264690312334569	0	0	0	0	0	0	0	0
1279	0	0	0	0.00276050270857732	0	0	0	0	0	0.0168681473151532	0	0	0	0.00562271577171774	0	0	0	-0.0143110653157021	-0.00572442612628084	0	0	0	0	-0.00286221306314042	0	0	0.00562271577171774	-0.00572442612628084	0	0	0	0	0	0	0	0	0	-0.00286221306314042	0	0.00562271577171774	0	0	0	0	0	0	0	0	0
1280	0	0	0	0	0	0	0	0	0	0	0	0	0	0	0	0	0	0	0	0	0	0	0	0	0	0	0	0	0	0	0	0	0	0	0	0	0	0	0	0	0	0	0	0	0	0	0	0	0
1281	0	0	0	0	0	0	0	0	0	0	0	0	0	0	0	0	0	0	0	0	0	0	0	0	0	0	0	0	0	0	0	0	0	0	0	0	0	0	0	0	0	0	0	0	0	0	0	-0.00746602956547708	0
1282	0.018801153361165	-0.064471769605372	-0.055201658745695	-0.310811810848812	-0.153955082187783	-0.129204470852555	0.077493449506019	0.046872417582007	-0.112874047809281	0.01897113787471	-0.0228807816862367	0.065412639301362	-0.037511359594064	-0.0225408126591473	0.012250794718202	0.0430418111557589	-0.022710797172692	0.0136106708265599	0.035301560917984	0.049762154312266	0.00604040510232899	-0.104453859517327	0.181607339996257	0.071623028917235	-0.054861689718606	-0.103943905976693	0.034621622863805	-0.254918304305946	0.107944496916486	-0.0380213131346978	-0.040231111810778	-0.032320877059458	0.0292611558156547	0	-0.044401687264116	0.0146305779078274	-0.029601124842744	0	0.00723029669714139	0	0.0438917337234821	0	0.00723029669714139	0	-0.022200843632058	0	0	0	0
1283	0	0	0	-0.00816060062020565	0	0	0	0	0	0	0	0	0	0	0	0	0	0	0	0	0	0	0	0	0	0	0	0	0	0	0	0	0	0	0	0	0	0	0	0	0	0.0131509731720147	0	0	0	0	0	0	0
1284	0	0	0	0	0	0	0	0	0	0	0	0	0	0	0	0	0	0	0	0	0	0	0	0	0	0	0	0	0	0	0	0	0	0	0	0	0	0	0	0	0	0	0	0	0	0	0	0	0
1285	0	0	0	0	0	0	0	0	0	0	0	0	0	0	0	0	0	0	0	0	0	0	0	0	0	0	0	0	0	0	0	0	0	0	0	0	0	0	0	0	0	0	0	0	0	0	0	0	0
1286	0.119688809096349	-0.118927466455674	-0.0340880393645748	0	0.439179784025769	0.0598444045481747	0.249231977655024	0	0.6878515284169	0.103686248686684	-0.0062487556357312	15.2904752013464	0.158704028192087	-0.0521735183194843	-0.0160025604096655	-2.60669355211735	0.0556785674576868	-1.78934195000823	0.0438418441385092	-0.0320051208193311	-12.1773595085806	-0.384722237784257	-0.0480076812289966	0.0139196418644219	-1.21477246054162	-0.0160025604096655	-0.194113643461231	0	-0.0480076812289966	0	0	0.0737640464125966	-0.0820957205935716	-0.0320051208193311	0.0897666068222621	-0.9588895084973	0.192892622245053	0.116945102598822	0.015341772457381	-0.0980982810032366	-0.0361709579098186	0.988955360326229	0.149611011370437	0.0598444045481747	0	0	-0.0160025604096655	0	0
1287	0	0.001402013291086	0	0	0	0	0	0	0	0	0	0	0	0	0	0	0	0	0	0	0	0	0	0	0	0	0	0	0	0	0	0	0	0	0	0	0	0	0	0	0	0	0	0	0	0	0	0	0
1288	0.00499525450821719	0	0	0	-0.0012248114244817	0	0	0	0	0.00499525450821719	0	0	0.00499525450821719	0	0	0	-0.00622006593269889	-0.0124401318653978	0	0	0	0	0	0	0	0	0	0	0	0	0	0	0	-0.0136649432898795	0	0	-0.00622006593269889	0	0	0	0	-0.00622006593269889	0	0	0	0	0	-0.0124401318653978	0
1289	0	0	0	0	0	-0.0197093900000251	0	0	0	0	0	0	0	0	0	0	0	0	0	0	0	0	0	0	0	0	0	0	0	0	0	0	0	0	0	0	0	0	-0.0233100233100233	0	0	0	-0.0233100233100233	0	0	0	0	0	0
1290	0	0	0	0	0	0	0	0	0	0	0	0	0	0	0	0	0	0	0	0	0	0	0	0	0	0	0	0	0	0	0	0	0	0	0	0	0	0	0	0	0	0	0	0	0	-0.0917431192660551	0	0	0
1291	0	0	0	0	0	0	0	0	0	0	0	0	0	0	0	0	0	0	0	0	0	0	0	0	0	0	0	0	0	0	0	0	0	0	0	0	0	0	0	-0.0636638548464109	0	0	0	0	0	0	0	0	0
1292	0	0	0	-0.010924186148132	0	0	0	0	0	0	0	0	-0.010924186148132	0	0	0	0	0	0	0	0	0	0	0	0	0	0	0	0	0	0	0	0	0	0	0	0	0	0	0	0	0	-0.0218483722962639	0	0	0	0	0	0
1293	0	0	0	0	0	0	0	0	0	0	0	0	0	0	0	0	0	0	0	0	0	0	0	0	0	0	0	0.00645994832041344	0	0	0.0129198966408269	0	0	0	0	0	0	0	0	0	0	0	0	0	0	0	0	0	0
1294	0	0	0	0	0	0	0	0	0	0	0	0	0	0	0	0	0	0	0	0	0	0	0	0	0	0	0	0	0	0	0	0	-0.00386428626632661	0	0	0	0	0.00319846473692628	0	0	0	0	0	0	0	0	0	0	0
1295	0	0	0	0	0	-0.012278978388998	0	0	0	-0.012278978388998	0	-0.0368369351669941	0	0	0	0.0272479564032698	0	0	0	0	0	0	0	0	0	0	0	0	0	0	0	0.0136239782016349	0	0	0	0	0	0	0	0	0	0	0	0	0	0	0	0	0
1296	0	0	0	-0.0675219446320054	0	-0.135043889264011	0	0	0	0	0	0	0	0	-0.0675219446320054	0	0	0	0	0	0	0	0	0	0.198412698412698	0	0	0	0	0	0	0	0	0	-0.0675219446320054	0	-0.202565833896016	0	0	0	0	0	0	0	0	0	0	0	0
1297	0	0	0	0	0	0	0	0	0	0	0	0	0	0	0	0	0	0	0	0	0	0	0	0	0	0	0	-0.00449337227589306	0	0	0	0	0	0	0.00645161290322581	0	0	0	0	0	0	0	0	0	0	-0.00898674455178611	0	0	0
1298	0	0.0093939221410274	0	0	0	0	0	0	0	0	0	0	0	0	0	0	0	0	0	0	0.0281817664230823	0	0	0	0	-0.0061751265900951	0.0155690487311225	0	0	0	0	0	0	0	0	0	0	0	0	0	0	0	0	0	0	0	0.0155690487311225	0	0.0032187955509323
1299	0	-0.00747104968248039	0	0	0	-0.00747104968248039	0	0	0	0	0	0	-0.00747104968248039	0	0	0	0	0.0313563624704996	0	-0.0149420993649608	0	-0.00747104968248039	0.01941370607649	0	0	0	-0.00747104968248039	0	-0.00747104968248039	0	0	0	0	0	0	0	0	0	0	0	0	0	0	0	0	0	0	0	0
1300	0	0.000569790829786385	0	0	-0.000809640017046215	0	0	0	0	0	0	0	-0.000459810282277532	0	0	0	0	0	0	0	0	0	0	0	0	0	0	0	0	0	0	0.00170937248935916	0	0	0	0	0	0	0	0	-0.000459810282277532	0	0	-0.000459810282277532	0	0	-0.00599742176185004	0	0
1301	0.046855340564421	0	0	0	0	0	0	0	0	0	0	0	-0.0152928582352042	0	0	0	0	0	0	0	0	0	0	0	0	0	0	0	0	0	0	0.0848432946877297	0	0	0	0	0	0	0	0	0	0	0	0	-0.0152928582352042	0	0	0.0384763370527126	-0.0305857164704083
1302	0	0	-0.0733137829912024	-0.0366568914956012	-0.0733137829912024	0	0	0	0	0	0	0	0.0683851253111218	0	0	-0.0366568914956012	-0.146627565982405	0	-0.0366568914956012	0	0	0	0	0	-0.0366568914956012	0	0	0	-0.0366568914956012	0	0.0525210084033613	0	-0.0733137829912024	0	-0.0366568914956012	0	0	-0.0366568914956012	0	0	-0.0366568914956012	-0.109970674486804	0.0525210084033613	0	0.0525210084033613	0	-0.219941348973607	-0.109970674486804	0
1303	0	0	0	0	0	0	0	0	0	0	0	0	0	0	0	0	0	0	0	0	0	0	0	0	0	0	0	0	0	0	0	0	0	0	0	0	0	0	0	0	0	0	0	0	0	-0.0414336026517506	0	0.0301114122252334	0
1304	0	0	0	0	0	0	0	0	0	0	0	0	0	0	0	0	0	0	0	0	0	0	0	0	0	0	0	0	0	0	0	0	0	0	0	0	0	0	0	0	0	0	0	0	0	0	0	0	0
1305	-0.0445831475702185	0	-0.0445831475702185	0	0	0	-0.0445831475702185	0.0143533735966231	0	0	0	0	0	0	0	0	0	0	0	0	0	0	0	0	0	0	0	0	0	0	0	0	0	0	0	0	0	0	0	0	0	0	0	0	0	0	-0.0445831475702185	0	0
1306	-0.028328611898017	0	0	0	0	0	0.055397879794952	0.0467945718296678	0	-0.0480539158307495	0	0	0	0	-0.028328611898017	0	-0.056657223796034	0	0	0	0.0369319198633015	0	0	-0.028328611898017	0	0	0.0652605317613185	0	-0.113314447592068	0	0	0	0.0652605317613185	0	0	0.0935891436593355	-0.0665198757624002	-0.028328611898017	-0.084985835694051	-0.056657223796034	0	0	0	0	-0.133039751524801	0	0.083726491692969	-0.028328611898017	0
1307	0	0	0	0	-0.0264900662251656	0	0	-0.0264900662251656	0	-0.0264900662251656	0	0	0	0	0	0	0	0	0	0	0	0	0	0	0	0	0	0	0	0	0	0	0	0	-0.0529801324503311	0	0	0	0	0.0931532370749884	-0.0264900662251656	0	0	0	0	0	-0.0264900662251656	0	0
1308	-0.0662251655629139	0	0	0	0	0	-0.0662251655629139	0	0	0	0	0	0	0.106951871657754	0	0	0	0	0	0.213903743315508	0	0	0	0	0	-0.0662251655629139	0	-0.0662251655629139	0	0	0	0	0	0	0	0	0	0	0	0	0	0	0	0	0	0	0	0	0
1309	0	0	0	0	0	0	0	0	0	0	0	0	0	0	0	0	0	0	0	0	0	0	0	0	0	0	0	0	0	0	0	0	0	0	0	0	0	0	0	0	0	0	0	-0.00667824228663016	0	0	-0.00667824228663016	0	0
1310	0	0	0	0	0	0	0	0	0	0	0	-0.00963020030816641	0	0	0	0	0	0	0	0	0	0	0	0	0	0	0	0	0	0	0	0	0	-0.00963020030816641	0	0	0	0	0	0	0	0	0	0	0	0	0	0	0
1311	0	0	0	0	0	0	0	0	0	0	0	0	0	0	0	0	0	0.181818181818182	0	0	0	0	0	0	0	0	0	0	0	0	0	0	0	0	0	0	0	0	0	0	0	0	0	0	0	0	0	0	0
1312	0	0	0	0	0	0	0	0	0	-0.0338180588434224	0	0	0	0	0	0	0	0	0	0	0	0	0	0	0	0	0	0	0	0	0	0	0	0	0	0	0	0	0	0	0	0	0	0	0	0	0	0	0
1313	0	0	0	0	0	0	0	0	0	0	0	0	0	0	0	0	0	0	0	0	0	0	0	0	0	0	0	0	0	0	0	0	0	0	0	0	0	0	0	0	0	0	0	0	0	0	0	0	0
1314	0	0	0	0	0	0	0	0	0	0	-0.0125849484017116	0	0	-0.0125849484017116	0	0	0	0	0	0	-0.0125849484017116	0	0	0	0	-0.0125849484017116	0	0	0	0	0	0	0	0	0	0	0	0	0.0224719101123595	0	0	0	-0.0125849484017116	0	0	0	0	-0.0125849484017116	0.0224719101123595
1315	0	0.0321543408360129	0	0	0	0	0.0321543408360129	0	0.0160771704180064	0	0	0	0	0	0	0	0	0	0.0160771704180064	0	0	0	0	0	0	0	0	0.0057869872527461	0.0482315112540193	0	0	0	0	0	0.0160771704180064	-0.0205803663305207	0	0	0	0	0	0	0	-0.0102901831652603	0.0160771704180064	0	0	0	-0.0102901831652603
1316	0	0	0	0	-0.0146316482551759	-0.0219474723827639	0	0	0	0	0	0	0	-0.0219474723827639	-0.00731582412758797	0	-0.0146316482551759	0	0	-0.00731582412758797	0	0	0	0	0	0	0	0	0	0	0	0	0	0	0	0	0	0	-0.00731582412758797	0	0	0	0	0	0	0	0	0	0
1317	0	0	0	0	0	0	0	0	0	0	0	0	0	-0.00395491398062092	0	0.0309055320902442	0	0	0.0277797362666814	0	0	0	0	0	0	0	0	-0.00395491398062092	0	0	0	0	0	0	0	0	0	0	0	0	0	0	0.0253877201978418	0	0	0	0	0	0
1318	0	0	0	0	-0.0471728935571104	0	0	0.038716802577634	-0.0184621065263547	0	-0.027693159789532	0	-0.0738484261054186	0	0.129937299876019	0	0	-0.0064932445891928	-0.0037554359152082	-0.00923105326317733	0	0	0	0.021902469391877	0	-0.0536661381463032	0	0	-0.0249553511155474	0	-0.0184621065263547	0	0	0.0119688619371619	0	0	0	0	-0.027693159789532	0	0	0	0	-0.00923105326317733	0	0	0	0	0.0211999152003392
1319	0	0	0	0	0	0	0	0	0	0	0	0	0	0	0	0	0	0	0	0	0	0	0	0	0	0	0	0.025997660210581	0	0	0	0	0	0	0	0	0	0	0	0	0	0	0	0	0	0	0	0	0
1320	0	0	0	0	0	0	0	0	0	0	0	0	0	0	0	0	0	0	0	0	0	0.0558971492453885	0	0	0	0	0	-0.0209907640638119	0	0	0	-0.0629722921914358	0	0	0	0	0	0	0	0	0	0	0	0	0	0	0	0	0
1321	0	0	0	0	0	0	0	0	0	0	0	0	0	0	0	0	0	0	0	0	0	0	0	0	0	0	0	0	0	0	0	0	0	0	0	0	0	0	0	0	0	0	0	0	0	0	0	0	0
1322	-0.0911577028258888	0	0	0	0	0	0	0	0	0	0	-0.0911577028258888	0	-0.182315405651778	0	0	0	0	0	0	0	0	0	0.23094688221709	0.115473441108545	-0.0911577028258888	0	0	0	0	0	0	0	0	0	0	-0.0911577028258888	0	0	0.115473441108545	0	0	0	-0.273473108477666	0	0	-0.273473108477666	0	0
1323	0	0	0	0	0	0	0	-0.0062445360309729	0	0	0	0	0	0	0	-0.0124890720619458	0	0	0	0	0	0	0	-0.0062445360309729	0	0	0	-0.0124890720619458	0	0	0	0	0	0	0	0	0	0	0	0	0	0	0	0	0	0	0	0	0
1324	0	0	0	0	0	0	0	0	0	0	0	0	0	0	0	0	0	0	0	0	0	0	0	0	0	0	0	0	0	0	0	0	0	0	0	0	0	0	0	0	0	0	0	0	0	0	0	0	0
1325	0	0	-0.0200561572402728	0.0439367311072056	0	-0.0200561572402728	0.131810193321617	0	0	0.0878734622144113	0.0238805738669328	0	0	0.131810193321617	0	0	-0.0200561572402728	0	0	0	0	0	-0.0200561572402728	0	0	0	0	0	0	0.0439367311072056	-0.0401123144805455	0	0	0	0	0	0	0	0	0	0	0	0	0	0	0	0	-0.0200561572402728	-0.0802246289610911
1326	0.0143513203214696	0	0	0	0	0	0	0	0	0	0	0	0	0	0	0	0	0	0	0	0	0	0	0	0	0	0	0	0	0	0	0	0	0	0	0	0	0	0	0	0	0	0	0.0143513203214696	0	0	0	0	0
1327	0	0	0	0	0	0	0	0	0	0	0	0	0	0	0	0	0	0	0	0	0	0	0	0	0	0	0	0	0	0	0	0	0	0	0	0	0	0	0	0	0	0	0	0	0	0	0	0	0
1328	0	0	-0.00181475029036005	0	0	0	0	0	0	0	0	0	0	0	0	0	0	0	0	0	0	0	0	0	0	0	0	0	0	0	0	0	0	0	0	0	0	0	0	0	0	0	-0.00362950058072009	0	0	0	0.00411285679032656	0	0
1329	0.0453103760761214	0	0	0	0	0	0	0	0	0	0	0	0	0	0	0	0	0	0	0	0	0	0	0	0	0	0	0	0	0	0	0	0	0	0	0	0	-0.0181603559429765	0	-0.0181603559429765	0	0	0	0	0	0	0	0	0
1330	0	0	0	0	-0.0460935699469924	0.0415454923140839	-0.0230467849734962	0	0.0184987073405877	0	0	0	0	0.0830909846281678	-0.0230467849734962	0	-0.0460935699469924	0	0.124636476942252	-0.0460935699469924	0	0.0600441996546716	-0.0691403549204886	0.0830909846281678	0.0415454923140839	-0.0230467849734962	-0.115233924867481	-0.0230467849734962	0.0830909846281678	-0.0506416475799009	0.0369974146811754	0	-0.0230467849734962	0	0	0	0.124636476942252	0	-0.0230467849734962	0	0	-0.0691403549204886	0	-0.0045480776329085	0	0	0	0	0.0415454923140839
1331	0	0	0	0	0	0	0	0	0	0	0	0	0	0	0	0	0	0	0	0	0	0	0	0	0	0	0	0	0	0	0	0	0	0	0	0	0	0	0	0	0	0	0	0	0	0	0	0	0
1332	0	0	0	0	0	0	0	0	0	0	0	0	0	0	0	0	0	0	0	0	0	0	0	0	0	0	0	0	0	0	0	0	0	0	0	0	0	0	0	0	0	0	0	0	0	0	0	0	0
1333	0	0	0	0	-0.066711140760507	0.112233445566779	0	0	0	0	0	0	0	0	0	0	0	0	0	0	0	0	0	0	0	0	0	0	0	0	0	0	-0.066711140760507	0	0	0	0	0	0	0	0	0	0	0	0	0	0	0	0
1334	0	0	0	0	0	0	0	0	0	0	0	0	0	0	0	0	0	0	0	0.0662251655629139	0	-0.0255558395093279	0	0	0	0	0	0	0	0	-0.0255558395093279	0	0	0	0	0	0	0.0662251655629139	0	0	0	-0.0255558395093279	0	0	0	0.1068944916165	0	0	0
1335	0	0	0	0	-0.00171080544720454	0	0	-0.00171080544720454	0	0	0	0	0	0	0	0	0	0	0	0	0.00639226561672869	0	0	0	0	0	0	0	0	0	0	0	0	0	0	0	0	-0.00171080544720454	0	0	0	0	0	-0.00342161089440909	0.00810307106393323	0	0	0	0
1336	0	0	0	0	0	0	0	0	0	0	0	0	0	0	0	0	0	0	0	0	0	0	0	0	0	0	0	0	0	0	0	0	0	0.0263227165043432	0	0	0	0	0	0	0	0	0	0	0	0	0	0	0
1337	0	0	0	0	0	0	0	0	0	-0.00173034330011074	0	0	0	0	-0.00173034330011074	0	0	0	-0.00173034330011074	0	0	0	0	0	0	0	0	0	0	0	0	0	0	0	0	0	0	0	0	0	0	0	-0.00173034330011074	0	0	0	0	0	0
1338	0	0	0	0	0	0	0	0	0	0	0	0	0	0	0	0	0	0	0	0	0	0	0	0	0	0.0347584289190129	0	0	0	0	0	0	0	0	0	0	0	0	0	0	0	0	0	0	0.0695168578380257	0	0	0	0
1339	0	0	0	0	0	0	0	0	0	0	0	0	0	0	0	0	0.0489204529531143	0	0	0	0	0	0	0	0	0	0	0	0	0	0	0	0	0	0	0	-0.0500332181003207	0.217030417229231	-0.0297973778307509	0	-0.238379022646007	0	0	0	0	0	0	0	0
1340	0	0	0	0	0	0	0	0	0	0	-0.0200120072043226	0	0	0	0	0	0	-0.0200120072043226	0	0.0961538461538462	-0.0400240144086452	0	0	0	0.132271670694724	0	-0.0400240144086452	0	0	-0.0200120072043226	0	0	0	0	0	0	-0.0200120072043226	0	0	0	0	-0.0200120072043226	0	0	0	0	0	-0.0200120072043226	0
1341	0	0	0	0	0	0	0	0	0	0	0	0	0	0	0	0	0	0	0	0	0	0	0	0	0	0	0	0	0	-0.0224719101123595	0	0	0	0	-0.0224719101123595	0	0	0	0	0	0	0	0	0	0	0	0	-0.0224719101123595	0
1342	0.0907990314769976	0	0	0	0	0	0	0	0	-0.0099009900990099	0	0	0	0	0	0	0	0	0	0	0	-0.0099009900990099	0	0	0	0	0	0	0.0302663438256659	0	0	0	0	0	0	0	0	0	0	0	0	0	0	0	-0.0099009900990099	0	0	0	0
1343	0.0596543879439844	0.029008230802675	0.108506278026307	0.029069935855198	0.16094254604851	-0.0594692727864159	-0.102852038380131	-0.14993025100827	0.047041189596624	-0.046831392418047	0.19343642670703	-0.184173127099964	-0.00173665442267001	-0.074004240714015	0.052485632064222	-0.057720277353241	-0.00171197240166099	-0.066786120792234	-0.133572241584467	-0.126366462673191	0.047053530607129	0.023600811366592	0.117596803486308	-0.048654433914249	-0.252806971409409	0.059728434007012	0.00913988950201999	-0.119160683761915	0.036251032745466	-0.128127799116871	0.077884802906006	0.169971366455989	-0.102876720401141	-0.120983725258116	0.021740746838876	0.142823200181029	-0.1570126198145	0.085041217775265	0.106744941582627	-0.019769613216619	0.02538682983128	-0.196835689489343	-0.04323467346766	-0.037790231000063	-0.054098876381846	0.019979410395196	0.020016433426711	-0.025164691642198	0.023576129345583
1344	0	0	0	0	0	0	0	0	0	0	0	0	0	0	0	0	0	0	0	0	0	0	0	0	0	0	0	0	0	0	0	0	0	0	0	0	0	0	0	0	0	0	0	0	0	0	0	0	0
1345	0	0	0	0	0	0	0	0	0	0	0	0	0	0	0	0	0	0	0	0	0	0	0	0	0	0	0	0	0	0	0	0	0	0	0	0	0	0	0	0	0	0	0	0	0	0	0	0	0
1346	0	0	0	0	0	0	0	0	0	0	0	0	0	0	0	0	0	0	0	0	0	0	0	0	0	0	0	0	0	0	0	0	0	0	0	0	0	0	0	0	0	0	0	0	0	0	0	0	0
1347	0	0	-0.00854408749145591	0	0	-0.00854408749145591	0	0	0	0	0	0	0	0	0.0198394468782403	0	0	0	0	0	0.0123092072870507	0	0	-0.00854408749145591	0.0123092072870507	0	0	0.00376511979559479	0	0	-0.0256322624743677	-0.00854408749145591	0	0.0123092072870507	0	-0.00854408749145591	0	0	0	0	0.018825598977974	0	0	0.0123092072870507	0	0	-0.031715349875965	0.0075302395911896	0
1348	0	0	0	0	0	0	0	0	0	0	0	0	0	0	0	0	0	0	0	0	0	0	0	0	0	0	0	0	0	0	0	0	0	0	0	0	0	0	0	0	0	0	0	0	0	0	0	0	0
1349	0	0	0	0	0	0	0	0	0	0	0	0	0	0	0	0	0	0	0	0	0	0	0	0	0	0	0	0	0	0	-0.0255004462578095	0	0	0	0	0	-0.0255004462578095	0	0	0	0	0	0	0	0	0	0	0	0
1350	0	0	0	0	0	0	0	0	0	0	0	0	0	0	0	0	0	0	0	0	0	0	0	0	0	0	0	0	0	0	0	0	0	0	0	0	0	0	0	0	0	0	0	0	0	0	0	0	0
1351	-0.177462289263531	-0.354924578527063	0.286446719097294	-0.267358904271371	0.346766285894545	-0.384501626737652	-0.0591540964211772	-0.147885241052943	-0.062650507549399	0.29110860060159	0.055657685292955	-0.147885241052943	-0.325347530316474	-0.061485037173325	-0.0011654703760739	-0.0295770482105886	0.115977252090207	-0.325347530316474	-0.00233094075214699	0.114811781714132	-0.118308192842354	-0.0295770482105886	-0.092227555759988	0	-0.0295770482105886	0.0875656742556918	-0.0591540964211772	-0.266193433895297	-0.236616385684709	-0.208204807850194	-0.147885241052943	-0.41407867494824	-0.0591540964211772	0.175131348511384	-0.177462289263531	0.289943130225516	0.398927560059275	-0.245940148693301	-0.0591540964211772	0.173965878135309	-0.0591540964211772	-0.0307425185866622	0.114811781714132	-0.0307425185866622	-0.266193433895297	0.143223359548647	0.40825132306787	-0.354924578527063	-0.0898966150078392
1352	0	0.084530853761623	0	0	0	0	0	0	0	0	0	0	0	0	0	0	0	0	0	0	0	-0.0341296928327645	0.084530853761623	-0.136518771331058	-0.0341296928327645	0	-0.068259385665529	0	0	-0.0341296928327645	0	0	0	0	0	0	0	0	0	0	0	0	0	0	0	0	0	0	0
1353	0	0	0	0	0	0	0	0	0	0	0	0	0	0	0	0	0	0	0	0	0	0	0	0	0	0	0	0	0	0	0	0	0	0	0	0	0	0	0	0	0	0	0	0	0	0	0	0	0
1354	-0.0133244503664224	-0.00444148345547413	0	0.00602643238248257	0	-0.00444148345547413	0	0	0	0.0104679158379567	0	0	0.0225207806029217	0	0	0	0	0	0	0	0	-0.00444148345547413	-0.00888296691094826	0	0.0104679158379567	-0.00444148345547413	0	-0.0177659338218965	0.0209358316759133	0	0	0	0	0	0	-0.00444148345547413	0	0	0.0104679158379567	0	0	0	0	0	0	0	0	0	0
1355	0	0	0	0	0	0	0	0	-0.0129794276072425	0	0	-0.0129794276072425	0	0	0	0	0	0	-0.00648971380362126	0	0.0104471374843293	0	0	0	0	0	-0.0227906111062194	0	0	0.0144045611650373	0	0	0	0	0	0.029927804713691	0	-0.106049733988177	0	-0.0166188742952741	-0.00648971380362126	-0.0519177104289701	0	0	-0.0764514320856603	0	-0.0090220039265345	0	0
1356	0	0	0	0	0	0	0	0	0	0	0	0	0	0	0	0	0	0	0	0	0	0	0	0	0	0	0	0	0	0	0	0	0	0	0	0	0	0	0	0	0	0	0	0	0	0	0	0	0
1357	0	0	-0.0991080277502478	0	0	0	0	0	0	0	0	0	0	0	0	0	0.227790432801822	0	0.128682405051574	0	0	0	0	0	0	0	0	0	0	0	0	0	-0.0991080277502478	0	0	0	0	0	0	-0.198216055500496	0	0	0	-0.0991080277502478	0	0	0	0	0
1358	0	0	0	0	0	0	0	0	0	0	0	0	0	0	0	0	0	0	0	0	0	0	0	0	0	0	0	0	0	0	0	-0.00745323097562794	0	0	0	0	0	0	0	0	0	0	0	0	0	0	0	0	0
1359	0	0	0	0	0	0	0	0	0	0	0	0	0	0	0	0	0	0	0	-0.0161459594736417	0	0	-0.00807297973682086	0	0	0	0.0161707632600259	0	0	0	0	0	0	0	0	0	0	0.0323415265200517	0	0	0	0	0	0	-0.00807297973682086	0	0	0	0
1360	0	0	0	0	0	0	0	0	0	0	0	0	0	0	0	0	0	0	0	0	0	0	0	0	0	0	0	0	0	0	0	0	0	0	0	0	0	0	0	0	0	0	0	0	0	0	0	0	0
1361	0	0	0	0	0	0	0	0	0	0	0	0	0	0	0	0	0	0	0	0	0	0	0	0	0	0	0	0	0	0	0	0	0	0	0	0	0	0	0	0	0	0	0	0	0	0	0	0	0
1362	0	0	0	0	0	0	0	0	0	0	-0.01478633742422	0	0	0	0	0	0.0277315585135885	0	0	0	0	0	0	0	0	0	0	0	0	0	0	0	0	0	0	0	0	0	0	0	0	0.0277315585135885	0	0	0	0	0	0	0
1363	0	0	0	0	0	0	0.0457247370827618	0	0	0	0	0	0	0	0	0	0	0	0	0	0	0	0	0	0	0	0	0	0	0	0	0	0	0	0	0	0	0	0	0	0	0	0	0	0	0	0	0	0
1364	0	0	0	0	0	0	0	0	0	0	0	0	0	0	0	0	0	0	0	0	0	0	0	0	0	0	0	0	0	0	0	0	0	0	0	0	0	0	0	0	0	0	0	0	0	0	0	0	0
1365	0	0	0	0	0	0	0	0	0	0	0	0	0	0	0	0	0	-0.0118680275338239	0	0	0	0	0	0	0	0	-0.0118680275338239	0	0	0	0	0	0	0	0	0	0	0	0	0	0	0	0	0	0	0	0	0	0
1366	0	0	0	-0.00702148574638393	-0.0140429714927679	0	0	0	0	0	0	0	0	0	0	0	0	0	0	0	0	0	0	0	-0.0210644572391518	0	0	0	0	0	0	0	0	0	0	0	0	0	0	0	0	0	0	0	-0.00702148574638393	0	0	-0.0040705731488402	0
1367	0	-0.0044477787233195	0	-0.0376506024096386	0	0	0	0	0	0	0	0	0	0	0	0	0	0	0	0	0	0	0	0	0	0	0	0	0	0	0	0	0	0	0	0	0	0	0	0	0	0	0	0	0	0	0	0	0
1368	0	0	0	0	0	-0.0210084033613445	0	0	0	0	0	0	0.0291069486115926	0	0	0.0355618776671408	0	0	0	0	0	0	0	0	0	0	0	0	0	0	0	0	0	0	0	0	0	0	0	0	0	0	0	0	0	0.0355618776671408	0	0	0
1369	0	0	0	0	0	0	0	0	0	0	0	0	0	0	0	-0.00470101541933058	0	0	0	0	0	0	0	0	0	0	0	0	0	0	0	0	0	0	0	0	0	0	0	0	0	0	0	0	0	0	0	0	0
1370	0	0	0	0	0	0	0	0	0	0	0	0	0	0	0	0	0	0	-0.00763475339746526	0	0	0	0	0	0	0	0	0	0	0	0	0	0	0	0	0	0	-0.0158179772289012	0	0	0	0	0.0577872045758979	0	0.0147210363609598	0	0	0	0
1371	0	0	-0.00795102170628926	0	0	-0.00795102170628926	0	-0.00795102170628926	0	0	0	0	0	0	0.0120685493603669	-0.00795102170628926	0	0	0	0	0	-0.00795102170628926	0	0	-0.0238530651188678	0	-0.00795102170628926	-0.0159020434125785	0	0	0	-0.00795102170628926	0	0	0.0120685493603669	0	0	0	0	0	0	0	0	0	0	0	0	0	0
1372	0	0.0522193211488251	0	0	0	0	0	0	0	0	0	0	0	0	0	0	0	0	0	0	0	0	0	0	0	0	0	0	0	0	0	0	0	0	0	0	0	0	0	0	0	0	0	0	0	0	0	0	0
1373	0	0	-0.0489236790606654	0	0	0	0	0	0	0	0	0.0185391175380052	0	0	0.0133873471067003	0	0	0	0.0185391175380052	0	0	-0.00815394651011089	0	0	0	0	0	0	0	0	0	0	0	0	0	-0.0163078930202218	0	0	-0.00815394651011089	0	0	0	0	0	0	0	0	-0.00815394651011089	0
1374	0	0	0	0	0	0	0	0	0	0	0	-0.0043917435221783	0	0	0	0	0	0	0	0	0	0	0	0	0	0	0	0	0	0	0	0	0	0	0	0	0	0	0	0	0	0	0	0	0	0	0	0	0
1375	0	0	0	0	0	0	0	0	0	0	0	0	0	0	0	0	0	0	0	0	0	0	0	0	0	0	0	0	0	0	0	0	0	0	0	0	0	0	0	0	0	0	0	0	0	0	0	0	0
1376	0	0	0	0	0	0	0	0	0	0	0	-0.00173840483971907	0	0	-0.00173840483971907	0	-0.00173840483971907	0	0	0	0	0	0	0	0	0	0	0	0	0.00025467283856625	0	0	0	0	0	0	0	0	0	-0.00173840483971907	0	0	0	0	0	0	0	0	0
1377	0	0	0	0	0	0	0	0	0	0	0	0	0	0	0	-0.00992555831265509	0	0	0	0	0	-0.0198511166253102	0	0	0	0	0	0	0	-0.00992555831265509	0	0	0	0	0	0	0	0	0	0	0	0	0	0	0	0	0	0	0
1378	0	0	0	0	0	-0.00541565123206066	0	0	0	0	0	0	0	0	0	0	0	0	0	0	0	0	0	0	0	0	0	0	0	0	0	0	0	0	0	0	0	-0.00541565123206066	0	0	0	0	0	0	0	0	0	0	0
1379	0	-0.0044907490569427	0	0	0	0	0	0	0	0	0	0	0	0	0	0	0	0	0	0	0	0	0	0	0	0	0	0	0	0	0	-0.0044907490569427	0	0	0	0	0	0	0	0	0	0	0	0	0	0	0	0	0
1380	0	0	0	0	0	0	0	0	0	0	0	0	0	0	0	0	0	0	0	0	0	0	0	0	0	0	0	0	0	0	0	0	0	0	0	0	0	0	0	0	0	0	0	0	0	0	0	0	0
1381	0	0	0	0	0	0	0	0	0	0	0	0	0	0	0	0	0	0	0	0	0	0	0	0	0	0	0	0	0	0	0	0	0	0	0	0	0	0	0	0	0	0	0	0	0	0	0	0	0
1382	0	0	0	0	0	0	0	0	0	0	0	0	0	0	0	0	0	0	0	0	0	0	0	0	0	0	0	0	0	0	0	0	0	0	0	0	0	0	0	0	0	0	0	0	0	0	0	0	0
1383	0	0	0	0.00580618939789816	0	0	0.00580618939789816	0	0	0	0	0	0	0	0	0	-0.00572540936676972	-0.00286270468338486	-0.00278192465225643	0	0.00580618939789816	0	-0.00286270468338486	0	0	0	0	-0.00572540936676972	0	-0.00286270468338486	0	0.00580618939789816	0	0	0	-0.00286270468338486	-0.00572540936676972	0	0	0	0	0	0.0029434847145133	0	0	0	0	0	0
1384	0	0	0	0	0	0.0683060109289618	0	0	0	0	0	0	0	0	0	0	0.0932656846234203	0	0	-0.0433463372345037	0	0	0	0	0	0	0.0683060109289618	0	0	0	-0.0866926744690074	0	0	0	0	0	0	0	0	0	0	0	0	0	-0.0866926744690074	0	0	0	0
1385	0	0	0	0	0	0	0	0	0	0	0	0	0	0	0	0	0	0	0	0	0	0	0	0	0	0	0	0	0	0	0	0	0	0	0	0	0	0	0	0	0	0	0	0	0	0	0	0	0
1386	0	0	0	0	0	0	0	0	0	0	0	0	0	0	0	0	0	0	0	0	-0.0142694063926941	0.0013449644973834	-0.0142694063926941	0	0	0	0	0	0	0	0	0	0	0	0	0	0	0	0	0	0	0	0	0	0	0	0	0	0
1387	0	0	0	0	0	0	0	0	0	0	0	0	0	0	0	0	-0.0525486074619023	0	0	0.0342583076396026	-0.0175162024873008	0	0	0	0	0	0	0	0	0	0	0	0	0	0	0	0	0	0	-0.0175162024873008	0	0	0	0	0	0	0	0	0
1388	0	0	0	0	0	0	0	0	0	0	0	0	0	0	0	0	0	0	0	0	0	0	0	0	0	0	0	0	0	0	0	0	0	0	0	0	0	0	0	0	0	0	0	0	0	0	0	0	0
1389	0	0	0.00991375037176564	0	0	-0.00320965464116061	0	0	0	0	0	0	0	-0.00962896392348183	0	0	0	0.0396550014870626	0	0.0265315964741363	0	0	0	0	0.00028478644828381	0	0	0	0	0	0	0	0	0.00463358688257959	0	-0.0256772371292849	0	0	0	0	0	0	0	0	0	0	0	0	0
1390	0	0	0	0	0	0	0	0	0	0	0	0	0	0	0	0	0	0	0	0	0	0	0	0	0	0	0	0	0	0	0	0	0	0	0	0	0	0	0	0	0	0	0	0	0	0	0	0	0
1391	0	0	0	0	0	0	0	0	0	0	0	0	0	0	0	0	-0.00296142740801066	0	0	0	0	0	0	0	0	0	0	0	0	0	0	0	0	0	0	0	0	-0.00148071370400533	0	-0.00148071370400533	0	0	0	0	0	0	0	0	0
1392	0	-0.0171880371261602	0	-0.0171880371261602	0	0	0	0	0	0	0	0	0	0	0	0	-0.0171880371261602	0	0	0.0395726157499011	-0.0171880371261602	0	0	0	0	0	-0.0171880371261602	0	0	0	0	0	0	0	0	0.0395726157499011	0	0	0	0	0	-0.0171880371261602	0	0	0	0	0	0	0
1393	0	0	-0.0653310104529617	0	0	-0.461274815041533	0.0865426222414539	0	0.0865426222414539	1.36149147313937	0.043271311120727	0.129813933362181	0.259627866724362	-0.087390709785196	0.474005551392597	0	0.0214943076364064	0	4.25303653033439	0.0427059194248988	0.043271311120727	0.0212116117884922	-0.108885017421603	1.70795408114803	-0.088238797328939	-0.0217770034843206	-0.0435540069686411	0	0	-0.5902218144701	-0.110581192509087	-0.0438367028165552	-6.05201867451078	-0.087390709785196	-0.044402094512383	-0.43751894062181	-0.500871080139373	0.129813933362181	0	-0.0220596993322347	0	-1.20169293350843	-0.0217770034843206	0	-0.588827181620397	0	0	-0.152439024390244	0
1394	0	0	0	0	0	0	0	0	0	0	0	0	0	0	0	0	0	0	0	0	0	0	0	0	0	0	0	0	0	0	0	0	0	0	0	0	0	0	0	0	0	0	0	0	0	0	0	0	0
1395	0	0	0	0	0	0	0	0	0	0	0	0	0	0	0	0	0	0	0	0	0	0	0	0	0	0	0	0	0	0	0	0	0	0	0.0343046233931484	0	0.0725163161711385	0	0.0725163161711385	0	0.175430186350584	0	0	-0.0382116927779901	-0.0764233855559801	0	0	0	0.0725163161711385
1396	0	0	0	0	0	0	0	0	0	0	0	0	0	0	0	0	0	0	0	0	0	0	0	0	0	0	0	0	0	0	0	0	0	0	0	0	0	0	0	0	0	0	0	0	0	0	0	0	0
1397	-0.0116904372223521	0	0	0	0.0245278390973755	0	0	0	-0.0116904372223521	0.049055678194751	0.0245278390973755	0	0	0	0	0	0	0	0	0	0	0	0	0	0	0	0.049055678194751	0	0	0	0	0	0	0	0	0	0	-0.0116904372223521	0	0	0	0	0	0	0	-0.0116904372223521	0	0	0.0245278390973755
1398	0	0	0	0.0160822359068616	0	0	-0.0123107226394189	0	-0.0123107226394189	0	0.238458208172572	0.0444751944531421	0	0	0.0605574303600037	0	0	0	0	0	0	0	-0.0492428905576757	0	0	0	0	0	0	-0.0123107226394189	0.056785917092561	0.0037715132674426	0	0	0	0	0.0283929585462805	0	0	-0.135417949033608	0	-0.0246214452788379	0.056785917092561	0.0359359850811659	0	0	-0.0123107226394189	0	-0.0492428905576757
1399	-0.0153350713080816	0	0	-0.0766753565404079	-0.0613402852323263	-0.000631091850167402	0	0.0287768670656611	-0.0306701426161632	-0.0460052139242447	-0.0766753565404079	-0.0306701426161632	0	-0.0159661631582489	0	0	0	0	0	0	0.0300390507659958	0.0600781015319916	-0.0306701426161632	0	-0.0613402852323263	-0.0153350713080816	0	0	0	0	0	0	0	0	0	0	0	0	0	0	0	0	0	0	0	0	0	0	0
1400	0	0	0	0	0	0	0	0	0	0	0	0	0	0	0	0	0	0	0	0	0	0	0	0	0	0	0	0	0	0	0	0	0	0	0	0	0	0	0	0	0	0	0	0	0	0	0	0	0
1401	0	-0.0674763832658569	0	0	0	0	0	0	0	0	0	0	0	0	0	0	0	0	0	0	0	0	0	0	0	0	0	0	0	0	0	0	0	0	0	0	0	0	0	0	-0.0674763832658569	0	0	0	0	0	0	0	0
1402	0	0	0	0	0	0	0	0	0	0	0	0	0	0	0	0	0	0	0	0	0	0	0	0	0	0	0	0	0	0	0	0	0	0	0	0	0	0	0	0	0	0	0	0	0	0	0	0	0
1403	0	0	0	0	0	0	0	0	0	0	0	0	0	0	0	0	0	0	0	0	0	0	0	0	0	0	0	0	0	0	0	0	0	0	0	0	0	0	0	0	0	0	0	0	0	0	0	0	0
1404	0	-0.069272919376986	-0.0128024580719498	0	0	0	0	-0.0010521258034475	0	0	0.0363031226089545	0	0	0	0	0.070501993611014	0	0.095054783951466	0	0.396001022857576	0	-0.0384073742158494	0	0	0	0.0245527903404521	0.123816077505708	0	0	-0.0256049161438996	0	0	0.0608559129494067	-0.0256049161438996	0	0.15275431949053	-0.0128024580719498	0	-0.0640122903597491	0	0	0	0	0	0	0	0	0	0
1405	0	0	0	0	0	0	0	0	0	0	0	0	0	0	0	0	0	0	0	0	0	-0.0540832882639264	0	0.0960516975633611	0	0	0	-0.0216333153055706	0	0	0	0	0	0	0	0	0	-0.0108166576527853	0	0	0	0	0	0	0	0	0	0	0
1406	0	0	0	0	0	0	0	0	0	0	0	0	0	0	0	0	0	0	0	0	0	0	0	0	0	0	0	0	0	0	0	0	0	0	0	0	0	0	0	0	0	0	0	0	0	0	0	0	0
1407	0	0	0	0	0	0	0	0	0	0	0	0	0	0	0	0	0	0	0.0112394785287903	0	-0.0251683130938149	0	0	0	0	0	0	0	0	0	0	0	0	0	-0.00629207827345372	0	0	0	0	0	0	0	0	0	0	0	0	0	0
1408	0	0	0	0	0	0	0	0	0	0	0	0	0	0	0	0	0	0	0	0	0	0	0	0	0	0.0390930414386239	0	0	0	0	0	0	0	0	0	0	0	0	0	0	0	0	0	0	0	0	0	0	0
1409	-0.0797766254487435	-0.0120641613609884	0	-0.0361924840829648	0	0.0556483027267668	-0.0398883127243718	-0.195745734980452	0	-0.119664938173115	-0.0797766254487435	0	0	-0.371058975880335	-0.159553250897487	-0.478659752692461	0	0	-0.119664938173115	0	-0.199441563621859	-0.239329876346231	-0.518548065416833	-1.67161330578221	-1.73932576986996	-0.199441563621859	0	-0.0398883127243718	0	-0.171617412258476	0	-0.410947288604706	0	0	0	-1.22077770445313	0	0	0	0	0	0.0278241513633834	0	-0.523220569495008	0	-0.0398883127243718	0	-0.499092246773031	0
1410	0	0	0	0	0	0	0	0	0	0	0	0	0	0	0	0	0	0	0	0	0	0	0	0	0	0	0	0	0	0	0	0	0	0	0	0	0	0	0	0	0	0	0	0	0	0	0	0	0
1411	0	0	0	0	0	0	0	0	-0.0934288383681096	0	0	0	-0.0311429461227032	0	0	0	0	0	0	0	0	0	0	0	0	0	0	0	0	0	0	0	0	0	0	0	0	0	0	0	0	0	0	0	0	0	0	0	0
1412	0	0	0	0	0	0	0	0	0	0	0	0	0	0	0	0	0	0	0	0	0	0	0	0	0	0	0	0	0	0.0829875518672199	0	0	0	0	0	0	0	0	0	0	0	0	0	0	0	0	0	0	0
1413	-0.00171839021204935	0	0	-0.0034367804240987	-0.00171839021204935	0	0.0043323802096872	0	0	-0.00171839021204935	0	-0.00171839021204935	0	0	0	0	0	-0.00171839021204935	0	0	-0.00171839021204935	0	0	0	0	-0.00171839021204935	0	0.0043323802096872	0	0	-0.00171839021204935	0	0	0	0	-0.00171839021204935	-0.00515517063614806	-0.00171839021204935	-0.0034367804240987	0	0	0	0	-0.00171839021204935	0	0	0	0	0
1414	3.91471399999762	0.419979678210539	-0.14095412350073	-0.0804533212307904	-1.9173358205488	-1.21755631077329	-1.37442480163622	-1.2012012012012	-0.3630405494745	-0.121239843572251	0	0.0096367688592996	-0.0600600600600601	-3.46755124819385	-1.19848527623221	-1.08844266718127	-0.017254461919277	-0.0708165523714907	0.351622943848251	0.0589403366079289	0.00425852270358419	0.387930572381188	0.072835628170813	12.4121821146811	0.95895975308907	0.185338055230955	0.075974427422266	-0.300520671405241	-0.68865374696394	-0.27875157982259	-0.205951687506626	-0.045045045045045	-0.015015015015015	-0.157767843210128	-0.015015015015015	0.0342885527336143	-4.46656493859988	-0.141633104742981	-0.225225225225225	-1.04701289945241	-0.0600600600600601	-0.03003003003003	0.77855920180394	0.0643185827636443	0	0	0	-0.015015015015015	0.201472793698101
1415	0	0	0	0	0	0	0	0	0	0	0	0.0482539765557277	0	0	0	0	0	-0.119646513159871	0	0	0	0	0	0	0	0	0	0	0	0	0	0	0	0	0	0	0	0	0	0	0	0	0	0	0	0	0	0	0
1416	0	0	0	-0.0041576584067853	0	0	0	0	0	0	0	0	0	0	0	0	0	0	0	0	0	0	0	0	0	0.0316436933391344	0	0	0.0649049605934168	0	-0.0041576584067853	0.00927213722763097	-0.0041576584067853	0	0	0.0019136408281207	0	0	-0.0124729752203559	0	0	0	0	0	0	0	0	0	0
1417	0	0	0	0	0	0	0	0	0	0	0	0	0	0	0	0	0	0	0	0	0	0	0	0	0	0	0	0	0	0	0	0	0	0	0	0	0	0	0	0	0	0	0	0	0	0	0	0	0
1418	0	0	0	0	0	0	0	0	0	0	0	0	0	0	0	0	0	0	0	0	0	0	0	0	0	0	0	-0.00446647907454554	0	0	0	0	0	0	0	0	-0.00446647907454554	0	0	0	0	0	0.0207490403568835	0	0	0	0	0.0103745201784417	0
1419	0	0	0	0	0	0	0	0	0	0	0	0	0	0.00241919876137023	0	0	0	0	0.00426609578237088	0	0	0	0	0	0	0	0	0	0	0	0	0	0	0	0	0	0	0	0	0	0	0	0	0	0	0	0	0	0
1420	0	0	0	0	0	0	0	0	0	0	0	0.000945894816496406	0	0	0	0	0	0	0	0	0	0	0	0	0	0	0	0	0	0	0	0	0	0	0	0	0	0	0	-0.00198878326240006	-0.00795513304960025	0	0	-0.00397756652480013	0	0	0	0	-0.00218277052121457
1421	0	0	0	0	0	0	0	0	0	0	0	0	0	0	0	0	0	0	0	0	0	0	0	0	0	0	0	0	0	0	0	0	0	0	0	0	0	0	0	0	0	0	0	0	0	0	0	0	0
1422	0	0	0	0	0	0	0	0	0	0	0	0	-0.0424929178470255	0	0	0	0	0	0	0	0	0	0	0	0	0	0	0	0	0	0	0	0	0	0.0228571428571429	0	0	0	0	0	0	0	0	0	0	0	0	0	0
1423	0	0	0	0	0	0	0	0	0	0	0	0	0	0	0	0	0	0	0	0	0	0	0	0	0	0	0	0	0	0	0	0	0	0	0	0	0	0	0	0	0	0	0	0	0	0	0	0	0
1424	-0.0237699072973615	0.0542593597395551	0	0.10851871947911	-0.0713097218920846	-0.0950796291894462	0	-0.0170503621525295	0.10851871947911	-0.0237699072973615	0.169497624363497	0	-0.0237699072973615	-0.0950796291894462	-0.0475398145947231	0	-0.0713097218920846	-0.0475398145947231	-0.0237699072973615	-0.193770530241758	-0.166389351081531	-0.237699072973615	-0.0883600840446139	-0.118849536486808	-0.0237699072973615	-0.0170503621525295	0.10851871947911	-0.0645901767472529	0	0.0304894524421936	-0.0475398145947231	0.0372089975870254	0	0.0304894524421936	0	-0.0237699072973615	0	0	-0.0237699072973615	0	0	-0.0237699072973615	0	-0.0237699072973615	0.0542593597395551	0	-0.0475398145947231	0.0914683573265804	-0.305900521583734
1425	2.36036777823521	0.0803053636867281	-0.192122958693564	0.17636684303351	0	0	0	0.128336103360119	-0.50165439214431	0	-0.048030739673391	-2.88819765284703	-0.144092219020173	0	0	0	-0.144092219020173	0	-0.584246933910719	-0.240153698366955	0	0	-0.720461095100865	0	0	-0.0960614793467819	0	0	0	0	0	0	0.072427305856701	0	0	-0.144092219020173	0	0	0	0	-0.111817595006836	0	0	0.17636684303351	0	0	0	0	0
1426	0	0	0	0	0	0	0.0123685837971552	-0.0249045326249377	0	0	0	0	0	0	0	0	0	0	0	0	0	0	0.0123685837971552	0	0	0	0	0	0	0	0	0	0	0.0123685837971552	0	0	0	0	0	0	0	0	-0.00830151087497925	0	0	0	0	0	0
1427	0	0.0132890409931767	0	0	0.020463561025597	0	0	-0.00411725955204216	0.00564588979223126	0	-0.00823451910408432	0	0	0	0	0	0	0	-0.0314094461761481	0	0	0	0	0	0	0	0	0	0	0	-0.00411725955204216	0	0	-0.00411725955204216	0	0	0	0	0	0	0	0	0	0	0	0	0	0	0
1428	0	0	0	0	0	0	0	0	0	0.126342387871131	0	0	0	-0.0373831775700935	0	0	0	0	0.0631711939355654	0	0	0	0	0	0	0	0	-0.0373831775700935	0	0	0	0	0	0	0	0	0	0	0	0	0	0	0	0	0	0	0	0	0
1429	0	0	0	0	0	0	0	0	0	0	0	0	0	0	0	0	0	0	0	0	0	0	0	0	0	0	0	0	0	0	0	0	0	0	0	0	0	0	0.0263019463440295	0	0.0263019463440295	0	0.0263019463440295	0	0	0	0	0	0
1430	0	0	0	0	0	0	0	0	0	0	0	0	0	0	0	0	0	0	0	0	0	0	0	0.00546104906752587	0	0	0	0	0	0	0	0	0	0	0	0	0	0	0	0	0	0	0	0	0	0	0	0	0
1431	0	0	0	0	0	0	0	0	0	0	0	0	0	0	0	0	0	0	0	0	0	0	0	0	0	0	0	0	0	0	0	0	0	0	0	0	0	0	0	0	0	0	0	0	0	0	0	0	0
1432	0	0	0	0	0	0	0	0	0	0	0	0	0	0	0	0.0588072332257177	0	0	0	0	0	-0.0161890885543144	0	0	0	-0.0161890885543144	0	0	0	0	0.0303951367781155	0	0	0	0	0	0	0	0	0.0303951367781155	-0.153309192400675	0	-0.0323781771086288	0	0	0	0	0	0
1433	0	0	0	0	0	0	0	0	0	0	0	0	0	0	0	0	0	0	0	0	0	0	0	0	0	0	0	0	0	0	0	0	0	0	0	0	0	0	0	0	0	0	0	0	0	0	0	0	0
1434	0	0	0	0	0	0	0	0	0	0	0	0	0	0	0	0	0	0	0	0	0	0	-0.00397180021844901	0	0	0	-0.00198590010922451	0	0	0	0	0	0	0	0.0124131082423039	0	0	0	0	0	0	0	0.00413770274743462	0	0	0	0	0	0
1435	0	0	0	0	0	0	0	0	0	0	0	0	0	0.252525252525253	0	-0.0619578686493185	0	0	0	0	0	0	0	0	-0.0619578686493185	0.126262626262626	0	0	0	0	0	0	0	0	-0.0619578686493185	0	-0.0619578686493185	0	0	0	0	-0.123915737298637	0	0.126262626262626	0	0	-0.185873605947955	0	0
1436	-0.0337495781302734	0	0	0.00127663466104889	0	-0.0337495781302734	0	0	0	-0.0337495781302734	0	0	-0.0662225215994974	0	0	-0.0337495781302734	0	-0.0337495781302734	0	0	0	0	0	0	0	-0.0337495781302734	0	0	0	0	0	0	-0.0337495781302734	-0.134998312521093	0	-0.0324729434692244	-0.0674991562605467	-0.0337495781302734	0	0	0	-0.0337495781302734	0	0	0	0	-0.0337495781302734	0	0
1437	0	0	0	0	0	0	0	0	0	0	0	0	0	0	0	0	0	0	0	0	0	0	0	0	0	0	0	0	0	0	0	0	0	0	0	0	0	0	0	0	0	0	0	0	0	0	0	0	0
1438	0	0	0	0	0	0	0	0	0	0	0	0	0	0	0	0	0	0	0	0	0	0	0	0	0	0	0	0	0	0	0	0	0	0	0	0	0	0	0	0	0	0	0	0	0	0	0	0	0
1439	0	0	0	0	0	0	0	0	0	0	0	0	0	0	0	0	0	0	0	0	0	0	0	0	0	0	0	0	0	0.0448631673396142	0	0	0	0	0	0	0	0	0	0	0	0	0	0	0	0	0	0	0
1440	-0.0193600132754377	0.0113298399660105	-0.0138285809110269	0	-0.0136950932924325	-0.0137618371017297	-0.0163273218560433	-0.0410852798772973	-0.00539794474581626	-0.0439177398687999	-0.0248914456398484	-0.03595431036867	-0.0215917789832651	-0.0024319971357192	-0.0358208227500755	-0.038052588457903	-0.0466167122417081	-0.0924992425811467	-0.0590436731574933	-0.0466167122417081	-0.0373851503649306	-0.129321222470681	-0.0383863075043892	-0.0519479131782271	0.00863086759310234	-0.0110628647288215	0.00849737997450786	-0.00829714854661615	-0.00276571618220538	0.00303269141939435	-0.0165942970932323	0.000467206665080599	-0.0163273218560433	0.00586515141089695	-0.0109293771102271	-0.0221257294576431	-0.0163940656653405	-0.0078299418815355	-0.0022317657078274	0.0003337190464862	0.000200231427891709	-0.00823040473731888	0.00566491998300524	-0.0077631980722382	-0.0220589856483458	0.00586515141089695	-0.0109961209195243	-0.0331885941864646	-0.024757958021254
1441	0	0	0	0	0	0	0	0	0	0	0	0	0	0	0	0	0	0	0	0	0	0	0	0	0	0	0	0	0	0	0	0	0	0	0	0	0	0	0	0	0	0	0	0	0	0	0	0	0
1442	0	0	0	0	0	0	-0.014801657785672	0	0	0	0	0	0	0	0	0	0	0	0	0	0	0	0	0	0	0	0	0	0	0	0	0	0	0	0	0	0	0	0	0	0	0	0	0	0	0	0	0	0
1443	-0.00014232028148681	0	0	0	0	0.0018327474272017	0.00211738799017532	0	0	-0.00112985413583106	0	0	0	-0.00112985413583106	0	-0.0165295593090689	0	0	0	0	0	0	0	0	0	0	0	0	0	0	0	0	0	0	0	0	0	0	0	0	0	0	0	0	0	0	0	0	0
1444	0	0	0	0	0	0	0	0	0	0	0	0	0	0	0	0	0	0	0	0	0	0	0	0	0	0	0	0	0	0	0	0	0	0	0	0	0	0	0	0	0	0	0	0	0	0	0.0147732309055991	0	0
1445	0	0	0	0	-0.0125667609173735	0.0126951885235496	-0.056550424128181	0	-0.0687319022270263	0	0	-0.0120530504926694	0	-0.0248766666223951	0	0.032059040324314	0	-0.0374434275397686	-0.00628338045868677	0.0126951885235496	0	0	-0.0814270907505759	0	0	0	0	0.00641180806486283	0	0	0	0	0	0	0	0	0	0	-0.154515959343649	-0.00628338045868677	-0.0125667609173735	-0.0941222792741254	0	0	-0.025005094228571	-0.00628338045868677	0	-0.0691171850455545	-0.0879673264216148
1446	-0.0567869830343532	0	0	0.03355318276202	0	0	0	0	0.126462801248341	-0.0077435341489856	0	0	0	0	-0.0077435341489856	0	0	0.0206483584555028	0	0	0	0	-0.0077435341489856	-0.0154870682979712	0	0	0	0	0.0206483584555028	0	-0.0309741365959424	0	0	-0.0154870682979712	-0.0077435341489856	0	-0.157459322621918	0	0	-0.0077435341489856	-0.0542047390428992	-1.89201097199469	-0.077435341489856	0	0	0	0	0	-0.0154870682979712
1447	0	0	0	-0.295044812720068	0.122100122100122	0	-0.057648230206649	0	0	0	0	0	0	-0.0599161174355902	0	-0.0599161174355902	0	-0.057648230206649	0	0	0	-0.0599161174355902	0	0	0	0	0	0	0	0	0	0	0	0.122100122100122	0	-0.179748352306771	0	0	0	0	0	0	0	0	0	0	0	0	-0.11983223487118
1448	0	-0.00517794884186544	0	0	0	0	0	0	0	0	0	0	0.00188230167420246	0	0	0	0	0	0	0	0.00360828462149094	0	-0.0015696642203745	-0.00345196589457696	0	-0.00172598294728848	0	-0.00172598294728848	0	0	-0.00172598294728848	0	0.00360828462149094	-0.00690393178915392	0	0	0.00188230167420246	0	0	0	0	-0.00172598294728848	0	0	0.00360828462149094	0	0.00360828462149094	0	0
1449	0.00696214908846189	0	0	0	0	0	0	-0.00294031167303734	0	0	0	0	0	0	0	0	0	-0.00588062334607468	0	0	0	0	0	0	0	0	0.0010815257423872	0	0	0.0139242981769238	0	0	-0.00422375910134298	0.0218158402307108	-0.0126906396574745	0	0	0	0	-0.0257021411720254	-0.0046469648266253	0	0.0198049215229985	-0.092568645766574	0.0148536911422488	0	-0.00882093501911203	0	0
1450	0	0	0.0108683838713183	0	0	0	-0.00522739153162572	0	0	0	0	0	0	0	0.0108683838713183	0	0	0	0	0	0	0	0	0	0	0	0	0	0	0	0	0	0	0	0	0	0	0	0	0	0	0	0	0	0	0	0	0	0
1451	0	0	0	0	0	0	0	0	0	0	0	0	0	0	0	0	0	0	0	0	0	-0.0150738619234248	0	0	0	0	0	0	0	0	0	0	0	0	0	0	-0.0150738619234248	0	0	-0.0301477238468496	0	0	0	0	0	0	0	0	0
1452	0	0	0	0	0	0	0	0	0	0	0	0	0	0.121359223300971	0	0	0.242718446601942	0	0	0	0	0	0.0444361463778941	0	0	-0.0769230769230769	0	0	0	0	0.121359223300971	0	0	0	0	0	0	0	0	0	0	0.121359223300971	0	0	0	0	0	0	0
1453	-0.0294117647058824	-0.00735294117647059	0	0	0	0	0	0	0	0	0	0	0	0	0	0	0	0	0	0	0	0	0	0	0.0109481059776659	0	0	0	0	0.0109481059776659	0	0	0	0	0	0	0.0145432707788611	0	0	0	0.00359516480119531	0	0	0	0	0	0	0	0
1454	0	0	0	0	0	0	0	0	0	0	0	0	0	0	0	0	0	0	0	0	0	0	0	0	0	0	0	0	0	0	0	0	0	0	0	0	0	0	0	0	0	0	0	0	0	0	0	0	0
1455	0	0	0	0.00134901791495791	0.00171286432288262	-0.000920801834237254	0	-0.000920801834237254	0	0	0	0	0	0	0	0	0	0	0	0	-0.00184160366847451	0	0	0	0	0	0	0	0	0	0	0	0	0	0	0	0	0	0	0	0	0	0	0	0	0	0	0	0
1456	0	0	0	0	0	0	0	0	0	0	0	0	0	0.00683340166735001	0	0	0	0	0	0	0	0	0	0	0	0	-0.00410399523936552	0	0	0	0	0	0	0	0	-0.00410399523936552	0	0	0	0	0	0	0	0	0	0	0	0	0
1457	0	0	0	0	0	0	0	0	0	0	0	0	0	0	0	0	0	0	0	0	0	0	0	0	0	0	0	0	0	0	0	0	0	0	0	0	0	0	0	0	0	0	0	0	0	0	0	0	0
1458	0	0	0	0	0	0	0	0	0	0	0	0	0	0.0216044063329167	0	0	-0.028386873057858	-0.00717257208434945	0	0.0143884892086331	-0.00717257208434945	0	0	0.0143884892086331	0	0	0	0.0143884892086331	0	0	0.0647698739588161	0	-0.0429920874661625	0	0	0.129886508237106	0	0	0	0	0	0.00721591712428365	0	0	0	0.0143884892086331	0	0	0.0287769784172662
1459	0	0	0	0	0	0	0	0	0	0	0	0	0	0	0	0	0	0	0	0	0	0	0	0	0	0	0	0	0	0	0	0	0	0	0	0	0	0	0	0	0	0	0	0	0	0	0	0	0
1460	0	0	0	0	0	0	0	0	0	0	0	0	0	0	0	0	0	0	0	0	0	0	0	0	0	0	0	0	0	0	0	0	0	0	0	0	0	0	0	0	0	0	0	-0.0163786749651953	0	0	0	0	0
1461	0	-0.00871915598570058	0	0	0.0030367085036193	0	0	0	0	0	0.0409500409500409	0	0	0	0.000390969525157298	0	-0.0056824474820813	0	0.0030367085036193	0	-0.00871915598570058	0	0	0	0	0.0322308849643403	0	0	0	0	0	0	0	0	0	0	0	0	0	0	0	0	0	0	0	0	0	0	0
1462	0	0	0	0	0	0	0	0	0	0	0	0	0	0	0	0	0	0	0	0	0	0	0	0	0	0	0	0	0	0	0	0	0	0	0	0	0	0	0	0	0	0	0	0	0	0	-0.114600045840018	0	-0.114600045840018
1463	-0.00599304806424548	-0.0239721922569819	0.0217976876552928	0	-0.0028993394689188	-0.011986096128491	-0.030690075188457	-0.011986096128491	-0.0239721922569819	-0.0007248348672297	0	0.0277907357195383	0	0	-0.00599304806424548	0.0112612612612613	0	0	0	-0.00599304806424548	0.0225225225225225	0	-0.0239721922569819	0	0.0112612612612613	-0.00599304806424548	0.0225225225225225	0	-0.0239721922569819	0.0337837837837838	-0.011986096128491	0	-0.00599304806424548	-0.0007248348672297	-0.0014496697344594	0	-0.00599304806424548	0	0	-0.00599304806424548	0	0	-0.0067178829314751	0	-0.0239721922569819	0	-0.011986096128491	0	-0.00599304806424548
1464	0	0	0	0.0212765957446809	0	0	0	0	0.0212765957446809	0	0	-0.0154918667699458	0	0	0	0	0	0	-0.0154918667699458	0	0	-0.0154918667699458	0	0	0	0	0	0	0	0	0	0	0	0	0	0	0	0	0	0	0	0	0	0	0	0	-0.0154918667699458	0	0
1465	0	0	0	0	0	0	0	4.95135602168999e-05	0	0	0	0	0	0	0	0	0	0.0101812258195887	0	0	0	0	0	0	0	0	0	0	0	0	0	0	0	0	0	0	0	0	0	0	0	0	0	0	0	0	0	0	0
1466	-0.0384837406195882	0.0403388463089956	-0.0384837406195882	0	0.0210969759992015	-0.0384837406195882	-0.0577256109293823	0	-0.0155316589309795	0	0.0806776926179911	0.0018551056894074	-0.0962093515489706	-0.0192418703097941	0	0	0	0	0.0018551056894074	0	0	-0.0155316589309795	-0.0577256109293823	-0.0192418703097941	-0.0366286349301808	0.0632909279976047	-0.0384837406195882	0.0806776926179911	-0.0192418703097941	0.0018551056894074	0.0651460336870114	0.0018551056894074	0	0.0403388463089956	-0.0577256109293823	-0.0192418703097941	0	0	0.0403388463089956	-0.0384837406195882	-0.0192418703097941	0	0.0018551056894074	0	0	-0.0192418703097941	0	0.161355385235982	0
1467	0	0	0	0	0	0	0	0	0	0	0	0	0	0	0	0	0	0	0	0	0	0	0	0	0	0	0	0	0	0	0	0	0	0	0	0	0	0	0	0	0	0	0	0	0	0	0	0	0
1468	-0.011213276519399	0	0	0	0	-0.0336398295581969	0.0112082481442781	0.0336197160577137	0.0224215246636771	0	0.0224215246636771	0	-5.02837512079968e-06	0	0.179347055433813	-1.00567502415994e-05	0	0	0	0.0224215246636771	0	0.0224215246636771	0	0	0	0	0	0	0	0	0	0	0	0	0	0	0	0	0	0	0	0	0	0	0	0	0	0	0
1469	0	0	0	0	0	0	0	0	0	0	0	0	0	0	0	0	0	0	0	0	0	0	0	-0.0870322019147084	0	0	0	0	0	0	0	0.160128102481986	0	0	0	0	0	0	0	0	0	0	0	0	0	0	0	0	0
1470	0	0	0	0	0	0	0	0	0	0	0	0	0	0	0	0	0	0	0	0	0	0	0	0	0	0	0	0	0	0	0	0	0	0	0	0	0	0	0	0	0	0	0	0	0	0	0	0	0
1471	0	0	0	0	0	0	0	0	0	0	0	0	0	0	0	0	0	0	0	0	0	0	0	0	0	0	0	0	0	0	0	0	0	0	0	0	0	0	0	0	0	0	0	0	0	0	0	0	0
1472	0	0	0	0	0	0	0	0	0	0	0	0	0	0	0	0	0	0	0	0	0	0	0	0	0	0	0	0	0	0	0	0	0	0	0	0	0	0	0	0	0	0	0	0	0	0	0	0	0
1473	0	0	0	0	0	0	0	0	0	0	0	0	0	0	0	0	0	0	0	0	0	0	0	0	0	0	0	0	0	0	0	0	0	0	0	0	0	0	0	0	0	0	0	0	0	0	0	0	0
1474	0	0	0	0	0	0	0	0	0	0	0	0	0	0	0	0	0	0	0	0	0	0	0	0	0	0	0	0	0	0	0	0	0	0	0	0	0	0	0	0	0	0	0	0	0	0	0	0	0
1475	0	0	0	0	0	0	0	0	0	0.0142146410803127	0	0	-0.0142247510668563	0	0	0	-0.00711237553342817	0	0	0	0	0	0	0	0	0	0	0	0	0	0	0	0	0	0	0	0	0	0	0	0	0	0	0	0	0	0	0	0
1476	0	0	0	0	0	0	0	0	0	0	0	0	0	0	0	0	0	0	0	0	0	0	0	0	0	0	0	0	0	0	0	0	0	0	0	0	0	0	0	0	0	0	0	0	0	0	0	0	0
1477	0	0	0	0	0	0	-0.0212426978226235	0	0	0	0	0	-0.0106213489113117	0	-0.0106213489113117	0	0	0	0.0781022526318203	-0.0212426978226235	0	0	-0.0212426978226235	0	0	0	-0.0106213489113117	0	0	0	0	0	0	0	0	0	0	0	0	0	0	0.0374882849109653	0	0	0	0	0	0	0
1478	0	0	0	0	0	0	0	0	0	0	0	0	0	0	0	0	0	0	0	0	0	0	0	0	0	0	0	0	0	0	0	0	0	0	0	0	0	0	0	0	0	0	0	0	0	0	0	0	0
1479	0	0	0	0	0	0	0	0	0	0	0	0	0	0	0	0	0	0	0	0	0	0	0	0	0	0	0	0	0	0	0	0	0	0	0	0	0	0	0	-0.0267952840300107	0	0	0	0	0	0	0	0	0
1480	0	0	0	0	0	0	0	0	0	0	0	0	0	0	0	0	0	0	0	0	0	0	0	0	0	0	0	0	0	-0.0356760613628255	0	0	0	-0.0713521227256511	0	0	0	0	0	0	0	0	0	0	0	0	0	0	0
1481	0	0	0	0	0	0.0900900900900901	0	0	0	0	0	0	0	0	0	0	0	0	0	0	0	0	0	0	0	0	0	0	0	0	0	0	0	0	0	0	0	0	0	0	0	0	0	0	0	0	0	0	-0.0326370757180157
1482	0	0	0	0	0	0	0	0	0	0	0	0	0	0	0	0	0	0	0	0	0	0	0	0	0	0	0	0	0	0	0	0	0	0	0	0	0	0	0	0	0	0	0	0	0	0	0	0	0
1483	0	0	0	0	0	-0.0171732783788425	0	0	0	0	0	0	0	0	0	0	0	0	0	0	0	0	0	0	0	0	0	0	0	0	0	0	0	0	0	0	0	0	0	0	0	0	0	0	0	0	0	0	0
1484	0	0	0	0	0	0	0	0	0	0	0	0	0	0	0	0	0	0	0	0	0	0	0	0	0	0	0	0	0	0	0	0	0	0	0	0	-0.00728544368352033	0	0	0	0	0	0	0	0	0	0	0	0
1485	0.0138611371426897	0	0	0	0	0	0	0	0	0	0	0	0	0	0	0	0	0	0	0	0	0	0	0	0	0	0.114040549314922	0	0	0	-0.111529892416776	0.0308737264587836	0	-0.0170125893160939	-0.0510377679482817	0	0	-0.0170125893160939	0.0617474529175671	0	0	0	0	-0.139252166702155	-0.0340251786321878	0	0	0	0
1486	0	0	0	0	0	0	0	0	0	0	0	0	0	0	0	0	0	0	0	0	0	0	0	0	0	0	0	0	0	0	0	0	0	-0.0560538116591928	0	0	0	0	0	0	0	0	0	0	0	0	0	0	-0.112107623318386
1487	0	-0.00301340967304505	0	0.00555216256731997	0	-0.00301340967304505	0	0	0	0	0	0.00555216256731997	0	0	0	0	0	0	0	-0.00301340967304505	0	0	-0.0060268193460901	0.0111043251346399	0	0	0	0	0	0	0	0	0	0	0	0	0	0	0	-0.00301340967304505	0	0	0	0	0	0	0	0	0
1488	0	0	0	0	0	0	0	0	0	0	0	0	0	0	0	0	0	0	0	0	0	-0.0211954217888936	0	-0.0635862653666808	0.194552529182879	-0.0423908435777872	0	0	0	0	-0.0034803377412113	0	0	0	0	0	0	0	-0.0211954217888936	0	0	0	0	0	0	0	0	0	0
1489	0	0.159687989876669	-1.56075887207963	0.173097625927815	-0.101988781234064	-4.78549304021002	0	-0.0764915859255482	0	-0.528736283453265	0	-0.0254971953085161	-1.64929080023419	0	-0.101988781234064	-1.67611007233648	0	-0.331463539010709	-6.31532475872098	0.0161010066670444	0	0	0.108693599259637	0.0670953972840765	-1.5755378019529	-0.0764915859255482	0.0643568096398304	-0.0254971953085161	0	-0.72600902789582	0	-0.0254971953085161	0.064404026668177	-0.0509943906170321	0	-0.0254971953085161	0	0.185185185185185	-0.101988781234064	-0.12748597654258	0	0	0	-0.0254971953085161	0	0	0	0	-0.0603905792585034
1490	-0.0183016105417277	0	0	0.0531014597902966	0	0	0	0	0	0	0	0	0	0	0.0357015351660121	0	0	0	-0.00180337183488641	0	0.0357015351660121	0	0	0.266408984868926	0	0	-0.0183016105417277	0	0	0.0357015351660121	0	0	0	0	0	0	0.866121595351584	0	-0.0366032210834553	-0.309957801099063	-0.0732064421669107	0	0	-0.329428989751098	0	0	0	0.0357015351660121	0
1491	0	0	0	0	0	0	0	0	0	0	0	0	0	0.18796992481203	0	0	0	0	0	0	0	0	0	0	0	0	0	0	0	0	0	0	0	0	0	0	0	0	0	0	0	0	0	0	0	0	0	0	0
1492	0	0	0	0	0	0	0	0	0	0	0	0	0	0	0	0	0	0	0	0	0	0	-0.0351679268507121	0.0235849056603774	0	0	0	0	0.0235849056603774	0	0	0	0	0	0	0	0	0	0	0	0	0	0	0	0	0	0	0	0
1493	0	0	0	0	0	0	0	0	0	0	0	0	0	0	0	0	0	0	0	0	0	0	0	0	0	0	0	-0.0344115622849277	0	0	0	0	0	0.122138046658662	0	-0.0344115622849277	0	0	0.0292421614579113	0	0	0	0	0	0	0.127307447485678	0.12553320398149	-0.0688231245698555	0
1494	0.0542152344808891	-0.030362835888872	0	0	0	0	0	0	0	0	0	0	0	0	0	0	0	0	0	0	0	0	0	-0.015181417944436	0	0	0	0	0	0	0	0	0	-0.015181417944436	0	0	0	0	0	0	0	0	-0.015181417944436	0	0	0	0	0	0
1495	0.00447407274842289	0	0	0	0	0	0	0	0	0	0	0	0	0	0	0	0	0	0	0	0	0	0	0	0	0	0	0	0	0	0	0.00447407274842289	0	0	0	0	0	0	0	0	0	0.00447407274842289	0	0	0	0	0	0	0
1496	0.00344020916471721	-0.0069012027660975	0	0	0	0	0	0	0	0	0	0	0	0	0	0	0	0	0	0	0	0	0	0	0	0	0	0	0	0	0	0.00344020916471721	0	0	0	0	0	0	0	0	0	0	0	0	0	0	0.00344020916471721	0	0.00344020916471721
1497	0	0	0	0	0	0	0	0	0	0	0	0	0	0	0	0	0	0	0	0	0	0	0	0	0	0	0	0	0	0	0	0	0	0	0	0	0	0	0	0	0	0	0	0	0	0	0	0	0
1498	0	0	0	0	0	0	0	0	0	0	0	0	0	0	0.021491510853213	-0.00718803910293272	0	0	0	0	0	0	0	0.0429104152508407	-0.0143760782058654	0	0.021491510853213	0	0	0	0.057141280545536	0	0	0	0	-0.00718803910293272	0	0	-0.0287521564117309	-0.0215641173087982	0	0.0071154326473476	0	0	0	0	0	0	0
1499	0	0	0	0	0	0	0	0	0	0	0	0	0	0	0	0	0	0	0	-0.00322060110427	0	0	0	0	0	0.0196078431372549	-0.0114142221207625	0	0	0	0	0	0	0	0	0	0	0	0	0	0	0	0	0	0	0	0	0	0
1500	0	0	0	0	0	0	0	0	0	0	0	0	0	0	0	0	0	0	0	0	0	0	0	0	0	0	0	0	0	0	0	-0.00587941323455919	0	0	0	0	0	0	0	0	0	0	0	0	0	0	0	0	-0.0029397066172796
1501	0.0876424189307625	-0.0433275563258232	-0.216637781629116	-0.0433275563258232	0	0.045302168884055	-0.216637781629116	-0.0433275563258232	-0.259965337954939	0.135906506652166	0.090604337768111	-0.041352943767591	-0.127020750140122	-0.169361000186829	-0.56128361967747	-0.258978031675823	0.175284837861525	-0.302305588001647	-0.346620450606586	0.396859150886221	0.001974612558232	-0.342671225490122	-0.388960700653292	-0.12998266897747	0.267863788187868	0.090604337768111	-0.12998266897747	0.273787625862559	-0.040365637488476	0.358468125955978	-0.172322919024176	-0.4253771130253	0.316127875909269	0.52684181986369	-0.084680500093414	-0.433275563258232	0.309216731955459	0.134919200373049	-0.084680500093414	-0.298356362885183	-0.257003419117592	0.441174013491161	-0.167386387628597	-0.041352943767591	0	-0.0856678063725305	-0.346620450606586	0.175284837861525	-0.173310225303293
1502	0	0	0	0	0	0	0	0	0	0	0	0	0	0	0	0	0	0	0	0	0	0	0	0	0	0	0	0	0	0	0	0	0	0	0	0	0	0	0	0	0	0	0	0	0	0	0	0	0
1503	0.0114771031791576	0	0	0	0	0	0	0	-0.00608902149424587	0	0	0	0	0	0	0	0	0	0	0	0	0	0	0	0	0	0	0	0	0	0	0	0	0	0	0	0	0	0	0	0	0	0	0	0	0	0	0	0
1504	0	0	0	0	0	0	0	0	0	0	0	0	0	0	0	0	0	0	0	0	0	0	0	0	0	0	0	0	0	0	0	0	0	0	0	0	0	0	0	0	0	0	0	0	0	0	0	0	0
1505	0	0	0	0	0	0	0	0	0	0	0	0	0	0	0	0	0	0	0	0	0	0	0	0	0	0	0	0	0	0	0	0	0	0	0	0	0	0	0	0	0	0	0	0	0	0	0	0	0
1506	0	0	0.0231107002542177	0	0	0	-0.0136948781155848	0	-0.0136948781155848	0	0	0	0	0	0	0	0	0	0	0	0	0	0	0	0	0	0	0	0	0	0	0	0	0	0	0	0	0	0	0	0	0	0	0	0	0	0	0	0
1507	0	0	0	0	0	0	0	0	0	0	0	0	0	0	0	0	0	0	0	0	0	0	0	0	0	0	0	0	0	0	0	0	0	0	0	0	0	0	0	0	0	0	0	0	0	0	0	0	0
1508	0	0	0.0273747604708459	0	0	0	0.0273747604708459	0	0	0	0	0	0	-0.0135593220338983	0.0276308768738952	0	0	0	0	0	0	0	0	0	0	0	-0.0271186440677966	0	0	0	0	0	0	0	0	0	0	0	0	-0.0135593220338983	0	0	0	-0.0135593220338983	0	0	0	0	-0.0135593220338983
1509	0	0	0	0	0	0	0	0	0	0	0	0	0	0	0	0	0	0	0	0	0	0	0	0	0	0	0	0	0	0	0	0	0	0	0	0	0	0	0.0135365804580162	0	0	0	0	0	0	0	0	0.0139756173527604	0
1510	0	0	0	0	0	0	0	0	0	0	0	0	0	0	0	0	0	0	0	0	0	0	0	0	0	0	0	0	0	0	0	0	0	0	0	0	0	0	0	0	0	0	0	0	0	0	0	0	0
1511	0	0	0	0	0	0	0	0	0	0	0	0	0	0	0	0	0	0	0	0	0	-0.0101214574898785	0	0	0	0	0	0	0	0	0	0	0	0	0	0	0	0	0	0	0	0	0	0	0	0	0	0	0
1512	0	0	0	0	0	-0.0453309156844968	0	0	0	0	0	0	0	0	-0.317316409791478	0	0	0	-0.0453309156844968	0	0	0	0	0	0	0	0	0	0	0	0	0	0	0	0	0	0	-0.0453309156844968	0	0	0	0	0	0	0	0	0	0	0
1513	0	0	0	0	0	0	0	0	-0.0125580811252041	0	0	0	0	-0.0376742433756122	0	0	0	-0.0125580811252041	0	0	0	0	0	0	0	0	0	0	0	0	0	0	0	0.0463714351959193	0	0	0	0.0463714351959193	0	0	0	0	0	0	0	0	0	0	0
1514	0	0	0	0	0	0	0	0	0	0	0	0	0	0	0	0	0	0	0	0	0	0	0	0	0	0	0	0	0.0314500546352354	0	0	0	0	0	0	0	0	0	0	0	0	0	0	0	0	0	0	0	0
1515	0	0	-0.0981719777543312	0	0	-0.00860659264996988	0	0	0.0385876130631779	0	0	0.179508446343985	0	0	0	-0.0172131852999398	0	0	0	0	0	0	0	0	-0.0146596182772861	-0.00860659264996988	0	0	0	0	0	0	0	0	-0.0172131852999398	0	0	-0.0172131852999398	0	0	0	0	0.0025535670226536	0	0	0	0	0	0
1516	0	0	0	0	0	0	0	0	0	0	0	0	0	0	0	0	0	0	0	0	0	0	0	0	0	0	0	0	0	0	0	0	0	0	0	0	0	0	0	0	0	0	0	0	0	0	0	0	0
1517	0	0	0	0	0	0	0	0	0	0	0	0	0	0	0	0	0	0	0	0	0	0	0	0	0	0	0	0	0	0	0	-0.00505996053230785	0	0	0	0	0	0	0	0	0	0	0	0	0	0	0	0	0
1518	0	0	0	0	0	0	0	0	0	0	0	0	0	0	0	0	0	0	0	0	0	0	0	0	0	0	0	0	0	0	0	0	0	0	0	0	0	0	0	0	0	0	0	0	0	0	0	0	0
1519	0	-0.0487745396902817	-0.0121936349225704	0	0	-0.0121936349225704	0.0192752505782575	0	0	-0.0243872698451408	0	0	0	-0.0121936349225704	0	0	0	0	-0.0051120192668833	0	-0.0121936349225704	0	0	-0.0243872698451408	0	0	0	-0.0121936349225704	0	0.0456321168122021	-0.0243872698451408	-0.0365809047677113	0.0192752505782575	-0.0487745396902817	0	0	-0.0243872698451408	0	0	0.016132827700178	0	0	0	0.0192752505782575	0	0	0	0	0
1520	0	0	0	0	0	0	0	0	0	0	0	0	0	0	0	0	0	0	0	0	0	0	0	0	0	0	0	0	0	0	0	0	0	0	0	0	0	0	0	0	0	0	0	0	0	0	0	0	0
1521	0	0	0	0	0	0	0	0	0	0	0	0	0	0	0	0	0	0	0	0	0	0	0	0	0	0	0	0	0	0	0	0	0	0	0	0	0	0	0	0	0	0	0	0	0	0	0	0	0
1522	0	0	0	0	0	0	0	0	0	0	0	0	0	0	0	0	0	0	0	0	0	0	0	0	0	0	0	0	0	0	0	0	0	0	0	0	0	0	0	0	0	0	0	0	0	0	0	0	0
1523	0	0	0	0	0	0	0	0	0	0	0	0	0	0	0	0	0	0	0	0	0	0	0	0	0	0	0	0	0	0	0	0	0	0	0	0.00649814802781207	-0.00567134552672622	0	0	0	0	0	0	0	0	0	0	0	0
1524	-0.0345901072293324	0	0	0	0	0	0	0	-0.0345901072293324	0	0	0	-0.0345901072293324	0	-0.0691802144586648	0	-0.0345901072293324	0	0	-0.0345901072293324	0	0	0	0	0	0	0	0	0	0	0	0	0	0	0	0.0767459708365311	0	0	0	0	0	0	0	0	0	0	0	0	0
1525	0	0	0	0	0	0	0	0	0.00816459830176355	0	0.0875501874399067	0.499728627897846	-0.00347499739375195	0.0175438001177868	1.83278563349373	0.023448004540058	-0.00347499739375195	0.00816459830176355	0	0	0	0	0	0	0	0	0	0	0	0	0	0	0	0	0	0	0	0	0	0	0	0	0	0	0	0	0	0	0
1526	0	0	-0.00770534751117275	0	0	0	0	0	0	0	0.0171671807813281	-0.0154106950223455	0	0	-0.00770534751117275	0	0	0	0	0	-0.00770534751117275	0	0	0	0	0	0	0	0	0	0	0	0	0	0	0	0	0.00473091663507775	0	0	0	0	0	0	0	0	-0.00770534751117275	0.0124362641462505	0
1527	0	0	0	0	0	0	0	0	0	0	0	0	0	0	0	0	0	0	0	0	0	0	0	0	0	0	0	0	0	0	0	0	0	0	0	0.278668215370991	0	0	0	0.104931794333683	0.232191922071463	0.13760925340725	-0.108381502890173	0	0	0	0	0	0
1528	0	0	0	0	0	0	0	0	0	0	0	0	0	0	0	0	0	0	0	0	0	0	0	0	0	0	0	0	0	0	0	0	0	0	0	0	0	0	0	0	0	0	0	0	0	0	0	0	0
1529	0	0	0	0	0	0	0	0	0	0	0	0	0	0	0	0	0	0	0	0	0	0	0	0	0	0	0	0	0	0	0	0	0	0	0	0	0	0	0	0	0	0	0	0	0	0	0	0	0
1530	0	0	0	0	0	0	0	0.0229252636405319	0	0	0	0	0	0	0	0	0.130173298531614	2.76352147988439	0.0948104506279182	0.040281703444747	0.0229252636405319	0	0	0	0	0	0	0	0	0	0	0	0	0	0	0	0	0	0	0	0	0	0	0	0	0	0	0	0
1531	0	0	0	0	0	0	0	0	0	0	0	0	0	0	0	0	0	0	0	0	0	0	0	0	0	0	0	0	0	0	0	0	0	0	0	0	0	0	0	0	0	0	0	0	0	0	0	0	0
1532	0	0	0	0	0	0	0	0	0	0	0	0	0	0	0	0	0	0	0	0	0	0.0107747010020472	0	0	0	0	0	0	0	0	0	0	0	0	0	0	0	0	0	0	0	0	0	0	0	0	-0.00492174426616793	0	0
1533	0	0	0	0	0	0	0	0	0	0	0	0	0	0	0	0	0	0	0	0	0	0	0	0	0	0	0	0	0	0	0	0	0	0	0	0	0	-0.00718236012353659	0	0	0	0	-0.00718236012353659	0	0	0	-0.0574588809882928	0	0
1534	0	0	0	0	-0.0771604938271605	0	0	0	0	0	0	0	0	0.129198966408269	0	0	0	0	0	0	0	0	0	0	0	0	0	0	0	0	0	0	0	0	0	0	0	0	0	0	0	0	0	0	0	0	0	0	0
1535	0	0	0	0	0	0	0	0	0	0	0	0	0	0	0	0	0	0	0	0	0	0	0	0	0	0	0	0	0	0	0	0	0	0	0	0	0	0	0	0	0	0	0	0	0	0	0	0	0
1536	-0.0370644922164566	0	0	-0.0123548307388189	0	-0.0210645110978112	-0.0123548307388189	0	0	0	0	0	0	-0.0123548307388189	0	-0.0123548307388189	-0.0617741536940944	0	0	0	-0.0370644922164566	0	-0.0123548307388189	0	0	0	0	0	0	0	0	0	0	0	0	0	0	0	0	0	0	0	0	0.0265322366675511	0	0	0	0.0265322366675511	-0.0123548307388189
1537	0	0	-0.00576767793286423	0	0	0	0	0	0	0	0	0	0	0	0	0	0	0	0	0	-0.00576767793286423	0	0	0	0	0	0	0	0	0	0	0	0	0	0	0	0	0	0	0	0	0	0	0	0	0	0	0	0
1538	0	-0.00157212929191297	0	-0.00314425858382593	0.00248083554541169	0	0.00496167109082339	0.00248083554541169	0	0	0	0	0	0	0	0	0	-0.00157212929191297	0	0	0	0	-0.011668328081805	0	0	-0.00157212929191297	0	0	0	0	0	-0.00066342303841424	0	0.00338954179891042	0	0	-0.00314425858382593	-0.00157212929191297	0	-0.00223555233032721	0	0	0	-0.00157212929191297	0	0	0	0	0
1539	0	-0.026638252530634	0	0	0	0.091533180778032	0	0	0	0	-0.053276505061268	0	0	-0.053276505061268	0	0	0	0	0	0	-0.026638252530634	0	0	0.045766590389016	0	0	0	-0.026638252530634	0	-0.053276505061268	0	0	0	0.045766590389016	0	-0.007509914672252	0	0	0.045766590389016	0	0	0.045766590389016	0	-0.026638252530634	0	0	0	-0.026638252530634	0
1540	0	0	0	0	0	0	0	0	0	0	0	0	0	0	0	0	0	0	0	0	0	0	0	0	0	0	0	0	0	0	0	0	0	0	0	0	0	0	0	0	0	0	0	0	0	0	0	0	0
1541	0	0	0	0	0	0	0	0	0	0	0	0	0	0	0	0	0	0	-0.0230637084688768	0	0.103804963631712	0.404766256076608	-0.19266055045872	-0.0597609561752988	0.077597865419058	0.139478782119229	0.0167769289813224	0	0	0	-0.0199203187250996	0	2.46829196973573	0.0167769289813224	-0.0398406374501992	0	-0.0199203187250996	0	0	0	0.036697247706422	0	0.0702511056690668	-0.0199203187250996	0	0	0	0	0
1542	0	0	0	0	0	0	0	0	0	0	0	0	-0.00997904400758407	0	0	0	0	0.0172920871208246	0	0	0	0	-0.0299371320227522	0	0	0	0	0.0157430730478589	0	0	0	0	0	-0.0199580880151681	0	0	0	0	0	0	0	0.0215071020881338	0	-0.0042150149673092	0	0	0	0	0
1543	0	0	0	0	0	0	0	0	0	0	0	0	0	0	0	0	0	0	0	0	0	0	0	0	0	0	0	0	0	0	0	0	0	0	0	0	0	0	0	0	0	0	0	0	0	0	0	0	0
1544	0	0	0	0	0	0	0	0	0	0	0	0	0	0	0	0	0	0	0	0	0	0	-0.00555524693072607	0	0	0	0	0	0	0	0	0	0	0	0	0	0	0	0	0	0	0	0	0	0	0	0	0	-0.00555524693072607
1545	0	0	0	0	0	0	0.04995004995005	0	0	0	-0.0118884860013077	0	0	0	-0.0118884860013077	0	0	0	-0.00594424300065387	0	0	0	-0.0118884860013077	0	0	0	0	0	0.0327163474342931	0	0	-0.00594424300065387	0	0	0	0	0	0	0	0	0	0	0	0	0.0124875124875125	0	0	0	0
1546	0	0	0	0	0	0	0	0	0	0	0	0	0	0	0	0	0	0	0	0	0	0	0	0	0	0	0	0	0	0	0	0	0	0	0	0	0	0	0	0	0	0	0	0	0	0	0	0	0
1547	0	0	0	0	0	0	0	0	0	0	0	0	0	0	0	0	0	0	0	0	0	0	0	0	0	0	0	0	0	0	0	0	0	0	0	0	0	0	0	0	0	0	0	0	0	0	0	0	0
1548	0	0	0	0	0	0	0	0	0	0	0	0	0	0	0	0	0	0	0	0	0	0	0	0	0	0	0	0	0	-0.00436338249410943	0	0	0	0	0	-0.00872676498821887	0	0	0	0	0	0	0	0	0	0	0	0	0
1549	0	0	0	0	0	0.00403813550008444	0	0.015809026954391	0	0	0	0	0	0	0	0	0	0	0	0	0	0	0	0	0	0	0	0	0	0	0	0	0	0	0	0	0	0	0	0	0.00790451347719548	-0.00773275595422209	0	0	0	0	-0.00386637797711104	0	0
1550	0	0	0.089126559714795	0	0	0	0	0	0	0.0418004830465508	0	0	0	0	0	0	0	0	-0.052851670289938	0	0	0	0	-0.0473260766682442	0	0	0	0	0	0	0	0	0	-0.0473260766682442	0	0	-0.0473260766682442	0	0	0	0	0	0	0	-0.0473260766682442	0	0	0	0
1551	0	0	0	0	0	0	0	0	0	0	0	0	0	0	0	0	0	0	0	0	0	0	0	0	0	0	0	0	0	0	0	0	0	0	0	0	0	0	0	0	0	0	0	0	0	0	0	0	0
1552	0	0	0	0.0123730201729836	0	0	0	0	0	0	-0.0426621160409556	0	0	0	0	0	0	0	0	0	0	0	0	0	0	0	0	0	0	0	0	0	0	0	0	0	0	0	0	-0.0213310580204778	0	-0.0213310580204778	0	0	0	0	0	0	-0.0213310580204778
1553	0	0	0	0	0	0	0	0	0	0	0	0	0	0	0	0	0	0	0	0	0	0	0	0	0	0	0	0	0	0	0	0	0	0	0	0	0	0	0	0	0	0	0	0	0	0	0	0	0
1554	0	0	0	0	0	0	0	0	0	0	0	0	0	0	0.0125733715035686	0	0	0	0	0	0	0	-0.00865988309157826	0	0	0	0	-0.00432994154578913	0	0	0	0	0	0	0	0	0	0	0	0	0	0	0	0	0	0	0	0	0
1555	0	0	0	0	0	0	0	0	0	0	0	0	0	0	0	0	0	0	0	0	0	0	0	0	0	0	0	0	0	0	0	0	0	0	0	0	0	0	0	0	0	0	0	0	0	0	0	0	0.0142389292325217
1556	0	0	-0.0292654375182909	0	0	-0.0292654375182909	0	0	0	0	-0.0292654375182909	0	0	0.0482392667631452	0	-0.0585308750365818	0	-0.0877963125548727	0	0	-0.0205832165468736	0	0	0	0	0	0	0	0	0	-0.0292654375182909	0	0.0189738292448543	0	0	-0.0877963125548727	0	0	0	-0.0498486540651636	-0.0877963125548727	0	0	0	0	0	0	0	0
1557	0	0	0	0	0	0	0.0172176308539945	0	0	0	-0.00416927246195539	0	0	0	0	0	-0.00416927246195539	0	0	0	0	0	0	0	0	0	0	0	0	0	0	0	0	0	0	0	0	0	0	0	0	0	-0.00416927246195539	0	0	0	0	0	0
1558	0	0	-0.0167954316425932	0	0	0	0	0	0	0	0	0	0	0	-0.0167954316425932	0	0	0	0	0	0	0	0	0	0	0	0	0	0	0	0	0	0	0	0	0	0	0	0	0	0	0	0	0	0	0	0	0	0
1559	0	-0.0424268137462877	0	0	0	0	0	0	0	0	0	0	0	0.140745953553835	-0.0424268137462877	0	-0.0424268137462877	0	0	0	0	0	0	0	0	0	0	0	0.0351864883884588	0	0	0	-0.0212134068731438	0	0	0	0	0	0	0	0	0	0	0	0	0	0	0	0
1560	0	0	0	-0.0155894365977614	0	0	0	-0.00311788731955227	0	0	0	0	0	0	0	0	-0.00311788731955227	0	0	0	0	0	0.0144268917261776	0	0	0	0	-0.00311788731955227	0	0	0	0	0	0	0	0	-0.00623577463910454	0	0.0047034824723218	0	0	0	-0.00311788731955227	0	0	0	0	0	-0.0155894365977614
1561	0	0	0	0	0	0	0	0	0	0	0	0	-0.000556783572657472	0	0	0	0	0	0.00107422924051993	0	0	0	0	0	0	0	0	0	0	0	0	0	0	0	0	0	0	0	0	0	0	0	0	0	0	0	0	0	0
1562	0	0	0	0	0	0	0	0	0	0	0	0	0	0.0393808643243601	0	-0.293255131964809	0	0	0	-0.402058389525001	0	0	0	-0.402058389525001	0	0	0	0	0	0	0	-0.0977517106549365	0.159235668789809	0	0	0	0	0	0	0	0	0	0	0	0	0	0	0	0
1563	0	0	0	-0.0768836494105587	0	0	0	0	-0.0256278831368529	0.148644283701306	0	0	-0.0256278831368529	-0.0512557662737058	0.0499750124937531	0	-0.102511532547412	0	0	-0.0269086369168056	-0.0256278831368529	0	0	-0.0768836494105587	-0.0256278831368529	0	0	0.0999500249875062	0	0	0	0	-0.0256278831368529	-0.128139415684264	-0.0256278831368529	0.0499750124937531	-0.0512557662737058	0	-0.0256278831368529	-0.0768836494105587	0	0	0	0.0499750124937531	0	-0.0512557662737058	0	0	0
1564	0	-0.0168152009416513	0	0.0110778774786751	0	0	0	0	0	-0.00840760047082563	0	0	0	0	0	0	0	0	0	-0.00840760047082563	0	0	0	0	0.0053405540156989	0	0	0	0	0.0110778774786751	0	0	0	-0.0168152009416513	0	0	-0.00840760047082563	0	0	0	0	0	0	0	0	0	-0.00840760047082563	0	0
1565	-0.00769645193565766	0	-0.0204026699583922	-0.00769645193565766	0	-0.0561982437880998	0	-0.023089355806973	0	0	-0.0153929038713153	0	0.0338360992012959	0	0.0053733716971615	0	0.0003636056100846	0	0	0	0	0	0	-0.0023230802384962	-0.00769645193565766	-0.0153929038713153	0	-0.0384822596782883	0	0	0	-0.528651390867776	0.0053733716971615	-0.398397472603776	-0.00769645193565766	0	0	0.0130698236328191	0	-0.0434920257653652	0	0	-0.0153929038713153	-0.0150292982612308	-0.0277355162839654	0	0	-0.00769645193565766	-0.023089355806973
1566	0	0	0	0	0	0	0	0	0	0	0	0	0.0376860749952892	0	0	0	0	-0.00987947046038332	0	0	0	0	0	0	0	0	0	0	0	0	0	0	0	0	0	0	0	0.0188430374976446	0	0	0	0	0	0	0	0.0565291124929339	0	0	0
1567	0	0	0	0.0321012184288121	0.0170068027210884	-0.0179629962277708	0	0	0	0.0170068027210884	-0.0269444943416562	0	0	0	0	0	0	-0.0089814981138854	0	0	0	0	0	0	0	0	0	0	-0.0089814981138854	-0.0179629962277708	-0.0089814981138854	0	-0.0089814981138854	0	0	0	0	0	0	0	0	-0.0089814981138854	0	0	0	-0.0089814981138854	0	-0.0089814981138854	0
1568	0	0	0	0	0	0	0	0	-0.0133333333333333	0	0	0	0	0	0	0	0	0	0	-0.0266666666666667	0	0.0076750700280112	0	0	-0.080840336134454	0.0286834733893558	0	0	0.0420168067226891	-0.0266666666666667	0	0	0	0	0	0	0	-0.0113165266106442	0	-0.0456582633053222	0	0	0.0383753501400563	0.0286834733893558	0	-0.0303081232492997	-0.0266666666666667	0	-0.0133333333333333
1569	0.0621504039776259	0	0.556626031862311	-0.0223914017017465	0	0.226210214208757	-0.0447828034034931	-0.0945894079346001	0	0	0	-0.134348410210479	-0.0671742051052396	0.17640360967765	-0.241713024336628	-0.052534208467429	0	0	0	0	0	0	-0.166787414167453	0	0	0	0	0	-0.0223914017017465	0	0	-0.0447828034034931	0	0	0	0	0	0	-0.0895656068069861	0	0	0	0	0	0	0	0	0	0.0571266028500124
1570	-0.0760456273764259	0	0	0	0.280460611482754	0	0	0	0	0	-0.152091254752852	0	0	0.53475935828877	-0.0760456273764259	0	0	-0.228136882129278	0	0	-0.152091254752852	0	0	0	0	0	0	0	0	0	-0.0760456273764259	0	-0.152091254752852	0.35650623885918	0	0	0	0	0	0	0	0	0	0	0	0	0	0	0
1571	0	0	0	0	0	0	0	0	0	0	0	0	0	-0.0012605412764241	0	0	0.00339029703718193	0	0	0	0.0011514387805319	-0.0012605412764241	0.00232541915680301	0	0	0	0	0	0	0	0	0	0	0	0	0	0	0	0	0	0	0	0	0	0	0	0	0	0.00697625747040904
1572	0.129198966408269	0.8866409597746	0	0	0	0	0	0	0	-0.0734753857457752	0	0	0	0.075943551158424	-0.255929767403889	1.04346439291675	-0.367376928728876	0.16717074198748	0	0	0	0	0	0.129198966408269	0	-0.40288053889544	-0.0734753857457752	-1.22392525635695	-0.0734753857457752	0	0.258397932816537	-0.0734753857457752	0.258397932816537	0.129198966408269	0	0.0557235806624938	0	0	0	0	-0.0734753857457752	0	-0.0734753857457752	0	0	-0.0734753857457752	-0.385128733812157	0	0.129198966408269
1573	0	0	0	0	0	0	0	0	0	0	0	0	0	0	0	0	0	0	0	0	0	0	0	0	0	0	0	0	0	0	0	0	0	0	0	0	0	0	0	0	0	0	0	0	0	0	0	0	0
1574	0	0	0	0	0	0	0	0	0.0459805525138266	0	0	0	0	0	0	-0.0160926939169617	0	0	0	0	0	0	0	-0.0321853878339234	0	0	0	0	0	0	0	0	0	0	0	0.151736822221383	0	0	0.0620732464307883	0	0.154034351458442	0	0	0	0.262088150403057	0	-0.0321853878339234	0	-0.128741551335694
1575	0	0	0	-0.0263782643102084	0	-0.0263782643102084	0	0	0.0499251123315027	0	0	0	0	0	0	0	0	0	0	0	0	0	0.0998502246630055	0	0	0	0	0	0	0	0	0	0	0	0	0	0	0.0499251123315027	0	0	0	0	0	0	0	0	0	0	0
1576	0	0	0	0	0	0	0	0	0	0	0	0	0	0	0	0	0	0	0	0	0	0	0	0	0	0	0	0	0	0	0	0	0	0	0	0	0	0	0	0	0	0	-0.0754432289701999	0	0	0	0	0	0
1577	0	0	0	0	0	0	0	0	0	0	0	0	0	0	0	0	0	0	0	0	0	0	0	0	0	0	0	0	-0.0478468899521531	0	0	0	0	-0.0478468899521531	0	0	0	-0.0478468899521531	0	0	0	0	0	0	0	0	0	0	0
1578	0	0	0	0	0	0	0	0	0	0	0	0	0	0	0	0	0	0	0	0	0	0	0	0	0	0	0	0	0	0	0	0	0	0	0	0	0	0	0	0	0	-0.00612932883849219	-0.00306466441924609	0	0	0	0	0	0
1579	0	0	0	0	0	0	0	0	0	0	0	0	0	0	0	-0.0564174894217207	0	-0.0282087447108604	0	0.000239734374313301	-0.0282087447108604	0	0	0	-0.0564174894217207	0	0	0	0	0	0	-0.0564174894217207	0	0	0	0	0	0	0	0	0	0.0851057028812076	0	0	0	0	0	-0.0564174894217207	0
1580	0	0	0	0	0	0	0	0	0	0	0	0	0	0	0	0	0	-0.0756998499289508	0	0	0	0	0	0	0	0	0	0	0	0	0	0	0	0	0	0	0	0	0	0	0	0	0	0	0	0	0	0	0
1581	0	0	0	0	0	0	0	0	0	0.00679024920214572	0	0	0	0	0	0	0	0	0	0	0	0	0	0	0	0	0	0	0	0	0	0	0	0	0	0	0	0	0	0	0	0	0	0	0	0	0	0	0
1582	0	0	0	0	0	0	0	0	0	0	0	0	0	0	0	0	-0.012306177701206	0	0	0	0	0	0	0	0	0	0	0	0	0	0	0	0	0	0	0	0	0	0	0	0	0	0	0	0	0	0	0	0
1583	0	0	0	-0.0960153624579933	0	-0.0480076812289966	0.0212179317975757	0.351699882766706	0	0	-0.0960153624579933	-0.0480076812289966	0	0	0.117233294255569	0	0	0	0.138451226053144	0	0	-0.0480076812289966	0	-0.14402304368699	0.0692256130265724	0	-0.0480076812289966	-0.240038406144983	0	-0.0480076812289966	-0.00557181763384601	0	-0.362843518034397	0.303692201537709	0.20210502144587	0.772625378559983	0	0.117233294255569	0	0	0.117233294255569	0	0.234466588511137	0	0	0	0	-0.0960153624579933	-0.0480076812289966
1584	0.0874273639725307	0	0	0	0	0	0.666666666666667	0	0	0	0	0	0	0	0	-0.142102482831485	0	0	0	-0.0792393026941363	0	0	0	0	0	0	-0.0792393026941363	0	0	0	-0.158478605388273	-0.0792393026941363	0.357897517168515	-0.0792393026941363	0	-0.0792393026941363	0	-0.0792393026941363	0	0	0	-0.0792393026941363	0	0	0	0	0	0	0
1585	0	0	0	0	-0.0143256213738271	0	0	0	0	0	0	0	0	0	0	0	0	0	0	0	0	0	0	0	0	0	0	0	0	0	0	0	0	0	0	0	0	0	0	0	0	0	0	0	0	0	0	0	0
1586	0	0	0	0	0	0	0	0	0	0	0	0	0	0	0	0	0	0	-0.0448833034111311	0	0	0	0	0	-0.0448833034111311	0	0	0	0	0	0	0	0	-0.0448833034111311	0	0.123608693219029	0	0	0	0	0	0	0	0	0	0	0	0	0
1587	0	0	0	0	0	0	-0.114744693057946	0	0	0	0	0	0	0	0	0	0.1230012300123	0	0	0	0	0	0	0	0	0	0	0	-0.229489386115892	0	-0.049115809574619	0	0	0	-0.057372346528973	0	0	0	0	0	0	0.065628883483327	0	0	-0.172117039586919	0	0	0	0
1588	0	0	0	0	0	0	0	0	0	0	0	0	0	0	0	0	0	0	0	0	0	0	0	0	0	0	0	0	0	0	0	0	0	0	0	0	0	0	0	0	0	0	0	0	0	0	-0.05941770647653	0	0
1589	0	0	-0.00417553968850474	0	0	0	0	0	0	0	0	0	0	0	0	0	0	0	0	0	0	0	0	0	0	0	0	0	0	0	0	0	0	0	0	0	0	0	0	0	0	0	0	0	0	0	0	0	0
1590	0	0	0	0	0	0	0	0	0	0	0	0	0	0	0	0	0	0	0	0	0	0	0	0	0	0	0	0	0	0	0	0	0	0	0	0	0	0	0	0	0	0	0	0	0	0	0	0	0
1591	-0.0254939451880178	0	0	0	0	0	0.050487253990168	0	0	0.02830521104712	0.0604229607250755	0	0	0	0	0	-0.0382409177820268	0	-0.270998326719156	0	0.0604229607250755	0	0	0	0	0	0	-0.0127469725940089	0	-0.0382409177820268	0	0	0	0	-0.0127469725940089	0.0604229607250755	0	0.0604229607250755	0	0.0604229607250755	0	0	-0.0127469725940089	0	0	0	0	0	0
1592	0	-0.0356379187455453	0	0.0640204865556978	0	0	0	0	0	0	0	0	0	0	0	0	0	0	0.0567651356203055	0	0	0.0640204865556978	0	0	0.0640204865556978	0	0	0	0	0	0	0	0	0.128040973111396	0	0	0	0	0	0	0	-0.0712758374910905	0	0	-0.0356379187455453	0	0	0	0
1593	0	0	0	0	0	0	0	0	0	0	0	0	0	0	0	0	0	0	0	0	0	0	0	0	0	0	0	0	0	0	0	0	0	0	0	0	0	0	0	0	0	0	0	0	0	0	0	0	0
1594	0	0	0	0	0	0	0	0	0	0	0	0	0	0	0	0	0	0	0	0	0	0	0	0	0	0	0	0	0	0	0	0	0	0	0	0	0	0	0	0	0	0	0	0	0	0	0	0	0
1595	0	0	0	0	-0.0331895121141719	0	0	0.0352609308885755	0	0	0	0	-0.016594756057086	0	0	0	0	0	0	0	0	0	-0.016594756057086	0	0	0.0352609308885755	-0.016594756057086	0.0705218617771509	0	0.0352609308885755	0	0	0	0	0	0	0.0352609308885755	0	0	0	0	0	0	0	0	0	0	0	0
1596	0	0	0	0.0319475527675399	-0.0149476831091181	0	0	0	0	0	0	0	0	0	0	0	0	0	0	0	0	0	0	0	0	0	0	0	0	0	0	0	0	0	0	0	0	0	0	0	0	0	0	0	0	0	0	0	0
1597	0	0	0	-0.0289687137891078	0	-0.0289687137891078	0	0	0	0	0	0	0	0	0	0	0	0	0	0	0	0	0	0	0	0	0	0	0	0	0	0	0	0	0	0	0	0	0	0	0	0	0	0	0	0	0	0	0
1598	0	0	0	0	0	0	0	0	0	0	0	0.117785630153121	0	0	-0.0430663221360896	0	0	0	0	0	0	0	0	0	0	0	0	0	0	0	0	0	0	0	0	0	0	0	0	0	0	0	0	0	0	0	0	0	0
1599	0	0	0	0	0	0	0	0	0	0	0	0	0	0	0	0	0	0	0	0	0	0	0	0	0	0	0	0	0	0	0	0	0	0	0	0	0	0	0	0	0	0	0	0	0	0	0	0	0
1600	0	0	0	0	0	0	0	0	0	0	0	0	0	0	0	0	0	0	0	0	0	0	0	0	0	0	0	0	0	0	0	0	0	0	0	0	0	0	0	0	0	0	0	0	0	0	0	0	0
1601	0	0	0	0	0	0.227531285551763	0	0	-0.128949065119278	0	0	0	0	0	0	0	0	0.113765642775882	0	0	0.113765642775882	0	0	0	0	0	0	0.113765642775882	0	0	0	0	0	0	0	0.113765642775882	0	0	0	0	0	-0.0644745325596389	0	0	0	0	0	0	0
1602	0	0	0	0	0	0.0248262164846077	0.0868917576961271	0.0124131082423039	0	0	-0.018712874171516	0	0	0	0	0	0	0	0	0.0124131082423039	0	0.0124131082423039	0	0	0	0	0.0511341626434582	0.0124131082423039	0	0.0124131082423039	0.244553011033109	0	0	0.288278525305354	0.00463161263884892	0	0	-0.109313785680611	-0.01556299120691	0	0	0	0	0	0	0	0	-0.168788714775885	0
1603	0.0906660880329105	-0.074564643290376	-0.0079452264725568	-0.0266247494401364	-0.0426302888202068	0.090704450177896	0.146647113718171	0.0613481739327718	0.106652446340488	0.0986880387954384	-0.0185836176051161	-0.0186027986776085	-0.0479398938502398	-0.055942663540275	-0.106537359905531	-0.0186219797501013	0.0240274901425982	3.83621449856e-05	0.058731733562741	0.0373398648626665	0.013331555792561	0.0480166181402108	-0.0479590749227326	-0.0052904239575403	-0.029222008737675	0.077411256530321	0.016082263670041	0.12019499393047	0.000115086434957001	-0.0345699759126931	0.06140571715025	0.010830201857487	0.15749649664815	-0.029106922302718	-0.082452326545455	0.293294227436342	0.088414088040242	0.085490750510327	0.00542469146499	0.125389512525546	-0.026528844077673	0.088164734097836	-0.074411194710434	0.064156425027731	-0.00253971608006001	0.074756454015304	-0.015909634017606	0.048093342430182	-0.0772578079503784
1604	0	0	0	-0.0240963855421687	0	0	0.0486144871171609	0	0.0486144871171609	0	0	0	0	0	0	0	0	0	0	0	0	0	0	0	0	0	0	0	0	0	0	0	0	0.0486144871171609	0	0	0	0	0	0	0	0	0	0	0	0	0	0	0
1605	0	0	0	-0.0352609308885755	0	0	0	0	0	0	0	0	0	0	0.0675219446320054	0	0	-0.0352609308885755	0	0	0	0	-0.0352609308885755	0.135043889264011	0	0	0	0	0	0	0	0	0	0	0	0	0	0	0	0	0	0	0	0.0675219446320054	0	0	0	0	0
1606	-0.0228728270814273	0	0	0	0	0	-0.0114364135407136	-0.0228728270814273	0	0	0	0	0	-0.0114364135407136	0	-0.0228728270814273	0.0390930414386239	0	0.0390930414386239	0	0	0	0	-0.0228728270814273	0	-0.0114364135407136	0	0.019546520719312	0	0	0	0	0	0	0	0.019546520719312	0	-0.0228728270814273	-0.0457456541628545	0	0	-0.0114364135407136	0	0.0276566278979103	0	0	0	0	0
1607	0	0	-0.0435729847494553	0	0	0	0	0	0	0	0	0	0	0	0	0.14792899408284	-0.0131814724574906	0	0	0	0	0	0	0	0	0	0	0	0	0	0	0	0	0	0	0	0	0	0	0	-0.0871459694989107	0	0	0	0	0	0	0	0
1608	0	-0.00432021428262842	0	0	0	0	0	0	0	0	0	0	0	-0.00864042856525684	0	0	0	0	0	0	0	0	0	0	0	0	0	0	0	0	0	0	0	0	0	0	0	0	0	0	0	0	0	0	0	0	0	0	0
1609	0	0	-0.00547016027569608	0	0	0	-0.0109403205513922	0	0	-0.0109403205513922	0	0.0170940170940171	0	0	-0.00547016027569608	0	0	0	0.011623856818321	0	0.011623856818321	0.00854700854700855	0	-0.00786347228007965	0	0	0.00307684827131247	0	-0.0109403205513922	-0.00547016027569608	0	-0.0164104808270882	-0.00547016027569608	0.00854700854700855	0.0044439208051702	0	0	0.0061536965426249	0.0256410256410256	0.00854700854700855	-0.0164104808270882	0.0099140810808662	-0.0345307373916313	-0.0352142736585601	-0.00547016027569608	-0.0164104808270882	0	-0.0109403205513922	0.00307684827131247
1610	0	0	0	0	-0.0190985485103132	0	0.0112054214507003	-0.0254647313470843	0	0.0175716042874714	0	0	0	0	-0.0572956455309396	0	0	0.0720717673181314	0	0	0	0	0	0	-0.00636618283677107	-0.0127323656735421	0	-0.0763941940412529	-0.0127323656735421	0	0	0	0	0	-0.0190985485103132	0.0175716042874714	0	0	0	0	0	-0.00636618283677107	0	0	0	0	0.0575540514763437	0	0
1611	0	0	0	0	-0.0273560388455752	0	0	0	0	0	0	0	-0.0448107526197148	0	0	0	0	0	0	0	0	0.0358286059343895	0	0	0.0235793444942231	-0.0136780194227876	0	0	0	0	0	0	0	0	0	0	0	-0.0410340582683627	0	0	0	0	0	0	0	0	0	0.0297039752143065	0
1612	0	0	0	0	0	0	0	0	0	0	0	0	0	0	0	0	0	0	0	0	0	0	0	0	0	0	0	0	0	0	0	0	0	0	0	0	0	0	0	0	0	0	0	0	0	0	0	0	0
1613	-0.163302505387514	-2.61734539353165	-0.0479904543056646	-0.0766497661408093	0.0100029731058954	-0.06765899864682	-0.0963183104819646	-0.462597811809939	0.137342408517452	-0.01933114247052	-6.52582851014051	-0.162965103516879	-0.0379874811997693	-0.0479904543056646	-2.41391191270739	0.001687009353177	-0.03427606062278	-0.095306104870059	-1.41262224367481	0.099354927317683	0.274684817034904	0.030346321188321	-0.29411519534973	0.0293341155764154	0.118348667917568	-0.105646479846589	-0.152624728540348	0.034057741765311	0.0203433480824261	-0.234553841598157	-0.0479904543056646	-0.0483278561763	0.059343034894101	0.060692642376643	0.147345381623348	-0.144308764787629	0.421692796787617	0.00269921496508299	0.34381250617743	0.236697335835135	0.055750697330278	0.021018151823697	0.69975163252887	0.021018151823697	0.050689669270748	0.11509373222438	0.25569107643502	0.161734579047503	0
1614	0	0	0	0.0202347227842979	0	-0.0095831336847149	0	0	0	0	0	0	0.0202347227842979	0	0	0	0	0	0.0202347227842979	0	-0.0479156684235745	0	0	0	0	0	0	0	0	0	0	0	0	0	0	0	0	0	0	0	0	0	0	0	0	0	0	0	0
1615	0	0	0.0242248062015504	0	-0.0141843971631206	0	-0.0283687943262411	-0.0141843971631206	0	0	0	0	0	0	0	0	0.0726744186046512	0	0	0	0	0	0	0	0	0	0	-0.0141843971631206	0	0	0.0726744186046512	-0.312695860135246	0	0	0	0	0	0	0	0	0	0	0	0	0	0	0	0	0
1616	0	0	0	0	0	0	0	0	0	0	0.0144654997830175	0	0.028930999566035	0	0	0	0	0	0	-0.00650914534921565	0	0	0	0	0	0	0	0	0	0	0	0	0	0	0	0	0	0	0	0	0	0	0	0	-0.0195274360476469	0	0	0	0
1617	0	0	0	-0.00120248674258366	0	0	0	0	0	0	0	0	0	0	0	0	0.00017607132177052	-0.00120248674258366	0	0	0.00774313442081355	-0.00240497348516733	0	0	0	0	0	0	0	0	0	-0.00120248674258366	0	0	0	0	0	0	0	0	0	0	0	-0.00240497348516733	0	0	0	0	0
1618	0	0	0	0	0	0	0	0	0	0	0	0	0	0	-0.00698015309802462	0	0	0	0	0	0	0	0	0	0	0	0	0	0	0	0	0	0	0	0	0	0	0	0	0	0	0	0	0	0	0	0	0	0
1619	-0.0196009824270568	0	0	0.0732064421669107	-0.0928074245939675	-0.139211136890951	-0.0928074245939675	0.0268027298699269	-0.232018561484919	0.100009172036837	-0.139211136890951	-0.0464037122969838	0	0.0268027298699269	0.146412884333821	0	0	0.0732064421669107	0.146412884333821	0	-0.185614849187935	-0.0464037122969838	-0.0928074245939675	0.0732064421669107	-0.0928074245939675	0	0.0732064421669107	-0.0464037122969838	0	0.126811901906765	-0.185614849187935	0	-0.0464037122969838	0	-0.139211136890951	0.126811901906765	0	0	0	0	0	-0.0464037122969838	0	-0.185614849187935	0	0	0	0	0
1620	0	0	0	0	0	0	0	0	0	0	0	0	0	0	0.00378797129473449	0	0	0	-0.00994851642748775	0	0	0	0	0	0	0	0	0	0	0	0	0	0	0	0	0	-0.00248712910687194	0	0	0	0	0	0	0	0	0	0	0	0
1621	0	0	0	0	0	0	0	0	0	0	0	0	0	0	0	0	0	0	0	0	0	0	0	0	0	0	0	0	0	0	0	0	0	0	0	0	0	0	0	0	0	-0.0138007176373171	0	0	0	0	0	0	0
1622	0	0	0	0	0	0	0	0	0	0	0	0	0	0	0	0	0	0	0	0	0	0	0	0	0	0	0	0	0	0	0	0	0	0	0	0	0	0	0	0	0	0	0	0	0	0	0	0	0
1623	0	0	0	0	0	0	0	0	0	0	0	0	0	0	0	0	0	0	0	0	0	0	0	0	0	0	0	0	0	0	0	0	-0.00668292845925084	0	0	0	0	0	0	0	0	0	0	0	0	0	0	0	0
1624	0	0	0	0	0	0	0	0	0	0	0	0	0	0	0	0	0	0	0	0	0	0	0	0	0	0	0	0	0	0	0	0	0	0	0	0	0	0	0	0	0	0	0	0	0	0	0	0	0
1625	0	0	0	0	0	0	0	0	0	0	0	0	0	0	0	0	0	0	0	0	0	0	0	0	0	0	0	0	0	0	0	0	0	0	0	0	0	0	0	0	0	0	0	0	0	0	0	0	0
1626	0	0	0	0	0	0	0	0	0	0	0	0	0	0	0	0	0	0	0	0	0	0	0	0	0	0	0	0	0	0	0	0	0	0	0	0	0	0	0	0	0	0	0	0	0	0	0	0	0
1627	0	0	0	0	0	0	-0.0103551827689759	0	0.0041754769229741	0	0	0	0	0	0	0	0	0	0	0	0	0	0	0	0	0	0	0	0	0	0	0.01453065969195	0	0	0	-0.0103551827689759	0	0	0	0.01453065969195	0	0	-0.0207103655379517	-0.0103551827689759	0	0	0	0	0
1628	0	0	0	0	0	0	0	0	0	0	0	0	0	0	0	0	0	0	0	0	0	0	-0.0420875420875421	0	0	0	0	0	0	0	0	0	0	0	0	0	0	0	0	0	0	0	0	0	0	0	0	0	0
1629	0	0	0	0	0	0	0	0	0	0	0	0	0	0.0986854939394897	0	0	0	0	0	0	0.035633685710892	-0.00639427073342285	0	-0.00639427073342285	0	-0.0191828122002686	0	-0.0127885414668457	0	-0.00639427073342285	0	0	0	0	-0.00639427073342285	0	-0.0191828122002686	0	0.011877895236964	0	0	0	0	0	-0.0319713536671143	0	0	-0.00639427073342285	0
1630	0	-0.019657951641439	0	-0.019657951641439	-0.069881456349505	-0.0589738549243169	-0.019657951641439	0	0	-0.01506705141242	-0.772545364970498	-0.019657951641439	-0.122970060319441	0	-0.0393159032828779	-0.019657951641439	0	0	0	-0.019657951641439	0	-0.019657951641439	0	-0.294869274621584	-0.019657951641439	0	-0.137605661490073	0	-0.0786318065657558	0	0	0	0	0	0	0	-0.019657951641439	0	0	0	0	-0.0393159032828779	-0.0589738549243169	0	-0.019657951641439	0	0	0	0.0685871056241427
1631	-0.0279329608938547	0	0	0	0	0.0464252553389044	0	0	0	-0.0188813328976103	0	0	0.111342805122858	0.0464252553389044	0	-0.0558659217877095	0	-0.0558659217877095	0	0.0928505106778087	0	0	0	0.0184922944450497	0	0	0	0	0.157768060461762	0	0.0464252553389044	0.139275766016713	0	0	-0.0279329608938547	0.0464252553389044	0	0.0464252553389044	-0.0558659217877095	0	0	-0.0558659217877095	0.0464252553389044	-0.0558659217877095	0.139275766016713	0	0	-0.0837988826815642	0
1632	0	0.0516528925619835	0.103305785123967	0.332504552458327	-0.0141242937853107	0	0	0.011702152495681	0.0516528925619835	0.0185600224121026	0.0774793388429752	0.0258264462809917	0.0585107624784053	-0.0564971751412429	0	0	0	0.393437456226362	8.64508918149131	0.290540225054863	0.126710090115329	0	0.328477377784004	0.802633422047905	0.25301162627819	0.0468086099827241	0.016137881122473	0.0044357286267919	0.0516528925619835	0	0	0.100883643834337	1.05765863566326	11.7971121072046	-0.029065695475557	-0.0706214689265537	0.0258264462809917	0	0.0375285987766728	0.315958117383387	-0.141242937853107	0.123879394873232	0.011702152495681	-3.06138231311575	-0.0564971751412429	0	0.0492307512723537	-12.9476292197787	-0.188868655740767
1633	0	0	0	0	0	0	0	0	0	0	0	0	0	0	0	0	0	0	0	0	0	0	0	0	0	0	0	0	0	0	0	0	0	0	0	0	0	0	0	0	0	0	0	0	0	0	0	0	0
1634	0	0	0	0	0	0	0	0	0	0	0	0	0	0	0	0	0	0	0	0	0	0	0	0	0	0	0	0	0	0	0	0	0	0	0	0	0	0	0	0	0	0	0	0	0	0	0	0	0
1635	0	0	0	0	-0.0205044084478163	0	0	0	0	0	0	0	-0.0410088168956326	0	0	0.0375516334960571	0	0	0	0	0.0751032669921142	0	0	0	0	0	0	0	0	0	0	0	0	0	0	0	0.0375516334960571	0	0	0	0	0	0.0375516334960571	0	0	0	0	0	0
1636	-0.0120091269364717	-0.0150114086705896	-0.0180136904047076	-0.0210159721388255	0.0236919382838577	0.00293701861630079	-0.00600456346823586	-0.0036549129122893	0.00587403723260154	-0.00306754485193507	0.0206243934319227	-0.00600456346823586	0.00593930035041872	0	-0.00300228173411793	-0.00900684520235379	-0.00600456346823586	-0.00300228173411793	-0.00900684520235379	0	-0.00900684520235379	0.00293701861630079	0.017752637933439	0.00887631896671947	0	-0.0061350897038702	-0.0152724611418582	0.00593930035041872	0.00287175549848361	0	-0.00600456346823586	0	-0.00900684520235379	0.00593930035041872	0	0.00887631896671947	0	0.00593930035041872	-0.00300228173411793	0	0.0118786007008374	0	-6.526311781714e-05	-0.00300228173411793	-0.0120091269364717	-0.0031328079697522	-0.0180136904047076	-0.00300228173411793	0.00287175549848361
1637	-0.00149956512611343	0	0	0	0	-0.00149956512611343	0	0	0	0	0	0	0	0	0	0	0	0	0	0	0	0	0.00259497612621964	-0.00149956512611343	0	0	0	0	0	0	0	0	0	0	0	-0.00149956512611343	0	0	0	0.00259497612621964	0	0	0.00259497612621964	0	0	0	-0.00149956512611343	0	0
1638	0	0	0	0	0	0	0	0	0	0	0	0	0	0	0	0	0	0	0	0	0	0	0	0	-0.0367917586460633	0.0455166135639508	0	-0.213918035933005	0	0	0	0	0	0	0	-0.0735835172921266	0	0	0	0	0	0	-0.0367917586460633	0	0	0	-0.058026146430865	0	0
1639	0	0	0	0	-0.047438330170778	0	0	0	0	0	0	0	0	-0.047438330170778	0	0.140056022408964	0	-0.047438330170778	0	0.092617692238186	0	0	0.045179362067408	0	0	0.140056022408964	-0.094876660341556	-0.142314990512334	0	0	0	0	-0.047438330170778	-1.2898707870245	-0.149091894822445	-0.0225896810337001	-0.47664226981115	0	0	0	0	0	0	-0.047438330170778	0	0	-0.284629981024668	0	0
1640	0	0	0	0	0	0	0	-0.00623247117482082	0	0	0	0	0	0	0	0	0	0	0	0	0	0	0.00980680592331078	0	0	0	-0.00623247117482082	0	0	0	-0.00623247117482082	0	0	0	0	0	0	0	0	0.00980680592331078	0	0	0	0	0	0	0	0	-0.00623247117482082
1641	0	0	0	0	0	0	0	0	0	0	0	0	0	0	0	0	0	0	0	0	0	0	0	0	0	0	0	0	0	0	0	0	-0.00764409111756612	0	0	0	0	0	0	0	0	0	0	0	0	0	0	0	0
1642	0.11977149149339	0	0	0	0	0	0	0	0	0	0	0.0914913083257091	0	0	0	-0.0632111251580278	0	0	0	0	0	0	0	0	0	0	0	0	0	0	0	0	0	0	0	0	0	0	0	0	0	0	0	0	0	0	0	0	0
1643	0	0	-0.00332502078137988	0	0	0	0	-0.0107351286447955	0	0	0	0.0143449050049318	0	0.0246047229278279	0	0.0094997516222402	0	0	-0.00332502078137988	0.0176699257863117	-0.046265535360562	0	0	0.00769486344217205	-0.0273602325516949	0	0	-0.0429405145791821	0	0	-0.0081701741640715	0	0	0	0	0.0010448218794123	0	0	0.00845492974282792	0	0	0	-0.00076006630065587	0	-0.0155802820274871	0	0	-0.00076006630065587	0
1644	0	0	0	0	0	0	0	0	0	0	0	0	0	0	0	0	0	0	0	0	0	0	0	0	0	0	0	0	0	0	0	0	0	0	0	0	0	0	0	0	0	0	0	0	0	0	0	0	0
1645	-0.016774692530323	0	0	0.0271042017215419	0	-0.0877577885037297	-0.0993677264384435	0	-0.0438788942518649	-0.0141923152325183	0	-0.0658183413777973	-0.0800106566103156	-0.0877577885037297	0.0490436488474743	0	0.0787302278668211	0	-0.0851754112059249	0.0271042017215419	0	-0.255526233617775	0.0490436488474743	0	0.051626026145279	-0.438788942518649	0.0245218244237371	-0.0658183413777973	-0.0219394471259324	0.0245218244237371	-0.0658183413777973	0	0.0761478505690161	0	0.00774713189341411	0	-0.0219394471259324	0	-0.314877871845653	0.0490436488474743	0.0322689563171512	-0.0387141396562554	-0.12775235690348	0	-0.0412965169540602	-0.495558203448721	-0.0825930339081207	-0.970478908325823	-0.0632359640799926
1646	0	0	0	0	0	0	0	0	0	0	0	0	0	0	0	0	0	0	0	0	0	0	0	0	0	0	0	0	0	0	0	0	0	0	0	0	0	0	0	0	0	0	0	0	0	0	0	0	0
1647	0	0	0	0	0	0	0	0	0	0	0	0	0	0	0	0	0	0	0	0	0	0	0	0	0	0	0	0	0	0	0	0	0	0	0	0	0	0	0	0	0	0	0	0	0	0	0	0	0
1648	0.135685210312076	0	0	0	0	0	0	0	0	0	0	0	0	0	0	0	0	0	0	0	0	0	0	0	0	0	0	0	0	0	0	0	0	0	0	0	0	0	0	0	0	0	0	0	0	0	0	0	0
1649	0	0	0	0	0	0	0	0	0	0	0	0	0	0	0	0	0	0	0	0	0	0	0	0	0	0	0	0	0	0	0	0	0	0	0	0	0	0	0	0	0	0	0	0	0	0	0	0	0
1650	0	-0.0382165605095541	0	0	0	0	0	0	0	0	0	0	0	0	0	0	0	0	0	0	0	0	0	0	0	0	0	0	0	0	0	0	0	0	0	0	0	0	0	0	0	0	0	0	0	0	0	0	0
1651	0	0	0	0	0	0	0	0	0	0	0	0	0	0	0	0	0	-0.0286532951289398	0	0	-0.0859598853868195	0	0	0	0	-0.0573065902578797	0	0	0	-0.0403706444476811	0	0	0	0	0	0	0	0	0	0	0	0	0	0	0	0	0	0	0
1652	0	0	-0.00294550810014728	0	0	0	-0.00883652430044183	0.00400865870279804	0	0	0	0	0.00507180930544881	0.0120259761083941	0	0	0	0	0	0	0	0	0	0	-0.00294550810014728	0	0	0	0	0	0.0160346348111922	0.00400865870279804	0	-0.00589101620029455	0	0	0	0	-0.0147275405007364	-0.00589101620029455	0	0	0.00400865870279804	0	0	-0.00883652430044183	0	-0.00188235749749651	0.01430884525007
1653	0	0	0	0	0	0	0	0	0	0	0	0	0	0	0	0	0	0	0	0	0	0	0	0	0	0	0	0	0	0	0	0	0	0	0	0	0	0	0	0	0	0	0	0	0	0	0	0	0
1654	0	0	0	0	0	0	0	0	0	0	0	0	0	0	0	0	0	0	0	0	0	0	0	-0.00621890547263682	0	0	0	0	0	0	-0.00621890547263682	0	0	0	0	0	0	0	0	0	0	0	0	0	0	0	0	0	0
1655	-0.0107776041386	0	0	0.00777846919726198	-0.0215552082772	-0.0107776041386	0	-0.00538880206929999	0	0	0.015556938394524	0	0	0	-0.0161664062079	0	-0.00538880206929999	0	0	-0.00538880206929999	0	0	0	0	0	0	0	0	0	0	0	0	0	0	0	0	0	0	-0.0161664062079	0	0	0	0	0	0	0	0	0	0
1656	0	0	0	0	0	0	0	0	0	0	0	0	0	0	0	0	0	0	0	0	0	0	0	0	0	0	0	0	0	0	0	0	0	0	0	0	0	0	0	0	0	0	0	0	0	0	0	0	0
1657	0	0	0	0	0	0	0	-0.0445037828215398	0	0	0	0	0	0	0	0	0	-0.0445037828215398	0	0	-0.0445037828215398	0	0	-0.0445037828215398	0	0	0	0	0	0	0	0	0	0	0	0	0	0	0	0	0	0	0	-0.0445037828215398	0	0	0	0	0
1658	0	0	0	-0.018964536317087	-0.07047842621781	-0.018964536317087	0.043308791684712	0	0	0	0	0	0	0	0	0	0	0	0.043308791684712	0	0.043308791684712	0	0	0	-0.018964536317087	0	0	0	0	0	0	0	-0.0568936089512611	0	0	0	0	0	0	0	0	0	0	0	0	0	0	0	0
1659	-0.0469263256687001	0.183318056828598	0	0.366636113657195	-0.187705302674801	0.0894654054911977	0.274977085242896	0.085078159644994	-0.0960462742605022	0.317516165065394	0.0916590284142988	-0.0938526513374003	-0.053507194438005	0.136391731159898	-0.0938526513374003	-0.424530553941403	-0.469263256687001	0.228050759574196	-0.239018874189703	0.12542361654439	-0.422336931018301	0	0.14163922128966	-0.39954045750371	0.306548050449886	0.0206028505914899	-0.763982948237807	-0.149553468698507	0.127617239467492	0.270589839396693	0.0916590284142988	-0.469263256687001	-0.281557954012201	-0.0021936229231015	-0.1407789770061	0	0.183318056828598	0.228050759574196	-0.0938526513374003	-0.0491199485918012	0	0.0447327027455987	0	0	0	0	0	0	0
1660	0	0	0	0	0	0	-0.0702493853178785	0	0	0	-0.0702493853178785	0	0	0	0	0	0	0	0	0	0	0	0	0	0	0	0	0	0	-0.00763197767855479	0	0	0	0	0	0	0	0	0	0	0	0	0	0	0	0	0	0	0
1661	0	0	0	-0.00732225232481511	0	0	-0.0146445046496302	0	-0.0146445046496302	0	0	0	0	0	0	0	0	0	0	-0.0146445046496302	-0.00732225232481511	0	0	0	0	0	0	0	0	0	-0.00732225232481511	0	0	0	0	0	0	0	0	0	0	0	0	0	0	0	0	0	0
1662	0	0	0	0	0	0	0	0	0	0	0	0	0	0	0	0	0	0	0	0	0	0	0	0	0	0	0	0	0	0	0	0	0	0	0	0	0	0	0	0	0	0	0	0	0	0	0	0	0
1663	0	0	0	0	0	0	0	0	-0.0200662185211197	0	0	0	0	0	0	0	0	0	0	0	0	0	0	0	0	0	0	0	0	0	0	0	0	0	0	0	0	0	0	0	0	0	0	0	0	0	0	0	-0.0200662185211197
1664	0	0	0	0	0	0	0	0	0	0	0	0	0	0	0	0	0	0	0	0	0	0	0	0	0	0	0	0	0	0	0	0	0	0	0	0	0	0	0	0	0	0	0	0	0	0	0	0	0
1665	0	0	0	0	0	0	0	0	0	0	0	0	0	0	0	0	0	0	0	0	0	0	0	0	0	0.0252016129032258	0	0	0	-0.0059509640561771	0	0	0	0	0	0	0	0	0	0	0	0	0	0	0	0	-0.0059509640561771	0	0
1666	0	0	0	0	0	0	0	0	0	0	0	0	0	0	0	0	0	0	0	0	0	0	0	0	0	0	0	0	0	0	0	0	0	0	0.0161864681126578	0	0	0	0	0	0	0	0	0	0.0647458724506313	0	0	0	0
1667	0	0	0	0	0	-0.0112044817927171	0	0	0	0	0	0	0	0	-0.0112044817927171	0	0	0	0	0	0	0	0	0	0	0	0	-0.0112044817927171	0	0	0	0	0	0	0	0	0	0	0	0	-0.0112044817927171	0	0	0	0	0	0	0	0
1668	0	0	0	0	0	0	0.00682376489855336	0	-0.00330731578251091	0	0	0	0	0	0	0	0	0	0	0	0	0	-0.00496097367376637	0	0	-0.00165365789125546	0	0	0	0	0	0	-0.00165365789125546	0	0	0	0	0	0	0	0	0	0	0	0	0	0	0	0
1669	0	0	0	0	0.0238663484486874	0	0	0	0	0	0	0	0	0	-0.0112485939257593	0	0	0	0	0	0	0	0	0	0	-0.0112485939257593	0	0	0	0	0	0	0	0	0	0	0	0	0	0	0	0	0	0	0	0	0	0	0
1670	0	0	0	0	0	0	0	0	0	0	0	0	0	0	0	0	0	0	0	0	0	0	0	0	0	0	0	0	0	0	0	0	0	0	0	0	0.0075935281682965	0	0	0	0	0	0	0	0	-0.0130548302872063	0	0	0
1671	0	0	0	0	0	0	0	0	0	0	0	0	0	0	0	0	0	0	0	0	0	0	0	0	0	0	0	0	0	0	0	0	0	0.13262599469496	0	0	0	0	0	0	0	0	0	0	0	0	0	0.319446611535861	0
1672	0	0	0	0	-0.0212607632614011	0	0	0	0	0	0	0	0	0	0	0	0	0	0	0	0	0	0	0	0	0	0	0	0	0	0	0	0	0	0	0	0	0	0	0	0	0	0	0	-0.0212607632614011	0	0	0.0414336026517506	0
1673	0	0	0	-0.0117240166481036	0	-0.00293100416202591	0	-0.00293100416202591	-0.0205170291341814	0	0	-0.00586200832405182	0	0	-0.0117240166481036	-0.00879301248607773	0	0	0	-0.00586200832405182	0	-0.00293100416202591	-0.00586200832405182	-0.00879301248607773	0	0	-0.00586200832405182	0	0	0	0	-0.00293100416202591	0	-0.00293100416202591	0	0	0	0	0	0	0	0	0	-0.0073872163359846	0	0	-0.00586200832405182	0	0
1674	0	0	0	0	0	0	0	0	0	0	0	0	0	0	0	0	0	0	0	0	0	0	0	0	0	0	0	0	0	0	0	0	0	0	0	0	0	0	0	0	0	0	0	0	0	0	0	0	0
1675	0	0	0	0	0	0	0	0	0	0	0	0	0	0	0	0	0	0	0	0	0	0	0	0	0	0	0	0	0	0	0	0	0	0	0	0	0	0	0	0	0	0	0	0	0	0.0543612639788631	0	0	-0.011373831709678
1676	0	0	0	0	0	0	0	0	0	0	0	0	0	0	0	0	0	0	0	0	0	0	0	0	0	-0.108616944243302	0	0	0	-0.116802164618734	0	0	0.0642260757867694	-0.108616944243302	0	0.220698655065977	0	0	0	0	0	-0.0362056480811007	0	0	0	0	0	0	0.0642260757867694
1677	0	0	0	0	0	0	0	0	0	0	0	0	0	-0.0487092060399415	0	0	-0.0487092060399415	0	0	0	0	0	0	0	0	0	0	0	0.233918128654971	0	0	0.116959064327485	0	0	-0.0487092060399415	0	0	0	0	0	0	0	0	0	0	0	0	0	0
1678	-0.00810668396092578	0	0	0	0.00776036008070775	0	0	0	0	0	0.0155207201614155	0	0	0	0	0	0	0	0.0903537299267487	-0.000346323880218029	0	0	0	0	0	0	-0.0327730597239212	0	-0.0324267358437031	0	0	-0.0283733938632402	0	0	-0.0324267358437031	-0.00810668396092578	0	-0.000346323880218029	-0.00405334198046289	0	0.144958719923524	-0.0165596918020696	-0.00405334198046289	0.0033606942200268	-0.198716301624835	-0.00405334198046289	-0.00810668396092578	0	0
1679	0	0	0	0	0	0	0	0	0	0	0	0	0	0	0	0	0	0	0	0	0	0	0	0	0	0	0	0	0	0	0	0	0	0	0	0	0	0	0	0	0	0	0	0	0	0	0	0	-0.0133413381362151
1680	0	0	0	0	0	0	0	0	0	0	0	0	0	0	0	0	0	0	0	0	0	0	0	0	0	0	0	0	0	0	0	0	0	0	0	0	0	0	0	0	0	0	0	0	0	0	0	0	0
1681	0	0	0	0	0	0	0	0	0	0	0	0	0	0	0	0	0	0	0	0	0	0	0	0	0	0	0	0	0	0	0	0	0	0	0	0	0	0	0	0	0	0	0	0	0	0	0	0	0
1682	0	0	0	0	0	0	0	0	0	0	0	0	0	0	0	0	0	0	0	0	-0.0258064516129032	0	0	0	0	0	0	0.045004500450045	0	0	0	0	-0.0516129032258065	0	0	0	0	0	0	0	0	0	0	0	0	0	0	0	0
1683	0	0	0	0	0	0	0	0	0	0	0	0	0	0	0	0	0	0	0	0	0	0	0	0	0	0	0	0	0	0	0	0	0	0	0	0	0	0	0	0	0	0	0	0	0	0	0	0	0
1684	0	0	0	0	0	0	0	0	0	0	0	0	0	0	0	0	0	0	0	0	0	0	0	0	0	0	0	0	0	0	0	0	0	0	0	0	0	0	0	0	0	0	0	0	0	0	0	0	0
1685	0	0	0	0	0	0	0	0	0	0	0	0	0	0	0	0	0	0	0	0	0	0	0	0	0	0	0	0	0	0	0	0	0	0	0	0	0	0	0	0	-0.00942329438371655	0	0	0	0	0	0	0	0
1686	-0.0371195248700817	0	0	0	0	0	0	0	0	0	0	0	0	0	0	0	0	0	0	0	0	0	0	0	0	0	0	-0.0371195248700817	0	0	0	0	0	0.137931034482759	-0.0371195248700817	0	0	-0.0371195248700817	0	0	0	0	0	-0.0371195248700817	0	0	0	0	0
1687	0	0	0	0	0	0	0	0	0	0	0	0	0	-0.0079578937462027	0	-0.043630017452007	0	0	0	0	0	0	0	0	0	0	0	0	0	0	0	0	0	0	0	0	0	0	0	0	0	-0.043630017452007	0	0	0	0	0	0	0
1688	0	-0.00682920166632521	0	0	0	0	0	0	0	0	0	0	0	0	-0.0034146008331626	0	0	0	0	0.00712199985756	0	0	0	0	0.00712199985756	0	0	0	0	0	0.0037073990243974	0	0	0	0	0	-0.0034146008331626	0	0	0	0	0	0	0	0	0	0	0	0
1689	0	0	0.103538773662349	0.0032151393395056	0	0	-0.0205994656333728	0	-0.0049862877088008	0	-0.0583914615353992	-0.00997257541760159	0	0	0	0	0	-0.0349040139616056	0	0	0	0	0	0	0	0	0	0	0	0	0	0	0	0	0	0	0	0	0	0	0	-0.0049862877088008	0	0	0	0	0	0.0246042811449192	0
1690	0	0	0	0	0	0	0	0	0	0	0	0	0	0	0	0	0	0	0	0	0	0	0	0	0	0	0	0	0	0	0	0	0	0	0	0	0	0	0	0	0	0	0	0	0	0	0	0	0
1691	0	0	0	0	0	0	0	0	0	0	0	0	0	0	0	0	0	0	0	0	0	0	0	0	0	0	0	0	0	0	0	0	0	0	0	0	0	0	0	0	0	0	0	0	0	0	0	0	0
1692	0	0	0	0	0	0	0	0	0	0	0	0	0	0	0	0	0	0	0	0	0	0	0	0	0	0	0	0	0	0.0671140939597315	0.0335570469798658	0	0	0	0	0	-0.0570017100513015	0	0	0	0	0	0	0	0	0	0	0	0
1693	0	0	0	0	0	0	0	0	0	0	0	0	0	0	0	0	0	0	0	0	0	0	0	0	0	0	0	0	0	0	0	0	0	0	0	0	0	0	0	0	0	0	0	0	0	0	0	0	0
1694	0	0	0	0	0	0	0	0	0	0	0	0	0	0	0	0	0	0	0	0	0	0	0	0	0	0	0	0	0	0	0	0	0	0	0	0	0	0	0	0	0	0	0	0	0	0	0	0	0
1695	0	0	0	0	0	0	0	0	0	0	0	0	0	0	0	0	0	0	0	0	0	0	0	0	0	0	0	0	0	0	0	0	0	0	0	0	0	0	0	0	0	0	0	0	0	0	0	0	0
1696	0	0	0	0	0	0	0	0	0	0	0	0	0	0	0	0	0	0	0	0	0	0	0	0	0	0	0	0	0	0	0	0	0	0	0	0	0	0	0	0	0	0	0	0	0	0	0	0	0
1697	0	0	0	0	0	0	0	0	0	0	0	0	0	0	0	0	0	0	0	0	0	0	0	0	0	0	0	0	0	0	0	0	0	0	0	0	0	0	0	0	0	0	0	0	0	0	0	0	0
1698	0	0	0	0	0	0	0	0	0	0	-0.0023470872647045	-0.004694174529409	-0.0023470872647045	0	0	0	0	0	0	0	0	0	0	0	0	0	0	0	0	0	0	0	0	0	0	0	0	0	0	0	0	0	0	0	0	0	0	0	0
1699	0	0	0.0129584035246858	0	0	0	0	0	-0.0199004975124378	0	0	0.0259168070493715	0	0	0	0	-0.00995024875621891	0	0	0	0	-0.0199004975124378	0	0	0	0	0	0	0	0	0	0	0	-0.00995024875621891	0	-0.00995024875621891	0	0	0	0.0129584035246858	0	0	0	0	0	0	0	0	0
1700	0	0	0	0	0	0	0	0	0	0	0	0	0	0	0	0	0	0	0	0	0	0	0	0	0	0	0	0	0	0	0	0	0	0	0	0	0	0	0	0	0	0	0	0	0	0	0	0	0
1701	0	0	0	0	0	0	0	0	0	-0.0450755014649538	0	0	0	0	0	0	0	0	0	0	0	0	0	0	0	0	0	0	0	0.0606915459799659	0	0	0	0	0	0	0	0	0	0	0	0	0	0	0	0	0	0	0
1702	0	0	0	0	0	0	0.0058411214953271	0	0	0	-0.016597510373444	0	0	0	0	0	0	0	0	0	-0.0033195020746888	0	0	0	0	0	0	0	0	0	0	0	0	0	0	0	0	0	0	0	0	0	0	0	0	0	0	0	0
1703	0	0	0	0	0	0	-0.068073519400953	0	0	0	0	0	0	0	0	0	0	0	0	0	0	0	0	0	0	0	0	0	0	0	0	0	0	0	0	0	0	0	0	0	0	0	0	0	0	0	0	0	0
1704	0	0	0	0	0	0	0	0	0	0.00286139407119148	0	0	-0.00638131550819201	-0.001595328877048	-0.00319065775409601	0	0	-0.00032926368290453	0	0.00286139407119148	0.00572278814238297	0	-0.001595328877048	0.00286139407119148	0.00572278814238297	-0.001595328877048	-0.00319065775409601	0	0	0	0	-0.001595328877048	0	0	0	0	0	0	0	0	0	0	0	0	0	-0.001595328877048	0	0	-0.00319065775409601
1705	0	0.0521757960053994	0	0.0089605842508618	0	0.0216076058772688	0.108038029386344	0	0	0	0	-0.025294043252814	0	0	0	0	0	0	0	0	-0.012647021626407	0	0	0	0	0	0	0	0	0	0	0	0	0	0	0	0	0	0	0	0	0	-0.0542745238811731	0	0	0	0	0	0
1706	0	0.078125	0	0	0	0	0	0	0	0	0	0	0	0	0	0	0	0	0	0	0	0	0	0	0	0	0	0	-0.0165289256198347	0	0	0	0	0	0	0	0	0	-0.0165289256198347	0	0	0	0	-0.0165289256198347	0	0	0	0	0
1707	0	0	0	0	0	0	0	0	0	0	0	0	0	0	0	0	0	0	0	0	0	0	0	0	0	0	0	0	0	0	0	0	0	0	0	0	0	0	0	0	0	0	0	0	0	0	0	0	0
1708	0	0	0	0	0	0	0	0	0	0.0415454923140839	0	0	0	0	0	0	0	0	-0.0209205020920502	0	0	0	0	0	0	0	0	0	0	0	0	0	0	0	0	0	0	0	0	0	0	0	0	0	0	0	0	0	0
1709	0	0	0	0	0	0	0	0	0	0	0	0	0	0	0	0	0	0	0	0	0	0	0	0	0	0	0	0	0	0	0	0	0	0	0	0	0	0	0	0	0	0	0	0	0	0	0	0	0
1710	0	0	0	0	0	0	0	0	0	0	0	0	0	0	0	0	0	0	0	0	0	0	0	0	0	0	0	0	0	0	0	0	0	0	0	0	0	0	0	0	0	0	0	0	0	0	0	0	0
1711	0	0	-0.0663459943605905	0	0	0	0	0	0	0	0.0157550279299041	0	-0.0331729971802952	0	0	0	0	0	0	0	0	0	0	0	0	0	0	0	0	0.0323415265200517	0	0	0	0	0	0	0	0.0646830530401035	0.12770316475972	0	0	0	-0.0165864985901476	0	0	0	0	0	0
1712	0	0	0	0	0	0	0	0	0	0	0	0	0	0	0	0	0	0	0	0	-0.0246244767298695	0	0	0	0	0	0	0	0	0	0	0	0	0	0	0	0	0	0	0	0	0	0	0	0	0	0	0	0
1713	-0.0217485863418878	0	0.0225377507324769	0	-0.0302553863410643	0	-0.0512148082923634	-0.0108742931709439	0	-0.0108742931709439	0	0	0.132243855129808	-0.0108742931709439	0.087957518055444	0	0.113651926350277	0	0	-0.0201702575607095	0	-0.0108742931709439	-0.0761200521966072	0	0	-0.0652457590256633	0	-0.0761200521966072	0	0	0	-0.0326228795128317	0	0	0	0	0	0	0	0	-0.0108742931709439	-0.0326228795128317	0	0	0	0	0.0450755014649538	0	0
1714	0	0	0	0	0	0	0	0	0	0	0	0	0	0	0	0	0	0	0	0	0	0	0	0	0	0	0	0	0	0	0	0	0	0	0	0	0	0	0	0.0118476393578579	0	0.0360706570465552	0	0.00215051955063677	0.419865639937418	0.0177714590367869	0.00592381967892897	-0.0037733001282922	0
1715	0	0	0	0	0	0	0	0	0	0	0	0	0	0	0	0	0	0	0	0	0	0	0	0	0	0	0	0	0	0	0	0	0	0	-0.16273393002441	0	0	0	0	0	0	0	0	0	0	0	0	0	0
1716	0	0	0	0	0	0	0	0	0	0	0	0	0	-0.00858516483516484	0.0564493367202935	0	0	0	0	0	0	0	0	0	0	0	0.0141123341800734	0	0	0	0	0	0	0	-0.00858516483516484	0	0	0	0	0	0	0	0	0	0.0141123341800734	0	0.00552716934490856	0	0
1717	0	0	0	0	0	0	0	0	0	0	0	0	0	0	0	0	0	0	0	0	0	0	0	0	0	0	0	0	0	0	0	0	0	0	0	0	0	0	0	0	0	0	0	0	0	0	0	0	0
1718	0	0	0	0	0	0	0	0	0	0	-0.0073202237983894	0	0	0	0	0	0	0.0111382115175335	0	0	0	0	0	-0.00827472072817542	0	0	-0.009867962947849	0.0267331560440984	0	0	0	0.000954496929786101	0	0	0	0	0	-0.0165494414563508	0	0	0	0	0	0	0	0	0	0	0
1719	0	0.00730111333498385	0	0	0	0	0	0	-0.00257493047687712	0	-0.00772479143063137	0	0.00622548714436905	-0.00257493047687712	0	0.0124509742887381	0.00622548714436905	0	0	-0.00257493047687712	0	0	0	-0.00257493047687712	0	-0.00514986095375425	0.0124509742887381	0	0	0	0	-0.00514986095375425	0	0.0124509742887381	0	0	-0.00257493047687712	0	0	0	0	0	0	-0.00257493047687712	0	-0.00257493047687712	0	0.00622548714436905	-0.0102997219075085
1720	0	0	0	0	0	0	0	0	0	0	0	-0.078740157480315	0	0	0	0	0	0	0	0	0	0	0	0	0	0	0	0	0	0	0	0	0	0	0	0	0	0	0	0	0	0	0	0	0	0	0	0	0
1721	0	0	0.0307597662257767	0.0615195324515534	-0.0220264317180617	0	-0.0793723923645313	-0.0220264317180617	0	-0.066079295154185	0	0	0	0	-0.0220264317180617	0.0307597662257767	0	0	0.09227929867733	0	0.01746666901543	0	-0.0132930972103467	0	0	0.0307597662257767	-0.0440528634361234	0	-0.0440528634361234	0	0	0	0.0307597662257767	0	0	0	-0.0220264317180617	0	0	0.0615195324515534	0	-0.0220264317180617	0	0	0	0	0	0	0
1722	0	0	0	0	0	0	0	0	0	0	0	0	0	0	0	0	0	0	0	0	0	0	0	0	0	0	0	0	0	0	0	0	0	0	0	0	0	0	0	0	0	0	0	0	0	0	0	0	0
1723	0	0	0	0	0	0	0	0	0	0	0	0	0	0	0	0	0	0	0	0	0	0	0	0	0	0	0	0	0	0	0	0	0	0	0	0	0	0	0	0	0	0	-0.00732225232481511	0	0	0	0	0	0
1724	0	0	0	0.097815454841865	0	0	0	0	0	0	0	0	0	0	0	0.032605151613955	0	0	0.097815454841865	0	0	0	0	0	0	0	0	0	0.0945354389917052	0	0	0	0	0	0	0	0	0	0	0	0	0	0	-0.0119617224880383	0	0	0	0	0
1725	0	0.102262314159585	-0.180831826401447	0	0	0	0.192678227360308	0	0	0	0	0	0	0	0	0	-0.180831826401447	0	-0.0904159132007233	0	0.192678227360308	0	0	-0.0904159132007233	0.192678227360308	0	-0.27124773960217	0	0.192678227360308	0	0	-0.0904159132007233	0	0	0	0	0	0	0	0	0	0.385356454720617	0	0	0	-0.0904159132007233	0	-0.0904159132007233	0
1726	0	0	0	0	0.00598802395209581	0.0239520958083832	-0.00415489446568057	0	0	0	0	0	0	0	0	0	0	0	0.00598802395209581	0	0	0	0	0	0	0	0	0	0	0	0	0	0	0	0	0	0	0	0	-0.0097756954099115	0	0	0	0	0	0	0	0	-0.0272511317733488
1727	0	0	0	0	0	-0.0746825989544436	0	0	0	0	0	0	0	0	0	0	0	0	0	0	0	0	0	0	0	0	0	0	-0.0746825989544436	0	0	0	0	0	0	0	0	0	0	0.0884955752212389	0	0	0	0	0	0	0	0	0
1728	0	0	0	0	0	0	0	0	0	0	0	0	0	0	0	0	0	0	0	0	0	0	0	0	0	0	0	0	0	0	0	0	0	0	0	0	0	0	0	0	0	0	0	0	0	0	0	0	-0.0694444444444444
1729	0	0	0	0	0	0	0	0	0	0	0	0	0	0	0	0	0	0	0	0	0	0	0	0	0	0	0	0	0	0	0	0	0	0	0	0	0	0	0	0	0	0	0	0	0	0	0	0	0
1730	0	0	0	0	0	0	0	0	0	0	0	0	0	0	0	0	0	0	0	0	0	0	0	0	0	0	0	0	0	0	0	0	0	0	0	0	0	0	0	0	0	0	0	0	0	0	0	0	0
1731	0	0	0	0	0	0	0	0	0	0	0	0	0	0	0	0	0	0	0	0	0	0	0	0	0	0	0	0	0	0	0	0	0	0	0	0	0	0	0	0	0	0	0	0	0	0	0	0	0
1732	0	0	0	0	0	0	0	0	0	0	-0.171086398631309	0	0	0	-0.0855431993156544	0	0	0	0	-0.0855431993156544	0	0	0	0	0	0	0	0	-0.0855431993156544	0	0	0	0	0	0	-0.0855431993156544	0	0.147710487444609	0	0	0	0	0	0	0	0	0	0	0
1733	0	0	0	0	0	0	0	0	0	0	0	0	0	0	0	0	0	0	0	0	0	0	0	0	0	0	0	0	0	0	0	0	0	0	0	0	0	0	0	0	0	0	0	0	0	0	0	0	0
1734	0	0	0.00975990630489947	0	0	0	0	0	0	0	-0.00394773202794994	0	0	0	0	0	0	0	0	0	0	0	0	0	0	0	0	0	0	0	0	0	0	0	0	0	0	0	0	0	0	0	0	0	0.00975990630489947	0.0390396252195979	0	0	0
1735	0	-0.835188805784918	-0.0437732545414752	0	-0.153206390895163	0	0	0	0	0	0	0	0	0	0	0	0.0153573205877354	0	0	0.037243947858473	0	0	0	-0.0218866272707376	0	-0.0218866272707376	0	0	0	0	0	0	0	-0.131319763624425	0	0	-0.0065293066830022	0	0	-0.0437732545414752	0	0	0	0	0	0	0	0	0
1736	-0.0291630212890055	0	0	0	0	0	-0.0291630212890055	-0.0874890638670166	0	-0.0291630212890055	0	0	-0.0097351776606156	0	0	0	0	0	0	0	-0.0291630212890055	0	0	0	0	-0.0583260425780111	0	-0.0583260425780111	-0.0874890638670166	-0.0291630212890055	0	0	0	0	0	0	0	0	0	0	0.0485908649173955	0	0	0.0485908649173955	0	-0.0291630212890055	0	0	0
1737	0	0	0	0	0	0	0	0	0	0	0	0	0	-0.0335908632851864	0	0	0	0	0	0	0	0	0	0	0.0244137770860433	0	0	0	0	0	0	0	0	0.116009280742459	0	0	0	0	0	0	0	0	0	0	0	0	0	0	0
1738	0	0	0	0	0	0	0	0	0	0	0	0	0	0	0	0	0	0	0	0	0	0	0	0	0	0	0	0	0	0	0	0	0	0	0	0	0	0	0	0	0	0	0	0	-0.109210047324354	0	0	0	0
1739	0	0	0	-0.102986611740474	0	0	-0.0316881882278381	0	0	0	-0.0237661411708786	0	0	0	0	0	0	-0.00792204705695952	0	0	0	0	0	0	0	0	0	0	0	0.152439024390244	0	0	0	0	0	0	0	0	0	0	0	0	0	0	0	0	0	0	0
1740	0	0	0	0	0	0	0	0	0	0	0	0	0	0	0	0	0	0	0	0	0	0	0	0	0	0	0	0	0	0	0	0	0	0	0	0	0	0	0	0	0	0	0	0	0	0	0	0	0
1741	0	0	0	0	0	0	0	0	0	0	0	0	0	0	0	0	0	0	-0.0309789343246592	-0.0619578686493185	0	0	0	0	0	0	0	0	0	0	0	0	0	0	0	0	0	0	0	0	0	0	0	0	0	-0.0309789343246592	0	0	0
1742	0.63870354576177	-0.8962133904562	1.40092376989736	-0.1579274831993	0.12256933637857	0.11933722839496	0.82493983681755	-0.105851536463333	0.0157704579200399	-0.412567438908283	-0.078295029603045	0.072973196630026	0.360686533171319	0.216829864900672	0.175592625109745	0.248565821739771	0.016912840914251	-0.349095525230086	-0.12485410236699	-0.571247223103777	-0.14708877625426	-0.354417358203104	-0.466538069634652	0.665312710626869	0.016912840914251	-0.380831482069184	0.02641412386608	-0.0317359568390987	-0.0708834716406213	0.226331147852501	-0.195737574007611	-0.825134877816566	0.23583243080433	0.75728847316055	-0.87074660858532	-0.20543389795845	0.21245537392285	-0.1280862103506	-0.837868268752004	0.0866539295606701	-0.093118145527891	-0.290945444524907	0.0305935738449001	-0.354417358203104	0.5499598912117	-1.29908450541364	0.075062921619431	-0.567067773124968	-0.337504517288852
1743	0	0	0	0	0	0	0	0	0	0	0	0	0	0	0	0	0	0	0	0	0	0	0	0	0	0	0	0	0	0	0	0	0	0	0	0	0	0	0	0	0	0	0	0	0	0	0	0	0
1744	0	0	0	0	0	0	0	0	-0.0124347177319075	0	0	0	0	0	0	0	0	0	0	0	0	0	0	0	0	0	0	0	0	0	0	0	0	0	0	0	0	0	0.0107839965491211	0	-0.0078680800487401	0	-0.0124347177319075	0	0	0	0	-0.00621735886595374	0
1745	0	0	0	0	0	0	0	0	0	0	0	0	0	0	0	0	0	0	0	0	0	0	0	0	0	0	0	0	0	0	0	0	0	0	0	0	0	0	0	0	0	0	0	0	0	0	0	0	0
1746	0	0	0	0	0	0	0	0	0	0	0	0	0	0	0	0	0	0	0	0	0	0	0	0	0	0	0	0	0	0	0	0	0	0	0	0	0	0	0	0	0	0	0	0	0	0	0	0	0
1747	0	0	0	0	0	0	0	0.0719424460431655	0.215827338129496	0.0719424460431655	0	0	0	0.143884892086331	-0.0760167236792094	0	0	0	-0.156107724994463	0	0	0	0	0	0	0	0	0	0	0	0	0	0	0	0	0	0	0	0	0	0	0	0	0	0	0	0	0	0
1748	0	0	0	0	0	0	0	0	0	0	0	0	0	0	0	0	0	0	0	0	0	0	0	0	0	0	0	0	0	0	0	0	0	0	0	0	0	0	0	0	0	0	0	0	-0.011832919181162	0	0	0	0
1749	0	0	0	0	0	0	0	0	0	0	0	0	0	0	0	0	0	0	0	0	0.0299043062200957	0	-0.0168548794876117	0	0	0	0	0.0598086124401914	0	0	0	0	0	0	0	0	0.0859074659051597	0	0	0	0.0299043062200957	0	0	0.0299043062200957	0	0	0	0	0
1750	-0.0469704086425552	0.49822949441395	0	-0.227720691215675	0	0	2.29913716002754	0.114155251141553	-0.00654154092967099	0	0	0	0	0	0	-0.0469704086425552	0	0	0	0.114155251141553	-0.0939408172851104	0	0	-0.140911225927666	0	0	0	0	-0.0469704086425552	0	0	0	0	0	-0.0469704086425552	0	0	0	0	0	0	0	0	0	0	0	0	0	0.342465753424658
1751	0.0222392926321849	0.378067974747142	0.0424715350532667	0.0222392926321849	0	0	0	0	-0.00808211428109593	-0.0484926856865756	-0.00808211428109593	-0.0323284571243837	0.0808750562476433	0.0303214069132808	-0.0161642285621919	0.121285627653123	0.0424715350532667	0.568132443944607	-0.00808211428109593	0.0141571783510889	0.341671503763869	0.006075064069993	-0.00808211428109593	0	0	0.0222392926321849	0	0.0040680138588901	0	1.18475757357579	0.0222392926321849	0	0	0.212249848392965	-0.00808211428109593	-0.0161642285621919	-0.00808211428109593	-0.0161642285621919	0.440717838784807	-0.0161642285621919	0.143578833721992	0.0828821064587464	0	0.0606428138265616	0	-0.14748510727083	-0.0161642285621919	0.0404644848421636	0
1752	-0.0105887335874629	0	0	0	0	0	0	-0.0105887335874629	0	-0.0105887335874629	0	0	0	0	0	-0.0105887335874629	0	0	0	0	-0.0105887335874629	0	0	0	0	0	0	0	0	0	0	0	-0.0105887335874629	0	0	0	0	0	0	0	-0.0105887335874629	0	0	0	0	0	0	0	0
1753	0	0	0	0	0	0	0	0	0	0	0	0	0	0	0	0	0	0	0	0	0	0	0.0584453535943892	0	0	0	0	0	0	0	0	0	-0.0695410292072323	0	0.0292226767971946	0	0	0	0	0	0	0	0	0	0	0	-0.0231803430690774	0	0
1754	-0.00299204117048651	0	0	0	0	0	0	0	-0.00598408234097301	0	0.0137950062077528	0	0.057006866356818	0	0	0	0	0	0	0	0	0	-0.011968164681946	-0.00299204117048651	0	0	0	0	0.0137950062077528	0	0	0	0	0	0.0462039013195517	0	0	0	0	0	0	0	0	0	0	-0.00598408234097301	0	0	0
1755	0	0	0	0	0	0	0	0	0	0	0	0	0	0	0	0	0	0	0	0	0	0	0	0	0	0	0	0	0	0	0	0	0	0	0	0	0	0	0	0	0	-0.038109756097561	0	0	0	0	0	0	0
1756	0	0	0	0	0	0	0	0	0	0	0	0	0	0	0	0	0	0	0	0	0	0	0	0	0	0	0	0	0	0	0	0	0	0	0	0	0	0	0	-0.0602409638554217	0	0	0	0	0	0	0	0	0
1757	0	0	0	0	0	0	0	0	0	0	0	0	0	0	0.0598091257577731	0	0	0	0	0	0.0019768026852541	0	0	0	0	0	0	0	0	0	-0.0166417041105009	0	0.018618506795755	0	0	0	0.18618506795755	-0.0249625561657514	0	0	0.057832323072519	-0.00832085205525046	0	0.251924601771085	-0.00832085205525046	0.90205720402206	0.0661531751277694	0	-0.054292359016245
1758	0	0	0	0	0	0	0	0	0	0	0	0	0	0	0	0	0	0	-0.00679578661230037	0	0	0	0	0	0	0	0	0	0	0	0	0	0	0	0	0	0	0	0	0	0	0	0	0	0.0125992188484314	0	0	0	0
1759	0	0	0	0	0	0	0	-0.0469851213782302	-0.0156617071260767	0	0	0	0	0	0	0	0	0	0.0327868852459016	0	0	0	0	0	0	0	0	0	0	0	0	0	0	0	0	0	0	0	0	0	0	0	0	0	0	0	-0.0313234142521535	1.10625569662503	-0.0313234142521535
1760	0	0.0488004511827404	0	0	-0.00263234094079865	0	0	-0.0105293637631946	0	-0.0131617047039933	0.00292290598992742	0	0	0.00029056504912877	0	0	0	0	0	0	0	0	0	-0.00263234094079865	0	0	0	0	0	0	0	0	0	0	0	0	0	0	0	0	0	0	0	-0.00263234094079865	0	0	0	0	0
1761	0	0	0	0	0	0.058386854616732	-0.00332899392809998	0	0.036054853682395	0	0	0	0.055057860688632	0	0	0	-0.0749948354358084	0	0.076113747283865	0.0050119853028617	0.00834097923096172	0	0.024199936416216	-0.00583498657953087	-0.429958060224829	0	0	0	0	0	-0.064147863553416	0	0	0	-0.00583498657953087	0	0	0	-0.0291749328976543	0	0	0	0	-0.118345734143956	0.00834097923096172	0	-0.034935941834339	0.00250599265143085	0
1762	0	0	0	0	0	0	0	0	0	0	0	0	0	0	-0.0683526999316473	0	0	0	0	0	0	0	0	0	0	0	0	0	0	0	0	0	0	0	0	0	0	0	0	0	0	0	0	0	0	0	0	0	0
1763	0	0	0	0	0	0	-0.0395413206801107	0	0	0	0	0	0	0	0	0	0	0	0	0	0	0	0	0	0	0	0	0	0	0	0	0	0	0	0	0	0	0	0	0	0	0	0	0	0	0	-0.0395413206801107	0	0
1764	0	0	0	0	0	0	0	0	0	0	0	0	0	0	0	0	0	0	0	0	0	0	0	0	0	0	0	0	0	0	0	0	0	0	0	0	0	0	0	0	0	0	0	0	0	0	0	0	0
1765	0	0	0	0	0	0	0	0	0	0	0	0	0	0	0	0	0	0	0	0	0	0	0	0	0	0	0	0	0	0	0	0	0	0	0	0	0	0	0	0	0	0	0	0	0	0	0	0	0
1766	0	0	0	0	0	0	0.027678111776405	0	0	-0.508482599334009	0	0	0	0	0	-0.0238151940938319	0	0	-0.0714455822814956	0	0	0	0	-0.0437674705050906	0	-0.0238151940938319	0	0	0	0	0	0	0	0	0	-0.0238151940938319	0	0	0	0	0	0	0	0	0	0	0	0	0
1767	0	0	0	0	0	0	0	0	0	0	0	0	0	0	0	0	0	0	0	0	0	0	0	0	0	0	0	0	0	0	0	0	0	0	0	0	0	0	0	0	0	0	0	0	0	0	0	0	0
1768	0	0	0	0	0	0	0	0	0	0	0	0	0	0	0	0	0	0	0	0	0	0	0	0	0	0	0	0	0	0	0	0	0	0	0	0	0	0	0	0	0	0	0	0	0	0	0	0	0
1769	0	0	0	0	0	0	0	0	0	0	0	0	0	0	0	0	0	0	0	0	0	0	0	0	0	0	0	0	0	0	0	0	0	0	0	0	0	0	0	0	0	0	0	0	0	0	0	0	0
1770	0	0	0	0	0	0	0	0	0	0.00197583033151612	0	-0.0021421074052653	0	0	0	0	-0.0021421074052653	0	0	0	0	0	0	-0.0021421074052653	0	0	0	0	0	0	0	0	0	0.00609376806829754	0	-0.0042842148105306	0	0	0	0	-0.0021421074052653	-0.0064263222157959	0	0	0	0	-0.0021421074052653	0.00411793773678142	0
1771	0	0	0	0	0	0	0	0	0	0	0	0	0	0	0	0	-0.0124626121635095	0	0	0	0	0	0	0	0	0	0	0	0	0	0	0	0	0	0	0	0	0	0	0	0	0	0	0	0	0	0	0	0
1772	0	0	0	0	0	-0.0129214507809623	-0.0458347656697605	0.0914261478487841	0.037058209488627	0	-0.0114586914174401	0.0199918641078359	-0.0343760742523204	-0.0572934570872006	0	0.0314505555252761	0	-0.0229173828348803	-0.0114586914174401	-0.0129214507809623	-0.0114586914174401	0.0214546234713581	-0.0229173828348803	0	0	-0.0572934570872006	0	0	0	0	0	0	0	0	0	0	0	0	0	0	0	0	0	0	0	0	0	0	0
1773	0	0	0	0	0	0	0	0	0	0	0	0	0	0	0	0	0	0	0	0	0	0	0	0	0	0	0	0	0	-0.0123839009287926	0	0	0	0	0	0	0	0.026567481402763	0	0	0	0	0	0	0	0	0	0	0
1774	0	0	0	-0.00452652543907297	0	0	0	0	0	0	0	0	0	0	0	0	0	0	0	0	0	0	0	0	0	0	0	0	0	0	0	0	0	0	0	-0.00452652543907297	0	-0.00905305087814593	0	0	0	0.0086617583369424	0	-0.00452652543907297	0	0	0	0	-0.0135795763172189
1775	0	0	0	0	0	0	0	0	0	0	0	0	0	0	0	0	0	0	0	0	0	0	0	0	0	0	0	0	0	0	0	0	0	0	0	0	0	0	0	0.0560538116591928	0	0	0	0	0	0	0	0	0
1776	0	0	0	0	0	0	0	0	0	0	0	0	0	0	0	0	0	0	0	0	0	0	0	0	0	0	0	0	0	0	0	0	0	0	0	0	0	0	0	0	0	0	0	0	0	0	0	-0.181983621474067	0
1777	0	0	0	0	0	0	0	0	0	0	0	0	0	0	0	0	0	0	0	0	0	0	0	0	0	0	0	0	0	0	0	0	0	0	0	0	0	0	0	0	0	0	0	0	0	0	0	0	0
1778	0	0	-0.0209424083769634	0	-0.0418848167539267	-0.0816790764711028	-0.0209424083769634	0	0	0	0.069098896241142	0	0	0	-0.0816790764711028	-0.0209424083769634	0	-0.0209424083769634	0	0.0879507475813544	0.2429098343671	0	0	0	0.0879507475813544	0	0	0	0	0	0	0	0	0	0.00836222814700199	0	0	0.00209055703675051	0	-0.0188518513402128	0	0	0	0	0	0	0	-0.104712041884817	-0.0209424083769634
1779	0	0	0	0	0	0	0	0	0	0	0	0	0	0	0	0	0	0	0	0	0	0	0	0	0	0	0	0	0	0	0	0	0	0	0	0	0	0	0	0	0	0	0	0	0	0	0	0	0
1780	0	0	0	0	0	0	0	0	0	0	0	0	0	0	0	0	0	0	0	0	0	0	0	0	0	0	0	0	0	0	0	0	0	0	0	0	0	0	0	0	0	0	0	0	0	0	0	0	0
1781	0	0	0	0	0	0	0	0	0	0	0	0	0	0	0	0	0	0	0	0	0	0	0	0	0	0	0	0	0	0	0	0	0	0	0	0	0	0	0	0	0	0	0	0	0	0	0	0	0
1782	0	0	0	0	0	0	0	0	0	0	0	0	0	0	0	0	0	0	0	0	0	0	0	0	0	0	0	0	0	0	0	0	0	0	0	0	0	0	0	0	0	0	0	0	0	0	0	0	0
1783	0	0	0	0	0	0	0	0	0	0	0	0	0	0	0	0	0	0	0	0	0	0	0	0	0	0	0	0	0	0	0	0	0	0	0	0	0	0	0	0	0	0	0	0	0	0	0	0	0
1784	0	0	0	0	0	0	0	0	0	0	0	0	0	0	0	0	0	0	0	0	0	0	0	0	0	0	0	0	0	0	0	0	0	0	0	0	0	0	0	0	0	0	0	0	0	0	0	0	0
1785	0	-0.126097861485769	-0.178094390026714	0	0	0	0	0	0	0	-0.0890471950133571	0	0	0.141043723554302	0	0	0	0	0	0	0	0	0	0.141043723554302	0	0	0	0	0	0	0	0	0	0	0	0	0	0	0	0	0	0	0	0	0	0	0	0	0
1786	0	0	0	0	0	0	0	0	0	0	0	0	0	0	0	0	0	0	0	0	0	0	0	0	0	0	0	0	0	0	0	0	0.0609756097560976	0	0	0	0	-0.178306092124814	0	0	0	0	0	0	0.0312579277352952	0	0	-0.0594353640416048	0
1787	0	0	0	0	0	0	0	0	0	0	0	0	0	0	0	0	0	0	0	0	0	0	0	0	0	0	0	0	0	0	0	0	0	0	0	0	0	0	0	0	0	0	0	0	0	0	0	0	0
1788	0	0	0	0	0	0	0	0	0	0	0	0	0	0	0	0	0	0	0	0	0	0	0	0	0	0	0	0	0	0	0	0	0	0	0	0	0	0	0	0	0	0	0	0	0	0	0	0	0
1789	0	0	0	0	0	0	-0.0089814981138854	0	0	0	0	0	0	0	0	0	0	0	0	0	-0.0089814981138854	0	0	0	0	0	0	0	-0.0179629962277708	0	0	0	0	0	0	0	0	0	0	0	0	0	0	-0.0089814981138854	0	0	0	0	0
1790	0	0	0	0	0	0	0	0	0	0	0	0	0	0	0	0	0	0	0	0	0	0	0	0	0	0	0	0	0	0	0	0	0	0	0	0	0	0	0	0	0	0	0	0	0	0	0	0	0
1791	0	0	0	0	0	0	0	0	0	0	0	0	0	0	0	0	0	0	0	0	-0.00496130184560429	0	0	0	0	0	0	0	0	0	0	0	0	0	0	0	0	0	0	0	0	0	0	0	0	0	0	0	0
1792	0	0	0	0	0	0	0	0	0	0	0	0	0	0	0	0	0	0	0	0	0	0	0	0	0.123152709359606	0	0	0	0	0	0	0	0	0	0	0	0	0	0	0	0	0	0	0	0	0	0	-0.0720980533525595	0
1793	0	0	0	0	0	0	0	0	0	0	0	0	0	-0.0273261374504714	0	0	0	0	0	0	0	0	0	0	0	0	0	0	0	0	0	0	0	0	0	0	0	0	0	0	0	0	0	0	0	0	0	0	0
1794	0	0	0	0	0	0	0	0	0	0	0	0	0	0	0	0	0	0	0	0	0	-0.036231884057971	-0.0181159420289855	0	0	0	0	0	0	0	0	0	0	0	0	0	0	0	0	0	0	0	0	0	0	0	0	0	0
1795	0	0	0	0	0	0	0	0	0	0	0	0	0	0	0	0	0	0	0	0	0	0	0	0	0	0	0	0	0	0	0	0	0	0	0	0	0	0	0	0	0	0	0	0	0	0	0	0	0
1796	0	0	-0.0133689839572193	0	0	0	0	0	0	0	0	0	0	0	0	0	0	0	0	0	0	0	0	0	0	0	0	0	0	0	0	0	0	0	0	-0.0133689839572193	0	0	0	0	0	0	0	0	0	0	0	0	0
1797	0	0	0	0	0	0	0	0.0554631170271769	0	0	0	0	0	0	0	0	0	0	0	0	0	0	0	0	0	0	0	0	0	0	0	0	0	0	0	0	0	0	0	0	0	0	0	0	0	0	0	0	0
1798	0	0.173142578957131	0.125156445556946	0	0	0	0	0	0	0	0	0	0	-0.0505816894284269	0	0	0	0	0	0	0	0.250312891113892	0	0	0	0.173142578957131	0	0	-0.0505816894284269	0	0	-0.026588622728335	0	0	0	0	0	0	0	-0.101163378856854	0	0	0	-0.0505816894284269	-0.151745068285281	0	0	0	0
1799	0	0	0	0	0	0	0	0	0	0	0	0	0	0	0	0	0	0	0	0	0	0	0	0	0	0	0	0	0	0	0	0	-0.0059710274438401	0	0	0	0	0	0	-0.0162232316677482	0	0	0	0	0	0	0	0	0
1800	0	0	0	0	0.0141023833027782	0	0	0	0	0	0	0	0	0	0	0	0	0	0	0	0	0	0	0	0	0	0	0	0	0	0	0	0	0	0	0	0	0	0	0	0	0	0	0	0	0	0	0	0
1801	-0.0978792822185971	0	-0.065252854812398	-0.032626427406199	0	0	0	0	0	0	0	-0.032626427406199	0	0	0	0	0	0	0.0421407501053519	0	0	0	0	0	0	0	0	0	0.0421407501053519	0	0	0	-0.065252854812398	0	0	0	0	-0.032626427406199	0	0	0	-0.032626427406199	0	0	0	0	0	0	0
1802	0	0	0	0	0	0	0	0	0	0	0	0	0	0	0	0	0	0	0	0	0	0	0	0	0	0	0	0	0	0	0	0	0	0	0	0	0	0	0	0	0	0	0	0	0	0	0	0	0
1803	0	0	0	0	0	0	0	0	0	0	0	0	0	0	0	0	0	0	0	0	0	-0.0642880102860817	0	0.0231696014828545	0	0	0	0	0.0231696014828545	0	0	0	0.0070975989113341	0	0	0	0	0	0	0	0	0	0	0	0	0	0	0	0
1804	0	0	0	0	0	-0.0298217810269319	0	0	0	0	0	0	0	0	0	0	0	0	0	0	0	0	0	0	0	0	0	0	0	0	0	0	0	0	0	0	0	0	0	0	0	0	0	0	0	0	0	0	0
1805	0	0	0	0	-0.0883782589482987	0	0	0	0.160642570281124	-0.0441891294741494	-0.0883782589482987	0	0	0	0.23290688161395	0	0.401606425702811	-0.0883782589482987	0	0	0.24852392335581	0	0.0803212851405622	-0.0441891294741494	-0.0883782589482987	0.0803212851405622	-0.944085666572606	-0.132567388422448	0	0	0	0.0803212851405622	0	0	-0.0441891294741494	0.397453712330542	0.361321556664128	0	0	0	0	0	1.05979374856917	0	0.028075181858676	0	0	0.140375909293382	-0.0441891294741494
1806	0	0	0	0	0	0	0	0	0	0	0	0	0	0	0	0	0	0	0	0	0	0	0	0	0	0	0	0	0	0	0	0	0	0	0	0	0	0	0	0	0	0	0	0	0	0	0	0	0
1807	-0.051063829787234	0	-0.0170212765957447	0.167728950016773	0	-0.0170212765957447	0	0	0	0	0	0	0	0	0	0	0	-0.0170212765957447	0	0	0	-0.0170212765957447	0	0.0335457900033546	0	0	0	0	0	0	0	0	0	0	0	0	0	0	0	0	0	0	0	0	0	0.0670915800067092	-0.051063829787234	0.0335457900033546	0
1808	0	0	0	0	0	0	0	0	0	0	0	-0.0250501002004008	0	0	0	-0.0250501002004008	0	0	0	0	0	0	0	0	0	0	0	0	-0.0250501002004008	0	0	0	0	0	0	0.0539083557951483	-0.100200400801603	0	0.111624866984643	-0.0250501002004008	0.0539083557951483	-0.0250501002004008	0	0.0539083557951483	0	-0.0250501002004008	0	-0.0250501002004008	0
1809	0	-0.0452079566003617	0	0	0	0	0	0	0	0	0	0	0	0	0	0	0	0	0	0	0	0	0	0	0	0	0	0	0	0	0	0	0	0	0	0	0	-0.0904159132007233	0	0	0	0	0	0	0	0	0	0	0
1810	0	0	0	0	0	0	0	0	0	0	0	0	0	0	0	0	0	0	0	0.246913580246914	0	0	0	0	0	0	0	0	0	0	0	0	0	0	0	0	0	0	0	0	0	0	0	0	0	0	0	0	0
1811	-0.00371650499869922	0	0	0	0	0.021746221593998	0	0	0	0	0	0	0	0	0	0	0	0	0	0	0	0	0	0	0	0	0	0	0	0	0	0	0	0	0	0	0	0	0	0	0	0	0	0	0	0	0	0	0
1812	0	0	0	0	0	0	0	0	0	0	0	0	0	0	0	0	0	0	0	-0.0100664384940608	0	0	0	-0.0201328769881216	0	0	0	0.0151469251741896	0	0	0	0	0	0	-0.0100664384940608	0	0	0	0	-0.0201328769881216	0	0	0	-0.0905979464465472	0	0	0	0	0
1813	0	0	0	0	0	0	-0.0679809653297077	0	0	0	0	0	0	0	0	0	0	0	0	0	0	0	0	0.224971878515186	0	0	0	0.112485939257593	0	0	0	0.201495887113363	0.224971878515186	-0.635304679369192	-0.135961930659415	0	0	0	0	0	0	-0.407885791978246	0	0	0	0	0	0	-0.0679809653297077
1814	0	-0.0291403593977659	0	0	-0.0485672656629432	0	0	0	0	0	-0.0194269062651773	0	0	0.0176014881402877	0	0	0	0	0.0273149412728763	-0.0194269062651773	0	0	0	0	0	-0.00971345313258863	0	0	0	0	0	-0.0194269062651773	0	-0.00971345313258863	0	0	0	0	0	0.0273149412728763	0	0	0	0	0	0	0	0	0
1815	0	0	0	0	0	0	0	0	0	0	0	0	0	0	0	0	0	0	0	0	0	0	0	0	0	0	0	0	0	0	0	0	0	0	0	0	0	0	0	0	0	0	0	0	0	0	0	0	0
1816	0	0	0	0	0	0.0153022188217292	0	0	0.00510073960724305	0	0	0	0	0	0	0.00043416627204309	0	0	0	0	0	0	0	0	0	0	0	0	-0.0364642541375135	0	-0.00933314667039993	0	0	0	0	-0.0139997200055999	0	0	0	-0.0228987004039567	0	0	0	-0.00466657333519996	0	0	0	0	0
1817	0	0	0	0	0	0	0	0	0	0	0	0	0	0	0	0	-0.00844166807361135	0	0	0.0133120340788072	-0.0168833361472227	0	0	0	0	-0.0035713020684155	0	0.0133120340788072	0.689641129317183	-0.00844166807361135	0	0.023052766089199	0	0	0.0012990639367805	0	0	0	0.0181824000840031	0	0	0	0	-0.025325004220834	0	0	0	0	0.0133120340788072
1818	0	0	0	0	0	0	0	0	0	0	0	0	0	0	0	0	0	0	0	0	0	0	0	0	0	0	0	0	0	0	0	0	0	0	0	0	0	0	0	0	0	0	0	0	0	0	0	0	0
1819	0	0	0	0	0	0	0	0	0	0	0	0	0	0	0	0	0	0	0	0	0	0	0	0	0	0	0	0	0	0	0	0	0	0	0	0	0	0	0	0	0	0	0	0	0	0	0	0	0
1820	0	0	0	0	0	0	0	0	0	0	0	0	0	-0.0465766185374942	0	0	0	0	0	0	0	0	0	0	0	0	0	0	0	0	0	0	0	0	0	0	0	0	0	0	0	0	0	0	0	0	0	0	0
1821	0	0	0	0	0	0	0	0	0	0	0	0	0	0	0	0	0	0	0	0	0	0	0	0	0	0	0	0	0	0	0	0	0	0	0	0	0	0	0	0	0	0	0	0	0	0	0	0	0
1822	0.00857118005283933	0	0.00379103798620062	0.377459513063161	0.116698451827333	0.268782035481119	0.233123383717328	0.2548264367532	0.203179907299719	0.584818451753948	3.05906514164658	5.7008184238071	-4.606402335744	-0.023220201393755	-0.0443920442193109	0.0218684313714241	-0.018675338127921	-1.36071886484937	-0.0715335867311568	-0.00879062918928422	0.0183509133225616	-0.0391730038797824	-2.86403409561738	-0.0363710699740199	0	-0.00659297189196317	-0.385798580248068	-0.00439531459464211	-0.0131859437839263	-0.00659297189196317	-0.0128011163119297	-0.0869171878124042	-0.00060427660844149	0	-0.00659297189196317	-0.00719724850040468	-0.325141972468858	0.00478014206663873	-0.00560386781152506	-0.0571390897303474	-0.025987060095856	0.0189551899310031	-0.00219765729732106	0.0191205682665548	-0.0060427660844149	0.0123622180390399	-0.0175812583785684	0.00538441867508018	0.0077474543079529
1823	0	0	0	0	-0.0138280944174153	0	-0.0192678227360308	0.0439753737906772	0	0	0	0	0.0439753737906772	-0.0192678227360308	0	0	0.0439753737906772	0	-0.0192678227360308	0	0	0	0	0	0	0	0	0	0	0	0	0.0686829248453236	0	0	0	0	0	0	0	0	0	0	0	0	0	0	0	0	0
1824	0	0	0	0	0	0	0	0	0	0	0	0	0	0	0	0	0	0	0	0	0	0	0	0	0	0	0	0	0	0	0	0	0	0	0	0	0	0	0	0	-0.0496894409937888	0	0	0	0	0	0	0	0
1825	0	0	0	0	0	0	0	0	0	0	0	0	0	0	0	0	0	0	0	0	0	0	0	0	0	0	0	0	0	0	0	0	0	0	0	0	0	0	0	0	0	0	0	0	0	0	0	0	0
1826	0	0	0	0	0	0	0	0	0	0	0	0	0	0	0	0	0	0	0	0	0	0	0	0	0	0	0	0	0	0	0	0	-0.0121094696052313	0	0	-0.0242189392104626	0	0	0	0	0	0	0	0	0	0	0	0	0
1827	0	0	0	0	0	0	0	0	0	0	0	0	0	0	0	0	0	0	0	0	0	0	0	0	0	0	0	0	0	0.0124120638707183	0	0	0	0	0	0	0	0	0	0	0	0	0	-0.0471994965387036	0	0	0	0	0
1828	0	0	0	0	0	0	0	0	0	0	0	0	0	0	0	0	0	0	0	0	0	0	0	0	0	0	0	0	0	0	0	0	0	0	0	0	0	0	0	0	0	0	0	0	0	0	0	0	0
1829	0	0.0311235605353252	-0.0334840113845639	0	0	-0.0167420056922819	0	0	0	0	-0.0334840113845639	0	0	0	0.0143815548430433	0	0	0.0311235605353252	0	-0.0334840113845639	0.0933706816059757	0.0311235605353252	-0.0334840113845639	0	-0.0334840113845639	0	0	0.0455051153783686	0	0	0.0311235605353252	0	0	0	0	-0.0334840113845639	0	0	0	0.0311235605353252	0	0	0	-0.0334840113845639	0	0	0	0	0
1830	0	0	0	0	0	0	0	0	0	0	0	0	0	0	0	0	0	0	0	0	0	0	0	0	0	0	0	0	0	0	0	0	0	0	0	0	0	0	0	0	0	0	0	0	0	0	0	0	0
1831	0	0	0	0	0	0	-0.335088559119196	0	0	0	0	0	0	0	0	0	0	0	0	0	0	0	0	0	0	0	0	0	0	0	0	0	0	0	0	0	0	0	0	0	0	0	0	0	0	0	0	0	0
1832	0	0	0	0	0	0	-0.0213401621852326	0	0	0	0	0	0	0	0	0	0	0	0	0	0	0	0	0	0	0	0	0	0	0	0	0	0	0	0	0	0	0	0	0	0	0	0	0	0	0	0	0	0
1833	0	0	0	0	0	0	0	0	0	0	0	0	0	0	0	0	0	0	0	0	0	0	0	0	0	0	0	0	0	0	0	0	0	0	0	0	0	0	0	0	0	0	0	0	0	0	0	0	0
1834	0	0	0	0	0	0	0	0	0	0	0	0	0	0	0	0	0	0	0	0	0	0	0	0	0	0	0	0	0	0	0	0	0	0	0	0	0	0	0	0	0	0	0	0	0	0	0	0	0
1835	-0.0105462982493145	-0.021092596498629	0	0	-0.0040422981184073	0	-0.0105462982493145	-0.021092596498629	0	0	0	0.0170502983802217	0	0.0170502983802217	0	0	0	0	0	0	0	0	0	0.0170502983802217	0	0	0	0.0170502983802217	0	0	0	-0.0105462982493145	0	0	0.0170502983802217	0	0	-0.0105462982493145	0	0	0.0170502983802217	0	-0.0105462982493145	0	0	0	0	0.0170502983802217	0
1836	0	0.263157894736842	0	0	0.087719298245614	0.263157894736842	-0.0421052631578947	0	0	-0.126315789473684	-0.0421052631578947	0	0	0	0	0	-0.0421052631578947	0	0	0	0	-0.0842105263157895	0.0456140350877193	0	0	-0.0842105263157895	0	0	0	0	-0.0842105263157895	-0.210526315789474	0.221052631578947	-0.03859649122807	0	-0.0842105263157895	0	0	-0.252631578947368	0	0.263157894736842	0	0	0	0.087719298245614	0	0	0.266666666666666	0.852631578947368
1837	0	0	0	0	0	0	0	0	0	0	0	0	0	0	0	0	0	0	0	0	0	0	0	0	0	0	0	0	0	0	0	0	0	0	0	0	0	0	0	0	0	0	0	0	0	0	0	0	0
1838	0	0	0	0	0.0286532951289398	-0.00797130330809087	0	0	0	0	0	0	0	0	0	0	0	0	0	0	0	0	0	0	0	0	0	0	0	0.0143266475644699	0	0	0	0	0	0	0	0	0	0	0	0	0	0	0	0	0	0	0
1839	0	0	0	0	0	0	0	0	0	0	0	0	0	0	0	0	0	0	0	0	0	0	-0.0285469597487868	0	0	0	0	0	0	0	0	0	0	0	0	0	0	0	0	0	0	0	0	0	0	0	0	0	0
1840	0	0	0	0	0	0	0	0	0	0	0	0	0	0	0	0	0	0	0	0	0	0	0	0	0	0	0	0	0	0	0	0	0	0	0	0	0	0	0	0	0	0	0	0	0	0	0	0	0
1841	0	0	0	0	0	0	0	0	0	0	0	0	0	0	0	0	0	0	0	0	0	0	0	0	0	0	0	0	0	0	0	0	0	0	0	0	0	0	0	0	0	0	0	0	0	0	0	0	0
1842	0	0	0	0	0	-0.100464649001633	0	0	0	0	0	0	0	0	0	-0.136192766578035	-0.0125580811252041	0.171039557824492	0	0.0792407383496439	-0.0115850182255992	-0.043420884203582	-0.0376742433756122	0	0	-0.54087881471372	0	0	0	0	0	-0.0376742433756122	0	0	-0.0125580811252041	-0.0879065678764285	0	0	0	0	0	0	0	0	0	0	0	0	-0.0125580811252041
1843	0	0	0	0	0	0	0	0	0	0	0	0	0	0	0	0	0	0	0	0	0	0	0	0	0	0	0	0	0	0	0	0	0	0	0	0	0	0	0	0	0	0	0.00720876585928489	0	0	0	0	0	0
1844	0	0.052844812400916	0	0	0	0	-0.00954653937947494	0	0	0	0	0	0	0	0	0	0	0	0	0	0	0	0.035229874933944	0	0	0	0	0	0	0	0	0	0	0	0	0	0	0	0	0.017614937466972	0	0	0	0	0	-0.0190930787589499	0	0	0
1845	0	0.0503524672708963	0.0614382401482776	0	0	0	0	-0.0170951486387523	0	0	0	0	0	0	0	0	-0.0281809215161336	0	0	0	0	0	0	-0.0140904607580668	0	0	0	0	0	0	0	0	0	0	0	0	0	0	0	0	0	0	0	0	-0.0281809215161336	0	0	0	0
1846	0	0.407331975560081	0	0	0	0	0	0	0	0	0	0	0	0	0	0	0	0	0	0	0	0	0	0	0	0	0	0	0	0	0	0	0	0	0	0	0	0	0	0	0	0	0	0	0	0	0	0	0
1847	0	0	0	0	0	-0.01573564122738	0	0	0	0	0	0	0	0	0	0	0	0	0	0	0	0	0	0	0	0	0	-0.03147128245476	0	0	0	0	0	0	0	0	0	0	0	0	0	0	0	0	0	0	0	0	0
1848	0	0	0	0	0	0	0	0	0	0	0	0	0	0	0	0	0	0	0	0	0	0	0	0	0	0	0	0	0	0	0	0	0	0	0	0	0	0	0	0	0	0	0	0	0	0	0	0	0
1849	0	0	0	0	0	0	0	0	0	0	0	0	0	0	0	0	0	0	0	0	0	0	0	0	0	0	0	0	0	0	0	0	0	0	0	0	0	0	0	0	0	0	0	0	0	0	0	0	0
1850	-0.0140904607580668	0	0	0	0	0	0	0	0	0	0	0	0	0	-0.00469682025268893	0	0	0	0	0	-0.00469682025268893	0	-0.00939364050537786	-0.0046340009881105	0	0	0.00237981975863369	0	0	0	0.00237981975863369	0	-0.00231700049405524	0	0.00945645976995627	0	0	0.0141532800226452	0	0	0	-0.00469682025268893	0	0	0	-0.0069510014821657	0	0	0.00707664001132262
1851	0	0	0	0	0	0	0	0	0	0	0	0	0	0	0	0	0	0	0	0	0	0	0	0	0	0	0	0	0	0	0	0	0	0	0	0	0	0	0	0	0	0	0	0	0	0	0	0	0
1852	0	0	0	0	-0.0694444444444444	0	0	0.108982157339822	-0.0694444444444444	-0.138888888888889	0	0	-0.117092457420924	-0.138888888888889	0	-0.0694444444444444	0	0	-0.138888888888889	0	0	0	0	0	0	0	0	0	0	0	0	0	0	0	0	0	0	0	0	0	0	0	0	-0.0694444444444444	0	0	0	0	0
1853	0	0	0	0	0	0	0	0	0	0	0	0	0	0	0	0	0	0	0	0	0	0	0	0	0	0	0	0	0	0	0	0	0	0	0	0	0	0	0	0	0	0	0	0	0	0	0	0	0
1854	0	-0.0491859856854136	0	0	0	0	0.00489559086274439	0	0	0	0	0	0	0	-0.00842530963012891	0.0244779543137221	0	0.0266418009857466	0	0.0546494740668532	0	-0.0168506192602578	0	0.158822754279846	0.121253976531219	0.0266418009857466	0.32627171474287	0.0195823634509777	0.011724951339543	-0.0380289318645651	-0.048050190648023	-0.346695823527889	-0.0105891563021534	-0.0407606760552847	0.0133209004928733	-0.0252759288903867	0	-0.1861547864395	-0.052715704452798	-0.0505518577807734	-7.89471040834832	-0.000230077057968986	-0.0913125338360584	0.0133209004928733	-0.354891056100049	-0.00842530963012891	-0.272571729412814	-0.0168506192602578	-1.37139170009696
1855	-0.0234852043212776	0	0	0	0	0	0.0355113636363636	0	0	0	-0.0117426021606388	0	0	0	0.0355113636363636	-0.0234852043212776	0	-0.0352278064819164	0	0	0	0	0	0	0	0	0	0	0	-0.0117426021606388	0	0	0	0	0	0	0	0	0	0	0	-0.0117426021606388	-0.0352278064819164	0.0177556818181818	0	-0.0117426021606388	0	0	0
1856	0	0	0	0	0	0	0	0	0	0	0	0	0	0	0	0	0	0	0	0	0	0	0	0	0	0	0	0	0	0	0	0	0	0	0	0	0	0	0	0	0	0	0	0	0	0	0	0	0
1857	-0.0143647202470732	0	0	0	0	0	-0.139800556307734	0	0	0	-0.061575647897085	0	0	0	-0.0061604957186219	0	0	0	0	0.0187222986125275	0	0	0	0	0	0	0	0	0	0	0	0	0	0	0	0	0	0	0	0	0	0	0	0	0.0330870188596007	-0.0143647202470732	0	0	0
1858	-0.0152578577967653	0	0	0	0	0	0	0	0	-0.0305157155935307	0	0	0	0	0	0	0	-0.0305157155935307	0	0	0	0	0	0	-0.0152578577967653	0	-0.0305157155935307	0.0355871886120996	0	0.0711743772241993	-0.0305157155935307	0	0	0	-0.0152578577967653	0	0	0	0	0	0	0	0	0	0	0	0	0	0
1859	0	0	0	0	0	0	0	0	0	0	0	0	0	0	0	0	0	0	0	0	0	0	0	0	0	0	0	0	0	0	0	0	0	0	0	0	0	0	0	0	0	0	0	0	0	0	0	0	0
1860	0	0	0	0	0	0	0	0	0	0	0	0	0	0	0	0	0	0	0	-0.0312891113892365	-0.0156445556946183	0	0	0	0	0	0	0	0	0	0	0	0	0	0	0	0	0	0	0	0	0	0	0	0	0	0	0	0
1861	0	0	0.0823045267489712	0	0	0	0	0	0	0	0	0	-0.104022191400832	0	0	-0.0346740638002774	0	-0.13869625520111	0	0	0	0	0	0	0	0	0	0	0	0	0	0	0	0.0823045267489712	0	0	0	0	0	0.0823045267489712	-0.0346740638002774	0	0.0476304629486938	0	0	0	0	0	0
1862	0	0	0	0	0	0	0	0	0	0	0	0	0	0	0	0	0	0	0	0	0	0	0	0	0	0	0	0	0	0	0	0	0	0	0	0	0	0	0	0	0	0	0	0	0	0	0	0	0
1863	0.992706315223942	0	-0.194552529182879	0	0.321133777249564	0	0	-0.389105058365759	0	0	-2.47057291242694	0.418410041841004	0	0	-0.0972762645914397	0	0	-0.0972762645914397	0	0	0	0	0	0	0	0	0	0	0	0	0	0	0	0	0	0	0	0.739543819090568	0	0	0	0	0	2.14129886198981	0	0	-0.179900037445257	0	0.014652491737623
1864	0	0	0	0	0	0	0	0	0	0	0	0	0	0	0	0	0	0	0	0	0	0	0	0	0	0	0	0	0	0	0	0	0	0	0	0	0	0	0	0	0	0	0	0	0	0	0	0	0
1865	0	0	0	0	0	-0.0143163668333828	0	0	0	0.113885716305529	0	0	0	0	0	0	0	0	0	-0.0208246563931695	0	0	0.0898069151324652	-0.041649312786339	0	0.887661498623437	-0.0208246563931695	0.350119795542458	0.0032541447798936	0	0	0.059874393751892	-0.041649312786339	-0.0208246563931695	-0.100869137185954	-0.0208246563931695	0	0	0	0	0.165297463431548	-0.0208246563931695	0	0	0	0.407385262875987	0	0	0.480276235747456
1866	0	0	0	0	0	0	0	0	0	0	0	0	0	0	0	0	0	0	0	0	0	0	0	0	0	0	0	0	0	0	0	0	0	0	0	0	0	0	0	0	0	0	0	0	0	0	0	0	0
1867	0	0	0	0	0	0	0	0	0	0	0	0	0	0	0	0	0	0	0	0	0	0	0	0	0	0	0	0	0	0	0	0	0	0	0	0	0	0	0	0	0	0	0	0	0	0	0	0	0
1868	0	0	0	0	0	0	0	0	0	0	0	0	0	0	0	0	0	0	0	0	0	0	0	0	0	0	0	0	0	0	0	0	0	0	0	0	0	0	0	0	0	0	0	0	0	0	0	0	0
1869	0	0	0	0	0	0	0	0	0	0	0	0	0	0	0	0	0	0	0	0	0	0	0	0	0	0	0	0	0	0	0	0	0	0	0	0	0	0	0	0	0	0	0	0	0	0	0	0	0
1870	0	0	-0.00652954619653934	0	0	0	0	0	0	0	0	0	0	0	0	0	-0.00652954619653934	0	0	0	0	0	0	0	0	0	0	0	0	0	0	0	0	0	0	0	0	0	0	0	0	0	0	0	-0.0130590923930787	0	0	0	0
1871	0	0	0	0	0	0	0	0	0	0	0	0	0	-0.0206440957886045	0	0	0	0	0	0	0	0	0	0	0	0	0	0	0	0	0.0378644452858766	0	0	0	0	0	0	0	0	0	0.0550847947831486	0	0	0	0	0	0	0	0
1872	0	0	0	0	0	0	0	0	0	0	0	0	0	0	0	0	0	0	0	0	0	0	0	0	0	0	0	0	0	0	0	0	0	0	0	-0.117096018735363	0	0	0	0	0	0.11001100110011	0	0	0	0	0	-0.0585480093676815	0
1873	0	0	0	0	0	0	0	0	0	0	0	0	0	0	0	0	0	0	0	0	0	0	0	0	0	0	0	0	0	0	0	0	0	0	0	0	0	0	0	0	0	0	0	0	0	0	0	0	0
1874	0	0	0	0	0	0	0	0	0	0	0	0	0	0	0	0	0	0	0	0	0	0	0	0	0	0	0	0	0	0	0	0	0	0	0	0	0	0	0	0	0	0	0	0	0	0	0	0	0
1875	0	0	0	0	0	0	0	0	0	0	0	0	0	0	0	0	0	0	0	0	0	0	0	0	0	0	0	0	0	0	0	0	0	0	0	0	0	0	0	0	0	0	0	0	0	0	0	0	0
1876	0	0	0	0	0	0	0	0	0	0	0	0	0	0	0	0	0	0	0	0	0	0	0	0	0	0	0	0	0	0	0	0	0	0	0	0	0	0	0	0	0	0	0	0	0	0	0	0	0
1877	0	0	0	0	0	0	0	0	0	0	0	0	0	0	0	0	0	0	0	0	0	0	0	0	0	0	0	0	0	0	0	0	0	0	0	0	0	0	0	0	0	0	0	0	0	0	0	0	0
1878	0	0	0	0	0	0	0	0	0	0	0	0	0	0	0	0	0	0	0	0	0	0	0	0	0	0	0	0	0	0	0	0	0	0	0	0	0	0	0	0	-0.00826787928896238	0	0	0	0	0	0	0	0
1879	0	0	0	0	0	0	0	0	0	0	0	0	0	0	0	0	0.0204960032793605	0	-0.0323676970383557	0	0	0	0	0	0	0	0	0	0	0	0	0	0	0	0	0	0	0	0	0	0.0043121547601826	0	0	-0.0161838485191779	0	-0.0323676970383557	-0.0161838485191779	0	0.0204960032793605
1880	0	0	0	0.0812017864393017	0	0	0	0	-0.0270489586150933	0	0	0	0	-0.0270489586150933	0	0	0	0	0	0	0	0	0	0	0	0	0	0	0	0	0	0	0	0	0	0	0	0	0	0	0	0	0	0	0	0	0	0	0
1881	0	0	0	0	0	0	0	0	0	0	0	0	0	0	0	0	0	0	0	0	0	0	0	0	0	0	0	0	0	0	0	0	0	0	0	0	0	0	0	0	0	0	0	0	0	0	0	0	0
1882	0	-0.0145496871817256	0	-0.0145496871817256	0	0	0	0	0	0	0	0	0	0	0	0	0	0	0	0	0	0	0	0	0	0	0	0	0	0	0	0	0	0.10183299389002	0	0	0	0	0	0	0	0.0254582484725051	0	0	0	-0.0145496871817256	0	0	-0.0145496871817256
1883	0	0	0	0	0	0	0	0	0	0	0	0	0	0	0	0	0	0	0	0	0	0	0	0	0	0	0	0	0	0	0	0	0	0	0	0	0	0	0	0	0	0	0	0	0	0	0	0	0
1884	0	0	0	0	0	0	0	0	0	0	0	0	0	0	0	0	0	0	0	0	0	0.097698086789338	0	0	1.10759328338715	0.0720980533525595	0	0	0	0	0	0	0	0	0	0	0	0	0	0	0	0	0	0	0	0	0	0	0
1885	0	0	0	0	0	0	0	0	0	0	0	0	0	0	0	0	0	0	0	0	0	0	0	0	0	0	0	0	0	0	0	0	0	0	0	0	0	0	0	0	0	0	0	0	0	0	0	0	0
1886	0	0	0	0	0	0	0	0	0	0	0	0	0	0	0	0	0	0	0	0	0	0	0	0	0	0	0	0	0	0	0	0	0	0	0	0	0	0	0	0	0	0	0	0	0	0	0	0	0
1887	0	0	0	0	0	0	0	0	0	0	0	0	0	0	0	0	0	0	0	0	0	0	0	0	0	0	0	0	0	0	0	0	0	0	0	0	0	0	0	0	0	0	0	0	0	0	0	0	0
1888	0	0.0031716183169418	-0.0166444740346205	0	-0.059042041571084	0	-0.00832223701731025	0	0	0	0	0.0180992194514394	0.0149276011344977	0	0	0	0	0	0	-0.0166444740346205	-0.0582556591211718	0	0	0	0	0.0281383293688726	0	-0.0166444740346205	0	0	0	0	0	0	0	0	-0.0849392430732253	0	0	0	0	0.0149276011344977	0	0	-0.011349747333952	0	0	0.0149276011344977	-0.25507985670298
1889	0	0	0	0	0	0	0	0	0	0	0	0	0	-0.0818598559266536	0	0	0	0	0	0	0	0	0	0	0	0	0	0	0	0	0	0	0	0	0	0	0	0	0	0	0	0	0	0	0	0	0	0	0
1890	0	0	0	0	0	0	0	0	0	0	0	0	0	0	0	0	0	0	0	0	0	0	0	0	0	0	0	0	0	0	0	0	0	0	0	0	0	0	0	0	0	0	0	0	0	0	0	0	0
1891	0	0	0	0	0	0	-0.001530678626369	0	-0.0007653393131845	0	0	0	0	0	0.00196028463332876	0	0	0	0	0.00119494532014426	0	0	0	-0.0007653393131845	0	0	0	0	0	0	0	0	0	0	0	-0.001530678626369	0	0	0	0	0	0	0	0	0	0	0	0	0
1892	0	0	0	0	0	0	0	0	0	0	0	0	0	-0.0287935502447452	0	0	-0.0143967751223726	0	0	0	0	0	0	0.0245218244237371	0	0	0	0	0	0	0	-0.0287935502447452	0	0	0	0	0	0	0	0	0	0	0	0	0	0	0	0	0
1893	0	0	0	0	0	0	0	0	0	0	0	0	0	0	0	0	0	0	0	0	-0.06765899864682	0	0	0	0	0	0	0	0	0	0	0	0	0	0	0	0	0	0	0	0	0	0	0	0	0	0	0	0
1894	0	0	0	0	0	0	0	0	0	0	0	0	0	0	0	0	0	0	0	0	0	0	0	0	0	0	0	0	0	0	0	0	0	0	0	0	0	0	0	0	0	0	0	0	0	0	0	0	0
1895	0	0	0	0	0	0	0	0	0	0	0	0	0	0	0	0	0	0	0	0	0	0.0371816322736568	0	0	0	0	0	-0.0279694201006899	0	0	0	0.0743078006170154	-0.0279694201006899	0	0	0	0	-0.0280248840309881	-0.0093231400335633	0	0	0.0557724484104852	0	-0.000110927860596403	0	-0.000110927860596403	0	0	0
1896	0	0	0	0	0	0	0	0	0	0	0	0	0	0	0	0	0	0	0	0	0	0	0	0	0	0	0	0	0	0	0	0	0	0	0	0	0	0	0	0	0	0	0	0	0	0	0	0	0.022436616558223
1897	0	0	0	0	0	0	0	0	0	0	0	0	0	0	0	0	0	0	0	0	0	0	0	0	0	0	0	0	0	0	0	0	0	0	0	0	0	0	0	0	0	0	0	0.00872376864907259	0	-0.00625586487331874	0	0	0
1898	0	0	0	0	0	0	0	0	0	0	0	0	0	0	0	0	0	0	0	0	0	0	0	0	0	0	0	0	0	0.0187828700225394	0	0	0	-0.0225292880744968	0	0	0	0	0	0	0	0	0	0	0	0	0	0	0
1899	0	0	0	0	0	0	0	0	0	0	0	0	0	0	0	0	0	0	0	0	0	0	0	0	0	0	0	0	0	0	0	0	0	0	0	0	0	0	0	0	0	0	0	0	0	0	0	0	0
1900	0	0	0	0	0	0	0	0	0	0	0	0	0	0	0	0	0	0	0	0	0	0	0	0	0	0	0	0	0	0	0	-0.037243947858473	0	0	0	0	0	0	0	0	0	0	0	0	0	0	0	0	0
1901	0	0	0	0	0	0	0	0	0	0	0	0	0	0	0	0	-0.0288350634371396	0	0	0	0	0	0	0	0	0	0	0.217391304347826	0	0	0	0	0	0	0	0	0	0	0	0	0	0	0	0	0	0	0	0	0
1902	0	0	0	0	0	0	0	0	0	0	0	0	0	0	0	0	0	0	0	0	0	0	0	0	0	0	0	0	0	0	0	0	0	0	0	0	0	0	0	0	0	0	0	0	0	0	0	0	0
1903	0	0	0	0	0	0	0	0	0	0	0	0	0	0	0	0	0	0	0	0	0	0	0	0	0	0	0	0	0	0	0	0	0	0	0	0	0	0	0	0	0	0	0	0	0	0	0	0	0
1904	0	0	0	0	0	0	0	0	0	0	0	0	0	0	0	0	0	0	0	0	0	0	0	0	0	0	0	0	0	0	0	0	0	0	0	0	0	0	0	0	0	0	0	0	0	0	0	0	0
1905	0	0	0	0	0	0	0	0	0	0	0	0	0	-0.0088944231966557	0	0	0	0	0	0	0	0	-0.088944231966557	0	0	0	0	0	-0.0088944231966557	0	0	0	0	-0.0088944231966557	0	0	0	0	0	0	0	0	0	0	0	0	0	0	0
1906	-0.0096237128284092	0	0	0	0	0	0	0	0	0	0	0	0	0	-0.0096237128284092	0	0.0540443163393983	0	0.0180147721131328	0	-0.0096237128284092	0.0180147721131328	0	-0.0096237128284092	0	0	0.0180147721131328	0	0	0	0.0264058313978563	0	0	0	0	0	0	0	0	0	0	0	0	0	0	0	0	0	0
1907	0	0	0	0	0	0	0	0	0	0	0	0	0	0	0	-0.0186081131373279	0	0	0	0	0	0	0	0	0	0	0	0	0	0	0	0	0	0	0	0	0	0	0	0	0	0	0	0	0	0	0	0	0
1908	0	0	0	0	-0.0075993616536211	0	0	0	0	0	0	0	0	0	0	0	0	0	0	0	0	0	0	0	0	0	0	0	0	0	0	0	0	0	0	0	0	0	-0.0151987233072422	0	0	-0.0075993616536211	0	0	0.0111049416990561	0	0	0	0
1909	0	0	0	0	0	0	-0.0212404418011895	0	0	0	0	0	0	0	0	0	0	0	0	0	0	0	0	0	0	0	0	0	0	0	0	0	0	0	0	0	0	0	0	0	0	0	0	0	0	0	0	0	0
1910	0	0	0	0	0	0	0	0	0	0	0	0	0	0	0	0	0	0	0	-0.0228050171037628	0	0	0	0	0	0	0	0	0	0	0	0	0	0	0	0	0	0	0	0	0	0	0	0	0	0	0	0	0
1911	0	0	0	0	0	0	-0.0212224108658744	0	0	0	0	0	0	0	0	0	0	-0.00707413695529145	0	0	0	0	0	0	0	0	0	0	0	0	0	0	0	0	0	0	0	0	0	0	0	0	0	0	0	0	0	0	0
1912	0	0	0	0	0	0	0.0146756677428823	-0.00906453952139231	-0.0194247734210993	-0.0271936185641769	0	0	0	0	0	0	-0.0125179508212946	0	0	-0.00906453952139231	0	-0.0181290790427846	0	0	0	-0.0034534112999023	0	-0.0543872371283539	0	-0.00906453952139231	0	0	0	0	0	0	0	-0.00906453952139231	0	0	0	-0.0271936185641769	-0.00906453952139231	0	0	0	0.0146756677428823	0	0
1913	0	-0.0350508236943568	0	0	0	0	0	0	0	0	0	0	0	0	0	0	0	0	0	0	0	0	0	0	0	0	0	0	0	-0.0350508236943568	0	0	0	0	0	0	0	0	0	0.0863557858376511	0	0	0	0	0	0	0	0.172711571675302	0
1914	0	0	0	0	0	0	0	0	0	0	0	0	0	0	0	0	0	0	0	0	0	0	0	0	0	0	0	0	0	0	0	0	0	0	0	0	0	0	0	0	0	0	0	0	0	0	0	0	0
1915	0	0	0	0	0	0	0	0	0	0	0	0	0	0	0	0	0	0	0	0	0	0	0	0	0	0	0	0	0	0	0	0	0	0	0	0.133511348464619	0	0	0	0	0	0	-0.134680134680135	0	0	0	-0.269360269360269	0	0
1916	0	0	0	0	0	-0.0114744693057946	0.0135407530505163	-0.0114744693057946	0	0	0	0	0	0	0	0	0	0	0	0	0	0	0.0182448458310527	0	-0.0229489386115892	0	-0.0114744693057946	0	0	0	0	0	0	0	-0.0114744693057946	0	0	0	0	0	0	0	0	-0.0114744693057946	0	0	-0.0229489386115892	0	0
1917	0	0	0	0	0	0	0	0	0	0	-0.00497561946462335	0	0	0	-0.00497561946462335	0	0	0	-0.00497561946462335	0.00839066957543212	0	0	0	0	0	0	0	0	0	0	0	-0.00497561946462335	0	0	0	0	0	0	0	0	0	0	0	0	0	0	0	0	0
1918	0	0	0	0	0	0	0	0	0	0	0	0	0	-0.0678886625933469	0	0	0.0551267916207277	0	0	-0.772299030472055	0	0	0	0	-0.025523741945239	0	0	0	0.0551267916207277	0	0	0	-0.0678886625933469	0	0	0	0	0	0	0	0	0	0	-0.0127618709726192	0	0	0	0	0
1919	0	0	0	0	0	0	0	0	0	0	0	0	0	0	0	0	0	0	0	0	0	0	0	0	0	0	0	0	0	0	0	0	0	0	0	0	0	0	0	0	0	0	0	0	-0.00447547440028643	0	0.00495848786386451	0	0
1920	0	0	0	0	0	0	0	0	0	0	0	0	0	0	0	0	0	0	0	0	0	0	0	0	0	0	0	0	0	0	0	0	0	0	0	-0.037252177697413	0	0	-0.0789622924002281	0	0	0	0	0	-0.0208550573514077	0	0	-0.0417101147028154	0
1921	0	0	0	0	0	0	0	0	0	-0.0614628149969269	0	0	0	0.100806451612903	0	0.100806451612903	0	0	0	0	0	0	0	0	0	0	-0.0614628149969269	0	0	0	0	0	0	0	0	0	0	0	0	0	0	0	0	0	0	0	0	0	0
1922	0	0	0	0	0	0	0	0	0	0	0	0	0	0	0	0	0	0	0	0	0	0	0	0	0	0	0	0	0	0	0	0	0	0	0	0	0	0	0	0	0	0	0	0	0	0	0	0	0
1923	0	0	0	0	0	0	0	0	0	0	0	0	0	0	0	0	0	0	0	0	0	0	0	0	0	0	0	0	0	0	0	0	0	0	0	0	0	0	0	0	0	0	0	0	0	0	0	0	0
1924	0	0	0	0	0	0	0	0	0	0	0	0	0	0	0	0	0	0	0	0	0	0	0	0	0	0	0	0	0	0	0	0	0	0	0	0	0	0.160771704180064	0	0	0	0	0	0	0	0	0	0	0
1925	0	0	0	0	0	0	0	0	0	0	0	0	0	0	0	0	0	0	0	0	0	0	0	0	0	0	0	0	0	0	0	0	0	0	0	0	0	0	0	0	0	0	0	0	0	0	0	0	0
1926	0	0	0	0	0	0	0	0	0	0	0	0	0	0	0	0	0	0	0	0	0	0	0	0	0.0132013201320132	0	0	0	0	0	0	0	0	0	0	0	0	0	0	0	0	0	0	0	0	0	0	0	0
1927	0	0	0	0	0	0	0	0	0	0	0	0	0	0	0	0	0	0	0	0	0	0	0	0	0	0	0	0	0	0	0	0	0	0	0	0	0	0	0	0	0	0	0	0	-0.0244379276637341	0	-0.0122189638318671	0	0
1928	0	0	0	0	0	0	0	-0.0685714285714286	0	0	0	0	0	0	0	0	0	0	0	0	0	0	0.0039186040490861	0	0	0	0	0	-0.0457142857142857	-0.0228571428571429	0.109389530368146	0.0362450163102573	0	0	-0.0228571428571429	0	0	0	0.0133878734531144	0	0	0	0.170123750841402	0	0	0	0	0	0.0401636203593434
1929	0	0	0	0	0	0	0	0	0	0	0	0	0	0	0	0	0	0	0	0	0	0	0	-0.0786782061369001	0	0	0	0	-0.0786782061369001	0	0	0	0	0.27972027972028	0	0	0	0	0	0	0	0.27972027972028	0	0	0	0	0	0	0
1930	0	0	0	-0.00616218880946512	0	0	0	0	0	0	0	0	-0.0057042405574938	-0.0123243776189302	0	0	0	0	0	0	0	0	0	0	0	0	0	0	0	0	0	0	0	0	0	0	0	0	0	0	0	0	0	0	0	0	0	0	0
1931	0	0	0	0	0	0	0	0	0	0	0	0	0	0	0	0	0	0	0	0	0	0	0	0	0	0	0	0	0	0	0	0	0	0	0	0	0	0	0	0	0	0	0	0	0	0	0	0	0
1932	0	-0.103573278094252	0	-0.0517866390471258	0	0	0	0	0	0	0	-0.103573278094252	0.0341240138738364	0	-0.0176626251732898	0	0	0	-0.0517866390471258	0	0	0	0	0	0	0	0	0	0	0	0	0	0	0	0	0	0	-0.0517866390471258	0	0	0	0	0	0	0	0	-0.103573278094252	0	0
1933	0	0	0	0	0	0	0	0	0	0	0	0	0	0	0	0	0	0	0	0	0	0	0	0	0	0	0	0	0	0	0	0	0	0	0	0	0	0	0	0	0	0	0	0	0	0	0	0	0
1934	0	0	0	0	0	0	0	0	0	0	0	0	0	0	0	0	0	0	0	0	0	0	0	0	0	0	0	0	0	0	0	0	0	0	0	0	0	0	0	0	0	0	0	0	0	0	0	0	0
1935	0	0	0	0	0	0	0	0	0	0	0	0	0	0	0	0	0	0	-0.0135943447525829	0	0	0	0	0	0	0	0	0	0	0	0	-0.0135943447525829	0	0	0	0	0	0	0	0.0342935528120713	0	0	0	-0.0271886895051659	0	0	0.0342935528120713	0	0
1936	0	0	0	0	-0.0665335994677312	0	0	0	0	0	0	0	0	0	0	0	0	0	0	0	0	0	0	0	0	0	0	0	0	0	0	0	0	0	0	0	0	0	0	0	0	0	0	0	0	0	0	0	0
1937	0	0	0	0	0	0	0	0	0	0	0	0	0	0	0	0	0	0	0	0	0	0	0	0	0	0	0	0	0	0	0	0	0	0	0	0	0	0	0	0	0	0	0	0	0	0	0	0	0
1938	0	0	0	0	0	0	0	0	0	0	0	0	-0.0131856540084388	0	0	0	0	0	0	0	0	0	0	0	0	0	0	0	0	0	0	0	0	0	0	0	0	0	0	0	0	0	0	0	0	0	0	0	0
1939	0	0	0	0	-0.132890365448505	0	0	-0.199335548172757	0	0	0	0	0	0	0	0	-0.0664451827242525	0	0	0	0	0	0	0	0	0	0	0	0	0	0	0	0	0	0	0	0	0	-0.199335548172757	0	0	0	0	0	0	0	0	0	0
1940	0	-0.0261301280376274	0	-0.130650640188137	0	0.068749227263636	0.04510599909788	0	-0.0522602560752548	-0.0261301280376274	0	-0.0522602560752548	0.04510599909788	-0.0261301280376274	0	0	0	0	0	0	0	0.09021199819576	0.04510599909788	0	0	0.31574199368516	-0.0261301280376274	0	0	-0.0261301280376274	0.04510599909788	0	0	0	-0.10452051215051	-0.0522602560752548	0	0.0640818701581326	0	0	0	0	0	0	0	0	-0.0783903841128822	0	-0.0522602560752548
1941	0	0	0	0	0	0	0	-0.222882615156018	0	0	0	0	0	0	0	0	0	0	0	0	0	0	0	0	0	0	0	0	0	0	0	0	0	0	0	0	0	0	0	0.111856823266219	0	0	0	0	0	0	0	0	-0.0742942050520059
1942	0	0	0	0	0	0	0	0	0	-0.00344530577088717	0	-0.00344530577088717	0	-0.00344530577088717	0	0	0	0	0	-0.00344530577088717	0	-0.00344530577088717	0	0	0	0	0	-0.00344530577088717	0	-0.00344530577088717	0	0	0	0	0	0	0	0	0	0	0	0.0120569086086327	0	0	0	0	0	0	0
1943	0	0	0	0	0	0	0	0	0	0	0	0	0	0	0	0	0	0	0	0	0	0	0	0	0	0	0	0	0	0	0	0	0	0	0	0	0	0	0	0	0	0	0	0	0	0	0	0	0
1944	0	0	0	0	0	0	0	0	0	0	0	0	0	0	0	0	0	0	0	0	0	0	0	0	0	0	0	0	0	0	0	0	0	0	0	0	0	0	0	0	0	0	0	0	0	0	0	0	0
1945	0	0	0	0	-0.0140429714927679	0	0	0	0	0	0	0	0	0	0	0	0	0	0	0	0	0	0	0	0	0	0	0	0	0	0	0	0	0	0	0	0	0	0	0	0	0	0	0	0	0	0	0	0
1946	0	0	0.600115099680978	0	0	0.0029939223376545	0	0	0.268455036276359	0	0	0	-0.165996360721069	0	0	-0.08482779956688	0.132730556969352	2.62068001956029	0	0	-0.0844951415293621	-0.253485424588086	-0.042247570764681	0	0	0	0	0.226207465511678	0	0	0	-0.14304295613238	-0.0844951415293621	0	0	0	6.34279080133997	-0.036259726089372	0.6935920082233	-0.168990283058724	0	-0.126742712294043	0	0	-0.123748789956388	0	0	-0.042247570764681	0.68128366083517
1947	0	0	-0.099304865938431	0.0854700854700855	0	0	0.0854700854700855	0	0	0	0	0	-0.099304865938431	0	0	-0.148957298907646	0	0	0	0	0	0.0854700854700855	0	0	0	-0.099304865938431	0	0	0.170940170940171	0	0.157105390471825	0.170940170940171	0	-0.0496524329692155	0	-0.099304865938431	0	-0.297914597815293	-0.0496524329692155	0.170940170940171	-0.198609731876862	-0.289766506251114	0.28654122000696	0.157105390471825	0.0854700854700855	0	-0.099304865938431	0	0
1948	0	0	0	0	0	0	0	0	0	0	0	0.0425531914893617	-0.0302053966975433	0	0	0	0	0	0	0	-0.0100684655658478	0	0	0	0	0	0	0	0	0	0	0	0	0	0	0	-0.0100684655658478	0	0	0	0	0	0	0	0	0	0	0	0
1949	0	0	0	0	0	0	0	0	0	0	0	0	0	0	0	0	0	0	0	0	0	0	0	0	0	0	0	0	0	0	0	0	0	0	0	0	0	0	0	0	0	0	0	0	0	0	0	0	0
1950	0	0	0	0	0	0	0	0	0	0	0	0	0	0	0	0	-0.013550135501355	0	-0.013550135501355	0	0	0	-0.02710027100271	0	0	0	0	0	0.0245579567779961	-0.013550135501355	-0.02710027100271	0.182913518722614	-0.0542005420054201	0	-0.013550135501355	-0.005084628449428	-0.124493533736909	-0.02710027100271	0.0245579567779961	0	0	0	0	0	0	0	0	0	0
1951	-0.0739370273136345	0	0	0	0	0	0	0	0	0	0	0	0.0288101411696917	0	0	0	0	0	0	0	0	0	0	0	0	0	0	0	0	0	0	0	0	0	0	0	0	0	0	0	0	0	0	0	0	0	0	0	0
1952	0	0	0	0	0	0	0	0	0	0	0	0	0	0.0541125541125541	0	0	0	0	0	0	0	0	0	0	0	0	0	0	0	0	0	0	0	0	0	0	0	0	0	-0.0338983050847458	0	0	-0.0338983050847458	0	0	0	0	0	0
1953	0	0	0	-0.28169014084507	-0.112676056338028	-0.338028169014085	0	0	0	-0.338028169014085	0	0	0	-0.338028169014085	0	0	-0.0563380281690141	0	0	0	0	0	0	0	0	0	0	0	0	0	0	0	0	0	0	0	0	0	0	0	0	0	0	0	0	0	-0.0563380281690141	0	0
1954	0	0	0	0	0	0	0	0	0	0	0	0	0	0	0	0	0	0	0	0	0	0	0	0	0	0	0	0	0	0	0	0	0	0	0	0	0	0	0	0	0	0	0	0	0	0	0	0	0
1955	0	0	0	0	0	0	0	0	0	-0.0111569786901707	0	0	0	0.0258131130614352	0	0	0	0	0	0	0	0	0	0	0	0	0	0	0	0	0	0	0	0	0	0	0	0	0	0	0	0	0	0	0	0	0	0	0
1956	0	0	0	0	0	0	0	0	0	0	0	0	0	0	0	0	0	0	0	0	0	0	0	0	0	0	0	0	0	0.0259388213147141	0	0.0259388213147141	0	0	0	0	0	0	0	0	0	0	0	0	0	0	0	0	0
1957	-0.031201248049922	0.059770488979068	0	0.534177808830145	0	0.773259764746416	-0.031201248049922	0.025937233808371	0	0	-0.218408736349454	0	-0.062402496099844	0	0	-0.15600624024961	0	0	0.0766871165644172	0	0	0	0	0	0.0142846204645732	0	0	0	0	0	0	0	-0.127436999320464	0	0	0	-0.062402496099844	0.153374233128834	-0.062402496099844	0.153374233128834	0	0	0	-0.0169166275853488	0	0	0	0	0
1958	0	0	0	0	0	0	0	0	0	0	0	0	0	0	0	0	0	0	0	0	0	0	0	0	0	0	0	0	0	0	0	0	0	0	0	0	0	0	0	0	0	0	0	0	0	0	0	0	0
1959	0.203458799593082	0	0	0	0	0	0	0	0	0	0	0	0	0	0	0	0	0	0	0	0	0	0	0	0	0	0	0	0	0	0	0	0	0	0	0	0	0	0	0	0	0	0	0	0	-0.0440140845070423	0	0	0
1960	0	0	0	0	0	0	0	0	0	0.0777907429015947	0	0	0	0	0	0	0	0	0	-0.0196001568012544	0	0	-0.0588004704037632	0	0	0	0	0	0	0	0	0	0	0	0	0	0	0	0	0	0	0	0	0.116686114352392	0	-0.0196001568012544	0	0	0
1961	0	0	0	0	0	0	0	0	0	0	0	0	0	0	0	0.0588235294117647	0	0	0	-0.0366300366300366	0	0	0	0	0	0	0	0	0	0	0	0	0.0588235294117647	0	0	0	0	0	0	0	0	0	0	0	0	-0.10989010989011	0	0	0.117647058823529
[truncated: 2,431 more rows]
[truncated: 352 more columns]
