# Supplementary material for: Ssl2/TFIIH function in transcription start site scanning by RNA polymerase II in Saccharomyces cerevisiae
Source: eLife. 2021 Oct 15;10:e71013. doi: 10.7554/eLife.71013 (PMC8589449; doi:10.7554/eLife.71013)
Supplement: Figure 4—source data 3. [file elife-71013-fig4-data3.csv]

	ssl2 L225P	ssl2 N230D	ssl2 N230I	ssl2 D522V	ssl2 R636C	ssl2 Y750	rpb1 E1103G	rpb1 H1085Y
2	0	0	0	0	0	0	-7	0
4	0	0	0	0	0	0	-19	0
5	1	-13	-2	-13	6	-13	-21	25
6	-4	9	-4	12	18	12	12	27
8	0	-13	0	0	0	0	-16	0
9	-1	-8	0	-8	0	-8	-8	2
10	1	-3	1	-1	1	-3	-3	10
11	0	-9	0	-9	0	-9	-17	0
13	2	-7	2	-7	2	-7	-9	11
14	6	-7	6	-7	6	-7	-9	6
15	31	-1	31	-1	31	2	-1	31
17	0	-4	0	-3	0	-3	-15	6
19	5	-10	5	-10	5	-4	-10	5
20	0	-9	0	-7	0	-1	-9	0
22	0	0	0	0	0	0	0	7
23	0	-7	3	-7	0	-5	-7	0
24	18	0	8	0	0	0	0	8
25	0	0	0	0	0	1	0	0
26	0	-6	0	-6	0	-2	-6	0
27	0	-10	4	-1	4	0	-4	4
28	3	-9	3	-9	2	-2	-24	3
29	0	-6	0	0	0	-6	-8	0
30	0	-3	0	-3	0	0	-10	0
32	2	0	2	0	0	0	-6	2
33	0	-2	0	0	0	0	-17	0
34	6	-6	10	-7	6	-2	-6	11
36	15	-7	14	-7	-10	17	-10	-10
37	3	-6	3	-4	0	-4	-8	0
38	5	0	1	0	0	0	-6	8
39	3	-3	3	0	3	0	-3	6
42	0	0	0	2	0	2	-18	0
43	6	-14	10	-8	1	-8	-14	10
44	0	0	0	0	2	0	0	13
45	0	-10	0	-10	0	-10	-11	0
46	7	-10	0	0	0	-9	-9	9
47	0	-12	0	-11	15	0	-18	17
48	0	0	0	0	0	0	-6	0
50	0	0	0	-4	0	0	0	8
51	3	-4	5	-4	3	-4	-15	26
52	4	-2	7	0	7	0	-9	0
53	0	-5	1	-2	0	-4	-7	0
54	30	-16	30	-16	30	-15	-14	37
55	0	0	2	0	0	0	0	2
56	0	-6	0	-6	0	0	-3	0
57	-2	-3	0	0	0	-3	-3	13
58	0	-9	0	-2	0	-9	-11	1
59	9	-9	9	-5	7	0	-9	9
61	0	-18	0	-24	0	-4	-8	0
62	-5	-5	0	-5	0	0	-7	0
63	16	0	11	0	16	0	-2	19
64	0	0	0	0	0	0	0	0
65	0	-5	0	-5	0	0	0	6
66	6	-16	6	-2	6	-16	-16	6
67	0	0	0	0	0	0	-7	3
68	44	-9	0	-8	36	-9	-20	46
69	0	0	0	0	0	0	0	2
70	0	-9	0	-4	0	-2	-14	0
71	0	0	0	0	3	0	0	3
72	0	-7	0	-5	0	-7	-7	10
73	0	-21	0	-15	0	-15	-21	0
74	1	-12	1	-9	0	-9	-9	1
75	0	0	-12	0	1	0	-10	0
76	0	2	0	0	0	2	0	2
77	0	-6	0	-6	0	-6	-8	0
78	0	0	9	0	7	0	0	9
79	0	-13	2	-7	2	-7	-17	12
80	-1	-6	0	-1	0	-6	-8	7
82	0	-9	0	-9	0	-4	-11	0
84	0	-10	3	-10	0	-3	-10	3
85	0	-5	0	-5	0	-5	-5	3
86	1	-9	4	0	0	-4	-65	4
88	-2	-6	2	-12	1	-2	-33	2
89	0	-10	0	-10	0	-2	-10	0
90	0	-6	5	0	0	0	-3	14
91	5	0	5	0	5	0	5	5
92	5	0	5	0	1	0	-7	27
93	1	-9	1	-4	1	-1	-9	1
94	3	0	3	0	1	0	0	5
96	0	0	0	0	0	4	0	0
97	0	-2	0	-2	0	0	-11	4
98	15	12	12	8	12	9	-19	15
99	0	-10	0	-11	0	0	-11	0
100	4	-7	4	-7	0	0	-11	9
102	0	0	0	0	0	0	0	0
103	0	-8	3	0	0	0	-10	3
105	0	0	0	0	0	0	0	0
106	3	0	3	0	3	0	3	3
107	0	-4	0	-4	0	0	-6	8
110	24	0	18	0	0	0	-6	0
111	0	-3	0	-3	0	-3	-11	13
113	1	-5	1	-5	1	-5	-5	11
114	2	0	0	0	2	0	-15	11
115	0	-5	0	-7	0	-2	-7	0
116	2	-15	2	-15	2	-6	-18	2
117	2	-3	13	-3	10	0	-3	24
118	8	0	8	0	3	0	-8	8
119	0	-4	1	-3	1	-3	-5	1
122	0	-1	5	-1	0	0	-5	6
123	0	0	8	0	0	0	0	23
124	0	0	0	0	-3	-3	-16	0
125	1	0	0	0	1	0	-8	9
126	1	-3	3	-3	1	-2	-3	3
127	0	-8	0	-8	3	-3	-8	11
128	109	-12	104	48	102	-21	15	98
129	7	-14	12	-14	0	-14	-18	10
130	7	-10	36	-10	7	-7	-14	44
132	0	-8	0	-8	0	0	-10	0
135	0	-1	0	-1	0	-1	-2	8
136	9	0	4	-3	14	0	0	18
139	0	-3	0	0	0	0	-6	0
142	-6	-6	0	-6	2	-6	-6	2
144	0	-6	0	-12	0	-6	-13	0
145	0	-13	0	-5	1	-8	-13	0
146	2	-8	2	-8	2	-6	-13	7
147	0	-17	0	-16	0	-10	-49	0
149	3	-5	0	0	0	0	-6	10
150	0	-8	-7	-9	0	-4	-8	13
151	53	7	22	51	-1	3	-13	-8
152	1	-5	1	-5	1	-5	-5	7
154	13	-27	17	-27	13	-18	-28	29
155	0	-4	0	0	0	0	-5	0
156	3	-5	3	0	0	0	-10	9
159	0	0	0	0	0	0	0	0
160	0	-3	0	-3	0	-3	-3	0
162	0	0	0	0	0	0	-12	0
163	0	0	6	0	0	0	0	0
164	5	-13	5	-13	5	-12	-20	6
165	6	-4	10	-4	0	-3	-4	10
166	0	-4	4	-4	3	0	-4	8
167	0	-5	0	-5	0	-3	-5	6
168	7	0	0	1	3	0	0	16
169	0	-3	0	0	0	0	-10	0
170	0	-8	2	-8	0	0	-9	0
171	-5	-5	-1	-5	4	3	-13	5
172	-8	-11	0	-12	0	-12	0	0
174	-3	-4	4	-8	4	0	-8	4
176	0	-8	0	0	0	-8	-8	21
177	0	-33	0	-33	0	-33	-33	0
178	10	-4	12	-2	5	-4	-14	12
179	1	-19	1	-15	1	-8	-19	1
180	7	-6	7	-6	5	-6	-6	9
181	9	-14	11	-5	0	-11	-14	9
183	-17	-17	0	-29	0	-17	-25	0
184	-6	-6	11	-6	0	-6	-11	11
185	-2	0	1	0	-2	0	-2	25
186	4	-12	12	-12	8	-6	-12	18
187	4	-11	4	2	0	2	-4	2
188	49	52	52	-33	-25	52	118	52
192	-4	-4	0	-9	0	-3	-9	9
194	-3	-3	-3	-37	1	0	-38	-38
195	0	0	0	0	0	0	-5	3
196	0	-5	0	-8	0	0	-5	5
197	8	8	0	8	0	8	8	-166
200	-8	-25	-34	-34	-2	-23	-31	-8
201	0	-2	0	0	0	-8	-10	0
202	0	-6	0	-5	0	-3	-10	2
203	10	-6	2	2	2	6	-6	20
204	0	-24	0	-23	0	0	-24	0
205	-2	0	0	-2	-2	0	-2	0
207	-23	-32	0	-23	0	-32	-32	-23
209	1	1	-7	-7	-80	1	1	-237
210	0	-3	0	0	0	-1	-10	0
212	4	0	12	0	6	0	-1	5
215	5	-11	5	-11	-4	0	-11	5
216	8	-12	9	-12	8	-12	-16	8
217	0	-5	0	-5	5	-5	-5	18
218	0	0	3	0	0	0	0	3
221	0	0	0	0	0	0	-6	25
224	1	-27	0	-27	0	-27	-27	6
225	-28	0	-22	-28	-5	0	-34	0
226	0	-29	0	-25	0	-18	-25	0
227	0	0	0	0	3	0	-4	3
228	-68	-70	-70	-83	39	51	-92	-68
230	3	-6	-3	-6	10	-6	-15	21
231	0	0	4	0	4	0	-8	13
232	0	-3	10	-3	0	-3	-3	10
235	0	-10	3	-10	0	-8	-11	0
236	10	-12	13	-16	0	-7	-16	10
237	0	-6	0	-5	0	0	-3	0
238	1	0	11	0	0	0	-5	24
241	0	-5	0	0	0	0	-5	0
242	12	-2	12	-2	0	-2	-8	21
243	12	0	12	0	0	0	-4	15
245	0	-11	5	-11	19	-9	-11	26
246	0	-3	0	0	0	-3	-6	18
247	-3	0	7	0	7	0	-9	19
249	6	-13	5	-11	-1	-10	-13	5
251	0	0	0	0	0	0	-11	0
252	0	0	6	0	0	0	-33	8
253	0	-20	0	-22	-2	0	-20	0
255	4	-5	4	-5	0	-5	-5	24
257	0	-15	0	-15	0	-15	-15	0
258	-4	-3	6	0	5	0	-16	6
259	0	-8	0	-8	3	-8	-16	3
261	0	-4	0	0	0	0	-8	0
263	-219	-3	3	-3	3	-3	-19	-3
265	2	-3	3	-3	3	-3	-3	3
266	0	-8	0	-3	0	0	-44	5
267	-7	-8	17	7	17	-10	10	-7
269	0	-9	3	-9	0	-9	-9	9
270	0	-12	0	-1	4	0	-18	9
272	0	-5	3	-5	0	-5	-5	3
273	5	0	0	0	0	0	-4	5
274	0	0	0	0	0	0	-8	2
275	6	0	7	0	6	0	0	6
276	0	-10	0	-8	0	-8	-21	15
277	-2	-23	-2	-23	7	-6	-23	19
278	0	-5	2	-5	0	0	-6	2
279	-5	-9	1	-9	1	-9	-9	1
281	0	-16	3	-6	4	-2	-24	4
282	5	0	5	0	5	3	0	10
284	0	0	0	0	0	0	-5	0
285	0	-8	0	0	0	0	-25	0
286	0	0	0	-10	6	0	-2	22
288	8	-5	14	-2	1	-24	-12	25
290	0	-32	0	-27	0	-67	-33	0
291	-3	-3	0	-3	0	-3	-10	-2
293	2	-8	2	-3	2	-6	-8	10
294	0	-8	0	-8	0	0	-8	0
295	2	-2	2	-2	0	0	-3	5
296	0	7	5	40	0	0	40	1
298	-4	-6	6	-4	5	-6	-10	9
299	4	-19	-22	-31	6	-2	-27	6
301	9	-3	0	0	0	0	-9	9
302	6	0	6	0	6	6	-3	6
303	0	0	0	0	0	0	0	0
304	0	0	0	0	0	0	0	0
305	4	-6	4	0	4	0	-5	4
307	0	0	0	0	0	0	0	18
308	0	0	0	0	0	0	-13	0
310	0	0	0	0	1	0	0	22
311	0	-4	0	0	0	0	-12	0
312	-12	-7	3	-2	3	-12	-15	3
314	8	-1	8	-1	2	-1	-1	8
315	0	-1	0	-1	9	0	-1	9
316	9	0	9	2	9	0	0	9
317	0	-12	0	-5	0	-1	-12	0
318	-5	-12	0	-10	0	-5	-12	0
319	-13	-43	0	-43	3	-51	-59	12
320	4	-18	5	-21	0	4	-28	9
321	1	-9	7	-8	0	-5	-35	1
322	5	0	5	0	5	0	0	5
323	0	-9	0	0	0	0	-9	0
324	0	-9	0	-3	0	-9	-9	0
329	6	-31	6	-17	6	-2	-32	10
330	0	-9	0	-9	0	-9	-9	15
331	0	-3	0	-3	0	-3	-3	0
332	0	0	0	0	0	0	0	0
333	2	-1	2	-1	7	2	-1	7
334	9	-2	9	0	9	1	-8	9
335	17	0	23	0	0	0	-8	28
336	4	-4	4	-4	4	-4	-16	8
337	0	-9	1	-9	1	-9	-9	4
338	0	-5	0	-5	0	-5	-7	0
339	0	-8	1	-8	5	-8	-13	5
340	0	0	0	0	0	0	-3	5
341	0	-4	3	-1	0	0	-4	10
342	0	-1	0	-1	0	0	0	2
343	0	0	0	-5	0	0	-5	9
344	0	-11	0	0	0	0	-10	8
345	0	-5	0	0	0	0	-10	16
346	0	0	1	0	8	0	0	13
347	15	-1	17	-1	9	-1	-1	16
348	0	-2	0	0	0	0	-8	10
351	-6	-11	0	-8	0	-8	-11	6
354	2	-2	4	-2	3	-2	-4	5
355	0	-8	7	-8	7	-8	-16	7
356	0	0	1	0	0	0	-1	0
357	7	-5	7	-5	7	0	-5	11
358	0	0	0	0	0	0	-4	-12
359	38	-13	38	-8	0	-4	-6	9
360	0	-11	0	-11	0	0	-11	2
361	3	0	0	-17	7	-11	-21	1
363	0	-5	0	-4	0	0	-7	7
364	0	0	7	0	11	0	0	12
366	-6	2	-6	2	-5	-7	-6	2
367	-74	2	22	-32	21	18	17	23
368	25	1	26	-42	-8	27	-27	13
369	0	-5	0	-5	0	-5	-5	7
370	0	-4	0	-4	0	-4	-6	0
372	1	-10	-3	-10	-5	-7	-10	1
373	3	-7	-7	-7	0	-7	-7	3
374	13	-10	-3	3	1	-8	-13	2
375	4	-16	-7	-8	-8	-8	-16	4
377	0	-1	0	-1	0	-1	-1	6
378	0	-2	0	-2	0	-2	-5	12
379	0	0	0	0	0	0	0	11
380	0	-12	0	0	0	0	-12	0
381	0	-4	0	0	0	0	-4	0
382	0	-3	3	-3	3	0	-3	6
383	-2	2	-1	-3	2	-3	-2	8
384	6	0	0	0	6	0	-2	0
386	8	-20	9	-25	5	9	4	-10
387	0	-3	0	0	0	-3	-3	0
389	0	0	6	0	9	0	-10	13
390	1	0	0	0	3	0	0	16
391	0	-14	8	-2	1	-4	-3	8
393	0	-7	3	0	0	0	-10	3
394	6	0	24	0	10	0	-10	70
395	4	-9	4	-9	0	-9	-9	4
397	6	0	6	0	0	0	-8	0
398	0	-8	0	-4	0	-4	-8	6
399	4	-4	4	-4	3	-4	-4	5
400	-3	-3	1	-3	6	-3	-6	6
401	0	-20	0	-12	0	-5	-27	11
402	4	0	4	0	0	0	0	1
403	7	0	10	0	7	0	0	14
404	0	0	9	0	0	0	0	1
405	0	-3	3	-3	0	0	-3	0
406	6	0	6	0	6	0	-4	7
407	0	-3	0	0	5	0	-11	22
408	2	-1	2	-1	2	2	-6	2
409	0	-8	0	-8	0	0	-8	11
410	10	0	2	7	2	0	0	21
411	0	-13	0	-5	0	-5	-13	8
412	-5	-6	0	-5	4	-6	-6	-5
413	-2	-1	1	0	7	-2	-2	20
414	0	-5	9	-1	0	-1	-5	9
415	5	-12	5	-12	0	0	-9	26
417	0	-25	10	-16	10	-13	-29	10
418	0	-13	0	-8	0	-4	-11	0
420	0	-3	0	0	0	0	-14	6
421	0	0	0	12	6	12	-4	16
422	2	-6	2	0	2	0	-6	4
423	0	-36	0	-5	0	0	-44	3
424	-4	-8	18	-8	1	-8	-8	18
425	6	0	4	0	0	4	0	0
426	0	-7	2	-7	1	0	-7	2
427	0	0	0	0	0	0	0	0
429	5	-10	-3	-14	5	-3	-17	-5
432	4	-9	4	-13	-9	0	-9	16
433	0	-5	0	-5	0	-5	-8	0
436	0	-10	1	-15	0	0	-31	0
437	0	0	0	0	0	0	-3	6
438	12	-9	15	0	0	9	17	29
439	-6	-7	-6	0	1	-7	-7	21
441	0	-10	3	-10	0	-10	-11	0
442	2	-7	2	-7	2	-6	-9	3
443	0	0	5	0	0	0	0	8
444	0	-6	0	-6	1	0	-6	5
445	0	0	0	0	0	0	-4	79
446	0	0	0	0	0	0	-2	0
447	3	-4	10	-4	3	-4	-4	8
448	1	-1	1	-2	1	0	-17	12
449	4	-6	4	4	4	4	-6	4
450	0	-8	0	-8	0	-8	-8	26
451	6	-5	6	-4	6	-2	-4	8
452	0	-5	0	-5	1	0	-5	10
453	4	-5	4	-5	4	-2	-17	4
454	2	-12	3	-12	3	-9	-15	24
455	0	-9	0	-9	0	-9	-9	0
456	0	0	1	-2	1	0	-7	8
457	0	-5	0	-14	0	0	-12	13
458	0	-4	0	0	0	0	-5	0
459	0	-1	1	-1	5	7	-1	37
460	0	-2	0	-3	0	0	-20	0
461	9	0	9	3	0	9	-15	-10
463	0	-11	0	0	0	0	-19	0
464	4	-10	4	-10	4	0	-10	55
465	0	0	0	0	0	0	-3	0
466	0	-4	0	-4	0	-2	-34	0
467	0	-2	0	-2	0	0	-6	0
469	0	0	0	0	9	0	-11	0
470	0	-2	0	-4	0	0	-11	0
471	2	-4	2	10	2	2	-27	0
472	0	-4	9	0	9	0	0	9
473	1	-7	1	-7	0	-7	-7	0
475	3	0	3	0	0	0	-1	6
476	0	-6	-105	-6	0	0	-6	12
479	0	-7	0	-4	6	-7	-9	10
480	0	-7	0	-4	6	-7	-9	10
481	0	-7	5	-4	8	0	-7	8
482	4	-6	4	-6	0	-6	-10	4
483	-6	-6	-71	5	5	5	-92	-92
485	0	-5	0	0	0	0	-9	12
486	0	-7	0	0	0	0	-7	0
487	0	-10	0	-10	0	0	-20	5
488	2	-6	3	-6	2	-4	-6	3
490	6	-3	3	9	-3	-3	-3	3
491	3	-4	4	-1	0	13	-12	9
492	1	-16	2	-8	2	-8	-16	4
494	0	-11	0	-11	0	-5	-14	0
495	3	-7	4	-4	2	-4	-13	11
496	4	0	4	0	4	0	0	4
497	0	-10	0	0	0	0	-10	22
498	0	0	3	0	3	3	-18	3
499	4	-15	4	-4	4	-7	-15	4
500	1	0	1	0	0	0	0	0
501	0	-6	0	-6	0	-6	-8	0
502	10	0	1	81	0	0	-48	-4
504	0	-3	3	0	1	0	-3	3
505	1	-4	1	-4	0	0	-5	1
506	0	0	0	0	16	0	0	23
507	0	0	0	0	0	6	-3	0
508	0	-6	0	0	0	0	0	4
509	0	-16	16	-16	0	-16	-23	18
510	0	-3	0	-3	0	-2	-3	0
511	0	0	9	0	0	0	0	9
512	1	-1	1	0	1	0	-6	1
514	0	-4	4	-4	0	0	-4	0
515	0	-7	4	0	0	-7	-11	14
516	10	0	5	-10	0	3	-10	-12
517	4	-3	4	0	3	0	0	0
519	0	0	0	0	0	0	0	0
520	0	-6	0	-6	0	0	-6	3
521	0	-19	0	-19	0	-19	-19	0
523	0	0	0	0	9	0	-5	13
524	1	-3	1	-3	1	-3	-4	4
525	4	-5	4	4	4	-4	-5	4
526	0	0	3	0	0	0	0	3
527	16	-20	16	-25	2	-25	-28	16
528	5	-12	5	-20	5	-12	-16	5
529	6	-10	10	0	0	0	-10	0
530	0	-9	0	-9	7	-4	-9	19
531	-3	-10	16	-3	13	-3	-13	24
532	2	-13	4	-13	4	-13	-13	7
534	0	0	-4	-4	0	0	-8	0
536	3	-17	3	-14	0	-5	-15	3
537	9	-15	10	-15	4	-10	-11	10
539	0	-3	0	-3	0	-3	-9	0
540	0	-13	0	-2	0	0	-14	0
541	4	-3	12	-6	12	3	-3	20
542	3	-10	3	-12	0	-10	-8	3
543	0	0	0	0	0	0	-2	8
544	0	0	0	-8	0	0	-8	0
545	0	0	0	0	0	0	-5	5
546	5	-4	5	-4	7	-4	-4	8
547	0	-4	0	0	0	0	-4	8
548	0	-8	3	-7	3	-3	-12	3
549	0	-5	4	-6	4	-5	-15	-4
550	2	-10	2	-3	2	-2	-14	7
551	0	0	0	0	0	0	0	0
552	0	0	0	0	0	0	-8	31
553	1	-1	1	-1	1	-1	-2	1
554	0	0	0	0	3	0	0	22
555	0	0	0	0	0	-5	-9	0
556	-9	-14	-9	-14	0	-11	-43	10
557	0	-13	0	0	0	-10	-13	0
558	4	-46	4	-32	9	-46	-46	-6
560	140	-9	4	-2	0	0	-4	4
561	0	-3	43	-3	11	-3	-14	43
563	0	-4	0	0	0	0	-10	21
564	0	-7	0	-7	0	-7	-7	4
565	2	-2	0	-2	0	0	-2	0
566	1	0	3	0	3	0	0	12
567	-6	-10	0	-10	0	-10	-10	-20
570	3	-3	0	-3	1	-3	-3	18
571	0	4	0	2	0	2	13	0
573	1	-9	1	-4	0	-4	-9	9
576	0	-11	4	-3	6	0	-12	19
578	7	-4	1	-1	1	-1	-4	9
579	0	0	0	4	0	0	-15	4
581	6	-20	6	-20	6	-10	-17	10
583	-13	3	0	3	3	-13	-13	12
585	5	-28	0	-13	0	-10	-41	11
588	0	-6	0	-6	0	-6	-8	0
589	0	-9	1	-9	0	0	-9	6
590	4	-10	4	-11	2	0	-11	0
592	0	0	48	0	49	0	0	63
593	9	-8	9	-10	7	-3	-10	9
594	12	0	12	0	7	3	0	12
595	1	-2	1	-4	1	0	-4	6
596	0	-3	-3	-3	-3	0	-3	-3
600	2	-15	3	1	1	0	-12	9
602	39	0	39	-4	0	7	-2	39
603	0	-8	11	-8	11	-8	-8	13
604	2	-2	6	-1	6	-1	-11	6
605	2	-1	-1	2	-1	-1	2	-33
606	3	-42	34	-42	37	-32	-32	-32
609	17	0	18	0	0	0	0	18
612	0	0	0	0	0	0	-3	0
613	9	-7	9	-7	8	-1	-2	9
616	3	-2	12	26	3	-2	-2	21
617	9	-7	7	-7	7	-7	-8	5
618	1	-1	1	-1	1	-1	-6	2
620	0	-12	0	-8	0	-6	-12	0
621	8	-31	5	-29	-16	-25	-31	23
622	0	-14	0	-13	0	-13	-19	34
623	7	-8	9	-5	1	-5	-6	27
624	-2	-7	2	-7	2	-2	-13	40
625	0	-12	0	0	0	-8	-12	0
626	0	0	0	0	0	0	-6	0
627	0	-14	2	-14	-2	-14	-16	2
631	13	13	40	34	5	-87	-16	-14
633	0	0	0	-14	0	0	-9	0
634	2	0	0	0	0	0	-8	0
638	0	0	0	0	0	0	0	3
639	18	-4	18	-4	15	18	-4	43
644	0	-5	0	-5	0	-5	-5	7
645	13	0	0	0	11	0	0	0
647	11	-4	14	-4	11	-4	-4	35
648	-90	-51	9	-87	2	-61	-51	-87
649	0	0	0	-6	4	0	-10	4
650	23	-32	23	-31	5	0	-32	23
651	0	-8	3	-7	1	-7	-15	3
652	0	-19	3	-23	0	-13	-13	3
653	0	-1	0	0	0	0	-12	0
654	1	0	2	0	0	0	0	0
655	13	-1	10	-1	8	0	0	13
656	0	0	0	0	0	0	0	0
657	102	96	-65	96	-6	98	96	-31
658	5	-4	5	12	5	-4	-6	5
660	4	-6	3	-6	0	-6	-13	4
661	-3	-3	-3	0	0	-3	-11	0
662	-1	-21	0	-21	4	-10	-20	7
663	0	-13	-5	-13	0	-8	-13	0
664	-6	-8	0	-8	0	0	-8	3
665	0	-7	0	-7	0	4	-7	7
666	4	0	4	0	4	0	0	4
668	-44	11	-24	22	3	-21	-44	-74
669	-42	-3	14	-36	6	-42	-36	-41
670	3	-4	4	-3	2	-3	-16	6
671	0	-10	0	-10	0	-24	-15	-8
672	0	-3	3	-3	3	-3	-8	3
673	10	0	10	0	0	0	0	10
674	0	-14	0	-3	0	-3	-26	7
676	2	0	2	0	2	0	0	2
678	12	0	12	0	12	0	0	12
679	0	-3	0	0	0	-3	-15	0
680	8	-9	9	-9	9	-5	-9	23
681	0	0	0	0	0	0	-2	0
682	0	0	0	0	0	0	-4	3
686	0	-19	8	-7	8	-2	-19	8
687	1	-6	5	-5	1	-1	-6	1
688	4	-5	8	-5	4	-5	-5	15
689	0	0	0	0	0	0	0	0
690	63	-8	91	-10	21	-10	-1	101
691	0	-4	0	-4	0	-4	-24	0
692	0	-2	0	-2	0	0	-6	6
695	3	-8	3	-3	-2	-3	-8	3
697	0	-6	0	0	0	0	-9	0
698	0	0	0	-3	6	12	-9	41
699	6	-6	6	0	5	0	-13	17
701	9	-3	16	0	7	0	-9	8
702	0	-10	0	-3	0	-3	-10	0
704	0	-3	3	0	3	0	-3	3
705	0	0	0	0	2	0	0	13
706	0	0	0	0	0	0	0	0
708	0	-7	4	0	0	-7	-7	0
710	1	-2	9	-6	0	0	-7	21
711	0	-20	2	-13	0	-20	-20	6
712	0	-2	0	-2	0	0	-8	0
713	0	-3	0	0	0	-3	-3	0
714	-1	-11	1	-11	1	-10	-11	2
715	-5	-5	1	-5	0	-5	-16	6
716	0	-1	0	-1	0	-1	-4	0
717	0	0	0	0	0	0	0	0
718	0	0	6	0	0	0	-10	9
719	0	0	5	0	0	0	-3	62
720	8	-9	8	-9	4	-9	-9	18
722	8	-1	8	0	2	8	-3	8
723	3	-19	3	-17	0	-10	-24	13
724	0	-15	0	-15	0	-10	-15	22
725	-2	-9	10	9	10	-9	-9	14
726	-18	-18	10	-18	10	-18	-18	10
727	0	0	0	0	0	0	0	0
728	0	-5	4	0	0	0	-6	0
730	0	0	0	0	0	0	0	0
731	-1	-28	-9	-13	1	-28	-28	61
732	0	-14	0	0	0	0	0	0
733	0	-9	0	-9	0	-9	-12	4
734	4	-17	7	-11	1	7	-16	39
735	0	-20	0	-20	0	-20	-20	13
736	0	0	0	0	0	0	-12	0
737	0	0	0	0	0	0	0	16
739	0	-16	3	-10	3	-16	-16	3
741	26	-6	38	-11	16	0	-20	58
742	0	0	0	0	0	13	-10	13
743	0	0	0	0	0	0	0	-15
744	4	0	4	0	0	0	0	0
750	37	-4	2	-1	6	13	-11	59
751	0	-7	4	-5	1	-5	-3	9
752	2	-7	5	-4	2	-7	-7	10
753	0	-4	0	-8	-2	-4	-4	2
756	0	0	0	0	0	0	0	0
757	3	0	9	0	0	0	0	2
758	0	-8	0	-7	0	-6	-7	4
759	3	-13	3	-13	3	-13	-13	3
760	0	0	2	0	3	0	0	3
761	4	-1	0	0	0	-7	-11	14
762	0	-22	0	-22	-5	-13	-22	1
764	0	-12	0	-12	0	-7	-12	0
765	74	0	0	8	4	-44	0	95
766	0	0	-7	8	48	-7	48	8
767	9	-6	9	-6	9	-3	-9	9
768	0	0	0	0	0	0	-2	0
769	0	0	2	0	0	0	-17	0
770	2	-14	2	-14	0	-8	-8	2
772	5	-8	5	0	0	-8	-11	0
773	9	-9	13	9	9	-9	-7	-7
774	-9	-13	-2	-6	-6	-13	-6	-6
776	-19	2	-19	0	2	0	-15	2
777	-2	0	-94	0	-15	0	-4	-22
779	0	0	0	0	2	0	-6	-151
780	0	-6	5	-6	5	-6	-6	5
782	0	0	0	0	2	0	-9	14
786	3	-61	11	-65	3	-7	-63	18
787	0	-9	0	-9	0	-9	-37	0
788	0	0	0	0	0	0	0	0
789	0	0	0	0	0	0	-8	0
790	0	0	0	2	5	0	0	7
791	1	-3	1	-5	0	0	-3	6
792	10	-1	11	-1	10	-1	-5	0
794	5	-4	5	-4	1	-8	-8	5
796	0	0	0	0	0	0	-2	0
798	0	-7	1	-7	4	-6	-17	43
799	0	-10	0	-11	0	6	-14	13
800	0	-10	0	0	0	0	-11	20
801	0	-7	0	-7	-6	0	-7	9
802	-1	-1	6	-1	6	-1	-1	24
803	1	0	1	0	1	0	0	1
804	3	-6	4	0	2	2	-6	10
807	6	-15	5	-11	6	-11	-17	6
808	0	-17	0	-17	0	-8	-17	0
809	0	-2	0	0	0	0	-7	1
810	1	-15	0	-14	0	-7	-16	3
811	-13	-13	0	-13	0	-9	-13	10
813	5	-1	5	-1	-1	-1	-14	5
814	6	0	-5	6	6	6	0	6
815	-2	-6	0	0	6	0	-7	11
816	0	-19	0	-19	0	-12	-19	0
817	3	-9	6	0	3	-9	-9	6
818	0	-9	7	-6	0	-4	-10	11
819	0	0	0	0	0	0	0	6
820	0	-9	8	-6	6	-5	-9	12
821	3	0	8	0	8	0	-3	8
822	0	0	0	0	0	0	-9	6
823	-8	-14	0	-8	0	-11	-14	3
824	0	-11	0	-12	0	-7	-11	0
825	0	-10	1	-10	3	-4	-10	9
826	4	-4	0	0	4	0	-4	5
827	0	-3	6	-3	0	-3	-3	6
828	0	-5	0	-5	0	-5	-8	16
829	7	0	23	0	1	0	-9	23
830	1	-7	4	-7	1	-7	-7	8
831	6	-2	5	-2	5	-2	-10	-2
832	2	0	1	0	0	0	-4	6
833	9	-6	15	-2	10	0	-2	22
834	11	-14	11	-4	4	-1	-4	11
836	-6	-8	0	-8	-6	-6	-8	21
838	0	0	4	0	0	4	-8	17
839	15	0	15	0	15	0	-20	37
840	0	-5	9	-2	4	-5	-1	9
841	13	0	1	-1	8	0	0	13
842	0	-23	0	-23	0	-23	-29	0
843	0	-2	0	-2	0	-2	-9	2
844	0	0	0	0	0	0	0	40
845	1	0	1	0	1	0	-3	17
849	8	0	8	-10	6	0	-19	8
850	6	0	6	0	6	0	-4	6
851	14	-2	18	-2	7	-2	-2	40
852	0	-6	2	-2	0	-6	-8	0
853	-7	-8	-21	2	0	-11	0	2
854	0	-5	0	-5	0	-1	-8	0
856	5	-8	5	-6	1	-5	-6	10
857	0	0	4	0	4	0	-18	26
858	2	-10	4	-33	1	-3	-6	8
860	0	0	0	0	0	0	-18	6
861	8	-5	8	0	0	0	-5	2
863	0	0	0	0	0	0	0	4
868	3	-10	3	0	0	0	-10	11
869	0	0	6	0	6	0	0	10
870	11	0	11	0	0	0	0	0
871	8	-6	15	-6	7	-6	-3	15
872	0	0	0	0	0	0	0	0
873	0	-4	0	-4	0	-4	-11	0
874	8	0	5	-4	0	5	-4	8
875	28	-3	17	-3	15	-3	-3	32
877	6	-5	6	-5	1	1	-10	41
878	1	-2	2	-2	2	-2	-4	10
880	11	-11	20	-16	14	-7	-15	21
882	0	-27	0	-19	0	0	-33	0
883	1	-6	1	-8	1	-5	0	4
884	10	-21	14	-19	0	-10	-23	15
886	3	-7	3	-5	0	-6	-8	5
887	0	-22	0	-12	0	-6	-26	5
888	4	-6	4	-6	4	-1	-11	4
889	0	0	0	0	0	0	0	0
890	45	-7	45	-7	45	-5	-7	48
891	9	-11	7	-11	1	-11	-11	17
892	9	-9	9	-5	-5	9	-15	9
893	-1	-1	-1	11	15	-1	-10	15
894	0	-19	0	-9	0	-8	-22	0
895	0	-4	4	-4	4	-4	-4	4
896	14	0	4	0	0	0	-3	14
897	7	-2	7	-16	0	0	-43	0
898	5	-5	8	-5	5	-5	-6	17
899	4	-5	8	-3	4	-1	-12	8
900	0	-6	0	-4	0	-3	-6	2
901	0	-8	0	-8	0	0	-8	0
902	0	-1	0	-6	0	0	-5	8
903	0	-10	0	-12	0	0	-9	11
904	3	-2	3	-2	-2	-2	-2	-2
906	6	0	6	0	0	0	0	10
907	6	6	12	0	0	14	14	56
908	6	-13	2	-10	6	-5	-25	19
909	0	-9	0	-9	0	-2	-9	11
910	-1	-1	4	-1	-1	-1	-3	12
912	0	-8	4	-6	4	-6	-8	4
913	0	0	4	0	0	0	-2	6
915	5	0	5	0	5	-2	-12	16
917	3	-5	3	-5	0	-5	-5	16
918	0	-15	0	-15	0	0	-15	17
920	-8	-12	-3	-15	0	-12	-15	17
921	1	0	0	0	0	0	-9	16
922	-4	0	0	0	0	8	-8	-4
924	1	-7	1	-2	1	-2	-30	2
925	-2	-2	8	-2	-1	-2	-2	13
926	4	-6	4	-6	3	-6	-11	16
927	5	-9	-3	-9	0	5	-18	7
928	0	-9	0	-1	0	0	-8	0
930	0	-5	0	-6	0	0	-3	0
932	0	0	0	0	0	38	-6	0
933	0	-8	0	-4	0	-8	-8	6
934	5	0	13	0	5	0	0	13
935	8	0	8	0	0	0	-3	2
936	0	0	0	0	0	0	-4	0
937	2	-4	12	-4	2	2	-7	-118
939	-20	-20	-9	-22	8	0	-45	-20
940	0	-9	0	-6	0	-2	-12	0
941	0	-8	0	-6	0	0	-13	2
942	0	-11	0	0	0	0	-17	0
944	0	-18	0	-5	0	-2	-22	0
945	0	-9	0	-9	0	-9	-9	0
946	0	0	0	0	0	0	-5	4
948	11	-2	11	6	8	-2	-5	11
949	10	0	1	0	10	0	-13	19
950	0	-10	3	-2	0	3	-11	7
951	3	-5	6	0	2	6	-9	10
953	0	0	0	0	5	0	0	5
954	0	-10	0	-5	0	-5	-22	0
955	-6	1	-2	1	0	1	-4	3
957	0	-2	0	-2	0	-2	-13	3
958	-2	0	20	-3	10	14	-3	27
959	0	0	4	0	0	0	-3	0
960	-13	0	-13	0	0	0	-21	0
963	0	-5	6	-5	0	3	-14	11
964	0	-12	0	-12	0	-12	-14	0
968	0	0	0	-3	0	0	-15	0
969	0	0	0	0	0	0	-11	0
970	0	-37	0	-25	0	0	-25	0
971	9	-5	0	-5	9	-5	-10	0
973	0	0	0	0	0	37	0	0
976	0	-6	0	-6	0	-3	-11	0
977	0	0	0	0	0	0	-5	-110
978	0	0	0	0	0	0	0	3
982	9	0	9	9	9	0	0	9
983	-2	-20	-4	-10	7	20	-20	-2
984	0	-12	0	-8	0	-7	-12	0
985	-4	-17	4	-17	4	-12	-12	-4
987	0	-2	0	0	0	0	-12	0
990	11	-7	11	-16	11	0	-25	14
992	4	0	4	0	0	0	-7	15
993	6	0	6	0	0	0	-7	2
994	0	0	0	0	0	0	-8	0
995	-3	-6	0	-5	0	-3	-6	-3
996	0	-1	0	0	0	0	-1	0
997	0	0	0	0	3	0	0	3
998	10	-5	-2	-5	10	-2	-15	10
999	13	-54	13	-54	10	-54	2	11
1000	0	-15	0	-15	0	-7	-15	1
1001	0	0	0	0	0	0	-8	0
1002	9	4	118	-3	-3	-8	6	-3
1004	0	0	9	0	8	0	-2	6
1008	1	-3	0	-3	0	0	-3	14
1009	20	-13	31	-14	22	-9	-19	31
1010	0	0	0	0	0	0	0	10
1011	0	-6	2	-6	2	-6	-6	2
1012	19	0	21	0	0	0	0	25
1013	6	-5	6	-3	6	-3	-5	8
1014	0	-7	0	-10	0	0	-11	0
1015	-29	-13	-29	-2	7	-31	-7	-29
1016	7	0	7	0	7	0	0	7
1018	0	-8	0	-8	0	-8	-8	10
1019	0	-17	0	-14	0	-14	-32	8
1020	5	-9	5	-6	5	-6	-28	5
1021	7	-5	7	-18	7	-5	0	10
1022	20	13	13	20	-3	20	-5	13
1023	1	-10	4	0	6	-5	-10	6
1025	12	-8	-1	0	2	-8	-13	22
1026	0	-6	0	-6	0	0	-7	0
1027	0	-12	0	-15	0	0	-12	10
1028	7	-7	8	-7	7	-1	-7	11
1029	0	0	-27	-84	-58	0	0	4
1030	4	-5	4	-5	4	-5	-14	0
1032	0	0	0	0	0	0	0	0
1033	0	-9	0	-9	0	-1	-15	0
1034	-1	-3	1	-3	1	0	-3	1
1036	10	-9	10	-11	6	-2	-2	42
1037	0	-15	0	-15	0	-8	-15	0
1038	1	-7	1	-4	1	-5	-9	1
1039	0	-2	0	-2	0	0	-2	0
1041	2	-2	2	-2	2	0	-6	6
1042	0	-2	0	0	0	0	-7	1
1044	0	0	-8	0	0	-9	-9	0
1045	0	0	4	0	4	0	0	4
1047	11	-3	0	-12	11	11	-3	11
1048	0	-10	0	-9	0	-6	-13	1
1049	0	-15	8	-25	0	-10	-10	0
1050	0	-22	0	0	0	-16	-24	4
1051	12	-5	5	14	4	5	-22	-5
1052	5	-3	5	-6	5	0	-9	5
1055	0	0	0	0	0	0	0	34
1056	5	0	5	0	5	0	0	5
1057	5	-10	7	0	1	0	-12	7
1059	5	0	16	0	0	0	0	20
1060	0	-6	0	-6	0	-5	-6	9
1061	0	-5	0	0	0	0	-5	3
1062	0	-9	3	-6	0	-6	-9	3
1063	9	0	11	0	6	0	-9	14
1065	0	-7	0	0	0	-4	-11	3
1066	0	-5	7	0	0	0	-5	7
1067	5	-1	11	-1	0	0	-1	11
1068	0	-8	0	-3	0	0	-23	4
1070	1	-3	1	0	1	-3	-5	1
1071	9	-10	9	-2	9	-8	-9	9
1072	0	0	0	0	0	12	-5	5
1073	0	-26	0	-26	0	-10	-26	0
1074	0	-5	0	0	0	-5	-5	0
1076	86	-17	23	-1	9	-17	-17	88
1077	-1	-12	0	-3	0	-3	-10	0
1078	1	-5	1	-1	1	0	-15	1
1080	2	-61	2	-65	0	-51	-61	4
1081	2	-8	2	-8	2	0	-8	2
1082	0	-3	3	0	0	0	-8	0
1087	31	15	29	22	15	15	-14	29
1088	7	1	11	7	-3	8	-1	4
1089	7	-5	7	0	7	0	-2	9
1091	0	-9	1	-9	1	-9	-9	0
1092	0	-3	-6	-9	0	0	-21	0
1093	0	-6	0	-6	0	-6	-6	0
1094	0	-9	0	-1	0	0	-9	0
1095	3	-18	6	-8	0	-8	-23	6
1096	5	-2	5	-1	2	0	-14	39
1098	0	-8	0	-8	0	-3	-8	0
1101	-12	-3	-16	0	0	-1	-3	8
1104	-15	-15	-15	-8	-6	0	-15	-52
1106	0	1	1	1	1	1	1	2
1107	0	-28	15	-16	0	-16	-34	18
1110	5	-10	4	-9	7	-7	-9	16
1113	8	-2	5	-2	0	0	-4	19
1114	0	-6	0	-6	0	-3	-8	3
1115	14	-11	16	-8	16	-8	-14	25
1116	0	-3	4	-1	4	-3	-7	4
1117	0	-1	9	0	0	0	0	0
1118	5	-6	5	-5	5	-4	-6	5
1119	4	-6	4	-7	0	4	-7	18
1121	-11	0	0	0	0	0	-15	11
1122	5	0	0	0	5	0	-21	14
1123	0	-3	0	0	0	0	-8	0
1124	4	-11	4	-11	0	-8	-8	10
1126	4	-5	6	-3	6	-1	-14	8
1127	0	0	0	0	0	0	0	39
1129	1	-5	1	-5	1	-3	-10	1
1130	0	-14	0	-9	0	-8	-14	2
1131	-3	-16	6	-1	6	-16	-16	55
1132	0	-13	0	-13	0	-13	-17	4
1133	0	-4	0	0	0	0	-8	0
1134	3	-3	5	-22	3	4	-17	22
1136	0	0	0	0	0	0	0	0
1137	0	0	6	0	0	0	-10	55
1138	0	0	0	0	0	0	0	8
1139	0	-9	12	-9	15	0	-9	21
1140	0	0	0	0	0	0	-8	4
1141	5	-3	12	-3	5	1	-6	19
1142	8	0	21	0	8	0	0	64
1143	7	-8	7	-8	7	0	-8	7
1145	2	-10	2	-10	2	-6	-32	2
1146	0	-9	0	-9	0	-3	-9	4
1148	0	0	0	0	-5	0	-2	-5
1149	6	0	6	-14	6	6	-5	8
1150	0	-57	-57	1	1	1	-57	-57
1151	4	-7	4	-7	1	-7	-7	4
1152	14	-2	18	-4	14	0	-5	2
1153	9	-9	9	-9	0	-4	-9	18
1154	13	-9	49	-9	5	-7	-33	49
1156	5	-13	13	-8	6	-13	-18	13
1157	24	-9	24	-9	22	-3	-12	24
1158	0	-2	0	-2	0	-2	-2	-2
1159	0	0	0	0	0	0	0	0
1161	0	-8	0	-8	0	-8	-8	2
1162	4	-1	4	-1	0	0	-1	4
1163	-7	-14	-9	-14	-8	-9	-18	3
1165	8	-10	8	-10	8	-4	-15	17
1166	0	0	0	0	0	0	0	0
1167	4	-12	13	-12	10	-2	-12	13
1168	6	-10	15	-10	9	0	-10	15
1169	0	0	0	0	0	0	0	0
1170	0	-7	0	-1	0	0	-7	0
1172	0	0	6	0	0	0	0	6
1174	7	0	7	7	-3	7	0	18
1175	0	-5	7	0	5	0	-5	16
1176	6	-4	6	0	4	0	-12	14
1177	7	-6	7	-2	7	-2	-8	41
1178	0	-21	7	3	3	-21	-21	-6
1179	-35	-16	-33	-35	0	0	-16	0
1180	2	-2	2	-2	4	-2	2	10
1181	1	0	0	0	0	0	-5	0
1182	0	-12	7	-9	0	-5	-12	15
1183	-1	-5	5	-5	5	-5	-5	25
1184	0	-27	0	-12	0	-18	-12	3
1185	-3	-8	0	-4	0	-4	-10	0
1186	0	0	3	0	3	0	-5	9
1187	0	0	0	0	0	0	-43	0
1188	0	0	0	0	0	0	0	0
1189	-44	0	-6	-25	0	-29	-6	-38
1190	-3	-13	0	-13	-13	-13	-15	-9
1191	0	0	0	0	0	0	0	3
1192	5	-1	5	4	5	0	-1	5
1193	1	-2	1	-1	1	-1	-2	9
1194	0	0	0	0	0	0	0	0
1195	0	-9	0	-9	0	-8	-11	0
1196	0	0	0	0	0	0	-4	0
1197	4	0	1	0	4	0	0	4
1198	-3	-4	0	-4	0	-4	-4	10
1200	30	-7	34	-9	30	-5	-9	34
1201	5	-18	9	-12	0	-18	-18	13
1202	14	-6	14	0	9	9	-6	31
1203	0	-8	4	-8	0	-6	-11	4
1204	0	-17	4	-9	4	-16	-19	4
1205	0	0	0	0	0	0	0	0
1206	1	0	8	0	8	0	0	19
1207	52	-15	32	0	40	54	40	50
1208	0	0	0	0	0	0	0	0
1209	-4	-4	0	-4	0	-4	-4	5
1210	0	-3	0	0	0	0	-10	0
1211	0	5	-5	5	5	9	-7	-15
1213	11	-16	11	-12	0	-9	-24	11
1214	4	-11	19	-11	2	-8	-11	64
1215	0	-10	0	-10	0	0	-17	0
1216	7	-6	10	-6	7	0	-6	10
1217	85	0	0	0	81	75	133	-3
1220	1	-4	3	-4	3	0	-4	16
1222	-2	-2	0	-10	0	-4	-2	0
1223	3	0	9	0	0	0	-6	10
1224	3	0	1	0	0	0	-9	3
1226	0	-13	6	-6	1	-13	-16	6
1227	0	8	0	22	0	8	-23	22
1230	53	-7	42	0	0	0	101	53
1231	0	-6	0	-6	4	-6	-6	9
1232	6	-1	7	0	6	0	-2	7
1233	0	-12	4	-8	0	-5	-12	4
1234	-3	0	5	0	5	0	-7	13
1235	0	0	0	0	0	0	0	8
1236	0	-5	2	0	0	5	-14	5
1237	8	-15	7	-15	5	-5	-15	16
1238	16	-12	16	-10	16	-5	-10	24
1239	0	-8	0	-8	0	-2	-8	2
1240	10	-12	2	-12	0	-12	-10	16
1241	0	-24	4	-8	7	-16	-18	0
1244	-6	-12	-6	-9	0	-11	-12	0
1245	4	-2	2	-2	0	-1	-2	1
1247	-16	-38	14	-37	14	-32	-41	12
1248	0	0	0	0	0	0	-8	0
1249	-5	-8	20	-14	2	-8	-8	0
1250	5	-1	12	-1	5	-1	-2	14
1251	5	-16	7	-16	0	-16	-6	7
1252	5	-2	5	-2	5	-2	-2	9
1253	-2	-2	0	-3	0	-4	-4	0
1254	10	0	26	0	10	0	0	5
1255	0	0	0	0	0	0	-4	0
1256	0	0	0	0	0	0	-4	0
1257	0	0	0	-1	0	0	-3	13
1259	0	-4	9	-4	0	-3	-4	9
1260	7	-12	7	-5	4	7	-13	7
1261	7	-3	4	-4	2	0	-4	8
1262	2	0	0	0	8	0	0	8
1263	8	-18	8	-18	0	-18	-18	35
1264	0	-12	0	-8	0	0	-9	8
1265	0	-3	2	-3	0	-3	-3	2
1266	0	0	0	0	0	0	0	0
1267	0	-2	0	-2	0	0	-6	0
1268	2	-13	2	-9	2	-6	-13	5
1269	4	0	7	0	0	0	-1	18
1270	0	0	0	0	7	0	-3	36
1271	3	0	8	0	3	0	-3	8
1273	3	8	0	-5	3	0	-5	8
1274	0	-18	11	-21	6	-15	-18	11
1276	3	0	8	3	3	0	-4	3
1277	0	-14	0	0	0	-1	-8	0
1278	0	-2	0	0	0	-2	-2	0
1279	0	0	0	0	0	0	0	8
1280	-3	-24	6	-22	0	-20	-70	0
1282	0	-19	0	-22	0	0	-14	12
1283	9	-1	9	-1	0	0	-1	9
1284	51	0	7	0	15	7	0	0
1285	1	-1	1	-1	0	0	-4	12
1286	2	-1	2	-1	2	-1	-9	0
1287	0	0	0	0	0	0	-6	0
1288	2	-7	2	-7	2	-7	-7	3
1289	0	-2	0	0	0	0	-2	18
1290	3	-18	3	-14	0	-14	-17	3
1291	0	-8	0	-8	0	-8	-8	0
1292	-15	-12	34	-12	34	-12	-12	65
1293	-6	0	0	3	0	0	-3	38
1294	0	0	0	0	1	0	-3	8
1295	0	-8	0	-8	0	-8	-8	3
1297	3	-8	5	0	3	-6	-8	14
1298	46	44	52	44	0	52	-9	-9
1300	0	0	0	0	0	0	0	0
1301	26	-4	3	-1	3	-1	-11	30
1302	0	0	0	0	0	0	0	1
1303	0	-9	8	-9	3	-9	-9	36
1304	0	-8	0	-8	0	0	-8	0
1305	0	-6	0	0	0	0	-6	2
1307	0	0	0	0	0	0	0	0
1308	7	0	13	0	3	0	0	19
1309	3	-9	0	-6	0	0	-9	15
1310	0	-1	0	-2	0	-1	-1	9
1311	0	-10	1	-12	0	-10	-10	5
1314	0	0	0	0	0	0	-9	0
1315	0	0	0	0	0	0	-1	15
1316	3	-10	8	-10	3	-10	-26	14
1317	4	-2	4	0	4	-2	0	4
1319	0	-4	0	-4	0	0	-6	0
1321	0	0	0	0	0	0	0	0
1322	0	0	0	0	0	0	0	0
1323	0	-11	4	-10	3	-4	-11	5
1324	0	0	0	0	0	0	-3	8
1325	3	-6	3	-3	3	3	-6	9
1326	0	-3	0	-3	0	0	-10	18
1329	-21	-21	0	-21	0	-21	-21	0
1330	0	-13	0	-10	0	-6	-13	0
1332	0	-12	2	-12	2	-11	-9	14
1333	4	-2	4	-2	2	-2	-3	4
1335	-27	0	0	-21	-6	-11	-11	-27
1337	0	-40	7	-40	7	-40	-34	7
1339	0	-1	0	-1	0	0	-1	13
1340	4	-3	8	-3	4	0	-9	25
1341	2	0	2	0	2	2	-1	10
1342	0	0	1	0	0	0	-11	9
1343	0	0	0	0	0	0	-4	4
1344	0	0	3	0	0	0	0	0
1345	0	0	0	0	0	0	-3	0
1346	1	-4	5	0	0	0	-7	12
1348	2	-13	2	-4	2	-4	-16	41
1349	8	-4	3	-4	3	-1	-4	8
1351	0	-8	0	-6	0	-5	-7	0
1352	0	-6	0	-5	0	0	-6	5
1353	0	-4	9	0	0	-1	-6	1
1354	3	-7	3	-7	3	0	-16	3
1355	0	0	0	0	10	0	0	14
1356	0	0	0	0	0	0	0	5
1357	0	-1	0	-3	9	-1	-3	9
1358	0	0	0	-4	0	0	0	0
1359	0	0	3	0	0	0	-8	0
1360	0	0	0	0	0	0	-4	0
1361	1	-15	6	-3	4	-19	-15	0
1363	7	-4	14	-4	9	-4	-7	0
1365	4	-8	4	-7	4	-8	-8	5
1366	0	-4	0	-4	0	-4	-10	0
1367	10	0	10	0	10	0	-5	0
1368	-2	-13	12	-16	12	-9	-13	1
1369	0	0	0	0	0	0	0	19
1370	49	39	67	0	2	67	39	0
1372	2	-22	3	-8	2	-6	-12	8
1373	11	-3	23	-3	16	-3	-8	34
1374	0	-17	0	-17	1	-16	-17	8
1375	2	-8	0	-5	0	-5	-27	2
1376	0	-9	0	0	0	-9	-9	0
1379	0	0	3	0	0	0	0	21
1380	3	-2	0	0	0	0	-10	0
1381	7	-1	5	-1	5	-1	-1	7
1382	-2	-8	2	-6	2	-8	-19	2
1384	3	-11	6	-2	3	-11	-11	10
1385	0	-6	0	0	0	0	-40	7
1386	0	-3	4	0	4	-1	-3	4
1387	0	-8	0	-2	0	0	-12	0
1388	0	-8	0	-4	0	-4	-7	0
1389	1	-4	1	-4	0	-4	-4	8
1390	4	-3	6	-3	3	-2	-3	6
1391	-5	-21	-5	-7	1	-6	-21	1
1392	3	-6	3	-6	3	-2	-6	3
1393	6	-11	0	-9	6	-3	-15	6
1394	0	0	0	0	0	0	0	272
1395	5	-1	5	0	0	0	-1	5
1396	0	0	0	0	0	0	-7	3
1397	-4	-10	0	-10	0	-10	-10	0
1398	0	-3	0	-3	4	-3	-14	6
1399	0	-14	0	-4	0	0	-19	10
1401	0	0	0	0	3	0	-6	3
1402	11	-12	11	-16	11	-3	-16	11
1403	41	-6	37	-6	17	-4	-12	0
1404	1	-6	7	-6	1	-5	-6	12
1405	0	-2	1	-2	1	-2	-2	8
1408	3	-7	3	-7	2	-7	-7	3
1409	0	-8	0	-8	0	-5	-8	35
1411	0	-1	0	0	0	0	-8	0
1412	86	-14	122	-14	25	-14	-8	21
1413	15	-5	1	0	1	-5	-5	49
1414	4	0	4	0	4	0	-3	4
1415	0	-1	0	-1	0	0	-4	8
1417	-7	0	-7	0	0	0	-7	0
1418	5	-4	8	-4	8	-4	-6	10
1419	0	-13	0	0	0	-2	-13	5
1420	0	-2	0	8	1	0	9	28
1421	0	-9	1	-2	0	-2	-8	0
1422	-3	-5	3	-5	-3	-5	-5	6
1423	0	0	0	0	1	0	0	11
1426	4	-4	4	-4	3	0	-9	7
1427	4	-5	4	-5	4	4	-5	4
1428	3	-1	5	-1	5	-1	-1	5
1429	1	0	1	0	1	0	0	1
1430	5	0	7	0	5	0	0	9
1431	0	-3	2	-3	9	-3	-3	15
1436	28	-32	-4	22	22	-13	-42	22
1437	0	-3	0	-3	0	-3	-3	0
1440	0	0	0	0	0	0	-1	0
1441	4	-3	6	0	0	0	-6	13
1444	-6	0	29	-2	5	-6	-6	24
1445	9	-1	9	-1	9	-1	-5	0
1446	0	-10	0	-8	0	-10	-26	0
1447	0	-6	0	-2	3	-5	-11	9
1448	0	0	9	0	0	0	-3	10
1449	5	0	5	0	5	0	-3	5
1450	5	-10	5	-10	5	-15	-15	5
1452	0	0	4	0	4	0	0	4
1453	0	-5	3	-5	0	-3	-11	0
1454	0	0	3	0	4	0	0	4
1455	0	-10	1	-10	0	-4	-10	1
1456	4	-34	4	-15	4	-6	-19	4
1457	0	-8	0	-4	0	-4	-8	0
1459	17	6	-6	-15	0	-6	5	27
1460	-32	6	-16	-18	6	-7	6	7
1462	1	-14	0	-8	0	1	-14	1
1463	-6	-6	-3	-6	0	0	-11	0
1464	0	-3	0	0	0	0	-3	0
1465	0	0	0	0	0	0	0	3
1466	0	0	0	0	0	0	0	0
1467	4	-5	4	0	6	-5	-5	28
1468	0	-6	0	-6	0	-4	-6	0
1469	2	-6	5	0	3	-6	-8	17
1471	-7	-2	5	-7	2	12	-11	12
1472	-4	-7	0	-4	0	-7	-7	5
1473	0	-13	0	0	0	0	-13	0
1475	30	0	24	0	16	2	2	2
1476	0	-1	0	-1	0	-1	-5	0
1478	1	-2	0	0	2	0	-6	20
1479	0	0	0	0	0	13	-8	-8
1480	0	-4	0	-4	0	0	-6	0
1481	-3	0	-3	0	-3	6	-3	-3
1482	-3	0	-3	0	-3	6	-3	-3
1484	0	0	0	0	0	0	0	0
1485	18	-27	76	-1	14	-1	0	18
1486	0	-1	0	-1	1	0	-4	0
1487	8	-10	5	-10	3	8	-15	6
1488	-3	0	0	0	19	3	0	19
1489	6	-16	12	-16	0	-12	-14	17
1490	0	0	0	0	0	0	0	6
1492	7	-8	0	-8	0	0	-16	0
1493	4	0	4	0	4	0	0	1
1495	0	-11	0	-11	0	0	-11	0
1496	5	0	5	9	0	0	0	0
1499	13	-6	13	-6	5	-6	-6	8
1502	-146	27	-6	-23	2	-16	-3	29
1503	4	0	4	0	4	0	0	4
1506	0	-4	0	0	0	-2	-10	0
1508	4	0	56	15	15	4	0	-4
1509	-6	0	0	0	0	-3	-19	-9
1510	2	-5	5	0	0	-5	-15	5
1513	1	-17	2	-17	2	-5	-18	5
1515	0	-8	0	0	0	0	-1	0
1516	0	0	0	0	0	0	-5	0
1517	0	0	10	0	5	0	0	10
1518	6	-16	8	-12	4	-16	-24	25
1519	0	-4	0	0	0	-4	-4	0
1520	4	-3	0	4	0	0	-12	18
1521	0	0	0	0	0	0	0	0
1522	13	-17	13	-17	11	11	-25	13
1523	0	-6	0	0	0	0	-6	5
1526	0	-4	0	-4	-4	0	-13	18
1528	0	-1	0	-1	0	-1	-3	1
1530	12	-7	12	-7	0	-4	-16	12
1531	0	0	2	-4	19	0	-9	31
1532	0	0	0	0	7	0	-1	17
1533	0	-28	-2	-6	0	-6	-9	3
1534	0	-8	0	0	0	-8	-8	0
1535	5	-13	5	-13	0	-12	-15	9
1536	0	-3	0	-5	0	0	-5	0
1537	0	-7	3	-7	3	-7	-15	3
1538	0	0	2	0	2	0	0	5
1539	0	-3	0	-3	0	-3	-3	10
1541	5	-3	5	-3	5	-3	-3	5
1542	0	-15	4	-18	0	6	-18	12
1543	0	0	0	0	0	0	-17	0
1544	0	-3	0	-3	0	0	-12	0
1545	0	0	0	0	0	0	0	0
1546	0	0	1	0	0	0	0	0
1547	0	-4	0	-4	0	0	-3	7
1548	3	-11	3	-11	3	-11	-19	3
1549	0	-15	-6	-15	7	0	-15	10
1550	10	-23	17	-23	10	-4	-18	20
1551	0	-4	0	-1	0	-1	-8	0
1552	0	-15	0	0	0	0	-3	10
1553	0	0	0	0	0	0	-7	0
1554	4	-5	4	0	3	0	-14	4
1556	-5	-60	0	-5	-4	-72	-93	-4
1557	0	-6	2	-6	0	-3	-9	9
1558	7	0	7	0	7	0	0	11
1559	4	-1	4	-1	4	-1	-5	4
1561	0	-13	0	-10	0	-11	-13	6
1562	0	-6	5	-6	0	-6	-6	-6
1564	6	-20	6	0	6	-11	-71	-71
1566	2	0	2	0	0	0	-8	2
1567	-4	0	0	0	0	0	-4	12
1568	0	-7	4	-7	3	-4	-27	4
1569	4	-3	0	-3	7	0	-3	13
1571	8	0	8	0	4	0	0	8
1572	6	0	-51	-37	6	16	6	6
1574	0	97	0	99	5	86	-11	-1
1575	7	-16	7	-12	7	-12	-27	7
1578	0	-9	0	-3	0	-5	-9	0
1579	4	0	12	0	0	1	0	16
1580	0	0	0	0	0	0	-4	0
1581	0	0	0	0	0	0	0	0
1582	0	0	5	0	6	0	-1	0
1583	-7	-6	-2	-6	0	-6	-7	6
1584	5	-5	5	-5	5	-5	-13	8
1585	0	0	0	0	0	9	0	0
1586	0	-6	9	-3	9	-1	-6	9
1587	15	-7	29	-7	19	-7	-7	32
1588	0	-5	0	0	0	0	0	0
1589	0	-7	0	-6	0	-5	-5	0
1590	0	0	0	0	1	0	0	10
1591	0	-4	7	-7	0	-4	-9	7
1592	0	-2	9	-1	7	-1	-2	2
1593	0	0	0	0	0	0	-3	0
1594	0	0	1	0	1	0	-1	-203
1595	0	-3	0	-9	0	-8	-14	0
1596	0	0	0	0	0	0	-15	10
1598	0	-9	3	-9	2	-4	-9	31
1599	0	-10	0	-4	0	0	-4	0
1600	0	0	0	0	0	0	0	0
1601	10	-4	14	-4	10	-4	-4	14
1603	3	-11	3	-11	0	-11	-11	3
1605	9	-35	0	-9	0	-15	-35	-15
1606	3	0	0	0	0	0	-17	9
1610	13	0	13	0	9	0	-1	21
1614	5	-4	0	-4	0	-2	-4	5
1615	35	-9	35	31	18	-9	-15	35
1616	0	0	0	0	0	0	0	0
1617	0	2	2	2	0	-6	2	5
1619	0	0	0	0	0	12	-10	2
1621	0	0	0	0	0	4	-5	4
1623	8	-6	0	0	3	0	-10	8
1625	4	-18	9	0	5	4	-57	10
1626	-9	-12	5	-15	5	-15	-15	9
1627	1	-1	1	-6	1	-1	-13	1
1628	2	-9	4	-9	2	-9	-18	4
1630	5	0	5	0	0	0	-1	0
1631	0	-8	4	-6	1	-6	-10	4
1632	0	0	0	0	0	0	0	0
1634	1	-9	2	-9	1	-9	-9	1
1635	0	-16	1	-7	0	0	-7	7
1636	0	-11	0	0	0	-11	-11	0
1637	0	0	0	0	0	0	-19	12
1638	0	-5	6	-5	0	-5	-16	13
1639	-77	0	-77	0	0	2	-6	-77
1640	1	0	1	0	1	1	-82	0
1642	0	-10	0	-4	6	-4	-17	6
1643	-6	-3	0	15	17	-18	-6	-3
1647	14	-30	15	-8	5	0	-13	15
1649	0	-4	2	-4	0	-2	-7	7
1650	0	-10	2	-6	0	0	-11	2
1651	0	-15	0	-15	0	-15	-15	0
1653	0	-9	0	-9	0	-5	-13	0
1654	0	-3	0	-3	0	-3	-3	-3
1655	0	-3	0	-2	0	-3	-8	5
1656	5	0	0	0	0	0	0	28
1657	-7	-11	-5	-5	2	-7	-11	10
1658	-7	-25	0	-25	0	-25	-50	-115
1662	0	-10	0	-10	0	-1	-12	14
1664	0	-1	0	-1	0	0	-5	8
1665	-3	0	0	-3	0	-3	-2	-3
1666	1	0	15	0	0	1	-2	26
1667	0	0	0	0	0	0	-1	0
1668	0	-1	9	-1	9	0	0	21
1669	4	-3	9	-3	9	-3	-3	50
1670	0	0	3	0	3	0	0	3
1671	0	0	2	-2	0	0	-4	0
1672	-4	-4	0	-4	0	-4	-9	16
1674	0	-5	36	-5	27	0	-9	36
1675	0	0	0	0	0	0	-2	0
1676	3	-3	5	-3	3	-3	-6	5
1677	0	-10	1	-9	0	-4	-12	2
1678	0	-12	0	-9	0	-10	-17	0
1679	0	0	0	0	5	0	0	13
1680	4	-5	4	-5	0	-5	-5	4
1681	0	0	1	0	0	0	0	0
1682	3	-11	12	-11	3	-11	-16	3
1684	0	0	0	0	0	-3	-7	0
1685	9	-21	18	-34	3	-6	-6	9
1686	2	-2	1	-5	2	0	-8	6
1687	-4	-4	0	-4	-4	-4	-4	0
1688	0	-10	0	0	0	-4	-10	0
1689	0	-7	0	-7	2	-3	-10	7
1690	-42	106	-42	106	0	8	106	8
1691	0	-9	0	-6	0	-5	-10	0
1692	2	0	2	1	0	0	0	1
1694	0	-8	0	0	0	0	-15	0
1695	1	-2	1	-1	1	-1	-2	0
1696	4	0	0	0	0	0	0	34
1697	0	-4	0	0	0	-4	-14	0
1699	0	-6	0	-1	0	-1	-15	1
1701	0	-8	3	-8	0	-8	-11	3
1702	0	0	0	0	0	0	-18	0
1703	11	-15	27	42	10	-9	-9	0
1705	-4	-4	1	1	1	-4	-4	1
1706	1	0	1	0	0	0	0	0
1707	0	0	0	0	0	0	-6	0
1708	3	0	0	0	3	0	0	0
1709	4	-7	4	0	0	4	-7	9
1710	1	0	29	0	0	0	0	11
1711	0	0	0	0	0	0	-4	0
1712	26	-57	17	0	0	-57	-57	-46
1713	0	0	2	-2	0	2	-12	6
1714	0	-8	2	-2	0	0	-8	8
1715	4	-5	4	-5	4	4	-5	4
1717	0	-12	9	0	9	-11	-12	9
1718	1	0	5	0	1	0	0	5
1719	0	0	0	0	0	0	-8	0
1721	6	0	0	6	0	10	0	10
1722	0	-5	3	-5	3	-5	-5	8
1723	0	0	0	0	0	0	-30	0
1726	0	-1	0	-1	0	0	-5	8
1729	0	-9	0	-8	0	0	-19	0
1730	10	0	16	0	4	5	0	18
1731	8	-85	-8	-94	13	8	3	8
1732	0	0	0	0	0	0	-9	0
1733	0	-14	0	-2	0	-8	-14	2
1734	0	-26	0	-26	0	-26	-26	0
1736	0	0	0	0	0	0	-14	8
1738	0	-6	0	-2	0	0	-6	2
1739	0	0	0	0	0	0	0	0
1740	0	-5	5	-2	5	-5	-10	8
1741	0	0	0	0	0	0	0	0
1742	0	0	0	0	0	0	-9	0
1743	8	0	0	0	0	0	0	17
1744	2	-13	2	0	2	-6	-26	10
1745	0	-15	0	-10	0	-15	-15	0
1747	-5	-18	0	-18	3	-14	-20	4
1748	1	-8	7	-7	4	-1	-11	28
1752	0	-8	-3	-8	0	-3	-11	4
1753	0	0	0	0	0	0	0	0
1754	5	-11	3	-7	5	0	-11	5
1756	23	-5	13	-5	13	1	-9	31
1758	3	0	3	0	3	0	0	3
1759	18	-1	18	-1	-1	-1	-8	20
1760	29	-21	29	-21	27	-21	-21	62
1762	0	-3	0	-3	0	-3	-3	10
1763	1	-10	1	-7	0	-1	-11	0
1764	6	0	6	0	4	0	0	9
1766	0	0	0	0	0	0	-3	9
1767	0	-5	0	-5	0	-5	-7	1
1768	0	0	2	0	0	0	-11	7
1769	0	0	0	0	0	0	-15	8
1770	0	-8	0	-8	0	-8	-10	0
1771	-1	-3	1	-3	9	-3	-3	9
1774	5	-6	5	-2	1	-2	-35	46
1775	0	-2	0	-1	0	-4	-18	0
1776	0	-5	3	-5	0	0	-15	6
1777	2	0	4	0	2	0	-1	0
1778	3	-9	0	-2	3	-9	-38	-2
1779	0	-8	0	0	0	-7	-10	3
1780	-16	-14	-3	0	0	-16	-16	9
1781	0	-3	0	-3	0	-3	-3	5
1782	0	-3	0	0	0	0	-3	0
1783	-1	-2	10	-4	10	-1	-1	10
1784	2	0	2	0	0	0	-2	2
1785	6	-11	8	-3	6	-6	-17	10
1786	5	-1	5	5	5	-1	-2	5
1787	0	-25	0	-25	0	-9	-34	0
1788	0	0	0	0	0	0	-9	0
1789	1	0	0	0	0	0	-10	0
1791	5	-18	16	-18	0	-18	-18	16
1793	0	0	0	0	0	0	-1	5
1794	4	-11	0	-11	2	8	-18	12
1795	0	-6	0	-1	0	-1	-3	0
1796	2	-2	2	2	2	-2	-2	6
1797	5	-6	1	-6	0	-6	-6	20
1799	-11	-15	0	-11	0	-11	-11	-20
1800	-3	-7	6	-3	0	-7	-7	0
1801	6	-5	6	-5	1	-2	-9	10
1802	0	-5	0	-2	0	0	-5	0
1803	1	0	1	0	1	0	-3	1
1804	0	-3	0	-3	0	-3	-3	8
1805	6	-4	7	-4	7	0	-4	10
1806	0	-8	0	-1	0	-1	-8	0
1807	3	-16	3	-15	4	0	-22	8
1809	7	-2	13	-2	2	-2	-8	13
1811	12	0	1	0	13	0	0	13
1812	3	-10	3	-10	0	-10	-14	26
1813	-2	-9	1	-7	1	-7	-11	7
1814	56	0	16	0	25	0	1	90
1815	1	-8	10	-8	1	-8	-8	24
1817	0	-2	-2	-6	1	-2	-23	6
1818	18	0	22	9	-92	0	0	65
1819	0	0	0	0	0	0	0	0
1820	8	-5	0	-1	8	-4	-10	8
1821	1	-1	14	-1	14	-1	-1	14
1822	5	-1	6	-1	6	-1	-1	6
1824	12	202	208	191	-23	95	194	214
1825	-2	-4	1	-4	8	-4	-4	0
1826	0	0	0	0	0	0	0	0
1828	0	4	0	0	0	0	0	-83
1830	0	-9	1	-4	2	-5	-11	11
1831	0	-6	0	0	2	0	-16	2
1833	0	-2	1	-1	0	-1	-1	10
1834	0	-6	0	-5	0	-5	-6	0
1835	0	-2	0	-2	3	0	-2	7
1836	3	0	5	3	3	3	-14	3
1837	17	-6	17	-3	9	-3	-6	18
1838	0	-3	0	-3	0	-3	-6	0
1839	0	-3	0	-3	0	0	-3	23
1840	2	-31	2	-28	2	-15	-31	2
1843	0	-2	0	0	0	-2	-2	0
1844	2	-7	0	-7	0	0	-7	0
1845	0	-5	1	-2	0	-2	-13	7
1846	-3	-10	0	-10	0	-10	-15	1
1847	0	-3	-3	-3	0	0	-3	23
1848	0	-9	0	-4	0	-4	-17	13
1849	6	-4	6	-2	0	-2	-7	26
1850	17	-19	19	-16	14	10	-22	19
1852	0	0	4	0	4	0	-10	4
1853	0	-4	0	0	0	-4	-7	0
1856	0	-6	2	-6	2	0	-6	2
1859	0	-5	0	-5	0	-5	-5	5
1860	-10	-7	2	-2	0	1	-15	0
1861	0	-3	0	0	0	0	-7	1
1862	0	-2	0	-1	-1	-1	-11	0
1863	0	-8	0	-8	0	-8	-8	2
1864	0	0	0	0	8	0	0	18
1865	26	-11	30	-11	2	-9	-11	1
1866	0	0	0	0	0	0	0	0
1867	0	-4	0	-2	0	-2	-9	0
1868	0	-10	0	-10	0	-16	-16	0
1869	2	-1	4	0	0	3	-3	-1
1870	0	-9	0	-9	0	0	-11	3
1871	5	-2	8	-1	0	-1	-2	8
1872	2	1	2	2	0	2	0	1
1873	0	0	0	0	0	0	-3	0
1874	3	-13	14	-7	16	-6	-14	32
1875	0	0	0	-3	0	0	-3	0
1876	-12	-18	12	-18	11	16	-18	26
1877	0	0	0	0	-5	3	-21	3
1880	0	-19	0	0	0	0	-44	0
1881	15	0	0	0	0	0	0	21
1882	3	-3	3	0	3	0	-8	3
1883	0	0	1	0	0	0	-5	3
1884	0	-7	0	-7	0	-5	-7	3
1885	8	-24	8	-24	5	-3	-36	8
1886	0	-14	2	-5	9	-5	-11	20
1889	0	0	0	0	0	0	0	0
1890	8	-8	8	-2	0	0	-11	18
1891	11	-7	28	-5	11	-5	-9	43
1892	0	-10	0	-5	0	0	-10	9
1893	1	-9	1	-9	1	-9	-9	1
1896	3	-8	3	0	1	0	-8	12
1898	8	-31	12	-17	8	-14	-17	12
1899	0	-15	0	-15	0	0	-15	0
1900	0	0	0	0	0	0	0	216
1901	0	-2	0	0	0	0	-4	0
1902	-8	-10	5	-8	0	-10	-8	54
1904	0	0	0	-2	0	0	0	0
1905	0	0	0	0	0	0	-8	12
1906	0	-4	0	-1	5	0	-5	5
1907	10	-1	10	0	6	0	-1	10
1908	10	-5	8	0	6	0	-8	13
1909	0	0	5	0	0	0	-6	9
1910	0	-3	0	0	0	0	-1	0
1918	9	-6	16	9	9	24	-6	23
1919	0	0	4	0	0	0	0	78
1920	0	-2	0	-2	0	0	-2	10
1921	11	0	0	0	11	0	-12	16
1922	-8	-10	0	-8	8	-10	-10	-10
1923	0	-8	0	-4	0	-6	-8	0
1924	0	0	0	0	4	0	-3	10
1925	3	0	0	0	0	0	-13	5
1926	3	87	1	87	0	84	84	3
1927	6	-2	6	-2	2	-1	-2	8
1928	1	-10	22	-10	1	-31	-10	22
1929	0	-8	0	-8	0	-8	-8	0
1930	1	-5	0	-5	1	-5	-15	10
1931	9	-9	9	-9	5	-9	-9	9
1934	9	-13	6	-13	0	-9	-11	19
1935	0	0	2	0	2	0	-20	17
1936	-9	-20	-23	-20	-17	0	-17	14
1937	2	-4	6	-4	0	-3	-3	2
1938	0	0	0	0	0	0	0	12
1939	0	0	0	0	0	0	0	0
1940	7	-1	9	-1	7	0	-2	9
1941	2	-6	2	-6	2	-1	-1	13
1942	2	-6	2	-6	2	-1	-1	13
1943	10	-10	12	-4	0	-5	-10	7
1944	-4	-11	-1	-11	-4	-1	-11	4
1945	3	-21	3	-22	3	-12	-12	3
1946	0	0	0	0	0	0	-5	0
1947	-6	0	-8	-7	0	0	-9	7
1948	1	-19	1	-19	1	-19	-21	9
1949	7	0	10	10	10	10	-21	10
1951	4	-8	15	-8	4	-8	-8	15
1952	0	0	0	0	0	0	0	16
1953	0	-2	0	-2	0	0	-2	0
1954	0	0	0	0	0	0	-13	3
1955	0	-2	1	-2	1	-1	-2	6
1956	0	0	0	0	0	0	0	0
1957	0	-4	0	-4	0	-4	-13	0
1958	2	-8	8	-8	-8	2	-8	0
1959	0	0	0	0	0	0	0	14
1960	-4	12	9	15	9	10	-12	-30
1961	-9	3	6	6	3	3	-9	-39
1964	0	-6	0	-6	0	-6	-15	0
1966	0	0	3	0	3	0	-10	-7
1967	0	-3	0	-3	0	-3	-10	0
1968	26	-1	35	23	23	26	-1	41
1969	1	-14	3	-11	0	-8	-11	8
1970	0	12	14	14	0	-11	-17	14
1971	0	-8	0	-8	0	0	-8	0
1972	0	-4	0	-4	0	-4	-4	4
1973	-2	-2	3	-2	3	-2	-2	39
1974	0	0	0	0	0	0	-5	0
1975	0	-4	0	-6	0	0	-9	0
1976	-4	0	-13	0	0	0	0	-66
1978	6	0	6	0	6	0	0	6
1979	10	-3	10	0	7	0	-10	10
1980	0	0	0	0	0	0	-7	0
1982	0	-10	0	-3	0	0	-11	0
1983	18	-8	21	-7	12	-7	-8	21
1984	0	0	0	0	0	0	0	0
1985	4	-11	4	-11	4	-2	-11	6
1986	2	-11	2	-8	2	-8	-11	11
1987	-6	-7	0	-7	1	0	-6	12
1988	0	-9	0	-9	0	-8	-9	0
1989	0	-14	10	-17	5	-5	-19	26
1991	0	0	0	0	0	0	-11	0
1992	0	0	0	0	2	0	-7	0
1993	0	-3	0	-3	0	-3	-3	0
1994	0	0	0	0	0	-17	-20	-17
1996	0	-8	3	-9	3	0	-9	3
1997	9	-2	9	-2	0	-1	0	23
1998	0	0	0	0	0	0	-44	0
1999	0	-2	0	0	0	-2	-2	0
2000	-18	-11	0	-11	0	-11	-7	0
2001	0	0	3	0	2	0	0	0
2003	0	-15	0	-10	0	-10	-27	0
2004	0	-12	0	-9	0	-12	-12	0
2005	0	0	0	0	0	0	0	0
2006	0	-10	0	-10	0	-10	-10	0
2007	10	-2	3	-2	3	3	-5	23
2008	0	-15	0	-15	-1	-12	-15	0
2009	-4	-4	-4	-4	0	-4	-4	9
2010	4	-17	4	-14	1	-14	-17	12
2012	0	-9	0	-12	0	0	-17	3
2013	-5	-6	-5	-6	3	-5	-16	3
2014	0	-1	1	-1	0	-1	-3	6
2015	0	0	0	0	1	0	0	3
2016	0	0	0	0	0	0	-4	5
2017	0	-3	11	-3	8	0	-3	11
2018	-73	0	-58	7	11	-80	-116	-44
2019	2	-15	-3	-15	2	-11	-15	14
2020	-46	-1	-1	-11	-1	-25	-25	3
2022	1	-5	7	-5	7	0	-5	14
2023	3	0	3	0	8	0	0	11
2024	1	-33	22	-5	6	60	-40	6
2025	2	-31	2	-30	2	-2	-17	10
2027	-6	-6	0	-6	-2	-6	-6	-2
2028	0	-9	0	-9	0	-3	-10	13
2032	0	-2	4	-5	7	-2	-5	24
2033	0	-6	0	-6	0	-6	-6	0
2034	0	0	0	0	0	0	-6	0
2035	-8	-8	-6	-8	0	-8	-13	3
2036	0	-13	0	-13	0	0	-13	0
2037	0	0	0	0	0	0	-8	0
2038	0	0	0	0	0	-9	0	0
2039	0	-9	0	-9	0	-9	-9	15
2040	2	-9	0	0	0	-3	-11	0
2042	0	0	0	0	0	0	0	0
2043	0	-23	0	-30	0	-23	0	0
2044	1	-11	1	-11	1	-8	-11	2
2045	0	-4	0	-4	0	-4	-9	0
2046	7	-9	7	-9	6	-9	-3	7
2047	0	-6	0	-6	0	0	-6	0
2048	0	0	0	0	0	0	0	0
2049	1	-1	1	-2	0	1	-4	3
2051	6	-3	7	-3	7	-3	-3	7
2052	0	0	0	0	1	0	-22	8
2053	0	-18	0	-12	1	-8	-18	6
2054	0	-16	0	-9	6	-7	-16	6
2055	0	-13	0	-13	0	-5	-13	0
2056	13	0	5	0	7	0	-5	18
2057	1	-9	1	-9	1	-7	-15	2
2058	1	-9	1	-9	1	-7	-15	2
2059	0	-2	0	0	0	0	-13	2
2062	0	0	0	0	0	0	-8	2
2064	0	-10	5	-6	0	-6	-16	5
2065	0	0	0	0	0	0	-3	0
2066	0	0	0	0	0	0	-13	0
2067	0	0	0	-7	0	0	-5	10
2070	7	-15	31	-11	8	-11	-23	28
2071	13	-12	3	-10	3	3	-4	22
2072	3	-7	3	0	0	-7	0	0
2074	46	46	-10	46	41	46	-81	-2
2075	0	0	0	0	0	0	0	0
2076	-2	-2	0	-2	0	-2	-12	0
2078	0	0	0	0	0	0	0	0
2079	1	-1	1	-1	1	-1	-1	1
2080	0	0	0	-10	0	0	-2	0
2082	5	-5	5	-5	3	0	-7	5
2083	0	0	-1	-6	0	6	-6	1
2085	24	-11	24	-2	15	-4	-52	24
2086	1	-10	9	-7	0	-8	-9	0
2087	0	-22	0	-9	0	-9	-23	5
2088	0	-15	0	-10	0	-15	-15	8
2090	7	-65	7	-59	7	-65	-66	7
2091	0	-13	1	-13	2	-6	-15	5
2096	0	-6	4	-6	0	-3	-6	0
2097	0	-2	0	-2	0	0	-2	6
2098	11	2	8	2	2	2	-3	19
2099	0	-2	2	-4	2	0	-2	4
2100	0	0	0	0	0	-4	-6	0
2101	0	0	0	0	0	0	-1	0
2102	0	0	3	0	3	0	-1	10
2103	0	-2	4	-1	4	-1	-5	4
2104	3	-4	3	-4	1	0	-4	10
2105	0	0	4	0	0	0	-20	1
2107	0	0	1	0	0	0	0	4
2108	0	-10	0	0	0	0	-10	5
2109	4	0	4	0	0	0	-4	12
2111	0	-9	0	-4	7	0	-8	11
2114	11	-12	11	-12	2	-11	-12	3
2115	0	-4	4	-4	4	-4	-4	9
2116	20	-8	11	4	14	-8	-16	19
2118	0	-5	0	0	0	0	-17	3
2119	0	0	4	0	0	0	-5	4
2120	0	-5	1	0	1	-3	-7	4
2121	0	-1	0	0	0	0	-3	0
2122	2	-10	2	-10	2	-10	-12	0
2123	0	0	0	0	0	0	-5	3
2124	0	-3	0	-3	-3	0	-5	0
2126	7	-2	7	-2	7	-1	-2	7
2127	-14	-2	-1	-2	0	-14	-2	-1
2128	3	-2	4	-4	0	-2	-2	10
2129	-2	-7	0	-2	1	-2	-12	1
2130	11	-7	11	-7	3	-4	-16	19
2131	0	0	0	0	0	0	-11	0
2132	-5	-12	0	-12	3	-12	-12	3
2133	0	0	0	0	0	0	-5	0
2134	0	-24	0	-20	0	-5	-28	0
2135	0	-2	8	-2	8	0	-2	14
2136	4	-10	4	-10	0	0	-14	4
2137	0	0	0	0	0	0	-7	0
2138	6	-7	6	-7	6	-4	-20	6
2139	0	-7	0	0	0	0	-9	6
2140	4	-9	7	-9	5	-9	-9	7
2141	0	0	0	0	0	0	-7	0
2142	0	-2	0	-2	0	-2	-20	32
2143	-2	-10	-2	-6	4	-10	-10	6
2144	2	-10	2	-10	2	-6	-14	13
2145	11	-4	0	0	0	-4	-12	0
2146	0	-6	0	-6	0	-3	-6	8
2147	0	-3	0	-3	0	0	-3	5
2148	0	0	0	0	0	0	-4	0
2150	2	-13	2	-13	0	-8	-13	2
2151	7	-1	4	-1	0	0	-1	15
2152	-1	-3	-3	1	1	-1	-7	3
2153	3	0	3	0	0	0	-3	3
2154	0	-12	0	-10	0	0	-6	0
2155	0	-5	0	-3	0	-3	0	0
2156	0	-3	0	0	0	0	-9	0
2157	9	-26	16	-22	16	-22	-26	52
2158	0	0	0	0	0	9	-12	9
2160	3	-3	3	-2	3	-3	-5	10
2161	0	-3	0	-3	12	0	-9	21
2162	0	0	3	0	0	0	0	60
2164	-8	-8	1	-8	0	-8	-8	10
2165	0	-2	0	0	0	3	-13	11
2166	0	-8	0	-3	3	-13	-13	3
2167	0	0	8	0	8	0	0	8
2168	-7	-7	7	-10	10	-5	-11	10
2169	2	-11	5	0	2	0	-11	5
2170	0	-4	0	-4	0	-2	-6	6
2171	0	-3	0	0	0	0	0	17
2172	7	-9	10	-9	0	-9	-9	20
2173	11	0	14	0	4	0	0	11
2175	2	-11	5	-11	5	-7	-9	5
2176	2	-8	3	-10	3	0	-11	8
2178	16	-4	18	-4	16	0	-4	23
2179	7	-13	7	-3	7	0	-21	22
2180	5	-3	8	-3	3	-3	-3	5
2181	4	0	0	0	2	0	0	15
2182	0	0	0	0	0	0	-1	18
2183	0	-15	2	-11	1	-2	-15	5
2184	3	0	0	0	0	0	0	0
2185	0	-8	7	-3	0	-1	-26	6
2186	4	-6	0	-6	0	-6	-8	0
2189	0	0	3	0	0	0	0	0
2191	-4	-8	0	0	0	0	-10	0
2192	-4	-8	0	0	0	0	-10	0
2193	0	-4	0	-4	0	0	-4	0
2194	5	0	5	0	5	0	0	13
2195	0	-4	5	0	5	0	-6	5
2197	0	0	0	0	0	0	-12	0
2198	0	-5	0	-3	0	-3	-9	0
2200	0	-7	0	-7	0	-7	-7	4
2202	0	-3	1	-2	1	-2	-6	10
2203	12	-4	15	-4	-2	-4	-4	15
2204	0	-6	0	-6	0	-2	-6	0
2205	1	-4	-7	-4	0	0	-14	1
2206	2	-2	4	0	0	2	-4	4
2207	0	0	0	0	0	0	-13	0
2208	-5	-5	0	-10	1	0	-5	4
2209	0	-3	7	-3	6	-3	-19	8
2211	0	0	0	0	0	0	-8	0
2212	0	-3	0	0	0	0	-6	10
2214	1	-18	0	-18	-15	-15	-27	11
2217	0	-7	6	-4	0	0	-15	0
2218	0	-9	0	-9	0	-7	-9	0
2219	0	-9	0	-9	0	-7	-9	0
2220	0	-2	0	-2	0	0	-7	0
2221	0	-3	0	-3	0	-3	-8	0
2222	4	-5	4	-5	0	-3	-8	17
2223	1	-17	6	-8	1	-7	-18	1
2224	0	-2	0	-12	6	0	-15	14
2225	0	0	0	0	0	0	0	1
2226	7	-4	7	0	3	0	-4	7
2227	0	-13	0	-12	0	-8	-13	0
2228	11	-20	16	-26	11	-17	-18	21
2229	0	-6	0	-6	4	-2	-10	4
2230	5	-11	5	-11	3	-10	-11	5
2231	0	-16	0	-16	0	-6	-19	12
2232	0	-5	0	-5	0	-5	-5	9
2233	-11	-6	2	-6	2	0	-11	12
2235	0	-10	0	-10	0	0	-16	0
2236	0	-5	0	-5	0	-3	-5	22
2237	4	-3	6	-3	5	-3	-3	10
2238	7	-5	10	-5	5	-5	-8	10
2239	0	0	0	0	0	0	-46	16
2240	10	-6	10	-2	8	-6	-6	10
2241	0	0	0	0	0	0	0	0
2242	8	-14	17	-14	0	-14	-18	22
2243	0	-10	0	0	0	0	-24	5
2244	19	-10	15	-10	1	-10	-10	24
2245	-3	0	0	-2	0	0	-13	0
2246	-3	0	0	-2	0	0	-13	0
2247	71	28	33	70	-5	96	-5	63
2248	3	-4	6	-8	1	-4	-4	-51
2249	10	6	0	10	0	19	-12	78
2250	16	-2	17	-2	0	25	-6	41
2251	0	-14	0	-14	2	0	-23	12
2252	-2	-14	5	-21	1	0	-26	15
2255	-17	-17	4	-17	-11	-17	-21	-17
2256	0	-6	0	-1	0	-1	-6	9
2257	-55	0	-13	-5	4	-13	0	-55
2260	0	-3	0	-3	0	0	-15	0
2261	-1	0	-11	-13	9	9	-1	9
2262	0	0	0	0	0	0	-2	0
2263	13	-15	16	-15	0	-15	-13	13
2265	0	-12	0	-12	0	-4	-10	3
2266	0	-15	0	-10	0	0	-18	5
2267	-26	-22	10	-14	4	-22	-34	21
2268	0	0	0	0	0	0	0	0
2269	0	0	3	0	0	0	0	0
2271	0	0	4	0	5	0	-3	13
2272	9	-13	9	-13	2	-7	-14	9
2275	0	0	0	0	0	0	0	0
2276	0	-8	1	-7	1	-8	-9	5
2277	4	0	4	0	4	0	0	28
2278	0	0	0	0	0	0	-14	13
2279	0	-5	0	-5	0	-5	-13	0
2280	-3	0	0	0	0	0	0	15
2282	0	-4	0	-4	0	-1	-4	0
2283	3	-9	3	0	0	0	-9	15
2284	0	-4	1	-4	1	-1	-12	7
2285	0	-1	0	-1	0	-1	-4	0
2286	-28	-5	4	-47	4	-11	-9	-47
2287	0	-9	3	0	5	0	-10	-10
2288	2	-9	19	-9	19	-9	-15	23
2289	22	1	3	0	3	63	0	4
2290	5	-1	5	-1	0	0	0	8
2291	-18	-4	-4	-9	-4	-20	-13	-25
2293	1	-4	1	-3	1	-1	-7	2
2294	2	-4	0	-2	1	-2	-4	8
2295	-27	-27	0	-55	-8	0	-55	20
2296	1	0	1	0	1	1	-16	1
2298	0	0	1	0	1	0	-1	11
2299	0	-19	0	-15	0	-9	-19	0
2300	-7	-11	-5	-10	1	-10	-10	5
2301	0	-6	1	-5	3	0	-6	3
2302	0	-5	1	-3	1	0	-3	2
2303	0	-5	0	0	0	-5	-9	11
2304	0	-1	0	-1	0	-1	-1	0
2305	0	-10	7	-10	0	-7	-10	15
2306	0	-10	0	-10	-10	-5	-10	0
2308	0	0	0	0	0	0	0	0
2309	0	-10	0	-5	0	0	-10	1
2310	0	-10	0	-7	0	0	-10	0
2311	4	-3	4	-3	4	-3	-3	12
2312	5	-3	8	0	8	0	0	8
2313	-4	-4	0	-4	5	-4	-5	9
2314	3	-3	0	-2	0	-2	-2	11
2317	0	-5	0	0	0	0	-5	0
2318	-77	-10	-3	-10	0	-10	-10	-83
2320	5	0	8	5	7	8	-4	8
2321	1	0	3	0	3	11	0	0
2323	15	0	3	0	0	0	0	-15
2324	0	0	0	0	0	0	0	0
2325	0	0	0	0	0	0	0	0
2326	0	-1	0	-1	0	-1	-8	1
2327	0	-4	0	-4	0	-4	-4	0
2328	2	-16	9	2	2	2	-24	9
2329	4	-3	7	-3	2	-3	-3	4
2330	0	-6	0	-6	0	-5	-5	10
2331	0	-6	0	-3	0	0	-25	6
2332	0	-6	0	-6	0	-6	-7	0
2333	3	0	9	0	6	0	0	35
2334	7	-4	5	-4	2	7	-4	10
2335	0	-9	0	-9	0	-9	-9	0
2336	10	-3	0	0	-3	-2	-8	10
2338	3	1	7	3	0	3	0	18
2339	3	-7	3	0	3	0	-9	3
2340	0	0	0	0	0	0	-3	6
2342	0	0	0	0	0	0	-29	49
2343	1	-57	4	-71	-55	-71	1	1
2344	-14	-1	11	-19	0	-14	-1	1
2347	0	0	0	0	0	0	0	-322
2349	0	-8	0	-8	0	-8	-13	-3
2350	0	-47	0	-6	-6	-6	-66	-27
2352	0	0	35	0	8	0	0	51
2353	0	-5	0	-3	0	0	-11	0
2354	1	-2	1	-2	0	0	-2	0
2355	8	8	4	4	8	8	-16	33
2356	0	0	0	0	3	0	0	0
2357	0	0	0	0	0	0	0	0
2358	0	-11	0	-9	0	-11	-11	0
2359	0	-4	1	-4	3	-4	-4	10
2361	0	0	0	0	0	0	-9	0
2363	0	-7	2	-7	4	-5	-7	31
2364	8	0	8	0	0	0	-2	8
2365	34	-4	34	34	1	-2	26	6
2366	4	0	4	-3	4	0	-9	4
2367	5	0	3	0	3	0	-7	1
2368	-6	-5	-2	-6	7	-1	-6	30
2369	0	0	0	0	0	0	-10	0
2370	4	-6	4	0	0	-6	-6	4
2372	0	-10	3	-7	0	-7	-10	2
2373	-5	-5	-1	-1	4	-5	-5	4
2374	0	-10	0	0	0	-9	-23	0
2375	-1	-1	6	-1	4	-1	-1	-1
2377	5	-17	5	-17	5	-11	-17	13
2378	-2	-2	-2	-2	16	-2	-2	-2
2379	3	-8	3	-7	3	3	-8	9
2381	-1	-12	0	0	0	-2	-15	0
2382	0	-5	0	-5	-5	-5	-4	0
2384	0	-5	0	-5	0	-5	-19	3
2386	28	0	3	0	0	0	-4	0
2388	3	0	6	0	3	0	0	9
2389	0	0	0	0	0	0	-6	5
2390	3	-8	4	-7	3	0	-11	22
2393	5	-1	5	-1	5	0	-1	5
2394	0	-5	0	-5	0	0	0	29
2395	0	-3	0	-3	0	-3	-7	0
2396	4	-11	4	-5	0	-2	-2	6
2398	0	-7	5	-2	0	-1	-2	8
2399	0	-3	0	-3	0	3	-6	12
2401	0	0	0	0	0	0	-4	0
2402	0	-13	0	-13	0	-13	-21	0
2404	0	0	0	0	0	0	0	11
2405	8	-12	8	-10	8	-9	-14	8
2407	5	-3	5	0	5	5	-22	5
2409	0	-8	0	-8	0	-5	-8	3
2411	2	-1	7	7	1	-7	-10	7
2412	0	-33	0	-33	0	-33	-30	21
2413	0	-9	0	-8	0	0	-9	0
2414	-6	-6	-2	-2	8	-6	-9	14
2416	0	0	3	0	0	0	-26	11
2417	0	-6	0	-6	0	0	-6	4
2418	5	-2	5	5	5	8	-2	8
2419	0	-7	0	-7	3	0	-10	28
2421	0	-4	2	0	0	0	-8	2
2423	0	-8	7	0	2	-8	-8	3
2425	0	0	4	0	0	4	-5	4
2426	0	-9	0	-5	4	-9	-13	0
2427	2	-4	4	-3	2	-2	-4	8
2428	0	-9	0	-9	0	0	-9	14
2429	0	0	0	0	1	0	0	9
2430	3	-3	3	0	3	-6	-6	20
2432	25	-11	7	-10	0	-10	-14	36
2433	22	-13	4	-13	2	-13	-17	36
2434	5	-25	5	-25	5	-13	-25	24
2436	0	-33	0	0	0	-18	0	0
2438	0	-10	0	-10	0	-10	-10	0
2439	0	-15	0	-9	0	-9	-24	0
2440	11	-2	11	-2	-1	-2	-12	11
2442	0	-14	0	0	0	0	-14	3
2443	5	-8	5	-8	5	-6	-8	5
2444	5	-5	9	-5	5	-5	-5	9
2445	5	0	13	0	0	0	0	15
2446	0	-1	1	0	1	-1	-1	8
2447	-7	-7	0	0	0	-6	-7	2
2448	5	-17	5	1	5	-17	-17	9
2449	3	-14	3	-16	3	-3	-24	5
2450	0	-10	0	-10	0	-10	-10	5
2451	0	0	0	0	0	0	0	0
2453	0	0	0	0	7	0	0	21
2454	5	-8	5	-8	5	0	-8	9
2455	7	0	0	0	1	0	-3	13
2456	0	-6	0	-6	0	-3	-6	0
2458	0	-3	0	-3	0	-3	-7	5
2459	0	-3	0	0	0	0	-9	0
2460	104	0	142	0	0	-4	101	0
2461	104	0	142	0	0	-4	101	0
2463	0	-11	0	-11	0	-10	-25	0
2464	-2	0	13	0	0	0	0	61
2465	0	-5	0	-5	0	-5	-8	0
2466	0	-15	3	-15	0	0	-15	4
2467	0	-10	5	-10	0	-4	-10	11
2469	0	-1	0	-1	0	-1	-2	5
2471	0	0	0	0	0	0	-2	6
2472	0	-10	0	-16	0	-5	-8	7
2473	0	-3	0	-3	6	0	-3	6
2474	0	-4	0	-1	0	-4	-5	1
2475	0	0	0	0	0	5	-9	6
2476	2	0	2	0	2	0	2	0
2478	4	-9	6	-9	1	-4	-4	6
2479	3	-1	7	-2	0	-1	-2	3
2480	5	-19	0	0	0	-16	-27	9
2481	0	-9	0	-9	0	0	-5	14
2482	3	-8	0	-2	0	-6	-11	0
2483	0	-4	0	-4	0	-4	-4	13
2484	4	-4	9	-4	4	0	-8	4
2486	0	0	0	0	0	0	0	9
2488	0	-6	0	-6	2	-6	-10	4
2489	0	-7	0	0	0	0	-9	0
2490	0	-6	0	-6	0	-6	-16	0
2491	3	-5	3	-5	2	-5	-5	3
2492	0	-5	0	-6	0	0	-16	0
2493	0	0	0	0	0	0	0	16
2494	0	-5	0	-5	0	-5	-5	5
2495	0	-4	0	0	0	0	-9	0
2496	0	-3	1	0	12	0	-3	12
2498	4	0	1	0	8	0	-4	8
2499	6	0	8	0	0	0	-10	9
2500	6	-4	4	-4	0	-4	-4	6
2501	-1	-1	7	-1	7	-1	-1	7
2502	0	0	6	0	6	0	-3	6
2503	0	-10	0	-2	0	-2	-9	4
2504	0	-4	0	0	0	-4	-7	3
2506	0	-7	0	-7	0	-3	-7	0
2507	7	-9	11	-3	0	0	-10	32
2508	26	-2	26	0	3	0	-8	28
2509	0	0	0	0	0	0	0	11
2512	2	-4	2	-5	2	0	-2	4
2513	2	-35	2	-35	0	-71	-35	-71
2514	11	63	-8	0	0	0	15	0
2516	4	-3	0	-3	0	0	-9	10
2517	5	-9	5	-6	5	-6	-6	5
2518	0	-7	4	-7	4	-7	-7	7
2519	0	-4	0	-4	0	-4	-4	0
2520	2	-6	4	-4	4	-5	-10	6
2522	1	-6	1	-5	1	-4	-6	9
2523	-3	0	0	-2	0	0	-3	0
2524	1	0	3	3	13	0	0	14
2526	0	-7	3	-7	3	0	-17	6
2527	0	0	0	0	0	0	-8	4
2530	0	-8	0	-8	0	-8	-8	9
2531	16	-26	16	-30	3	-24	-30	16
2533	0	-2	0	0	0	0	-8	0
2534	5	-4	8	-3	5	-4	-4	23
2535	5	-15	9	-15	1	-14	-15	-14
2536	1	0	1	0	0	0	-3	1
2537	-9	-9	-4	-9	4	-9	-9	8
2538	0	-2	0	-2	0	0	-2	0
2539	0	-1	10	-1	0	0	-16	0
2541	0	0	0	0	0	0	-13	0
2543	0	0	0	0	0	0	0	1
2544	4	-6	4	-6	0	0	-7	5
2545	0	-9	0	-9	0	-3	-9	9
2546	5	-10	5	0	5	0	-20	9
2547	3	-8	8	-4	3	-4	-4	22
2548	2	-7	2	-7	2	-7	-7	2
2550	0	0	0	0	0	0	-8	1
2551	6	-1	9	-1	9	-1	-1	9
2552	-39	0	-10	0	0	0	-10	-5
2553	1	0	1	0	0	0	0	1
2554	-4	-9	0	-1	1	-9	-9	15
2557	25	-10	25	-10	22	22	-27	25
2558	0	-4	0	0	0	0	-4	15
2559	4	-7	4	-5	4	-5	-7	4
2560	0	-9	0	-7	0	-8	-9	0
2561	0	-8	0	-6	1	0	-13	2
2562	28	-20	36	-14	0	15	-23	36
2563	9	-8	9	-8	9	-8	-8	21
2564	-3	-3	-3	-3	-3	-3	-6	7
2565	0	-6	0	-6	0	-3	-7	0
2568	-124	-124	-112	-127	2	-126	-32	-129
2571	-6	-6	0	-6	0	-6	0	-3
2572	0	-23	0	-23	0	-23	-23	0
2573	2	-6	2	-6	0	2	-8	3
2574	-11	-9	-9	-9	0	-3	-30	16
[truncated: 1,429 more rows]
