# Supplementary material for: Ssl2/TFIIH function in transcription start site scanning by RNA polymerase II in Saccharomyces cerevisiae
Source: eLife. 2021 Oct 15;10:e71013. doi: 10.7554/eLife.71013 (PMC8589449; doi:10.7554/eLife.71013)
Supplement: Figure 5—figure supplement 2—source data 2. [file elife-71013-fig5-figsupp2-data2.csv]

X5979_Index	X6044_Index	Gene	Chromosome	Strand	TATA_class	TAF1_status	WT_TSS_Expression_Total_reads	WT_Plus_one_nuc_position	WT_TSS_median	TSS_Plusone_nuc_distance	gene	rowtotal	KruskalWallis p-values	rpb1E1103G - RPB1WT	rpb1H1085Y - RPB1WT	ssl2D522V - SSL2WT	ssl2L225P - SSL2WT	ssl2N230D - SSL2WT	ssl2N230I - SSL2WT	ssl2R636C - SSL2WT	SSL2WT - ssl2Y750	Number_of_muts_Shifted	DT_Shifted
1	1	ST3634	chrI	-	TATA-less	TAF1-enriched	0	6112	6276	-164	ST3634	12.9	0.003740058	0.090937726	0.601315655	0.010003393	0.64944207	0.015846941	0.64944207	0.965329224	0.048877107	3	TRUE
2	2	ST3637	chrI	-	TATA-less	TAF1-enriched	20	29717	29744	-27	ST3637	85.7	0.003298647	0.342751715	0.224146474	0.05851206	0.05851206	0.003689286	0.245606332	0.372935229	0.117100176	1	TRUE
3	3	CUT001	chrI	+	TATA-less	TAF1-depleted	33	30217	30203	-14	CUT001	213.1	0.002474099	0.050741857	0.373674566	0.803819375	0.803819375	0.748443585	0.243775016	0.051316635	0.803819375	0	FALSE
4	4	CUT437	chrI	-	TATA-less	TAF1-enriched	97	30710	30844	-134	CUT437	36.3	0.004444337	0.24099142	0.259090614	0.009740693	0.296673446	0.029527979	0.936017402	0.835796771	0.091833349	2	TRUE
5	5	orphan	chrI	-	TATA-less	TAF1-enriched	88	33064	33141	-77	orphan	6.8	0.076859173	NA	NA	NA	NA	NA	NA	NA	NA	NA	NA
6	6	ST3640	chrI	-	TATA-less	TAF1-enriched	314	34347	34362	-15	ST3640	179.9	0.000807812	0.000981282	1	1	1	0.317896393	1	1	1	1	TRUE
7	7	orphan	chrI	+	TATA-less	TAF1-enriched	55	NA	34678	NA	orphan	26.1	0.172870266	NA	NA	NA	NA	NA	NA	NA	NA	NA	NA
8	8	CUT438	chrI	-	TATA-less	TAF1-enriched	436	NA	34738	NA	CUT438	76.2	0.003697458	0.017354003	0.139163641	0.028993894	0.438448985	0.00481771	1	1	0.028993894	4	TRUE
9	9	YAL060W	chrI	+	TATA-containing	TAF1-depleted	198	35243	35071	-172	YAL060W	713.1	0.000141538	0.000426605	1	1	1	1	1	1	1	1	TRUE
10	10	CUT439	chrI	-	TATA-containing	TAF1-enriched	32	36322	36357	-35	CUT439	22.5	0.08148334	NA	NA	NA	NA	NA	NA	NA	NA	NA	NA
11	11	YAL058W	chrI	+	TATA-less	TAF1-enriched	12	37444	37405	-39	YAL058W	447.2	0.000141538	0.000426605	1	1	1	1	1	1	1	1	TRUE
12	12	YAL056W	chrI	+	TATA-less	TAF1-enriched	844	39267	39217	-50	YAL056W	582.3	0.001759249	0.396463292	0.00849881	0.154052561	0.885391704	0.102389552	0.961679652	0.740787475	0.154052561	1	TRUE
13	13	ST0010	chrI	+	TATA-less	TAF1-enriched	102	43637	43542	-95	ST0010	100.4	0.006557027	0.636338372	0.026666516	0.192582845	0.274588005	0.47096176	0.274588005	0.02748657	0.45165971	2	TRUE
14	14	YAL053W	chrI	+	TATA-less	TAF1-depleted	6373	45816	45757	-59	YAL053W	1436.1	0.008895982	0.964238323	0.220384148	0.112274844	0.232035836	0.009330705	0.806011343	0.767306393	0.016100308	2	TRUE
15	15	YAL051W	chrI	+	TATA-less	TAF1-enriched	252	48564	48539	-25	YAL051W	384.8	0.001173796	0.31726162	0.071831929	0.459603347	0.805295165	0.003092785	0.805295165	0.750310328	0.805295165	1	TRUE
16	16	YAL049C	chrI	-	TATA-less	TAF1-enriched	1760	52586	52661	-75	YAL049C	1263.6	0.000557488	0.156794943	0.0538452	0.092358801	0.574778414	0.029791435	0.574778414	0.468891336	0.092358801	1	TRUE
17	17	YAL047C	chrI	-	TATA-containing	TAF1-enriched	70	56830	56883	-53	YAL047C	134.5	0.000397907	0.350586815	0.023923797	0.184290677	0.888511745	0.011632718	0.674074296	0.424610799	0.050656236	2	TRUE
18	18	YAL046C	chrI	-	TATA-containing	TAF1-enriched	258	57361	57383	-22	YAL046C	1270.6	0.000603	0.061141059	0.477549894	0.04381806	0.697261897	0.004022897	0.697261897	0.615511575	0.04381806	3	TRUE
19	19	YAL044C	chrI	-	TATA-containing	TAF1-depleted	29392	58446	58476	-30	YAL044C	3091	0.00013388	0.041119594	0.160290139	0.162028301	1	0.003873554	1	1	0.025269892	3	TRUE
20	20	YAL043C	chrI	-	TATA-less	TAF1-enriched	341	61024	61072	-48	YAL043C	287.7	0.000838901	0.15002771	0.070230426	0.157285081	0.388928744	0.136217939	0.222771664	0.179233063	0.371282576	0	FALSE
21	21	YAL042W	chrI	+	TATA-less	TAF1-enriched	1335	61330	61296	-34	YAL042W	6701.1	0.000168538	0.11926909	0.11926909	0.212366195	0.168092932	0.107402158	0.168092932	0.075165703	0.212366195	0	FALSE
22	22	YAL041W	chrI	+	TATA-less	TAF1-enriched	9254	62807	62795	-12	YAL041W	154.2	0.001522761	0.522816654	0.033168958	0.253592601	0.097250205	0.140512469	0.097250205	0.146399099	0.926962882	1	TRUE
23	24	YAL040C	chrI	-	TATA-containing	TAF1-depleted	10607	67822	67848	-26	YAL040C	1762.9	0.000156534	0.00713008	1	0.010796788	1	0.000998272	1	1	1	3	TRUE
24	25	YAL039C	chrI	-	TATA-less	TAF1-enriched	466	69536	69581	-45	YAL039C	470.8	0.000306881	0.025124226	0.191427579	0.098427237	0.851347078	0.011429293	0.851347078	0.808832646	0.189587792	2	TRUE
25	26	YAL038W	chrI	+	TATA-less	TAF1-depleted	270773	71853	71759	-94	YAL038W	99353.4	0.000133552	0.000414279	1	1	1	1	1	1	1	1	TRUE
26	27	YAL036C	chrI	-	TATA-less	TAF1-enriched	536	76158	76187	-29	YAL036C	1463.4	0.000214365	0.160001127	0.178955544	0.084851212	0.197668612	0.026104753	0.197668612	0.09629487	0.357489811	1	TRUE
27	28	YAL035W	chrI	+	TATA-less	TAF1-enriched	1787	76445	76401	-44	YAL035W	10290.1	0.000221451	0.010918539	1	0.016351371	1	0.000318718	1	1	0.352676443	3	TRUE
28	29	YAL034W-A	chrI	+	TATA-less	TAF1-enriched	151	79731	79689	-42	YAL034W-A	78.3	0.014703435	0.088948698	0.48694321	0.051855345	0.871284022	0.046902401	0.330967802	0.558080295	0.581706162	1	TRUE
29	30	YAL032C	chrI	-	TATA-less	TAF1-enriched	427	84456	84494	-38	YAL032C	84.9	0.000346114	0.431617658	0.054111558	0.067480188	0.860440315	0.004238031	0.860440315	0.820443573	0.026742739	2	TRUE
30	31	YAL031C	chrI	-	TATA-less	TAF1-depleted	30	87027	87078	-51	YAL031C	416.6	0.000134167	1	0.001655877	1	1	1	0.004081634	1	1	2	TRUE
31	32	YAL029C	chrI	-	TATA-less	TAF1-enriched	526	92441	92486	-45	YAL029C	277.9	0.135089234	NA	NA	NA	NA	NA	NA	NA	NA	NA	NA
32	33	YAL028W	chrI	+	TATA-less	TAF1-enriched	40	92902	92885	-17	YAL028W	362.4	0.000428112	0.039142744	0.742795125	0.075034014	0.373397061	0.003791882	0.107599315	0.825099838	0.230819909	2	TRUE
33	34	YAL027W	chrI	+	TATA-containing	TAF1-enriched	55	94664	94625	-39	YAL027W	190.3	0.021276783	1	0.103012354	0.202517322	0.008950459	0.355117944	0.056524813	0.318879607	0.773063013	1	TRUE
34	35	YAL026C	chrI	-	TATA-less	TAF1-enriched	2957	99727	99778	-51	YAL026C	757.7	0.111763612	NA	NA	NA	NA	NA	NA	NA	NA	NA	NA
35	36	YAL025C	chrI	-	TATA-less	TAF1-enriched	246	101137	101170	-33	YAL025C	234	0.000176574	0.007676309	1	0.018333283	1	0.000929391	1	1	0.051539501	3	TRUE
36	37	YAL024C	chrI	-	TATA-less	TAF1-enriched	1199	105930	105969	-39	YAL024C	184.4	0.000909154	0.163264022	0.125506853	0.37826217	0.52911395	0.018731541	0.14196718	0.175683647	0.833834399	1	TRUE
37	38	YAL023C	chrI	-	TATA-less	TAF1-enriched	16797	108595	108632	-37	YAL023C	5979.2	0.000166667	0.067300517	0.136874894	0.19236797	0.103205641	0.067219141	0.103205641	0.376940409	0.396803481	0	FALSE
38	39	YAL022C	chrI	-	TATA-less	TAF1-enriched	1901	110405	110446	-41	YAL022C	2351.3	0.00032549	0.009821732	0.414853669	1	1	0.008227786	1	1	0.030882627	3	TRUE
39	40	YAL021C	chrI	-	TATA-less	TAF1-enriched	11944	113357	113406	-49	YAL021C	3308.8	0.001231899	0.005714028	0.627304212	0.015784884	1	0.132242732	1	1	1	2	TRUE
40	41	YAL020C	chrI	-	TATA-less	TAF1-depleted	452	114589	114619	-30	YAL020C	673.8	0.001344912	0.012183549	1	1	1	0.004334694	1	1	0.246665368	2	TRUE
41	42	YAL019W	chrI	+	TATA-less	TAF1-enriched	1693	114841	114803	-38	YAL019W	219.5	0.001302706	0.172406101	0.025142831	1	0.014170107	1	0.283202313	0.488486845	1	2	TRUE
42	43	YAL014C	chrI	-	TATA-less	TAF1-enriched	493	129003	129067	-64	YAL014C	1437.8	0.002558102	0.003227703	1	1	1	0.354664436	1	0.370933008	1	1	TRUE
43	44	YAL013W	chrI	+	TATA-less	TAF1-enriched	151	129291	129236	-55	YAL013W	201.1	0.000443516	0.383861783	0.060869786	0.020775722	0.466880741	0.01546695	0.250995913	0.490945489	0.250995913	2	TRUE
44	45	YAL012W	chrI	+	TATA-less	TAF1-depleted	52312	130828	130735	-93	YAL012W	13165.8	0.00027916	0.710750571	0.018277727	1	0.032192417	1	0.00973258	0.002277803	1	4	TRUE
45	46	YAL011W	chrI	+	TATA-less	TAF1-enriched	313	131983	131969	-14	YAL011W	250	0.223317062	NA	NA	NA	NA	NA	NA	NA	NA	NA	NA
46	47	YAL010C	chrI	-	TATA-less	TAF1-enriched	354	135652	135688	-36	YAL010C	487.7	0.000233355	0.065114979	0.580030361	0.142955793	0.133991085	0.007502326	0.133991085	0.844895578	0.142955793	1	TRUE
47	48	YAL008W	chrI	+	TATA-less	TAF1-enriched	233	136925	136866	-59	YAL008W	452.2	0.004926542	0.164448378	0.050111618	0.665262627	0.591615124	0.1126688	0.591615124	0.1126688	0.219165125	0	FALSE
48	49	YAL007C	chrI	-	TATA-less	TAF1-enriched	1258	138389	138430	-41	YAL007C	1915.5	0.000621828	0.329476708	0.022584336	0.593257296	0.267287931	0.03298258	0.267287931	0.238981557	0.593257296	2	TRUE
49	50	tP(UGG)A	chrI	-	TATA-containing	-	3	139260	139314	-54	tP(UGG)A	47.4	0.475237494	NA	NA	NA	NA	NA	NA	NA	NA	NA	NA
50	51	YAL005C	chrI	-	TATA-containing	TAF1-depleted	794	141409	141493	-84	YAL005C	12345.5	0.000133552	0.000414279	1	1	1	1	1	1	1	1	TRUE
51	52	YAL003W	chrI	+	TATA-less	TAF1-depleted	117436	142199	142153	-46	YAL003W	50356.6	0.000195594	0.006394702	1	0.018656177	1	0.003277484	1	1	0.018656177	4	TRUE
52	53	YAL002W	chrI	+	TATA-less	TAF1-enriched	895	143680	143630	-50	YAL002W	296.3	0.001425729	0.021474801	1	0.017517986	0.268766833	0.443237117	1	1	0.234902011	2	TRUE
53	54	orphan	chrI	-	TATA-less	TAF1-enriched	94	151145	151192	-47	orphan	655.7	0.000669228	0.154999836	0.097094402	0.123171964	0.73327395	0.012667738	0.211480948	0.883411718	0.123171964	1	TRUE
54	55	CUT441	chrI	-	TATA-less	TAF1-enriched	9	151837	151964	-127	CUT441	86.7	0.019818465	0.093910923	0.138027095	0.203685858	0.177793941	0.342082793	0.473499267	0.72048248	0.781656049	0	FALSE
55	56	YAR002W	chrI	+	TATA-less	TAF1-enriched	5329	152259	152215	-44	YAR002W	200.1	0.002223335	0.526377566	0.002967262	1	1	1	1	0.370269615	1	1	TRUE
56	57	YAR002C-A	chrI	-	TATA-less	TAF1-enriched	1138	154726	154740	-14	YAR002C-A	1047.9	0.000473002	0.00550935	1	0.06863727	0.559648897	0.018741023	0.559648897	0.451378698	0.06863727	2	TRUE
57	58	YAR003W	chrI	+	TATA-containing	TAF1-enriched	76	154989	154955	-34	YAR003W	121.5	0.002137233	0.182086808	0.099105526	0.742552311	0.324414902	0.016577901	0.490321135	1	0.045102273	2	TRUE
58	59	YAR007C	chrI	-	TATA-less	TAF1-enriched	492	158638	158678	-40	YAR007C	357.9	0.000737002	0.043647526	0.166015218	0.255123111	0.632445799	0.084591147	0.632445799	0.141793856	0.330519963	1	TRUE
59	60	tA(UGC)A	chrI	+	TATA-less	-	704	166463	166366	-97	tA(UGC)A	11.8	0.036229149	0.347440106	0.034196038	0.391056651	0.073627255	0.576218014	0.022664771	0.316424119	0.750048596	2	TRUE
60	61	YAR014C	chrI	-	TATA-less	TAF1-enriched	89	168977	168980	-3	YAR014C	602.6	0.002233612	0.006692893	0.233446855	1	1	0.415940806	1	1	1	1	TRUE
61	62	YAR015W	chrI	+	TATA-containing	TAF1-depleted	973	169311	169286	-25	YAR015W	5662.8	0.00076795	0.139547144	0.388762882	0.846267855	0.174724729	0.019295471	0.56080406	0.079755071	0.06992746	1	TRUE
62	63	YAR018C	chrI	-	TATA-less	TAF1-enriched	306	171693	171711	-18	YAR018C	378.3	0.004704328	0.226017205	0.019116263	0.214726812	1	0.423218165	1	1	1	1	TRUE
63	64	YAR019C	chrI	-	TATA-less	TAF1-enriched	719	175121	175164	-43	YAR019C	168.3	0.000834932	0.024858011	0.226139128	0.746401993	0.25769526	0.234105464	0.164357338	0.122414688	0.497066139	1	TRUE
64	65	tL(CAA)A	chrI	+	TATA-less	-	0	181136	181100	-36	tL(CAA)A	1	0.319967333	NA	NA	NA	NA	NA	NA	NA	NA	NA	NA
65	66	orphan	chrI	+	TATA-less	TAF1-enriched	127	181571	181446	-125	orphan	30.5	0.00524537	0.004586908	0.595068324	0.980645371	0.980645371	0.238122393	0.282142776	0.892045104	0.522925948	1	TRUE
66	67	tS(AGA)A	chrI	-	TATA-less	-	36	182406	182506	-100	tS(AGA)A	17	0.010355997	0.02299205	0.009109563	0.475099265	0.475099265	0.849986369	0.475099265	0.74065379	0.475099265	2	TRUE
67	68	orphan	chrI	+	TATA-less	TAF1-enriched	1	184719	184634	-85	orphan	17.1	0.637315458	NA	NA	NA	NA	NA	NA	NA	NA	NA	NA
68	69	YAR028W	chrI	+	TATA-less	TAF1-enriched	3102	184885	184869	-16	YAR028W	998.9	0.017381658	0.007858978	0.301674236	0.444045756	0.134268118	1	0.46410639	0.006798927	0.444045756	2	TRUE
69	70	YAR033W	chrI	+	TATA-less	TAF1-enriched	483	NA	188045	NA	YAR033W	104.7	0.001880851	0.029202085	0.723923746	0.350466076	0.979867722	0.040129945	0.186628627	0.33380493	0.065455182	2	TRUE
70	71	YAR042W	chrI	+	TATA-less	TAF1-enriched	1288	192634	192595	-39	YAR042W	362.8	0.00022753	0.334287268	0.07917714	0.123944465	0.248574147	0.018349295	0.248574147	0.136336107	0.248574147	1	TRUE
71	72	ST0047	chrI	+	TATA-less	TAF1-enriched	63	198972	198923	-49	ST0047	25.5	0.512676535	NA	NA	NA	NA	NA	NA	NA	NA	NA	NA
72	73	orphan	chrI	+	TATA-less	TAF1-enriched	563	200666	200620	-46	orphan	219.7	0.000149523	1	0.003185329	1	1	1	0.000958099	1	1	2	TRUE
73	74	orphan	chrI	+	TATA-containing	TAF1-enriched	0	NA	223048	NA	orphan	0.3	0.415880187	NA	NA	NA	NA	NA	NA	NA	NA	NA	NA
74	75	YAR073W	chrI	+	TATA-containing	TAF1-depleted	85	227528	227496	-32	YAR073W	9.1	0.190203241	NA	NA	NA	NA	NA	NA	NA	NA	NA	NA
75	76	tL(UAA)B1	chrII	+	TATA-less	-	27	9602	9572	-30	tL(UAA)B1	29.4	NA	NA	NA	NA	NA	NA	NA	NA	NA	NA	NA
76	77	YBL107C	chrII	-	TATA-containing	TAF1-enriched	709	10487	10551	-64	YBL107C	389.6	0.000163268	0.028856954	1	0.010108596	1	8.37E-05	1	1	1	3	TRUE
77	78	YBL105C	chrII	-	TATA-less	TAF1-enriched	486	17903	17938	-35	YBL105C	208.7	0.001752171	0.066611284	0.164065169	0.722512655	0.515964778	0.032708844	0.722512655	0.646639511	0.098074917	1	TRUE
78	79	YBL104C	chrII	-	TATA-less	TAF1-enriched	42	21267	21313	-46	YBL104C	269.6	0.000310259	0.028994705	0.218632025	0.218819226	0.578292888	0.009065007	0.879499564	0.844829756	0.029781411	3	TRUE
79	80	YBL103C	chrII	-	TATA-less	TAF1-enriched	150	23738	23774	-36	YBL103C	390.9	0.000392888	0.043371512	0.434506037	0.539344925	0.092979822	0.063464248	0.048765806	0.076309498	0.821093876	2	TRUE
80	81	YBL102W	chrII	+	TATA-less	TAF1-depleted	7231	24044	23992	-52	YBL102W	2724.7	0.000448677	0.026009817	0.275573253	0.252367783	0.517659435	0.020727425	0.517659435	0.403594656	0.252367783	2	TRUE
81	82	YBL100W-C	chrII	+	TATA-less	TAF1-enriched	21	28361	28298	-63	YBL100W-C	17.2	0.417378229	NA	NA	NA	NA	NA	NA	NA	NA	NA	NA
82	83	tF(GAA)B	chrII	-	TATA-less	-	34	NA	36234	NA	tF(GAA)B	42	0.014498853	0.026715698	0.508216861	0.033692764	0.399368373	0.040814212	0.166938015	0.408311392	0.311872965	3	TRUE
83	84	YBL099W	chrII	+	TATA-less	TAF1-enriched	18812	36771	36744	-27	YBL099W	8636.2	0.000199462	0.020874369	1	0.001371152	1	0.001518671	1	1	0.044461459	4	TRUE
84	85	YBL097W	chrII	+	TATA-less	TAF1-enriched	20	40807	40775	-32	YBL097W	29.6	0.002362176	0.00619322	1	0.072792318	0.169760671	0.083808405	0.423595441	0.769060191	0.376463809	1	TRUE
85	86	YBL095W	chrII	+	TATA-less	TAF1-enriched	143	43314	43267	-47	YBL095W	147.4	0.000679671	0.57140894	0.047600027	0.01747032	0.062886584	0.003337101	0.490894936	1	0.352373021	3	TRUE
86	87	YBL093C	chrII	-	TATA-less	TAF1-enriched	275	44973	44998	-25	YBL093C	1092.7	0.001792659	0.018263194	0.351957938	1	0.02889329	1	0.382131453	0.109949099	1	2	TRUE
87	88	YBL092W	chrII	+	TATA-less	TAF1-enriched	52404	45656	45613	-43	YBL092W	57143.5	NA	NA	NA	NA	NA	NA	NA	NA	NA	NA	NA
88	89	YBL091C-A	chrII	-	TATA-containing	TAF1-enriched	190	47154	47193	-39	YBL091C-A	240.6	0.002608384	0.574454076	0.029919957	0.218624692	1	0.017206778	1	1	1	2	TRUE
89	90	YBL090W	chrII	+	TATA-less	TAF1-enriched	1881	48844	48794	-50	YBL090W	369.1	0.000379054	0.025614074	0.447921607	0.787964077	0.195018359	0.062552253	0.091587339	0.218303401	0.149139255	1	TRUE
90	91	YBL088C	chrII	-	TATA-less	TAF1-enriched	17	NA	59837	NA	YBL088C	67.2	0.439252691	NA	NA	NA	NA	NA	NA	NA	NA	NA	NA
91	92	YBL087C	chrII	-	TATA-less	TAF1-enriched	6036	60767	60773	-6	YBL087C	22978.4	0.00013803	0.019166235	0.019166235	1	1	1	1	1	1	2	TRUE
92	93	YBL085W	chrII	+	TATA-less	TAF1-enriched	158	63716	63685	-31	YBL085W	491.3	0.001409272	0.175053222	0.031386154	0.645367361	0.167395155	0.222646836	0.8780809	0.255900425	0.28290459	1	TRUE
93	94	YBL084C	chrII	-	TATA-less	TAF1-enriched	792	NA	69533	NA	YBL084C	289.1	0.192984495	NA	NA	NA	NA	NA	NA	NA	NA	NA	NA
94	95	YBL082C	chrII	-	TATA-less	TAF1-enriched	593	71104	71163	-59	YBL082C	919.6	0.000145974	0.004282914	1	0.030724457	1	0.001503066	1	1	0.062517688	3	TRUE
95	96	YBL081W	chrII	+	TATA-less	TAF1-enriched	1265	71610	71552	-58	YBL081W	471.4	0.01139552	1	0.012870172	0.209359153	0.209359153	0.105098414	0.209359153	0.308867713	0.209359153	1	TRUE
96	97	YBL080C	chrII	-	TATA-less	TAF1-enriched	186	74714	74736	-22	YBL080C	93.8	0.012378866	0.004696791	1	0.507901446	0.507901446	0.34850172	0.507901446	0.392673569	0.507901446	1	TRUE
97	98	orphan	chrII	+	TATA-less	TAF1-enriched	0	74978	74972	-6	orphan	6.9	0.263063819	NA	NA	NA	NA	NA	NA	NA	NA	NA	NA
98	99	YBL079W	chrII	+	TATA-less	TAF1-enriched	817	75247	75196	-51	YBL079W	1642.3	0.000165364	0.051217374	0.148032115	0.190533916	1	0.005829385	0.535222737	1	0.032700699	2	TRUE
99	100	YBL078C	chrII	-	TATA-less	TAF1-enriched	223	80736	80752	-16	YBL078C	1516.3	0.000386357	0.007408223	1	0.117551549	0.687343338	0.002050448	0.687343338	0.603358114	0.109397243	2	TRUE
100	101	YBL076C	chrII	-	TATA-less	TAF1-enriched	2496	84250	84287	-37	YBL076C	7043.4	0.00028052	0.364958226	0.090813677	0.145514415	0.487244031	0.002794271	0.164711831	0.653845638	0.085394867	1	TRUE
101	102	YBL074C	chrII	-	TATA-less	TAF1-enriched	84	87776	87790	-14	YBL074C	207.8	0.005640913	0.086116787	0.257986491	1	1	1	0.004199015	0.423795954	1	1	TRUE
102	103	YBL072C	chrII	-	TATA-less	TAF1-enriched	922	89430	89501	-71	YBL072C	5028.2	0.000376502	0.235619537	0.098923162	1	1	0.001333435	1	1	0.012939258	2	TRUE
103	104	YBL071W-A	chrII	+	TATA-less	TAF1-enriched	295	89992	89943	-49	YBL071W-A	808.6	0.000422798	0.003855779	1	0.09478103	0.561679777	0.031016271	0.561679777	0.453720757	0.05092864	2	TRUE
104	105	YBL069W	chrII	+	TATA-containing	TAF1-enriched	1612	90717	90694	-23	YBL069W	899.7	0.00362436	0.277054602	0.111169559	1	1	1	0.118704642	0.010949079	1	1	TRUE
105	106	YBL068W	chrII	+	TATA-less	TAF1-enriched	619	92417	92357	-60	YBL068W	229.2	0.000492945	0.079597425	0.090152756	0.163846772	0.910807471	0.057343307	0.378773772	0.238956824	0.242722234	0	FALSE
106	107	YBL067C	chrII	-	TATA-less	TAF1-enriched	265	96093	96109	-16	YBL067C	789.8	0.001760931	0.382690775	0.026462084	0.17082112	0.191981929	0.011012297	0.864866005	0.826100395	0.024781076	3	TRUE
107	108	orphan	chrII	-	TATA-containing	TAF1-enriched	91	100118	100156	-38	orphan	63.4	0.022766616	0.047280725	0.468920872	0.863068255	0.5576087	0.167440043	0.678927308	0.090608466	0.944999257	1	TRUE
108	109	YBL064C	chrII	-	TATA-containing	TAF1-depleted	1090	101160	101188	-28	YBL064C	4574.9	NA	NA	NA	NA	NA	NA	NA	NA	NA	NA	NA
109	110	YBL063W	chrII	+	TATA-less	TAF1-enriched	1253	101912	101877	-35	YBL063W	25.9	0.010787354	0.396580805	0.144289308	0.135646932	0.89209444	0.329012415	0.174925915	0.224477293	0.222127575	0	FALSE
110	111	YBL061C	chrII	-	TATA-less	TAF1-enriched	247	107453	107506	-53	YBL061C	593.1	0.000155431	0.005825995	1	0.036769377	1	0.000751669	1	1	0.062242055	3	TRUE
111	112	YBL059W	chrII	+	TATA-less	TAF1-depleted	1398	110729	110700	-29	YBL059W	833.9	0.001770999	0.301769419	0.067874591	0.724480058	0.485954132	0.02289192	0.198110541	0.546374671	0.109943916	1	TRUE
112	113	orphan	chrII	-	TATA-less	TAF1-enriched	207	111179	111201	-22	orphan	14.8	0.004707437	0.008850287	0.560748745	0.439718151	0.136335004	0.557763514	0.061216198	0.042777668	0.007619148	3	TRUE
113	114	YBL058W	chrII	+	TATA-containing	TAF1-enriched	3535	111457	111409	-48	YBL058W	932.5	0.00069589	0.07139306	0.253503711	0.053124589	0.505040039	0.012536806	0.196352184	0.957635907	0.311435244	1	TRUE
114	115	YBL057C	chrII	-	TATA-less	TAF1-enriched	996	113396	113442	-46	YBL057C	968.9	0.000782233	0.301390185	0.033361538	0.068302449	0.659079685	0.018598063	0.38209425	0.821452484	0.22107987	2	TRUE
115	116	YBL056W	chrII	+	TATA-less	TAF1-enriched	806	113695	113654	-41	YBL056W	2267.9	0.000291763	0.040271304	0.147691703	0.602800536	0.218422394	0.062024121	0.07851446	0.822808043	0.309641297	1	TRUE
116	117	YBL055C	chrII	-	TATA-less	TAF1-depleted	814	116669	116815	-146	YBL055C	793.6	0.000410617	0.153746329	0.037507196	0.10187867	0.439436226	0.112626826	0.257956588	0.318217945	0.411090652	1	TRUE
117	118	YBL054W	chrII	+	TATA-less	TAF1-enriched	3302	117634	117478	-156	YBL054W	204.1	0.002492776	0.162759109	0.077869917	0.166291414	0.499031808	0.046063396	0.209313844	0.603424472	0.723262047	1	TRUE
118	119	YBL051C	chrII	-	TATA-less	TAF1-enriched	2290	124784	124822	-38	YBL051C	2563	0.000133552	0.012865581	1	0.006432383	1	0.000435121	1	1	0.069279883	3	TRUE
119	120	YBL050W	chrII	+	TATA-less	TAF1-enriched	4033	125087	125042	-45	YBL050W	955.3	0.000308226	0.103593835	0.068304011	1	1	0.004312755	0.41210602	0.628815449	1	1	TRUE
120	121	ST3710	chrII	-	TATA-less	TAF1-enriched	36	127363	127512	-149	ST3710	175	0.091437919	NA	NA	NA	NA	NA	NA	NA	NA	NA	NA
121	122	YBL047C	chrII	-	TATA-less	TAF1-enriched	233	132164	132196	-32	YBL047C	4466.2	0.000457808	0.140758311	0.01780901	0.853890739	0.0750467	0.812078935	0.0750467	0.383354924	0.853890739	1	TRUE
122	123	YBL046W	chrII	+	TATA-less	TAF1-enriched	94	132473	132413	-60	YBL046W	380.5	0.000380642	0.064629681	0.233207859	0.227056588	0.378049515	0.03889741	0.124917586	0.118880451	0.492960423	1	TRUE
123	124	YBL045C	chrII	-	TATA-less	TAF1-enriched	2521	135679	135702	-23	YBL045C	1906.1	0.003771932	1	0.008120212	0.598045089	0.050203865	0.496105539	0.050203865	0.355636096	0.598045089	1	TRUE
124	125	YBL042C	chrII	-	TATA-containing	TAF1-depleted	154	140319	140326	-7	YBL042C	807.2	0.000543288	0.004282914	1	0.450635773	0.801464792	0.003222742	0.801464792	0.745466471	0.107146078	2	TRUE
125	126	YBL041W	chrII	+	TATA-less	TAF1-enriched	8168	141261	141225	-36	YBL041W	3180.3	0.00297118	1	0.345778586	1	1	1	1	1	6.23E-06	1	TRUE
126	127	YBL040C	chrII	-	TATA-less	TAF1-enriched	830	142845	142900	-55	YBL040C	546.4	0.000215625	0.019965499	0.096484762	0.343737095	1	0.014499464	1	1	1	2	TRUE
127	128	YBL039W-B	chrII	+	TATA-less	TAF1-enriched	30	NA	143183	NA	YBL039W-B	262.1	0.026536562	0.326336782	0.043213917	0.568884088	0.076182611	0.860215841	0.417703289	0.779717419	0.647411333	1	TRUE
128	129	YBL039C	chrII	-	TATA-less	TAF1-enriched	180	145752	145782	-30	YBL039C	7600.6	0.000293564	0.013708556	0.672631625	0.00693259	1	0.002809915	1	1	1	3	TRUE
129	130	YBL038W	chrII	+	TATA-less	TAF1-enriched	5178	146169	146124	-45	YBL038W	1148.8	0.000155414	0.044358535	0.099947645	0.124748585	0.229589622	0.047494719	0.181906661	1	0.593367165	2	TRUE
130	131	YBL037W	chrII	+	TATA-less	TAF1-depleted	169	147118	147126	8	YBL037W	587.8	0.000256448	0.030085458	1	0.027104384	0.36826508	0.004329333	0.102366708	0.830340142	0.170240987	3	TRUE
131	132	YBL036C	chrII	-	TATA-less	TAF1-enriched	780	151195	151236	-41	YBL036C	1733.8	0.509161945	NA	NA	NA	NA	NA	NA	NA	NA	NA	NA
132	133	YBL035C	chrII	-	TATA-containing	TAF1-enriched	50	153636	153688	-52	YBL035C	635.3	0.001747857	0.1741529	0.066683027	1	0.315178111	0.090963828	0.04455494	0.516760037	1	1	TRUE
133	134	YBL034C	chrII	-	TATA-less	TAF1-depleted	391	158427	158464	-37	YBL034C	152.4	0.07918344	NA	NA	NA	NA	NA	NA	NA	NA	NA	NA
134	135	YBL033C	chrII	-	TATA-containing	TAF1-enriched	2013	159678	159721	-43	YBL033C	1614.5	0.07918344	NA	NA	NA	NA	NA	NA	NA	NA	NA	NA
135	136	YBL032W	chrII	+	TATA-less	TAF1-enriched	9884	160147	160094	-53	YBL032W	490.5	0.000846329	1	1	0.377176982	0.044742467	0.588332012	0.044742467	0.009566604	0.675030424	3	TRUE
136	137	YBL031W	chrII	+	TATA-less	TAF1-enriched	355	161724	161669	-55	YBL031W	716.7	0.000147059	0.02407107	0.116557924	0.053104057	1	0.012529187	1	1	1	2	TRUE
137	138	YBL030C	chrII	-	TATA-containing	TAF1-depleted	79034	164107	164125	-18	YBL030C	11259.1	0.00141521	0.019299746	0.072851097	1	1	1	1	0.440079869	1	1	TRUE
138	139	YBL029C-A	chrII	-	TATA-less	TAF1-depleted	444	164688	164811	-123	YBL029C-A	1111.3	0.016812692	0.167116463	0.454670803	0.789416327	0.605622084	0.154126087	0.605622084	0.872172753	0.019679695	1	TRUE
139	140	YBL029W	chrII	+	TATA-containing	TAF1-depleted	100	166224	166098	-126	YBL029W	36.1	0.001925964	0.137116337	0.268002438	0.346203437	0.174753167	0.208640347	0.07636176	0.057923661	0.98726172	0	FALSE
140	141	ST3723	chrII	-	TATA-less	TAF1-enriched	28	166853	166954	-101	ST3723	311.6	0.005591063	0.040928363	1	0.179070818	0.093049409	0.057007891	0.390657917	0.772503849	0.279091816	1	TRUE
141	142	YBL028C	chrII	-	TATA-less	TAF1-enriched	175	167808	167890	-82	YBL028C	4023.3	0.000198958	0.102839869	0.032911695	0.073948326	1	0.021059252	1	1	0.073948326	2	TRUE
142	143	YBL027W	chrII	+	TATA-less	TAF1-depleted	18516	168595	168392	-203	YBL027W	12992.1	NA	NA	NA	NA	NA	NA	NA	NA	NA	NA	NA
143	144	ST3726	chrII	-	TATA-less	TAF1-enriched	18	170358	170387	-29	ST3726	16.1	0.093763841	NA	NA	NA	NA	NA	NA	NA	NA	NA	NA
144	145	YBL026W	chrII	+	TATA-less	TAF1-enriched	628	NA	170558	NA	YBL026W	2467.1	0.001168404	0.777185384	0.004656423	0.352373021	0.16827362	0.229898636	0.190573774	0.229898636	0.352373021	1	TRUE
145	146	YBL025W	chrII	+	TATA-less	TAF1-enriched	405	NA	171433	NA	YBL025W	226.7	0.000874267	0.077005445	0.020753782	1	0.332767148	1	0.332767148	0.211153672	1	1	TRUE
146	147	YBL024W	chrII	+	TATA-less	TAF1-enriched	994	172551	172509	-42	YBL024W	5752.4	0.000752711	0.006097914	1	0.042487334	0.402376497	0.046049058	0.402376497	0.279671007	0.337939697	3	TRUE
147	148	YBL021C	chrII	-	TATA-less	TAF1-enriched	371	182071	182118	-47	YBL021C	317.2	0.000349421	0.219699423	0.085749407	0.037166642	0.501434037	0.021459143	0.501434037	0.385475476	0.226269996	2	TRUE
148	149	YBL020W	chrII	+	TATA-less	TAF1-enriched	219	182347	182320	-27	YBL020W	1482.4	0.000170853	0.209223413	0.048467236	0.138341303	0.399035013	0.055716198	0.151895202	0.074033924	0.915231896	1	TRUE
149	150	YBL018C	chrII	-	TATA-less	TAF1-enriched	303	186457	186504	-47	YBL018C	616.8	0.000679602	0.380390009	0.01503746	0.595402266	0.067387313	0.492997668	0.118912218	0.079781016	0.595402266	1	TRUE
150	151	YBL017C	chrII	-	TATA-less	TAF1-enriched	599	191553	191678	-125	YBL017C	605	0.000496854	0.145870599	0.096507476	0.169559067	0.993514913	0.02039607	0.272522506	0.289232973	0.169559067	1	TRUE
151	152	YBL016W	chrII	+	TATA-containing	TAF1-depleted	226	192555	192369	-186	YBL016W	410	0.000721517	0.393058579	0.111753034	0.032568204	0.704628402	0.010739061	0.177998238	0.422687727	0.13566672	2	TRUE
152	153	YBL015W	chrII	+	TATA-containing	TAF1-depleted	1746	194303	194033	-270	YBL015W	265.4	0.009993216	0.749551308	0.01460139	0.105799954	0.668372573	0.036797238	0.105799954	0.954997178	0.105799954	2	TRUE
153	154	YBL014C	chrII	-	TATA-less	TAF1-enriched	47	201730	201777	-47	YBL014C	355.2	0.000316667	0.039998275	0.105636904	0.116873066	1	0.042936834	0.43302997	0.36698019	1	2	TRUE
154	155	YBL013W	chrII	+	TATA-less	TAF1-enriched	197	202035	202036	1	YBL013W	77.3	0.803973619	NA	NA	NA	NA	NA	NA	NA	NA	NA	NA
155	156	YBL011W	chrII	+	TATA-less	TAF1-enriched	1065	203511	203445	-66	YBL011W	1601.4	0.005324143	1	0.007067982	0.732266485	0.732266485	0.658731711	0.016630107	0.543658977	0.732266485	2	TRUE
156	157	YBL010C	chrII	-	TATA-less	TAF1-enriched	22	206911	206951	-40	YBL010C	128.2	0.00457104	0.028007058	0.336416663	0.986664322	0.986664322	0.376310263	0.493156249	0.080489666	0.043128525	2	TRUE
157	158	YBL009W	chrII	+	TATA-less	TAF1-enriched	330	207210	207159	-51	YBL009W	179.5	0.001561849	0.327621923	0.012913947	0.506796344	0.268557506	0.218482473	0.824875891	0.153192846	0.506796344	1	TRUE
158	159	YBL008W	chrII	+	TATA-less	TAF1-enriched	31	209636	209598	-38	YBL008W	89	0.001728778	1	0.003534657	0.531382984	0.339418245	0.050432205	0.692619356	0.383306398	0.156628557	1	TRUE
159	160	YBL007C	chrII	-	TATA-containing	TAF1-enriched	311	216362	216415	-53	YBL007C	2871.7	0.000168129	0.133706234	0.090151421	0.100428579	0.576472282	0.033937027	0.148276547	0.149258088	0.392969088	1	TRUE
160	161	YBL006C	chrII	-	TATA-less	TAF1-enriched	678	217097	217150	-53	YBL006C	1563.9	0.000312255	0.406041336	0.013779292	0.021001051	0.558468354	0.016754571	0.819999281	0.462704231	0.162178551	3	TRUE
161	162	YBL005W	chrII	+	TATA-less	TAF1-enriched	827	217562	217555	-7	YBL005W	290.6	0.112224725	NA	NA	NA	NA	NA	NA	NA	NA	NA	NA
162	163	orphan	chrII	-	TATA-less	TAF1-enriched	245	220917	220982	-65	orphan	240.8	0.000961455	0.046880236	0.219634805	0.124353874	0.564424403	0.047262614	0.236183459	0.852449228	0.124353874	2	TRUE
163	164	tS(AGA)B	chrII	+	TATA-less	-	28	227282	227202	-80	tS(AGA)B	39.4	0.02555079	0.432227361	0.1574516	0.688055482	0.688055482	0.843468853	0.030739613	0.921353294	0.688055482	1	TRUE
164	165	YBL004W	chrII	+	TATA-less	TAF1-enriched	210	227580	227522	-58	YBL004W	2265.3	0.000178248	0.144645949	0.042600903	0.137258636	0.256571356	0.103163096	0.137258636	0.274240677	0.362389347	1	TRUE
165	166	YBL003C	chrII	-	TATA-containing	TAF1-depleted	2179	235757	235846	-89	YBL003C	11619	0.003741436	0.010925908	1	0.311650697	0.311650697	0.191490579	0.311650697	0.191490579	0.311650697	1	TRUE
166	167	ST3737	chrII	-	TATA-less	TAF1-enriched	25	235920	235996	-76	ST3737	8032.5	0.000693053	0.002996232	1	0.010260974	1	0.097533185	1	1	1	2	TRUE
167	168	YBL002W	chrII	+	TATA-containing	TAF1-depleted	29896	236541	236458	-83	YBL002W	5701.3	0.000573563	0.115669443	0.109078931	0.139934911	0.393267999	0.00634164	0.904737921	0.439806106	0.054501055	1	TRUE
168	169	ST0101	chrII	+	TATA-less	TAF1-enriched	60	NA	238527	NA	ST0101	26.9	0.490164914	NA	NA	NA	NA	NA	NA	NA	NA	NA	NA
169	170	YBR001C	chrII	-	TATA-containing	TAF1-depleted	39	241189	241415	-226	YBR001C	426.5	0.000510447	0.007405155	1	0.10778895	0.559760396	0.011325319	0.559760396	0.451507212	0.049801603	3	TRUE
170	171	YBR002C	chrII	-	TATA-less	TAF1-enriched	109	242541	242588	-47	YBR002C	724.5	0.00043409	0.036431442	0.179376384	0.106050573	0.81740333	0.036932609	0.378432837	0.765647748	0.106050573	2	TRUE
171	172	YBR003W	chrII	+	TATA-less	TAF1-enriched	705	242830	242780	-50	YBR003W	232.2	0.001740917	0.716529283	0.031790636	0.076292575	0.320031278	0.207153811	0.585922197	0.031202665	0.855908484	2	TRUE
172	173	YBR005W	chrII	+	TATA-less	TAF1-depleted	929	245894	245859	-35	YBR005W	5359.9	0.011794569	0.029328508	0.002089821	0.40164709	0.099947249	0.90057817	0.605775658	0.884116505	0.40164709	2	TRUE
173	174	ST3742	chrII	-	TATA-containing	TAF1-enriched	131	248461	248558	-97	ST3742	42.3	0.007228353	0.527199938	0.120996034	0.187067417	0.165970088	0.009991831	0.817409393	0.654807338	0.187067417	1	TRUE
174	175	YBR007C	chrII	-	TATA-less	TAF1-depleted	94	250937	250975	-38	YBR007C	187.8	0.056713443	NA	NA	NA	NA	NA	NA	NA	NA	NA	NA
175	176	YBR008C	chrII	-	TATA-less	TAF1-enriched	71	254381	254427	-46	YBR008C	300.5	0.000342494	0.00736402	1	1	1	0.00038312	1	1	0.233769516	2	TRUE
176	177	CUT009	chrII	+	TATA-containing	TAF1-depleted	158	254872	254792	-80	CUT009	67.3	0.07768477	NA	NA	NA	NA	NA	NA	NA	NA	NA	NA
177	178	YBR009C	chrII	-	TATA-containing	TAF1-depleted	2223	255665	255721	-56	YBR009C	15174.2	0.000310788	0.01898699	0.39138176	0.210607961	0.531349228	0.01071437	0.210607961	0.225457814	0.106465352	2	TRUE
178	179	orphan	chrII	+	TATA-less	TAF1-enriched	35	256148	256102	-46	orphan	32.5	0.066259089	NA	NA	NA	NA	NA	NA	NA	NA	NA	NA
179	180	YBR010W	chrII	+	TATA-containing	TAF1-depleted	7747	256369	256303	-66	YBR010W	7630.2	0.00281972	0.172787972	0.069104894	1	0.038657629	1	1	0.026107271	1	2	TRUE
180	181	YBR011C	chrII	-	TATA-less	TAF1-enriched	30377	257978	258014	-36	YBR011C	10064.4	0.00612824	0.337890495	0.078050357	0.111463708	0.812614874	0.039897421	0.812614874	0.284113664	0.111463708	1	TRUE
181	182	orphan	chrII	-	TATA-less	TAF1-enriched	2	258136	258198	-62	orphan	43.7	0.034885428	0.740865612	0.030416079	0.079477781	0.638850592	0.856604095	0.862728158	0.957615046	0.079477781	1	TRUE
182	183	YBR014C	chrII	-	TATA-less	TAF1-depleted	133	267202	267396	-194	YBR014C	1240.8	0.022498252	0.308489513	0.237702175	0.90348462	0.644949055	0.027658863	0.268071957	0.375025941	0.777221744	1	TRUE
183	184	YBR015C	chrII	-	TATA-less	TAF1-enriched	1789	269566	269599	-33	YBR015C	1053.7	0.00028278	0.008675102	0.714775134	0.016306335	1	0.004156548	1	1	0.068806789	3	TRUE
184	185	YBR016W	chrII	+	TATA-containing	TAF1-enriched	55499	270232	270231	-1	YBR016W	1484.4	0.000381543	0.039212411	0.4724129	0.171017454	1	0.003545063	1	0.15740975	0.132109272	2	TRUE
185	186	YBR017C	chrII	-	TATA-less	TAF1-enriched	1279	273701	273755	-54	YBR017C	1255.5	0.000439547	0.029871223	0.228242188	0.144727798	0.448618049	0.059727731	0.23744668	0.327968715	0.348775647	1	TRUE
186	187	ST0112	chrII	+	TATA-less	TAF1-enriched	89	276986	276820	-166	ST0112	193.1	0.000907737	0.00598322	0.749259273	0.111147797	0.563465764	0.019921194	0.563465764	0.455782656	0.739424216	2	TRUE
187	188	CUT445	chrII	-	TATA-less	TAF1-enriched	9	NA	280863	NA	CUT445	10.2	0.0108393	0.312244188	0.053883824	0.088561202	0.394481476	0.031190118	0.759188501	1	0.394481476	1	TRUE
188	189	YBR021W	chrII	+	TATA-less	TAF1-enriched	571	281503	281353	-150	YBR021W	70.9	0.019338412	0.150429998	0.254941814	0.993453822	0.711976489	0.314301248	0.133245632	0.124578493	0.320833949	0	FALSE
189	190	YBR022W	chrII	+	TATA-less	TAF1-depleted	123	283853	283724	-129	YBR022W	101.5	0.003983413	0.041440341	0.168700762	0.352000379	0.314813307	0.163378798	1	1	0.314813307	1	TRUE
190	191	YBR023C	chrII	-	TATA-less	TAF1-enriched	232	288035	288069	-34	YBR023C	1229.2	0.000399694	0.032161145	0.056863658	1	0.391556055	0.064090037	1	1	1	1	TRUE
191	192	orphan	chrII	-	TATA-containing	TAF1-enriched	4	288300	288311	-11	orphan	2	0.028246506	0.865209909	0.045177009	0.509153117	0.110404084	0.285405966	0.118672242	0.027702865	0.272261329	2	TRUE
192	193	YBR024W	chrII	+	TATA-less	TAF1-enriched	1626	289381	289332	-49	YBR024W	286.3	0.000358952	0.365392101	0.04358987	0.006013873	0.909410561	0.002185833	0.076436196	0.883217261	0.24846935	3	TRUE
193	194	orphan	chrII	-	TATA-less	TAF1-enriched	56	290205	290530	-325	orphan	124.5	0.075489525	NA	NA	NA	NA	NA	NA	NA	NA	NA	NA
194	195	YBR025C	chrII	-	TATA-less	TAF1-enriched	3027	291754	291898	-144	YBR025C	8266.1	0.000149851	0.165596137	0.080431482	0.150921833	0.228142703	0.063705781	0.228142703	0.119743531	0.150921833	0	FALSE
195	196	orphan	chrII	+	TATA-less	TAF1-enriched	48	NA	292331	NA	orphan	36.8	0.770635236	NA	NA	NA	NA	NA	NA	NA	NA	NA	NA
196	197	YBR026C	chrII	-	TATA-less	TAF1-depleted	2260	293948	294052	-104	YBR026C	244	0.000977748	0.060250303	0.362759219	0.126601784	0.834412671	0.032496171	0.281306665	0.129655638	0.281306665	1	TRUE
197	198	YBR028C	chrII	-	TATA-less	TAF1-enriched	156	296023	296083	-60	YBR028C	508.1	0.00044533	0.06421324	0.145049792	0.141935451	0.306946672	0.069747292	0.201580265	0.343133949	0.322309405	0	FALSE
198	199	YBR029C	chrII	-	TATA-less	TAF1-enriched	8765	297772	297822	-50	YBR029C	935.8	0.00129778	0.001317931	1	1	1	0.256111508	1	1	1	1	TRUE
199	200	orphan	chrII	+	TATA-less	TAF1-enriched	7	298060	298021	-39	orphan	33.9	0.547788038	NA	NA	NA	NA	NA	NA	NA	NA	NA	NA
200	201	YBR030W	chrII	+	TATA-less	TAF1-enriched	15	298274	298203	-71	YBR030W	312.3	0.002946615	0.054031442	0.162014773	0.376137887	0.496000604	0.103955601	0.134197924	0.860466184	0.891695434	0	FALSE
201	202	CUT446	chrII	-	TATA-less	TAF1-enriched	2	299867	299891	-24	CUT446	36.2	0.003240059	0.044412185	0.162866148	0.834225818	0.834225818	0.0219805	0.834225818	0.78701741	0.263046554	2	TRUE
202	203	YBR031W	chrII	+	TATA-containing	TAF1-depleted	725309	300178	300150	-28	YBR031W	53023.9	NA	NA	NA	NA	NA	NA	NA	NA	NA	NA	NA
203	204	YBR034C	chrII	-	TATA-containing	TAF1-depleted	1578	305977	306005	-28	YBR034C	1252.1	0.000613417	0.807924016	0.024530205	0.27562533	0.123659219	0.022112193	0.094376787	0.372533573	0.745511704	2	TRUE
204	205	CUT011	chrII	+	TATA-containing	TAF1-enriched	436	306313	306279	-34	CUT011	222.8	NA	NA	NA	NA	NA	NA	NA	NA	NA	NA	NA
205	206	YBR035C	chrII	-	TATA-less	TAF1-enriched	47636	306956	306982	-26	YBR035C	7143.1	0.008045345	0.278240147	0.11081712	0.100606983	0.861337264	0.034030752	0.463178557	0.856838078	0.100606983	1	TRUE
206	207	orphan	chrII	-	TATA-containing	TAF1-depleted	15682	307284	307344	-60	orphan	57461.8	0.000216173	0.048110588	0.180940705	0.125479741	0.109867437	0.047925674	0.109867437	0.863435691	0.689379471	2	TRUE
207	208	orphan	chrII	+	TATA-less	TAF1-enriched	1678	307608	307579	-29	orphan	7217.7	0.001012921	0.00516077	1	1	0.15096232	1	0.15096232	1	1	1	TRUE
208	209	YBR036C	chrII	-	TATA-less	TAF1-enriched	1950	310332	310361	-29	YBR036C	5034.9	0.00297118	1	1	1	1	1	6.23E-06	0.182422439	1	1	TRUE
209	210	YBR037C	chrII	-	TATA-less	TAF1-enriched	89	311440	311468	-28	YBR037C	624.4	0.000400515	0.058797027	0.141623279	0.105604406	0.537833359	0.021375982	0.537833359	0.426397016	0.304504704	1	TRUE
210	211	YBR038W	chrII	+	TATA-less	TAF1-enriched	1842	311993	311843	-150	YBR038W	283.5	0.000209141	0.284701635	0.037507196	0.059012138	0.328764768	0.014787972	0.171547921	0.866500249	0.268372217	2	TRUE
211	212	YBR039W	chrII	+	TATA-less	TAF1-enriched	2425	315566	315496	-70	YBR039W	4621.7	0.000339496	0.265828883	0.055320511	0.41643855	1	0.035890646	0.090465188	0.060161877	1	1	TRUE
212	213	YBR042C	chrII	-	TATA-less	TAF1-enriched	149	321611	321636	-25	YBR042C	193.7	0.001180323	0.078557407	0.162966741	0.04269403	0.464817197	0.031982563	0.973495607	0.440075187	0.506377494	2	TRUE
213	214	YBR043C	chrII	-	TATA-less	TAF1-enriched	59	324014	324023	-9	YBR043C	424.2	0.000384271	1	0.006463835	0.220999028	0.007423396	1	1	0.004186174	1	3	TRUE
214	215	ANT014	chrII	+	TATA-less	TAF1-enriched	112	324489	324413	-76	ANT014	46.5	0.029552199	0.619025875	0.131985386	0.409346203	0.085036786	0.002446123	0.012732876	0.612357295	0.02542852	3	TRUE
215	216	tV(UAC)B	chrII	+	TATA-less	-	0	NA	326878	NA	tV(UAC)B	1.7	0.081364546	NA	NA	NA	NA	NA	NA	NA	NA	NA	NA
216	217	orphan	chrII	+	TATA-less	TAF1-enriched	28	NA	327303	NA	orphan	1.6	0.115649874	NA	NA	NA	NA	NA	NA	NA	NA	NA	NA
217	218	YBR046C	chrII	-	TATA-less	TAF1-enriched	237	331527	331542	-15	YBR046C	499.8	0.000763523	0.003814685	1	1	1	0.004882488	1	1	1	2	TRUE
218	219	YBR048W	chrII	+	TATA-less	TAF1-enriched	18374	332851	332811	-40	YBR048W	22768.9	0.00021168	0.02299205	1	0.033644428	0.420374406	0.006097914	0.067055825	1	1	3	TRUE
219	220	YBR049C	chrII	-	TATA-less	TAF1-enriched	464	336836	336957	-121	YBR049C	645	0.002149599	0.023217949	0.244107745	0.229231552	0.229231552	0.120610746	0.539586015	0.347332197	0.737363549	1	TRUE
220	221	orphan	chrII	+	TATA-less	TAF1-enriched	35	337258	337210	-48	orphan	152.9	0.470914386	NA	NA	NA	NA	NA	NA	NA	NA	NA	NA
221	222	orphan	chrII	-	TATA-less	TAF1-enriched	45	338565	338796	-231	orphan	38.2	0.576102206	NA	NA	NA	NA	NA	NA	NA	NA	NA	NA
222	223	YBR052C	chrII	-	TATA-less	TAF1-depleted	9302	339378	339413	-35	YBR052C	1290.9	0.000409664	0.309673237	0.098769132	0.059205433	0.459897195	0.00451491	0.868792985	0.831122804	0.005849592	2	TRUE
223	224	YBR053C	chrII	-	TATA-less	TAF1-enriched	235	340746	340763	-17	YBR053C	1002.8	0.000704392	0.094558241	0.16966305	0.076035909	0.248993195	0.041638359	0.242343195	0.224814194	0.737466042	1	TRUE
224	226	orphan	chrII	-	TATA-less	TAF1-enriched	21	341347	341378	-31	orphan	81.6	0.034868658	0.792175877	0.017722012	0.245009608	0.142314557	0.541403399	0.245009608	0.892960331	0.485468842	1	TRUE
225	227	orphan	chrII	+	TATA-less	TAF1-enriched	48	NA	341631	NA	orphan	11.5	0.086474453	NA	NA	NA	NA	NA	NA	NA	NA	NA	NA
226	228	orphan	chrII	+	TATA-less	TAF1-enriched	20	342061	342001	-60	orphan	43.9	0.92503154	NA	NA	NA	NA	NA	NA	NA	NA	NA	NA
227	229	orphan	chrII	+	TATA-less	TAF1-enriched	5	342261	342193	-68	orphan	42.8	0.491852963	NA	NA	NA	NA	NA	NA	NA	NA	NA	NA
228	230	YBR054W	chrII	+	TATA-containing	TAF1-depleted	5754	343197	342787	-410	YBR054W	3795.7	0.000905205	0.223620812	0.157153015	0.154226542	0.363782889	0.032311249	0.363782889	0.241014058	0.154226542	1	TRUE
229	231	orphan	chrII	-	TATA-less	TAF1-enriched	12	344101	344161	-60	orphan	2.6	0.40221068	NA	NA	NA	NA	NA	NA	NA	NA	NA	NA
230	232	YBR055C	chrII	-	TATA-containing	TAF1-enriched	410	347266	347318	-52	YBR055C	390.9	0.000270898	0.056377453	0.108835154	0.860569516	0.860569516	0.006072836	0.860569516	0.820608664	0.022404457	2	TRUE
231	233	YBR056W	chrII	+	TATA-less	TAF1-enriched	3395	348020	347867	-153	YBR056W	1556.7	0.000567693	0.036964565	0.548133196	0.048422577	0.603496323	0.010835502	0.603496323	0.502529113	0.048422577	4	TRUE
232	234	tQ(UUG)B	chrII	+	TATA-less	-	59	350834	350819	-15	tQ(UUG)B	16.1	0.001086688	1	0.000985929	0.698997632	0.698997632	0.617642811	0.698997632	0.617642811	0.698997632	1	TRUE
233	235	YBR056W-A	chrII	+	TATA-less	TAF1-enriched	141	351285	351157	-128	YBR056W-A	896.3	0.00042829	0.035753043	0.365969819	0.433812525	0.155139425	0.094855875	0.07622547	0.201067092	0.195725853	1	TRUE
234	236	YBR057C	chrII	-	TATA-less	TAF1-enriched	298	353359	353381	-22	YBR057C	917.7	0.000560918	0.033146141	0.557467864	0.18716518	0.326689594	0.009992563	0.326689594	0.205437183	0.343647542	2	TRUE
235	237	YBR058C-A	chrII	-	TATA-less	TAF1-enriched	1922	356567	356612	-45	YBR058C-A	8378.5	0.000713803	0.230858727	0.063292362	0.121045724	0.380085242	0.04533242	0.254186035	0.51827605	0.121045724	1	TRUE
236	238	YBR059C	chrII	-	TATA-less	TAF1-enriched	6858	360280	360307	-27	YBR059C	249.4	0.012167269	0.365598891	0.199086505	0.879295485	0.648686906	0.025146995	0.38363925	0.598715339	0.091704996	1	TRUE
237	239	CUT018	chrII	+	TATA-less	TAF1-enriched	4	360668	360615	-53	CUT018	8.6	0.471326845	NA	NA	NA	NA	NA	NA	NA	NA	NA	NA
238	240	YBR060C	chrII	-	TATA-less	TAF1-depleted	75	362567	362568	-1	YBR060C	636.2	0.000201405	0.082481204	0.063421652	0.206707633	0.882670405	0.059545743	0.301559903	0.103080245	0.882670405	0	FALSE
239	241	ST0138	chrII	+	TATA-less	TAF1-enriched	58	362900	362886	-14	ST0138	365.5	0.044116257	0.07541986	0.632585122	0.075774449	0.737240398	0.466034973	0.298682576	0.208693187	0.466428611	0	FALSE
240	242	YBR061C	chrII	-	TATA-less	TAF1-enriched	143	365694	365743	-49	YBR061C	516.5	0.00283781	0.038529752	0.144127035	0.297566248	0.297566248	0.17869439	0.208271231	0.838035105	0.634786973	1	TRUE
241	243	YBR062C	chrII	-	TATA-less	TAF1-enriched	354	NA	366622	NA	YBR062C	157.1	0.038034693	0.368702926	0.028717928	0.799201	0.485491754	0.742605584	0.78655025	0.215173925	0.799201	1	TRUE
242	244	YBR065C	chrII	-	TATA-less	TAF1-enriched	145	369688	369720	-32	YBR065C	509.5	0.000192363	0.056974476	0.165426119	0.231636557	0.365360793	0.054876738	0.128652138	0.117560442	0.476943848	0	FALSE
243	245	CUT020	chrII	+	TATA-less	TAF1-enriched	197	370029	369956	-73	CUT020	6.4	0.030449698	0.915228353	0.110334217	0.443517049	0.320568267	0.012609078	0.182650159	0.796357116	0.35089866	1	TRUE
244	246	YBR066C	chrII	-	TATA-containing	TAF1-enriched	2448	370731	370737	-6	YBR066C	336.8	0.057032677	NA	NA	NA	NA	NA	NA	NA	NA	NA	NA
245	247	orphan	chrII	-	TATA-less	TAF1-enriched	722	370932	370974	-42	orphan	126.2	0.042479483	0.747042361	0.713973626	0.579523732	0.133190483	0.006814903	0.237828266	0.942149751	0.054958207	1	TRUE
246	248	ST0142	chrII	+	TATA-less	TAF1-enriched	27	371525	371436	-89	ST0142	47.1	0.011285923	0.177967426	0.24303496	0.506675169	0.021245768	0.28510674	0.436101556	0.775069387	0.060476789	1	TRUE
247	249	YBR067C	chrII	-	TATA-containing	TAF1-depleted	62945	372699	372786	-87	YBR067C	3406.7	0.000146956	0.016519248	0.165175451	0.097206027	1	0.012488015	1	1	0.097206027	2	TRUE
248	250	orphan	chrII	+	TATA-less	TAF1-depleted	43	373492	373486	-6	orphan	26.2	0.079783913	NA	NA	NA	NA	NA	NA	NA	NA	NA	NA
249	251	orphan	chrII	-	TATA-less	TAF1-enriched	63	374724	374789	-65	orphan	46.7	0.899799773	NA	NA	NA	NA	NA	NA	NA	NA	NA	NA
250	252	YBR068C	chrII	-	TATA-containing	TAF1-depleted	198	375627	375729	-102	YBR068C	3348.3	0.00044634	0.041798387	1	0.049301969	0.257666952	0.011146965	0.075283119	0.531135274	0.111497033	3	TRUE
251	253	CUT021	chrII	+	TATA-less	TAF1-enriched	62	376588	376504	-84	CUT021	75.1	0.008569649	0.341817085	0.12658218	0.816200066	0.064287087	0.028054	0.816200066	0.764121884	0.338247986	1	TRUE
252	254	YBR069C	chrII	-	TATA-containing	TAF1-depleted	1714	378536	378538	-2	YBR069C	3388	NA	NA	NA	NA	NA	NA	NA	NA	NA	NA	NA
253	255	CUT022	chrII	+	TATA-less	TAF1-depleted	30	379293	379263	-30	CUT022	13.3	0.304543564	NA	NA	NA	NA	NA	NA	NA	NA	NA	NA
254	256	YBR070C	chrII	-	TATA-less	TAF1-enriched	324	379956	379964	-8	YBR070C	803.5	0.000608774	0.031280705	0.163489662	0.056386921	0.145104357	0.022364826	1	1	0.385784322	2	TRUE
255	257	YBR071W	chrII	+	TATA-less	TAF1-depleted	2455	380438	380435	-3	YBR071W	3505.5	0.001195889	0.230204515	0.148190769	0.852948957	0.67356076	0.248924037	0.044938808	0.009632874	0.371812086	2	TRUE
256	258	orphan	chrII	-	TATA-less	TAF1-enriched	143	380948	380955	-7	orphan	133.8	0.084405443	NA	NA	NA	NA	NA	NA	NA	NA	NA	NA
257	259	CUT023	chrII	+	TATA-less	TAF1-enriched	7	381489	381213	-276	CUT023	46.6	0.099574953	NA	NA	NA	NA	NA	NA	NA	NA	NA	NA
258	260	YBR073W	chrII	+	TATA-containing	TAF1-enriched	1185	383177	383137	-40	YBR073W	546.3	0.001012921	0.189854027	0.00516077	1	1	1	1	1	1	1	TRUE
259	261	YBR074W	chrII	+	TATA-less	TAF1-enriched	430	NA	386281	NA	YBR074W	1610.9	0.000431283	0.078300979	0.096719054	0.013341345	1	0.024132671	1	1	1	2	TRUE
260	262	YBR076C-A	chrII	-	TATA-containing	TAF1-enriched	1216	391635	391670	-35	YBR076C-A	147.3	0.003946253	0.412413231	0.028834289	0.027584401	0.094708624	0.030979412	0.993366654	0.613943822	0.283506624	3	TRUE
261	263	orphan	chrII	-	TATA-less	TAF1-enriched	24	391881	392003	-122	orphan	93.2	0.079869532	NA	NA	NA	NA	NA	NA	NA	NA	NA	NA
262	264	YBR077C	chrII	-	TATA-less	TAF1-depleted	23	392279	392337	-58	YBR077C	202.5	0.000319146	0.177973138	0.05698828	0.199449824	0.235272367	0.044589318	0.235272367	0.290959187	0.235272367	1	TRUE
263	265	YBR078W	chrII	+	TATA-less	TAF1-depleted	4352	NA	392947	NA	YBR078W	5145.8	0.000140632	1	0.000425222	1	1	1	1	1	1	1	TRUE
264	266	orphan	chrII	-	TATA-less	TAF1-enriched	2	393180	393296	-116	orphan	3.5	0.1036667	NA	NA	NA	NA	NA	NA	NA	NA	NA	NA
265	267	orphan	chrII	+	TATA-less	TAF1-enriched	336	393633	393552	-81	orphan	152.3	0.468798473	NA	NA	NA	NA	NA	NA	NA	NA	NA	NA
266	268	YBR079C	chrII	-	TATA-less	TAF1-enriched	58032	398256	398302	-46	YBR079C	959.2	0.044021876	0.023855692	1	0.207651284	1	0.059005215	1	1	0.115241985	1	TRUE
267	269	YBR080C	chrII	-	TATA-less	TAF1-enriched	4226	400870	400916	-46	YBR080C	385.2	0.00022471	0.018174959	0.191778882	0.095267494	0.864830141	0.012234213	0.864830141	0.826054539	0.233417279	2	TRUE
268	270	YBR081C	chrII	-	TATA-less	TAF1-enriched	14	405344	405397	-53	YBR081C	91.7	0.011332866	1	0.008094258	1	1	1	0.053124445	1	1	1	TRUE
269	271	YBR082C	chrII	-	TATA-less	TAF1-enriched	28186	407136	407246	-110	YBR082C	5697.4	0.005470053	0.319520197	0.162535826	0.072107878	0.024186809	0.508059386	0.251208616	0.394788244	0.062386587	1	TRUE
270	272	orphan	chrII	+	TATA-less	TAF1-enriched	10	NA	407639	NA	orphan	81.3	0.003929913	0.070140571	0.917240819	0.010433477	0.207584765	0.00791647	0.678392416	0.372284902	0.366796342	2	TRUE
271	273	orphan	chrII	+	TATA-less	TAF1-depleted	7	408312	408152	-160	orphan	22.4	0.349818582	NA	NA	NA	NA	NA	NA	NA	NA	NA	NA
272	274	CUT453	chrII	-	TATA-less	TAF1-enriched	104	408312	408393	-81	CUT453	28.4	0.012440457	0.639353814	0.780833723	0.24809508	0.04325595	0.395831518	0.289718395	0.23782469	0.480296109	1	TRUE
273	275	YBR083W	chrII	+	TATA-containing	TAF1-depleted	284	409137	408940	-197	YBR083W	46.9	0.421407348	NA	NA	NA	NA	NA	NA	NA	NA	NA	NA
274	276	YBR084W	chrII	+	TATA-less	TAF1-enriched	1028	411066	411016	-50	YBR084W	988	0.000161114	0.337631778	0.100227544	0.011957615	1	0.00063951	1	1	1	2	TRUE
275	277	YBR084C-A	chrII	-	TATA-less	TAF1-enriched	1960	415212	415311	-99	YBR084C-A	5325	0.000187295	0.016859358	1	0.008848528	0.008848528	1	0.410648269	0.00072583	1	4	TRUE
276	278	YBR085W	chrII	+	TATA-less	TAF1-depleted	93	415919	415908	-11	YBR085W	246.8	0.001448771	0.017955293	0.988049657	0.111486999	0.366832544	0.014004893	0.144212184	0.750687215	0.104298943	2	TRUE
277	279	YBR085C-A	chrII	-	TATA-containing	TAF1-enriched	8770	419058	419193	-135	YBR085C-A	1916.1	0.001159581	0.211068552	0.84652803	0.260437943	0.260437943	0.00158679	0.524730057	0.569696615	0.012583082	2	TRUE
278	280	orphan	chrII	+	TATA-less	TAF1-enriched	201	419491	419476	-15	orphan	75.7	0.00134939	0.360301256	0.024915269	0.130728128	0.692110537	0.005342051	0.610658823	0.093008589	0.130728128	2	TRUE
279	281	YBR086C	chrII	-	TATA-less	TAF1-depleted	889	423106	423269	-163	YBR086C	4315	0.000270118	0.111731818	0.067750372	1	0.018975531	1	0.022785569	0.032525093	1	3	TRUE
280	282	CUT024	chrII	+	TATA-less	TAF1-enriched	16	423600	423586	-14	CUT024	186.9	0.0017858	0.042944086	0.366457731	0.965985773	0.352564329	0.230083777	0.398479458	0.06595177	0.352564329	1	TRUE
281	283	YBR087W	chrII	+	TATA-less	TAF1-enriched	351	423805	423754	-51	YBR087W	1002.2	0.001990517	0.022443553	1	1	1	0.000412661	1	1	0.248439107	2	TRUE
282	284	YBR088C	chrII	-	TATA-containing	TAF1-depleted	2133	425824	425812	12	YBR088C	593.3	0.000157011	0.005951226	1	0.019540543	1	0.002573666	1	1	0.019540543	4	TRUE
283	285	orphan	chrII	+	TATA-containing	TAF1-enriched	1	NA	426122	NA	orphan	11	0.036055352	0.69472107	0.244897031	0.987296017	0.019250466	0.43472302	0.094546168	0.034235469	0.271912005	2	TRUE
284	286	orphan	chrII	+	TATA-less	TAF1-enriched	152	426829	426690	-139	orphan	1	0.08641267	NA	NA	NA	NA	NA	NA	NA	NA	NA	NA
285	287	YBR090C	chrII	-	TATA-less	TAF1-enriched	689	426829	426912	-83	YBR090C	1043.5	0.001436166	0.171921748	0.220068989	0.702007459	0.111842583	0.621341498	0.027655087	0.006272415	0.702007459	2	TRUE
286	288	orphan	chrII	+	TATA-containing	TAF1-enriched	186	427187	427132	-55	orphan	18.7	0.00114889	0.078943668	0.305444267	0.093748838	0.754481037	0.015861261	0.427271701	0.569099619	0.093748838	1	TRUE
287	289	YBR091C	chrII	-	TATA-less	TAF1-enriched	185	427758	427773	-15	YBR091C	40.6	0.320028776	NA	NA	NA	NA	NA	NA	NA	NA	NA	NA
288	290	YBR092C	chrII	-	TATA-containing	TAF1-depleted	5564	428988	429115	-127	YBR092C	2034.6	0.000344987	0.229576763	0.040242044	0.083019374	0.368751076	0.0079954	0.48005632	0.561791386	0.157825165	2	TRUE
289	291	CUT025	chrII	+	TATA-less	TAF1-enriched	54	429611	429582	-29	CUT025	74.4	NA	NA	NA	NA	NA	NA	NA	NA	NA	NA	NA
290	292	YBR093C	chrII	-	TATA-containing	TAF1-depleted	1264	430895	430986	-91	YBR093C	4984.7	0.000293564	0.011237219	0.672631625	0.016780312	1	0.002019188	1	1	1	3	TRUE
291	293	orphan	chrII	+	TATA-less	TAF1-enriched	52	431656	431498	-158	orphan	46.7	0.016366799	0.164208717	0.929991039	0.286117643	0.133675511	0.569039385	0.446112372	0.449746467	0.133675511	0	FALSE
292	294	YBR095C	chrII	-	TATA-less	TAF1-enriched	260	435699	435727	-28	YBR095C	804.4	0.005163334	0.014958561	1	0.065564037	0.409801823	0.017443316	0.409801823	0.428122097	0.958041678	2	TRUE
293	295	YBR096W	chrII	+	TATA-less	TAF1-enriched	168	435992	435939	-53	YBR096W	490.1	0.000224986	0.066467569	0.314208074	0.230229076	0.091764639	0.121406942	0.041067301	0.137252132	0.230229076	1	TRUE
294	296	YBR097W	chrII	+	TATA-less	TAF1-enriched	189	436952	436920	-32	YBR097W	299.1	0.007115401	1	0.00400354	0.127574038	0.563284514	0.049167304	0.986026376	0.963930707	0.127574038	2	TRUE
295	297	YBR101C	chrII	-	TATA-less	TAF1-enriched	792	444698	444755	-57	YBR101C	3526.5	0.011014667	1	0.007581723	1	1	1	0.060892662	1	1	1	TRUE
296	298	orphan	chrII	+	TATA-less	TAF1-depleted	15	445185	445030	-155	orphan	201.1	0.061357942	NA	NA	NA	NA	NA	NA	NA	NA	NA	NA
297	299	YBR102C	chrII	-	TATA-less	TAF1-depleted	223	447336	447401	-65	YBR102C	407.8	0.005753234	0.358887487	0.046538048	0.911833165	0.739753533	0.057131935	0.911833165	0.206038161	0.739753533	1	TRUE
298	300	YBR103W	chrII	+	TATA-less	TAF1-enriched	203	447597	447549	-48	YBR103W	376.7	0.00110651	0.005205549	0.162408916	0.788844101	0.788844101	0.729535346	0.788844101	0.804939351	0.788844101	1	TRUE
299	301	orphan	chrII	-	TATA-less	TAF1-enriched	30	449266	449306	-40	orphan	8.1	0.278844685	NA	NA	NA	NA	NA	NA	NA	NA	NA	NA
300	302	YBR104W	chrII	+	TATA-less	TAF1-depleted	199	NA	449576	NA	YBR104W	823.6	0.013649986	0.084261055	0.105131724	0.41152844	0.198538027	0.73990925	0.87476778	0.195055552	0.198538027	0	FALSE
301	303	YBR105C	chrII	-	TATA-containing	TAF1-depleted	4665	451889	451998	-109	YBR105C	4488.2	0.000902253	0.139018183	0.110084446	0.351397591	0.125639062	0.073632626	0.125639062	0.457629869	0.351397591	0	FALSE
302	304	YBR106W	chrII	+	TATA-less	TAF1-enriched	85013	452665	452619	-46	YBR106W	12657.8	0.001203224	0.77803307	0.005284493	0.03193198	0.696501448	0.029106126	0.454706909	0.529063399	0.013499955	4	TRUE
303	305	YBR107C	chrII	-	TATA-less	TAF1-enriched	108	454539	454573	-34	YBR107C	216.9	0.005143449	0.004680685	1	0.044568876	0.117323876	0.912502744	0.173251214	0.929951534	0.453852944	2	TRUE
304	306	YBR108W	chrII	+	TATA-less	TAF1-enriched	135	454828	454776	-52	YBR108W	782.9	0.000289098	0.030829714	1	0.010855843	1	0.000604705	0.423373877	1	0.068834611	3	TRUE
305	307	YBR109C	chrII	-	TATA-less	TAF1-enriched	1280	458381	458409	-28	YBR109C	2312.7	0.005219666	0.465376397	0.02851933	0.548656375	0.548656375	0.438749945	0.870065784	0.020183582	0.548656375	2	TRUE
306	308	YBR110W	chrII	+	TATA-less	TAF1-enriched	138	458852	458718	-134	YBR110W	327	0.040080597	0.010600187	0.176617914	0.053518847	0.72336615	0.129445239	0.198045348	0.454604322	0.367589226	1	TRUE
307	309	YBR111C	chrII	-	TATA-containing	TAF1-depleted	2304	461707	461865	-158	YBR111C	5565.7	0.000623703	0.048243653	1	0.003914292	1	1	0.008935296	1	1	3	TRUE
308	310	YBR111W-A	chrII	+	TATA-less	TAF1-enriched	768	462139	462120	-19	YBR111W-A	1682.3	0.001069628	0.133644958	0.048788734	0.211889342	0.840422756	0.059835489	0.729097178	0.284180859	0.211889342	1	TRUE
309	311	YBR112C	chrII	-	TATA-less	TAF1-enriched	5587	465906	465945	-39	YBR112C	4334.1	0.001424197	0.189469335	0.01481578	0.537878792	0.758073266	0.426448699	0.217931281	0.32017215	0.537878792	1	TRUE
310	312	YBR114W	chrII	+	TATA-containing	TAF1-enriched	1310	467222	467160	-62	YBR114W	600.8	0.000501055	0.066413354	0.296297361	0.078497418	0.801541122	0.023118648	0.108833254	0.745562958	0.078497418	1	TRUE
311	313	YBR115C	chrII	-	TATA-containing	TAF1-depleted	24559	473844	473973	-129	YBR115C	5821.4	0.000219364	0.941185979	0.460640097	0.130697657	0.047690111	0.074389671	0.029698354	0.730604832	0.210304489	2	TRUE
312	314	ST0169	chrII	+	TATA-containing	TAF1-enriched	231	474364	474344	-20	ST0169	99.4	0.00580016	0.193810361	0.068434941	0.185090409	0.334394168	0.123096443	0.780906795	0.459743069	0.589256336	0	FALSE
313	315	orphan	chrII	+	TATA-less	TAF1-enriched	9	477203	477193	-10	orphan	0.7	0.932287059	NA	NA	NA	NA	NA	NA	NA	NA	NA	NA
314	316	YBR118W	chrII	+	TATA-containing	TAF1-depleted	15587	477692	477649	-43	YBR118W	361033	0.000814989	0.000985929	1	1	1	0.318091373	1	1	1	1	TRUE
315	317	YBR119W	chrII	+	TATA-less	TAF1-enriched	913	479334	479298	-36	YBR119W	420.7	0.000914498	0.075156957	0.349791233	0.059663691	0.766192798	0.015045083	0.137069579	0.701061301	0.247519914	1	TRUE
316	318	YBR120C	chrII	-	TATA-less	TAF1-enriched	314	480946	480993	-47	YBR120C	70.5	0.000425772	0.170417597	0.165557583	0.024837057	0.704137236	0.006555339	0.704137236	0.623961037	0.08432975	2	TRUE
317	319	YBR121C	chrII	-	TATA-less	TAF1-enriched	2120	483297	483434	-137	YBR121C	7702.7	0.000196989	0.052638632	0.229447945	0.081099045	0.188010847	0.061548521	0.056274316	0.670913838	0.323463842	0	FALSE
318	320	YBR122C	chrII	-	TATA-less	TAF1-enriched	282	484499	484536	-37	YBR122C	557.3	0.000304545	0.029027101	0.672631625	0.005482777	1	0.000848774	1	1	1	3	TRUE
319	321	YBR123C	chrII	-	TATA-less	TAF1-enriched	788	486696	486728	-32	YBR123C	183.1	0.000397444	0.043680119	0.021149136	1	0.304929171	1	0.304929171	1	1	2	TRUE
320	322	YBR125C	chrII	-	TATA-containing	TAF1-depleted	381	488948	488958	-10	YBR125C	106.6	0.637919409	NA	NA	NA	NA	NA	NA	NA	NA	NA	NA
321	323	YBR126C	chrII	-	TATA-containing	TAF1-depleted	2955	490316	490463	-147	YBR126C	5934.2	0.000258152	0.072816908	0.141433801	0.306368376	0.47348776	0.051848349	0.127952258	0.131635765	0.306368376	0	FALSE
322	324	YBR126W-A	chrII	+	TATA-less	TAF1-enriched	18563	490845	490827	-18	YBR126W-A	6583.7	0.007132975	0.00865541	1	0.249987069	1	0.063393856	1	0.490491649	0.285425465	1	TRUE
323	325	YBR127C	chrII	-	TATA-less	TAF1-enriched	4233	492820	492880	-60	YBR127C	28451.9	0.000409285	0.315246629	0.013096028	0.237595342	0.308091313	0.034901409	0.308091313	0.691487875	0.237595342	2	TRUE
324	326	CUT027	chrII	+	TATA-less	TAF1-enriched	233	493283	493130	-153	CUT027	85.2	0.284515078	NA	NA	NA	NA	NA	NA	NA	NA	NA	NA
325	327	YBR131W	chrII	+	TATA-less	TAF1-enriched	136	497169	497148	-21	YBR131W	153.3	0.001214392	0.008017362	0.388421584	0.674549356	0.058810624	1	0.086410733	1	1	1	TRUE
326	328	YBR132C	chrII	-	TATA-containing	TAF1-depleted	10754	501601	501594	7	YBR132C	382.3	0.000202094	0.122822648	0.174505103	0.090968948	1	0.029096332	0.136890328	0.149800054	0.090968948	1	TRUE
327	329	YBR133C	chrII	-	TATA-containing	TAF1-enriched	514	504396	504416	-20	YBR133C	392.1	0.001121033	0.237999362	0.107889303	0.019135152	0.467162851	0.005186791	0.935609578	0.616629777	0.132921694	2	TRUE
328	330	YBR135W	chrII	+	TATA-containing	TAF1-enriched	535	504800	504760	-40	YBR135W	1258	0.000495893	0.027723176	0.117516183	0.411293695	1	0.044843725	1	1	0.049444174	3	TRUE
329	331	YBR136W	chrII	+	TATA-less	TAF1-enriched	506	505690	505650	-40	YBR136W	468.6	0.00099573	0.008286527	0.504479716	0.757539505	0.157484469	0.450163563	0.18814242	0.093328719	0.757539505	1	TRUE
330	332	YBR137W	chrII	+	TATA-less	TAF1-depleted	154	513115	512982	-133	YBR137W	228.6	0.001426592	0.455038399	0.052926873	0.306341438	0.780259694	0.006663211	0.780259694	0.718725663	0.780259694	1	TRUE
331	333	YBR138C	chrII	-	TATA-less	TAF1-enriched	90	515358	515405	-47	YBR138C	352.6	0.003434784	0.043985314	0.517692639	0.132097519	0.163576858	0.028264661	0.434728477	0.908954051	0.262992858	2	TRUE
332	334	YBR139W	chrII	+	TATA-containing	TAF1-depleted	4465	515681	515650	-31	YBR139W	1040.9	0.001479744	0.24314547	0.085427656	0.043510116	0.567330377	0.00336773	0.567330377	0.93077131	0.130004329	2	TRUE
333	335	YBR141W-A	chrII	+	TATA-less	TAF1-enriched	0	527056	526947	-109	YBR141W-A	0.6	0.691705126	NA	NA	NA	NA	NA	NA	NA	NA	NA	NA
334	336	YBR142W	chrII	+	TATA-less	TAF1-enriched	490	528296	528242	-54	YBR142W	1043.8	0.001051094	0.001683846	1	1	1	0.064192698	1	1	1	1	TRUE
335	337	YBR143C	chrII	-	TATA-less	TAF1-enriched	929	NA	532218	NA	YBR143C	990.4	0.000796742	0.090776449	0.026985946	0.243261908	0.675472767	0.588870621	0.114884407	0.972479798	0.675472767	1	TRUE
336	338	ST0182	chrII	+	TATA-less	TAF1-enriched	35	532516	532507	-9	ST0182	68	0.002557712	0.335969005	0.054314369	0.476807942	0.279989099	0.358371416	0.731938495	0.027026274	0.476807942	1	TRUE
337	339	orphan	chrII	-	TATA-less	TAF1-enriched	340	533196	533274	-78	orphan	117.3	0.00433696	0.02205578	0.684249803	0.011589005	0.75390856	0.009358096	0.418817926	0.550894648	0.75390856	3	TRUE
338	340	YBR145W	chrII	+	TATA-containing	TAF1-depleted	152	533720	533706	-14	YBR145W	688.6	0.003897199	0.038089262	0.418970709	0.116359413	0.738309004	0.042644987	0.38504237	0.154639812	0.116359413	2	TRUE
339	341	YBR146W	chrII	+	TATA-less	TAF1-enriched	294	535244	535232	-12	YBR146W	1861.9	0.000438816	0.151958672	0.08343118	0.055787787	0.523758034	0.013538834	0.351427907	0.899233787	0.128424766	1	TRUE
340	342	CUT455	chrII	-	TATA-less	TAF1-enriched	157	539685	539706	-21	CUT455	13.2	0.051699877	NA	NA	NA	NA	NA	NA	NA	NA	NA	NA
341	343	YBR149W	chrII	+	TATA-containing	TAF1-depleted	2304	539961	539922	-39	YBR149W	2328	0.004302609	0.003360764	0.277885079	0.060196783	0.784801037	0.013598278	0.961566055	0.917419303	0.044659015	3	TRUE
342	344	YBR150C	chrII	-	TATA-less	TAF1-enriched	269	544473	544509	-36	YBR150C	120.3	0.001123869	0.008073589	0.79346217	0.161426082	0.826398645	0.038533655	0.427815065	0.305988298	0.108991374	2	TRUE
343	345	YBR151W	chrII	+	TATA-less	TAF1-enriched	63	544942	544909	-33	YBR151W	2615.7	0.004821048	0.549285788	0.01002482	0.81840637	0.158430384	0.149956073	0.309258786	0.611365895	0.81840637	1	TRUE
344	346	YBR152W	chrII	+	TATA-less	TAF1-enriched	128	546581	546396	-185	YBR152W	92.8	0.000947435	0.157982475	0.100015479	0.264363322	0.278254958	0.006584139	0.389226871	0.27527828	0.678460138	1	TRUE
345	347	YBR153W	chrII	+	TATA-less	TAF1-enriched	166	547574	547407	-167	YBR153W	114.4	0.008562185	0.035319718	0.279073213	0.520703324	0.96059675	0.064363127	0.96059675	0.565946679	0.216786399	1	TRUE
346	348	YBR154C	chrII	-	TATA-containing	TAF1-depleted	537	549071	549122	-51	YBR154C	19017.2	0.00054142	0.004140611	1	0.019417261	1	0.002547861	1	0.278165546	0.242520122	3	TRUE
347	349	CUT456	chrII	-	TATA-less	TAF1-enriched	54	549491	549532	-41	CUT456	57.6	0.585208769	NA	NA	NA	NA	NA	NA	NA	NA	NA	NA
348	350	YBR156C	chrII	-	TATA-less	TAF1-enriched	95	553195	553241	-46	YBR156C	206.5	0.002320213	0.00345151	1	1	1	0.030739091	1	1	1	2	TRUE
349	351	YBR157C	chrII	-	TATA-containing	TAF1-depleted	334	554285	554392	-107	YBR157C	132.6	0.000452427	0.073154684	0.154249983	0.088108469	0.923095255	0.088524395	0.114853747	0.382996827	0.114853747	0	FALSE
350	352	orphan	chrII	-	TATA-less	TAF1-enriched	142	554518	554622	-104	orphan	21.4	0.03456406	0.014737453	0.061120196	0.047726137	0.583266974	0.504641043	0.344062434	0.544769067	0.223793406	2	TRUE
351	353	orphan	chrII	-	TATA-less	TAF1-enriched	188	555131	555145	-14	orphan	420.3	0.00307341	0.84677179	0.84677179	0.21589046	0.002456155	0.239111124	0.453838406	0.768526488	0.361840283	1	TRUE
352	354	orphan	chrII	+	TATA-less	TAF1-enriched	70	NA	555479	NA	orphan	96.3	0.017867813	0.93044393	0.221704439	0.774225563	0.307767067	0.343952368	0.264620813	0.108551167	0.006745405	1	TRUE
353	355	YBR158W	chrII	+	TATA-containing	TAF1-depleted	618	556603	556286	-317	YBR158W	1271.5	0.000887707	0.001862846	1	0.049726222	1	1	1	1	1	2	TRUE
354	356	YBR159W	chrII	+	TATA-less	TAF1-enriched	400	558696	558644	-52	YBR159W	1145.2	0.002942294	0.01008621	0.671737117	0.153928317	0.973548623	0.065667017	0.119132749	0.184505709	0.153928317	1	TRUE
355	357	YBR160W	chrII	+	TATA-less	TAF1-enriched	443	560061	560000	-61	YBR160W	2902.5	0.002130536	0.061469613	0.103028476	0.446264804	0.289455926	0.116180027	0.289455926	0.777517224	0.826753711	0	FALSE
356	358	YBR161W	chrII	+	TATA-less	TAF1-enriched	394	561398	561365	-33	YBR161W	172	0.120672821	NA	NA	NA	NA	NA	NA	NA	NA	NA	NA
357	359	YBR162C	chrII	-	TATA-less	TAF1-depleted	29955	564669	564802	-133	YBR162C	2877.9	0.000961061	0.006098946	1	0.011412036	1	0.012401086	1	1	0.304072034	3	TRUE
358	360	YBR162W-A	chrII	+	TATA-less	TAF1-enriched	9195	565246	565178	-68	YBR162W-A	8012.6	0.000624289	0.125506853	0.125506853	0.19051164	0.440106195	0.091028281	0.10002648	0.318926823	0.19051164	0	FALSE
359	361	YBR163W	chrII	+	TATA-less	TAF1-enriched	279	565668	565659	-9	YBR163W	464.1	0.003726688	0.008374776	0.418544454	0.96073515	0.96073515	0.340409931	0.218406361	0.243933029	0.565722524	1	TRUE
360	362	YBR164C	chrII	-	TATA-containing	TAF1-depleted	118	568503	568561	-58	YBR164C	805	0.000205492	0.19759583	0.230706531	0.07496653	0.133182297	0.035018259	0.133182297	0.052544224	0.465194305	1	TRUE
361	363	YBR165W	chrII	+	TATA-less	TAF1-enriched	47	568796	568761	-35	YBR165W	185.9	0.0004105	0.091823835	0.302895295	0.064781782	0.451820091	0.01711824	0.132383669	0.627206926	0.064781782	1	TRUE
362	364	YBR168W	chrII	+	TATA-less	TAF1-enriched	109	NA	572067	NA	YBR168W	109.6	0.008247909	0.124184296	0.031871589	0.778942175	0.399735629	0.717068578	0.574527846	0.856218704	0.673720951	1	TRUE
363	365	CUT029	chrII	+	TATA-less	TAF1-enriched	2738	576569	576368	-201	CUT029	22	0.043079491	0.189409455	0.165980556	0.35838015	0.221728088	0.502736349	0.892001712	0.749249343	0.187575701	0	FALSE
364	366	YBR172C	chrII	-	TATA-less	TAF1-enriched	4637	581443	581483	-40	YBR172C	297.4	0.001676506	0.018521776	0.11641222	1	1	0.112750187	1	1	1	1	TRUE
365	367	YBR173C	chrII	-	TATA-less	TAF1-enriched	8799	582159	582200	-41	YBR173C	8782.6	0.000482546	1	0.017681546	0.439778214	0.067839821	0.318579744	0.02461001	0.018401164	0.439778214	3	TRUE
366	368	YBR175W	chrII	+	TATA-less	TAF1-enriched	682	582434	582408	-26	YBR175W	691.8	0.00015061	0.016754571	0.166091944	0.129254042	1	0.011175845	1	1	0.084722189	2	TRUE
367	369	YBR176W	chrII	+	TATA-less	TAF1-enriched	2103	583643	583634	-9	YBR176W	132.2	0.000916448	0.025330543	0.266631264	0.070403235	0.59723433	0.024251419	0.378514638	0.495151669	0.229802467	2	TRUE
368	370	YBR179C	chrII	-	TATA-less	TAF1-enriched	1092	589156	589179	-23	YBR179C	1038.4	0.000933205	0.039281832	0.219853386	0.33319651	0.370245142	0.012469241	0.370245142	1	1	2	TRUE
369	371	YBR181C	chrII	-	TATA-less	TAF1-enriched	24358	592756	592803	-47	YBR181C	8781.4	0.000565382	0.067993352	0.37799728	0.04558206	0.476715609	0.009851124	0.476715609	0.358270726	0.04558206	3	TRUE
370	372	YBR183W	chrII	+	TATA-less	TAF1-depleted	32	596165	595979	-186	YBR183W	1151.7	0.00333807	0.109729517	0.6367792	0.171224427	0.141996111	0.009736854	0.570486168	0.354287531	0.333140341	1	TRUE
371	373	YBR185C	chrII	-	TATA-less	TAF1-enriched	794	599957	599982	-25	YBR185C	209	0.000331635	0.052459077	0.176482116	0.209349601	0.439802545	0.129324975	0.166324677	0.050807745	0.675616705	0	FALSE
372	374	ST3857	chrII	-	TATA-less	TAF1-enriched	28	602217	602309	-92	ST3857	101.8	0.029149796	0.125976674	0.241181456	0.823613304	0.118688934	0.773528379	0.340077478	0.054573686	0.340077478	0	FALSE
373	375	YBR187W	chrII	+	TATA-less	TAF1-depleted	482	602558	602520	-38	YBR187W	1555.7	0.000775442	0.27618891	0.077426529	0.283740022	0.158401611	0.098041555	0.062628828	0.21563594	0.600356425	0	FALSE
374	376	YBR189W	chrII	+	TATA-less	TAF1-enriched	10683	604525	604482	-43	YBR189W	53307	0.000133552	0.000414279	1	1	1	1	1	1	1	1	TRUE
375	377	YBR191W	chrII	+	TATA-less	TAF1-enriched	11552	606277	606203	-74	YBR191W	19524.8	0.003863245	0.004349713	1	0.192420129	1	0.042264532	1	1	1	2	TRUE
376	378	YBR192W	chrII	+	TATA-less	TAF1-enriched	201	607521	607489	-32	YBR192W	239.1	0.001873142	0.601463468	0.014309705	0.040185163	0.323906556	1	1	0.153770599	1	2	TRUE
377	379	orphan	chrII	+	TATA-less	TAF1-enriched	18	609566	609421	-145	orphan	9.1	0.023270561	0.086629914	0.77326859	0.016760677	0.090213257	0.013516058	0.947025844	0.606791758	0.527909721	2	TRUE
378	380	YBR193C	chrII	-	TATA-less	TAF1-depleted	411	609725	609760	-35	YBR193C	566.5	0.217083913	NA	NA	NA	NA	NA	NA	NA	NA	NA	NA
379	381	YBR195C	chrII	-	TATA-less	TAF1-enriched	78	611861	611875	-14	YBR195C	761.2	0.000554022	0.403153231	0.029955795	0.499805007	0.421784442	0.04422398	0.187684477	0.708885208	0.022521528	3	TRUE
380	382	YBR196C	chrII	-	TATA-containing	TAF1-depleted	5647	613901	613973	-72	YBR196C	24915.9	0.000465738	0.061877291	0.478797212	0.040816754	1	0.001438014	0.437845638	1	0.040816754	3	TRUE
381	383	CUT030	chrII	+	TATA-less	TAF1-enriched	1139	614716	614520	-196	CUT030	231.2	0.003658717	0.033275805	0.224682803	0.093831097	0.849302791	0.002806327	0.849302791	0.806224625	0.003918263	3	TRUE
382	384	orphan	chrII	-	TATA-less	TAF1-enriched	45	614716	614937	-221	orphan	90.5	0.003916159	0.100061574	0.350615447	0.276858333	0.188636748	0.089664418	0.465178762	0.785325698	0.684927963	0	FALSE
383	385	ANT027	chrII	+	TATA-less	TAF1-enriched	110	615386	615406	20	ANT027	67.6	0.059508982	NA	NA	NA	NA	NA	NA	NA	NA	NA	NA
384	386	YBR197C	chrII	-	TATA-less	TAF1-enriched	196	615823	615867	-44	YBR197C	607.6	0.001810189	0.001997427	0.218720146	0.060906901	0.060906901	0.015539982	0.78890048	0.729606412	0.060906901	2	TRUE
385	387	YBR198C	chrII	-	TATA-less	TAF1-depleted	263	618530	618601	-71	YBR198C	707.7	0.001020313	0.441085921	0.015115522	0.626358664	0.34657183	0.010587454	0.34657183	0.80149512	0.974107425	2	TRUE
386	388	YBR199W	chrII	+	TATA-less	TAF1-enriched	2267	618866	618816	-50	YBR199W	3392.8	0.000186586	0.085006094	0.085006094	0.362379647	0.536529166	0.039608705	0.216406494	0.147375619	0.268717827	1	TRUE
387	389	YBR200W	chrII	+	TATA-less	TAF1-enriched	342	620870	620809	-61	YBR200W	694.9	0.001299512	0.011424334	1	0.035309294	0.505363887	0.006582157	0.505363887	0.774393684	0.964581636	3	TRUE
388	390	YBR201W	chrII	+	TATA-less	TAF1-enriched	367	623478	623440	-38	YBR201W	1207.3	0.000994063	0.158756118	0.039316004	0.335655703	0.273261606	0.062262174	0.273261606	0.637309736	0.714966519	1	TRUE
389	391	YBR201C-A	chrII	-	TATA-containing	TAF1-enriched	223	624644	624765	-121	YBR201C-A	1024.1	0.006511323	0.016668974	0.324753388	0.009219139	1	0.036712932	0.053080473	1	1	3	TRUE
390	392	orphan	chrII	-	TATA-less	TAF1-enriched	95	624964	625063	-99	orphan	37.6	0.127090827	NA	NA	NA	NA	NA	NA	NA	NA	NA	NA
391	393	CUT031	chrII	+	TATA-less	TAF1-enriched	14	625366	625338	-28	CUT031	10.3	0.44888468	NA	NA	NA	NA	NA	NA	NA	NA	NA	NA
392	394	YBR202W	chrII	+	TATA-less	TAF1-depleted	717	625739	625707	-32	YBR202W	2562.4	0.010710239	0.150526045	0.060411169	0.766236255	0.766236255	0.258182463	0.955145637	0.958634785	0.132947799	0	FALSE
393	395	YBR205W	chrII	+	TATA-less	TAF1-enriched	217	633639	633577	-62	YBR205W	2071.4	0.000233298	0.105656384	0.055848508	0.397581938	0.716941813	0.042538693	0.223774215	0.186522179	0.242720677	1	TRUE
394	396	orphan	chrII	-	TATA-less	TAF1-enriched	18	634978	635032	-54	orphan	2.9	0.024567797	0.421305631	0.053227263	0.895600235	0.79298021	0.803380166	0.052927204	0.25381369	0.212543287	0	FALSE
395	397	YBR207W	chrII	+	TATA-less	TAF1-enriched	442	635125	635061	-64	YBR207W	201.4	0.016774848	0.976556455	0.018727644	0.083581382	0.955075341	0.224141711	0.306748403	0.131939229	0.903915375	1	TRUE
396	398	YBR208C	chrII	-	TATA-less	TAF1-depleted	101	642436	642596	-160	YBR208C	151.9	0.026713381	0.343467197	0.517894132	0.044471248	0.017691495	0.006918567	0.531349228	0.088895542	0.037939211	4	TRUE
397	399	YBR209W	chrII	+	TATA-less	TAF1-enriched	3	642779	642745	-34	YBR209W	1.3	0.946895637	NA	NA	NA	NA	NA	NA	NA	NA	NA	NA
398	400	tC(GCA)B	chrII	-	TATA-less	-	427	643074	643088	-14	tC(GCA)B	14.4	0.272168891	NA	NA	NA	NA	NA	NA	NA	NA	NA	NA
399	401	YBR210W	chrII	+	TATA-less	TAF1-enriched	320	645553	645516	-37	YBR210W	1745.7	0.006918459	0.019261658	0.47292303	0.638332236	0.148660286	0.095720324	0.638332236	0.543977968	0.248617183	1	TRUE
400	402	YBR211C	chrII	-	TATA-less	TAF1-enriched	281	647230	647229	1	YBR211C	269.1	0.000660348	0.267319436	0.036147641	0.679253728	0.059868113	0.59347813	0.149029839	0.083249547	0.059868113	1	TRUE
401	403	YBR212W	chrII	+	TATA-less	TAF1-enriched	763	NA	647480	NA	YBR212W	538.7	0.010717076	0.023877564	1	1	1	1	1	0.039080842	1	2	TRUE
402	404	YBR214W	chrII	+	TATA-less	TAF1-enriched	9974	651359	651352	-7	YBR214W	1259.6	0.585208769	NA	NA	NA	NA	NA	NA	NA	NA	NA	NA
403	405	YBR215W	chrII	+	TATA-less	TAF1-depleted	100	653354	653315	-39	YBR215W	89.3	0.003937052	0.024606624	0.193190857	0.884096194	0.131970024	0.586656924	0.224434212	0.391250116	0.833223569	1	TRUE
404	406	YBR217W	chrII	+	TATA-less	TAF1-enriched	843	657811	657785	-26	YBR217W	178.4	0.004932878	0.196964448	0.191622792	0.633498585	0.152595046	0.019789098	0.633498585	0.322522269	0.633498585	1	TRUE
405	407	YBR218C	chrII	-	TATA-less	TAF1-depleted	4976	662203	662396	-193	YBR218C	2136.5	0.00310669	0.112974303	0.262101703	0.279672029	0.359006428	0.01416943	0.359006428	0.687849976	0.359006428	1	TRUE
406	408	CUT033	chrII	+	TATA-less	TAF1-enriched	2	662944	662845	-99	CUT033	11.4	0.01839346	0.449639545	0.315776334	0.444588139	0.503552966	0.607235784	0.655640644	0.048398913	0.278809776	1	TRUE
407	409	YBR220C	chrII	-	TATA-less	TAF1-enriched	324	664696	664744	-48	YBR220C	751.2	0.00165788	1	0.001683846	1	1	1	0.138488751	0.37101579	1	1	TRUE
408	410	YBR221C	chrII	-	TATA-less	TAF1-enriched	34554	666416	666456	-40	YBR221C	17937.7	0.000142449	0.00042799	1	1	1	1	1	1	1	1	TRUE
409	411	YBR222C	chrII	-	TATA-containing	TAF1-depleted	788	668364	668388	-24	YBR222C	375	0.000342649	0.086607328	0.178180599	0.179984407	0.460853799	0.004288809	1	0.341080191	0.179984407	1	TRUE
410	412	YBR228W	chrII	+	TATA-less	TAF1-enriched	215	675373	675313	-60	YBR228W	164.9	0.006087311	1	0.003020362	0.740430357	0.740430357	0.668880361	0.740430357	0.199472647	0.410584509	1	TRUE
411	413	YBR229C	chrII	-	TATA-less	TAF1-enriched	1454	679210	679230	-20	YBR229C	582.7	0.000141599	0.003036513	1	1	1	0.000935366	1	1	1	2	TRUE
412	414	YBR230C	chrII	-	TATA-containing	TAF1-enriched	9978	680061	680076	-15	YBR230C	629.6	0.000376474	0.051935633	0.231656482	0.15897279	0.123667345	0.069001412	0.251595871	0.290413285	0.071606127	0	FALSE
413	415	orphan	chrII	+	TATA-less	TAF1-enriched	42	680949	680940	-9	orphan	1.2	0.477744016	NA	NA	NA	NA	NA	NA	NA	NA	NA	NA
414	416	orphan	chrII	-	TATA-containing	TAF1-depleted	258364	681841	681862	-21	orphan	120524.9	NA	NA	NA	NA	NA	NA	NA	NA	NA	NA	NA
415	417	CUT034	chrII	+	TATA-less	TAF1-enriched	22	682256	682194	-62	CUT034	2.5	0.016190432	0.538786473	0.065190815	0.059136538	0.336680602	0.008644	0.810185951	0.501118276	0.336680602	1	TRUE
416	418	YBR231C	chrII	-	TATA-less	TAF1-enriched	175	683098	683144	-46	YBR231C	187.4	0.000613374	0.17991272	0.143485146	0.190050133	0.078212638	0.090691951	0.078212638	0.483671455	0.190050133	0	FALSE
417	419	YBR233W-A	chrII	+	TATA-less	TAF1-enriched	475	684985	684944	-41	YBR233W-A	694.6	0.000205053	0.121557236	0.158857064	0.089877336	1	0.02855436	0.396425408	0.02855436	1	2	TRUE
418	420	YBR234C	chrII	-	TATA-less	TAF1-enriched	1828	686567	686629	-62	YBR234C	1507	0.001734243	0.518961022	0.070941179	0.710700787	0.029817776	0.508440406	0.029817776	0.013791311	0.608499808	3	TRUE
419	421	YBR236C	chrII	-	TATA-less	TAF1-enriched	802	691698	691731	-33	YBR236C	341.3	0.000596252	0.02175175	0.444336034	0.093778596	1	0.001173844	1	1	0.274433767	2	TRUE
420	422	YBR237W	chrII	+	TATA-less	TAF1-enriched	83	691973	691932	-41	YBR237W	267.6	0.001378263	0.009195571	1	0.127923669	0.882433881	0.010793364	0.37961374	0.256677817	0.993059217	2	TRUE
421	423	YBR238C	chrII	-	TATA-less	TAF1-enriched	8079	697228	697302	-74	YBR238C	8780.1	0.000574079	0.14377493	0.055485003	0.120336248	0.471135537	0.02058586	0.987223175	0.649232	0.035919121	2	TRUE
422	424	ST0237	chrII	+	TATA-less	TAF1-enriched	58	697917	697874	-43	ST0237	128.7	0.012586495	0.137713293	0.119270291	0.358795004	0.326069769	0.429645113	0.110972593	0.677641449	0.488766186	0	FALSE
423	425	orphan	chrII	+	TATA-less	TAF1-enriched	39	697917	697901	-16	orphan	151.3	0.009144866	0.023177172	0.703308383	0.293237133	0.55807862	0.087438572	0.106815192	0.811699951	0.445935006	1	TRUE
424	426	YBR242W	chrII	+	TATA-containing	TAF1-enriched	3479	704553	704511	-42	YBR242W	1101.2	0.000461916	0.51900053	0.028335115	0.723924219	0.04049434	0.648387212	0.04049434	0.008173382	0.723924219	4	TRUE
425	427	YBR243C	chrII	-	TATA-less	TAF1-enriched	80	706771	706846	-75	YBR243C	673.1	0.015595482	0.80860809	0.0237754	0.777153542	0.339462629	0.049533014	0.777153542	0.664360035	0.339462629	2	TRUE
426	428	orphan	chrII	+	TATA-less	TAF1-enriched	440	707524	707449	-75	orphan	970.7	0.000551132	0.049001327	0.518644611	0.157338515	0.671402534	0.003490102	0.671402534	0.583918036	0.023664835	3	TRUE
427	429	YBR244W	chrII	+	TATA-containing	TAF1-depleted	1257	707524	707475	-49	YBR244W	977.1	0.000394913	0.009435828	1	0.152486883	0.685518639	0.003546033	0.685518639	0.601126999	0.023902805	3	TRUE
428	430	YBR246W	chrII	+	TATA-less	TAF1-depleted	87	711612	711548	-64	YBR246W	689.2	0.000234995	0.028717928	0.509768974	0.131075049	0.03566756	0.051266576	0.087856177	0.702926224	0.645855408	2	TRUE
429	431	YBR247C	chrII	-	TATA-less	TAF1-depleted	89	714449	714476	-27	YBR247C	1020	0.000176693	0.033168958	0.161592562	0.125193746	1	0.025239078	0.125193746	0.730646863	0.257074299	2	TRUE
430	432	CUT037	chrII	+	TATA-less	TAF1-enriched	133	714730	714714	-16	CUT037	31.1	0.119065889	NA	NA	NA	NA	NA	NA	NA	NA	NA	NA
431	433	YBR248C	chrII	-	TATA-less	TAF1-depleted	285	716497	716561	-64	YBR248C	500.3	0.031656206	0.056872219	0.587824924	0.647436981	0.647436981	0.514044631	0.475183953	0.008778313	0.547344354	1	TRUE
432	434	YBR249C	chrII	-	TATA-less	TAF1-enriched	2455	717939	718084	-145	YBR249C	6922.7	0.000319377	0.077543203	0.133522726	0.158565438	0.242720677	0.06873014	0.242720677	0.13151433	0.657682234	0	FALSE
433	435	orphan	chrII	+	TATA-less	TAF1-enriched	96	718452	718405	-47	orphan	26.9	0.146664595	NA	NA	NA	NA	NA	NA	NA	NA	NA	NA
434	436	YBR251W	chrII	+	TATA-less	TAF1-enriched	101	721378	721354	-24	YBR251W	657.7	0.000192889	0.048740882	0.181845961	0.045256689	0.875482334	0.00974051	0.875482334	0.839684455	0.045256689	4	TRUE
435	437	YBR252W	chrII	+	TATA-containing	TAF1-enriched	4425	722635	722593	-42	YBR252W	2705.2	0.00267936	0.048513816	0.548677324	0.203817962	0.528006382	0.100895039	0.197732705	0.09634246	0.203817962	1	TRUE
436	439	YBR255C-A	chrII	-	TATA-less	TAF1-enriched	8070	727067	727111	-44	YBR255C-A	277.1	0.237451181	NA	NA	NA	NA	NA	NA	NA	NA	NA	NA
437	440	YBR256C	chrII	-	TATA-containing	TAF1-enriched	765	728094	728110	-16	YBR256C	12755.6	0.01934621	0.097627237	0.34163743	0.534166858	0.207627046	0.422230909	0.207627046	0.0025697	0.391511333	1	TRUE
438	441	YBR257W	chrII	+	TATA-less	TAF1-enriched	480	728886	728854	-32	YBR257W	284.2	0.00132255	0.079110848	0.195735233	0.813266538	0.098229409	0.138555678	0.098229409	0.127320102	0.478546478	0	FALSE
439	442	YBR258C	chrII	-	TATA-less	TAF1-enriched	46	730139	730200	-61	YBR258C	307.2	0.087498673	NA	NA	NA	NA	NA	NA	NA	NA	NA	NA
440	443	YBR261C	chrII	-	TATA-less	TAF1-enriched	503	735510	735567	-57	YBR261C	948.2	0.00064093	0.339410692	0.008610127	0.338780657	0.583840518	0.216854336	0.229420287	0.180087376	0.595119572	1	TRUE
441	444	YBR262C	chrII	-	TATA-containing	TAF1-enriched	180	736030	736079	-49	YBR262C	1662	0.0002143	0.235766511	0.055459815	0.083321536	1	0.025374404	0.351093511	0.1897573	0.083321536	1	TRUE
442	445	YBR264C	chrII	-	TATA-less	TAF1-enriched	260	738322	738372	-50	YBR264C	259.7	0.018119619	0.013475159	0.488624753	0.427734202	0.490426693	0.00618705	0.490426693	0.806584229	0.147554504	2	TRUE
443	446	YBR265W	chrII	+	TATA-less	TAF1-enriched	63	738750	738593	-157	YBR265W	1858.1	0.000881367	0.05802402	0.192517572	0.085514806	0.820338216	0.026423811	0.820338216	0.335364891	0.085514806	1	TRUE
444	447	YBR267W	chrII	+	TATA-less	TAF1-enriched	284	739869	739824	-45	YBR267W	368.9	0.001195847	0.0583408	0.039475824	0.827197981	0.827197981	0.158805941	0.827197981	0.397854442	0.827197981	1	TRUE
445	448	YBR268W	chrII	+	TATA-less	TAF1-enriched	280	741337	741285	-52	YBR268W	1031.7	0.002169829	0.209697458	0.043376214	0.411700268	1	0.196990981	0.074330032	0.249346061	1	1	TRUE
446	449	YBR269C	chrII	-	TATA-less	TAF1-enriched	335	742398	742553	-155	YBR269C	3234.6	0.005093784	1	0.022592501	0.251557329	1	0.138814034	1	0.090706587	1	1	TRUE
447	450	YBR271W	chrII	+	TATA-less	TAF1-enriched	1296	744879	744826	-53	YBR271W	207	0.000726477	0.025256364	0.059045295	0.266733912	1	0.190129854	1	1	1	1	TRUE
448	451	YBR272C	chrII	-	TATA-containing	TAF1-enriched	48	747786	747818	-32	YBR272C	135.8	0.01734752	0.118057401	0.148722884	0.816048568	0.816048568	0.015752177	0.816048568	0.800830506	0.816048568	1	TRUE
449	452	YBR275C	chrII	-	TATA-less	TAF1-enriched	52	NA	757215	NA	YBR275C	119.4	0.018591017	0.060336661	0.157766043	0.670745945	0.424154745	0.775342819	0.424154745	0.302162705	0.851617695	0	FALSE
450	453	orphan	chrII	-	TATA-less	TAF1-enriched	15	760848	760897	-49	orphan	43.4	0.002231319	0.129634581	0.020921335	1	1	0.47495854	1	0.184572553	1	1	TRUE
451	454	YBR279W	chrII	+	TATA-less	TAF1-enriched	1353	761287	761229	-58	YBR279W	343.1	0.015793825	1	0.004878079	0.75247806	0.30953244	0.469179819	0.52820592	0.267714802	0.30953244	1	TRUE
452	455	orphan	chrII	-	TATA-containing	TAF1-enriched	358	764691	764710	-19	orphan	319.6	0.000637444	0.048581008	0.324071635	0.612235705	0.028857991	0.512863562	0.022304852	0.092135732	0.612235705	3	TRUE
453	456	YBR281C	chrII	-	TATA-less	TAF1-enriched	310	767616	767659	-43	YBR281C	383.5	0.000237421	0.028297056	0.072750946	0.841319728	0.841319728	0.009103547	0.841319728	0.796048508	0.841319728	2	TRUE
454	457	YBR282W	chrII	+	TATA-less	TAF1-depleted	986	768243	768197	-46	YBR282W	1355.3	0.000149917	0.035938931	0.161989442	0.153454036	1	0.006542563	1	1	0.021571748	3	TRUE
455	458	YBR283C	chrII	-	TATA-less	TAF1-depleted	10014	770561	770559	2	YBR283C	19767	0.019524404	0.006528097	1	1	1	0.256089327	1	1	1	1	TRUE
456	459	orphan	chrII	+	TATA-less	TAF1-depleted	41	770892	770874	-18	orphan	59.6	0.000951956	0.029831655	0.184334113	0.128426674	0.741016361	0.124523403	0.487640688	0.232198726	0.868744174	1	TRUE
457	460	YBR284W	chrII	+	TATA-less	TAF1-enriched	519	771277	771244	-33	YBR284W	1029.5	0.000312511	0.031374901	0.231808193	0.123789436	0.310046124	0.002686389	0.646633728	0.816140521	0.123789436	2	TRUE
458	461	YBR286W	chrII	+	TATA-containing	TAF1-depleted	2715	774727	774687	-40	YBR286W	3335.8	0.000247086	0.054230566	1	0.001767654	1	0.000173368	1	0.605639816	0.034968648	3	TRUE
459	462	YBR287W	chrII	+	TATA-containing	TAF1-depleted	3536	776560	776538	-22	YBR287W	2865	0.013798115	0.190622129	1	1	1	1	0.165788015	0.00225899	1	1	TRUE
460	463	YBR289W	chrII	+	TATA-less	TAF1-enriched	92	779717	779653	-64	YBR289W	2064.3	0.000222654	0.090133555	0.08463113	0.215853568	0.361801707	0.070605614	0.151845154	0.256266651	0.215853568	0	FALSE
461	464	YBR290W	chrII	+	TATA-containing	TAF1-enriched	1327	782628	782584	-44	YBR290W	4185	0.000248349	0.076376724	0.139741001	0.166622528	0.777101378	0.074160224	0.1617185	0.114846447	0.166622528	0	FALSE
462	465	YBR291C	chrII	-	TATA-less	TAF1-enriched	112	784580	784608	-28	YBR291C	184.6	0.174288797	NA	NA	NA	NA	NA	NA	NA	NA	NA	NA
463	466	CUT039	chrII	+	TATA-containing	TAF1-enriched	4	784875	784790	-85	CUT039	2.8	0.848120997	NA	NA	NA	NA	NA	NA	NA	NA	NA	NA
464	467	ST0269	chrII	+	TATA-less	TAF1-enriched	21	785471	785441	-30	ST0269	40.9	0.001158841	0.163682198	0.138670654	0.237828266	0.955173664	0.001567438	0.364191477	0.202264455	0.237828266	1	TRUE
465	468	orphan	chrII	+	TATA-less	TAF1-enriched	31	786030	785970	-60	orphan	53.8	0.005830759	0.150238505	0.060230198	0.568067482	0.444938649	0.424109091	0.256895651	0.334342647	0.256895651	0	FALSE
466	469	orphan	chrII	-	TATA-containing	TAF1-enriched	396	786468	786561	-93	orphan	116.6	0.00034832	0.147481408	0.051054565	0.13633236	0.243709377	0.079117579	0.285241775	0.187881571	0.845945522	0	FALSE
467	470	ST3913	chrII	-	TATA-less	TAF1-enriched	455	786824	786870	-46	ST3913	142.8	0.478479373	NA	NA	NA	NA	NA	NA	NA	NA	NA	NA
468	471	YBR293W	chrII	+	TATA-less	TAF1-enriched	264	787110	787097	-13	YBR293W	122.2	0.000408344	0.079999579	0.426945097	0.077617083	0.092161626	0.022714917	0.092161626	0.700311022	0.276675377	1	TRUE
469	472	orphan	chrII	-	TATA-less	TAF1-enriched	49	792040	792057	-17	orphan	251.4	0.000335216	0.021264221	0.409344145	0.019553651	1	0.002576415	1	1	1	3	TRUE
470	473	ST3914	chrII	-	TATA-less	TAF1-enriched	55	NA	792560	NA	ST3914	49	0.00447673	0.002662315	1	1	1	1	1	1	1	1	TRUE
471	474	YBR295W	chrII	+	TATA-containing	TAF1-enriched	309	792850	792833	-17	YBR295W	177	0.022144918	0.039015419	0.790720945	0.967793802	0.055646178	0.106124807	0.472336242	0.010646277	0.967793802	2	TRUE
472	475	YBR296C	chrII	-	TATA-containing	TAF1-depleted	632	798482	798590	-108	YBR296C	1130.3	0.135089234	NA	NA	NA	NA	NA	NA	NA	NA	NA	NA
473	476	YBR297W	chrII	+	TATA-less	TAF1-enriched	126	800510	800487	-23	YBR297W	200.1	0.000177419	0.033019721	0.118225119	0.074637581	1	0.006168085	1	1	1	2	TRUE
474	477	YBR298C	chrII	-	TATA-containing	TAF1-enriched	197	804871	804888	-17	YBR298C	100.2	0.013710987	0.274365321	0.257591177	1	1	1	0.008016614	0.060507701	1	1	TRUE
475	478	orphan	chrII	-	TATA-containing	TAF1-enriched	29	NA	807161	NA	orphan	0.4	0.229194968	NA	NA	NA	NA	NA	NA	NA	NA	NA	NA
476	479	orphan	chrII	+	TATA-containing	TAF1-enriched	9	NA	807368	NA	orphan	0.3	0.522463173	NA	NA	NA	NA	NA	NA	NA	NA	NA	NA
477	480	YCL064C	chrIII	-	TATA-containing	TAF1-depleted	5685	NA	16894	NA	YCL064C	402.8	0.007969634	0.084302756	0.124920728	0.390915462	0.353409766	0.803632095	0.847269978	0.667570235	0.096234666	0	FALSE
478	481	YCL063W	chrIII	+	TATA-less	TAF1-enriched	934	17319	17274	-45	YCL063W	666	0.06639529	NA	NA	NA	NA	NA	NA	NA	NA	NA	NA
479	482	YCL061C	chrIII	-	TATA-less	TAF1-enriched	892	22110	22144	-34	YCL061C	28.3	0.702155214	NA	NA	NA	NA	NA	NA	NA	NA	NA	NA
480	483	orphan	chrIII	-	TATA-containing	TAF1-enriched	58	22480	22525	-45	orphan	103.6	0.192165386	NA	NA	NA	NA	NA	NA	NA	NA	NA	NA
481	484	YCL059C	chrIII	-	TATA-less	TAF1-depleted	615	23344	23404	-60	YCL059C	42.7	0.168505365	NA	NA	NA	NA	NA	NA	NA	NA	NA	NA
482	485	YCL058W-A	chrIII	+	TATA-less	TAF1-enriched	159	23624	23562	-62	YCL058W-A	10.1	0.013463729	0.091098299	0.168936233	0.047486323	0.047486323	0.597047794	0.047486323	0.525832324	0.588832821	3	TRUE
483	486	YCL057C-A	chrIII	-	TATA-less	TAF1-enriched	7479	24311	24352	-41	YCL057C-A	366.4	0.206891729	NA	NA	NA	NA	NA	NA	NA	NA	NA	NA
484	487	YCL057W	chrIII	+	TATA-less	TAF1-enriched	24403	24805	24782	-23	YCL057W	0.6	0.265758896	NA	NA	NA	NA	NA	NA	NA	NA	NA	NA
485	488	YCL056C	chrIII	-	TATA-less	TAF1-depleted	26	27313	27540	-227	YCL056C	0.3	0.546998739	NA	NA	NA	NA	NA	NA	NA	NA	NA	NA
486	489	YCL055W	chrIII	+	TATA-less	TAF1-depleted	503	27956	27934	-22	YCL055W	21.6	0.059562154	NA	NA	NA	NA	NA	NA	NA	NA	NA	NA
487	490	CUT460	chrIII	-	TATA-containing	TAF1-enriched	9	28914	28961	-47	CUT460	76.3	0.722023546	NA	NA	NA	NA	NA	NA	NA	NA	NA	NA
488	492	orphan	chrIII	+	TATA-less	TAF1-enriched	51	NA	29618	NA	orphan	8.7	0.010876276	0.011168401	0.134850561	0.304989509	0.07946926	0.016744535	0.639345708	0.578656439	0.091489242	2	TRUE
489	493	CUT461	chrIII	-	TATA-less	TAF1-depleted	1	30274	30388	-114	CUT461	22.9	0.002152293	0.003866974	1	0.052981471	0.500608059	0.384558522	0.500608059	0.384558522	0.500608059	1	TRUE
490	494	CUT462	chrIII	-	TATA-containing	TAF1-enriched	104	31141	31197	-56	CUT462	0.7	0.74764636	NA	NA	NA	NA	NA	NA	NA	NA	NA	NA
491	495	YCL054W	chrIII	+	TATA-less	TAF1-enriched	288	31445	31418	-27	YCL054W	7.2	0.640668896	NA	NA	NA	NA	NA	NA	NA	NA	NA	NA
492	496	YCL051W	chrIII	+	TATA-less	TAF1-enriched	352	35623	35580	-43	YCL051W	21.1	0.153237604	NA	NA	NA	NA	NA	NA	NA	NA	NA	NA
493	497	YCL050C	chrIII	-	TATA-less	TAF1-enriched	4710	38819	38863	-44	YCL050C	1.5	0.473293547	NA	NA	NA	NA	NA	NA	NA	NA	NA	NA
494	498	CUT040	chrIII	+	TATA-less	TAF1-enriched	326	39226	39137	-89	CUT040	2.5	0.171024243	NA	NA	NA	NA	NA	NA	NA	NA	NA	NA
495	499	YCL049C	chrIII	-	TATA-less	TAF1-enriched	718	40733	40779	-46	YCL049C	35.9	0.692724688	NA	NA	NA	NA	NA	NA	NA	NA	NA	NA
496	500	YCL047C	chrIII	-	TATA-less	TAF1-enriched	605	44419	44448	-29	YCL047C	0.3	0.145713227	NA	NA	NA	NA	NA	NA	NA	NA	NA	NA
497	501	YCL045C	chrIII	-	TATA-containing	TAF1-enriched	5901	46894	46954	-60	YCL045C	3.6	0.13348679	NA	NA	NA	NA	NA	NA	NA	NA	NA	NA
498	502	YCL044C	chrIII	-	TATA-less	TAF1-enriched	3284	48385	48413	-28	YCL044C	0	NA	NA	NA	NA	NA	NA	NA	NA	NA	NA	NA
499	503	YCL043C	chrIII	-	TATA-containing	TAF1-enriched	29465	50242	50258	-16	YCL043C	44.3	0.426990543	NA	NA	NA	NA	NA	NA	NA	NA	NA	NA
500	504	YCL040W	chrIII	+	TATA-containing	TAF1-depleted	31364	50921	50803	-118	YCL040W	0.1	0.391625176	NA	NA	NA	NA	NA	NA	NA	NA	NA	NA
501	505	YCL039W	chrIII	+	TATA-less	TAF1-enriched	403	52669	52611	-58	YCL039W	4.3	0.45085746	NA	NA	NA	NA	NA	NA	NA	NA	NA	NA
502	506	YCL038C	chrIII	-	TATA-less	TAF1-enriched	242	NA	56595	NA	YCL038C	0.6	0.104115396	NA	NA	NA	NA	NA	NA	NA	NA	NA	NA
503	507	YCL037C	chrIII	-	TATA-less	TAF1-enriched	26597	58698	58745	-47	YCL037C	2493.3	0.000136251	0.052987069	0.155893393	0.034030078	1	0.006208896	1	1	0.034030078	3	TRUE
504	508	YCL036W	chrIII	+	TATA-less	TAF1-enriched	40	59031	59018	-13	YCL036W	86.8	NA	NA	NA	NA	NA	NA	NA	NA	NA	NA	NA
505	509	YCL035C	chrIII	-	TATA-containing	TAF1-depleted	6818	61173	61237	-64	YCL035C	6.6	0.308165097	NA	NA	NA	NA	NA	NA	NA	NA	NA	NA
506	510	YCL034W	chrIII	+	TATA-containing	TAF1-enriched	2288	61670	61608	-62	YCL034W	0	NA	NA	NA	NA	NA	NA	NA	NA	NA	NA	NA
507	511	YCL032W	chrIII	+	TATA-less	TAF1-enriched	201	63457	63388	-69	YCL032W	0	NA	NA	NA	NA	NA	NA	NA	NA	NA	NA	NA
508	512	YCL031C	chrIII	-	TATA-less	TAF1-enriched	841	65573	65601	-28	YCL031C	39.5	0.215653815	NA	NA	NA	NA	NA	NA	NA	NA	NA	NA
509	513	YCL030C	chrIII	-	TATA-less	TAF1-depleted	2220	68366	68393	-27	YCL030C	1.1	0.745249588	NA	NA	NA	NA	NA	NA	NA	NA	NA	NA
510	514	CUT041	chrIII	+	TATA-less	TAF1-enriched	89	68962	68944	-18	CUT041	3.3	0.286666189	NA	NA	NA	NA	NA	NA	NA	NA	NA	NA
511	515	YCL029C	chrIII	-	TATA-less	TAF1-enriched	34	NA	69959	NA	YCL029C	1349.5	0.001266695	0.01471814	0.671408392	0.215266309	1	0.00137601	1	1	0.215266309	2	TRUE
512	516	YCL027W	chrIII	+	TATA-less	TAF1-depleted	62	71892	71782	-110	YCL027W	122.8	0.289850628	NA	NA	NA	NA	NA	NA	NA	NA	NA	NA
513	517	orphan	chrIII	+	TATA-less	TAF1-enriched	5	74696	74645	-51	orphan	0	NA	NA	NA	NA	NA	NA	NA	NA	NA	NA	NA
514	518	YCL025C	chrIII	-	TATA-containing	TAF1-depleted	2700	77887	77950	-63	YCL025C	6	0.125452852	NA	NA	NA	NA	NA	NA	NA	NA	NA	NA
515	519	orphan	chrIII	-	TATA-less	TAF1-enriched	1390	78103	78209	-106	orphan	9.4	0.137312634	NA	NA	NA	NA	NA	NA	NA	NA	NA	NA
516	520	YCL024W	chrIII	+	TATA-less	TAF1-enriched	98	79132	79100	-32	YCL024W	0.1	NA	NA	NA	NA	NA	NA	NA	NA	NA	NA	NA
517	521	orphan	chrIII	-	TATA-less	TAF1-enriched	892	82460	82545	-85	orphan	0.8	0.373153535	NA	NA	NA	NA	NA	NA	NA	NA	NA	NA
518	522	YCL017C	chrIII	-	TATA-less	TAF1-enriched	1889	94325	94380	-55	YCL017C	9.4	0.810056089	NA	NA	NA	NA	NA	NA	NA	NA	NA	NA
519	523	YCL016C	chrIII	-	TATA-less	TAF1-enriched	3473	95750	95795	-45	YCL016C	19.9	0.73339714	NA	NA	NA	NA	NA	NA	NA	NA	NA	NA
520	524	YCL014W	chrIII	+	TATA-less	TAF1-enriched	854	96214	96184	-30	YCL014W	0.4	0.458167312	NA	NA	NA	NA	NA	NA	NA	NA	NA	NA
521	525	YCL011C	chrIII	-	TATA-less	TAF1-enriched	1235	103339	103385	-46	YCL011C	0	NA	NA	NA	NA	NA	NA	NA	NA	NA	NA	NA
522	526	YCL010C	chrIII	-	TATA-less	TAF1-enriched	267	104331	104370	-39	YCL010C	2502.3	0.000810294	0.004867838	1	0.04445482	0.282546982	0.009469812	0.761495658	0.824006248	0.320912904	3	TRUE
523	527	YCL009C	chrIII	-	TATA-less	TAF1-enriched	24848	105523	105566	-43	YCL009C	0	NA	NA	NA	NA	NA	NA	NA	NA	NA	NA	NA
524	528	CUT042	chrIII	+	TATA-less	TAF1-enriched	31	105968	105828	-140	CUT042	21.2	0.382747973	NA	NA	NA	NA	NA	NA	NA	NA	NA	NA
525	529	YCL008C	chrIII	-	TATA-less	TAF1-depleted	430	106811	106864	-53	YCL008C	0	NA	NA	NA	NA	NA	NA	NA	NA	NA	NA	NA
526	530	orphan	chrIII	+	TATA-less	TAF1-enriched	16	107586	107498	-88	orphan	5.2	0.222974221	NA	NA	NA	NA	NA	NA	NA	NA	NA	NA
527	531	YCL005W	chrIII	+	TATA-less	TAF1-enriched	1328	108038	107975	-63	YCL005W	26.4	0.840772603	NA	NA	NA	NA	NA	NA	NA	NA	NA	NA
528	532	orphan	chrIII	+	TATA-less	TAF1-enriched	1424	109259	109094	-165	orphan	10.5	0.388084338	NA	NA	NA	NA	NA	NA	NA	NA	NA	NA
529	533	YCL001W	chrIII	+	TATA-less	TAF1-enriched	400	111911	111909	-2	YCL001W	690.7	0.084524234	NA	NA	NA	NA	NA	NA	NA	NA	NA	NA
530	534	ST3953	chrIII	-	TATA-less	TAF1-enriched	8	NA	114334	NA	ST3953	4.2	0.693433674	NA	NA	NA	NA	NA	NA	NA	NA	NA	NA
531	535	YCR002C	chrIII	-	TATA-less	TAF1-enriched	2067	118351	118393	-42	YCR002C	8.3	0.489464401	NA	NA	NA	NA	NA	NA	NA	NA	NA	NA
532	536	YCR003W	chrIII	+	TATA-less	TAF1-enriched	101	118648	118598	-50	YCR003W	0.9	0.066039774	NA	NA	NA	NA	NA	NA	NA	NA	NA	NA
533	537	orphan	chrIII	+	TATA-less	TAF1-enriched	882	120296	120152	-144	orphan	2.9	0.053217915	NA	NA	NA	NA	NA	NA	NA	NA	NA	NA
534	538	YCR004C	chrIII	-	TATA-containing	TAF1-enriched	1463	120505	120541	-36	YCR004C	188.5	0.538205116	NA	NA	NA	NA	NA	NA	NA	NA	NA	NA
535	539	orphan	chrIII	+	TATA-containing	TAF1-enriched	17	120963	120802	-161	orphan	0	NA	NA	NA	NA	NA	NA	NA	NA	NA	NA	NA
536	540	YCR005C	chrIII	-	TATA-containing	TAF1-depleted	1121	122164	122385	-221	YCR005C	3.8	0.353083907	NA	NA	NA	NA	NA	NA	NA	NA	NA	NA
537	541	ST0304	chrIII	+	TATA-less	TAF1-enriched	1143	123374	123367	-7	ST0304	0.9	0.331923967	NA	NA	NA	NA	NA	NA	NA	NA	NA	NA
538	542	orphan	chrIII	+	TATA-less	TAF1-enriched	35	124116	124056	-60	orphan	0.7	0.29074833	NA	NA	NA	NA	NA	NA	NA	NA	NA	NA
539	543	orphan	chrIII	-	TATA-less	TAF1-enriched	178	124960	125011	-51	orphan	25.2	0.157283448	NA	NA	NA	NA	NA	NA	NA	NA	NA	NA
540	544	YCR007C	chrIII	-	TATA-less	TAF1-enriched	87	126344	126342	2	YCR007C	66.2	0.184391255	NA	NA	NA	NA	NA	NA	NA	NA	NA	NA
541	545	YCR008W	chrIII	+	TATA-containing	TAF1-depleted	1762	NA	128027	NA	YCR008W	2.1	0.240778719	NA	NA	NA	NA	NA	NA	NA	NA	NA	NA
542	546	YCR009C	chrIII	-	TATA-less	TAF1-enriched	629	131550	131585	-35	YCR009C	276.2	0.107669131	NA	NA	NA	NA	NA	NA	NA	NA	NA	NA
543	547	CUT044	chrIII	+	TATA-less	TAF1-enriched	18	NA	131848	NA	CUT044	0.5	0.467340668	NA	NA	NA	NA	NA	NA	NA	NA	NA	NA
544	548	YCR011C	chrIII	-	TATA-less	TAF1-enriched	288	136786	136961	-175	YCR011C	0	NA	NA	NA	NA	NA	NA	NA	NA	NA	NA	NA
545	549	YCR012W	chrIII	+	TATA-containing	TAF1-depleted	7511	137821	137706	-115	YCR012W	869.7	0.000301551	0.024868136	0.030108244	0.219152275	1	1	1	1	1	2	TRUE
546	550	YCR013C	chrIII	-	TATA-less	TAF1-enriched	16	138882	139023	-141	YCR013C	12.5	0.391802473	NA	NA	NA	NA	NA	NA	NA	NA	NA	NA
547	551	CUT045	chrIII	+	TATA-less	TAF1-enriched	61	139361	139334	-27	CUT045	0.9	0.771964185	NA	NA	NA	NA	NA	NA	NA	NA	NA	NA
548	552	YCR015C	chrIII	-	TATA-less	TAF1-enriched	456	142124	142397	-273	YCR015C	0	NA	NA	NA	NA	NA	NA	NA	NA	NA	NA	NA
549	553	orphan	chrIII	+	TATA-containing	TAF1-depleted	0	142761	142733	-28	orphan	9.6	0.10524806	NA	NA	NA	NA	NA	NA	NA	NA	NA	NA
550	554	tG(GCC)C	chrIII	+	TATA-less	-	0	NA	142832	NA	tG(GCC)C	10	0.210286309	NA	NA	NA	NA	NA	NA	NA	NA	NA	NA
551	555	YCR016W	chrIII	+	TATA-less	TAF1-enriched	1679	143651	143608	-43	YCR016W	7	0.222484841	NA	NA	NA	NA	NA	NA	NA	NA	NA	NA
552	556	YCR017C	chrIII	-	TATA-less	TAF1-enriched	4869	147635	147663	-28	YCR017C	22.7	0.537418281	NA	NA	NA	NA	NA	NA	NA	NA	NA	NA
553	558	orphan	chrIII	-	TATA-less	TAF1-enriched	96	148540	148561	-21	orphan	225.2	0.004771602	0.093449618	0.49396319	0.108349938	0.592499104	0.017677348	0.592499104	0.48958848	0.108349938	1	TRUE
554	559	orphan	chrIII	+	TATA-less	TAF1-enriched	0	NA	152289	NA	orphan	6.4	0.496275091	NA	NA	NA	NA	NA	NA	NA	NA	NA	NA
555	560	YCR019W	chrIII	+	TATA-less	TAF1-enriched	96	152839	152711	-128	YCR019W	13.6	0.425722539	NA	NA	NA	NA	NA	NA	NA	NA	NA	NA
556	561	YCR021C	chrIII	-	TATA-containing	TAF1-depleted	1691	156986	157207	-221	YCR021C	9.8	0.066880698	NA	NA	NA	NA	NA	NA	NA	NA	NA	NA
557	562	YCR022C	chrIII	-	TATA-less	TAF1-enriched	43	157657	157772	-115	YCR022C	6.1	0.137138641	NA	NA	NA	NA	NA	NA	NA	NA	NA	NA
558	563	orphan	chrIII	+	TATA-less	TAF1-enriched	295	158688	158609	-79	orphan	593	0.000181062	0.022046306	0.151878521	0.101433978	1	0.020732863	0.539064727	1	0.101433978	2	TRUE
559	564	YCR023C	chrIII	-	TATA-less	TAF1-enriched	474	160401	160450	-49	YCR023C	4.6	0.44577604	NA	NA	NA	NA	NA	NA	NA	NA	NA	NA
560	565	YCR024C-A	chrIII	-	TATA-containing	TAF1-depleted	1857	162983	163275	-292	YCR024C-A	45	0.144861378	NA	NA	NA	NA	NA	NA	NA	NA	NA	NA
561	566	orphan	chrIII	-	TATA-less	TAF1-enriched	45	163594	163697	-103	orphan	28.4	0.280556007	NA	NA	NA	NA	NA	NA	NA	NA	NA	NA
562	567	YCR026C	chrIII	-	TATA-containing	TAF1-enriched	43	166358	166413	-55	YCR026C	11.9	0.056098446	NA	NA	NA	NA	NA	NA	NA	NA	NA	NA
563	568	YCR027C	chrIII	-	TATA-less	TAF1-depleted	488	168134	168199	-65	YCR027C	0.3	0.134881616	NA	NA	NA	NA	NA	NA	NA	NA	NA	NA
564	569	tQ(UUG)C	chrIII	+	TATA-less	-	0	168563	168440	-123	tQ(UUG)C	0.6	0.230759254	NA	NA	NA	NA	NA	NA	NA	NA	NA	NA
565	570	orphan	chrIII	-	TATA-less	TAF1-enriched	12	169173	169230	-57	orphan	10.8	0.400280936	NA	NA	NA	NA	NA	NA	NA	NA	NA	NA
566	571	YCR028C	chrIII	-	TATA-containing	TAF1-enriched	1265	172426	172493	-67	YCR028C	3.2	0.490989082	NA	NA	NA	NA	NA	NA	NA	NA	NA	NA
567	572	orphan	chrIII	-	TATA-containing	TAF1-enriched	3	172715	172816	-101	orphan	10.6	0.356672679	NA	NA	NA	NA	NA	NA	NA	NA	NA	NA
568	573	YCR028C-A	chrIII	-	TATA-less	TAF1-enriched	1252	173418	173502	-84	YCR028C-A	9.2	0.057927262	NA	NA	NA	NA	NA	NA	NA	NA	NA	NA
569	574	YCR030C	chrIII	-	TATA-less	TAF1-enriched	278	176482	176517	-35	YCR030C	7.3	0.185546897	NA	NA	NA	NA	NA	NA	NA	NA	NA	NA
570	575	ST3981	chrIII	-	TATA-less	TAF1-depleted	75	176880	176904	-24	ST3981	9.9	0.313189433	NA	NA	NA	NA	NA	NA	NA	NA	NA	NA
571	576	YCR031C	chrIII	-	TATA-less	TAF1-enriched	11749	NA	178261	NA	YCR031C	1144	0.000133552	1	0.000414279	1	1	1	1	1	1	1	TRUE
572	577	orphan	chrIII	-	TATA-less	TAF1-depleted	2813	NA	178703	NA	orphan	0.4	0.427836625	NA	NA	NA	NA	NA	NA	NA	NA	NA	NA
573	578	CUT048	chrIII	+	TATA-less	TAF1-enriched	86	179188	179059	-129	CUT048	88.3	0.377826032	NA	NA	NA	NA	NA	NA	NA	NA	NA	NA
574	579	orphan	chrIII	-	TATA-less	TAF1-enriched	120	185994	186007	-13	orphan	0	NA	NA	NA	NA	NA	NA	NA	NA	NA	NA	NA
575	580	YCR033W	chrIII	+	TATA-less	TAF1-enriched	639	186324	186267	-57	YCR033W	0	NA	NA	NA	NA	NA	NA	NA	NA	NA	NA	NA
576	581	YCR034W	chrIII	+	TATA-less	TAF1-enriched	51488	190606	190566	-40	YCR034W	0	NA	NA	NA	NA	NA	NA	NA	NA	NA	NA	NA
577	582	YCR035C	chrIII	-	TATA-less	TAF1-enriched	344	193010	193036	-26	YCR035C	0.9	0.261788413	NA	NA	NA	NA	NA	NA	NA	NA	NA	NA
578	583	YCR036W	chrIII	+	TATA-less	TAF1-enriched	230	193331	193257	-74	YCR036W	29.2	0.045655147	0.405061947	0.240162089	0.585326046	0.954541016	0.029535553	0.488807621	0.162030302	0.813304955	1	TRUE
579	584	YCR037C	chrIII	-	TATA-less	TAF1-enriched	79	197039	197174	-135	YCR037C	0	NA	NA	NA	NA	NA	NA	NA	NA	NA	NA	NA
580	585	orphan	chrIII	+	TATA-less	TAF1-enriched	18	197655	197646	-9	orphan	0	NA	NA	NA	NA	NA	NA	NA	NA	NA	NA	NA
581	586	ST0323	chrIII	+	TATA-less	TAF1-enriched	306	202768	202731	-37	ST0323	0.3	0.391625176	NA	NA	NA	NA	NA	NA	NA	NA	NA	NA
582	587	YCR042C	chrIII	-	TATA-less	TAF1-enriched	188	205388	205420	-32	YCR042C	211	0.011256299	0.044296644	1	0.684078128	0.531811252	0.005430754	0.531811252	0.419559391	0.531811252	2	TRUE
583	588	YCR043C	chrIII	-	TATA-less	TAF1-enriched	283	206625	206675	-50	YCR043C	43.3	0.265689751	NA	NA	NA	NA	NA	NA	NA	NA	NA	NA
584	589	YCR044C	chrIII	-	TATA-less	TAF1-enriched	797	207927	207960	-33	YCR044C	27.2	0.450568409	NA	NA	NA	NA	NA	NA	NA	NA	NA	NA
585	590	YCR045C	chrIII	-	TATA-less	TAF1-enriched	5	209914	209986	-72	YCR045C	0.2	0.332289146	NA	NA	NA	NA	NA	NA	NA	NA	NA	NA
586	591	YCR046C	chrIII	-	TATA-less	TAF1-enriched	9690	210397	210429	-32	YCR046C	0	NA	NA	NA	NA	NA	NA	NA	NA	NA	NA	NA
587	592	YCR047C	chrIII	-	TATA-less	TAF1-enriched	91	211581	211634	-53	YCR047C	0	NA	NA	NA	NA	NA	NA	NA	NA	NA	NA	NA
588	593	YCR048W	chrIII	+	TATA-less	TAF1-enriched	641	211902	211882	-20	YCR048W	15.6	0.668581906	NA	NA	NA	NA	NA	NA	NA	NA	NA	NA
589	594	YCR051W	chrIII	+	TATA-less	TAF1-enriched	1691	214099	214062	-37	YCR051W	720.4	0.006201581	0.029864232	0.326665766	0.357064097	1	0.124598331	1	0.197727482	1	1	TRUE
590	595	YCR052W	chrIII	+	TATA-less	TAF1-enriched	4748	215014	214961	-53	YCR052W	15	0.167333088	NA	NA	NA	NA	NA	NA	NA	NA	NA	NA
591	596	YCR053W	chrIII	+	TATA-less	TAF1-enriched	17163	216690	216622	-68	YCR053W	510.5	0.000485814	0.157615128	0.062302103	0.086768173	0.741879866	0.027030077	0.176888915	0.482932578	0.741879866	1	TRUE
592	597	YCR054C	chrIII	-	TATA-less	TAF1-enriched	643	220022	220171	-149	YCR054C	9.3	0.108295797	NA	NA	NA	NA	NA	NA	NA	NA	NA	NA
593	598	YCR057C	chrIII	-	TATA-less	TAF1-enriched	3767	223225	223284	-59	YCR057C	276.6	0.355253966	NA	NA	NA	NA	NA	NA	NA	NA	NA	NA
594	599	ST0331	chrIII	+	TATA-less	TAF1-enriched	73	223542	223511	-31	ST0331	0.7	0.509116187	NA	NA	NA	NA	NA	NA	NA	NA	NA	NA
595	600	YCR060W	chrIII	+	TATA-containing	TAF1-enriched	286	224448	224399	-49	YCR060W	3.4	0.045477657	0.011237331	0.961606827	0.952616021	0.8275222	0.14390825	0.271634488	0.919272278	0.345515386	1	TRUE
596	601	YCR061W	chrIII	+	TATA-less	TAF1-enriched	190	225560	225493	-67	YCR061W	0.6	0.691253164	NA	NA	NA	NA	NA	NA	NA	NA	NA	NA
597	602	tS(CGA)C	chrIII	+	TATA-less	-	413	NA	227932	NA	tS(CGA)C	3.2	0.15599575	NA	NA	NA	NA	NA	NA	NA	NA	NA	NA
598	603	YCR063W	chrIII	+	TATA-less	TAF1-enriched	2262	228346	228295	-51	YCR063W	2.9	0.153733381	NA	NA	NA	NA	NA	NA	NA	NA	NA	NA
599	604	YCR064C	chrIII	-	TATA-less	TAF1-enriched	31	228494	228505	-11	YCR064C	192.5	0.001621502	0.228676432	0.145790601	0.790573902	0.063033076	0.731716188	0.790573902	0.004068616	0.790573902	1	TRUE
600	605	YCR065W	chrIII	+	TATA-less	TAF1-depleted	575	229297	229129	-168	YCR065W	1780.5	0.002462841	0.185916413	0.072626722	0.082983155	0.660026105	0.170814814	0.131201116	0.780726794	0.198746438	0	FALSE
601	606	YCR066W	chrIII	+	TATA-less	TAF1-enriched	658	231506	231454	-52	YCR066W	9.7	0.124717039	NA	NA	NA	NA	NA	NA	NA	NA	NA	NA
602	607	YCR067C	chrIII	-	TATA-containing	TAF1-enriched	5499	236380	236441	-61	YCR067C	1	0.738855149	NA	NA	NA	NA	NA	NA	NA	NA	NA	NA
603	608	YCR068W	chrIII	+	TATA-less	TAF1-enriched	136	237108	237075	-33	YCR068W	24.9	0.269541101	NA	NA	NA	NA	NA	NA	NA	NA	NA	NA
604	609	CUT467	chrIII	-	TATA-less	TAF1-enriched	99	238459	238646	-187	CUT467	11.4	0.388959869	NA	NA	NA	NA	NA	NA	NA	NA	NA	NA
605	610	YCR069W	chrIII	+	TATA-less	TAF1-enriched	5147	238962	238931	-31	YCR069W	6.1	0.14692872	NA	NA	NA	NA	NA	NA	NA	NA	NA	NA
606	611	YCR071C	chrIII	-	TATA-less	TAF1-enriched	261	240541	240582	-41	YCR071C	12.8	0.274376629	NA	NA	NA	NA	NA	NA	NA	NA	NA	NA
607	612	YCR072C	chrIII	-	TATA-containing	TAF1-enriched	1642	242337	242379	-42	YCR072C	38.2	0.309733888	NA	NA	NA	NA	NA	NA	NA	NA	NA	NA
608	613	ST0339	chrIII	+	TATA-less	TAF1-enriched	397	242625	242592	-33	ST0339	2	0.26939315	NA	NA	NA	NA	NA	NA	NA	NA	NA	NA
609	614	YCR073C	chrIII	-	TATA-less	TAF1-enriched	21	246591	246639	-48	YCR073C	1.1	0.028053651	0.042541427	0.141384907	0.241676543	0.037212458	0.654317872	0.806372127	0.033646991	0.727781888	3	TRUE
610	615	YCR073W-A	chrIII	+	TATA-less	TAF1-enriched	1313	246992	246950	-42	YCR073W-A	16.2	0.46013376	NA	NA	NA	NA	NA	NA	NA	NA	NA	NA
611	616	YCR075C	chrIII	-	TATA-less	TAF1-depleted	73	248787	248813	-26	YCR075C	0	NA	NA	NA	NA	NA	NA	NA	NA	NA	NA	NA
612	617	orphan	chrIII	-	TATA-containing	TAF1-enriched	104	250002	250039	-37	orphan	0.2	0.360460443	NA	NA	NA	NA	NA	NA	NA	NA	NA	NA
613	618	YCR077C	chrIII	-	TATA-less	TAF1-enriched	414	252606	252645	-39	YCR077C	240	0.448910859	NA	NA	NA	NA	NA	NA	NA	NA	NA	NA
614	619	YCR079W	chrIII	+	TATA-less	TAF1-enriched	166	252879	252813	-66	YCR079W	0	NA	NA	NA	NA	NA	NA	NA	NA	NA	NA	NA
615	620	YCR081W	chrIII	+	TATA-less	TAF1-enriched	3515	254418	254357	-61	YCR081W	13.2	0.381570564	NA	NA	NA	NA	NA	NA	NA	NA	NA	NA
616	621	YCR082W	chrIII	+	TATA-less	TAF1-enriched	6732	258885	258853	-32	YCR082W	6.1	0.290128459	NA	NA	NA	NA	NA	NA	NA	NA	NA	NA
617	622	YCR083W	chrIII	+	TATA-less	TAF1-enriched	659	259590	259543	-47	YCR083W	2.6	0.940868838	NA	NA	NA	NA	NA	NA	NA	NA	NA	NA
618	623	YCR084C	chrIII	-	TATA-less	TAF1-enriched	27585	262597	262677	-80	YCR084C	4184.6	0.000133552	0.012536753	1	1	1	0.000414279	1	1	0.006238807	3	TRUE
619	624	YCR086W	chrIII	+	TATA-less	TAF1-enriched	85	263401	263314	-87	YCR086W	17.3	0.070567606	NA	NA	NA	NA	NA	NA	NA	NA	NA	NA
620	625	YCR087C-A	chrIII	-	TATA-less	TAF1-enriched	465	264443	264493	-50	YCR087C-A	0.2	0.351200665	NA	NA	NA	NA	NA	NA	NA	NA	NA	NA
621	626	YCR088W	chrIII	+	TATA-less	TAF1-enriched	3283	265086	265029	-57	YCR088W	3.3	0.82409123	NA	NA	NA	NA	NA	NA	NA	NA	NA	NA
622	627	YCR089W	chrIII	+	TATA-less	TAF1-depleted	45	267157	267136	-21	YCR089W	528.2	0.001191906	0.019123184	0.172597085	0.357867277	1	0.026040883	1	1	1	2	TRUE
623	628	YCR090C	chrIII	-	TATA-less	TAF1-enriched	78	272837	272878	-41	YCR090C	0.4	0.67859153	NA	NA	NA	NA	NA	NA	NA	NA	NA	NA
624	629	YCR092C	chrIII	-	TATA-less	TAF1-enriched	25	279828	279849	-21	YCR092C	1151.4	0.000207994	0.141756911	0.026426226	1	0.462474242	1	0.115365913	0.004754685	1	2	TRUE
625	630	YCR093W	chrIII	+	TATA-less	TAF1-enriched	614	280129	280087	-42	YCR093W	18.4	0.097808074	NA	NA	NA	NA	NA	NA	NA	NA	NA	NA
626	631	YCR094W	chrIII	+	TATA-less	TAF1-enriched	2999	286748	286699	-49	YCR094W	1.4	0.607203464	NA	NA	NA	NA	NA	NA	NA	NA	NA	NA
627	632	YCR095C	chrIII	-	TATA-less	TAF1-enriched	118	289247	289296	-49	YCR095C	2.2	0.512750826	NA	NA	NA	NA	NA	NA	NA	NA	NA	NA
628	633	YCR095W-A	chrIII	+	TATA-less	TAF1-enriched	20	289522	289501	-21	YCR095W-A	70.6	0.770862846	NA	NA	NA	NA	NA	NA	NA	NA	NA	NA
629	634	YCR097W	chrIII	+	TATA-less	TAF1-enriched	204	293856	293832	-24	YCR097W	62	0.579023754	NA	NA	NA	NA	NA	NA	NA	NA	NA	NA
630	635	orphan	chrIII	-	TATA-less	TAF1-enriched	173	299053	299017	36	orphan	0.2	0.612740112	NA	NA	NA	NA	NA	NA	NA	NA	NA	NA
631	636	YCR106W	chrIII	+	TATA-less	TAF1-enriched	44	310968	310944	-24	YCR106W	0.8	0.23951559	NA	NA	NA	NA	NA	NA	NA	NA	NA	NA
632	637	orphan	chrIV	-	TATA-less	TAF1-enriched	105	20037	20129	-92	orphan	79.3	0.000843221	0.036443195	0.023359958	0.365238761	0.446537371	0.162571128	0.265383708	0.080432625	0.602491239	2	TRUE
633	638	YDL241W	chrIV	+	TATA-less	TAF1-enriched	137	20194	20178	-16	YDL241W	33.8	0.001943943	0.161243927	0.070373972	0.345606604	0.860419138	0.079402627	0.174219924	0.265103651	0.45246063	0	FALSE
634	639	orphan	chrIV	-	TATA-containing	TAF1-enriched	0	20380	20483	-103	orphan	0.8	0.579418427	NA	NA	NA	NA	NA	NA	NA	NA	NA	NA
635	640	CUT468	chrIV	-	TATA-less	TAF1-enriched	4	22413	22436	-23	CUT468	109.2	0.01721058	0.130207542	0.109976244	0.641464934	0.589089589	0.547737704	0.445064787	0.400003489	0.641464934	0	FALSE
636	641	YDL240W	chrIV	+	TATA-less	TAF1-enriched	1904	22680	22651	-29	YDL240W	42.9	0.109201276	NA	NA	NA	NA	NA	NA	NA	NA	NA	NA
637	642	YDL236W	chrIV	+	TATA-less	TAF1-enriched	1504	32311	32259	-52	YDL236W	1042.6	0.000776555	0.117882789	0.242347956	0.252354373	0.625353605	0.010696722	0.114819737	0.515026722	0.294364554	1	TRUE
638	643	YDL235C	chrIV	-	TATA-less	TAF1-depleted	347	33998	34025	-27	YDL235C	1871.9	0.000140056	1	0.00303247	1	0.00806902	1	0.013202713	1	1	3	TRUE
639	644	orphan	chrIV	+	TATA-less	TAF1-enriched	8	NA	34315	NA	orphan	1.9	0.127834569	NA	NA	NA	NA	NA	NA	NA	NA	NA	NA
640	645	YDL232W	chrIV	+	TATA-less	TAF1-enriched	3046	38504	38458	-46	YDL232W	9101.6	0.000222029	0.051108825	0.073344253	1	1	0.033552127	0.086089746	0.634910705	1	1	TRUE
641	646	YDL231C	chrIV	-	TATA-less	TAF1-enriched	331	42315	42349	-34	YDL231C	197.8	0.001453478	0.166625576	0.016892485	0.629741793	0.809520119	0.533694714	0.179283027	0.266402425	0.629741793	1	TRUE
642	647	YDL230W	chrIV	+	TATA-less	TAF1-enriched	286	42704	42670	-34	YDL230W	930.4	0.000213828	0.079082056	0.208943842	0.115164888	0.168698048	0.041968891	0.107711925	0.653011047	0.115164888	1	TRUE
643	648	YDL229W	chrIV	+	TATA-containing	TAF1-depleted	11366	44056	44035	-21	YDL229W	37073	NA	NA	NA	NA	NA	NA	NA	NA	NA	NA	NA
644	649	YDL227C	chrIV	-	TATA-less	TAF1-enriched	390	47967	48070	-103	YDL227C	157.8	0.007376653	0.029899059	0.261373422	1	0.218566016	1	0.218566016	0.427086226	1	1	TRUE
645	650	orphan	chrIV	+	TATA-less	TAF1-enriched	48	49907	49902	-5	orphan	74.6	0.01957565	0.02253441	0.110949153	0.0055834	0.060899051	0.396493575	0.712546727	0.634322815	0.020192006	3	TRUE
646	651	orphan	chrIV	+	TATA-containing	TAF1-enriched	59	50595	50512	-83	orphan	41.3	0.088711636	NA	NA	NA	NA	NA	NA	NA	NA	NA	NA
647	652	YDL226C	chrIV	-	TATA-less	TAF1-enriched	7087	52162	52200	-38	YDL226C	2165.3	0.000211087	0.024268658	0.288209589	0.104857982	1	0.001442497	1	1	0.104857982	2	TRUE
648	653	YDL225W	chrIV	+	TATA-less	TAF1-enriched	2767	52442	52396	-46	YDL225W	461.4	0.000852471	0.147146257	0.082981189	0.096568268	0.408368155	0.031930822	0.408368155	0.907457218	0.096568268	1	TRUE
649	654	YDL224C	chrIV	-	TATA-less	TAF1-enriched	277	56665	56710	-45	YDL224C	215.4	0.003831043	0.370783951	0.032724058	0.14372903	0.380363534	0.05909428	0.438916876	0.411296707	0.14372903	1	TRUE
650	655	YDL219W	chrIV	+	TATA-less	TAF1-enriched	386	65277	65211	-66	YDL219W	1045.3	0.000258411	0.02460235	0.162368318	0.167347015	0.880983168	0.02156055	0.880983168	0.355744577	0.294610531	2	TRUE
651	656	CUT470	chrIV	-	TATA-less	TAF1-enriched	1	65912	65946	-34	CUT470	88.6	0.00060466	0.534643034	0.054242437	0.065031695	0.345283969	0.017221861	0.345283969	0.373943974	0.065031695	1	TRUE
652	657	YDL217C	chrIV	-	TATA-less	TAF1-enriched	115	68715	68770	-55	YDL217C	236.6	0.006828379	1	0.169153193	1	0.002592588	1	0.002592588	0.085029271	1	2	TRUE
653	658	orphan	chrIV	-	TATA-less	TAF1-enriched	166	70279	70298	-19	orphan	149.5	0.005665707	1	0.012202354	0.060256163	0.911193112	0.015280231	0.649314663	0.418770535	0.060256163	2	TRUE
654	659	orphan	chrIV	-	TATA-less	TAF1-enriched	228	73298	73360	-62	orphan	556.9	0.02857711	1	0.098960154	1	1	1	0.000789113	0.243345009	1	1	TRUE
655	660	CUT050	chrIV	+	TATA-less	TAF1-enriched	21	73625	73601	-24	CUT050	51.9	0.006097245	0.035162845	0.336042767	0.806232869	0.248596297	0.318806862	0.050792921	0.841963509	0.806232869	1	TRUE
656	661	YDL215C	chrIV	-	TATA-less	TAF1-enriched	168	73932	74100	-168	YDL215C	745	0.005077072	0.103803273	0.612799882	0.017504754	1	0.443183601	0.019473956	0.522807584	1	2	TRUE
657	662	orphan	chrIV	+	TATA-less	TAF1-enriched	21	74428	74423	-5	orphan	7.4	0.090517424	NA	NA	NA	NA	NA	NA	NA	NA	NA	NA
658	663	YDL213C	chrIV	-	TATA-less	TAF1-enriched	228	77936	77985	-49	YDL213C	2113.2	0.001565621	0.515849356	0.024983303	0.58120601	0.097950483	0.47637593	0.097950483	0.032644344	0.58120601	2	TRUE
659	664	YDL212W	chrIV	+	TATA-containing	TAF1-enriched	682	78435	78387	-48	YDL212W	4287.2	0.000464834	0.047727932	0.064017933	0.484180472	1	0.104011127	1	0.136162409	1	1	TRUE
660	665	ST0370	chrIV	+	TATA-less	TAF1-enriched	85	80738	80708	-30	ST0370	51.3	0.017964157	0.794909333	0.215515117	0.065401072	0.59195721	0.153522391	0.59195721	0.153522391	0.065401072	0	FALSE
661	666	tG(GCC)D1	chrIV	-	TATA-less	-	0	83390	83470	-80	tG(GCC)D1	0	NA	NA	NA	NA	NA	NA	NA	NA	NA	NA	NA
662	667	YDL209C	chrIV	-	TATA-less	TAF1-enriched	59	87216	87248	-32	YDL209C	437.4	0.001098017	0.053548832	0.421188047	0.180465214	0.378245177	0.020309504	0.378245177	0.255312869	0.378245177	1	TRUE
663	668	YDL208W	chrIV	+	TATA-less	TAF1-enriched	2408	87535	87467	-68	YDL208W	5336	0.002285773	0.434407524	0.020615621	0.047226786	0.785849821	0.010417039	0.875689765	0.940687861	0.526096873	3	TRUE
664	669	YDL207W	chrIV	+	TATA-less	TAF1-enriched	821	88279	88243	-36	YDL207W	230.8	0.007301079	0.443119266	0.039289508	0.161445028	0.054190135	0.366078475	0.752722689	0.572140362	0.483856087	1	TRUE
665	670	YDL205C	chrIV	-	TATA-containing	TAF1-enriched	426	93888	93929	-41	YDL205C	2068.6	0.000499685	0.039532859	0.179413431	0.22656842	0.513339651	0.014398044	0.513339651	0.642562044	0.295637578	2	TRUE
666	671	YDL204W	chrIV	+	TATA-less	TAF1-enriched	283	94358	94205	-153	YDL204W	210.9	0.113246936	NA	NA	NA	NA	NA	NA	NA	NA	NA	NA
667	672	YDL203C	chrIV	-	TATA-less	TAF1-enriched	44	97924	98091	-167	YDL203C	310.4	0.001712629	0.083681174	0.170112294	0.295832899	0.191292817	0.073058611	0.870246394	0.282160498	0.083369303	0	FALSE
668	673	YDL202W	chrIV	+	TATA-less	TAF1-enriched	293	98476	98422	-54	YDL202W	304.9	0.000969728	0.052483422	0.240993329	0.182263384	0.729489443	0.011413357	0.347929507	0.655285197	0.331276097	1	TRUE
669	674	CUT472	chrIV	-	TATA-less	TAF1-enriched	27	99252	99330	-78	CUT472	20.2	0.070450116	NA	NA	NA	NA	NA	NA	NA	NA	NA	NA
670	675	YDL201W	chrIV	+	TATA-less	TAF1-enriched	1450	99551	99518	-33	YDL201W	756.1	0.000420291	0.09419653	0.147758692	0.051292076	0.372431478	0.023802562	0.186376376	0.948993486	0.791568031	1	TRUE
671	676	YDL198C	chrIV	-	TATA-less	TAF1-depleted	1292	104464	104585	-121	YDL198C	576.7	0.000353937	0.045686222	0.269797841	0.04626402	0.343393919	0.010084405	0.534755456	0.486457509	0.04626402	4	TRUE
672	677	YDL196W	chrIV	+	TATA-less	TAF1-enriched	176	106814	106739	-75	YDL196W	25.6	0.059877308	NA	NA	NA	NA	NA	NA	NA	NA	NA	NA
673	678	YDL197C	chrIV	-	TATA-less	TAF1-enriched	79	106814	106846	-32	YDL197C	327	0.000485564	0.099679052	0.133767161	0.230261642	0.993575839	0.022821789	0.354481584	0.14274897	0.24301705	1	TRUE
674	679	YDL194W	chrIV	+	TATA-less	TAF1-enriched	201	111410	111372	-38	YDL194W	182.6	0.001521459	0.053315053	0.574792204	0.078695591	0.82437459	0.003145442	0.505560647	0.390064567	0.267167083	1	TRUE
675	680	YDL193W	chrIV	+	TATA-less	TAF1-depleted	1539	114783	114599	-184	YDL193W	1540.4	0.00084171	0.248704634	0.130270938	0.234144317	0.282429178	0.124547751	0.058039926	0.114489093	0.234144317	0	FALSE
676	681	CUT473	chrIV	-	TATA-less	TAF1-enriched	47	NA	115954	NA	CUT473	54.8	0.002872591	0.235599589	0.127798922	0.866250743	0.647565134	0.0177375	0.011525766	0.22573784	0.526348301	2	TRUE
677	682	YDL192W	chrIV	+	TATA-less	TAF1-enriched	292	116300	116238	-62	YDL192W	31046.8	0.000136559	0.020700274	0.076881205	1	1	0.012354585	1	1	1	2	TRUE
678	683	YDL191W	chrIV	+	TATA-less	TAF1-enriched	3999	117682	117611	-71	YDL191W	6741.1	0.001618493	0.751557068	0.003983905	0.069279883	0.620294015	0.915106034	0.620294015	0.216248934	0.069279883	1	TRUE
679	684	orphan	chrIV	-	TATA-less	TAF1-enriched	0	117682	117761	-79	orphan	0.1	0.391910646	NA	NA	NA	NA	NA	NA	NA	NA	NA	NA
680	685	YDL190C	chrIV	-	TATA-less	TAF1-enriched	3958	121741	121785	-44	YDL190C	1521.5	0.000694601	0.184878422	0.030035123	0.467706315	0.467706315	0.013447276	0.467706315	1	0.467706315	2	TRUE
681	686	YDL189W	chrIV	+	TATA-less	TAF1-enriched	378	122021	121996	-25	YDL189W	354	0.000246642	0.014086932	0.232343714	0.09457075	1	0.006503405	1	1	1	2	TRUE
682	687	YDL188C	chrIV	-	TATA-less	TAF1-enriched	1296	125119	125180	-61	YDL188C	357.5	0.003635575	0.06640262	0.382425459	0.049732992	0.236476874	0.042275919	0.42682787	0.883485542	0.049732992	3	TRUE
683	688	orphan	chrIV	-	TATA-less	TAF1-enriched	472	126403	126473	-70	orphan	268.5	0.302789338	NA	NA	NA	NA	NA	NA	NA	NA	NA	NA
684	689	YDL185W	chrIV	+	TATA-less	TAF1-enriched	4644	126753	126686	-67	YDL185W	36352.9	0.000157926	0.119752238	0.099489645	0.124239416	1	0.04719538	0.071143132	0.092462816	1	1	TRUE
685	690	YDL184C	chrIV	-	TATA-less	TAF1-enriched	578296	130465	130506	-41	YDL184C	134402.4	NA	NA	NA	NA	NA	NA	NA	NA	NA	NA	NA
686	691	orphan	chrIV	+	TATA-less	TAF1-enriched	6	132179	132159	-20	orphan	30.2	0.081879246	NA	NA	NA	NA	NA	NA	NA	NA	NA	NA
687	692	CUT474	chrIV	-	TATA-less	TAF1-enriched	87	132519	132673	-154	CUT474	52.3	0.00081946	0.026474095	0.563947374	0.016826388	0.156167098	0.01395517	0.385911721	0.761601118	0.05687369	3	TRUE
688	693	YDL182W	chrIV	+	TATA-containing	TAF1-depleted	13775	133412	133405	-7	YDL182W	1553.3	0.000577981	0.020991237	0.230284446	0.143238933	0.405564385	0.020378553	0.89413332	0.863594526	0.072411022	2	TRUE
689	694	CUT475	chrIV	-	TATA-less	TAF1-enriched	49	134696	134743	-47	CUT475	114.7	0.003096351	0.062795486	0.860444627	0.027898146	0.327584827	0.013679001	0.859870344	0.619005234	0.343693738	2	TRUE
690	695	YDL181W	chrIV	+	TATA-less	TAF1-depleted	1533	135208	135114	-94	YDL181W	1392.4	0.509161945	NA	NA	NA	NA	NA	NA	NA	NA	NA	NA
691	696	YDL180W	chrIV	+	TATA-less	TAF1-depleted	619	NA	135764	NA	YDL180W	53.7	0.008698417	0.059192782	0.522781659	0.090682382	0.39066854	0.004069746	0.588016738	0.511624197	0.185134157	1	TRUE
692	697	YDL179W	chrIV	+	TATA-less	TAF1-depleted	256	138289	138196	-93	YDL179W	493.4	0.001051094	0.00523865	0.190622129	1	1	1	1	1	1	1	TRUE
693	698	CUT476	chrIV	-	TATA-less	TAF1-enriched	23	139138	139257	-119	CUT476	105.7	0.058089139	NA	NA	NA	NA	NA	NA	NA	NA	NA	NA
694	699	YDL178W	chrIV	+	TATA-less	TAF1-enriched	561	139531	139500	-31	YDL178W	593.3	0.0008588	0.008324586	1	0.080369262	0.497766476	0.023985267	0.497766476	0.381408051	0.080369262	2	TRUE
695	700	YDL177C	chrIV	-	TATA-less	TAF1-depleted	65	141542	141706	-164	YDL177C	169.3	0.033892557	0.134200487	1	0.16108685	0.16108685	0.06383074	0.037064962	0.17132573	0.16108685	1	TRUE
696	701	YDL176W	chrIV	+	TATA-less	TAF1-enriched	318	142003	141960	-43	YDL176W	90.9	0.001024849	0.007478019	1	1	1	0.001674835	1	1	1	2	TRUE
697	702	YDL175C	chrIV	-	TATA-less	TAF1-depleted	3398	145510	145545	-35	YDL175C	103.4	0.008203465	0.436221494	0.038861924	0.141339495	0.480841492	0.057587894	0.240028206	0.761613939	0.480841492	1	TRUE
698	703	YDL174C	chrIV	-	TATA-containing	TAF1-enriched	1281	147520	147617	-97	YDL174C	381.9	0.000697125	0.251041609	0.087966477	0.014077339	0.845077303	0.012015915	0.381537695	0.517558696	0.845077303	2	TRUE
699	704	YDL173W	chrIV	+	TATA-less	TAF1-enriched	1380	148209	148172	-37	YDL173W	428	0.004793291	0.257986491	0.012547528	1	1	0.423795954	1	0.456458691	1	1	TRUE
700	705	YDL172C	chrIV	-	TATA-less	TAF1-enriched	37	149373	149422	-49	YDL172C	54.9	0.456204888	NA	NA	NA	NA	NA	NA	NA	NA	NA	NA
701	706	YDL171C	chrIV	-	TATA-less	TAF1-enriched	4289	155849	155916	-67	YDL171C	439.9	0.000444727	0.057528162	0.020448542	0.512279607	0.168786425	0.062722566	0.066532615	0.915782825	0.412720624	1	TRUE
702	707	YDL170W	chrIV	+	TATA-less	TAF1-enriched	31	156360	156318	-42	YDL170W	449	0.001731048	0.077593112	0.231504693	0.560823222	0.2687717	0.012945523	0.560823222	0.518855128	0.054219656	1	TRUE
703	708	YDL168W	chrIV	+	TATA-less	TAF1-depleted	408	159568	159548	-20	YDL168W	687	0.001027817	0.076769644	0.064792031	0.852886374	0.852886374	0.031194559	0.258695716	0.810796981	0.852886374	1	TRUE
704	709	YDL167C	chrIV	-	TATA-less	TAF1-enriched	264	163155	163197	-42	YDL167C	674.8	0.000467723	0.005452361	1	0.082150533	0.58585426	0.02482017	0.229310395	0.481804712	0.143853264	2	TRUE
705	710	CUT051	chrIV	+	TATA-containing	TAF1-enriched	66	163445	163378	-67	CUT051	43.9	0.004876227	0.145330168	0.082616246	0.993571797	0.298661917	0.256912824	0.993571797	0.0569886	0.865647562	0	FALSE
706	711	YDL166C	chrIV	-	TATA-containing	TAF1-enriched	585	164035	164098	-63	YDL166C	783.9	0.001085789	0.006057987	0.60415872	0.504050289	0.285065698	0.120519921	0.285065698	0.167560646	0.592992601	1	TRUE
707	712	YDL164C	chrIV	-	TATA-less	TAF1-enriched	2482	NA	167254	NA	YDL164C	68.2	0.055381008	NA	NA	NA	NA	NA	NA	NA	NA	NA	NA
708	713	YDL161W	chrIV	+	TATA-less	TAF1-enriched	59	167743	167714	-29	YDL161W	585	0.001014454	1	0.001655877	1	0.165128413	1	0.137874077	1	1	1	TRUE
709	714	YDL160C-A	chrIV	-	TATA-less	TAF1-enriched	250	169582	169628	-46	YDL160C-A	299.6	0.001625647	0.281167577	0.248221998	0.068540366	0.437868565	0.004052913	1	0.198933124	1	1	TRUE
710	715	YDL160C	chrIV	-	TATA-less	TAF1-enriched	6517	172168	172214	-46	YDL160C	4478.5	0.00013955	0.019216258	0.019216258	1	1	1	1	1	1	2	TRUE
711	716	YDL159W	chrIV	+	TATA-less	TAF1-enriched	133	172474	172435	-39	YDL159W	639.3	0.000138833	0.000422468	1	1	1	1	1	1	1	1	TRUE
712	717	YDL157C	chrIV	-	TATA-less	TAF1-enriched	2129	174578	174623	-45	YDL157C	1503.6	0.001368746	0.104342865	0.31094844	0.14858234	0.256615827	0.062193298	0.085061801	0.405203933	0.14858234	0	FALSE
713	718	YDL156W	chrIV	+	TATA-less	TAF1-enriched	11	174872	174824	-48	YDL156W	152.9	0.000351756	0.081881238	0.071881309	0.51633577	0.165022668	0.171264464	0.080144836	0.164722157	0.888929347	0	FALSE
714	719	YDL155W	chrIV	+	TATA-less	TAF1-enriched	96	176679	176643	-36	YDL155W	154.1	0.005684113	0.01053888	1	0.229349094	0.229349094	0.070526226	0.229349094	0.288338331	0.710970615	1	TRUE
715	720	orphan	chrIV	-	TATA-less	TAF1-enriched	7	179634	179814	-180	orphan	1.9	0.097376665	NA	NA	NA	NA	NA	NA	NA	NA	NA	NA
716	721	orphan	chrIV	+	TATA-less	TAF1-enriched	93	180094	180006	-88	orphan	358.9	0.000760373	0.022751329	0.432545392	0.093471914	0.939530045	0.030352191	0.939530045	0.402090802	0.093471914	2	TRUE
717	722	YDL153C	chrIV	-	TATA-containing	TAF1-enriched	103	183015	183044	-29	YDL153C	361.5	0.000223915	0.212482346	0.078383403	0.164568853	0.225083141	0.021896629	0.355537895	0.117317274	0.398914359	1	TRUE
718	723	YDL150W	chrIV	+	TATA-less	TAF1-enriched	113	183291	183247	-44	YDL150W	936.9	0.001293384	0.098745018	0.12634516	0.138339653	0.407151599	0.055715174	0.744013634	0.213839641	0.886812073	0	FALSE
719	724	YDL148C	chrIV	-	TATA-less	TAF1-enriched	104	190594	190637	-43	YDL148C	1307.6	0.000541173	0.11041155	0.176774131	0.074694043	0.439245659	0.023972215	0.439245659	0.318016386	0.239189116	1	TRUE
720	725	YDL147W	chrIV	+	TATA-less	TAF1-enriched	1477	190920	190878	-42	YDL147W	3708.4	0.000283045	0.2871646	0.021104021	0.073548788	0.9033321	0.020881592	0.543674476	0.320691735	0.28153172	2	TRUE
721	726	YDL146W	chrIV	+	TATA-less	TAF1-enriched	710	192917	192594	-323	YDL146W	602.6	0.001029743	0.109623706	0.57603634	0.0180231	0.597861701	0.002262741	0.645935239	0.809063059	0.046502439	3	TRUE
722	727	YDL145C	chrIV	-	TATA-less	TAF1-enriched	2129	198411	198438	-27	YDL145C	1786.8	0.000434221	0.108610719	0.03241203	0.101633069	0.849664962	0.806686606	0.184567738	0.136102762	0.849664962	1	TRUE
723	728	YDL144C	chrIV	-	TATA-less	TAF1-enriched	395	199715	199749	-34	YDL144C	528.8	0.001006807	0.185641836	0.049638534	0.014213696	0.889865256	0.011266296	0.889865256	0.317790195	0.889865256	3	TRUE
724	729	YDL143W	chrIV	+	TATA-less	TAF1-enriched	2745	200011	199961	-50	YDL143W	1999.7	0.003260537	0.003892417	1	1	1	0.041226833	1	1	0.205903211	2	TRUE
725	730	YDL141W	chrIV	+	TATA-less	TAF1-enriched	163	202840	202801	-39	YDL141W	275.5	0.001085868	0.321336843	0.083990504	0.229522546	0.804984079	0.12084284	0.242536853	0.074262139	0.058369143	0	FALSE
726	731	orphan	chrIV	-	TATA-less	TAF1-enriched	3044	NA	211104	NA	orphan	237	0.076049251	NA	NA	NA	NA	NA	NA	NA	NA	NA	NA
727	732	YDL139C	chrIV	-	TATA-less	TAF1-enriched	480	212017	212084	-67	YDL139C	213	0.001669127	0.532027862	0.917048533	0.509183321	0.410451146	0.168127211	0.713822136	0.338361443	0.713822136	0	FALSE
728	733	YDL138W	chrIV	+	TATA-less	TAF1-depleted	583	213262	213172	-90	YDL138W	159.5	0.00270918	0.022669503	0.339729917	0.754995448	0.191119164	0.202688128	0.463094362	0.10472722	0.754995448	1	TRUE
729	734	CUT479	chrIV	-	TATA-containing	TAF1-enriched	226	215550	215711	-161	CUT479	1227.1	0.000142632	0.003044608	1	1	1	0.000938427	1	1	1	2	TRUE
730	736	orphan	chrIV	+	TATA-less	TAF1-enriched	3378	216070	216051	-19	orphan	5419.8	0.001126696	0.064456963	0.189453429	0.128733967	0.731579205	0.049859557	0.503038443	0.184002282	0.883123362	1	TRUE
731	737	ANT109	chrIV	-	TATA-less	TAF1-depleted	135	216994	217171	-177	ANT109	24.5	0.048663569	0.184551937	0.651022774	0.728695805	0.753652779	0.076750714	0.116617011	0.109760681	0.804321806	0	FALSE
732	738	YDL136W	chrIV	+	TATA-less	TAF1-enriched	8604	NA	217567	NA	YDL136W	17267.6	0.093808707	NA	NA	NA	NA	NA	NA	NA	NA	NA	NA
733	740	YDL135C	chrIV	-	TATA-less	TAF1-enriched	1684	219325	219333	-8	YDL135C	1233.9	0.000236395	0.004184842	1	0.017689775	1	0.002384661	1	1	0.338834271	3	TRUE
734	741	orphan	chrIV	+	TATA-less	TAF1-depleted	7	221371	221294	-77	orphan	4.6	0.444325239	NA	NA	NA	NA	NA	NA	NA	NA	NA	NA
735	742	YDL133C-A	chrIV	-	TATA-containing	TAF1-enriched	666155	221750	221819	-69	YDL133C-A	165085.6	0.000716969	0.006648911	1	0.017389183	1	0.006403645	1	1	1	3	TRUE
736	743	YDL131W	chrIV	+	TATA-containing	TAF1-depleted	12395	227451	227357	-94	YDL131W	1398	0.000301778	0.062034681	0.130887818	0.511149311	0.155738544	0.236667826	0.060957052	0.170108285	0.239515323	0	FALSE
737	744	YDL130W-A	chrIV	+	TATA-less	TAF1-enriched	4841	229157	229106	-51	YDL130W-A	775	0.043412277	0.273176005	0.29457626	0.213552582	0.923773751	0.108315413	0.923773751	0.761741176	0.056789658	0	FALSE
738	745	YDL130W	chrIV	+	TATA-less	TAF1-enriched	23246	NA	229887	NA	YDL130W	156065	0.000143268	0.003943334	1	0.00918257	1	0.003676686	1	1	1	3	TRUE
739	746	orphan	chrIV	-	TATA-less	TAF1-enriched	19	230202	230243	-41	orphan	0.4	0.680697039	NA	NA	NA	NA	NA	NA	NA	NA	NA	NA
740	747	YDL129W	chrIV	+	TATA-less	TAF1-enriched	370	230936	230919	-17	YDL129W	1049.5	0.428304935	NA	NA	NA	NA	NA	NA	NA	NA	NA	NA
741	748	YDL128W	chrIV	+	TATA-less	TAF1-enriched	97192	232668	232601	-67	YDL128W	9998.7	0.007627077	0.075739765	0.383298861	1	0.25767357	0.293580671	0.023585567	0.143937095	0.479291954	1	TRUE
742	749	ANT110	chrIV	-	TATA-less	TAF1-enriched	7	NA	233911	NA	ANT110	39.8	0.008824232	0.068896165	0.746889459	0.065760032	0.231212397	0.010400463	0.612704849	0.942113607	0.035977502	2	TRUE
743	750	orphan	chrIV	+	TATA-less	TAF1-enriched	18	234739	234720	-19	orphan	121.7	0.001158305	0.550000228	0.263189758	0.022902598	0.378058568	0.003313143	0.378058568	0.819959613	0.022902598	3	TRUE
744	751	YDL127W	chrIV	+	TATA-containing	TAF1-depleted	228	234921	234873	-48	YDL127W	220.9	0.010530077	0.328845625	0.168854105	0.068265976	0.403919307	0.151799603	0.288446849	0.36275041	0.125639062	0	FALSE
745	752	YDL126C	chrIV	-	TATA-less	TAF1-enriched	21628	238665	238714	-49	YDL126C	21280.7	0.000315534	0.117090458	0.018740374	1	0.062923394	1	0.062923394	0.229963801	1	1	TRUE
746	753	orphan	chrIV	-	TATA-less	TAF1-enriched	8153	239546	239592	-46	orphan	4344	0.003882423	0.196644575	0.274087745	0.373334877	0.150046714	0.80487277	0.261350413	0.06313861	0.150046714	0	FALSE
747	754	YDL125C	chrIV	-	TATA-less	TAF1-depleted	1989	NA	239752	NA	YDL125C	2086.9	0.480571952	NA	NA	NA	NA	NA	NA	NA	NA	NA	NA
748	755	YDL124W	chrIV	+	TATA-containing	TAF1-depleted	32133	240229	240214	-15	YDL124W	2888.9	0.000251356	0.070208211	1	0.108884368	0.20313681	0.038474994	0.088681059	0.080171389	0.778727221	1	TRUE
749	756	orphan	chrIV	+	TATA-containing	TAF1-enriched	1292	241426	241388	-38	orphan	747.8	0.000388497	0.070163034	0.085106083	0.275974974	0.708422822	0.061730666	0.444742085	0.248286516	0.147862999	0	FALSE
750	757	YDL123W	chrIV	+	TATA-containing	TAF1-enriched	1915	241426	241391	-35	YDL123W	747.8	0.000388497	0.070163034	0.085106083	0.275974974	0.708422822	0.061730666	0.444742085	0.248286516	0.147862999	0	FALSE
751	758	YDL121C	chrIV	-	TATA-less	TAF1-enriched	533	245569	245601	-32	YDL121C	1657.3	0.000161379	0.131221104	0.090947532	0.321189798	0.643406855	0.032803653	0.233881746	0.02946805	1	2	TRUE
752	759	YDL120W	chrIV	+	TATA-less	TAF1-enriched	351	245880	245843	-37	YDL120W	3688.8	0.000230193	0.040586669	0.313174953	0.180502945	0.140716288	0.017442191	0.140716288	1	0.180502945	2	TRUE
753	760	YDL119C	chrIV	-	TATA-less	TAF1-enriched	97	247602	247756	-154	YDL119C	277.4	0.002914371	0.010993131	0.004817273	0.116902242	0.650074202	0.991801931	0.183801257	0.349778384	0.275548584	2	TRUE
754	761	CUT481	chrIV	-	TATA-less	TAF1-enriched	27	247965	248028	-63	CUT481	55.8	0.004096943	0.287676871	0.144375007	0.014370376	1	0.014421263	1	1	1	2	TRUE
755	762	YDL117W	chrIV	+	TATA-less	TAF1-depleted	57	248598	248278	-320	YDL117W	398.1	0.001216106	0.334063079	0.065364246	0.036447625	0.509694018	0.020215135	0.678051305	0.226873204	0.374957615	2	TRUE
756	763	YDL116W	chrIV	+	TATA-less	TAF1-enriched	994	251552	251508	-44	YDL116W	1007.5	0.00054038	0.034747986	0.05652507	0.830162576	0.830162576	0.029320066	0.830162576	0.781849711	0.830162576	2	TRUE
757	764	YDL115C	chrIV	-	TATA-less	TAF1-enriched	413	255116	255168	-52	YDL115C	869.6	0.00175128	0.040164133	1	0.214345123	1	0.00013667	1	1	1	2	TRUE
758	765	YDL112W	chrIV	+	TATA-less	TAF1-enriched	283	258896	258870	-26	YDL112W	996.3	0.000257204	0.014010014	0.231969653	0.045451592	1	0.012000239	1	1	1	3	TRUE
759	766	YDL111C	chrIV	-	TATA-less	TAF1-enriched	768	264117	264163	-46	YDL111C	1800.1	0.000190758	0.260734839	0.058204114	0.101575799	0.307130205	0.03454126	0.094982152	0.187355094	0.39025383	1	TRUE
760	767	orphan	chrIV	+	TATA-less	TAF1-enriched	45	264481	264464	-17	orphan	47.3	0.019066566	0.128719229	0.474137276	0.313405186	0.491408663	0.00528985	0.619858775	0.836337767	0.313405186	1	TRUE
761	768	YDL110C	chrIV	-	TATA-containing	TAF1-depleted	112	264944	265021	-77	YDL110C	1460.3	NA	NA	NA	NA	NA	NA	NA	NA	NA	NA	NA
762	769	YDL108W	chrIV	+	TATA-less	TAF1-enriched	98	267683	267675	-8	YDL108W	184.2	0.108864892	NA	NA	NA	NA	NA	NA	NA	NA	NA	NA
763	770	YDL106C	chrIV	-	TATA-less	TAF1-enriched	1218	271911	271950	-39	YDL106C	1582.6	0.002088993	0.19102454	0.053407136	0.883533998	0.15675291	0.817202063	0.087440084	0.570472198	0.025753111	1	TRUE
764	771	YDL105W	chrIV	+	TATA-less	TAF1-enriched	161	272407	272345	-62	YDL105W	240.4	0.001025714	0.110933328	0.107666325	0.179611973	0.909890573	0.010881104	0.428223098	0.661146386	0.179611973	1	TRUE
765	772	YDL104C	chrIV	-	TATA-less	TAF1-depleted	326	274710	274860	-150	YDL104C	98.3	0.001554743	0.137764568	0.214290364	0.078654989	0.219573575	0.023191172	0.219573575	0.184213093	0.894414585	1	TRUE
766	773	YDL103C	chrIV	-	TATA-less	TAF1-depleted	1605	276602	276648	-46	YDL103C	1975.8	0.00137674	1	0.003633608	0.732266485	0.016630107	0.658731711	0.416495389	0.658731711	0.732266485	2	TRUE
767	774	YDL102W	chrIV	+	TATA-less	TAF1-enriched	233	NA	276786	NA	YDL102W	1171.7	0.000909685	0.004391771	1	0.07456863	0.410523239	0.021336115	0.410523239	0.595261547	0.410523239	2	TRUE
768	775	YDL101C	chrIV	-	TATA-less	TAF1-enriched	96	281847	281869	-22	YDL101C	604.5	0.000245877	0.035040557	0.187694236	0.670884542	0.133796698	0.10414931	0.084745718	0.15022156	0.670884542	1	TRUE
769	776	orphan	chrIV	+	TATA-less	TAF1-enriched	0	282157	282140	-17	orphan	7.1	0.263049155	NA	NA	NA	NA	NA	NA	NA	NA	NA	NA
770	777	YDL100C	chrIV	-	TATA-less	TAF1-enriched	3824	283171	283212	-41	YDL100C	12928	0.000133552	1	0.017290281	1	0.009115787	1	0.009115787	0.000761281	1	4	TRUE
771	778	YDL097C	chrIV	-	TATA-less	TAF1-enriched	1571	NA	286705	NA	YDL097C	15628.3	0.000446064	0.046193263	0.058932637	1	1	0.017585165	1	1	1	2	TRUE
772	779	YDL095W	chrIV	+	TATA-less	TAF1-enriched	4147	287069	287026	-43	YDL095W	3145.6	0.002338375	0.128628098	0.088778193	0.424295162	0.739199765	0.212621776	0.549010281	0.156101961	0.125670326	0	FALSE
773	780	YDL093W	chrIV	+	TATA-less	TAF1-enriched	1100	289891	289880	-11	YDL093W	224.3	0.000278915	0.128795177	0.144480728	0.493274421	0.240205008	0.025598949	0.125191674	0.119148436	0.281658266	1	TRUE
774	781	CUT482	chrIV	-	TATA-less	TAF1-enriched	802	292522	292568	-46	CUT482	29.8	0.010671332	0.180581802	0.143716793	0.041352168	0.194228907	0.070836794	0.852873848	0.810780994	0.218422874	1	TRUE
775	782	YDL092W	chrIV	+	TATA-less	TAF1-enriched	822	292802	292758	-44	YDL092W	876.1	0.012010745	1	0.159332461	1	0.003128577	1	0.007929661	0.056478621	1	2	TRUE
776	783	YDL091C	chrIV	-	TATA-less	TAF1-enriched	406	294821	294851	-30	YDL091C	300.4	0.000213198	0.038352769	0.462404141	0.028123996	1	0.001821504	1	1	0.028123996	4	TRUE
777	784	YDL089W	chrIV	+	TATA-less	TAF1-enriched	76	296744	296598	-146	YDL089W	514.2	0.018668427	0.0763027	0.462600331	0.123708213	0.506217966	0.981982499	0.726442114	0.557088726	0.649238119	0	FALSE
778	785	YDL088C	chrIV	-	TATA-less	TAF1-depleted	1277	300075	300131	-56	YDL088C	309	0.000366709	0.141684077	0.176380235	0.263217893	0.514418629	0.014608165	0.112815872	0.35505764	0.132279838	1	TRUE
779	786	YDL087C	chrIV	-	TATA-less	TAF1-enriched	910	300979	301018	-39	YDL087C	208.2	0.005648386	0.383569222	0.05282995	0.5959179	0.5959179	0.028474755	0.111645675	0.648107939	0.5959179	1	TRUE
780	787	YDL086W	chrIV	+	TATA-containing	TAF1-enriched	283	301425	301403	-22	YDL086W	1703.6	0.000309512	0.111296082	0.141588121	0.158857946	0.107354707	0.041805731	0.107354707	0.298628909	1	1	TRUE
781	788	YDL086C-A	chrIV	-	TATA-less	TAF1-enriched	124	302130	302183	-53	YDL086C-A	104.4	0.051968563	NA	NA	NA	NA	NA	NA	NA	NA	NA	NA
782	789	YDL085C-A	chrIV	-	TATA-less	TAF1-enriched	601	302694	302726	-32	YDL085C-A	3012.5	0.00805808	0.055949117	0.537504602	1	1	0.367557706	1	1	0.00689723	1	TRUE
783	790	CUT483	chrIV	-	TATA-containing	TAF1-enriched	82	304804	304846	-42	CUT483	102.2	0.029802816	0.551821225	0.234020232	0.115632283	1	0.005341741	1	1	1	1	TRUE
784	791	YDL084W	chrIV	+	TATA-less	TAF1-enriched	943	305115	305093	-22	YDL084W	10526.6	0.000329911	0.198041277	0.029303262	0.105597831	0.961661782	0.036688185	0.242136689	0.803961243	0.105597831	2	TRUE
785	792	YDL083C	chrIV	-	TATA-less	TAF1-enriched	14846	307769	307807	-38	YDL083C	14688.1	0.000406109	0.014058066	1	0.022537216	0.682555617	0.003229511	0.682555617	0.597507206	0.070514297	3	TRUE
786	793	YDL082W	chrIV	+	TATA-less	TAF1-enriched	18514	308427	308386	-41	YDL082W	9379.6	0.000305795	1	0.003052828	1	0.20695319	1	0.002932891	1	1	2	TRUE
787	794	YDL081C	chrIV	-	TATA-less	TAF1-enriched	102114	310120	310180	-60	YDL081C	114327.8	0.000326929	0.10564984	0.102400891	0.525152733	0.108432521	0.076697186	0.108432521	0.120111859	1	0	FALSE
788	795	CUT054	chrIV	+	TATA-less	TAF1-depleted	11	NA	310432	NA	CUT054	32.2	0.008373118	0.565152296	0.079239751	0.026315226	0.633633653	0.008852881	0.3963156	0.609335702	0.24801078	2	TRUE
789	796	YDL080C	chrIV	-	TATA-less	TAF1-depleted	91	312457	312609	-152	YDL080C	387.6	0.096508714	NA	NA	NA	NA	NA	NA	NA	NA	NA	NA
790	797	ST0443	chrIV	+	TATA-less	TAF1-enriched	15	NA	312866	NA	ST0443	415.3	0.000835252	0.029860675	0.731645948	0.011077807	1	0.007910278	0.390522099	0.579394287	0.431214543	3	TRUE
791	798	YDL078C	chrIV	-	TATA-containing	TAF1-enriched	419	316375	316451	-76	YDL078C	1481.3	0.000187503	0.035771143	0.127484848	0.539672136	1	0.026325363	0.172911325	1	0.065779017	2	TRUE
792	799	YDL077C	chrIV	-	TATA-less	TAF1-enriched	313	320264	320254	10	YDL077C	374.5	0.104358473	NA	NA	NA	NA	NA	NA	NA	NA	NA	NA
793	800	YDL075W	chrIV	+	TATA-less	TAF1-enriched	5460	322257	322198	-59	YDL075W	95834.6	0.000218253	1	1	0.342960135	0.028636115	0.014341884	0.013128859	0.014341884	1	4	TRUE
794	801	orphan	chrIV	+	TATA-less	TAF1-depleted	171	322941	322861	-80	orphan	826.4	0.927488096	NA	NA	NA	NA	NA	NA	NA	NA	NA	NA
795	802	ST0447	chrIV	+	TATA-containing	TAF1-depleted	10	323918	323790	-128	ST0447	88	0.019448893	0.004862415	0.69210399	0.398951249	0.790933459	0.84379014	0.244088846	0.958644484	0.078528076	1	TRUE
796	803	YDL074C	chrIV	-	TATA-less	TAF1-enriched	203	326162	326228	-66	YDL074C	518.6	0.07918344	NA	NA	NA	NA	NA	NA	NA	NA	NA	NA
797	804	YDL073W	chrIV	+	TATA-less	TAF1-enriched	1222	326466	326433	-33	YDL073W	158.7	0.000753619	0.193465925	0.193465925	0.019404993	1	0.002545299	0.421645377	1	1	2	TRUE
798	805	YDL072C	chrIV	-	TATA-less	TAF1-enriched	23312	330440	330491	-51	YDL072C	4382.8	0.000133552	0.017290281	1	0.009115787	1	0.000761281	1	1	0.009115787	4	TRUE
799	806	ST0450	chrIV	+	TATA-less	TAF1-enriched	37	330853	330733	-120	ST0450	77.3	0.003353819	0.244315169	0.125539118	0.103566575	0.184926891	0.035598397	0.512804112	0.745202312	0.103566575	1	TRUE
800	807	YDL070W	chrIV	+	TATA-containing	TAF1-depleted	3505	331097	331005	-92	YDL070W	7754.7	0.000223515	0.00619111	1	0.033915344	0.421081511	0.000950297	1	1	0.033915344	4	TRUE
801	808	YDL067C	chrIV	-	TATA-less	TAF1-enriched	1969	334382	334442	-60	YDL067C	1673.2	0.000383183	0.022310259	0.125025857	1	1	0.635099331	0.441183073	0.016601914	1	2	TRUE
802	809	YDL066W	chrIV	+	TATA-less	TAF1-enriched	33255	334849	334811	-38	YDL066W	2788.2	0.000203393	0.104744956	0.081431285	0.166911136	0.236120055	0.074357228	0.236120055	0.251331996	0.166911136	0	FALSE
803	810	YDL065C	chrIV	-	TATA-less	TAF1-enriched	106	337252	337288	-36	YDL065C	339.5	0.000534401	0.199337926	0.116339118	0.585179476	0.159742474	0.03637991	0.380680128	0.069514932	0.240246089	1	TRUE
804	811	YDL063C	chrIV	-	TATA-less	TAF1-enriched	639	340189	340221	-32	YDL063C	1365.7	0.079598515	NA	NA	NA	NA	NA	NA	NA	NA	NA	NA
805	812	YDL061C	chrIV	-	TATA-less	TAF1-enriched	806	341196	341251	-55	YDL061C	988	0.000548753	0.251655385	0.064057918	0.07524313	0.371581674	0.059976153	0.189487081	0.731644294	0.027980272	1	TRUE
806	813	YDL060W	chrIV	+	TATA-less	TAF1-enriched	247	341625	341582	-43	YDL060W	1649.7	0.000217052	0.090417867	0.341824198	0.048060662	0.124162172	0.117616951	0.124162172	0.047150024	0.420602818	2	TRUE
807	814	YDL059C	chrIV	-	TATA-less	TAF1-enriched	229	345038	345056	-18	YDL059C	199.9	0.003943576	0.090031145	1	0.421671443	0.326057522	0.025348026	0.148080539	0.580091371	0.421671443	1	TRUE
808	815	YDL058W	chrIV	+	TATA-less	TAF1-enriched	2524	345667	345599	-68	YDL058W	1452.6	0.000154443	0.069279883	0.115400044	0.046593703	1	0.032284354	1	0.123212676	0.28854453	2	TRUE
809	816	YDL057W	chrIV	+	TATA-less	TAF1-enriched	208	351480	351426	-54	YDL057W	176.8	0.005959518	0.125506471	0.184897599	0.202359855	0.429099173	0.013958355	0.639794968	0.754660563	0.374778187	1	TRUE
810	817	CUT487	chrIV	-	TATA-less	TAF1-enriched	42	352579	352610	-31	CUT487	69.1	0.005032481	0.004211399	1	0.061949248	1	0.293513214	1	1	1	1	TRUE
811	818	YDL056W	chrIV	+	TATA-less	TAF1-enriched	611	352820	352765	-55	YDL056W	526.3	0.000247835	0.386347852	0.025069742	0.068113543	0.799807707	0.018517574	0.427480754	0.305638363	0.068113543	2	TRUE
812	819	YDL055C	chrIV	-	TATA-containing	TAF1-depleted	8385	356878	356908	-30	YDL055C	13704.5	NA	NA	NA	NA	NA	NA	NA	NA	NA	NA	NA
813	820	orphan	chrIV	-	TATA-less	TAF1-enriched	63	357580	357592	-12	orphan	13.3	0.075707768	NA	NA	NA	NA	NA	NA	NA	NA	NA	NA
814	821	orphan	chrIV	+	TATA-less	TAF1-enriched	32	358429	358435	6	orphan	21.6	0.021891082	0.150924487	0.096976027	0.088292904	0.773002955	0.830231867	0.773002955	0.709605296	0.773002955	0	FALSE
815	822	YDL054C	chrIV	-	TATA-less	TAF1-enriched	5170	361317	361363	-46	YDL054C	1706.8	0.001661257	0.005247821	1	0.031209734	0.758257537	0.691124831	0.031209734	0.691124831	0.758257537	3	TRUE
816	823	YDL053C	chrIV	-	TATA-containing	TAF1-depleted	253	362406	362454	-48	YDL053C	589.1	0.036172347	1	0.132042868	1	0.138215657	1	0.000967923	0.279962266	1	1	TRUE
817	824	YDL052C	chrIV	-	TATA-less	TAF1-enriched	472	363581	363619	-38	YDL052C	762.6	0.001778906	0.17224915	0.230135104	0.096992042	0.657288922	0.003658063	0.366127749	0.750332517	0.172617435	1	TRUE
818	825	YDL051W	chrIV	+	TATA-less	TAF1-enriched	1490	364097	363929	-168	YDL051W	4900.6	0.000293492	0.519264756	0.049677318	0.027368345	0.331678563	0.004396418	0.185591341	0.909294157	0.225735495	3	TRUE
819	826	YDL049C	chrIV	-	TATA-less	TAF1-depleted	65	NA	365940	NA	YDL049C	186.1	0.120776826	NA	NA	NA	NA	NA	NA	NA	NA	NA	NA
820	827	orphan	chrIV	-	TATA-less	TAF1-enriched	237	366538	366759	-221	orphan	85.8	0.009840248	0.104194709	0.036699466	0.968307867	0.842534003	0.024666137	0.071267146	0.766089488	0.37776578	2	TRUE
821	828	CUT489	chrIV	-	TATA-less	TAF1-enriched	1981	368155	368261	-106	CUT489	7256	0.000615093	0.003682075	1	0.107755625	0.513144064	0.037858067	0.513144064	0.398532106	0.107755625	2	TRUE
822	829	orphan	chrIV	+	TATA-less	TAF1-enriched	26	369002	368859	-143	orphan	13.9	0.089468823	NA	NA	NA	NA	NA	NA	NA	NA	NA	NA
823	830	YDL047W	chrIV	+	TATA-less	TAF1-enriched	2375	369799	369626	-173	YDL047W	1420.4	0.000732907	0.01414939	0.651988457	0.235735352	1	0.000831359	1	1	1	2	TRUE
824	831	YDL046W	chrIV	+	TATA-containing	TAF1-enriched	18279	371227	371178	-49	YDL046W	1787.2	0.001077873	0.535521712	0.021370819	0.152660893	0.405261805	0.064837839	0.177210585	0.159056528	0.865258483	1	TRUE
825	832	ST4129	chrIV	-	TATA-containing	TAF1-enriched	102	371965	372002	-37	ST4129	297.8	0.000817217	0.208296835	0.280805899	0.010473036	0.324849541	0.013997079	0.324849541	0.93247143	0.056982361	2	TRUE
826	833	YDL045W-A	chrIV	+	TATA-containing	TAF1-enriched	7257	372254	372204	-50	YDL045W-A	254.3	0.003291816	0.042361245	0.042361245	1	1	1	1	1	1	2	TRUE
827	834	YDL045C	chrIV	-	TATA-less	TAF1-enriched	116	373700	373759	-59	YDL045C	2675.7	0.007096647	0.008458057	1	0.0714134	1	0.041697766	1	1	1	2	TRUE
828	835	orphan	chrIV	-	TATA-less	TAF1-enriched	102	NA	375299	NA	orphan	197.5	0.003220096	0.014240901	0.144327608	0.423942507	0.789828456	0.730776262	0.789828456	0.730776262	0.789828456	1	TRUE
829	836	YDL043C	chrIV	-	TATA-less	TAF1-enriched	287	376463	376518	-55	YDL043C	173.1	0.000461818	0.695942302	0.022330492	0.079502485	0.536932822	0.051773975	0.536932822	0.095183124	0.079502485	1	TRUE
830	837	YDL042C	chrIV	-	TATA-less	TAF1-enriched	974	378454	378492	-38	YDL042C	700.8	0.007996319	0.047604321	0.113032935	0.415799069	0.415799069	0.726208066	0.415799069	0.726208066	0.415799069	1	TRUE
831	838	YDL040C	chrIV	-	TATA-less	TAF1-enriched	12373	381428	381484	-56	YDL040C	1182	0.000442385	0.109772962	0.109772962	0.153454641	0.97411981	0.02504618	0.495697092	0.13161754	0.314563457	1	TRUE
832	839	ST0462	chrIV	+	TATA-less	TAF1-enriched	42	381860	381672	-188	ST0462	13.1	0.14218094	NA	NA	NA	NA	NA	NA	NA	NA	NA	NA
833	840	YDL037C	chrIV	-	TATA-less	TAF1-enriched	1564	385748	385765	-17	YDL037C	104.4	0.002710612	0.05501447	0.857243691	0.0907659	0.986898462	0.028995256	0.45993818	0.340094473	0.0907659	1	TRUE
834	841	orphan	chrIV	+	TATA-less	TAF1-enriched	11	NA	387245	NA	orphan	76.7	0.004361155	0.251399966	0.005687694	0.160699393	0.039709927	0.697390625	0.529864112	0.417354132	0.100241947	2	TRUE
835	842	YDL036C	chrIV	-	TATA-less	TAF1-enriched	10	388842	388886	-44	YDL036C	602.1	0.000260101	0.159544768	0.032997317	0.273595505	0.490614926	0.025744693	0.490614926	0.37350743	0.208748005	2	TRUE
836	843	YDL035C	chrIV	-	TATA-less	TAF1-enriched	244	392281	392350	-69	YDL035C	141.8	0.066881588	NA	NA	NA	NA	NA	NA	NA	NA	NA	NA
837	844	YDL033C	chrIV	-	TATA-less	TAF1-enriched	137	393905	393947	-42	YDL033C	307.5	0.001506458	0.060686908	0.039554939	0.827266161	0.827266161	0.152141093	0.827266161	0.778168345	0.512707658	1	TRUE
838	845	YDL031W	chrIV	+	TATA-less	TAF1-enriched	219	394210	394144	-66	YDL031W	791.7	0.000980964	0.065052543	0.511400713	0.047910004	0.300117198	0.053027391	0.300117198	0.180992512	0.133974716	1	TRUE
839	846	YDL030W	chrIV	+	TATA-less	TAF1-enriched	154	397484	397458	-26	YDL030W	210.7	0.005178019	0.649879663	0.009768852	0.146081159	0.59230065	0.489355621	0.59230065	0.166766641	0.59230065	1	TRUE
840	847	YDL029W	chrIV	+	TATA-less	TAF1-enriched	1010	399386	399312	-74	YDL029W	1238.7	0.000588883	0.002395353	1	1	1	0.368438988	1	1	0.008005143	2	TRUE
841	848	YDL028C	chrIV	-	TATA-less	TAF1-enriched	360	403412	403415	-3	YDL028C	254.6	0.000726905	0.031418575	0.18169413	0.055086415	0.53675762	0.022166565	1	0.690085673	0.298165054	2	TRUE
842	849	YDL027C	chrIV	-	TATA-less	TAF1-enriched	968	404954	404990	-36	YDL027C	570.9	0.000281792	0.011467506	0.673497059	1	1	0.00087781	1	1	0.045485743	3	TRUE
843	850	YDL025W-A	chrIV	+	TATA-containing	TAF1-enriched	165	405428	405225	-203	YDL025W-A	44.9	0.175147439	NA	NA	NA	NA	NA	NA	NA	NA	NA	NA
844	851	YDL025C	chrIV	-	TATA-less	TAF1-enriched	1107	407226	407353	-127	YDL025C	653.9	0.000718848	0.022576389	0.558715302	0.22357814	0.404996397	0.025562221	0.564273114	0.057169361	0.063221443	2	TRUE
845	852	ST0466	chrIV	+	TATA-less	TAF1-enriched	89	407798	407607	-191	ST0466	25.4	0.031882968	0.01195326	1	0.108536375	0.149335647	0.143788928	0.677806989	0.38272367	0.552061054	1	TRUE
846	853	orphan	chrIV	-	TATA-containing	TAF1-depleted	3	408042	408073	-31	orphan	19.2	0.066257678	NA	NA	NA	NA	NA	NA	NA	NA	NA	NA
847	854	orphan	chrIV	-	TATA-less	TAF1-enriched	58	411087	411168	-81	orphan	19.8	0.122245999	NA	NA	NA	NA	NA	NA	NA	NA	NA	NA
848	855	YDL022W	chrIV	+	TATA-containing	TAF1-depleted	53299	411894	411751	-143	YDL022W	899.4	0.417497497	NA	NA	NA	NA	NA	NA	NA	NA	NA	NA
849	856	CUT491	chrIV	-	TATA-less	TAF1-enriched	158	414719	414759	-40	CUT491	59.9	0.017337895	0.395385395	0.117864447	0.168235988	0.628297193	0.531969334	0.39170537	0.348499398	0.168235988	0	FALSE
850	857	YDL020C	chrIV	-	TATA-containing	TAF1-enriched	41	NA	416952	NA	YDL020C	619.2	0.001115494	0.188003834	0.193013806	0.112286784	0.098368667	0.006963253	0.456037903	0.966627278	0.538056668	1	TRUE
851	858	CUT057	chrIV	+	TATA-less	TAF1-enriched	3	417303	417268	-35	CUT057	17.9	0.144727509	NA	NA	NA	NA	NA	NA	NA	NA	NA	NA
852	859	YDL019C	chrIV	-	TATA-less	TAF1-enriched	577	421489	421645	-156	YDL019C	267.8	0.010731173	0.144741866	0.547583734	0.119618413	0.980290745	0.019901124	0.603905508	0.476289888	0.119618413	1	TRUE
853	860	YDL018C	chrIV	-	TATA-less	TAF1-depleted	347	423520	423570	-50	YDL018C	721.1	0.112900472	NA	NA	NA	NA	NA	NA	NA	NA	NA	NA
854	861	CUT059	chrIV	+	TATA-containing	TAF1-enriched	15	423951	423834	-117	CUT059	27.4	0.005284983	0.295499967	0.017629222	0.965892479	0.467270112	0.220380023	0.965892479	0.732153843	0.102374431	1	TRUE
855	862	YDL017W	chrIV	+	TATA-less	TAF1-enriched	130	424132	424123	-9	YDL017W	194.1	0.007761071	0.126973043	0.074993213	0.163566568	0.755484531	0.049084049	0.163566568	0.687657465	0.385018777	1	TRUE
856	863	YDL015C	chrIV	-	TATA-less	TAF1-enriched	6636	426933	426987	-54	YDL015C	9884.7	0.000213787	1	0.002624896	0.054543078	1	0.013067121	1	0.375399186	0.054543078	2	TRUE
857	864	CUT492	chrIV	-	TATA-less	TAF1-enriched	73	NA	428712	NA	CUT492	18.2	0.037844973	0.010668445	0.565623099	0.227724244	0.958173881	0.651717668	0.958173881	0.651717668	0.958173881	1	TRUE
858	865	YDL013W	chrIV	+	TATA-less	TAF1-enriched	33	428960	428932	-28	YDL013W	247.2	0.000602072	0.039634094	1	0.0485886	0.059931123	0.010894064	0.233818054	0.716062983	0.778142438	3	TRUE
859	866	YDL012C	chrIV	-	TATA-containing	TAF1-enriched	26002	431486	431530	-44	YDL012C	5007.3	0.000714986	1	0.003952805	0.493969106	0.352603348	0.377207857	0.070842321	0.029730084	0.493969106	2	TRUE
860	867	orphan	chrIV	-	TATA-less	TAF1-enriched	442	431721	431837	-116	orphan	236.7	0.006365028	0.122118493	0.009561581	0.024970112	0.191413025	0.031980925	0.550670715	0.63200821	0.054947097	3	TRUE
861	868	orphan	chrIV	-	TATA-less	TAF1-depleted	491	431749	432014	-265	orphan	228	0.004689559	0.209571217	0.009375185	0.021204875	0.134709825	0.016833419	0.68008188	0.594488201	0.040797085	4	TRUE
862	869	YDL010W	chrIV	+	TATA-less	TAF1-depleted	120	NA	432302	NA	YDL010W	377.4	0.053238223	NA	NA	NA	NA	NA	NA	NA	NA	NA	NA
863	870	YDL008W	chrIV	+	TATA-less	TAF1-enriched	218	433561	433476	-85	YDL008W	512.2	0.0009855	0.046651336	0.171972736	0.201708093	0.902916655	0.014442136	0.510101441	0.874872421	0.058129407	2	TRUE
864	871	ST4152	chrIV	-	TATA-less	TAF1-enriched	84	433902	434058	-156	ST4152	255.6	0.020060533	0.42881735	0.141111716	0.231659847	0.456034801	0.139671931	0.456034801	0.335900493	0.231659847	0	FALSE
865	872	tT(AGU)D	chrIV	-	TATA-less	-	161	434302	434347	-45	tT(AGU)D	195.2	0.066881588	NA	NA	NA	NA	NA	NA	NA	NA	NA	NA
866	873	YDL007W	chrIV	+	TATA-less	TAF1-enriched	372	438050	438009	-41	YDL007W	2362.9	0.000378596	0.068204169	0.172556545	0.325796625	0.384888368	0.018330353	0.175044432	0.419516719	0.325796625	1	TRUE
867	874	YDL006W	chrIV	+	TATA-less	TAF1-depleted	191	439787	439622	-165	YDL006W	256.3	0.000721076	0.062446506	0.122857552	0.234877105	0.604314093	0.110642427	0.311300922	0.328187089	0.144578584	0	FALSE
868	875	YDL005C	chrIV	-	TATA-less	TAF1-depleted	419	442309	442334	-25	YDL005C	162.6	0.005213364	0.717736812	0.002346219	0.993417741	0.442947712	0.502238011	0.302439311	0.22065391	0.569199046	1	TRUE
869	876	YDL004W	chrIV	+	TATA-less	TAF1-enriched	1304	443014	442986	-28	YDL004W	4212.8	0.00020547	0.059748861	0.078207689	0.258073664	1	0.048225919	0.23111847	0.169388289	1	1	TRUE
870	877	orphan	chrIV	-	TATA-less	TAF1-enriched	0	443825	443829	-4	orphan	26.8	0.019841449	0.005137206	0.025179248	0.833872985	0.710583112	0.631900734	0.639874172	0.588136485	0.467831095	2	TRUE
871	878	ST4154	chrIV	-	TATA-less	TAF1-depleted	32	444234	444250	-16	ST4154	74.3	0.000666866	0.059270694	1	0.055728291	1	0.000142607	1	1	0.017677183	2	TRUE
872	879	YDL003W	chrIV	+	TATA-containing	TAF1-depleted	156	444683	444559	-124	YDL003W	396	0.00267876	1	0.003098235	1	1	1	0.137528178	0.076401138	1	1	TRUE
873	880	YDL002C	chrIV	-	TATA-less	TAF1-enriched	287	447458	447663	-205	YDL002C	1262.8	0.000855909	0.185924703	0.059094022	0.388205894	0.138462457	0.039418712	0.708065512	0.283751009	0.388205894	1	TRUE
874	881	YDL001W	chrIV	+	TATA-less	TAF1-enriched	1416	447956	447926	-30	YDL001W	242.7	0.004171379	0.072320072	0.121742482	0.084970948	0.396660101	0.377528949	0.603413845	0.715298416	0.777534282	0	FALSE
875	882	YDR001C	chrIV	-	TATA-containing	TAF1-depleted	2986	452502	452594	-92	YDR001C	4520.6	0.001099964	0.027246575	0.616742404	0.160661617	0.05500451	0.058180025	0.180782041	0.133920935	0.214383169	1	TRUE
876	883	YDR002W	chrIV	+	TATA-less	TAF1-enriched	1185	453055	453016	-39	YDR002W	10498.6	0.000204406	0.376909692	0.051903877	0.15106547	0.252045122	0.011734217	0.252045122	0.139220518	0.357811452	1	TRUE
877	884	YDR003W	chrIV	+	TATA-less	TAF1-depleted	141	454106	454085	-21	YDR003W	906.3	0.192984495	NA	NA	NA	NA	NA	NA	NA	NA	NA	NA
878	885	YDR004W	chrIV	+	TATA-less	TAF1-enriched	77	455304	455240	-64	YDR004W	229.2	0.009468857	0.698218714	0.020808329	0.382135024	0.094046713	0.479877895	0.477325649	0.590727011	0.094046713	1	TRUE
879	886	YDR005C	chrIV	-	TATA-less	TAF1-depleted	1900	458177	458211	-34	YDR005C	728.6	0.000146961	0.003922072	1	0.019792956	1	0.002036735	1	1	1	3	TRUE
880	887	YDR006C	chrIV	-	TATA-less	TAF1-enriched	2574	461164	461286	-122	YDR006C	353.1	0.002124218	0.031882724	0.263980508	0.273585607	0.318163563	0.026142885	0.948649736	1	0.246356297	2	TRUE
881	888	YDR007W	chrIV	+	TATA-containing	TAF1-depleted	99	NA	461632	NA	YDR007W	32.8	0.019623411	0.117525509	0.176885364	0.405349894	0.873119885	0.110692722	0.584838213	0.536243672	0.873119885	0	FALSE
882	889	orphan	chrIV	+	TATA-less	TAF1-enriched	4	465173	464986	-187	orphan	1.3	0.354744701	NA	NA	NA	NA	NA	NA	NA	NA	NA	NA
883	890	YDR011W	chrIV	+	TATA-less	TAF1-depleted	129	465744	465594	-150	YDR011W	388.8	0.000701397	0.013225122	0.453366259	0.353139144	1	0.010503805	1	0.595973878	0.063306147	2	TRUE
884	891	YDR012W	chrIV	+	TATA-less	TAF1-depleted	41561	471866	471815	-51	YDR012W	12581.5	0.00014504	0.021846776	0.077316074	1	1	0.01166251	1	1	1	2	TRUE
885	892	YDR013W	chrIV	+	TATA-less	TAF1-enriched	1465	473187	473141	-46	YDR013W	616.1	0.052170582	NA	NA	NA	NA	NA	NA	NA	NA	NA	NA
886	893	YDR016C	chrIV	-	TATA-less	TAF1-enriched	138	478749	478791	-42	YDR016C	1272.5	0.000995812	0.072147013	0.17252237	0.269689816	0.386467931	0.15416582	0.148907571	0.14792695	0.386467931	0	FALSE
887	894	orphan	chrIV	+	TATA-less	TAF1-enriched	3	481789	481738	-51	orphan	0.9	0.611312759	NA	NA	NA	NA	NA	NA	NA	NA	NA	NA
888	895	orphan	chrIV	+	TATA-less	TAF1-enriched	149	481986	481984	-2	orphan	28.8	0.036159611	0.080081592	0.751358274	0.394659224	0.513846017	0.085853917	0.442155948	0.138082094	0.442155948	0	FALSE
889	896	CUT062	chrIV	+	TATA-less	TAF1-enriched	21	NA	482589	NA	CUT062	14.9	0.012167336	0.464295524	0.049855394	0.10197748	0.031682802	0.619360498	0.923364464	0.071743281	0.585675231	2	TRUE
890	897	YDR019C	chrIV	-	TATA-containing	TAF1-enriched	289	485241	485290	-49	YDR019C	1111.3	0.000975809	0.117307133	1	0.031986724	0.261956642	0.006409885	0.209932012	0.733287848	0.530740387	2	TRUE
891	898	YDR020C	chrIV	-	TATA-less	TAF1-depleted	210	486500	486566	-66	YDR020C	245.6	0.000907925	0.005427621	0.441850039	0.475929128	0.36425712	0.241479249	0.399520928	0.20949273	0.475929128	1	TRUE
892	899	YDR022C	chrIV	-	TATA-less	TAF1-enriched	346	488836	488881	-45	YDR022C	75.7	NA	NA	NA	NA	NA	NA	NA	NA	NA	NA	NA
893	900	tV(UAC)D	chrIV	+	TATA-less	-	0	489139	488883	-256	tV(UAC)D	0.2	0.367879441	NA	NA	NA	NA	NA	NA	NA	NA	NA	NA
894	901	ST4168	chrIV	-	TATA-containing	TAF1-enriched	208	489142	489210	-68	ST4168	120.2	0.01181358	0.336139432	0.063267079	0.484310065	0.862984663	0.366576299	0.592031734	0.103118517	0.484310065	0	FALSE
895	902	YDR023W	chrIV	+	TATA-containing	TAF1-enriched	3496	489534	489474	-60	YDR023W	11888.5	0.000296019	0.094497359	0.134621773	0.068197422	0.195851556	0.083258988	0.099567533	0.412576449	0.38999327	0	FALSE
896	903	YDR025W	chrIV	+	TATA-less	TAF1-enriched	118633	491537	491501	-36	YDR025W	17171.3	0.000214569	0.211623688	0.150865765	0.864190848	0.005590534	0.825237187	0.005590534	0.015142409	0.093697014	3	TRUE
897	904	YDR027C	chrIV	-	TATA-less	TAF1-enriched	65	497394	497440	-46	YDR027C	213.2	0.000729649	0.042148232	0.34654144	0.06205334	0.41313823	0.047002938	0.169167314	0.526134894	0.623405151	2	TRUE
898	905	YDR028C	chrIV	-	TATA-less	TAF1-enriched	1857	501327	501373	-46	YDR028C	1866.2	0.003393136	0.418299848	0.685707468	0.085826479	0.566907366	0.026574126	0.085826479	0.026574126	0.566907366	2	TRUE
899	906	CUT064	chrIV	+	TATA-less	TAF1-enriched	21	501563	501508	-55	CUT064	61.8	0.067085623	NA	NA	NA	NA	NA	NA	NA	NA	NA	NA
900	907	YDR032C	chrIV	-	TATA-containing	TAF1-depleted	31578	504644	504757	-113	YDR032C	2510.4	0.001012921	0.189854027	0.00516077	1	1	1	1	1	1	1	TRUE
901	908	orphan	chrIV	+	TATA-less	TAF1-enriched	32	506263	506130	-133	orphan	4.3	0.076853304	NA	NA	NA	NA	NA	NA	NA	NA	NA	NA
902	909	ST0505	chrIV	+	TATA-less	TAF1-enriched	133	506443	506361	-82	ST0505	80.8	0.159644733	NA	NA	NA	NA	NA	NA	NA	NA	NA	NA
903	910	YDR033W	chrIV	+	TATA-containing	TAF1-depleted	18301	508209	507901	-308	YDR033W	4365.2	0.000707967	0.126506233	0.178734299	0.115617925	0.461425312	0.008379974	0.461425312	0.634494817	0.115617925	1	TRUE
904	911	YDR034C	chrIV	-	TATA-less	TAF1-enriched	475	512208	512248	-40	YDR034C	88.1	0.000769256	0.11516691	0.084706124	0.397220968	0.142849894	0.178570872	0.695992313	0.07747415	0.397220968	0	FALSE
905	912	orphan	chrIV	+	TATA-less	TAF1-depleted	15	NA	512559	NA	orphan	473.6	0.001916523	0.010178435	0.405514559	0.169148857	0.108990924	0.406677489	0.332966606	0.841823731	0.392963689	1	TRUE
906	913	orphan	chrIV	-	TATA-less	TAF1-enriched	1483	512715	512744	-29	orphan	60.2	0.122536593	NA	NA	NA	NA	NA	NA	NA	NA	NA	NA
907	914	tL(UAA)D	chrIV	+	TATA-less	-	229	519755	519731	-24	tL(UAA)D	50.7	NA	NA	NA	NA	NA	NA	NA	NA	NA	NA	NA
908	915	orphan	chrIV	+	TATA-less	TAF1-enriched	35	NA	519996	NA	orphan	372.7	0.002428014	0.33668233	0.043034076	0.892183823	0.288957098	0.026896061	0.158178191	0.585384998	0.904803692	2	TRUE
909	916	tQ(UUG)D1	chrIV	+	TATA-less	-	592	520976	520961	-15	tQ(UUG)D1	19	0.667849438	NA	NA	NA	NA	NA	NA	NA	NA	NA	NA
910	917	YDR035W	chrIV	+	TATA-less	TAF1-depleted	24556	521895	521737	-158	YDR035W	1910.2	0.001203848	0.147352755	0.164588089	0.049084811	0.667775662	0.017634048	0.281455237	0.608455302	0.186834686	2	TRUE
911	918	YDR036C	chrIV	-	TATA-less	TAF1-enriched	2369	524735	524764	-29	YDR036C	383.4	0.010591471	0.538052004	0.083630931	0.198853645	0.028947443	1	0.058077032	0.933903176	0.403641209	1	TRUE
912	919	YDR037W	chrIV	+	TATA-containing	TAF1-enriched	5852	525452	525391	-61	YDR037W	7199.9	0.003129073	0.483235529	0.047547266	0.024196932	0.652135453	0.023620621	0.432616759	0.965614311	0.079584559	3	TRUE
913	920	YDR041W	chrIV	+	TATA-less	TAF1-enriched	260	539830	539798	-32	YDR041W	779.5	0.002549689	0.138829445	0.15532909	0.183656809	0.770394474	0.015174344	0.495868828	0.706330952	0.183656809	1	TRUE
914	921	orphan	chrIV	-	TATA-containing	TAF1-enriched	8761	541520	541700	-180	orphan	2823.5	0.191371775	NA	NA	NA	NA	NA	NA	NA	NA	NA	NA
915	922	ST0511	chrIV	+	TATA-less	TAF1-enriched	36	542397	542304	-93	ST0511	55.4	0.022645819	0.043985314	0.669838251	0.178681779	0.034183712	0.553460879	0.034183712	0.126453463	0.567490058	3	TRUE
916	923	CUT065	chrIV	+	TATA-containing	TAF1-enriched	982	542870	542709	-161	CUT065	159.8	0.018232609	0.021680233	0.149214612	0.039052067	0.722823526	0.032048581	0.722823526	0.453681964	0.22046787	3	TRUE
917	924	YDR043C	chrIV	-	TATA-containing	TAF1-depleted	1607	543414	543534	-120	YDR043C	623.4	0.001209878	0.017762602	0.213305207	0.115417828	0.485248423	0.008816459	0.139696611	0.367605818	0.042484913	3	TRUE
918	925	ST0513	chrIV	+	TATA-less	TAF1-enriched	230	544094	544085	-9	ST0513	96.4	0.021165478	0.694460032	0.055019227	0.022867995	0.358342425	0.01720429	0.660968423	0.363848456	0.223821474	2	TRUE
919	926	orphan	chrIV	-	TATA-less	TAF1-enriched	124	545570	545670	-100	orphan	33.6	0.110871377	NA	NA	NA	NA	NA	NA	NA	NA	NA	NA
920	927	YDR044W	chrIV	+	TATA-containing	TAF1-depleted	2966	546701	546492	-209	YDR044W	10429.8	0.001319694	0.003776406	0.026894962	0.14089809	0.499539747	0.007881547	0.499539747	0.941394979	0.357955728	3	TRUE
921	928	YDR045C	chrIV	-	TATA-less	TAF1-enriched	208	548406	548465	-59	YDR045C	306	0.000165514	1	0.006996957	1	0.002724532	1	0.006138009	1	1	3	TRUE
922	929	YDR046C	chrIV	-	TATA-less	TAF1-depleted	1019	550661	550666	-5	YDR046C	1128.2	0.000136601	0.004012484	1	0.02436784	1	0.003656262	1	1	0.02436784	4	TRUE
923	930	orphan	chrIV	+	TATA-less	TAF1-depleted	347	551494	551451	-43	orphan	128.8	0.066953561	NA	NA	NA	NA	NA	NA	NA	NA	NA	NA
924	931	YDR047W	chrIV	+	TATA-less	TAF1-enriched	555	NA	551715	NA	YDR047W	1201.8	0.000451367	0.001886735	1	1	1	1	0.121786358	1	1	1	TRUE
925	932	YDR049W	chrIV	+	TATA-less	TAF1-enriched	48	553244	553226	-18	YDR049W	264.1	0.000389714	0.22221521	0.233698068	0.104688776	0.088368055	0.036199084	0.088368055	0.121783822	0.607484855	1	TRUE
926	933	CUT496	chrIV	-	TATA-containing	TAF1-depleted	50	NA	555780	NA	CUT496	1405.8	0.849071548	NA	NA	NA	NA	NA	NA	NA	NA	NA	NA
927	935	YDR050C	chrIV	-	TATA-less	TAF1-depleted	4037	556408	556502	-94	YDR050C	54535.7	NA	NA	NA	NA	NA	NA	NA	NA	NA	NA	NA
928	936	ST0517	chrIV	+	TATA-less	TAF1-enriched	100	557047	557014	-33	ST0517	62.2	0.001363657	0.587387229	0.207222692	0.040527731	0.20153389	0.076180432	0.390067426	0.811483327	0.090095874	1	TRUE
929	937	YDR051C	chrIV	-	TATA-less	TAF1-enriched	69	558054	558106	-52	YDR051C	271.1	0.007975822	0.449140021	0.079107041	0.008174214	0.357422962	0.351749205	0.043938013	0.1545735	0.460582799	2	TRUE
930	938	YDR052C	chrIV	-	TATA-less	TAF1-enriched	31	560727	560779	-52	YDR052C	320.5	0.001061119	0.116683124	0.266984082	0.295678974	0.208929381	0.028721285	0.208929381	0.262795041	0.191840384	1	TRUE
931	939	YDR054C	chrIV	-	TATA-less	TAF1-enriched	491	562435	562439	-4	YDR054C	1392.3	0.003894779	0.3017359	0.033335018	0.198599419	0.440510604	0.096986768	0.440510604	0.73994353	0.198599419	1	TRUE
932	940	orphan	chrIV	+	TATA-less	TAF1-enriched	19	562729	562671	-58	orphan	8.8	0.131057276	NA	NA	NA	NA	NA	NA	NA	NA	NA	NA
933	941	CUT066	chrIV	+	TATA-less	TAF1-enriched	142	563261	563233	-28	CUT066	87.4	NA	NA	NA	NA	NA	NA	NA	NA	NA	NA	NA
934	942	YDR055W	chrIV	+	TATA-containing	TAF1-depleted	46851	563595	563466	-129	YDR055W	5746.4	0.000140571	0.003028431	1	1	1	0.000932311	1	1	1	2	TRUE
935	943	YDR056C	chrIV	-	TATA-containing	TAF1-enriched	2086	565664	565690	-26	YDR056C	1093.6	0.000367312	0.006364679	1	0.08019874	0.79861467	0.001617772	0.79861467	0.741864835	0.144855681	2	TRUE
936	944	YDR057W	chrIV	+	TATA-less	TAF1-enriched	763	565944	565899	-45	YDR057W	185.6	0.000546514	0.165124634	0.067095693	0.104020943	0.386817225	0.007286824	0.587895439	0.445926734	0.161751761	1	TRUE
937	945	tR(UCU)D	chrIV	+	TATA-less	-	142	568865	568871	6	tR(UCU)D	1.1	0.734482117	NA	NA	NA	NA	NA	NA	NA	NA	NA	NA
938	946	YDR059C	chrIV	-	TATA-containing	TAF1-enriched	5277	569797	569829	-32	YDR059C	215.8	0.000562839	0.101120432	0.059791664	0.212335633	0.629636474	0.027022862	0.629636474	0.533568886	0.212335633	1	TRUE
939	947	YDR061W	chrIV	+	TATA-less	TAF1-enriched	366	574249	574146	-103	YDR061W	564.2	0.000795642	0.044667679	0.437318818	0.385987075	0.167387588	0.028026112	0.10840509	0.740183262	0.335426118	2	TRUE
940	948	ST4195	chrIV	-	TATA-less	TAF1-enriched	1651	575825	575830	-5	ST4195	81.3	0.040282419	0.484499199	0.526377566	0.000958099	0.125616854	0.322832046	1	1	1	1	TRUE
941	949	YDR062W	chrIV	+	TATA-less	TAF1-enriched	785	576184	576107	-77	YDR062W	1392.3	0.000227232	0.17678759	0.029788966	0.094400819	0.318695198	0.014284286	0.541098929	0.533356865	0.221592655	2	TRUE
942	950	CUT499	chrIV	-	TATA-less	TAF1-enriched	218	579077	579079	-2	CUT499	44.3	0.003695423	0.034344631	1	0.264262748	0.831289387	0.012510788	0.318732739	0.198022507	0.186535149	2	TRUE
943	951	YDR064W	chrIV	+	TATA-less	TAF1-enriched	10518	579493	579429	-64	YDR064W	54185.2	0.000204854	0.009169816	1	0.354582875	1	0.000228742	1	1	0.037259667	3	TRUE
944	952	YDR068W	chrIV	+	TATA-less	TAF1-enriched	51	583706	583673	-33	YDR068W	611.7	0.00447673	0.002662315	1	1	1	1	1	1	1	1	TRUE
945	953	YDR069C	chrIV	-	TATA-less	TAF1-enriched	82	587737	587766	-29	YDR069C	376.2	0.000501033	0.03815171	0.213524354	0.11939319	0.299168996	0.044378427	0.299168996	0.900004096	0.11939319	2	TRUE
946	954	CUT067	chrIV	+	TATA-less	TAF1-enriched	61	588035	588013	-22	CUT067	25.2	0.198739087	NA	NA	NA	NA	NA	NA	NA	NA	NA	NA
947	955	YDR071C	chrIV	-	TATA-less	TAF1-depleted	1739	589269	589465	-196	YDR071C	3257.2	0.041170301	0.576770964	0.136675294	0.193884106	0.557941271	0.005546476	0.740522057	0.44941155	0.132847711	1	TRUE
948	956	YDR072C	chrIV	-	TATA-containing	TAF1-depleted	27399	591465	591470	-5	YDR072C	354.5	0.000685664	0.02751382	0.014717417	0.112844134	0.853139949	0.034921833	0.354670576	0.795047728	0.330126846	3	TRUE
949	957	YDR073W	chrIV	+	TATA-containing	TAF1-depleted	625	592412	592280	-132	YDR073W	1959.4	0.000574656	0.063429204	0.260218794	0.236677067	0.309312028	0.034977027	0.309312028	0.189347769	0.236677067	1	TRUE
950	958	ST4203	chrIV	-	TATA-less	TAF1-enriched	71	593257	593360	-103	ST4203	101.5	0.04100304	0.871641158	0.735486017	0.987162178	0.759817971	0.406024049	0.240151669	0.519604075	0.005932691	1	TRUE
951	959	YDR074W	chrIV	+	TATA-less	TAF1-depleted	19017	593870	593799	-71	YDR074W	4386.8	0.000150436	0.005682037	1	0.013567246	1	0.001438325	1	1	0.072607754	3	TRUE
952	960	YDR075W	chrIV	+	TATA-less	TAF1-enriched	105	597025	596982	-43	YDR075W	229.7	0.002158564	0.016372407	0.598234964	0.002079876	1	0.320413562	1	1	1	2	TRUE
953	961	YDR076W	chrIV	+	TATA-less	TAF1-enriched	15	NA	598419	NA	YDR076W	90.9	0.021508521	0.163093818	0.178093973	0.482388836	0.482388836	0.041302717	0.833090406	0.785572991	0.218953789	1	TRUE
954	962	orphan	chrIV	-	TATA-less	TAF1-enriched	231	599288	599518	-230	orphan	422.4	0.001965293	0.036336435	0.312264136	1	0.012753173	0.459277161	0.304014786	1	1	2	TRUE
955	963	YDR077W	chrIV	+	TATA-containing	TAF1-depleted	216827	600855	600756	-99	YDR077W	29967.9	0.000230752	0.006253927	0.713784747	0.057518843	1	0.004665219	1	1	0.028411695	3	TRUE
956	964	YDR078C	chrIV	-	TATA-less	TAF1-depleted	119	602864	602886	-22	YDR078C	408.4	0.000822218	0.001902768	0.480385546	1	1	1	1	1	1	1	TRUE
957	965	YDR080W	chrIV	+	TATA-less	TAF1-depleted	58	604030	603986	-44	YDR080W	867.6	0.000700735	0.086741366	0.076060453	0.348160685	0.615254471	0.027380699	0.866953757	0.279521153	0.348160685	1	TRUE
958	966	YDR081C	chrIV	-	TATA-less	TAF1-enriched	540	610134	610168	-34	YDR081C	553.2	0.000133552	1	0.000414279	1	1	1	1	1	1	1	TRUE
959	967	YDR082W	chrIV	+	TATA-less	TAF1-enriched	20	610565	610409	-156	YDR082W	231.6	0.00142889	0.038514035	0.352524243	0.336578626	0.141516432	0.214761781	0.379501523	0.164825776	0.141516432	1	TRUE
960	968	YDR083W	chrIV	+	TATA-less	TAF1-depleted	19	NA	612057	NA	YDR083W	1305.3	0.000133552	0.000414279	1	1	1	1	1	1	1	1	TRUE
961	969	YDR084C	chrIV	-	TATA-less	TAF1-depleted	1297	613999	614038	-39	YDR084C	2332.4	0.000599825	0.004195799	1	0.392352206	0.392352206	0.03057831	0.392352206	0.269478525	0.175634605	2	TRUE
962	970	YDR086C	chrIV	-	TATA-less	TAF1-depleted	4809	617178	617256	-78	YDR086C	8648.8	0.000823338	0.039753735	0.199364679	0.370982401	0.110140501	0.0948048	0.179611548	0.563612402	0.749337998	1	TRUE
963	971	ANT080	chrIV	+	TATA-less	TAF1-enriched	10	617680	617518	-162	ANT080	19.3	0.237409102	NA	NA	NA	NA	NA	NA	NA	NA	NA	NA
964	972	YDR087C	chrIV	-	TATA-less	TAF1-depleted	463	618303	618346	-43	YDR087C	1073.7	0.000140552	0.085266775	0.049211268	1	1	0.08214322	0.157399028	0.050502661	1	1	TRUE
965	973	YDR088C	chrIV	-	TATA-containing	TAF1-enriched	128	619808	619839	-31	YDR088C	200.8	0.000400628	0.066611284	0.168909622	0.078714946	0.801682522	0.023218789	0.381701684	0.745741703	0.078714946	1	TRUE
966	974	ST4216	chrIV	-	TATA-less	TAF1-enriched	61	621438	621560	-122	ST4216	50.2	0.005855984	0.014133335	0.007852556	0.132571979	0.74896245	0.521945881	0.2364017	0.772436162	0.442476123	2	TRUE
967	975	YDR089W	chrIV	+	TATA-less	TAF1-enriched	488	NA	621991	NA	YDR089W	484.4	0.010158385	0.207464343	0.41773015	0.7299283	0.004937481	0.769618236	0.7299283	0.002545508	0.7299283	2	TRUE
968	976	YDR090C	chrIV	-	TATA-containing	TAF1-depleted	73	NA	626071	NA	YDR090C	436.7	0.078839019	NA	NA	NA	NA	NA	NA	NA	NA	NA	NA
969	977	YDR091C	chrIV	-	TATA-less	TAF1-enriched	3757	628545	628588	-43	YDR091C	1986.8	0.000223664	0.153845424	0.08485611	0.25466223	0.345259513	0.048294872	0.126104364	0.223044753	0.126104364	1	TRUE
970	978	orphan	chrIV	-	TATA-less	TAF1-enriched	0	628837	628897	-60	orphan	11.1	0.117549764	NA	NA	NA	NA	NA	NA	NA	NA	NA	NA
971	979	CUT503	chrIV	-	TATA-less	TAF1-enriched	200	630512	630566	-54	CUT503	137	0.003239683	0.24846905	0.016583994	0.017864006	0.008678372	0.131515605	0.370166899	0.694664628	0.168745203	3	TRUE
972	980	YDR093W	chrIV	+	TATA-less	TAF1-enriched	138	631048	631016	-32	YDR093W	145.3	0.001290655	0.054448393	0.07042601	0.060832606	0.816454928	0.381086282	0.816454928	0.368681186	0.816454928	0	FALSE
973	981	YDR095C	chrIV	-	TATA-less	TAF1-enriched	18	636433	636573	-140	YDR095C	15.4	0.009362563	0.032557445	0.792144226	0.216864997	0.85996766	0.003068752	0.785128518	0.192099512	0.961625969	2	TRUE
974	982	YDR097C	chrIV	-	TATA-less	TAF1-enriched	937	643887	643894	-7	YDR097C	321.1	0.000543143	0.167563346	0.17678759	0.176705788	0.071657147	0.037866239	0.071657147	0.406244908	0.747711064	1	TRUE
975	983	YDR098C	chrIV	-	TATA-less	TAF1-enriched	2959	644955	644979	-24	YDR098C	2192.1	0.000247118	0.035576107	0.186470238	0.193882959	0.908352378	0.037469079	0.118216797	0.361282884	0.285095057	2	TRUE
976	984	orphan	chrIV	+	TATA-containing	TAF1-enriched	10418	652720	652681	-39	orphan	2622.8	0.000457351	0.336841448	0.076213466	0.021082103	0.633014509	0.016729366	0.13017939	0.74602178	0.227871447	2	TRUE
977	985	YDR100W	chrIV	+	TATA-less	TAF1-enriched	617	655026	654987	-39	YDR100W	1632.3	0.001051094	0.001683846	1	1	1	0.064192698	1	1	1	1	TRUE
978	986	YDR101C	chrIV	-	TATA-less	TAF1-enriched	10119	657431	657494	-63	YDR101C	3237.2	0.00108416	1	1	1	0.038867104	1	6.23E-06	1	1	2	TRUE
979	987	orphan	chrIV	+	TATA-less	TAF1-enriched	72	657791	657761	-30	orphan	40.3	0.010864551	0.056586092	0.355768462	0.178277454	0.915539026	0.393608598	0.519260531	0.132047919	0.508739436	0	FALSE
980	988	YDR103W	chrIV	+	TATA-less	TAF1-enriched	300	658346	658330	-16	YDR103W	324.3	0.000723894	0.27138113	0.095973694	0.187222519	0.065788268	0.230863761	0.065788268	0.088640054	0.987009435	0	FALSE
981	989	YDR104C	chrIV	-	TATA-less	TAF1-enriched	74	664905	664959	-54	YDR104C	176.9	NA	NA	NA	NA	NA	NA	NA	NA	NA	NA	NA
982	990	orphan	chrIV	-	TATA-less	TAF1-enriched	140	675600	675658	-58	orphan	109	0.046212949	0.235238803	0.476351469	0.883700742	0.188001055	0.125583853	0.12257344	0.529030423	0.107600033	0	FALSE
983	991	YDR110W	chrIV	+	TATA-less	TAF1-enriched	353	676077	676055	-22	YDR110W	474.7	0.004770639	0.247954871	0.14032891	0.027938384	0.424100567	0.605879798	0.424100567	0.302106177	0.133941364	1	TRUE
984	992	YDR111C	chrIV	-	TATA-less	TAF1-depleted	1319	679947	679956	-9	YDR111C	614.5	0.000545355	0.174097562	0.081287567	0.195431419	0.112743791	0.094638395	0.112743791	0.503770635	0.243934009	0	FALSE
985	993	YDR113C	chrIV	-	TATA-less	TAF1-enriched	82	681661	681702	-41	YDR113C	122.9	0.002800039	0.056737301	0.254204254	0.230248242	0.348878222	0.020742514	0.986887744	1	0.118457939	1	TRUE
986	994	YDR115W	chrIV	+	TATA-less	TAF1-enriched	1249	682190	682155	-35	YDR115W	2412.9	0.002143001	0.008893571	1	1	0.251660433	0.295498133	0.021868088	1	0.008087197	3	TRUE
987	995	YDR116C	chrIV	-	TATA-less	TAF1-enriched	418	683551	683602	-51	YDR116C	175.5	0.000707649	0.260012561	0.066099604	0.021603612	0.334050141	0.010242638	0.864641716	0.41970248	0.208312284	2	TRUE
988	996	YDR117C	chrIV	-	TATA-less	TAF1-enriched	661	685633	685689	-56	YDR117C	930.8	0.000136527	0.307267696	0.125656232	0.005173187	1	0.000306574	0.142124681	1	0.05911572	2	TRUE
989	997	YDR118W	chrIV	+	TATA-less	TAF1-enriched	123	685895	685855	-40	YDR118W	134.2	0.002263135	0.101593811	0.138147502	0.092285878	0.594064732	0.029754824	0.536871333	0.425302977	0.939310559	1	TRUE
990	998	CUT504	chrIV	-	TATA-less	TAF1-depleted	51	687834	687860	-26	CUT504	23.7	0.007292808	0.011505079	0.905341658	0.392621705	0.630973593	0.020185039	0.541449024	0.521418864	0.12386031	2	TRUE
991	999	YDR119W	chrIV	+	TATA-less	TAF1-enriched	553	688203	688142	-61	YDR119W	3798.9	0.001177714	0.331935064	0.048750575	0.352384889	0.352384889	0.22991012	0.135018864	0.150882673	0.039472529	2	TRUE
992	1000	CUT505	chrIV	-	TATA-less	TAF1-enriched	6	690336	690360	-24	CUT505	24.9	0.085994295	NA	NA	NA	NA	NA	NA	NA	NA	NA	NA
993	1001	YDR120C	chrIV	-	TATA-less	TAF1-enriched	152	693212	693233	-21	YDR120C	845.8	0.000460896	0.518961022	0.028320172	0.723899189	0.040475394	0.648356214	0.040475394	0.008167346	0.723899189	4	TRUE
994	1002	YDR121W	chrIV	+	TATA-less	TAF1-depleted	1297	693477	693465	-12	YDR121W	816.4	0.000580506	0.040383866	0.109717135	0.518010112	0.496227368	0.028084559	0.496227368	0.582987748	0.518010112	2	TRUE
995	1003	YDR123C	chrIV	-	TATA-less	TAF1-enriched	669	699333	699420	-87	YDR123C	271.8	0.001541815	0.02331564	0.003810497	0.18616983	0.043092579	0.399193311	0.31564767	0.680889114	0.435123191	3	TRUE
996	1004	orphan	chrIV	+	TATA-less	TAF1-enriched	106	700018	699969	-49	orphan	178.7	0.033878836	0.080804458	0.008817346	0.532591454	0.110353049	0.077019413	0.522000825	0.729884451	0.034404099	2	TRUE
997	1005	YDR126W	chrIV	+	TATA-containing	TAF1-enriched	335	703264	703228	-36	YDR126W	106.5	0.008587107	0.11888068	0.080297993	0.310666378	0.993630657	0.065074495	0.48736251	0.672631211	0.48736251	0	FALSE
998	1006	CUT507	chrIV	-	TATA-containing	TAF1-enriched	243	703919	704041	-122	CUT507	119.9	0.002501082	0.055570739	0.43673429	0.055252449	0.460961974	0.016844515	0.163737969	0.915776	0.001566668	2	TRUE
999	1007	YDR127W	chrIV	+	TATA-less	TAF1-enriched	808	704445	704403	-42	YDR127W	737.5	0.002177753	0.092824068	0.178771183	0.194583868	0.90010442	0.094013258	0.295524717	0.176861507	0.194583868	0	FALSE
1000	1008	YDR128W	chrIV	+	TATA-less	TAF1-enriched	171	709694	709505	-189	YDR128W	106.9	0.000151582	1	0.004326282	1	0.010197877	1	0.004714045	1	1	3	TRUE
1001	1009	YDR129C	chrIV	-	TATA-less	TAF1-enriched	4105	715374	715422	-48	YDR129C	2959.4	0.000195684	0.018022279	0.141498216	0.441140653	1	0.011366285	1	1	0.092843404	2	TRUE
1002	1010	YDR130C	chrIV	-	TATA-less	TAF1-depleted	109	716625	716650	-25	YDR130C	271.9	0.000198534	0.028784579	0.139126493	0.041063718	1	0.008355545	1	1	0.481156643	3	TRUE
1003	1011	orphan	chrIV	+	TATA-less	TAF1-enriched	1	717067	716902	-165	orphan	3.9	0.013429357	0.075884748	1	0.001467476	0.192103753	0.012434874	0.53612806	0.05170697	0.015386227	3	TRUE
1004	1012	YDR131C	chrIV	-	TATA-less	TAF1-enriched	272	NA	718515	NA	YDR131C	51	0.033087608	0.870722928	0.625393417	0.922535926	0.051799428	0.102685955	0.770501073	0.900099148	0.01256654	1	TRUE
1005	1013	YDR132C	chrIV	-	TATA-less	TAF1-enriched	101	720395	720422	-27	YDR132C	234.5	0.002366108	1	0.018178716	0.385122731	0.147758692	0.262192602	0.147758692	0.026480683	0.385122731	2	TRUE
1006	1014	YDR134C	chrIV	-	TATA-containing	TAF1-depleted	24391	721455	721533	-78	YDR134C	16705.3	0.000354323	0.012128829	0.437976001	0.005999919	1	0.003531324	1	1	0.005999919	4	TRUE
1007	1015	YDR135C	chrIV	-	TATA-containing	TAF1-enriched	250	727579	727606	-27	YDR135C	3310.6	0.001858811	0.734526182	0.045245042	0.583436924	0.099946275	0.109913035	0.099946275	0.033684092	0.583436924	2	TRUE
1008	1016	CUT069	chrIV	+	TATA-containing	TAF1-enriched	17	727854	727852	-2	CUT069	5.9	0.617207712	NA	NA	NA	NA	NA	NA	NA	NA	NA	NA
1009	1017	YDR137W	chrIV	+	TATA-less	TAF1-enriched	133	728214	728159	-55	YDR137W	353.6	0.000541741	0.004441797	1	1	1	0.011051172	1	1	0.017389183	3	TRUE
1010	1018	YDR138W	chrIV	+	TATA-less	TAF1-enriched	485	730609	730574	-35	YDR138W	141.9	0.000254885	0.175768358	0.068027982	0.114141614	0.208597874	0.041392637	0.317554545	0.169568513	0.458353092	1	TRUE
1011	1019	YDR140W	chrIV	+	TATA-containing	TAF1-enriched	135	734175	734133	-42	YDR140W	410.6	0.004378469	0.002629267	1	1	1	1	1	1	1	1	TRUE
1012	1020	YDR141C	chrIV	-	TATA-less	TAF1-enriched	4320	739995	740039	-44	YDR141C	641.5	0.000522903	0.064469243	0.010852832	1	1	1	1	1	1	1	TRUE
1013	1021	YDR142C	chrIV	-	TATA-less	TAF1-depleted	62	741732	741750	-18	YDR142C	492.2	0.000776902	0.123414514	0.109631338	0.076930966	0.548232487	0.02935133	0.188707309	0.659982768	0.935333323	1	TRUE
1014	1022	YDR143C	chrIV	-	TATA-less	TAF1-depleted	234	743950	744006	-56	YDR143C	128.1	0.000809095	0.293990064	0.051307149	0.146117044	0.095539076	0.185145096	0.160283961	0.134995726	0.675382925	0	FALSE
1015	1023	YDR144C	chrIV	-	TATA-less	TAF1-depleted	281	746196	746263	-67	YDR144C	1393.8	0.003985556	1	0.007698331	0.423956006	0.174647429	0.301955359	0.042679358	0.77329349	0.423956006	2	TRUE
1016	1024	YDR145W	chrIV	+	TATA-less	TAF1-enriched	468	746717	746672	-45	YDR145W	1124.3	0.000221418	0.097213699	0.120202707	0.248532657	0.91527304	0.02874149	0.20462143	0.064468641	0.59476112	1	TRUE
1017	1025	YDR146C	chrIV	-	TATA-less	TAF1-enriched	144	750887	750907	-20	YDR146C	709.7	0.00051089	0.102523762	0.285203824	0.126408273	0.228889527	0.026076043	0.073683015	0.501761026	0.313403164	1	TRUE
1018	1026	CUT508	chrIV	-	TATA-less	TAF1-enriched	0	751250	751323	-73	CUT508	44.4	0.143123779	NA	NA	NA	NA	NA	NA	NA	NA	NA	NA
1019	1027	YDR147W	chrIV	+	TATA-less	TAF1-enriched	388	751598	751562	-36	YDR147W	287.7	0.000265938	0.087185382	0.158433692	0.139079526	0.308191868	0.05617514	0.188553975	0.269867617	0.139079526	0	FALSE
1020	1028	YDR148C	chrIV	-	TATA-less	TAF1-enriched	2164	755070	755130	-60	YDR148C	1249.9	0.252819564	NA	NA	NA	NA	NA	NA	NA	NA	NA	NA
1021	1029	orphan	chrIV	-	TATA-less	TAF1-enriched	645	755070	755309	-239	orphan	538.5	0.004163197	0.872097935	0.048173079	0.058508884	0.441553542	0.040450169	0.320207725	0.590471218	0.058508884	2	TRUE
1022	1030	YDR151C	chrIV	-	TATA-less	TAF1-enriched	469	765274	765319	-45	YDR151C	1039.1	0.001940341	0.087964428	0.31196765	0.059242069	0.377439425	0.085366052	0.377439425	0.254510191	0.182666629	0	FALSE
1023	1031	YDR152W	chrIV	+	TATA-less	TAF1-enriched	1056	765703	765677	-26	YDR152W	1101.3	0.000393657	0.016333942	0.164448378	0.073259979	0.828730973	0.050587718	0.828730973	0.780029886	0.516345952	1	TRUE
1024	1032	YDR153C	chrIV	-	TATA-less	TAF1-depleted	2169	767905	768104	-199	YDR153C	226.2	0.013103017	0.038351775	0.34375232	0.928979048	0.632609028	0.396827238	0.041974634	0.551008884	0.632609028	2	TRUE
1025	1033	YDR155C	chrIV	-	TATA-containing	TAF1-depleted	93200	768917	769037	-120	YDR155C	12319.1	0.000291273	0.33330489	0.03431427	0.030692376	0.672826591	0.022797838	0.39375715	0.585649921	0.077798332	3	TRUE
1026	1034	YDR156W	chrIV	+	TATA-less	TAF1-enriched	3917	769540	769485	-55	YDR156W	2268.5	0.000931477	0.04730137	0.36725206	0.288342056	0.360920567	0.003721461	0.360920567	0.413248788	0.174440702	2	TRUE
1027	1035	YDR157W	chrIV	+	TATA-less	TAF1-enriched	418	769953	769919	-34	YDR157W	42.1	0.737305717	NA	NA	NA	NA	NA	NA	NA	NA	NA	NA
1028	1036	YDR158W	chrIV	+	TATA-less	TAF1-depleted	845	770344	770322	-22	YDR158W	2730.7	0.011014667	0.007581723	1	1	1	1	1	1	0.060892662	1	TRUE
1029	1037	YDR159W	chrIV	+	TATA-less	TAF1-enriched	153	772026	771935	-91	YDR159W	334	0.032441165	0.109037602	0.249163349	0.390881767	0.390881767	0.969531018	0.390881767	0.267992158	0.866851586	0	FALSE
1030	1038	YDR160W	chrIV	+	TATA-less	TAF1-enriched	433	NA	776034	NA	YDR160W	181.2	0.000871685	0.026440206	0.146175281	0.462515748	1	1	0.421002594	0.222650897	0.030071627	2	TRUE
1031	1039	YDR161W	chrIV	+	TATA-less	TAF1-enriched	149	779042	779014	-28	YDR161W	2353.3	0.000583132	0.024444702	0.230882939	0.785552017	0.09284796	0.179244897	0.09284796	0.207513447	0.575351593	1	TRUE
1032	1040	YDR162C	chrIV	-	TATA-less	TAF1-depleted	675	781188	781230	-42	YDR162C	145.4	0.002609265	0.007900689	0.838095949	0.084221045	0.370612097	0.311834654	0.608920025	0.193482566	0.055040205	1	TRUE
1033	1041	YDR163W	chrIV	+	TATA-less	TAF1-enriched	3119	781428	781359	-69	YDR163W	269.4	0.002566216	0.119038154	0.276491247	0.321815753	0.379961605	0.018250869	0.230078457	0.610378794	0.321815753	1	TRUE
1034	1042	YDR164C	chrIV	-	TATA-less	TAF1-enriched	454	784216	784267	-51	YDR164C	818.4	0.000147942	0.010927994	1	0.05960336	1	0.000319242	1	1	0.019501239	3	TRUE
1035	1043	CUT513	chrIV	-	TATA-less	TAF1-enriched	69	784599	784663	-64	CUT513	15.5	0.012718862	0.16266008	0.317614778	0.221121472	0.562199895	0.151541198	0.06645722	0.441884466	0.846808338	0	FALSE
1036	1044	YDR165W	chrIV	+	TATA-less	TAF1-depleted	357	784884	784840	-44	YDR165W	867.8	0.00062893	0.081834303	0.054031442	0.474710534	0.540063897	0.140976627	0.117388252	0.312141182	1	0	FALSE
1037	1045	YDR167W	chrIV	+	TATA-less	TAF1-enriched	930	789646	789542	-104	YDR167W	2405.2	0.001746849	0.220369601	0.098028605	0.250336975	0.820773706	0.02103806	0.507414839	0.14363883	0.496726177	1	TRUE
1038	1046	YDR168W	chrIV	+	TATA-less	TAF1-enriched	261	790327	790288	-39	YDR168W	2633.4	0.000534104	1	0.002384293	1	1	1	1	0.008991832	1	2	TRUE
1039	1047	YDR169C	chrIV	-	TATA-less	TAF1-enriched	190	794212	794255	-43	YDR169C	386	0.07918344	NA	NA	NA	NA	NA	NA	NA	NA	NA	NA
1040	1048	CUT071	chrIV	+	TATA-less	TAF1-enriched	150	794507	794482	-25	CUT071	29	0.039620343	0.512781234	0.079210508	0.448618049	0.864146487	0.112222536	0.458435254	0.712765204	0.348775647	0	FALSE
1041	1049	YDR170C	chrIV	-	TATA-less	TAF1-depleted	651	802191	802418	-227	YDR170C	460.5	0.001917295	0.078616835	0.078616835	0.261068158	0.630048495	0.044373358	0.797267872	0.507155635	0.422110967	1	TRUE
1042	1050	tQ(UUG)D3	chrIV	+	TATA-less	-	12	802653	802597	-56	tQ(UUG)D3	20.4	0.083371562	NA	NA	NA	NA	NA	NA	NA	NA	NA	NA
1043	1051	orphan	chrIV	-	TATA-less	TAF1-enriched	3805	806007	806206	-199	orphan	108.1	0.011777449	0.052007995	0.215260054	0.809189939	0.809189939	0.029097297	0.109406913	0.755239667	0.090970887	1	TRUE
1044	1052	YDR171W	chrIV	+	TATA-containing	TAF1-depleted	12479	806674	806560	-114	YDR171W	1466.5	0.122949532	NA	NA	NA	NA	NA	NA	NA	NA	NA	NA
1045	1053	YDR172W	chrIV	+	TATA-less	TAF1-enriched	92105	808318	808271	-47	YDR172W	5640.6	0.00105521	0.200416622	0.0538452	0.030017567	0.810902458	0.02746771	0.318133948	0.725220163	0.603219716	2	TRUE
1046	1054	YDR173C	chrIV	-	TATA-less	TAF1-enriched	75	811644	811675	-31	YDR173C	1438.9	0.000246722	0.02947644	0.257104382	0.395660582	0.513509985	0.042925892	0.132896095	0.398941796	0.116853828	2	TRUE
1047	1055	YDR174W	chrIV	+	TATA-less	TAF1-enriched	20288	812135	812085	-50	YDR174W	1358.4	0.003865056	0.004526426	1	0.20695319	1	0.036196745	1	1	1	2	TRUE
1048	1056	orphan	chrIV	-	TATA-less	TAF1-enriched	1	812289	812323	-34	orphan	4.5	0.211790205	NA	NA	NA	NA	NA	NA	NA	NA	NA	NA
1049	1057	YDR175C	chrIV	-	TATA-less	TAF1-enriched	287	814159	814199	-40	YDR175C	458.5	0.000157025	0.007136993	1	1	1	0.000999676	1	1	0.010806276	3	TRUE
1050	1058	YDR176W	chrIV	+	TATA-less	TAF1-enriched	40	NA	814458	NA	YDR176W	267.5	0.001041023	0.314900936	0.076143502	0.016939885	0.441881354	0.004624415	0.764548572	0.974989138	0.045559431	3	TRUE
1051	1059	YDR177W	chrIV	+	TATA-less	TAF1-enriched	366	816984	816789	-195	YDR177W	1924.4	0.000929747	0.028146753	0.157546841	1	0.429174055	0.19459728	0.222900893	0.209634635	0.429174055	1	TRUE
1052	1060	YDR178W	chrIV	+	TATA-containing	TAF1-enriched	2773	817864	817848	-16	YDR178W	1392.5	0.000146491	0.004126571	1	0.030041953	1	0.002753254	1	1	0.030041953	4	TRUE
1053	1061	YDR180W	chrIV	+	TATA-less	TAF1-enriched	30	821187	821158	-29	YDR180W	125.2	NA	NA	NA	NA	NA	NA	NA	NA	NA	NA	NA
1054	1062	YDR184C	chrIV	-	TATA-less	TAF1-enriched	216	831510	831542	-32	YDR184C	1115.4	0.000412884	0.073268183	0.028582939	1	1	1	0.058832524	0.260244947	0.424070315	1	TRUE
1055	1063	ST0592	chrIV	+	TATA-less	TAF1-enriched	50	832026	831853	-173	ST0592	65.3	0.011346037	0.105762241	0.018968042	0.110415619	0.823157359	0.103509664	0.103470956	0.364526236	0.090625478	1	TRUE
1056	1064	YDR185C	chrIV	-	TATA-less	TAF1-enriched	1064	832369	832505	-136	YDR185C	590.5	0.000535631	0.14446979	0.014275284	1	0.30475798	1	0.02993236	1	1	2	TRUE
1057	1065	YDR186C	chrIV	-	TATA-less	TAF1-enriched	3014	835480	835546	-66	YDR186C	469.8	0.000221557	0.342249774	0.043573045	0.104037298	0.193439754	0.035849946	0.193439754	0.401216773	0.104037298	2	TRUE
1058	1066	orphan	chrIV	-	TATA-less	TAF1-depleted	788	835680	835684	-4	orphan	348.8	0.001208349	0.259656356	0.168297957	0.062778126	0.377118653	0.016295442	0.377118653	0.471794658	0.062778126	1	TRUE
1059	1067	orphan	chrIV	-	TATA-less	TAF1-enriched	6	836224	836290	-66	orphan	0.6	0.724854698	NA	NA	NA	NA	NA	NA	NA	NA	NA	NA
1060	1068	YDR188W	chrIV	+	TATA-less	TAF1-enriched	885	836412	836373	-39	YDR188W	1291.4	0.000971227	0.055135493	0.161072282	0.846234745	0.207484952	0.218354144	0.075462305	0.834737173	0.075462305	0	FALSE
1061	1069	YDR189W	chrIV	+	TATA-less	TAF1-enriched	5642	838398	838363	-35	YDR189W	1593.6	0.000256686	0.060853824	0.11372797	0.235162846	0.210812182	0.062321668	0.210812182	0.281490127	0.422473139	0	FALSE
1062	1070	YDR190C	chrIV	-	TATA-less	TAF1-enriched	265	841988	842041	-53	YDR190C	4196.2	0.000337946	0.113939873	0.100926224	0.083344354	0.377702648	0.025385246	0.377702648	0.342606136	0.343393919	1	TRUE
1063	1071	YDR191W	chrIV	+	TATA-less	TAF1-enriched	524	842340	842312	-28	YDR191W	138.5	0.001974138	0.625887823	0.02037189	0.615887269	0.486498165	0.009012054	0.446882172	0.464628277	0.13230791	2	TRUE
1064	1072	YDR192C	chrIV	-	TATA-less	TAF1-enriched	415	844882	844934	-52	YDR192C	313.8	0.000975697	0.540578795	0.043446148	0.115185024	0.075664897	0.003742035	0.893348097	0.745537481	0.024726181	3	TRUE
1065	1073	YDR194C	chrIV	-	TATA-containing	TAF1-enriched	197	847928	847969	-41	YDR194C	1158.7	NA	NA	NA	NA	NA	NA	NA	NA	NA	NA	NA
1066	1074	YDR195W	chrIV	+	TATA-containing	TAF1-enriched	446	848376	848360	-16	YDR195W	466	0.000703946	0.054923519	0.353537766	1	1	0.029882482	0.063258179	0.108249273	1	1	TRUE
1067	1075	YDR196C	chrIV	-	TATA-less	TAF1-depleted	682	850980	850999	-19	YDR196C	714	0.002325948	0.006537894	0.315203163	0.167736402	0.431232375	0.009019247	0.431232375	0.309571398	0.40210698	2	TRUE
1068	1076	YDR197W	chrIV	+	TATA-less	TAF1-enriched	405	851249	851227	-22	YDR197W	624.6	0.66799686	NA	NA	NA	NA	NA	NA	NA	NA	NA	NA
1069	1077	YDR198C	chrIV	-	TATA-less	TAF1-enriched	69	NA	853988	NA	YDR198C	223	0.001516087	0.159096974	0.078383403	0.228169262	0.664410628	0.012802392	0.431092061	0.739967847	0.032596118	2	TRUE
1070	1078	YDR200C	chrIV	-	TATA-less	TAF1-enriched	4529	856111	856158	-47	YDR200C	744	0.030672894	0.451522266	1	0.122011788	1	0.0003263	1	1	1	1	TRUE
1071	1079	YDR205W	chrIV	+	TATA-less	TAF1-enriched	3011	859363	859345	-18	YDR205W	1109.8	0.000252814	0.052416993	0.07926607	0.137807215	0.866082102	0.021014645	0.866082102	0.827655421	0.073848122	1	TRUE
1072	1080	YDR206W	chrIV	+	TATA-less	TAF1-enriched	110	NA	861763	NA	YDR206W	495.6	0.000514135	0.364929638	0.020950872	0.109424748	0.423483688	0.0316132	0.29073185	1	0.262479942	2	TRUE
1073	1081	YDR207C	chrIV	-	TATA-less	TAF1-enriched	560	867535	867591	-56	YDR207C	431.4	0.00026949	0.646491758	0.007811289	0.066680742	0.808133538	0.01791108	0.808133538	0.358161603	0.066680742	2	TRUE
1074	1082	YDR208W	chrIV	+	TATA-less	TAF1-enriched	3215	868295	868132	-163	YDR208W	2194.5	0.050817019	NA	NA	NA	NA	NA	NA	NA	NA	NA	NA
1075	1083	YDR210W	chrIV	+	TATA-containing	TAF1-enriched	4165	871059	871042	-17	YDR210W	3741.6	0.000451367	1	0.000981282	1	0.121786358	1	1	1	1	1	TRUE
1076	1084	YDR211W	chrIV	+	TATA-containing	TAF1-depleted	211	884751	884685	-66	YDR211W	1850.5	0.002405113	0.191673513	0.039992859	0.557493856	0.109820484	0.258182463	0.16943686	0.843753942	0.426332783	1	TRUE
1077	1085	YDR212W	chrIV	+	TATA-less	TAF1-enriched	4308	887220	887164	-56	YDR212W	2211.2	0.000321592	0.064861221	0.175771522	0.251778143	1	0.009029371	0.458356383	0.338393303	0.091920182	1	TRUE
1078	1086	CUT515	chrIV	-	TATA-less	TAF1-enriched	1745	892390	892429	-39	CUT515	84.6	0.202988251	NA	NA	NA	NA	NA	NA	NA	NA	NA	NA
1079	1087	YDR214W	chrIV	+	TATA-less	TAF1-depleted	225	892948	892759	-189	YDR214W	2597.3	0.000138833	0.000422468	1	1	1	1	1	1	1	1	TRUE
1080	1088	YDR219C	chrIV	-	TATA-less	TAF1-enriched	269	NA	907062	NA	YDR219C	225.2	0.000397005	0.109652557	0.058674873	0.128149079	0.235273502	0.106412675	0.149363068	0.530461831	0.638373537	0	FALSE
1081	1089	YDR221W	chrIV	+	TATA-less	TAF1-enriched	299	907502	907335	-167	YDR221W	798.4	0.000137814	0.042961609	0.030108477	1	1	1	1	1	0.017518145	3	TRUE
1082	1090	ST4285	chrIV	-	TATA-less	TAF1-enriched	216	909223	909375	-152	ST4285	123.3	0.044148377	0.330261467	0.0084811	0.264470487	0.264470487	0.149696595	0.264470487	0.451946571	0.264470487	1	TRUE
1083	1091	YDR222W	chrIV	+	TATA-containing	TAF1-enriched	2775	910042	910014	-28	YDR222W	1018.6	0.014956217	1	1	0.304531922	0.054206689	0.184990204	0.026104483	0.638737925	0.304531922	1	TRUE
1084	1092	YDR224C	chrIV	-	TATA-containing	TAF1-depleted	88252	914665	914746	-81	YDR224C	6500.4	0.000204075	0.004047709	1	0.356742015	1	0.002115146	1	1	0.017276192	3	TRUE
1085	1093	CUT073	chrIV	+	TATA-less	TAF1-enriched	536	915270	915230	-40	CUT073	15.3	0.417229747	NA	NA	NA	NA	NA	NA	NA	NA	NA	NA
1086	1094	YDR225W	chrIV	+	TATA-containing	TAF1-depleted	1598	915439	915432	-7	YDR225W	21883.4	0.014750921	0.010348834	0.422059621	1	1	1	1	1	1	1	TRUE
1087	1095	orphan	chrIV	+	TATA-less	TAF1-depleted	98	916125	915931	-194	orphan	153.7	0.652738544	NA	NA	NA	NA	NA	NA	NA	NA	NA	NA
1088	1096	YDR226W	chrIV	+	TATA-containing	TAF1-depleted	5157	916480	916451	-29	YDR226W	6548.3	0.000188286	0.155559415	0.05828418	0.183901164	0.456002056	0.086249292	0.135989775	0.137439936	0.183901164	0	FALSE
1089	1097	YDR227W	chrIV	+	TATA-less	TAF1-enriched	121	917481	917463	-18	YDR227W	61.3	0.000834945	0.360906692	0.07244575	0.00735741	0.972935508	0.046275722	0.519180255	0.405303215	0.185786868	2	TRUE
1090	1098	YDR228C	chrIV	-	TATA-less	TAF1-depleted	93	923725	923850	-125	YDR228C	169.7	0.004020387	0.445224139	0.065054075	0.176946009	0.502377545	0.041798659	0.502377545	0.386523557	0.176946009	1	TRUE
1091	1099	orphan	chrIV	+	TATA-less	TAF1-enriched	7	924320	924170	-150	orphan	20.7	0.012396787	0.283071504	0.180854041	0.33379744	0.723053487	0.00136228	0.420582538	0.429391315	0.053237869	1	TRUE
1092	1100	ST4290	chrIV	-	TATA-containing	TAF1-enriched	128	924461	924524	-63	ST4290	161	0.00403222	0.36979451	0.021338758	0.394511349	0.743300055	0.025042253	0.973875038	0.983134652	0.43188666	2	TRUE
1093	1101	orphan	chrIV	+	TATA-containing	TAF1-enriched	253	926708	926524	-184	orphan	62.9	0.033687431	0.078028747	0.821257255	0.049595512	0.364158039	0.382483581	0.400083199	0.53675942	0.053552682	1	TRUE
1094	1102	YDR231C	chrIV	-	TATA-less	TAF1-enriched	1445	926894	926935	-41	YDR231C	458.7	0.000369989	0.244757129	0.094878835	0.113061864	0.781235105	0.003861442	0.303404495	0.719952809	0.055966406	1	TRUE
1095	1103	YDR232W	chrIV	+	TATA-less	TAF1-enriched	37705	927243	927201	-42	YDR232W	1456.5	0.000399201	0.049675222	0.211656745	0.579709043	0.579709043	0.039323801	0.203904888	0.256151988	0.110427362	2	TRUE
1096	1104	YDR233C	chrIV	-	TATA-containing	TAF1-enriched	13286	930304	930369	-65	YDR233C	5198.5	0.003755967	0.726233461	0.059064552	0.009508881	0.56506198	0.011416385	0.56506198	0.457627245	0.050055634	2	TRUE
1097	1105	orphan	chrIV	+	TATA-less	TAF1-enriched	288	930670	930510	-160	orphan	87.2	0.132518556	NA	NA	NA	NA	NA	NA	NA	NA	NA	NA
1098	1106	YDR234W	chrIV	+	TATA-containing	TAF1-depleted	780	931178	931021	-157	YDR234W	619.9	0.003365935	0.100583702	0.089004153	0.510234551	0.552357423	0.026519884	0.377065134	0.262874318	0.143881626	1	TRUE
1099	1107	YDR235W	chrIV	+	TATA-less	TAF1-depleted	324	933523	933493	-30	YDR235W	624.6	0.000732114	0.012679717	0.552856067	0.152634227	0.298242423	0.008719469	0.649043195	0.50193227	0.055125355	2	TRUE
1100	1108	YDR236C	chrIV	-	TATA-less	TAF1-enriched	355	935919	935917	2	YDR236C	672.3	0.078839019	NA	NA	NA	NA	NA	NA	NA	NA	NA	NA
1101	1109	YDR237W	chrIV	+	TATA-less	TAF1-enriched	118	NA	936473	NA	YDR237W	510	0.004540231	0.626471858	0.043210292	0.78191158	0.021060032	0.720804039	0.015101259	0.720804039	0.78191158	3	TRUE
1102	1110	YDR238C	chrIV	-	TATA-less	TAF1-enriched	1940	940803	940870	-67	YDR238C	2664.2	0.000233879	0.034423866	0.191427579	0.082262202	0.539672136	0.003206918	1	1	0.082262202	2	TRUE
1103	1111	YDR239C	chrIV	-	TATA-less	TAF1-enriched	143	943409	943432	-23	YDR239C	406.1	0.000258058	0.346419009	0.070733626	0.096194633	0.25795393	0.031738875	0.25795393	0.144173292	0.096194633	1	TRUE
1104	1112	YDR244W	chrIV	+	TATA-containing	TAF1-enriched	3375	950571	950538	-33	YDR244W	389.7	0.001613836	0.169674075	0.029027101	1	1	1	0.231796816	0.020583037	1	2	TRUE
1105	1113	YDR245W	chrIV	+	TATA-less	TAF1-enriched	624	952907	952779	-128	YDR245W	948.3	0.001170701	0.149097206	0.025036939	0.966472642	0.145854586	0.323346563	0.966472642	0.640735937	0.160351107	1	TRUE
1106	1114	YDR246W	chrIV	+	TATA-less	TAF1-enriched	284	954313	954294	-19	YDR246W	1106.4	0.000896816	0.12377801	0.147457163	0.02111824	0.823420231	0.002912194	0.734719307	0.708820324	0.212039662	2	TRUE
1107	1115	ANT129	chrIV	-	TATA-less	TAF1-enriched	10	954639	954687	-48	ANT129	78.2	0.317985628	NA	NA	NA	NA	NA	NA	NA	NA	NA	NA
1108	1116	YDR247W	chrIV	+	TATA-less	TAF1-depleted	916	955677	955667	-10	YDR247W	196.3	0.001163475	0.00980313	0.882002732	0.016108469	0.819928427	0.001891807	1	0.130693362	0.059276709	3	TRUE
1109	1117	YDR248C	chrIV	-	TATA-containing	TAF1-enriched	425	958385	958404	-19	YDR248C	1418	0.000153763	0.023781536	1	0.004349697	1	0.000231933	1	1	0.07169916	3	TRUE
1110	1118	YDR249C	chrIV	-	TATA-less	TAF1-enriched	118	959795	959888	-93	YDR249C	171.4	0.006481288	0.929473591	0.136258268	0.063126541	0.005723591	0.33724571	0.467127611	0.066387569	0.961335799	1	TRUE
1111	1119	orphan	chrIV	-	TATA-less	TAF1-enriched	69	959937	959971	-34	orphan	139.2	0.169720942	NA	NA	NA	NA	NA	NA	NA	NA	NA	NA
1112	1120	YDR251W	chrIV	+	TATA-less	TAF1-enriched	3901	960346	960324	-22	YDR251W	458.3	0.001800371	0.042281465	0.389938459	0.080888923	0.553398266	0.024227814	0.620424024	0.361831743	0.273059545	2	TRUE
1113	1121	YDR252W	chrIV	+	TATA-less	TAF1-enriched	138	963441	963404	-37	YDR252W	343.2	0.000133552	0.000414279	1	1	1	1	1	1	1	1	TRUE
1114	1122	YDR253C	chrIV	-	TATA-less	TAF1-enriched	6	964930	964973	-43	YDR253C	5.6	0.170659292	NA	NA	NA	NA	NA	NA	NA	NA	NA	NA
1115	1123	YDR254W	chrIV	+	TATA-less	TAF1-enriched	52	965094	965041	-53	YDR254W	52.8	0.001143918	0.404290514	0.500922491	0.045993065	0.526670443	0.001389244	0.214180517	0.656411686	0.129867664	2	TRUE
1116	1124	YDR255C	chrIV	-	TATA-less	TAF1-enriched	530	967809	967867	-58	YDR255C	440.5	0.069662936	NA	NA	NA	NA	NA	NA	NA	NA	NA	NA
1117	1125	YDR257C	chrIV	-	TATA-less	TAF1-enriched	78	971421	971470	-49	YDR257C	698.9	0.000647697	0.398110674	0.184225151	0.027919034	0.363285754	0.00197328	0.363285754	0.814414979	0.095022587	2	TRUE
1118	1126	YDR258C	chrIV	-	TATA-containing	TAF1-depleted	1251	974124	974272	-148	YDR258C	1166.5	0.000600457	0.107361727	0.254591368	0.396079513	0.474285795	0.041269396	0.121736225	0.045733062	0.560295514	2	TRUE
1119	1127	CUT075	chrIV	+	TATA-less	TAF1-enriched	16	NA	974614	NA	CUT075	6.5	0.048065611	0.272911801	0.00875002	0.128047201	0.034503771	0.790624605	0.174678352	0.873432702	0.174678352	2	TRUE
1120	1128	orphan	chrIV	+	TATA-less	TAF1-enriched	83	976518	976498	-20	orphan	21.7	0.007404311	0.215929595	0.506700692	0.257481504	0.114405569	0.081979962	0.358900248	0.227902153	0.257481504	0	FALSE
1121	1129	ST0633	chrIV	+	TATA-less	TAF1-enriched	287	977052	976924	-128	ST0633	68.4	0.031868747	0.015783338	0.474832927	0.449198739	0.449198739	0.328587956	0.031675765	0.744686146	0.923773751	2	TRUE
1122	1130	YDR260C	chrIV	-	TATA-less	TAF1-enriched	139	977212	977255	-43	YDR260C	760.7	0.003390611	0.047883606	0.833800126	0.824587622	0.137314825	0.080347211	0.137314825	0.774765672	0.083248461	1	TRUE
1123	1131	YDR261C	chrIV	-	TATA-containing	TAF1-enriched	1523	NA	979222	NA	YDR261C	3011	0.046856852	0.178894077	0.700942878	0.752361082	0.587776985	0.058691676	0.093988488	0.49719657	0.059419675	0	FALSE
1124	1132	orphan	chrIV	+	TATA-less	TAF1-enriched	29	NA	979577	NA	orphan	55	0.026821255	0.039837311	0.318108401	0.494274962	0.681721453	0.005939603	0.355085799	0.779246996	0.28483719	2	TRUE
1125	1133	ST4309	chrIV	-	TATA-containing	TAF1-enriched	114	980817	980848	-31	ST4309	122	0.030965207	0.099998422	0.186246907	0.200898651	0.23702025	0.000543952	0.865856476	0.049678869	0.102483441	2	TRUE
1126	1134	tG(GCC)D2	chrIV	+	TATA-less	-	453	992844	992821	-23	tG(GCC)D2	10.8	0.115176402	NA	NA	NA	NA	NA	NA	NA	NA	NA	NA
1127	1135	YDR262W	chrIV	+	TATA-containing	TAF1-depleted	1112	993176	993124	-52	YDR262W	1722.8	0.000205959	0.241186553	0.125362215	0.061730711	0.875740391	0.01587102	0.068935136	0.157620154	0.311395521	1	TRUE
1128	1136	YDR264C	chrIV	-	TATA-less	TAF1-enriched	904	998363	998393	-30	YDR264C	2428.8	0.053891657	NA	NA	NA	NA	NA	NA	NA	NA	NA	NA
1129	1137	YDR265W	chrIV	+	TATA-less	TAF1-enriched	381	998691	998675	-16	YDR265W	167.4	0.020218805	0.277884429	0.023456844	0.529162288	0.726636697	0.416559943	0.025256364	0.064245058	0.529162288	2	TRUE
1130	1138	YDR266C	chrIV	-	TATA-less	TAF1-depleted	203	1002172	1002239	-67	YDR266C	1282	0.000438722	1	0.001862846	0.12133525	1	1	1	1	1	1	TRUE
1131	1139	YDR267C	chrIV	-	TATA-less	TAF1-enriched	384	1003652	1003696	-44	YDR267C	136.2	0.295467482	NA	NA	NA	NA	NA	NA	NA	NA	NA	NA
1132	1140	YDR268W	chrIV	+	TATA-less	TAF1-enriched	37	NA	1003728	NA	YDR268W	14.9	0.57882172	NA	NA	NA	NA	NA	NA	NA	NA	NA	NA
1133	1141	orphan	chrIV	+	TATA-less	TAF1-enriched	23	1005115	1005046	-69	orphan	13.9	0.487861865	NA	NA	NA	NA	NA	NA	NA	NA	NA	NA
1134	1142	CUT516	chrIV	-	TATA-less	TAF1-enriched	128	1005196	1005297	-101	CUT516	129.2	0.000926525	0.321694145	0.05653477	0.118156497	0.856424235	0.050754285	0.315703123	0.251526396	0.050311032	0	FALSE
1135	1143	YDR270W	chrIV	+	TATA-less	TAF1-depleted	63	1005591	1005588	-3	YDR270W	146.1	0.000302319	0.211693471	0.04316966	0.161303704	0.769392339	0.025825192	0.344833321	0.119713816	0.720104834	2	TRUE
1136	1144	YDR272W	chrIV	+	TATA-less	TAF1-enriched	941	1008985	1008953	-32	YDR272W	924.5	0.003178985	0.014817445	0.240683902	0.335072427	0.86263873	0.21333384	0.823964106	0.502801259	0.335072427	1	TRUE
1137	1145	CUT517	chrIV	-	TATA-less	TAF1-depleted	176	1011437	1011496	-59	CUT517	76.8	0.734154286	NA	NA	NA	NA	NA	NA	NA	NA	NA	NA
1138	1146	orphan	chrIV	-	TATA-containing	TAF1-enriched	172	1013127	1013159	-32	orphan	41.8	0.579867354	NA	NA	NA	NA	NA	NA	NA	NA	NA	NA
1139	1147	orphan	chrIV	+	TATA-less	TAF1-enriched	5	1013838	1013712	-126	orphan	58.7	0.884336948	NA	NA	NA	NA	NA	NA	NA	NA	NA	NA
1140	1148	YDR276C	chrIV	-	TATA-containing	TAF1-depleted	27574	1013617	1013662	-45	YDR276C	27814.7	0.00015752	0.016951735	0.166854052	0.138897663	1	0.012060176	1	1	0.0735091	2	TRUE
1141	1149	ST0641	chrIV	+	TATA-less	TAF1-enriched	198	1014333	1014326	-7	ST0641	67.2	0.006878369	0.001281654	0.03386916	0.473363469	0.95399473	0.038008139	0.525688381	0.205463024	0.525688381	3	TRUE
1142	1150	YDR277C	chrIV	-	TATA-containing	TAF1-depleted	2192	1015708	1015832	-124	YDR277C	153.6	0.004452014	1	0.002654029	1	1	1	1	1	1	1	TRUE
1143	1151	tE(CUC)D	chrIV	-	TATA-less	-	1425	1017262	1017290	-28	tE(CUC)D	183.5	0.953553096	NA	NA	NA	NA	NA	NA	NA	NA	NA	NA
1144	1152	CUT518	chrIV	-	TATA-less	TAF1-enriched	0	1020207	1020361	-154	CUT518	4.4	0.236772179	NA	NA	NA	NA	NA	NA	NA	NA	NA	NA
1145	1153	YDR280W	chrIV	+	TATA-less	TAF1-enriched	893	1020830	1020677	-153	YDR280W	674.6	0.00030727	0.122366979	0.129578776	0.092107091	0.234263442	0.053955613	0.115805488	0.252644937	0.549362679	0	FALSE
1146	1154	YDR281C	chrIV	-	TATA-less	TAF1-enriched	459	1022209	1022352	-143	YDR281C	2234.4	0.000338682	0.003902081	0.614706239	0.027408945	1	0.00440677	1	1	0.027408945	4	TRUE
1147	1155	orphan	chrIV	-	TATA-less	TAF1-enriched	2	1022704	1022738	-34	orphan	0.3	0.253517362	NA	NA	NA	NA	NA	NA	NA	NA	NA	NA
1148	1156	YDR282C	chrIV	-	TATA-containing	TAF1-enriched	121	1024741	1024762	-21	YDR282C	166.1	0.192984495	NA	NA	NA	NA	NA	NA	NA	NA	NA	NA
1149	1157	CUT076	chrIV	+	TATA-less	TAF1-enriched	7	1030553	1030554	1	CUT076	70.2	0.000839743	0.045383201	0.228720896	0.131532905	0.993424788	0.051543283	0.40522226	0.377218315	0.131532905	1	TRUE
1150	1158	YDR284C	chrIV	-	TATA-containing	TAF1-enriched	424	1031528	1031700	-172	YDR284C	5591.4	0.000138833	0.000422468	1	1	1	1	1	1	1	1	TRUE
1151	1159	YDR288W	chrIV	+	TATA-less	TAF1-enriched	276	1037209	1037156	-53	YDR288W	739.2	0.041835231	1	0.034777734	0.178958733	0.476766724	0.358326467	0.476766724	0.10794963	0.476766724	1	TRUE
1152	1160	YDR292C	chrIV	-	TATA-less	TAF1-enriched	45	NA	1045143	NA	YDR292C	481.8	0.000519401	0.282595885	0.081137131	0.06058988	0.452899082	0.015413246	0.133308703	0.628028122	1	1	TRUE
1153	1161	YDR293C	chrIV	-	TATA-less	TAF1-enriched	1067	1049310	1049444	-134	YDR293C	109.7	0.019927213	0.479014012	0.525982399	0.320441869	0.268450781	0.292227527	0.740505943	0.222427458	0.304957184	0	FALSE
1154	1162	orphan	chrIV	+	TATA-containing	TAF1-depleted	12	1050357	1050204	-153	orphan	100.7	0.145967415	NA	NA	NA	NA	NA	NA	NA	NA	NA	NA
1155	1163	YDR294C	chrIV	-	TATA-containing	TAF1-enriched	270	1052248	1052261	-13	YDR294C	536.8	0.00046501	0.15532909	0.138829445	0.175767894	0.151294749	0.045600656	0.151294749	0.536895668	0.081325496	1	TRUE
1156	1164	YDR295C	chrIV	-	TATA-less	TAF1-depleted	87	NA	1054910	NA	YDR295C	991.5	0.003580202	0.083070384	0.247915126	0.652955994	0.237031998	0.126880228	0.237031998	0.126880228	0.85464533	0	FALSE
1157	1165	YDR296W	chrIV	+	TATA-less	TAF1-enriched	875	1055208	1055159	-49	YDR296W	1360	0.002532953	0.003211774	0.526736048	1	1	0.354414454	1	1	1	1	TRUE
1158	1166	orphan	chrIV	+	TATA-containing	TAF1-enriched	24	NA	1056052	NA	orphan	12.3	0.385300633	NA	NA	NA	NA	NA	NA	NA	NA	NA	NA
1159	1167	YDR297W	chrIV	+	TATA-containing	TAF1-depleted	1648	1056528	1056510	-18	YDR297W	2898.5	0.000451923	0.087605262	0.140870199	0.287034153	0.208311037	0.024505324	0.208311037	0.933612625	0.113913581	1	TRUE
1160	1168	YDR298C	chrIV	-	TATA-less	TAF1-enriched	2244	1058923	1058971	-48	YDR298C	3280.1	0.000285893	0.0483212	0.106196666	0.115699078	0.895703765	0.030945554	0.358811	0.471982357	0.26516392	2	TRUE
1161	1169	YDR299W	chrIV	+	TATA-containing	TAF1-enriched	175	1059628	1059592	-36	YDR299W	305.1	0.001553206	0.147352755	0.041315272	0.381790562	0.517079871	0.368597764	0.285088658	0.402944002	0.080255803	1	TRUE
1162	1170	YDR300C	chrIV	-	TATA-less	TAF1-enriched	196	1062821	1062853	-32	YDR300C	3027.8	0.000204202	0.028059533	0.096116511	0.422534881	1	0.006338466	1	1	1	2	TRUE
1163	1171	YDR301W	chrIV	+	TATA-less	TAF1-enriched	976	1063322	1063277	-45	YDR301W	230.7	0.004631467	0.365196633	0.179217149	0.027310397	0.823391466	0.004381659	0.709911367	0.098110523	0.823391466	2	TRUE
1164	1172	ANT061	chrIV	+	TATA-less	TAF1-enriched	16	1071475	1071440	-35	ANT061	7.3	0.017844203	0.507748726	0.252601129	0.322416128	0.131092401	0.043332341	0.638925329	0.468451907	0.387546811	1	TRUE
1165	1173	YDR303C	chrIV	-	TATA-less	TAF1-enriched	5198	1071475	1071678	-203	YDR303C	941.2	0.005442563	0.054037687	0.352344645	0.439397204	0.439397204	0.31817667	0.777947503	0.192388026	0.439397204	0	FALSE
1166	1174	YDR305C	chrIV	-	TATA-less	TAF1-enriched	170	1073424	1073462	-38	YDR305C	644.3	0.003036654	1	0.013319545	0.537191844	0.537191844	0.425667397	0.064141499	0.016853763	0.537191844	2	TRUE
1167	1175	YDR307W	chrIV	+	TATA-less	TAF1-enriched	333	1075878	1075818	-60	YDR307W	1451.3	0.000358912	0.232073502	0.039261584	0.417938777	0.147564991	0.058660965	0.147564991	0.392230246	0.187745897	1	TRUE
1168	1176	YDR308C	chrIV	-	TATA-less	TAF1-depleted	594	1078450	1078490	-40	YDR308C	418.7	0.000908277	0.086787967	0.043481644	0.017800334	1	0.52389034	1	1	1	2	TRUE
1169	1177	YDR309C	chrIV	-	TATA-less	TAF1-depleted	1774	1080256	1080313	-57	YDR309C	1278.2	0.000842848	0.001738102	1	0.05629503	1	1	1	1	1	1	TRUE
1170	1178	ST0657	chrIV	+	TATA-containing	TAF1-depleted	61	1080869	1080797	-72	ST0657	59.2	0.017080494	1	1	1	0.098846123	0.230703712	0.121786358	1	0.00020436	1	TRUE
1171	1179	YDR310C	chrIV	-	TATA-less	TAF1-enriched	79	1084572	1084594	-22	YDR310C	86.6	0.002127536	0.036424243	0.281941664	0.10864966	0.294776375	0.069136874	0.512588069	0.88239168	0.394626559	1	TRUE
1172	1180	YDR311W	chrIV	+	TATA-less	TAF1-enriched	720	1085104	1085062	-42	YDR311W	174.3	0.000351532	0.252027534	0.034459294	0.233882085	0.385020263	0.026272272	0.948693989	0.157886392	0.233882085	2	TRUE
1173	1181	YDR312W	chrIV	+	TATA-less	TAF1-enriched	4842	1087572	1087549	-23	YDR312W	202.1	0.000280848	0.009116617	1	0.020044477	0.840368226	0.001536484	0.840368226	0.794836525	0.103166797	3	TRUE
1174	1182	YDR313C	chrIV	-	TATA-less	TAF1-enriched	187	1090097	1090151	-54	YDR313C	506.3	0.029785279	0.190474911	0.294942612	0.234723485	1	0.021386403	0.251256035	1	1	1	TRUE
1175	1183	YDR314C	chrIV	-	TATA-less	TAF1-enriched	93	1092529	1092574	-45	YDR314C	442.3	0.00041668	0.0269077	0.237925093	0.247898524	0.268299315	0.067923867	0.268299315	0.273382188	0.352773469	1	TRUE
1176	1184	YDR316W	chrIV	+	TATA-less	TAF1-enriched	398	1093792	1093759	-33	YDR316W	317.1	0.002818986	0.075856149	0.252879532	0.109908891	0.109908891	0.194340385	0.520394637	0.25947352	0.680331341	0	FALSE
1177	1185	tF(GAA)D	chrIV	-	TATA-containing	-	4474	1095437	1095472	-35	tF(GAA)D	347.5	NA	NA	NA	NA	NA	NA	NA	NA	NA	NA	NA
1178	1186	ST4345	chrIV	-	TATA-less	TAF1-enriched	372	1103539	1103541	-2	ST4345	113.6	0.133848444	NA	NA	NA	NA	NA	NA	NA	NA	NA	NA
1179	1187	YDR319C	chrIV	-	TATA-less	TAF1-enriched	438	NA	1105873	NA	YDR319C	896.3	0.004255044	0.217760793	1	0.024434061	0.024434061	0.823173902	0.386778229	0.025440573	0.024434061	4	TRUE
1180	1188	CUT081	chrIV	+	TATA-containing	TAF1-enriched	91	1106128	1106114	-14	CUT081	63.5	0.563676648	NA	NA	NA	NA	NA	NA	NA	NA	NA	NA
1181	1189	YDR320C	chrIV	-	TATA-less	TAF1-enriched	357	1108098	1108112	-14	YDR320C	581.1	0.000365522	0.056911707	0.085481282	1	0.544826851	0.029894245	0.501067418	0.192611203	0.544826851	1	TRUE
1182	1190	YDR321W	chrIV	+	TATA-less	TAF1-enriched	680	1108720	1108668	-52	YDR321W	4252.7	0.000599813	0.018110854	1	0.022712049	0.447604558	0.011081207	0.447604558	0.326888667	0.189615909	3	TRUE
1183	1191	YDR322W	chrIV	+	TATA-less	TAF1-enriched	3431	1110611	1110572	-39	YDR322W	825.1	0.00059977	0.180958863	0.090159403	0.5468536	0.444084305	0.027295101	0.234565639	0.265216325	0.087313017	1	TRUE
1184	1192	YDR322C-A	chrIV	-	TATA-less	TAF1-enriched	219	1112265	1112318	-53	YDR322C-A	4644.9	0.00121766	0.057824006	0.138325787	0.199641918	0.883829938	0.042046122	0.235953458	0.600288692	0.569879966	1	TRUE
1185	1193	YDR323C	chrIV	-	TATA-less	TAF1-enriched	8	1113856	1113988	-132	YDR323C	127.5	0.001051094	0.190622129	0.00523865	1	1	1	1	1	1	1	TRUE
1186	1194	YDR324C	chrIV	-	TATA-less	TAF1-enriched	284	1116674	1116708	-34	YDR324C	629.6	0.000269066	0.132961274	0.081762467	0.163516704	0.876966642	0.020084847	0.131704142	0.234566516	0.562911956	1	TRUE
1187	1195	YDR325W	chrIV	+	TATA-less	TAF1-enriched	185	1117148	1117112	-36	YDR325W	135.4	0.003210186	0.441893006	0.019261222	0.840352222	0.279934357	0.794816142	0.050055352	0.044476924	0.840352222	2	TRUE
1188	1196	YDR326C	chrIV	-	TATA-containing	TAF1-enriched	206	1125079	1125112	-33	YDR326C	244.6	0.000379101	0.022609673	0.030171088	1	1	0.459289706	1	1	1	2	TRUE
1189	1197	YDR328C	chrIV	-	TATA-less	TAF1-enriched	669	1126019	1126068	-49	YDR328C	6668.6	0.002525278	0.178779306	0.09429103	0.806088507	0.986943191	0.015114607	0.318150476	0.54008325	0.245269604	1	TRUE
1190	1198	YDR329C	chrIV	-	TATA-less	TAF1-enriched	291	1127581	1127622	-41	YDR329C	389.9	0.000146748	0.016069179	1	0.001136701	1	0.001436646	1	1	0.072577457	3	TRUE
1191	1199	YDR330W	chrIV	+	TATA-less	TAF1-enriched	530	1127845	1127813	-32	YDR330W	731.9	0.000171337	0.104146535	0.104146535	0.037812869	1	0.039005665	0.644419602	0.105823412	0.291461048	2	TRUE
1192	1200	YDR331W	chrIV	+	TATA-less	TAF1-enriched	3107	1129619	1129558	-61	YDR331W	512.4	0.000312495	0.181782934	0.039053476	0.727043491	0.295015141	0.019334674	0.727043491	0.127614072	0.727043491	2	TRUE
1193	1201	YDR332W	chrIV	+	TATA-less	TAF1-enriched	458	1131033	1131001	-32	YDR332W	162.7	0.001141969	0.085561721	0.243347482	0.043600154	0.736630245	0.0091843	0.736630245	1	0.043600154	3	TRUE
1194	1202	YDR333C	chrIV	-	TATA-less	TAF1-enriched	63	1135420	1135468	-48	YDR333C	1398.4	0.0001961	0.026168523	0.138215871	0.1043839	1	0.036035552	1	0.431751928	0.1043839	2	TRUE
1195	1203	YDR334W	chrIV	+	TATA-less	TAF1-enriched	647	1135819	1135775	-44	YDR334W	130.2	0.000737851	0.381319475	0.014233748	1	0.05041632	1	0.007247013	0.503767848	1	2	TRUE
1196	1204	YDR335W	chrIV	+	TATA-less	TAF1-enriched	7885	1140850	1140811	-39	YDR335W	328.9	0.000684897	0.203661245	0.064855711	0.193141581	0.450680656	0.092952514	0.092447457	0.330169626	0.193141581	0	FALSE
1197	1205	orphan	chrIV	+	TATA-less	TAF1-enriched	275	1145246	1145085	-161	orphan	326.8	0.072704077	NA	NA	NA	NA	NA	NA	NA	NA	NA	NA
1198	1206	CUT522	chrIV	-	TATA-less	TAF1-enriched	25	1145893	1146019	-126	CUT522	36.5	0.002592193	0.004494662	1	0.091691799	0.889838843	0.075467293	0.178837291	0.681645608	0.763064604	1	TRUE
1199	1207	YDR337W	chrIV	+	TATA-less	TAF1-enriched	69	1146302	1146281	-21	YDR337W	830.7	0.004393962	0.156346207	0.025094228	0.810622399	0.323521334	0.328295498	0.472221319	0.757053638	0.810622399	1	TRUE
1200	1208	CUT082	chrIV	+	TATA-less	TAF1-enriched	17	1149706	1149585	-121	CUT082	4	0.766098018	NA	NA	NA	NA	NA	NA	NA	NA	NA	NA
1201	1209	YDR339C	chrIV	-	TATA-less	TAF1-enriched	327	1150508	1150538	-30	YDR339C	2618.4	0.00110063	0.05832157	0.206883297	0.429477336	0.429477336	0.09741938	0.18790212	0.115835674	0.692811022	0	FALSE
1202	1210	tX(XXX)D	chrIV	-	TATA-less	-	369	1150929	1150952	-23	tX(XXX)D	8.4	0.053583799	NA	NA	NA	NA	NA	NA	NA	NA	NA	NA
1203	1211	YDR341C	chrIV	-	TATA-less	TAF1-enriched	468	1153618	1153647	-29	YDR341C	6108.5	0.00051924	0.115109417	0.195026745	0.333112285	0.13779349	0.031953874	0.070812265	0.227102333	1	1	TRUE
1204	1212	CUT083	chrIV	+	TATA-less	TAF1-enriched	38	1153928	1153894	-34	CUT083	31.8	0.0721827	NA	NA	NA	NA	NA	NA	NA	NA	NA	NA
1205	1213	YDR345C	chrIV	-	TATA-containing	TAF1-depleted	7416	1164568	1164692	-124	YDR345C	7538	0.000138833	0.000422468	1	1	1	1	1	1	1	1	TRUE
1206	1214	orphan	chrIV	-	TATA-less	TAF1-enriched	15	1165545	1165595	-50	orphan	6.9	0.37671406	NA	NA	NA	NA	NA	NA	NA	NA	NA	NA
1207	1215	YDR347W	chrIV	+	TATA-less	TAF1-enriched	255	1169124	1169102	-22	YDR347W	861.1	0.006935132	0.379753963	0.08154132	0.012303808	0.519462627	0.008235684	0.902652314	0.520781741	0.16321156	2	TRUE
1208	1216	YDR348C	chrIV	-	TATA-less	TAF1-depleted	1205	1171974	1172022	-48	YDR348C	155.8	0.001440698	0.639979161	0.001006469	0.742732314	0.118493505	0.402497348	0.047993152	0.118606555	0.548217084	2	TRUE
1209	1217	YDR349C	chrIV	-	TATA-less	TAF1-enriched	230	1174227	1174248	-21	YDR349C	1917	0.002057449	0.096257253	0.032665734	0.795624684	0.795624684	0.738088887	0.502945147	0.738088887	0.10987847	1	TRUE
1210	1218	ST0685	chrIV	+	TATA-less	TAF1-enriched	24	NA	1174481	NA	ST0685	326.4	0.000798612	0.013260511	0.251077242	0.625532709	0.117974592	0.528670694	0.194067287	0.189025985	0.625532709	1	TRUE
1211	1219	orphan	chrIV	+	TATA-less	TAF1-enriched	6	1175029	1175014	-15	orphan	141.7	0.000820527	0.507821536	0.009595666	0.205695472	0.493256661	0.013654697	0.123671048	0.322873719	0.056091155	2	TRUE
1212	1220	ST4366	chrIV	-	TATA-less	TAF1-enriched	162	1174791	1174821	-30	ST4366	187.5	0.007590249	0.706509436	0.018397525	0.193521009	0.125182593	0.480084204	0.808693059	0.112743408	0.584382364	1	TRUE
1213	1221	YDR350C	chrIV	-	TATA-less	TAF1-enriched	1754	1178006	1178160	-154	YDR350C	156.6	0.000142847	0.004122607	1	0.020373038	1	0.002750391	1	1	0.043370141	4	TRUE
1214	1222	YDR351W	chrIV	+	TATA-less	TAF1-depleted	1131	1178488	1178445	-43	YDR351W	83.1	0.002013707	0.145094947	0.027200877	0.807523061	0.101389885	0.494443911	0.485637022	0.334425964	0.807523061	1	TRUE
1215	1223	CUT524	chrIV	-	TATA-less	TAF1-enriched	15	1182966	1182991	-25	CUT524	53.5	0.111183414	NA	NA	NA	NA	NA	NA	NA	NA	NA	NA
1216	1224	YDR353W	chrIV	+	TATA-less	TAF1-enriched	12204	1183295	1183251	-44	YDR353W	4605.1	0.000205916	0.017894194	0.141054411	0.400218603	1	0.012817292	1	1	0.092479333	2	TRUE
1217	1225	YDR354W	chrIV	+	TATA-less	TAF1-enriched	1001	1184757	1184671	-86	YDR354W	1257.7	0.000142449	1	0.00042799	1	1	1	1	1	1	1	TRUE
1218	1226	orphan	chrIV	+	TATA-less	TAF1-enriched	191	1186133	1186096	-37	orphan	251.4	0.000691107	0.048247533	0.092130764	0.674980592	0.208403713	0.374647183	0.208403713	0.104369761	0.674980592	1	TRUE
1219	1227	YDR357C	chrIV	-	TATA-less	TAF1-depleted	137	1189517	1189565	-48	YDR357C	1568.5	0.000784986	0.334738219	0.04074154	0.029450397	0.290656916	0.054575604	0.369943958	0.983509504	0.116645119	2	TRUE
1220	1228	YDR358W	chrIV	+	TATA-containing	TAF1-depleted	2471	1190062	1190025	-37	YDR358W	403.5	0.007348785	0.054637364	0.151978919	1	0.338619929	0.520626208	0.338619929	0.473681901	1	0	FALSE
1221	1229	YDR359C	chrIV	-	TATA-less	TAF1-depleted	117	1195277	1195403	-126	YDR359C	25.6	0.518605952	NA	NA	NA	NA	NA	NA	NA	NA	NA	NA
1222	1230	YDR361C	chrIV	-	TATA-less	TAF1-depleted	442	1196250	1196297	-47	YDR361C	2071.2	0.001949205	0.103448299	0.029919957	1	1	0.095398835	1	1	1	1	TRUE
1223	1231	YDR362C	chrIV	-	TATA-less	TAF1-enriched	312	1198899	1198956	-57	YDR362C	67.7	NA	NA	NA	NA	NA	NA	NA	NA	NA	NA	NA
1224	1232	YDR363W	chrIV	+	TATA-less	TAF1-enriched	213	1199053	1199007	-46	YDR363W	450.7	0.001640547	0.020123196	0.450282665	0.412848189	0.030403542	0.941591085	0.030403542	0.271744784	0.954740463	3	TRUE
1225	1233	tK(CUU)D1	chrIV	+	TATA-less	-	272	1201755	1201739	-16	tK(CUU)D1	72.7	NA	NA	NA	NA	NA	NA	NA	NA	NA	NA	NA
1226	1234	YDR363W-A	chrIV	+	TATA-less	TAF1-enriched	823	NA	1202106	NA	YDR363W-A	5809.7	0.000191085	0.181685385	0.048658039	0.875436929	0.045177618	0.839626316	0.045177618	0.009713696	0.875436929	4	TRUE
1227	1235	YDR364C	chrIV	-	TATA-less	TAF1-enriched	63	1204168	1204233	-65	YDR364C	350.8	0.002281457	0.201356392	0.088456666	0.640822678	0.205388905	0.168600956	0.095664437	0.322412425	0.286244033	0	FALSE
1228	1236	YDR365C	chrIV	-	TATA-less	TAF1-enriched	331	1206390	1206458	-68	YDR365C	4493.4	0.000247782	0.013296185	1	0.432417125	0.453629699	0.007540441	0.086737767	1	0.068771673	2	TRUE
1229	1237	YDR367W	chrIV	+	TATA-less	TAF1-enriched	399	1212852	1212805	-47	YDR367W	939.1	0.069848969	NA	NA	NA	NA	NA	NA	NA	NA	NA	NA
1230	1238	YDR368W	chrIV	+	TATA-less	TAF1-enriched	1445	1213929	1213853	-76	YDR368W	567.4	0.000331852	0.005538704	1	0.031240878	1	0.001482711	1	1	0.218378224	3	TRUE
1231	1239	orphan	chrIV	-	TATA-less	TAF1-depleted	34	1217550	1217572	-22	orphan	107.3	0.005544996	0.380131962	0.055872329	0.122312232	0.122312232	0.046068181	0.450007739	0.790263025	0.122312232	1	TRUE
1232	1240	YDR370C	chrIV	-	TATA-containing	TAF1-enriched	81	1219097	1219114	-17	YDR370C	345.2	0.000617453	0.176380235	0.112487194	0.215140593	0.253053162	0.009381786	0.253053162	0.692939916	0.393548872	1	TRUE
1233	1241	YDR371W	chrIV	+	TATA-less	TAF1-enriched	44	1219390	1219373	-17	YDR371W	297.8	0.001059996	0.046683199	0.071905015	0.815399315	0.815399315	0.76310665	0.483678175	0.034873336	0.815399315	2	TRUE
1234	1242	YDR372C	chrIV	-	TATA-less	TAF1-enriched	144	1222399	1222412	-13	YDR372C	1872.6	0.000247632	0.384763951	0.036451259	0.033159987	0.401387166	0.039160158	0.155580348	0.307333409	0.332921608	3	TRUE
1235	1243	YDR373W	chrIV	+	TATA-less	TAF1-depleted	172	1222718	1222699	-19	YDR373W	417.6	0.00171465	0.001655877	1	1	1	0.338184109	1	1	0.165128413	1	TRUE
1236	1244	YDR374W-A	chrIV	+	TATA-less	TAF1-enriched	159	1224797	1224739	-58	YDR374W-A	284.7	0.09728793	NA	NA	NA	NA	NA	NA	NA	NA	NA	NA
1237	1245	YDR375C	chrIV	-	TATA-less	TAF1-enriched	319	1226535	1226552	-17	YDR375C	192.4	0.001119356	0.148120967	0.281499103	0.710802884	0.091920182	0.009029371	0.105675445	0.930646604	0.710802884	1	TRUE
1238	1246	YDR377W	chrIV	+	TATA-less	TAF1-depleted	325	1228579	1228544	-35	YDR377W	1035.8	0.000404512	0.140228434	0.026938256	1	0.106155557	0.434093794	0.059429442	0.139541836	0.500810308	1	TRUE
1239	1247	YDR378C	chrIV	-	TATA-less	TAF1-enriched	888	1229571	1229613	-42	YDR378C	8850.7	0.000133552	1	0.000414279	1	1	1	1	1	1	1	TRUE
1240	1248	YDR379W	chrIV	+	TATA-less	TAF1-enriched	91	1230266	1230123	-143	YDR379W	65.8	0.080890601	NA	NA	NA	NA	NA	NA	NA	NA	NA	NA
1241	1249	ST4385	chrIV	-	TATA-less	TAF1-enriched	447	1236142	1236163	-21	ST4385	90.7	0.488821594	NA	NA	NA	NA	NA	NA	NA	NA	NA	NA
1242	1250	YDR381W	chrIV	+	TATA-containing	TAF1-depleted	1132	1236648	1236461	-187	YDR381W	3279.4	0.000234648	0.009551041	1	0.357171355	1	0.000247165	1	1	0.03829073	3	TRUE
1243	1251	YDR381C-A	chrIV	-	TATA-containing	TAF1-enriched	207	1238962	1238997	-35	YDR381C-A	83.2	0.012453442	0.521670056	0.047487482	0.896098092	0.160359436	0.057870578	0.227056588	0.704438812	0.141789477	1	TRUE
1244	1252	orphan	chrIV	-	TATA-less	TAF1-enriched	119	1238962	1239033	-71	orphan	29.4	0.182394954	NA	NA	NA	NA	NA	NA	NA	NA	NA	NA
1245	1253	YDR382W	chrIV	+	TATA-less	TAF1-depleted	27041	1239585	1239411	-174	YDR382W	105573.2	0.000141538	0.000426605	1	1	1	1	1	1	1	1	TRUE
1246	1254	CUT088	chrIV	+	TATA-less	TAF1-enriched	107	1240317	1240183	-134	CUT088	88	0.161245414	NA	NA	NA	NA	NA	NA	NA	NA	NA	NA
1247	1255	YDR384C	chrIV	-	TATA-less	TAF1-depleted	2245	NA	1242146	NA	YDR384C	349.2	0.003520176	0.015694295	0.011283334	0.290510809	0.148654595	0.038180036	0.462794501	0.639248343	0.248571394	3	TRUE
1248	1256	CUT089	chrIV	+	TATA-less	TAF1-enriched	58	1242852	1242725	-127	CUT089	44.9	0.011156286	0.130119401	0.389407559	0.371282576	0.637340434	0.023419851	0.139064102	0.768904974	0.199066864	1	TRUE
1249	1258	YDR385W	chrIV	+	TATA-less	TAF1-depleted	55859	1243221	1243145	-76	YDR385W	33418.7	0.00020862	0.116429928	0.040073194	0.221069589	0.175105643	0.454948166	0.112402079	0.063267945	1	1	TRUE
1250	1259	YDR386W	chrIV	+	TATA-less	TAF1-enriched	309	NA	1246063	NA	YDR386W	146.8	0.000972851	0.352248483	0.030730115	0.120378022	0.60464693	0.005999488	0.397303519	0.503887189	0.388201964	2	TRUE
1251	1260	YDR387C	chrIV	-	TATA-less	TAF1-enriched	937	1249906	1249918	-12	YDR387C	703.4	0.03083995	0.103147629	0.140731628	0.553682495	0.189097942	0.444514053	0.661566962	0.57198275	0.924778045	0	FALSE
1252	1261	YDR388W	chrIV	+	TATA-less	TAF1-enriched	686	1250199	1250135	-64	YDR388W	4297.9	0.183712715	NA	NA	NA	NA	NA	NA	NA	NA	NA	NA
1253	1262	orphan	chrIV	-	TATA-less	TAF1-enriched	27	1251618	1251661	-43	orphan	14.8	0.165259436	NA	NA	NA	NA	NA	NA	NA	NA	NA	NA
1254	1263	orphan	chrIV	+	TATA-less	TAF1-enriched	529	1252041	1252012	-29	orphan	748	0.000469717	0.258830025	0.137348478	0.053775577	0.654460187	0.025238969	0.128070762	0.481504113	0.053775577	1	TRUE
1255	1264	YDR390C	chrIV	-	TATA-less	TAF1-enriched	14170	1257072	1257079	-7	YDR390C	1067.8	NA	NA	NA	NA	NA	NA	NA	NA	NA	NA	NA
1256	1265	orphan	chrIV	-	TATA-containing	TAF1-enriched	7341	1258062	1258063	-1	orphan	4109.8	0.001351956	0.048037579	0.338753916	0.159729853	0.490262638	0.039099215	0.490262638	0.3731193	0.159729853	2	TRUE
1257	1266	YDR392W	chrIV	+	TATA-less	TAF1-enriched	333	1258682	1258659	-23	YDR392W	354.2	0.028722826	0.632253247	0.018878363	0.161307634	0.38974986	0.295146351	0.812235222	0.857332771	0.812235222	1	TRUE
1258	1267	YDR393W	chrIV	+	TATA-less	TAF1-enriched	41	1259886	1259884	-2	YDR393W	481.6	0.000569601	0.190846365	0.049748612	0.234565639	0.121884408	0.124887226	0.198310595	0.412305226	0.234565639	1	TRUE
1259	1268	ST4395	chrIV	-	TATA-less	TAF1-depleted	57	1261353	1261373	-20	ST4395	454.2	0.000153921	0.010962276	1	0.050203865	1	0.000321147	1	1	0.023853049	3	TRUE
1260	1269	YDR394W	chrIV	+	TATA-less	TAF1-enriched	2536	1261633	1261587	-46	YDR394W	3613.3	0.000252121	0.290891011	0.013724502	0.179670641	0.174514803	0.107890671	0.34719585	0.224904547	0.601499245	1	TRUE
1261	1270	YDR395W	chrIV	+	TATA-less	TAF1-enriched	2045	1263255	1263216	-39	YDR395W	1381.3	0.000419904	0.041315272	0.131532438	0.29993854	0.871334745	0.180831277	0.173674339	0.132202024	0.29993854	1	TRUE
1262	1271	YDR397C	chrIV	-	TATA-containing	TAF1-depleted	295	1266856	1266957	-101	YDR397C	2449.6	0.000253325	0.030173254	0.176068875	0.21265263	1	0.013186702	1	0.338725685	0.138315863	2	TRUE
1263	1272	YDR398W	chrIV	+	TATA-less	TAF1-enriched	1622	1267460	1267434	-26	YDR398W	1122.2	0.000264052	0.321760025	0.035881706	0.046014996	0.434132158	0.041341926	0.196036755	0.257054631	0.362908684	3	TRUE
1264	1273	orphan	chrIV	-	TATA-containing	TAF1-enriched	186	1269380	1269395	-15	orphan	21.9	0.103209407	NA	NA	NA	NA	NA	NA	NA	NA	NA	NA
1265	1274	CUT528	chrIV	-	TATA-less	TAF1-enriched	17	1269380	1269484	-104	CUT528	23.5	0.039288067	0.054614988	1	0.885857702	0.028880501	0.621175888	0.860728337	0.550414181	0.066621397	1	TRUE
1266	1275	YDR399W	chrIV	+	TATA-less	TAF1-depleted	18636	1270126	1270004	-122	YDR399W	3181.4	0.000814022	0.883385662	0.073537597	0.121010332	0.124911868	0.045311916	0.124911868	0.747813193	0.121010332	1	TRUE
1267	1276	YDR400W	chrIV	+	TATA-less	TAF1-enriched	645	NA	1271039	NA	YDR400W	1855.7	0.000461436	0.371359463	0.044289344	0.020986096	1	0.001701374	1	0.343050188	1	3	TRUE
1268	1277	YDR404C	chrIV	-	TATA-less	TAF1-enriched	21534	1277297	1277361	-64	YDR404C	2064.3	0.000314049	0.567722102	0.071160634	0.056031856	0.210607961	0.04120083	0.106465352	0.225457814	0.210607961	1	TRUE
1269	1278	YDR405W	chrIV	+	TATA-less	TAF1-enriched	41	1277654	1277574	-80	YDR405W	227.9	0.000657017	0.200645839	0.063828129	0.107108056	0.302423368	0.009895244	0.498559424	0.617601867	0.175890756	1	TRUE
1270	1279	orphan	chrIV	-	TATA-containing	TAF1-enriched	11	1278436	1278504	-68	orphan	7.9	0.15004148	NA	NA	NA	NA	NA	NA	NA	NA	NA	NA
1271	1280	YDR406W	chrIV	+	TATA-containing	TAF1-depleted	2003	1279204	1279084	-120	YDR406W	1667.6	0.000573774	0.029392325	0.680274261	0.325384828	0.448605439	0.118518452	0.09679711	0.032048581	0.214455384	2	TRUE
1272	1281	ST4401	chrIV	-	TATA-less	TAF1-enriched	232	1279881	1279925	-44	ST4401	156.5	0.02819159	0.067007852	0.608053466	0.241292882	0.910537432	0.031151448	0.268053938	0.96694125	0.241292882	1	TRUE
1273	1282	YDR407C	chrIV	-	TATA-containing	TAF1-enriched	139	1287991	1288014	-23	YDR407C	612	0.00035802	0.012776241	0.248550381	0.215322556	0.600349015	0.030937203	0.600349015	0.498818274	0.459232748	2	TRUE
1274	1283	orphan	chrIV	+	TATA-containing	TAF1-enriched	1603	1288290	1288266	-24	orphan	73.1	0.002413204	0.092293355	0.130951523	0.829430624	0.266297933	0.780919207	0.018646886	0.060094406	0.829430624	1	TRUE
1275	1284	YDR408C	chrIV	-	TATA-less	TAF1-enriched	1207	1288906	1288915	-9	YDR408C	2752	0.003122951	0.007877347	0.793999801	0.050959352	0.346060128	0.02823856	0.346060128	0.811147671	0.346060128	2	TRUE
1276	1285	YDR409W	chrIV	+	TATA-less	TAF1-enriched	185	1289399	1289376	-23	YDR409W	180	NA	NA	NA	NA	NA	NA	NA	NA	NA	NA	NA
1277	1286	orphan	chrIV	+	TATA-less	TAF1-enriched	47	1292599	1292536	-63	orphan	28.2	0.025926355	0.671846435	0.029517452	0.025599944	0.048131991	0.151078611	0.16147063	0.084537525	0.018263099	4	TRUE
1278	1287	YDR410C	chrIV	-	TATA-containing	TAF1-enriched	648	1293099	1293109	-10	YDR410C	391.7	0.000261726	0.181868971	0.080055717	0.148122646	0.199246676	0.061897522	0.107684514	0.172705902	0.407263875	0	FALSE
1279	1288	YDR411C	chrIV	-	TATA-less	TAF1-enriched	4640	1294391	1294444	-53	YDR411C	2819.2	0.000214407	0.388608683	0.025768637	0.096734486	0.181801239	0.032016341	0.31270433	0.514613681	0.096734486	2	TRUE
1280	1289	YDR412W	chrIV	+	TATA-less	TAF1-enriched	343	1294687	1294640	-47	YDR412W	1233	0.003852647	0.082060911	0.246360718	0.165490591	0.375847958	0.080592185	0.375847958	0.218864318	0.375847958	0	FALSE
1281	1290	orphan	chrIV	+	TATA-less	TAF1-enriched	457	1297046	1297001	-45	orphan	20	0.825657672	NA	NA	NA	NA	NA	NA	NA	NA	NA	NA
1282	1291	YDR415C	chrIV	-	TATA-less	TAF1-enriched	885	1298174	1298189	-15	YDR415C	166.9	0.007091302	0.579541328	0.017055282	0.761532984	0.237938736	0.695223788	0.237938736	0.13314678	0.237938736	1	TRUE
1283	1292	YDR416W	chrIV	+	TATA-less	TAF1-enriched	73	1298388	1298369	-19	YDR416W	332.3	0.000224243	0.046506031	0.465421058	0.038289536	1	0.00056301	1	1	0.058756626	3	TRUE
1284	1293	CUT532	chrIV	-	TATA-less	TAF1-enriched	60	1300930	1300968	-38	CUT532	39.5	0.087442896	NA	NA	NA	NA	NA	NA	NA	NA	NA	NA
1285	1294	orphan	chrIV	+	TATA-less	TAF1-enriched	29	1301424	1301281	-143	orphan	18.9	0.06626763	NA	NA	NA	NA	NA	NA	NA	NA	NA	NA
1286	1295	YDR418W	chrIV	+	TATA-less	TAF1-enriched	133605	1301639	1301582	-57	YDR418W	39718.8	0.000383342	0.082182908	0.494702933	0.13464196	1	0.013966371	0.13464196	0.147466303	0.056902745	1	TRUE
1287	1296	YDR420W	chrIV	+	TATA-less	TAF1-enriched	1047	1306040	1306017	-23	YDR420W	391.3	0.006068883	0.185201485	0.082740931	0.50040805	0.050887062	0.517713575	0.378217345	0.384336565	0.50040805	0	FALSE
1288	1297	YDR422C	chrIV	-	TATA-less	TAF1-enriched	680	NA	1317829	NA	YDR422C	965.7	0.001201923	0.047315685	0.749033934	0.043896905	0.127397031	0.103369461	0.127397031	0.571711663	0.661343118	2	TRUE
1289	1298	orphan	chrIV	+	TATA-less	TAF1-enriched	10	1318265	1318142	-123	orphan	12.3	0.058919047	NA	NA	NA	NA	NA	NA	NA	NA	NA	NA
1290	1299	YDR423C	chrIV	-	TATA-less	TAF1-enriched	129	1319188	1319219	-31	YDR423C	1318.1	0.000183546	0.046470472	0.127858342	0.275463233	0.188477603	0.159155767	0.123651857	0.192099512	0.275463233	1	TRUE
1291	1300	YDR424C	chrIV	-	TATA-less	TAF1-enriched	295	1319831	1319877	-46	YDR424C	1901.6	0.000261098	0.066640792	0.103734042	0.170957309	0.632663169	0.055624173	0.114159478	0.374002117	0.311216248	0	FALSE
1292	1301	YDR427W	chrIV	+	TATA-less	TAF1-enriched	1227	1322221	1322173	-48	YDR427W	345.1	0.000187662	0.036981724	0.164333454	0.061540029	1	0.004228307	1	1	0.11124585	2	TRUE
1293	1302	YDR429C	chrIV	-	TATA-less	TAF1-enriched	1552	1325280	1325319	-39	YDR429C	9062.2	0.000500763	0.01372324	0.701730647	0.048837098	1	0.002576155	0.40142509	1	0.422207636	3	TRUE
1294	1303	YDR432W	chrIV	+	TATA-less	TAF1-enriched	16083	1328815	1328759	-56	YDR432W	37505.4	0.000304033	0.039166982	0.059073463	0.011493451	1	0.520440978	1	1	1	2	TRUE
1295	1304	YDR434W	chrIV	+	TATA-containing	TAF1-enriched	267	1331177	1331141	-36	YDR434W	1006.1	0.000158451	0.090093262	0.117693488	0.010146895	1	0.004264378	1	1	1	2	TRUE
1296	1305	CUT094	chrIV	+	TATA-less	TAF1-enriched	1087	1334338	1334253	-85	CUT094	116.2	0.081098364	NA	NA	NA	NA	NA	NA	NA	NA	NA	NA
1297	1306	YDR436W	chrIV	+	TATA-less	TAF1-depleted	778	1334724	1334576	-148	YDR436W	197.1	0.000146491	0.004126571	1	0.030041953	1	0.002753254	1	1	0.030041953	4	TRUE
1298	1307	YDR437W	chrIV	+	TATA-less	TAF1-enriched	45	1337294	1337268	-26	YDR437W	359.8	0.000142115	1	0.003040559	1	0.010377142	1	0.010377142	1	1	3	TRUE
1299	1308	YDR439W	chrIV	+	TATA-less	TAF1-enriched	70	1339629	1339467	-162	YDR439W	41.9	0.367568085	NA	NA	NA	NA	NA	NA	NA	NA	NA	NA
1300	1309	YDR441C	chrIV	-	TATA-containing	TAF1-enriched	1875	1345019	1345103	-84	YDR441C	593.5	0.009905325	0.107238618	0.003926919	0.833624362	0.285934853	0.080741078	0.132582055	0.508176095	0.034948281	2	TRUE
1301	1310	YDR443C	chrIV	-	TATA-less	TAF1-enriched	81	1349969	1349985	-16	YDR443C	414.3	0.000458846	0.12382323	0.069156786	0.222388396	0.289304356	0.034499628	0.676358469	0.245752532	0.319528263	1	TRUE
1302	1311	YDR444W	chrIV	+	TATA-less	TAF1-enriched	256	1350266	1350225	-41	YDR444W	212.9	0.000742213	0.216461451	0.050054274	0.033170553	0.778940994	0.003046563	0.778940994	0.982993143	0.43771876	2	TRUE
1303	1312	YDR447C	chrIV	-	TATA-less	TAF1-enriched	767	1355525	1355588	-63	YDR447C	3652.1	0.001105442	0.005530051	0.376612381	0.358385141	0.854257199	0.235737093	0.155777374	0.604876644	0.358385141	1	TRUE
1304	1313	YDR448W	chrIV	+	TATA-containing	TAF1-depleted	143	1356060	1356029	-31	YDR448W	210.6	0.00339822	0.008749556	1	0.218389921	1	0.004997377	1	1	0.218389921	2	TRUE
1305	1314	YDR449C	chrIV	-	TATA-less	TAF1-enriched	253	1358892	1358941	-49	YDR449C	1251.9	0.000531325	0.003641028	1	0.430741734	0.699808228	0.033923564	0.247379398	0.135347581	0.233941588	2	TRUE
1306	1315	CUT095	chrIV	+	TATA-less	TAF1-enriched	15	1359178	1359173	-5	CUT095	6.9	0.403042375	NA	NA	NA	NA	NA	NA	NA	NA	NA	NA
1307	1316	YDR450W	chrIV	+	TATA-less	TAF1-enriched	7257	NA	1359900	NA	YDR450W	44626.4	0.000136081	0.043456848	0.021012343	1	1	1	0.039973546	1	1	3	TRUE
1308	1317	YDR451C	chrIV	-	TATA-containing	TAF1-depleted	235	1362097	1362239	-142	YDR451C	132.2	0.000336382	0.262456365	0.064677221	0.266379069	0.752621624	0.009560878	0.148960497	0.684080441	0.044725478	2	TRUE
1309	1318	YDR452W	chrIV	+	TATA-less	TAF1-enriched	276	1362762	1362744	-18	YDR452W	1828.4	0.000203637	0.128018081	0.033109767	1	0.095469054	0.666849095	0.095469054	0.070606332	0.256914065	1	TRUE
1310	1319	orphan	chrIV	+	TATA-less	TAF1-enriched	2	1365503	1365385	-118	orphan	0.7	0.256944127	NA	NA	NA	NA	NA	NA	NA	NA	NA	NA
1311	1320	YDR453C	chrIV	-	TATA-less	TAF1-depleted	1886	1365633	1365725	-92	YDR453C	213.9	0.000549503	0.014680734	0.425574668	1	1	0.007984159	1	0.573153287	0.069001563	2	TRUE
1312	1321	YDR454C	chrIV	-	TATA-less	TAF1-enriched	346	1366821	1366843	-22	YDR454C	3652	0.002395762	0.076550849	0.225597609	0.247169598	0.247169598	0.135174223	0.247169598	0.613330351	0.247169598	0	FALSE
1313	1322	CUT097	chrIV	+	TATA-less	TAF1-enriched	49	1367245	1367092	-153	CUT097	20.6	0.025050218	0.255134235	0.321161501	0.09489994	0.035587733	0.893315035	0.683614418	0.307110149	0.719153376	1	TRUE
1314	1323	YDR456W	chrIV	+	TATA-less	TAF1-enriched	495	1367487	1367457	-30	YDR456W	635.5	0.000246811	0.073290802	0.109793716	0.014188748	1	0.014589223	1	0.651053074	1	2	TRUE
1315	1324	YDR457W	chrIV	+	TATA-less	TAF1-depleted	86	1369870	1369710	-160	YDR457W	877.9	0.000500714	0.046185738	0.479293675	0.026472746	0.698400646	0.00417033	0.698400646	0.616909651	0.129849452	3	TRUE
1316	1325	YDR458C	chrIV	-	TATA-less	TAF1-enriched	65	1382010	1382072	-62	YDR458C	251.7	0.003126453	0.06920023	0.1349876	0.110209659	0.778768977	0.181320218	0.85353733	0.209912919	0.445757471	0	FALSE
1317	1326	YDR459C	chrIV	-	TATA-less	TAF1-enriched	297	1383493	1383539	-46	YDR459C	324.6	0.001054202	0.059609001	0.021320008	0.818656291	0.40053296	0.767237022	0.818656291	0.729851761	0.818656291	1	TRUE
1318	1327	YDR460W	chrIV	+	TATA-less	TAF1-enriched	5576	1383733	1383699	-34	YDR460W	630.6	0.009061213	0.041475477	0.17090352	0.453254705	0.211299547	0.332921608	0.933586496	0.590636178	0.047330208	2	TRUE
1319	1328	CUT534	chrIV	-	TATA-less	TAF1-enriched	352	1384677	1384764	-87	CUT534	29.6	0.088828814	NA	NA	NA	NA	NA	NA	NA	NA	NA	NA
1320	1329	YDR461W	chrIV	+	TATA-containing	TAF1-depleted	35301	NA	1385153	NA	YDR461W	2342.8	0.000328636	0.197318437	0.494324573	0.041166387	1	0.008388544	1	1	0.041166387	3	TRUE
1321	1330	YDR461C-A	chrIV	-	TATA-less	TAF1-enriched	514	1385761	1385785	-24	YDR461C-A	414.8	0.000328469	0.07817333	0.094265228	0.342788013	0.39410537	0.058893355	0.39410537	0.101027789	0.449816554	0	FALSE
1322	1331	YDR462W	chrIV	+	TATA-less	TAF1-enriched	324	1386074	1386039	-35	YDR462W	1173	0.00550815	0.404177035	0.044936204	0.193459659	0.699045624	0.093186116	0.121999214	0.617701756	0.193459659	1	TRUE
1323	1332	YDR463W	chrIV	+	TATA-less	TAF1-enriched	2456	1386833	1386780	-53	YDR463W	179.2	0.00045037	0.084065793	0.1206903	0.17030381	0.331904787	0.076685824	0.196689989	0.356863974	0.17030381	0	FALSE
1324	1333	YDR464W	chrIV	+	TATA-less	TAF1-enriched	55	NA	1388745	NA	YDR464W	731.4	0.001654322	0.014430026	0.275469471	0.255062853	0.70440619	0.040082907	0.255062853	0.958445909	0.916427615	2	TRUE
1325	1334	YDR465C	chrIV	-	TATA-less	TAF1-enriched	1281	1394561	1394602	-41	YDR465C	2477.1	0.002266008	0.013329274	0.714802499	0.591437822	0.655757312	0.005000241	0.655757312	0.564954905	0.591437822	2	TRUE
1326	1335	orphan	chrIV	-	TATA-less	TAF1-enriched	8	1394928	1394998	-70	orphan	0.9	0.163999482	NA	NA	NA	NA	NA	NA	NA	NA	NA	NA
1327	1336	YDR466W	chrIV	+	TATA-less	TAF1-enriched	251	1394809	1394786	-23	YDR466W	7.8	0.030198712	0.071982688	0.464538941	0.948893707	0.261997781	0.206983851	0.235710044	0.222264515	0.500941536	0	FALSE
1328	1337	YDR468C	chrIV	-	TATA-less	TAF1-depleted	141	1398754	1398806	-52	YDR468C	817.3	0.001181484	0.147931404	0.204188556	0.109344268	0.909862129	0.038727327	0.169217478	0.403615925	0.109344268	1	TRUE
1329	1338	orphan	chrIV	-	TATA-less	TAF1-enriched	0	NA	1399225	NA	orphan	0.3	0.670383742	NA	NA	NA	NA	NA	NA	NA	NA	NA	NA
1330	1339	YDR471W	chrIV	+	TATA-less	TAF1-enriched	2351	1401766	1401700	-66	YDR471W	21798.9	0.000145992	0.043456848	1	0.002062836	1	0.000130978	1	1	1	3	TRUE
1331	1340	orphan	chrIV	-	TATA-less	TAF1-enriched	3	NA	1402650	NA	orphan	16.8	0.090339415	NA	NA	NA	NA	NA	NA	NA	NA	NA	NA
1332	1341	orphan	chrIV	+	TATA-containing	TAF1-depleted	7470	1403017	1402919	-98	orphan	167930.7	NA	NA	NA	NA	NA	NA	NA	NA	NA	NA	NA
1333	1342	YDR472W	chrIV	+	TATA-less	TAF1-enriched	1456	1403317	1403264	-53	YDR472W	878	0.003259261	0.013310505	1	0.276262714	0.789428598	0.59583086	0.789428598	0.730272152	0.012931718	2	TRUE
1334	1343	YDR473C	chrIV	-	TATA-less	TAF1-enriched	373	1405869	1405908	-39	YDR473C	51.4	0.164201925	NA	NA	NA	NA	NA	NA	NA	NA	NA	NA
1335	1344	ST0764	chrIV	+	TATA-less	TAF1-enriched	87	1406125	1406086	-39	ST0764	77	0.003873274	0.064788771	0.275773361	0.327914702	0.344577552	0.368604	0.855269482	0.024593514	0.678476076	1	TRUE
1336	1345	YDR475C	chrIV	-	TATA-less	TAF1-depleted	98	1410061	1410359	-298	YDR475C	42.2	0.229795608	NA	NA	NA	NA	NA	NA	NA	NA	NA	NA
1337	1346	YDR476C	chrIV	-	TATA-containing	TAF1-enriched	1681	1411121	1411151	-30	YDR476C	1118.9	0.000337699	0.096009697	0.108717029	0.28499483	0.556226419	0.016063121	0.556226419	0.447438041	0.062205994	1	TRUE
1338	1347	YDR477W	chrIV	+	TATA-less	TAF1-enriched	488	1412124	1412092	-32	YDR477W	1531.5	0.003775531	0.45384566	0.040202603	0.509269916	0.129479247	0.394200786	0.040240326	0.447306427	0.509269916	2	TRUE
1339	1348	YDR478W	chrIV	+	TATA-less	TAF1-enriched	86	1414605	1414538	-67	YDR478W	300.4	0.007095191	0.143046006	0.277990008	0.714051764	0.044393323	0.636180309	0.044393323	0.636180309	0.714051764	2	TRUE
1340	1349	YDR479C	chrIV	-	TATA-less	TAF1-enriched	270	1416883	1416922	-39	YDR479C	456.7	0.006236547	0.00284428	0.455654613	1	1	0.291410101	1	1	1	1	TRUE
1341	1350	YDR480W	chrIV	+	TATA-less	TAF1-enriched	207	1417359	1417354	-5	YDR480W	108.8	0.06151615	NA	NA	NA	NA	NA	NA	NA	NA	NA	NA
1342	1351	YDR481C	chrIV	-	TATA-containing	TAF1-depleted	1166	1420282	1420305	-23	YDR481C	1432.7	0.000690064	0.272763658	0.047038535	0.074121875	0.745406713	0.004976334	0.720962996	0.833984437	0.029592475	3	TRUE
1343	1352	YDR482C	chrIV	-	TATA-less	TAF1-enriched	595	1420837	1420871	-34	YDR482C	406.1	0.00186731	0.010604478	0.137348478	0.029797513	0.244547984	0.138523673	0.47895659	0.203658889	0.915748672	2	TRUE
1344	1353	YDR483W	chrIV	+	TATA-less	TAF1-enriched	13178	1421178	1421131	-47	YDR483W	2298.6	0.000214589	0.004147181	1	0.026335327	1	0.00155486	1	1	0.358027567	3	TRUE
1345	1354	YDR484W	chrIV	+	TATA-less	TAF1-enriched	273	1422778	1422738	-40	YDR484W	794.5	0.000933074	0.01084872	0.414951565	0.503008151	0.823337269	0.008241266	0.823337269	0.773177882	0.823337269	2	TRUE
1346	1355	CUT098	chrIV	+	TATA-less	TAF1-depleted	0	1427424	1427346	-78	CUT098	41.5	0.000913714	0.014770285	1	0.017313992	0.841601878	0.000518032	0.841601878	0.139507179	0.841601878	3	TRUE
1347	1356	YDR486C	chrIV	-	TATA-less	TAF1-enriched	600	1428093	1428129	-36	YDR486C	6268.3	0.000156277	0.003896568	1	1	1	0.00062607	1	1	1	2	TRUE
1348	1357	YDR487C	chrIV	-	TATA-containing	TAF1-depleted	1018	1428981	1429050	-69	YDR487C	6479.7	0.00062703	0.20047505	0.244497958	0.216809037	0.140454371	0.019538116	0.063372273	0.253523108	0.359492202	1	TRUE
1349	1358	YDR488C	chrIV	-	TATA-less	TAF1-enriched	107	1430745	1430782	-37	YDR488C	484.1	0.001031298	0.050528374	0.487761114	0.069696573	0.500485552	0.006964494	0.500485552	0.384422568	0.39728714	1	TRUE
1350	1359	YDR489W	chrIV	+	TATA-less	TAF1-enriched	486	1431049	1431014	-35	YDR489W	488.3	0.000429747	0.014029226	1	0.023039188	0.675806531	0.003344606	0.675806531	0.589277083	0.07778578	3	TRUE
1351	1360	YDR490C	chrIV	-	TATA-less	TAF1-enriched	97	1434290	1434341	-51	YDR490C	435.2	0.000323574	0.020485053	0.030171088	1	1	0.491982789	1	1	1	2	TRUE
1352	1361	YDR492W	chrIV	+	TATA-containing	TAF1-depleted	547	1434765	1434723	-42	YDR492W	600	0.093628728	NA	NA	NA	NA	NA	NA	NA	NA	NA	NA
1353	1362	YDR493W	chrIV	+	TATA-less	TAF1-enriched	363	NA	1436135	NA	YDR493W	2693.5	0.00050362	0.093310573	0.125774895	0.272830831	0.087385388	0.317653972	0.042166446	0.1393764	0.317402051	1	TRUE
1354	1363	CUT536	chrIV	-	TATA-less	TAF1-enriched	4	1436649	1436681	-32	CUT536	41.7	0.003454884	0.09200501	0.524895767	0.084736055	0.005056336	0.026049521	0.565551988	0.735971538	0.565551988	2	TRUE
1355	1364	YDR494W	chrIV	+	TATA-less	TAF1-enriched	825	1436922	1436897	-25	YDR494W	4354.5	0.000648626	0.205817623	0.017412871	0.61642144	0.21659849	0.310985204	0.713359774	0.077121857	0.61642144	1	TRUE
1356	1365	YDR495C	chrIV	-	TATA-less	TAF1-enriched	14	1441161	1441213	-52	YDR495C	332.8	0.00065804	0.030254404	0.172144538	0.47944998	0.643128041	0.060323725	0.341581417	0.825580436	0.150218326	1	TRUE
1357	1366	YDR496C	chrIV	-	TATA-less	TAF1-enriched	269	1443381	1443431	-50	YDR496C	2060.6	0.000353605	0.051571246	0.132513215	0.627918493	0.286311069	0.144304593	0.09938562	0.226405349	0.09938562	0	FALSE
1358	1367	YDR497C	chrIV	-	TATA-containing	TAF1-depleted	325	1445368	1445524	-156	YDR497C	4182.9	NA	NA	NA	NA	NA	NA	NA	NA	NA	NA	NA
1359	1368	YDR498C	chrIV	-	TATA-less	TAF1-enriched	190	1446982	1447037	-55	YDR498C	729	0.007890047	1	0.007448876	0.235582796	0.235582796	0.125707973	0.235582796	0.350464781	0.235582796	1	TRUE
1360	1369	YDR499W	chrIV	+	TATA-less	TAF1-enriched	172	1447846	1447837	-9	YDR499W	177.1	0.002653243	0.216573022	0.079796623	0.230364065	0.471738707	0.020196894	0.471738707	0.756797227	0.230364065	1	TRUE
1361	1370	YDR500C	chrIV	-	TATA-less	TAF1-enriched	517	1450787	1450863	-76	YDR500C	2946.7	0.00092794	0.189560777	0.121044793	0.05397841	0.202739221	0.038818577	0.452527964	0.221406466	0.05397841	1	TRUE
1362	1371	YDR502C	chrIV	-	TATA-less	TAF1-depleted	2930	1454412	1454512	-100	YDR502C	633	0.000863209	1	0.018822844	1	0.031008248	0.574244276	0.010075609	0.01272003	1	4	TRUE
1363	1372	YDR503C	chrIV	-	TATA-less	TAF1-enriched	146	1455889	1455931	-42	YDR503C	631	0.000520701	0.150765757	0.033613574	0.441157013	0.569146811	0.046728426	1	0.341531818	0.123442961	2	TRUE
1364	1373	ST0779	chrIV	+	TATA-less	TAF1-enriched	9	1456297	1456179	-118	ST0779	114.2	0.00058562	0.039897304	0.344097669	0.123949155	0.390743879	0.630630819	0.158877501	0.044751705	0.116230409	2	TRUE
1365	1374	ST0780	chrIV	+	TATA-less	TAF1-enriched	40	1459811	1459752	-59	ST0780	282.3	0.00885738	0.001473611	0.312464694	0.351179945	0.351179945	0.228744981	0.704637173	0.228744981	0.351179945	1	TRUE
1366	1375	YDR506C	chrIV	-	TATA-less	TAF1-enriched	21	1461567	1461572	-5	YDR506C	111.3	0.00370725	0.033730652	0.465465709	0.252293953	0.043693391	0.760390122	0.03664424	0.796368093	0.317589102	3	TRUE
1367	1376	YDR507C	chrIV	-	TATA-less	TAF1-depleted	3928	1465898	1465905	-7	YDR507C	876.5	0.000369895	0.08810853	0.058098183	1	1	0.093949807	1	0.049386444	0.387079796	1	TRUE
1368	1377	YDR508C	chrIV	-	TATA-containing	TAF1-depleted	652	1468370	1468488	-118	YDR508C	492.4	0.000164247	0.026038945	0.118862509	0.02494201	1	0.021592685	1	1	1	3	TRUE
1369	1378	YDR510W	chrIV	+	TATA-less	TAF1-enriched	2590	1469354	1469323	-31	YDR510W	8626.3	0.000147379	0.049776658	0.086044332	0.099881656	1	0.072002946	0.179205205	1	0.179205205	1	TRUE
1370	1379	orphan	chrIV	-	TATA-less	TAF1-enriched	32	1469653	1469695	-42	orphan	2.6	0.270754904	NA	NA	NA	NA	NA	NA	NA	NA	NA	NA
1371	1380	YDR511W	chrIV	+	TATA-less	TAF1-enriched	7160	1470035	1470000	-35	YDR511W	351.9	0.003791685	0.037911401	0.450344693	0.044757965	0.635687493	0.009571829	0.883583692	0.850063456	0.281625524	3	TRUE
1372	1381	YDR512C	chrIV	-	TATA-less	TAF1-depleted	239	1470765	1470773	-8	YDR512C	656.8	0.001246253	0.022592349	0.301268349	0.377457442	0.129673258	0.254528132	0.264538626	0.237040402	0.677178509	1	TRUE
1373	1382	YDR513W	chrIV	+	TATA-containing	TAF1-depleted	5593	1471198	1470995	-203	YDR513W	6524.4	0.000139205	1	0.002185327	1	1	1	0.002150894	1	1	2	TRUE
1374	1383	YDR516C	chrIV	-	TATA-containing	TAF1-depleted	225	1476441	1476528	-87	YDR516C	3477.8	0.000192405	0.008771166	1	0.024337451	1	0.001074009	1	1	0.024337451	4	TRUE
1375	1384	YDR517W	chrIV	+	TATA-less	TAF1-enriched	1093	1477179	1477166	-13	YDR517W	1497.4	0.008080123	0.586770193	0.024668217	0.538392566	0.538392566	0.427033261	0.538392566	1	0.538392566	1	TRUE
1376	1385	YDR518W	chrIV	+	TATA-less	TAF1-enriched	1430	1478640	1478583	-57	YDR518W	490.5	0.001392657	0.002185327	1	1	1	0.047619286	1	1	1	2	TRUE
1377	1386	YDR519W	chrIV	+	TATA-less	TAF1-enriched	308	1480425	1480380	-45	YDR519W	1696.3	0.000157893	0.022958508	1	0.021821197	1	6.84E-05	1	1	1	3	TRUE
1378	1387	YDR520C	chrIV	-	TATA-less	TAF1-enriched	301	1483468	1483489	-21	YDR520C	43.2	0.00115807	0.049303521	0.225476364	0.27796794	0.178956463	0.075589125	0.178956463	0.414917104	0.549091934	1	TRUE
1379	1388	ST0790	chrIV	+	TATA-less	TAF1-enriched	85	1483752	1483721	-31	ST0790	62.5	0.00211214	0.009802407	1	0.436546302	0.524400427	0.004644566	0.524400427	0.749274886	0.178985667	2	TRUE
1380	1389	YDR524C	chrIV	-	TATA-less	TAF1-enriched	122	1489018	1489057	-39	YDR524C	676.2	0.005687352	0.305577441	0.124337628	0.552393872	0.372786918	0.114847678	0.973666755	0.166051352	0.221948455	0	FALSE
1381	1390	YDR524C-B	chrIV	-	TATA-containing	TAF1-depleted	349786	1489746	1489843	-97	YDR524C-B	74438.9	0.000145985	1	0.005962079	1	1	1	1	0.000245733	1	2	TRUE
1382	1391	YDR525W-A	chrIV	+	TATA-less	TAF1-enriched	6217	1490606	1490563	-43	YDR525W-A	3090.6	0.061568485	NA	NA	NA	NA	NA	NA	NA	NA	NA	NA
1383	1392	orphan	chrIV	-	TATA-less	TAF1-depleted	72	1493096	1493114	-18	orphan	644	0.000591151	0.016113683	0.002048488	0.190275706	0.066215134	0.01771552	0.424268159	0.97454882	0.424268159	3	TRUE
1384	1393	ST4473	chrIV	-	TATA-less	TAF1-enriched	25	1493984	1493987	-3	ST4473	33.6	0.001675726	0.057131682	0.250049513	0.01834967	0.497474707	0.020619718	0.746634486	1	0.164758272	2	TRUE
1385	1394	YDR528W	chrIV	+	TATA-containing	TAF1-depleted	100	1494457	1494315	-142	YDR528W	165.8	0.003439408	1	0.002387976	0.752972017	0.752972017	0.684518084	0.752972017	0.163605363	0.752972017	1	TRUE
1386	1395	YDR529C	chrIV	-	TATA-less	TAF1-enriched	1146	1496539	1496573	-34	YDR529C	3493.8	0.000260029	0.009159633	0.473583652	0.026935732	1	0.007038492	1	1	0.108315891	3	TRUE
1387	1396	CUT101	chrIV	+	TATA-less	TAF1-enriched	167	1496856	1496839	-17	CUT101	11.9	0.089496304	NA	NA	NA	NA	NA	NA	NA	NA	NA	NA
1388	1397	YDR530C	chrIV	-	TATA-less	TAF1-enriched	68	1497732	1497883	-151	YDR530C	994	0.001345143	0.069869041	0.00304866	1	1	1	1	0.456707647	1	1	TRUE
1389	1398	YDR531W	chrIV	+	TATA-less	TAF1-enriched	73	1498221	1498182	-39	YDR531W	502.1	0.223733072	NA	NA	NA	NA	NA	NA	NA	NA	NA	NA
1390	1399	YDR532C	chrIV	-	TATA-less	TAF1-depleted	26	1500546	1500588	-42	YDR532C	143.5	0.001832035	0.027874454	0.432233989	0.986271721	0.459368037	0.031182696	0.986271721	0.563562956	0.040599537	3	TRUE
1391	1400	YDR533C	chrIV	-	TATA-containing	TAF1-depleted	2053	1502040	1502206	-166	YDR533C	231	0.005899708	0.237850806	0.170005294	0.097579445	0.352697251	0.0031513	0.523189291	0.484539038	0.059702415	1	TRUE
1392	1401	YDR534C	chrIV	-	TATA-less	TAF1-enriched	16	1504845	1504922	-77	YDR534C	2.3	0.035706841	0.209087498	0.959928633	0.867825574	0.279962853	0.835569749	0.279369355	0.169097756	0.255450166	0	FALSE
1393	1402	ST4481	chrIV	-	TATA-containing	TAF1-enriched	27	1509739	1509791	-52	ST4481	62.4	0.047137466	0.378539368	0.043457535	0.143306019	0.334725741	0.132838881	0.689774654	0.667611234	0.594577421	1	TRUE
1394	1403	YDR539W	chrIV	+	TATA-less	TAF1-depleted	585	1512235	1512054	-181	YDR539W	475.8	0.001020501	0.02866388	0.459523204	0.224236555	0.417810027	0.022130514	0.417810027	0.49933256	0.105135016	2	TRUE
1395	1404	orphan	chrIV	-	TATA-less	TAF1-enriched	0	1518263	1518289	-26	orphan	0.4	0.598332188	NA	NA	NA	NA	NA	NA	NA	NA	NA	NA
1396	1405	ST0803	chrIV	+	TATA-less	TAF1-enriched	21	1521349	1521221	-128	ST0803	112.3	0.032965796	0.211729106	0.564357855	0.840155064	0.404794756	0.26237406	0.12487304	0.047567982	0.257951297	1	TRUE
1397	1406	ST4485	chrV	-	TATA-less	TAF1-enriched	327	NA	9775	NA	ST4485	113.3	0.018977418	0.075350755	1	0.067804754	0.310290657	0.002458575	0.133193659	0.924863033	0.928854711	1	TRUE
1398	1407	CUT103	chrV	+	TATA-less	TAF1-enriched	208	10128	9998	-130	CUT103	37.9	0.001988844	0.03613829	1	0.011751597	0.596799274	0.012009742	0.033586457	0.807941078	0.822635674	4	TRUE
1399	1408	YEL072W	chrV	+	TATA-less	TAF1-enriched	239	13675	13652	-23	YEL072W	121.1	0.035636748	0.243678499	0.406277341	0.53455817	0.523110683	0.003204365	0.786261552	0.812541334	0.655513688	1	TRUE
1400	1409	ST4490	chrV	-	TATA-less	TAF1-enriched	257	15736	15878	-142	ST4490	445.8	0.001214422	0.109086796	0.51775845	0.005338822	0.118286536	0.000322513	0.663718332	0.802997997	0.059555603	2	TRUE
1401	1410	YEL071W	chrV	+	TATA-containing	TAF1-depleted	5325	16329	16326	-3	YEL071W	1956	0.018625522	0.702177288	0.045483281	0.036224539	0.948617479	0.01676265	0.723011719	0.802906964	0.846701278	3	TRUE
1402	1411	YEL068C	chrV	-	TATA-less	TAF1-enriched	94	25968	25967	1	YEL068C	1722.2	0.001972597	0.002967262	1	1	1	0.035650489	1	1	1	2	TRUE
1403	1412	orphan	chrV	-	TATA-less	TAF1-enriched	13	27207	27222	-15	orphan	6.3	0.175460286	NA	NA	NA	NA	NA	NA	NA	NA	NA	NA
1404	1413	YEL065W	chrV	+	TATA-containing	TAF1-depleted	2151	27731	27627	-104	YEL065W	456.9	0.096172265	NA	NA	NA	NA	NA	NA	NA	NA	NA	NA
1405	1414	YEL063C	chrV	-	TATA-less	TAF1-depleted	102	33658	33697	-39	YEL063C	992.2	0.014609733	0.505533383	0.091658094	0.236738233	0.046198465	0.414471767	0.733580507	0.249798402	0.638333588	1	TRUE
1406	1415	CUT104	chrV	+	TATA-less	TAF1-enriched	0	34061	34019	-42	CUT104	4.1	0.018765509	0.294174647	0.464701908	0.498474746	0.207457345	0.002042908	0.146534032	0.850692161	0.599697046	1	TRUE
1407	1416	YEL062W	chrV	+	TATA-less	TAF1-enriched	786	34430	34394	-36	YEL062W	90.8	0.240295623	NA	NA	NA	NA	NA	NA	NA	NA	NA	NA
1408	1417	YEL061C	chrV	-	TATA-less	TAF1-enriched	41	NA	39630	NA	YEL061C	928.6	0.001158959	0.084790539	0.079644126	0.078400572	0.387576384	0.094293959	0.700971548	0.50860899	0.773341394	0	FALSE
1409	1418	YEL060C	chrV	-	TATA-containing	TAF1-depleted	6096	41962	42008	-46	YEL060C	5846.8	NA	NA	NA	NA	NA	NA	NA	NA	NA	NA	NA
1410	1419	YEL058W	chrV	+	TATA-less	TAF1-enriched	785	43276	43221	-55	YEL058W	2031.8	0.000133552	0.076632745	0.020593416	1	0.052433321	1	0.052433321	1	1	1	TRUE
1411	1420	CUT105	chrV	+	TATA-less	TAF1-enriched	11	45229	45177	-52	CUT105	12.6	0.462622666	NA	NA	NA	NA	NA	NA	NA	NA	NA	NA
1412	1421	YEL056W	chrV	+	TATA-less	TAF1-enriched	788	47150	47124	-26	YEL056W	276.8	0.001071526	0.067665857	0.175702982	1	0.058172543	0.196342042	0.058172543	1	0.452887697	0	FALSE
1413	1423	YEL054C	chrV	-	TATA-less	TAF1-enriched	2501	53199	53245	-46	YEL054C	47235.8	0.000141538	0.000426605	1	1	1	1	1	1	1	1	TRUE
1414	1424	YEL053C	chrV	-	TATA-less	TAF1-enriched	10	56152	56164	-12	YEL053C	409.2	0.010496399	0.083306183	0.611732851	0.065787343	0.210893794	0.005149489	0.993475612	0.575816361	0.210893794	1	TRUE
1415	1425	YEL052W	chrV	+	TATA-less	TAF1-enriched	871	56566	56536	-30	YEL052W	1394.2	0.00109895	0.079566188	0.14318858	1	1	0.002159924	1	1	1	1	TRUE
1416	1426	YEL051W	chrV	+	TATA-less	TAF1-enriched	881	58382	58331	-51	YEL051W	5793.8	0.000133552	1	0.007321676	1	1	1	1	0.000149015	1	2	TRUE
1417	1427	CUT545	chrV	-	TATA-less	TAF1-depleted	42	59067	59208	-141	CUT545	36	0.083616521	NA	NA	NA	NA	NA	NA	NA	NA	NA	NA
1418	1428	YEL050C	chrV	-	TATA-less	TAF1-enriched	132	60872	60902	-30	YEL050C	471	0.000542622	0.106801739	0.110056135	0.236738233	0.200395166	0.034570033	0.758119857	0.154777986	0.465783382	1	TRUE
1419	1429	orphan	chrV	+	TATA-less	TAF1-enriched	1235	NA	61223	NA	orphan	3603.5	0.000381686	0.334587998	0.0871681	0.168414517	0.037343423	0.075386195	0.01937509	0.062770983	0.262257512	2	TRUE
1420	1430	YEL048C	chrV	-	TATA-less	TAF1-enriched	199	65140	65188	-48	YEL048C	304.4	0.000326182	0.043439583	0.264754715	0.069371909	0.574588955	0.019056035	0.275892031	0.468671119	0.338303852	2	TRUE
1421	1431	YEL047C	chrV	-	TATA-containing	TAF1-enriched	1263	66800	66819	-19	YEL047C	1074	0.000786579	0.001862846	0.479500122	1	1	1	1	1	1	1	TRUE
1422	1432	orphan	chrV	+	TATA-containing	TAF1-enriched	0	67175	67139	-36	orphan	17.8	0.504721671	NA	NA	NA	NA	NA	NA	NA	NA	NA	NA
1423	1433	orphan	chrV	-	TATA-less	TAF1-enriched	73	67345	67431	-86	orphan	143.2	0.346848524	NA	NA	NA	NA	NA	NA	NA	NA	NA	NA
1424	1434	YEL046C	chrV	-	TATA-containing	TAF1-depleted	796746	68885	68894	-9	YEL046C	11993.8	0.000231339	0.043991027	0.186233693	0.023937397	0.876711833	0.017258803	0.876711833	0.841258921	0.065120662	3	TRUE
1425	1435	YEL044W	chrV	+	TATA-less	TAF1-enriched	331	69810	69737	-73	YEL044W	1543.2	0.016789476	0.290514482	0.120313189	0.27287057	0.27287057	0.156908974	0.236336293	0.610334567	0.27287057	0	FALSE
1426	1436	YEL043W	chrV	+	TATA-less	TAF1-depleted	99	70494	70337	-157	YEL043W	481	0.000474182	0.04955627	0.174336707	0.210015484	0.395791907	0.034053362	0.395791907	0.272964273	0.386854871	2	TRUE
1427	1437	YEL042W	chrV	+	TATA-less	TAF1-depleted	1280	73679	73644	-35	YEL042W	2196.1	0.000180487	0.04678361	0.129077154	0.172774533	0.594700942	0.012028186	0.206378693	1	0.244493265	2	TRUE
1428	1438	orphan	chrV	-	TATA-less	TAF1-enriched	0	77581	77688	-107	orphan	1.7	0.907831103	NA	NA	NA	NA	NA	NA	NA	NA	NA	NA
1429	1439	YEL040W	chrV	+	TATA-containing	TAF1-depleted	124	78144	78041	-103	YEL040W	8342.9	0.000190459	0.010185784	1	0.016311183	1	0.000759119	1	1	0.039006983	4	TRUE
1430	1440	YEL038W	chrV	+	TATA-less	TAF1-enriched	342	80467	80443	-24	YEL038W	2685.7	0.000791112	0.066470689	0.066470689	0.044388806	0.450909134	0.194387689	1	0.594042428	1	1	TRUE
1431	1441	YEL037C	chrV	-	TATA-less	TAF1-enriched	3301	82728	82762	-34	YEL037C	449.6	0.0002354	0.199190848	0.044080309	0.085788666	0.383749707	0.077719929	0.139323064	0.227433553	0.375084314	1	TRUE
1432	1442	YEL036C	chrV	-	TATA-less	TAF1-enriched	5215	84635	84697	-62	YEL036C	509.4	0.021518062	1	0.007043985	1	1	1	1	0.240954669	1	1	TRUE
1433	1443	YEL034W	chrV	+	TATA-less	TAF1-enriched	1587866	85694	85623	-71	YEL034W	60084.3	0.001853227	0.507411142	0.07198232	0.13033138	0.574187008	0.0508182	0.236292953	0.126281993	0.13033138	0	FALSE
1434	1444	tS(AGA)E	chrV	+	TATA-less	-	27	86698	86594	-104	tS(AGA)E	21.1	0.058761394	NA	NA	NA	NA	NA	NA	NA	NA	NA	NA
1435	1445	YEL032W	chrV	+	TATA-less	TAF1-enriched	3759	86910	86853	-57	YEL032W	1235.7	0.000133552	1	0.003004262	1	0.016615063	1	0.006195019	1	1	3	TRUE
1436	1446	YEL031W	chrV	+	TATA-less	TAF1-enriched	727	90262	90227	-35	YEL031W	3263	0.000250099	0.163411856	0.085456031	0.33385702	0.191060839	0.038892027	0.191060839	0.12846954	0.33385702	1	TRUE
1437	1447	YEL029C	chrV	-	TATA-less	TAF1-enriched	3077	97835	97861	-26	YEL029C	244.9	0.007052401	0.021518371	1	0.004003222	1	0.071919253	1	1	1	2	TRUE
1438	1448	ANT153	chrV	-	TATA-less	TAF1-enriched	48	99432	99457	-25	ANT153	127.2	0.061968615	NA	NA	NA	NA	NA	NA	NA	NA	NA	NA
1439	1449	tM(CAU)E	chrV	+	TATA-less	-	1154	100157	100123	-34	tM(CAU)E	35.5	0.755812637	NA	NA	NA	NA	NA	NA	NA	NA	NA	NA
1440	1450	orphan	chrV	-	TATA-less	TAF1-enriched	0	100157	100427	-270	orphan	47.4	0.010217455	0.017408966	0.605193389	0.120364967	0.746246642	0.132601561	0.746246642	0.601534573	0.244046259	1	TRUE
1441	1451	YEL027W	chrV	+	TATA-less	TAF1-enriched	13159	100759	100706	-53	YEL027W	47693.2	0.000580486	0.760715159	0.017681546	0.580202946	0.040800783	0.4752062	0.040800783	0.017846903	0.580202946	4	TRUE
1442	1452	YEL026W	chrV	+	TATA-less	TAF1-depleted	45256	101859	101853	-6	YEL026W	39784.6	0.004378469	0.002629267	1	1	1	1	1	1	1	1	TRUE
1443	1454	YEL025C	chrV	-	TATA-less	TAF1-enriched	86	106113	106152	-39	YEL025C	256.3	0.001878946	0.097655911	0.177144777	0.09626989	0.534201829	0.031777505	0.534201829	0.948120964	0.09626989	1	TRUE
1444	1455	YEL024W	chrV	+	TATA-less	TAF1-enriched	812	107222	107184	-38	YEL024W	1666.1	0.000481934	0.01157075	0.411431877	0.193713465	0.526620374	0.031467181	0.526620374	0.413686494	0.193713465	2	TRUE
1445	1456	YEL022W	chrV	+	TATA-less	TAF1-enriched	488	111382	111343	-39	YEL022W	1570.8	0.000901389	0.003113057	1	0.249385327	0.187243504	0.115666026	0.187243504	0.188639257	0.725917636	1	TRUE
1446	1457	YEL020W-A	chrV	+	TATA-containing	TAF1-enriched	1005	117210	117160	-50	YEL020W-A	5440.9	0.000467916	1	0.022272448	0.063250139	0.156900366	0.130892785	0.156900366	0.115493912	0.12598486	1	TRUE
1447	1458	YEL020C-B	chrV	-	TATA-less	TAF1-enriched	1983	117404	117728	-324	YEL020C-B	1069.9	0.70652197	NA	NA	NA	NA	NA	NA	NA	NA	NA	NA
1448	1459	ST0838	chrV	+	TATA-less	TAF1-enriched	64	118091	117951	-140	ST0838	7.9	0.654127064	NA	NA	NA	NA	NA	NA	NA	NA	NA	NA
1449	1460	YEL018W	chrV	+	TATA-less	TAF1-enriched	158	121503	121451	-52	YEL018W	1212.1	0.001311279	0.0513497	0.237627831	0.734170201	0.734170201	0.086924451	0.225206971	0.057467884	0.528266075	0	FALSE
1450	1461	YEL017C-A	chrV	-	TATA-less	TAF1-depleted	7310	122828	122961	-133	YEL017C-A	18082	0.002956979	0.589467605	0.102298289	0.167815186	0.599283148	0.015668446	0.293321367	0.815624961	0.018057231	2	TRUE
1451	1462	YEL017W	chrV	+	TATA-less	TAF1-enriched	1147	123698	123628	-70	YEL017W	645.4	0.004788495	0.611038404	0.006479753	0.481052285	0.111953969	0.582305422	0.755542321	0.656863871	0.219081982	1	TRUE
1452	1463	YEL015W	chrV	+	TATA-less	TAF1-enriched	269	126635	126626	-9	YEL015W	1937.4	0.000356319	0.004421608	1	0.189224923	1	0.001233875	1	1	1	2	TRUE
1453	1464	YEL013W	chrV	+	TATA-less	TAF1-enriched	1318	128629	128588	-41	YEL013W	1112	0.000152189	0.068934282	0.115705004	0.013245451	1	0.005422465	1	1	1	2	TRUE
1454	1465	tQ(UUG)E2	chrV	+	TATA-less	-	52	131251	131228	-23	tQ(UUG)E2	4.7	0.252119403	NA	NA	NA	NA	NA	NA	NA	NA	NA	NA
1455	1466	orphan	chrV	-	TATA-less	TAF1-enriched	69	131423	131432	-9	orphan	55.4	0.002744793	0.143930084	0.143930084	0.076344952	0.915443832	0.003995879	0.915443832	0.890974829	0.249491267	1	TRUE
1456	1467	YEL012W	chrV	+	TATA-less	TAF1-enriched	194	NA	131636	NA	YEL012W	348.1	0.000747048	0.034915969	0.309026763	0.127496132	0.544287266	0.049120926	0.163635137	0.374235994	0.403284559	2	TRUE
1457	1468	ANT139	chrV	-	TATA-less	TAF1-enriched	1469	135060	135395	-335	ANT139	34.8	0.06286664	NA	NA	NA	NA	NA	NA	NA	NA	NA	NA
1458	1469	tK(CUU)E1	chrV	+	TATA-less	-	0	NA	135505	NA	tK(CUU)E1	1.5	0.880719204	NA	NA	NA	NA	NA	NA	NA	NA	NA	NA
1459	1470	tR(UCU)E	chrV	-	TATA-less	-	0	138508	138613	-105	tR(UCU)E	1.6	0.159111613	NA	NA	NA	NA	NA	NA	NA	NA	NA	NA
1460	1471	YEL008W	chrV	+	TATA-containing	TAF1-depleted	7	NA	140550	NA	YEL008W	44.7	0.00395272	0.051457137	0.60771806	0.085420781	0.003604149	0.072884048	0.085420781	0.830922495	0.085420781	1	TRUE
1461	1472	YEL008C-A	chrV	-	TATA-less	TAF1-enriched	3604	140708	140840	-132	YEL008C-A	174.3	0.162476779	NA	NA	NA	NA	NA	NA	NA	NA	NA	NA
1462	1473	YEL007W	chrV	+	TATA-less	TAF1-enriched	32631	NA	141640	NA	YEL007W	1618.1	0.001444437	0.002899686	0.743214538	0.331761105	0.148844505	0.210204262	0.148844505	0.078676526	0.750419057	1	TRUE
1463	1474	YEL006W	chrV	+	TATA-containing	TAF1-depleted	400	144312	144270	-42	YEL006W	561.6	0.000813479	0.158011959	0.416038339	0.08041898	0.069446954	0.208135705	0.02035133	0.572584986	0.736717122	1	TRUE
1464	1475	YEL003W	chrV	+	TATA-less	TAF1-enriched	122	148225	148148	-77	YEL003W	1405.8	NA	NA	NA	NA	NA	NA	NA	NA	NA	NA	NA
1465	1477	YEL002C	chrV	-	TATA-less	TAF1-enriched	1159	150010	150064	-54	YEL002C	7154.2	0.000814678	0.046637982	0.441846607	0.027318222	0.833183126	0.004383651	0.833183126	0.785690935	0.31820189	3	TRUE
1466	1478	CUT106	chrV	+	TATA-less	TAF1-enriched	28	150318	150270	-48	CUT106	26.9	0.142366367	NA	NA	NA	NA	NA	NA	NA	NA	NA	NA
1467	1479	YEL001C	chrV	-	TATA-less	TAF1-enriched	2353	150942	151013	-71	YEL001C	10137.7	0.000236802	0.39974478	0.01898699	0.075238232	0.644637445	0.021636394	0.210607961	0.225457814	1	2	TRUE
1468	1481	ST4529	chrV	-	TATA-less	TAF1-enriched	32	151845	151851	-6	ST4529	64.7	0.000340597	0.004319468	1	0.008232032	0.392003681	0.004252637	1	1	0.314965693	3	TRUE
1469	1482	CUT547	chrV	-	TATA-less	TAF1-enriched	6	152662	152738	-76	CUT547	4.5	0.308364331	NA	NA	NA	NA	NA	NA	NA	NA	NA	NA
1470	1483	YER001W	chrV	+	TATA-containing	TAF1-depleted	328	153466	153474	8	YER001W	540	0.000297558	0.102868496	0.051065654	1	0.107046972	0.070420108	0.092631038	1	1	0	FALSE
1471	1484	ST4532	chrV	-	TATA-containing	TAF1-enriched	0	NA	156467	NA	ST4532	112.8	0.000491572	0.588174082	0.025148815	0.047715709	0.175525053	0.0338881	0.286380481	0.462504551	0.265197678	3	TRUE
1472	1485	YER002W	chrV	+	TATA-less	TAF1-enriched	490	156805	156754	-51	YER002W	639.2	0.000143789	0.010962276	1	0.015947254	1	0.000321147	1	1	0.07067028	3	TRUE
1473	1486	YER003C	chrV	-	TATA-less	TAF1-enriched	1123	159114	159152	-38	YER003C	5175.6	0.000640722	0.143452143	0.091161684	0.165166666	0.62012052	0.006748782	0.62012052	0.831087893	0.098480509	1	TRUE
1474	1487	YER004W	chrV	+	TATA-less	TAF1-enriched	8959	159592	159572	-20	YER004W	2914.7	0.000585731	0.009921768	1	0.004733179	1	0.006238807	1	1	1	3	TRUE
1475	1488	YER005W	chrV	+	TATA-less	TAF1-depleted	963	160548	160506	-42	YER005W	106.7	0.001960691	0.130781656	0.113107844	0.687861452	0.359661463	0.184247003	0.079830753	0.114852513	0.618356423	0	FALSE
1476	1489	ST4534	chrV	-	TATA-less	TAF1-enriched	465	162413	162446	-33	ST4534	41.8	0.008396891	0.301471375	0.353970235	0.027415502	0.600043211	0.004408442	0.86125293	0.179242467	0.400568716	2	TRUE
1477	1490	YER006W	chrV	+	TATA-less	TAF1-enriched	4224	162736	162696	-40	YER006W	3788.9	0.000566875	0.717803654	0.002598483	0.068342824	0.674023648	0.018615281	0.836640722	0.889908173	0.836640722	2	TRUE
1478	1491	YER007C-A	chrV	-	TATA-less	TAF1-enriched	2743	166855	166910	-55	YER007C-A	1311.8	0.000841013	0.034852354	0.081063961	0.362808903	1	0.060143356	1	0.55692225	1	1	TRUE
1479	1492	orphan	chrV	-	TATA-containing	TAF1-depleted	47382	167561	167586	-25	orphan	45213.2	0.00108416	1	1	1	0.038867104	1	6.23E-06	1	1	2	TRUE
1480	1493	orphan	chrV	+	TATA-less	TAF1-enriched	15	167868	167847	-21	orphan	10.8	0.071214648	NA	NA	NA	NA	NA	NA	NA	NA	NA	NA
1481	1494	YER008C	chrV	-	TATA-less	TAF1-enriched	126	171832	171875	-43	YER008C	128.8	0.014770797	0.772260302	0.022530264	0.71610647	0.621154682	0.837845152	0.032730004	0.638717676	0.032730004	3	TRUE
1482	1495	YER010C	chrV	-	TATA-less	TAF1-enriched	581	173147	173306	-159	YER010C	1365.7	0.191553276	NA	NA	NA	NA	NA	NA	NA	NA	NA	NA
1483	1496	YER011W	chrV	+	TATA-containing	TAF1-depleted	368	175326	175194	-132	YER011W	381	0.00447673	0.002662315	1	1	1	1	1	1	1	1	TRUE
1484	1497	tE(UUC)E1	chrV	+	TATA-less	-	743	177119	177087	-32	tE(UUC)E1	70.1	0.050061305	NA	NA	NA	NA	NA	NA	NA	NA	NA	NA
1485	1498	ST4539	chrV	-	TATA-less	TAF1-enriched	123	177542	177580	-38	ST4539	371.8	0.007588286	0.119600529	0.56955717	0.059383179	0.097757191	0.319856265	0.908635218	0.18240296	0.097757191	0	FALSE
1486	1499	YER012W	chrV	+	TATA-less	TAF1-enriched	358	NA	177823	NA	YER012W	5527.3	0.000388623	0.070417205	0.103462172	0.1704332	0.655649848	0.01260798	0.655649848	0.564825064	0.191978025	1	TRUE
1487	1500	CUT550	chrV	-	TATA-less	TAF1-enriched	130	178394	178485	-91	CUT550	111.4	0.000688805	0.179389366	0.749214253	0.007781141	1	0.001552819	0.107210114	0.651204451	0.068610988	2	TRUE
1488	1501	YER013W	chrV	+	TATA-less	TAF1-enriched	88	178833	178823	-10	YER013W	119.4	0.000188404	0.034600581	0.109430257	1	1	0.008638825	0.483042471	1	0.140757276	2	TRUE
1489	1502	YER015W	chrV	+	TATA-less	TAF1-enriched	99	184511	184468	-43	YER015W	168.4	0.45430959	NA	NA	NA	NA	NA	NA	NA	NA	NA	NA
1490	1503	ST4541	chrV	-	TATA-less	TAF1-enriched	45	188031	188074	-43	ST4541	66.2	0.001206733	0.077378204	0.027269973	1	0.392152677	1	0.248761941	0.178661274	1	1	TRUE
1491	1504	YER016W	chrV	+	TATA-less	TAF1-enriched	223	188309	188252	-57	YER016W	943.3	0.000238224	0.118785873	0.078957132	0.370326446	0.126939279	0.14528208	0.126939279	0.048789853	1	1	TRUE
1492	1505	YER017C	chrV	-	TATA-less	TAF1-depleted	937	191814	191869	-55	YER017C	285.2	0.000171926	0.007044265	1	1	1	0.00021519	1	1	1	2	TRUE
1493	1506	YER019W	chrV	+	TATA-less	TAF1-depleted	77	192337	192372	35	YER019W	331.3	0.00092209	0.378949323	0.009508897	0.509607653	0.426776236	0.394577923	0.16048502	0.097109622	0.509607653	1	TRUE
1494	1507	YER018C	chrV	-	TATA-less	TAF1-enriched	949	192569	192679	-110	YER018C	148.2	0.019588988	1	0.006541208	1	1	1	1	0.256205329	1	1	TRUE
1495	1508	orphan	chrV	+	TATA-less	TAF1-enriched	315	192887	192851	-36	orphan	565	0.053481097	NA	NA	NA	NA	NA	NA	NA	NA	NA	NA
1496	1509	YER019C-A	chrV	-	TATA-less	TAF1-enriched	2382	194549	194591	-42	YER019C-A	3026.9	0.000393007	0.2114363	0.034646796	0.557425437	0.192332186	0.028668981	0.133804254	0.704915271	0.557425437	2	TRUE
1497	1510	YER020W	chrV	+	TATA-containing	TAF1-depleted	1641	195286	195109	-177	YER020W	802.9	0.001212073	0.032773319	0.102006343	0.13769302	0.709012626	0.015086542	0.383885676	0.629964708	0.13769302	2	TRUE
1498	1511	YER021W	chrV	+	TATA-less	TAF1-enriched	1597	196981	196891	-90	YER021W	2982.7	0.002875495	0.502096903	0.008771006	0.31835317	0.472911344	0.197670796	0.189197227	0.442243925	0.31835317	1	TRUE
1499	1512	YER022W	chrV	+	TATA-less	TAF1-enriched	69	198831	198793	-38	YER022W	110.9	0.002854879	0.299955939	0.197656836	0.077048784	0.506015447	0.006082984	0.506015447	0.489531705	0.158181573	1	TRUE
1500	1513	YER023W	chrV	+	TATA-less	TAF1-enriched	3373	201088	201043	-45	YER023W	996.6	0.001075253	0.024886882	0.268919394	0.550666802	0.550666802	0.046150258	0.160275948	0.441053496	0.550666802	2	TRUE
1501	1514	orphan	chrV	+	TATA-less	TAF1-enriched	159	202889	202840	-49	orphan	198.7	0.000802072	0.050530959	0.209888893	0.182640942	0.993476669	0.020802671	0.167056847	0.64992574	0.269704627	1	TRUE
1502	1516	ANT142	chrV	-	TATA-less	TAF1-enriched	97	204568	204597	-29	ANT142	30.5	0.000981878	0.005622585	1	0.185369953	1	1	1	0.456520962	0.002097783	2	TRUE
1503	1517	YER025W	chrV	+	TATA-less	TAF1-enriched	11937	205246	205215	-31	YER025W	10356.2	0.000253531	0.40880324	0.006647518	0.174698941	0.477118212	0.079737053	0.219448392	0.676536689	0.174698941	1	TRUE
1504	1518	YER026C	chrV	-	TATA-containing	TAF1-depleted	1228	208523	208494	29	YER026C	7198.3	0.004397691	0.008718952	0.929941989	0.847257908	0.403898288	0.053956453	0.077451599	0.803616705	0.31964164	1	TRUE
1505	1519	YER027C	chrV	-	TATA-less	TAF1-enriched	265	210271	210311	-40	YER027C	904	0.000183296	0.021269694	0.141165401	0.483409068	1	0.006641535	1	1	0.106981707	2	TRUE
1506	1520	YER028C	chrV	-	TATA-containing	TAF1-depleted	191	211772	211944	-172	YER028C	27.9	0.096559274	NA	NA	NA	NA	NA	NA	NA	NA	NA	NA
1507	1521	YER029C	chrV	-	TATA-less	TAF1-enriched	185	213193	213225	-32	YER029C	337.6	0.000166955	0.056860758	0.090496987	1	1	0.013777548	0.06368915	1	1	1	TRUE
1508	1522	YER031C	chrV	-	TATA-less	TAF1-enriched	1341	214733	214783	-50	YER031C	1632.8	0.00014607	0.105636904	0.099099108	0.07630151	0.152234354	0.022116206	0.133650892	1	1	1	TRUE
1509	1523	YER032W	chrV	+	TATA-less	TAF1-enriched	281	215031	215004	-27	YER032W	203.6	0.002105471	0.006612804	0.57855814	0.520667227	0.264591844	0.190430264	0.264591844	0.382733089	0.264591844	1	TRUE
1510	1524	YER033C	chrV	-	TATA-less	TAF1-enriched	207	221474	221547	-73	YER033C	87	0.761830889	NA	NA	NA	NA	NA	NA	NA	NA	NA	NA
1511	1525	YER035W	chrV	+	TATA-less	TAF1-depleted	3100	222654	222648	-6	YER035W	2207	0.000335504	0.007218511	1	0.242043748	0.092622722	0.001037189	1	1	0.01929472	3	TRUE
1512	1526	CUT551	chrV	-	TATA-containing	TAF1-enriched	131	222998	223126	-128	CUT551	59.7	0.065411245	NA	NA	NA	NA	NA	NA	NA	NA	NA	NA
1513	1527	YER036C	chrV	-	TATA-containing	TAF1-enriched	7362	225229	225245	-16	YER036C	4954.6	0.000666101	0.115795437	0.195272168	0.39839204	0.39839204	0.020815776	0.39839204	0.27560733	0.073400475	1	TRUE
1514	1528	YER039C	chrV	-	TATA-less	TAF1-enriched	94	229475	229498	-23	YER039C	189.5	0.000859566	0.238703507	0.183752595	0.089867077	0.3584222	0.004647105	0.3584222	0.47421165	0.162038694	1	TRUE
1515	1529	YER040W	chrV	+	TATA-less	TAF1-enriched	6555	229753	229713	-40	YER040W	202	0.000212787	0.042522159	0.050179644	0.357867277	1	1	1	1	0.017538916	2	TRUE
1516	1530	orphan	chrV	+	TATA-less	TAF1-enriched	15	234648	234593	-55	orphan	4.5	0.815513291	NA	NA	NA	NA	NA	NA	NA	NA	NA	NA
1517	1531	YER042W	chrV	+	TATA-containing	TAF1-enriched	121	234922	234909	-13	YER042W	941.3	0.00054196	0.217441699	0.195310781	0.025239177	0.859250029	0.003866081	0.594735148	0.300370726	0.153558087	2	TRUE
1518	1532	YER043C	chrV	-	TATA-less	TAF1-enriched	51788	237139	237148	-9	YER043C	29049	0.0001506	0.017622091	1	1	1	0.000300598	1	1	0.005110261	3	TRUE
1519	1533	YER044C	chrV	-	TATA-containing	TAF1-depleted	1469	237930	238070	-140	YER044C	2940.2	0.034088415	0.023338537	0.355831255	0.320358841	0.136071505	0.19953133	0.136071505	0.261638448	0.320358841	1	TRUE
1520	1534	CUT109	chrV	+	TATA-less	TAF1-enriched	240	238640	238612	-28	CUT109	16.2	0.298001731	NA	NA	NA	NA	NA	NA	NA	NA	NA	NA
1521	1535	orphan	chrV	-	TATA-less	TAF1-enriched	844	241578	241652	-74	orphan	595.5	0.000748194	0.054954028	0.187315751	0.766537618	0.106760486	0.108331572	0.244604837	0.38987361	0.15089218	0	FALSE
1522	1536	orphan	chrV	+	TATA-less	TAF1-enriched	77	242550	242506	-44	orphan	146.2	0.000248948	0.013292234	1	0.058352058	0.343882483	0.000127957	1	1	0.058352058	2	TRUE
1523	1537	ST4562	chrV	-	TATA-less	TAF1-enriched	168	242778	242831	-53	ST4562	10.2	0.101894773	NA	NA	NA	NA	NA	NA	NA	NA	NA	NA
1524	1538	YER047C	chrV	-	TATA-less	TAF1-enriched	33	246667	246694	-27	YER047C	43	0.585208769	NA	NA	NA	NA	NA	NA	NA	NA	NA	NA
1525	1539	YER048C	chrV	-	TATA-less	TAF1-enriched	127	248223	248231	-8	YER048C	2555.2	0.000389761	0.054023305	0.185313267	0.314509997	0.330639514	0.101197895	0.089446568	0.08466805	0.804653784	0	FALSE
1526	1540	orphan	chrV	+	TATA-less	TAF1-enriched	0	249939	249875	-64	orphan	1.1	0.411885565	NA	NA	NA	NA	NA	NA	NA	NA	NA	NA
1527	1541	YER048W-A	chrV	+	TATA-less	TAF1-depleted	937	250687	250637	-50	YER048W-A	2760.8	0.025889819	0.348714526	1	0.286420202	0.206439564	0.168756656	0.144063406	0.459861037	0.286420202	0	FALSE
1528	1542	orphan	chrV	-	TATA-less	TAF1-enriched	12	251384	251402	-18	orphan	1.3	0.3074739	NA	NA	NA	NA	NA	NA	NA	NA	NA	NA
1529	1543	YER049W	chrV	+	TATA-less	TAF1-enriched	1060	251660	251642	-18	YER049W	1462	0.000283206	0.103404111	0.142726528	0.082678105	0.263114492	0.025069344	0.158247903	0.543722888	0.372390551	1	TRUE
1530	1544	YER050C	chrV	-	TATA-less	TAF1-enriched	198	254408	254446	-38	YER050C	1799.5	0.000525846	0.269294137	0.065599692	0.051218008	0.45959014	0.011836366	0.45959014	0.33971998	0.45959014	1	TRUE
1531	1545	YER051W	chrV	+	TATA-less	TAF1-enriched	100	254692	254643	-49	YER051W	100.2	0.007545498	0.071283676	0.291436997	0.823008322	0.351342094	0.323829849	0.036828889	0.772760223	0.823008322	1	TRUE
1532	1546	YER052C	chrV	-	TATA-containing	TAF1-depleted	7028	258027	258053	-26	YER052C	1999.9	0.001121544	0.066598443	0.092178614	0.049990698	0.856225902	0.131110378	0.856225902	0.338629856	0.364987466	1	TRUE
1533	1547	YER053C	chrV	-	TATA-less	TAF1-depleted	177	259582	259737	-155	YER053C	3607.3	0.000133552	1	0.000414279	1	1	1	1	1	1	1	TRUE
1534	1548	CUT110	chrV	+	TATA-less	TAF1-enriched	578	262012	261985	-27	CUT110	80.7	0.010795969	0.124311977	0.679029981	0.300168944	0.052060465	0.015336605	0.347761811	0.916774917	0.03825217	2	TRUE
1535	1549	YER055C	chrV	-	TATA-containing	TAF1-depleted	3123	265640	265811	-171	YER055C	3884.9	0.000253088	0.019807879	0.366598963	0.322645463	0.110663144	0.039454059	0.160380433	0.471034505	0.46307003	2	TRUE
1536	1550	YER056C	chrV	-	TATA-containing	TAF1-depleted	2935	268046	268200	-154	YER056C	1500.9	0.000237592	0.008242298	1	1	1	0.00018673	1	1	0.28238919	2	TRUE
1537	1551	ST0889	chrV	+	TATA-less	TAF1-enriched	32	269040	268933	-107	ST0889	485	0.10425856	NA	NA	NA	NA	NA	NA	NA	NA	NA	NA
1538	1552	CUT554	chrV	-	TATA-containing	TAF1-enriched	259	269257	269288	-31	CUT554	552.4	0.39470218	NA	NA	NA	NA	NA	NA	NA	NA	NA	NA
1539	1553	orphan	chrV	+	TATA-less	TAF1-enriched	4	270152	270059	-93	orphan	2.5	0.788929922	NA	NA	NA	NA	NA	NA	NA	NA	NA	NA
1540	1554	YER056C-A	chrV	-	TATA-less	TAF1-enriched	97206	NA	270203	NA	YER056C-A	38654.2	0.000238942	0.27472627	0.04496953	0.882727312	0.15388086	0.027763035	0.068862016	0.144282982	0.882727312	2	TRUE
1541	1555	ST0890	chrV	+	TATA-less	TAF1-enriched	117	270695	270693	-2	ST0890	32.4	0.001353436	0.233437211	0.04543234	0.022121973	0.897423756	0.019804778	0.651839939	0.83519927	0.245947811	3	TRUE
1542	1556	YER057C	chrV	-	TATA-less	TAF1-depleted	30503	271147	271169	-22	YER057C	4310.7	0.000187395	0.015485372	1	0.002807787	1	0.001042109	1	1	0.061828865	3	TRUE
1543	1557	YER058W	chrV	+	TATA-less	TAF1-enriched	112	271763	271736	-27	YER058W	217	0.000704483	0.023551784	1	0.326858006	0.117099836	0.067499093	0.095390433	0.089410865	0.15671016	1	TRUE
1544	1558	CUT555	chrV	-	TATA-less	TAF1-enriched	94	272062	272140	-78	CUT555	3.7	0.017110038	0.027348745	0.581204654	0.842438765	0.059512668	0.405724896	0.320283766	0.6006267	0.09034838	1	TRUE
1545	1559	YER059W	chrV	+	TATA-less	TAF1-enriched	655	272506	272463	-43	YER059W	418	0.001215307	0.087227698	0.249414896	0.017765403	1	0.138666862	0.035479948	1	1	2	TRUE
1546	1560	YER060W	chrV	+	TATA-containing	TAF1-enriched	130	274473	274471	-2	YER060W	382.1	0.001849007	0.101277217	0.452611964	0.021985394	0.743492838	0.00310469	0.743492838	0.672693684	0.326250455	2	TRUE
1547	1561	YER061C	chrV	-	TATA-less	TAF1-enriched	88	279423	279597	-174	YER061C	669.3	0.000999006	0.009655611	1	0.455038088	0.803349901	0.000842617	0.803349901	0.747849866	0.455038088	2	TRUE
1548	1562	YER062C	chrV	-	TATA-containing	TAF1-enriched	1065	280836	280823	13	YER062C	2298	0.000342127	0.041541927	0.388227196	0.282123433	0.240659579	0.018457166	0.078406169	0.704915271	0.171031661	2	TRUE
1549	1563	orphan	chrV	+	TATA-less	TAF1-enriched	13	281351	281251	-100	orphan	16.9	0.275391999	NA	NA	NA	NA	NA	NA	NA	NA	NA	NA
1550	1564	orphan	chrV	-	TATA-less	TAF1-enriched	172	281351	281354	-3	orphan	16.6	0.486177297	NA	NA	NA	NA	NA	NA	NA	NA	NA	NA
1551	1565	YER063W	chrV	+	TATA-less	TAF1-enriched	1488	281828	281647	-181	YER063W	1749	0.000235695	0.117186207	0.040486191	0.552459463	0.146448107	0.249967429	0.086120427	0.088317864	1	1	TRUE
1552	1566	YER064C	chrV	-	TATA-containing	TAF1-depleted	311	284221	284312	-91	YER064C	698.4	0.000341859	0.195577279	0.079186362	0.203686642	0.06319913	0.100796088	0.192332186	0.247223381	0.203686642	0	FALSE
1553	1567	YER065C	chrV	-	TATA-less	TAF1-depleted	410	287143	287245	-102	YER065C	97.1	0.371912636	NA	NA	NA	NA	NA	NA	NA	NA	NA	NA
1554	1568	tS(UGA)E	chrV	-	TATA-containing	-	90	288493	288531	-38	tS(UGA)E	53.1	0.013263516	0.041669665	0.950784746	0.361365311	0.119926106	0.238646499	0.03318906	0.585378928	0.361365311	2	TRUE
1555	1569	orphan	chrV	+	TATA-less	TAF1-enriched	94	289382	289350	-32	orphan	47.4	0.020737826	0.177327336	0.490067552	0.809888258	0.099019832	1	0.079649109	0.087606421	0.13946445	0	FALSE
1556	1570	YER068W	chrV	+	TATA-less	TAF1-enriched	402	292972	292950	-22	YER068W	439.1	0.000206463	0.012870172	1	0.006435091	1	0.000435415	1	1	0.350201389	3	TRUE
1557	1571	YER069W	chrV	+	TATA-less	TAF1-depleted	686	295468	295400	-68	YER069W	161.8	0.013221886	0.184911764	0.000992647	0.565599102	0.40659632	0.155125718	0.565599102	0.496553136	0.084773791	1	TRUE
1558	1572	YER070W	chrV	+	TATA-containing	TAF1-depleted	3031	298915	298882	-33	YER070W	1648	0.001071788	0.003444374	1	1	1	0.008796952	1	1	0.248700944	2	TRUE
1559	1573	CUT559	chrV	-	TATA-less	TAF1-enriched	8	301574	301664	-90	CUT559	19.8	0.005938101	0.493831447	0.127518328	0.925354044	0.925354044	0.903726285	0.556731905	0.002320009	0.145259851	1	TRUE
1560	1574	YER071C	chrV	-	TATA-less	TAF1-enriched	130	302145	302291	-146	YER071C	466.7	0.001337181	0.12410269	0.214217314	0.801765331	0.017646597	0.06729247	0.012330844	0.991657856	0.451336183	2	TRUE
1561	1575	orphan	chrV	-	TATA-less	TAF1-depleted	46	302295	302472	-177	orphan	342.4	0.00094179	0.44479346	0.072808407	0.42332736	0.016306335	1	0.016306335	0.204594234	1	2	TRUE
1562	1576	YER072W	chrV	+	TATA-less	TAF1-depleted	50416	302790	302771	-19	YER072W	19075.9	0.001913504	0.009840957	0.612116608	0.438774631	0.438774631	0.171006404	0.438774631	0.061655862	0.438774631	1	TRUE
1563	1577	CUT561	chrV	-	TATA-containing	TAF1-enriched	49	303096	303333	-237	CUT561	300.2	0.004174961	0.025473854	0.000181334	0.590969963	0.590969963	0.061765144	0.230572881	0.940438196	0.264335353	2	TRUE
1564	1578	orphan	chrV	-	TATA-less	TAF1-enriched	15	303567	303652	-85	orphan	18.5	0.327748684	NA	NA	NA	NA	NA	NA	NA	NA	NA	NA
1565	1579	YER073W	chrV	+	TATA-containing	TAF1-depleted	1126	304025	303952	-73	YER073W	593.6	0.000571247	0.098236546	0.015141286	0.208291366	0.803786465	0.022218174	0.146884084	0.188836474	0.382346319	2	TRUE
1566	1580	orphan	chrV	+	TATA-containing	TAF1-enriched	15	306022	305950	-72	orphan	3.2	0.170680169	NA	NA	NA	NA	NA	NA	NA	NA	NA	NA
1567	1581	YER074W	chrV	+	TATA-less	TAF1-enriched	1051	306325	306285	-40	YER074W	1186	0.045077985	0.101559717	0.000376014	0.369821728	0.764989045	0.246956561	0.369821728	0.699552634	0.369821728	1	TRUE
1568	1582	YER074W-A	chrV	+	TATA-less	TAF1-enriched	545	307666	307615	-51	YER074W-A	2209.2	0.000438911	0.097022731	0.10932482	0.202067285	0.949142063	0.022308437	0.180418337	0.343655099	0.264326518	1	TRUE
1569	1583	YER075C	chrV	-	TATA-less	TAF1-depleted	7332	311174	311343	-169	YER075C	111.9	0.003278603	0.011720649	0.250163182	0.388238956	0.388238956	0.893666066	0.388238956	0.103890255	0.388238956	1	TRUE
1570	1584	YER076C	chrV	-	TATA-less	TAF1-enriched	57	313417	313658	-241	YER076C	97.2	0.084827742	NA	NA	NA	NA	NA	NA	NA	NA	NA	NA
1571	1585	orphan	chrV	-	TATA-less	TAF1-enriched	6	313680	313976	-296	orphan	85.8	0.007791304	0.007858503	0.078051687	0.108907955	0.359630648	0.220621461	0.045964192	0.157084784	0.646927616	2	TRUE
1572	1586	YER077C	chrV	-	TATA-less	TAF1-enriched	136	316502	316547	-45	YER077C	98.9	0.015724055	0.788743649	0.005537304	0.137584445	0.137584445	0.173930556	0.029594687	0.721362887	0.137584445	2	TRUE
1573	1587	CUT111	chrV	+	TATA-less	TAF1-enriched	10	316874	316760	-114	CUT111	17.2	0.137984273	NA	NA	NA	NA	NA	NA	NA	NA	NA	NA
1574	1588	YER078W-A	chrV	+	TATA-less	TAF1-enriched	28	318676	318575	-101	YER078W-A	4	0.1898701	NA	NA	NA	NA	NA	NA	NA	NA	NA	NA
1575	1589	YER079W	chrV	+	TATA-less	TAF1-depleted	177	318955	318843	-112	YER079W	248.9	0.005125002	0.103750529	1	0.01518988	0.669110536	0.016106792	0.124364331	0.897255929	0.669110536	2	TRUE
1576	1590	YER080W	chrV	+	TATA-less	TAF1-enriched	1174	319966	319932	-34	YER080W	2195.2	0.000309898	0.185970547	0.112487194	0.151934825	0.530118067	0.009381786	0.530118067	0.119069399	0.468811376	1	TRUE
1577	1591	CUT563	chrV	-	TATA-less	TAF1-enriched	19	321764	321840	-76	CUT563	52.2	0.029547995	0.108735928	0.724194773	0.113812492	0.012598586	0.026223013	0.916043249	0.041207868	0.504354226	3	TRUE
1578	1592	orphan	chrV	+	TATA-containing	TAF1-depleted	180	322211	322213	2	orphan	2597.8	0.000134167	1	0.001655877	1	1	1	0.004081634	1	1	2	TRUE
1579	1593	YER081W	chrV	+	TATA-containing	TAF1-depleted	401	322778	322659	-119	YER081W	656.1	0.00226514	0.009308135	0.474519906	0.630713014	0.682168937	0.020257377	0.682168937	0.890308668	0.682168937	2	TRUE
1580	1594	YER082C	chrV	-	TATA-containing	TAF1-enriched	364	325933	325976	-43	YER082C	1097.4	0.00032659	0.06277549	0.084397471	0.199770009	0.130445654	0.09785915	0.177670829	0.734192967	0.973772591	0	FALSE
1581	1595	CUT112	chrV	+	TATA-less	TAF1-enriched	0	326249	326223	-26	CUT112	15.1	0.079749952	NA	NA	NA	NA	NA	NA	NA	NA	NA	NA
1582	1596	YER083C	chrV	-	TATA-less	TAF1-enriched	5123	327010	327052	-42	YER083C	4560	0.000370614	0.023753458	0.199378787	0.055332844	0.456426019	0.013365737	0.860508974	0.820531304	0.106308885	2	TRUE
1583	1597	YER086W	chrV	+	TATA-less	TAF1-enriched	358	328441	328413	-28	YER086W	1666.6	0.000372316	0.11415048	0.061155859	0.255243364	0.574906021	0.02686311	0.255243364	0.469039673	0.255243364	1	TRUE
1584	1598	YER087W	chrV	+	TATA-less	TAF1-enriched	218	330538	330520	-18	YER087W	99.5	0.124830359	NA	NA	NA	NA	NA	NA	NA	NA	NA	NA
1585	1599	YER087C-B	chrV	-	TATA-less	TAF1-enriched	36617	332831	332873	-42	YER087C-B	670.7	0.000558626	0.09086722	0.290614069	0.466822271	0.466822271	0.032760285	0.185829854	0.060270741	0.145581171	1	TRUE
1586	1600	YER088C	chrV	-	TATA-less	TAF1-enriched	36973	335165	335246	-81	YER088C	323	0.013399716	0.144727373	1	1	1	0.258033759	0.001397254	1	1	1	TRUE
1587	1601	YER089C	chrV	-	TATA-less	TAF1-enriched	2953	337601	337657	-56	YER089C	10818.4	0.000411199	0.131476528	0.239404012	0.188997415	0.257717842	0.010802832	0.257717842	0.143974384	0.325559323	1	TRUE
1588	1602	YER090W	chrV	+	TATA-less	TAF1-enriched	19803	337918	337878	-40	YER090W	2245.5	0.000192515	0.072090621	0.082106222	0.104072796	0.183554435	0.181761222	0.183554435	0.848710066	0.126783138	0	FALSE
1589	1603	YER091C	chrV	-	TATA-containing	TAF1-depleted	2036	342149	342237	-88	YER091C	5729.6	NA	NA	NA	NA	NA	NA	NA	NA	NA	NA	NA
1590	1604	YER092W	chrV	+	TATA-less	TAF1-enriched	843	342903	342851	-52	YER092W	1372.6	0.000141698	0.021210041	0.043779433	1	0.040279303	1	1	1	1	3	TRUE
1591	1605	YER093C	chrV	-	TATA-less	TAF1-enriched	859	347632	347654	-22	YER093C	408.8	0.002813728	0.024868646	0.170378293	0.550290997	0.238963346	0.242915885	0.550290997	0.581759944	0.550290997	1	TRUE
1592	1606	orphan	chrV	-	TATA-less	TAF1-enriched	279	348391	348413	-22	orphan	946.3	0.00014587	0.003803303	1	1	1	0.000605621	1	1	1	2	TRUE
1593	1607	YER094C	chrV	-	TATA-less	TAF1-enriched	2538	349397	349436	-39	YER094C	4314.1	0.000210755	0.282994679	0.094905548	0.053920193	0.295832899	0.010722162	0.214448433	0.422936569	0.239559811	1	TRUE
1594	1608	orphan	chrV	+	TATA-less	TAF1-enriched	18	353757	353731	-26	orphan	17.2	0.001006351	0.071252423	0.19181254	0.025543622	0.267642619	0.008968002	0.431164145	0.177620988	0.204383655	2	TRUE
1595	1609	tE(UUC)E2	chrV	+	TATA-less	-	3871	354937	354923	-14	tE(UUC)E2	285.8	0.1218063	NA	NA	NA	NA	NA	NA	NA	NA	NA	NA
1596	1610	YER100W	chrV	+	TATA-less	TAF1-enriched	625	359550	359285	-265	YER100W	88.4	0.534199048	NA	NA	NA	NA	NA	NA	NA	NA	NA	NA
1597	1611	YER101C	chrV	-	TATA-less	TAF1-enriched	231	361785	361830	-45	YER101C	253.4	0.00067371	0.058056493	0.149918794	0.236836298	0.840558748	0.034950411	0.243276125	0.323672622	0.338258844	1	TRUE
1598	1612	orphan	chrV	-	TATA-less	TAF1-enriched	16	362014	362158	-144	orphan	20.8	0.52162781	NA	NA	NA	NA	NA	NA	NA	NA	NA	NA
1599	1613	YER102W	chrV	+	TATA-less	TAF1-enriched	233	362761	362700	-61	YER102W	1165.7	0.000818597	1	0.000988258	1	1	1	1	0.318188805	1	1	TRUE
1600	1614	YER103W	chrV	+	TATA-less	TAF1-depleted	82	364445	364409	-36	YER103W	1653	0.585208769	NA	NA	NA	NA	NA	NA	NA	NA	NA	NA
1601	1615	YER104W	chrV	+	TATA-less	TAF1-enriched	221	366817	366778	-39	YER104W	447.5	0.000794674	0.017759749	0.506454167	0.119993172	0.715940235	0.027847806	0.274978322	0.34744348	0.274978322	2	TRUE
1602	1616	YER105C	chrV	-	TATA-less	TAF1-enriched	472	371997	372034	-37	YER105C	1598.5	0.000487088	0.014868974	0.552996352	0.141337194	0.607895286	0.005402321	0.607895286	0.50772543	0.231233708	2	TRUE
1603	1617	YER109C	chrV	-	TATA-less	TAF1-enriched	79	377749	377782	-33	YER109C	280.2	0.000524935	0.264580122	0.029814613	0.753848906	0.250246611	0.025636624	0.557246948	0.486772462	0.034466079	3	TRUE
1604	1618	YER110C	chrV	-	TATA-less	TAF1-enriched	13594	382187	382215	-28	YER110C	4506.4	0.000164488	0.021136895	0.164639843	0.044789429	1	0.028628622	1	1	0.044789429	4	TRUE
1605	1619	YER111C	chrV	-	TATA-less	TAF1-enriched	89	386012	386130	-118	YER111C	190.4	0.018719777	0.025858386	1	1	0.165128413	0.051605004	1	1	1	1	TRUE
1606	1620	YER112W	chrV	+	TATA-less	TAF1-enriched	219	387369	387191	-178	YER112W	2806.6	0.001483375	0.538242505	0.012731259	0.188064023	0.222460634	0.319855769	0.188064023	0.164981426	0.247762943	1	TRUE
1607	1621	YER113C	chrV	-	TATA-less	TAF1-depleted	353	389980	390132	-152	YER113C	262.5	0.00072722	0.107081808	0.127620622	0.238194809	0.113945493	0.22552068	0.066140641	0.133090804	0.670642903	0	FALSE
1608	1622	YER114C	chrV	-	TATA-less	TAF1-enriched	1264	393964	393976	-12	YER114C	408	0.585208769	NA	NA	NA	NA	NA	NA	NA	NA	NA	NA
1609	1623	CUT115	chrV	+	TATA-less	TAF1-enriched	24	395308	395254	-54	CUT115	6.1	0.529171162	NA	NA	NA	NA	NA	NA	NA	NA	NA	NA
1610	1624	YER116C	chrV	-	TATA-less	TAF1-enriched	69	396228	396271	-43	YER116C	321.3	0.000141698	0.043779433	0.021210041	1	1	1	0.040279303	1	1	3	TRUE
1611	1625	YER117W	chrV	+	TATA-less	TAF1-enriched	8970	396790	396741	-49	YER117W	19052.3	0.000438722	1	0.000967428	1	1	1	0.12133525	1	1	1	TRUE
1612	1626	YER118C	chrV	-	TATA-containing	TAF1-enriched	629	399196	399232	-36	YER118C	230.3	0.015410119	0.636498965	0.013096028	0.130362364	0.916249494	0.47117293	0.451875083	0.291539579	0.916249494	1	TRUE
1613	1627	YER119C	chrV	-	TATA-less	TAF1-enriched	339	400830	400868	-38	YER119C	151.7	0.000534104	0.010925908	0.064715162	1	1	1	1	1	1	1	TRUE
1614	1628	YER120W	chrV	+	TATA-less	TAF1-enriched	22907	401139	401109	-30	YER120W	1872.9	0.000744789	0.126698507	0.06861391	0.354972633	0.136744913	0.232418056	0.056614185	0.294280303	0.669890431	0	FALSE
1615	1629	YER122C	chrV	-	TATA-containing	TAF1-enriched	538	404363	404433	-70	YER122C	1178.4	0.001052563	0.780072437	0.003541573	0.376890765	0.143904591	0.253964029	0.057011339	0.153877763	0.376890765	1	TRUE
1616	1630	YER123W	chrV	+	TATA-less	TAF1-enriched	197	404674	404625	-49	YER123W	371.9	0.000332991	0.201962511	0.144768034	0.110166058	0.162183257	0.039179614	0.162183257	0.071151623	0.841730153	1	TRUE
1617	1631	YER124C	chrV	-	TATA-containing	TAF1-depleted	691	408946	409102	-156	YER124C	1883.7	0.007841938	0.031527634	0.467027584	0.252974851	0.252974851	0.139996284	0.252974851	0.754243042	0.252974851	1	TRUE
1618	1632	CUT564	chrV	-	TATA-less	TAF1-enriched	1	409323	409357	-34	CUT564	35.7	0.052441433	NA	NA	NA	NA	NA	NA	NA	NA	NA	NA
1619	1633	YER126C	chrV	-	TATA-less	TAF1-enriched	5675	414209	414208	1	YER126C	3936.8	0.000556031	0.003783872	1	0.094484315	0.417800728	0.030865323	0.417800728	0.295552368	0.360886128	2	TRUE
1620	1634	YER127W	chrV	+	TATA-less	TAF1-enriched	305	414502	414464	-38	YER127W	327.6	0.000502788	0.158016056	0.132094404	0.039204862	1	0.007766183	1	0.351479007	0.191568727	2	TRUE
1621	1635	CUT566	chrV	-	TATA-less	TAF1-enriched	33	416492	416551	-59	CUT566	21.1	0.59947679	NA	NA	NA	NA	NA	NA	NA	NA	NA	NA
1622	1636	CUT116	chrV	+	TATA-less	TAF1-enriched	6	421985	421929	-56	CUT116	0.1	0.677060661	NA	NA	NA	NA	NA	NA	NA	NA	NA	NA
1623	1637	YER130C	chrV	-	TATA-containing	TAF1-depleted	970	422354	422507	-153	YER130C	7028.1	0.000424914	0.054960787	0.486129014	0.077854588	0.564308097	0.006644828	0.089989319	0.661557113	0.222189431	1	TRUE
1624	1638	YER131W	chrV	+	TATA-less	TAF1-enriched	902	423719	423536	-183	YER131W	5024.3	0.066057923	NA	NA	NA	NA	NA	NA	NA	NA	NA	NA
1625	1639	ANT145	chrV	-	TATA-less	TAF1-depleted	14	424790	424843	-53	ANT145	58.3	0.074071452	NA	NA	NA	NA	NA	NA	NA	NA	NA	NA
1626	1640	YER132C	chrV	-	TATA-less	TAF1-enriched	1399	430842	430891	-49	YER132C	102.2	0.017390724	0.361558599	0.003212877	0.043017092	0.234868694	0.266771724	0.786889439	0.711251447	0.967325848	2	TRUE
1627	1642	CUT567	chrV	-	TATA-containing	TAF1-enriched	20041	431379	431377	2	CUT567	1339	0.026747036	0.033971002	0.033971002	0.357142371	0.648200078	0.676181864	0.10220531	0.772457142	0.357142371	2	TRUE
1628	1643	YER133W	chrV	+	TATA-less	TAF1-enriched	6817	432497	432433	-64	YER133W	2159.1	0.000381981	0.291492146	0.085813957	0.081586226	0.195027351	0.024554602	0.195027351	0.543604654	0.081586226	1	TRUE
1629	1644	CUT568	chrV	-	TATA-less	TAF1-enriched	255	432798	432830	-32	CUT568	194.6	0.0022173	0.178376535	0.198228243	0.103499529	0.138255743	0.050524929	0.565218987	0.263174971	0.554314662	0	FALSE
1630	1645	tH(GUG)E2	chrV	-	TATA-less	-	100	434590	434623	-33	tH(GUG)E2	42.1	0.030264289	0.016167724	1	0.510110448	0.510110448	0.024836494	0.510110448	0.723109761	0.510110448	2	TRUE
1631	1646	orphan	chrV	+	TATA-less	TAF1-enriched	3	435634	435544	-90	orphan	0.2	0.716823379	NA	NA	NA	NA	NA	NA	NA	NA	NA	NA
1632	1647	YER134C	chrV	-	TATA-less	TAF1-enriched	1362	437765	437849	-84	YER134C	587.9	0.000444128	0.15245599	0.156774111	0.060420225	0.146171624	0.015345574	0.233284561	0.80030565	0.273966897	1	TRUE
1633	1648	orphan	chrV	+	TATA-less	TAF1-enriched	166	439197	439181	-16	orphan	3.4	0.138869779	NA	NA	NA	NA	NA	NA	NA	NA	NA	NA
1634	1649	YER136W	chrV	+	TATA-less	TAF1-enriched	1964	439688	439521	-167	YER136W	1527.1	0.000274443	0.073134299	0.141163287	0.15549046	0.17491965	0.12227859	0.066453569	0.24022977	0.533663313	0	FALSE
1635	1650	YER137C	chrV	-	TATA-less	TAF1-depleted	38	442012	442086	-74	YER137C	1.5	0.306472083	NA	NA	NA	NA	NA	NA	NA	NA	NA	NA
1636	1651	orphan	chrV	+	TATA-containing	TAF1-depleted	3786	442625	442457	-168	orphan	11943.4	0.803194073	NA	NA	NA	NA	NA	NA	NA	NA	NA	NA
1637	1652	orphan	chrV	-	TATA-less	TAF1-enriched	81	452976	453121	-145	orphan	13.2	0.004979984	0.701393527	0.006656138	0.09938562	0.746615136	0.016463067	0.301164923	0.573351484	0.145952962	2	TRUE
1638	1653	YER141W	chrV	+	TATA-less	TAF1-enriched	2533	453430	453427	-3	YER141W	2234.2	0.000224417	0.177973138	0.046453414	0.27191115	0.659160359	0.052863264	0.103533521	0.233806522	0.185762848	1	TRUE
1639	1654	YER142C	chrV	-	TATA-less	TAF1-enriched	147	456071	456103	-32	YER142C	185	0.001396539	0.032991619	0.369725168	0.114426553	0.220867459	0.058437481	0.220867459	0.560379817	0.628920645	1	TRUE
1640	1655	orphan	chrV	-	TATA-less	TAF1-enriched	1937	460181	460232	-51	orphan	568.1	0.003217444	0.016859358	0.116318803	0.190559491	1	0.011253599	1	1	0.008848528	3	TRUE
1641	1656	YER144C	chrV	-	TATA-less	TAF1-depleted	156	460553	460614	-61	YER144C	52.2	0.195466386	NA	NA	NA	NA	NA	NA	NA	NA	NA	NA
1642	1657	orphan	chrV	+	TATA-less	TAF1-enriched	171	461221	461130	-91	orphan	99.1	0.008268971	0.112995037	0.206938336	0.330771483	0.195641621	0.03010444	0.803230408	0.640537163	0.113324417	1	TRUE
1643	1658	ANT136	chrV	+	TATA-less	TAF1-enriched	139	461221	461180	-41	ANT136	99.9	0.004222997	0.105985529	0.251692622	0.263217893	0.27720409	0.024139159	0.891162145	0.313476604	0.095682931	1	TRUE
1644	1659	orphan	chrV	-	TATA-less	TAF1-enriched	659	461374	461407	-33	orphan	455.8	0.956915639	NA	NA	NA	NA	NA	NA	NA	NA	NA	NA
1645	1660	YER145C	chrV	-	TATA-containing	TAF1-depleted	1096	461751	461766	-15	YER145C	619.3	0.022426022	0.013900953	1	0.602953341	0.343884795	0.13723847	0.591120817	0.143156626	0.778405888	1	TRUE
1646	1661	YER146W	chrV	+	TATA-less	TAF1-enriched	2009	462625	462541	-84	YER146W	1116.8	0.000869679	0.034808479	0.305297808	0.046591816	0.685768483	0.010197226	0.87533364	0.856194419	0.046591816	4	TRUE
1647	1662	YER148W	chrV	+	TATA-less	TAF1-enriched	711	465154	465110	-44	YER148W	3067.9	0.000630885	0.187159334	0.094344002	0.078051961	0.048432372	0.25535759	0.048432372	1	1	2	TRUE
1648	1663	YER149C	chrV	-	TATA-less	TAF1-enriched	758	467481	467521	-40	YER149C	341.7	0.002381449	0.212170521	0.037583775	0.053852515	0.73872708	0.012807976	0.375225922	0.219154816	0.53105035	2	TRUE
1649	1664	YER150W	chrV	+	TATA-containing	TAF1-depleted	1885	468422	468335	-87	YER150W	3839	0.006149002	0.332600921	0.316737579	0.272753859	0.272753859	0.15680806	0.272753859	0.15680806	0.272753859	0	FALSE
1650	1665	YER151C	chrV	-	TATA-less	TAF1-enriched	6683	472418	472498	-80	YER151C	1072.6	0.000466395	0.253066937	0.022262248	0.13133881	0.275051293	0.106018758	0.275051293	0.407162576	0.31964164	1	TRUE
1651	1666	YER153C	chrV	-	TATA-less	TAF1-enriched	106	474684	474808	-124	YER153C	91.3	0.00191605	0.038895337	0.39457944	0.047990344	0.856101834	0.048474113	0.402248939	0.192127597	0.856101834	3	TRUE
1652	1667	YER154W	chrV	+	TATA-less	TAF1-enriched	2285	475056	475010	-46	YER154W	365.7	0.200551475	NA	NA	NA	NA	NA	NA	NA	NA	NA	NA
1653	1668	YER155C	chrV	-	TATA-less	TAF1-enriched	3519	482962	483086	-124	YER155C	341.8	0.005129993	0.053924721	0.778171343	0.080816163	0.643446748	0.018330353	0.169934708	0.456660768	0.479871786	1	TRUE
1654	1669	orphan	chrV	-	TATA-less	TAF1-enriched	2598	482962	483098	-136	orphan	320.6	0.003190535	0.132867655	0.421671443	0.048570931	0.613341142	0.006225319	0.260706776	0.658549907	0.546434252	2	TRUE
1655	1670	CUT118	chrV	+	TATA-less	TAF1-enriched	82	483364	483319	-45	CUT118	48.7	0.083992729	NA	NA	NA	NA	NA	NA	NA	NA	NA	NA
1656	1671	YER156C	chrV	-	TATA-less	TAF1-enriched	3366	484313	484357	-44	YER156C	2907.5	NA	NA	NA	NA	NA	NA	NA	NA	NA	NA	NA
1657	1672	YER157W	chrV	+	TATA-less	TAF1-enriched	199	484808	484772	-36	YER157W	646.3	0.000280378	0.005507467	1	0.267241432	1	0.000511616	1	1	1	2	TRUE
1658	1673	YER158W-A	chrV	+	TATA-containing	TAF1-enriched	1003	491536	491518	-18	YER158W-A	15.7	0.338087282	NA	NA	NA	NA	NA	NA	NA	NA	NA	NA
1659	1674	YER159C	chrV	-	TATA-less	TAF1-depleted	160	NA	492121	NA	YER159C	1182.2	0.001564833	0.006848644	0.753192913	0.080455625	0.453758573	0.024025517	0.802802948	0.747158239	0.080455625	2	TRUE
1660	1675	tR(ACG)E	chrV	-	TATA-less	-	14	492407	492440	-33	tR(ACG)E	21.7	NA	NA	NA	NA	NA	NA	NA	NA	NA	NA	NA
1661	1676	YER161C	chrV	-	TATA-less	TAF1-enriched	265	500353	500378	-25	YER161C	140.4	0.011849167	1	0.023963485	0.719042723	0.368468303	0.642346603	0.006974937	0.642346603	0.719042723	2	TRUE
1662	1677	CUT119	chrV	+	TATA-less	TAF1-enriched	617	500654	500635	-19	CUT119	25.2	0.121943343	NA	NA	NA	NA	NA	NA	NA	NA	NA	NA
1663	1678	YER162C	chrV	-	TATA-less	TAF1-depleted	227	502882	502929	-47	YER162C	189.5	0.009938725	0.228581805	0.022950346	0.425533306	0.425533306	0.303602009	0.790532306	0.731663736	0.425533306	1	TRUE
1664	1679	ST0954	chrV	+	TATA-less	TAF1-enriched	19899	504074	504068	-6	ST0954	1272.5	0.004917265	0.364041933	0.108805342	0.026374089	0.163905839	0.304451443	0.026374089	0.864101338	0.026374089	3	TRUE
1665	1680	YER164W	chrV	+	TATA-less	TAF1-enriched	166	505258	505177	-81	YER164W	125.9	0.000657557	0.067180287	0.125920321	0.267248774	0.651278942	0.063364104	0.220774359	0.164583956	0.651278942	0	FALSE
1666	1681	YER166W	chrV	+	TATA-less	TAF1-enriched	433	512511	512444	-67	YER166W	964.3	0.000895723	0.183157051	0.026862515	0.560823222	0.210078952	0.067313117	0.371906273	0.634144409	0.560823222	1	TRUE
1667	1682	YER167W	chrV	+	TATA-less	TAF1-enriched	24	518031	517918	-113	YER167W	28.9	0.002491661	0.067550862	0.226727035	0.077009929	0.954926636	0.110738372	0.414774918	0.185550462	0.424075465	0	FALSE
1668	1683	YER168C	chrV	-	TATA-less	TAF1-enriched	1387	522658	522662	-4	YER168C	787.9	0.000241489	0.077379861	0.099279718	0.375229999	0.265953409	0.091814242	0.151323238	0.118518452	0.375229999	0	FALSE
1669	1684	YER169W	chrV	+	TATA-less	TAF1-enriched	175	523158	523122	-36	YER169W	287.8	0.00142791	0.510144433	0.895203739	0.665098672	0.665098672	0.000860971	0.885267655	0.70947024	0.00741803	2	TRUE
1670	1685	YER170W	chrV	+	TATA-less	TAF1-enriched	339	525963	525951	-12	YER170W	145.1	0.012577962	0.291292848	0.349950573	0.247676268	0.105572818	0.172415103	0.155536874	0.200825123	0.321750338	0	FALSE
1671	1686	YER171W	chrV	+	TATA-containing	TAF1-enriched	210	527028	526993	-35	YER171W	472.4	0.048801341	1	0.071439551	0.581442657	0.639070871	0.47665199	0.52636862	0.04035328	0.26666074	1	TRUE
1672	1687	YER172C	chrV	-	TATA-less	TAF1-enriched	27	536074	536062	12	YER172C	455.1	0.004385547	0.010974756	0.538314833	1	0.150413352	1	1	0.416655025	1	1	TRUE
1673	1688	YER174C	chrV	-	TATA-less	TAF1-enriched	491	539256	539282	-26	YER174C	655.4	0.001078851	0.090151421	0.224475603	0.103874874	0.856598556	0.005118479	0.366245372	0.865273184	0.152941557	1	TRUE
1674	1689	ST4659	chrV	-	TATA-containing	TAF1-enriched	203	541398	541456	-58	ST4659	98.4	0.002422233	0.004383605	1	0.130991328	0.130991328	0.051216032	0.614682088	0.515764304	0.298171335	1	TRUE
1675	1690	YER176W	chrV	+	TATA-less	TAF1-enriched	22	541702	541648	-54	YER176W	112.7	0.000541087	0.027960956	0.439988962	0.069702597	0.678270715	0.019198431	0.738767457	0.468729318	0.069702597	2	TRUE
1676	1691	orphan	chrV	-	TATA-less	TAF1-enriched	140	544465	544543	-78	orphan	37.5	0.05754477	NA	NA	NA	NA	NA	NA	NA	NA	NA	NA
1677	1692	orphan	chrV	+	TATA-less	TAF1-enriched	57	545038	544908	-130	orphan	90.2	0.186028156	NA	NA	NA	NA	NA	NA	NA	NA	NA	NA
1678	1693	CUT571	chrV	-	TATA-less	TAF1-enriched	2489	544859	545034	-175	CUT571	478	0.000630099	0.238608408	0.16993957	0.04894049	0.35586364	0.000443842	0.941380219	0.874281397	0.027957232	3	TRUE
1679	1694	YER177W	chrV	+	TATA-less	TAF1-enriched	1496	545679	545562	-117	YER177W	12056.9	0.000580468	0.328383898	0.08355292	0.439949054	0.439949054	0.000734858	0.86067262	0.820740409	0.085418536	1	TRUE
1680	1695	orphan	chrV	-	TATA-less	TAF1-enriched	8	545898	545910	-12	orphan	1.5	0.147396258	NA	NA	NA	NA	NA	NA	NA	NA	NA	NA
1681	1696	YER178W	chrV	+	TATA-less	TAF1-enriched	10254	546836	546789	-47	YER178W	3466.2	0.000695393	0.196505597	0.016456413	0.399692792	0.399692792	0.151243616	0.399692792	0.276932162	0.399692792	1	TRUE
1682	1697	ST4661	chrV	-	TATA-less	TAF1-enriched	305	549159	549194	-35	ST4661	192.4	0.000141538	0.000426605	1	1	1	1	1	1	1	1	TRUE
1683	1698	YER180C-A	chrV	-	TATA-less	TAF1-enriched	207	551267	551368	-101	YER180C-A	44.7	NA	NA	NA	NA	NA	NA	NA	NA	NA	NA	NA
1684	1700	YER183C	chrV	-	TATA-containing	TAF1-enriched	98	553906	553970	-64	YER183C	286	0.585208769	NA	NA	NA	NA	NA	NA	NA	NA	NA	NA
1685	1701	YER184C	chrV	-	TATA-less	TAF1-enriched	46	NA	559012	NA	YER184C	251.5	0.007976232	0.142309187	0.002760855	0.215860251	0.018141745	0.933851572	0.573740969	0.245235696	0.359586253	2	TRUE
1686	1702	orphan	chrV	+	TATA-less	TAF1-enriched	13	560864	560810	-54	orphan	32.6	0.019887091	0.665848445	0.143835656	0.25167627	0.353435108	0.158722378	0.813017173	0.760087413	0.31695878	0	FALSE
1687	1703	ST0970	chrV	+	TATA-less	TAF1-enriched	30	563016	562915	-101	ST0970	39.3	0.483808421	NA	NA	NA	NA	NA	NA	NA	NA	NA	NA
1688	1704	CUT572	chrV	-	TATA-less	TAF1-enriched	73	NA	567592	NA	CUT572	106.1	0.010029061	0.008719394	0.51200679	0.072533877	0.58719732	0.020432664	0.58719732	0.248597803	0.072533877	2	TRUE
1689	1705	orphan	chrVI	-	TATA-less	TAF1-enriched	262	16432	16492	-60	orphan	145.9	0.001978904	0.218143221	0.010925908	1	1	1	0.177330783	1	1	1	TRUE
1690	1706	orphan	chrVI	+	TATA-less	TAF1-depleted	24	16723	16673	-50	orphan	54.1	0.026693947	0.08588665	1	1	1	0.001248899	1	1	1	1	TRUE
1691	1707	orphan	chrVI	-	TATA-less	TAF1-enriched	5	30876	31034	-158	orphan	22.2	0.160114901	NA	NA	NA	NA	NA	NA	NA	NA	NA	NA
1692	1708	YFL049W	chrVI	+	TATA-containing	TAF1-enriched	136	36821	36781	-40	YFL049W	122.8	0.014264241	0.213779833	0.197871228	0.385722584	0.564909348	0.052853145	0.208929381	0.340913846	0.470612584	0	FALSE
1693	1709	YFL048C	chrVI	-	TATA-less	TAF1-enriched	73	40155	40202	-47	YFL048C	2004.7	0.000560415	0.100098992	0.120022113	0.363430098	0.210301389	0.04349208	0.210301389	0.232298373	0.417598511	1	TRUE
1694	1710	YFL047W	chrVI	+	TATA-less	TAF1-enriched	129	40448	40413	-35	YFL047W	1604.3	NA	NA	NA	NA	NA	NA	NA	NA	NA	NA	NA
1695	1711	YFL045C	chrVI	-	TATA-less	TAF1-enriched	12903	44426	44467	-41	YFL045C	9737.8	0.000165452	0.006978401	1	0.030024515	1	0.000722997	1	1	0.051737898	3	TRUE
1696	1712	CUT121	chrVI	+	TATA-less	TAF1-enriched	36	44724	44679	-45	CUT121	29.5	0.012810653	0.289304838	0.194135589	0.090620849	0.100365454	0.131267697	0.242419504	0.991579843	0.110927706	0	FALSE
1697	1713	YFL044C	chrVI	-	TATA-less	TAF1-enriched	90	45534	45579	-45	YFL044C	873.7	0.000133552	0.000414279	1	1	1	1	1	1	1	1	TRUE
1698	1714	YFL042C	chrVI	-	TATA-less	TAF1-enriched	230	47731	47751	-20	YFL042C	993.2	0.005591151	0.672666374	0.020141433	1	0.027922274	0.51744805	0.203108758	0.100361014	1	2	TRUE
1699	1715	YFL041W	chrVI	+	TATA-containing	TAF1-enriched	209	49160	49121	-39	YFL041W	527.4	0.004405519	0.564357855	0.037399603	0.171306069	0.860775495	0.077378204	0.309036875	0.189096127	0.171306069	1	TRUE
1700	1716	ST0982	chrVI	+	TATA-less	TAF1-enriched	0	54632	54575	-57	ST0982	10.9	0.061922727	NA	NA	NA	NA	NA	NA	NA	NA	NA	NA
1701	1717	YFL039C	chrVI	-	TATA-containing	TAF1-depleted	38030	NA	54892	NA	YFL039C	107338	NA	NA	NA	NA	NA	NA	NA	NA	NA	NA	NA
1702	1718	ANT156	chrVI	+	TATA-less	TAF1-enriched	12	55075	55063	-12	ANT156	314.3	0.000373569	0.197237713	0.069221953	0.133402739	0.417594249	0.028799778	0.121388403	0.356451308	0.323559888	1	TRUE
1703	1719	YFL038C	chrVI	-	TATA-less	TAF1-enriched	1843	55977	56066	-89	YFL038C	6418.7	0.000374997	0.141026822	0.059547147	0.245650363	0.605860869	0.019727317	0.245650363	1	0.070923397	1	TRUE
1704	1720	YFL037W	chrVI	+	TATA-less	TAF1-enriched	921	56340	56271	-69	YFL037W	6868.7	0.000297841	0.313745068	0.017771695	0.58110397	0.162816659	0.048907317	0.119245822	0.324771754	0.58110397	2	TRUE
1705	1721	YFL036W	chrVI	+	TATA-less	TAF1-enriched	1399	58618	58581	-37	YFL036W	1174.3	0.000247295	0.023342202	0.147375619	0.112478498	1	0.015198135	0.427442662	1	0.49015296	2	TRUE
1706	1722	YFL034C-B	chrVI	-	TATA-less	TAF1-enriched	3617	63994	64034	-40	YFL034C-B	477.5	0.000228943	0.072323232	0.112417794	0.669721636	0.490816895	0.09020802	0.168197036	0.075237058	0.189385126	0	FALSE
1707	1723	YFL034C-A	chrVI	-	TATA-less	TAF1-enriched	9270	64954	64977	-23	YFL034C-A	1495.9	0.21974936	NA	NA	NA	NA	NA	NA	NA	NA	NA	NA
1708	1724	YFL034W	chrVI	+	TATA-less	TAF1-enriched	139	65315	65288	-27	YFL034W	329.9	0.001310568	0.528249349	0.008862199	0.511610377	0.972443514	0.396816068	0.201206877	0.040227093	0.511610377	2	TRUE
1709	1725	YFL033C	chrVI	-	TATA-less	TAF1-enriched	4119	74616	74665	-49	YFL033C	336.9	0.050396554	NA	NA	NA	NA	NA	NA	NA	NA	NA	NA
1710	1726	YFL031W	chrVI	+	TATA-less	TAF1-enriched	103262	NA	75113	NA	YFL031W	18224.9	NA	NA	NA	NA	NA	NA	NA	NA	NA	NA	NA
1711	1727	YFL029C	chrVI	-	TATA-less	TAF1-enriched	677	79158	79183	-25	YFL029C	358	0.026190423	0.114798566	0.283562401	0.088832266	0.574498779	0.144076253	0.562782622	0.991102989	0.088832266	0	FALSE
1712	1728	YFL028C	chrVI	-	TATA-less	TAF1-enriched	314	80184	80235	-51	YFL028C	451.8	0.006271234	0.015417167	1	1	1	0.004100944	1	1	1	2	TRUE
1713	1729	YFL027C	chrVI	-	TATA-less	TAF1-enriched	242	81860	81923	-63	YFL027C	723.6	0.00631355	0.192872098	0.062263759	0.046181108	0.661640764	0.051640403	0.661640764	0.194489153	0.022283515	2	TRUE
1714	1730	YFL026W	chrVI	+	TATA-less	TAF1-depleted	1492	82652	82550	-102	YFL026W	3696.3	0.001798048	0.346138659	0.016779756	1	0.190237234	1	0.008799289	0.521816877	1	2	TRUE
1715	1731	YFL025C	chrVI	-	TATA-less	TAF1-enriched	1194	87290	87313	-23	YFL025C	151.8	0.0008058	0.048806476	0.227935988	0.503853673	0.11261801	0.12134516	0.056304155	0.376834158	0.6346764	1	TRUE
1716	1732	ST0990	chrVI	+	TATA-less	TAF1-enriched	63	89777	89656	-121	ST0990	312.8	0.000242009	0.137537786	0.0849561	0.095428934	0.317088916	0.031346757	0.145406148	0.406790398	0.393077559	1	TRUE
1717	1733	YFL024C	chrVI	-	TATA-less	TAF1-enriched	1512	90611	90624	-13	YFL024C	410	0.000148506	0.003934821	1	0.017840797	1	0.00222638	1	1	1	3	TRUE
1718	1734	YFL023W	chrVI	+	TATA-less	TAF1-enriched	156	91011	90972	-39	YFL023W	238	0.000199502	0.200872423	0.049620192	0.14705063	0.370207421	0.061209582	0.081282545	0.135338769	0.832261598	1	TRUE
1719	1735	YFL022C	chrVI	-	TATA-less	TAF1-enriched	7907	94990	95071	-81	YFL022C	571	0.011231338	0.041037214	0.289907627	0.910257906	0.181399957	0.917219138	0.961472633	0.04597798	0.181399957	2	TRUE
1720	1736	YFL021W	chrVI	+	TATA-containing	TAF1-depleted	409	96128	96085	-43	YFL021W	670.8	0.00033724	0.120198003	0.051204883	0.754165581	0.137421446	0.083427854	0.791029239	0.225194648	0.150637033	0	FALSE
1721	1737	tP(UGG)F	chrVI	-	TATA-containing	-	6	101057	101194	-137	tP(UGG)F	4	0.091694479	NA	NA	NA	NA	NA	NA	NA	NA	NA	NA
1722	1738	YFL018C	chrVI	-	TATA-containing	TAF1-depleted	1406	103140	103210	-70	YFL018C	6705.5	0.000344913	0.135229658	0.094317753	0.19894982	0.152194631	0.097247642	0.152194631	0.097247642	0.980417468	0	FALSE
1723	1739	YFL017W-A	chrVI	+	TATA-less	TAF1-enriched	1816	103724	103645	-79	YFL017W-A	1398.1	0.001033279	0.144498248	0.088671021	0.174756631	0.38201428	0.07977736	0.131826379	0.317506266	0.809211625	0	FALSE
1724	1740	YFL017C	chrVI	-	TATA-containing	TAF1-depleted	274	104429	104484	-55	YFL017C	1742.2	0.011065366	1	0.004226323	0.580247165	0.580247165	0.475257752	0.424399404	0.302418011	0.580247165	1	TRUE
1725	1741	YFL016C	chrVI	-	TATA-less	TAF1-enriched	782	106071	106242	-171	YFL016C	508.3	0.005342717	0.047472255	1	0.008249692	0.587260525	0.083889058	0.587260525	0.483449754	0.032756661	3	TRUE
1726	1742	YFL013C	chrVI	-	TATA-less	TAF1-enriched	45	109929	109952	-23	YFL013C	359.4	0.001150379	0.260983016	0.015906655	0.668433908	0.14337088	0.580310787	0.04563804	1	0.668433908	2	TRUE
1727	1743	ST0998	chrVI	+	TATA-less	TAF1-enriched	154	110240	110230	-10	ST0998	58.4	0.000992124	0.07457422	0.36485515	0.217652174	0.760978402	0.072141481	0.128264576	0.054575604	0.553594737	0	FALSE
1728	1744	YFL010C	chrVI	-	TATA-less	TAF1-enriched	438	115738	115772	-34	YFL010C	754.5	0.002703946	0.029712954	0.158647303	0.352253055	0.333325569	0.22978256	0.333325569	1	1	1	TRUE
1729	1745	YFL009W	chrVI	+	TATA-less	TAF1-enriched	214	115988	115953	-35	YFL009W	64.5	0.007152755	0.298966063	0.016754571	0.641603117	0.769471329	0.295552368	0.360886128	0.295552368	0.417800728	1	TRUE
1730	1746	orphan	chrVI	+	TATA-containing	TAF1-enriched	1	NA	118796	NA	orphan	4.2	0.140554431	NA	NA	NA	NA	NA	NA	NA	NA	NA	NA
1731	1747	CUT575	chrVI	-	TATA-less	TAF1-enriched	95	NA	119127	NA	CUT575	6.4	0.008377849	0.24529393	0.24529393	0.28400528	0.397656188	0.265819755	0.223847081	0.065665223	0.28400528	0	FALSE
1732	1748	YFL008W	chrVI	+	TATA-less	TAF1-depleted	240	119428	119369	-59	YFL008W	162.1	0.001559403	0.107243773	0.128628098	0.25419137	0.532488137	0.029170106	0.261190298	0.420326646	0.438917004	1	TRUE
1733	1749	YFL007W	chrVI	+	TATA-less	TAF1-enriched	1815	123391	123356	-35	YFL007W	580.8	0.000202383	0.042716864	0.132336833	0.347959767	0.915505065	0.05929662	0.15797596	0.250782606	0.144048446	1	TRUE
1734	1750	YFL005W	chrVI	+	TATA-less	TAF1-enriched	1181	130362	130189	-173	YFL005W	8486.9	0.001330532	0.093866007	0.054411327	0.016193745	0.740368896	0.318193463	0.740368896	0.668803866	0.104623994	1	TRUE
1735	1751	orphan	chrVI	-	TATA-less	TAF1-depleted	33	NA	131383	NA	orphan	284.4	0.001170839	0.021274425	0.057184608	0.213068786	0.458940808	0.260925724	0.244510113	0.132982665	0.244510113	1	TRUE
1736	1752	YFL004W	chrVI	+	TATA-less	TAF1-depleted	546	131799	131659	-140	YFL004W	4011.7	0.0039453	0.020189951	0.173672834	0.841539308	0.066405859	0.181079911	0.0909755	0.796328227	0.841539308	1	TRUE
1737	1753	orphan	chrVI	+	TATA-less	TAF1-enriched	683	131799	131667	-132	orphan	4020.7	0.0039453	0.020189951	0.173672834	0.841539308	0.066405859	0.181079911	0.0909755	0.796328227	0.841539308	1	TRUE
1738	1754	YFR001W	chrVI	+	TATA-less	TAF1-enriched	236	149129	149086	-43	YFR001W	353	0.000179637	0.088724608	0.128563917	0.080448764	0.907225212	0.024022319	0.907225212	0.106966276	0.177489537	1	TRUE
1739	1755	CUT576	chrVI	-	TATA-less	TAF1-enriched	16	149436	149746	-310	CUT576	7.3	0.05807879	NA	NA	NA	NA	NA	NA	NA	NA	NA	NA
1740	1756	YFR002W	chrVI	+	TATA-less	TAF1-enriched	179	150055	150007	-48	YFR002W	930.5	0.000272323	0.2017878	0.035515735	0.805093805	0.205261715	0.137109487	0.039750228	0.10198496	0.805093805	2	TRUE
1741	1757	YFR004W	chrVI	+	TATA-less	TAF1-enriched	1002	153402	153351	-51	YFR004W	2127.2	0.002373391	0.255600087	0.082706196	0.258200316	0.658177908	0.008185316	0.481052285	0.567881043	0.28682624	1	TRUE
1742	1758	YFR005C	chrVI	-	TATA-less	TAF1-enriched	483	155850	155896	-46	YFR005C	369.7	0.007676783	0.02569527	0.261530943	0.740069604	0.240674836	0.859046106	0.633068472	0.206225459	0.740069604	1	TRUE
1743	1759	YFR007W	chrVI	+	TATA-less	TAF1-enriched	216	159316	159224	-92	YFR007W	133.9	0.104206989	NA	NA	NA	NA	NA	NA	NA	NA	NA	NA
1744	1760	YFR008W	chrVI	+	TATA-less	TAF1-enriched	503	160540	160519	-21	YFR008W	237.5	0.024604847	0.182230069	0.172383569	0.391673327	0.775238961	0.071905722	0.260453538	0.8452757	0.47015912	0	FALSE
1745	1761	tG(GCC)F1	chrVI	+	TATA-less	-	780	162242	162216	-26	tG(GCC)F1	3.2	0.714440307	NA	NA	NA	NA	NA	NA	NA	NA	NA	NA
1746	1762	YFR009W	chrVI	+	TATA-less	TAF1-enriched	1678	162480	162431	-49	YFR009W	5933.1	0.000168117	0.117820824	0.092125104	0.086664539	0.187539451	0.026979768	0.187539451	0.551517708	0.356254724	1	TRUE
1747	1763	YFR010W	chrVI	+	TATA-less	TAF1-enriched	1481	165015	164999	-16	YFR010W	942.3	0.000254877	0.453396741	0.039573222	0.100455155	0.233368221	0.022197042	0.233368221	0.170005084	0.333911438	2	TRUE
1748	1764	YFR011C	chrVI	-	TATA-less	TAF1-enriched	3074	167245	167282	-37	YFR011C	234.8	0.003645351	0.224286039	0.115193647	0.205707301	0.126410784	0.143203805	0.332227751	0.210644485	0.779948026	0	FALSE
1749	1765	YFR013W	chrVI	+	TATA-less	TAF1-enriched	1471	169906	169862	-44	YFR013W	89.1	0.000551776	0.011096197	0.654027371	0.123972526	0.140791159	0.099369696	0.140791159	0.245238395	0.670479254	1	TRUE
1750	1766	orphan	chrVI	-	TATA-less	TAF1-enriched	185	173299	173358	-59	orphan	308.9	0.00049143	0.268711183	0.173790481	0.101568052	0.06196856	0.015967053	0.190250293	0.672478596	0.512519572	1	TRUE
1751	1767	orphan	chrVI	-	TATA-less	TAF1-enriched	46	173610	173716	-106	orphan	624.7	0.000597308	0.03222442	0.650941938	0.157782237	0.722434053	0.002208237	0.637743129	0.127255251	0.060769913	2	TRUE
1752	1768	YFR015C	chrVI	-	TATA-containing	TAF1-depleted	6120	176395	176467	-72	YFR015C	1847.2	0.000307628	0.049226158	0.16723498	0.167154741	0.598715083	0.03556671	0.130288191	1	0.08720859	2	TRUE
1753	1769	orphan	chrVI	+	TATA-less	TAF1-enriched	117	177201	177060	-141	orphan	12.9	0.048965558	0.110509002	0.824583167	0.168845551	0.224728828	0.029752793	0.96126837	0.966661725	0.783174456	1	TRUE
1754	1770	YFR016C	chrVI	-	TATA-less	TAF1-depleted	442	180657	180780	-123	YFR016C	451.8	0.002207731	0.026314739	0.826470545	0.249015646	0.189234556	0.042807236	0.078215382	0.090098565	0.923471359	2	TRUE
1755	1771	YFR017C	chrVI	-	TATA-containing	TAF1-enriched	20517	182926	182927	-1	YFR017C	1052.3	0.00018605	0.115952898	0.195465189	0.030697108	0.156149536	0.001078109	0.073524807	1	0.011328628	3	TRUE
1756	1772	YFR018C	chrVI	-	TATA-less	TAF1-enriched	31	184244	184275	-31	YFR018C	632.8	0.00027035	0.150263514	0.208111198	0.041795679	0.139564566	0.008591825	0.158023109	0.734548273	0.212179611	2	TRUE
1757	1773	tS(GCU)F	chrVI	-	TATA-less	-	2799	191628	191623	5	tS(GCU)F	184.9	NA	NA	NA	NA	NA	NA	NA	NA	NA	NA	NA
1758	1774	orphan	chrVI	-	TATA-less	TAF1-enriched	21	192017	192097	-80	orphan	18.5	0.216291868	NA	NA	NA	NA	NA	NA	NA	NA	NA	NA
1759	1775	orphan	chrVI	+	TATA-less	TAF1-enriched	48	192291	192285	-6	orphan	107.7	0.002248401	0.076823606	0.421233914	0.147135746	0.437203941	0.01064808	0.294064397	0.346724142	0.232705521	1	TRUE
1760	1776	CUT577	chrVI	-	TATA-less	TAF1-enriched	58	194492	194539	-47	CUT577	42.4	0.001330351	0.042430873	0.662058133	0.012540893	0.864226603	0.001268428	0.451820091	0.658843255	0.123812224	3	TRUE
1761	1777	YFR021W	chrVI	+	TATA-less	TAF1-enriched	2447	194760	194718	-42	YFR021W	605.1	0.000141538	0.000426605	1	1	1	1	1	1	1	1	TRUE
1762	1778	YFR022W	chrVI	+	TATA-containing	TAF1-enriched	35	196593	196560	-33	YFR022W	226.5	0.047005849	0.077593112	0.569808462	0.022282495	0.313649512	0.110284744	0.408025248	0.465563833	0.117667929	1	TRUE
1763	1779	YFR024C-A	chrVI	-	TATA-less	TAF1-enriched	468	203418	203457	-39	YFR024C-A	1039.1	0.000663248	0.023127345	0.249974598	0.271922272	0.365588449	0.278090893	0.174733046	0.108258769	0.560811619	1	TRUE
1764	1780	YFR025C	chrVI	-	TATA-less	TAF1-enriched	786	204785	204774	11	YFR025C	701.9	0.000212189	0.429822661	0.05016489	0.039176205	0.617813819	0.007757219	0.218417841	1	0.039176205	3	TRUE
1765	1781	YFR028C	chrVI	-	TATA-less	TAF1-enriched	160	210080	210145	-65	YFR028C	629.9	0.000378631	0.09656187	0.142339276	0.228058731	0.247609332	0.119676734	0.247609332	0.077085898	0.228058731	0	FALSE
1766	1782	orphan	chrVI	+	TATA-less	TAF1-enriched	11	210352	210320	-32	orphan	1.6	0.979583353	NA	NA	NA	NA	NA	NA	NA	NA	NA	NA
1767	1783	YFR029W	chrVI	+	TATA-less	TAF1-enriched	860	210919	210855	-64	YFR029W	148.6	0.012894151	0.010082713	1	0.325841022	0.325841022	0.67243268	0.743283313	0.67243268	0.021873377	2	TRUE
1768	1784	orphan	chrVI	-	TATA-less	TAF1-enriched	0	212907	212939	-32	orphan	2.9	0.015574728	0.048475795	0.134959224	0.2215253	0.030854058	0.122794248	0.422155969	0.01061275	0.071272388	3	TRUE
1769	1785	YFR030W	chrVI	+	TATA-containing	TAF1-enriched	687	213251	213203	-48	YFR030W	103.8	0.021627872	1	0.097154062	0.408352345	0.092792	0.28579583	0.048656207	0.16276946	0.408352345	1	TRUE
1770	1786	YFR031C	chrVI	-	TATA-less	TAF1-enriched	86	220125	220139	-14	YFR031C	97.3	0.012140058	0.458062625	0.075989513	0.309590725	0.059841572	0.189602753	0.797773886	0.355521769	0.309590725	0	FALSE
1771	1787	YFR031C-A	chrVI	-	TATA-less	TAF1-enriched	5356	221398	221458	-60	YFR031C-A	11545	0.000138833	0.000422468	1	1	1	1	1	1	1	1	TRUE
1772	1788	orphan	chrVI	-	TATA-less	TAF1-enriched	1900	221398	221559	-161	orphan	11523.3	0.000138833	0.000422468	1	1	1	1	1	1	1	1	TRUE
1773	1789	YFR032C-A	chrVI	-	TATA-less	TAF1-enriched	11514	223751	223845	-94	YFR032C-A	1708.7	0.001076433	0.016312959	0.089345455	0.170993721	1	1	1	1	1	1	TRUE
1774	1790	YFR033C	chrVI	-	TATA-less	TAF1-depleted	3580	224813	224875	-62	YFR033C	4038.8	0.000133552	0.017290281	1	0.009115787	1	0.000761281	1	1	0.009115787	4	TRUE
1775	1791	orphan	chrVI	+	TATA-less	TAF1-enriched	18	225782	225675	-107	orphan	77.3	0.001443905	0.038842391	0.290702789	0.097236278	1	0.040191008	0.447194163	0.562015111	0.097236278	2	TRUE
1776	1792	YFR034C	chrVI	-	TATA-less	TAF1-enriched	325	225958	225980	-22	YFR034C	397.7	0.000907061	0.06107752	0.22691481	0.376044647	0.461551667	0.089474415	0.089893724	0.188952612	0.431907311	0	FALSE
1777	1793	orphan	chrVI	-	TATA-less	TAF1-enriched	173	226464	226513	-49	orphan	7	0.315507365	NA	NA	NA	NA	NA	NA	NA	NA	NA	NA
1778	1794	YFR035C	chrVI	-	TATA-containing	TAF1-enriched	492	226464	226772	-308	YFR035C	71.6	NA	NA	NA	NA	NA	NA	NA	NA	NA	NA	NA
1779	1795	YFR037C	chrVI	-	TATA-less	TAF1-enriched	3369	229159	229192	-33	YFR037C	1936.6	0.001727674	0.011997286	0.65371197	0.412758624	0.34206322	0.144511576	0.115817603	0.352111821	0.115817603	1	TRUE
1780	1796	YFR038W	chrVI	+	TATA-less	TAF1-enriched	406	229427	229394	-33	YFR038W	712.2	0.000836555	0.098773666	0.076210193	0.113571359	0.125495392	0.304513688	0.335647343	0.256422891	0.821163344	0	FALSE
1781	1797	YFR039C	chrVI	-	TATA-less	TAF1-enriched	216	233619	233673	-54	YFR039C	126.5	0.080644251	NA	NA	NA	NA	NA	NA	NA	NA	NA	NA
1782	1798	YFR040W	chrVI	+	TATA-less	TAF1-enriched	613	234188	234004	-184	YFR040W	329.5	0.000623692	0.318297988	0.045942287	0.038089738	0.711559139	0.007420097	0.4893796	0.787303935	0.091401985	3	TRUE
1783	1799	YFR041C	chrVI	-	TATA-less	TAF1-enriched	151	238243	238277	-34	YFR041C	764.9	0.000260427	0.067689352	0.096719054	0.325837813	1	0.001783322	1	1	1	1	TRUE
1784	1800	YFR042W	chrVI	+	TATA-less	TAF1-enriched	154	238465	238422	-43	YFR042W	385.7	0.000511481	0.098888252	0.264653976	0.090911957	0.535698232	0.02906795	0.145319344	0.309796805	0.090911957	1	TRUE
1785	1801	YFR044C	chrVI	-	TATA-less	TAF1-enriched	64840	241419	241455	-36	YFR044C	2102.4	NA	NA	NA	NA	NA	NA	NA	NA	NA	NA	NA
1786	1802	CUT579	chrVI	-	TATA-less	TAF1-enriched	143	245867	245900	-33	CUT579	32.8	0.006491967	0.32215928	0.137531761	0.083905787	0.455902922	0.028693016	0.94595858	0.418261461	0.455902922	1	TRUE
1787	1803	YFR048W	chrVI	+	TATA-less	TAF1-enriched	144	246150	246094	-56	YFR048W	228.8	0.00415572	0.040971811	0.152024383	0.206602805	0.319706578	0.138273293	1	1	1	1	TRUE
1788	1804	YFR049W	chrVI	+	TATA-less	TAF1-enriched	437	248404	248358	-46	YFR049W	277.8	0.000380112	0.010012659	0.472317156	0.189457306	0.341434336	0.053985413	0.341434336	0.219383823	0.450544794	1	TRUE
1789	1805	YFR050C	chrVI	-	TATA-less	TAF1-enriched	21435	249877	249912	-35	YFR050C	1103.2	0.001052816	0.312833799	0.012260948	1	0.219269393	1	0.014012361	1	1	2	TRUE
1790	1806	YFR051C	chrVI	-	TATA-less	TAF1-enriched	2284	251773	251828	-55	YFR051C	489	0.00068362	0.11829597	0.019131989	0.605240537	0.605240537	0.504588134	0.605240537	0.112357485	0.605240537	1	TRUE
1791	1807	CUT580	chrVI	-	TATA-less	TAF1-enriched	18	252237	252246	-9	CUT580	55.4	0.001603367	0.210212686	0.159788464	0.061990628	0.379520206	0.011113131	0.379520206	0.523811257	0.50849827	1	TRUE
1792	1808	YFR052W	chrVI	+	TATA-less	TAF1-enriched	16145	252524	252491	-33	YFR052W	2718.8	0.000232188	0.173945017	0.035618479	1	0.136380216	0.336347008	0.02134584	0.054503134	1	2	TRUE
1793	1809	YFR053C	chrVI	-	TATA-containing	TAF1-depleted	2615	NA	255155	NA	YFR053C	3062.3	0.000179673	0.072486085	0.187803248	0.237806775	0.149072074	0.12750833	0.149072074	0.062508916	0.237806775	0	FALSE
1794	1810	ST4738	chrVI	-	TATA-less	TAF1-enriched	209	263082	263200	-118	ST4738	111.4	0.598308332	NA	NA	NA	NA	NA	NA	NA	NA	NA	NA
1795	1811	CUT124	chrVI	+	TATA-less	TAF1-enriched	29	263567	263438	-129	CUT124	104.6	0.000442509	0.178480102	0.124132593	0.046354741	0.593010223	0.025266544	0.158811273	0.295806407	0.323164302	2	TRUE
1796	1812	CUT581	chrVI	-	TATA-less	TAF1-enriched	20	263823	263855	-32	CUT581	14.1	0.138464767	NA	NA	NA	NA	NA	NA	NA	NA	NA	NA
1797	1813	YFR055W	chrVI	+	TATA-containing	TAF1-depleted	530	264262	264179	-83	YFR055W	1432.8	0.000240171	0.053195148	1	0.008113117	0.84083025	0.000215153	0.84083025	0.795425006	0.055234254	2	TRUE
1798	1814	YGL263W	chrVII	+	TATA-less	TAF1-enriched	110	2799	2771	-28	YGL263W	74.9	0.002915547	0.591039855	0.032810608	0.150196628	0.432558912	0.05474988	0.432558912	0.118284533	0.947854174	1	TRUE
1799	1815	YGL257C	chrVII	-	TATA-less	TAF1-enriched	739	14248	14266	-18	YGL257C	446.6	0.00591217	0.117307133	0.358292703	0.960528626	0.498808025	0.020265531	0.192491939	0.701460532	0.181472109	1	TRUE
1800	1816	YGL256W	chrVII	+	TATA-less	TAF1-enriched	489	14703	14661	-42	YGL256W	480.2	0.00036985	0.023821298	0.414706736	1	1	0.000912255	1	1	0.06812127	2	TRUE
1801	1817	YGL255W	chrVII	+	TATA-less	TAF1-enriched	236	21052	20933	-119	YGL255W	1051.8	0.001651749	0.018422125	0.125506471	0.746885633	0.746885633	0.003537936	0.746885633	0.676922239	0.023868442	3	TRUE
1802	1818	YGL254W	chrVII	+	TATA-less	TAF1-enriched	116	22330	22295	-35	YGL254W	280.6	0.002749884	0.233805346	0.007616436	1	1	1	1	0.383796959	1	1	TRUE
1803	1819	orphan	chrVII	-	TATA-containing	TAF1-enriched	85	23043	23134	-91	orphan	140.1	0.005262424	0.003126093	0.548646733	0.183486128	0.936136758	0.062607554	0.312690743	0.419751212	0.183486128	1	TRUE
1804	1820	YGL253W	chrVII	+	TATA-containing	TAF1-depleted	10894	23920	23888	-32	YGL253W	4912.8	0.000524757	0.010864995	0.064510223	1	1	1	1	1	1	1	TRUE
1805	1821	YGL252C	chrVII	-	TATA-less	TAF1-enriched	288	27487	27532	-45	YGL252C	713.6	0.000186984	0.110190029	0.141683013	0.017325558	1	0.001337774	1	1	0.483977802	2	TRUE
1806	1822	ST1043	chrVII	+	TATA-less	TAF1-enriched	321	27808	27765	-43	ST1043	146	0.000797181	0.240912848	0.302079986	0.065575604	0.063106247	0.03108384	0.039019217	0.7822332	0.830464208	2	TRUE
1807	1823	ST4747	chrVII	-	TATA-less	TAF1-enriched	123	NA	35275	NA	ST4747	411.6	0.135837058	NA	NA	NA	NA	NA	NA	NA	NA	NA	NA
1808	1824	YGL247W	chrVII	+	TATA-less	TAF1-enriched	862	36977	36931	-46	YGL247W	519.7	0.000196252	0.063933435	0.070927953	0.43274629	0.15198169	0.042808617	0.15198169	1	1	1	TRUE
1809	1825	YGL246C	chrVII	-	TATA-less	TAF1-enriched	797	38773	38809	-36	YGL246C	1010.9	0.002530742	0.085293589	0.853725076	0.095672003	0.533465788	0.014078419	0.533465788	0.421435403	0.232103747	1	TRUE
1810	1826	YGL245W	chrVII	+	TATA-less	TAF1-enriched	4124	39050	39008	-42	YGL245W	19198.8	0.000141538	0.000426605	1	1	1	1	1	1	1	1	TRUE
1811	1827	YGL244W	chrVII	+	TATA-less	TAF1-enriched	133	41490	41451	-39	YGL244W	565.6	0.00083169	0.235530275	0.055336764	0.390907754	0.140379414	0.268018406	0.08169513	0.118926458	0.390907754	0	FALSE
1812	1828	orphan	chrVII	+	TATA-containing	TAF1-enriched	206	48626	48612	-14	orphan	202.5	0.00805808	0.055949117	0.064346319	1	1	0.367557706	1	1	1	0	FALSE
1813	1829	YGL238W	chrVII	+	TATA-less	TAF1-enriched	765	49586	49549	-37	YGL238W	2586.4	0.000418774	0.261720152	0.086705697	0.184668044	0.285662382	0.010837125	0.145410636	0.503939836	0.184668044	1	TRUE
1814	1830	YGL237C	chrVII	-	TATA-less	TAF1-enriched	2318	53571	53612	-41	YGL237C	180.2	0.001476292	0.030115925	0.77410037	0.142309164	0.363722327	0.058197624	0.124265201	0.240954669	0.142309164	1	TRUE
1815	1831	YGL236C	chrVII	-	TATA-less	TAF1-enriched	172	55762	55813	-51	YGL236C	49	0.037743903	0.219025545	0.061075299	0.191428571	0.878969539	0.010599544	0.238743761	0.701847802	0.13394814	1	TRUE
1816	1832	CUT585	chrVII	-	TATA-less	TAF1-enriched	183	56087	56115	-28	CUT585	216.6	0.002151838	0.388187034	0.135748896	0.09251827	0.021958842	0.029871551	0.642200438	0.494883408	0.205620144	2	TRUE
1817	1833	YGL234W	chrVII	+	TATA-less	TAF1-enriched	83928	56399	56380	-19	YGL234W	1410.2	0.01307721	0.41654503	0.019294176	0.310311599	0.139580766	0.448267496	0.55694737	0.836157564	0.55694737	1	TRUE
1818	1834	YGL233W	chrVII	+	TATA-less	TAF1-enriched	154	59132	59076	-56	YGL233W	620.9	0.002899733	0.143379751	0.038664927	0.239553056	0.239553056	0.041779841	0.239553056	0.761380141	0.239553056	2	TRUE
1819	1835	orphan	chrVII	+	TATA-less	TAF1-enriched	101	62110	62053	-57	orphan	1034.6	0.00052123	0.151805663	0.084287418	0.253537806	1	0.003197223	1	1	0.022395232	2	TRUE
1820	1836	YGL229C	chrVII	-	TATA-less	TAF1-depleted	63	67050	67188	-138	YGL229C	299.5	0.000309685	0.098236546	0.101248421	0.220116044	0.591286965	0.043632577	0.308752849	0.08400682	0.558508027	1	TRUE
1821	1837	YGL228W	chrVII	+	TATA-less	TAF1-enriched	241	67590	67552	-38	YGL228W	985.1	0.000346776	0.232792432	0.03678937	0.462197478	0.368855973	0.026776681	0.22042881	0.246003486	0.288234086	2	TRUE
1822	1838	ST1062	chrVII	+	TATA-less	TAF1-enriched	46	74731	74551	-180	ST1062	161.5	0.020240806	0.838145396	0.29348257	0.090226901	0.141442763	0.121730438	0.0252455	0.804437598	0.021360141	2	TRUE
1823	1839	orphan	chrVII	+	TATA-less	TAF1-depleted	159	74731	74691	-40	orphan	213.2	0.05914944	NA	NA	NA	NA	NA	NA	NA	NA	NA	NA
1824	1840	YGL225W	chrVII	+	TATA-containing	TAF1-enriched	13946	76884	76825	-59	YGL225W	977.3	0.066881588	NA	NA	NA	NA	NA	NA	NA	NA	NA	NA
1825	1841	YGL224C	chrVII	-	TATA-containing	TAF1-enriched	2333	78926	78966	-40	YGL224C	395.4	0.000385591	0.082060599	0.082060599	0.583111197	0.129166347	0.05520339	0.583111197	0.243196192	0.366005208	0	FALSE
1826	1842	orphan	chrVII	+	TATA-less	TAF1-enriched	52	79345	79293	-52	orphan	32.9	0.008095219	0.009873332	0.952970601	0.066774265	0.188058693	0.074619152	0.566389646	0.859322036	0.039464477	2	TRUE
1827	1843	YGL223C	chrVII	-	TATA-less	TAF1-enriched	65	80335	80378	-43	YGL223C	503.6	0.585208769	NA	NA	NA	NA	NA	NA	NA	NA	NA	NA
1828	1844	YGL222C	chrVII	-	TATA-less	TAF1-enriched	693	81195	81246	-51	YGL222C	1828.1	0.00020304	0.150862559	0.072555886	0.137956624	0.749243529	0.055477547	0.161069009	0.16572267	0.137956624	0	FALSE
1829	1845	YGL221C	chrVII	-	TATA-containing	TAF1-enriched	12774	82276	82311	-35	YGL221C	2441.6	0.000133552	0.012536753	1	0.006238807	1	0.000414279	1	1	1	3	TRUE
1830	1846	YGL219C	chrVII	-	TATA-less	TAF1-enriched	312	84232	84282	-50	YGL219C	2110.2	0.000454272	0.093437897	0.059129806	1	1	0.004844186	1	1	1	1	TRUE
1831	1847	YGL216W	chrVII	+	TATA-less	TAF1-depleted	302	84634	84618	-16	YGL216W	149.9	0.066881588	NA	NA	NA	NA	NA	NA	NA	NA	NA	NA
1832	1848	orphan	chrVII	-	TATA-less	TAF1-enriched	3	87077	87252	-175	orphan	3.6	0.348092608	NA	NA	NA	NA	NA	NA	NA	NA	NA	NA
1833	1849	YGL215W	chrVII	+	TATA-less	TAF1-enriched	394	87552	87469	-83	YGL215W	570.2	NA	NA	NA	NA	NA	NA	NA	NA	NA	NA	NA
1834	1850	YGL213C	chrVII	-	TATA-less	TAF1-enriched	149	91219	91264	-45	YGL213C	282	0.000434831	1	0.003752508	0.447727501	0.112413672	0.327019635	0.045333024	0.074738945	0.447727501	2	TRUE
1835	1851	YGL212W	chrVII	+	TATA-less	TAF1-enriched	76	91487	91434	-53	YGL212W	104.4	0.004813062	0.063062339	0.202905185	0.241843471	0.312464694	0.115704118	0.936106982	0.362442413	0.574697609	0	FALSE
1836	1852	YGL211W	chrVII	+	TATA-less	TAF1-enriched	261	92546	92505	-41	YGL211W	145.7	0.000859204	0.106158775	0.163336052	0.015867894	0.821530339	0.041496792	0.821530339	0.770883979	0.114326921	2	TRUE
1837	1853	YGL210W	chrVII	+	TATA-less	TAF1-enriched	119	93755	93752	-3	YGL210W	451.6	0.000477563	0.078557407	0.182038873	0.071478414	0.900846834	0.019969422	0.392258151	0.33990161	0.160398473	1	TRUE
1838	1854	ST4766	chrVII	-	TATA-less	TAF1-depleted	23	NA	94687	NA	ST4766	108.9	0.012004317	0.006591642	0.316430534	1	0.392202319	0.083816086	1	0.442233494	0.021083737	2	TRUE
1839	1855	YGL209W	chrVII	+	TATA-containing	TAF1-depleted	252	95928	95806	-122	YGL209W	584.5	0.000172817	0.097426507	0.140670757	0.022231907	1	0.007118226	0.226111003	1	0.226111003	2	TRUE
1840	1856	YGL208W	chrVII	+	TATA-less	TAF1-enriched	149	97334	97326	-8	YGL208W	168.8	0.132895083	NA	NA	NA	NA	NA	NA	NA	NA	NA	NA
1841	1857	XUT	chrVII	-	TATA-less	TAF1-enriched	9	98135	98144	-9	XUT	11.2	0.018562456	0.523480118	0.041801367	0.980086779	0.382333981	0.079979863	0.72052172	0.628846889	0.175046321	1	TRUE
1842	1858	YGL207W	chrVII	+	TATA-less	TAF1-enriched	150	98924	98904	-20	YGL207W	2083.3	0.001051094	0.190622129	0.00523865	1	1	1	1	1	1	1	TRUE
1843	1859	YGL206C	chrVII	-	TATA-less	TAF1-enriched	2725	107538	107587	-49	YGL206C	13594.4	0.000298285	0.166095259	0.045109996	0.175210187	0.419703811	0.05017279	0.196670274	0.416468007	0.175210187	1	TRUE
1844	1860	ST4769	chrVII	-	TATA-less	TAF1-enriched	106	110307	110374	-67	ST4769	49.6	0.475780423	NA	NA	NA	NA	NA	NA	NA	NA	NA	NA
1845	1861	orphan	chrVII	-	TATA-less	TAF1-enriched	569	110648	110707	-59	orphan	28.6	0.354092072	NA	NA	NA	NA	NA	NA	NA	NA	NA	NA
1846	1863	YGL204C	chrVII	-	TATA-less	TAF1-enriched	7042	112028	112055	-27	YGL204C	1973.8	0.019736437	0.939223338	0.285771001	0.860766057	0.055788353	0.295591655	0.055788353	0.108133277	0.336794165	0	FALSE
1847	1864	YGL203C	chrVII	-	TATA-less	TAF1-depleted	63	114703	114776	-73	YGL203C	563.9	0.002846858	0.667404659	0.03305827	0.799346926	0.009625604	0.817370668	0.009625604	0.279378836	0.799346926	3	TRUE
1848	1865	YGL202W	chrVII	+	TATA-less	TAF1-enriched	15275	115969	115930	-39	YGL202W	6619.9	0.000916393	0.043450114	1	0.005342859	1	0.000587025	1	1	1	3	TRUE
1849	1866	YGL201C	chrVII	-	TATA-less	TAF1-depleted	1740	120922	120959	-37	YGL201C	316.6	0.001047227	0.190545396	0.005230832	1	1	1	1	1	1	1	TRUE
1850	1867	tK(CUU)G1	chrVII	-	TATA-less	-	0	NA	122261	NA	tK(CUU)G1	1.2	0.320867078	NA	NA	NA	NA	NA	NA	NA	NA	NA	NA
1851	1868	YGL200C	chrVII	-	TATA-less	TAF1-enriched	8434	123300	123357	-57	YGL200C	3019.9	0.585208769	NA	NA	NA	NA	NA	NA	NA	NA	NA	NA
1852	1869	YGL198W	chrVII	+	TATA-less	TAF1-enriched	6634	123627	123584	-43	YGL198W	2651.4	NA	NA	NA	NA	NA	NA	NA	NA	NA	NA	NA
1853	1870	YGL199C	chrVII	-	TATA-less	TAF1-enriched	435	124228	124245	-17	YGL199C	90.1	0.032540452	0.488838777	0.723757222	0.035975513	0.458034262	0.030312481	0.349440201	0.478877044	0.258786592	2	TRUE
1854	1871	YGL197W	chrVII	+	TATA-less	TAF1-enriched	1456	124716	124647	-69	YGL197W	967.7	0.008632953	0.194215942	0.434287953	0.130789064	0.512792121	0.034209516	0.143599757	0.246906518	0.405261805	1	TRUE
1855	1872	CUT587	chrVII	-	TATA-less	TAF1-enriched	452	131249	131283	-34	CUT587	72.5	0.005059598	0.713588135	0.012564455	0.77220408	0.459411873	0.100947631	0.350917554	0.164188794	0.385132044	1	TRUE
1856	1873	YGL195W	chrVII	+	TATA-less	TAF1-enriched	15415	131544	131495	-49	YGL195W	669.2	0.00013803	0.019166235	0.019166235	1	1	1	1	1	1	2	TRUE
1857	1874	YGL194C-A	chrVII	-	TATA-less	TAF1-enriched	489	140167	140168	-1	YGL194C-A	463.7	0.000989149	0.083261445	0.254324615	0.368097986	0.046969089	0.330292515	0.05885472	0.058130877	0.37679076	1	TRUE
1858	1875	YGL194C	chrVII	-	TATA-less	TAF1-enriched	311	141749	141781	-32	YGL194C	114.2	0.000806952	0.032817306	0.090186436	0.063433787	1	0.230865479	1	0.628484407	0.353371591	1	TRUE
1859	1876	orphan	chrVII	-	TATA-less	TAF1-depleted	218	143896	144034	-138	orphan	347.5	0.000536952	0.028148892	0.348953637	0.251690468	0.624869247	0.063976303	0.155960621	0.379073249	0.155960621	1	TRUE
1860	1877	orphan	chrVII	+	TATA-less	TAF1-enriched	91	144495	144384	-111	orphan	35.8	0.013834306	0.152058182	0.269565355	0.719173426	0.132676647	0.083598041	0.132676647	0.64250822	0.719173426	0	FALSE
1861	1878	YGL191W	chrVII	+	TATA-less	TAF1-depleted	899	144914	144770	-144	YGL191W	1901.5	0.012729074	0.003858034	0.737943025	0.973419953	0.21764495	0.111484328	0.21764495	0.698655947	0.815578781	1	TRUE
1862	1879	CUT128	chrVII	+	TATA-less	TAF1-enriched	103	147895	147871	-24	CUT128	27.5	0.035535341	0.147121894	0.487254117	0.220878198	0.05092672	0.965929248	0.0435632	0.535680589	0.446664911	1	TRUE
1863	1880	orphan	chrVII	+	TATA-less	TAF1-enriched	1	148250	148232	-18	orphan	27.1	0.008664806	0.330313209	0.223659773	0.489256363	0.131566663	0.124037196	0.131566663	0.051563704	0.796199987	0	FALSE
1864	1881	YGL189C	chrVII	-	TATA-less	TAF1-enriched	2286	NA	149000	NA	YGL189C	1648.2	0.003047386	0.018843723	1	0.260340168	0.260340168	0.321286816	0.147845422	0.061719376	0.260340168	1	TRUE
1865	1882	YGL187C	chrVII	-	TATA-less	TAF1-enriched	276	NA	150634	NA	YGL187C	2691.6	0.000190683	0.018975065	1	0.018098762	1	0.00023229	1	1	0.035643588	4	TRUE
1866	1883	YGL186C	chrVII	-	TATA-containing	TAF1-depleted	4737	152764	152808	-44	YGL186C	1984.7	0.082516539	NA	NA	NA	NA	NA	NA	NA	NA	NA	NA
1867	1884	CUT129	chrVII	+	TATA-containing	TAF1-enriched	331	153223	153187	-36	CUT129	26.7	0.039231652	0.1567313	0.090352462	0.276806942	0.032108709	0.983527405	0.150047114	0.408876625	0.543365289	1	TRUE
1868	1885	YGL185C	chrVII	-	TATA-containing	TAF1-enriched	418	154309	154319	-10	YGL185C	462.5	0.000427397	0.125506471	0.250535974	0.069453103	0.865448187	0.019090963	0.424404758	0.172384046	0.135512504	1	TRUE
1869	1886	YGL182C	chrVII	-	TATA-less	TAF1-enriched	56	157569	157617	-48	YGL182C	13	0.286827615	NA	NA	NA	NA	NA	NA	NA	NA	NA	NA
1870	1887	YGL181W	chrVII	+	TATA-less	TAF1-enriched	221	157874	157859	-15	YGL181W	484.3	0.000585301	0.150163594	0.133896909	0.104044524	0.230667577	0.035853813	0.230667577	0.567091387	0.104044524	1	TRUE
1871	1888	YGL179C	chrVII	-	TATA-containing	TAF1-depleted	165	165132	165154	-22	YGL179C	2199.6	0.00054109	0.209453255	0.038235113	0.017217686	0.3621664	0.025814495	0.88559463	0.353020576	0.042324289	4	TRUE
1872	1889	orphan	chrVII	-	TATA-less	TAF1-enriched	166	NA	165560	NA	orphan	45.8	0.193429876	NA	NA	NA	NA	NA	NA	NA	NA	NA	NA
1873	1890	orphan	chrVII	+	TATA-less	TAF1-enriched	568	165943	165925	-18	orphan	5.2	0.474650715	NA	NA	NA	NA	NA	NA	NA	NA	NA	NA
1874	1891	ST4788	chrVII	-	TATA-less	TAF1-enriched	29	166073	166100	-27	ST4788	39.2	0.020661197	0.522267854	0.134175124	0.407463722	0.051959138	0.061279137	0.19146138	0.665829306	0.293081082	0	FALSE
1875	1892	CUT130	chrVII	+	TATA-containing	TAF1-enriched	372	166765	166580	-185	CUT130	104.2	0.049680724	0.382444516	0.683576793	0.028337531	0.013152595	0.599618202	0.755840192	0.416127888	0.267753698	2	TRUE
1876	1893	YGL178W	chrVII	+	TATA-less	TAF1-depleted	234	166765	166744	-21	YGL178W	153.9	0.633193701	NA	NA	NA	NA	NA	NA	NA	NA	NA	NA
1877	1894	YGL177W	chrVII	+	TATA-less	TAF1-enriched	27	167463	167306	-157	YGL177W	26.2	0.234534351	NA	NA	NA	NA	NA	NA	NA	NA	NA	NA
1878	1895	orphan	chrVII	+	TATA-less	TAF1-enriched	4900	167937	167848	-89	orphan	1661.7	0.000257327	0.204260274	0.26190923	0.073960755	0.68008188	0.092853281	0.100730949	0.056110909	0.051347695	0	FALSE
1879	1896	YGL176C	chrVII	-	TATA-less	TAF1-depleted	31	173056	173124	-68	YGL176C	191	0.039647732	0.065202963	0.803228657	0.629651892	0.629651892	0.008809402	0.64263341	0.533587306	0.629651892	1	TRUE
1880	1897	YGL173C	chrVII	-	TATA-less	TAF1-enriched	3985	NA	180436	NA	YGL173C	2251.1	0.000135669	0.047604321	0.113032935	0.030010684	1	0.005088258	1	1	1	3	TRUE
1881	1898	YGL172W	chrVII	+	TATA-less	TAF1-enriched	304	180712	180668	-44	YGL172W	252.6	0.008902487	0.187199781	0.077789845	0.259989876	0.466089261	0.175049768	0.208054	0.611061914	0.790979544	0	FALSE
1882	1899	YGL171W	chrVII	+	TATA-less	TAF1-enriched	3418	182407	182356	-51	YGL171W	1547	0.00055831	0.072833	0.083463758	1	0.062650109	1	0.062650109	0.071458779	0.062650109	0	FALSE
1883	1900	YGL169W	chrVII	+	TATA-less	TAF1-enriched	415	186027	186000	-27	YGL169W	320.7	0.000242225	0.030108244	0.020437017	1	1	1	0.286899755	1	1	2	TRUE
1884	1901	YGL167C	chrVII	-	TATA-less	TAF1-enriched	6295	190664	190840	-176	YGL167C	5733.1	0.000522903	0.064469243	0.010852832	1	1	1	1	1	1	1	TRUE
1885	1902	YGL166W	chrVII	+	TATA-less	TAF1-enriched	114	191156	191118	-38	YGL166W	756.9	0.075961089	NA	NA	NA	NA	NA	NA	NA	NA	NA	NA
1886	1903	YGL164C	chrVII	-	TATA-less	TAF1-enriched	225	193295	193337	-42	YGL164C	115.4	0.200551475	NA	NA	NA	NA	NA	NA	NA	NA	NA	NA
1887	1904	YGL163C	chrVII	-	TATA-less	TAF1-enriched	197	196502	196530	-28	YGL163C	133.8	0.004687346	0.201420087	0.0350395	0.854266338	0.467860797	0.171844119	0.426068938	0.435902534	0.377019077	1	TRUE
1888	1905	ST4796	chrVII	-	TATA-less	TAF1-enriched	11	197617	197655	-38	ST4796	33.7	0.875104337	NA	NA	NA	NA	NA	NA	NA	NA	NA	NA
1889	1906	YGL162W	chrVII	+	TATA-containing	TAF1-depleted	279	198136	198092	-44	YGL162W	185.2	0.005127048	0.131534306	0.053275164	0.090623991	0.916968139	0.259112318	0.569095049	0.500976703	0.636105649	0	FALSE
1890	1907	YGL161C	chrVII	-	TATA-less	TAF1-enriched	1370	NA	200210	NA	YGL161C	1689.6	0.000232629	0.021680233	0.21635944	0.747116801	0.121687706	0.133982219	0.232853463	0.07686738	0.747116801	1	TRUE
1891	1908	YGL159W	chrVII	+	TATA-less	TAF1-enriched	130	202735	202709	-26	YGL159W	305.7	0.000630282	0.159862268	0.093997049	0.251557329	0.101429155	0.02365882	0.512348204	0.397641398	0.512348204	1	TRUE
1892	1909	YGL157W	chrVII	+	TATA-containing	TAF1-depleted	121	208973	208954	-19	YGL157W	1816.2	0.00089973	0.312095031	0.010902493	1	0.25083368	1	0.013866615	1	1	2	TRUE
1893	1910	YGL154C	chrVII	-	TATA-less	TAF1-enriched	236	216063	216100	-37	YGL154C	280.2	0.00698366	0.056736399	1	0.084821854	0.730339648	0.001692225	0.730339648	0.656340055	0.421259092	1	TRUE
1894	1911	YGL151W	chrVII	+	TATA-less	TAF1-enriched	553	217533	217479	-54	YGL151W	252.9	0.001503297	0.141756911	0.068663221	0.344804114	0.833717008	0.00939477	0.833717008	0.469840078	0.833717008	1	TRUE
1895	1912	YGL150C	chrVII	-	TATA-less	TAF1-enriched	167	225511	225747	-236	YGL150C	1354.9	0.017325951	0.341359034	0.572112346	0.463640356	0.832328018	0.001394429	0.388053398	0.354913625	0.045159453	2	TRUE
1896	1913	YGL148W	chrVII	+	TATA-less	TAF1-enriched	1264	226382	226370	-12	YGL148W	3832.2	0.000190921	0.15096232	0.093836673	0.168647826	0.149270733	0.098902998	0.149270733	0.062637096	0.694095468	0	FALSE
1897	1914	CUT133	chrVII	+	TATA-less	TAF1-enriched	624	228914	228814	-100	CUT133	59.1	0.01634008	1	0.025251572	1	0.19214776	1	0.005296905	0.26995449	1	2	TRUE
1898	1915	YGL146C	chrVII	-	TATA-less	TAF1-enriched	50	229637	229764	-127	YGL146C	53	0.011830085	0.067031483	0.782415213	0.073243581	0.254921379	0.600151412	0.327456764	0.877474586	0.047436398	1	TRUE
1899	1916	YGL145W	chrVII	+	TATA-containing	TAF1-enriched	86	230241	230173	-68	YGL145W	405	0.000136524	1	0.002996232	1	1	1	1	0.000920161	1	2	TRUE
1900	1917	YGL144C	chrVII	-	TATA-less	TAF1-enriched	100	234507	234528	-21	YGL144C	241.7	0.001016689	0.189930914	0.005168529	1	1	1	1	1	1	1	TRUE
1901	1918	YGL143C	chrVII	-	TATA-less	TAF1-enriched	955	235938	235966	-28	YGL143C	261.7	0.000317819	0.064169658	0.507154612	0.025718583	1	0.018476029	1	0.052201662	0.155791851	2	TRUE
1902	1919	YGL140C	chrVII	-	TATA-less	TAF1-enriched	10979	245153	245199	-46	YGL140C	149.9	0.00297118	0.345778586	1	6.23E-06	1	1	1	1	1	1	TRUE
1903	1920	YGL139W	chrVII	+	TATA-less	TAF1-enriched	871	245437	245402	-35	YGL139W	4873.3	0.000139169	0.005230832	1	1	1	1	0.004133317	1	1	2	TRUE
1904	1921	YGL137W	chrVII	+	TATA-less	TAF1-enriched	199	249879	249841	-38	YGL137W	3865.1	0.000140632	0.000425222	1	1	1	1	1	1	1	1	TRUE
1905	1922	YGL136C	chrVII	-	TATA-less	TAF1-enriched	78	253880	253914	-34	YGL136C	503.6	0.00033456	0.018488568	0.545829083	0.289747115	0.246893637	0.023594278	0.074015642	0.152484179	0.055003164	2	TRUE
1906	1923	YGL135W	chrVII	+	TATA-less	TAF1-depleted	73834	254587	254577	-10	YGL135W	42388.4	0.004452014	0.002654029	1	1	1	1	1	1	1	1	TRUE
1907	1924	YGL134W	chrVII	+	TATA-less	TAF1-enriched	643	255737	255573	-164	YGL134W	213.1	0.002920496	0.216423491	0.751576921	0.122594611	0.614507842	0.0716403	0.143903335	0.132854299	0.395089271	0	FALSE
1908	1925	CUT592	chrVII	-	TATA-less	TAF1-enriched	9	257234	257288	-54	CUT592	80.7	0.000349858	0.023061205	1	0.192881907	1	7.64E-05	1	1	0.055511098	2	TRUE
1909	1926	YGL133W	chrVII	+	TATA-less	TAF1-depleted	109	257857	257537	-320	YGL133W	227.2	0.000278264	0.058012269	0.098844015	1	0.390200177	0.004161242	1	1	0.452142714	1	TRUE
1910	1927	YGL131C	chrVII	-	TATA-containing	TAF1-enriched	140	265907	265889	18	YGL131C	395.3	0.000886136	0.14705481	0.123404638	0.80398813	0.20265024	0.091507951	0.20265024	0.100016235	0.191168886	0	FALSE
1911	1928	YGL130W	chrVII	+	TATA-less	TAF1-enriched	1009	266148	266103	-45	YGL130W	676.3	0.000133552	0.003981336	1	0.024246362	1	0.003627349	1	1	0.024246362	4	TRUE
1912	1929	YGL129C	chrVII	-	TATA-containing	TAF1-enriched	412	269099	269146	-47	YGL129C	1783	0.001204054	0.258579674	0.359193878	0.8435959	0.024961363	0.798948593	0.024961363	0.007231044	0.8435959	3	TRUE
1913	1930	CUT134	chrVII	+	TATA-less	TAF1-enriched	12	269368	269252	-116	CUT134	9.9	0.298242673	NA	NA	NA	NA	NA	NA	NA	NA	NA	NA
1914	1931	YGL127C	chrVII	-	TATA-less	TAF1-enriched	3186	270740	270801	-61	YGL127C	696.4	0.002107944	0.403520789	0.21830723	0.01534389	0.39484506	0.00622311	0.596262343	0.45559251	0.064861177	2	TRUE
1915	1932	orphan	chrVII	+	TATA-less	TAF1-enriched	153	271678	271650	-28	orphan	336.6	0.006073348	0.346275939	0.014614223	0.20730717	0.251642971	0.767237022	0.818656291	0.088765166	0.818656291	1	TRUE
1916	1933	ST4814	chrVII	-	TATA-less	TAF1-enriched	191	272862	272881	-19	ST4814	71.1	0.005088152	0.422268586	0.030029596	0.328687094	0.07333664	0.130230676	0.379354856	0.86647901	0.769500338	1	TRUE
1917	1934	CUT593	chrVII	-	TATA-less	TAF1-enriched	41	276865	277037	-172	CUT593	17.5	0.056231224	NA	NA	NA	NA	NA	NA	NA	NA	NA	NA
1918	1935	YGL123W	chrVII	+	TATA-less	TAF1-enriched	132536	277687	277558	-129	YGL123W	70682.6	0.00305754	0.072080516	1	0.33669603	0.052658476	0.222747535	0.01525745	0.449182407	0.01525745	2	TRUE
1919	1936	orphan	chrVII	+	TATA-less	TAF1-depleted	186	278340	278337	-3	orphan	987.8	0.28184144	NA	NA	NA	NA	NA	NA	NA	NA	NA	NA
1920	1937	YGL122C	chrVII	-	TATA-less	TAF1-enriched	3301	280500	280569	-69	YGL122C	2076.9	0.000193811	0.12714488	0.10042411	0.288927376	0.260695425	0.025071616	0.16702254	0.146489184	0.459833678	1	TRUE
1921	1938	CUT135	chrVII	+	TATA-less	TAF1-enriched	1100	280820	280812	-8	CUT135	233	0.000534278	0.094058862	0.073154684	0.398286233	0.658160334	0.102988594	0.149870696	0.167192651	0.398286233	0	FALSE
1922	1939	YGL120C	chrVII	-	TATA-less	TAF1-enriched	3218	283937	283993	-56	YGL120C	3437.5	0.0002089	0.067055589	0.123826606	0.068659601	1	0.018750571	1	0.239904094	0.147120062	1	TRUE
1923	1940	YGL119W	chrVII	+	TATA-less	TAF1-enriched	110	284422	284390	-32	YGL119W	1665.1	0.000455221	0.021228486	0.225291659	0.861597586	0.064121527	0.076988811	0.600958532	0.49953647	0.383369703	1	TRUE
1924	1941	CUT136	chrVII	+	TATA-less	TAF1-enriched	300	NA	286133	NA	CUT136	113	0.005926744	0.013278403	1	0.957303816	0.442862805	0.028619782	0.442862805	0.908291418	0.051752306	2	TRUE
1925	1942	YGL117W	chrVII	+	TATA-containing	TAF1-depleted	121	288446	288430	-16	YGL117W	334.4	0.0069613	0.0041852	0.696651836	0.024433727	0.78007075	0.046234737	0.349154185	0.625756235	0.349154185	3	TRUE
1926	1943	orphan	chrVII	-	TATA-less	TAF1-enriched	5	289186	289382	-196	orphan	61.7	0.230320791	NA	NA	NA	NA	NA	NA	NA	NA	NA	NA
1927	1944	YGL116W	chrVII	+	TATA-less	TAF1-depleted	546	289703	289668	-35	YGL116W	415.2	0.000313734	0.005707839	1	0.231796816	1	0.002019188	1	1	0.016780312	3	TRUE
1928	1945	YGL115W	chrVII	+	TATA-less	TAF1-enriched	807	291966	291940	-26	YGL115W	2019.7	0.001927113	0.382800641	0.009785082	1	0.251275595	1	0.035439228	0.174566289	1	2	TRUE
1929	1946	YGL114W	chrVII	+	TATA-less	TAF1-enriched	65	293257	293218	-39	YGL114W	113.9	0.007343323	0.017239021	1	0.600450878	0.559863045	0.02730761	0.600450878	0.498938284	0.130543019	2	TRUE
1930	1947	YGL113W	chrVII	+	TATA-less	TAF1-enriched	90	295926	295870	-56	YGL113W	435.7	0.00057051	0.104522311	0.181856078	0.373935549	0.035524802	0.251027894	0.150559416	0.084141041	0.373935549	1	TRUE
1931	1948	YGL111W	chrVII	+	TATA-less	TAF1-enriched	374	300005	299951	-54	YGL111W	788.2	0.000479813	0.160355319	0.112514457	0.120044515	0.53625139	0.01157349	0.558507683	0.450063829	0.0504922	1	TRUE
1932	1949	YGL110C	chrVII	-	TATA-containing	TAF1-depleted	284	303373	303432	-59	YGL110C	388.1	0.00017677	0.301917453	0.101091843	0.121955184	0.167489451	0.045860354	0.167489451	0.0747525	0.121955184	1	TRUE
1933	1950	YGL108C	chrVII	-	TATA-containing	TAF1-enriched	435	304068	304106	-38	YGL108C	393.9	0.000542279	0.146027985	0.197449453	0.576721516	0.264268117	0.051190623	0.076221719	0.235273987	0.056860891	0	FALSE
1934	1951	YGL107C	chrVII	-	TATA-less	TAF1-enriched	193	NA	306274	NA	YGL107C	451.4	0.003381897	0.093290977	0.040243547	0.307077621	0.307077621	0.826054539	0.307077621	0.379369745	0.307077621	1	TRUE
1935	1952	YGL106W	chrVII	+	TATA-less	TAF1-enriched	23357	306578	306531	-47	YGL106W	2083.2	0.007374589	0.176922434	0.14073877	0.919667526	0.297345472	0.409598517	0.189829759	0.09053149	0.297345472	0	FALSE
1936	1953	orphan	chrVII	-	TATA-containing	TAF1-depleted	28	306959	306988	-29	orphan	19.9	0.039964965	0.777616694	0.076913876	0.046971068	0.695945901	0.096771906	0.415550812	0.784637045	0.26818002	1	TRUE
1937	1954	YGL105W	chrVII	+	TATA-less	TAF1-enriched	3569	307476	307414	-62	YGL105W	7265.4	0.000257425	0.006446133	0.675139657	0.055755449	1	0.002196423	1	1	1	2	TRUE
1938	1955	YGL103W	chrVII	+	TATA-less	TAF1-enriched	255466	310989	310951	-38	YGL103W	22766	0.000144385	0.017174376	1	0.044037586	1	7.89E-05	1	1	0.062242055	3	TRUE
1939	1956	YGL101W	chrVII	+	TATA-containing	TAF1-enriched	508	312209	312181	-28	YGL101W	750	0.001443212	1	0.004483369	0.113586231	0.416492806	0.041081006	0.416492806	0.782515736	0.113586231	2	TRUE
1940	1957	YGL100W	chrVII	+	TATA-less	TAF1-enriched	154	313248	313197	-51	YGL100W	919.1	0.00034421	1	0.003433682	0.084364202	0.348799313	0.025871451	0.172476896	0.782652179	0.230171935	2	TRUE
1941	1958	CUT595	chrVII	-	TATA-less	TAF1-enriched	406	314204	314359	-155	CUT595	67.4	0.000974149	0.015784798	0.393282333	0.163113078	0.827689007	0.040334743	0.424806478	0.512029345	0.283626258	2	TRUE
1942	1959	YGL099W	chrVII	+	TATA-less	TAF1-enriched	8233	314644	314597	-47	YGL099W	651.3	0.000708348	0.048877456	0.263942989	0.100508606	0.350350481	0.004401139	0.675472549	0.454250113	0.138506943	2	TRUE
1943	1960	orphan	chrVII	+	TATA-less	TAF1-enriched	13494	316840	316788	-52	orphan	11954	0.000240578	0.17732996	0.158439022	0.094741778	0.176428984	0.030996287	0.176428984	0.080948681	0.573731994	1	TRUE
1944	1961	YGL098W	chrVII	+	TATA-containing	TAF1-enriched	94	317357	317271	-86	YGL098W	261.2	0.00137539	0.067653042	0.448651268	0.282781004	0.69610825	0.013965526	0.672202207	0.120011184	0.182046867	1	TRUE
1945	1962	ST1139	chrVII	+	TATA-less	TAF1-enriched	171	320081	320017	-64	ST1139	1657	0.020751342	0.477845264	0.00550324	0.04887172	0.18913598	0.592412077	0.18913598	0.89353228	0.18913598	2	TRUE
1946	1963	YGL097W	chrVII	+	TATA-less	TAF1-enriched	246	321786	321739	-47	YGL097W	815.7	0.002302299	0.219738886	0.125022661	0.539636981	0.204535532	0.011490988	0.204535532	0.853697534	0.539636981	1	TRUE
1947	1964	orphan	chrVII	-	TATA-less	TAF1-depleted	439	323205	323224	-19	orphan	14.3	0.202898918	NA	NA	NA	NA	NA	NA	NA	NA	NA	NA
1948	1965	ST4827	chrVII	-	TATA-less	TAF1-enriched	116	324192	324222	-30	ST4827	38.7	0.254530623	NA	NA	NA	NA	NA	NA	NA	NA	NA	NA
1949	1966	orphan	chrVII	+	TATA-less	TAF1-enriched	105	325007	324955	-52	orphan	19.8	0.443246184	NA	NA	NA	NA	NA	NA	NA	NA	NA	NA
1950	1967	orphan	chrVII	-	TATA-less	TAF1-enriched	2	NA	326476	NA	orphan	15.6	0.878880879	NA	NA	NA	NA	NA	NA	NA	NA	NA	NA
1951	1968	YGL095C	chrVII	-	TATA-less	TAF1-enriched	243	330646	330657	-11	YGL095C	799.1	0.000242225	0.020437017	0.030108244	0.286899755	1	1	1	1	1	2	TRUE
1952	1969	YGL094C	chrVII	-	TATA-containing	TAF1-enriched	680	334596	334644	-48	YGL094C	447.7	0.001130137	0.096062944	0.245303191	0.064473632	0.29017521	0.003034652	0.856689955	0.885244131	0.021672224	2	TRUE
1953	1970	YGL093W	chrVII	+	TATA-less	TAF1-enriched	552	334874	334848	-26	YGL093W	320.6	0.001071046	0.011975074	0.300802276	0.948357223	0.673751997	0.194950637	0.948357223	0.059918204	0.948357223	1	TRUE
1954	1971	CUT596	chrVII	-	TATA-less	TAF1-enriched	142	337578	337595	-17	CUT596	26	0.004169222	0.009689942	1	0.020346391	0.353428717	0.042122805	0.765495107	0.622696936	0.465933873	3	TRUE
1955	1972	YGL092W	chrVII	+	TATA-less	TAF1-enriched	2924	NA	337823	NA	YGL092W	437.9	0.001783199	0.116469032	0.031839657	0.219341077	1	0.043788353	1	0.634279839	0.399647694	2	TRUE
1956	1973	orphan	chrVII	-	TATA-less	TAF1-enriched	20	345710	345742	-32	orphan	5.5	0.444544656	NA	NA	NA	NA	NA	NA	NA	NA	NA	NA
1957	1974	YGL088W	chrVII	+	TATA-containing	TAF1-depleted	43607	346020	345986	-34	YGL088W	827332.2	NA	NA	NA	NA	NA	NA	NA	NA	NA	NA	NA
1958	1975	CUT137	chrVII	+	TATA-less	TAF1-enriched	4	346565	346531	-34	CUT137	17.9	0.262238124	NA	NA	NA	NA	NA	NA	NA	NA	NA	NA
1959	1976	YGL087C	chrVII	-	TATA-less	TAF1-enriched	887	346939	346947	-8	YGL087C	1586	0.000497149	0.097656462	0.085427435	0.813801688	0.813801688	0.057015069	0.813801688	0.033301821	0.813801688	1	TRUE
1960	1977	YGL086W	chrVII	+	TATA-less	TAF1-enriched	197	347209	347187	-22	YGL086W	407	0.000801995	0.133165607	0.14939678	0.028080072	0.686917564	0.047063483	0.303871021	0.302995796	0.378798953	2	TRUE
1961	1978	YGL085W	chrVII	+	TATA-containing	TAF1-enriched	112	349635	349573	-62	YGL085W	113.5	0.001036104	0.05828418	0.700512869	0.045353517	0.311139248	0.006329728	0.19205268	0.842458566	0.209146897	2	TRUE
1962	1979	YGL084C	chrVII	-	TATA-less	TAF1-enriched	1834	352290	352344	-54	YGL084C	381.1	0.00029304	0.213378273	0.052311467	0.076930966	0.306628948	0.022401974	0.262848011	0.489358495	0.322239392	1	TRUE
1963	1980	YGL083W	chrVII	+	TATA-less	TAF1-enriched	244	353038	352990	-48	YGL083W	586.4	0.005980872	0.347041809	0.06001473	0.232794191	0.870441128	0.052457779	0.870441128	0.272587871	0.232794191	0	FALSE
1964	1981	ST4836	chrVII	-	TATA-less	TAF1-enriched	212	355508	355538	-30	ST4836	95.3	0.001132857	0.003665847	1	0.125616854	1	1	0.165128413	1	1	1	TRUE
1965	1982	YGL082W	chrVII	+	TATA-less	TAF1-depleted	126	355779	355748	-31	YGL082W	483.3	0.000196308	0.02155837	0.186891181	0.117613522	1	0.010857365	0.395062427	1	0.196108525	2	TRUE
1966	1983	YGL080W	chrVII	+	TATA-less	TAF1-depleted	2508	358604	358564	-40	YGL080W	3077.9	0.000320885	0.020435822	0.240476473	0.082586773	0.351219413	0.01702123	0.520279307	0.966897309	0.017369794	3	TRUE
1967	1984	YGL079W	chrVII	+	TATA-less	TAF1-enriched	697	359469	359434	-35	YGL079W	283.6	0.00189572	0.337366862	0.254592686	0.09887778	0.132960565	0.03312605	0.132960565	0.378978356	0.221189775	1	TRUE
1968	1985	YGL078C	chrVII	-	TATA-less	TAF1-enriched	750	361877	361924	-47	YGL078C	17960.3	0.000232441	0.074289444	0.123891319	0.050561875	0.589638552	0.011598634	1	0.408311392	0.251737326	1	TRUE
1969	1986	ST1158	chrVII	+	TATA-less	TAF1-depleted	28	362277	362155	-122	ST1158	46.9	0.204024741	NA	NA	NA	NA	NA	NA	NA	NA	NA	NA
1970	1987	YGL077C	chrVII	-	TATA-containing	TAF1-depleted	701	NA	364040	NA	YGL077C	1500.2	0.063205994	NA	NA	NA	NA	NA	NA	NA	NA	NA	NA
1971	1988	YGL076C	chrVII	-	TATA-less	TAF1-enriched	79800	NA	366022	NA	YGL076C	125526.6	0.001226023	0.001927957	1	1	1	0.055511098	1	1	1	1	TRUE
1972	1989	orphan	chrVII	-	TATA-less	TAF1-enriched	1148	366449	366468	-19	orphan	500.5	0.00038835	0.150206544	0.80290586	0.086743081	0.07822438	0.045109792	0.043548575	0.137661929	0.086743081	2	TRUE
1973	1990	CUT140	chrVII	+	TATA-less	TAF1-depleted	0	366748	366701	-47	CUT140	9.7	0.305932926	NA	NA	NA	NA	NA	NA	NA	NA	NA	NA
1974	1991	YGL075C	chrVII	-	TATA-less	TAF1-enriched	112	368236	368298	-62	YGL075C	48.2	0.020066093	0.034270933	0.972763076	0.587593452	0.587593452	0.483839388	0.587593452	0.01049329	0.587593452	2	TRUE
1975	1992	YGL073W	chrVII	+	TATA-less	TAF1-enriched	93	368739	368669	-70	YGL073W	259.7	0.0056979	0.333571479	0.100823047	0.450666751	0.032800271	0.481150938	0.119528691	0.14127412	0.53137282	1	TRUE
1976	1993	YGL072C	chrVII	-	TATA-less	TAF1-enriched	649	371195	371222	-27	YGL072C	349	0.000515692	0.221431012	0.02884246	0.731425161	0.162102292	0.190971539	0.162102292	0.07109713	0.731425161	1	TRUE
1977	1994	YGL071W	chrVII	+	TATA-less	TAF1-depleted	1233	NA	371564	NA	YGL071W	86.3	0.040262823	0.459428978	0.155493621	0.189236059	0.189236059	0.346399675	0.8584974	0.258512113	0.189236059	0	FALSE
1978	1995	YGL070C	chrVII	-	TATA-less	TAF1-enriched	603	374828	374852	-24	YGL070C	1005	0.000174675	0.02492739	0.109198879	0.07931256	1	0.023494678	0.482756807	1	1	2	TRUE
1979	1996	YGL068W	chrVII	+	TATA-less	TAF1-depleted	8445	375082	375040	-42	YGL068W	1294	0.000629748	0.071300996	0.319704565	0.423422551	0.085392776	0.301398989	0.023498085	0.129222536	0.423422551	1	TRUE
1980	1997	YGL067W	chrVII	+	TATA-less	TAF1-enriched	313	376081	375929	-152	YGL067W	371.6	0.015671451	0.011790281	0.188401817	0.527011955	0.012590301	0.617734654	0.029341658	0.467893616	0.832998112	3	TRUE
1981	1998	YGL066W	chrVII	+	TATA-less	TAF1-enriched	242	377656	377507	-149	YGL066W	520.1	0.000249762	0.099226463	0.059547147	0.175584655	0.897359479	0.080356617	0.302080784	0.182767412	0.175584655	0	FALSE
1982	1999	YGL065C	chrVII	-	TATA-less	TAF1-enriched	149	381251	381316	-65	YGL065C	1025.1	0.000230011	0.027357635	0.141313348	0.440928415	1	0.006220906	1	1	0.086089746	2	TRUE
1983	2000	YGL064C	chrVII	-	TATA-less	TAF1-enriched	215	383200	383215	-15	YGL064C	56	0.001008591	0.012759126	0.649500158	0.010806276	1	0.01358842	1	1	1	3	TRUE
1984	2001	YGL063W	chrVII	+	TATA-less	TAF1-enriched	195	383635	383460	-175	YGL063W	163.6	0.02526338	0.036735084	0.00073157	0.909561837	0.167795458	0.413913697	0.407900878	0.690602028	0.167795458	2	TRUE
1985	2002	orphan	chrVII	+	TATA-less	TAF1-enriched	224	392221	392200	-21	orphan	705.5	0.00023597	0.126049643	0.494254558	0.05416867	1	0.000110279	0.453977851	1	0.07460962	1	TRUE
1986	2003	orphan	chrVII	-	TATA-less	TAF1-enriched	88	393662	393681	-19	orphan	19.7	0.002530256	0.057488627	0.280605628	0.20580803	0.617489298	0.008743235	0.920437719	0.796487827	0.20580803	1	TRUE
1987	2004	YGL058W	chrVII	+	TATA-less	TAF1-enriched	744	393987	393918	-69	YGL058W	1189.4	0.000728384	0.105058263	0.14966365	0.036809821	0.401786532	0.007029893	0.587462635	0.361440236	0.036809821	3	TRUE
1988	2005	YGL057C	chrVII	-	TATA-less	TAF1-enriched	496	395789	395802	-13	YGL057C	177.3	0.130765468	NA	NA	NA	NA	NA	NA	NA	NA	NA	NA
1989	2006	YGL056C	chrVII	-	TATA-less	TAF1-depleted	7452	397658	397713	-55	YGL056C	1242.5	0.003255085	0.057529404	0.311087722	0.165433113	0.298213885	0.073350133	1	0.263074573	0.165433113	0	FALSE
1990	2007	YGL055W	chrVII	+	TATA-containing	TAF1-depleted	16505	398668	398566	-102	YGL055W	47330.2	0.001991464	0.002399046	1	1	1	0.092473243	1	1	0.150413352	1	TRUE
1991	2008	tE(UUC)G2	chrVII	+	TATA-less	-	0	NA	401640	NA	tE(UUC)G2	0	NA	NA	NA	NA	NA	NA	NA	NA	NA	NA	NA
1992	2009	YGL050W	chrVII	+	TATA-less	TAF1-enriched	426	405785	405746	-39	YGL050W	516.7	0.000591567	0.072366677	0.082229707	0.276145604	0.194027772	0.159748713	0.379248485	0.159748713	0.802532458	0	FALSE
1993	2010	YGL049C	chrVII	-	TATA-less	TAF1-enriched	1866	409719	409740	-21	YGL049C	2661.7	0.000791049	0.085859964	0.356297462	0.086146715	0.316452382	0.026728878	0.316452382	0.195912273	0.316452382	1	TRUE
1994	2011	YGL048C	chrVII	-	TATA-less	TAF1-enriched	4413	411271	411314	-43	YGL048C	4191.9	0.000480583	1	0.009861068	0.31741511	0.427817419	0.19680237	0.067671023	0.018329504	0.31741511	2	TRUE
1995	2012	orphan	chrVII	-	TATA-less	TAF1-enriched	14	412070	412105	-35	orphan	30.6	0.013885847	0.110171384	0.197167747	0.311823085	0.961587057	0.146836485	0.327433756	0.45559251	0.531244586	0	FALSE
1996	2013	orphan	chrVII	-	TATA-less	TAF1-enriched	136	413507	413595	-88	orphan	4	0.052089554	NA	NA	NA	NA	NA	NA	NA	NA	NA	NA
1997	2014	YGL044C	chrVII	-	TATA-less	TAF1-enriched	89	417224	417242	-18	YGL044C	724.8	0.001123551	1	0.026260634	0.361285931	0.033159987	0.694424997	0.008132022	0.005959526	0.760894901	4	TRUE
1998	2015	YGL043W	chrVII	+	TATA-less	TAF1-enriched	576	417493	417461	-32	YGL043W	1175.7	0.000146007	1	0.004234452	1	0.052433321	1	0.011201592	0.003862426	1	3	TRUE
1999	2016	YGL041W-A	chrVII	+	TATA-less	TAF1-enriched	907	418848	418809	-39	YGL041W-A	1204.6	0.00817101	0.50357465	0.034597366	0.346768912	0.500036364	0.030726423	0.874299027	0.484739049	0.094210842	2	TRUE
[truncated: 3,980 more rows]
