# Supplementary material for: Ssl2/TFIIH function in transcription start site scanning by RNA polymerase II in Saccharomyces cerevisiae
Source: eLife. 2021 Oct 15;10:e71013. doi: 10.7554/eLife.71013 (PMC8589449; doi:10.7554/eLife.71013)
Supplement: Figure 5—figure supplement 2—source data 6. [file elife-71013-fig5-figsupp2-data6.csv]

	wider	narrower
L225P	2194	-1222
N230D	1506	-2485
N230I	2822	-887
D522V	1487	-2374
R636C	1947	-1214
Y750	1250	-2377
E1103G	2425	-1741
H1085Y	2272	-1789
