# Supplementary material for: Ssl2/TFIIH function in transcription start site scanning by RNA polymerase II in Saccharomyces cerevisiae
Source: eLife. 2021 Oct 15;10:e71013. doi: 10.7554/eLife.71013 (PMC8589449; doi:10.7554/eLife.71013)
Supplement: Figure 5—figure supplement 2—source data 7. [file elife-71013-fig5-figsupp2-data7.csv]

X5979_Index	X6044_Index	Gene	Chromosome	Strand	TATA_class	TAF1_status	WT_TSS_Expression_Total_reads	WT_Plus_one_nuc_position	WT_TSS_median	TSS_Plusone_nuc_distance	gene	rowtotal	KruskalWallis p-values	rpb1E1103G - RPB1WT	rpb1H1085Y - RPB1WT	ssl2D522V - SSL2WT	ssl2L225P - SSL2WT	ssl2N230D - SSL2WT	ssl2N230I - SSL2WT	ssl2R636C - SSL2WT	SSL2WT - ssl2Y750	Number_of_muts_Shifted	DT_Shifted
1	1	ST3634	chrI	-	TATA-less	TAF1-enriched	0	6112	6276	-164	ST3634	12.9	0.709309113	NA	NA	NA	NA	NA	NA	NA	NA	NA	NA
2	2	ST3637	chrI	-	TATA-less	TAF1-enriched	20	29717	29744	-27	ST3637	85.7	0.08013073	NA	NA	NA	NA	NA	NA	NA	NA	NA	NA
3	3	CUT001	chrI	+	TATA-less	TAF1-depleted	33	30217	30203	-14	CUT001	213.1	0.40594324	NA	NA	NA	NA	NA	NA	NA	NA	NA	NA
4	4	CUT437	chrI	-	TATA-less	TAF1-enriched	97	30710	30844	-134	CUT437	36.3	0.072463563	NA	NA	NA	NA	NA	NA	NA	NA	NA	NA
5	5	orphan	chrI	-	TATA-less	TAF1-enriched	88	33064	33141	-77	orphan	6.8	0.731370465	NA	NA	NA	NA	NA	NA	NA	NA	NA	NA
6	6	ST3640	chrI	-	TATA-less	TAF1-enriched	314	34347	34362	-15	ST3640	179.9	0.189488284	NA	NA	NA	NA	NA	NA	NA	NA	NA	NA
7	7	orphan	chrI	+	TATA-less	TAF1-enriched	55	NA	34678	NA	orphan	26.1	0.358428935	NA	NA	NA	NA	NA	NA	NA	NA	NA	NA
8	8	CUT438	chrI	-	TATA-less	TAF1-enriched	436	NA	34738	NA	CUT438	76.2	0.59960007	NA	NA	NA	NA	NA	NA	NA	NA	NA	NA
9	9	YAL060W	chrI	+	TATA-containing	TAF1-depleted	198	35243	35071	-172	YAL060W	713.1	0.008926181	0.008241855	0.383760519	0.817641898	0.450042041	0.007847624	0.638991753	0.734809395	0.096561133	2	TRUE
10	10	CUT439	chrI	-	TATA-containing	TAF1-enriched	32	36322	36357	-35	CUT439	22.5	0.065086984	NA	NA	NA	NA	NA	NA	NA	NA	NA	NA
11	11	YAL058W	chrI	+	TATA-less	TAF1-enriched	12	37444	37405	-39	YAL058W	447.2	0.04123547	0.251506387	0.126281577	0.815362208	0.717090877	0.715979293	0.044962991	0.94199112	0.306482446	1	TRUE
12	12	YAL056W	chrI	+	TATA-less	TAF1-enriched	844	39267	39217	-50	YAL056W	582.3	0.846414767	NA	NA	NA	NA	NA	NA	NA	NA	NA	NA
13	13	ST0010	chrI	+	TATA-less	TAF1-enriched	102	43637	43542	-95	ST0010	100.4	0.024370811	0.472605801	0.096724856	0.566165806	0.144604742	0.059649564	0.934679951	0.397295799	0.611354563	0	FALSE
14	14	YAL053W	chrI	+	TATA-less	TAF1-depleted	6373	45816	45757	-59	YAL053W	1436.1	0.109981094	NA	NA	NA	NA	NA	NA	NA	NA	NA	NA
15	15	YAL051W	chrI	+	TATA-less	TAF1-enriched	252	48564	48539	-25	YAL051W	384.8	0.023601182	0.449813665	0.49456907	0.610436928	0.079905623	0.388012532	0.873508874	0.016185548	0.323613655	1	TRUE
16	16	YAL049C	chrI	-	TATA-less	TAF1-enriched	1760	52586	52661	-75	YAL049C	1263.6	0.000680427	0.148516829	0.559386093	0.019592285	0.117184457	0.000280765	0.725056868	0.482854152	0.001109037	3	TRUE
17	17	YAL047C	chrI	-	TATA-containing	TAF1-enriched	70	56830	56883	-53	YAL047C	134.5	0.003730916	0.11095133	0.026048391	0.494227275	0.836866012	0.024862849	0.836866012	0.450290448	0.603846015	2	TRUE
18	18	YAL046C	chrI	-	TATA-containing	TAF1-enriched	258	57361	57383	-22	YAL046C	1270.6	0.006603149	0.09187465	0.09187465	0.27205929	0.454375968	0.20263076	0.381311432	0.537567078	0.577441876	0	FALSE
19	19	YAL044C	chrI	-	TATA-containing	TAF1-depleted	29392	58446	58476	-30	YAL044C	3091	0.005875417	0.013800355	0.349739024	0.174699135	0.343373879	0.868705409	0.489293157	0.372051699	0.013626313	2	TRUE
20	20	YAL043C	chrI	-	TATA-less	TAF1-enriched	341	61024	61072	-48	YAL043C	287.7	0.00199167	0.183791133	0.792617481	0.074416638	0.115016998	0.006601244	0.077053738	0.812231114	0.349261505	1	TRUE
21	21	YAL042W	chrI	+	TATA-less	TAF1-enriched	1335	61330	61296	-34	YAL042W	6701.1	0.000752426	0.46595861	0.028727113	0.033192184	0.505700591	0.005968688	0.505700591	0.390220427	0.505700591	3	TRUE
22	22	YAL041W	chrI	+	TATA-less	TAF1-enriched	9254	62807	62795	-12	YAL041W	154.2	0.276127277	NA	NA	NA	NA	NA	NA	NA	NA	NA	NA
23	24	YAL040C	chrI	-	TATA-containing	TAF1-depleted	10607	67822	67848	-26	YAL040C	1762.9	0.012769274	0.080707841	0.012894285	0.506184934	0.758026533	0.785526009	0.0222409	0.438629706	0.249641164	2	TRUE
24	25	YAL039C	chrI	-	TATA-less	TAF1-enriched	466	69536	69581	-45	YAL039C	470.8	0.302823858	NA	NA	NA	NA	NA	NA	NA	NA	NA	NA
25	26	YAL038W	chrI	+	TATA-less	TAF1-depleted	270773	71853	71759	-94	YAL038W	99353.4	0.000939636	0.002654029	0.033894854	0.272490483	0.155580348	0.066753015	0.000623603	0.004040275	0.605576616	4	TRUE
26	27	YAL036C	chrI	-	TATA-less	TAF1-enriched	536	76158	76187	-29	YAL036C	1463.4	0.001232058	0.026069978	0.197657205	0.105299473	0.936092078	0.384558522	0.153508084	0.237971019	0.596663421	1	TRUE
27	28	YAL035W	chrI	+	TATA-less	TAF1-enriched	1787	76445	76401	-44	YAL035W	10290.1	0.000211754	0.029502579	0.119996248	0.109377981	0.864759554	0.058628137	0.864759554	0.825964288	0.142991786	1	TRUE
28	29	YAL034W-A	chrI	+	TATA-less	TAF1-enriched	151	79731	79689	-42	YAL034W-A	78.3	0.048263884	0.353231794	0.24284297	0.083550694	0.724350811	0.109879224	0.155956935	0.726794524	0.297621371	0	FALSE
29	30	YAL032C	chrI	-	TATA-less	TAF1-enriched	427	84456	84494	-38	YAL032C	84.9	0.334027982	NA	NA	NA	NA	NA	NA	NA	NA	NA	NA
30	31	YAL031C	chrI	-	TATA-less	TAF1-depleted	30	87027	87078	-51	YAL031C	416.6	0.000204731	0.109770406	0.036501585	0.105855517	0.479265975	0.036827235	0.225195167	1	0.566831007	2	TRUE
31	32	YAL029C	chrI	-	TATA-less	TAF1-enriched	526	92441	92486	-45	YAL029C	277.9	0.035004447	0.213305207	0.260164777	0.119216345	0.948237985	0.078402935	0.649513992	0.899956468	0.603511739	0	FALSE
32	33	YAL028W	chrI	+	TATA-less	TAF1-enriched	40	92902	92885	-17	YAL028W	362.4	0.226111464	NA	NA	NA	NA	NA	NA	NA	NA	NA	NA
33	34	YAL027W	chrI	+	TATA-containing	TAF1-enriched	55	94664	94625	-39	YAL027W	190.3	0.135517263	NA	NA	NA	NA	NA	NA	NA	NA	NA	NA
34	35	YAL026C	chrI	-	TATA-less	TAF1-enriched	2957	99727	99778	-51	YAL026C	757.7	0.071768579	NA	NA	NA	NA	NA	NA	NA	NA	NA	NA
35	36	YAL025C	chrI	-	TATA-less	TAF1-enriched	246	101137	101170	-33	YAL025C	234	0.004294435	0.076026901	0.375019899	0.84589716	0.27074413	0.107393103	0.016527352	0.315547376	0.456252837	1	TRUE
36	37	YAL024C	chrI	-	TATA-less	TAF1-enriched	1199	105930	105969	-39	YAL024C	184.4	0.010938989	0.803807469	0.015901858	0.476248738	0.062193535	0.050826683	0.094362859	0.748723093	0.272843796	1	TRUE
37	38	YAL023C	chrI	-	TATA-less	TAF1-enriched	16797	108595	108632	-37	YAL023C	5979.2	0.000186089	0.10670848	0.16938633	0.057691667	0.35951374	0.000983169	0.265862929	0.865804738	0.169305726	1	TRUE
38	39	YAL022C	chrI	-	TATA-less	TAF1-enriched	1901	110405	110446	-41	YAL022C	2351.3	0.079351254	NA	NA	NA	NA	NA	NA	NA	NA	NA	NA
39	40	YAL021C	chrI	-	TATA-less	TAF1-enriched	11944	113357	113406	-49	YAL021C	3308.8	0.000338747	0.059480093	0.003371737	0.213036986	0.158803365	0.687753765	0.008751925	0.002318934	1	3	TRUE
40	41	YAL020C	chrI	-	TATA-less	TAF1-depleted	452	114589	114619	-30	YAL020C	673.8	0.038484838	0.576970381	0.054480613	0.412158065	0.987170228	0.092658231	0.342750197	0.442421543	0.412158065	0	FALSE
41	42	YAL019W	chrI	+	TATA-less	TAF1-enriched	1693	114841	114803	-38	YAL019W	219.5	0.000902995	0.485197008	0.031391922	0.094419495	0.220001794	0.041765943	0.107656507	0.446733952	0.271727786	2	TRUE
42	43	YAL014C	chrI	-	TATA-less	TAF1-enriched	493	129003	129067	-64	YAL014C	1437.8	0.000828769	0.422231318	0.2463552	0.041842437	0.406361156	0.008606998	0.406361156	0.101125	0.166402241	2	TRUE
43	44	YAL013W	chrI	+	TATA-less	TAF1-enriched	151	129291	129236	-55	YAL013W	201.1	0.009641833	0.63138423	0.015802903	0.95554695	0.854677268	0.019613257	0.439858815	0.673390735	0.842199914	2	TRUE
44	45	YAL012W	chrI	+	TATA-less	TAF1-depleted	52312	130828	130735	-93	YAL012W	13165.8	0.00563974	0.029060718	0.268777586	0.031406202	0.936476222	0.635997968	0.885927549	0.71107702	0.380652334	2	TRUE
45	46	YAL011W	chrI	+	TATA-less	TAF1-enriched	313	131983	131969	-14	YAL011W	250	0.367704629	NA	NA	NA	NA	NA	NA	NA	NA	NA	NA
46	47	YAL010C	chrI	-	TATA-less	TAF1-enriched	354	135652	135688	-36	YAL010C	487.7	0.098396162	NA	NA	NA	NA	NA	NA	NA	NA	NA	NA
47	48	YAL008W	chrI	+	TATA-less	TAF1-enriched	233	136925	136866	-59	YAL008W	452.2	0.006552682	0.154025108	0.071287821	0.153847289	0.529097594	0.571606951	0.083842268	0.643483097	0.804928713	0	FALSE
48	49	YAL007C	chrI	-	TATA-less	TAF1-enriched	1258	138389	138430	-41	YAL007C	1915.5	0.082034351	NA	NA	NA	NA	NA	NA	NA	NA	NA	NA
49	50	tP(UGG)A	chrI	-	TATA-containing	-	3	139260	139314	-54	tP(UGG)A	47.4	0.123726105	NA	NA	NA	NA	NA	NA	NA	NA	NA	NA
50	51	YAL005C	chrI	-	TATA-containing	TAF1-depleted	794	141409	141493	-84	YAL005C	12345.5	0.000945261	0.23092522	0.790071675	0.274130388	0.165983115	0.908414892	0.056952614	0.245707215	0.005460137	1	TRUE
51	52	YAL003W	chrI	+	TATA-less	TAF1-depleted	117436	142199	142153	-46	YAL003W	50356.6	0.000274102	0.01029225	0.472083931	0.053173383	1	0.012554919	1	1	0.019945403	3	TRUE
52	53	YAL002W	chrI	+	TATA-less	TAF1-enriched	895	143680	143630	-50	YAL002W	296.3	0.121438705	NA	NA	NA	NA	NA	NA	NA	NA	NA	NA
53	54	orphan	chrI	-	TATA-less	TAF1-enriched	94	151145	151192	-47	orphan	655.7	0.027033881	0.008545612	0.275389662	0.136366804	0.064378904	0.262747729	0.064378904	0.290726791	0.523252936	1	TRUE
54	55	CUT441	chrI	-	TATA-less	TAF1-enriched	9	151837	151964	-127	CUT441	86.7	0.018538402	0.224271466	0.725290494	0.075021995	0.127582238	0.115562256	0.153443982	0.868432272	0.2825478	0	FALSE
55	56	YAR002W	chrI	+	TATA-less	TAF1-enriched	5329	152259	152215	-44	YAR002W	200.1	0.25405794	NA	NA	NA	NA	NA	NA	NA	NA	NA	NA
56	57	YAR002C-A	chrI	-	TATA-less	TAF1-enriched	1138	154726	154740	-14	YAR002C-A	1047.9	0.076052004	NA	NA	NA	NA	NA	NA	NA	NA	NA	NA
57	58	YAR003W	chrI	+	TATA-containing	TAF1-enriched	76	154989	154955	-34	YAR003W	121.5	0.008018268	0.636472214	0.027756149	0.839724999	0.076449619	0.363551123	0.042301444	0.291501305	0.296677208	2	TRUE
58	59	YAR007C	chrI	-	TATA-less	TAF1-enriched	492	158638	158678	-40	YAR007C	357.9	0.004105171	0.446229144	0.446229144	0.352009878	0.148686569	0.051498733	0.148686569	0.10612783	0.067354277	0	FALSE
59	60	tA(UGC)A	chrI	+	TATA-less	-	704	166463	166366	-97	tA(UGC)A	11.8	0.211641799	NA	NA	NA	NA	NA	NA	NA	NA	NA	NA
60	61	YAR014C	chrI	-	TATA-less	TAF1-enriched	89	168977	168980	-3	YAR014C	602.6	0.002320679	0.953710315	0.031731262	0.115530098	0.454963993	0.048813411	0.691051746	0.233912808	0.05441072	2	TRUE
61	62	YAR015W	chrI	+	TATA-containing	TAF1-depleted	973	169311	169286	-25	YAR015W	5662.8	0.000739093	0.010575311	0.735633465	0.028963716	0.459460703	0.004809762	1	0.480887082	0.00119218	4	TRUE
62	63	YAR018C	chrI	-	TATA-less	TAF1-enriched	306	171693	171711	-18	YAR018C	378.3	0.024831703	0.338744498	0.402554465	0.103261236	0.902259625	0.035435551	0.902259625	0.368964853	0.103261236	1	TRUE
63	64	YAR019C	chrI	-	TATA-less	TAF1-enriched	719	175121	175164	-43	YAR019C	168.3	0.053670913	NA	NA	NA	NA	NA	NA	NA	NA	NA	NA
64	65	tL(CAA)A	chrI	+	TATA-less	-	0	181136	181100	-36	tL(CAA)A	1	0.249978121	NA	NA	NA	NA	NA	NA	NA	NA	NA	NA
65	66	orphan	chrI	+	TATA-less	TAF1-enriched	127	181571	181446	-125	orphan	30.5	0.034192868	0.089574422	0.168070178	0.830096076	0.096714378	0.107219649	0.422158576	0.178929838	0.93033703	0	FALSE
66	67	tS(AGA)A	chrI	-	TATA-less	-	36	182406	182506	-100	tS(AGA)A	17	0.079526695	NA	NA	NA	NA	NA	NA	NA	NA	NA	NA
67	68	orphan	chrI	+	TATA-less	TAF1-enriched	1	184719	184634	-85	orphan	17.1	0.088259664	NA	NA	NA	NA	NA	NA	NA	NA	NA	NA
68	69	YAR028W	chrI	+	TATA-less	TAF1-enriched	3102	184885	184869	-16	YAR028W	998.9	0.251668713	NA	NA	NA	NA	NA	NA	NA	NA	NA	NA
69	70	YAR033W	chrI	+	TATA-less	TAF1-enriched	483	NA	188045	NA	YAR033W	104.7	0.030261743	0.05881771	0.964115784	0.296871911	0.67528282	0.080174277	0.095430698	0.356238469	0.296871911	0	FALSE
70	71	YAR042W	chrI	+	TATA-less	TAF1-enriched	1288	192634	192595	-39	YAR042W	362.8	0.002785357	0.894951237	0.083413499	0.80327567	0.054787456	0.241083591	0.154928175	0.107835543	0.141412106	0	FALSE
71	72	ST0047	chrI	+	TATA-less	TAF1-enriched	63	198972	198923	-49	ST0047	25.5	0.627966666	NA	NA	NA	NA	NA	NA	NA	NA	NA	NA
72	73	orphan	chrI	+	TATA-less	TAF1-enriched	563	200666	200620	-46	orphan	219.7	0.002994116	0.211072154	0.432292504	0.019608314	0.615809525	0.002258106	0.468562753	0.071940235	0.539672154	2	TRUE
73	74	orphan	chrI	+	TATA-containing	TAF1-enriched	0	NA	223048	NA	orphan	0.3	0.415880187	NA	NA	NA	NA	NA	NA	NA	NA	NA	NA
74	75	YAR073W	chrI	+	TATA-containing	TAF1-depleted	85	227528	227496	-32	YAR073W	9.1	0.117680681	NA	NA	NA	NA	NA	NA	NA	NA	NA	NA
75	76	tL(UAA)B1	chrII	+	TATA-less	-	27	9602	9572	-30	tL(UAA)B1	29.4	0.472167716	NA	NA	NA	NA	NA	NA	NA	NA	NA	NA
76	77	YBL107C	chrII	-	TATA-containing	TAF1-enriched	709	10487	10551	-64	YBL107C	389.6	0.020302021	0.058966338	0.441356731	0.403474918	0.275695999	0.159357954	0.360193638	0.81323791	0.037834475	1	TRUE
77	78	YBL105C	chrII	-	TATA-less	TAF1-enriched	486	17903	17938	-35	YBL105C	208.7	0.184306579	NA	NA	NA	NA	NA	NA	NA	NA	NA	NA
78	79	YBL104C	chrII	-	TATA-less	TAF1-enriched	42	21267	21313	-46	YBL104C	269.6	0.011779072	0.437590313	0.169628471	0.172101719	0.427705542	0.077929298	0.399685367	0.148134206	0.172101719	0	FALSE
79	80	YBL103C	chrII	-	TATA-less	TAF1-enriched	150	23738	23774	-36	YBL103C	390.9	0.010607145	0.700422104	0.192836662	0.070688704	0.48071237	0.019625251	0.078604596	0.941609659	0.501115104	1	TRUE
80	81	YBL102W	chrII	+	TATA-less	TAF1-depleted	7231	24044	23992	-52	YBL102W	2724.7	0.001558635	0.425318566	0.001428091	0.674352439	0.037120825	0.587506654	0.026674075	0.133686355	0.674352439	3	TRUE
81	82	YBL100W-C	chrII	+	TATA-less	TAF1-enriched	21	28361	28298	-63	YBL100W-C	17.2	0.57687131	NA	NA	NA	NA	NA	NA	NA	NA	NA	NA
82	83	tF(GAA)B	chrII	-	TATA-less	-	34	NA	36234	NA	tF(GAA)B	42	0.024219447	0.072691249	0.328254446	0.054091242	0.215426487	0.893298615	0.917250461	0.97530669	0.955385651	0	FALSE
83	84	YBL099W	chrII	+	TATA-less	TAF1-enriched	18812	36771	36744	-27	YBL099W	8636.2	0.000375218	0.168295313	0.032368102	0.385949972	0.187995046	0.177892141	0.5001066	0.089199146	0.385949972	1	TRUE
84	85	YBL097W	chrII	+	TATA-less	TAF1-enriched	20	40807	40775	-32	YBL097W	29.6	0.705803268	NA	NA	NA	NA	NA	NA	NA	NA	NA	NA
85	86	YBL095W	chrII	+	TATA-less	TAF1-enriched	143	43314	43267	-47	YBL095W	147.4	0.004496583	0.158558666	0.337388648	0.444693122	0.524183351	0.23315975	0.085494719	0.113461026	0.226229265	0	FALSE
86	87	YBL093C	chrII	-	TATA-less	TAF1-enriched	275	44973	44998	-25	YBL093C	1092.7	0.006875926	0.458162106	0.449395504	0.389518938	0.823465441	0.60704228	0.134161787	0.117941635	0.151529414	0	FALSE
87	88	YBL092W	chrII	+	TATA-less	TAF1-enriched	52404	45656	45613	-43	YBL092W	57143.5	0.00039021	0.021057903	0.043531244	0.323563881	0.286363289	1	1	1	1	2	TRUE
88	89	YBL091C-A	chrII	-	TATA-containing	TAF1-enriched	190	47154	47193	-39	YBL091C-A	240.6	0.060313208	NA	NA	NA	NA	NA	NA	NA	NA	NA	NA
89	90	YBL090W	chrII	+	TATA-less	TAF1-enriched	1881	48844	48794	-50	YBL090W	369.1	0.001965676	0.158476813	1	0.430405922	0.640741991	0.002970841	0.640741991	0.966858392	0.008716947	2	TRUE
90	91	YBL088C	chrII	-	TATA-less	TAF1-enriched	17	NA	59837	NA	YBL088C	67.2	0.171930372	NA	NA	NA	NA	NA	NA	NA	NA	NA	NA
91	92	YBL087C	chrII	-	TATA-less	TAF1-enriched	6036	60767	60773	-6	YBL087C	22978.4	0.000740074	0.021503717	0.49505543	0.317670344	0.309865259	0.592724186	0.054179698	0.066444151	0.155111408	1	TRUE
92	93	YBL085W	chrII	+	TATA-less	TAF1-enriched	158	63716	63685	-31	YBL085W	491.3	0.012400228	0.159357595	0.222982057	0.567239776	0.324466873	0.259140466	0.464752321	0.08117137	0.279842315	0	FALSE
93	94	YBL084C	chrII	-	TATA-less	TAF1-enriched	792	NA	69533	NA	YBL084C	289.1	0.001992728	0.054102345	0.141496382	0.778058886	0.163576858	0.047070006	0.306444428	0.876078226	0.99357483	1	TRUE
94	95	YBL082C	chrII	-	TATA-less	TAF1-enriched	593	71104	71163	-59	YBL082C	919.6	0.002781553	0.081020787	0.056640198	0.058057413	0.948774157	0.044290356	0.479747539	1	0.319339182	1	TRUE
95	96	YBL081W	chrII	+	TATA-less	TAF1-enriched	1265	71610	71552	-58	YBL081W	471.4	0.115102594	NA	NA	NA	NA	NA	NA	NA	NA	NA	NA
96	97	YBL080C	chrII	-	TATA-less	TAF1-enriched	186	74714	74736	-22	YBL080C	93.8	0.020449304	0.028431293	0.510933387	0.255871261	0.575410898	0.047331328	0.432957566	0.255839827	0.936225839	2	TRUE
97	98	orphan	chrII	+	TATA-less	TAF1-enriched	0	74978	74972	-6	orphan	6.9	0.024468031	0.021833547	0.631959838	0.31267633	0.892496221	0.052412476	0.720537784	0.290465177	0.720537784	1	TRUE
98	99	YBL079W	chrII	+	TATA-less	TAF1-enriched	817	75247	75196	-51	YBL079W	1642.3	0.002821776	0.081215098	0.73395472	0.006538646	0.476314708	0.000446724	0.560065815	0.53070351	0.006538646	3	TRUE
99	100	YBL078C	chrII	-	TATA-less	TAF1-enriched	223	80736	80752	-16	YBL078C	1516.3	0.001971088	0.087045286	0.608724026	0.06309837	0.898012656	0.012323996	0.089454479	0.330983736	0.037269536	2	TRUE
100	101	YBL076C	chrII	-	TATA-less	TAF1-enriched	2496	84250	84287	-37	YBL076C	7043.4	0.000159298	0.126952455	0.051050191	0.105190715	1	0.045214441	1	1	0.022896012	2	TRUE
101	102	YBL074C	chrII	-	TATA-less	TAF1-enriched	84	87776	87790	-14	YBL074C	207.8	0.003606961	0.126750932	0.976795614	0.229047913	0.222940484	0.049510086	0.385253549	0.040712948	0.153910617	2	TRUE
102	103	YBL072C	chrII	-	TATA-less	TAF1-enriched	922	89430	89501	-71	YBL072C	5028.2	0.000984797	1	0.062123553	0.020187944	0.193221607	0.008594227	0.318385106	0.942494207	0.033067544	3	TRUE
103	104	YBL071W-A	chrII	+	TATA-less	TAF1-enriched	295	89992	89943	-49	YBL071W-A	808.6	0.000986253	0.630224886	0.057898585	0.192774229	0.349858912	0.028007432	0.157279733	0.672345023	0.041597769	2	TRUE
104	105	YBL069W	chrII	+	TATA-containing	TAF1-enriched	1612	90717	90694	-23	YBL069W	899.7	0.013619814	0.173404612	0.084114111	0.040904632	0.682613725	0.000567294	0.051381009	0.437569753	0.12567868	2	TRUE
105	106	YBL068W	chrII	+	TATA-less	TAF1-enriched	619	92417	92357	-60	YBL068W	229.2	0.601538516	NA	NA	NA	NA	NA	NA	NA	NA	NA	NA
106	107	YBL067C	chrII	-	TATA-less	TAF1-enriched	265	96093	96109	-16	YBL067C	789.8	0.59459356	NA	NA	NA	NA	NA	NA	NA	NA	NA	NA
107	108	orphan	chrII	-	TATA-containing	TAF1-enriched	91	100118	100156	-38	orphan	63.4	0.003686533	0.212866457	0.272457047	0.021519986	0.81377456	0.02692298	0.81377456	0.482311594	0.128774536	2	TRUE
108	109	YBL064C	chrII	-	TATA-containing	TAF1-depleted	1090	101160	101188	-28	YBL064C	4574.9	0.000421465	0.454942934	0.024987265	0.03070435	0.132049147	0.002340017	0.279945542	0.459488048	0.077061659	3	TRUE
109	110	YBL063W	chrII	+	TATA-less	TAF1-enriched	1253	101912	101877	-35	YBL063W	25.9	0.096755439	NA	NA	NA	NA	NA	NA	NA	NA	NA	NA
110	111	YBL061C	chrII	-	TATA-less	TAF1-enriched	247	107453	107506	-53	YBL061C	593.1	0.270193827	NA	NA	NA	NA	NA	NA	NA	NA	NA	NA
111	112	YBL059W	chrII	+	TATA-less	TAF1-depleted	1398	110729	110700	-29	YBL059W	833.9	0.002408235	0.069873872	0.027283739	0.205831641	0.028240717	0.172413995	0.009929821	0.321024389	0.378440542	3	TRUE
112	113	orphan	chrII	-	TATA-less	TAF1-enriched	207	111179	111201	-22	orphan	14.8	0.147009175	NA	NA	NA	NA	NA	NA	NA	NA	NA	NA
113	114	YBL058W	chrII	+	TATA-containing	TAF1-enriched	3535	111457	111409	-48	YBL058W	932.5	0.001733194	0.048378211	0.009691077	1	1	1	0.03058407	0.04844498	1	4	TRUE
114	115	YBL057C	chrII	-	TATA-less	TAF1-enriched	996	113396	113442	-46	YBL057C	968.9	0.015922752	0.057084793	0.013605509	0.93511078	0.261205341	0.916289981	0.961038947	0.949714826	0.42493952	1	TRUE
115	116	YBL056W	chrII	+	TATA-less	TAF1-enriched	806	113695	113654	-41	YBL056W	2267.9	0.041406788	0.549453472	0.320824175	0.866641554	0.074551572	0.451084441	0.67170216	0.812316826	0.804219013	0	FALSE
116	117	YBL055C	chrII	-	TATA-less	TAF1-depleted	814	116669	116815	-146	YBL055C	793.6	0.021691604	0.275828596	0.352417834	0.315982266	0.130513274	0.202665423	0.115084005	0.524126688	0.147501198	0	FALSE
117	118	YBL054W	chrII	+	TATA-less	TAF1-enriched	3302	117634	117478	-156	YBL054W	204.1	0.021582961	0.065160214	0.027301456	0.774630167	0.37304452	0.399808559	0.18149126	0.294951986	0.048557972	2	TRUE
118	119	YBL051C	chrII	-	TATA-less	TAF1-enriched	2290	124784	124822	-38	YBL051C	2563	0.030791682	0.518644284	0.860271814	0.635472497	0.023963839	0.436603242	0.015588952	0.072740935	0.278070399	2	TRUE
119	120	YBL050W	chrII	+	TATA-less	TAF1-enriched	4033	125087	125042	-45	YBL050W	955.3	0.003796458	0.049730729	0.9067407	0.080373253	0.254725207	0.153017046	0.044942888	0.246157963	0.193819652	2	TRUE
120	121	ST3710	chrII	-	TATA-less	TAF1-enriched	36	127363	127512	-149	ST3710	175	0.010165799	0.46838967	0.045362163	0.395374737	0.064206949	0.689211794	0.141704874	0.361427045	0.169393667	1	TRUE
121	122	YBL047C	chrII	-	TATA-less	TAF1-enriched	233	132164	132196	-32	YBL047C	4466.2	0.001316792	0.918562986	0.007518726	0.212019977	0.200534223	0.049720687	0.109589979	0.563007908	0.2364017	2	TRUE
122	123	YBL046W	chrII	+	TATA-less	TAF1-enriched	94	132473	132413	-60	YBL046W	380.5	0.025922176	0.551995386	0.258447478	0.144889401	0.392469532	0.112366951	0.763157021	0.606416337	0.365988507	0	FALSE
123	124	YBL045C	chrII	-	TATA-less	TAF1-enriched	2521	135679	135702	-23	YBL045C	1906.1	0.02565052	0.01711831	0.178412509	0.052531036	0.12796801	0.22230049	0.12796801	0.86856419	0.73651018	1	TRUE
124	125	YBL042C	chrII	-	TATA-containing	TAF1-depleted	154	140319	140326	-7	YBL042C	807.2	0.004713207	0.007332174	0.927166588	0.112859568	0.176432308	0.746555768	0.249505233	0.22760386	0.906999436	1	TRUE
125	126	YBL041W	chrII	+	TATA-less	TAF1-enriched	8168	141261	141225	-36	YBL041W	3180.3	0.089407643	NA	NA	NA	NA	NA	NA	NA	NA	NA	NA
126	127	YBL040C	chrII	-	TATA-less	TAF1-enriched	830	142845	142900	-55	YBL040C	546.4	0.0450143	0.044483684	0.49670377	0.103801434	0.413702683	0.035723828	0.004278865	0.683660074	0.993542774	3	TRUE
127	128	YBL039W-B	chrII	+	TATA-less	TAF1-enriched	30	NA	143183	NA	YBL039W-B	262.1	0.145225348	NA	NA	NA	NA	NA	NA	NA	NA	NA	NA
128	129	YBL039C	chrII	-	TATA-less	TAF1-enriched	180	145752	145782	-30	YBL039C	7600.6	0.000862679	0.112003449	0.136964583	0.036409833	0.643231402	0.015843566	0.643231402	0.421300854	0.042516065	3	TRUE
129	130	YBL038W	chrII	+	TATA-less	TAF1-enriched	5178	146169	146124	-45	YBL038W	1148.8	0.000452798	0.090496987	0.050794729	0.010241674	1	0.963280282	1	1	0.100924882	1	TRUE
130	131	YBL037W	chrII	+	TATA-less	TAF1-depleted	169	147118	147126	8	YBL037W	587.8	0.000283072	0.432221695	0.080928587	0.104136968	0.278624966	0.022422091	0.111102994	0.303742107	0.097522464	1	TRUE
131	132	YBL036C	chrII	-	TATA-less	TAF1-enriched	780	151195	151236	-41	YBL036C	1733.8	0.001979464	0.025789106	0.255484034	0.895678443	0.470802792	0.040121091	0.470802792	0.582213305	0.64628546	2	TRUE
132	133	YBL035C	chrII	-	TATA-containing	TAF1-enriched	50	153636	153688	-52	YBL035C	635.3	0.001819752	0.117207184	0.120704071	0.253708584	0.151913301	0.35232059	0.019312662	0.842606831	0.022925095	2	TRUE
133	134	YBL034C	chrII	-	TATA-less	TAF1-depleted	391	158427	158464	-37	YBL034C	152.4	0.033936155	0.01213462	0.825857141	0.0558668	0.961554039	0.290092709	0.085567197	0.851902554	0.735796775	1	TRUE
134	135	YBL033C	chrII	-	TATA-containing	TAF1-enriched	2013	159678	159721	-43	YBL033C	1614.5	0.000161661	0.239637139	0.040337394	0.09864761	1	0.055008834	1	0.036674698	0.234423586	2	TRUE
135	136	YBL032W	chrII	+	TATA-less	TAF1-enriched	9884	160147	160094	-53	YBL032W	490.5	0.002853709	0.007537093	0.037218661	0.063993771	0.740830195	0.023628946	0.740830195	0.454910793	0.321069512	3	TRUE
136	137	YBL031W	chrII	+	TATA-less	TAF1-enriched	355	161724	161669	-55	YBL031W	716.7	0.002958203	0.395469858	0.142902275	0.051181379	0.916916497	0.007293538	0.219540833	0.527429057	0.547281824	1	TRUE
137	138	YBL030C	chrII	-	TATA-containing	TAF1-depleted	79034	164107	164125	-18	YBL030C	11259.1	0.001870816	0.036630521	0.902160274	0.033922438	1	0.006177847	1	0.434014873	0.046997109	4	TRUE
138	139	YBL029C-A	chrII	-	TATA-less	TAF1-depleted	444	164688	164811	-123	YBL029C-A	1111.3	0.243393016	NA	NA	NA	NA	NA	NA	NA	NA	NA	NA
139	140	YBL029W	chrII	+	TATA-containing	TAF1-depleted	100	166224	166098	-126	YBL029W	36.1	0.075603866	NA	NA	NA	NA	NA	NA	NA	NA	NA	NA
140	141	ST3723	chrII	-	TATA-less	TAF1-enriched	28	166853	166954	-101	ST3723	311.6	0.044554744	0.039157383	0.608668277	0.470859606	0.712461252	0.009145871	0.665270024	0.136366606	0.183520226	2	TRUE
141	142	YBL028C	chrII	-	TATA-less	TAF1-enriched	175	167808	167890	-82	YBL028C	4023.3	0.000489801	0.264557343	0.021924368	0.012059281	0.597147984	0.002835257	0.597147984	0.669789681	0.085861308	3	TRUE
142	143	YBL027W	chrII	+	TATA-less	TAF1-depleted	18516	168595	168392	-203	YBL027W	12992.1	0.000213569	0.0036655	1	0.015444238	0.037910538	1	0.057061996	0.00736501	0.057061996	4	TRUE
143	144	ST3726	chrII	-	TATA-less	TAF1-enriched	18	170358	170387	-29	ST3726	16.1	0.254149703	NA	NA	NA	NA	NA	NA	NA	NA	NA	NA
144	145	YBL026W	chrII	+	TATA-less	TAF1-enriched	628	NA	170558	NA	YBL026W	2467.1	0.042505778	0.199190278	0.274824103	0.662496454	0.201575385	0.337054484	0.050461863	0.966706609	0.858863773	0	FALSE
145	146	YBL025W	chrII	+	TATA-less	TAF1-enriched	405	NA	171433	NA	YBL025W	226.7	0.000954737	0.295529581	0.383359271	0.096280141	0.529572275	0.007795524	0.087098169	0.318999572	0.078636316	1	TRUE
146	147	YBL024W	chrII	+	TATA-less	TAF1-enriched	994	172551	172509	-42	YBL024W	5752.4	0.007050126	0.153232362	0.047479108	0.146287481	0.786085948	0.522879561	0.786085948	0.592053599	0.17478647	1	TRUE
147	148	YBL021C	chrII	-	TATA-less	TAF1-enriched	371	182071	182118	-47	YBL021C	317.2	0.103822457	NA	NA	NA	NA	NA	NA	NA	NA	NA	NA
148	149	YBL020W	chrII	+	TATA-less	TAF1-enriched	219	182347	182320	-27	YBL020W	1482.4	0.003205667	0.92869271	0.027285185	0.347492232	0.391018332	0.01484109	0.087752394	0.824721979	0.606788362	2	TRUE
149	150	YBL018C	chrII	-	TATA-less	TAF1-enriched	303	186457	186504	-47	YBL018C	616.8	0.010789317	0.187109133	0.240954669	0.624328868	0.068391681	0.527235551	0.027260007	0.763743081	0.878763302	1	TRUE
150	151	YBL017C	chrII	-	TATA-less	TAF1-enriched	599	191553	191678	-125	YBL017C	605	0.003649185	0.078889429	0.004035627	0.805236789	0.7323328	0.237645399	0.099663364	0.614849729	0.055247405	1	TRUE
151	152	YBL016W	chrII	+	TATA-containing	TAF1-depleted	226	192555	192369	-186	YBL016W	410	0.006549613	0.884227908	0.046055894	0.655144368	0.749711867	0.174111056	0.079326685	0.04577274	0.170130985	2	TRUE
152	153	YBL015W	chrII	+	TATA-containing	TAF1-depleted	1746	194303	194033	-270	YBL015W	265.4	0.005898602	0.095039259	0.631907621	0.027635173	0.352232898	0.000630498	0.980969866	0.31940783	0.004100686	3	TRUE
153	154	YBL014C	chrII	-	TATA-less	TAF1-enriched	47	201730	201777	-47	YBL014C	355.2	0.078371157	NA	NA	NA	NA	NA	NA	NA	NA	NA	NA
154	155	YBL013W	chrII	+	TATA-less	TAF1-enriched	197	202035	202036	1	YBL013W	77.3	0.103371206	NA	NA	NA	NA	NA	NA	NA	NA	NA	NA
155	156	YBL011W	chrII	+	TATA-less	TAF1-enriched	1065	203511	203445	-66	YBL011W	1601.4	0.018189041	0.160921385	0.006088008	0.192887629	0.270564506	0.092766143	0.270564506	0.195988877	0.192887629	1	TRUE
156	157	YBL010C	chrII	-	TATA-less	TAF1-enriched	22	206911	206951	-40	YBL010C	128.2	0.186760027	NA	NA	NA	NA	NA	NA	NA	NA	NA	NA
157	158	YBL009W	chrII	+	TATA-less	TAF1-enriched	330	207210	207159	-51	YBL009W	179.5	0.014829155	0.816056234	0.008500447	0.756131108	0.615890939	0.262470713	0.638476793	0.014831405	0.879738245	2	TRUE
158	159	YBL008W	chrII	+	TATA-less	TAF1-enriched	31	209636	209598	-38	YBL008W	89	0.120498343	NA	NA	NA	NA	NA	NA	NA	NA	NA	NA
159	160	YBL007C	chrII	-	TATA-containing	TAF1-enriched	311	216362	216415	-53	YBL007C	2871.7	0.018735712	0.639617645	0.090706587	0.304963181	0.89469362	0.004808143	0.408068818	0.023559627	0.89469362	2	TRUE
160	161	YBL006C	chrII	-	TATA-less	TAF1-enriched	678	217097	217150	-53	YBL006C	1563.9	0.002504828	0.208667788	0.155062453	0.125277606	0.617027761	0.141268184	0.121288348	0.13017347	0.605531182	0	FALSE
161	162	YBL005W	chrII	+	TATA-less	TAF1-enriched	827	217562	217555	-7	YBL005W	290.6	0.003515407	0.52751324	0.017298795	0.163841633	0.022755008	0.33392559	0.178954837	0.154625614	0.669719804	2	TRUE
162	163	orphan	chrII	-	TATA-less	TAF1-enriched	245	220917	220982	-65	orphan	240.8	0.514103173	NA	NA	NA	NA	NA	NA	NA	NA	NA	NA
163	164	tS(AGA)B	chrII	+	TATA-less	-	28	227282	227202	-80	tS(AGA)B	39.4	0.365557737	NA	NA	NA	NA	NA	NA	NA	NA	NA	NA
164	165	YBL004W	chrII	+	TATA-less	TAF1-enriched	210	227580	227522	-58	YBL004W	2265.3	0.00036245	0.195730214	0.077683218	0.049426519	0.384460471	0.022186551	0.186612624	0.677521914	0.287793112	2	TRUE
165	166	YBL003C	chrII	-	TATA-containing	TAF1-depleted	2179	235757	235846	-89	YBL003C	11619	0.011484192	0.081046008	0.248810874	0.427416552	0.783056856	0.057072782	0.783056856	0.477134614	0.012058377	1	TRUE
166	167	ST3737	chrII	-	TATA-less	TAF1-enriched	25	235920	235996	-76	ST3737	8032.5	0.02910993	0.013718734	0.710513586	0.696293475	0.416112071	0.689944401	0.602758108	0.192993902	0.143266978	1	TRUE
167	168	YBL002W	chrII	+	TATA-containing	TAF1-depleted	29896	236541	236458	-83	YBL002W	5701.3	0.01233605	0.341678723	0.037001884	0.1789451	0.400904824	0.930865873	1	0.58766574	0.106785315	1	TRUE
168	169	ST0101	chrII	+	TATA-less	TAF1-enriched	60	NA	238527	NA	ST0101	26.9	0.339016955	NA	NA	NA	NA	NA	NA	NA	NA	NA	NA
169	170	YBR001C	chrII	-	TATA-containing	TAF1-depleted	39	241189	241415	-226	YBR001C	426.5	0.002856851	0.370648365	0.117183851	0.273462498	0.404505562	0.003591194	0.806319445	0.342332753	0.245843628	1	TRUE
170	171	YBR002C	chrII	-	TATA-less	TAF1-enriched	109	242541	242588	-47	YBR002C	724.5	0.000359536	0.093885629	0.069743802	0.074320786	0.074320786	0.006589165	1	1	0.438656693	1	TRUE
171	172	YBR003W	chrII	+	TATA-less	TAF1-enriched	705	242830	242780	-50	YBR003W	232.2	0.185007256	NA	NA	NA	NA	NA	NA	NA	NA	NA	NA
172	173	YBR005W	chrII	+	TATA-less	TAF1-depleted	929	245894	245859	-35	YBR005W	5359.9	0.003326783	0.044767614	0.010063306	0.033068735	0.7754257	0.005933587	0.7754257	0.501832859	0.174051618	4	TRUE
173	174	ST3742	chrII	-	TATA-containing	TAF1-enriched	131	248461	248558	-97	ST3742	42.3	0.346053565	NA	NA	NA	NA	NA	NA	NA	NA	NA	NA
174	175	YBR007C	chrII	-	TATA-less	TAF1-depleted	94	250937	250975	-38	YBR007C	187.8	0.162503215	NA	NA	NA	NA	NA	NA	NA	NA	NA	NA
175	176	YBR008C	chrII	-	TATA-less	TAF1-enriched	71	254381	254427	-46	YBR008C	300.5	0.004621239	0.215154163	0.157212967	0.773699711	0.0594329	0.710480276	0.090401287	0.007340924	0.923642641	1	TRUE
176	177	CUT009	chrII	+	TATA-containing	TAF1-depleted	158	254872	254792	-80	CUT009	67.3	0.110706643	NA	NA	NA	NA	NA	NA	NA	NA	NA	NA
177	178	YBR009C	chrII	-	TATA-containing	TAF1-depleted	2223	255665	255721	-56	YBR009C	15174.2	0.000812905	0.077759896	0.717190659	0.029085015	0.856255954	0.013853855	0.856255954	0.815098647	0.013957375	3	TRUE
178	179	orphan	chrII	+	TATA-less	TAF1-enriched	35	256148	256102	-46	orphan	32.5	0.833111556	NA	NA	NA	NA	NA	NA	NA	NA	NA	NA
179	180	YBR010W	chrII	+	TATA-containing	TAF1-depleted	7747	256369	256303	-66	YBR010W	7630.2	0.002012486	0.261341604	0.033319069	0.151913301	0.209581486	0.070615468	0.481270529	0.105268204	0.118211415	1	TRUE
180	181	YBR011C	chrII	-	TATA-less	TAF1-enriched	30377	257978	258014	-36	YBR011C	10064.4	0.009011187	0.086755678	0.255570907	0.871506756	0.044895036	0.834595199	0.027826026	0.75411533	0.770943642	2	TRUE
181	182	orphan	chrII	-	TATA-less	TAF1-enriched	2	258136	258198	-62	orphan	43.7	0.027637801	0.054284651	0.162456647	0.677008335	0.7402374	0.59074108	0.7402374	0.668640209	0.677008335	0	FALSE
182	183	YBR014C	chrII	-	TATA-less	TAF1-depleted	133	267202	267396	-194	YBR014C	1240.8	0.003562381	0.141609103	0.018054359	0.958127364	0.430956934	0.945959206	0.930269211	0.309282186	0.430956934	1	TRUE
183	184	YBR015C	chrII	-	TATA-less	TAF1-enriched	1789	269566	269599	-33	YBR015C	1053.7	0.00128662	0.782561729	0.051606607	0.726294695	0.152127211	0.015352522	0.152127211	0.651323913	0.152127211	1	TRUE
184	185	YBR016W	chrII	+	TATA-containing	TAF1-enriched	55499	270232	270231	-1	YBR016W	1484.4	0.000412394	0.564600237	0.111465608	0.037925418	0.397068013	0.007369579	0.397068013	0.274260575	0.037925418	3	TRUE
185	186	YBR017C	chrII	-	TATA-less	TAF1-enriched	1279	273701	273755	-54	YBR017C	1255.5	0.006178009	0.274498222	0.033399836	0.064104214	0.544175537	0.043453812	0.12546369	0.483564579	0.250482354	2	TRUE
186	187	ST0112	chrII	+	TATA-less	TAF1-enriched	89	276986	276820	-166	ST0112	193.1	0.553309968	NA	NA	NA	NA	NA	NA	NA	NA	NA	NA
187	188	CUT445	chrII	-	TATA-less	TAF1-enriched	9	NA	280863	NA	CUT445	10.2	0.544997046	NA	NA	NA	NA	NA	NA	NA	NA	NA	NA
188	189	YBR021W	chrII	+	TATA-less	TAF1-enriched	571	281503	281353	-150	YBR021W	70.9	0.085999257	NA	NA	NA	NA	NA	NA	NA	NA	NA	NA
189	190	YBR022W	chrII	+	TATA-less	TAF1-depleted	123	283853	283724	-129	YBR022W	101.5	0.509130381	NA	NA	NA	NA	NA	NA	NA	NA	NA	NA
190	191	YBR023C	chrII	-	TATA-less	TAF1-enriched	232	288035	288069	-34	YBR023C	1229.2	0.02357567	0.512792121	0.861447115	0.08105204	0.023184028	0.404823429	0.068110207	0.106385763	0.661281082	1	TRUE
191	192	orphan	chrII	-	TATA-containing	TAF1-enriched	4	288300	288311	-11	orphan	2	0.371009866	NA	NA	NA	NA	NA	NA	NA	NA	NA	NA
192	193	YBR024W	chrII	+	TATA-less	TAF1-enriched	1626	289381	289332	-49	YBR024W	286.3	0.180366029	NA	NA	NA	NA	NA	NA	NA	NA	NA	NA
193	194	orphan	chrII	-	TATA-less	TAF1-enriched	56	290205	290530	-325	orphan	124.5	0.65748052	NA	NA	NA	NA	NA	NA	NA	NA	NA	NA
194	195	YBR025C	chrII	-	TATA-less	TAF1-enriched	3027	291754	291898	-144	YBR025C	8266.1	0.007065514	0.079387277	0.079387277	0.290544475	0.948925447	0.649232	0.352984729	0.535111727	0.404996397	0	FALSE
195	196	orphan	chrII	+	TATA-less	TAF1-enriched	48	NA	292331	NA	orphan	36.8	0.132535321	NA	NA	NA	NA	NA	NA	NA	NA	NA	NA
196	197	YBR026C	chrII	-	TATA-less	TAF1-depleted	2260	293948	294052	-104	YBR026C	244	0.480418403	NA	NA	NA	NA	NA	NA	NA	NA	NA	NA
197	198	YBR028C	chrII	-	TATA-less	TAF1-enriched	156	296023	296083	-60	YBR028C	508.1	0.019388368	0.426799496	0.012880548	0.135913368	0.802684818	0.029641109	0.942168948	0.975095693	0.135913368	2	TRUE
198	199	YBR029C	chrII	-	TATA-less	TAF1-enriched	8765	297772	297822	-50	YBR029C	935.8	0.077476533	NA	NA	NA	NA	NA	NA	NA	NA	NA	NA
199	200	orphan	chrII	+	TATA-less	TAF1-enriched	7	298060	298021	-39	orphan	33.9	0.259081591	NA	NA	NA	NA	NA	NA	NA	NA	NA	NA
200	201	YBR030W	chrII	+	TATA-less	TAF1-enriched	15	298274	298203	-71	YBR030W	312.3	0.048654391	0.782740403	0.245621196	0.369048842	0.422051964	0.766002538	0.780842695	0.877660942	0.096637757	0	FALSE
201	202	CUT446	chrII	-	TATA-less	TAF1-enriched	2	299867	299891	-24	CUT446	36.2	0.062372096	NA	NA	NA	NA	NA	NA	NA	NA	NA	NA
202	203	YBR031W	chrII	+	TATA-containing	TAF1-depleted	725309	300178	300150	-28	YBR031W	53023.9	0.000222408	0.17038849	0.095119237	0.167778325	0.519058183	0.074950199	0.119010183	0.074950199	0.167778325	0	FALSE
203	204	YBR034C	chrII	-	TATA-containing	TAF1-depleted	1578	305977	306005	-28	YBR034C	1252.1	0.011380933	0.156282473	0.249374564	0.228129769	0.003500783	0.032301477	0.004300297	0.730399597	0.228129769	3	TRUE
204	205	CUT011	chrII	+	TATA-containing	TAF1-enriched	436	306313	306279	-34	CUT011	222.8	0.016107944	0.003937671	0.281244987	0.866988339	0.216384289	0.068387367	0.411375909	0.170871636	0.968190858	1	TRUE
205	206	YBR035C	chrII	-	TATA-less	TAF1-enriched	47636	306956	306982	-26	YBR035C	7143.1	0.000409977	0.030413406	0.553141867	0.076671787	0.248847884	0.008767896	0.637636548	0.866785992	0.389346102	2	TRUE
206	207	orphan	chrII	-	TATA-containing	TAF1-depleted	15682	307284	307344	-60	orphan	57461.8	0.005877803	0.001103527	0.044424641	0.155586146	0.885813983	0.004771658	0.961821712	0.322785387	0.492648061	3	TRUE
207	208	orphan	chrII	+	TATA-less	TAF1-enriched	1678	307608	307579	-29	orphan	7217.7	0.006277036	0.755473362	0.138073764	0.062870361	0.411990038	0.016333005	0.350244591	0.339950339	0.714720855	1	TRUE
208	209	YBR036C	chrII	-	TATA-less	TAF1-enriched	1950	310332	310361	-29	YBR036C	5034.9	0.000484559	0.135474961	0.265998928	0.020518238	0.558416116	0.021007496	0.160656659	0.827950291	0.042545543	3	TRUE
209	210	YBR037C	chrII	-	TATA-less	TAF1-enriched	89	311440	311468	-28	YBR037C	624.4	0.012252188	0.348140944	0.015207066	0.825690684	0.339912827	0.605865292	0.339912827	0.534410569	0.825690684	1	TRUE
210	211	YBR038W	chrII	+	TATA-less	TAF1-enriched	1842	311993	311843	-150	YBR038W	283.5	0.459792976	NA	NA	NA	NA	NA	NA	NA	NA	NA	NA
211	212	YBR039W	chrII	+	TATA-less	TAF1-enriched	2425	315566	315496	-70	YBR039W	4621.7	0.001015838	0.037789916	0.72367361	0.088661879	0.24201557	0.007426616	0.172689434	0.624428773	0.188442495	2	TRUE
212	213	YBR042C	chrII	-	TATA-less	TAF1-enriched	149	321611	321636	-25	YBR042C	193.7	0.106763394	NA	NA	NA	NA	NA	NA	NA	NA	NA	NA
213	214	YBR043C	chrII	-	TATA-less	TAF1-enriched	59	324014	324023	-9	YBR043C	424.2	0.079009959	NA	NA	NA	NA	NA	NA	NA	NA	NA	NA
214	215	ANT014	chrII	+	TATA-less	TAF1-enriched	112	324489	324413	-76	ANT014	46.5	0.022087187	0.495461754	0.186906496	0.464888965	0.52510507	0.00814836	0.048834114	0.189292624	0.408722065	2	TRUE
215	216	tV(UAC)B	chrII	+	TATA-less	-	0	NA	326878	NA	tV(UAC)B	1.7	0.20998385	NA	NA	NA	NA	NA	NA	NA	NA	NA	NA
216	217	orphan	chrII	+	TATA-less	TAF1-enriched	28	NA	327303	NA	orphan	1.6	0.078740038	NA	NA	NA	NA	NA	NA	NA	NA	NA	NA
217	218	YBR046C	chrII	-	TATA-less	TAF1-enriched	237	331527	331542	-15	YBR046C	499.8	0.04055439	0.838009308	0.070178251	0.90450296	0.192326264	0.958824299	0.079836616	0.426562993	0.39209647	0	FALSE
218	219	YBR048W	chrII	+	TATA-less	TAF1-enriched	18374	332851	332811	-40	YBR048W	22768.9	0.000262733	0.41505847	0.012229752	0.026725624	0.766004847	0.091750004	0.105169451	0.70082571	0.766004847	2	TRUE
219	220	YBR049C	chrII	-	TATA-less	TAF1-enriched	464	336836	336957	-121	YBR049C	645	0.018603041	0.726636697	0.321909422	0.070120275	0.487597769	0.101475143	0.070120275	0.025406858	0.011962583	2	TRUE
220	221	orphan	chrII	+	TATA-less	TAF1-enriched	35	337258	337210	-48	orphan	152.9	0.107753528	NA	NA	NA	NA	NA	NA	NA	NA	NA	NA
221	222	orphan	chrII	-	TATA-less	TAF1-enriched	45	338565	338796	-231	orphan	38.2	0.059165987	NA	NA	NA	NA	NA	NA	NA	NA	NA	NA
222	223	YBR052C	chrII	-	TATA-less	TAF1-depleted	9302	339378	339413	-35	YBR052C	1290.9	0.005057649	0.420771925	0.301633677	0.36008448	0.080601286	0.085690957	0.080601286	0.107143038	0.326215918	0	FALSE
223	224	YBR053C	chrII	-	TATA-less	TAF1-enriched	235	340746	340763	-17	YBR053C	1002.8	0.017215713	0.648104487	0.648104487	0.131501714	0.144782505	0.051524417	0.058556637	0.613139633	0.131501714	0	FALSE
224	226	orphan	chrII	-	TATA-less	TAF1-enriched	21	341347	341378	-31	orphan	81.6	0.024579315	0.17278944	0.026488033	0.594568247	0.164484189	0.006993869	0.855029447	0.893941487	0.016086789	3	TRUE
225	227	orphan	chrII	+	TATA-less	TAF1-enriched	48	NA	341631	NA	orphan	11.5	0.247208565	NA	NA	NA	NA	NA	NA	NA	NA	NA	NA
226	228	orphan	chrII	+	TATA-less	TAF1-enriched	20	342061	342001	-60	orphan	43.9	0.142498822	NA	NA	NA	NA	NA	NA	NA	NA	NA	NA
227	229	orphan	chrII	+	TATA-less	TAF1-enriched	5	342261	342193	-68	orphan	42.8	0.199107688	NA	NA	NA	NA	NA	NA	NA	NA	NA	NA
228	230	YBR054W	chrII	+	TATA-containing	TAF1-depleted	5754	343197	342787	-410	YBR054W	3795.7	0.001603381	0.025661077	0.013166809	0.098233901	0.841718934	0.017213177	0.955409786	0.844663279	0.253347295	3	TRUE
229	231	orphan	chrII	-	TATA-less	TAF1-enriched	12	344101	344161	-60	orphan	2.6	0.125096942	NA	NA	NA	NA	NA	NA	NA	NA	NA	NA
230	232	YBR055C	chrII	-	TATA-containing	TAF1-enriched	410	347266	347318	-52	YBR055C	390.9	0.180829181	NA	NA	NA	NA	NA	NA	NA	NA	NA	NA
231	233	YBR056W	chrII	+	TATA-less	TAF1-enriched	3395	348020	347867	-153	YBR056W	1556.7	0.005447973	0.06288577	1	0.183424195	0.354368972	0.000547195	0.390455304	0.711706472	0.183424195	1	TRUE
232	234	tQ(UUG)B	chrII	+	TATA-less	-	59	350834	350819	-15	tQ(UUG)B	16.1	0.195942415	NA	NA	NA	NA	NA	NA	NA	NA	NA	NA
233	235	YBR056W-A	chrII	+	TATA-less	TAF1-enriched	141	351285	351157	-128	YBR056W-A	896.3	0.000961971	0.097215128	0.009789942	0.134850388	0.809424426	0.029299628	0.809424426	0.755536569	0.085371347	2	TRUE
234	236	YBR057C	chrII	-	TATA-less	TAF1-enriched	298	353359	353381	-22	YBR057C	917.7	0.000948179	0.030432202	0.455759777	0.134160086	0.316697326	0.156563681	0.057642901	0.0482522	0.051598941	2	TRUE
235	237	YBR058C-A	chrII	-	TATA-less	TAF1-enriched	1922	356567	356612	-45	YBR058C-A	8378.5	0.002500176	0.198285457	0.650417796	0.378440542	0.080892219	0.136610523	0.045310823	0.057169361	0.056692631	1	TRUE
236	238	YBR059C	chrII	-	TATA-less	TAF1-enriched	6858	360280	360307	-27	YBR059C	249.4	0.014509651	0.02320939	0.002812015	0.390733645	0.84106258	0.763939827	0.929689757	0.039326339	0.258048958	3	TRUE
237	239	CUT018	chrII	+	TATA-less	TAF1-enriched	4	360668	360615	-53	CUT018	8.6	0.345730446	NA	NA	NA	NA	NA	NA	NA	NA	NA	NA
238	240	YBR060C	chrII	-	TATA-less	TAF1-depleted	75	362567	362568	-1	YBR060C	636.2	0.001017762	0.005902967	0.398181307	0.009964043	0.817020986	0.008116833	0.288622475	0.177229031	0.052526927	3	TRUE
239	241	ST0138	chrII	+	TATA-less	TAF1-enriched	58	362900	362886	-14	ST0138	365.5	0.003619123	0.073045677	0.09663648	0.424739609	0.631984633	0.32252393	0.848075805	0.312545757	0.141904673	0	FALSE
240	242	YBR061C	chrII	-	TATA-less	TAF1-enriched	143	365694	365743	-49	YBR061C	516.5	0.420408456	NA	NA	NA	NA	NA	NA	NA	NA	NA	NA
241	243	YBR062C	chrII	-	TATA-less	TAF1-enriched	354	NA	366622	NA	YBR062C	157.1	0.001386673	0.048302857	0.222592239	0.071029015	0.854864682	0.008324091	0.993654628	0.629414111	0.076149104	2	TRUE
242	244	YBR065C	chrII	-	TATA-less	TAF1-enriched	145	369688	369720	-32	YBR065C	509.5	0.008398551	0.072749363	0.020131125	0.815276654	0.2059453	0.654722433	0.929386999	0.447721354	0.388691293	1	TRUE
243	245	CUT020	chrII	+	TATA-less	TAF1-enriched	197	370029	369956	-73	CUT020	6.4	0.487576677	NA	NA	NA	NA	NA	NA	NA	NA	NA	NA
244	246	YBR066C	chrII	-	TATA-containing	TAF1-enriched	2448	370731	370737	-6	YBR066C	336.8	0.066457101	NA	NA	NA	NA	NA	NA	NA	NA	NA	NA
245	247	orphan	chrII	-	TATA-less	TAF1-enriched	722	370932	370974	-42	orphan	126.2	0.750889364	NA	NA	NA	NA	NA	NA	NA	NA	NA	NA
246	248	ST0142	chrII	+	TATA-less	TAF1-enriched	27	371525	371436	-89	ST0142	47.1	0.813468989	NA	NA	NA	NA	NA	NA	NA	NA	NA	NA
247	249	YBR067C	chrII	-	TATA-containing	TAF1-depleted	62945	372699	372786	-87	YBR067C	3406.7	0.005859366	0.067283334	0.87308399	0.028716031	0.905029197	0.002806519	0.993653655	0.750236477	0.008468676	3	TRUE
248	250	orphan	chrII	+	TATA-less	TAF1-depleted	43	373492	373486	-6	orphan	26.2	0.243287077	NA	NA	NA	NA	NA	NA	NA	NA	NA	NA
249	251	orphan	chrII	-	TATA-less	TAF1-enriched	63	374724	374789	-65	orphan	46.7	0.634667789	NA	NA	NA	NA	NA	NA	NA	NA	NA	NA
250	252	YBR068C	chrII	-	TATA-containing	TAF1-depleted	198	375627	375729	-102	YBR068C	3348.3	0.011913234	0.222612766	0.517342513	0.028855288	0.53622878	0.009676406	0.158469159	0.873115289	0.084775508	2	TRUE
251	253	CUT021	chrII	+	TATA-less	TAF1-enriched	62	376588	376504	-84	CUT021	75.1	0.022288638	0.128689566	0.759011082	0.252538513	0.496427202	0.269034145	0.046331853	0.096292575	0.186755948	1	TRUE
252	254	YBR069C	chrII	-	TATA-containing	TAF1-depleted	1714	378536	378538	-2	YBR069C	3388	0.000602408	0.011860124	0.667743043	0.485666005	0.088659708	0.116426473	0.088659708	0.154613746	0.485666005	1	TRUE
253	255	CUT022	chrII	+	TATA-less	TAF1-depleted	30	379293	379263	-30	CUT022	13.3	0.183396376	NA	NA	NA	NA	NA	NA	NA	NA	NA	NA
254	256	YBR070C	chrII	-	TATA-less	TAF1-enriched	324	379956	379964	-8	YBR070C	803.5	0.288799962	NA	NA	NA	NA	NA	NA	NA	NA	NA	NA
255	257	YBR071W	chrII	+	TATA-less	TAF1-depleted	2455	380438	380435	-3	YBR071W	3505.5	0.18325315	NA	NA	NA	NA	NA	NA	NA	NA	NA	NA
256	258	orphan	chrII	-	TATA-less	TAF1-enriched	143	380948	380955	-7	orphan	133.8	0.110251054	NA	NA	NA	NA	NA	NA	NA	NA	NA	NA
257	259	CUT023	chrII	+	TATA-less	TAF1-enriched	7	381489	381213	-276	CUT023	46.6	0.31014224	NA	NA	NA	NA	NA	NA	NA	NA	NA	NA
258	260	YBR073W	chrII	+	TATA-containing	TAF1-enriched	1185	383177	383137	-40	YBR073W	546.3	0.003356185	0.264121277	0.029903426	0.683448171	0.174080759	0.725628907	0.785743852	0.039226078	0.683448171	2	TRUE
259	261	YBR074W	chrII	+	TATA-less	TAF1-enriched	430	NA	386281	NA	YBR074W	1610.9	0.001954444	0.358238354	0.10951802	0.014896928	0.672992151	0.008279243	0.92241271	0.208621813	0.04082577	3	TRUE
260	262	YBR076C-A	chrII	-	TATA-containing	TAF1-enriched	1216	391635	391670	-35	YBR076C-A	147.3	0.004436454	0.072115284	0.059374708	0.08619155	0.848800789	0.071086018	0.52510507	0.934613186	0.611175179	0	FALSE
261	263	orphan	chrII	-	TATA-less	TAF1-enriched	24	391881	392003	-122	orphan	93.2	0.492414366	NA	NA	NA	NA	NA	NA	NA	NA	NA	NA
262	264	YBR077C	chrII	-	TATA-less	TAF1-depleted	23	392279	392337	-58	YBR077C	202.5	0.553869829	NA	NA	NA	NA	NA	NA	NA	NA	NA	NA
263	265	YBR078W	chrII	+	TATA-less	TAF1-depleted	4352	NA	392947	NA	YBR078W	5145.8	0.000276168	0.144165144	0.139990092	0.079874876	0.544343321	0.013194579	1	0.695547432	0.01153446	2	TRUE
264	266	orphan	chrII	-	TATA-less	TAF1-enriched	2	393180	393296	-116	orphan	3.5	0.615194765	NA	NA	NA	NA	NA	NA	NA	NA	NA	NA
265	267	orphan	chrII	+	TATA-less	TAF1-enriched	336	393633	393552	-81	orphan	152.3	0.022527895	0.296491537	0.168363131	0.167006577	0.063112376	0.41208305	0.157463539	0.902079371	0.714867851	0	FALSE
266	268	YBR079C	chrII	-	TATA-less	TAF1-enriched	58032	398256	398302	-46	YBR079C	959.2	0.065104105	NA	NA	NA	NA	NA	NA	NA	NA	NA	NA
267	269	YBR080C	chrII	-	TATA-less	TAF1-enriched	4226	400870	400916	-46	YBR080C	385.2	0.006183874	0.240615257	0.025875829	0.889997035	0.136528318	0.776726863	0.479062433	0.508161509	0.293941917	1	TRUE
268	270	YBR081C	chrII	-	TATA-less	TAF1-enriched	14	405344	405397	-53	YBR081C	91.7	0.00414804	0.186434192	0.123808704	0.088797613	0.166454633	0.377290747	0.258807155	0.100465074	0.811441709	0	FALSE
269	271	YBR082C	chrII	-	TATA-less	TAF1-enriched	28186	407136	407246	-110	YBR082C	5697.4	0.002780523	0.183587001	0.242384531	0.124353874	0.149667849	0.028480782	0.423483688	0.725346362	0.405178842	1	TRUE
270	272	orphan	chrII	+	TATA-less	TAF1-enriched	10	NA	407639	NA	orphan	81.3	0.132636688	NA	NA	NA	NA	NA	NA	NA	NA	NA	NA
271	273	orphan	chrII	+	TATA-less	TAF1-depleted	7	408312	408152	-160	orphan	22.4	0.228460956	NA	NA	NA	NA	NA	NA	NA	NA	NA	NA
272	274	CUT453	chrII	-	TATA-less	TAF1-enriched	104	408312	408393	-81	CUT453	28.4	0.011379667	0.098180813	0.034179742	0.530202972	0.009371784	0.063363814	0.049699203	0.319741346	0.057567151	3	TRUE
273	275	YBR083W	chrII	+	TATA-containing	TAF1-depleted	284	409137	408940	-197	YBR083W	46.9	0.033839972	0.988420599	0.017998877	0.714617365	0.961959293	0.593589568	0.474346163	0.145046866	0.139261688	1	TRUE
274	276	YBR084W	chrII	+	TATA-less	TAF1-enriched	1028	411066	411016	-50	YBR084W	988	0.049410867	0.587341335	0.453138484	0.358638359	0.655692866	0.235983906	0.358638359	0.092628616	0.105799954	0	FALSE
275	277	YBR084C-A	chrII	-	TATA-less	TAF1-enriched	1960	415212	415311	-99	YBR084C-A	5325	0.000693406	0.25575879	0.058208931	0.177436963	0.253787467	0.07139361	0.030565013	0.25279149	0.318497207	1	TRUE
276	278	YBR085W	chrII	+	TATA-less	TAF1-depleted	93	415919	415908	-11	YBR085W	246.8	0.862182718	NA	NA	NA	NA	NA	NA	NA	NA	NA	NA
277	279	YBR085C-A	chrII	-	TATA-containing	TAF1-enriched	8770	419058	419193	-135	YBR085C-A	1916.1	0.003599524	0.015931835	0.211738434	0.258734136	0.599634023	0.002067553	0.599634023	0.565291804	0.08294481	2	TRUE
278	280	orphan	chrII	+	TATA-less	TAF1-enriched	201	419491	419476	-15	orphan	75.7	0.110835673	NA	NA	NA	NA	NA	NA	NA	NA	NA	NA
279	281	YBR086C	chrII	-	TATA-less	TAF1-depleted	889	423106	423269	-163	YBR086C	4315	0.000209403	0.235161066	0.252955756	0.172347565	0.056058694	0.018132045	0.056058694	0.152664586	0.431452213	1	TRUE
280	282	CUT024	chrII	+	TATA-less	TAF1-enriched	16	423600	423586	-14	CUT024	186.9	0.181686214	NA	NA	NA	NA	NA	NA	NA	NA	NA	NA
281	283	YBR087W	chrII	+	TATA-less	TAF1-enriched	351	423805	423754	-51	YBR087W	1002.2	0.188460608	NA	NA	NA	NA	NA	NA	NA	NA	NA	NA
282	284	YBR088C	chrII	-	TATA-containing	TAF1-depleted	2133	425824	425812	12	YBR088C	593.3	0.136843862	NA	NA	NA	NA	NA	NA	NA	NA	NA	NA
283	285	orphan	chrII	+	TATA-containing	TAF1-enriched	1	NA	426122	NA	orphan	11	0.326659793	NA	NA	NA	NA	NA	NA	NA	NA	NA	NA
284	286	orphan	chrII	+	TATA-less	TAF1-enriched	152	426829	426690	-139	orphan	1	0.289009614	NA	NA	NA	NA	NA	NA	NA	NA	NA	NA
285	287	YBR090C	chrII	-	TATA-less	TAF1-enriched	689	426829	426912	-83	YBR090C	1043.5	0.018160133	0.067716908	0.009573739	0.591475017	0.655789615	0.646950245	0.591475017	0.564993935	0.655789615	1	TRUE
286	288	orphan	chrII	+	TATA-containing	TAF1-enriched	186	427187	427132	-55	orphan	18.7	0.268613807	NA	NA	NA	NA	NA	NA	NA	NA	NA	NA
287	289	YBR091C	chrII	-	TATA-less	TAF1-enriched	185	427758	427773	-15	YBR091C	40.6	0.630512749	NA	NA	NA	NA	NA	NA	NA	NA	NA	NA
288	290	YBR092C	chrII	-	TATA-containing	TAF1-depleted	5564	428988	429115	-127	YBR092C	2034.6	0.002015731	0.079314059	0.435474593	0.599560076	0.823946688	0.007958672	0.504506991	0.77395172	0.823946688	1	TRUE
289	291	CUT025	chrII	+	TATA-less	TAF1-enriched	54	429611	429582	-29	CUT025	74.4	0.067519584	NA	NA	NA	NA	NA	NA	NA	NA	NA	NA
290	292	YBR093C	chrII	-	TATA-containing	TAF1-depleted	1264	430895	430986	-91	YBR093C	4984.7	0.004584818	0.118122137	0.018305636	0.866717722	0.10002648	0.828468298	0.034460064	0.030260447	0.866717722	3	TRUE
291	293	orphan	chrII	+	TATA-less	TAF1-enriched	52	431656	431498	-158	orphan	46.7	0.30518585	NA	NA	NA	NA	NA	NA	NA	NA	NA	NA
292	294	YBR095C	chrII	-	TATA-less	TAF1-enriched	260	435699	435727	-28	YBR095C	804.4	0.003431406	0.062451257	0.062451257	0.97415686	0.011509768	0.143256113	0.013815	0.645485506	0.256864472	2	TRUE
293	295	YBR096W	chrII	+	TATA-less	TAF1-enriched	168	435992	435939	-53	YBR096W	490.1	0.000290697	0.404290514	0.160139336	0.037931352	0.146915549	0.015045518	0.057526311	0.527976048	0.214180517	2	TRUE
294	296	YBR097W	chrII	+	TATA-less	TAF1-enriched	189	436952	436920	-32	YBR097W	299.1	0.002173153	0.010012659	0.065518368	0.160796121	0.426315208	0.005720638	0.426315208	0.391113249	0.749085534	2	TRUE
295	297	YBR101C	chrII	-	TATA-less	TAF1-enriched	792	444698	444755	-57	YBR101C	3526.5	0.005201242	0.747878398	0.011013086	0.689057907	0.120537976	0.247224072	0.070512366	0.917713666	0.361608047	1	TRUE
296	298	orphan	chrII	+	TATA-less	TAF1-depleted	15	445185	445030	-155	orphan	201.1	0.022246734	0.663373164	0.061259019	0.03190337	0.209266623	0.498338172	0.131073996	0.38881281	0.474481509	1	TRUE
297	299	YBR102C	chrII	-	TATA-less	TAF1-depleted	223	447336	447401	-65	YBR102C	407.8	0.003883379	0.164639843	0.017850945	0.516536205	0.516536205	0.955476688	0.828807439	0.780127076	0.279627455	1	TRUE
298	300	YBR103W	chrII	+	TATA-less	TAF1-enriched	203	447597	447549	-48	YBR103W	376.7	0.01197674	0.114708215	0.36071914	0.155286656	0.582962395	0.069710269	0.146112347	0.465582695	0.674579324	0	FALSE
299	301	orphan	chrII	-	TATA-less	TAF1-enriched	30	449266	449306	-40	orphan	8.1	0.100862352	NA	NA	NA	NA	NA	NA	NA	NA	NA	NA
300	302	YBR104W	chrII	+	TATA-less	TAF1-depleted	199	NA	449576	NA	YBR104W	823.6	0.159359595	NA	NA	NA	NA	NA	NA	NA	NA	NA	NA
301	303	YBR105C	chrII	-	TATA-containing	TAF1-depleted	4665	451889	451998	-109	YBR105C	4488.2	0.025219389	0.095359602	0.59190891	0.762823814	0.047487549	0.18811342	0.285319566	0.907792111	0.448142856	1	TRUE
302	304	YBR106W	chrII	+	TATA-less	TAF1-enriched	85013	452665	452619	-46	YBR106W	12657.8	0.549571432	NA	NA	NA	NA	NA	NA	NA	NA	NA	NA
303	305	YBR107C	chrII	-	TATA-less	TAF1-enriched	108	454539	454573	-34	YBR107C	216.9	0.103738153	NA	NA	NA	NA	NA	NA	NA	NA	NA	NA
304	306	YBR108W	chrII	+	TATA-less	TAF1-enriched	135	454828	454776	-52	YBR108W	782.9	0.003194225	0.167617545	0.538584256	0.035456883	0.035456883	0.021971549	0.21176874	0.71839981	0.293005674	3	TRUE
305	307	YBR109C	chrII	-	TATA-less	TAF1-enriched	1280	458381	458409	-28	YBR109C	2312.7	0.001895624	0.138237869	0.176507673	0.010857582	0.091497126	0.03790727	0.949224048	0.711416365	0.372641005	2	TRUE
306	308	YBR110W	chrII	+	TATA-less	TAF1-enriched	138	458852	458718	-134	YBR110W	327	0.092768639	NA	NA	NA	NA	NA	NA	NA	NA	NA	NA
307	309	YBR111C	chrII	-	TATA-containing	TAF1-depleted	2304	461707	461865	-158	YBR111C	5565.7	0.002402815	0.706232811	0.271067576	0.051311318	0.620265116	0.002138123	0.620265116	0.522396907	0.015895334	2	TRUE
308	310	YBR111W-A	chrII	+	TATA-less	TAF1-enriched	768	462139	462120	-19	YBR111W-A	1682.3	0.005435416	0.859021654	0.022640163	0.046111693	0.355371787	0.0127388	0.390140579	0.690835885	0.108444473	3	TRUE
309	311	YBR112C	chrII	-	TATA-less	TAF1-enriched	5587	465906	465945	-39	YBR112C	4334.1	0.019268373	0.02649734	0.23977615	0.095708985	0.398064083	0.02688605	0.163808546	0.795047728	0.556844845	2	TRUE
310	312	YBR114W	chrII	+	TATA-containing	TAF1-enriched	1310	467222	467160	-62	YBR114W	600.8	0.000592715	0.209700139	0.152883088	0.162088152	0.719215804	0.028031713	0.082985017	0.307222443	0.09818189	1	TRUE
311	313	YBR115C	chrII	-	TATA-containing	TAF1-depleted	24559	473844	473973	-129	YBR115C	5821.4	0.0004995	0.343756873	0.351231829	0.101948788	0.105334875	0.038434024	0.153276916	0.130019827	0.037320252	2	TRUE
312	314	ST0169	chrII	+	TATA-containing	TAF1-enriched	231	474364	474344	-20	ST0169	99.4	0.291106495	NA	NA	NA	NA	NA	NA	NA	NA	NA	NA
313	315	orphan	chrII	+	TATA-less	TAF1-enriched	9	477203	477193	-10	orphan	0.7	0.151224421	NA	NA	NA	NA	NA	NA	NA	NA	NA	NA
314	316	YBR118W	chrII	+	TATA-containing	TAF1-depleted	15587	477692	477649	-43	YBR118W	361033	0.000638139	0.090052897	0.069982568	0.12832387	0.575292264	0.040762536	0.575292264	0.820169969	0.12832387	1	TRUE
315	317	YBR119W	chrII	+	TATA-less	TAF1-enriched	913	479334	479298	-36	YBR119W	420.7	0.010118127	0.611754122	0.72780354	0.756727855	0.86752356	0.300340686	0.01911853	0.975458183	0.195415536	1	TRUE
316	318	YBR120C	chrII	-	TATA-less	TAF1-enriched	314	480946	480993	-47	YBR120C	70.5	0.859280442	NA	NA	NA	NA	NA	NA	NA	NA	NA	NA
317	319	YBR121C	chrII	-	TATA-less	TAF1-enriched	2120	483297	483434	-137	YBR121C	7702.7	0.004755716	0.07973753	0.530085427	0.074506593	0.118865329	0.053510827	0.287466545	0.71781907	0.025657174	1	TRUE
318	320	YBR122C	chrII	-	TATA-less	TAF1-enriched	282	484499	484536	-37	YBR122C	557.3	0.107209486	NA	NA	NA	NA	NA	NA	NA	NA	NA	NA
319	321	YBR123C	chrII	-	TATA-less	TAF1-enriched	788	486696	486728	-32	YBR123C	183.1	0.005704091	0.748818457	0.580216316	0.503093139	0.055718484	0.21683597	0.023574727	0.080193831	0.565988572	1	TRUE
320	322	YBR125C	chrII	-	TATA-containing	TAF1-depleted	381	488948	488958	-10	YBR125C	106.6	0.398598655	NA	NA	NA	NA	NA	NA	NA	NA	NA	NA
321	323	YBR126C	chrII	-	TATA-containing	TAF1-depleted	2955	490316	490463	-147	YBR126C	5934.2	0.002071553	0.04335444	0.137411589	0.022234804	0.264983769	0.924682909	0.264983769	0.15013433	0.489191521	2	TRUE
322	324	YBR126W-A	chrII	+	TATA-less	TAF1-enriched	18563	490845	490827	-18	YBR126W-A	6583.7	0.46491383	NA	NA	NA	NA	NA	NA	NA	NA	NA	NA
323	325	YBR127C	chrII	-	TATA-less	TAF1-enriched	4233	492820	492880	-60	YBR127C	28451.9	0.000351456	0.096623285	0.008144704	0.022903959	0.64910451	0.003313456	0.64910451	0.556927735	0.022903959	4	TRUE
324	326	CUT027	chrII	+	TATA-less	TAF1-enriched	233	493283	493130	-153	CUT027	85.2	0.048952314	0.159485279	0.264104674	0.561988823	0.639299678	0.090623174	0.369378631	0.719644121	0.224218974	0	FALSE
325	327	YBR131W	chrII	+	TATA-less	TAF1-enriched	136	497169	497148	-21	YBR131W	153.3	0.362748144	NA	NA	NA	NA	NA	NA	NA	NA	NA	NA
326	328	YBR132C	chrII	-	TATA-containing	TAF1-depleted	10754	501601	501594	7	YBR132C	382.3	0.095231507	NA	NA	NA	NA	NA	NA	NA	NA	NA	NA
327	329	YBR133C	chrII	-	TATA-containing	TAF1-enriched	514	504396	504416	-20	YBR133C	392.1	0.004651196	0.530880726	0.058150724	0.072493324	0.420123034	0.007153397	0.204377359	0.359064442	0.072493324	1	TRUE
328	330	YBR135W	chrII	+	TATA-containing	TAF1-enriched	535	504800	504760	-40	YBR135W	1258	0.002052231	0.112261375	0.576312155	0.717027021	0.102052327	0.447828487	0.102052327	0.090105157	0.397730411	0	FALSE
329	331	YBR136W	chrII	+	TATA-less	TAF1-enriched	506	505690	505650	-40	YBR136W	468.6	0.003000265	0.016275818	1	0.728383205	0.647711684	0.002728741	0.647711684	0.555250002	0.647711684	2	TRUE
330	332	YBR137W	chrII	+	TATA-less	TAF1-depleted	154	513115	512982	-133	YBR137W	228.6	0.075411014	NA	NA	NA	NA	NA	NA	NA	NA	NA	NA
331	333	YBR138C	chrII	-	TATA-less	TAF1-enriched	90	515358	515405	-47	YBR138C	352.6	0.023837657	0.133785845	0.827156214	0.453577416	0.082189794	0.076657469	0.039682352	0.387245781	0.64376911	1	TRUE
332	334	YBR139W	chrII	+	TATA-containing	TAF1-depleted	4465	515681	515650	-31	YBR139W	1040.9	0.312338736	NA	NA	NA	NA	NA	NA	NA	NA	NA	NA
333	335	YBR141W-A	chrII	+	TATA-less	TAF1-enriched	0	527056	526947	-109	YBR141W-A	0.6	0.551610573	NA	NA	NA	NA	NA	NA	NA	NA	NA	NA
334	336	YBR142W	chrII	+	TATA-less	TAF1-enriched	490	528296	528242	-54	YBR142W	1043.8	0.058818443	NA	NA	NA	NA	NA	NA	NA	NA	NA	NA
335	337	YBR143C	chrII	-	TATA-less	TAF1-enriched	929	NA	532218	NA	YBR143C	990.4	0.002233984	0.058111924	0.1088603	0.182452192	0.086079694	0.15794712	0.429314406	0.672607391	0.384190961	0	FALSE
336	338	ST0182	chrII	+	TATA-less	TAF1-enriched	35	532516	532507	-9	ST0182	68	0.005345319	0.04695557	0.658858984	0.232890261	0.165625566	0.039361524	0.38401157	0.505421459	0.232890261	2	TRUE
337	339	orphan	chrII	-	TATA-less	TAF1-enriched	340	533196	533274	-78	orphan	117.3	0.196256304	NA	NA	NA	NA	NA	NA	NA	NA	NA	NA
338	340	YBR145W	chrII	+	TATA-containing	TAF1-depleted	152	533720	533706	-14	YBR145W	688.6	0.004842048	0.0219651	0.052019146	0.848835054	0.373739735	0.163197806	0.042040375	0.821540393	0.525200118	2	TRUE
339	341	YBR146W	chrII	+	TATA-less	TAF1-enriched	294	535244	535232	-12	YBR146W	1861.9	0.000950659	0.026664376	0.418696291	0.033632709	0.389093398	0.013612619	0.967285925	0.589156635	0.102616767	3	TRUE
340	342	CUT455	chrII	-	TATA-less	TAF1-enriched	157	539685	539706	-21	CUT455	13.2	0.031322335	0.850430084	0.124154202	0.426909435	0.35673205	0.040231135	0.266014381	0.511542526	0.252595618	1	TRUE
341	343	YBR149W	chrII	+	TATA-containing	TAF1-depleted	2304	539961	539922	-39	YBR149W	2328	0.011073092	0.152598478	0.194392369	0.027452513	0.193464627	0.238679919	0.059843849	0.398324757	0.104487235	1	TRUE
342	344	YBR150C	chrII	-	TATA-less	TAF1-enriched	269	544473	544509	-36	YBR150C	120.3	0.038843891	0.391184571	0.120586057	0.105338783	0.476104496	0.112063532	0.721622674	0.675834354	0.195112119	0	FALSE
343	345	YBR151W	chrII	+	TATA-less	TAF1-enriched	63	544942	544909	-33	YBR151W	2615.7	0.001205153	0.294452305	0.210474822	0.207623807	0.146630142	0.019967143	0.042788088	0.564214409	0.620967272	2	TRUE
344	346	YBR152W	chrII	+	TATA-less	TAF1-enriched	128	546581	546396	-185	YBR152W	92.8	0.00620113	0.205951683	0.002158972	0.113066891	0.31957817	0.178097097	0.116733625	0.382242296	0.593691485	1	TRUE
345	347	YBR153W	chrII	+	TATA-less	TAF1-enriched	166	547574	547407	-167	YBR153W	114.4	0.891769413	NA	NA	NA	NA	NA	NA	NA	NA	NA	NA
346	348	YBR154C	chrII	-	TATA-containing	TAF1-depleted	537	549071	549122	-51	YBR154C	19017.2	0.004368924	0.472631917	0.084764178	0.363278319	1	0.010079537	0.058998351	1	0.462764585	1	TRUE
347	349	CUT456	chrII	-	TATA-less	TAF1-enriched	54	549491	549532	-41	CUT456	57.6	0.094892505	NA	NA	NA	NA	NA	NA	NA	NA	NA	NA
348	350	YBR156C	chrII	-	TATA-less	TAF1-enriched	95	553195	553241	-46	YBR156C	206.5	0.429273252	NA	NA	NA	NA	NA	NA	NA	NA	NA	NA
349	351	YBR157C	chrII	-	TATA-containing	TAF1-depleted	334	554285	554392	-107	YBR157C	132.6	0.005249465	0.351936771	0.432221695	0.07697517	0.714030321	0.000592564	0.257966268	0.869297661	0.043028435	2	TRUE
350	352	orphan	chrII	-	TATA-less	TAF1-enriched	142	554518	554622	-104	orphan	21.4	0.108321404	NA	NA	NA	NA	NA	NA	NA	NA	NA	NA
351	353	orphan	chrII	-	TATA-less	TAF1-enriched	188	555131	555145	-14	orphan	420.3	0.004977426	0.214654188	0.657644614	0.07506931	0.07506931	0.005119619	0.285509513	0.380254859	0.315718243	1	TRUE
352	354	orphan	chrII	+	TATA-less	TAF1-enriched	70	NA	555479	NA	orphan	96.3	0.184831152	NA	NA	NA	NA	NA	NA	NA	NA	NA	NA
353	355	YBR158W	chrII	+	TATA-containing	TAF1-depleted	618	556603	556286	-317	YBR158W	1271.5	0.001781962	0.111698407	0.161243927	0.548868351	0.233684709	0.032683401	0.854144153	0.909630479	0.030308358	2	TRUE
354	356	YBR159W	chrII	+	TATA-less	TAF1-enriched	400	558696	558644	-52	YBR159W	1145.2	0.030235902	0.856417249	0.027707952	0.973647176	0.868808707	0.023802562	0.530231216	0.638984491	0.07997661	2	TRUE
355	357	YBR160W	chrII	+	TATA-less	TAF1-enriched	443	560061	560000	-61	YBR160W	2902.5	0.002789146	0.055848508	0.346500634	0.777956886	0.080413504	0.154172115	0.032760129	0.958524378	0.600499814	1	TRUE
356	358	YBR161W	chrII	+	TATA-less	TAF1-enriched	394	561398	561365	-33	YBR161W	172	0.056313698	NA	NA	NA	NA	NA	NA	NA	NA	NA	NA
357	359	YBR162C	chrII	-	TATA-less	TAF1-depleted	29955	564669	564802	-133	YBR162C	2877.9	0.002181173	0.084465553	0.194392369	0.135111323	0.177381958	0.147224694	0.954912396	0.165490516	0.993555552	0	FALSE
358	360	YBR162W-A	chrII	+	TATA-less	TAF1-enriched	9195	565246	565178	-68	YBR162W-A	8012.6	0.31362517	NA	NA	NA	NA	NA	NA	NA	NA	NA	NA
359	361	YBR163W	chrII	+	TATA-less	TAF1-enriched	279	565668	565659	-9	YBR163W	464.1	0.27654296	NA	NA	NA	NA	NA	NA	NA	NA	NA	NA
360	362	YBR164C	chrII	-	TATA-containing	TAF1-depleted	118	568503	568561	-58	YBR164C	805	0.084213513	NA	NA	NA	NA	NA	NA	NA	NA	NA	NA
361	363	YBR165W	chrII	+	TATA-less	TAF1-enriched	47	568796	568761	-35	YBR165W	185.9	0.000584329	0.965129798	0.321722661	0.576356417	0.000598916	0.107952776	0.000598916	0.023394172	0.076407191	3	TRUE
362	364	YBR168W	chrII	+	TATA-less	TAF1-enriched	109	NA	572067	NA	YBR168W	109.6	0.07880454	NA	NA	NA	NA	NA	NA	NA	NA	NA	NA
363	365	CUT029	chrII	+	TATA-less	TAF1-enriched	2738	576569	576368	-201	CUT029	22	0.545006869	NA	NA	NA	NA	NA	NA	NA	NA	NA	NA
364	366	YBR172C	chrII	-	TATA-less	TAF1-enriched	4637	581443	581483	-40	YBR172C	297.4	0.044755766	0.564998374	0.051460452	0.935589236	0.662546587	0.296802605	0.02680639	0.786189685	0.324162267	1	TRUE
365	367	YBR173C	chrII	-	TATA-less	TAF1-enriched	8799	582159	582200	-41	YBR173C	8782.6	0.003109468	0.684520529	0.117579137	0.01061575	0.960557865	0.026879245	0.192821904	0.092717928	0.00590675	3	TRUE
366	368	YBR175W	chrII	+	TATA-less	TAF1-enriched	682	582434	582408	-26	YBR175W	691.8	0.001689897	0.038519575	0.025775396	0.228115484	0.33415511	0.00221069	0.288436385	0.085285297	0.429421325	3	TRUE
367	369	YBR176W	chrII	+	TATA-less	TAF1-enriched	2103	583643	583634	-9	YBR176W	132.2	0.01671043	0.485331204	0.062789849	0.120521629	0.58274659	0.629019388	0.275364201	0.658494999	0.059161483	0	FALSE
368	370	YBR179C	chrII	-	TATA-less	TAF1-enriched	1092	589156	589179	-23	YBR179C	1038.4	0.005722209	0.071625534	0.630944712	0.459276986	0.2299429	0.064735928	0.2299429	0.361282884	0.439564701	0	FALSE
369	371	YBR181C	chrII	-	TATA-less	TAF1-enriched	24358	592756	592803	-47	YBR181C	8781.4	0.002709171	0.76210738	0.13013419	0.465673931	0.353148162	0.34628134	0.028625371	0.086820714	0.465673931	1	TRUE
370	372	YBR183W	chrII	+	TATA-less	TAF1-depleted	32	596165	595979	-186	YBR183W	1151.7	0.175586628	NA	NA	NA	NA	NA	NA	NA	NA	NA	NA
371	373	YBR185C	chrII	-	TATA-less	TAF1-enriched	794	599957	599982	-25	YBR185C	209	0.748924573	NA	NA	NA	NA	NA	NA	NA	NA	NA	NA
372	374	ST3857	chrII	-	TATA-less	TAF1-enriched	28	602217	602309	-92	ST3857	101.8	0.018529184	0.694117877	0.080484829	0.188053004	0.518141138	0.327851466	0.193462259	0.085430019	0.358899799	0	FALSE
373	375	YBR187W	chrII	+	TATA-less	TAF1-depleted	482	602558	602520	-38	YBR187W	1555.7	0.001448816	0.824432251	0.859132662	0.189412131	0.66179224	0.090227655	0.017236764	0.05977599	0.189412131	1	TRUE
374	376	YBR189W	chrII	+	TATA-less	TAF1-enriched	10683	604525	604482	-43	YBR189W	53307	0.001253735	0.098916896	0.087036235	0.821237983	0.25857528	0.381512877	0.032842743	0.144697189	0.25857528	1	TRUE
375	377	YBR191W	chrII	+	TATA-less	TAF1-enriched	11552	606277	606203	-74	YBR191W	19524.8	0.024826931	0.23154827	0.16278173	0.13317633	0.820012195	0.052540591	0.578777381	0.052540591	0.13317633	0	FALSE
376	378	YBR192W	chrII	+	TATA-less	TAF1-enriched	201	607521	607489	-32	YBR192W	239.1	0.008687414	0.737010823	0.492568432	0.074529082	0.603195303	0.001638966	0.317486423	0.893232861	0.025668625	2	TRUE
377	379	orphan	chrII	+	TATA-less	TAF1-enriched	18	609566	609421	-145	orphan	9.1	0.893773007	NA	NA	NA	NA	NA	NA	NA	NA	NA	NA
378	380	YBR193C	chrII	-	TATA-less	TAF1-depleted	411	609725	609760	-35	YBR193C	566.5	0.071182881	NA	NA	NA	NA	NA	NA	NA	NA	NA	NA
379	381	YBR195C	chrII	-	TATA-less	TAF1-enriched	78	611861	611875	-14	YBR195C	761.2	0.000330185	0.195109403	0.404305353	0.020530354	0.769031241	0.001471994	0.37835737	0.255424689	0.020530354	3	TRUE
380	382	YBR196C	chrII	-	TATA-containing	TAF1-depleted	5647	613901	613973	-72	YBR196C	24915.9	0.340322881	NA	NA	NA	NA	NA	NA	NA	NA	NA	NA
381	383	CUT030	chrII	+	TATA-less	TAF1-enriched	1139	614716	614520	-196	CUT030	231.2	0.01254213	0.400029496	0.065366259	0.51974726	0.360745842	0.037271654	0.12120573	0.975445039	0.94297904	1	TRUE
382	384	orphan	chrII	-	TATA-less	TAF1-enriched	45	614716	614937	-221	orphan	90.5	0.836227267	NA	NA	NA	NA	NA	NA	NA	NA	NA	NA
383	385	ANT027	chrII	+	TATA-less	TAF1-enriched	110	615386	615406	20	ANT027	67.6	0.309827554	NA	NA	NA	NA	NA	NA	NA	NA	NA	NA
384	386	YBR197C	chrII	-	TATA-less	TAF1-enriched	196	615823	615867	-44	YBR197C	607.6	0.011872278	0.118515185	0.241688333	0.026435746	0.610247387	0.033776523	0.542938183	0.510508474	0.285173998	2	TRUE
385	387	YBR198C	chrII	-	TATA-less	TAF1-depleted	263	618530	618601	-71	YBR198C	707.7	0.002731947	0.175666281	0.133247598	0.04218266	0.333302807	0.007244702	0.54004892	0.133920935	0.106859465	2	TRUE
386	388	YBR199W	chrII	+	TATA-less	TAF1-enriched	2267	618866	618816	-50	YBR199W	3392.8	0.000598825	0.663009863	0.039150278	0.21163843	0.572164	0.007346187	0.282803171	0.382644262	0.073442248	2	TRUE
387	389	YBR200W	chrII	+	TATA-less	TAF1-enriched	342	620870	620809	-61	YBR200W	694.9	0.047263658	0.426216006	0.07702988	0.56118311	0.383411553	0.867601276	0.208023944	0.104080583	0.052751421	0	FALSE
388	390	YBR201W	chrII	+	TATA-less	TAF1-enriched	367	623478	623440	-38	YBR201W	1207.3	0.016285646	0.387114001	0.094703671	0.711882295	0.311709686	0.604274705	0.24110912	0.044340153	0.711882295	1	TRUE
389	391	YBR201C-A	chrII	-	TATA-containing	TAF1-enriched	223	624644	624765	-121	YBR201C-A	1024.1	0.016091098	0.138570806	0.988414386	0.093312877	0.090249664	0.147682513	0.063860725	0.254398531	0.879884753	0	FALSE
390	392	orphan	chrII	-	TATA-less	TAF1-enriched	95	624964	625063	-99	orphan	37.6	0.037995903	0.561859778	0.760714471	0.469789711	0.125271791	0.629833766	0.125271791	0.429764086	0.066527334	0	FALSE
391	393	CUT031	chrII	+	TATA-less	TAF1-enriched	14	625366	625338	-28	CUT031	10.3	0.40506586	NA	NA	NA	NA	NA	NA	NA	NA	NA	NA
392	394	YBR202W	chrII	+	TATA-less	TAF1-depleted	717	625739	625707	-32	YBR202W	2562.4	0.024028255	0.068434941	0.001255027	0.091952662	0.882935268	0.386489072	0.882935268	0.025160343	0.882935268	2	TRUE
393	395	YBR205W	chrII	+	TATA-less	TAF1-enriched	217	633639	633577	-62	YBR205W	2071.4	0.002214391	0.313459095	0.026384813	0.761086332	0.17375271	0.634664947	0.033305436	0.136884789	0.860269131	2	TRUE
394	396	orphan	chrII	-	TATA-less	TAF1-enriched	18	634978	635032	-54	orphan	2.9	0.048233326	0.506576324	0.13812324	0.84414408	0.149386897	0.86832702	0.038993743	0.507243724	0.149386897	1	TRUE
395	397	YBR207W	chrII	+	TATA-less	TAF1-enriched	442	635125	635061	-64	YBR207W	201.4	0.952757142	NA	NA	NA	NA	NA	NA	NA	NA	NA	NA
396	398	YBR208C	chrII	-	TATA-less	TAF1-depleted	101	642436	642596	-160	YBR208C	151.9	0.003438996	0.965239607	0.003669026	0.035683742	0.2792159	0.294766795	0.464170435	0.276238148	0.048471739	3	TRUE
397	399	YBR209W	chrII	+	TATA-less	TAF1-enriched	3	642779	642745	-34	YBR209W	1.3	0.414313766	NA	NA	NA	NA	NA	NA	NA	NA	NA	NA
398	400	tC(GCA)B	chrII	-	TATA-less	-	427	643074	643088	-14	tC(GCA)B	14.4	0.857022198	NA	NA	NA	NA	NA	NA	NA	NA	NA	NA
399	401	YBR210W	chrII	+	TATA-less	TAF1-enriched	320	645553	645516	-37	YBR210W	1745.7	0.018339035	0.792633201	0.267002538	0.671582304	0.252648939	0.426491257	0.126532771	0.860635008	0.400933504	0	FALSE
400	402	YBR211C	chrII	-	TATA-less	TAF1-enriched	281	647230	647229	1	YBR211C	269.1	0.016074758	0.176278326	0.176278326	0.246319187	0.318125545	0.279720464	0.071323564	0.851592367	0.519526382	0	FALSE
401	403	YBR212W	chrII	+	TATA-less	TAF1-enriched	763	NA	647480	NA	YBR212W	538.7	0.147354882	NA	NA	NA	NA	NA	NA	NA	NA	NA	NA
402	404	YBR214W	chrII	+	TATA-less	TAF1-enriched	9974	651359	651352	-7	YBR214W	1259.6	0.002044805	0.243406746	0.474924396	0.725281324	0.00661887	0.934261057	0.015185749	0.019795537	0.823049821	3	TRUE
403	405	YBR215W	chrII	+	TATA-less	TAF1-depleted	100	653354	653315	-39	YBR215W	89.3	0.563381685	NA	NA	NA	NA	NA	NA	NA	NA	NA	NA
404	406	YBR217W	chrII	+	TATA-less	TAF1-enriched	843	657811	657785	-26	YBR217W	178.4	0.702302124	NA	NA	NA	NA	NA	NA	NA	NA	NA	NA
405	407	YBR218C	chrII	-	TATA-less	TAF1-depleted	4976	662203	662396	-193	YBR218C	2136.5	0.150618042	NA	NA	NA	NA	NA	NA	NA	NA	NA	NA
406	408	CUT033	chrII	+	TATA-less	TAF1-enriched	2	662944	662845	-99	CUT033	11.4	0.157475758	NA	NA	NA	NA	NA	NA	NA	NA	NA	NA
407	409	YBR220C	chrII	-	TATA-less	TAF1-enriched	324	664696	664744	-48	YBR220C	751.2	0.003230138	0.413818846	0.589245118	0.447666019	0.660225676	0.009038172	0.227468257	0.556424605	0.007069364	2	TRUE
408	410	YBR221C	chrII	-	TATA-less	TAF1-enriched	34554	666416	666456	-40	YBR221C	17937.7	0.002886687	0.649858596	0.14308941	0.688392352	0.069879571	0.373192932	0.069879571	0.012215765	0.490329478	1	TRUE
409	411	YBR222C	chrII	-	TATA-containing	TAF1-depleted	788	668364	668388	-24	YBR222C	375	0.00462177	0.88363413	0.474265053	0.027171799	1	0.001006019	1	1	0.003481997	3	TRUE
410	412	YBR228W	chrII	+	TATA-less	TAF1-enriched	215	675373	675313	-60	YBR228W	164.9	0.087706701	NA	NA	NA	NA	NA	NA	NA	NA	NA	NA
411	413	YBR229C	chrII	-	TATA-less	TAF1-enriched	1454	679210	679230	-20	YBR229C	582.7	0.001459901	0.009296245	0.303814494	0.281597678	0.398208783	0.164510119	0.803764729	0.881002128	0.398208783	1	TRUE
412	414	YBR230C	chrII	-	TATA-containing	TAF1-enriched	9978	680061	680076	-15	YBR230C	629.6	0.002623176	0.662059756	0.512077206	0.237599134	0.084773791	0.180491732	0.013980051	0.0100105	0.544206615	2	TRUE
413	415	orphan	chrII	+	TATA-less	TAF1-enriched	42	680949	680940	-9	orphan	1.2	0.257725763	NA	NA	NA	NA	NA	NA	NA	NA	NA	NA
414	416	orphan	chrII	-	TATA-containing	TAF1-depleted	258364	681841	681862	-21	orphan	120524.9	0.078839019	NA	NA	NA	NA	NA	NA	NA	NA	NA	NA
415	417	CUT034	chrII	+	TATA-less	TAF1-enriched	22	682256	682194	-62	CUT034	2.5	0.086856232	NA	NA	NA	NA	NA	NA	NA	NA	NA	NA
416	418	YBR231C	chrII	-	TATA-less	TAF1-enriched	175	683098	683144	-46	YBR231C	187.4	0.824411075	NA	NA	NA	NA	NA	NA	NA	NA	NA	NA
417	419	YBR233W-A	chrII	+	TATA-less	TAF1-enriched	475	684985	684944	-41	YBR233W-A	694.6	0.004234279	0.307321957	0.559659632	0.318048491	0.707342885	0.081374699	0.438447481	0.451574965	0.171965498	0	FALSE
418	420	YBR234C	chrII	-	TATA-less	TAF1-enriched	1828	686567	686629	-62	YBR234C	1507	0.142650582	NA	NA	NA	NA	NA	NA	NA	NA	NA	NA
419	421	YBR236C	chrII	-	TATA-less	TAF1-enriched	802	691698	691731	-33	YBR236C	341.3	0.00104365	0.658808643	0.556032474	0.524205679	0.019814759	0.116054239	0.019814759	0.256613238	0.524205679	2	TRUE
420	422	YBR237W	chrII	+	TATA-less	TAF1-enriched	83	691973	691932	-41	YBR237W	267.6	0.007075849	0.017373407	0.846747466	0.156519871	0.16626605	0.067373244	0.463640356	0.882993828	0.463640356	1	TRUE
421	423	YBR238C	chrII	-	TATA-less	TAF1-enriched	8079	697228	697302	-74	YBR238C	8780.1	0.00281359	0.659411276	0.056157264	0.562353341	0.007552542	0.371659464	0.015780349	0.140186181	0.31839155	2	TRUE
422	424	ST0237	chrII	+	TATA-less	TAF1-enriched	58	697917	697874	-43	ST0237	128.7	0.255032338	NA	NA	NA	NA	NA	NA	NA	NA	NA	NA
423	425	orphan	chrII	+	TATA-less	TAF1-enriched	39	697917	697901	-16	orphan	151.3	0.01324664	0.017689926	0.077696861	0.133038698	0.287447152	0.59290162	0.350398664	0.68265763	0.839132264	1	TRUE
424	426	YBR242W	chrII	+	TATA-containing	TAF1-enriched	3479	704553	704511	-42	YBR242W	1101.2	0.002985372	0.652179436	0.10973447	0.085398599	0.278772824	0.104282337	0.425809745	0.323642454	0.085398599	0	FALSE
425	427	YBR243C	chrII	-	TATA-less	TAF1-enriched	80	706771	706846	-75	YBR243C	673.1	0.076471477	NA	NA	NA	NA	NA	NA	NA	NA	NA	NA
426	428	orphan	chrII	+	TATA-less	TAF1-enriched	440	707524	707449	-75	orphan	970.7	0.006215063	0.814209808	0.064225091	0.053518847	0.071545942	0.000609754	0.747615499	0.067570527	0.209492587	1	TRUE
427	429	YBR244W	chrII	+	TATA-containing	TAF1-depleted	1257	707524	707475	-49	YBR244W	977.1	0.009633245	0.837623931	0.057046324	0.148971681	0.067546638	0.000925559	0.72425662	0.062444173	0.235381847	1	TRUE
428	430	YBR246W	chrII	+	TATA-less	TAF1-depleted	87	711612	711548	-64	YBR246W	689.2	0.003827563	0.672706151	0.08832237	0.030603569	0.172462587	0.000410881	0.477647229	0.359287006	0.030603569	3	TRUE
429	431	YBR247C	chrII	-	TATA-less	TAF1-depleted	89	714449	714476	-27	YBR247C	1020	0.037987387	0.190434529	0.238651017	0.873383454	0.191290596	0.537097894	0.372163153	0.398939438	0.355329501	0	FALSE
430	432	CUT037	chrII	+	TATA-less	TAF1-enriched	133	714730	714714	-16	CUT037	31.1	0.835041113	NA	NA	NA	NA	NA	NA	NA	NA	NA	NA
431	433	YBR248C	chrII	-	TATA-less	TAF1-depleted	285	716497	716561	-64	YBR248C	500.3	0.062682879	NA	NA	NA	NA	NA	NA	NA	NA	NA	NA
432	434	YBR249C	chrII	-	TATA-less	TAF1-enriched	2455	717939	718084	-145	YBR249C	6922.7	0.000297212	0.00687796	0.06008949	0.903945387	0.067809039	0.102961585	0.03718546	0.201416861	0.717324647	2	TRUE
433	435	orphan	chrII	+	TATA-less	TAF1-enriched	96	718452	718405	-47	orphan	26.9	0.728839194	NA	NA	NA	NA	NA	NA	NA	NA	NA	NA
434	436	YBR251W	chrII	+	TATA-less	TAF1-enriched	101	721378	721354	-24	YBR251W	657.7	0.011861234	0.746375989	0.096250202	0.114695083	0.819834196	0.051254761	0.819834196	0.377720648	0.047441177	1	TRUE
435	437	YBR252W	chrII	+	TATA-containing	TAF1-enriched	4425	722635	722593	-42	YBR252W	2705.2	0.005008268	0.017382418	0.634285645	0.278841455	0.11607504	0.162097778	0.062239435	0.006077999	0.714064088	2	TRUE
436	439	YBR255C-A	chrII	-	TATA-less	TAF1-enriched	8070	727067	727111	-44	YBR255C-A	277.1	0.071280122	NA	NA	NA	NA	NA	NA	NA	NA	NA	NA
437	440	YBR256C	chrII	-	TATA-containing	TAF1-enriched	765	728094	728110	-16	YBR256C	12755.6	0.001860981	0.210616537	0.790930664	0.686697907	0.529211026	0.021956224	0.392506079	0.05533798	0.529211026	1	TRUE
438	441	YBR257W	chrII	+	TATA-less	TAF1-enriched	480	728886	728854	-32	YBR257W	284.2	0.064002704	NA	NA	NA	NA	NA	NA	NA	NA	NA	NA
439	442	YBR258C	chrII	-	TATA-less	TAF1-enriched	46	730139	730200	-61	YBR258C	307.2	0.015884823	0.113194697	0.295418351	0.690647032	0.115028224	0.095979097	0.034239619	0.636439083	0.258368751	1	TRUE
440	443	YBR261C	chrII	-	TATA-less	TAF1-enriched	503	735510	735567	-57	YBR261C	948.2	0.017133756	0.033649848	0.16593761	0.69814044	0.601162196	0.556689945	0.932808943	0.760543533	0.601162196	1	TRUE
441	444	YBR262C	chrII	-	TATA-containing	TAF1-enriched	180	736030	736079	-49	YBR262C	1662	0.010184225	0.292396568	0.169258064	0.580498385	0.879044274	0.073636957	0.625138566	0.251064644	0.041109134	1	TRUE
442	445	YBR264C	chrII	-	TATA-less	TAF1-enriched	260	738322	738372	-50	YBR264C	259.7	0.723699106	NA	NA	NA	NA	NA	NA	NA	NA	NA	NA
443	446	YBR265W	chrII	+	TATA-less	TAF1-enriched	63	738750	738593	-157	YBR265W	1858.1	0.002827444	0.011289773	0.00218481	0.668936418	0.053821452	0.624456114	0.199553567	0.68458247	0.890906432	2	TRUE
444	447	YBR267W	chrII	+	TATA-less	TAF1-enriched	284	739869	739824	-45	YBR267W	368.9	0.775109303	NA	NA	NA	NA	NA	NA	NA	NA	NA	NA
445	448	YBR268W	chrII	+	TATA-less	TAF1-enriched	280	741337	741285	-52	YBR268W	1031.7	0.005214288	0.625832986	0.66828915	0.066192819	0.281761033	0.012521975	0.118299065	0.497059989	0.042219687	2	TRUE
446	449	YBR269C	chrII	-	TATA-less	TAF1-enriched	335	742398	742553	-155	YBR269C	3234.6	0.026968385	0.248748607	0.784720758	0.012348588	0.566270015	0.599006408	0.96684799	0.691326741	0.005639819	2	TRUE
447	450	YBR271W	chrII	+	TATA-less	TAF1-enriched	1296	744879	744826	-53	YBR271W	207	0.157960229	NA	NA	NA	NA	NA	NA	NA	NA	NA	NA
448	451	YBR272C	chrII	-	TATA-containing	TAF1-enriched	48	747786	747818	-32	YBR272C	135.8	0.569126714	NA	NA	NA	NA	NA	NA	NA	NA	NA	NA
449	452	YBR275C	chrII	-	TATA-less	TAF1-enriched	52	NA	757215	NA	YBR275C	119.4	0.00756071	0.149992021	0.167157349	0.923859513	0.750046923	0.188139917	0.191495527	0.01211356	0.823532202	1	TRUE
450	453	orphan	chrII	-	TATA-less	TAF1-enriched	15	760848	760897	-49	orphan	43.4	0.067827093	NA	NA	NA	NA	NA	NA	NA	NA	NA	NA
451	454	YBR279W	chrII	+	TATA-less	TAF1-enriched	1353	761287	761229	-58	YBR279W	343.1	0.008194868	0.038047261	0.01520642	0.572717466	0.26614162	0.662173534	0.910180575	0.349147146	0.055138509	2	TRUE
452	455	orphan	chrII	-	TATA-containing	TAF1-enriched	358	764691	764710	-19	orphan	319.6	0.070500594	NA	NA	NA	NA	NA	NA	NA	NA	NA	NA
453	456	YBR281C	chrII	-	TATA-less	TAF1-enriched	310	767616	767659	-43	YBR281C	383.5	0.003839	0.110453399	0.811355344	0.020316834	0.743801616	0.000584505	0.743801616	0.783890582	0.077589778	2	TRUE
454	457	YBR282W	chrII	+	TATA-less	TAF1-depleted	986	768243	768197	-46	YBR282W	1355.3	0.001019621	0.060371662	0.325238117	0.482615579	0.175347454	0.364719022	0.259899487	0.0215821	0.482615579	1	TRUE
455	458	YBR283C	chrII	-	TATA-less	TAF1-depleted	10014	770561	770559	2	YBR283C	19767	0.000153092	0.011386608	0.278123274	0.031944272	0.165725742	0.008787712	0.290944091	1	0.098926062	3	TRUE
456	459	orphan	chrII	+	TATA-less	TAF1-depleted	41	770892	770874	-18	orphan	59.6	0.14254957	NA	NA	NA	NA	NA	NA	NA	NA	NA	NA
457	460	YBR284W	chrII	+	TATA-less	TAF1-enriched	519	771277	771244	-33	YBR284W	1029.5	0.044874647	0.079765912	0.149799188	0.087668795	0.987022979	0.599617493	0.033112615	0.323688117	0.22251223	1	TRUE
458	461	YBR286W	chrII	+	TATA-containing	TAF1-depleted	2715	774727	774687	-40	YBR286W	3335.8	0.002458427	0.080578249	0.988382276	0.003602149	0.210514916	0.002923856	0.384667953	0.000654225	0.017849838	4	TRUE
459	462	YBR287W	chrII	+	TATA-containing	TAF1-depleted	3536	776560	776538	-22	YBR287W	2865	0.008306709	0.285936046	0.432166976	0.052368301	0.76391078	0.729470203	0.358994464	0.97491934	0.839182966	0	FALSE
460	463	YBR289W	chrII	+	TATA-less	TAF1-enriched	92	779717	779653	-64	YBR289W	2064.3	0.001940291	0.817765452	0.120783247	0.919578269	1	0.001119514	0.157505953	0.648240235	0.026335434	2	TRUE
461	464	YBR290W	chrII	+	TATA-containing	TAF1-enriched	1327	782628	782584	-44	YBR290W	4185	0.001313285	0.140874768	0.110655659	0.827087065	0.305371163	0.185753088	0.512263638	0.078900915	0.067021896	0	FALSE
462	465	YBR291C	chrII	-	TATA-less	TAF1-enriched	112	784580	784608	-28	YBR291C	184.6	0.403816482	NA	NA	NA	NA	NA	NA	NA	NA	NA	NA
463	466	CUT039	chrII	+	TATA-containing	TAF1-enriched	4	784875	784790	-85	CUT039	2.8	0.359522132	NA	NA	NA	NA	NA	NA	NA	NA	NA	NA
464	467	ST0269	chrII	+	TATA-less	TAF1-enriched	21	785471	785441	-30	ST0269	40.9	0.390494354	NA	NA	NA	NA	NA	NA	NA	NA	NA	NA
465	468	orphan	chrII	+	TATA-less	TAF1-enriched	31	786030	785970	-60	orphan	53.8	0.288514603	NA	NA	NA	NA	NA	NA	NA	NA	NA	NA
466	469	orphan	chrII	-	TATA-containing	TAF1-enriched	396	786468	786561	-93	orphan	116.6	0.409217974	NA	NA	NA	NA	NA	NA	NA	NA	NA	NA
467	470	ST3913	chrII	-	TATA-less	TAF1-enriched	455	786824	786870	-46	ST3913	142.8	0.008721875	0.069613051	0.491626727	0.087805317	0.63631597	0.425628365	0.18075868	0.315557768	0.170536884	0	FALSE
468	471	YBR293W	chrII	+	TATA-less	TAF1-enriched	264	787110	787097	-13	YBR293W	122.2	0.149807832	NA	NA	NA	NA	NA	NA	NA	NA	NA	NA
469	472	orphan	chrII	-	TATA-less	TAF1-enriched	49	792040	792057	-17	orphan	251.4	0.007519835	0.793600888	0.222095388	0.00783497	0.81122863	0.013634836	0.197139864	0.376741521	0.010360375	3	TRUE
470	473	ST3914	chrII	-	TATA-less	TAF1-enriched	55	NA	792560	NA	ST3914	49	0.04860173	0.520401532	0.027403558	0.614225311	0.591920828	0.211369004	0.516942271	0.488910017	0.516942271	1	TRUE
471	474	YBR295W	chrII	+	TATA-containing	TAF1-enriched	309	792850	792833	-17	YBR295W	177	0.062528664	NA	NA	NA	NA	NA	NA	NA	NA	NA	NA
472	475	YBR296C	chrII	-	TATA-containing	TAF1-depleted	632	798482	798590	-108	YBR296C	1130.3	0.001885665	0.746178666	0.024381585	0.226746602	0.252493587	0.023330941	0.550953149	0.505522	0.027241358	3	TRUE
473	476	YBR297W	chrII	+	TATA-less	TAF1-enriched	126	800510	800487	-23	YBR297W	200.1	0.094337185	NA	NA	NA	NA	NA	NA	NA	NA	NA	NA
474	477	YBR298C	chrII	-	TATA-containing	TAF1-enriched	197	804871	804888	-17	YBR298C	100.2	0.000550308	0.127745858	0.147507459	0.029593586	0.566985472	0.012710128	0.52352252	0.568572396	0.092031756	2	TRUE
475	478	orphan	chrII	-	TATA-containing	TAF1-enriched	29	NA	807161	NA	orphan	0.4	0.728341487	NA	NA	NA	NA	NA	NA	NA	NA	NA	NA
476	479	orphan	chrII	+	TATA-containing	TAF1-enriched	9	NA	807368	NA	orphan	0.3	0.853816744	NA	NA	NA	NA	NA	NA	NA	NA	NA	NA
477	480	YCL064C	chrIII	-	TATA-containing	TAF1-depleted	5685	NA	16894	NA	YCL064C	402.8	0.012029955	0.108231416	0.320749149	0.189646744	0.654245649	0.015689882	0.102777829	0.71011616	0.023125778	2	TRUE
478	481	YCL063W	chrIII	+	TATA-less	TAF1-enriched	934	17319	17274	-45	YCL063W	666	0.305192172	NA	NA	NA	NA	NA	NA	NA	NA	NA	NA
479	482	YCL061C	chrIII	-	TATA-less	TAF1-enriched	892	22110	22144	-34	YCL061C	28.3	0.539439144	NA	NA	NA	NA	NA	NA	NA	NA	NA	NA
480	483	orphan	chrIII	-	TATA-containing	TAF1-enriched	58	22480	22525	-45	orphan	103.6	0.838835651	NA	NA	NA	NA	NA	NA	NA	NA	NA	NA
481	484	YCL059C	chrIII	-	TATA-less	TAF1-depleted	615	23344	23404	-60	YCL059C	42.7	0.009167461	0.642702796	0.303324856	0.662302523	0.025659542	0.372463961	0.059844587	0.179295641	0.662302523	1	TRUE
482	485	YCL058W-A	chrIII	+	TATA-less	TAF1-enriched	159	23624	23562	-62	YCL058W-A	10.1	0.396296369	NA	NA	NA	NA	NA	NA	NA	NA	NA	NA
483	486	YCL057C-A	chrIII	-	TATA-less	TAF1-enriched	7479	24311	24352	-41	YCL057C-A	366.4	0.170895937	NA	NA	NA	NA	NA	NA	NA	NA	NA	NA
484	487	YCL057W	chrIII	+	TATA-less	TAF1-enriched	24403	24805	24782	-23	YCL057W	0.6	0.165177821	NA	NA	NA	NA	NA	NA	NA	NA	NA	NA
485	488	YCL056C	chrIII	-	TATA-less	TAF1-depleted	26	27313	27540	-227	YCL056C	0.3	0.623387628	NA	NA	NA	NA	NA	NA	NA	NA	NA	NA
486	489	YCL055W	chrIII	+	TATA-less	TAF1-depleted	503	27956	27934	-22	YCL055W	21.6	0.193247283	NA	NA	NA	NA	NA	NA	NA	NA	NA	NA
487	490	CUT460	chrIII	-	TATA-containing	TAF1-enriched	9	28914	28961	-47	CUT460	76.3	0.680851813	NA	NA	NA	NA	NA	NA	NA	NA	NA	NA
488	492	orphan	chrIII	+	TATA-less	TAF1-enriched	51	NA	29618	NA	orphan	8.7	0.341639351	NA	NA	NA	NA	NA	NA	NA	NA	NA	NA
489	493	CUT461	chrIII	-	TATA-less	TAF1-depleted	1	30274	30388	-114	CUT461	22.9	0.100176666	NA	NA	NA	NA	NA	NA	NA	NA	NA	NA
490	494	CUT462	chrIII	-	TATA-containing	TAF1-enriched	104	31141	31197	-56	CUT462	0.7	0.434958366	NA	NA	NA	NA	NA	NA	NA	NA	NA	NA
491	495	YCL054W	chrIII	+	TATA-less	TAF1-enriched	288	31445	31418	-27	YCL054W	7.2	0.608074819	NA	NA	NA	NA	NA	NA	NA	NA	NA	NA
492	496	YCL051W	chrIII	+	TATA-less	TAF1-enriched	352	35623	35580	-43	YCL051W	21.1	0.960905002	NA	NA	NA	NA	NA	NA	NA	NA	NA	NA
493	497	YCL050C	chrIII	-	TATA-less	TAF1-enriched	4710	38819	38863	-44	YCL050C	1.5	0.028286235	0.104825918	0.030125784	0.413964919	1	1	0.298419845	0.43215137	1	1	TRUE
494	498	CUT040	chrIII	+	TATA-less	TAF1-enriched	326	39226	39137	-89	CUT040	2.5	0.289558915	NA	NA	NA	NA	NA	NA	NA	NA	NA	NA
495	499	YCL049C	chrIII	-	TATA-less	TAF1-enriched	718	40733	40779	-46	YCL049C	35.9	0.577649071	NA	NA	NA	NA	NA	NA	NA	NA	NA	NA
496	500	YCL047C	chrIII	-	TATA-less	TAF1-enriched	605	44419	44448	-29	YCL047C	0.3	0.445116039	NA	NA	NA	NA	NA	NA	NA	NA	NA	NA
497	501	YCL045C	chrIII	-	TATA-containing	TAF1-enriched	5901	46894	46954	-60	YCL045C	3.6	0.47336883	NA	NA	NA	NA	NA	NA	NA	NA	NA	NA
498	502	YCL044C	chrIII	-	TATA-less	TAF1-enriched	3284	48385	48413	-28	YCL044C	0	NA	NA	NA	NA	NA	NA	NA	NA	NA	NA	NA
499	503	YCL043C	chrIII	-	TATA-containing	TAF1-enriched	29465	50242	50258	-16	YCL043C	44.3	0.470864134	NA	NA	NA	NA	NA	NA	NA	NA	NA	NA
500	504	YCL040W	chrIII	+	TATA-containing	TAF1-depleted	31364	50921	50803	-118	YCL040W	0.1	0.391625176	NA	NA	NA	NA	NA	NA	NA	NA	NA	NA
501	505	YCL039W	chrIII	+	TATA-less	TAF1-enriched	403	52669	52611	-58	YCL039W	4.3	0.467246663	NA	NA	NA	NA	NA	NA	NA	NA	NA	NA
502	506	YCL038C	chrIII	-	TATA-less	TAF1-enriched	242	NA	56595	NA	YCL038C	0.6	0.153421566	NA	NA	NA	NA	NA	NA	NA	NA	NA	NA
503	507	YCL037C	chrIII	-	TATA-less	TAF1-enriched	26597	58698	58745	-47	YCL037C	2493.3	0.003421528	0.034996902	0.327106907	0.286714145	0.150022328	0.535625368	0.294135512	0.090962713	0.993511275	1	TRUE
504	508	YCL036W	chrIII	+	TATA-less	TAF1-enriched	40	59031	59018	-13	YCL036W	86.8	0.000736935	0.04307111	0.594467251	0.313416634	0.510430731	0.010152792	0.196585594	0.395497383	0.065591995	2	TRUE
505	509	YCL035C	chrIII	-	TATA-containing	TAF1-depleted	6818	61173	61237	-64	YCL035C	6.6	0.683290836	NA	NA	NA	NA	NA	NA	NA	NA	NA	NA
506	510	YCL034W	chrIII	+	TATA-containing	TAF1-enriched	2288	61670	61608	-62	YCL034W	0	NA	NA	NA	NA	NA	NA	NA	NA	NA	NA	NA
507	511	YCL032W	chrIII	+	TATA-less	TAF1-enriched	201	63457	63388	-69	YCL032W	0	NA	NA	NA	NA	NA	NA	NA	NA	NA	NA	NA
508	512	YCL031C	chrIII	-	TATA-less	TAF1-enriched	841	65573	65601	-28	YCL031C	39.5	0.343562702	NA	NA	NA	NA	NA	NA	NA	NA	NA	NA
509	513	YCL030C	chrIII	-	TATA-less	TAF1-depleted	2220	68366	68393	-27	YCL030C	1.1	0.685526345	NA	NA	NA	NA	NA	NA	NA	NA	NA	NA
510	514	CUT041	chrIII	+	TATA-less	TAF1-enriched	89	68962	68944	-18	CUT041	3.3	0.114291403	NA	NA	NA	NA	NA	NA	NA	NA	NA	NA
511	515	YCL029C	chrIII	-	TATA-less	TAF1-enriched	34	NA	69959	NA	YCL029C	1349.5	0.306238474	NA	NA	NA	NA	NA	NA	NA	NA	NA	NA
512	516	YCL027W	chrIII	+	TATA-less	TAF1-depleted	62	71892	71782	-110	YCL027W	122.8	0.555027108	NA	NA	NA	NA	NA	NA	NA	NA	NA	NA
513	517	orphan	chrIII	+	TATA-less	TAF1-enriched	5	74696	74645	-51	orphan	0	NA	NA	NA	NA	NA	NA	NA	NA	NA	NA	NA
514	518	YCL025C	chrIII	-	TATA-containing	TAF1-depleted	2700	77887	77950	-63	YCL025C	6	0.880129776	NA	NA	NA	NA	NA	NA	NA	NA	NA	NA
515	519	orphan	chrIII	-	TATA-less	TAF1-enriched	1390	78103	78209	-106	orphan	9.4	0.34550671	NA	NA	NA	NA	NA	NA	NA	NA	NA	NA
516	520	YCL024W	chrIII	+	TATA-less	TAF1-enriched	98	79132	79100	-32	YCL024W	0.1	NA	NA	NA	NA	NA	NA	NA	NA	NA	NA	NA
517	521	orphan	chrIII	-	TATA-less	TAF1-enriched	892	82460	82545	-85	orphan	0.8	0.255005709	NA	NA	NA	NA	NA	NA	NA	NA	NA	NA
518	522	YCL017C	chrIII	-	TATA-less	TAF1-enriched	1889	94325	94380	-55	YCL017C	9.4	0.483922469	NA	NA	NA	NA	NA	NA	NA	NA	NA	NA
519	523	YCL016C	chrIII	-	TATA-less	TAF1-enriched	3473	95750	95795	-45	YCL016C	19.9	0.839422594	NA	NA	NA	NA	NA	NA	NA	NA	NA	NA
520	524	YCL014W	chrIII	+	TATA-less	TAF1-enriched	854	96214	96184	-30	YCL014W	0.4	0.781616287	NA	NA	NA	NA	NA	NA	NA	NA	NA	NA
521	525	YCL011C	chrIII	-	TATA-less	TAF1-enriched	1235	103339	103385	-46	YCL011C	0	NA	NA	NA	NA	NA	NA	NA	NA	NA	NA	NA
522	526	YCL010C	chrIII	-	TATA-less	TAF1-enriched	267	104331	104370	-39	YCL010C	2502.3	0.000596217	0.303935093	0.0215645	0.068498044	0.486701665	0.075970677	0.486701665	0.549408625	0.208160266	1	TRUE
523	527	YCL009C	chrIII	-	TATA-less	TAF1-enriched	24848	105523	105566	-43	YCL009C	0	NA	NA	NA	NA	NA	NA	NA	NA	NA	NA	NA
524	528	CUT042	chrIII	+	TATA-less	TAF1-enriched	31	105968	105828	-140	CUT042	21.2	0.309333659	NA	NA	NA	NA	NA	NA	NA	NA	NA	NA
525	529	YCL008C	chrIII	-	TATA-less	TAF1-depleted	430	106811	106864	-53	YCL008C	0	NA	NA	NA	NA	NA	NA	NA	NA	NA	NA	NA
526	530	orphan	chrIII	+	TATA-less	TAF1-enriched	16	107586	107498	-88	orphan	5.2	0.455090197	NA	NA	NA	NA	NA	NA	NA	NA	NA	NA
527	531	YCL005W	chrIII	+	TATA-less	TAF1-enriched	1328	108038	107975	-63	YCL005W	26.4	0.966621979	NA	NA	NA	NA	NA	NA	NA	NA	NA	NA
528	532	orphan	chrIII	+	TATA-less	TAF1-enriched	1424	109259	109094	-165	orphan	10.5	0.242518705	NA	NA	NA	NA	NA	NA	NA	NA	NA	NA
529	533	YCL001W	chrIII	+	TATA-less	TAF1-enriched	400	111911	111909	-2	YCL001W	690.7	0.022486629	0.818178823	0.080611567	0.096497591	0.275157683	0.259721179	0.26065721	0.158890476	0.321915143	0	FALSE
530	534	ST3953	chrIII	-	TATA-less	TAF1-enriched	8	NA	114334	NA	ST3953	4.2	0.414459624	NA	NA	NA	NA	NA	NA	NA	NA	NA	NA
531	535	YCR002C	chrIII	-	TATA-less	TAF1-enriched	2067	118351	118393	-42	YCR002C	8.3	0.14606387	NA	NA	NA	NA	NA	NA	NA	NA	NA	NA
532	536	YCR003W	chrIII	+	TATA-less	TAF1-enriched	101	118648	118598	-50	YCR003W	0.9	0.078556527	NA	NA	NA	NA	NA	NA	NA	NA	NA	NA
533	537	orphan	chrIII	+	TATA-less	TAF1-enriched	882	120296	120152	-144	orphan	2.9	0.046825953	0.064993927	0.060750809	0.705438028	0.420656373	0.003757079	0.008973522	0.188364626	0.217733972	2	TRUE
534	538	YCR004C	chrIII	-	TATA-containing	TAF1-enriched	1463	120505	120541	-36	YCR004C	188.5	0.383513423	NA	NA	NA	NA	NA	NA	NA	NA	NA	NA
535	539	orphan	chrIII	+	TATA-containing	TAF1-enriched	17	120963	120802	-161	orphan	0	NA	NA	NA	NA	NA	NA	NA	NA	NA	NA	NA
536	540	YCR005C	chrIII	-	TATA-containing	TAF1-depleted	1121	122164	122385	-221	YCR005C	3.8	0.515064409	NA	NA	NA	NA	NA	NA	NA	NA	NA	NA
537	541	ST0304	chrIII	+	TATA-less	TAF1-enriched	1143	123374	123367	-7	ST0304	0.9	0.70969157	NA	NA	NA	NA	NA	NA	NA	NA	NA	NA
538	542	orphan	chrIII	+	TATA-less	TAF1-enriched	35	124116	124056	-60	orphan	0.7	0.184608466	NA	NA	NA	NA	NA	NA	NA	NA	NA	NA
539	543	orphan	chrIII	-	TATA-less	TAF1-enriched	178	124960	125011	-51	orphan	25.2	0.553727702	NA	NA	NA	NA	NA	NA	NA	NA	NA	NA
540	544	YCR007C	chrIII	-	TATA-less	TAF1-enriched	87	126344	126342	2	YCR007C	66.2	0.590142761	NA	NA	NA	NA	NA	NA	NA	NA	NA	NA
541	545	YCR008W	chrIII	+	TATA-containing	TAF1-depleted	1762	NA	128027	NA	YCR008W	2.1	0.292228433	NA	NA	NA	NA	NA	NA	NA	NA	NA	NA
542	546	YCR009C	chrIII	-	TATA-less	TAF1-enriched	629	131550	131585	-35	YCR009C	276.2	0.027694806	0.443405111	0.045008304	0.175005773	0.651198482	0.738743592	0.272225469	0.095397523	0.196458222	1	TRUE
543	547	CUT044	chrIII	+	TATA-less	TAF1-enriched	18	NA	131848	NA	CUT044	0.5	0.418959745	NA	NA	NA	NA	NA	NA	NA	NA	NA	NA
544	548	YCR011C	chrIII	-	TATA-less	TAF1-enriched	288	136786	136961	-175	YCR011C	0	NA	NA	NA	NA	NA	NA	NA	NA	NA	NA	NA
545	549	YCR012W	chrIII	+	TATA-containing	TAF1-depleted	7511	137821	137706	-115	YCR012W	869.7	0.061018118	NA	NA	NA	NA	NA	NA	NA	NA	NA	NA
546	550	YCR013C	chrIII	-	TATA-less	TAF1-enriched	16	138882	139023	-141	YCR013C	12.5	0.351161402	NA	NA	NA	NA	NA	NA	NA	NA	NA	NA
547	551	CUT045	chrIII	+	TATA-less	TAF1-enriched	61	139361	139334	-27	CUT045	0.9	0.739585518	NA	NA	NA	NA	NA	NA	NA	NA	NA	NA
548	552	YCR015C	chrIII	-	TATA-less	TAF1-enriched	456	142124	142397	-273	YCR015C	0	NA	NA	NA	NA	NA	NA	NA	NA	NA	NA	NA
549	553	orphan	chrIII	+	TATA-containing	TAF1-depleted	0	142761	142733	-28	orphan	9.6	0.213582188	NA	NA	NA	NA	NA	NA	NA	NA	NA	NA
550	554	tG(GCC)C	chrIII	+	TATA-less	-	0	NA	142832	NA	tG(GCC)C	10	0.056156826	NA	NA	NA	NA	NA	NA	NA	NA	NA	NA
551	555	YCR016W	chrIII	+	TATA-less	TAF1-enriched	1679	143651	143608	-43	YCR016W	7	0.427273512	NA	NA	NA	NA	NA	NA	NA	NA	NA	NA
552	556	YCR017C	chrIII	-	TATA-less	TAF1-enriched	4869	147635	147663	-28	YCR017C	22.7	0.671940834	NA	NA	NA	NA	NA	NA	NA	NA	NA	NA
553	558	orphan	chrIII	-	TATA-less	TAF1-enriched	96	148540	148561	-21	orphan	225.2	0.0584949	NA	NA	NA	NA	NA	NA	NA	NA	NA	NA
554	559	orphan	chrIII	+	TATA-less	TAF1-enriched	0	NA	152289	NA	orphan	6.4	0.057407247	NA	NA	NA	NA	NA	NA	NA	NA	NA	NA
555	560	YCR019W	chrIII	+	TATA-less	TAF1-enriched	96	152839	152711	-128	YCR019W	13.6	0.26959043	NA	NA	NA	NA	NA	NA	NA	NA	NA	NA
556	561	YCR021C	chrIII	-	TATA-containing	TAF1-depleted	1691	156986	157207	-221	YCR021C	9.8	0.348710523	NA	NA	NA	NA	NA	NA	NA	NA	NA	NA
557	562	YCR022C	chrIII	-	TATA-less	TAF1-enriched	43	157657	157772	-115	YCR022C	6.1	0.977325497	NA	NA	NA	NA	NA	NA	NA	NA	NA	NA
558	563	orphan	chrIII	+	TATA-less	TAF1-enriched	295	158688	158609	-79	orphan	593	0.000594373	0.748236862	0.079994401	0.388127987	0.090251814	0.052446918	0.090251814	0.200823186	0.29151733	0	FALSE
559	564	YCR023C	chrIII	-	TATA-less	TAF1-enriched	474	160401	160450	-49	YCR023C	4.6	0.775893197	NA	NA	NA	NA	NA	NA	NA	NA	NA	NA
560	565	YCR024C-A	chrIII	-	TATA-containing	TAF1-depleted	1857	162983	163275	-292	YCR024C-A	45	0.316869694	NA	NA	NA	NA	NA	NA	NA	NA	NA	NA
561	566	orphan	chrIII	-	TATA-less	TAF1-enriched	45	163594	163697	-103	orphan	28.4	0.724628189	NA	NA	NA	NA	NA	NA	NA	NA	NA	NA
562	567	YCR026C	chrIII	-	TATA-containing	TAF1-enriched	43	166358	166413	-55	YCR026C	11.9	0.158564789	NA	NA	NA	NA	NA	NA	NA	NA	NA	NA
563	568	YCR027C	chrIII	-	TATA-less	TAF1-depleted	488	168134	168199	-65	YCR027C	0.3	NA	NA	NA	NA	NA	NA	NA	NA	NA	NA	NA
564	569	tQ(UUG)C	chrIII	+	TATA-less	-	0	168563	168440	-123	tQ(UUG)C	0.6	0.358983061	NA	NA	NA	NA	NA	NA	NA	NA	NA	NA
565	570	orphan	chrIII	-	TATA-less	TAF1-enriched	12	169173	169230	-57	orphan	10.8	0.383889527	NA	NA	NA	NA	NA	NA	NA	NA	NA	NA
566	571	YCR028C	chrIII	-	TATA-containing	TAF1-enriched	1265	172426	172493	-67	YCR028C	3.2	0.064341041	NA	NA	NA	NA	NA	NA	NA	NA	NA	NA
567	572	orphan	chrIII	-	TATA-containing	TAF1-enriched	3	172715	172816	-101	orphan	10.6	0.904603281	NA	NA	NA	NA	NA	NA	NA	NA	NA	NA
568	573	YCR028C-A	chrIII	-	TATA-less	TAF1-enriched	1252	173418	173502	-84	YCR028C-A	9.2	0.364945662	NA	NA	NA	NA	NA	NA	NA	NA	NA	NA
569	574	YCR030C	chrIII	-	TATA-less	TAF1-enriched	278	176482	176517	-35	YCR030C	7.3	0.692845192	NA	NA	NA	NA	NA	NA	NA	NA	NA	NA
570	575	ST3981	chrIII	-	TATA-less	TAF1-depleted	75	176880	176904	-24	ST3981	9.9	0.271070718	NA	NA	NA	NA	NA	NA	NA	NA	NA	NA
571	576	YCR031C	chrIII	-	TATA-less	TAF1-enriched	11749	NA	178261	NA	YCR031C	1144	0.00239132	0.070257385	0.000639107	0.138010738	0.651686311	0.055511098	0.004546806	0.050408462	0.066073096	2	TRUE
572	577	orphan	chrIII	-	TATA-less	TAF1-depleted	2813	NA	178703	NA	orphan	0.4	0.282647297	NA	NA	NA	NA	NA	NA	NA	NA	NA	NA
573	578	CUT048	chrIII	+	TATA-less	TAF1-enriched	86	179188	179059	-129	CUT048	88.3	0.178742476	NA	NA	NA	NA	NA	NA	NA	NA	NA	NA
574	579	orphan	chrIII	-	TATA-less	TAF1-enriched	120	185994	186007	-13	orphan	0	NA	NA	NA	NA	NA	NA	NA	NA	NA	NA	NA
575	580	YCR033W	chrIII	+	TATA-less	TAF1-enriched	639	186324	186267	-57	YCR033W	0	NA	NA	NA	NA	NA	NA	NA	NA	NA	NA	NA
576	581	YCR034W	chrIII	+	TATA-less	TAF1-enriched	51488	190606	190566	-40	YCR034W	0	NA	NA	NA	NA	NA	NA	NA	NA	NA	NA	NA
577	582	YCR035C	chrIII	-	TATA-less	TAF1-enriched	344	193010	193036	-26	YCR035C	0.9	0.220359457	NA	NA	NA	NA	NA	NA	NA	NA	NA	NA
578	583	YCR036W	chrIII	+	TATA-less	TAF1-enriched	230	193331	193257	-74	YCR036W	29.2	0.026181089	0.814906945	0.155830697	0.748547392	0.422906867	0.018331151	0.797607811	0.740593028	0.67688181	1	TRUE
579	584	YCR037C	chrIII	-	TATA-less	TAF1-enriched	79	197039	197174	-135	YCR037C	0	NA	NA	NA	NA	NA	NA	NA	NA	NA	NA	NA
580	585	orphan	chrIII	+	TATA-less	TAF1-enriched	18	197655	197646	-9	orphan	0	NA	NA	NA	NA	NA	NA	NA	NA	NA	NA	NA
581	586	ST0323	chrIII	+	TATA-less	TAF1-enriched	306	202768	202731	-37	ST0323	0.3	0.391625176	NA	NA	NA	NA	NA	NA	NA	NA	NA	NA
582	587	YCR042C	chrIII	-	TATA-less	TAF1-enriched	188	205388	205420	-32	YCR042C	211	0.003528341	0.065815387	0.035510356	0.773426862	0.012592417	0.116583012	0.003251219	0.57718114	0.564756688	3	TRUE
583	588	YCR043C	chrIII	-	TATA-less	TAF1-enriched	283	206625	206675	-50	YCR043C	43.3	0.135690972	NA	NA	NA	NA	NA	NA	NA	NA	NA	NA
584	589	YCR044C	chrIII	-	TATA-less	TAF1-enriched	797	207927	207960	-33	YCR044C	27.2	0.292420683	NA	NA	NA	NA	NA	NA	NA	NA	NA	NA
585	590	YCR045C	chrIII	-	TATA-less	TAF1-enriched	5	209914	209986	-72	YCR045C	0.2	0.123085108	NA	NA	NA	NA	NA	NA	NA	NA	NA	NA
586	591	YCR046C	chrIII	-	TATA-less	TAF1-enriched	9690	210397	210429	-32	YCR046C	0	NA	NA	NA	NA	NA	NA	NA	NA	NA	NA	NA
587	592	YCR047C	chrIII	-	TATA-less	TAF1-enriched	91	211581	211634	-53	YCR047C	0	NA	NA	NA	NA	NA	NA	NA	NA	NA	NA	NA
588	593	YCR048W	chrIII	+	TATA-less	TAF1-enriched	641	211902	211882	-20	YCR048W	15.6	0.285739227	NA	NA	NA	NA	NA	NA	NA	NA	NA	NA
589	594	YCR051W	chrIII	+	TATA-less	TAF1-enriched	1691	214099	214062	-37	YCR051W	720.4	0.006051904	0.327616947	0.313383977	0.328902602	0.136619595	0.179244897	0.036020002	0.08262091	0.642536479	1	TRUE
590	595	YCR052W	chrIII	+	TATA-less	TAF1-enriched	4748	215014	214961	-53	YCR052W	15	0.723988087	NA	NA	NA	NA	NA	NA	NA	NA	NA	NA
591	596	YCR053W	chrIII	+	TATA-less	TAF1-enriched	17163	216690	216622	-68	YCR053W	510.5	0.084031456	NA	NA	NA	NA	NA	NA	NA	NA	NA	NA
592	597	YCR054C	chrIII	-	TATA-less	TAF1-enriched	643	220022	220171	-149	YCR054C	9.3	0.48719373	NA	NA	NA	NA	NA	NA	NA	NA	NA	NA
593	598	YCR057C	chrIII	-	TATA-less	TAF1-enriched	3767	223225	223284	-59	YCR057C	276.6	0.28324183	NA	NA	NA	NA	NA	NA	NA	NA	NA	NA
594	599	ST0331	chrIII	+	TATA-less	TAF1-enriched	73	223542	223511	-31	ST0331	0.7	0.917532281	NA	NA	NA	NA	NA	NA	NA	NA	NA	NA
595	600	YCR060W	chrIII	+	TATA-containing	TAF1-enriched	286	224448	224399	-49	YCR060W	3.4	0.473639255	NA	NA	NA	NA	NA	NA	NA	NA	NA	NA
596	601	YCR061W	chrIII	+	TATA-less	TAF1-enriched	190	225560	225493	-67	YCR061W	0.6	0.274714038	NA	NA	NA	NA	NA	NA	NA	NA	NA	NA
597	602	tS(CGA)C	chrIII	+	TATA-less	-	413	NA	227932	NA	tS(CGA)C	3.2	0.866327031	NA	NA	NA	NA	NA	NA	NA	NA	NA	NA
598	603	YCR063W	chrIII	+	TATA-less	TAF1-enriched	2262	228346	228295	-51	YCR063W	2.9	0.84404058	NA	NA	NA	NA	NA	NA	NA	NA	NA	NA
599	604	YCR064C	chrIII	-	TATA-less	TAF1-enriched	31	228494	228505	-11	YCR064C	192.5	0.056301322	NA	NA	NA	NA	NA	NA	NA	NA	NA	NA
600	605	YCR065W	chrIII	+	TATA-less	TAF1-depleted	575	229297	229129	-168	YCR065W	1780.5	0.790718064	NA	NA	NA	NA	NA	NA	NA	NA	NA	NA
601	606	YCR066W	chrIII	+	TATA-less	TAF1-enriched	658	231506	231454	-52	YCR066W	9.7	0.408857833	NA	NA	NA	NA	NA	NA	NA	NA	NA	NA
602	607	YCR067C	chrIII	-	TATA-containing	TAF1-enriched	5499	236380	236441	-61	YCR067C	1	0.25878833	NA	NA	NA	NA	NA	NA	NA	NA	NA	NA
603	608	YCR068W	chrIII	+	TATA-less	TAF1-enriched	136	237108	237075	-33	YCR068W	24.9	0.111962836	NA	NA	NA	NA	NA	NA	NA	NA	NA	NA
604	609	CUT467	chrIII	-	TATA-less	TAF1-enriched	99	238459	238646	-187	CUT467	11.4	0.399668813	NA	NA	NA	NA	NA	NA	NA	NA	NA	NA
605	610	YCR069W	chrIII	+	TATA-less	TAF1-enriched	5147	238962	238931	-31	YCR069W	6.1	0.430224167	NA	NA	NA	NA	NA	NA	NA	NA	NA	NA
606	611	YCR071C	chrIII	-	TATA-less	TAF1-enriched	261	240541	240582	-41	YCR071C	12.8	0.248643244	NA	NA	NA	NA	NA	NA	NA	NA	NA	NA
607	612	YCR072C	chrIII	-	TATA-containing	TAF1-enriched	1642	242337	242379	-42	YCR072C	38.2	0.33884458	NA	NA	NA	NA	NA	NA	NA	NA	NA	NA
608	613	ST0339	chrIII	+	TATA-less	TAF1-enriched	397	242625	242592	-33	ST0339	2	0.122197329	NA	NA	NA	NA	NA	NA	NA	NA	NA	NA
609	614	YCR073C	chrIII	-	TATA-less	TAF1-enriched	21	246591	246639	-48	YCR073C	1.1	0.464725245	NA	NA	NA	NA	NA	NA	NA	NA	NA	NA
610	615	YCR073W-A	chrIII	+	TATA-less	TAF1-enriched	1313	246992	246950	-42	YCR073W-A	16.2	0.678294066	NA	NA	NA	NA	NA	NA	NA	NA	NA	NA
611	616	YCR075C	chrIII	-	TATA-less	TAF1-depleted	73	248787	248813	-26	YCR075C	0	NA	NA	NA	NA	NA	NA	NA	NA	NA	NA	NA
612	617	orphan	chrIII	-	TATA-containing	TAF1-enriched	104	250002	250039	-37	orphan	0.2	0.814706044	NA	NA	NA	NA	NA	NA	NA	NA	NA	NA
613	618	YCR077C	chrIII	-	TATA-less	TAF1-enriched	414	252606	252645	-39	YCR077C	240	0.36595063	NA	NA	NA	NA	NA	NA	NA	NA	NA	NA
614	619	YCR079W	chrIII	+	TATA-less	TAF1-enriched	166	252879	252813	-66	YCR079W	0	NA	NA	NA	NA	NA	NA	NA	NA	NA	NA	NA
615	620	YCR081W	chrIII	+	TATA-less	TAF1-enriched	3515	254418	254357	-61	YCR081W	13.2	0.067306212	NA	NA	NA	NA	NA	NA	NA	NA	NA	NA
616	621	YCR082W	chrIII	+	TATA-less	TAF1-enriched	6732	258885	258853	-32	YCR082W	6.1	0.434754451	NA	NA	NA	NA	NA	NA	NA	NA	NA	NA
617	622	YCR083W	chrIII	+	TATA-less	TAF1-enriched	659	259590	259543	-47	YCR083W	2.6	0.020235822	0.170873221	0.455095377	0.811374459	0.026686981	0.002827157	0.003367587	0.097145816	0.306402558	3	TRUE
618	623	YCR084C	chrIII	-	TATA-less	TAF1-enriched	27585	262597	262677	-80	YCR084C	4184.6	0.013578229	0.346044869	0.361325569	0.44842667	0.467971463	0.014011186	0.467971463	0.492006772	0.160562705	1	TRUE
619	624	YCR086W	chrIII	+	TATA-less	TAF1-enriched	85	263401	263314	-87	YCR086W	17.3	0.073884066	NA	NA	NA	NA	NA	NA	NA	NA	NA	NA
620	625	YCR087C-A	chrIII	-	TATA-less	TAF1-enriched	465	264443	264493	-50	YCR087C-A	0.2	0.331298939	NA	NA	NA	NA	NA	NA	NA	NA	NA	NA
621	626	YCR088W	chrIII	+	TATA-less	TAF1-enriched	3283	265086	265029	-57	YCR088W	3.3	0.939299291	NA	NA	NA	NA	NA	NA	NA	NA	NA	NA
622	627	YCR089W	chrIII	+	TATA-less	TAF1-depleted	45	267157	267136	-21	YCR089W	528.2	0.007011624	0.815301803	0.010184213	0.221155885	0.341309905	0.134421035	0.152324602	0.876938763	0.077191316	1	TRUE
623	628	YCR090C	chrIII	-	TATA-less	TAF1-enriched	78	272837	272878	-41	YCR090C	0.4	0.423190081	NA	NA	NA	NA	NA	NA	NA	NA	NA	NA
624	629	YCR092C	chrIII	-	TATA-less	TAF1-enriched	25	279828	279849	-21	YCR092C	1151.4	0.016363784	0.463423502	0.00697042	0.22213543	0.22213543	0.493738563	0.22213543	0.678308402	0.148242698	1	TRUE
625	630	YCR093W	chrIII	+	TATA-less	TAF1-enriched	614	280129	280087	-42	YCR093W	18.4	0.579706172	NA	NA	NA	NA	NA	NA	NA	NA	NA	NA
626	631	YCR094W	chrIII	+	TATA-less	TAF1-enriched	2999	286748	286699	-49	YCR094W	1.4	0.441542484	NA	NA	NA	NA	NA	NA	NA	NA	NA	NA
627	632	YCR095C	chrIII	-	TATA-less	TAF1-enriched	118	289247	289296	-49	YCR095C	2.2	0.127250836	NA	NA	NA	NA	NA	NA	NA	NA	NA	NA
628	633	YCR095W-A	chrIII	+	TATA-less	TAF1-enriched	20	289522	289501	-21	YCR095W-A	70.6	0.577009842	NA	NA	NA	NA	NA	NA	NA	NA	NA	NA
629	634	YCR097W	chrIII	+	TATA-less	TAF1-enriched	204	293856	293832	-24	YCR097W	62	0.582930438	NA	NA	NA	NA	NA	NA	NA	NA	NA	NA
630	635	orphan	chrIII	-	TATA-less	TAF1-enriched	173	299053	299017	36	orphan	0.2	0.393700709	NA	NA	NA	NA	NA	NA	NA	NA	NA	NA
631	636	YCR106W	chrIII	+	TATA-less	TAF1-enriched	44	310968	310944	-24	YCR106W	0.8	0.385054488	NA	NA	NA	NA	NA	NA	NA	NA	NA	NA
632	637	orphan	chrIV	-	TATA-less	TAF1-enriched	105	20037	20129	-92	orphan	79.3	0.080015035	NA	NA	NA	NA	NA	NA	NA	NA	NA	NA
633	638	YDL241W	chrIV	+	TATA-less	TAF1-enriched	137	20194	20178	-16	YDL241W	33.8	0.070174806	NA	NA	NA	NA	NA	NA	NA	NA	NA	NA
634	639	orphan	chrIV	-	TATA-containing	TAF1-enriched	0	20380	20483	-103	orphan	0.8	0.169171104	NA	NA	NA	NA	NA	NA	NA	NA	NA	NA
635	640	CUT468	chrIV	-	TATA-less	TAF1-enriched	4	22413	22436	-23	CUT468	109.2	0.542499622	NA	NA	NA	NA	NA	NA	NA	NA	NA	NA
636	641	YDL240W	chrIV	+	TATA-less	TAF1-enriched	1904	22680	22651	-29	YDL240W	42.9	0.186487324	NA	NA	NA	NA	NA	NA	NA	NA	NA	NA
637	642	YDL236W	chrIV	+	TATA-less	TAF1-enriched	1504	32311	32259	-52	YDL236W	1042.6	0.113938458	NA	NA	NA	NA	NA	NA	NA	NA	NA	NA
638	643	YDL235C	chrIV	-	TATA-less	TAF1-depleted	347	33998	34025	-27	YDL235C	1871.9	0.000551509	0.520433894	0.039447634	1	0.063447145	0.086440205	0.013737321	0.090298394	0.212019977	2	TRUE
639	644	orphan	chrIV	+	TATA-less	TAF1-enriched	8	NA	34315	NA	orphan	1.9	0.547668201	NA	NA	NA	NA	NA	NA	NA	NA	NA	NA
640	645	YDL232W	chrIV	+	TATA-less	TAF1-enriched	3046	38504	38458	-46	YDL232W	9101.6	0.000325109	0.036926543	0.136116222	0.079239961	0.641710149	0.053780564	0.967442118	0.548032217	0.079239961	1	TRUE
641	646	YDL231C	chrIV	-	TATA-less	TAF1-enriched	331	42315	42349	-34	YDL231C	197.8	0.202267905	NA	NA	NA	NA	NA	NA	NA	NA	NA	NA
642	647	YDL230W	chrIV	+	TATA-less	TAF1-enriched	286	42704	42670	-34	YDL230W	930.4	0.130689447	NA	NA	NA	NA	NA	NA	NA	NA	NA	NA
643	648	YDL229W	chrIV	+	TATA-containing	TAF1-depleted	11366	44056	44035	-21	YDL229W	37073	0.000587675	0.047472255	0.321670341	1	0.02991299	1	0.007409343	0.000154247	1	4	TRUE
644	649	YDL227C	chrIV	-	TATA-less	TAF1-enriched	390	47967	48070	-103	YDL227C	157.8	0.242004586	NA	NA	NA	NA	NA	NA	NA	NA	NA	NA
645	650	orphan	chrIV	+	TATA-less	TAF1-enriched	48	49907	49902	-5	orphan	74.6	0.028487262	0.162992083	0.176540899	0.690647032	0.046603525	0.918155629	0.762299416	0.524062969	0.122551677	1	TRUE
646	651	orphan	chrIV	+	TATA-containing	TAF1-enriched	59	50595	50512	-83	orphan	41.3	0.807265815	NA	NA	NA	NA	NA	NA	NA	NA	NA	NA
647	652	YDL226C	chrIV	-	TATA-less	TAF1-enriched	7087	52162	52200	-38	YDL226C	2165.3	0.000301926	0.278479903	0.185313267	0.099176614	1	0.008301682	0.597752877	0.125364477	0.029518394	2	TRUE
648	653	YDL225W	chrIV	+	TATA-less	TAF1-enriched	2767	52442	52396	-46	YDL225W	461.4	0.007408908	0.004319441	0.072704336	0.214671927	0.084661353	0.917154257	0.252568262	0.151155365	0.987143	1	TRUE
649	654	YDL224C	chrIV	-	TATA-less	TAF1-enriched	277	56665	56710	-45	YDL224C	215.4	0.690807363	NA	NA	NA	NA	NA	NA	NA	NA	NA	NA
650	655	YDL219W	chrIV	+	TATA-less	TAF1-enriched	386	65277	65211	-66	YDL219W	1045.3	0.004732342	0.222002023	0.015852661	0.110986042	0.189180317	0.039632681	0.888356218	0.646651137	0.524868245	2	TRUE
651	656	CUT470	chrIV	-	TATA-less	TAF1-enriched	1	65912	65946	-34	CUT470	88.6	0.051763479	NA	NA	NA	NA	NA	NA	NA	NA	NA	NA
652	657	YDL217C	chrIV	-	TATA-less	TAF1-enriched	115	68715	68770	-55	YDL217C	236.6	0.001309538	0.305444267	0.312405334	0.275463233	0.07245813	0.110878148	0.022764644	0.384521472	0.275463233	1	TRUE
653	658	orphan	chrIV	-	TATA-less	TAF1-enriched	166	70279	70298	-19	orphan	149.5	0.172812114	NA	NA	NA	NA	NA	NA	NA	NA	NA	NA
654	659	orphan	chrIV	-	TATA-less	TAF1-enriched	228	73298	73360	-62	orphan	556.9	0.006785831	0.21279619	1	0.021153654	0.489730829	0.013880685	0.489730829	0.201067754	0.347011917	2	TRUE
655	660	CUT050	chrIV	+	TATA-less	TAF1-enriched	21	73625	73601	-24	CUT050	51.9	0.054956877	NA	NA	NA	NA	NA	NA	NA	NA	NA	NA
656	661	YDL215C	chrIV	-	TATA-less	TAF1-enriched	168	73932	74100	-168	YDL215C	745	0.009420791	0.1627659	0.205881968	0.19152967	0.030298931	0.853179959	0.104243487	0.71128925	1	1	TRUE
657	662	orphan	chrIV	+	TATA-less	TAF1-enriched	21	74428	74423	-5	orphan	7.4	0.169804805	NA	NA	NA	NA	NA	NA	NA	NA	NA	NA
658	663	YDL213C	chrIV	-	TATA-less	TAF1-enriched	228	77936	77985	-49	YDL213C	2113.2	0.000989496	0.087855106	0.06807137	0.498424215	0.583675203	0.219554249	0.65176315	0.022081746	0.498424215	1	TRUE
659	664	YDL212W	chrIV	+	TATA-containing	TAF1-enriched	682	78435	78387	-48	YDL212W	4287.2	0.014957143	0.949012425	0.26310918	0.326737712	1	0.002106575	0.092722055	0.587399507	1	1	TRUE
660	665	ST0370	chrIV	+	TATA-less	TAF1-enriched	85	80738	80708	-30	ST0370	51.3	0.356164083	NA	NA	NA	NA	NA	NA	NA	NA	NA	NA
661	666	tG(GCC)D1	chrIV	-	TATA-less	-	0	83390	83470	-80	tG(GCC)D1	0	NA	NA	NA	NA	NA	NA	NA	NA	NA	NA	NA
662	667	YDL209C	chrIV	-	TATA-less	TAF1-enriched	59	87216	87248	-32	YDL209C	437.4	0.004636138	0.323889658	0.109864103	0.787034762	0.417658973	0.727255162	0.015828933	0.367048957	0.259644261	1	TRUE
663	668	YDL208W	chrIV	+	TATA-less	TAF1-enriched	2408	87535	87467	-68	YDL208W	5336	0.011001504	0.309903365	0.444124065	0.90376489	0.298433708	0.265518793	0.044744109	0.02267222	0.054048501	2	TRUE
664	669	YDL207W	chrIV	+	TATA-less	TAF1-enriched	821	88279	88243	-36	YDL207W	230.8	0.88693356	NA	NA	NA	NA	NA	NA	NA	NA	NA	NA
665	670	YDL205C	chrIV	-	TATA-containing	TAF1-enriched	426	93888	93929	-41	YDL205C	2068.6	0.111799506	NA	NA	NA	NA	NA	NA	NA	NA	NA	NA
666	671	YDL204W	chrIV	+	TATA-less	TAF1-enriched	283	94358	94205	-153	YDL204W	210.9	0.04618065	0.79080168	0.282009496	0.008915019	0.846390729	0.218827468	0.219849303	0.113203177	0.007365052	2	TRUE
667	672	YDL203C	chrIV	-	TATA-less	TAF1-enriched	44	97924	98091	-167	YDL203C	310.4	0.020650875	0.371486876	0.02228314	0.967995425	0.175053945	0.356526394	0.778819437	0.77970067	0.853571241	1	TRUE
668	673	YDL202W	chrIV	+	TATA-less	TAF1-enriched	293	98476	98422	-54	YDL202W	304.9	0.002585871	0.930283194	0.129401049	0.022835614	0.35838015	0.005544701	0.266941352	0.991773459	0.077558227	2	TRUE
669	674	CUT472	chrIV	-	TATA-less	TAF1-enriched	27	99252	99330	-78	CUT472	20.2	0.203364806	NA	NA	NA	NA	NA	NA	NA	NA	NA	NA
670	675	YDL201W	chrIV	+	TATA-less	TAF1-enriched	1450	99551	99518	-33	YDL201W	756.1	0.014963723	0.281653763	0.018005107	0.011574886	0.318934472	0.003540385	0.369726966	0.391014141	0.739725683	3	TRUE
671	676	YDL198C	chrIV	-	TATA-less	TAF1-depleted	1292	104464	104585	-121	YDL198C	576.7	0.001781467	0.015907626	0.561260262	0.24869955	0.117070816	0.066008351	0.440315255	0.054791164	0.173718947	1	TRUE
672	677	YDL196W	chrIV	+	TATA-less	TAF1-enriched	176	106814	106739	-75	YDL196W	25.6	0.373410833	NA	NA	NA	NA	NA	NA	NA	NA	NA	NA
673	678	YDL197C	chrIV	-	TATA-less	TAF1-enriched	79	106814	106846	-32	YDL197C	327	0.000877276	0.031520131	0.802282564	0.048095537	0.657252758	0.034493948	0.077266784	0.223012115	0.396949738	3	TRUE
674	679	YDL194W	chrIV	+	TATA-less	TAF1-enriched	201	111410	111372	-38	YDL194W	182.6	0.009347474	0.077303526	0.892819891	0.380279461	0.092769801	0.257342509	0.027401265	0.284988996	0.380279461	1	TRUE
675	680	YDL193W	chrIV	+	TATA-less	TAF1-depleted	1539	114783	114599	-184	YDL193W	1540.4	0.004490726	0.074302076	0.002412761	0.234302342	0.683779351	0.124675044	0.005897537	0.866372661	0.234302342	2	TRUE
676	681	CUT473	chrIV	-	TATA-less	TAF1-enriched	47	NA	115954	NA	CUT473	54.8	0.066755929	NA	NA	NA	NA	NA	NA	NA	NA	NA	NA
677	682	YDL192W	chrIV	+	TATA-less	TAF1-enriched	292	116300	116238	-62	YDL192W	31046.8	0.000318011	0.080578249	0.115809921	0.204761608	0.052618058	0.130138309	0.070228416	0.672916652	0.148862108	0	FALSE
678	683	YDL191W	chrIV	+	TATA-less	TAF1-enriched	3999	117682	117611	-71	YDL191W	6741.1	0.005281615	0.052660295	0.015430242	0.284794219	0.672390359	0.167321241	0.887904265	0.67633462	0.87481954	1	TRUE
679	684	orphan	chrIV	-	TATA-less	TAF1-enriched	0	117682	117761	-79	orphan	0.1	0.609339267	NA	NA	NA	NA	NA	NA	NA	NA	NA	NA
680	685	YDL190C	chrIV	-	TATA-less	TAF1-enriched	3958	121741	121785	-44	YDL190C	1521.5	0.000213669	0.362559861	0.009051717	0.134627308	1	0.005272691	1	0.731319861	0.194761636	2	TRUE
681	686	YDL189W	chrIV	+	TATA-less	TAF1-enriched	378	122021	121996	-25	YDL189W	354	0.025406306	0.048714202	0.619597199	0.52232383	0.701081889	0.186335416	0.224153319	0.605707676	0.109727645	1	TRUE
682	687	YDL188C	chrIV	-	TATA-less	TAF1-enriched	1296	125119	125180	-61	YDL188C	357.5	0.005654938	0.026011816	0.043279171	0.180385036	0.286042497	0.004124372	0.286042497	0.748193517	0.505555223	3	TRUE
683	688	orphan	chrIV	-	TATA-less	TAF1-enriched	472	126403	126473	-70	orphan	268.5	0.053488765	NA	NA	NA	NA	NA	NA	NA	NA	NA	NA
684	689	YDL185W	chrIV	+	TATA-less	TAF1-enriched	4644	126753	126686	-67	YDL185W	36352.9	0.000969552	0.054182336	0.044604377	0.363290124	1	0.240530953	1	0.28024557	1	1	TRUE
685	690	YDL184C	chrIV	-	TATA-less	TAF1-enriched	578296	130465	130506	-41	YDL184C	134402.4	0.000885075	0.00350979	1	0.163083715	0.785505755	0.028098341	0.376430986	0.253506594	0.433959131	2	TRUE
686	691	orphan	chrIV	+	TATA-less	TAF1-enriched	6	132179	132159	-20	orphan	30.2	0.355808111	NA	NA	NA	NA	NA	NA	NA	NA	NA	NA
687	692	CUT474	chrIV	-	TATA-less	TAF1-enriched	87	132519	132673	-154	CUT474	52.3	0.118531247	NA	NA	NA	NA	NA	NA	NA	NA	NA	NA
688	693	YDL182W	chrIV	+	TATA-containing	TAF1-depleted	13775	133412	133405	-7	YDL182W	1553.3	0.004842444	0.178734299	0.298778103	0.018267359	0.90672474	0.004052203	0.90672474	0.375622249	0.036408564	3	TRUE
689	694	CUT475	chrIV	-	TATA-less	TAF1-enriched	49	134696	134743	-47	CUT475	114.7	0.037836709	0.110416756	0.009790546	0.567121077	0.171577384	0.934573229	0.111899585	0.636904408	0.056435794	1	TRUE
690	695	YDL181W	chrIV	+	TATA-less	TAF1-depleted	1533	135208	135114	-94	YDL181W	1392.4	0.003507824	0.727563349	0.450369759	0.065111687	0.54569097	0.013764997	0.111817217	0.218072699	0.035825452	2	TRUE
691	696	YDL180W	chrIV	+	TATA-less	TAF1-depleted	619	NA	135764	NA	YDL180W	53.7	0.046371596	0.884686063	0.11726919	0.7029825	0.048834114	0.114264599	0.135328522	0.934613186	0.252668207	1	TRUE
692	697	YDL179W	chrIV	+	TATA-less	TAF1-depleted	256	138289	138196	-93	YDL179W	493.4	0.003383397	0.759192101	0.121789328	0.096310726	0.501838632	0.016635873	0.159379632	0.756824044	0.212303497	1	TRUE
693	698	CUT476	chrIV	-	TATA-less	TAF1-enriched	23	139138	139257	-119	CUT476	105.7	0.055070422	NA	NA	NA	NA	NA	NA	NA	NA	NA	NA
694	699	YDL178W	chrIV	+	TATA-less	TAF1-enriched	561	139531	139500	-31	YDL178W	593.3	0.052562437	NA	NA	NA	NA	NA	NA	NA	NA	NA	NA
695	700	YDL177C	chrIV	-	TATA-less	TAF1-depleted	65	141542	141706	-164	YDL177C	169.3	0.103731295	NA	NA	NA	NA	NA	NA	NA	NA	NA	NA
696	701	YDL176W	chrIV	+	TATA-less	TAF1-enriched	318	142003	141960	-43	YDL176W	90.9	0.128591521	NA	NA	NA	NA	NA	NA	NA	NA	NA	NA
697	702	YDL175C	chrIV	-	TATA-less	TAF1-depleted	3398	145510	145545	-35	YDL175C	103.4	0.058750133	NA	NA	NA	NA	NA	NA	NA	NA	NA	NA
698	703	YDL174C	chrIV	-	TATA-containing	TAF1-enriched	1281	147520	147617	-97	YDL174C	381.9	0.170474541	NA	NA	NA	NA	NA	NA	NA	NA	NA	NA
699	704	YDL173W	chrIV	+	TATA-less	TAF1-enriched	1380	148209	148172	-37	YDL173W	428	0.037988725	0.268187199	0.204974309	0.434203116	0.146412115	0.820702875	0.299562149	0.265879623	0.137744974	0	FALSE
700	705	YDL172C	chrIV	-	TATA-less	TAF1-enriched	37	149373	149422	-49	YDL172C	54.9	0.144195121	NA	NA	NA	NA	NA	NA	NA	NA	NA	NA
701	706	YDL171C	chrIV	-	TATA-less	TAF1-enriched	4289	155849	155916	-67	YDL171C	439.9	0.003890175	0.000583674	0.004697928	0.397522759	0.100131249	0.967122895	0.174819769	0.885295538	0.43409667	2	TRUE
702	707	YDL170W	chrIV	+	TATA-less	TAF1-enriched	31	156360	156318	-42	YDL170W	449	0.002434642	0.642959314	0.03630275	0.222319879	0.617342875	0.021760044	0.99346501	0.120098716	0.261821314	2	TRUE
703	708	YDL168W	chrIV	+	TATA-less	TAF1-depleted	408	159568	159548	-20	YDL168W	687	0.002079838	0.306459988	0.447431622	0.011982959	0.31333008	0.000351044	0.810282428	0.664371485	0.001296169	3	TRUE
704	709	YDL167C	chrIV	-	TATA-less	TAF1-enriched	264	163155	163197	-42	YDL167C	674.8	0.01017396	0.00164536	0.065602071	0.6084078	0.051935543	0.713271851	0.051935543	0.891436166	0.890040856	1	TRUE
705	710	CUT051	chrIV	+	TATA-containing	TAF1-enriched	66	163445	163378	-67	CUT051	43.9	0.105318746	NA	NA	NA	NA	NA	NA	NA	NA	NA	NA
706	711	YDL166C	chrIV	-	TATA-containing	TAF1-enriched	585	164035	164098	-63	YDL166C	783.9	0.666084393	NA	NA	NA	NA	NA	NA	NA	NA	NA	NA
707	712	YDL164C	chrIV	-	TATA-less	TAF1-enriched	2482	NA	167254	NA	YDL164C	68.2	0.049388653	0.816222633	0.055193469	0.459362704	0.385837529	0.057415543	0.905007444	0.329191112	0.102899816	0	FALSE
708	713	YDL161W	chrIV	+	TATA-less	TAF1-enriched	59	167743	167714	-29	YDL161W	585	0.000831147	0.252762343	0.740598337	0.023922096	0.656260627	0.014390601	0.960557865	0.565563098	0.125261171	2	TRUE
709	714	YDL160C-A	chrIV	-	TATA-less	TAF1-enriched	250	169582	169628	-46	YDL160C-A	299.6	0.114843611	NA	NA	NA	NA	NA	NA	NA	NA	NA	NA
710	715	YDL160C	chrIV	-	TATA-less	TAF1-enriched	6517	172168	172214	-46	YDL160C	4478.5	0.000842686	0.00517232	0.118614709	0.006098618	1	0.025745294	1	1	0.225916962	3	TRUE
711	716	YDL159W	chrIV	+	TATA-less	TAF1-enriched	133	172474	172435	-39	YDL159W	639.3	0.002367312	0.025592569	0.000711823	0.375047349	0.161958226	0.044239306	0.126915225	0.00455144	0.570443913	4	TRUE
712	717	YDL157C	chrIV	-	TATA-less	TAF1-enriched	2129	174578	174623	-45	YDL157C	1503.6	0.023976214	0.45021046	0.812747646	0.052613173	0.376752728	0.055390767	0.29552505	0.139915188	0.009686818	1	TRUE
713	718	YDL156W	chrIV	+	TATA-less	TAF1-enriched	11	174872	174824	-48	YDL156W	152.9	0.002976231	0.120246721	0.85027151	0.714470942	0.258734136	0.084527878	0.054262909	0.009667614	0.474109059	1	TRUE
714	719	YDL155W	chrIV	+	TATA-less	TAF1-enriched	96	176679	176643	-36	YDL155W	154.1	0.180915794	NA	NA	NA	NA	NA	NA	NA	NA	NA	NA
715	720	orphan	chrIV	-	TATA-less	TAF1-enriched	7	179634	179814	-180	orphan	1.9	0.470815609	NA	NA	NA	NA	NA	NA	NA	NA	NA	NA
716	721	orphan	chrIV	+	TATA-less	TAF1-enriched	93	180094	180006	-88	orphan	358.9	0.002123918	0.250408272	0.374820968	0.09741938	0.25117638	0.00232584	0.15146644	0.537066565	0.566138091	1	TRUE
717	722	YDL153C	chrIV	-	TATA-containing	TAF1-enriched	103	183015	183044	-29	YDL153C	361.5	0.034550337	0.01938233	0.10795784	0.236183459	0.974459545	0.852449228	0.923483208	0.950564344	0.631060141	1	TRUE
718	723	YDL150W	chrIV	+	TATA-less	TAF1-enriched	113	183291	183247	-44	YDL150W	936.9	0.003932049	0.190285324	0.013551897	0.914635495	0.580634154	0.163164605	0.244976865	0.229016872	0.061239412	1	TRUE
719	724	YDL148C	chrIV	-	TATA-less	TAF1-enriched	104	190594	190637	-43	YDL148C	1307.6	0.001458074	0.083419913	0.20047505	0.126046954	0.048144325	0.550751846	0.048144325	0.410540247	0.064515236	2	TRUE
720	725	YDL147W	chrIV	+	TATA-less	TAF1-enriched	1477	190920	190878	-42	YDL147W	3708.4	0.060761195	NA	NA	NA	NA	NA	NA	NA	NA	NA	NA
721	726	YDL146W	chrIV	+	TATA-less	TAF1-enriched	710	192917	192594	-323	YDL146W	602.6	0.003744435	0.619787072	0.539946546	0.036250876	0.532998699	0.002586513	0.256387291	0.332072012	0.113520466	2	TRUE
722	727	YDL145C	chrIV	-	TATA-less	TAF1-enriched	2129	198411	198438	-27	YDL145C	1786.8	0.011471369	0.170807221	0.022154531	0.086405445	1	0.186946898	0.575093619	0.306934221	0.235195921	1	TRUE
723	728	YDL144C	chrIV	-	TATA-less	TAF1-enriched	395	199715	199749	-34	YDL144C	528.8	0.025012396	0.617902997	0.142340421	0.445223861	0.891340078	0.424399386	0.164469765	0.366762699	0.141412106	0	FALSE
724	729	YDL143W	chrIV	+	TATA-less	TAF1-enriched	2745	200011	199961	-50	YDL143W	1999.7	0.000388541	0.037461269	0.030016388	0.134179578	0.361917416	0.110179374	0.361917416	0.2391866	0.134179578	2	TRUE
725	730	YDL141W	chrIV	+	TATA-less	TAF1-enriched	163	202840	202801	-39	YDL141W	275.5	0.030085075	0.548833286	0.341887899	0.586025206	0.063159904	0.131156114	0.109204389	0.967010681	0.97444367	0	FALSE
726	731	orphan	chrIV	-	TATA-less	TAF1-enriched	3044	NA	211104	NA	orphan	237	0.026012996	0.309889943	0.816457594	0.212233683	0.519843122	0.572638896	0.83013449	0.845475258	0.509588682	0	FALSE
727	732	YDL139C	chrIV	-	TATA-less	TAF1-enriched	480	212017	212084	-67	YDL139C	213	0.003191986	0.540885178	1	0.114358501	0.987275472	0.621202787	0.271137429	0.869167941	0.434522102	0	FALSE
728	733	YDL138W	chrIV	+	TATA-less	TAF1-depleted	583	213262	213172	-90	YDL138W	159.5	0.11512524	NA	NA	NA	NA	NA	NA	NA	NA	NA	NA
729	734	CUT479	chrIV	-	TATA-containing	TAF1-enriched	226	215550	215711	-161	CUT479	1227.1	0.02219928	0.723149309	0.051368155	0.271542793	0.437672603	0.477868533	0.092643784	0.195588576	0.437672603	0	FALSE
730	736	orphan	chrIV	+	TATA-less	TAF1-enriched	3378	216070	216051	-19	orphan	5419.8	0.000483337	0.045534234	0.195695075	0.103779085	0.73517779	0.010537891	0.358568415	0.966827159	0.090792854	2	TRUE
731	737	ANT109	chrIV	-	TATA-less	TAF1-depleted	135	216994	217171	-177	ANT109	24.5	0.554704073	NA	NA	NA	NA	NA	NA	NA	NA	NA	NA
732	738	YDL136W	chrIV	+	TATA-less	TAF1-enriched	8604	NA	217567	NA	YDL136W	17267.6	0.001545652	0.273830528	0.072713398	0.017243571	0.620265447	0.01668641	0.452530626	0.967082223	0.452530626	2	TRUE
733	740	YDL135C	chrIV	-	TATA-less	TAF1-enriched	1684	219325	219333	-8	YDL135C	1233.9	0.001506725	0.309445256	0.025348441	0.61635131	0.744374466	0.53112445	0.109927656	0.126068365	0.066194658	1	TRUE
734	741	orphan	chrIV	+	TATA-less	TAF1-depleted	7	221371	221294	-77	orphan	4.6	0.231648517	NA	NA	NA	NA	NA	NA	NA	NA	NA	NA
735	742	YDL133C-A	chrIV	-	TATA-containing	TAF1-enriched	666155	221750	221819	-69	YDL133C-A	165085.6	0.000418629	0.057646596	0.183893155	0.138955585	0.252722532	0.088426401	0.055927327	0.687164285	0.366095316	0	FALSE
736	743	YDL131W	chrIV	+	TATA-containing	TAF1-depleted	12395	227451	227357	-94	YDL131W	1398	0.002957276	0.04895896	0.194270914	0.029195199	0.559788818	0.119407495	0.333744166	0.94244982	0.083008829	2	TRUE
737	744	YDL130W-A	chrIV	+	TATA-less	TAF1-enriched	4841	229157	229106	-51	YDL130W-A	775	0.058097408	NA	NA	NA	NA	NA	NA	NA	NA	NA	NA
738	745	YDL130W	chrIV	+	TATA-less	TAF1-enriched	23246	NA	229887	NA	YDL130W	156065	0.000469919	0.219225479	0.014003232	0.661819631	0.661819631	0.572288776	0.189450354	0.178123933	0.064234591	1	TRUE
739	746	orphan	chrIV	-	TATA-less	TAF1-enriched	19	230202	230243	-41	orphan	0.4	0.258990531	NA	NA	NA	NA	NA	NA	NA	NA	NA	NA
740	747	YDL129W	chrIV	+	TATA-less	TAF1-enriched	370	230936	230919	-17	YDL129W	1049.5	0.002667912	0.465163371	0.030626001	0.904473468	0.527344823	0.006597043	0.45683064	0.598346808	0.035359761	3	TRUE
741	748	YDL128W	chrIV	+	TATA-less	TAF1-enriched	97192	232668	232601	-67	YDL128W	9998.7	0.133768988	NA	NA	NA	NA	NA	NA	NA	NA	NA	NA
742	749	ANT110	chrIV	-	TATA-less	TAF1-enriched	7	NA	233911	NA	ANT110	39.8	0.3914721	NA	NA	NA	NA	NA	NA	NA	NA	NA	NA
743	750	orphan	chrIV	+	TATA-less	TAF1-enriched	18	234739	234720	-19	orphan	121.7	0.205196772	NA	NA	NA	NA	NA	NA	NA	NA	NA	NA
744	751	YDL127W	chrIV	+	TATA-containing	TAF1-depleted	228	234921	234873	-48	YDL127W	220.9	0.02323565	0.475932081	0.288689138	0.424255615	1	0.32477541	0.007193581	0.013826876	1	2	TRUE
745	752	YDL126C	chrIV	-	TATA-less	TAF1-enriched	21628	238665	238714	-49	YDL126C	21280.7	0.000265316	0.030638935	0.219849551	0.007905852	0.102671152	0.004363891	0.102671152	0.457099846	0.212019977	3	TRUE
746	753	orphan	chrIV	-	TATA-less	TAF1-enriched	8153	239546	239592	-46	orphan	4344	0.099178411	NA	NA	NA	NA	NA	NA	NA	NA	NA	NA
747	754	YDL125C	chrIV	-	TATA-less	TAF1-depleted	1989	NA	239752	NA	YDL125C	2086.9	0.132501559	NA	NA	NA	NA	NA	NA	NA	NA	NA	NA
748	755	YDL124W	chrIV	+	TATA-containing	TAF1-depleted	32133	240229	240214	-15	YDL124W	2888.9	0.005722063	0.782088559	0.210580315	0.167759286	0.518366957	0.844935359	0.182992431	0.236491772	0.274662372	0	FALSE
749	756	orphan	chrIV	+	TATA-containing	TAF1-enriched	1292	241426	241388	-38	orphan	747.8	0.000535414	0.296925102	0.125054953	0.086545961	0.32977157	0.007147769	0.32977157	0.208330375	0.480358507	1	TRUE
750	757	YDL123W	chrIV	+	TATA-containing	TAF1-enriched	1915	241426	241391	-35	YDL123W	747.8	0.000535414	0.296925102	0.125054953	0.086545961	0.32977157	0.007147769	0.32977157	0.208330375	0.480358507	1	TRUE
751	758	YDL121C	chrIV	-	TATA-less	TAF1-enriched	533	245569	245601	-32	YDL121C	1657.3	0.000674709	0.125923966	0.014577295	0.012189764	0.370979804	0.002823885	0.852934318	0.654569941	0.140226986	3	TRUE
752	759	YDL120W	chrIV	+	TATA-less	TAF1-enriched	351	245880	245843	-37	YDL120W	3688.8	0.002364104	0.448942338	0.040477899	0.040440033	0.416112071	0.058801991	0.870804273	0.528766364	0.143266978	2	TRUE
753	760	YDL119C	chrIV	-	TATA-less	TAF1-enriched	97	247602	247756	-154	YDL119C	277.4	0.003561352	0.238614877	0.580362097	0.231966284	0.039789104	0.224772635	0.493147974	0.376301128	0.026739054	2	TRUE
754	761	CUT481	chrIV	-	TATA-less	TAF1-enriched	27	247965	248028	-63	CUT481	55.8	0.036847756	0.684449493	0.065283833	0.408363336	0.038739517	0.134025203	0.923999202	0.008605036	0.567061691	2	TRUE
755	762	YDL117W	chrIV	+	TATA-less	TAF1-depleted	57	248598	248278	-320	YDL117W	398.1	0.00249688	0.531166055	0.007055094	0.129626734	0.690014308	0.014250019	0.137896856	0.804792594	0.299748586	2	TRUE
756	763	YDL116W	chrIV	+	TATA-less	TAF1-enriched	994	251552	251508	-44	YDL116W	1007.5	0.000884278	0.033643579	0.009057501	0.218687898	0.096473605	0.31318284	0.134659949	0.591632898	1	2	TRUE
757	764	YDL115C	chrIV	-	TATA-less	TAF1-enriched	413	255116	255168	-52	YDL115C	869.6	0.001514867	0.025913531	0.278519498	0.111605651	0.747830805	0.065600241	0.123181584	0.237478404	0.423924896	1	TRUE
758	765	YDL112W	chrIV	+	TATA-less	TAF1-enriched	283	258896	258870	-26	YDL112W	996.3	0.00551549	0.632474596	0.570090643	0.314003511	0.019650178	0.110545326	0.640791629	0.041390486	0.676329338	2	TRUE
759	766	YDL111C	chrIV	-	TATA-less	TAF1-enriched	768	264117	264163	-46	YDL111C	1800.1	0.01442367	0.037304028	0.204449866	0.802971072	1	0.240637968	0.354067493	1	1	1	TRUE
760	767	orphan	chrIV	+	TATA-less	TAF1-enriched	45	264481	264464	-17	orphan	47.3	0.209902062	NA	NA	NA	NA	NA	NA	NA	NA	NA	NA
761	768	YDL110C	chrIV	-	TATA-containing	TAF1-depleted	112	264944	265021	-77	YDL110C	1460.3	0.001147718	0.976718511	0.136660938	0.246513271	0.614609496	0.038090561	0.098051851	0.056288672	0.046586278	2	TRUE
762	769	YDL108W	chrIV	+	TATA-less	TAF1-enriched	98	267683	267675	-8	YDL108W	184.2	0.371700501	NA	NA	NA	NA	NA	NA	NA	NA	NA	NA
763	770	YDL106C	chrIV	-	TATA-less	TAF1-enriched	1218	271911	271950	-39	YDL106C	1582.6	0.000721823	0.029516866	0.474522393	0.024575652	1	0.02222179	0.117162907	1	0.495735662	3	TRUE
764	771	YDL105W	chrIV	+	TATA-less	TAF1-enriched	161	272407	272345	-62	YDL105W	240.4	0.061569211	NA	NA	NA	NA	NA	NA	NA	NA	NA	NA
765	772	YDL104C	chrIV	-	TATA-less	TAF1-depleted	326	274710	274860	-150	YDL104C	98.3	0.030339815	0.442719561	0.084146102	0.319982157	0.07138402	0.565902983	0.143346145	0.565902983	0.715977887	0	FALSE
766	773	YDL103C	chrIV	-	TATA-less	TAF1-depleted	1605	276602	276648	-46	YDL103C	1975.8	0.004519482	0.049835216	0.713053734	0.099968552	0.298006378	0.041648802	0.298006378	0.179090274	0.298006378	2	TRUE
767	774	YDL102W	chrIV	+	TATA-less	TAF1-enriched	233	NA	276786	NA	YDL102W	1171.7	0.001176523	0.002514148	0.952287587	0.127527112	0.219081982	0.021118763	0.882755735	1	0.682057123	2	TRUE
768	775	YDL101C	chrIV	-	TATA-less	TAF1-enriched	96	281847	281869	-22	YDL101C	604.5	0.004681178	0.035109965	0.376646118	0.108261911	0.433714767	0.794494821	0.502945782	0.273951018	0.216902786	1	TRUE
769	776	orphan	chrIV	+	TATA-less	TAF1-enriched	0	282157	282140	-17	orphan	7.1	0.437114402	NA	NA	NA	NA	NA	NA	NA	NA	NA	NA
770	777	YDL100C	chrIV	-	TATA-less	TAF1-enriched	3824	283171	283212	-41	YDL100C	12928	0.041157957	0.46443466	0.028185675	0.258494112	0.43695426	0.10431116	0.427559692	0.844162719	0.007616285	2	TRUE
771	778	YDL097C	chrIV	-	TATA-less	TAF1-enriched	1571	NA	286705	NA	YDL097C	15628.3	0.004084491	0.813069077	0.027657274	0.59315708	0.007555063	0.007944119	0.007555063	0.086549374	0.59315708	4	TRUE
772	779	YDL095W	chrIV	+	TATA-less	TAF1-enriched	4147	287069	287026	-43	YDL095W	3145.6	0.053451105	NA	NA	NA	NA	NA	NA	NA	NA	NA	NA
773	780	YDL093W	chrIV	+	TATA-less	TAF1-enriched	1100	289891	289880	-11	YDL093W	224.3	0.014714272	0.016032751	0.576850931	0.790693433	0.504422787	0.160998258	0.389473448	0.991715613	0.346704852	1	TRUE
774	781	CUT482	chrIV	-	TATA-less	TAF1-enriched	802	292522	292568	-46	CUT482	29.8	0.288166948	NA	NA	NA	NA	NA	NA	NA	NA	NA	NA
775	782	YDL092W	chrIV	+	TATA-less	TAF1-enriched	822	292802	292758	-44	YDL092W	876.1	0.193860132	NA	NA	NA	NA	NA	NA	NA	NA	NA	NA
776	783	YDL091C	chrIV	-	TATA-less	TAF1-enriched	406	294821	294851	-30	YDL091C	300.4	0.138170043	NA	NA	NA	NA	NA	NA	NA	NA	NA	NA
777	784	YDL089W	chrIV	+	TATA-less	TAF1-enriched	76	296744	296598	-146	YDL089W	514.2	0.014314424	0.146661605	0.002090809	0.854919666	0.529982515	0.688963695	0.594286038	0.060360435	0.242557645	1	TRUE
778	785	YDL088C	chrIV	-	TATA-less	TAF1-depleted	1277	300075	300131	-56	YDL088C	309	0.000621379	0.431689798	0.210474822	0.193599699	0.5391412	0.08184578	0.067792203	0.909824948	0.204761608	0	FALSE
779	786	YDL087C	chrIV	-	TATA-less	TAF1-enriched	910	300979	301018	-39	YDL087C	208.2	0.226697179	NA	NA	NA	NA	NA	NA	NA	NA	NA	NA
780	787	YDL086W	chrIV	+	TATA-containing	TAF1-enriched	283	301425	301403	-22	YDL086W	1703.6	0.004691146	0.19365076	0.01016494	0.250620246	0.009184061	0.127276471	0.022518438	0.834530545	0.009184061	4	TRUE
781	788	YDL086C-A	chrIV	-	TATA-less	TAF1-enriched	124	302130	302183	-53	YDL086C-A	104.4	0.074401151	NA	NA	NA	NA	NA	NA	NA	NA	NA	NA
782	789	YDL085C-A	chrIV	-	TATA-less	TAF1-enriched	601	302694	302726	-32	YDL085C-A	3012.5	0.001322109	0.056756191	0.241028167	0.196236097	0.465109985	0.06360377	0.635789485	0.540930057	0.03082943	1	TRUE
783	790	CUT483	chrIV	-	TATA-containing	TAF1-enriched	82	304804	304846	-42	CUT483	102.2	0.021270903	0.526145956	0.039030887	0.865353435	0.241680969	0.859344041	0.013789221	0.975052446	0.059924687	2	TRUE
784	791	YDL084W	chrIV	+	TATA-less	TAF1-enriched	943	305115	305093	-22	YDL084W	10526.6	0.018370539	0.056659527	0.187005777	0.664558422	0.135278005	0.819590722	0.834616887	0.575607913	0.664558422	0	FALSE
785	792	YDL083C	chrIV	-	TATA-less	TAF1-enriched	14846	307769	307807	-38	YDL083C	14688.1	0.000411351	0.043270427	0.171560092	0.029151281	0.494143619	0.004859237	0.769500338	0.377400631	0.125952349	3	TRUE
786	793	YDL082W	chrIV	+	TATA-less	TAF1-enriched	18514	308427	308386	-41	YDL082W	9379.6	0.086140019	NA	NA	NA	NA	NA	NA	NA	NA	NA	NA
787	794	YDL081C	chrIV	-	TATA-less	TAF1-enriched	102114	310120	310180	-60	YDL081C	114327.8	0.00430034	0.964953558	0.086603125	0.364678336	0.238304682	0.241892647	0.034876666	0.10396045	0.093620888	1	TRUE
788	795	CUT054	chrIV	+	TATA-less	TAF1-depleted	11	NA	310432	NA	CUT054	32.2	0.521656029	NA	NA	NA	NA	NA	NA	NA	NA	NA	NA
789	796	YDL080C	chrIV	-	TATA-less	TAF1-depleted	91	312457	312609	-152	YDL080C	387.6	0.001020778	0.255870689	0.015439126	0.743259802	0.325795099	0.76723294	0.43181182	0.108090168	0.042280821	2	TRUE
790	797	ST0443	chrIV	+	TATA-less	TAF1-enriched	15	NA	312866	NA	ST0443	415.3	0.26803032	NA	NA	NA	NA	NA	NA	NA	NA	NA	NA
791	798	YDL078C	chrIV	-	TATA-containing	TAF1-enriched	419	316375	316451	-76	YDL078C	1481.3	0.00059223	0.668709305	0.030074171	0.201611083	0.07277636	0.099236251	0.037052331	0.122533137	0.201611083	2	TRUE
792	799	YDL077C	chrIV	-	TATA-less	TAF1-enriched	313	320264	320254	10	YDL077C	374.5	0.723587874	NA	NA	NA	NA	NA	NA	NA	NA	NA	NA
793	800	YDL075W	chrIV	+	TATA-less	TAF1-enriched	5460	322257	322198	-59	YDL075W	95834.6	0.000369148	0.022524238	0.522956559	0.045572991	0.045572991	0.002791626	0.002708758	0.366317888	0.161654451	5	TRUE
794	801	orphan	chrIV	+	TATA-less	TAF1-depleted	171	322941	322861	-80	orphan	826.4	0.831248989	NA	NA	NA	NA	NA	NA	NA	NA	NA	NA
795	802	ST0447	chrIV	+	TATA-containing	TAF1-depleted	10	323918	323790	-128	ST0447	88	0.019150096	0.1761601	0.388608683	0.987008391	0.987008391	0.020756773	0.42493952	0.178501098	0.42493952	1	TRUE
796	803	YDL074C	chrIV	-	TATA-less	TAF1-enriched	203	326162	326228	-66	YDL074C	518.6	0.000387461	0.323472497	0.172296365	0.073552631	0.479068426	0.017706937	0.327976494	0.131233039	0.096484504	1	TRUE
797	804	YDL073W	chrIV	+	TATA-less	TAF1-enriched	1222	326466	326433	-33	YDL073W	158.7	0.000724309	0.578188972	0.110727012	0.011322514	0.630608587	0.001909199	0.42287076	0.291259884	0.0434191	3	TRUE
798	805	YDL072C	chrIV	-	TATA-less	TAF1-enriched	23312	330440	330491	-51	YDL072C	4382.8	0.004252992	0.700829897	0.078669981	0.004168028	0.149677353	0.117037309	0.571015586	0.241890753	0.095455835	1	TRUE
799	806	ST0450	chrIV	+	TATA-less	TAF1-enriched	37	330853	330733	-120	ST0450	77.3	0.111084001	NA	NA	NA	NA	NA	NA	NA	NA	NA	NA
800	807	YDL070W	chrIV	+	TATA-containing	TAF1-depleted	3505	331097	331005	-92	YDL070W	7754.7	0.000760388	0.70533824	0.476081603	0.323278955	0.023682079	0.043842796	0.118460101	0.012823365	0.264767841	3	TRUE
801	808	YDL067C	chrIV	-	TATA-less	TAF1-enriched	1969	334382	334442	-60	YDL067C	1673.2	0.005814139	0.04823935	0.125267768	0.433533184	0.692387677	0.002106025	0.692387677	0.410259713	0.008690645	3	TRUE
802	809	YDL066W	chrIV	+	TATA-less	TAF1-enriched	33255	334849	334811	-38	YDL066W	2788.2	0.005336943	0.066109576	0.241634498	0.39248882	1	0.279720806	1	1	0.022589888	1	TRUE
803	810	YDL065C	chrIV	-	TATA-less	TAF1-enriched	106	337252	337288	-36	YDL065C	339.5	0.112080996	NA	NA	NA	NA	NA	NA	NA	NA	NA	NA
804	811	YDL063C	chrIV	-	TATA-less	TAF1-enriched	639	340189	340221	-32	YDL063C	1365.7	0.00347318	0.136083504	0.29948912	0.038921914	0.736746702	0.002075301	0.642484842	0.363188896	0.173619113	2	TRUE
805	812	YDL061C	chrIV	-	TATA-less	TAF1-enriched	806	341196	341251	-55	YDL061C	988	0.006942375	0.805107731	0.30963064	0.113648101	0.179105918	0.023320051	0.336088027	0.893860753	0.164161243	1	TRUE
806	813	YDL060W	chrIV	+	TATA-less	TAF1-enriched	247	341625	341582	-43	YDL060W	1649.7	0.002758401	0.006336963	0.476386764	0.763672562	0.2452288	0.270673152	0.751309188	0.456372644	0.393532418	1	TRUE
807	814	YDL059C	chrIV	-	TATA-less	TAF1-enriched	229	345038	345056	-18	YDL059C	199.9	0.063058829	NA	NA	NA	NA	NA	NA	NA	NA	NA	NA
808	815	YDL058W	chrIV	+	TATA-less	TAF1-enriched	2524	345667	345599	-68	YDL058W	1452.6	0.000664379	0.15100486	0.159520754	0.051145098	0.515636169	0.004986737	0.495118925	0.942181321	0.190805712	1	TRUE
809	816	YDL057W	chrIV	+	TATA-less	TAF1-enriched	208	351480	351426	-54	YDL057W	176.8	0.013356394	0.099188347	0.219031905	0.282154094	0.435427592	0.694940617	0.209076067	0.239404126	0.506050847	0	FALSE
810	817	CUT487	chrIV	-	TATA-less	TAF1-enriched	42	352579	352610	-31	CUT487	69.1	0.495675615	NA	NA	NA	NA	NA	NA	NA	NA	NA	NA
811	818	YDL056W	chrIV	+	TATA-less	TAF1-enriched	611	352820	352765	-55	YDL056W	526.3	0.001023255	0.380603126	0.203608053	0.109424748	0.262479942	0.016518202	0.262479942	0.255692217	0.109424748	1	TRUE
812	819	YDL055C	chrIV	-	TATA-containing	TAF1-depleted	8385	356878	356908	-30	YDL055C	13704.5	0.00137368	0.045743786	0.002470808	0.384083794	0.470795319	0.261150091	0.470795319	0.043112491	0.384083794	3	TRUE
813	820	orphan	chrIV	-	TATA-less	TAF1-enriched	63	357580	357592	-12	orphan	13.3	0.520221793	NA	NA	NA	NA	NA	NA	NA	NA	NA	NA
814	821	orphan	chrIV	+	TATA-less	TAF1-enriched	32	358429	358435	6	orphan	21.6	0.858631956	NA	NA	NA	NA	NA	NA	NA	NA	NA	NA
815	822	YDL054C	chrIV	-	TATA-less	TAF1-enriched	5170	361317	361363	-46	YDL054C	1706.8	0.009134428	1	0.005658943	0.545742042	0.545742042	0.142273119	0.545742042	0.467177294	0.545742042	1	TRUE
816	823	YDL053C	chrIV	-	TATA-containing	TAF1-depleted	253	362406	362454	-48	YDL053C	589.1	0.00047066	0.246812065	0.311763327	0.436059872	0.021196067	0.225194648	0.013698871	0.202299724	0.436059872	2	TRUE
817	824	YDL052C	chrIV	-	TATA-less	TAF1-enriched	472	363581	363619	-38	YDL052C	762.6	0.046031951	0.057063112	1	0.084946434	0.352243148	0.285743557	0.352243148	0.229772974	0.352243148	0	FALSE
818	825	YDL051W	chrIV	+	TATA-less	TAF1-enriched	1490	364097	363929	-168	YDL051W	4900.6	0.003785371	0.575077256	0.497385882	0.013721938	0.228608923	0.00146461	0.789741247	0.941789834	0.013721938	3	TRUE
819	826	YDL049C	chrIV	-	TATA-less	TAF1-depleted	65	NA	365940	NA	YDL049C	186.1	0.11589423	NA	NA	NA	NA	NA	NA	NA	NA	NA	NA
820	827	orphan	chrIV	-	TATA-less	TAF1-enriched	237	366538	366759	-221	orphan	85.8	0.238831824	NA	NA	NA	NA	NA	NA	NA	NA	NA	NA
821	828	CUT489	chrIV	-	TATA-less	TAF1-enriched	1981	368155	368261	-106	CUT489	7256	0.030593277	0.192784157	0.404217332	0.607973423	0.44162467	0.230019417	0.003182182	0.089698861	0.108928856	1	TRUE
822	829	orphan	chrIV	+	TATA-less	TAF1-enriched	26	369002	368859	-143	orphan	13.9	0.284394633	NA	NA	NA	NA	NA	NA	NA	NA	NA	NA
823	830	YDL047W	chrIV	+	TATA-less	TAF1-enriched	2375	369799	369626	-173	YDL047W	1420.4	0.035785064	0.70211035	0.377435874	0.073660595	0.393065367	0.007281445	0.529697588	0.66219847	0.073660595	1	TRUE
824	831	YDL046W	chrIV	+	TATA-containing	TAF1-enriched	18279	371227	371178	-49	YDL046W	1787.2	0.001144916	0.694252229	0.205288786	0.041210206	0.160477154	0.011325227	0.125755396	0.284326588	0.22547927	2	TRUE
825	832	ST4129	chrIV	-	TATA-containing	TAF1-enriched	102	371965	372002	-37	ST4129	297.8	0.010849126	0.086191554	0.017091889	0.661354349	0.017248529	0.530525058	0.00693511	0.130671159	0.421161284	3	TRUE
826	833	YDL045W-A	chrIV	+	TATA-containing	TAF1-enriched	7257	372254	372204	-50	YDL045W-A	254.3	0.00846842	0.33638429	0.122597886	0.009969776	0.402208154	0.006753446	0.649294293	0.765180442	0.033162454	3	TRUE
827	834	YDL045C	chrIV	-	TATA-less	TAF1-enriched	116	373700	373759	-59	YDL045C	2675.7	0.031211357	0.232526299	0.489445122	0.020639868	0.182322363	0.097909759	0.496678335	0.920367482	0.52993797	1	TRUE
828	835	orphan	chrIV	-	TATA-less	TAF1-enriched	102	NA	375299	NA	orphan	197.5	0.076493941	NA	NA	NA	NA	NA	NA	NA	NA	NA	NA
829	836	YDL043C	chrIV	-	TATA-less	TAF1-enriched	287	376463	376518	-55	YDL043C	173.1	0.849455604	NA	NA	NA	NA	NA	NA	NA	NA	NA	NA
830	837	YDL042C	chrIV	-	TATA-less	TAF1-enriched	974	378454	378492	-38	YDL042C	700.8	0.001185248	0.307957137	0.054540415	0.411267692	0.719610222	0.01939753	0.539047312	0.190895973	0.162704725	1	TRUE
831	838	YDL040C	chrIV	-	TATA-less	TAF1-enriched	12373	381428	381484	-56	YDL040C	1182	0.007411099	0.021216742	0.496874556	0.668097941	0.777066952	0.048393448	0.668097941	0.433455374	0.432622696	2	TRUE
832	839	ST0462	chrIV	+	TATA-less	TAF1-enriched	42	381860	381672	-188	ST0462	13.1	0.122738384	NA	NA	NA	NA	NA	NA	NA	NA	NA	NA
833	840	YDL037C	chrIV	-	TATA-less	TAF1-enriched	1564	385748	385765	-17	YDL037C	104.4	0.036396288	0.918894629	0.094355058	0.158466566	0.304040331	0.861188077	0.153815622	0.571577358	0.351234411	0	FALSE
834	841	orphan	chrIV	+	TATA-less	TAF1-enriched	11	NA	387245	NA	orphan	76.7	0.222774831	NA	NA	NA	NA	NA	NA	NA	NA	NA	NA
835	842	YDL036C	chrIV	-	TATA-less	TAF1-enriched	10	388842	388886	-44	YDL036C	602.1	0.005796837	0.177431648	0.004882441	0.955177163	0.045570309	0.314651812	0.093313772	0.017604627	0.705885522	3	TRUE
836	843	YDL035C	chrIV	-	TATA-less	TAF1-enriched	244	392281	392350	-69	YDL035C	141.8	0.020367993	0.930534522	0.039105142	0.069622652	0.726234209	0.484809278	0.069622652	0.484809278	0.293526112	1	TRUE
837	844	YDL033C	chrIV	-	TATA-less	TAF1-enriched	137	393905	393947	-42	YDL033C	307.5	0.014355665	0.029942951	0.31856316	0.143693628	0.135094784	0.061913517	0.228169262	0.506823542	0.162142411	1	TRUE
838	845	YDL031W	chrIV	+	TATA-less	TAF1-enriched	219	394210	394144	-66	YDL031W	791.7	0.001486386	0.032950686	0.009319085	0.968089879	0.044621567	0.642070871	0.006682289	0.003032491	0.648356586	5	TRUE
839	846	YDL030W	chrIV	+	TATA-less	TAF1-enriched	154	397484	397458	-26	YDL030W	210.7	0.014566186	0.432469413	0.322915428	0.063575746	0.10951879	0.797200319	0.02973346	0.781373283	0.421304063	1	TRUE
840	847	YDL029W	chrIV	+	TATA-less	TAF1-enriched	1010	399386	399312	-74	YDL029W	1238.7	0.0019695	0.024673952	0.378334911	0.872217772	0.82184008	0.030809771	0.499334786	0.00888773	0.948702022	3	TRUE
841	848	YDL028C	chrIV	-	TATA-less	TAF1-enriched	360	403412	403415	-3	YDL028C	254.6	0.010819356	0.118766712	0.000798804	0.77375076	0.103311047	0.397920807	0.09047602	0.44554202	0.823076724	1	TRUE
842	849	YDL027C	chrIV	-	TATA-less	TAF1-enriched	968	404954	404990	-36	YDL027C	570.9	0.018981405	0.05608803	0.100650548	0.595179222	0.688749303	0.022017507	0.048830753	0.61989087	0.235895018	2	TRUE
843	850	YDL025W-A	chrIV	+	TATA-containing	TAF1-enriched	165	405428	405225	-203	YDL025W-A	44.9	0.167242012	NA	NA	NA	NA	NA	NA	NA	NA	NA	NA
844	851	YDL025C	chrIV	-	TATA-less	TAF1-enriched	1107	407226	407353	-127	YDL025C	653.9	0.024256766	0.319559039	0.349304229	0.69610825	0.254624107	0.614095777	0.034375631	0.001745309	0.69610825	2	TRUE
845	852	ST0466	chrIV	+	TATA-less	TAF1-enriched	89	407798	407607	-191	ST0466	25.4	0.366842038	NA	NA	NA	NA	NA	NA	NA	NA	NA	NA
846	853	orphan	chrIV	-	TATA-containing	TAF1-depleted	3	408042	408073	-31	orphan	19.2	0.300621708	NA	NA	NA	NA	NA	NA	NA	NA	NA	NA
847	854	orphan	chrIV	-	TATA-less	TAF1-enriched	58	411087	411168	-81	orphan	19.8	0.029591136	0.243297396	0.144708102	0.792074202	0.559788818	0.1054164	0.401590028	0.36959494	0.288026514	0	FALSE
848	855	YDL022W	chrIV	+	TATA-containing	TAF1-depleted	53299	411894	411751	-143	YDL022W	899.4	0.16037225	NA	NA	NA	NA	NA	NA	NA	NA	NA	NA
849	856	CUT491	chrIV	-	TATA-less	TAF1-enriched	158	414719	414759	-40	CUT491	59.9	0.025048712	0.352713363	0.316370762	0.656036129	0.020211205	0.622113986	0.011961223	0.18875065	0.293785354	2	TRUE
850	857	YDL020C	chrIV	-	TATA-containing	TAF1-enriched	41	NA	416952	NA	YDL020C	619.2	0.031962437	0.825312902	0.350405983	0.233921692	0.333477635	0.000346746	0.392251949	1	1	1	TRUE
851	858	CUT057	chrIV	+	TATA-less	TAF1-enriched	3	417303	417268	-35	CUT057	17.9	0.4919394	NA	NA	NA	NA	NA	NA	NA	NA	NA	NA
852	859	YDL019C	chrIV	-	TATA-less	TAF1-enriched	577	421489	421645	-156	YDL019C	267.8	0.050896271	NA	NA	NA	NA	NA	NA	NA	NA	NA	NA
853	860	YDL018C	chrIV	-	TATA-less	TAF1-depleted	347	423520	423570	-50	YDL018C	721.1	0.019669372	0.086331519	0.350943916	0.097664253	0.650395999	0.004815987	0.310798898	0.974540445	0.710779109	1	TRUE
854	861	CUT059	chrIV	+	TATA-containing	TAF1-enriched	15	423951	423834	-117	CUT059	27.4	0.834752791	NA	NA	NA	NA	NA	NA	NA	NA	NA	NA
855	862	YDL017W	chrIV	+	TATA-less	TAF1-enriched	130	424132	424123	-9	YDL017W	194.1	0.167761637	NA	NA	NA	NA	NA	NA	NA	NA	NA	NA
856	863	YDL015C	chrIV	-	TATA-less	TAF1-enriched	6636	426933	426987	-54	YDL015C	9884.7	0.069766917	NA	NA	NA	NA	NA	NA	NA	NA	NA	NA
857	864	CUT492	chrIV	-	TATA-less	TAF1-enriched	73	NA	428712	NA	CUT492	18.2	0.487593572	NA	NA	NA	NA	NA	NA	NA	NA	NA	NA
858	865	YDL013W	chrIV	+	TATA-less	TAF1-enriched	33	428960	428932	-28	YDL013W	247.2	0.072909376	NA	NA	NA	NA	NA	NA	NA	NA	NA	NA
859	866	YDL012C	chrIV	-	TATA-containing	TAF1-enriched	26002	431486	431530	-44	YDL012C	5007.3	0.000778037	0.248472122	0.374677969	0.112201064	0.098288346	0.022563007	0.085789197	0.33578844	0.112201064	1	TRUE
860	867	orphan	chrIV	-	TATA-less	TAF1-enriched	442	431721	431837	-116	orphan	236.7	0.502223892	NA	NA	NA	NA	NA	NA	NA	NA	NA	NA
861	868	orphan	chrIV	-	TATA-less	TAF1-depleted	491	431749	432014	-265	orphan	228	0.41299787	NA	NA	NA	NA	NA	NA	NA	NA	NA	NA
862	869	YDL010W	chrIV	+	TATA-less	TAF1-depleted	120	NA	432302	NA	YDL010W	377.4	0.385524584	NA	NA	NA	NA	NA	NA	NA	NA	NA	NA
863	870	YDL008W	chrIV	+	TATA-less	TAF1-enriched	218	433561	433476	-85	YDL008W	512.2	0.031376801	0.988337231	0.24817518	0.022976824	0.011405445	0.013112663	0.072903344	0.967020929	0.072903344	3	TRUE
864	871	ST4152	chrIV	-	TATA-less	TAF1-enriched	84	433902	434058	-156	ST4152	255.6	0.020149698	0.455338763	0.035040557	0.390955248	0.016517699	0.64137144	0.853695381	0.16862202	0.613481137	2	TRUE
865	872	tT(AGU)D	chrIV	-	TATA-less	-	161	434302	434347	-45	tT(AGU)D	195.2	0.854151702	NA	NA	NA	NA	NA	NA	NA	NA	NA	NA
866	873	YDL007W	chrIV	+	TATA-less	TAF1-enriched	372	438050	438009	-41	YDL007W	2362.9	0.000414333	0.305579751	0.093636018	0.013038101	0.864970984	0.005672767	0.395186705	0.82623462	0.233909446	2	TRUE
867	874	YDL006W	chrIV	+	TATA-less	TAF1-depleted	191	439787	439622	-165	YDL006W	256.3	0.027320013	0.176208509	0.256638133	0.571691548	0.385253549	0.39335939	0.376594454	0.991794998	0.095947988	0	FALSE
868	875	YDL005C	chrIV	-	TATA-less	TAF1-depleted	419	442309	442334	-25	YDL005C	162.6	0.935047876	NA	NA	NA	NA	NA	NA	NA	NA	NA	NA
869	876	YDL004W	chrIV	+	TATA-less	TAF1-enriched	1304	443014	442986	-28	YDL004W	4212.8	0.000190466	0.832978001	0.165805734	0.128995264	0.165725742	0.003517888	0.165725742	0.073549168	0.105860829	1	TRUE
870	877	orphan	chrIV	-	TATA-less	TAF1-enriched	0	443825	443829	-4	orphan	26.8	0.38743838	NA	NA	NA	NA	NA	NA	NA	NA	NA	NA
871	878	ST4154	chrIV	-	TATA-less	TAF1-depleted	32	444234	444250	-16	ST4154	74.3	0.029292337	0.359660082	0.008495388	0.041476062	0.14282714	0.434581796	0.823545546	0.805101636	0.151718281	2	TRUE
872	879	YDL003W	chrIV	+	TATA-containing	TAF1-depleted	156	444683	444559	-124	YDL003W	396	0.098676524	NA	NA	NA	NA	NA	NA	NA	NA	NA	NA
873	880	YDL002C	chrIV	-	TATA-less	TAF1-enriched	287	447458	447663	-205	YDL002C	1262.8	0.011682773	0.380714059	0.045335576	0.785568256	0.194860729	0.027053108	0.575381249	0.91772003	0.194860729	2	TRUE
874	881	YDL001W	chrIV	+	TATA-less	TAF1-enriched	1416	447956	447926	-30	YDL001W	242.7	0.402183679	NA	NA	NA	NA	NA	NA	NA	NA	NA	NA
875	882	YDR001C	chrIV	-	TATA-containing	TAF1-depleted	2986	452502	452594	-92	YDR001C	4520.6	0.001108047	0.041211157	0.012141501	0.366800393	0.221728088	0.337615187	0.260120231	0.16394234	0.549177495	2	TRUE
876	883	YDR002W	chrIV	+	TATA-less	TAF1-enriched	1185	453055	453016	-39	YDR002W	10498.6	0.000328539	0.126663317	0.054838804	0.065695933	0.367945935	0.033237561	0.367945935	0.465203184	0.144826026	1	TRUE
877	884	YDR003W	chrIV	+	TATA-less	TAF1-depleted	141	454106	454085	-21	YDR003W	906.3	0.008050756	0.211703401	0.078889429	0.848606181	0.873605097	0.017203827	1	0.080868782	0.545506213	1	TRUE
878	885	YDR004W	chrIV	+	TATA-less	TAF1-enriched	77	455304	455240	-64	YDR004W	229.2	0.059127148	NA	NA	NA	NA	NA	NA	NA	NA	NA	NA
879	886	YDR005C	chrIV	-	TATA-less	TAF1-depleted	1900	458177	458211	-34	YDR005C	728.6	0.07584619	NA	NA	NA	NA	NA	NA	NA	NA	NA	NA
880	887	YDR006C	chrIV	-	TATA-less	TAF1-enriched	2574	461164	461286	-122	YDR006C	353.1	0.263648584	NA	NA	NA	NA	NA	NA	NA	NA	NA	NA
881	888	YDR007W	chrIV	+	TATA-containing	TAF1-depleted	99	NA	461632	NA	YDR007W	32.8	0.017916407	0.430728682	0.121933792	0.181978813	0.904576572	0.005171935	0.695342891	0.439028134	0.091730129	1	TRUE
882	889	orphan	chrIV	+	TATA-less	TAF1-enriched	4	465173	464986	-187	orphan	1.3	0.668558066	NA	NA	NA	NA	NA	NA	NA	NA	NA	NA
883	890	YDR011W	chrIV	+	TATA-less	TAF1-depleted	129	465744	465594	-150	YDR011W	388.8	0.040107172	0.19557939	0.078476144	0.104190229	0.632719256	0.099917523	0.293081082	0.434511144	0.104190229	0	FALSE
884	891	YDR012W	chrIV	+	TATA-less	TAF1-depleted	41561	471866	471815	-51	YDR012W	12581.5	0.071345148	NA	NA	NA	NA	NA	NA	NA	NA	NA	NA
885	892	YDR013W	chrIV	+	TATA-less	TAF1-enriched	1465	473187	473141	-46	YDR013W	616.1	0.029103619	0.057584115	0.002031198	0.42586746	0.42586746	0.737117813	0.464607857	0.614606584	0.157418017	1	TRUE
886	893	YDR016C	chrIV	-	TATA-less	TAF1-enriched	138	478749	478791	-42	YDR016C	1272.5	0.000569917	0.214726669	0.056451429	0.496792956	1	0.028291513	0.118063832	0.153985808	1	1	TRUE
887	894	orphan	chrIV	+	TATA-less	TAF1-enriched	3	481789	481738	-51	orphan	0.9	0.443714844	NA	NA	NA	NA	NA	NA	NA	NA	NA	NA
888	895	orphan	chrIV	+	TATA-less	TAF1-enriched	149	481986	481984	-2	orphan	28.8	0.158988913	NA	NA	NA	NA	NA	NA	NA	NA	NA	NA
889	896	CUT062	chrIV	+	TATA-less	TAF1-enriched	21	NA	482589	NA	CUT062	14.9	0.155723777	NA	NA	NA	NA	NA	NA	NA	NA	NA	NA
890	897	YDR019C	chrIV	-	TATA-containing	TAF1-enriched	289	485241	485290	-49	YDR019C	1111.3	0.004522646	0.302436336	0.70570481	0.176248825	0.435616797	0.000479651	0.961930145	0.109121956	0.00950274	2	TRUE
891	898	YDR020C	chrIV	-	TATA-less	TAF1-depleted	210	486500	486566	-66	YDR020C	245.6	0.045843099	0.466749553	0.494467791	0.33300539	0.095375795	0.592220199	0.072199317	0.288807837	0.105471616	0	FALSE
892	899	YDR022C	chrIV	-	TATA-less	TAF1-enriched	346	488836	488881	-45	YDR022C	75.7	0.094965867	NA	NA	NA	NA	NA	NA	NA	NA	NA	NA
893	900	tV(UAC)D	chrIV	+	TATA-less	-	0	489139	488883	-256	tV(UAC)D	0.2	0.367879441	NA	NA	NA	NA	NA	NA	NA	NA	NA	NA
894	901	ST4168	chrIV	-	TATA-containing	TAF1-enriched	208	489142	489210	-68	ST4168	120.2	0.483845801	NA	NA	NA	NA	NA	NA	NA	NA	NA	NA
895	902	YDR023W	chrIV	+	TATA-containing	TAF1-enriched	3496	489534	489474	-60	YDR023W	11888.5	0.009002966	0.155440319	0.286680785	0.030380407	0.565221388	0.060384576	0.498664728	0.484688641	0.030380407	2	TRUE
896	903	YDR025W	chrIV	+	TATA-less	TAF1-enriched	118633	491537	491501	-36	YDR025W	17171.3	0.006079502	0.005115602	0.068563393	0.004687019	0.360130473	0.046557471	0.158606406	0.462710957	0.638408824	3	TRUE
897	904	YDR027C	chrIV	-	TATA-less	TAF1-enriched	65	497394	497440	-46	YDR027C	213.2	0.004840449	0.26116634	0.004856621	0.200953038	0.10299115	0.885136877	0.027383944	0.112045705	0.481829824	2	TRUE
898	905	YDR028C	chrIV	-	TATA-less	TAF1-enriched	1857	501327	501373	-46	YDR028C	1866.2	0.015555584	0.641554091	0.190434529	0.774225563	0.974573764	0.127897598	0.33898449	0.087709231	0.503290362	0	FALSE
899	906	CUT064	chrIV	+	TATA-less	TAF1-enriched	21	501563	501508	-55	CUT064	61.8	0.132710109	NA	NA	NA	NA	NA	NA	NA	NA	NA	NA
900	907	YDR032C	chrIV	-	TATA-containing	TAF1-depleted	31578	504644	504757	-113	YDR032C	2510.4	0.001231227	0.28839154	0.269035474	0.069344143	0.503421716	0.003984134	0.389628359	0.217189823	0.001997007	2	TRUE
901	908	orphan	chrIV	+	TATA-less	TAF1-enriched	32	506263	506130	-133	orphan	4.3	0.676168975	NA	NA	NA	NA	NA	NA	NA	NA	NA	NA
902	909	ST0505	chrIV	+	TATA-less	TAF1-enriched	133	506443	506361	-82	ST0505	80.8	0.120974572	NA	NA	NA	NA	NA	NA	NA	NA	NA	NA
903	910	YDR033W	chrIV	+	TATA-containing	TAF1-depleted	18301	508209	507901	-308	YDR033W	4365.2	0.000436623	0.018283809	0.59999728	0.253897402	0.198950267	0.032993937	0.054501055	0.828749397	0.253897402	2	TRUE
904	911	YDR034C	chrIV	-	TATA-less	TAF1-enriched	475	512208	512248	-40	YDR034C	88.1	0.109004005	NA	NA	NA	NA	NA	NA	NA	NA	NA	NA
905	912	orphan	chrIV	+	TATA-less	TAF1-depleted	15	NA	512559	NA	orphan	473.6	0.002520987	0.456514152	0.071947895	0.095848753	1	0.025242462	0.153459473	1	0.475407169	1	TRUE
906	913	orphan	chrIV	-	TATA-less	TAF1-enriched	1483	512715	512744	-29	orphan	60.2	0.069364967	NA	NA	NA	NA	NA	NA	NA	NA	NA	NA
907	914	tL(UAA)D	chrIV	+	TATA-less	-	229	519755	519731	-24	tL(UAA)D	50.7	0.380047698	NA	NA	NA	NA	NA	NA	NA	NA	NA	NA
908	915	orphan	chrIV	+	TATA-less	TAF1-enriched	35	NA	519996	NA	orphan	372.7	0.175210382	NA	NA	NA	NA	NA	NA	NA	NA	NA	NA
909	916	tQ(UUG)D1	chrIV	+	TATA-less	-	592	520976	520961	-15	tQ(UUG)D1	19	0.689208787	NA	NA	NA	NA	NA	NA	NA	NA	NA	NA
910	917	YDR035W	chrIV	+	TATA-less	TAF1-depleted	24556	521895	521737	-158	YDR035W	1910.2	0.051456953	NA	NA	NA	NA	NA	NA	NA	NA	NA	NA
911	918	YDR036C	chrIV	-	TATA-less	TAF1-enriched	2369	524735	524764	-29	YDR036C	383.4	0.006946832	0.834491451	0.038030873	0.039399829	0.471918906	0.213025466	0.030921526	0.353049636	0.252442469	3	TRUE
912	919	YDR037W	chrIV	+	TATA-containing	TAF1-enriched	5852	525452	525391	-61	YDR037W	7199.9	0.004163363	0.037295803	0.177262269	0.641290992	0.760182419	0.950387038	0.12695851	0.868218332	0.064672852	1	TRUE
913	920	YDR041W	chrIV	+	TATA-less	TAF1-enriched	260	539830	539798	-32	YDR041W	779.5	0.123605271	NA	NA	NA	NA	NA	NA	NA	NA	NA	NA
914	921	orphan	chrIV	-	TATA-containing	TAF1-enriched	8761	541520	541700	-180	orphan	2823.5	0.185362499	NA	NA	NA	NA	NA	NA	NA	NA	NA	NA
915	922	ST0511	chrIV	+	TATA-less	TAF1-enriched	36	542397	542304	-93	ST0511	55.4	0.073435096	NA	NA	NA	NA	NA	NA	NA	NA	NA	NA
916	923	CUT065	chrIV	+	TATA-containing	TAF1-enriched	982	542870	542709	-161	CUT065	159.8	0.382661443	NA	NA	NA	NA	NA	NA	NA	NA	NA	NA
917	924	YDR043C	chrIV	-	TATA-containing	TAF1-depleted	1607	543414	543534	-120	YDR043C	623.4	0.001198126	0.66120023	0.242530784	0.092898677	0.345083093	0.065958444	0.28363364	0.021835482	0.081104535	1	TRUE
918	925	ST0513	chrIV	+	TATA-less	TAF1-enriched	230	544094	544085	-9	ST0513	96.4	0.185767606	NA	NA	NA	NA	NA	NA	NA	NA	NA	NA
919	926	orphan	chrIV	-	TATA-less	TAF1-enriched	124	545570	545670	-100	orphan	33.6	0.014757427	0.424954104	0.003083186	0.181926223	0.070051285	0.006361768	0.588993284	0.411868484	0.324503901	2	TRUE
920	927	YDR044W	chrIV	+	TATA-containing	TAF1-depleted	2966	546701	546492	-209	YDR044W	10429.8	0.031330042	0.138601062	0.059082978	0.750399138	0.610765556	0.128630559	0.484021706	0.36626007	0.702657391	0	FALSE
921	928	YDR045C	chrIV	-	TATA-less	TAF1-enriched	208	548406	548465	-59	YDR045C	306	0.051287546	NA	NA	NA	NA	NA	NA	NA	NA	NA	NA
922	929	YDR046C	chrIV	-	TATA-less	TAF1-depleted	1019	550661	550666	-5	YDR046C	1128.2	0.003139404	0.016508363	0.00345838	0.461337199	0.008631723	0.341600893	0.006481158	0.238628592	0.461337199	4	TRUE
923	930	orphan	chrIV	+	TATA-less	TAF1-depleted	347	551494	551451	-43	orphan	128.8	0.013528324	0.836781536	0.09933297	0.038323985	0.119816459	0.003695541	0.119816459	0.669661757	0.056110513	2	TRUE
924	931	YDR047W	chrIV	+	TATA-less	TAF1-enriched	555	NA	551715	NA	YDR047W	1201.8	0.012574115	0.672539512	0.502580826	0.172230693	0.083223142	0.092986016	0.260341233	0.307596389	0.072471264	0	FALSE
925	932	YDR049W	chrIV	+	TATA-less	TAF1-enriched	48	553244	553226	-18	YDR049W	264.1	0.077404343	NA	NA	NA	NA	NA	NA	NA	NA	NA	NA
926	933	CUT496	chrIV	-	TATA-containing	TAF1-depleted	50	NA	555780	NA	CUT496	1405.8	0.974249759	NA	NA	NA	NA	NA	NA	NA	NA	NA	NA
927	935	YDR050C	chrIV	-	TATA-less	TAF1-depleted	4037	556408	556502	-94	YDR050C	54535.7	0.007059063	0.018895137	0.080807031	0.440411863	0.676024109	0.30927261	0.046257477	0.835619472	0.821963542	2	TRUE
928	936	ST0517	chrIV	+	TATA-less	TAF1-enriched	100	557047	557014	-33	ST0517	62.2	0.016799248	0.485431782	0.861552496	0.315870785	0.03161525	0.621819904	0.026902963	0.030922535	0.786663895	3	TRUE
929	937	YDR051C	chrIV	-	TATA-less	TAF1-enriched	69	558054	558106	-52	YDR051C	271.1	0.01402359	0.024291874	0.105354563	0.32523235	0.83393751	0.428846342	0.017754142	0.128542616	0.239080004	2	TRUE
930	938	YDR052C	chrIV	-	TATA-less	TAF1-enriched	31	560727	560779	-52	YDR052C	320.5	0.005637361	0.014645367	1	0.313991152	0.215726993	0.01191939	0.43787012	0.536591344	0.254731152	2	TRUE
931	939	YDR054C	chrIV	-	TATA-less	TAF1-enriched	491	562435	562439	-4	YDR054C	1392.3	0.754517359	NA	NA	NA	NA	NA	NA	NA	NA	NA	NA
932	940	orphan	chrIV	+	TATA-less	TAF1-enriched	19	562729	562671	-58	orphan	8.8	0.251534769	NA	NA	NA	NA	NA	NA	NA	NA	NA	NA
933	941	CUT066	chrIV	+	TATA-less	TAF1-enriched	142	563261	563233	-28	CUT066	87.4	0.456368646	NA	NA	NA	NA	NA	NA	NA	NA	NA	NA
934	942	YDR055W	chrIV	+	TATA-containing	TAF1-depleted	46851	563595	563466	-129	YDR055W	5746.4	0.000264713	0.00254568	0.239209597	0.003819936	0.15041543	0.000188157	0.15041543	0.063377373	0.003819936	4	TRUE
935	943	YDR056C	chrIV	-	TATA-containing	TAF1-enriched	2086	565664	565690	-26	YDR056C	1093.6	0.34671147	NA	NA	NA	NA	NA	NA	NA	NA	NA	NA
936	944	YDR057W	chrIV	+	TATA-less	TAF1-enriched	763	565944	565899	-45	YDR057W	185.6	0.030637748	0.404087233	1	0.015970974	0.07538702	0.183480495	0.98674154	0.683555774	0.051861657	1	TRUE
937	945	tR(UCU)D	chrIV	+	TATA-less	-	142	568865	568871	6	tR(UCU)D	1.1	0.626376374	NA	NA	NA	NA	NA	NA	NA	NA	NA	NA
938	946	YDR059C	chrIV	-	TATA-containing	TAF1-enriched	5277	569797	569829	-32	YDR059C	215.8	0.001962478	0.0483633	0.497963524	0.119379115	0.740762749	0.002270767	0.503013203	0.538797883	0.044508648	3	TRUE
939	947	YDR061W	chrIV	+	TATA-less	TAF1-enriched	366	574249	574146	-103	YDR061W	564.2	0.000693692	0.044317889	0.001008389	0.52008323	0.053650053	0.109931697	0.006263226	0.003421127	0.52008323	4	TRUE
940	948	ST4195	chrIV	-	TATA-less	TAF1-enriched	1651	575825	575830	-5	ST4195	81.3	0.144341333	NA	NA	NA	NA	NA	NA	NA	NA	NA	NA
941	949	YDR062W	chrIV	+	TATA-less	TAF1-enriched	785	576184	576107	-77	YDR062W	1392.3	0.000415359	0.215296024	0.115388401	0.227935838	0.209986901	0.026673015	0.062823246	0.529478566	0.152927979	1	TRUE
942	950	CUT499	chrIV	-	TATA-less	TAF1-enriched	218	579077	579079	-2	CUT499	44.3	0.021808381	0.111668278	0.859705706	0.175312352	0.113828051	0.007208056	0.317134954	0.359393161	0.175312352	1	TRUE
943	951	YDR064W	chrIV	+	TATA-less	TAF1-enriched	10518	579493	579429	-64	YDR064W	54185.2	0.000698717	0.596961864	1	0.246665368	1	0.000165422	1	1	0.003526564	2	TRUE
944	952	YDR068W	chrIV	+	TATA-less	TAF1-enriched	51	583706	583673	-33	YDR068W	611.7	0.052448991	NA	NA	NA	NA	NA	NA	NA	NA	NA	NA
945	953	YDR069C	chrIV	-	TATA-less	TAF1-enriched	82	587737	587766	-29	YDR069C	376.2	0.066940281	NA	NA	NA	NA	NA	NA	NA	NA	NA	NA
946	954	CUT067	chrIV	+	TATA-less	TAF1-enriched	61	588035	588013	-22	CUT067	25.2	0.187649234	NA	NA	NA	NA	NA	NA	NA	NA	NA	NA
947	955	YDR071C	chrIV	-	TATA-less	TAF1-depleted	1739	589269	589465	-196	YDR071C	3257.2	0.108824325	NA	NA	NA	NA	NA	NA	NA	NA	NA	NA
948	956	YDR072C	chrIV	-	TATA-containing	TAF1-depleted	27399	591465	591470	-5	YDR072C	354.5	0.051171019	NA	NA	NA	NA	NA	NA	NA	NA	NA	NA
949	957	YDR073W	chrIV	+	TATA-containing	TAF1-depleted	625	592412	592280	-132	YDR073W	1959.4	0.000987356	0.033440755	0.23803603	0.095411274	0.334341664	0.013051298	0.334341664	0.749492553	0.342392528	2	TRUE
950	958	ST4203	chrIV	-	TATA-less	TAF1-enriched	71	593257	593360	-103	ST4203	101.5	0.244730593	NA	NA	NA	NA	NA	NA	NA	NA	NA	NA
951	959	YDR074W	chrIV	+	TATA-less	TAF1-depleted	19017	593870	593799	-71	YDR074W	4386.8	0.076350417	NA	NA	NA	NA	NA	NA	NA	NA	NA	NA
952	960	YDR075W	chrIV	+	TATA-less	TAF1-enriched	105	597025	596982	-43	YDR075W	229.7	0.021406017	0.149050977	0.005619652	0.41094269	0.011916591	0.642817582	0.075046428	0.059299081	0.038681051	3	TRUE
953	961	YDR076W	chrIV	+	TATA-less	TAF1-enriched	15	NA	598419	NA	YDR076W	90.9	0.273327794	NA	NA	NA	NA	NA	NA	NA	NA	NA	NA
954	962	orphan	chrIV	-	TATA-less	TAF1-enriched	231	599288	599518	-230	orphan	422.4	0.172829725	NA	NA	NA	NA	NA	NA	NA	NA	NA	NA
955	963	YDR077W	chrIV	+	TATA-containing	TAF1-depleted	216827	600855	600756	-99	YDR077W	29967.9	0.000396144	0.146551363	0.045906285	0.127477728	0.446022989	0.214803094	0.127477728	0.748354256	0.084902481	1	TRUE
956	964	YDR078C	chrIV	-	TATA-less	TAF1-depleted	119	602864	602886	-22	YDR078C	408.4	0.061885107	NA	NA	NA	NA	NA	NA	NA	NA	NA	NA
957	965	YDR080W	chrIV	+	TATA-less	TAF1-depleted	58	604030	603986	-44	YDR080W	867.6	0.002105765	0.256272078	0.683622905	0.042071929	0.743786156	0.005286968	0.222584395	0.942569431	0.007572672	3	TRUE
958	966	YDR081C	chrIV	-	TATA-less	TAF1-enriched	540	610134	610168	-34	YDR081C	553.2	0.004324687	0.27837306	0.046351095	0.368863186	0.676525262	0.740300536	0.101683865	0.835885206	0.054156616	1	TRUE
959	967	YDR082W	chrIV	+	TATA-less	TAF1-enriched	20	610565	610409	-156	YDR082W	231.6	0.002186726	0.535855563	0.094613254	0.029993122	0.35990549	0.022823596	0.35990549	0.237220081	1	2	TRUE
960	968	YDR083W	chrIV	+	TATA-less	TAF1-depleted	19	NA	612057	NA	YDR083W	1305.3	0.000972297	0.429128079	0.483194986	0.053803789	0.116676302	0.012789761	0.180218187	0.281926924	0.014231266	2	TRUE
961	969	YDR084C	chrIV	-	TATA-less	TAF1-depleted	1297	613999	614038	-39	YDR084C	2332.4	0.034920406	0.567502358	0.814552246	0.381455174	0.073360062	0.37825496	0.023065041	0.050090813	0.381455174	1	TRUE
962	970	YDR086C	chrIV	-	TATA-less	TAF1-depleted	4809	617178	617256	-78	YDR086C	8648.8	0.157741065	NA	NA	NA	NA	NA	NA	NA	NA	NA	NA
963	971	ANT080	chrIV	+	TATA-less	TAF1-enriched	10	617680	617518	-162	ANT080	19.3	0.249535361	NA	NA	NA	NA	NA	NA	NA	NA	NA	NA
964	972	YDR087C	chrIV	-	TATA-less	TAF1-depleted	463	618303	618346	-43	YDR087C	1073.7	0.01506958	0.191095785	0.439805519	0.068348346	0.004180006	0.018617637	0.69610825	0.239375205	0.068348346	2	TRUE
965	973	YDR088C	chrIV	-	TATA-containing	TAF1-enriched	128	619808	619839	-31	YDR088C	200.8	0.081435889	NA	NA	NA	NA	NA	NA	NA	NA	NA	NA
966	974	ST4216	chrIV	-	TATA-less	TAF1-enriched	61	621438	621560	-122	ST4216	50.2	0.228117498	NA	NA	NA	NA	NA	NA	NA	NA	NA	NA
967	975	YDR089W	chrIV	+	TATA-less	TAF1-enriched	488	NA	621991	NA	YDR089W	484.4	0.008308994	0.007924813	0.976722115	0.609058656	0.096491266	0.363969996	0.07346007	0.509101549	0.79817569	1	TRUE
968	976	YDR090C	chrIV	-	TATA-containing	TAF1-depleted	73	NA	626071	NA	YDR090C	436.7	0.007326961	0.002581892	0.266222274	0.866374528	0.324351912	0.012668001	0.682800618	0.860409772	0.28656806	2	TRUE
969	977	YDR091C	chrIV	-	TATA-less	TAF1-enriched	3757	628545	628588	-43	YDR091C	1986.8	0.000922868	0.037058221	0.638435993	0.318619321	0.334480594	0.084780261	0.062053321	0.146046778	0.122538642	1	TRUE
970	978	orphan	chrIV	-	TATA-less	TAF1-enriched	0	628837	628897	-60	orphan	11.1	0.977979439	NA	NA	NA	NA	NA	NA	NA	NA	NA	NA
971	979	CUT503	chrIV	-	TATA-less	TAF1-enriched	200	630512	630566	-54	CUT503	137	0.001198395	0.081372376	0.002773659	0.02700851	0.043333311	0.016259232	0.762440921	0.66623892	0.166324651	4	TRUE
972	980	YDR093W	chrIV	+	TATA-less	TAF1-enriched	138	631048	631016	-32	YDR093W	145.3	0.026698933	0.209223413	0.976148634	0.047540439	0.481337561	0.025030455	0.481337561	0.138910342	0.857048834	2	TRUE
973	981	YDR095C	chrIV	-	TATA-less	TAF1-enriched	18	636433	636573	-140	YDR095C	15.4	0.513607013	NA	NA	NA	NA	NA	NA	NA	NA	NA	NA
974	982	YDR097C	chrIV	-	TATA-less	TAF1-enriched	937	643887	643894	-7	YDR097C	321.1	0.000826145	0.142995852	0.016299039	0.30446905	0.872524535	0.165179335	0.095175394	0.115420365	0.157954928	1	TRUE
975	983	YDR098C	chrIV	-	TATA-less	TAF1-enriched	2959	644955	644979	-24	YDR098C	2192.1	0.001602443	0.038339852	0.715373901	0.078817292	0.263367858	0.03193101	0.354067108	0.265325584	0.169405723	2	TRUE
976	984	orphan	chrIV	+	TATA-containing	TAF1-enriched	10418	652720	652681	-39	orphan	2622.8	0.000452606	0.09452315	0.088879277	0.028884768	0.699794377	0.025082988	0.053856338	0.739987453	0.157403153	2	TRUE
977	985	YDR100W	chrIV	+	TATA-less	TAF1-enriched	617	655026	654987	-39	YDR100W	1632.3	0.0054991	0.099436774	0.105741475	0.831093104	0.127031238	0.51140669	0.68166512	0.112135655	0.3496658	0	FALSE
978	986	YDR101C	chrIV	-	TATA-less	TAF1-enriched	10119	657431	657494	-63	YDR101C	3237.2	0.000169792	0.02780634	0.056562888	0.296333637	0.281721032	0.064888333	0.126928791	0.205780207	0.431128107	1	TRUE
979	987	orphan	chrIV	+	TATA-less	TAF1-enriched	72	657791	657761	-30	orphan	40.3	0.093467614	NA	NA	NA	NA	NA	NA	NA	NA	NA	NA
980	988	YDR103W	chrIV	+	TATA-less	TAF1-enriched	300	658346	658330	-16	YDR103W	324.3	0.092735298	NA	NA	NA	NA	NA	NA	NA	NA	NA	NA
981	989	YDR104C	chrIV	-	TATA-less	TAF1-enriched	74	664905	664959	-54	YDR104C	176.9	0.042860564	0.100485923	0.004386484	0.566496311	0.170887743	0.108850201	0.655714901	0.313813115	0.588250063	1	TRUE
982	990	orphan	chrIV	-	TATA-less	TAF1-enriched	140	675600	675658	-58	orphan	109	0.014175593	0.77130851	0.441146332	0.571957494	0.571957494	0.125719792	0.013300954	0.600207416	0.229370003	1	TRUE
983	991	YDR110W	chrIV	+	TATA-less	TAF1-enriched	353	676077	676055	-22	YDR110W	474.7	0.013640371	0.704753219	0.530880726	0.055398028	0.544082266	0.002134116	0.701609833	0.445717779	0.008840021	2	TRUE
984	992	YDR111C	chrIV	-	TATA-less	TAF1-depleted	1319	679947	679956	-9	YDR111C	614.5	0.012790373	0.965260912	0.009762496	0.360488318	0.583238115	0.263166755	0.248917255	0.237789283	0.242449372	1	TRUE
985	993	YDR113C	chrIV	-	TATA-less	TAF1-enriched	82	681661	681702	-41	YDR113C	122.9	0.076828224	NA	NA	NA	NA	NA	NA	NA	NA	NA	NA
986	994	YDR115W	chrIV	+	TATA-less	TAF1-enriched	1249	682190	682155	-35	YDR115W	2412.9	0.001677144	0.332348781	0.429277428	0.208404793	0.051880245	0.104370584	0.027417541	0.134269155	0.208404793	1	TRUE
987	995	YDR116C	chrIV	-	TATA-less	TAF1-enriched	418	683551	683602	-51	YDR116C	175.5	0.051417232	NA	NA	NA	NA	NA	NA	NA	NA	NA	NA
988	996	YDR117C	chrIV	-	TATA-less	TAF1-enriched	661	685633	685689	-56	YDR117C	930.8	0.000685128	0.2291401	0.020495	0.052883364	0.244125734	0.079679082	0.670303714	0.366950162	0.670303714	1	TRUE
989	997	YDR118W	chrIV	+	TATA-less	TAF1-enriched	123	685895	685855	-40	YDR118W	134.2	0.03205808	0.33909369	0.09077771	0.567368202	0.524532173	0.87603956	0.158630951	0.024028078	0.503753039	1	TRUE
990	998	CUT504	chrIV	-	TATA-less	TAF1-depleted	51	687834	687860	-26	CUT504	23.7	0.281703871	NA	NA	NA	NA	NA	NA	NA	NA	NA	NA
991	999	YDR119W	chrIV	+	TATA-less	TAF1-enriched	553	688203	688142	-61	YDR119W	3798.9	0.000524868	0.122569028	0.448766502	0.190709295	0.307133365	0.122336261	0.021571748	0.248651534	0.097006963	1	TRUE
992	1000	CUT505	chrIV	-	TATA-less	TAF1-enriched	6	690336	690360	-24	CUT505	24.9	0.429985215	NA	NA	NA	NA	NA	NA	NA	NA	NA	NA
993	1001	YDR120C	chrIV	-	TATA-less	TAF1-enriched	152	693212	693233	-21	YDR120C	845.8	0.00293735	0.008361251	0.519166945	0.961599042	0.574309748	0.803646737	0.193611053	0.213811935	0.030264022	2	TRUE
994	1002	YDR121W	chrIV	+	TATA-less	TAF1-depleted	1297	693477	693465	-12	YDR121W	816.4	0.002123725	0.715595294	0.029936486	0.206264641	0.007794376	0.11211612	0.006384124	1	0.103150034	3	TRUE
995	1003	YDR123C	chrIV	-	TATA-less	TAF1-enriched	669	699333	699420	-87	YDR123C	271.8	0.002591186	0.021070424	0.320824175	0.176566093	0.085570386	0.358209212	0.683405752	0.451084441	0.942627172	1	TRUE
996	1004	orphan	chrIV	+	TATA-less	TAF1-enriched	106	700018	699969	-49	orphan	178.7	0.086859554	NA	NA	NA	NA	NA	NA	NA	NA	NA	NA
997	1005	YDR126W	chrIV	+	TATA-containing	TAF1-enriched	335	703264	703228	-36	YDR126W	106.5	0.056739917	NA	NA	NA	NA	NA	NA	NA	NA	NA	NA
998	1006	CUT507	chrIV	-	TATA-containing	TAF1-enriched	243	703919	704041	-122	CUT507	119.9	0.066919721	NA	NA	NA	NA	NA	NA	NA	NA	NA	NA
999	1007	YDR127W	chrIV	+	TATA-less	TAF1-enriched	808	704445	704403	-42	YDR127W	737.5	0.036169783	0.684059967	0.56101977	0.312045346	0.063636802	0.04966775	0.089978175	0.658568705	0.183733925	1	TRUE
1000	1008	YDR128W	chrIV	+	TATA-less	TAF1-enriched	171	709694	709505	-189	YDR128W	106.9	0.010503276	0.97684541	0.055417649	0.032503471	0.403943438	0.002153497	0.892512588	0.319556116	0.305191148	2	TRUE
1001	1009	YDR129C	chrIV	-	TATA-less	TAF1-enriched	4105	715374	715422	-48	YDR129C	2959.4	0.000623174	0.029709867	0.214144443	0.018822477	0.465996295	0.001374765	0.465996295	0.850696939	0.083020892	3	TRUE
1002	1010	YDR130C	chrIV	-	TATA-less	TAF1-depleted	109	716625	716650	-25	YDR130C	271.9	0.223258258	NA	NA	NA	NA	NA	NA	NA	NA	NA	NA
1003	1011	orphan	chrIV	+	TATA-less	TAF1-enriched	1	717067	716902	-165	orphan	3.9	0.163409624	NA	NA	NA	NA	NA	NA	NA	NA	NA	NA
1004	1012	YDR131C	chrIV	-	TATA-less	TAF1-enriched	272	NA	718515	NA	YDR131C	51	0.022822656	0.07631889	0.265588983	0.162700407	0.961605031	0.010832282	0.490194102	0.575935869	0.064986758	1	TRUE
1005	1013	YDR132C	chrIV	-	TATA-less	TAF1-enriched	101	720395	720422	-27	YDR132C	234.5	0.1528917	NA	NA	NA	NA	NA	NA	NA	NA	NA	NA
1006	1014	YDR134C	chrIV	-	TATA-containing	TAF1-depleted	24391	721455	721533	-78	YDR134C	16705.3	0.07918344	NA	NA	NA	NA	NA	NA	NA	NA	NA	NA
1007	1015	YDR135C	chrIV	-	TATA-containing	TAF1-enriched	250	727579	727606	-27	YDR135C	3310.6	0.001342261	0.556467479	0.015900305	0.168501025	0.024656428	0.075445545	0.503887204	0.154366531	0.089290914	2	TRUE
1008	1016	CUT069	chrIV	+	TATA-containing	TAF1-enriched	17	727854	727852	-2	CUT069	5.9	0.292346088	NA	NA	NA	NA	NA	NA	NA	NA	NA	NA
1009	1017	YDR137W	chrIV	+	TATA-less	TAF1-enriched	133	728214	728159	-55	YDR137W	353.6	0.033519611	0.069656516	0.092478417	0.897981083	0.542519318	0.562370492	0.05445716	0.031415055	0.441731311	1	TRUE
1010	1018	YDR138W	chrIV	+	TATA-less	TAF1-enriched	485	730609	730574	-35	YDR138W	141.9	0.0013813	0.513957664	0.01788985	0.867940356	0.143406629	0.302836382	0.10320779	0.035407073	0.867940356	2	TRUE
1011	1019	YDR140W	chrIV	+	TATA-containing	TAF1-enriched	135	734175	734133	-42	YDR140W	410.6	0.001749145	0.860595314	0.049873208	0.093876777	0.682683848	0.055564631	0.446360405	0.144534912	0.093876777	1	TRUE
1012	1020	YDR141C	chrIV	-	TATA-less	TAF1-enriched	4320	739995	740039	-44	YDR141C	641.5	0.001728232	0.217731378	0.008260091	0.02765429	0.884973651	0.011351205	0.489447623	0.91736134	0.126750447	3	TRUE
1013	1021	YDR142C	chrIV	-	TATA-less	TAF1-depleted	62	741732	741750	-18	YDR142C	492.2	0.038534413	0.149772624	0.244461651	0.737861549	0.271469665	0.72650545	0.029004063	0.257788295	0.513475466	1	TRUE
1014	1022	YDR143C	chrIV	-	TATA-less	TAF1-depleted	234	743950	744006	-56	YDR143C	128.1	0.001119539	0.663058371	0.042028164	0.152190088	0.97461669	0.012219607	0.239080051	0.579203448	0.041710976	3	TRUE
1015	1023	YDR144C	chrIV	-	TATA-less	TAF1-depleted	281	746196	746263	-67	YDR144C	1393.8	0.140869816	NA	NA	NA	NA	NA	NA	NA	NA	NA	NA
1016	1024	YDR145W	chrIV	+	TATA-less	TAF1-enriched	468	746717	746672	-45	YDR145W	1124.3	0.001043646	0.333873131	0.278597978	0.093723249	0.408799047	0.018765261	0.063953285	0.346123385	0.093723249	1	TRUE
1017	1025	YDR146C	chrIV	-	TATA-less	TAF1-enriched	144	750887	750907	-20	YDR146C	709.7	0.825746937	NA	NA	NA	NA	NA	NA	NA	NA	NA	NA
1018	1026	CUT508	chrIV	-	TATA-less	TAF1-enriched	0	751250	751323	-73	CUT508	44.4	0.028164783	0.343197775	0.748349744	0.034977508	0.847982996	0.004427886	0.773699711	0.836612496	0.0594329	2	TRUE
1019	1027	YDR147W	chrIV	+	TATA-less	TAF1-enriched	388	751598	751562	-36	YDR147W	287.7	0.001474871	0.190229757	0.344128849	0.140271096	0.204971007	0.019481834	0.092559351	0.404497922	0.582282392	1	TRUE
1020	1028	YDR148C	chrIV	-	TATA-less	TAF1-enriched	2164	755070	755130	-60	YDR148C	1249.9	0.516015394	NA	NA	NA	NA	NA	NA	NA	NA	NA	NA
1021	1029	orphan	chrIV	-	TATA-less	TAF1-enriched	645	755070	755309	-239	orphan	538.5	0.05216026	NA	NA	NA	NA	NA	NA	NA	NA	NA	NA
1022	1030	YDR151C	chrIV	-	TATA-less	TAF1-enriched	469	765274	765319	-45	YDR151C	1039.1	0.01169209	0.059753865	0.14445944	0.695298069	0.349672391	0.812388163	0.57035438	0.176425914	0.683521728	0	FALSE
1023	1031	YDR152W	chrIV	+	TATA-less	TAF1-enriched	1056	765703	765677	-26	YDR152W	1101.3	0.045480086	0.208180545	0.002571926	0.33610453	0.724318426	0.153273199	0.460849038	0.238117274	0.050483493	1	TRUE
1024	1032	YDR153C	chrIV	-	TATA-less	TAF1-depleted	2169	767905	768104	-199	YDR153C	226.2	0.48102804	NA	NA	NA	NA	NA	NA	NA	NA	NA	NA
1025	1033	YDR155C	chrIV	-	TATA-containing	TAF1-depleted	93200	768917	769037	-120	YDR155C	12319.1	0.080773062	NA	NA	NA	NA	NA	NA	NA	NA	NA	NA
1026	1034	YDR156W	chrIV	+	TATA-less	TAF1-enriched	3917	769540	769485	-55	YDR156W	2268.5	0.005854338	0.617241091	0.085472993	0.314238486	0.132188686	0.747297012	0.132188686	0.02683816	0.314238486	1	TRUE
1027	1035	YDR157W	chrIV	+	TATA-less	TAF1-enriched	418	769953	769919	-34	YDR157W	42.1	0.204730127	NA	NA	NA	NA	NA	NA	NA	NA	NA	NA
1028	1036	YDR158W	chrIV	+	TATA-less	TAF1-depleted	845	770344	770322	-22	YDR158W	2730.7	0.007498636	0.001376903	0.100142842	0.916003541	0.385343803	0.578816519	0.056577865	0.713928688	0.083975389	1	TRUE
1029	1037	YDR159W	chrIV	+	TATA-less	TAF1-enriched	153	772026	771935	-91	YDR159W	334	0.009773201	0.049221459	0.237999814	0.198915609	0.829426062	0.049125081	0.167464362	0.893470645	0.47761325	2	TRUE
1030	1038	YDR160W	chrIV	+	TATA-less	TAF1-enriched	433	NA	776034	NA	YDR160W	181.2	0.202567728	NA	NA	NA	NA	NA	NA	NA	NA	NA	NA
1031	1039	YDR161W	chrIV	+	TATA-less	TAF1-enriched	149	779042	779014	-28	YDR161W	2353.3	0.009730046	0.025942081	0.446122672	0.360262232	0.618795302	0.340510341	0.014061375	0.010813769	0.254465767	3	TRUE
1032	1040	YDR162C	chrIV	-	TATA-less	TAF1-depleted	675	781188	781230	-42	YDR162C	145.4	0.262934951	NA	NA	NA	NA	NA	NA	NA	NA	NA	NA
1033	1041	YDR163W	chrIV	+	TATA-less	TAF1-enriched	3119	781428	781359	-69	YDR163W	269.4	0.072776174	NA	NA	NA	NA	NA	NA	NA	NA	NA	NA
1034	1042	YDR164C	chrIV	-	TATA-less	TAF1-enriched	454	784216	784267	-51	YDR164C	818.4	0.003746815	1	0.052199858	0.056226687	0.354216728	0.013706572	0.354216728	0.485916852	0.716963122	1	TRUE
1035	1043	CUT513	chrIV	-	TATA-less	TAF1-enriched	69	784599	784663	-64	CUT513	15.5	0.071966825	NA	NA	NA	NA	NA	NA	NA	NA	NA	NA
1036	1044	YDR165W	chrIV	+	TATA-less	TAF1-depleted	357	784884	784840	-44	YDR165W	867.8	0.00064468	0.137419705	0.096868244	0.135792149	0.188121137	0.65790363	0.188121137	0.074825036	0.193530986	0	FALSE
1037	1045	YDR167W	chrIV	+	TATA-less	TAF1-enriched	930	789646	789542	-104	YDR167W	2405.2	0.000392236	0.032578442	0.160178262	0.44671703	0.563976029	0.024064927	0.178235766	0.803919345	0.09612336	2	TRUE
1038	1046	YDR168W	chrIV	+	TATA-less	TAF1-enriched	261	790327	790288	-39	YDR168W	2633.4	0.042182302	0.849528608	0.047170927	0.428743177	0.419475851	0.088623932	0.233648501	0.556394034	0.080023586	1	TRUE
1039	1047	YDR169C	chrIV	-	TATA-less	TAF1-enriched	190	794212	794255	-43	YDR169C	386	0.001207113	0.348878553	0.069526126	0.54765662	0.993603425	0.030531121	0.60229343	0.104176287	0.079135554	1	TRUE
1040	1048	CUT071	chrIV	+	TATA-less	TAF1-enriched	150	794507	794482	-25	CUT071	29	0.034254483	0.815986767	0.056739604	0.038337166	0.444413037	0.058446666	0.293006834	0.376448026	0.655516776	1	TRUE
1041	1049	YDR170C	chrIV	-	TATA-less	TAF1-depleted	651	802191	802418	-227	YDR170C	460.5	0.010826093	0.258097542	0.727863488	0.224360698	0.076576839	0.394809835	0.022658496	0.429869887	0.103533341	1	TRUE
1042	1050	tQ(UUG)D3	chrIV	+	TATA-less	-	12	802653	802597	-56	tQ(UUG)D3	20.4	0.191055309	NA	NA	NA	NA	NA	NA	NA	NA	NA	NA
1043	1051	orphan	chrIV	-	TATA-less	TAF1-enriched	3805	806007	806206	-199	orphan	108.1	0.146410485	NA	NA	NA	NA	NA	NA	NA	NA	NA	NA
1044	1052	YDR171W	chrIV	+	TATA-containing	TAF1-depleted	12479	806674	806560	-114	YDR171W	1466.5	0.002871094	0.349536172	0.13756933	0.261703002	0.444559598	0.01764583	0.076224187	0.185841457	0.147700642	1	TRUE
1045	1053	YDR172W	chrIV	+	TATA-less	TAF1-enriched	92105	808318	808271	-47	YDR172W	5640.6	0.000888402	0.180399941	0.512337536	0.089385736	0.66093854	0.013093427	0.241074385	0.212853712	0.131746574	1	TRUE
1046	1054	YDR173C	chrIV	-	TATA-less	TAF1-enriched	75	811644	811675	-31	YDR173C	1438.9	0.000311135	0.129750173	0.145483152	0.397486204	0.580104667	0.025968434	0.204377255	0.025968434	0.241377861	2	TRUE
1047	1055	YDR174W	chrIV	+	TATA-less	TAF1-enriched	20288	812135	812085	-50	YDR174W	1358.4	0.044808049	0.09753756	0.58074042	0.974597205	0.389919868	0.168463164	0.463930291	0.334010854	0.214281045	0	FALSE
1048	1056	orphan	chrIV	-	TATA-less	TAF1-enriched	1	812289	812323	-34	orphan	4.5	0.877507525	NA	NA	NA	NA	NA	NA	NA	NA	NA	NA
1049	1057	YDR175C	chrIV	-	TATA-less	TAF1-enriched	287	814159	814199	-40	YDR175C	458.5	0.020660341	0.884156937	0.075476174	0.105227428	0.804604393	0.003107855	0.40206288	0.909769513	0.204482199	1	TRUE
1050	1058	YDR176W	chrIV	+	TATA-less	TAF1-enriched	40	NA	814458	NA	YDR176W	267.5	0.083966861	NA	NA	NA	NA	NA	NA	NA	NA	NA	NA
1051	1059	YDR177W	chrIV	+	TATA-less	TAF1-enriched	366	816984	816789	-195	YDR177W	1924.4	0.020253823	0.522778911	0.081349018	0.811370763	0.45458372	0.150482607	0.316167953	0.088221607	0.050347956	0	FALSE
1052	1060	YDR178W	chrIV	+	TATA-containing	TAF1-enriched	2773	817864	817848	-16	YDR178W	1392.5	0.057249656	NA	NA	NA	NA	NA	NA	NA	NA	NA	NA
1053	1061	YDR180W	chrIV	+	TATA-less	TAF1-enriched	30	821187	821158	-29	YDR180W	125.2	0.174318137	NA	NA	NA	NA	NA	NA	NA	NA	NA	NA
1054	1062	YDR184C	chrIV	-	TATA-less	TAF1-enriched	216	831510	831542	-32	YDR184C	1115.4	0.001480538	0.05144199	0.249749735	0.046789405	0.409725806	0.076100331	0.409725806	0.950081977	0.238004378	1	TRUE
1055	1063	ST0592	chrIV	+	TATA-less	TAF1-enriched	50	832026	831853	-173	ST0592	65.3	0.092607564	NA	NA	NA	NA	NA	NA	NA	NA	NA	NA
1056	1064	YDR185C	chrIV	-	TATA-less	TAF1-enriched	1064	832369	832505	-136	YDR185C	590.5	0.01210327	0.465336442	0.335188301	0.872917113	0.051004507	0.649612839	0.051004507	0.868786535	1	0	FALSE
1057	1065	YDR186C	chrIV	-	TATA-less	TAF1-enriched	3014	835480	835546	-66	YDR186C	469.8	0.399881253	NA	NA	NA	NA	NA	NA	NA	NA	NA	NA
1058	1066	orphan	chrIV	-	TATA-less	TAF1-depleted	788	835680	835684	-4	orphan	348.8	0.301465157	NA	NA	NA	NA	NA	NA	NA	NA	NA	NA
1059	1067	orphan	chrIV	-	TATA-less	TAF1-enriched	6	836224	836290	-66	orphan	0.6	0.048616968	0.048916826	0.432767581	0.80012538	0.062811848	0.049860204	0.52675839	0.011346303	0.432767581	3	TRUE
1060	1068	YDR188W	chrIV	+	TATA-less	TAF1-enriched	885	836412	836373	-39	YDR188W	1291.4	0.095577139	NA	NA	NA	NA	NA	NA	NA	NA	NA	NA
1061	1069	YDR189W	chrIV	+	TATA-less	TAF1-enriched	5642	838398	838363	-35	YDR189W	1593.6	0.00296983	0.030971927	0.028743467	0.057169735	0.852323797	0.699046176	0.057169735	0.537575403	0.941931077	2	TRUE
1062	1070	YDR190C	chrIV	-	TATA-less	TAF1-enriched	265	841988	842041	-53	YDR190C	4196.2	0.014184866	0.964744065	0.101956304	0.268904668	0.523780237	0.975066231	0.082732365	0.125647908	0.283132701	0	FALSE
1063	1071	YDR191W	chrIV	+	TATA-less	TAF1-enriched	524	842340	842312	-28	YDR191W	138.5	0.10719915	NA	NA	NA	NA	NA	NA	NA	NA	NA	NA
1064	1072	YDR192C	chrIV	-	TATA-less	TAF1-enriched	415	844882	844934	-52	YDR192C	313.8	0.001565934	0.126638965	0.347220403	0.032365197	0.310762639	0.129445239	0.253313915	0.100814023	0.181742786	1	TRUE
1065	1073	YDR194C	chrIV	-	TATA-containing	TAF1-enriched	197	847928	847969	-41	YDR194C	1158.7	0.005209182	0.090465617	0.515711212	0.573446887	0.466267535	0.00477666	0.466267535	0.346923253	0.164256472	1	TRUE
1066	1074	YDR195W	chrIV	+	TATA-containing	TAF1-enriched	446	848376	848360	-16	YDR195W	466	0.00158549	0.770708514	0.056263889	0.043450365	0.731440118	0.032926356	0.44829791	0.348405329	0.029332597	3	TRUE
1067	1075	YDR196C	chrIV	-	TATA-less	TAF1-depleted	682	850980	850999	-19	YDR196C	714	0.02186813	0.116876619	0.029420584	0.42187415	0.055303444	0.734770275	0.01400109	0.877614433	0.106462307	2	TRUE
1068	1076	YDR197W	chrIV	+	TATA-less	TAF1-enriched	405	851249	851227	-22	YDR197W	624.6	0.001784782	0.559442565	0.231200884	0.033067699	0.577249687	0.005933293	0.178840581	0.799511345	0.033067699	3	TRUE
1069	1077	YDR198C	chrIV	-	TATA-less	TAF1-enriched	69	NA	853988	NA	YDR198C	223	0.115904171	NA	NA	NA	NA	NA	NA	NA	NA	NA	NA
1070	1078	YDR200C	chrIV	-	TATA-less	TAF1-enriched	4529	856111	856158	-47	YDR200C	744	0.054210904	NA	NA	NA	NA	NA	NA	NA	NA	NA	NA
1071	1079	YDR205W	chrIV	+	TATA-less	TAF1-enriched	3011	859363	859345	-18	YDR205W	1109.8	0.001774446	0.020199773	0.480433839	0.573019257	0.181365657	0.064280607	0.663718332	0.252872676	0.809130926	1	TRUE
1072	1080	YDR206W	chrIV	+	TATA-less	TAF1-enriched	110	NA	861763	NA	YDR206W	495.6	0.006693281	0.085251857	0.251245451	0.693008519	0.031466408	0.610294529	0.046591907	0.778841369	0.70493866	2	TRUE
1073	1081	YDR207C	chrIV	-	TATA-less	TAF1-enriched	560	867535	867591	-56	YDR207C	431.4	0.019898323	0.413088389	0.561664977	0.011247811	0.365602776	0.001065831	0.365602776	0.924549991	0.011247811	3	TRUE
1074	1082	YDR208W	chrIV	+	TATA-less	TAF1-enriched	3215	868295	868132	-163	YDR208W	2194.5	0.034991237	0.004439138	0.425659984	0.492918859	0.755291414	0.773803821	0.492918859	0.186150349	0.492918859	1	TRUE
1075	1083	YDR210W	chrIV	+	TATA-containing	TAF1-enriched	4165	871059	871042	-17	YDR210W	3741.6	0.012015817	0.431049584	0.243406746	0.054258833	0.366800393	0.39211852	0.419871603	0.403627353	0.005862612	1	TRUE
1076	1084	YDR211W	chrIV	+	TATA-containing	TAF1-depleted	211	884751	884685	-66	YDR211W	1850.5	0.01917153	0.029255992	0.000679241	0.973723072	0.644691843	0.166959241	0.644691843	0.551615851	0.531416732	2	TRUE
1077	1085	YDR212W	chrIV	+	TATA-less	TAF1-enriched	4308	887220	887164	-56	YDR212W	2211.2	0.017326763	0.236365431	0.074506592	0.030014036	0.226639215	0.641812299	0.085158062	0.139355472	0.602745132	1	TRUE
1078	1086	CUT515	chrIV	-	TATA-less	TAF1-enriched	1745	892390	892429	-39	CUT515	84.6	0.040437477	0.044500587	0.424970277	0.993543287	0.533210187	0.053268871	0.667998878	0.198789667	0.253859383	1	TRUE
1079	1087	YDR214W	chrIV	+	TATA-less	TAF1-depleted	225	892948	892759	-189	YDR214W	2597.3	0.04936491	0.349497531	0.006286675	0.341271894	0.775886886	0.621636203	0.231825632	0.468729318	0.341271894	1	TRUE
1080	1088	YDR219C	chrIV	-	TATA-less	TAF1-enriched	269	NA	907062	NA	YDR219C	225.2	0.000781786	0.017066343	0.238759409	0.010796788	0.21396406	0.005152187	0.21396406	0.983589602	0.202449437	3	TRUE
1081	1089	YDR221W	chrIV	+	TATA-less	TAF1-enriched	299	907502	907335	-167	YDR221W	798.4	0.097086213	NA	NA	NA	NA	NA	NA	NA	NA	NA	NA
1082	1090	ST4285	chrIV	-	TATA-less	TAF1-enriched	216	909223	909375	-152	ST4285	123.3	0.215446677	NA	NA	NA	NA	NA	NA	NA	NA	NA	NA
1083	1091	YDR222W	chrIV	+	TATA-containing	TAF1-enriched	2775	910042	910014	-28	YDR222W	1018.6	0.015321665	0.907214836	0.080414765	0.326339203	0.477579266	0.081680899	0.581904094	0.991780446	0.108727732	0	FALSE
1084	1092	YDR224C	chrIV	-	TATA-containing	TAF1-depleted	88252	914665	914746	-81	YDR224C	6500.4	0.056597223	NA	NA	NA	NA	NA	NA	NA	NA	NA	NA
1085	1093	CUT073	chrIV	+	TATA-less	TAF1-enriched	536	915270	915230	-40	CUT073	15.3	0.276134372	NA	NA	NA	NA	NA	NA	NA	NA	NA	NA
1086	1094	YDR225W	chrIV	+	TATA-containing	TAF1-depleted	1598	915439	915432	-7	YDR225W	21883.4	0.003048307	0.004184842	1	0.566047202	0.566047202	0.093088429	0.566047202	0.458766604	0.156899316	1	TRUE
1087	1095	orphan	chrIV	+	TATA-less	TAF1-depleted	98	916125	915931	-194	orphan	153.7	0.356949768	NA	NA	NA	NA	NA	NA	NA	NA	NA	NA
1088	1096	YDR226W	chrIV	+	TATA-containing	TAF1-depleted	5157	916480	916451	-29	YDR226W	6548.3	0.000325689	0.097447951	0.103690346	0.098842533	1	0.000343987	0.234694134	0.443034581	0.146381479	1	TRUE
1089	1097	YDR227W	chrIV	+	TATA-less	TAF1-enriched	121	917481	917463	-18	YDR227W	61.3	0.338084153	NA	NA	NA	NA	NA	NA	NA	NA	NA	NA
1090	1098	YDR228C	chrIV	-	TATA-less	TAF1-depleted	93	923725	923850	-125	YDR228C	169.7	0.083513616	NA	NA	NA	NA	NA	NA	NA	NA	NA	NA
1091	1099	orphan	chrIV	+	TATA-less	TAF1-enriched	7	924320	924170	-150	orphan	20.7	0.133865029	NA	NA	NA	NA	NA	NA	NA	NA	NA	NA
1092	1100	ST4290	chrIV	-	TATA-containing	TAF1-enriched	128	924461	924524	-63	ST4290	161	0.010866937	0.483612401	0.021949946	0.847866744	0.501938014	0.142824011	0.141350327	0.432878965	0.74916921	1	TRUE
1093	1101	orphan	chrIV	+	TATA-containing	TAF1-enriched	253	926708	926524	-184	orphan	62.9	0.470526833	NA	NA	NA	NA	NA	NA	NA	NA	NA	NA
1094	1102	YDR231C	chrIV	-	TATA-less	TAF1-enriched	1445	926894	926935	-41	YDR231C	458.7	0.004758323	0.432575481	0.067073452	0.034225827	0.245161335	0.006265504	0.220249952	0.821136611	0.011363119	3	TRUE
1095	1103	YDR232W	chrIV	+	TATA-less	TAF1-enriched	37705	927243	927201	-42	YDR232W	1456.5	0.136018309	NA	NA	NA	NA	NA	NA	NA	NA	NA	NA
1096	1104	YDR233C	chrIV	-	TATA-containing	TAF1-enriched	13286	930304	930369	-65	YDR233C	5198.5	0.008684093	0.015355703	0.269991185	0.046873075	0.348206295	0.018249415	0.622092838	0.014580946	0.017834577	5	TRUE
1097	1105	orphan	chrIV	+	TATA-less	TAF1-enriched	288	930670	930510	-160	orphan	87.2	0.017376646	0.001356714	0.004516339	0.690036972	0.100367177	0.836836248	0.257379792	0.606654417	0.911088738	2	TRUE
1098	1106	YDR234W	chrIV	+	TATA-containing	TAF1-depleted	780	931178	931021	-157	YDR234W	619.9	0.008380307	0.295158623	0.89588685	0.483417475	0.009872043	0.869337497	0.00819351	0.174741332	0.01688752	3	TRUE
1099	1107	YDR235W	chrIV	+	TATA-less	TAF1-depleted	324	933523	933493	-30	YDR235W	624.6	0.323821166	NA	NA	NA	NA	NA	NA	NA	NA	NA	NA
1100	1108	YDR236C	chrIV	-	TATA-less	TAF1-enriched	355	935919	935917	2	YDR236C	672.3	0.001186098	0.231389355	0.054037466	0.725036436	0.090127247	0.231250622	0.169141651	0.030216363	0.725036436	1	TRUE
1101	1109	YDR237W	chrIV	+	TATA-less	TAF1-enriched	118	NA	936473	NA	YDR237W	510	0.080046567	NA	NA	NA	NA	NA	NA	NA	NA	NA	NA
1102	1110	YDR238C	chrIV	-	TATA-less	TAF1-enriched	1940	940803	940870	-67	YDR238C	2664.2	0.001415351	0.040073194	0.20478885	0.169902866	0.778620101	0.076409412	0.417778967	0.53584965	0.169902866	1	TRUE
1103	1111	YDR239C	chrIV	-	TATA-less	TAF1-enriched	143	943409	943432	-23	YDR239C	406.1	0.001844774	0.393431369	0.020082147	0.042263754	0.84662978	0.067075615	0.871948779	0.851442321	0.10699758	2	TRUE
1104	1112	YDR244W	chrIV	+	TATA-containing	TAF1-enriched	3375	950571	950538	-33	YDR244W	389.7	0.004093388	0.004553624	0.036168074	0.094242136	0.811057646	0.015187806	0.057886416	0.18790212	0.285606467	3	TRUE
1105	1113	YDR245W	chrIV	+	TATA-less	TAF1-enriched	624	952907	952779	-128	YDR245W	948.3	0.073776963	NA	NA	NA	NA	NA	NA	NA	NA	NA	NA
1106	1114	YDR246W	chrIV	+	TATA-less	TAF1-enriched	284	954313	954294	-19	YDR246W	1106.4	0.000780296	0.070608238	0.019862522	0.006546701	0.614591478	0.003209612	0.866706451	0.573175572	0.114628044	3	TRUE
1107	1115	ANT129	chrIV	-	TATA-less	TAF1-enriched	10	954639	954687	-48	ANT129	78.2	0.545309132	NA	NA	NA	NA	NA	NA	NA	NA	NA	NA
1108	1116	YDR247W	chrIV	+	TATA-less	TAF1-depleted	916	955677	955667	-10	YDR247W	196.3	0.133429594	NA	NA	NA	NA	NA	NA	NA	NA	NA	NA
1109	1117	YDR248C	chrIV	-	TATA-containing	TAF1-enriched	425	958385	958404	-19	YDR248C	1418	0.060625418	NA	NA	NA	NA	NA	NA	NA	NA	NA	NA
1110	1118	YDR249C	chrIV	-	TATA-less	TAF1-enriched	118	959795	959888	-93	YDR249C	171.4	0.142109068	NA	NA	NA	NA	NA	NA	NA	NA	NA	NA
1111	1119	orphan	chrIV	-	TATA-less	TAF1-enriched	69	959937	959971	-34	orphan	139.2	0.119510149	NA	NA	NA	NA	NA	NA	NA	NA	NA	NA
1112	1120	YDR251W	chrIV	+	TATA-less	TAF1-enriched	3901	960346	960324	-22	YDR251W	458.3	0.062207003	NA	NA	NA	NA	NA	NA	NA	NA	NA	NA
1113	1121	YDR252W	chrIV	+	TATA-less	TAF1-enriched	138	963441	963404	-37	YDR252W	343.2	0.008771092	0.070633179	0.122765684	0.646329069	0.916650308	0.072181231	0.778126809	0.859760174	0.69323751	0	FALSE
1114	1122	YDR253C	chrIV	-	TATA-less	TAF1-enriched	6	964930	964973	-43	YDR253C	5.6	0.139941689	NA	NA	NA	NA	NA	NA	NA	NA	NA	NA
1115	1123	YDR254W	chrIV	+	TATA-less	TAF1-enriched	52	965094	965041	-53	YDR254W	52.8	0.002471568	0.704252112	0.048731677	0.174019761	0.396646234	0.008737849	0.283932387	0.967061829	0.065887435	2	TRUE
1116	1124	YDR255C	chrIV	-	TATA-less	TAF1-enriched	530	967809	967867	-58	YDR255C	440.5	0.210865547	NA	NA	NA	NA	NA	NA	NA	NA	NA	NA
1117	1125	YDR257C	chrIV	-	TATA-less	TAF1-enriched	78	971421	971470	-49	YDR257C	698.9	0.013456304	0.81416687	0.008184633	0.176434311	0.02862201	0.371659464	0.02862201	0.662621541	0.439838441	3	TRUE
1118	1126	YDR258C	chrIV	-	TATA-containing	TAF1-depleted	1251	974124	974272	-148	YDR258C	1166.5	0.660664561	NA	NA	NA	NA	NA	NA	NA	NA	NA	NA
1119	1127	CUT075	chrIV	+	TATA-less	TAF1-enriched	16	NA	974614	NA	CUT075	6.5	0.17629989	NA	NA	NA	NA	NA	NA	NA	NA	NA	NA
1120	1128	orphan	chrIV	+	TATA-less	TAF1-enriched	83	976518	976498	-20	orphan	21.7	0.80817402	NA	NA	NA	NA	NA	NA	NA	NA	NA	NA
1121	1129	ST0633	chrIV	+	TATA-less	TAF1-enriched	287	977052	976924	-128	ST0633	68.4	0.014733499	0.368145622	0.222734049	0.479203182	0.145691023	0.517873831	0.955618456	0.750347495	0.854908674	0	FALSE
1122	1130	YDR260C	chrIV	-	TATA-less	TAF1-enriched	139	977212	977255	-43	YDR260C	760.7	0.109155709	NA	NA	NA	NA	NA	NA	NA	NA	NA	NA
1123	1131	YDR261C	chrIV	-	TATA-containing	TAF1-enriched	1523	NA	979222	NA	YDR261C	3011	0.010006364	0.336496099	0.068715315	0.467946117	0.072713943	0.796848814	0.043596182	0.022866447	0.467946117	2	TRUE
1124	1132	orphan	chrIV	+	TATA-less	TAF1-enriched	29	NA	979577	NA	orphan	55	0.443200366	NA	NA	NA	NA	NA	NA	NA	NA	NA	NA
1125	1133	ST4309	chrIV	-	TATA-containing	TAF1-enriched	114	980817	980848	-31	ST4309	122	0.037117284	0.022765826	0.727743552	0.880012508	0.113869392	0.454008338	0.031313052	0.441737224	0.817779022	2	TRUE
1126	1134	tG(GCC)D2	chrIV	+	TATA-less	-	453	992844	992821	-23	tG(GCC)D2	10.8	0.097551642	NA	NA	NA	NA	NA	NA	NA	NA	NA	NA
1127	1135	YDR262W	chrIV	+	TATA-containing	TAF1-depleted	1112	993176	993124	-52	YDR262W	1722.8	0.006881262	0.929843578	0.073424965	0.130796514	0.562812718	0.350395384	0.033855768	0.092786076	0.747844675	1	TRUE
1128	1136	YDR264C	chrIV	-	TATA-less	TAF1-enriched	904	998363	998393	-30	YDR264C	2428.8	0.176754666	NA	NA	NA	NA	NA	NA	NA	NA	NA	NA
1129	1137	YDR265W	chrIV	+	TATA-less	TAF1-enriched	381	998691	998675	-16	YDR265W	167.4	0.017497088	0.048277721	0.446831346	0.841233529	0.027561295	0.780018251	0.079299124	0.541655254	0.175693161	2	TRUE
1130	1138	YDR266C	chrIV	-	TATA-less	TAF1-depleted	203	1002172	1002239	-67	YDR266C	1282	0.030481721	0.861468211	0.827326365	0.35551455	0.142765699	0.258008016	0.003377224	0.168234197	0.22601517	1	TRUE
1131	1139	YDR267C	chrIV	-	TATA-less	TAF1-enriched	384	1003652	1003696	-44	YDR267C	136.2	0.197239868	NA	NA	NA	NA	NA	NA	NA	NA	NA	NA
1132	1140	YDR268W	chrIV	+	TATA-less	TAF1-enriched	37	NA	1003728	NA	YDR268W	14.9	0.161851651	NA	NA	NA	NA	NA	NA	NA	NA	NA	NA
1133	1141	orphan	chrIV	+	TATA-less	TAF1-enriched	23	1005115	1005046	-69	orphan	13.9	0.67759589	NA	NA	NA	NA	NA	NA	NA	NA	NA	NA
1134	1142	CUT516	chrIV	-	TATA-less	TAF1-enriched	128	1005196	1005297	-101	CUT516	129.2	0.541464046	NA	NA	NA	NA	NA	NA	NA	NA	NA	NA
1135	1143	YDR270W	chrIV	+	TATA-less	TAF1-depleted	63	1005591	1005588	-3	YDR270W	146.1	0.000567677	0.601090165	0.063032333	0.036431814	0.817559475	0.013326233	0.168773419	0.254325684	0.154480142	2	TRUE
1136	1144	YDR272W	chrIV	+	TATA-less	TAF1-enriched	941	1008985	1008953	-32	YDR272W	924.5	0.001379725	0.489172099	0.018382772	0.389263986	1	0.008161001	1	0.609152705	0.09151346	2	TRUE
1137	1145	CUT517	chrIV	-	TATA-less	TAF1-depleted	176	1011437	1011496	-59	CUT517	76.8	0.040717356	0.217521883	0.673959654	0.611066072	0.227119697	0.064817656	0.252523011	0.31474081	0.020326283	1	TRUE
1138	1146	orphan	chrIV	-	TATA-containing	TAF1-enriched	172	1013127	1013159	-32	orphan	41.8	0.105570532	NA	NA	NA	NA	NA	NA	NA	NA	NA	NA
1139	1147	orphan	chrIV	+	TATA-less	TAF1-enriched	5	1013838	1013712	-126	orphan	58.7	0.205646673	NA	NA	NA	NA	NA	NA	NA	NA	NA	NA
1140	1148	YDR276C	chrIV	-	TATA-containing	TAF1-depleted	27574	1013617	1013662	-45	YDR276C	27814.7	0.030677144	0.918707405	0.080181225	0.761534474	0.689673749	0.804570948	0.713354961	0.216020581	0.053285294	0	FALSE
1141	1149	ST0641	chrIV	+	TATA-less	TAF1-enriched	198	1014333	1014326	-7	ST0641	67.2	0.005440867	0.088101368	0.004476143	0.190401149	0.133352492	0.283732	0.169669614	0.248322756	0.21294049	1	TRUE
1142	1150	YDR277C	chrIV	-	TATA-containing	TAF1-depleted	2192	1015708	1015832	-124	YDR277C	153.6	0.005529766	0.769703756	0.298662174	0.140147026	0.211025656	0.125545694	0.140147026	0.19932095	0.460744262	0	FALSE
1143	1151	tE(CUC)D	chrIV	-	TATA-less	-	1425	1017262	1017290	-28	tE(CUC)D	183.5	0.396920584	NA	NA	NA	NA	NA	NA	NA	NA	NA	NA
1144	1152	CUT518	chrIV	-	TATA-less	TAF1-enriched	0	1020207	1020361	-154	CUT518	4.4	0.427726613	NA	NA	NA	NA	NA	NA	NA	NA	NA	NA
1145	1153	YDR280W	chrIV	+	TATA-less	TAF1-enriched	893	1020830	1020677	-153	YDR280W	674.6	0.00218579	0.46230117	0.011451308	0.039268136	0.675424454	0.002572723	0.458812649	0.96683237	0.049444399	4	TRUE
1146	1154	YDR281C	chrIV	-	TATA-less	TAF1-enriched	459	1022209	1022352	-143	YDR281C	2234.4	0.003667555	0.007685284	0.00449236	0.878857177	0.955219095	0.909301202	0.955219095	0.083717338	0.331716282	2	TRUE
1147	1155	orphan	chrIV	-	TATA-less	TAF1-enriched	2	1022704	1022738	-34	orphan	0.3	NA	NA	NA	NA	NA	NA	NA	NA	NA	NA	NA
1148	1156	YDR282C	chrIV	-	TATA-containing	TAF1-enriched	121	1024741	1024762	-21	YDR282C	166.1	0.011278228	0.523065666	0.532553595	0.099845174	0.499211201	0.131380804	0.051451305	0.441457552	0.283172218	0	FALSE
1149	1157	CUT076	chrIV	+	TATA-less	TAF1-enriched	7	1030553	1030554	1	CUT076	70.2	0.029542865	0.099806331	0.953542988	0.155618037	0.987270566	0.001743304	0.835689256	0.967140642	0.533789588	1	TRUE
1150	1158	YDR284C	chrIV	-	TATA-containing	TAF1-enriched	424	1031528	1031700	-172	YDR284C	5591.4	0.001397353	0.286704576	0.534289817	0.385836087	0.103307359	0.104853432	0.020898452	0.809827039	0.632527771	1	TRUE
1151	1159	YDR288W	chrIV	+	TATA-less	TAF1-enriched	276	1037209	1037156	-53	YDR288W	739.2	0.004816613	0.017168622	0.64193822	0.364238542	0.714282354	0.048519738	0.115056115	0.666070438	0.762317118	2	TRUE
1152	1160	YDR292C	chrIV	-	TATA-less	TAF1-enriched	45	NA	1045143	NA	YDR292C	481.8	0.015471658	0.03775967	0.205119661	0.135450805	0.157876926	0.130876345	0.290434662	0.925295994	0.193851889	1	TRUE
1153	1161	YDR293C	chrIV	-	TATA-less	TAF1-enriched	1067	1049310	1049444	-134	YDR293C	109.7	0.206932872	NA	NA	NA	NA	NA	NA	NA	NA	NA	NA
1154	1162	orphan	chrIV	+	TATA-containing	TAF1-depleted	12	1050357	1050204	-153	orphan	100.7	0.011651641	0.003138171	0.00247301	0.359381247	0.615592169	0.244961043	0.2413644	0.845006101	0.817214838	2	TRUE
1155	1163	YDR294C	chrIV	-	TATA-containing	TAF1-enriched	270	1052248	1052261	-13	YDR294C	536.8	0.007031205	0.382701045	0.988392115	0.042151077	0.216773664	0.003598293	0.334937639	0.797032435	0.0083483	3	TRUE
1156	1164	YDR295C	chrIV	-	TATA-less	TAF1-depleted	87	NA	1054910	NA	YDR295C	991.5	0.0040391	0.255561408	0.51038962	0.003822888	0.29051037	0.807774534	0.052144954	0.575040744	0.011344954	2	TRUE
1157	1165	YDR296W	chrIV	+	TATA-less	TAF1-enriched	875	1055208	1055159	-49	YDR296W	1360	0.00059861	0.965024375	0.017890692	0.082342084	0.636683157	0.006985266	0.252280683	0.390980674	0.17606273	2	TRUE
1158	1166	orphan	chrIV	+	TATA-containing	TAF1-enriched	24	NA	1056052	NA	orphan	12.3	0.131186331	NA	NA	NA	NA	NA	NA	NA	NA	NA	NA
1159	1167	YDR297W	chrIV	+	TATA-containing	TAF1-depleted	1648	1056528	1056510	-18	YDR297W	2898.5	0.263609523	NA	NA	NA	NA	NA	NA	NA	NA	NA	NA
1160	1168	YDR298C	chrIV	-	TATA-less	TAF1-enriched	2244	1058923	1058971	-48	YDR298C	3280.1	0.000174428	0.082296121	0.146169549	0.083572877	1	0.00734898	0.071934218	1	1	1	TRUE
1161	1169	YDR299W	chrIV	+	TATA-containing	TAF1-enriched	175	1059628	1059592	-36	YDR299W	305.1	0.002349639	0.399161825	0.308888264	0.035556334	0.278883663	0.000512259	0.524151472	0.805145665	0.074507301	2	TRUE
1162	1170	YDR300C	chrIV	-	TATA-less	TAF1-enriched	196	1062821	1062853	-32	YDR300C	3027.8	0.020286979	0.351045952	0.448626435	0.052454042	0.198811614	0.0312855	0.731460053	0.451959472	0.13558088	1	TRUE
1163	1171	YDR301W	chrIV	+	TATA-less	TAF1-enriched	976	1063322	1063277	-45	YDR301W	230.7	0.003945162	0.746659586	0.064287792	0.105966862	0.26359254	0.013862725	0.322537698	0.137600235	0.038735762	2	TRUE
1164	1172	ANT061	chrIV	+	TATA-less	TAF1-enriched	16	1071475	1071440	-35	ANT061	7.3	0.387475842	NA	NA	NA	NA	NA	NA	NA	NA	NA	NA
1165	1173	YDR303C	chrIV	-	TATA-less	TAF1-enriched	5198	1071475	1071678	-203	YDR303C	941.2	0.000363174	0.055451467	0.112710745	0.151495641	0.527989418	0.064078578	0.261510814	0.518650984	0.151495641	0	FALSE
1166	1174	YDR305C	chrIV	-	TATA-less	TAF1-enriched	170	1073424	1073462	-38	YDR305C	644.3	0.000541093	0.044284607	0.277283243	0.006893717	0.948706038	0.003194797	0.4791628	0.299200291	0.001807946	4	TRUE
1167	1175	YDR307W	chrIV	+	TATA-less	TAF1-enriched	333	1075878	1075818	-60	YDR307W	1451.3	0.003079733	0.218195836	0.100634304	0.154503792	0.913803524	0.00612419	0.500036364	0.771640629	0.260990023	1	TRUE
1168	1176	YDR308C	chrIV	-	TATA-less	TAF1-depleted	594	1078450	1078490	-40	YDR308C	418.7	0.020253781	0.341925428	0.356984825	0.332544575	0.324615337	0.018931816	0.526959814	0.357500235	0.175928384	1	TRUE
1169	1177	YDR309C	chrIV	-	TATA-less	TAF1-depleted	1774	1080256	1080313	-57	YDR309C	1278.2	0.001004421	0.025494547	0.212228483	0.176812282	0.166844322	0.145262407	0.714763562	0.355946994	0.936675387	1	TRUE
1170	1178	ST0657	chrIV	+	TATA-containing	TAF1-depleted	61	1080869	1080797	-72	ST0657	59.2	0.346004049	NA	NA	NA	NA	NA	NA	NA	NA	NA	NA
1171	1179	YDR310C	chrIV	-	TATA-less	TAF1-enriched	79	1084572	1084594	-22	YDR310C	86.6	0.560764797	NA	NA	NA	NA	NA	NA	NA	NA	NA	NA
1172	1180	YDR311W	chrIV	+	TATA-less	TAF1-enriched	720	1085104	1085062	-42	YDR311W	174.3	0.86888307	NA	NA	NA	NA	NA	NA	NA	NA	NA	NA
1173	1181	YDR312W	chrIV	+	TATA-less	TAF1-enriched	4842	1087572	1087549	-23	YDR312W	202.1	0.014503968	0.006243672	0.831561695	0.342801967	0.629349117	0.561835073	0.342801967	0.17586129	0.960179283	1	TRUE
1174	1182	YDR313C	chrIV	-	TATA-less	TAF1-enriched	187	1090097	1090151	-54	YDR313C	506.3	0.031031277	0.952873753	0.255269287	0.031352283	0.733946985	0.015361009	0.783208021	0.368940084	0.009167447	3	TRUE
1175	1183	YDR314C	chrIV	-	TATA-less	TAF1-enriched	93	1092529	1092574	-45	YDR314C	442.3	0.205210291	NA	NA	NA	NA	NA	NA	NA	NA	NA	NA
1176	1184	YDR316W	chrIV	+	TATA-less	TAF1-enriched	398	1093792	1093759	-33	YDR316W	317.1	0.048542657	0.159318636	0.002040801	0.869723344	0.37580427	0.235732524	0.21258995	0.766901539	0.533128362	1	TRUE
1177	1185	tF(GAA)D	chrIV	-	TATA-containing	-	4474	1095437	1095472	-35	tF(GAA)D	347.5	0.563669735	NA	NA	NA	NA	NA	NA	NA	NA	NA	NA
1178	1186	ST4345	chrIV	-	TATA-less	TAF1-enriched	372	1103539	1103541	-2	ST4345	113.6	0.142208895	NA	NA	NA	NA	NA	NA	NA	NA	NA	NA
1179	1187	YDR319C	chrIV	-	TATA-less	TAF1-enriched	438	NA	1105873	NA	YDR319C	896.3	0.005509161	0.093168282	0.674683312	0.111194998	0.046927848	0.340094473	0.780123284	0.000549227	0.780123284	2	TRUE
1180	1188	CUT081	chrIV	+	TATA-containing	TAF1-enriched	91	1106128	1106114	-14	CUT081	63.5	0.050467693	NA	NA	NA	NA	NA	NA	NA	NA	NA	NA
1181	1189	YDR320C	chrIV	-	TATA-less	TAF1-enriched	357	1108098	1108112	-14	YDR320C	581.1	0.004897691	0.008463037	0.101354739	0.29024439	0.46105841	0.020507227	0.019309177	0.590673631	0.211345599	3	TRUE
1182	1190	YDR321W	chrIV	+	TATA-less	TAF1-enriched	680	1108720	1108668	-52	YDR321W	4252.7	0.00573973	0.000579106	0.226179856	0.04944928	0.284528853	0.606181897	0.087427439	0.060582067	0.66626841	2	TRUE
1183	1191	YDR322W	chrIV	+	TATA-less	TAF1-enriched	3431	1110611	1110572	-39	YDR322W	825.1	0.192731072	NA	NA	NA	NA	NA	NA	NA	NA	NA	NA
1184	1192	YDR322C-A	chrIV	-	TATA-less	TAF1-enriched	219	1112265	1112318	-53	YDR322C-A	4644.9	0.000931304	0.024972573	0.408840306	0.462264111	0.680344957	0.135869705	0.126811859	0.364235144	0.036413888	2	TRUE
1185	1193	YDR323C	chrIV	-	TATA-less	TAF1-enriched	8	1113856	1113988	-132	YDR323C	127.5	0.033944495	0.367299995	0.004788088	0.661354349	0.917536242	0.171464909	0.173223517	0.5171345	0.223011652	1	TRUE
1186	1194	YDR324C	chrIV	-	TATA-less	TAF1-enriched	284	1116674	1116708	-34	YDR324C	629.6	0.024472788	0.013330828	0.019128751	0.505588414	0.021337624	0.356751504	0.017975493	0.779801108	0.485298755	4	TRUE
1187	1195	YDR325W	chrIV	+	TATA-less	TAF1-enriched	185	1117148	1117112	-36	YDR325W	135.4	0.561406613	NA	NA	NA	NA	NA	NA	NA	NA	NA	NA
1188	1196	YDR326C	chrIV	-	TATA-containing	TAF1-enriched	206	1125079	1125112	-33	YDR326C	244.6	0.002350574	0.521851419	0.106139302	0.065509002	0.439295535	0.021712042	0.131835882	0.205493389	0.092509105	1	TRUE
1189	1197	YDR328C	chrIV	-	TATA-less	TAF1-enriched	669	1126019	1126068	-49	YDR328C	6668.6	0.000443212	0.359872622	0.06706836	0.093514246	1	0.027269468	0.323860577	0.288524163	0.019551357	2	TRUE
1190	1198	YDR329C	chrIV	-	TATA-less	TAF1-enriched	291	1127581	1127622	-41	YDR329C	389.9	0.005220054	0.883430926	0.040101831	0.033324085	0.347422107	0.006006275	0.07593051	0.099257663	0.484753353	3	TRUE
1191	1199	YDR330W	chrIV	+	TATA-less	TAF1-enriched	530	1127845	1127813	-32	YDR330W	731.9	0.000620225	0.203993988	0.125259647	0.405579645	0.073237353	0.126517032	0.608781247	0.107272274	0.08410088	0	FALSE
1192	1200	YDR331W	chrIV	+	TATA-less	TAF1-enriched	3107	1129619	1129558	-61	YDR331W	512.4	0.007085782	0.556777419	0.122942071	0.796801548	0.066563957	0.56074936	0.100695663	0.015065719	0.334253098	1	TRUE
1193	1201	YDR332W	chrIV	+	TATA-less	TAF1-enriched	458	1131033	1131001	-32	YDR332W	162.7	0.17028397	NA	NA	NA	NA	NA	NA	NA	NA	NA	NA
1194	1202	YDR333C	chrIV	-	TATA-less	TAF1-enriched	63	1135420	1135468	-48	YDR333C	1398.4	0.001232825	0.013007392	1	0.049649357	1	0.002500836	1	1	0.049649357	4	TRUE
1195	1203	YDR334W	chrIV	+	TATA-less	TAF1-enriched	647	1135819	1135775	-44	YDR334W	130.2	0.401335206	NA	NA	NA	NA	NA	NA	NA	NA	NA	NA
1196	1204	YDR335W	chrIV	+	TATA-less	TAF1-enriched	7885	1140850	1140811	-39	YDR335W	328.9	0.000937547	0.063383441	0.181930946	0.32549524	0.859919358	0.000107451	0.301299843	0.550708243	0.07345726	1	TRUE
1197	1205	orphan	chrIV	+	TATA-less	TAF1-enriched	275	1145246	1145085	-161	orphan	326.8	0.091425308	NA	NA	NA	NA	NA	NA	NA	NA	NA	NA
1198	1206	CUT522	chrIV	-	TATA-less	TAF1-enriched	25	1145893	1146019	-126	CUT522	36.5	0.171737531	NA	NA	NA	NA	NA	NA	NA	NA	NA	NA
1199	1207	YDR337W	chrIV	+	TATA-less	TAF1-enriched	69	1146302	1146281	-21	YDR337W	830.7	0.093296026	NA	NA	NA	NA	NA	NA	NA	NA	NA	NA
1200	1208	CUT082	chrIV	+	TATA-less	TAF1-enriched	17	1149706	1149585	-121	CUT082	4	0.855999348	NA	NA	NA	NA	NA	NA	NA	NA	NA	NA
1201	1209	YDR339C	chrIV	-	TATA-less	TAF1-enriched	327	1150508	1150538	-30	YDR339C	2618.4	0.000531479	0.07252424	0.157626656	0.550764918	0.239154039	0.288388916	0.031985918	0.076820884	0.068440976	1	TRUE
1202	1210	tX(XXX)D	chrIV	-	TATA-less	-	369	1150929	1150952	-23	tX(XXX)D	8.4	0.312456946	NA	NA	NA	NA	NA	NA	NA	NA	NA	NA
1203	1211	YDR341C	chrIV	-	TATA-less	TAF1-enriched	468	1153618	1153647	-29	YDR341C	6108.5	0.013190421	0.071823464	0.054305761	0.972876337	0.891818055	0.947503067	0.891818055	0.860623513	0.891818055	0	FALSE
1204	1212	CUT083	chrIV	+	TATA-less	TAF1-enriched	38	1153928	1153894	-34	CUT083	31.8	0.189171663	NA	NA	NA	NA	NA	NA	NA	NA	NA	NA
1205	1213	YDR345C	chrIV	-	TATA-containing	TAF1-depleted	7416	1164568	1164692	-124	YDR345C	7538	0.000623385	0.086405803	0.066814056	0.108922611	0.884132776	0.038495955	0.323279665	0.850767296	0.307668887	1	TRUE
1206	1214	orphan	chrIV	-	TATA-less	TAF1-enriched	15	1165545	1165595	-50	orphan	6.9	0.054623549	NA	NA	NA	NA	NA	NA	NA	NA	NA	NA
1207	1215	YDR347W	chrIV	+	TATA-less	TAF1-enriched	255	1169124	1169102	-22	YDR347W	861.1	0.004152269	0.591849152	0.012346879	0.227319121	0.579098212	0.119088893	0.452965808	0.658266321	0.102789552	1	TRUE
1208	1216	YDR348C	chrIV	-	TATA-less	TAF1-depleted	1205	1171974	1172022	-48	YDR348C	155.8	0.001190274	0.305519649	0.202834815	0.144507736	0.216936641	0.028210151	0.119846067	0.254878958	0.268539234	1	TRUE
1209	1217	YDR349C	chrIV	-	TATA-less	TAF1-enriched	230	1174227	1174248	-21	YDR349C	1917	0.000346477	0.091131987	0.085400843	0.086141916	0.522604966	0.031529356	0.201013225	0.617377234	1	1	TRUE
1210	1218	ST0685	chrIV	+	TATA-less	TAF1-enriched	24	NA	1174481	NA	ST0685	326.4	0.013396284	0.91793889	0.099253091	0.098401573	0.589103755	0.007478221	0.473069887	0.136673911	0.00726269	2	TRUE
1211	1219	orphan	chrIV	+	TATA-less	TAF1-enriched	6	1175029	1175014	-15	orphan	141.7	0.006733532	0.522459691	0.275644221	0.430593561	0.021400788	0.416809182	0.013891163	0.165276349	0.64997386	2	TRUE
1212	1220	ST4366	chrIV	-	TATA-less	TAF1-enriched	162	1174791	1174821	-30	ST4366	187.5	0.042721366	0.546642426	0.746352113	0.503887204	0.077803929	0.715957936	0.112646279	0.0228004	0.321929889	1	TRUE
1213	1221	YDR350C	chrIV	-	TATA-less	TAF1-enriched	1754	1178006	1178160	-154	YDR350C	156.6	0.206550381	NA	NA	NA	NA	NA	NA	NA	NA	NA	NA
1214	1222	YDR351W	chrIV	+	TATA-less	TAF1-depleted	1131	1178488	1178445	-43	YDR351W	83.1	0.273598133	NA	NA	NA	NA	NA	NA	NA	NA	NA	NA
1215	1223	CUT524	chrIV	-	TATA-less	TAF1-enriched	15	1182966	1182991	-25	CUT524	53.5	0.135241056	NA	NA	NA	NA	NA	NA	NA	NA	NA	NA
1216	1224	YDR353W	chrIV	+	TATA-less	TAF1-enriched	12204	1183295	1183251	-44	YDR353W	4605.1	0.035256463	0.284546919	0.258638818	0.552316682	0.383707276	0.577507946	0.552316682	0.728719732	0.019467075	1	TRUE
1217	1225	YDR354W	chrIV	+	TATA-less	TAF1-enriched	1001	1184757	1184671	-86	YDR354W	1257.7	0.005385059	0.322361711	0.110454128	0.282227988	0.854333105	0.006986673	0.854333105	0.812643627	0.854333105	1	TRUE
1218	1226	orphan	chrIV	+	TATA-less	TAF1-enriched	191	1186133	1186096	-37	orphan	251.4	0.113019083	NA	NA	NA	NA	NA	NA	NA	NA	NA	NA
1219	1227	YDR357C	chrIV	-	TATA-less	TAF1-depleted	137	1189517	1189565	-48	YDR357C	1568.5	0.001422372	0.028529733	0.267187984	0.321410938	0.749075291	0.047468817	0.337268292	0.063138869	0.169009547	2	TRUE
1220	1228	YDR358W	chrIV	+	TATA-containing	TAF1-depleted	2471	1190062	1190025	-37	YDR358W	403.5	0.054616708	NA	NA	NA	NA	NA	NA	NA	NA	NA	NA
1221	1229	YDR359C	chrIV	-	TATA-less	TAF1-depleted	117	1195277	1195403	-126	YDR359C	25.6	0.577052868	NA	NA	NA	NA	NA	NA	NA	NA	NA	NA
1222	1230	YDR361C	chrIV	-	TATA-less	TAF1-depleted	442	1196250	1196297	-47	YDR361C	2071.2	0.000828791	0.248086127	0.060790379	0.130603072	0.021422419	0.064955323	0.021422419	0.074761416	0.188662499	2	TRUE
1223	1231	YDR362C	chrIV	-	TATA-less	TAF1-enriched	312	1198899	1198956	-57	YDR362C	67.7	0.020389509	0.676077549	0.57068455	0.49753222	0.009572181	0.381148615	0.087598462	0.267897726	0.49753222	1	TRUE
1224	1232	YDR363W	chrIV	+	TATA-less	TAF1-enriched	213	1199053	1199007	-46	YDR363W	450.7	0.014964021	0.01579588	0.037787067	0.42766758	0.730457863	0.541686707	0.891659846	0.014230137	0.526766958	3	TRUE
1225	1233	tK(CUU)D1	chrIV	+	TATA-less	-	272	1201755	1201739	-16	tK(CUU)D1	72.7	0.177490526	NA	NA	NA	NA	NA	NA	NA	NA	NA	NA
1226	1234	YDR363W-A	chrIV	+	TATA-less	TAF1-enriched	823	NA	1202106	NA	YDR363W-A	5809.7	0.000979703	0.014272587	1	0.16879764	0.465078332	0.010285875	0.465078332	0.676889185	0.023853215	3	TRUE
1227	1235	YDR364C	chrIV	-	TATA-less	TAF1-enriched	63	1204168	1204233	-65	YDR364C	350.8	0.001144959	0.083134854	0.153581352	0.560425071	0.112485222	0.942542915	0.03594474	0.261736119	0.148862108	1	TRUE
1228	1236	YDR365C	chrIV	-	TATA-less	TAF1-enriched	331	1206390	1206458	-68	YDR365C	4493.4	0.023571633	0.746985056	0.069004748	0.541573851	0.351483209	0.74002665	0.772464063	0.010123272	0.108184458	1	TRUE
1229	1237	YDR367W	chrIV	+	TATA-less	TAF1-enriched	399	1212852	1212805	-47	YDR367W	939.1	0.015609479	0.162501091	0.733060782	0.200212858	0.643677202	0.908572089	0.069574238	0.55039586	0.08764986	0	FALSE
1230	1238	YDR368W	chrIV	+	TATA-less	TAF1-enriched	1445	1213929	1213853	-76	YDR368W	567.4	0.111311261	NA	NA	NA	NA	NA	NA	NA	NA	NA	NA
1231	1239	orphan	chrIV	-	TATA-less	TAF1-depleted	34	1217550	1217572	-22	orphan	107.3	0.041215228	0.476826374	0.042091165	0.262176031	0.412741643	0.339697529	0.283024662	0.090277736	0.049507147	2	TRUE
1232	1240	YDR370C	chrIV	-	TATA-containing	TAF1-enriched	81	1219097	1219114	-17	YDR370C	345.2	0.004945435	0.020791873	0.079130444	0.076549359	0.202589906	0.024764556	0.968037784	0.168821047	0.742481319	2	TRUE
1233	1241	YDR371W	chrIV	+	TATA-less	TAF1-enriched	44	1219390	1219373	-17	YDR371W	297.8	0.023867454	0.140054933	0.859453108	0.025703318	0.348488092	0.005169067	0.517910534	0.531289801	0.136985736	2	TRUE
1234	1242	YDR372C	chrIV	-	TATA-less	TAF1-enriched	144	1222399	1222412	-13	YDR372C	1872.6	0.014383759	0.115894195	0.590136094	0.1992274	0.402462135	0.000563784	0.004419037	0.068451278	0.131806114	2	TRUE
1235	1243	YDR373W	chrIV	+	TATA-less	TAF1-depleted	172	1222718	1222699	-19	YDR373W	417.6	0.000427476	0.149630855	0.036821041	0.233331482	0.439479173	0.006058642	0.273434823	0.867890312	0.033507358	3	TRUE
1236	1244	YDR374W-A	chrIV	+	TATA-less	TAF1-enriched	159	1224797	1224739	-58	YDR374W-A	284.7	0.025044106	0.126312721	0.610330489	0.127708728	0.260819461	0.051672586	0.222406195	0.571221759	0.792419056	0	FALSE
1237	1245	YDR375C	chrIV	-	TATA-less	TAF1-enriched	319	1226535	1226552	-17	YDR375C	192.4	0.62805662	NA	NA	NA	NA	NA	NA	NA	NA	NA	NA
1238	1246	YDR377W	chrIV	+	TATA-less	TAF1-depleted	325	1228579	1228544	-35	YDR377W	1035.8	0.00307706	0.219777986	0.558990084	0.214893105	0.024550479	0.218979117	0.012264217	0.269034145	0.496427202	2	TRUE
1239	1247	YDR378C	chrIV	-	TATA-less	TAF1-enriched	888	1229571	1229613	-42	YDR378C	8850.7	0.000496589	0.082277704	0.036501585	0.0279311	0.463710364	0.001555467	0.463710364	0.344160132	0.463710364	3	TRUE
1240	1248	YDR379W	chrIV	+	TATA-less	TAF1-enriched	91	1230266	1230123	-143	YDR379W	65.8	0.985882568	NA	NA	NA	NA	NA	NA	NA	NA	NA	NA
1241	1249	ST4385	chrIV	-	TATA-less	TAF1-enriched	447	1236142	1236163	-21	ST4385	90.7	0.27150186	NA	NA	NA	NA	NA	NA	NA	NA	NA	NA
1242	1250	YDR381W	chrIV	+	TATA-containing	TAF1-depleted	1132	1236648	1236461	-187	YDR381W	3279.4	0.000257985	0.008275225	0.000914936	0.079830753	0.343052552	0.023734817	0.001924916	0.105609622	0.079830753	4	TRUE
1243	1251	YDR381C-A	chrIV	-	TATA-containing	TAF1-enriched	207	1238962	1238997	-35	YDR381C-A	83.2	0.028584905	0.323398296	0.309371063	0.29742085	0.440385379	0.19928934	0.7564029	0.221720067	0.019777844	1	TRUE
1244	1252	orphan	chrIV	-	TATA-less	TAF1-enriched	119	1238962	1239033	-71	orphan	29.4	0.829693607	NA	NA	NA	NA	NA	NA	NA	NA	NA	NA
1245	1253	YDR382W	chrIV	+	TATA-less	TAF1-depleted	27041	1239585	1239411	-174	YDR382W	105573.2	0.000208782	0.189381845	0.048997324	0.19122102	1	0.04510579	0.19122102	0.205701598	0.109366945	2	TRUE
1246	1254	CUT088	chrIV	+	TATA-less	TAF1-enriched	107	1240317	1240183	-134	CUT088	88	0.145546404	NA	NA	NA	NA	NA	NA	NA	NA	NA	NA
1247	1255	YDR384C	chrIV	-	TATA-less	TAF1-depleted	2245	NA	1242146	NA	YDR384C	349.2	0.003292683	0.871098646	0.051515844	0.187849167	0.328258859	0.386629717	0.097659029	0.11051282	0.177244866	0	FALSE
1248	1256	CUT089	chrIV	+	TATA-less	TAF1-enriched	58	1242852	1242725	-127	CUT089	44.9	0.159350442	NA	NA	NA	NA	NA	NA	NA	NA	NA	NA
1249	1258	YDR385W	chrIV	+	TATA-less	TAF1-depleted	55859	1243221	1243145	-76	YDR385W	33418.7	0.000399937	0.103523658	0.068961313	0.094736515	0.872356584	0.085146457	0.247356471	0.395093411	0.139374092	0	FALSE
1250	1259	YDR386W	chrIV	+	TATA-less	TAF1-enriched	309	NA	1246063	NA	YDR386W	146.8	0.790131959	NA	NA	NA	NA	NA	NA	NA	NA	NA	NA
1251	1260	YDR387C	chrIV	-	TATA-less	TAF1-enriched	937	1249906	1249918	-12	YDR387C	703.4	0.006369182	0.020909362	0.089105571	0.122069064	1	0.004263132	1	1	0.439478875	2	TRUE
1252	1261	YDR388W	chrIV	+	TATA-less	TAF1-enriched	686	1250199	1250135	-64	YDR388W	4297.9	0.04095415	0.313946799	0.350300913	0.302472621	0.854132984	0.13457198	0.239984234	0.347697008	0.198117483	0	FALSE
1253	1262	orphan	chrIV	-	TATA-less	TAF1-enriched	27	1251618	1251661	-43	orphan	14.8	0.385677805	NA	NA	NA	NA	NA	NA	NA	NA	NA	NA
1254	1263	orphan	chrIV	+	TATA-less	TAF1-enriched	529	1252041	1252012	-29	orphan	748	0.004381162	0.033946601	0.196094502	0.143226314	0.655937385	0.459596402	0.588507786	0.69631636	0.181357319	1	TRUE
1255	1264	YDR390C	chrIV	-	TATA-less	TAF1-enriched	14170	1257072	1257079	-7	YDR390C	1067.8	0.243697462	NA	NA	NA	NA	NA	NA	NA	NA	NA	NA
1256	1265	orphan	chrIV	-	TATA-containing	TAF1-enriched	7341	1258062	1258063	-1	orphan	4109.8	0.000190715	0.006489119	0.407426992	0.03376215	0.339013779	0.006131715	0.200466814	0.098379629	0.833145127	3	TRUE
1257	1266	YDR392W	chrIV	+	TATA-less	TAF1-enriched	333	1258682	1258659	-23	YDR392W	354.2	0.008232861	0.164118015	0.543938979	0.941834179	0.980596101	0.281018971	0.056755333	0.002665956	0.001524849	2	TRUE
1258	1267	YDR393W	chrIV	+	TATA-less	TAF1-enriched	41	1259886	1259884	-2	YDR393W	481.6	0.003920714	0.941812629	0.447783829	0.743040226	0.04475402	0.09652503	0.069514902	0.025090626	0.115214204	2	TRUE
1259	1268	ST4395	chrIV	-	TATA-less	TAF1-depleted	57	1261353	1261373	-20	ST4395	454.2	0.001753668	0.230810523	0.040772808	0.05783729	0.00385959	0.347061374	0.00385959	0.569820465	0.81644971	3	TRUE
1260	1269	YDR394W	chrIV	+	TATA-less	TAF1-enriched	2536	1261633	1261587	-46	YDR394W	3613.3	0.00220301	0.326299025	0.053126629	0.067311536	0.923286983	0.026626244	0.923286983	0.481150938	0.585295091	1	TRUE
1261	1270	YDR395W	chrIV	+	TATA-less	TAF1-enriched	2045	1263255	1263216	-39	YDR395W	1381.3	0.023699252	0.207897034	0.069395754	0.847352051	0.261477581	0.395831518	0.261477581	0.648671188	0.542141828	0	FALSE
1262	1271	YDR397C	chrIV	-	TATA-containing	TAF1-depleted	295	1266856	1266957	-101	YDR397C	2449.6	0.000216562	0.214136958	0.123167865	0.646178093	0.622811688	0.027712279	0.309377047	0.027712279	0.08816698	2	TRUE
1263	1272	YDR398W	chrIV	+	TATA-less	TAF1-enriched	1622	1267460	1267434	-26	YDR398W	1122.2	0.032907518	0.50621464	0.375442684	0.12707682	0.331588189	0.048871557	0.331588189	0.210041204	0.331588189	1	TRUE
1264	1273	orphan	chrIV	-	TATA-containing	TAF1-enriched	186	1269380	1269395	-15	orphan	21.9	0.148789396	NA	NA	NA	NA	NA	NA	NA	NA	NA	NA
1265	1274	CUT528	chrIV	-	TATA-less	TAF1-enriched	17	1269380	1269484	-104	CUT528	23.5	0.143838741	NA	NA	NA	NA	NA	NA	NA	NA	NA	NA
1266	1275	YDR399W	chrIV	+	TATA-less	TAF1-depleted	18636	1270126	1270004	-122	YDR399W	3181.4	0.000573209	0.849320918	0.349628276	0.171069089	0.186584924	0.1508883	0.088200494	0.55584269	0.171069089	0	FALSE
1267	1276	YDR400W	chrIV	+	TATA-less	TAF1-enriched	645	NA	1271039	NA	YDR400W	1855.7	0.000910931	0.115945468	0.060884428	0.320467176	0.320467176	0.00477666	0.320467176	0.864213198	0.320467176	1	TRUE
1268	1277	YDR404C	chrIV	-	TATA-less	TAF1-enriched	21534	1277297	1277361	-64	YDR404C	2064.3	0.013559767	0.918875965	0.620812884	0.334900435	0.508320381	0.097635108	0.065633617	0.845017882	0.075541426	0	FALSE
1269	1278	YDR405W	chrIV	+	TATA-less	TAF1-enriched	41	1277654	1277574	-80	YDR405W	227.9	0.010588929	0.611098996	0.076310879	0.286273084	0.667402002	0.009628682	0.76235251	0.565082933	0.232612373	1	TRUE
1270	1279	orphan	chrIV	-	TATA-containing	TAF1-enriched	11	1278436	1278504	-68	orphan	7.9	0.675649466	NA	NA	NA	NA	NA	NA	NA	NA	NA	NA
1271	1280	YDR406W	chrIV	+	TATA-containing	TAF1-depleted	2003	1279204	1279084	-120	YDR406W	1667.6	0.008448054	0.174809201	0.965086663	0.014468964	0.024220818	0.090648055	0.666074303	0.231395136	0.284230791	2	TRUE
1272	1281	ST4401	chrIV	-	TATA-less	TAF1-enriched	232	1279881	1279925	-44	ST4401	156.5	0.19104535	NA	NA	NA	NA	NA	NA	NA	NA	NA	NA
1273	1282	YDR407C	chrIV	-	TATA-containing	TAF1-enriched	139	1287991	1288014	-23	YDR407C	612	0.00363696	0.210760451	0.140932855	0.276297076	0.36215756	0.354148987	0.645758185	0.111189281	0.077383545	0	FALSE
1274	1283	orphan	chrIV	+	TATA-containing	TAF1-enriched	1603	1288290	1288266	-24	orphan	73.1	0.055407086	NA	NA	NA	NA	NA	NA	NA	NA	NA	NA
1275	1284	YDR408C	chrIV	-	TATA-less	TAF1-enriched	1207	1288906	1288915	-9	YDR408C	2752	0.003214547	0.016139356	0.540291375	0.129182923	0.987256798	0.011883077	0.713354961	0.665005542	0.689673749	2	TRUE
1276	1285	YDR409W	chrIV	+	TATA-less	TAF1-enriched	185	1289399	1289376	-23	YDR409W	180	0.059251817	NA	NA	NA	NA	NA	NA	NA	NA	NA	NA
1277	1286	orphan	chrIV	+	TATA-less	TAF1-enriched	47	1292599	1292536	-63	orphan	28.2	0.149126	NA	NA	NA	NA	NA	NA	NA	NA	NA	NA
1278	1287	YDR410C	chrIV	-	TATA-containing	TAF1-enriched	648	1293099	1293109	-10	YDR410C	391.7	0.00524943	1	1	0.020683862	0.643549904	0.004384024	0.643549904	0.550242835	0.094329794	2	TRUE
1279	1288	YDR411C	chrIV	-	TATA-less	TAF1-enriched	4640	1294391	1294444	-53	YDR411C	2819.2	0.000772494	0.095199363	0.064694463	0.26710118	0.26710118	0.084048296	0.015719385	0.473775929	0.744121077	1	TRUE
1280	1289	YDR412W	chrIV	+	TATA-less	TAF1-enriched	343	1294687	1294640	-47	YDR412W	1233	0.001038281	0.033640964	0.363697365	0.015039501	0.05512904	0.016708188	0.37307909	0.474725077	0.815985996	3	TRUE
1281	1290	orphan	chrIV	+	TATA-less	TAF1-enriched	457	1297046	1297001	-45	orphan	20	0.568573488	NA	NA	NA	NA	NA	NA	NA	NA	NA	NA
1282	1291	YDR415C	chrIV	-	TATA-less	TAF1-enriched	885	1298174	1298189	-15	YDR415C	166.9	0.021534811	0.103279089	0.904822678	0.121803608	0.222545401	0.224212575	0.015041068	0.890719897	0.216398875	1	TRUE
1283	1292	YDR416W	chrIV	+	TATA-less	TAF1-enriched	73	1298388	1298369	-19	YDR416W	332.3	0.036217459	0.302769902	0.228325858	0.464547163	0.679321913	0.04647584	0.484189176	0.304744389	0.01566048	2	TRUE
1284	1293	CUT532	chrIV	-	TATA-less	TAF1-enriched	60	1300930	1300968	-38	CUT532	39.5	0.040168107	0.134324768	0.322915428	0.381128554	0.4736339	0.285067915	0.058098578	0.918130566	0.555735712	0	FALSE
1285	1294	orphan	chrIV	+	TATA-less	TAF1-enriched	29	1301424	1301281	-143	orphan	18.9	0.140808782	NA	NA	NA	NA	NA	NA	NA	NA	NA	NA
1286	1295	YDR418W	chrIV	+	TATA-less	TAF1-enriched	133605	1301639	1301582	-57	YDR418W	39718.8	0.000720554	0.011305883	0.035421247	0.690947681	0.058693435	0.607769612	0.001785567	0.006668826	0.480257553	4	TRUE
1287	1296	YDR420W	chrIV	+	TATA-less	TAF1-enriched	1047	1306040	1306017	-23	YDR420W	391.3	0.171571418	NA	NA	NA	NA	NA	NA	NA	NA	NA	NA
1288	1297	YDR422C	chrIV	-	TATA-less	TAF1-enriched	680	NA	1317829	NA	YDR422C	965.7	0.158737971	NA	NA	NA	NA	NA	NA	NA	NA	NA	NA
1289	1298	orphan	chrIV	+	TATA-less	TAF1-enriched	10	1318265	1318142	-123	orphan	12.3	0.420097676	NA	NA	NA	NA	NA	NA	NA	NA	NA	NA
1290	1299	YDR423C	chrIV	-	TATA-less	TAF1-enriched	129	1319188	1319219	-31	YDR423C	1318.1	0.005663102	0.030608455	0.004063871	0.799237109	0.161860958	0.100647532	0.098295337	0.666503164	0.702830915	2	TRUE
1291	1300	YDR424C	chrIV	-	TATA-less	TAF1-enriched	295	1319831	1319877	-46	YDR424C	1901.6	0.000443275	0.005373265	0.521337398	0.055379186	0.016626638	0.047847318	0.338090667	0.804644914	0.277624748	3	TRUE
1292	1301	YDR427W	chrIV	+	TATA-less	TAF1-enriched	1227	1322221	1322173	-48	YDR427W	345.1	0.000919087	0.628974363	0.941640824	0.15576723	0.040857473	0.144347242	0.008731859	0.500976703	0.955233046	2	TRUE
1293	1302	YDR429C	chrIV	-	TATA-less	TAF1-enriched	1552	1325280	1325319	-39	YDR429C	9062.2	0.002031905	0.066748667	0.157401728	0.076715562	1	0.567804789	0.011770702	0.843238041	1	1	TRUE
1294	1303	YDR432W	chrIV	+	TATA-less	TAF1-enriched	16083	1328815	1328759	-56	YDR432W	37505.4	0.000146407	0.321300465	0.07567714	0.346956375	0.270172197	0.019045091	0.173160984	0.154580891	0.069346458	1	TRUE
1295	1304	YDR434W	chrIV	+	TATA-containing	TAF1-enriched	267	1331177	1331141	-36	YDR434W	1006.1	0.001598269	0.060511738	0.123617743	0.007303045	0.126988227	6.84E-05	0.19319347	0.467929508	0.01984368	3	TRUE
1296	1305	CUT094	chrIV	+	TATA-less	TAF1-enriched	1087	1334338	1334253	-85	CUT094	116.2	0.051514818	NA	NA	NA	NA	NA	NA	NA	NA	NA	NA
1297	1306	YDR436W	chrIV	+	TATA-less	TAF1-depleted	778	1334724	1334576	-148	YDR436W	197.1	0.046575594	0.097769168	0.123664687	0.028691563	0.057261554	0.206504597	0.412562471	0.491387398	0.057261554	1	TRUE
1298	1307	YDR437W	chrIV	+	TATA-less	TAF1-enriched	45	1337294	1337268	-26	YDR437W	359.8	0.001687775	0.725495742	0.135627166	0.360973541	0.033045747	0.021641237	0.10551647	0.604979084	0.282922739	2	TRUE
1299	1308	YDR439W	chrIV	+	TATA-less	TAF1-enriched	70	1339629	1339467	-162	YDR439W	41.9	0.113856384	NA	NA	NA	NA	NA	NA	NA	NA	NA	NA
1300	1309	YDR441C	chrIV	-	TATA-containing	TAF1-enriched	1875	1345019	1345103	-84	YDR441C	593.5	0.011911388	0.038639509	0.122655599	0.167595467	0.672466151	0.124934736	0.993635571	0.359398205	0.411303771	1	TRUE
1301	1310	YDR443C	chrIV	-	TATA-less	TAF1-enriched	81	1349969	1349985	-16	YDR443C	414.3	0.000795139	0.36904668	0.275848366	0.027673034	0.211241948	0.00792608	0.211241948	0.354073099	0.194098099	2	TRUE
1302	1311	YDR444W	chrIV	+	TATA-less	TAF1-enriched	256	1350266	1350225	-41	YDR444W	212.9	0.458797896	NA	NA	NA	NA	NA	NA	NA	NA	NA	NA
1303	1312	YDR447C	chrIV	-	TATA-less	TAF1-enriched	767	1355525	1355588	-63	YDR447C	3652.1	0.013412283	0.517066106	0.680131427	0.208346906	0.401609978	0.175887667	0.099920511	0.327726564	0.477883376	0	FALSE
1304	1313	YDR448W	chrIV	+	TATA-containing	TAF1-depleted	143	1356060	1356029	-31	YDR448W	210.6	0.015070096	0.22252131	0.504124834	0.156828081	0.599606039	0.011534214	0.786823606	0.805336113	0.031746117	2	TRUE
1305	1314	YDR449C	chrIV	-	TATA-less	TAF1-enriched	253	1358892	1358941	-49	YDR449C	1251.9	0.002027151	0.037583775	0.677502873	0.070919222	0.883580387	0.0197255	0.464070994	0.85005922	0.147603201	2	TRUE
1306	1315	CUT095	chrIV	+	TATA-less	TAF1-enriched	15	1359178	1359173	-5	CUT095	6.9	0.066806915	NA	NA	NA	NA	NA	NA	NA	NA	NA	NA
1307	1316	YDR450W	chrIV	+	TATA-less	TAF1-enriched	7257	NA	1359900	NA	YDR450W	44626.4	0.000142303	0.024163201	0.313165071	0.298397089	0.068791813	0.179441926	0.068791813	0.110893609	0.068791813	1	TRUE
1308	1317	YDR451C	chrIV	-	TATA-containing	TAF1-depleted	235	1362097	1362239	-142	YDR451C	132.2	0.002801086	0.395691033	0.060873954	0.590997872	0.121620947	0.032078335	0.053235974	0.425267701	0.096854887	1	TRUE
1309	1318	YDR452W	chrIV	+	TATA-less	TAF1-enriched	276	1362762	1362744	-18	YDR452W	1828.4	0.000368877	0.044412334	0.247119054	0.124844005	0.011222851	0.067159583	0.011222851	1	0.242908261	3	TRUE
1310	1319	orphan	chrIV	+	TATA-less	TAF1-enriched	2	1365503	1365385	-118	orphan	0.7	0.122325228	NA	NA	NA	NA	NA	NA	NA	NA	NA	NA
1311	1320	YDR453C	chrIV	-	TATA-less	TAF1-depleted	1886	1365633	1365725	-92	YDR453C	213.9	0.040651796	0.150586975	0.827587158	0.408183733	0.56691312	0.139285728	0.134880093	0.233662002	0.181524737	0	FALSE
1312	1321	YDR454C	chrIV	-	TATA-less	TAF1-enriched	346	1366821	1366843	-22	YDR454C	3652	0.000238106	0.529925885	0.03542481	0.025076118	0.522130229	0.025676785	0.109562443	0.264622175	0.353358551	3	TRUE
1313	1322	CUT097	chrIV	+	TATA-less	TAF1-enriched	49	1367245	1367092	-153	CUT097	20.6	0.055679382	NA	NA	NA	NA	NA	NA	NA	NA	NA	NA
1314	1323	YDR456W	chrIV	+	TATA-less	TAF1-enriched	495	1367487	1367457	-30	YDR456W	635.5	0.008761034	0.316357192	0.00560292	0.108261911	0.046212777	0.215020929	0.443254261	0.958452465	0.01727346	3	TRUE
1315	1324	YDR457W	chrIV	+	TATA-less	TAF1-depleted	86	1369870	1369710	-160	YDR457W	877.9	0.00107756	0.641989345	0.029308751	0.339615535	0.143134227	0.041938981	0.097883196	0.175072628	0.152032877	2	TRUE
1316	1325	YDR458C	chrIV	-	TATA-less	TAF1-enriched	65	1382010	1382072	-62	YDR458C	251.7	0.016986944	0.206021383	0.560959585	0.993647807	0.359898566	0.025724457	0.327456764	0.125661676	0.248336337	1	TRUE
1317	1326	YDR459C	chrIV	-	TATA-less	TAF1-enriched	297	1383493	1383539	-46	YDR459C	324.6	0.009442523	0.127159625	0.407628759	0.55597845	0.156669064	0.13907346	0.122666547	0.070610788	0.886110288	0	FALSE
1318	1327	YDR460W	chrIV	+	TATA-less	TAF1-enriched	5576	1383733	1383699	-34	YDR460W	630.6	0.032519481	0.420358858	0.869617624	0.427892667	0.749911694	0.381148615	0.118503432	0.093405159	0.60661366	0	FALSE
1319	1328	CUT534	chrIV	-	TATA-less	TAF1-enriched	352	1384677	1384764	-87	CUT534	29.6	0.107744811	NA	NA	NA	NA	NA	NA	NA	NA	NA	NA
1320	1329	YDR461W	chrIV	+	TATA-containing	TAF1-depleted	35301	NA	1385153	NA	YDR461W	2342.8	0.001324764	0.255832175	0.255832175	0.201719487	0.974538481	0.052794104	0.263958201	0.804733562	0.58741633	0	FALSE
1321	1330	YDR461C-A	chrIV	-	TATA-less	TAF1-enriched	514	1385761	1385785	-24	YDR461C-A	414.8	0.002023404	0.086205863	0.214071555	0.413220156	0.4910638	0.593755974	0.142552715	0.041402674	0.165949433	1	TRUE
1322	1331	YDR462W	chrIV	+	TATA-less	TAF1-enriched	324	1386074	1386039	-35	YDR462W	1173	0.00241261	0.035979403	0.988216684	0.015234729	0.697808776	0.001730758	0.697808776	0.107784158	0.627428022	3	TRUE
1323	1332	YDR463W	chrIV	+	TATA-less	TAF1-enriched	2456	1386833	1386780	-53	YDR463W	179.2	0.117398086	NA	NA	NA	NA	NA	NA	NA	NA	NA	NA
1324	1333	YDR464W	chrIV	+	TATA-less	TAF1-enriched	55	NA	1388745	NA	YDR464W	731.4	0.005441153	0.173265737	0.005378768	0.012421829	0.075299158	0.10097375	0.640356938	0.840658866	0.876243275	2	TRUE
1325	1334	YDR465C	chrIV	-	TATA-less	TAF1-enriched	1281	1394561	1394602	-41	YDR465C	2477.1	0.007902791	0.976169919	0.16942093	0.098439979	0.441912047	0.118046014	0.960853078	0.320839608	0.831566117	0	FALSE
1326	1335	orphan	chrIV	-	TATA-less	TAF1-enriched	8	1394928	1394998	-70	orphan	0.9	0.205713198	NA	NA	NA	NA	NA	NA	NA	NA	NA	NA
1327	1336	YDR466W	chrIV	+	TATA-less	TAF1-enriched	251	1394809	1394786	-23	YDR466W	7.8	0.173912831	NA	NA	NA	NA	NA	NA	NA	NA	NA	NA
1328	1337	YDR468C	chrIV	-	TATA-less	TAF1-depleted	141	1398754	1398806	-52	YDR468C	817.3	0.228229917	NA	NA	NA	NA	NA	NA	NA	NA	NA	NA
1329	1338	orphan	chrIV	-	TATA-less	TAF1-enriched	0	NA	1399225	NA	orphan	0.3	0.239906882	NA	NA	NA	NA	NA	NA	NA	NA	NA	NA
1330	1339	YDR471W	chrIV	+	TATA-less	TAF1-enriched	2351	1401766	1401700	-66	YDR471W	21798.9	0.000315111	0.021386645	0.493907406	0.048189194	0.453614939	0.064747791	0.13392448	1	0.048189194	3	TRUE
1331	1340	orphan	chrIV	-	TATA-less	TAF1-enriched	3	NA	1402650	NA	orphan	16.8	0.145172627	NA	NA	NA	NA	NA	NA	NA	NA	NA	NA
1332	1341	orphan	chrIV	+	TATA-containing	TAF1-depleted	7470	1403017	1402919	-98	orphan	167930.7	0.034033197	0.007581723	1	0.639378088	0.639378088	0.545232586	0.639378088	0.545232586	0.639378088	1	TRUE
1333	1342	YDR472W	chrIV	+	TATA-less	TAF1-enriched	1456	1403317	1403264	-53	YDR472W	878	0.000425975	0.348953637	0.639562624	0.974421792	0.167984201	0.125634065	0.058528524	0.014598145	0.089255108	1	TRUE
1334	1343	YDR473C	chrIV	-	TATA-less	TAF1-enriched	373	1405869	1405908	-39	YDR473C	51.4	0.574616819	NA	NA	NA	NA	NA	NA	NA	NA	NA	NA
1335	1344	ST0764	chrIV	+	TATA-less	TAF1-enriched	87	1406125	1406086	-39	ST0764	77	0.092919764	NA	NA	NA	NA	NA	NA	NA	NA	NA	NA
1336	1345	YDR475C	chrIV	-	TATA-less	TAF1-depleted	98	1410061	1410359	-298	YDR475C	42.2	0.028348124	0.976848954	0.1041417	0.026601942	0.469551792	0.030398733	0.867453241	0.674003976	0.033842655	3	TRUE
1337	1346	YDR476C	chrIV	-	TATA-containing	TAF1-enriched	1681	1411121	1411151	-30	YDR476C	1118.9	0.000153217	0.046961854	0.16529013	0.146824504	1	0.001323192	1	1	0.097296778	2	TRUE
1338	1347	YDR477W	chrIV	+	TATA-less	TAF1-enriched	488	1412124	1412092	-32	YDR477W	1531.5	0.006374995	0.677454037	0.027910713	0.182081943	0.228516365	0.092830784	0.228516365	0.274647241	0.922220557	1	TRUE
1339	1348	YDR478W	chrIV	+	TATA-less	TAF1-enriched	86	1414605	1414538	-67	YDR478W	300.4	0.007685333	0.167287885	0.07859094	0.534576502	0.315759253	0.046140754	0.050153873	0.067303597	0.258222461	1	TRUE
1340	1349	YDR479C	chrIV	-	TATA-less	TAF1-enriched	270	1416883	1416922	-39	YDR479C	456.7	0.004105327	0.182075697	0.059355254	0.044440781	0.352638426	0.309939296	0.85501848	0.466503477	0.096842068	1	TRUE
1341	1350	YDR480W	chrIV	+	TATA-less	TAF1-enriched	207	1417359	1417354	-5	YDR480W	108.8	0.007480494	0.760536865	0.045197383	0.176580375	0.786951117	0.006337628	0.332146689	0.696559609	0.06287049	2	TRUE
1342	1351	YDR481C	chrIV	-	TATA-containing	TAF1-depleted	1166	1420282	1420305	-23	YDR481C	1432.7	0.103768541	NA	NA	NA	NA	NA	NA	NA	NA	NA	NA
1343	1352	YDR482C	chrIV	-	TATA-less	TAF1-enriched	595	1420837	1420871	-34	YDR482C	406.1	0.1115088	NA	NA	NA	NA	NA	NA	NA	NA	NA	NA
1344	1353	YDR483W	chrIV	+	TATA-less	TAF1-enriched	13178	1421178	1421131	-47	YDR483W	2298.6	0.059636947	NA	NA	NA	NA	NA	NA	NA	NA	NA	NA
1345	1354	YDR484W	chrIV	+	TATA-less	TAF1-enriched	273	1422778	1422738	-40	YDR484W	794.5	0.010976926	0.005235478	0.636391926	0.593303778	0.307937787	0.983331192	0.833367094	0.738164993	0.292833653	1	TRUE
1346	1355	CUT098	chrIV	+	TATA-less	TAF1-depleted	0	1427424	1427346	-78	CUT098	41.5	0.08174555	NA	NA	NA	NA	NA	NA	NA	NA	NA	NA
1347	1356	YDR486C	chrIV	-	TATA-less	TAF1-enriched	600	1428093	1428129	-36	YDR486C	6268.3	0.008343214	0.051990813	0.248590038	0.11605163	0.276028088	0.042470433	0.511246987	0.15964655	0.11605163	1	TRUE
1348	1357	YDR487C	chrIV	-	TATA-containing	TAF1-depleted	1018	1428981	1429050	-69	YDR487C	6479.7	0.012017763	0.072403348	0.438851958	0.065761689	0.83522503	0.002085311	0.83522503	0.321437698	0.154436479	1	TRUE
1349	1358	YDR488C	chrIV	-	TATA-less	TAF1-enriched	107	1430745	1430782	-37	YDR488C	484.1	0.018910321	0.988394795	0.374931224	0.050012807	0.138382566	0.064121021	0.043012403	0.742059955	0.271580318	1	TRUE
1350	1359	YDR489W	chrIV	+	TATA-less	TAF1-enriched	486	1431049	1431014	-35	YDR489W	488.3	0.000469443	0.01925068	0.013984051	0.021927934	0.205514343	0.071876	0.531980507	0.040543818	0.511157675	4	TRUE
1351	1360	YDR490C	chrIV	-	TATA-less	TAF1-enriched	97	1434290	1434341	-51	YDR490C	435.2	0.047655233	0.138670654	0.016198963	0.840891077	0.339280343	0.187974725	0.65873642	0.892794143	0.878735097	1	TRUE
1352	1361	YDR492W	chrIV	+	TATA-containing	TAF1-depleted	547	1434765	1434723	-42	YDR492W	600	0.237212194	NA	NA	NA	NA	NA	NA	NA	NA	NA	NA
1353	1362	YDR493W	chrIV	+	TATA-less	TAF1-enriched	363	NA	1436135	NA	YDR493W	2693.5	0.268306257	NA	NA	NA	NA	NA	NA	NA	NA	NA	NA
1354	1363	CUT536	chrIV	-	TATA-less	TAF1-enriched	4	1436649	1436681	-32	CUT536	41.7	0.026718356	0.201719775	0.551969919	0.702895908	0.203593229	0.092495347	0.726616615	0.511477901	0.656331851	0	FALSE
1355	1364	YDR494W	chrIV	+	TATA-less	TAF1-enriched	825	1436922	1436897	-25	YDR494W	4354.5	0.000955658	0.269642873	0.09775665	0.534623265	0.180253442	0.02533784	0.326854377	0.526805221	0.534623265	1	TRUE
1356	1365	YDR495C	chrIV	-	TATA-less	TAF1-enriched	14	1441161	1441213	-52	YDR495C	332.8	0.018386511	0.596894692	0.034388595	0.398175188	0.050547115	0.37724641	0.050547115	0.224214445	0.024769449	2	TRUE
1357	1366	YDR496C	chrIV	-	TATA-less	TAF1-enriched	269	1443381	1443431	-50	YDR496C	2060.6	0.000637199	0.300840678	0.041379854	0.021496531	0.105421795	0.090432438	0.331313774	0.403093509	1	2	TRUE
1358	1367	YDR497C	chrIV	-	TATA-containing	TAF1-depleted	325	1445368	1445524	-156	YDR497C	4182.9	0.010879827	0.018237948	0.745481308	0.254499373	0.289748313	0.925189932	0.289748313	0.171706143	0.193217958	1	TRUE
1359	1368	YDR498C	chrIV	-	TATA-less	TAF1-enriched	190	1446982	1447037	-55	YDR498C	729	0.013972307	0.792711745	0.144303959	0.101155607	0.428564323	0.991763263	0.67170216	0.092430375	0.730960357	0	FALSE
1360	1369	YDR499W	chrIV	+	TATA-less	TAF1-enriched	172	1447846	1447837	-9	YDR499W	177.1	0.004146046	0.062224456	0.115641344	0.91105458	0.100236112	0.284029464	0.860653891	0.983563032	0.314715812	0	FALSE
1361	1370	YDR500C	chrIV	-	TATA-less	TAF1-enriched	517	1450787	1450863	-76	YDR500C	2946.7	0.000881467	0.065920143	0.129045422	0.198082738	0.198082738	0.204303807	0.171633742	0.297253854	0.302435175	0	FALSE
1362	1371	YDR502C	chrIV	-	TATA-less	TAF1-depleted	2930	1454412	1454512	-100	YDR502C	633	0.048449523	0.466337001	0.683322817	0.125492867	0.749581203	0.901614266	0.142027773	0.650345631	0.047817345	1	TRUE
1363	1372	YDR503C	chrIV	-	TATA-less	TAF1-enriched	146	1455889	1455931	-42	YDR503C	631	0.020132225	0.115753734	0.976763432	0.170065109	0.20185865	0.398430751	0.01822047	0.208991694	0.725606825	1	TRUE
1364	1373	ST0779	chrIV	+	TATA-less	TAF1-enriched	9	1456297	1456179	-118	ST0779	114.2	0.300066397	NA	NA	NA	NA	NA	NA	NA	NA	NA	NA
1365	1374	ST0780	chrIV	+	TATA-less	TAF1-enriched	40	1459811	1459752	-59	ST0780	282.3	0.158928499	NA	NA	NA	NA	NA	NA	NA	NA	NA	NA
1366	1375	YDR506C	chrIV	-	TATA-less	TAF1-enriched	21	1461567	1461572	-5	YDR506C	111.3	0.086275681	NA	NA	NA	NA	NA	NA	NA	NA	NA	NA
1367	1376	YDR507C	chrIV	-	TATA-less	TAF1-depleted	3928	1465898	1465905	-7	YDR507C	876.5	0.001570882	0.102713259	0.077706555	0.089316073	0.6232957	0.111724392	0.790452578	0.388239273	0.473592075	0	FALSE
1368	1377	YDR508C	chrIV	-	TATA-containing	TAF1-depleted	652	1468370	1468488	-118	YDR508C	492.4	0.002686065	0.002206982	0.059316347	0.076419242	0.732608714	0.001637794	0.154954164	0.926444896	0.129116624	2	TRUE
1369	1378	YDR510W	chrIV	+	TATA-less	TAF1-enriched	2590	1469354	1469323	-31	YDR510W	8626.3	0.026044737	0.070787283	0.550225142	0.018157883	0.974532586	0.563943813	0.225085673	0.665199916	1	1	TRUE
1370	1379	orphan	chrIV	-	TATA-less	TAF1-enriched	32	1469653	1469695	-42	orphan	2.6	0.054824188	NA	NA	NA	NA	NA	NA	NA	NA	NA	NA
1371	1380	YDR511W	chrIV	+	TATA-less	TAF1-enriched	7160	1470035	1470000	-35	YDR511W	351.9	0.533913494	NA	NA	NA	NA	NA	NA	NA	NA	NA	NA
1372	1381	YDR512C	chrIV	-	TATA-less	TAF1-depleted	239	1470765	1470773	-8	YDR512C	656.8	0.005615127	0.512500032	0.793336903	0.082236982	0.082236982	0.564394528	0.039712845	0.174310206	0.053709189	1	TRUE
1373	1382	YDR513W	chrIV	+	TATA-containing	TAF1-depleted	5593	1471198	1470995	-203	YDR513W	6524.4	0.000533582	0.495193404	0.059685203	0.109615517	0.317825155	0.038876417	0.106058308	0.253106691	0.202285856	1	TRUE
1374	1383	YDR516C	chrIV	-	TATA-containing	TAF1-depleted	225	1476441	1476528	-87	YDR516C	3477.8	0.000925872	0.01102455	0.453645043	0.045080945	0.092571358	0.007581988	0.263292864	0.499468063	0.206408754	3	TRUE
1375	1384	YDR517W	chrIV	+	TATA-less	TAF1-enriched	1093	1477179	1477166	-13	YDR517W	1497.4	0.00345022	0.767922122	0.174643954	0.082295735	0.405187454	0.005342051	0.599377287	0.353122341	0.011959389	2	TRUE
1376	1385	YDR518W	chrIV	+	TATA-less	TAF1-enriched	1430	1478640	1478583	-57	YDR518W	490.5	0.001831158	0.226065559	0.024835121	0.104103247	0.344119213	0.321344582	0.890666134	0.458593884	0.085013382	1	TRUE
1377	1386	YDR519W	chrIV	+	TATA-less	TAF1-enriched	308	1480425	1480380	-45	YDR519W	1696.3	0.001040599	0.530085427	0.023618892	0.116985804	0.084076847	0.043000979	0.004410763	0.756751021	0.387723619	3	TRUE
1378	1387	YDR520C	chrIV	-	TATA-less	TAF1-enriched	301	1483468	1483489	-21	YDR520C	43.2	0.756009385	NA	NA	NA	NA	NA	NA	NA	NA	NA	NA
1379	1388	ST0790	chrIV	+	TATA-less	TAF1-enriched	85	1483752	1483721	-31	ST0790	62.5	0.541552008	NA	NA	NA	NA	NA	NA	NA	NA	NA	NA
1380	1389	YDR524C	chrIV	-	TATA-less	TAF1-enriched	122	1489018	1489057	-39	YDR524C	676.2	0.186357095	NA	NA	NA	NA	NA	NA	NA	NA	NA	NA
1381	1390	YDR524C-B	chrIV	-	TATA-containing	TAF1-depleted	349786	1489746	1489843	-97	YDR524C-B	74438.9	0.000341277	0.006404795	0.03739987	0.285628805	0.878763302	0.055184125	0.426730569	0.132878862	0.137482903	2	TRUE
1382	1391	YDR525W-A	chrIV	+	TATA-less	TAF1-enriched	6217	1490606	1490563	-43	YDR525W-A	3090.6	0.103754486	NA	NA	NA	NA	NA	NA	NA	NA	NA	NA
1383	1392	orphan	chrIV	-	TATA-less	TAF1-depleted	72	1493096	1493114	-18	orphan	644	0.039902709	0.135901018	0.501255471	0.923447643	0.898052082	0.014698286	0.404959889	0.282314386	0.461302374	1	TRUE
1384	1393	ST4473	chrIV	-	TATA-less	TAF1-enriched	25	1493984	1493987	-3	ST4473	33.6	0.082792624	NA	NA	NA	NA	NA	NA	NA	NA	NA	NA
1385	1394	YDR528W	chrIV	+	TATA-containing	TAF1-depleted	100	1494457	1494315	-142	YDR528W	165.8	0.000836295	0.884023514	0.063945872	0.084389274	0.169372724	0.035362684	0.263330919	0.103163096	0.337679844	1	TRUE
1386	1395	YDR529C	chrIV	-	TATA-less	TAF1-enriched	1146	1496539	1496573	-34	YDR529C	3493.8	0.909138726	NA	NA	NA	NA	NA	NA	NA	NA	NA	NA
1387	1396	CUT101	chrIV	+	TATA-less	TAF1-enriched	167	1496856	1496839	-17	CUT101	11.9	0.686320613	NA	NA	NA	NA	NA	NA	NA	NA	NA	NA
1388	1397	YDR530C	chrIV	-	TATA-less	TAF1-enriched	68	1497732	1497883	-151	YDR530C	994	0.008841102	0.219312405	0.069786924	0.050663045	0.56415197	0.362853291	0.369683572	0.901249598	0.058724971	0	FALSE
1389	1398	YDR531W	chrIV	+	TATA-less	TAF1-enriched	73	1498221	1498182	-39	YDR531W	502.1	0.025713512	0.050747516	0.41425226	0.672132561	0.350157026	0.628013767	0.024840092	0.733707448	0.2882129	1	TRUE
1390	1399	YDR532C	chrIV	-	TATA-less	TAF1-depleted	26	1500546	1500588	-42	YDR532C	143.5	0.096783495	NA	NA	NA	NA	NA	NA	NA	NA	NA	NA
1391	1400	YDR533C	chrIV	-	TATA-containing	TAF1-depleted	2053	1502040	1502206	-166	YDR533C	231	0.229939445	NA	NA	NA	NA	NA	NA	NA	NA	NA	NA
1392	1401	YDR534C	chrIV	-	TATA-less	TAF1-enriched	16	1504845	1504922	-77	YDR534C	2.3	0.027635437	0.767750364	0.69375943	0.891932313	0.500013253	0.362413601	0.024981894	0.484572435	0.865148207	1	TRUE
1393	1402	ST4481	chrIV	-	TATA-containing	TAF1-enriched	27	1509739	1509791	-52	ST4481	62.4	0.663204157	NA	NA	NA	NA	NA	NA	NA	NA	NA	NA
1394	1403	YDR539W	chrIV	+	TATA-less	TAF1-depleted	585	1512235	1512054	-181	YDR539W	475.8	0.652176431	NA	NA	NA	NA	NA	NA	NA	NA	NA	NA
1395	1404	orphan	chrIV	-	TATA-less	TAF1-enriched	0	1518263	1518289	-26	orphan	0.4	NA	NA	NA	NA	NA	NA	NA	NA	NA	NA	NA
1396	1405	ST0803	chrIV	+	TATA-less	TAF1-enriched	21	1521349	1521221	-128	ST0803	112.3	0.142495231	NA	NA	NA	NA	NA	NA	NA	NA	NA	NA
1397	1406	ST4485	chrV	-	TATA-less	TAF1-enriched	327	NA	9775	NA	ST4485	113.3	0.2576918	NA	NA	NA	NA	NA	NA	NA	NA	NA	NA
1398	1407	CUT103	chrV	+	TATA-less	TAF1-enriched	208	10128	9998	-130	CUT103	37.9	0.418527347	NA	NA	NA	NA	NA	NA	NA	NA	NA	NA
1399	1408	YEL072W	chrV	+	TATA-less	TAF1-enriched	239	13675	13652	-23	YEL072W	121.1	0.041455978	0.351528915	0.003598858	0.278217928	0.264326518	0.496918283	0.202067285	0.2662852	0.701938382	1	TRUE
1400	1409	ST4490	chrV	-	TATA-less	TAF1-enriched	257	15736	15878	-142	ST4490	445.8	0.060670516	NA	NA	NA	NA	NA	NA	NA	NA	NA	NA
1401	1410	YEL071W	chrV	+	TATA-containing	TAF1-depleted	5325	16329	16326	-3	YEL071W	1956	0.011557124	0.703638615	0.235964525	0.223182073	0.352572806	0.018331151	0.480672258	0.320610367	0.007799941	2	TRUE
1402	1411	YEL068C	chrV	-	TATA-less	TAF1-enriched	94	25968	25967	1	YEL068C	1722.2	0.001069926	0.569486813	0.044145851	0.101499391	0.064990018	0.317135102	0.080210563	0.183393423	0.187473337	1	TRUE
1403	1412	orphan	chrV	-	TATA-less	TAF1-enriched	13	27207	27222	-15	orphan	6.3	0.25562375	NA	NA	NA	NA	NA	NA	NA	NA	NA	NA
1404	1413	YEL065W	chrV	+	TATA-containing	TAF1-depleted	2151	27731	27627	-104	YEL065W	456.9	0.002950095	0.17198241	1	0.228090019	0.322579042	0.010981101	0.511388532	0.739384993	0.071265166	1	TRUE
1405	1414	YEL063C	chrV	-	TATA-less	TAF1-depleted	102	33658	33697	-39	YEL063C	992.2	0.004240484	0.024281608	0.838771901	0.09303662	0.529445833	0.011139271	0.149644609	0.781422384	0.854732465	2	TRUE
1406	1415	CUT104	chrV	+	TATA-less	TAF1-enriched	0	34061	34019	-42	CUT104	4.1	0.081407978	NA	NA	NA	NA	NA	NA	NA	NA	NA	NA
1407	1416	YEL062W	chrV	+	TATA-less	TAF1-enriched	786	34430	34394	-36	YEL062W	90.8	0.491403276	NA	NA	NA	NA	NA	NA	NA	NA	NA	NA
1408	1417	YEL061C	chrV	-	TATA-less	TAF1-enriched	41	NA	39630	NA	YEL061C	928.6	0.001750425	0.17678759	0.217479106	0.079594903	0.809365834	0.074161169	0.134728146	0.933810201	0.134728146	0	FALSE
1409	1418	YEL060C	chrV	-	TATA-containing	TAF1-depleted	6096	41962	42008	-46	YEL060C	5846.8	0.000151327	0.202210115	0.006081858	0.435555365	0.009347709	0.110979273	0.000818975	0.004343476	0.216995205	4	TRUE
1410	1419	YEL058W	chrV	+	TATA-less	TAF1-enriched	785	43276	43221	-55	YEL058W	2031.8	0.009487051	0.688665248	0.019045233	0.66072762	0.066222502	0.032306488	0.066222502	0.136217939	0.066222502	2	TRUE
1411	1420	CUT105	chrV	+	TATA-less	TAF1-enriched	11	45229	45177	-52	CUT105	12.6	0.244363545	NA	NA	NA	NA	NA	NA	NA	NA	NA	NA
1412	1421	YEL056W	chrV	+	TATA-less	TAF1-enriched	788	47150	47124	-26	YEL056W	276.8	0.580109234	NA	NA	NA	NA	NA	NA	NA	NA	NA	NA
1413	1423	YEL054C	chrV	-	TATA-less	TAF1-enriched	2501	53199	53245	-46	YEL054C	47235.8	0.002178849	0.059788111	0.227862856	0.107190904	0.872018681	0.045875525	0.259461809	0.417312224	0.872018681	1	TRUE
1414	1424	YEL053C	chrV	-	TATA-less	TAF1-enriched	10	56152	56164	-12	YEL053C	409.2	0.01952042	0.333382749	0.395285365	0.699995253	0.772585084	0.835796771	0.058155518	0.950418011	0.198994019	0	FALSE
1415	1425	YEL052W	chrV	+	TATA-less	TAF1-enriched	871	56566	56536	-30	YEL052W	1394.2	0.085886281	NA	NA	NA	NA	NA	NA	NA	NA	NA	NA
1416	1426	YEL051W	chrV	+	TATA-less	TAF1-enriched	881	58382	58331	-51	YEL051W	5793.8	0.008889394	0.351491801	0.004326367	0.755821975	0.050755466	0.828853374	0.03742295	0.184205821	0.755821975	2	TRUE
1417	1427	CUT545	chrV	-	TATA-less	TAF1-depleted	42	59067	59208	-141	CUT545	36	0.02428047	0.201512647	0.513665276	0.440630611	0.661938783	0.290465177	0.087413365	0.272137166	0.044294347	1	TRUE
1418	1428	YEL050C	chrV	-	TATA-less	TAF1-enriched	132	60872	60902	-30	YEL050C	471	0.010163081	0.068244946	0.185693969	0.646173647	0.705027126	0.486019748	0.048466291	0.975115276	0.524597392	1	TRUE
1419	1429	orphan	chrV	+	TATA-less	TAF1-enriched	1235	NA	61223	NA	orphan	3603.5	0.000665629	0.023443237	0.694899111	0.217480374	0.229584537	0.013304992	0.145382283	0.185151272	0.042468012	3	TRUE
1420	1430	YEL048C	chrV	-	TATA-less	TAF1-enriched	199	65140	65188	-48	YEL048C	304.4	0.013573304	0.016798243	0.014236203	0.396218775	0.12755522	0.839885162	0.043588789	0.229515232	0.698659166	3	TRUE
1421	1431	YEL047C	chrV	-	TATA-containing	TAF1-enriched	1263	66800	66819	-19	YEL047C	1074	0.001289992	0.294042484	0.179996598	0.089089469	0.743461806	0.004038889	0.615047166	0.702990475	0.014908756	2	TRUE
1422	1432	orphan	chrV	+	TATA-containing	TAF1-enriched	0	67175	67139	-36	orphan	17.8	0.188048255	NA	NA	NA	NA	NA	NA	NA	NA	NA	NA
1423	1433	orphan	chrV	-	TATA-less	TAF1-enriched	73	67345	67431	-86	orphan	143.2	0.169577063	NA	NA	NA	NA	NA	NA	NA	NA	NA	NA
1424	1434	YEL046C	chrV	-	TATA-containing	TAF1-depleted	796746	68885	68894	-9	YEL046C	11993.8	0.002839063	0.25135731	0.055906381	0.006638621	0.717005727	0.000160199	0.717005727	0.193659707	0.015330421	3	TRUE
1425	1435	YEL044W	chrV	+	TATA-less	TAF1-enriched	331	69810	69737	-73	YEL044W	1543.2	0.090016022	NA	NA	NA	NA	NA	NA	NA	NA	NA	NA
1426	1436	YEL043W	chrV	+	TATA-less	TAF1-depleted	99	70494	70337	-157	YEL043W	481	0.846199534	NA	NA	NA	NA	NA	NA	NA	NA	NA	NA
1427	1437	YEL042W	chrV	+	TATA-less	TAF1-depleted	1280	73679	73644	-35	YEL042W	2196.1	0.008881318	0.289021164	0.163218138	0.006359285	0.412562471	0.001859047	0.744298782	0.813266036	0.018935214	3	TRUE
1428	1438	orphan	chrV	-	TATA-less	TAF1-enriched	0	77581	77688	-107	orphan	1.7	0.386941071	NA	NA	NA	NA	NA	NA	NA	NA	NA	NA
1429	1439	YEL040W	chrV	+	TATA-containing	TAF1-depleted	124	78144	78041	-103	YEL040W	8342.9	0.003310067	0.044567678	0.083606772	0.198818543	0.65290968	0.663240831	0.65290968	0.044290356	0.629914765	2	TRUE
1430	1440	YEL038W	chrV	+	TATA-less	TAF1-enriched	342	80467	80443	-24	YEL038W	2685.7	0.11657334	NA	NA	NA	NA	NA	NA	NA	NA	NA	NA
1431	1441	YEL037C	chrV	-	TATA-less	TAF1-enriched	3301	82728	82762	-34	YEL037C	449.6	0.00281037	0.759170943	0.104201078	0.003979977	0.886505117	0.004363353	0.886505117	0.853808811	0.141763005	2	TRUE
1432	1442	YEL036C	chrV	-	TATA-less	TAF1-enriched	5215	84635	84697	-62	YEL036C	509.4	0.18324345	NA	NA	NA	NA	NA	NA	NA	NA	NA	NA
1433	1443	YEL034W	chrV	+	TATA-less	TAF1-enriched	1587866	85694	85623	-71	YEL034W	60084.3	0.003996869	0.294409728	0.847759198	0.19841662	0.471599567	0.096850763	0.044005	0.023453417	0.19841662	2	TRUE
1434	1444	tS(AGA)E	chrV	+	TATA-less	-	27	86698	86594	-104	tS(AGA)E	21.1	0.756564182	NA	NA	NA	NA	NA	NA	NA	NA	NA	NA
1435	1445	YEL032W	chrV	+	TATA-less	TAF1-enriched	3759	86910	86853	-57	YEL032W	1235.7	0.004138069	0.002812	0.166209655	1	0.773835766	0.060721403	0.974528654	0.095034625	0.150773124	1	TRUE
1436	1446	YEL031W	chrV	+	TATA-less	TAF1-enriched	727	90262	90227	-35	YEL031W	3263	0.001572755	0.083818735	0.253312963	0.090829026	0.520486621	0.029026666	0.198725566	1	0.39782037	1	TRUE
1437	1447	YEL029C	chrV	-	TATA-less	TAF1-enriched	3077	97835	97861	-26	YEL029C	244.9	0.01302196	0.256674712	0.112945524	0.632719256	0.251395191	0.188105956	0.180854597	0.029260351	0.523991985	1	TRUE
1438	1448	ANT153	chrV	-	TATA-less	TAF1-enriched	48	99432	99457	-25	ANT153	127.2	0.473916139	NA	NA	NA	NA	NA	NA	NA	NA	NA	NA
1439	1449	tM(CAU)E	chrV	+	TATA-less	-	1154	100157	100123	-34	tM(CAU)E	35.5	0.086041962	NA	NA	NA	NA	NA	NA	NA	NA	NA	NA
1440	1450	orphan	chrV	-	TATA-less	TAF1-enriched	0	100157	100427	-270	orphan	47.4	0.102067691	NA	NA	NA	NA	NA	NA	NA	NA	NA	NA
1441	1451	YEL027W	chrV	+	TATA-less	TAF1-enriched	13159	100759	100706	-53	YEL027W	47693.2	0.103520106	NA	NA	NA	NA	NA	NA	NA	NA	NA	NA
1442	1452	YEL026W	chrV	+	TATA-less	TAF1-depleted	45256	101859	101853	-6	YEL026W	39784.6	0.000614448	0.00573094	0.652154457	0.016879078	0.079743512	0.001336625	0.011843874	0.067219455	0.009866373	5	TRUE
1443	1454	YEL025C	chrV	-	TATA-less	TAF1-enriched	86	106113	106152	-39	YEL025C	256.3	0.00782111	0.227862187	0.383359271	0.166162112	0.258478417	0.018133901	0.258478417	0.355172801	0.364312189	1	TRUE
1444	1455	YEL024W	chrV	+	TATA-less	TAF1-enriched	812	107222	107184	-38	YEL024W	1666.1	0.001698987	0.155296177	0.374449715	0.131539674	0.661514378	0.003159854	0.09487687	0.850555927	0.465570217	1	TRUE
1445	1456	YEL022W	chrV	+	TATA-less	TAF1-enriched	488	111382	111343	-39	YEL022W	1570.8	0.015205989	0.04057715	0.409358522	0.539697323	0.821246641	0.428518623	0.286806029	0.754641822	0.12925704	1	TRUE
1446	1457	YEL020W-A	chrV	+	TATA-containing	TAF1-enriched	1005	117210	117160	-50	YEL020W-A	5440.9	0.007709003	0.358760676	0.427608118	0.088393143	1	0.003436869	0.116969694	1	0.394232	1	TRUE
1447	1458	YEL020C-B	chrV	-	TATA-less	TAF1-enriched	1983	117404	117728	-324	YEL020C-B	1069.9	0.427980427	NA	NA	NA	NA	NA	NA	NA	NA	NA	NA
1448	1459	ST0838	chrV	+	TATA-less	TAF1-enriched	64	118091	117951	-140	ST0838	7.9	0.62490679	NA	NA	NA	NA	NA	NA	NA	NA	NA	NA
1449	1460	YEL018W	chrV	+	TATA-less	TAF1-enriched	158	121503	121451	-52	YEL018W	1212.1	0.071398886	NA	NA	NA	NA	NA	NA	NA	NA	NA	NA
1450	1461	YEL017C-A	chrV	-	TATA-less	TAF1-depleted	7310	122828	122961	-133	YEL017C-A	18082	0.002551401	0.906877938	0.660904024	0.13215122	1	0.01468286	0.542739092	0.74074862	0.200044933	1	TRUE
1451	1462	YEL017W	chrV	+	TATA-less	TAF1-enriched	1147	123698	123628	-70	YEL017W	645.4	0.134728599	NA	NA	NA	NA	NA	NA	NA	NA	NA	NA
1452	1463	YEL015W	chrV	+	TATA-less	TAF1-enriched	269	126635	126626	-9	YEL015W	1937.4	0.078649597	NA	NA	NA	NA	NA	NA	NA	NA	NA	NA
1453	1464	YEL013W	chrV	+	TATA-less	TAF1-enriched	1318	128629	128588	-41	YEL013W	1112	0.001540647	0.029424608	0.247868893	0.941783229	0.385267965	0.139662482	0.137565496	0.262338427	0.511014476	1	TRUE
1454	1465	tQ(UUG)E2	chrV	+	TATA-less	-	52	131251	131228	-23	tQ(UUG)E2	4.7	0.260594168	NA	NA	NA	NA	NA	NA	NA	NA	NA	NA
1455	1466	orphan	chrV	-	TATA-less	TAF1-enriched	69	131423	131432	-9	orphan	55.4	0.004053448	0.176374741	0.049694619	0.011083039	0.261553575	0.040790323	0.31957817	0.703687168	0.033502058	4	TRUE
1456	1467	YEL012W	chrV	+	TATA-less	TAF1-enriched	194	NA	131636	NA	YEL012W	348.1	0.176841241	NA	NA	NA	NA	NA	NA	NA	NA	NA	NA
1457	1468	ANT139	chrV	-	TATA-less	TAF1-enriched	1469	135060	135395	-335	ANT139	34.8	0.027860573	0.150430487	0.467673894	0.001543175	0.108035206	0.144707954	0.067272081	0.012934028	0.009497243	3	TRUE
1458	1469	tK(CUU)E1	chrV	+	TATA-less	-	0	NA	135505	NA	tK(CUU)E1	1.5	0.048371205	0.14193958	0.894007787	0.77745785	0.605843453	0.285643992	0.513356739	0.325562275	0.863433418	0	FALSE
1459	1470	tR(UCU)E	chrV	-	TATA-less	-	0	138508	138613	-105	tR(UCU)E	1.6	0.088950751	NA	NA	NA	NA	NA	NA	NA	NA	NA	NA
1460	1471	YEL008W	chrV	+	TATA-containing	TAF1-depleted	7	NA	140550	NA	YEL008W	44.7	0.021967418	0.38405186	0.177271103	0.61664832	0.010270104	0.600849782	0.011250661	0.082976445	0.039585566	3	TRUE
1461	1472	YEL008C-A	chrV	-	TATA-less	TAF1-enriched	3604	140708	140840	-132	YEL008C-A	174.3	0.01025369	0.10087781	0.642219133	0.087316384	0.403727331	0.024556237	0.42187415	0.68887333	0.768580574	1	TRUE
1462	1473	YEL007W	chrV	+	TATA-less	TAF1-enriched	32631	NA	141640	NA	YEL007W	1618.1	0.041787922	0.449011365	0.976770595	0.015343294	0.009775866	0.029074129	0.278143854	0.901682193	0.097187411	3	TRUE
1463	1474	YEL006W	chrV	+	TATA-containing	TAF1-depleted	400	144312	144270	-42	YEL006W	561.6	0.001681831	0.084563844	0.087255454	0.93564513	0.340698843	0.162465977	0.213696305	0.545447319	0.180128646	0	FALSE
1464	1475	YEL003W	chrV	+	TATA-less	TAF1-enriched	122	148225	148148	-77	YEL003W	1405.8	0.003272455	0.054950766	0.010496758	0.968237329	0.056994345	0.289613828	0.010102079	0.057166975	0.980939174	2	TRUE
1465	1477	YEL002C	chrV	-	TATA-less	TAF1-enriched	1159	150010	150064	-54	YEL002C	7154.2	0.00748752	0.661790323	0.280576438	0.804456439	0.157472424	0.038224865	0.792121329	0.39211852	0.410725731	1	TRUE
1466	1478	CUT106	chrV	+	TATA-less	TAF1-enriched	28	150318	150270	-48	CUT106	26.9	0.54513205	NA	NA	NA	NA	NA	NA	NA	NA	NA	NA
1467	1479	YEL001C	chrV	-	TATA-less	TAF1-enriched	2353	150942	151013	-71	YEL001C	10137.7	0.000813627	0.193580207	0.661224878	0.026676051	0.060081991	0.034221971	0.118722345	0.391274905	0.16147063	2	TRUE
1468	1481	ST4529	chrV	-	TATA-less	TAF1-enriched	32	151845	151851	-6	ST4529	64.7	0.007163001	0.334963368	0.203748446	0.677355381	0.096052774	0.482412911	0.073081472	0.142421529	0.353321197	0	FALSE
1469	1482	CUT547	chrV	-	TATA-less	TAF1-enriched	6	152662	152738	-76	CUT547	4.5	0.109544861	NA	NA	NA	NA	NA	NA	NA	NA	NA	NA
1470	1483	YER001W	chrV	+	TATA-containing	TAF1-depleted	328	153466	153474	8	YER001W	540	0.008809405	0.861668138	0.023496476	0.103005432	0.217656802	0.734731137	0.087267893	0.229620225	0.223651418	1	TRUE
1471	1484	ST4532	chrV	-	TATA-containing	TAF1-enriched	0	NA	156467	NA	ST4532	112.8	0.273091605	NA	NA	NA	NA	NA	NA	NA	NA	NA	NA
1472	1485	YER002W	chrV	+	TATA-less	TAF1-enriched	490	156805	156754	-51	YER002W	639.2	0.000291808	0.011495289	1	0.005631736	1	0.000963138	1	1	0.336411427	3	TRUE
1473	1486	YER003C	chrV	-	TATA-less	TAF1-enriched	1123	159114	159152	-38	YER003C	5175.6	0.277698103	NA	NA	NA	NA	NA	NA	NA	NA	NA	NA
1474	1487	YER004W	chrV	+	TATA-less	TAF1-enriched	8959	159592	159572	-20	YER004W	2914.7	0.004153074	0.05916948	0.539214228	0.020716844	0.384592757	0.002824621	0.565849314	0.280090012	0.286276664	2	TRUE
1475	1488	YER005W	chrV	+	TATA-less	TAF1-depleted	963	160548	160506	-42	YER005W	106.7	0.234405324	NA	NA	NA	NA	NA	NA	NA	NA	NA	NA
1476	1489	ST4534	chrV	-	TATA-less	TAF1-enriched	465	162413	162446	-33	ST4534	41.8	0.271286392	NA	NA	NA	NA	NA	NA	NA	NA	NA	NA
1477	1490	YER006W	chrV	+	TATA-less	TAF1-enriched	4224	162736	162696	-40	YER006W	3788.9	0.007337035	0.439217309	0.0015326	0.328220513	0.133835541	0.643500052	0.819544369	0.50083328	0.043322305	2	TRUE
1478	1491	YER007C-A	chrV	-	TATA-less	TAF1-enriched	2743	166855	166910	-55	YER007C-A	1311.8	0.096610486	NA	NA	NA	NA	NA	NA	NA	NA	NA	NA
1479	1492	orphan	chrV	-	TATA-containing	TAF1-depleted	47382	167561	167586	-25	orphan	45213.2	0.000657511	0.748462474	0.058111924	0.182452192	0.139690265	0.059279449	0.046823999	0.190553575	0.182452192	1	TRUE
1480	1493	orphan	chrV	+	TATA-less	TAF1-enriched	15	167868	167847	-21	orphan	10.8	0.093496284	NA	NA	NA	NA	NA	NA	NA	NA	NA	NA
1481	1494	YER008C	chrV	-	TATA-less	TAF1-enriched	126	171832	171875	-43	YER008C	128.8	0.018666924	0.329970874	0.000668129	0.439823658	0.768252456	0.404967932	0.708181298	0.051997193	0.335235057	1	TRUE
1482	1495	YER010C	chrV	-	TATA-less	TAF1-enriched	581	173147	173306	-159	YER010C	1365.7	0.003335733	0.35363305	0.331182307	0.255512819	0.042956806	0.200354294	0.370715961	0.166158904	0.890957719	1	TRUE
1483	1496	YER011W	chrV	+	TATA-containing	TAF1-depleted	368	175326	175194	-132	YER011W	381	0.385591847	NA	NA	NA	NA	NA	NA	NA	NA	NA	NA
1484	1497	tE(UUC)E1	chrV	+	TATA-less	-	743	177119	177087	-32	tE(UUC)E1	70.1	0.028539372	0.278705956	1	0.010860949	0.751157133	0.079015817	0.751157133	0.682251744	0.01915239	2	TRUE
1485	1498	ST4539	chrV	-	TATA-less	TAF1-enriched	123	177542	177580	-38	ST4539	371.8	0.012359631	0.522427734	0.282059789	0.974593303	0.251577404	0.058582363	0.035556334	0.073691226	0.444658134	1	TRUE
1486	1499	YER012W	chrV	+	TATA-less	TAF1-enriched	358	NA	177823	NA	YER012W	5527.3	0.004433933	0.749210159	0.190945926	0.904971156	0.087049675	0.014885206	0.075924016	0.229298602	0.385655208	1	TRUE
1487	1500	CUT550	chrV	-	TATA-less	TAF1-enriched	130	178394	178485	-91	CUT550	111.4	0.048768224	0.681292341	0.297681359	0.045452085	0.658586417	0.474207128	0.038949714	0.167758382	0.278108	2	TRUE
1488	1501	YER013W	chrV	+	TATA-less	TAF1-enriched	88	178833	178823	-10	YER013W	119.4	0.015098521	0.123664687	0.245259343	0.638811767	0.394650685	0.829241608	0.86732235	0.01118897	0.708480516	1	TRUE
1489	1502	YER015W	chrV	+	TATA-less	TAF1-enriched	99	184511	184468	-43	YER015W	168.4	0.039777483	0.020672927	0.976633352	0.032868406	0.531532965	0.520844269	0.282435213	0.835923063	0.961614008	2	TRUE
1490	1503	ST4541	chrV	-	TATA-less	TAF1-enriched	45	188031	188074	-43	ST4541	66.2	0.01164659	0.280464847	0.17038374	0.133142469	0.773665659	0.116979561	0.090351464	0.71043751	0.044105819	1	TRUE
1491	1504	YER016W	chrV	+	TATA-less	TAF1-enriched	223	188309	188252	-57	YER016W	943.3	0.021596352	0.018954276	0.716367317	0.584211736	0.226060996	0.403751425	0.226060996	0.118091026	0.933918634	1	TRUE
1492	1505	YER017C	chrV	-	TATA-less	TAF1-depleted	937	191814	191869	-55	YER017C	285.2	0.020458331	0.010495759	0.336303797	0.581676114	0.284858813	0.078879347	0.127713232	0.900114963	0.127713232	1	TRUE
1493	1506	YER019W	chrV	+	TATA-less	TAF1-depleted	77	192337	192372	35	YER019W	331.3	0.147854695	NA	NA	NA	NA	NA	NA	NA	NA	NA	NA
1494	1507	YER018C	chrV	-	TATA-less	TAF1-enriched	949	192569	192679	-110	YER018C	148.2	0.127903058	NA	NA	NA	NA	NA	NA	NA	NA	NA	NA
1495	1508	orphan	chrV	+	TATA-less	TAF1-enriched	315	192887	192851	-36	orphan	565	0.056757902	NA	NA	NA	NA	NA	NA	NA	NA	NA	NA
1496	1509	YER019C-A	chrV	-	TATA-less	TAF1-enriched	2382	194549	194591	-42	YER019C-A	3026.9	0.001777423	0.344611518	0.15418348	0.028520474	0.52925598	0.006851652	0.980939174	0.490921435	0.024211114	3	TRUE
1497	1510	YER020W	chrV	+	TATA-containing	TAF1-depleted	1641	195286	195109	-177	YER020W	802.9	0.005160687	0.053894477	0.976521419	0.226673463	0.32546103	0.754922485	0.160793464	0.104545018	0.021160565	1	TRUE
1498	1511	YER021W	chrV	+	TATA-less	TAF1-enriched	1597	196981	196891	-90	YER021W	2982.7	0.082659579	NA	NA	NA	NA	NA	NA	NA	NA	NA	NA
1499	1512	YER022W	chrV	+	TATA-less	TAF1-enriched	69	198831	198793	-38	YER022W	110.9	0.050416342	NA	NA	NA	NA	NA	NA	NA	NA	NA	NA
1500	1513	YER023W	chrV	+	TATA-less	TAF1-enriched	3373	201088	201043	-45	YER023W	996.6	0.127419697	NA	NA	NA	NA	NA	NA	NA	NA	NA	NA
1501	1514	orphan	chrV	+	TATA-less	TAF1-enriched	159	202889	202840	-49	orphan	198.7	0.045837357	0.38126786	0.179424426	0.538262695	0.287765346	0.687370857	0.143556483	0.489347824	0.358008229	0	FALSE
1502	1516	ANT142	chrV	-	TATA-less	TAF1-enriched	97	204568	204597	-29	ANT142	30.5	0.016432017	0.805151604	0.601396804	0.514573889	0.187048625	0.727189892	0.286864193	0.010938111	0.644811967	1	TRUE
1503	1517	YER025W	chrV	+	TATA-less	TAF1-enriched	11937	205246	205215	-31	YER025W	10356.2	0.012596559	0.056645903	0.379638719	0.113586078	0.289012912	0.070130858	0.304107337	0.043212165	0.613083744	1	TRUE
1504	1518	YER026C	chrV	-	TATA-containing	TAF1-depleted	1228	208523	208494	29	YER026C	7198.3	0.013640477	0.082588494	0.267595518	0.022782992	0.904605969	0.702727947	0.148140987	0.642534896	0.917275984	1	TRUE
1505	1519	YER027C	chrV	-	TATA-less	TAF1-enriched	265	210271	210311	-40	YER027C	904	0.051827234	NA	NA	NA	NA	NA	NA	NA	NA	NA	NA
1506	1520	YER028C	chrV	-	TATA-containing	TAF1-depleted	191	211772	211944	-172	YER028C	27.9	0.439981364	NA	NA	NA	NA	NA	NA	NA	NA	NA	NA
1507	1521	YER029C	chrV	-	TATA-less	TAF1-enriched	185	213193	213225	-32	YER029C	337.6	0.000937035	0.248471052	0.196794776	0.006370863	0.527314523	0.006812883	0.594515618	1	0.08363255	2	TRUE
1508	1522	YER031C	chrV	-	TATA-less	TAF1-enriched	1341	214733	214783	-50	YER031C	1632.8	0.002301498	0.662279723	0.041524945	0.326675024	0.234768905	0.024162031	0.054631552	0.812828643	0.448717988	2	TRUE
1509	1523	YER032W	chrV	+	TATA-less	TAF1-enriched	281	215031	215004	-27	YER032W	203.6	0.01717657	0.29310861	0.007215664	0.164042961	0.532744769	0.040918935	0.532744769	0.444837339	0.113296826	2	TRUE
1510	1524	YER033C	chrV	-	TATA-less	TAF1-enriched	207	221474	221547	-73	YER033C	87	0.738195724	NA	NA	NA	NA	NA	NA	NA	NA	NA	NA
1511	1525	YER035W	chrV	+	TATA-less	TAF1-depleted	3100	222654	222648	-6	YER035W	2207	0.219677469	NA	NA	NA	NA	NA	NA	NA	NA	NA	NA
1512	1526	CUT551	chrV	-	TATA-containing	TAF1-enriched	131	222998	223126	-128	CUT551	59.7	0.024104468	0.165325249	0.188724383	0.383270643	0.309692715	0.489011149	0.06940684	0.627427824	0.088422761	0	FALSE
1513	1527	YER036C	chrV	-	TATA-containing	TAF1-enriched	7362	225229	225245	-16	YER036C	4954.6	0.017958882	0.012295394	0.336236058	0.109980729	1	0.021570658	0.403456271	1	1	2	TRUE
1514	1528	YER039C	chrV	-	TATA-less	TAF1-enriched	94	229475	229498	-23	YER039C	189.5	0.018159886	0.052755091	0.041149105	0.054302706	0.383348535	0.055993921	0.002910033	0.242853547	0.856424235	2	TRUE
1515	1529	YER040W	chrV	+	TATA-less	TAF1-enriched	6555	229753	229713	-40	YER040W	202	0.016764369	0.09387827	0.217046164	0.535404781	0.865773028	0.079066925	0.263217893	0.293939321	0.256410575	0	FALSE
1516	1530	orphan	chrV	+	TATA-less	TAF1-enriched	15	234648	234593	-55	orphan	4.5	0.885988967	NA	NA	NA	NA	NA	NA	NA	NA	NA	NA
1517	1531	YER042W	chrV	+	TATA-containing	TAF1-enriched	121	234922	234909	-13	YER042W	941.3	0.001889989	0.066779713	0.066779713	0.261186764	0.411772209	0.253486572	0.311524487	0.289317044	0.402752014	0	FALSE
1518	1532	YER043C	chrV	-	TATA-less	TAF1-enriched	51788	237139	237148	-9	YER043C	29049	0.035030701	0.036683902	0.407062934	0.820384029	0.820384029	0.209638254	0.241364302	0.698814983	0.820384029	1	TRUE
1519	1533	YER044C	chrV	-	TATA-containing	TAF1-depleted	1469	237930	238070	-140	YER044C	2940.2	0.069026015	NA	NA	NA	NA	NA	NA	NA	NA	NA	NA
1520	1534	CUT109	chrV	+	TATA-less	TAF1-enriched	240	238640	238612	-28	CUT109	16.2	0.343366905	NA	NA	NA	NA	NA	NA	NA	NA	NA	NA
1521	1535	orphan	chrV	-	TATA-less	TAF1-enriched	844	241578	241652	-74	orphan	595.5	0.014108394	0.536487436	0.331372814	0.032664125	0.002373419	0.200531626	0.013946788	0.553054985	0.085977131	3	TRUE
1522	1536	orphan	chrV	+	TATA-less	TAF1-enriched	77	242550	242506	-44	orphan	146.2	0.178159654	NA	NA	NA	NA	NA	NA	NA	NA	NA	NA
1523	1537	ST4562	chrV	-	TATA-less	TAF1-enriched	168	242778	242831	-53	ST4562	10.2	0.585430758	NA	NA	NA	NA	NA	NA	NA	NA	NA	NA
1524	1538	YER047C	chrV	-	TATA-less	TAF1-enriched	33	246667	246694	-27	YER047C	43	0.120204783	NA	NA	NA	NA	NA	NA	NA	NA	NA	NA
1525	1539	YER048C	chrV	-	TATA-less	TAF1-enriched	127	248223	248231	-8	YER048C	2555.2	0.002142506	0.37805748	0.002807438	0.0117216	0.042414881	0.004059196	0.533993824	0.087000404	0.13214332	4	TRUE
1526	1540	orphan	chrV	+	TATA-less	TAF1-enriched	0	249939	249875	-64	orphan	1.1	0.407392752	NA	NA	NA	NA	NA	NA	NA	NA	NA	NA
1527	1541	YER048W-A	chrV	+	TATA-less	TAF1-depleted	937	250687	250637	-50	YER048W-A	2760.8	0.000314194	0.020513465	0.2590211	0.105499562	0.174319559	0.005048685	0.174319559	0.941399671	0.069680197	2	TRUE
1528	1542	orphan	chrV	-	TATA-less	TAF1-enriched	12	251384	251402	-18	orphan	1.3	0.094469265	NA	NA	NA	NA	NA	NA	NA	NA	NA	NA
1529	1543	YER049W	chrV	+	TATA-less	TAF1-enriched	1060	251660	251642	-18	YER049W	1462	0.007675887	0.017080041	0.377060162	0.232706224	0.287148139	0.182698444	0.287148139	0.617297148	0.383824247	1	TRUE
1530	1544	YER050C	chrV	-	TATA-less	TAF1-enriched	198	254408	254446	-38	YER050C	1799.5	0.000180303	0.358736728	0.088694573	0.059969385	0.314717745	0.015166251	0.12744035	0.304993809	0.194543729	1	TRUE
1531	1545	YER051W	chrV	+	TATA-less	TAF1-enriched	100	254692	254643	-49	YER051W	100.2	0.015782024	0.173639077	0.160171867	0.2551694	0.987213235	0.468970488	0.282922739	0.238263457	0.136101677	0	FALSE
1532	1546	YER052C	chrV	-	TATA-containing	TAF1-depleted	7028	258027	258053	-26	YER052C	1999.9	0.012129754	0.058752578	0.352121916	0.300567266	0.454133295	0.10430897	0.138564583	0.118139537	0.034156895	1	TRUE
1533	1547	YER053C	chrV	-	TATA-less	TAF1-depleted	177	259582	259737	-155	YER053C	3607.3	0.001437711	0.285126627	0.014905931	0.161943202	0.769733818	0.013235464	0.416149432	0.475339447	0.054989081	2	TRUE
1534	1548	CUT110	chrV	+	TATA-less	TAF1-enriched	578	262012	261985	-27	CUT110	80.7	0.144402545	NA	NA	NA	NA	NA	NA	NA	NA	NA	NA
1535	1549	YER055C	chrV	-	TATA-containing	TAF1-depleted	3123	265640	265811	-171	YER055C	3884.9	0.006870658	0.003827429	0.209064907	0.317298776	0.016037616	0.296879381	0.008486792	0.796248584	0.166348181	3	TRUE
1536	1550	YER056C	chrV	-	TATA-containing	TAF1-depleted	2935	268046	268200	-154	YER056C	1500.9	0.006540639	0.088469697	0.322133345	0.199158138	0.002378185	0.002556399	0.000989059	0.125022017	0.199158138	3	TRUE
1537	1551	ST0889	chrV	+	TATA-less	TAF1-enriched	32	269040	268933	-107	ST0889	485	0.08610887	NA	NA	NA	NA	NA	NA	NA	NA	NA	NA
1538	1552	CUT554	chrV	-	TATA-containing	TAF1-enriched	259	269257	269288	-31	CUT554	552.4	0.003969454	0.16829805	0.228717637	0.192688519	0.162117886	0.485611913	0.001847625	0.983637355	0.445739747	1	TRUE
1539	1553	orphan	chrV	+	TATA-less	TAF1-enriched	4	270152	270059	-93	orphan	2.5	0.206495606	NA	NA	NA	NA	NA	NA	NA	NA	NA	NA
1540	1554	YER056C-A	chrV	-	TATA-less	TAF1-enriched	97206	NA	270203	NA	YER056C-A	38654.2	0.229831612	NA	NA	NA	NA	NA	NA	NA	NA	NA	NA
1541	1555	ST0890	chrV	+	TATA-less	TAF1-enriched	117	270695	270693	-2	ST0890	32.4	0.153190843	NA	NA	NA	NA	NA	NA	NA	NA	NA	NA
1542	1556	YER057C	chrV	-	TATA-less	TAF1-depleted	30503	271147	271169	-22	YER057C	4310.7	0.000243158	0.181134063	0.14535393	0.134273367	0.152042558	0.053209873	0.078766414	0.265408245	0.134273367	0	FALSE
1543	1557	YER058W	chrV	+	TATA-less	TAF1-enriched	112	271763	271736	-27	YER058W	217	0.462864074	NA	NA	NA	NA	NA	NA	NA	NA	NA	NA
1544	1558	CUT555	chrV	-	TATA-less	TAF1-enriched	94	272062	272140	-78	CUT555	3.7	0.103261425	NA	NA	NA	NA	NA	NA	NA	NA	NA	NA
1545	1559	YER059W	chrV	+	TATA-less	TAF1-enriched	655	272506	272463	-43	YER059W	418	0.300986528	NA	NA	NA	NA	NA	NA	NA	NA	NA	NA
1546	1560	YER060W	chrV	+	TATA-containing	TAF1-enriched	130	274473	274471	-2	YER060W	382.1	0.012038438	0.171901441	0.383213175	0.235597429	0.829826445	0.629098434	0.014534796	0.530746152	0.720188454	1	TRUE
1547	1561	YER061C	chrV	-	TATA-less	TAF1-enriched	88	279423	279597	-174	YER061C	669.3	0.00493318	0.515889629	1	0.097982699	0.581242277	0.007709385	0.581242277	1	0.097982699	1	TRUE
1548	1562	YER062C	chrV	-	TATA-containing	TAF1-enriched	1065	280836	280823	13	YER062C	2298	0.019528034	0.375016736	0.166573297	0.210645472	0.373771203	0.110758466	0.32302667	0.250864888	0.373771203	0	FALSE
1549	1563	orphan	chrV	+	TATA-less	TAF1-enriched	13	281351	281251	-100	orphan	16.9	0.030292659	0.468321624	0.086988538	0.006432157	0.087631564	0.959102187	0.993661428	0.010045193	0.708863876	2	TRUE
1550	1564	orphan	chrV	-	TATA-less	TAF1-enriched	172	281351	281354	-3	orphan	16.6	0.729624635	NA	NA	NA	NA	NA	NA	NA	NA	NA	NA
1551	1565	YER063W	chrV	+	TATA-less	TAF1-enriched	1488	281828	281647	-181	YER063W	1749	0.000782356	0.120516592	0.55794933	0.031550056	0.520996222	0.002326735	0.319830483	0.395720969	0.319830483	2	TRUE
1552	1566	YER064C	chrV	-	TATA-containing	TAF1-depleted	311	284221	284312	-91	YER064C	698.4	0.004830279	0.651728983	0.484625517	0.020303765	0.182924945	0.013093427	0.056651055	0.205388601	0.3847046	2	TRUE
1553	1567	YER065C	chrV	-	TATA-less	TAF1-depleted	410	287143	287245	-102	YER065C	97.1	0.55804071	NA	NA	NA	NA	NA	NA	NA	NA	NA	NA
1554	1568	tS(UGA)E	chrV	-	TATA-containing	-	90	288493	288531	-38	tS(UGA)E	53.1	0.299469094	NA	NA	NA	NA	NA	NA	NA	NA	NA	NA
1555	1569	orphan	chrV	+	TATA-less	TAF1-enriched	94	289382	289350	-32	orphan	47.4	0.156254475	NA	NA	NA	NA	NA	NA	NA	NA	NA	NA
1556	1570	YER068W	chrV	+	TATA-less	TAF1-enriched	402	292972	292950	-22	YER068W	439.1	0.013042412	0.058849729	0.154373449	0.229370003	0.073287727	0.245541797	0.124462426	0.371291503	0.099403588	0	FALSE
1557	1571	YER069W	chrV	+	TATA-less	TAF1-depleted	686	295468	295400	-68	YER069W	161.8	0.016134329	0.042104015	0.22620782	0.592390285	0.230830924	0.938785595	0.272971614	0.750366534	0.592390285	1	TRUE
1558	1572	YER070W	chrV	+	TATA-containing	TAF1-depleted	3031	298915	298882	-33	YER070W	1648	0.006217143	0.08305111	0.239960609	0.540908549	0.176502199	0.360715885	0.27388692	0.157788586	0.421093331	0	FALSE
1559	1573	CUT559	chrV	-	TATA-less	TAF1-enriched	8	301574	301664	-90	CUT559	19.8	0.283679274	NA	NA	NA	NA	NA	NA	NA	NA	NA	NA
1560	1574	YER071C	chrV	-	TATA-less	TAF1-enriched	130	302145	302291	-146	YER071C	466.7	0.003201884	0.456633814	0.397232681	0.457179569	0.058129043	0.687302045	0.020863617	0.029426035	0.743078637	2	TRUE
1561	1575	orphan	chrV	-	TATA-less	TAF1-depleted	46	302295	302472	-177	orphan	342.4	0.002946042	0.861383771	0.122972924	0.980924507	0.067982991	0.797001866	0.016441878	0.013149694	0.439471739	2	TRUE
1562	1576	YER072W	chrV	+	TATA-less	TAF1-depleted	50416	302790	302771	-19	YER072W	19075.9	0.000506449	0.116090792	0.268814442	0.917485653	0.359418238	0.03319692	0.448997517	0.171201346	0.917485653	1	TRUE
1563	1577	CUT561	chrV	-	TATA-containing	TAF1-enriched	49	303096	303333	-237	CUT561	300.2	0.004229276	0.548895419	0.010079109	0.194548741	0.194548741	0.012357908	0.023935816	0.159740311	0.312991816	3	TRUE
1564	1578	orphan	chrV	-	TATA-less	TAF1-enriched	15	303567	303652	-85	orphan	18.5	0.010559457	0.600894663	0.021682122	0.786695866	0.987299919	0.08431335	0.398866823	0.225343029	0.644355254	1	TRUE
1565	1579	YER073W	chrV	+	TATA-containing	TAF1-depleted	1126	304025	303952	-73	YER073W	593.6	0.259843668	NA	NA	NA	NA	NA	NA	NA	NA	NA	NA
1566	1580	orphan	chrV	+	TATA-containing	TAF1-enriched	15	306022	305950	-72	orphan	3.2	0.954537469	NA	NA	NA	NA	NA	NA	NA	NA	NA	NA
1567	1581	YER074W	chrV	+	TATA-less	TAF1-enriched	1051	306325	306285	-40	YER074W	1186	0.003428162	0.298887975	0.074258651	0.993605915	0.226241911	0.569340301	0.042610029	0.876672964	0.340259766	1	TRUE
1568	1582	YER074W-A	chrV	+	TATA-less	TAF1-enriched	545	307666	307615	-51	YER074W-A	2209.2	0.004146497	0.011458565	0.032217749	0.133898111	0.4341924	0.005496158	0.794339874	0.613697079	0.4341924	3	TRUE
1569	1583	YER075C	chrV	-	TATA-less	TAF1-depleted	7332	311174	311343	-169	YER075C	111.9	0.063468289	NA	NA	NA	NA	NA	NA	NA	NA	NA	NA
1570	1584	YER076C	chrV	-	TATA-less	TAF1-enriched	57	313417	313658	-241	YER076C	97.2	0.994780372	NA	NA	NA	NA	NA	NA	NA	NA	NA	NA
1571	1585	orphan	chrV	-	TATA-less	TAF1-enriched	6	313680	313976	-296	orphan	85.8	0.048645027	0.158378807	0.713373299	0.923065168	0.747519824	0.030691767	0.233625265	0.90078026	0.897543952	1	TRUE
1572	1586	YER077C	chrV	-	TATA-less	TAF1-enriched	136	316502	316547	-45	YER077C	98.9	0.116253933	NA	NA	NA	NA	NA	NA	NA	NA	NA	NA
1573	1587	CUT111	chrV	+	TATA-less	TAF1-enriched	10	316874	316760	-114	CUT111	17.2	0.929333331	NA	NA	NA	NA	NA	NA	NA	NA	NA	NA
1574	1588	YER078W-A	chrV	+	TATA-less	TAF1-enriched	28	318676	318575	-101	YER078W-A	4	0.409643137	NA	NA	NA	NA	NA	NA	NA	NA	NA	NA
1575	1589	YER079W	chrV	+	TATA-less	TAF1-depleted	177	318955	318843	-112	YER079W	248.9	0.004423225	0.031339814	0.268961817	0.095896881	0.708074211	0.049475062	0.222869299	0.465237523	0.879683167	2	TRUE
1576	1590	YER080W	chrV	+	TATA-less	TAF1-enriched	1174	319966	319932	-34	YER080W	2195.2	0.004980726	0.243506305	0.067160701	0.517711562	0.348258991	0.83462104	0.065241543	0.112576588	0.674142111	0	FALSE
1577	1591	CUT563	chrV	-	TATA-less	TAF1-enriched	19	321764	321840	-76	CUT563	52.2	0.324027218	NA	NA	NA	NA	NA	NA	NA	NA	NA	NA
1578	1592	orphan	chrV	+	TATA-containing	TAF1-depleted	180	322211	322213	2	orphan	2597.8	0.000140597	0.408134882	0.026714694	0.437345597	0.120335541	0.094690761	0.032689254	0.044921599	0.195502333	3	TRUE
1579	1593	YER081W	chrV	+	TATA-containing	TAF1-depleted	401	322778	322659	-119	YER081W	656.1	0.00058561	0.482013253	0.15968363	0.018341366	0.413181107	0.010838457	0.182940112	0.693896643	0.018341366	3	TRUE
1580	1594	YER082C	chrV	-	TATA-containing	TAF1-enriched	364	325933	325976	-43	YER082C	1097.4	0.011207899	0.814138228	0.048966209	0.439766642	0.071434748	0.851649956	0.039376282	0.647567259	0.138661904	2	TRUE
1581	1595	CUT112	chrV	+	TATA-less	TAF1-enriched	0	326249	326223	-26	CUT112	15.1	0.088640824	NA	NA	NA	NA	NA	NA	NA	NA	NA	NA
1582	1596	YER083C	chrV	-	TATA-less	TAF1-enriched	5123	327010	327052	-42	YER083C	4560	0.00109849	0.018322026	0.088737398	0.818884348	0.743581291	0.007326575	0.150064476	0.882495836	0.432409725	2	TRUE
1583	1597	YER086W	chrV	+	TATA-less	TAF1-enriched	358	328441	328413	-28	YER086W	1666.6	0.001697912	0.087056019	0.307407218	0.041461862	0.742267674	0.050830122	0.742267674	0.372636109	0.008518045	2	TRUE
1584	1598	YER087W	chrV	+	TATA-less	TAF1-enriched	218	330538	330520	-18	YER087W	99.5	0.559702117	NA	NA	NA	NA	NA	NA	NA	NA	NA	NA
1585	1599	YER087C-B	chrV	-	TATA-less	TAF1-enriched	36617	332831	332873	-42	YER087C-B	670.7	0.07209838	NA	NA	NA	NA	NA	NA	NA	NA	NA	NA
1586	1600	YER088C	chrV	-	TATA-less	TAF1-enriched	36973	335165	335246	-81	YER088C	323	0.009642413	0.360397539	0.522970138	0.049524601	0.594201261	0.007377825	0.768597805	0.558458618	0.045949841	3	TRUE
1587	1601	YER089C	chrV	-	TATA-less	TAF1-enriched	2953	337601	337657	-56	YER089C	10818.4	0.000338314	0.114403867	0.061337166	0.009484549	0.149541355	0.007200651	0.353022139	0.709815267	0.149541355	2	TRUE
1588	1602	YER090W	chrV	+	TATA-less	TAF1-enriched	19803	337918	337878	-40	YER090W	2245.5	0.001148948	0.012346879	0.325628662	0.076701598	0.10452094	0.022297695	0.079458171	0.576741545	0.467834114	2	TRUE
1589	1603	YER091C	chrV	-	TATA-containing	TAF1-depleted	2036	342149	342237	-88	YER091C	5729.6	0.001575094	0.000912397	0.312836386	0.805070621	0.805070621	0.100176113	0.805070621	0.750026263	0.037259519	2	TRUE
1590	1604	YER092W	chrV	+	TATA-less	TAF1-enriched	843	342903	342851	-52	YER092W	1372.6	0.001361793	0.95286254	0.052875928	0.047355707	0.667924523	0.010461871	0.288983544	0.59407864	0.084692108	2	TRUE
1591	1605	YER093C	chrV	-	TATA-less	TAF1-enriched	859	347632	347654	-22	YER093C	408.8	0.003378505	0.163550459	0.060491623	0.07586176	0.417193923	0.194883979	0.546874748	0.554455339	0.828300353	0	FALSE
1592	1606	orphan	chrV	-	TATA-less	TAF1-enriched	279	348391	348413	-22	orphan	946.3	0.001043091	0.026702647	0.487496795	0.145282936	0.538605487	0.008481383	0.364828676	0.427275572	0.154437061	2	TRUE
1593	1607	YER094C	chrV	-	TATA-less	TAF1-enriched	2538	349397	349436	-39	YER094C	4314.1	0.001346009	0.064892452	0.020036314	0.191666209	0.425951988	0.399338241	0.278920599	0.665974048	0.091447327	1	TRUE
1594	1608	orphan	chrV	+	TATA-less	TAF1-enriched	18	353757	353731	-26	orphan	17.2	0.411854926	NA	NA	NA	NA	NA	NA	NA	NA	NA	NA
1595	1609	tE(UUC)E2	chrV	+	TATA-less	-	3871	354937	354923	-14	tE(UUC)E2	285.8	0.85617137	NA	NA	NA	NA	NA	NA	NA	NA	NA	NA
1596	1610	YER100W	chrV	+	TATA-less	TAF1-enriched	625	359550	359285	-265	YER100W	88.4	0.000958825	0.013266078	0.321872082	0.182688647	0.210303815	0.183901389	0.210303815	0.703099657	0.904730605	1	TRUE
1597	1611	YER101C	chrV	-	TATA-less	TAF1-enriched	231	361785	361830	-45	YER101C	253.4	0.014225068	0.016279271	0.827103759	0.59309432	0.216384289	0.427885373	0.144423865	0.279647327	0.112485222	1	TRUE
1598	1612	orphan	chrV	-	TATA-less	TAF1-enriched	16	362014	362158	-144	orphan	20.8	0.38312001	NA	NA	NA	NA	NA	NA	NA	NA	NA	NA
1599	1613	YER102W	chrV	+	TATA-less	TAF1-enriched	233	362761	362700	-61	YER102W	1165.7	0.001043735	0.2204591	0.088478777	0.523219206	0.11233317	0.156815549	0.034720695	0.183079104	0.63500012	1	TRUE
1600	1614	YER103W	chrV	+	TATA-less	TAF1-depleted	82	364445	364409	-36	YER103W	1653	0.008520476	0.02845149	0.200787503	0.306368376	0.354330276	0.794905978	0.102052327	0.04052387	0.681248807	2	TRUE
1601	1615	YER104W	chrV	+	TATA-less	TAF1-enriched	221	366817	366778	-39	YER104W	447.5	0.134340034	NA	NA	NA	NA	NA	NA	NA	NA	NA	NA
1602	1616	YER105C	chrV	-	TATA-less	TAF1-enriched	472	371997	372034	-37	YER105C	1598.5	0.000284258	0.042367949	0.471350919	0.009814971	1	0.000856959	0.114551722	1	1	3	TRUE
1603	1617	YER109C	chrV	-	TATA-less	TAF1-enriched	79	377749	377782	-33	YER109C	280.2	0.000728198	0.296011016	0.771598242	0.464547163	0.203385564	0.008605036	0.279621398	0.21053305	0.04183639	2	TRUE
1604	1618	YER110C	chrV	-	TATA-less	TAF1-enriched	13594	382187	382215	-28	YER110C	4506.4	0.000984361	0.06586161	0.028137039	0.864523785	0.004813348	0.592694591	0.004813348	0.592694591	0.185395393	3	TRUE
1605	1619	YER111C	chrV	-	TATA-less	TAF1-enriched	89	386012	386130	-118	YER111C	190.4	0.285858004	NA	NA	NA	NA	NA	NA	NA	NA	NA	NA
1606	1620	YER112W	chrV	+	TATA-less	TAF1-enriched	219	387369	387191	-178	YER112W	2806.6	0.0006594	0.025115634	0.003854482	1	1	0.428462679	0.322532899	1	1	2	TRUE
1607	1621	YER113C	chrV	-	TATA-less	TAF1-depleted	353	389980	390132	-152	YER113C	262.5	0.037448011	0.012487399	0.219777986	0.107771999	0.220869383	0.088302937	0.28005589	0.844401684	0.138802387	1	TRUE
1608	1622	YER114C	chrV	-	TATA-less	TAF1-enriched	1264	393964	393976	-12	YER114C	408	0.001510499	0.725125964	0.107054418	0.028474149	0.465249371	0.00294708	0.308149447	0.527429057	0.381752637	2	TRUE
1609	1623	CUT115	chrV	+	TATA-less	TAF1-enriched	24	395308	395254	-54	CUT115	6.1	0.917830923	NA	NA	NA	NA	NA	NA	NA	NA	NA	NA
1610	1624	YER116C	chrV	-	TATA-less	TAF1-enriched	69	396228	396271	-43	YER116C	321.3	0.000296887	0.080583086	0.232187133	0.025007983	0.54497368	0.000672957	0.174509572	0.642184767	0.069381555	2	TRUE
1611	1625	YER117W	chrV	+	TATA-less	TAF1-enriched	8970	396790	396741	-49	YER117W	19052.3	0.001704331	0.006904311	0.045857213	0.359285156	0.104295203	0.917316174	0.016558848	0.146110006	0.735557683	3	TRUE
1612	1626	YER118C	chrV	-	TATA-containing	TAF1-enriched	629	399196	399232	-36	YER118C	230.3	0.000376639	0.021290274	0.381857001	0.288361912	0.080420921	0.051438367	0.172230693	0.464342602	0.560061834	1	TRUE
1613	1627	YER119C	chrV	-	TATA-less	TAF1-enriched	339	400830	400868	-38	YER119C	151.7	0.008051803	0.250498584	0.330877174	0.942105193	0.162715123	0.654187826	0.051809426	0.071509925	0.503013203	0	FALSE
1614	1628	YER120W	chrV	+	TATA-less	TAF1-enriched	22907	401139	401109	-30	YER120W	1872.9	0.009223975	0.167829676	0.056466272	0.355387297	0.717621336	0.77938171	0.355387297	0.187629428	0.285139042	0	FALSE
1615	1629	YER122C	chrV	-	TATA-containing	TAF1-enriched	538	404363	404433	-70	YER122C	1178.4	0.000347549	0.277509092	0.088704441	0.038857984	0.407736995	0.024339562	0.159547031	0.436423722	0.231066325	2	TRUE
1616	1630	YER123W	chrV	+	TATA-less	TAF1-enriched	197	404674	404625	-49	YER123W	371.9	0.061824625	NA	NA	NA	NA	NA	NA	NA	NA	NA	NA
1617	1631	YER124C	chrV	-	TATA-containing	TAF1-depleted	691	408946	409102	-156	YER124C	1883.7	0.002978953	0.004951747	1	0.45625269	0.372178387	0.101362374	0.372178387	0.465817677	0.090124387	1	TRUE
1618	1632	CUT564	chrV	-	TATA-less	TAF1-enriched	1	409323	409357	-34	CUT564	35.7	0.0435357	0.105923858	0.748631286	0.188053004	0.30340697	0.687919723	0.098649918	0.033007458	0.854411443	1	TRUE
1619	1633	YER126C	chrV	-	TATA-less	TAF1-enriched	5675	414209	414208	1	YER126C	3936.8	0.009682948	0.081162157	0.907442132	0.079905623	0.191734458	0.100126145	0.293377855	0.459355168	0.545197787	0	FALSE
1620	1634	YER127W	chrV	+	TATA-less	TAF1-enriched	305	414502	414464	-38	YER127W	327.6	0.075150181	NA	NA	NA	NA	NA	NA	NA	NA	NA	NA
1621	1635	CUT566	chrV	-	TATA-less	TAF1-enriched	33	416492	416551	-59	CUT566	21.1	0.025554436	0.663397343	0.018761904	0.673649297	0.627879299	0.12137696	0.023534353	0.491885243	0.025558017	3	TRUE
1622	1636	CUT116	chrV	+	TATA-less	TAF1-enriched	6	421985	421929	-56	CUT116	0.1	0.632957901	NA	NA	NA	NA	NA	NA	NA	NA	NA	NA
1623	1637	YER130C	chrV	-	TATA-containing	TAF1-depleted	970	422354	422507	-153	YER130C	7028.1	0.000330695	0.198773281	0.320711627	0.089952842	0.084052814	0.14257637	0.084052814	0.057439976	0.200638976	0	FALSE
1624	1638	YER131W	chrV	+	TATA-less	TAF1-enriched	902	423719	423536	-183	YER131W	5024.3	0.007606739	0.067672957	0.002741082	0.450433995	0.278888989	0.329906225	0.693764009	0.433228885	0.061438994	1	TRUE
1625	1639	ANT145	chrV	-	TATA-less	TAF1-depleted	14	424790	424843	-53	ANT145	58.3	0.216870013	NA	NA	NA	NA	NA	NA	NA	NA	NA	NA
1626	1640	YER132C	chrV	-	TATA-less	TAF1-enriched	1399	430842	430891	-49	YER132C	102.2	0.331516936	NA	NA	NA	NA	NA	NA	NA	NA	NA	NA
1627	1642	CUT567	chrV	-	TATA-containing	TAF1-enriched	20041	431379	431377	2	CUT567	1339	0.016064052	0.386351703	0.038245685	0.589480621	0.589480621	0.885401434	0.641814887	0.486049284	0.589480621	1	TRUE
1628	1643	YER133W	chrV	+	TATA-less	TAF1-enriched	6817	432497	432433	-64	YER133W	2159.1	0.021391876	0.13017078	0.570350217	0.655343136	0.160670527	0.138405732	0.142489112	0.695783601	0.103950531	0	FALSE
1629	1644	CUT568	chrV	-	TATA-less	TAF1-enriched	255	432798	432830	-32	CUT568	194.6	0.003197836	0.043556747	0.814977642	0.036545107	0.891676597	0.002129642	0.56951605	0.346649134	0.165788891	3	TRUE
1630	1645	tH(GUG)E2	chrV	-	TATA-less	-	100	434590	434623	-33	tH(GUG)E2	42.1	0.204761704	NA	NA	NA	NA	NA	NA	NA	NA	NA	NA
1631	1646	orphan	chrV	+	TATA-less	TAF1-enriched	3	435634	435544	-90	orphan	0.2	0.623387628	NA	NA	NA	NA	NA	NA	NA	NA	NA	NA
1632	1647	YER134C	chrV	-	TATA-less	TAF1-enriched	1362	437765	437849	-84	YER134C	587.9	0.070852833	NA	NA	NA	NA	NA	NA	NA	NA	NA	NA
1633	1648	orphan	chrV	+	TATA-less	TAF1-enriched	166	439197	439181	-16	orphan	3.4	0.632007404	NA	NA	NA	NA	NA	NA	NA	NA	NA	NA
1634	1649	YER136W	chrV	+	TATA-less	TAF1-enriched	1964	439688	439521	-167	YER136W	1527.1	0.003965505	0.716337787	0.02924668	0.170920611	0.27895753	0.267021063	0.26506166	0.188343614	0.074551879	1	TRUE
1635	1650	YER137C	chrV	-	TATA-less	TAF1-depleted	38	442012	442086	-74	YER137C	1.5	0.389512548	NA	NA	NA	NA	NA	NA	NA	NA	NA	NA
1636	1651	orphan	chrV	+	TATA-containing	TAF1-depleted	3786	442625	442457	-168	orphan	11943.4	0.46621932	NA	NA	NA	NA	NA	NA	NA	NA	NA	NA
1637	1652	orphan	chrV	-	TATA-less	TAF1-enriched	81	452976	453121	-145	orphan	13.2	0.41325671	NA	NA	NA	NA	NA	NA	NA	NA	NA	NA
1638	1653	YER141W	chrV	+	TATA-less	TAF1-enriched	2533	453430	453427	-3	YER141W	2234.2	0.000312385	0.037062857	0.14005434	0.013902245	1	0.076853597	1	1	0.067659985	2	TRUE
1639	1654	YER142C	chrV	-	TATA-less	TAF1-enriched	147	456071	456103	-32	YER142C	185	0.059743931	NA	NA	NA	NA	NA	NA	NA	NA	NA	NA
1640	1655	orphan	chrV	-	TATA-less	TAF1-enriched	1937	460181	460232	-51	orphan	568.1	0.008834217	0.092484511	0.31559183	0.145665928	0.38265914	0.007550858	0.722088007	0.46508844	0.627673499	1	TRUE
1641	1656	YER144C	chrV	-	TATA-less	TAF1-depleted	156	460553	460614	-61	YER144C	52.2	0.049073075	0.477197586	0.067577263	0.417685497	0.514702631	0.114181512	0.622279462	0.7427272	0.287011759	0	FALSE
1642	1657	orphan	chrV	+	TATA-less	TAF1-enriched	171	461221	461130	-91	orphan	99.1	0.081180577	NA	NA	NA	NA	NA	NA	NA	NA	NA	NA
1643	1658	ANT136	chrV	+	TATA-less	TAF1-enriched	139	461221	461180	-41	ANT136	99.9	0.243398303	NA	NA	NA	NA	NA	NA	NA	NA	NA	NA
1644	1659	orphan	chrV	-	TATA-less	TAF1-enriched	659	461374	461407	-33	orphan	455.8	0.040690359	0.749692596	0.159517194	0.015408075	0.014111402	0.230226793	0.041213638	0.58679402	0.068916349	3	TRUE
1645	1660	YER145C	chrV	-	TATA-containing	TAF1-depleted	1096	461751	461766	-15	YER145C	619.3	0.146173844	NA	NA	NA	NA	NA	NA	NA	NA	NA	NA
1646	1661	YER146W	chrV	+	TATA-less	TAF1-enriched	2009	462625	462541	-84	YER146W	1116.8	0.123936039	NA	NA	NA	NA	NA	NA	NA	NA	NA	NA
1647	1662	YER148W	chrV	+	TATA-less	TAF1-enriched	711	465154	465110	-44	YER148W	3067.9	0.000655248	0.020248862	0.499079228	0.073978148	0.073978148	0.021072533	0.010485408	0.739515698	0.66384227	3	TRUE
1648	1663	YER149C	chrV	-	TATA-less	TAF1-enriched	758	467481	467521	-40	YER149C	341.7	0.015331076	0.483341238	0.781430814	0.370352509	0.654220585	0.33173481	0.009556971	0.321550296	0.262813249	1	TRUE
1649	1664	YER150W	chrV	+	TATA-containing	TAF1-depleted	1885	468422	468335	-87	YER150W	3839	0.000384423	0.025828169	0.00475575	0.084467044	0.362033064	0.064434573	0.007598987	0.000970053	1	4	TRUE
1650	1665	YER151C	chrV	-	TATA-less	TAF1-enriched	6683	472418	472498	-80	YER151C	1072.6	0.060453703	NA	NA	NA	NA	NA	NA	NA	NA	NA	NA
1651	1666	YER153C	chrV	-	TATA-less	TAF1-enriched	106	474684	474808	-124	YER153C	91.3	0.020102731	0.180332748	0.590021454	0.067771007	0.528621485	0.115151227	0.144392915	0.164496012	0.968188406	0	FALSE
1652	1667	YER154W	chrV	+	TATA-less	TAF1-enriched	2285	475056	475010	-46	YER154W	365.7	0.026105745	0.141558955	0.105875827	0.483623032	0.236578572	0.526037028	0.567550948	0.354906453	0.483623032	0	FALSE
1653	1668	YER155C	chrV	-	TATA-less	TAF1-enriched	3519	482962	483086	-124	YER155C	341.8	0.0069766	0.662791317	0.190809627	0.539859116	0.211322843	0.504085017	0.106059814	0.253924684	0.968247086	0	FALSE
1654	1669	orphan	chrV	-	TATA-less	TAF1-enriched	2598	482962	483098	-136	orphan	320.6	0.002399264	0.016887965	0.096765242	0.034474175	0.288585268	0.034710519	0.917384195	0.926134242	0.393231488	3	TRUE
1655	1670	CUT118	chrV	+	TATA-less	TAF1-enriched	82	483364	483319	-45	CUT118	48.7	0.163660049	NA	NA	NA	NA	NA	NA	NA	NA	NA	NA
1656	1671	YER156C	chrV	-	TATA-less	TAF1-enriched	3366	484313	484357	-44	YER156C	2907.5	0.000626125	0.51090059	0.380714059	0.428241971	0.767171971	0.034194113	0.156668956	0.260150047	0.048097274	2	TRUE
1657	1672	YER157W	chrV	+	TATA-less	TAF1-enriched	199	484808	484772	-36	YER157W	646.3	0.092802607	NA	NA	NA	NA	NA	NA	NA	NA	NA	NA
1658	1673	YER158W-A	chrV	+	TATA-containing	TAF1-enriched	1003	491536	491518	-18	YER158W-A	15.7	0.015855254	0.139175566	0.010279844	0.096969747	0.993663851	0.039333679	0.605726967	0.429869887	0.01683361	3	TRUE
1659	1674	YER159C	chrV	-	TATA-less	TAF1-depleted	160	NA	492121	NA	YER159C	1182.2	0.016972742	0.172362146	0.383724074	0.103084636	0.993655601	0.006521228	0.344025457	0.813350339	0.029947113	2	TRUE
1660	1675	tR(ACG)E	chrV	-	TATA-less	-	14	492407	492440	-33	tR(ACG)E	21.7	0.388013868	NA	NA	NA	NA	NA	NA	NA	NA	NA	NA
1661	1676	YER161C	chrV	-	TATA-less	TAF1-enriched	265	500353	500378	-25	YER161C	140.4	0.027156039	0.025360905	0.725326149	0.972088141	0.441437389	0.498045593	0.115365913	0.320336553	1	1	TRUE
1662	1677	CUT119	chrV	+	TATA-less	TAF1-enriched	617	500654	500635	-19	CUT119	25.2	0.063590096	NA	NA	NA	NA	NA	NA	NA	NA	NA	NA
1663	1678	YER162C	chrV	-	TATA-less	TAF1-depleted	227	502882	502929	-47	YER162C	189.5	0.04659496	0.051570761	0.013522886	0.134670691	0.873557013	0.837219453	0.238935902	0.651273944	0.898692208	1	TRUE
1664	1679	ST0954	chrV	+	TATA-less	TAF1-enriched	19899	504074	504068	-6	ST0954	1272.5	0.594493363	NA	NA	NA	NA	NA	NA	NA	NA	NA	NA
1665	1680	YER164W	chrV	+	TATA-less	TAF1-enriched	166	505258	505177	-81	YER164W	125.9	0.280820674	NA	NA	NA	NA	NA	NA	NA	NA	NA	NA
1666	1681	YER166W	chrV	+	TATA-less	TAF1-enriched	433	512511	512444	-67	YER166W	964.3	0.000830172	0.088737398	0.386501897	0.065765445	0.216883652	0.017527361	0.161988645	0.59027586	0.262557344	1	TRUE
1667	1682	YER167W	chrV	+	TATA-less	TAF1-enriched	24	518031	517918	-113	YER167W	28.9	0.197927103	NA	NA	NA	NA	NA	NA	NA	NA	NA	NA
1668	1683	YER168C	chrV	-	TATA-less	TAF1-enriched	1387	522658	522662	-4	YER168C	787.9	0.003363217	0.041751662	0.813388858	0.132829672	0.50756824	0.016420454	0.50756824	0.573199779	0.078132974	2	TRUE
1669	1684	YER169W	chrV	+	TATA-less	TAF1-enriched	175	523158	523122	-36	YER169W	287.8	0.022286905	0.358775019	0.131102777	0.277318047	0.291912639	0.031078491	0.088659708	0.660236746	0.661539667	1	TRUE
1670	1685	YER170W	chrV	+	TATA-less	TAF1-enriched	339	525963	525951	-12	YER170W	145.1	0.207281713	NA	NA	NA	NA	NA	NA	NA	NA	NA	NA
1671	1686	YER171W	chrV	+	TATA-containing	TAF1-enriched	210	527028	526993	-35	YER171W	472.4	0.005525829	0.130732586	0.233442332	0.426094129	0.407824047	0.726828181	0.052139601	0.901870142	0.774478696	0	FALSE
1672	1687	YER172C	chrV	-	TATA-less	TAF1-enriched	27	536074	536062	12	YER172C	455.1	0.022374384	0.009231627	0.026209746	0.23263286	0.879025603	0.828068895	0.917058282	0.150570932	0.130017023	2	TRUE
1673	1688	YER174C	chrV	-	TATA-less	TAF1-enriched	491	539256	539282	-26	YER174C	655.4	0.028385679	0.641477117	0.091425589	0.69026334	0.031406202	0.061119722	0.100629262	0.836960158	0.911156937	1	TRUE
1674	1689	ST4659	chrV	-	TATA-containing	TAF1-enriched	203	541398	541456	-58	ST4659	98.4	0.012370649	0.367447296	0.560929483	0.016912857	0.726092917	0.010798178	0.226193593	0.607291018	0.035556334	3	TRUE
1675	1690	YER176W	chrV	+	TATA-less	TAF1-enriched	22	541702	541648	-54	YER176W	112.7	0.000619364	0.129842504	0.365007891	0.029267863	0.769662053	0.028951598	0.182222212	0.135935516	0.204486166	2	TRUE
1676	1691	orphan	chrV	-	TATA-less	TAF1-enriched	140	544465	544543	-78	orphan	37.5	0.121561577	NA	NA	NA	NA	NA	NA	NA	NA	NA	NA
1677	1692	orphan	chrV	+	TATA-less	TAF1-enriched	57	545038	544908	-130	orphan	90.2	0.266954923	NA	NA	NA	NA	NA	NA	NA	NA	NA	NA
1678	1693	CUT571	chrV	-	TATA-less	TAF1-enriched	2489	544859	545034	-175	CUT571	478	0.247340279	NA	NA	NA	NA	NA	NA	NA	NA	NA	NA
1679	1694	YER177W	chrV	+	TATA-less	TAF1-enriched	1496	545679	545562	-117	YER177W	12056.9	0.161470021	NA	NA	NA	NA	NA	NA	NA	NA	NA	NA
1680	1695	orphan	chrV	-	TATA-less	TAF1-enriched	8	545898	545910	-12	orphan	1.5	0.125498728	NA	NA	NA	NA	NA	NA	NA	NA	NA	NA
1681	1696	YER178W	chrV	+	TATA-less	TAF1-enriched	10254	546836	546789	-47	YER178W	3466.2	0.000526372	0.075476174	0.085563546	0.19060661	0.277773168	0.112601054	0.338239877	0.073026829	0.949095037	0	FALSE
1682	1697	ST4661	chrV	-	TATA-less	TAF1-enriched	305	549159	549194	-35	ST4661	192.4	0.002512671	0.599743802	0.003552521	0.318272953	0.570801486	0.337764547	0.74340444	0.17040956	0.410870397	1	TRUE
1683	1698	YER180C-A	chrV	-	TATA-less	TAF1-enriched	207	551267	551368	-101	YER180C-A	44.7	0.252680373	NA	NA	NA	NA	NA	NA	NA	NA	NA	NA
1684	1700	YER183C	chrV	-	TATA-containing	TAF1-enriched	98	553906	553970	-64	YER183C	286	0.082882369	NA	NA	NA	NA	NA	NA	NA	NA	NA	NA
1685	1701	YER184C	chrV	-	TATA-less	TAF1-enriched	46	NA	559012	NA	YER184C	251.5	0.074574917	NA	NA	NA	NA	NA	NA	NA	NA	NA	NA
1686	1702	orphan	chrV	+	TATA-less	TAF1-enriched	13	560864	560810	-54	orphan	32.6	0.187110191	NA	NA	NA	NA	NA	NA	NA	NA	NA	NA
1687	1703	ST0970	chrV	+	TATA-less	TAF1-enriched	30	563016	562915	-101	ST0970	39.3	0.103881674	NA	NA	NA	NA	NA	NA	NA	NA	NA	NA
1688	1704	CUT572	chrV	-	TATA-less	TAF1-enriched	73	NA	567592	NA	CUT572	106.1	0.008231188	0.477231294	0.081746111	0.373557	0.702939213	0.001107561	0.426909435	0.145262407	0.974647772	1	TRUE
1689	1705	orphan	chrVI	-	TATA-less	TAF1-enriched	262	16432	16492	-60	orphan	145.9	0.046369864	0.251971872	0.05027406	0.968322403	0.320802358	0.263715012	0.090693854	0.829511805	0.218291111	0	FALSE
1690	1706	orphan	chrVI	+	TATA-less	TAF1-depleted	24	16723	16673	-50	orphan	54.1	0.043380876	0.056035755	0.87253032	0.554393543	0.045796795	0.265325584	0.433670295	0.248030189	0.737217841	1	TRUE
1691	1707	orphan	chrVI	-	TATA-less	TAF1-enriched	5	30876	31034	-158	orphan	22.2	0.771109364	NA	NA	NA	NA	NA	NA	NA	NA	NA	NA
1692	1708	YFL049W	chrVI	+	TATA-containing	TAF1-enriched	136	36821	36781	-40	YFL049W	122.8	0.081121207	NA	NA	NA	NA	NA	NA	NA	NA	NA	NA
1693	1709	YFL048C	chrVI	-	TATA-less	TAF1-enriched	73	40155	40202	-47	YFL048C	2004.7	0.000382303	0.459607588	0.307491119	0.055905052	0.144803744	0.013583579	0.144803744	0.05977599	0.284935451	1	TRUE
1694	1710	YFL047W	chrVI	+	TATA-less	TAF1-enriched	129	40448	40413	-35	YFL047W	1604.3	0.00353771	0.028713725	0.004293324	0.351417048	0.689626637	0.035268686	0.689626637	0.302471546	0.689626637	3	TRUE
1695	1711	YFL045C	chrVI	-	TATA-less	TAF1-enriched	12903	44426	44467	-41	YFL045C	9737.8	0.001278882	0.661348042	0.108231416	0.051004507	0.116985804	0.060223954	0.116985804	0.591336604	0.051004507	0	FALSE
1696	1712	CUT121	chrVI	+	TATA-less	TAF1-enriched	36	44724	44679	-45	CUT121	29.5	0.416153094	NA	NA	NA	NA	NA	NA	NA	NA	NA	NA
1697	1713	YFL044C	chrVI	-	TATA-less	TAF1-enriched	90	45534	45579	-45	YFL044C	873.7	0.028066231	0.098861238	0.021204043	0.161938581	0.473777413	0.454069929	0.473777413	0.355070277	0.35704158	1	TRUE
1698	1714	YFL042C	chrVI	-	TATA-less	TAF1-enriched	230	47731	47751	-20	YFL042C	993.2	0.000286079	0.870013401	0.185500317	0.296962796	0.103177907	0.092358932	0.040039168	0.035391154	0.296962796	2	TRUE
1699	1715	YFL041W	chrVI	+	TATA-containing	TAF1-enriched	209	49160	49121	-39	YFL041W	527.4	0.011746875	0.053882673	1	0.003835829	0.729805806	0.278865046	0.729805806	0.65567768	0.062171191	1	TRUE
1700	1716	ST0982	chrVI	+	TATA-less	TAF1-enriched	0	54632	54575	-57	ST0982	10.9	0.181666375	NA	NA	NA	NA	NA	NA	NA	NA	NA	NA
1701	1717	YFL039C	chrVI	-	TATA-containing	TAF1-depleted	38030	NA	54892	NA	YFL039C	107338	0.000702471	0.099890405	0.096789745	0.652272613	0.031326422	0.006213574	0.00180316	0.84624596	0.880604909	3	TRUE
1702	1718	ANT156	chrVI	+	TATA-less	TAF1-enriched	12	55075	55063	-12	ANT156	314.3	0.016450505	0.450265618	0.116876619	0.081589707	0.732391996	0.159581958	0.36886541	0.281052366	0.042579068	1	TRUE
1703	1719	YFL038C	chrVI	-	TATA-less	TAF1-enriched	1843	55977	56066	-89	YFL038C	6418.7	0.001485243	0.227679948	0.489283794	0.023557303	0.85296865	0.000113661	0.29858587	0.810901989	0.069827145	2	TRUE
1704	1720	YFL037W	chrVI	+	TATA-less	TAF1-enriched	921	56340	56271	-69	YFL037W	6868.7	0.00273549	0.148124121	0.007562045	0.382696824	0.582574766	0.060345098	0.012792648	0.347663051	0.582574766	2	TRUE
1705	1721	YFL036W	chrVI	+	TATA-less	TAF1-enriched	1399	58618	58581	-37	YFL036W	1174.3	0.003057144	0.13032871	0.041376261	0.823191297	0.823191297	0.301295985	0.044327509	0.77299254	0.823191297	2	TRUE
1706	1722	YFL034C-B	chrVI	-	TATA-less	TAF1-enriched	3617	63994	64034	-40	YFL034C-B	477.5	0.008065026	0.128837867	0.016626074	0.39209647	0.648458322	0.04627459	0.176465475	0.489044846	0.019937882	3	TRUE
1707	1723	YFL034C-A	chrVI	-	TATA-less	TAF1-enriched	9270	64954	64977	-23	YFL034C-A	1495.9	0.002959681	0.413166962	0.034099052	0.147418698	0.214750717	0.088204163	0.841403929	0.702222817	0.147418698	1	TRUE
1708	1724	YFL034W	chrVI	+	TATA-less	TAF1-enriched	139	65315	65288	-27	YFL034W	329.9	0.023473762	0.084280487	0.702614291	0.030471461	0.813127542	0.385068173	0.548456156	0.760227267	0.047471811	2	TRUE
1709	1725	YFL033C	chrVI	-	TATA-less	TAF1-enriched	4119	74616	74665	-49	YFL033C	336.9	0.032576817	0.40708821	0.620947244	0.300381437	0.043028435	0.030793767	0.936505486	0.313515505	0.008566891	3	TRUE
1710	1726	YFL031W	chrVI	+	TATA-less	TAF1-enriched	103262	NA	75113	NA	YFL031W	18224.9	0.057146469	NA	NA	NA	NA	NA	NA	NA	NA	NA	NA
1711	1727	YFL029C	chrVI	-	TATA-less	TAF1-enriched	677	79158	79183	-25	YFL029C	358	0.131181094	NA	NA	NA	NA	NA	NA	NA	NA	NA	NA
1712	1728	YFL028C	chrVI	-	TATA-less	TAF1-enriched	314	80184	80235	-51	YFL028C	451.8	0.068988074	NA	NA	NA	NA	NA	NA	NA	NA	NA	NA
1713	1729	YFL027C	chrVI	-	TATA-less	TAF1-enriched	242	81860	81923	-63	YFL027C	723.6	0.118028705	NA	NA	NA	NA	NA	NA	NA	NA	NA	NA
1714	1730	YFL026W	chrVI	+	TATA-less	TAF1-depleted	1492	82652	82550	-102	YFL026W	3696.3	0.018212316	0.205834084	0.462019501	0.834066335	0.46835691	0.104654264	0.834066335	0.109179303	0.910187614	0	FALSE
1715	1731	YFL025C	chrVI	-	TATA-less	TAF1-enriched	1194	87290	87313	-23	YFL025C	151.8	0.025335857	0.014710817	0.507613162	0.483269483	0.525381324	0.004777779	0.747710323	0.790090511	0.135481151	2	TRUE
1716	1732	ST0990	chrVI	+	TATA-less	TAF1-enriched	63	89777	89656	-121	ST0990	312.8	0.0012635	0.020911079	0.39653669	0.006485308	0.063241958	0.000198402	0.405032899	0.230526999	0.005332504	4	TRUE
1717	1733	YFL024C	chrVI	-	TATA-less	TAF1-enriched	1512	90611	90624	-13	YFL024C	410	0.00394575	0.578838543	0.007193185	0.114988821	0.447208325	0.909539761	0.659904655	0.958811533	0.118722345	1	TRUE
1718	1734	YFL023W	chrVI	+	TATA-less	TAF1-enriched	156	91011	90972	-39	YFL023W	238	0.002754063	0.466026748	0.071997672	0.042324367	0.939056766	0.030733139	0.939056766	0.921373654	0.480754832	2	TRUE
1719	1735	YFL022C	chrVI	-	TATA-less	TAF1-enriched	7907	94990	95071	-81	YFL022C	571	0.003822545	0.344463113	0.058655449	0.961877509	0.961877509	0.029235499	0.786503824	0.149918794	0.232109981	1	TRUE
1720	1736	YFL021W	chrVI	+	TATA-containing	TAF1-depleted	409	96128	96085	-43	YFL021W	670.8	0.009764587	0.847818791	0.086830648	0.095797847	0.190256028	0.117415169	0.83349725	0.415546304	0.264518725	0	FALSE
1721	1737	tP(UGG)F	chrVI	-	TATA-containing	-	6	101057	101194	-137	tP(UGG)F	4	0.923553819	NA	NA	NA	NA	NA	NA	NA	NA	NA	NA
1722	1738	YFL018C	chrVI	-	TATA-containing	TAF1-depleted	1406	103140	103210	-70	YFL018C	6705.5	0.000508865	0.328460346	0.103376612	0.61510052	0.028550357	0.516260791	0.131447411	0.390608925	0.030990016	2	TRUE
1723	1739	YFL017W-A	chrVI	+	TATA-less	TAF1-enriched	1816	103724	103645	-79	YFL017W-A	1398.1	0.869216377	NA	NA	NA	NA	NA	NA	NA	NA	NA	NA
1724	1740	YFL017C	chrVI	-	TATA-containing	TAF1-depleted	274	104429	104484	-55	YFL017C	1742.2	0.044751734	0.123463005	0.872997048	0.120635698	0.173487828	0.115907413	0.120635698	0.719108588	0.01887122	1	TRUE
1725	1741	YFL016C	chrVI	-	TATA-less	TAF1-enriched	782	106071	106242	-171	YFL016C	508.3	0.126045179	NA	NA	NA	NA	NA	NA	NA	NA	NA	NA
1726	1742	YFL013C	chrVI	-	TATA-less	TAF1-enriched	45	109929	109952	-23	YFL013C	359.4	0.007808337	0.115809921	0.988382276	0.004089506	0.87326735	0.00264256	0.018238369	0.069963096	0.749711867	3	TRUE
1727	1743	ST0998	chrVI	+	TATA-less	TAF1-enriched	154	110240	110230	-10	ST0998	58.4	0.019355047	0.494734735	0.257149801	0.53482748	0.088601908	0.934503127	0.010401562	0.579087001	0.936578468	1	TRUE
1728	1744	YFL010C	chrVI	-	TATA-less	TAF1-enriched	438	115738	115772	-34	YFL010C	754.5	0.011586057	0.049959588	0.003788846	0.842870883	0.275614279	0.141169511	0.275614279	0.522328129	0.574367601	2	TRUE
1729	1745	YFL009W	chrVI	+	TATA-less	TAF1-enriched	214	115988	115953	-35	YFL009W	64.5	0.175836131	NA	NA	NA	NA	NA	NA	NA	NA	NA	NA
1730	1746	orphan	chrVI	+	TATA-containing	TAF1-enriched	1	NA	118796	NA	orphan	4.2	0.358559618	NA	NA	NA	NA	NA	NA	NA	NA	NA	NA
1731	1747	CUT575	chrVI	-	TATA-less	TAF1-enriched	95	NA	119127	NA	CUT575	6.4	0.117607598	NA	NA	NA	NA	NA	NA	NA	NA	NA	NA
1732	1748	YFL008W	chrVI	+	TATA-less	TAF1-depleted	240	119428	119369	-59	YFL008W	162.1	0.106434833	NA	NA	NA	NA	NA	NA	NA	NA	NA	NA
1733	1749	YFL007W	chrVI	+	TATA-less	TAF1-enriched	1815	123391	123356	-35	YFL007W	580.8	0.000798467	0.058624626	0.243169883	0.095534768	0.116462399	0.391663959	0.02890581	0.676052809	0.356289782	1	TRUE
1734	1750	YFL005W	chrVI	+	TATA-less	TAF1-enriched	1181	130362	130189	-173	YFL005W	8486.9	0.036110386	0.965048788	0.292958871	0.987234082	0.712866582	0.432486606	0.86029059	0.901363992	0.017122913	1	TRUE
1735	1751	orphan	chrVI	-	TATA-less	TAF1-depleted	33	NA	131383	NA	orphan	284.4	0.016512218	0.030742463	0.328067124	0.075907497	0.28400702	0.028653435	0.835325737	0.374715618	0.243087596	2	TRUE
1736	1752	YFL004W	chrVI	+	TATA-less	TAF1-depleted	546	131799	131659	-140	YFL004W	4011.7	0.009325969	0.132406047	0.405020895	0.383123021	0.126444476	0.145253607	0.955333802	0.391238149	0.088323978	0	FALSE
1737	1753	orphan	chrVI	+	TATA-less	TAF1-enriched	683	131799	131667	-132	orphan	4020.7	0.004951106	0.063863628	0.609557422	0.353880862	0.141411953	0.11680964	0.822928606	0.37490058	0.084293143	0	FALSE
1738	1754	YFR001W	chrVI	+	TATA-less	TAF1-enriched	236	149129	149086	-43	YFR001W	353	0.044376068	0.337870684	0.87309364	0.163967349	0.21177859	0.237681377	0.013986411	0.192228074	0.297457895	1	TRUE
1739	1755	CUT576	chrVI	-	TATA-less	TAF1-enriched	16	149436	149746	-310	CUT576	7.3	0.703610358	NA	NA	NA	NA	NA	NA	NA	NA	NA	NA
1740	1756	YFR002W	chrVI	+	TATA-less	TAF1-enriched	179	150055	150007	-48	YFR002W	930.5	0.028233425	0.036141417	0.976456464	0.352659133	0.588161588	0.009375236	0.622005998	0.71497031	0.352659133	2	TRUE
1741	1757	YFR004W	chrVI	+	TATA-less	TAF1-enriched	1002	153402	153351	-51	YFR004W	2127.2	0.015425529	0.670092288	0.195284042	0.274816293	0.274816293	0.024240583	0.274816293	0.158594226	0.274816293	1	TRUE
1742	1758	YFR005C	chrVI	-	TATA-less	TAF1-enriched	483	155850	155896	-46	YFR005C	369.7	0.02505957	0.664280603	0.049933698	0.501477559	0.286590851	0.010438319	0.272021656	0.815905374	0.12734121	2	TRUE
1743	1759	YFR007W	chrVI	+	TATA-less	TAF1-enriched	216	159316	159224	-92	YFR007W	133.9	0.019020504	0.642244638	0.022651566	0.561599441	0.335976947	0.142113995	0.344025457	0.959064624	0.297568997	1	TRUE
1744	1760	YFR008W	chrVI	+	TATA-less	TAF1-enriched	503	160540	160519	-21	YFR008W	237.5	0.033395134	0.028099277	0.253262775	0.204885193	0.494835802	0.089203499	0.494835802	0.248475944	0.152634227	1	TRUE
1745	1761	tG(GCC)F1	chrVI	+	TATA-less	-	780	162242	162216	-26	tG(GCC)F1	3.2	0.435534529	NA	NA	NA	NA	NA	NA	NA	NA	NA	NA
1746	1762	YFR009W	chrVI	+	TATA-less	TAF1-enriched	1678	162480	162431	-49	YFR009W	5933.1	0.000421983	0.118473066	0.009267516	1	0.001045707	1	0.015400598	0.16760758	1	3	TRUE
1747	1763	YFR010W	chrVI	+	TATA-less	TAF1-enriched	1481	165015	164999	-16	YFR010W	942.3	0.001760078	0.719961396	0.055869088	0.085762515	0.682472045	0.011243087	0.50227716	0.597405168	0.037692041	2	TRUE
1748	1764	YFR011C	chrVI	-	TATA-less	TAF1-enriched	3074	167245	167282	-37	YFR011C	234.8	0.025848261	0.081539339	0.029459732	0.086868311	0.522911803	0.545291512	0.522911803	0.21399606	0.522911803	1	TRUE
1749	1765	YFR013W	chrVI	+	TATA-less	TAF1-enriched	1471	169906	169862	-44	YFR013W	89.1	0.136664561	NA	NA	NA	NA	NA	NA	NA	NA	NA	NA
1750	1766	orphan	chrVI	-	TATA-less	TAF1-enriched	185	173299	173358	-59	orphan	308.9	0.759029169	NA	NA	NA	NA	NA	NA	NA	NA	NA	NA
1751	1767	orphan	chrVI	-	TATA-less	TAF1-enriched	46	173610	173716	-106	orphan	624.7	0.098298282	NA	NA	NA	NA	NA	NA	NA	NA	NA	NA
1752	1768	YFR015C	chrVI	-	TATA-containing	TAF1-depleted	6120	176395	176467	-72	YFR015C	1847.2	0.055054289	NA	NA	NA	NA	NA	NA	NA	NA	NA	NA
1753	1769	orphan	chrVI	+	TATA-less	TAF1-enriched	117	177201	177060	-141	orphan	12.9	0.422240255	NA	NA	NA	NA	NA	NA	NA	NA	NA	NA
1754	1770	YFR016C	chrVI	-	TATA-less	TAF1-depleted	442	180657	180780	-123	YFR016C	451.8	0.00106807	0.383541751	0.12727634	0.029288894	0.399120123	0.001092034	0.836149581	0.853347053	0.029288894	3	TRUE
1755	1771	YFR017C	chrVI	-	TATA-containing	TAF1-enriched	20517	182926	182927	-1	YFR017C	1052.3	0.100006823	NA	NA	NA	NA	NA	NA	NA	NA	NA	NA
1756	1772	YFR018C	chrVI	-	TATA-less	TAF1-enriched	31	184244	184275	-31	YFR018C	632.8	0.004035387	0.917816223	0.128940773	0.022319316	0.610997377	0.000378946	0.610997377	0.302118189	0.004598246	3	TRUE
1757	1773	tS(GCU)F	chrVI	-	TATA-less	-	2799	191628	191623	5	tS(GCU)F	184.9	0.953553096	NA	NA	NA	NA	NA	NA	NA	NA	NA	NA
1758	1774	orphan	chrVI	-	TATA-less	TAF1-enriched	21	192017	192097	-80	orphan	18.5	0.105127057	NA	NA	NA	NA	NA	NA	NA	NA	NA	NA
1759	1775	orphan	chrVI	+	TATA-less	TAF1-enriched	48	192291	192285	-6	orphan	107.7	0.79856296	NA	NA	NA	NA	NA	NA	NA	NA	NA	NA
1760	1776	CUT577	chrVI	-	TATA-less	TAF1-enriched	58	194492	194539	-47	CUT577	42.4	0.061523795	NA	NA	NA	NA	NA	NA	NA	NA	NA	NA
1761	1777	YFR021W	chrVI	+	TATA-less	TAF1-enriched	2447	194760	194718	-42	YFR021W	605.1	0.001299069	0.815749991	0.145298134	0.237780137	0.059767581	0.127486719	0.160348187	0.022246534	0.322608147	1	TRUE
1762	1778	YFR022W	chrVI	+	TATA-containing	TAF1-enriched	35	196593	196560	-33	YFR022W	226.5	0.007280181	0.447607808	0.520498598	0.152197467	0.030180283	0.050970492	0.671606286	0.893208171	0.008905581	2	TRUE
1763	1779	YFR024C-A	chrVI	-	TATA-less	TAF1-enriched	468	203418	203457	-39	YFR024C-A	1039.1	0.000374486	0.102092037	0.102092037	0.161167065	0.993384918	0.020197818	0.366151874	0.115623941	0.993384918	1	TRUE
1764	1780	YFR025C	chrVI	-	TATA-less	TAF1-enriched	786	204785	204774	11	YFR025C	701.9	0.149822106	NA	NA	NA	NA	NA	NA	NA	NA	NA	NA
1765	1781	YFR028C	chrVI	-	TATA-less	TAF1-enriched	160	210080	210145	-65	YFR028C	629.9	0.088773015	NA	NA	NA	NA	NA	NA	NA	NA	NA	NA
1766	1782	orphan	chrVI	+	TATA-less	TAF1-enriched	11	210352	210320	-32	orphan	1.6	0.408143113	NA	NA	NA	NA	NA	NA	NA	NA	NA	NA
1767	1783	YFR029W	chrVI	+	TATA-less	TAF1-enriched	860	210919	210855	-64	YFR029W	148.6	0.066262923	NA	NA	NA	NA	NA	NA	NA	NA	NA	NA
1768	1784	orphan	chrVI	-	TATA-less	TAF1-enriched	0	212907	212939	-32	orphan	2.9	0.104941501	NA	NA	NA	NA	NA	NA	NA	NA	NA	NA
1769	1785	YFR030W	chrVI	+	TATA-containing	TAF1-enriched	687	213251	213203	-48	YFR030W	103.8	0.009004312	0.872822627	0.02409626	0.098961838	0.334826009	0.120235989	0.234985266	0.543779514	0.120122226	1	TRUE
1770	1786	YFR031C	chrVI	-	TATA-less	TAF1-enriched	86	220125	220139	-14	YFR031C	97.3	0.110126435	NA	NA	NA	NA	NA	NA	NA	NA	NA	NA
1771	1787	YFR031C-A	chrVI	-	TATA-less	TAF1-enriched	5356	221398	221458	-60	YFR031C-A	11545	0.021965812	0.001332271	0.153812395	0.478991878	0.271984385	0.086841342	0.04444645	0.908006015	0.184726405	2	TRUE
1772	1788	orphan	chrVI	-	TATA-less	TAF1-enriched	1900	221398	221559	-161	orphan	11523.3	0.006258291	0.00209937	0.767420841	0.801749897	0.288676998	0.080774408	0.038888893	0.991657192	0.176180667	2	TRUE
1773	1789	YFR032C-A	chrVI	-	TATA-less	TAF1-enriched	11514	223751	223845	-94	YFR032C-A	1708.7	0.000783415	0.650087683	0.046572844	0.045959215	0.20251961	0.026100689	0.064098326	0.641475318	0.045959215	4	TRUE
1774	1790	YFR033C	chrVI	-	TATA-less	TAF1-depleted	3580	224813	224875	-62	YFR033C	4038.8	0.037052418	0.344685684	0.033795987	0.289587977	0.004941878	0.959008086	0.124346711	0.308826405	0.03219834	3	TRUE
1775	1791	orphan	chrVI	+	TATA-less	TAF1-enriched	18	225782	225675	-107	orphan	77.3	0.656777856	NA	NA	NA	NA	NA	NA	NA	NA	NA	NA
1776	1792	YFR034C	chrVI	-	TATA-less	TAF1-enriched	325	225958	225980	-22	YFR034C	397.7	0.008594193	0.550532708	0.112502343	0.468014737	0.51830247	0.253120955	0.034571675	0.130167926	0.254117142	1	TRUE
1777	1793	orphan	chrVI	-	TATA-less	TAF1-enriched	173	226464	226513	-49	orphan	7	0.072578766	NA	NA	NA	NA	NA	NA	NA	NA	NA	NA
1778	1794	YFR035C	chrVI	-	TATA-containing	TAF1-enriched	492	226464	226772	-308	YFR035C	71.6	0.176458392	NA	NA	NA	NA	NA	NA	NA	NA	NA	NA
1779	1795	YFR037C	chrVI	-	TATA-less	TAF1-enriched	3369	229159	229192	-33	YFR037C	1936.6	0.000552335	0.054643685	0.054643685	0.003797221	0.779388384	0.002074732	0.363743278	0.308139061	0.182638851	2	TRUE
1780	1796	YFR038W	chrVI	+	TATA-less	TAF1-enriched	406	229427	229394	-33	YFR038W	712.2	0.005957694	0.165071655	1	0.019339427	0.862211548	0.009521283	0.143505725	0.822707084	0.081183294	2	TRUE
1781	1797	YFR039C	chrVI	-	TATA-less	TAF1-enriched	216	233619	233673	-54	YFR039C	126.5	0.044973382	0.238976073	0.610879886	0.275327309	0.529319289	0.16521138	0.08690419	0.289687971	0.168348462	0	FALSE
1782	1798	YFR040W	chrVI	+	TATA-less	TAF1-enriched	613	234188	234004	-184	YFR040W	329.5	0.081726847	NA	NA	NA	NA	NA	NA	NA	NA	NA	NA
1783	1799	YFR041C	chrVI	-	TATA-less	TAF1-enriched	151	238243	238277	-34	YFR041C	764.9	0.008185917	0.053423767	0.272452765	0.118092842	0.659359315	0.014199985	0.090825147	0.286555439	0.547781347	1	TRUE
1784	1800	YFR042W	chrVI	+	TATA-less	TAF1-enriched	154	238465	238422	-43	YFR042W	385.7	0.006781273	0.976792044	0.047907797	0.416434488	0.071779093	0.174575573	0.024661611	0.458975443	0.398395582	2	TRUE
1785	1801	YFR044C	chrVI	-	TATA-less	TAF1-enriched	64840	241419	241455	-36	YFR044C	2102.4	0.000665141	0.003703022	0.138318405	0.310242958	0.839179996	0.018374759	0.542638837	0.431871694	0.049788425	3	TRUE
1786	1802	CUT579	chrVI	-	TATA-less	TAF1-enriched	143	245867	245900	-33	CUT579	32.8	0.053152052	NA	NA	NA	NA	NA	NA	NA	NA	NA	NA
1787	1803	YFR048W	chrVI	+	TATA-less	TAF1-enriched	144	246150	246094	-56	YFR048W	228.8	0.006569393	0.930395826	0.137571319	0.116227524	0.867018808	0.059593661	0.46808333	0.044716127	0.054650198	1	TRUE
1788	1804	YFR049W	chrVI	+	TATA-less	TAF1-enriched	437	248404	248358	-46	YFR049W	277.8	0.004211182	0.693262856	0.225317167	0.088323978	0.134583714	0.037866991	0.203292033	0.860602899	0.437666773	1	TRUE
1789	1805	YFR050C	chrVI	-	TATA-less	TAF1-enriched	21435	249877	249912	-35	YFR050C	1103.2	0.003163448	1	0.159716197	0.071082309	0.133584603	0.014109697	0.047542469	0.656085855	0.659060751	2	TRUE
1790	1806	YFR051C	chrVI	-	TATA-less	TAF1-enriched	2284	251773	251828	-55	YFR051C	489	0.018141182	0.827469948	0.064995424	0.293489056	0.251795903	0.056005673	0.426129647	0.88562834	0.097857433	0	FALSE
1791	1807	CUT580	chrVI	-	TATA-less	TAF1-enriched	18	252237	252246	-9	CUT580	55.4	0.041342464	0.481773825	0.022241363	0.847234345	0.01226492	0.245789413	0.247726015	0.693737809	0.222424517	2	TRUE
1792	1808	YFR052W	chrVI	+	TATA-less	TAF1-enriched	16145	252524	252491	-33	YFR052W	2718.8	0.009561448	0.042164931	0.501382487	0.413176151	0.088736709	0.39802472	0.057630821	0.069204612	0.694472964	1	TRUE
1793	1809	YFR053C	chrVI	-	TATA-containing	TAF1-depleted	2615	NA	255155	NA	YFR053C	3062.3	0.013975849	0.76635385	0.431023722	0.014307294	0.954573833	0.003613206	0.18469116	0.219006912	0.509795968	2	TRUE
1794	1810	ST4738	chrVI	-	TATA-less	TAF1-enriched	209	263082	263200	-118	ST4738	111.4	0.365766159	NA	NA	NA	NA	NA	NA	NA	NA	NA	NA
1795	1811	CUT124	chrVI	+	TATA-less	TAF1-enriched	29	263567	263438	-129	CUT124	104.6	0.001157501	0.078990361	0.060974617	0.066352178	0.91698748	0.006089193	0.226024979	0.335740038	0.107061329	1	TRUE
1796	1812	CUT581	chrVI	-	TATA-less	TAF1-enriched	20	263823	263855	-32	CUT581	14.1	0.0492144	0.06141772	0.632298708	0.041244652	0.305598224	0.877772348	0.905173837	0.406263865	0.540852435	1	TRUE
1797	1813	YFR055W	chrVI	+	TATA-containing	TAF1-depleted	530	264262	264179	-83	YFR055W	1432.8	0.000879253	0.598269805	0.063062339	0.021408536	0.569245548	0.000713973	0.391029063	0.876634852	0.021408536	3	TRUE
1798	1814	YGL263W	chrVII	+	TATA-less	TAF1-enriched	110	2799	2771	-28	YGL263W	74.9	0.060330545	NA	NA	NA	NA	NA	NA	NA	NA	NA	NA
1799	1815	YGL257C	chrVII	-	TATA-less	TAF1-enriched	739	14248	14266	-18	YGL257C	446.6	0.111038503	NA	NA	NA	NA	NA	NA	NA	NA	NA	NA
1800	1816	YGL256W	chrVII	+	TATA-less	TAF1-enriched	489	14703	14661	-42	YGL256W	480.2	0.031295283	0.83641283	0.871118862	0.048712309	0.003276881	0.010937773	0.382960425	0.087199488	0.145921078	3	TRUE
1801	1817	YGL255W	chrVII	+	TATA-less	TAF1-enriched	236	21052	20933	-119	YGL255W	1051.8	0.00660461	0.004351396	0.003280596	0.166420722	0.598885022	0.668406637	0.814457913	0.777886145	0.166420722	2	TRUE
1802	1818	YGL254W	chrVII	+	TATA-less	TAF1-enriched	116	22330	22295	-35	YGL254W	280.6	0.005564028	0.042545138	0.192659427	0.057777078	0.140012555	0.148574414	0.140012555	0.187179425	0.709155655	1	TRUE
1803	1819	orphan	chrVII	-	TATA-containing	TAF1-enriched	85	23043	23134	-91	orphan	140.1	0.00857064	0.043050139	0.793321342	0.330735225	0.013456745	0.103909399	0.121948257	0.578357017	0.398068706	2	TRUE
1804	1820	YGL253W	chrVII	+	TATA-containing	TAF1-depleted	10894	23920	23888	-32	YGL253W	4912.8	0.00015516	0.093915845	0.164333454	0.015369656	1	0.001755283	1	1	0.127665162	2	TRUE
1805	1821	YGL252C	chrVII	-	TATA-less	TAF1-enriched	288	27487	27532	-45	YGL252C	713.6	0.001256611	0.057744027	0.247529014	0.150642688	0.272982892	0.057770752	0.272982892	0.299352595	0.620368156	0	FALSE
1806	1822	ST1043	chrVII	+	TATA-less	TAF1-enriched	321	27808	27765	-43	ST1043	146	0.002711992	0.540853982	0.033522636	0.244290007	0.346687218	0.027577893	0.219398293	0.375933444	0.911102391	2	TRUE
1807	1823	ST4747	chrVII	-	TATA-less	TAF1-enriched	123	NA	35275	NA	ST4747	411.6	0.036098208	0.976678765	0.473862676	0.005469333	0.294289548	0.00263312	0.968070063	0.598119517	0.055699068	2	TRUE
1808	1824	YGL247W	chrVII	+	TATA-less	TAF1-enriched	862	36977	36931	-46	YGL247W	519.7	0.082322743	NA	NA	NA	NA	NA	NA	NA	NA	NA	NA
1809	1825	YGL246C	chrVII	-	TATA-less	TAF1-enriched	797	38773	38809	-36	YGL246C	1010.9	0.023147469	0.061478226	0.02637313	0.321073143	0.748905972	0.70996583	0.305710956	0.273497044	0.178836688	1	TRUE
1810	1826	YGL245W	chrVII	+	TATA-less	TAF1-enriched	4124	39050	39008	-42	YGL245W	19198.8	0.000540847	0.094825407	0.152190825	0.093993527	0.437702049	0.0306162	0.347492232	0.650190139	0.093993527	1	TRUE
1811	1827	YGL244W	chrVII	+	TATA-less	TAF1-enriched	133	41490	41451	-39	YGL244W	565.6	0.047810359	0.53081725	0.070700257	0.121430567	0.666389555	1	0.113939605	0.917910274	0.835564177	0	FALSE
1812	1828	orphan	chrVII	+	TATA-containing	TAF1-enriched	206	48626	48612	-14	orphan	202.5	0.01889886	0.353595103	0.205405619	0.370678243	0.05193884	0.125886709	0.313400601	0.472504569	0.634196237	0	FALSE
1813	1829	YGL238W	chrVII	+	TATA-less	TAF1-enriched	765	49586	49549	-37	YGL238W	2586.4	0.00013842	0.016646542	0.16567215	0.072708511	1	0.009759821	1	1	0.167431309	2	TRUE
1814	1830	YGL237C	chrVII	-	TATA-less	TAF1-enriched	2318	53571	53612	-41	YGL237C	180.2	0.009593638	0.749098431	0.3373144	0.130306544	0.398649461	0.017084496	0.197071026	0.510602966	0.738055681	1	TRUE
1815	1831	YGL236C	chrVII	-	TATA-less	TAF1-enriched	172	55762	55813	-51	YGL236C	49	0.105908599	NA	NA	NA	NA	NA	NA	NA	NA	NA	NA
1816	1832	CUT585	chrVII	-	TATA-less	TAF1-enriched	183	56087	56115	-28	CUT585	216.6	0.001687156	0.269182727	0.062749444	0.762193122	0.003943039	0.621686004	0.00235053	0.150075481	0.107710617	2	TRUE
1817	1833	YGL234W	chrVII	+	TATA-less	TAF1-enriched	83928	56399	56380	-19	YGL234W	1410.2	0.001292506	0.108270494	0.644808689	0.016638263	0.613569511	0.014708025	0.320378795	0.51444467	0.00590552	3	TRUE
1818	1834	YGL233W	chrVII	+	TATA-less	TAF1-enriched	154	59132	59076	-56	YGL233W	620.9	0.008354732	0.437819332	0.044901202	0.219900466	0.904266252	0.367810428	0.125649206	0.091546076	0.258234526	1	TRUE
1819	1835	orphan	chrVII	+	TATA-less	TAF1-enriched	101	62110	62053	-57	orphan	1034.6	0.032515111	0.715352838	0.018848328	0.533157196	0.689537211	0.741348909	0.329689756	0.116922925	0.597972912	1	TRUE
1820	1836	YGL229C	chrVII	-	TATA-less	TAF1-depleted	63	67050	67188	-138	YGL229C	299.5	0.017099663	0.008956742	0.455201396	1	0.219795878	0.492422128	1	0.492422128	0.252098846	1	TRUE
1821	1837	YGL228W	chrVII	+	TATA-less	TAF1-enriched	241	67590	67552	-38	YGL228W	985.1	0.041798801	0.650392436	0.682277426	0.011392668	0.677118855	0.021733167	0.024952157	0.967015806	0.27613594	3	TRUE
1822	1838	ST1062	chrVII	+	TATA-less	TAF1-enriched	46	74731	74551	-180	ST1062	161.5	0.017747799	0.577534931	0.005887154	0.325597154	0.013342249	0.525730258	0.309192359	0.82680121	0.519544196	2	TRUE
1823	1839	orphan	chrVII	+	TATA-less	TAF1-depleted	159	74731	74691	-40	orphan	213.2	0.168197796	NA	NA	NA	NA	NA	NA	NA	NA	NA	NA
1824	1840	YGL225W	chrVII	+	TATA-containing	TAF1-enriched	13946	76884	76825	-59	YGL225W	977.3	0.004560743	0.400029496	0.163637615	0.043526112	0.088993305	0.636956	0.023029734	0.918280602	0.36493719	2	TRUE
1825	1841	YGL224C	chrVII	-	TATA-containing	TAF1-enriched	2333	78926	78966	-40	YGL224C	395.4	0.00025474	0.269035474	0.103346209	0.178239013	0.11292844	0.171399035	0.11292844	0.289502574	0.672893562	0	FALSE
1826	1842	orphan	chrVII	+	TATA-less	TAF1-enriched	52	79345	79293	-52	orphan	32.9	0.172933052	NA	NA	NA	NA	NA	NA	NA	NA	NA	NA
1827	1843	YGL223C	chrVII	-	TATA-less	TAF1-enriched	65	80335	80378	-43	YGL223C	503.6	0.007708423	0.141194844	0.466556211	0.157834232	0.034834113	0.982885358	0.653689548	0.863741521	0.653689548	1	TRUE
1828	1844	YGL222C	chrVII	-	TATA-less	TAF1-enriched	693	81195	81246	-51	YGL222C	1828.1	0.002380323	0.08296857	0.431441078	0.033121768	0.52843064	0.010312689	0.303295032	0.097196349	0.119694015	2	TRUE
1829	1845	YGL221C	chrVII	-	TATA-containing	TAF1-enriched	12774	82276	82311	-35	YGL221C	2441.6	0.350396452	NA	NA	NA	NA	NA	NA	NA	NA	NA	NA
1830	1846	YGL219C	chrVII	-	TATA-less	TAF1-enriched	312	84232	84282	-50	YGL219C	2110.2	0.046675322	0.355559855	0.073605181	0.520507762	0.440662193	0.663191413	0.303902489	0.205851134	0.948766157	0	FALSE
1831	1847	YGL216W	chrVII	+	TATA-less	TAF1-depleted	302	84634	84618	-16	YGL216W	149.9	0.003632542	0.255281315	0.054205033	0.212692923	0.873063398	0.950659913	0.073549168	0.433163818	0.068551925	0	FALSE
1832	1848	orphan	chrVII	-	TATA-less	TAF1-enriched	3	87077	87252	-175	orphan	3.6	0.028534174	0.529840684	0.952288435	0.125376801	0.882564095	0.03351664	0.001642382	0.023176384	0.008507027	4	TRUE
1833	1849	YGL215W	chrVII	+	TATA-less	TAF1-enriched	394	87552	87469	-83	YGL215W	570.2	0.000331972	0.003768171	0.138883792	0.022810095	1	0.00098306	0.468836848	1	0.284928952	3	TRUE
1834	1850	YGL213C	chrVII	-	TATA-less	TAF1-enriched	149	91219	91264	-45	YGL213C	282	0.05289218	NA	NA	NA	NA	NA	NA	NA	NA	NA	NA
1835	1851	YGL212W	chrVII	+	TATA-less	TAF1-enriched	76	91487	91434	-53	YGL212W	104.4	0.037778505	0.016246304	0.243916494	0.672418558	0.28147026	0.110395153	0.942759885	0.288759647	0.879517475	1	TRUE
1836	1852	YGL211W	chrVII	+	TATA-less	TAF1-enriched	261	92546	92505	-41	YGL211W	145.7	0.021981978	0.745791953	0.376608438	0.871758466	0.846402708	0.278508721	0.477535986	0.287856537	0.871758466	0	FALSE
1837	1853	YGL210W	chrVII	+	TATA-less	TAF1-enriched	119	93755	93752	-3	YGL210W	451.6	0.163608836	NA	NA	NA	NA	NA	NA	NA	NA	NA	NA
1838	1854	ST4766	chrVII	-	TATA-less	TAF1-depleted	23	NA	94687	NA	ST4766	108.9	0.026679308	0.399885138	0.055380276	0.05338459	0.879939555	0.022098156	0.005805415	0.813392448	0.121091765	2	TRUE
1839	1855	YGL209W	chrVII	+	TATA-containing	TAF1-depleted	252	95928	95806	-122	YGL209W	584.5	0.001348278	0.001630927	0.726312162	0.835463907	0.174453312	0.483125132	0.270286505	0.375122325	0.689582744	1	TRUE
1840	1856	YGL208W	chrVII	+	TATA-less	TAF1-enriched	149	97334	97326	-8	YGL208W	168.8	0.394429291	NA	NA	NA	NA	NA	NA	NA	NA	NA	NA
1841	1857	XUT	chrVII	-	TATA-less	TAF1-enriched	9	98135	98144	-9	XUT	11.2	0.038738252	0.172887978	0.433632964	0.033965511	0.169458898	0.861630011	0.404339039	0.383482289	0.298160716	1	TRUE
1842	1858	YGL207W	chrVII	+	TATA-less	TAF1-enriched	150	98924	98904	-20	YGL207W	2083.3	0.000843265	0.0334195	0.347824766	0.082658872	0.607104347	0.008951918	0.274526078	0.787401417	0.368189661	2	TRUE
1843	1859	YGL206C	chrVII	-	TATA-less	TAF1-enriched	2725	107538	107587	-49	YGL206C	13594.4	0.241777855	NA	NA	NA	NA	NA	NA	NA	NA	NA	NA
1844	1860	ST4769	chrVII	-	TATA-less	TAF1-enriched	106	110307	110374	-67	ST4769	49.6	0.041676031	0.89588685	0.652179436	0.038396706	0.25146809	0.51053797	0.134341458	0.010160653	0.524055799	2	TRUE
1845	1861	orphan	chrVII	-	TATA-less	TAF1-enriched	569	110648	110707	-59	orphan	28.6	0.736163761	NA	NA	NA	NA	NA	NA	NA	NA	NA	NA
1846	1863	YGL204C	chrVII	-	TATA-less	TAF1-enriched	7042	112028	112055	-27	YGL204C	1973.8	0.000752223	0.041747907	0.168416236	0.200836134	0.37584318	0.042103186	0.470549799	0.656602262	0.200836134	2	TRUE
1847	1864	YGL203C	chrVII	-	TATA-less	TAF1-depleted	63	114703	114776	-73	YGL203C	563.9	0.010997161	0.782545464	0.130850786	0.319949794	0.312268232	0.02867764	0.430876675	0.299526173	0.319949794	1	TRUE
1848	1865	YGL202W	chrVII	+	TATA-less	TAF1-enriched	15275	115969	115930	-39	YGL202W	6619.9	0.000723688	0.302176588	0.81613949	0.473769789	0.046603525	0.088050823	0.019278287	0.55118051	0.088504051	2	TRUE
1849	1866	YGL201C	chrVII	-	TATA-less	TAF1-depleted	1740	120922	120959	-37	YGL201C	316.6	0.001262091	0.079714179	0.128837867	0.317411381	0.104448066	0.114141711	0.374640314	0.306660462	0.718903244	0	FALSE
1850	1867	tK(CUU)G1	chrVII	-	TATA-less	-	0	NA	122261	NA	tK(CUU)G1	1.2	0.338196726	NA	NA	NA	NA	NA	NA	NA	NA	NA	NA
1851	1868	YGL200C	chrVII	-	TATA-less	TAF1-enriched	8434	123300	123357	-57	YGL200C	3019.9	0.089017415	NA	NA	NA	NA	NA	NA	NA	NA	NA	NA
1852	1869	YGL198W	chrVII	+	TATA-less	TAF1-enriched	6634	123627	123584	-43	YGL198W	2651.4	0.010667945	0.441566896	0.163347255	0.049489695	0.217692075	0.147713568	0.594144714	0.517745493	0.304931752	1	TRUE
1853	1870	YGL199C	chrVII	-	TATA-less	TAF1-enriched	435	124228	124245	-17	YGL199C	90.1	0.006112572	0.067094438	0.171934367	0.214351443	0.503749648	0.17497327	0.214351443	0.080659306	0.226336255	0	FALSE
1854	1871	YGL197W	chrVII	+	TATA-less	TAF1-enriched	1456	124716	124647	-69	YGL197W	967.7	0.007894011	0.053356579	0.123607071	0.454514495	0.836112401	0.162424874	0.534858824	0.83723177	0.514122491	0	FALSE
1855	1872	CUT587	chrVII	-	TATA-less	TAF1-enriched	452	131249	131283	-34	CUT587	72.5	0.166392198	NA	NA	NA	NA	NA	NA	NA	NA	NA	NA
1856	1873	YGL195W	chrVII	+	TATA-less	TAF1-enriched	15415	131544	131495	-49	YGL195W	669.2	0.010230869	0.410538042	0.001357135	0.072663603	0.35463279	0.216249744	0.149646929	0.014608165	0.729260731	2	TRUE
1857	1874	YGL194C-A	chrVII	-	TATA-less	TAF1-enriched	489	140167	140168	-1	YGL194C-A	463.7	0.019929612	0.100929406	0.013872551	0.095201207	0.948830051	0.835910446	0.724112245	0.771832906	0.177755876	1	TRUE
1858	1875	YGL194C	chrVII	-	TATA-less	TAF1-enriched	311	141749	141781	-32	YGL194C	114.2	0.048473087	0.662718375	0.07610781	0.258149287	0.197036601	0.064243901	0.258149287	0.7577674	0.31568487	0	FALSE
1859	1876	orphan	chrVII	-	TATA-less	TAF1-depleted	218	143896	144034	-138	orphan	347.5	0.067556898	NA	NA	NA	NA	NA	NA	NA	NA	NA	NA
1860	1877	orphan	chrVII	+	TATA-less	TAF1-enriched	91	144495	144384	-111	orphan	35.8	0.05751407	NA	NA	NA	NA	NA	NA	NA	NA	NA	NA
1861	1878	YGL191W	chrVII	+	TATA-less	TAF1-depleted	899	144914	144770	-144	YGL191W	1901.5	0.023228367	0.013374076	0.035054768	0.178026379	0.700373589	0.384632603	0.700373589	0.481561225	0.178026379	2	TRUE
1862	1879	CUT128	chrVII	+	TATA-less	TAF1-enriched	103	147895	147871	-24	CUT128	27.5	0.355282415	NA	NA	NA	NA	NA	NA	NA	NA	NA	NA
1863	1880	orphan	chrVII	+	TATA-less	TAF1-enriched	1	148250	148232	-18	orphan	27.1	0.057146469	NA	NA	NA	NA	NA	NA	NA	NA	NA	NA
1864	1881	YGL189C	chrVII	-	TATA-less	TAF1-enriched	2286	NA	149000	NA	YGL189C	1648.2	0.0009561	0.195854214	0.522523586	0.040780025	0.571957494	0.009897061	0.205633215	0.614578177	0.01061239	3	TRUE
1865	1882	YGL187C	chrVII	-	TATA-less	TAF1-enriched	276	NA	150634	NA	YGL187C	2691.6	0.332108908	NA	NA	NA	NA	NA	NA	NA	NA	NA	NA
1866	1883	YGL186C	chrVII	-	TATA-containing	TAF1-depleted	4737	152764	152808	-44	YGL186C	1984.7	0.134318022	NA	NA	NA	NA	NA	NA	NA	NA	NA	NA
1867	1884	CUT129	chrVII	+	TATA-containing	TAF1-enriched	331	153223	153187	-36	CUT129	26.7	0.781507754	NA	NA	NA	NA	NA	NA	NA	NA	NA	NA
1868	1885	YGL185C	chrVII	-	TATA-containing	TAF1-enriched	418	154309	154319	-10	YGL185C	462.5	0.003335476	0.322126957	1	0.030068054	1	0.000535516	1	1	1	2	TRUE
1869	1886	YGL182C	chrVII	-	TATA-less	TAF1-enriched	56	157569	157617	-48	YGL182C	13	0.307063399	NA	NA	NA	NA	NA	NA	NA	NA	NA	NA
1870	1887	YGL181W	chrVII	+	TATA-less	TAF1-enriched	221	157874	157859	-15	YGL181W	484.3	0.005373698	0.466302592	0.108996951	0.139843183	0.767783774	0.261441729	0.84186369	0.135205465	0.281321739	0	FALSE
1871	1888	YGL179C	chrVII	-	TATA-containing	TAF1-depleted	165	165132	165154	-22	YGL179C	2199.6	0.013088989	0.447502116	0.781364711	0.063426623	0.00212407	0.264622175	0.032015397	0.495419507	0.025076118	3	TRUE
1872	1889	orphan	chrVII	-	TATA-less	TAF1-enriched	166	NA	165560	NA	orphan	45.8	0.03395299	0.3765054	0.001288778	0.404410884	0.744751878	0.361573875	0.744751878	0.505195222	0.256159745	1	TRUE
1873	1890	orphan	chrVII	+	TATA-less	TAF1-enriched	568	165943	165925	-18	orphan	5.2	0.303383862	NA	NA	NA	NA	NA	NA	NA	NA	NA	NA
1874	1891	ST4788	chrVII	-	TATA-less	TAF1-enriched	29	166073	166100	-27	ST4788	39.2	0.042622634	0.223910044	0.071495793	0.723988315	0.585236516	0.901050368	0.31964164	0.245863161	0.948806119	0	FALSE
1875	1892	CUT130	chrVII	+	TATA-containing	TAF1-enriched	372	166765	166580	-185	CUT130	104.2	0.025861701	0.701281055	0.058965337	0.057564801	0.039339847	0.019996826	0.814717638	0.471629609	0.122723922	2	TRUE
1876	1893	YGL178W	chrVII	+	TATA-less	TAF1-depleted	234	166765	166744	-21	YGL178W	153.9	0.003868707	0.207613273	0.064852382	0.0251437	0.742113156	0.047816898	0.92965144	0.876491616	0.891475062	2	TRUE
1877	1894	YGL177W	chrVII	+	TATA-less	TAF1-enriched	27	167463	167306	-157	YGL177W	26.2	0.35611533	NA	NA	NA	NA	NA	NA	NA	NA	NA	NA
1878	1895	orphan	chrVII	+	TATA-less	TAF1-enriched	4900	167937	167848	-89	orphan	1661.7	0.001421405	1	0.049933035	0.512327036	0.145381208	0.397617713	0.094042689	2.88E-05	0.512327036	2	TRUE
1879	1896	YGL176C	chrVII	-	TATA-less	TAF1-depleted	31	173056	173124	-68	YGL176C	191	0.021053591	0.306411394	0.050391625	0.80756749	0.188424979	0.006427044	0.757689672	0.833958297	0.10793791	1	TRUE
1880	1897	YGL173C	chrVII	-	TATA-less	TAF1-enriched	3985	NA	180436	NA	YGL173C	2251.1	0.000215963	0.232111316	0.122424714	0.100131249	0.207273185	0.017789147	0.121516879	0.274722925	0.379954405	1	TRUE
1881	1898	YGL172W	chrVII	+	TATA-less	TAF1-enriched	304	180712	180668	-44	YGL172W	252.6	0.005589103	0.386100904	0.135090001	0.100646405	0.719068179	0.091571951	0.380919633	0.345237314	0.006157249	1	TRUE
1882	1899	YGL171W	chrVII	+	TATA-less	TAF1-enriched	3418	182407	182356	-51	YGL171W	1547	0.003213836	0.511979476	0.019722479	0.898381462	0.00805146	0.433554803	0.011662405	0.05796238	0.50256607	3	TRUE
1883	1900	YGL169W	chrVII	+	TATA-less	TAF1-enriched	415	186027	186000	-27	YGL169W	320.7	0.000775244	0.074713838	0.565674418	0.135574196	0.370527305	0.036311712	0.067054381	0.165991914	0.229344591	1	TRUE
1884	1901	YGL167C	chrVII	-	TATA-less	TAF1-enriched	6295	190664	190840	-176	YGL167C	5733.1	0.003700374	0.085853404	0.075746849	0.254226947	0.267753698	0.298522921	0.767992428	0.893552272	0.056708249	0	FALSE
1885	1902	YGL166W	chrVII	+	TATA-less	TAF1-enriched	114	191156	191118	-38	YGL166W	756.9	0.00081834	0.551268318	0.476386661	0.053074106	0.042372874	0.00077824	0.223260609	0.530746152	0.011107796	3	TRUE
1886	1903	YGL164C	chrVII	-	TATA-less	TAF1-enriched	225	193295	193337	-42	YGL164C	115.4	0.150780239	NA	NA	NA	NA	NA	NA	NA	NA	NA	NA
1887	1904	YGL163C	chrVII	-	TATA-less	TAF1-enriched	197	196502	196530	-28	YGL163C	133.8	0.147009801	NA	NA	NA	NA	NA	NA	NA	NA	NA	NA
1888	1905	ST4796	chrVII	-	TATA-less	TAF1-enriched	11	197617	197655	-38	ST4796	33.7	0.594207633	NA	NA	NA	NA	NA	NA	NA	NA	NA	NA
1889	1906	YGL162W	chrVII	+	TATA-containing	TAF1-depleted	279	198136	198092	-44	YGL162W	185.2	0.021383478	0.316110879	0.041949443	0.861024932	0.454445244	0.510862691	0.38138454	0.285326879	0.272132902	1	TRUE
1890	1907	YGL161C	chrVII	-	TATA-less	TAF1-enriched	1370	NA	200210	NA	YGL161C	1689.6	0.000382417	0.011267009	0.29754668	0.048189194	0.539779079	0.006400662	0.152522932	1	0.453614939	3	TRUE
1891	1908	YGL159W	chrVII	+	TATA-less	TAF1-enriched	130	202735	202709	-26	YGL159W	305.7	0.016767763	0.002000981	0.592772469	0.228479023	0.36211013	0.141375683	0.473953068	0.752649821	0.473953068	1	TRUE
1892	1909	YGL157W	chrVII	+	TATA-containing	TAF1-depleted	121	208973	208954	-19	YGL157W	1816.2	0.003364006	0.052866858	0.481431215	0.71772707	0.099594019	0.033499767	0.056924462	0.267132553	0.464761049	1	TRUE
1893	1910	YGL154C	chrVII	-	TATA-less	TAF1-enriched	236	216063	216100	-37	YGL154C	280.2	0.00147014	0.988302645	0.010741077	0.455181762	0.980780455	0.009841368	0.213251732	0.942149751	0.028362783	3	TRUE
1894	1911	YGL151W	chrVII	+	TATA-less	TAF1-enriched	553	217533	217479	-54	YGL151W	252.9	0.000855171	0.505145002	0.203284509	0.06196656	0.746291829	0.005186183	0.307551861	0.18773971	0.06196656	1	TRUE
1895	1912	YGL150C	chrVII	-	TATA-less	TAF1-enriched	167	225511	225747	-236	YGL150C	1354.9	0.005859085	0.311460622	0.080878282	0.772394821	0.499737913	0.019068026	0.772394821	0.350546219	0.077127638	1	TRUE
1896	1913	YGL148W	chrVII	+	TATA-less	TAF1-enriched	1264	226382	226370	-12	YGL148W	3832.2	0.020138044	0.745130467	0.249111649	0.871415778	0.770784612	0.007026292	0.331467376	0.933386904	0.03536228	2	TRUE
1897	1914	CUT133	chrVII	+	TATA-less	TAF1-enriched	624	228914	228814	-100	CUT133	59.1	0.004142275	0.587737496	0.151036762	0.113889054	0.37304178	0.00988744	0.238121537	0.225448259	0.60192529	1	TRUE
1898	1915	YGL146C	chrVII	-	TATA-less	TAF1-enriched	50	229637	229764	-127	YGL146C	53	0.20241798	NA	NA	NA	NA	NA	NA	NA	NA	NA	NA
1899	1916	YGL145W	chrVII	+	TATA-containing	TAF1-enriched	86	230241	230173	-68	YGL145W	405	0.000550975	0.446087168	0.037459371	0.505322703	0.347723435	0.041234988	0.185419749	0.122631691	0.141910223	2	TRUE
1900	1917	YGL144C	chrVII	-	TATA-less	TAF1-enriched	100	234507	234528	-21	YGL144C	241.7	0.016343484	0.090377424	0.849482529	0.333295039	0.227288224	0.124032073	0.203607499	0.176291891	0.349523064	0	FALSE
1901	1918	YGL143C	chrVII	-	TATA-less	TAF1-enriched	955	235938	235966	-28	YGL143C	261.7	0.028061768	0.022860498	0.000792835	0.968131865	0.660324269	0.391898775	0.046637198	0.733548904	0.457423426	3	TRUE
1902	1919	YGL140C	chrVII	-	TATA-less	TAF1-enriched	10979	245153	245199	-46	YGL140C	149.9	0.127393177	NA	NA	NA	NA	NA	NA	NA	NA	NA	NA
1903	1920	YGL139W	chrVII	+	TATA-less	TAF1-enriched	871	245437	245402	-35	YGL139W	4873.3	0.001030558	0.793724766	0.086505532	0.074707915	0.203004502	0.070632385	0.064905953	0.162424874	0.610601346	0	FALSE
1904	1921	YGL137W	chrVII	+	TATA-less	TAF1-enriched	199	249879	249841	-38	YGL137W	3865.1	0.00055415	0.615075735	0.005051642	0.423007257	0.616540531	0.003382015	0.423007257	0.300966043	0.423007257	2	TRUE
1905	1922	YGL136C	chrVII	-	TATA-less	TAF1-enriched	78	253880	253914	-34	YGL136C	503.6	0.066397767	NA	NA	NA	NA	NA	NA	NA	NA	NA	NA
1906	1923	YGL135W	chrVII	+	TATA-less	TAF1-depleted	73834	254587	254577	-10	YGL135W	42388.4	0.000735342	0.034303811	0.158248097	0.097243917	0.342144292	0.032278928	0.326031768	0.677617553	0.097243917	2	TRUE
1907	1924	YGL134W	chrVII	+	TATA-less	TAF1-enriched	643	255737	255573	-164	YGL134W	213.1	0.267875098	NA	NA	NA	NA	NA	NA	NA	NA	NA	NA
1908	1925	CUT592	chrVII	-	TATA-less	TAF1-enriched	9	257234	257288	-54	CUT592	80.7	0.508689802	NA	NA	NA	NA	NA	NA	NA	NA	NA	NA
1909	1926	YGL133W	chrVII	+	TATA-less	TAF1-depleted	109	257857	257537	-320	YGL133W	227.2	0.060937173	NA	NA	NA	NA	NA	NA	NA	NA	NA	NA
1910	1927	YGL131C	chrVII	-	TATA-containing	TAF1-enriched	140	265907	265889	18	YGL131C	395.3	0.019104287	0.220564744	0.047956269	0.795874979	0.517811079	0.54497026	0.948434899	0.786123594	0.136892448	1	TRUE
1911	1928	YGL130W	chrVII	+	TATA-less	TAF1-enriched	1009	266148	266103	-45	YGL130W	676.3	0.008077461	0.022196643	0.052698542	0.528494281	0.411195515	0.089216452	0.048757728	0.97534863	0.528494281	2	TRUE
1912	1929	YGL129C	chrVII	-	TATA-containing	TAF1-enriched	412	269099	269146	-47	YGL129C	1783	0.002784957	0.006009869	0.078099963	0.399608961	0.223033461	0.727539825	0.100227786	0.033831647	0.787260686	2	TRUE
1913	1930	CUT134	chrVII	+	TATA-less	TAF1-enriched	12	269368	269252	-116	CUT134	9.9	0.226116278	NA	NA	NA	NA	NA	NA	NA	NA	NA	NA
1914	1931	YGL127C	chrVII	-	TATA-less	TAF1-enriched	3186	270740	270801	-61	YGL127C	696.4	0.008113897	0.171934367	0.011935411	0.044877077	0.17098634	0.162263658	0.873518506	0.564993325	0.014224668	3	TRUE
1915	1932	orphan	chrVII	+	TATA-less	TAF1-enriched	153	271678	271650	-28	orphan	336.6	0.000961472	0.022032064	0.502283533	0.34997075	0.707321292	0.056403121	0.487059563	0.06794012	0.221620881	1	TRUE
1916	1933	ST4814	chrVII	-	TATA-less	TAF1-enriched	191	272862	272881	-19	ST4814	71.1	0.006605102	0.632194539	0.021924591	0.422336134	0.230298542	0.263605449	0.768804275	0.813518603	0.017532438	2	TRUE
1917	1934	CUT593	chrVII	-	TATA-less	TAF1-enriched	41	276865	277037	-172	CUT593	17.5	0.729927978	NA	NA	NA	NA	NA	NA	NA	NA	NA	NA
1918	1935	YGL123W	chrVII	+	TATA-less	TAF1-enriched	132536	277687	277558	-129	YGL123W	70682.6	0.00035137	0.202174033	0.057664063	0.05733858	0.026038945	0.014134767	0.004946956	0.600055613	0.684641982	3	TRUE
1919	1936	orphan	chrVII	+	TATA-less	TAF1-depleted	186	278340	278337	-3	orphan	987.8	0.700863996	NA	NA	NA	NA	NA	NA	NA	NA	NA	NA
1920	1937	YGL122C	chrVII	-	TATA-less	TAF1-enriched	3301	280500	280569	-69	YGL122C	2076.9	0.000278806	0.148297026	0.030727219	0.034738426	0.539885947	0.002087348	0.152631099	1	1	3	TRUE
1921	1938	CUT135	chrVII	+	TATA-less	TAF1-enriched	1100	280820	280812	-8	CUT135	233	0.009435496	0.261940712	0.466337001	0.030577863	0.560213291	0.005241484	0.879489794	0.503099256	0.393194971	2	TRUE
1922	1939	YGL120C	chrVII	-	TATA-less	TAF1-enriched	3218	283937	283993	-56	YGL120C	3437.5	0.025486027	0.806420461	0.133378961	0.107264828	1	0.037590876	0.093402088	0.69663525	0.107264828	1	TRUE
1923	1940	YGL119W	chrVII	+	TATA-less	TAF1-enriched	110	284422	284390	-32	YGL119W	1665.1	0.003440106	0.097387769	0.080731995	0.355410112	0.338783043	0.785542676	0.338783043	0.216856607	0.168168399	0	FALSE
1924	1941	CUT136	chrVII	+	TATA-less	TAF1-enriched	300	NA	286133	NA	CUT136	113	0.2247207	NA	NA	NA	NA	NA	NA	NA	NA	NA	NA
1925	1942	YGL117W	chrVII	+	TATA-containing	TAF1-depleted	121	288446	288430	-16	YGL117W	334.4	0.273893342	NA	NA	NA	NA	NA	NA	NA	NA	NA	NA
1926	1943	orphan	chrVII	-	TATA-less	TAF1-enriched	5	289186	289382	-196	orphan	61.7	0.18201985	NA	NA	NA	NA	NA	NA	NA	NA	NA	NA
1927	1944	YGL116W	chrVII	+	TATA-less	TAF1-depleted	546	289703	289668	-35	YGL116W	415.2	0.321837213	NA	NA	NA	NA	NA	NA	NA	NA	NA	NA
1928	1945	YGL115W	chrVII	+	TATA-less	TAF1-enriched	807	291966	291940	-26	YGL115W	2019.7	0.025817444	0.613452878	0.129657827	0.631138118	0.47895659	0.051948014	0.47895659	0.468515248	0.154417172	0	FALSE
1929	1946	YGL114W	chrVII	+	TATA-less	TAF1-enriched	65	293257	293218	-39	YGL114W	113.9	0.13745674	NA	NA	NA	NA	NA	NA	NA	NA	NA	NA
1930	1947	YGL113W	chrVII	+	TATA-less	TAF1-enriched	90	295926	295870	-56	YGL113W	435.7	0.003496215	0.571151697	0.029555265	0.162736426	0.775095581	0.009238964	0.737854427	0.041952829	0.08498625	3	TRUE
1931	1948	YGL111W	chrVII	+	TATA-less	TAF1-enriched	374	300005	299951	-54	YGL111W	788.2	0.000553276	0.350561956	0.136812784	0.010332945	0.401553609	0.002688122	0.176968289	0.991770913	0.01132435	3	TRUE
1932	1949	YGL110C	chrVII	-	TATA-containing	TAF1-depleted	284	303373	303432	-59	YGL110C	388.1	0.271807368	NA	NA	NA	NA	NA	NA	NA	NA	NA	NA
1933	1950	YGL108C	chrVII	-	TATA-containing	TAF1-enriched	435	304068	304106	-38	YGL108C	393.9	0.006999045	0.412294472	0.568016115	0.045857695	0.569125161	0.002419494	0.202308633	0.732631749	0.053291685	2	TRUE
1934	1951	YGL107C	chrVII	-	TATA-less	TAF1-enriched	193	NA	306274	NA	YGL107C	451.4	0.004336811	0.130188243	1	0.051012804	0.457749624	0.004635558	0.457749624	0.911244058	0.059795711	1	TRUE
1935	1952	YGL106W	chrVII	+	TATA-less	TAF1-enriched	23357	306578	306531	-47	YGL106W	2083.2	0.074797966	NA	NA	NA	NA	NA	NA	NA	NA	NA	NA
1936	1953	orphan	chrVII	-	TATA-containing	TAF1-depleted	28	306959	306988	-29	orphan	19.9	0.134647672	NA	NA	NA	NA	NA	NA	NA	NA	NA	NA
1937	1954	YGL105W	chrVII	+	TATA-less	TAF1-enriched	3569	307476	307414	-62	YGL105W	7265.4	0.000401619	0.288425451	0.059125762	0.131002287	0.228866612	0.078078287	0.16238319	0.178651726	0.728398758	0	FALSE
1938	1955	YGL103W	chrVII	+	TATA-less	TAF1-enriched	255466	310989	310951	-38	YGL103W	22766	0.001393734	0.009274571	0.004148887	0.505673363	0.019382201	0.70799163	0.019382201	0.00254054	0.771717655	5	TRUE
1939	1956	YGL101W	chrVII	+	TATA-containing	TAF1-enriched	508	312209	312181	-28	YGL101W	750	0.295049009	NA	NA	NA	NA	NA	NA	NA	NA	NA	NA
1940	1957	YGL100W	chrVII	+	TATA-less	TAF1-enriched	154	313248	313197	-51	YGL100W	919.1	0.031144666	0.006249687	0.344174342	0.124008897	0.292603711	0.818146155	0.058176114	0.516994923	0.808107844	1	TRUE
1941	1958	CUT595	chrVII	-	TATA-less	TAF1-enriched	406	314204	314359	-155	CUT595	67.4	0.531291891	NA	NA	NA	NA	NA	NA	NA	NA	NA	NA
1942	1959	YGL099W	chrVII	+	TATA-less	TAF1-enriched	8233	314644	314597	-47	YGL099W	651.3	0.428378366	NA	NA	NA	NA	NA	NA	NA	NA	NA	NA
1943	1960	orphan	chrVII	+	TATA-less	TAF1-enriched	13494	316840	316788	-52	orphan	11954	0.000133552	0.070951492	0.185421895	0.113532476	0.146880955	0.125457855	0.146880955	0.06110093	0.428794287	0	FALSE
1944	1961	YGL098W	chrVII	+	TATA-containing	TAF1-enriched	94	317357	317271	-86	YGL098W	261.2	0.006209167	0.042169948	0.012551076	0.854930655	0.249062299	0.172287361	0.035158286	0.441492534	0.616513401	3	TRUE
1945	1962	ST1139	chrVII	+	TATA-less	TAF1-enriched	171	320081	320017	-64	ST1139	1657	0.006988425	0.204711132	0.261901814	0.002934596	0.844668384	0.001285388	0.844668384	0.800315438	0.206010872	2	TRUE
1946	1963	YGL097W	chrVII	+	TATA-less	TAF1-enriched	246	321786	321739	-47	YGL097W	815.7	0.000283646	0.154406531	0.024140539	0.531543834	0.113093393	0.04291616	0.075166155	0.682465607	0.265634831	2	TRUE
1947	1964	orphan	chrVII	-	TATA-less	TAF1-depleted	439	323205	323224	-19	orphan	14.3	0.70525584	NA	NA	NA	NA	NA	NA	NA	NA	NA	NA
1948	1965	ST4827	chrVII	-	TATA-less	TAF1-enriched	116	324192	324222	-30	ST4827	38.7	0.742462523	NA	NA	NA	NA	NA	NA	NA	NA	NA	NA
1949	1966	orphan	chrVII	+	TATA-less	TAF1-enriched	105	325007	324955	-52	orphan	19.8	0.079448872	NA	NA	NA	NA	NA	NA	NA	NA	NA	NA
1950	1967	orphan	chrVII	-	TATA-less	TAF1-enriched	2	NA	326476	NA	orphan	15.6	0.296687839	NA	NA	NA	NA	NA	NA	NA	NA	NA	NA
1951	1968	YGL095C	chrVII	-	TATA-less	TAF1-enriched	243	330646	330657	-11	YGL095C	799.1	0.020306427	0.071798579	0.313050895	0.512740158	0.280308337	0.636988203	0.049561307	0.973735011	0.979653757	1	TRUE
1952	1969	YGL094C	chrVII	-	TATA-containing	TAF1-enriched	680	334596	334644	-48	YGL094C	447.7	0.0587502	NA	NA	NA	NA	NA	NA	NA	NA	NA	NA
1953	1970	YGL093W	chrVII	+	TATA-less	TAF1-enriched	552	334874	334848	-26	YGL093W	320.6	0.031550264	0.195476274	0.415331703	0.028459451	0.311636193	0.245142655	0.842128046	0.253596164	0.006917812	2	TRUE
1954	1971	CUT596	chrVII	-	TATA-less	TAF1-enriched	142	337578	337595	-17	CUT596	26	0.020500159	0.03850459	0.336123191	0.133442476	0.898373657	0.187153702	0.277661861	0.40971015	0.250372615	1	TRUE
1955	1972	YGL092W	chrVII	+	TATA-less	TAF1-enriched	2924	NA	337823	NA	YGL092W	437.9	0.001643791	0.716379474	0.014630931	0.107872927	0.208533638	0.118309119	0.082708865	0.202596092	0.435370153	1	TRUE
1956	1973	orphan	chrVII	-	TATA-less	TAF1-enriched	20	345710	345742	-32	orphan	5.5	0.398511702	NA	NA	NA	NA	NA	NA	NA	NA	NA	NA
1957	1974	YGL088W	chrVII	+	TATA-containing	TAF1-depleted	43607	346020	345986	-34	YGL088W	827332.2	0.000182754	0.0109537	1	0.005319828	1	0.002374799	1	1	0.021596366	4	TRUE
1958	1975	CUT137	chrVII	+	TATA-less	TAF1-enriched	4	346565	346531	-34	CUT137	17.9	0.612273813	NA	NA	NA	NA	NA	NA	NA	NA	NA	NA
1959	1976	YGL087C	chrVII	-	TATA-less	TAF1-enriched	887	346939	346947	-8	YGL087C	1586	0.000406777	0.036177124	0.147302615	0.071369129	0.869794012	0.025174352	0.869794012	0.469088373	0.869794012	2	TRUE
1960	1977	YGL086W	chrVII	+	TATA-less	TAF1-enriched	197	347209	347187	-22	YGL086W	407	0.08328791	NA	NA	NA	NA	NA	NA	NA	NA	NA	NA
1961	1978	YGL085W	chrVII	+	TATA-containing	TAF1-enriched	112	349635	349573	-62	YGL085W	113.5	0.270731565	NA	NA	NA	NA	NA	NA	NA	NA	NA	NA
1962	1979	YGL084C	chrVII	-	TATA-less	TAF1-enriched	1834	352290	352344	-54	YGL084C	381.1	0.005603731	0.090951479	0.00799741	0.040239564	0.288436385	0.065115973	0.560122435	0.4644116	0.139782021	2	TRUE
1963	1980	YGL083W	chrVII	+	TATA-less	TAF1-enriched	244	353038	352990	-48	YGL083W	586.4	0.081246293	NA	NA	NA	NA	NA	NA	NA	NA	NA	NA
1964	1981	ST4836	chrVII	-	TATA-less	TAF1-enriched	212	355508	355538	-30	ST4836	95.3	0.048606455	0.127217985	0.48566624	0.025904141	0.009945902	0.014505442	0.823718733	0.334307718	0.823718733	3	TRUE
1965	1982	YGL082W	chrVII	+	TATA-less	TAF1-depleted	126	355779	355748	-31	YGL082W	483.3	0.048059829	0.100325238	0.554986806	0.462930287	1	0.003876848	0.441902751	0.527548503	0.278556163	1	TRUE
1966	1983	YGL080W	chrVII	+	TATA-less	TAF1-depleted	2508	358604	358564	-40	YGL080W	3077.9	0.002298507	0.483849322	0.066087784	0.014181337	0.683683881	0.006677114	0.349933477	0.297553033	0.060459771	2	TRUE
1967	1984	YGL079W	chrVII	+	TATA-less	TAF1-enriched	697	359469	359434	-35	YGL079W	283.6	0.030859772	0.026548564	0.483646266	0.145757405	0.137106558	0.024483516	0.015786585	0.820416515	0.666025724	3	TRUE
1968	1985	YGL078C	chrVII	-	TATA-less	TAF1-enriched	750	361877	361924	-47	YGL078C	17960.3	0.059548829	NA	NA	NA	NA	NA	NA	NA	NA	NA	NA
1969	1986	ST1158	chrVII	+	TATA-less	TAF1-depleted	28	362277	362155	-122	ST1158	46.9	0.744197783	NA	NA	NA	NA	NA	NA	NA	NA	NA	NA
1970	1987	YGL077C	chrVII	-	TATA-containing	TAF1-depleted	701	NA	364040	NA	YGL077C	1500.2	0.006929711	0.058985776	0.467673894	0.459362704	0.047589745	0.893779834	0.090150944	0.55824741	0.1544169	1	TRUE
1971	1988	YGL076C	chrVII	-	TATA-less	TAF1-enriched	79800	NA	366022	NA	YGL076C	125526.6	0.000138418	0.018901237	0.11758711	0.063280622	1	0.016500453	1	1	1	2	TRUE
1972	1989	orphan	chrVII	-	TATA-less	TAF1-enriched	1148	366449	366468	-19	orphan	500.5	0.266605827	NA	NA	NA	NA	NA	NA	NA	NA	NA	NA
1973	1990	CUT140	chrVII	+	TATA-less	TAF1-depleted	0	366748	366701	-47	CUT140	9.7	0.053701062	NA	NA	NA	NA	NA	NA	NA	NA	NA	NA
1974	1991	YGL075C	chrVII	-	TATA-less	TAF1-enriched	112	368236	368298	-62	YGL075C	48.2	0.420097763	NA	NA	NA	NA	NA	NA	NA	NA	NA	NA
1975	1992	YGL073W	chrVII	+	TATA-less	TAF1-enriched	93	368739	368669	-70	YGL073W	259.7	0.00979231	0.281319165	0.044523129	0.17521913	0.555127132	0.048088489	0.196416357	0.788959013	0.257489851	2	TRUE
1976	1993	YGL072C	chrVII	-	TATA-less	TAF1-enriched	649	371195	371222	-27	YGL072C	349	0.014562905	0.749172933	0.021661962	0.053074106	0.867241609	0.141685938	0.459121413	0.405184495	0.136606212	1	TRUE
1977	1994	YGL071W	chrVII	+	TATA-less	TAF1-depleted	1233	NA	371564	NA	YGL071W	86.3	0.041632034	0.11726919	0.450751114	0.065338067	0.022150041	0.29554369	0.873768174	0.196300339	0.356805626	1	TRUE
1978	1995	YGL070C	chrVII	-	TATA-less	TAF1-enriched	603	374828	374852	-24	YGL070C	1005	0.001063172	0.136816013	0.009527556	0.029377666	0.019297024	0.069931055	0.001652086	0.002892553	0.833847154	5	TRUE
1979	1996	YGL068W	chrVII	+	TATA-less	TAF1-depleted	8445	375082	375040	-42	YGL068W	1294	0.005350967	0.059562958	0.009275353	0.050304305	0.902228004	0.305088502	0.022315167	0.045684191	0.125646716	3	TRUE
1980	1997	YGL067W	chrVII	+	TATA-less	TAF1-enriched	313	376081	375929	-152	YGL067W	371.6	0.009375202	0.023867999	0.307583699	0.654820638	0.237381783	0.127163675	0.923677935	0.695315131	0.923677935	1	TRUE
1981	1998	YGL066W	chrVII	+	TATA-less	TAF1-enriched	242	377656	377507	-149	YGL066W	520.1	0.035385578	0.381783447	0.085418613	0.993629673	0.731360336	0.828632196	0.162347877	0.062090918	0.581699971	0	FALSE
1982	1999	YGL065C	chrVII	-	TATA-less	TAF1-enriched	149	381251	381316	-65	YGL065C	1025.1	0.011660228	0.638882664	0.037310665	0.579434792	0.426513695	0.050019126	0.078574801	0.513584294	0.579434792	1	TRUE
1983	2000	YGL064C	chrVII	-	TATA-less	TAF1-enriched	215	383200	383215	-15	YGL064C	56	0.233955845	NA	NA	NA	NA	NA	NA	NA	NA	NA	NA
1984	2001	YGL063W	chrVII	+	TATA-less	TAF1-enriched	195	383635	383460	-175	YGL063W	163.6	0.042307856	0.441076147	0.023358144	0.191666209	0.566496311	0.275943174	0.355736406	0.294470209	0.151844147	1	TRUE
1985	2002	orphan	chrVII	+	TATA-less	TAF1-enriched	224	392221	392200	-21	orphan	705.5	0.000272328	0.374601911	0.086055904	0.046163752	0.427012024	0.010049984	0.22406554	0.451211677	0.14017045	2	TRUE
1986	2003	orphan	chrVII	-	TATA-less	TAF1-enriched	88	393662	393681	-19	orphan	19.7	0.306346946	NA	NA	NA	NA	NA	NA	NA	NA	NA	NA
1987	2004	YGL058W	chrVII	+	TATA-less	TAF1-enriched	744	393987	393918	-69	YGL058W	1189.4	0.006103812	0.027218767	0.012456522	0.372787824	0.251832304	0.696249918	0.181256831	0.241533284	0.483753417	2	TRUE
1988	2005	YGL057C	chrVII	-	TATA-less	TAF1-enriched	496	395789	395802	-13	YGL057C	177.3	0.059153034	NA	NA	NA	NA	NA	NA	NA	NA	NA	NA
1989	2006	YGL056C	chrVII	-	TATA-less	TAF1-depleted	7452	397658	397713	-55	YGL056C	1242.5	0.014458045	0.015126425	0.680155246	0.740920405	0.967836965	0.120847372	0.967836965	0.422760868	0.211313946	1	TRUE
1990	2007	YGL055W	chrVII	+	TATA-containing	TAF1-depleted	16505	398668	398566	-102	YGL055W	47330.2	0.002854243	0.033746956	0.600769026	0.035325014	0.605912526	0.092768254	0.605912526	0.873997965	0.016420954	3	TRUE
1991	2008	tE(UUC)G2	chrVII	+	TATA-less	-	0	NA	401640	NA	tE(UUC)G2	0	NA	NA	NA	NA	NA	NA	NA	NA	NA	NA	NA
1992	2009	YGL050W	chrVII	+	TATA-less	TAF1-enriched	426	405785	405746	-39	YGL050W	516.7	0.047144493	0.441559309	0.847436187	0.15841368	0.465676831	0.325273202	0.02634981	0.335673003	0.15841368	1	TRUE
1993	2010	YGL049C	chrVII	-	TATA-less	TAF1-enriched	1866	409719	409740	-21	YGL049C	2661.7	0.015545911	0.512272492	0.171044355	0.467946117	0.03454381	0.5165212	0.021161406	0.381436079	0.204726695	2	TRUE
1994	2011	YGL048C	chrVII	-	TATA-less	TAF1-enriched	4413	411271	411314	-43	YGL048C	4191.9	0.013171821	0.001867497	0.055308801	0.108094747	0.108094747	0.511363169	0.513092082	0.484919027	0.472371247	1	TRUE
1995	2012	orphan	chrVII	-	TATA-less	TAF1-enriched	14	412070	412105	-35	orphan	30.6	0.194506467	NA	NA	NA	NA	NA	NA	NA	NA	NA	NA
1996	2013	orphan	chrVII	-	TATA-less	TAF1-enriched	136	413507	413595	-88	orphan	4	0.110820081	NA	NA	NA	NA	NA	NA	NA	NA	NA	NA
1997	2014	YGL044C	chrVII	-	TATA-less	TAF1-enriched	89	417224	417242	-18	YGL044C	724.8	0.000541185	0.180970573	0.037583912	0.57717861	0.175750943	0.133309404	0.138503918	0.284919819	0.271727786	1	TRUE
1998	2015	YGL043W	chrVII	+	TATA-less	TAF1-enriched	576	417493	417461	-32	YGL043W	1175.7	0.073538613	NA	NA	NA	NA	NA	NA	NA	NA	NA	NA
1999	2016	YGL041W-A	chrVII	+	TATA-less	TAF1-enriched	907	418848	418809	-39	YGL041W-A	1204.6	0.012929461	0.035227291	0.976171852	0.025542381	0.712803643	0.01559438	0.77465233	0.924282031	0.09356798	3	TRUE
[truncated: 3,980 more rows]
