# Supplementary material for: Ssl2/TFIIH function in transcription start site scanning by RNA polymerase II in Saccharomyces cerevisiae
Source: eLife. 2021 Oct 15;10:e71013. doi: 10.7554/eLife.71013 (PMC8589449; doi:10.7554/eLife.71013)
Supplement: Figure 5—figure supplement 2—source data 9. [file elife-71013-fig5-figsupp2-data9.csv]

X5979_Index	X6044_Index	Gene	Chromosome	Strand	TATA_class	TAF1_status	WT_TSS_Expression_Total_reads	WT_Plus_one_nuc_position	WT_TSS_median	TSS_Plusone_nuc_distance	gene	rowtotal	MW_compiled	rpb1E1103G_vs_SSL2WT_MW_p-value	rpb1H1085Y_vs_SSL2WT_MW_p-value	ssl2D522V_vs_SSL2WT_MW_p-value	ssl2L225P_vs_SSL2WT_MW_p-value	ssl2N230D_vs_SSL2WT_MW_p-value	ssl2N230I_vs_SSL2WT_MW_p-value	ssl2R636C_vs_SSL2WT_MW_p-value	ssl2Y750_vs_SSL2WT_MW_p-value
1	1	ST3634	chrI	-	TATA-less	TAF1-enriched	0	6112	6276	-164	ST3634	12.9	NULL	0.932087071	0.439858381	0.895493084	0.693529129	0.547986032	0.357835467	0.797164177	0.792147392
2	2	ST3637	chrI	-	TATA-less	TAF1-enriched	20	29717	29744	-27	ST3637	85.7	NULL	0.146700539	0.169686101	0.065915952	0.895810367	0.394107149	0.59928633	0.797516299	0.359305232
3	3	CUT001	chrI	+	TATA-less	TAF1-depleted	33	30217	30203	-14	CUT001	213.1	NULL	0.124377909	0.201939802	1	0.895810367	0.60913007	0.895810367	1	0.59928633
4	4	CUT437	chrI	-	TATA-less	TAF1-enriched	97	30710	30844	-134	CUT437	36.3	NULL	0.727603425	0.026546198	0.044680647	1	0.143118038	0.412866955	0.727603425	0.503357576
5	5	orphan	chrI	-	TATA-less	TAF1-enriched	88	33064	33141	-77	orphan	6.8	NULL	0.148125677	0.172722365	0.691728538	0.845814839	0.441484761	0.894849724	0.39159429	0.14972246
6	6	ST3640	chrI	-	TATA-less	TAF1-enriched	314	34347	34362	-15	ST3640	179.9	NULL	0.797164177	0.440673311	0.1484791	0.507386527	1	0.357835467	0.49463363	0.048798093
7	7	orphan	chrI	+	TATA-less	TAF1-enriched	55	NA	34678	NA	orphan	26.1	NULL	0.268767553	0.551517708	0.895810367	0.792771379	0.008246738	1	0.798561763	0.512610438
8	8	CUT438	chrI	-	TATA-less	TAF1-enriched	436	NA	34738	NA	CUT438	76.2	NULL	0.551517708	0.232842047	0.691728538	0.792771379	0.348546687	0.59928633	1	0.693529129
9	9	YAL060W	chrI	+	TATA-containing	TAF1-depleted	198	35243	35071	-172	YAL060W	713.1	NULL	0.050394337	0.548699	0.895810367	0.359305232	0.007910597	0.694417686	0.863951761	0.088675943
10	10	CUT439	chrI	-	TATA-containing	TAF1-enriched	32	36322	36357	-35	CUT439	22.5	NULL	0.864900617	0.56969697	1	0.088888889	0.08830911	0.088888889	1	0.888888889
11	11	YAL058W	chrI	+	TATA-less	TAF1-enriched	12	37444	37405	-39	YAL058W	447.2	NULL	0.133675511	0.017010283	0.894523556	0.790241066	0.727121344	0.065086726	0.93148272	0.357835467
12	12	YAL056W	chrI	+	TATA-less	TAF1-enriched	844	39267	39217	-50	YAL056W	582.3	NULL	0.659135465	0.479500122	0.48620496	0.421881247	0.537638448	0.263552477	1	0.67502412
13	13	ST0010	chrI	+	TATA-less	TAF1-enriched	102	43637	43542	-95	ST0010	100.4	NULL	0.289756002	0.015313822	0.595883091	0.138408493	0.037077191	1	0.347696494	0.694417686
14	14	YAL053W	chrI	+	TATA-less	TAF1-depleted	6373	45816	45757	-59	YAL053W	1436.1	NULL	0.440673311	0.058551119	0.046730149	0.894523556	0.86249023	1	0.479500122	0.046730149
15	15	YAL051W	chrI	+	TATA-less	TAF1-enriched	252	48564	48539	-25	YAL051W	384.8	NULL	0.048783581	0.733196121	0.792771379	0.14972246	0.306482234	1	0.017026289	0.356355957
16	16	YAL049C	chrI	-	TATA-less	TAF1-enriched	1760	52586	52661	-75	YAL049C	1263.6	NULL	0.007910597	0.006842389	0.046730149	0.06260547	0.007473611	0.484695003	0.296934286	0.046730149
17	17	YAL047C	chrI	-	TATA-containing	TAF1-enriched	70	56830	56883	-53	YAL047C	134.5	NULL	0.046386593	0.030382822	0.484695003	0.657788651	0.007154342	0.657788651	0.296517172	0.57481922
18	18	YAL046C	chrI	-	TATA-containing	TAF1-enriched	258	57361	57383	-22	YAL046C	1270.6	NULL	0.013460069	0.007910597	0.359305232	0.694417686	0.172722365	0.512610438	0.669489674	0.59928633
19	19	YAL044C	chrI	-	TATA-containing	TAF1-depleted	29392	58446	58476	-30	YAL044C	3091	NULL	0.005855932	0.218758005	0.112351198	0.322843128	0.927043673	0.419740503	0.218758005	0.03605437
20	20	YAL043C	chrI	-	TATA-less	TAF1-enriched	341	61024	61072	-48	YAL043C	287.7	NULL	0.025649925	1	0.046730149	0.046730149	0.007800146	0.046044853	0.859683795	0.133293185
21	21	YAL042W	chrI	+	TATA-less	TAF1-enriched	1335	61330	61296	-34	YAL042W	6701.1	NULL	0.005393812	0.516391788	0.03605437	0.283876475	0.005393812	0.283876475	0.12002519	0.283876475
22	22	YAL041W	chrI	+	TATA-less	TAF1-enriched	9254	62807	62795	-12	YAL041W	154.2	NULL	0.140955219	1	0.058495155	0.263552477	0.248735631	0.076031041	0.286089935	0.588809187
23	24	YAL040C	chrI	-	TATA-containing	TAF1-depleted	10607	67822	67848	-26	YAL040C	1762.9	NULL	0.070479927	0.007049543	0.504711414	1	0.86123563	0.047417494	0.331829403	0.135857322
24	25	YAL039C	chrI	-	TATA-less	TAF1-enriched	466	69536	69581	-45	YAL039C	470.8	NULL	0.085507023	0.606584521	1	0.228361945	0.1627659	0.788281321	0.585769293	1
25	26	YAL038W	chrI	+	TATA-less	TAF1-depleted	270773	71853	71759	-94	YAL038W	99353.4	NULL	0.005393812	0.015172523	0.036701192	0.03605437	0.005393812	0.03605437	0.006240605	0.665005542
26	27	YAL036C	chrI	-	TATA-less	TAF1-enriched	536	76158	76187	-29	YAL036C	1463.4	NULL	0.005855932	0.00604661	0.03605437	1	0.203510603	0.03605437	0.054497048	0.57481922
27	28	YAL035W	chrI	+	TATA-less	TAF1-enriched	1787	76445	76401	-44	YAL035W	10290.1	NULL	0.002685983	0.002685983	0.015494295	0.802587349	0.005598938	0.802587349	0.595883091	0.015494295
28	29	YAL034W-A	chrI	+	TATA-less	TAF1-enriched	151	79731	79689	-42	YAL034W-A	78.3	NULL	0.133675511	0.296048012	0.081865671	0.889235607	0.120373467	0.234230702	0.724174148	0.344156576
29	30	YAL032C	chrI	-	TATA-less	TAF1-enriched	427	84456	84494	-38	YAL032C	84.9	NULL	0.797164177	0.669489674	0.14972246	0.686130413	1	0.238557044	1	0.512610438
30	31	YAL031C	chrI	-	TATA-less	TAF1-depleted	30	87027	87078	-51	YAL031C	416.6	NULL	0.001556573	0.001313653	0.004915802	0.080118314	0.001313653	0.004915802	NaN	0.080118314
31	32	YAL029C	chrI	-	TATA-less	TAF1-enriched	526	92441	92486	-45	YAL029C	277.9	NULL	0.185728553	0.017219911	0.327935987	0.768624792	0.183229817	0.676082741	1	0.872382973
32	33	YAL028W	chrI	+	TATA-less	TAF1-enriched	40	92902	92885	-17	YAL028W	362.4	NULL	0.329076491	0.686075935	0.889235607	0.872382973	0.062430421	0.03605437	0.924226868	0.889235607
33	34	YAL027W	chrI	+	TATA-containing	TAF1-enriched	55	94664	94625	-39	YAL027W	190.3	NULL	0.522396205	0.389912585	0.776814004	0.09467072	0.927191096	0.403363637	0.354914141	0.039979603
34	35	YAL026C	chrI	-	TATA-less	TAF1-enriched	2957	99727	99778	-51	YAL026C	757.7	NULL	0.020487551	0.605940351	0.888854163	0.28733307	0.724671978	0.342584628	0.861489297	0.046730149
35	36	YAL025C	chrI	-	TATA-less	TAF1-enriched	246	101137	101170	-33	YAL025C	234	NULL	0.003261123	0.002685983	1	0.136037128	0.011821138	0.015975041	0.312272539	0.07723562
36	37	YAL024C	chrI	-	TATA-less	TAF1-enriched	1199	105930	105969	-39	YAL024C	184.4	NULL	0.020038949	0.031901272	0.28733307	0.06260547	0.014577797	0.06260547	0.727121344	0.690816272
37	38	YAL023C	chrI	-	TATA-less	TAF1-enriched	16797	108595	108632	-37	YAL023C	5979.2	NULL	0.003193895	0.003261123	0.015494295	0.033368235	0.002685983	0.015975041	0.595883091	0.015975041
38	39	YAL022C	chrI	-	TATA-less	TAF1-enriched	1901	110405	110446	-41	YAL022C	2351.3	NULL	1	0.797516299	0.685167447	0.137134544	0.659135465	0.137134544	0.492330692	0.685167447
39	40	YAL021C	chrI	-	TATA-less	TAF1-enriched	11944	113357	113406	-49	YAL021C	3308.8	NULL	0.001556573	0.001688186	0.004915802	0.005188608	0.435236127	0.005188608	0.001643552	NaN
40	41	YAL020C	chrI	-	TATA-less	TAF1-depleted	452	114589	114619	-30	YAL020C	673.8	NULL	0.121711196	0.030081867	0.503357576	1	0.097408871	0.353367292	0.524071423	0.484695003
41	42	YAL019W	chrI	+	TATA-less	TAF1-enriched	1693	114841	114803	-38	YAL019W	219.5	NULL	0.300448558	0.007581651	0.046730149	0.145981945	0.008021847	0.085758003	0.16585666	0.046730149
42	43	YAL014C	chrI	-	TATA-less	TAF1-enriched	493	129003	129067	-64	YAL014C	1437.8	NULL	0.006437908	0.06889442	0.04332537	0.20208631	0.006437908	0.20208631	0.044408231	0.100348246
43	44	YAL013W	chrI	+	TATA-less	TAF1-enriched	151	129291	129236	-55	YAL013W	201.1	NULL	0.049185351	0.006945558	1	1	0.049185351	0.787615767	0.665005542	1
44	45	YAL012W	chrI	+	TATA-less	TAF1-depleted	52312	130828	130735	-93	YAL012W	13165.8	NULL	0.007690497	0.007049543	0.047417494	0.692632784	0.192305942	1	0.607225552	0.354866599
45	46	YAL011W	chrI	+	TATA-less	TAF1-enriched	313	131983	131969	-14	YAL011W	250	NULL	0.864665265	0.394107149	0.293325574	0.512610438	0.443898466	0.895810367	0.551517708	0.049491231
46	47	YAL010C	chrI	-	TATA-less	TAF1-enriched	354	135652	135688	-36	YAL010C	487.7	NULL	0.185728553	0.042839137	0.329609605	0.665005542	0.322525783	0.036701192	0.787717012	1
47	48	YAL008W	chrI	+	TATA-less	TAF1-enriched	233	136925	136866	-59	YAL008W	452.2	NULL	0.008246738	0.008246738	0.085758003	0.512610438	0.436563363	0.049491231	0.441484761	1
48	49	YAL007C	chrI	-	TATA-less	TAF1-enriched	1258	138389	138430	-41	YAL007C	1915.5	NULL	0.862242032	0.547986032	0.792147392	0.232774339	0.330915337	0.598161453	1	0.147232255
49	50	tP(UGG)A	chrI	-	TATA-containing	-	3	139260	139314	-54	tP(UGG)A	47.4	NULL	0.033441628	0.268767553	0.895810367	0.512610438	0.349393711	0.238557044	0.932206034	0.694417686
50	51	YAL005C	chrI	-	TATA-containing	TAF1-depleted	794	141409	141493	-84	YAL005C	12345.5	NULL	0.003329187	0.003193895	0.015975041	0.015975041	0.823063274	0.015494295	0.146100466	0.015975041
51	52	YAL003W	chrI	+	TATA-less	TAF1-depleted	117436	142199	142153	-46	YAL003W	50356.6	NULL	0.001556573	0.049238968	0.004915802	NaN	0.001313653	NaN	NaN	0.005188608
52	53	YAL002W	chrI	+	TATA-less	TAF1-enriched	895	143680	143630	-50	YAL002W	296.3	NULL	0.797866593	0.063431425	0.894194334	0.135857322	0.007690497	0.135857322	0.432363287	0.894194334
53	54	orphan	chrI	-	TATA-less	TAF1-enriched	94	151145	151192	-47	orphan	655.7	NULL	0.002685983	0.128066265	0.015975041	0.015494295	0.775867448	0.015494295	0.058102437	0.136037128
54	55	CUT441	chrI	-	TATA-less	TAF1-enriched	9	151837	151964	-127	CUT441	86.7	NULL	0.480330338	0.069469265	0.04332537	0.104870291	0.06443412	0.138408493	0.790882323	0.329609605
55	56	YAR002W	chrI	+	TATA-less	TAF1-enriched	5329	152259	152215	-44	YAR002W	200.1	NULL	0.121711196	0.193119366	0.291840545	0.507386527	0.602671521	1	0.669489674	0.790241066
56	57	YAR002C-A	chrI	-	TATA-less	TAF1-enriched	1138	154726	154740	-14	YAR002C-A	1047.9	NULL	0.929568022	0.006143194	0.673955067	1	0.528994074	0.484695003	0.715823013	0.673955067
57	58	YAR003W	chrI	+	TATA-containing	TAF1-enriched	76	154989	154955	-34	YAR003W	121.5	NULL	0.183966819	0.003261123	1	0.015975041	0.154578895	0.015975041	0.147320903	0.015975041
58	59	YAR007C	chrI	-	TATA-less	TAF1-enriched	492	158638	158678	-40	YAR007C	357.9	NULL	0.221099264	0.221953283	0.135857322	0.041979528	0.023827529	0.041979528	0.016387834	0.075059873
59	60	tA(UGC)A	chrI	+	TATA-less	-	704	166463	166366	-97	tA(UGC)A	11.8	NULL	0.123311259	0.924556048	0.138408493	0.659023837	0.332739927	0.659023837	0.479364203	0.659023837
60	61	YAR014C	chrI	-	TATA-less	TAF1-enriched	89	168977	168980	-3	YAR014C	602.6	NULL	0.549408625	0.008360374	0.177777778	0.533333333	0.028282828	0.895493084	0.201147528	0.085758003
61	62	YAR015W	chrI	+	TATA-containing	TAF1-depleted	973	169311	169286	-25	YAR015W	5662.8	NULL	0.001688186	0.215924939	0.004915802	0.080118314	0.001313653	NaN	0.215924939	0.005188608
62	63	YAR018C	chrI	-	TATA-less	TAF1-enriched	306	171693	171711	-18	YAR018C	378.3	NULL	0.547269697	0.032207629	0.143471009	0.888854163	0.044802434	0.888854163	0.412726254	0.143471009
63	64	YAR019C	chrI	-	TATA-less	TAF1-enriched	719	175121	175164	-43	YAR019C	168.3	NULL	0.668385514	0.796096689	0.426325543	0.228361945	0.163540852	0.691728538	0.117016849	0.508708087
64	65	tL(CAA)A	chrI	+	TATA-less	-	0	181136	181100	-36	tL(CAA)A	1	NULL	0.809149835	0.055008834	0.809149835	0.468716582	0.139996284	0.488422317	0.662427485	0.751829634
65	66	orphan	chrI	+	TATA-less	TAF1-enriched	127	181571	181446	-125	orphan	30.5	NULL	0.072504128	0.199557256	0.691728538	0.047417494	0.012972764	0.145981945	0.049185351	0.691728538
66	67	tS(AGA)A	chrI	-	TATA-less	-	36	182406	182506	-100	tS(AGA)A	17	NULL	0.434894327	0.145986278	0.691728538	0.184897599	0.729506525	0.894849724	0.119703534	0.787615767
67	68	orphan	chrI	+	TATA-less	TAF1-enriched	1	184719	184634	-85	orphan	17.1	NULL	0.808080808	0.016161616	0.888888889	1	0.214141414	0.044444444	0.460606061	0.14972246
68	69	YAR028W	chrI	+	TATA-less	TAF1-enriched	3102	184885	184869	-16	YAR028W	998.9	NULL	0.649722629	0.035577182	0.576150122	0.746885633	0.479364203	0.629879079	0.064284866	0.576150122
69	70	YAR033W	chrI	+	TATA-less	TAF1-enriched	483	NA	188045	NA	YAR033W	104.7	NULL	0.010808775	0.853213423	0.265205393	0.470486422	0.075980263	0.132006336	0.266947566	0.265205393
70	71	YAR042W	chrI	+	TATA-less	TAF1-enriched	1288	192634	192595	-39	YAR042W	362.8	NULL	0.780929882	0.005855932	0.767755389	0.035410671	0.130734222	0.069246941	0.02741654	0.035410671
71	72	ST0047	chrI	+	TATA-less	TAF1-enriched	63	198972	198923	-49	ST0047	25.5	NULL	0.394014618	0.254668583	0.056006607	0.767810014	1	0.883132978	0.107395172	0.659215631
72	73	orphan	chrI	+	TATA-less	TAF1-enriched	563	200666	200620	-46	orphan	219.7	NULL	0.013624302	0.859946052	0.088675943	0.790882323	0.008360374	0.59928633	0.049587742	0.512610438
73	74	orphan	chrI	+	TATA-containing	TAF1-enriched	0	NA	223048	NA	orphan	0.3	NULL	NA	NaN	1	NA	NA	NaN	NaN	NA
74	75	YAR073W	chrI	+	TATA-containing	TAF1-depleted	85	227528	227496	-32	YAR073W	9.1	NULL	0.339899051	1	0.083811901	0.684195574	0.063431425	0.504711414	0.667829275	0.347268461
75	76	tL(UAA)B1	chrII	+	TATA-less	-	27	9602	9572	-30	tL(UAA)B1	29.4	NULL	0.64707823	0.789711992	0.684195574	0.786265613	1	0.684195574	0.193119366	0.786265613
76	77	YBL107C	chrII	-	TATA-containing	TAF1-enriched	709	10487	10551	-64	YBL107C	389.6	NULL	0.013460069	0.201147528	0.354866599	0.512610438	0.145270893	0.359305232	1	0.048798093
77	78	YBL105C	chrII	-	TATA-less	TAF1-enriched	486	17903	17938	-35	YBL105C	208.7	NULL	0.197959327	0.082703863	1	0.685167447	1	0.685167447	0.546549968	1
78	79	YBL104C	chrII	-	TATA-less	TAF1-enriched	42	21267	21313	-46	YBL104C	269.6	NULL	0.299574583	0.049990741	0.234230702	0.533333333	0.094316816	0.357835467	0.125706788	0.234230702
79	80	YBL103C	chrII	-	TATA-less	TAF1-enriched	150	23738	23774	-36	YBL103C	390.9	NULL	0.776342228	0.045989475	0.076031041	0.494997202	0.015372288	0.104870291	0.929700693	0.576150122
80	81	YBL102W	chrII	+	TATA-less	TAF1-depleted	7231	24044	23992	-52	YBL102W	2724.7	NULL	0.363722327	0.006143194	0.421881247	0.036701192	0.220150713	0.03605437	0.006240605	0.421881247
81	82	YBL100W-C	chrII	+	TATA-less	TAF1-enriched	21	28361	28298	-63	YBL100W-C	17.2	NULL	0.268767553	0.148125677	0.792771379	0.430614455	0.864665265	0.792771379	0.797164177	0.792771379
82	83	tF(GAA)B	chrII	-	TATA-less	-	34	NA	36234	NA	tF(GAA)B	42	NULL	0.16585666	0.086067568	0.049491231	0.359305232	0.930861941	1	1	0.894523556
83	84	YBL099W	chrII	+	TATA-less	TAF1-enriched	18812	36771	36744	-27	YBL099W	8636.2	NULL	0.007910597	0.007049543	0.082838773	0.047417494	0.014943839	0.082838773	0.007049543	0.082838773
84	85	YBL097W	chrII	+	TATA-less	TAF1-enriched	20	40807	40775	-32	YBL097W	29.6	NULL	0.668385514	1	0.894849724	0.894523556	0.551517708	0.59928633	0.39159429	0.359305232
85	86	YBL095W	chrII	+	TATA-less	TAF1-enriched	143	43314	43267	-47	YBL095W	147.4	NULL	0.495394415	0.021625614	0.430614455	0.430614455	0.169686101	0.14972246	0.050394337	0.238557044
86	87	YBL093C	chrII	-	TATA-less	TAF1-enriched	275	44973	44998	-25	YBL093C	1092.7	NULL	0.345126713	0.007800146	0.222376248	0.690816272	0.606584521	0.046730149	0.083825171	0.142210424
87	88	YBL092W	chrII	+	TATA-less	TAF1-enriched	52404	45656	45613	-43	YBL092W	57143.5	NULL	0.001643552	0.001313653	0.080118314	0.080118314	NaN	NaN	NaN	NaN
88	89	YBL091C-A	chrII	-	TATA-containing	TAF1-enriched	190	47154	47193	-39	YBL091C-A	240.6	NULL	0.143118038	0.439039945	0.692632784	0.342584628	0.007690497	1	0.789711992	0.692632784
89	90	YBL090W	chrII	+	TATA-less	TAF1-enriched	1881	48844	48794	-50	YBL090W	369.1	NULL	0.007581651	0.026258184	0.28274546	0.49356279	0.007581651	0.49356279	0.929300411	0.044001861
90	91	YBL088C	chrII	-	TATA-less	TAF1-enriched	17	NA	59837	NA	YBL088C	67.2	NULL	0.932206034	0.443898466	0.895810367	0.512610438	0.021625614	0.512610438	0.670582894	0.512610438
91	92	YBL087C	chrII	-	TATA-less	TAF1-enriched	6036	60767	60773	-6	YBL087C	22978.4	NULL	0.006338844	0.063932568	0.141326003	0.03605437	0.220150713	0.03605437	0.005950856	0.036701192
92	93	YBL085W	chrII	+	TATA-less	TAF1-enriched	158	63716	63685	-31	YBL085W	491.3	NULL	0.367676768	0.028282828	0.711111111	0.4	0.201939802	0.4	0.072727273	0.359305232
93	94	YBL084C	chrII	-	TATA-less	TAF1-enriched	792	NA	69533	NA	YBL084C	289.1	NULL	0.008865958	0.007259955	0.779854618	0.076031041	0.013680226	0.104870291	0.855850327	1
94	95	YBL082C	chrII	-	TATA-less	TAF1-enriched	593	71104	71163	-59	YBL082C	919.6	NULL	0.047182916	0.039064406	0.046730149	1	0.025649925	0.503357576	0.929700693	0.279641534
95	96	YBL081W	chrII	+	TATA-less	TAF1-enriched	1265	71610	71552	-58	YBL081W	471.4	NULL	0.796454389	0.007690497	0.231310785	0.784191229	1	0.132006336	0.182392986	0.68122512
96	97	YBL080C	chrII	-	TATA-less	TAF1-enriched	186	74714	74736	-22	YBL080C	93.8	NULL	0.008360374	0.267082584	0.345717816	0.694417686	0.086628059	0.508708087	0.261101437	1
97	98	orphan	chrII	+	TATA-less	TAF1-enriched	0	74978	74972	-6	orphan	6.9	NULL	0.013624302	0.040828988	0.177777778	1	0.016161616	0.888888889	0.367676768	0.888888889
98	99	YBL079W	chrII	+	TATA-less	TAF1-enriched	817	75247	75196	-51	YBL079W	1642.3	NULL	0.006842389	0.221099264	0.039979603	0.295641821	0.005950856	0.411313792	0.253215109	0.039979603
99	100	YBL078C	chrII	-	TATA-less	TAF1-enriched	223	80736	80752	-16	YBL078C	1516.3	NULL	0.100493741	0.250535974	0.046044853	0.68989587	0.007366379	0.045361665	0.250535974	0.045361665
100	101	YBL076C	chrII	-	TATA-less	TAF1-enriched	2496	84250	84287	-37	YBL076C	7043.4	NULL	0.001733589	0.001556573	0.005188608	NaN	0.001688186	NaN	NaN	0.004915802
101	102	YBL074C	chrII	-	TATA-less	TAF1-enriched	84	87776	87790	-14	YBL074C	207.8	NULL	0.153535354	0.214141414	0.088888889	0.06674615	0.008080808	0.085758003	0.010570734	0.044444444
102	103	YBL072C	chrII	-	TATA-less	TAF1-enriched	922	89430	89501	-71	YBL072C	5028.2	NULL	0.091838902	0.006338844	0.03605437	0.050399283	0.006240605	0.036701192	0.929165456	0.036701192
103	104	YBL071W-A	chrII	+	TATA-less	TAF1-enriched	295	89992	89943	-49	YBL071W-A	808.6	NULL	0.143118038	0.007366379	0.044680647	0.107123399	0.007473611	0.044680647	0.409891343	0.044001861
104	105	YBL069W	chrII	+	TATA-containing	TAF1-enriched	1612	90717	90694	-23	YBL069W	899.7	NULL	0.086067568	0.006842389	0.084784996	0.417455426	0.007800146	0.046730149	0.116343478	0.084784996
105	106	YBL068W	chrII	+	TATA-less	TAF1-enriched	619	92417	92357	-60	YBL068W	229.2	NULL	0.929165456	0.063431425	1	0.767755389	0.316764504	0.208468351	0.296517172	1
106	107	YBL067C	chrII	-	TATA-less	TAF1-enriched	265	96093	96109	-16	YBL067C	789.8	NULL	1	0.441484761	0.894849724	0.690816272	0.607225552	1	1	0.418961725
107	108	orphan	chrII	-	TATA-containing	TAF1-enriched	91	100118	100156	-38	orphan	63.4	NULL	0.138782557	0.074024444	0.048798093	0.894523556	0.02770872	0.894523556	0.488422317	0.138408493
108	109	YBL064C	chrII	-	TATA-containing	TAF1-depleted	1090	101160	101188	-28	YBL064C	4574.9	NULL	0.01012654	0.001733589	0.005188608	0.004915802	0.001313653	0.005188608	0.050186187	0.004915802
109	110	YBL063W	chrII	+	TATA-less	TAF1-enriched	1253	101912	101877	-35	YBL063W	25.9	NULL	0.046719008	0.029387286	1	0.056006607	1	0.056006607	1	0.185839008
110	111	YBL061C	chrII	-	TATA-less	TAF1-enriched	247	107453	107506	-53	YBL061C	593.1	NULL	1	0.931112271	0.68989587	0.68989587	0.797164177	1	0.602671521	0.68989587
111	112	YBL059W	chrII	+	TATA-less	TAF1-depleted	1398	110729	110700	-29	YBL059W	833.9	NULL	0.049990741	0.010030543	0.234230702	0.048798093	0.056746816	0.049491231	0.345986525	0.232774339
112	113	orphan	chrII	-	TATA-less	TAF1-enriched	207	111179	111201	-22	orphan	14.8	NULL	0.201939802	0.060816949	0.430614455	0.065915952	0.733196121	0.59928633	0.733196121	0.895810367
113	114	YBL058W	chrII	+	TATA-containing	TAF1-enriched	3535	111457	111409	-48	YBL058W	932.5	NULL	0.001643552	0.001556573	NaN	NaN	NaN	0.004915802	0.049238968	NaN
114	115	YBL057C	chrII	-	TATA-less	TAF1-enriched	996	113396	113442	-46	YBL057C	968.9	NULL	0.011408183	0.007259955	1	0.176565351	1	1	1	0.48620496
115	116	YBL056W	chrII	+	TATA-less	TAF1-enriched	806	113695	113654	-41	YBL056W	2267.9	NULL	0.731830274	0.004040404	1	0.044444444	0.544370146	0.711111111	0.798215076	0.895493084
116	117	YBL055C	chrII	-	TATA-less	TAF1-depleted	814	116669	116815	-146	YBL055C	793.6	NULL	0.039064406	0.122378978	0.232774339	0.104870291	0.228700567	0.232774339	0.547986032	0.232774339
117	118	YBL054W	chrII	+	TATA-less	TAF1-enriched	3302	117634	117478	-156	YBL054W	204.1	NULL	0.232018345	0.007259955	0.792771379	0.359305232	0.733196121	0.238557044	0.232018345	0.049491231
118	119	YBL051C	chrII	-	TATA-less	TAF1-enriched	2290	124784	124822	-38	YBL051C	2563	NULL	1	1	1	0.040643643	0.659135465	0.039979603	0.138782557	0.339408154
119	120	YBL050W	chrII	+	TATA-less	TAF1-enriched	4033	125087	125042	-45	YBL050W	955.3	NULL	0.071491579	0.085507023	0.046730149	0.226876582	0.102955624	0.06260547	0.137328714	0.232774339
120	121	ST3710	chrII	-	TATA-less	TAF1-enriched	36	127363	127512	-149	ST3710	175	NULL	0.008360374	0.08830911	0.238557044	0.049491231	0.550817954	0.049491231	0.394107149	0.14972246
121	122	YBL047C	chrII	-	TATA-less	TAF1-enriched	233	132164	132196	-32	YBL047C	4466.2	NULL	0.029053086	0.003261123	0.07723562	0.015975041	0.010563982	0.015975041	0.312272539	0.052807511
122	123	YBL046W	chrII	+	TATA-less	TAF1-enriched	94	132473	132413	-60	YBL046W	380.5	NULL	0.139507864	0.006437908	0.044001861	0.20208631	0.192305942	0.67502412	0.368468303	0.128127096
123	124	YBL045C	chrII	-	TATA-less	TAF1-enriched	2521	135679	135702	-23	YBL045C	1906.1	NULL	0.086067568	0.668385514	0.143471009	0.105997548	0.196353718	0.105997548	0.862242032	0.691728538
124	125	YBL042C	chrII	-	TATA-containing	TAF1-depleted	154	140319	140326	-7	YBL042C	807.2	NULL	0.218758005	0.006240605	0.120288243	0.120288243	0.683091398	0.139793337	0.143721735	1
125	126	YBL041W	chrII	+	TATA-less	TAF1-enriched	8168	141261	141225	-36	YBL041W	3180.3	NULL	0.007154342	0.930987447	0.357835467	0.357835467	0.04838244	0.894523556	0.797866593	1
126	127	YBL040C	chrII	-	TATA-less	TAF1-enriched	830	142845	142900	-55	YBL040C	546.4	NULL	0.057197149	0.549408625	0.234230702	0.432023291	0.094316816	0.049491231	0.495394415	0.793389781
127	128	YBL039W-B	chrII	+	TATA-less	TAF1-enriched	30	NA	143183	NA	YBL039W-B	262.1	NULL	0.19875925	0.438217981	0.354866599	0.354866599	0.199557256	0.081865671	0.266236144	0.354866599
128	129	YBL039C	chrII	-	TATA-less	TAF1-enriched	180	145752	145782	-30	YBL039C	7600.6	NULL	0.021556267	0.005393812	0.036701192	0.327935987	0.005950856	0.327935987	0.093697659	0.036701192
129	130	YBL038W	chrII	+	TATA-less	TAF1-enriched	5178	146169	146124	-45	YBL038W	1148.8	NULL	0.001313653	0.001313653	0.004915802	NaN	1	NaN	NaN	0.004915802
130	131	YBL037W	chrII	+	TATA-less	TAF1-depleted	169	147118	147126	8	YBL037W	587.8	NULL	0.007800146	0.007800146	0.046730149	0.06260547	0.007473611	0.046730149	0.025649925	0.046044853
131	132	YBL036C	chrII	-	TATA-less	TAF1-enriched	780	151195	151236	-41	YBL036C	1733.8	NULL	0.006842389	0.006240605	1	0.301326595	0.011408183	0.301326595	0.389912585	0.676082741
132	133	YBL035C	chrII	-	TATA-containing	TAF1-enriched	50	153636	153688	-52	YBL035C	635.3	NULL	0.007366379	0.054950766	0.125525756	0.125525756	0.129595844	0.04332537	0.719568783	0.04332537
133	134	YBL034C	chrII	-	TATA-less	TAF1-depleted	391	158427	158464	-37	YBL034C	152.4	NULL	0.007154342	0.728559975	0.042651237	1	0.088116673	0.041979528	0.533768205	0.671784971
134	135	YBL033C	chrII	-	TATA-containing	TAF1-enriched	2013	159678	159721	-43	YBL033C	1614.5	NULL	0.001556573	0.001313653	0.004915802	NaN	0.001556573	NaN	0.001643552	0.004915802
135	136	YBL032W	chrII	+	TATA-less	TAF1-enriched	9884	160147	160094	-53	YBL032W	490.5	NULL	0.004782003	0.046265852	0.026183688	0.623433341	0.004532406	0.623433341	0.146100466	0.092176992
136	137	YBL031W	chrII	+	TATA-less	TAF1-enriched	355	161724	161669	-55	YBL031W	716.7	NULL	0.011560425	0.045989475	0.04332537	0.676082741	0.006945558	0.138408493	0.467448917	0.892845929
137	138	YBL030C	chrII	-	TATA-containing	TAF1-depleted	79034	164107	164125	-18	YBL030C	11259.1	NULL	0.001688186	1	0.005188608	NaN	0.001643552	NaN	0.049238968	0.005188608
138	139	YBL029C-A	chrII	-	TATA-less	TAF1-depleted	444	164688	164811	-123	YBL029C-A	1111.3	NULL	0.931236421	0.930735748	0.231310785	0.894194334	0.047981942	1	0.434894327	0.894194334
139	140	YBL029W	chrII	+	TATA-containing	TAF1-depleted	100	166224	166098	-126	YBL029W	36.1	NULL	0.028282828	0.682828283	0.888888889	0.4	0.125706788	0.888888889	0.201939802	0.088888889
140	141	ST3723	chrII	-	TATA-less	TAF1-enriched	28	166853	166954	-101	ST3723	311.6	NULL	0.071997747	0.929300411	0.786943898	1	0.030987496	0.682224553	0.143118038	0.351857931
141	142	YBL028C	chrII	-	TATA-less	TAF1-enriched	175	167808	167890	-82	YBL028C	4023.3	NULL	0.008049086	0.004133256	0.02677094	0.332921608	0.004614763	0.332921608	0.435236127	0.02677094
142	143	YBL027W	chrII	+	TATA-less	TAF1-depleted	18516	168595	168392	-203	YBL027W	12992.1	NULL	0.001688186	NaN	0.004915802	0.005188608	NaN	0.005188608	0.001643552	0.005188608
143	144	ST3726	chrII	-	TATA-less	TAF1-enriched	18	170358	170387	-29	ST3726	16.1	NULL	0.932206034	0.670582894	0.088675943	0.694417686	0.268767553	0.694417686	0.864665265	0.694417686
144	145	YBL026W	chrII	+	TATA-less	TAF1-enriched	628	NA	170558	NA	YBL026W	2467.1	NULL	0.056297	0.507411142	0.684195574	0.303193256	0.427199637	0.219338776	0.724671978	0.891444622
145	146	YBL025W	chrII	+	TATA-less	TAF1-enriched	405	NA	171433	NA	YBL025W	226.7	NULL	0.008360374	0.046386593	0.049491231	0.430614455	0.008246738	0.088675943	0.125042727	0.049491231
146	147	YBL024W	chrII	+	TATA-less	TAF1-enriched	994	172551	172509	-42	YBL024W	5752.4	NULL	0.007910597	0.008021847	0.288844366	1	0.790104282	1	0.390749904	0.105997548
147	148	YBL021C	chrII	-	TATA-less	TAF1-enriched	371	182071	182118	-47	YBL021C	317.2	NULL	0.007154342	0.340778614	1	1	1	0.327935987	0.785246408	1
148	149	YBL020W	chrII	+	TATA-less	TAF1-enriched	219	182347	182320	-27	YBL020W	1482.4	NULL	0.65669965	0.00503917	0.135166272	0.177015983	0.005855932	0.034132951	0.766230334	0.413176151
149	150	YBL018C	chrII	-	TATA-less	TAF1-enriched	303	186457	186504	-47	YBL018C	616.8	NULL	0.048783581	0.008246738	0.691728538	0.049491231	0.544370146	0.049491231	0.794646803	1
150	151	YBL017C	chrII	-	TATA-less	TAF1-enriched	599	191553	191678	-125	YBL017C	605	NULL	0.074024444	0.008246738	0.894849724	0.694417686	0.148125677	0.048798093	0.493101793	0.049491231
151	152	YBL016W	chrII	+	TATA-containing	TAF1-depleted	226	192555	192369	-186	YBL016W	410	NULL	0.931236421	0.015500277	0.507386527	0.688030163	0.071491579	0.046730149	0.032207629	0.104870291
152	153	YBL015W	chrII	+	TATA-containing	TAF1-depleted	1746	194303	194033	-270	YBL015W	265.4	NULL	0.864428679	0.106024499	0.049491231	0.430614455	0.008360374	1	0.196353718	0.049491231
153	154	YBL014C	chrII	-	TATA-less	TAF1-enriched	47	201730	201777	-47	YBL014C	355.2	NULL	0.796096689	0.196353718	0.892500695	0.354866599	0.492330692	0.354866599	0.930481276	0.595883091
154	155	YBL013W	chrII	+	TATA-less	TAF1-enriched	197	202035	202036	1	YBL013W	77.3	NULL	0.006240605	0.200787142	0.210044337	0.556298461	0.289756002	0.779854618	0.413662403	0.48620496
155	156	YBL011W	chrII	+	TATA-less	TAF1-enriched	1065	203511	203445	-66	YBL011W	1601.4	NULL	0.931236421	0.120373467	0.208468351	0.339408154	0.07136402	0.339408154	0.172197819	0.208468351
156	157	YBL010C	chrII	-	TATA-less	TAF1-enriched	22	206911	206951	-40	YBL010C	128.2	NULL	0.010030543	0.331829403	0.49783023	0.14094646	0.221953283	0.417455426	0.424565545	0.894523556
157	158	YBL009W	chrII	+	TATA-less	TAF1-enriched	330	207210	207159	-51	YBL009W	179.5	NULL	0.144554389	0.007910597	0.792771379	0.59928633	0.124377909	0.691728538	0.017026289	0.895810367
158	159	YBL008W	chrII	+	TATA-less	TAF1-enriched	31	209636	209598	-38	YBL008W	89	NULL	0.214141414	0.307332348	0.432023291	0.600401848	0.864900617	0.895493084	0.349393711	0.4
159	160	YBL007C	chrII	-	TATA-containing	TAF1-enriched	311	216362	216415	-53	YBL007C	2871.7	NULL	0.0040752	0.003193895	0.263552477	0.802587349	0.002685983	1	0.026214243	0.802587349
160	161	YBL006C	chrII	-	TATA-less	TAF1-enriched	678	217097	217150	-53	YBL006C	1563.9	NULL	0.041670768	0.006240605	0.065390823	0.419740503	0.099317849	0.035410671	0.046265852	0.656539969
161	162	YBL005W	chrII	+	TATA-less	TAF1-enriched	827	217562	217555	-7	YBL005W	290.6	NULL	0.715823013	0.006240605	0.035410671	0.03605437	0.145340804	0.049601028	0.025400593	0.419740503
162	163	orphan	chrII	-	TATA-less	TAF1-enriched	245	220917	220982	-65	orphan	240.8	NULL	0.367676768	1	0.06674615	0.237122014	0.496151813	1	0.864900617	0.600401848
163	164	tS(AGA)B	chrII	+	TATA-less	-	28	227282	227202	-80	tS(AGA)B	39.4	NULL	0.541414544	0.928478896	0.671784971	1	0.711352829	0.470486422	0.286844064	0.671784971
164	165	YBL004W	chrII	+	TATA-less	TAF1-enriched	210	227580	227522	-58	YBL004W	2265.3	NULL	0.004866885	0.004866885	0.02677094	0.052107267	0.004782003	0.02677094	0.358326467	0.026183688
165	166	YBL003C	chrII	-	TATA-containing	TAF1-depleted	2179	235757	235846	-89	YBL003C	11619	NULL	0.099877403	0.006842389	0.499229169	0.888854163	0.068459684	0.888854163	0.393035392	0.042651237
166	167	ST3737	chrII	-	TATA-less	TAF1-enriched	25	235920	235996	-76	ST3737	8032.5	NULL	0.438217981	0.024343384	0.787615767	0.508708087	0.931726391	0.787615767	0.297569609	0.223883771
167	168	YBL002W	chrII	+	TATA-containing	TAF1-depleted	29896	236541	236458	-83	YBL002W	5701.3	NULL	0.129595844	0.001688186	0.004915802	0.080118314	1	NaN	0.215924939	0.005188608
168	169	ST0101	chrII	+	TATA-less	TAF1-enriched	60	NA	238527	NA	ST0101	26.9	NULL	0.266236144	0.797164177	0.895810367	0.359305232	0.670037641	0.088675943	0.551517708	0.895810367
169	170	YBR001C	chrII	-	TATA-containing	TAF1-depleted	39	241189	241415	-226	YBR001C	426.5	NULL	0.173058229	0.004782003	0.02677094	0.146399099	0.004866885	0.573775404	0.05367389	0.02677094
170	171	YBR002C	chrII	-	TATA-less	TAF1-enriched	109	242541	242588	-47	YBR002C	724.5	NULL	0.001556573	0.001313653	0.005188608	0.005188608	0.001688186	NaN	NaN	0.080118314
171	172	YBR003W	chrII	+	TATA-less	TAF1-enriched	705	242830	242780	-50	YBR003W	232.2	NULL	0.046742883	1	1	1	0.927191096	0.260832152	1	0.052107267
172	173	YBR005W	chrII	+	TATA-less	TAF1-depleted	929	245894	245859	-35	YBR005W	5359.9	NULL	0.004532406	0.004782003	0.026183688	0.573775404	0.004055953	0.573775404	0.910979293	0.02677094
173	174	ST3742	chrII	-	TATA-containing	TAF1-enriched	131	248461	248558	-97	ST3742	42.3	NULL	0.098026461	0.657313488	0.891444622	0.403363637	0.542158797	0.322843128	0.719568783	0.480085003
174	175	YBR007C	chrII	-	TATA-less	TAF1-depleted	94	250937	250975	-38	YBR007C	187.8	NULL	0.147413673	0.105411524	0.044444444	0.266666667	0.153535354	0.294801992	0.933333333	0.177777778
175	176	YBR008C	chrII	-	TATA-less	TAF1-enriched	71	254381	254427	-46	YBR008C	300.5	NULL	0.261963952	0.012493644	0.594729336	0.046044853	0.547269697	0.046730149	0.011867751	1
176	177	CUT009	chrII	+	TATA-containing	TAF1-depleted	158	254872	254792	-80	CUT009	67.3	NULL	0.106024499	0.551517708	0.694417686	0.088675943	1	0.694417686	1	0.693529129
177	178	YBR009C	chrII	-	TATA-containing	TAF1-depleted	2223	255665	255721	-56	YBR009C	15174.2	NULL	0.003061939	0.683091398	0.015975041	0.802587349	0.002685983	0.802587349	0.595883091	0.015494295
178	179	orphan	chrII	+	TATA-less	TAF1-enriched	35	256148	256102	-46	orphan	32.5	NULL	0.933333333	1	0.793389781	0.888888889	0.609758799	0.888888889	0.460606061	0.600401848
179	180	YBR010W	chrII	+	TATA-containing	TAF1-depleted	7747	256369	256303	-66	YBR010W	7630.2	NULL	0.375853451	0.006740038	0.061780727	0.103741678	0.009765619	0.206884586	0.026835268	0.046044853
180	181	YBR011C	chrII	-	TATA-less	TAF1-enriched	30377	257978	258014	-36	YBR011C	10064.4	NULL	0.032207629	0.169686101	0.893526535	0.047417494	0.790104282	0.047417494	0.862242032	1
181	182	orphan	chrII	-	TATA-less	TAF1-enriched	2	258136	258198	-62	orphan	43.7	NULL	0.119703534	0.008021847	0.892500695	0.889235607	0.790104282	0.889235607	0.776342228	0.892500695
182	183	YBR014C	chrII	-	TATA-less	TAF1-depleted	133	267202	267396	-194	YBR014C	1240.8	NULL	0.005950856	0.00503917	1	0.413176151	0.923724918	1	0.214542019	0.413176151
183	184	YBR015C	chrII	-	TATA-less	TAF1-enriched	1789	269566	269599	-33	YBR015C	1053.7	NULL	0.170447443	0.007690497	0.895172885	0.047417494	0.008021847	0.048106828	0.389902098	0.047417494
184	185	YBR016W	chrII	+	TATA-containing	TAF1-enriched	55499	270232	270231	-1	YBR016W	1484.4	NULL	0.006842389	0.041828847	0.039979603	0.193930852	0.005950856	0.193930852	0.065817128	0.039979603
185	186	YBR017C	chrII	-	TATA-less	TAF1-enriched	1279	273701	273755	-54	YBR017C	1255.5	NULL	0.796810213	0.032207629	0.046044853	0.503357576	0.030987496	0.14472819	0.438217981	0.208468351
186	187	ST0112	chrII	+	TATA-less	TAF1-enriched	89	276986	276820	-166	ST0112	193.1	NULL	0.140232086	0.193119366	0.342584628	0.67502412	0.790882323	1	0.257624077	0.301326595
187	188	CUT445	chrII	-	TATA-less	TAF1-enriched	9	NA	280863	NA	CUT445	10.2	NULL	0.932206034	0.550817954	1	0.59928633	0.864665265	0.694417686	0.670582894	0.895810367
188	189	YBR021W	chrII	+	TATA-less	TAF1-enriched	571	281503	281353	-150	YBR021W	70.9	NULL	0.071491579	0.01625572	0.348808623	0.232774339	0.659135465	0.348808623	0.795737098	1
189	190	YBR022W	chrII	+	TATA-less	TAF1-depleted	123	283853	283724	-129	YBR022W	101.5	NULL	0.345986525	0.345126713	0.14472819	0.279641534	0.492330692	0.279641534	0.603331772	0.786943898
190	191	YBR023C	chrII	-	TATA-less	TAF1-enriched	232	288035	288069	-34	YBR023C	1229.2	NULL	1	0.443898466	0.044444444	0.049491231	0.862737091	0.044444444	0.201939802	1
191	192	orphan	chrII	-	TATA-containing	TAF1-enriched	4	288300	288311	-11	orphan	2	NULL	0.819476977	0.331424719	0.339727776	0.6084078	0.6084078	0.6084078	0.449999876	1
192	193	YBR024W	chrII	+	TATA-less	TAF1-enriched	1626	289381	289332	-49	YBR024W	286.3	NULL	0.443097314	0.442292754	0.049491231	0.895810367	0.931847255	0.1484791	0.346843113	0.1484791
193	194	orphan	chrII	-	TATA-less	TAF1-enriched	56	290205	290530	-325	orphan	124.5	NULL	0.307332348	0.608498302	0.432023291	1	0.214141414	0.06674615	0.394938074	0.888888889
194	195	YBR025C	chrII	-	TATA-less	TAF1-enriched	3027	291754	291898	-144	YBR025C	8266.1	NULL	0.007154342	0.007154342	0.344156576	1	0.66269405	0.344156576	0.64707823	0.344156576
195	196	orphan	chrII	+	TATA-less	TAF1-enriched	48	NA	292331	NA	orphan	36.8	NULL	0.394107149	0.145986278	1	0.14972246	0.864665265	0.238557044	0.303914253	0.894849724
196	197	YBR026C	chrII	-	TATA-less	TAF1-depleted	2260	293948	294052	-104	YBR026C	244	NULL	0.670037641	0.201939802	1	0.694417686	0.148125677	0.508708087	0.733196121	0.114961001
197	198	YBR028C	chrII	-	TATA-less	TAF1-enriched	156	296023	296083	-60	YBR028C	508.1	NULL	0.426325543	0.005950856	0.06635304	1	0.011962583	0.67502412	0.72367361	0.06635304
198	199	YBR029C	chrII	-	TATA-less	TAF1-enriched	8765	297772	297822	-50	YBR029C	935.8	NULL	0.007800146	0.608498302	1	1	1	0.048798093	0.930608862	0.693529129
199	200	orphan	chrII	+	TATA-less	TAF1-enriched	7	298060	298021	-39	orphan	33.9	NULL	0.08830911	0.104184357	1	0.895810367	0.049587742	0.14972246	0.733196121	1
200	201	YBR030W	chrII	+	TATA-less	TAF1-enriched	15	298274	298203	-71	YBR030W	312.3	NULL	0.864900617	0.004040404	0.533333333	0.600401848	0.864900617	0.711111111	0.864900617	0.06674615
201	202	CUT446	chrII	-	TATA-less	TAF1-enriched	2	299867	299891	-24	CUT446	36.2	NULL	0.931726391	0.050394337	0.512610438	0.895810367	1	0.238557044	0.551517708	0.694417686
202	203	YBR031W	chrII	+	TATA-containing	TAF1-depleted	725309	300178	300150	-28	YBR031W	53023.9	NULL	0.00576184	0.00503917	0.033499083	0.083264517	0.00503917	0.033499083	0.005576156	0.033499083
203	204	YBR034C	chrII	-	TATA-containing	TAF1-depleted	1578	305977	306005	-28	YBR034C	1252.1	NULL	0.017219911	0.185728553	0.125525756	0.036701192	0.045689646	0.036701192	0.761209673	0.125525756
204	205	CUT011	chrII	+	TATA-containing	TAF1-enriched	436	306313	306279	-34	CUT011	222.8	NULL	0.049587742	0.193119366	1	0.357835467	0.049185351	0.357835467	0.345986525	0.895493084
205	206	YBR035C	chrII	-	TATA-less	TAF1-enriched	47636	306956	306982	-26	YBR035C	7143.1	NULL	0.004866885	0.004133256	0.027362545	0.02677094	0.004133256	0.421881247	0.91124672	0.148263844
206	207	orphan	chrII	-	TATA-containing	TAF1-depleted	15682	307284	307344	-60	orphan	57461.8	NULL	0.006740038	0.045197383	0.273321678	1	0.006945558	1	0.190673275	0.577468662
207	208	orphan	chrII	+	TATA-less	TAF1-enriched	1678	307608	307579	-29	orphan	7217.7	NULL	0.130734222	0.006842389	0.039979603	0.780595556	0.005950856	0.193930852	0.138830756	0.776814004
208	209	YBR036C	chrII	-	TATA-less	TAF1-enriched	1950	310332	310361	-29	YBR036C	5034.9	NULL	0.007366379	0.006338844	0.042651237	0.303193256	0.007366379	0.042651237	0.722155497	0.04332537
209	210	YBR037C	chrII	-	TATA-less	TAF1-enriched	89	311440	311468	-28	YBR037C	624.4	NULL	0.008129522	0.006240605	0.872382973	0.203693596	0.476985711	0.377494259	0.409891343	0.872382973
210	211	YBR038W	chrII	+	TATA-less	TAF1-enriched	1842	311993	311843	-150	YBR038W	283.5	NULL	0.267082584	0.732743159	1	1	0.200353348	0.895493084	0.66269405	0.792147392
211	212	YBR039W	chrII	+	TATA-less	TAF1-enriched	2425	315566	315496	-70	YBR039W	4621.7	NULL	0.006945558	0.41827846	0.040643643	0.040643643	0.006945558	0.039979603	0.286844064	0.076031041
212	213	YBR042C	chrII	-	TATA-less	TAF1-enriched	149	321611	321636	-25	YBR042C	193.7	NULL	0.548699	0.731370313	0.081865671	0.892152103	0.020713285	0.888854163	1	0.28274546
213	214	YBR043C	chrII	-	TATA-less	TAF1-enriched	59	324014	324023	-9	YBR043C	424.2	NULL	0.798561763	0.377660987	0.049491231	0.049491231	0.346843113	0.184897599	0.54363657	1
214	215	ANT014	chrII	+	TATA-less	TAF1-enriched	112	324489	324413	-76	ANT014	46.5	NULL	0.56969697	0.004040404	0.294801992	0.432023291	0.004040404	0.044444444	0.041184163	0.533333333
215	216	tV(UAC)B	chrII	+	TATA-less	-	0	NA	326878	NA	tV(UAC)B	1.7	NULL	0.065992055	0.053217721	0.349574806	1	0.280087211	0.382733089	0.662520584	0.772829993
216	217	orphan	chrII	+	TATA-less	TAF1-enriched	28	NA	327303	NA	orphan	1.6	NULL	0.266236376	0.017942811	0.213373707	0.546590042	1	0.070508016	0.541192899	1
217	218	YBR046C	chrII	-	TATA-less	TAF1-enriched	237	331527	331542	-15	YBR046C	499.8	NULL	0.606584521	0.007800146	0.894849724	0.418961725	0.666143638	0.210044337	0.438217981	0.690816272
218	219	YBR048W	chrII	+	TATA-less	TAF1-enriched	18374	332851	332811	-40	YBR048W	22768.9	NULL	0.004532406	0.004055953	0.026183688	0.573775404	0.007921805	0.026183688	0.358771893	0.573775404
219	220	YBR049C	chrII	-	TATA-less	TAF1-enriched	464	336836	336957	-121	YBR049C	645	NULL	0.439858381	0.104798141	0.065086726	0.894523556	0.039064406	0.113846298	0.020939966	0.048106828
220	221	orphan	chrII	+	TATA-less	TAF1-enriched	35	337258	337210	-48	orphan	152.9	NULL	0.19875925	0.66557604	0.692632784	0.506054349	0.199557256	0.684195574	0.729506525	0.048106828
221	222	orphan	chrII	-	TATA-less	TAF1-enriched	45	338565	338796	-231	orphan	38.2	NULL	0.268767553	0.153535354	0.711111111	0.4	0.864900617	0.4	0.214141414	0.266666667
222	223	YBR052C	chrII	-	TATA-less	TAF1-depleted	9302	339378	339413	-35	YBR052C	1290.9	NULL	0.312272539	0.011821138	0.136037128	0.033368235	0.015051346	0.033368235	0.048924852	0.136037128
223	224	YBR053C	chrII	-	TATA-less	TAF1-enriched	235	340746	340763	-17	YBR053C	1002.8	NULL	0.664432119	0.247831149	0.203693596	0.1014806	0.069511238	0.044680647	0.652946182	0.203693596
224	226	orphan	chrII	-	TATA-less	TAF1-enriched	21	341347	341378	-31	orphan	81.6	NULL	0.682828283	0.551517708	0.711111111	0.190345809	0.013624302	0.888888889	1	0.044444444
225	227	orphan	chrII	+	TATA-less	TAF1-enriched	48	NA	341631	NA	orphan	11.5	NULL	0.460606061	0.041184163	0.711111111	0.793389781	0.367676768	0.888888889	0.864900617	0.533333333
226	228	orphan	chrII	+	TATA-less	TAF1-enriched	20	342061	342001	-60	orphan	43.9	NULL	0.495394415	0.021625614	0.14972246	1	0.551517708	0.790882323	0.390749904	0.792771379
227	229	orphan	chrII	+	TATA-less	TAF1-enriched	5	342261	342193	-68	orphan	42.8	NULL	0.670582894	0.201147528	0.4	0.432023291	0.074024444	1	0.733646789	0.533333333
228	230	YBR054W	chrII	+	TATA-containing	TAF1-depleted	5754	343197	342787	-410	YBR054W	3795.7	NULL	0.007259955	0.007154342	0.041979528	1	0.006842389	1	0.790882323	0.175157922
229	231	orphan	chrII	-	TATA-less	TAF1-enriched	12	344101	344161	-60	orphan	2.6	NULL	0.007366379	0.018716589	0.079919784	0.138408493	0.2523249	0.345717816	0.525729278	0.079919784
230	232	YBR055C	chrII	-	TATA-containing	TAF1-enriched	410	347266	347318	-52	YBR055C	390.9	NULL	0.495394415	0.495394415	0.14972246	0.238557044	0.549408625	0.088675943	0.797866593	0.238557044
231	233	YBR056W	chrII	+	TATA-less	TAF1-enriched	3395	348020	347867	-153	YBR056W	1556.7	NULL	0.019609939	0.738078947	0.124220661	0.239316541	0.006240605	0.460343996	0.761209673	0.124220661
232	234	tQ(UUG)B	chrII	+	TATA-less	-	59	350834	350819	-15	tQ(UUG)B	16.1	NULL	0.608498302	0.342527737	1	0.424874689	0.301319497	0.424874689	0.119703534	0.894194334
233	235	YBR056W-A	chrII	+	TATA-less	TAF1-enriched	141	351285	351157	-128	YBR056W-A	896.3	NULL	0.158084651	0.006240605	0.036701192	1	0.005393812	0.67502412	0.529799874	0.036701192
234	236	YBR057C	chrII	-	TATA-less	TAF1-enriched	298	353359	353381	-22	YBR057C	917.7	NULL	0.011408183	1	0.041979528	0.133293185	0.017010283	0.042651237	0.006842389	0.041979528
235	237	YBR058C-A	chrII	-	TATA-less	TAF1-enriched	1922	356567	356612	-45	YBR058C-A	8378.5	NULL	0.099260737	1	0.418961725	0.047417494	0.048783581	0.047417494	0.010030543	0.046730149
236	238	YBR059C	chrII	-	TATA-less	TAF1-enriched	6858	360280	360307	-27	YBR059C	249.4	NULL	0.165086234	0.007473611	0.351857931	0.893526535	0.796810213	1	0.020487551	0.208468351
237	239	CUT018	chrII	+	TATA-less	TAF1-enriched	4	360668	360615	-53	CUT018	8.6	NULL	0.061271395	0.173477636	0.266666667	0.266666667	0.460606061	0.190345809	0.010707918	0.266666667
238	240	YBR060C	chrII	-	TATA-less	TAF1-depleted	75	362567	362568	-1	YBR060C	636.2	NULL	0.007154342	0.728082961	0.042651237	0.888854163	0.011867751	0.125525756	0.042448854	0.041979528
239	241	ST0138	chrII	+	TATA-less	TAF1-enriched	58	362900	362886	-14	ST0138	365.5	NULL	0.008360374	0.008360374	0.533333333	0.693529129	0.199557256	0.793389781	0.267926383	0.116073943
240	242	YBR061C	chrII	-	TATA-less	TAF1-enriched	143	365694	365743	-49	YBR061C	516.5	NULL	0.120315543	0.120315543	1	0.576150122	0.245278117	0.746885633	0.609834044	0.148263844
241	243	YBR062C	chrII	-	TATA-less	TAF1-enriched	354	NA	366622	NA	YBR062C	157.1	NULL	0.007910597	0.012972764	0.046730149	1	0.007800146	1	0.438217981	0.046730149
242	244	YBR065C	chrII	-	TATA-less	TAF1-enriched	145	369688	369720	-32	YBR065C	509.5	NULL	0.006740038	0.007366379	1	0.206884586	0.605293017	1	0.425447522	0.68122512
243	245	CUT020	chrII	+	TATA-less	TAF1-enriched	197	370029	369956	-73	CUT020	6.4	NULL	0.268767553	0.549408625	0.354866599	0.173441705	0.39159429	0.895810367	1	0.895810367
244	246	YBR066C	chrII	-	TATA-containing	TAF1-enriched	2448	370731	370737	-6	YBR066C	336.8	NULL	0.439858381	0.008246738	0.232774339	0.511319908	0.796810213	0.895493084	0.073517488	0.232774339
245	247	orphan	chrII	-	TATA-less	TAF1-enriched	722	370932	370974	-42	orphan	126.2	NULL	0.795012172	0.606584521	0.787615767	1	0.427199637	0.145981945	0.729506525	0.2811981
246	248	ST0142	chrII	+	TATA-less	TAF1-enriched	27	371525	371436	-89	ST0142	47.1	NULL	0.808080808	0.933333333	0.888888889	0.177777778	0.808080808	0.177777778	0.460606061	0.432023291
247	249	YBR067C	chrII	-	TATA-containing	TAF1-depleted	62945	372699	372786	-87	YBR067C	3406.7	NULL	0.008246738	0.798215076	0.049491231	0.895810367	0.008246738	1	0.550114935	0.049491231
248	250	orphan	chrII	+	TATA-less	TAF1-depleted	43	373492	373486	-6	orphan	26.2	NULL	0.56969697	0.682828283	0.711111111	0.533333333	0.268767553	0.793389781	0.808080808	0.1484791
249	251	orphan	chrII	-	TATA-less	TAF1-enriched	63	374724	374789	-65	orphan	46.7	NULL	1	0.56969697	0.044444444	1	1	0.266666667	1	0.694417686
250	252	YBR068C	chrII	-	TATA-containing	TAF1-depleted	198	375627	375729	-102	YBR068C	3348.3	NULL	0.003261123	1	0.015494295	0.136037128	0.003061939	0.015975041	0.595883091	0.015494295
251	253	CUT021	chrII	+	TATA-less	TAF1-enriched	62	376588	376504	-84	CUT021	75.1	NULL	0.303914253	0.145270893	0.184897599	0.354866599	0.143118038	0.063431425	0.06443412	0.143471009
252	254	YBR069C	chrII	-	TATA-containing	TAF1-depleted	1714	378536	378538	-2	YBR069C	3388	NULL	0.004532406	0.004532406	0.146399099	0.026183688	0.004055953	0.026183688	0.004782003	0.146399099
253	255	CUT022	chrII	+	TATA-less	TAF1-depleted	30	379293	379263	-30	CUT022	13.3	NULL	0.932206034	0.074024444	1	0.694417686	0.443898466	0.14972246	0.670582894	0.238557044
254	256	YBR070C	chrII	-	TATA-less	TAF1-enriched	324	379956	379964	-8	YBR070C	803.5	NULL	0.341654836	0.101109741	0.68989587	0.35033841	0.796096689	0.784191229	0.652946182	1
255	257	YBR071W	chrII	+	TATA-less	TAF1-depleted	2455	380438	380435	-3	YBR071W	3505.5	NULL	0.797164177	0.008246738	1	0.048798093	0.267926383	0.792147392	0.267926383	0.087703529
256	258	orphan	chrII	-	TATA-less	TAF1-enriched	143	380948	380955	-7	orphan	133.8	NULL	0.072727273	0.798561763	0.888888889	0.06674615	0.201939802	0.044444444	0.932087071	0.266666667
257	259	CUT023	chrII	+	TATA-less	TAF1-enriched	7	381489	381213	-276	CUT023	46.6	NULL	0.733646789	0.048484848	0.711111111	0.044444444	1	0.888888889	0.609758799	0.600401848
258	260	YBR073W	chrII	+	TATA-containing	TAF1-enriched	1185	383177	383137	-40	YBR073W	546.3	NULL	0.027980503	0.005855932	0.767755389	0.124220661	0.737315677	0.871798602	0.029264263	0.767755389
259	261	YBR074W	chrII	+	TATA-less	TAF1-enriched	430	NA	386281	NA	YBR074W	1610.9	NULL	0.007800146	0.047981942	0.046730149	0.484695003	0.006842389	0.786943898	0.297817462	0.046044853
260	262	YBR076C-A	chrII	-	TATA-containing	TAF1-enriched	1216	391635	391670	-35	YBR076C-A	147.3	NULL	0.016161616	0.008080808	0.177777778	0.711111111	0.048484848	0.533333333	0.733196121	0.4
261	263	orphan	chrII	-	TATA-less	TAF1-enriched	24	391881	392003	-122	orphan	93.2	NULL	0.173477636	0.864900617	0.888888889	0.088888889	0.460606061	0.4	0.808080808	0.4
262	264	YBR077C	chrII	-	TATA-less	TAF1-depleted	23	392279	392337	-58	YBR077C	202.5	NULL	0.231192354	0.193930852	0.894523556	0.1484791	0.668385514	0.692632784	0.440673311	1
263	265	YBR078W	chrII	+	TATA-less	TAF1-depleted	4352	NA	392947	NA	YBR078W	5145.8	NULL	0.001733589	0.001313653	0.004915802	0.080118314	0.001556573	NaN	0.215924939	0.005188608
264	266	orphan	chrII	-	TATA-less	TAF1-enriched	2	393180	393296	-116	orphan	3.5	NULL	1	0.496151813	0.693529129	0.4	0.193939394	0.4	0.550817954	0.088888889
265	267	orphan	chrII	+	TATA-less	TAF1-enriched	336	393633	393552	-81	orphan	152.3	NULL	0.268767553	0.041184163	0.190345809	0.088888889	0.367676768	0.4	1	0.711111111
266	268	YBR079C	chrII	-	TATA-less	TAF1-enriched	58032	398256	398302	-46	YBR079C	959.2	NULL	0.123712341	0.070985635	0.692632784	0.290346834	0.547269697	0.143471009	0.194740405	0.691728538
267	269	YBR080C	chrII	-	TATA-less	TAF1-enriched	4226	400870	400916	-46	YBR080C	385.2	NULL	0.003261123	0.003261123	1	0.015975041	1	0.136037128	0.191694602	0.023868442
268	270	YBR081C	chrII	-	TATA-less	TAF1-enriched	14	405344	405397	-53	YBR081C	91.7	NULL	0.008246738	0.020713285	0.048798093	0.048798093	0.347696494	0.048798093	0.087748841	0.598161453
269	271	YBR082C	chrII	-	TATA-less	TAF1-enriched	28186	407136	407246	-110	YBR082C	5697.4	NULL	0.225345694	0.007154342	0.04332537	0.04332537	0.00924624	0.135857322	0.657313488	0.125525756
270	272	orphan	chrII	+	TATA-less	TAF1-enriched	10	NA	407639	NA	orphan	81.3	NULL	0.049990741	0.020713285	0.693529129	0.237122014	1	0.4291953	1	0.690816272
271	273	orphan	chrII	+	TATA-less	TAF1-depleted	7	408312	408152	-160	orphan	22.4	NULL	0.214141414	0.933333333	0.533333333	0.888888889	0.609758799	1	0.173477636	0.432023291
272	274	CUT453	chrII	-	TATA-less	TAF1-enriched	104	408312	408393	-81	CUT453	28.4	NULL	0.460606061	0.153535354	0.888888889	0.044444444	0.028282828	0.044444444	0.233663465	0.049491231
273	275	YBR083W	chrII	+	TATA-containing	TAF1-depleted	284	409137	408940	-197	YBR083W	46.9	NULL	0.08830911	0.172722365	0.894849724	1	0.668938973	0.359305232	0.106024499	0.14972246
274	276	YBR084W	chrII	+	TATA-less	TAF1-enriched	1028	411066	411016	-50	YBR084W	988	NULL	0.703616634	0.099877403	0.301326595	0.67502412	0.128645924	0.301326595	0.045593068	0.124220661
275	277	YBR084C-A	chrII	-	TATA-less	TAF1-enriched	1960	415212	415311	-99	YBR084C-A	5325	NULL	0.044408231	0.007690497	0.046044853	0.079919784	0.007690497	0.045361665	0.054503134	0.046044853
276	278	YBR085W	chrII	+	TATA-less	TAF1-depleted	93	415919	415908	-11	YBR085W	246.8	NULL	0.347696494	0.426325543	0.692632784	0.684195574	0.797516299	0.893187858	0.607863471	0.791517735
277	279	YBR085C-A	chrII	-	TATA-containing	TAF1-enriched	8770	419058	419193	-135	YBR085C-A	1916.1	NULL	0.008021847	0.048783581	0.354866599	1	0.007581651	0.894849724	0.441484761	0.046730149
278	280	orphan	chrII	+	TATA-less	TAF1-enriched	201	419491	419476	-15	orphan	75.7	NULL	0.106024499	0.008360374	0.895810367	0.694417686	0.932206034	0.694417686	0.394107149	0.238557044
279	281	YBR086C	chrII	-	TATA-less	TAF1-depleted	889	423106	423269	-163	YBR086C	4315	NULL	0.003329187	0.003061939	0.015975041	0.015494295	0.003261123	0.015494295	0.003261123	0.015975041
280	282	CUT024	chrII	+	TATA-less	TAF1-enriched	16	423600	423586	-14	CUT024	186.9	NULL	0.017219911	0.668385514	0.426325543	0.595883091	0.603331772	0.59928633	0.605940351	0.065915952
281	283	YBR087W	chrII	+	TATA-less	TAF1-enriched	351	423805	423754	-51	YBR087W	1002.2	NULL	0.130734222	0.427199637	0.035410671	0.478520977	0.422789605	0.887685742	0.341549865	0.035410671
282	284	YBR088C	chrII	-	TATA-containing	TAF1-depleted	2133	425824	425812	12	YBR088C	593.3	NULL	0.011408183	0.323472702	0.685167447	0.657788651	1	0.657788651	0.122563702	0.342584628
283	285	orphan	chrII	+	TATA-containing	TAF1-enriched	1	NA	426122	NA	orphan	11	NULL	0.56969697	0.670582894	0.711111111	0.4	0.56969697	0.711111111	0.109090909	0.888888889
284	286	orphan	chrII	+	TATA-less	TAF1-enriched	152	426829	426690	-139	orphan	1	NULL	1	0.112230925	0.751829634	NA	0.866815285	0.16585666	0.69627034	1
285	287	YBR090C	chrII	-	TATA-less	TAF1-enriched	689	426829	426912	-83	YBR090C	1043.5	NULL	0.046742883	0.004133256	0.518605016	0.576150122	0.685337702	0.518605016	0.360765351	0.576150122
286	288	orphan	chrII	+	TATA-containing	TAF1-enriched	186	427187	427132	-55	orphan	18.7	NULL	0.307332348	0.43573066	0.088888889	0.533333333	0.682828283	0.533333333	0.798215076	0.711111111
287	289	YBR091C	chrII	-	TATA-less	TAF1-enriched	185	427758	427773	-15	YBR091C	40.6	NULL	0.808080808	0.551517708	0.177777778	0.888888889	0.56969697	1	0.609758799	0.4
288	290	YBR092C	chrII	-	TATA-containing	TAF1-depleted	5564	428988	429115	-127	YBR092C	2034.6	NULL	0.003261123	0.057346852	0.45605654	0.802587349	0.003329187	0.348501424	0.694095468	0.802587349
289	291	CUT025	chrII	+	TATA-less	TAF1-enriched	54	429611	429582	-29	CUT025	74.4	NULL	0.443097314	0.331829403	0.14972246	0.293325574	0.049587742	0.894849724	0.729976105	0.512610438
290	292	YBR093C	chrII	-	TATA-containing	TAF1-depleted	1264	430895	430986	-91	YBR093C	4984.7	NULL	0.107433383	0.003329187	0.802587349	0.015494295	0.694095468	0.015975041	0.003193895	0.802587349
291	293	orphan	chrII	+	TATA-less	TAF1-enriched	52	431656	431498	-158	orphan	46.7	NULL	0.808080808	0.109090909	0.294801992	0.711111111	0.609758799	0.432023291	0.550817954	0.600401848
292	294	YBR095C	chrII	-	TATA-less	TAF1-enriched	260	435699	435727	-28	YBR095C	804.4	NULL	0.019609939	0.016594238	0.889235607	0.050399283	0.042059394	0.050399283	0.418876446	0.06635304
293	295	YBR096W	chrII	+	TATA-less	TAF1-enriched	168	435992	435939	-53	YBR096W	490.1	NULL	0.008371401	0.006537796	0.040643643	0.040643643	0.005950856	0.039979603	0.169604801	0.039979603
294	296	YBR097W	chrII	+	TATA-less	TAF1-enriched	189	436952	436920	-32	YBR097W	299.1	NULL	0.006537796	0.015775183	0.120288243	0.193930852	0.006842389	0.193930852	0.233910901	0.780595556
295	297	YBR101C	chrII	-	TATA-less	TAF1-enriched	792	444698	444755	-57	YBR101C	3526.5	NULL	0.16585666	0.007154342	0.676082741	0.04332537	0.165086234	0.042651237	1	0.303193256
296	298	orphan	chrII	+	TATA-less	TAF1-depleted	15	445185	445030	-155	orphan	201.1	NULL	0.145270893	0.088869286	0.088888889	0.266666667	0.394938074	0.085758003	0.282828283	0.4
297	299	YBR102C	chrII	-	TATA-less	TAF1-depleted	223	447336	447401	-65	YBR102C	407.8	NULL	0.005855932	0.00576184	0.413176151	0.413176151	1	0.87832485	0.75585112	0.177015983
298	300	YBR103W	chrII	+	TATA-less	TAF1-enriched	203	447597	447549	-48	YBR103W	376.7	NULL	0.140955219	0.024084965	0.104870291	0.576150122	0.04128299	0.076031041	0.297569609	0.685167447
299	301	orphan	chrII	-	TATA-less	TAF1-enriched	30	449266	449306	-40	orphan	8.1	NULL	0.050394337	0.050394337	0.694417686	1	0.551517708	0.694417686	0.798561763	1
300	302	YBR104W	chrII	+	TATA-less	TAF1-depleted	199	NA	449576	NA	YBR104W	823.6	NULL	0.060362915	0.193119366	1	0.894523556	1	0.291840545	0.224501127	0.18763233
301	303	YBR105C	chrII	-	TATA-containing	TAF1-depleted	4665	451889	451998	-109	YBR105C	4488.2	NULL	0.339899051	0.036700635	0.786265613	0.041979528	0.216793336	0.301326595	1	0.49356279
302	304	YBR106W	chrII	+	TATA-less	TAF1-enriched	85013	452665	452619	-46	YBR106W	12657.8	NULL	0.197959327	0.389902098	0.68989587	0.893526535	0.727603425	0.790241066	0.604642493	0.046730149
303	305	YBR107C	chrII	-	TATA-less	TAF1-enriched	108	454539	454573	-34	YBR107C	216.9	NULL	0.19875925	0.864665265	1	0.508708087	0.060816949	0.694417686	0.733196121	0.14972246
304	306	YBR108W	chrII	+	TATA-less	TAF1-enriched	135	454828	454776	-52	YBR108W	782.9	NULL	0.001556573	1	0.004915802	0.004915802	0.001643552	0.005188608	0.215924939	0.004915802
305	307	YBR109C	chrII	-	TATA-less	TAF1-enriched	1280	458381	458409	-28	YBR109C	2312.7	NULL	0.007910597	0.047182916	0.046044853	0.06260547	0.012812142	1	0.491556101	0.222376248
306	308	YBR110W	chrII	+	TATA-less	TAF1-enriched	138	458852	458718	-134	YBR110W	327	NULL	0.038364038	0.383869819	0.788281321	0.784889385	0.0815826	0.784889385	0.200787142	0.585130627
307	309	YBR111C	chrII	-	TATA-containing	TAF1-depleted	2304	461707	461865	-158	YBR111C	5565.7	NULL	0.857531313	0.011796661	0.034132951	0.413176151	0.005855932	0.413176151	0.214542019	0.033499083
308	310	YBR111W-A	chrII	+	TATA-less	TAF1-enriched	768	462139	462120	-19	YBR111W-A	1682.3	NULL	1	0.011408183	0.055234254	0.256839258	0.010957184	0.193930852	0.636601633	0.072149939
309	311	YBR112C	chrII	-	TATA-less	TAF1-enriched	5587	465906	465945	-39	YBR112C	4334.1	NULL	0.045197383	0.660928738	0.120288243	0.484695003	0.044802434	0.193930852	0.928755908	0.784191229
310	312	YBR114W	chrII	+	TATA-containing	TAF1-enriched	1310	467222	467160	-62	YBR114W	600.8	NULL	0.007800146	0.007366379	0.103741678	0.590013887	0.007800146	0.045361665	0.061930587	0.045361665
311	313	YBR115C	chrII	-	TATA-containing	TAF1-depleted	24559	473844	473973	-129	YBR115C	5821.4	NULL	0.035938931	0.006240605	0.042651237	0.042651237	0.006240605	0.042651237	0.017430599	0.042651237
312	314	ST0169	chrII	+	TATA-containing	TAF1-enriched	231	474364	474344	-20	ST0169	99.4	NULL	0.932206034	0.025649925	1	0.359305232	0.349393711	1	0.603331772	1
313	315	orphan	chrII	+	TATA-less	TAF1-enriched	9	477203	477193	-10	orphan	0.7	NULL	0.248213079	0.118670346	NaN	NaN	NA	NaN	NaN	NA
314	316	YBR118W	chrII	+	TATA-containing	TAF1-depleted	15587	477692	477649	-43	YBR118W	361033	NULL	0.006945558	0.006945558	0.047417494	0.499229169	0.007910597	0.499229169	0.790104282	0.047417494
315	317	YBR119W	chrII	+	TATA-less	TAF1-enriched	913	479334	479298	-36	YBR119W	420.7	NULL	0.013624302	0.008360374	0.691728538	0.694417686	0.106024499	0.049491231	0.60913007	0.14972246
316	318	YBR120C	chrII	-	TATA-less	TAF1-enriched	314	480946	480993	-47	YBR120C	70.5	NULL	0.682828283	0.394938074	0.694417686	0.4	0.933333333	0.533333333	1	0.711111111
317	319	YBR121C	chrII	-	TATA-less	TAF1-enriched	2120	483297	483434	-137	YBR121C	7702.7	NULL	0.006240605	0.2523249	0.03605437	0.036701192	0.005950856	0.036701192	0.394066029	0.03605437
318	320	YBR122C	chrII	-	TATA-less	TAF1-enriched	282	484499	484536	-37	YBR122C	557.3	NULL	0.049990741	0.268767553	0.14972246	0.266666667	0.282828283	1	0.733646789	1
319	321	YBR123C	chrII	-	TATA-less	TAF1-enriched	788	486696	486728	-32	YBR123C	183.1	NULL	0.04838244	0.019816095	0.279641534	0.046730149	0.044802434	0.046730149	0.019816095	0.353367292
320	322	YBR125C	chrII	-	TATA-containing	TAF1-depleted	381	488948	488958	-10	YBR125C	106.6	NULL	0.268767553	1	0.694417686	0.512610438	1	0.354866599	0.199557256	0.238557044
321	323	YBR126C	chrII	-	TATA-containing	TAF1-depleted	2955	490316	490463	-147	YBR126C	5934.2	NULL	0.007366379	0.007366379	0.044001861	0.203693596	0.53915997	0.203693596	0.069511238	0.503357576
322	324	YBR126W-A	chrII	+	TATA-less	TAF1-enriched	18563	490845	490827	-18	YBR126W-A	6583.7	NULL	1	0.488422317	0.046730149	0.046730149	1	0.084784996	0.791268113	0.353367292
323	325	YBR127C	chrII	-	TATA-less	TAF1-enriched	4233	492820	492880	-60	YBR127C	28451.9	NULL	0.005393812	0.005393812	0.03605437	0.421881247	0.005393812	0.421881247	0.220150713	0.036701192
324	326	CUT027	chrII	+	TATA-less	TAF1-enriched	233	493283	493130	-153	CUT027	85.2	NULL	0.016161616	0.125706788	0.711111111	0.711111111	0.153535354	0.4	0.798215076	0.177777778
325	327	YBR131W	chrII	+	TATA-less	TAF1-enriched	136	497169	497148	-21	YBR131W	153.3	NULL	0.545826818	0.491556101	1	0.504711414	0.104184357	0.504711414	0.86123563	0.231310785
326	328	YBR132C	chrII	-	TATA-containing	TAF1-depleted	10754	501601	501594	7	YBR132C	382.3	NULL	0.535327847	0.046265852	0.484695003	1	0.536101864	0.480085003	0.218758005	0.67502412
327	329	YBR133C	chrII	-	TATA-containing	TAF1-enriched	514	504396	504416	-20	YBR133C	392.1	NULL	0.548699	0.300448558	0.046044853	0.232774339	0.007800146	0.080892654	0.265387054	0.046044853
328	330	YBR135W	chrII	+	TATA-containing	TAF1-enriched	535	504800	504760	-40	YBR135W	1258	NULL	0.007366379	0.030081867	0.784889385	0.1014806	0.337240128	0.1014806	0.026258184	0.203693596
329	331	YBR136W	chrII	+	TATA-less	TAF1-enriched	506	505690	505650	-40	YBR136W	468.6	NULL	0.004055953	0.358771893	0.88123519	0.573775404	0.004532406	0.573775404	0.358771893	0.623433341
330	332	YBR137W	chrII	+	TATA-less	TAF1-depleted	154	513115	512982	-133	YBR137W	228.6	NULL	0.266236144	0.086628059	1	0.691728538	0.025914063	0.894849724	0.548699	0.047417494
331	333	YBR138C	chrII	-	TATA-less	TAF1-enriched	90	515358	515405	-47	YBR138C	352.6	NULL	0.493101793	0.345986525	0.430614455	0.088675943	0.070479927	0.049491231	0.394107149	0.595883091
332	334	YBR139W	chrII	+	TATA-containing	TAF1-depleted	4465	515681	515650	-31	YBR139W	1040.9	NULL	0.328151669	0.541414544	1	0.784889385	0.861489297	0.104870291	1	0.893187858
333	335	YBR141W-A	chrII	+	TATA-less	TAF1-enriched	0	527056	526947	-109	YBR141W-A	0.6	NULL	NaN	0.46815991	1	NaN	NaN	1	1	1
334	336	YBR142W	chrII	+	TATA-less	TAF1-enriched	490	528296	528242	-54	YBR142W	1043.8	NULL	1	0.144554389	0.235679913	0.59928633	0.331829403	0.59928633	0.550114935	0.065915952
335	337	YBR143C	chrII	-	TATA-less	TAF1-enriched	929	NA	532218	NA	YBR143C	990.4	NULL	0.007154342	0.007259955	0.076031041	0.042651237	0.138056172	0.223883771	0.476985711	0.135857322
336	338	ST0182	chrII	+	TATA-less	TAF1-enriched	35	532516	532507	-9	ST0182	68	NULL	0.045989475	0.069469265	0.132006336	0.046044853	0.01849969	0.501992689	0.432363287	0.132006336
337	339	orphan	chrII	-	TATA-less	TAF1-enriched	340	533196	533274	-78	orphan	117.3	NULL	0.268767553	0.074024444	0.049491231	0.694417686	0.349393711	0.895810367	0.550817954	0.049491231
338	340	YBR145W	chrII	+	TATA-containing	TAF1-depleted	152	533720	533706	-14	YBR145W	688.6	NULL	0.004040404	0.004040404	0.888888889	0.4	0.048484848	0.044444444	0.808080808	0.4
339	341	YBR146W	chrII	+	TATA-less	TAF1-enriched	294	535244	535232	-12	YBR146W	1861.9	NULL	0.003061939	0.015051346	0.015975041	0.136037128	0.003061939	1	0.214542019	0.015494295
340	342	CUT455	chrII	-	TATA-less	TAF1-enriched	157	539685	539706	-21	CUT455	13.2	NULL	0.797516299	0.050394337	0.512610438	0.512610438	0.033441628	0.359305232	0.798561763	0.234230702
341	343	YBR149W	chrII	+	TATA-containing	TAF1-depleted	2304	539961	539922	-39	YBR149W	2328	NULL	0.107433383	0.003261123	0.015494295	0.015975041	0.10666884	0.015975041	0.311071854	0.015975041
342	344	YBR150C	chrII	-	TATA-less	TAF1-enriched	269	544473	544509	-36	YBR150C	120.3	NULL	0.146700539	0.040120865	0.137134544	0.598161453	0.111611768	1	0.862242032	0.28733307
343	345	YBR151W	chrII	+	TATA-less	TAF1-enriched	63	544942	544909	-33	YBR151W	2615.7	NULL	0.190673275	0.006537796	0.120288243	0.055234254	0.006537796	0.039979603	0.600670882	0.671784971
344	346	YBR152W	chrII	+	TATA-less	TAF1-enriched	128	546581	546396	-185	YBR152W	92.8	NULL	0.864665265	0.013624302	0.114961001	0.14972246	0.103570182	0.1484791	0.232018345	0.359305232
345	347	YBR153W	chrII	+	TATA-less	TAF1-enriched	166	547574	547407	-167	YBR153W	114.4	NULL	0.864900617	0.670582894	0.432023291	0.711111111	0.551517708	0.600401848	0.798561763	0.600401848
346	348	YBR154C	chrII	-	TATA-containing	TAF1-depleted	537	549071	549122	-51	YBR154C	19017.2	NULL	0.129595844	0.010355673	0.080118314	NaN	0.001643552	0.004915802	NaN	0.080118314
347	349	CUT456	chrII	-	TATA-less	TAF1-enriched	54	549491	549532	-41	CUT456	57.6	NULL	0.864665265	1	0.06674615	0.177777778	0.808080808	0.044444444	0.028282828	0.533333333
348	350	YBR156C	chrII	-	TATA-less	TAF1-enriched	95	553195	553241	-46	YBR156C	206.5	NULL	0.603988754	0.596577576	0.234230702	0.145981945	0.199557256	0.590013887	0.930987447	0.288844366
349	351	YBR157C	chrII	-	TATA-containing	TAF1-depleted	334	554285	554392	-107	YBR157C	132.6	NULL	0.033131861	0.608498302	0.049491231	0.59928633	0.008246738	0.232774339	1	0.049491231
350	352	orphan	chrII	-	TATA-less	TAF1-enriched	142	554518	554622	-104	orphan	21.4	NULL	1	0.020487551	0.228361945	0.232774339	0.929700693	0.894523556	0.603331772	0.046730149
351	353	orphan	chrII	-	TATA-less	TAF1-enriched	188	555131	555145	-14	orphan	420.3	NULL	0.048783581	0.66557604	0.048798093	0.048798093	0.008246738	0.357835467	0.266236144	0.354866599
352	354	orphan	chrII	+	TATA-less	TAF1-enriched	70	NA	555479	NA	orphan	96.3	NULL	1	1	0.177777778	0.711111111	0.496151813	0.177777778	0.808080808	1
353	355	YBR158W	chrII	+	TATA-containing	TAF1-depleted	618	556603	556286	-317	YBR158W	1271.5	NULL	0.017010283	0.007049543	0.499229169	0.057677444	0.007049543	0.888854163	0.787717012	0.042651237
354	356	YBR159W	chrII	+	TATA-less	TAF1-enriched	400	558696	558644	-52	YBR159W	1145.2	NULL	0.595883091	0.026835268	1	0.882614174	0.013426387	0.421881247	0.61251428	0.06635304
355	357	YBR160W	chrII	+	TATA-less	TAF1-enriched	443	560061	560000	-61	YBR160W	2902.5	NULL	0.007154342	0.007154342	0.67502412	0.041979528	0.09307828	0.041979528	0.596577576	0.301326595
356	358	YBR161W	chrII	+	TATA-less	TAF1-enriched	394	561398	561365	-33	YBR161W	172	NULL	0.551517708	0.004040404	0.044444444	0.359305232	0.214141414	0.266666667	0.147413673	0.888888889
357	359	YBR162C	chrII	-	TATA-less	TAF1-depleted	29955	564669	564802	-133	YBR162C	2877.9	NULL	0.045689646	0.006338844	0.03605437	0.070213707	0.044394399	0.889235607	0.042839137	0.872382973
358	360	YBR162W-A	chrII	+	TATA-less	TAF1-enriched	9195	565246	565178	-68	YBR162W-A	8012.6	NULL	1	0.128645924	1	NaN	0.125786425	0.004915802	0.215924939	0.004915802
359	361	YBR163W	chrII	+	TATA-less	TAF1-enriched	279	565668	565659	-9	YBR163W	464.1	NULL	0.071491579	0.086628059	0.595883091	0.145981945	0.438217981	0.426325543	0.441484761	0.085758003
360	362	YBR164C	chrII	-	TATA-containing	TAF1-depleted	118	568503	568561	-58	YBR164C	805	NULL	0.49463363	0.544370146	0.694417686	0.14972246	0.548699	0.049491231	1	0.693529129
361	363	YBR165W	chrII	+	TATA-less	TAF1-enriched	47	568796	568761	-35	YBR165W	185.9	NULL	0.004866885	0.004614763	0.105671625	0.027362545	0.004614763	0.027362545	0.008437162	0.027362545
362	364	YBR168W	chrII	+	TATA-less	TAF1-enriched	109	NA	572067	NA	YBR168W	109.6	NULL	0.551517708	0.046386593	0.088675943	0.792771379	0.443898466	0.512610438	0.797866593	0.145981945
363	365	CUT029	chrII	+	TATA-less	TAF1-enriched	2738	576569	576368	-201	CUT029	22	NULL	0.072727273	0.733646789	0.177777778	1	0.367676768	0.793389781	1	1
364	366	YBR172C	chrII	-	TATA-less	TAF1-enriched	4637	581443	581483	-40	YBR172C	297.4	NULL	0.43573066	0.011867751	1	0.67502412	0.184897599	0.042651237	0.924391996	0.135857322
365	367	YBR173C	chrII	-	TATA-less	TAF1-enriched	8799	582159	582200	-41	YBR173C	8782.6	NULL	0.046265852	0.013238249	0.035410671	1	0.068723327	0.065390823	0.013238249	0.03605437
366	368	YBR175W	chrII	+	TATA-less	TAF1-enriched	682	582434	582408	-26	YBR175W	691.8	NULL	0.005855932	0.006143194	0.484695003	0.06635304	0.006143194	0.035410671	0.006143194	0.139793337
367	369	YBR176W	chrII	+	TATA-less	TAF1-enriched	2103	583643	583634	-9	YBR176W	132.2	NULL	0.105411524	0.046386593	0.14972246	0.512610438	0.733196121	0.188991722	0.668938973	0.114961001
368	370	YBR179C	chrII	-	TATA-less	TAF1-enriched	1092	589156	589179	-23	YBR179C	1038.4	NULL	0.007581651	0.293333361	0.49356279	0.203693596	0.047582097	0.203693596	0.308863582	0.480085003
369	371	YBR181C	chrII	-	TATA-less	TAF1-enriched	24358	592756	592803	-47	YBR181C	8781.4	NULL	0.521551992	0.005950856	0.295641821	0.208468351	0.125786425	0.039979603	0.014580044	0.295641821
370	372	YBR183W	chrII	+	TATA-less	TAF1-depleted	32	596165	595979	-186	YBR183W	1151.7	NULL	0.100493741	0.012178835	0.786943898	0.892845929	0.173916672	0.138408493	0.186557552	0.04332537
371	373	YBR185C	chrII	-	TATA-less	TAF1-enriched	794	599957	599982	-25	YBR185C	209	NULL	0.193119366	0.548699	0.895172885	0.692632784	0.524071423	0.231310785	0.730907977	0.347268461
372	374	ST3857	chrII	-	TATA-less	TAF1-enriched	28	602217	602309	-92	ST3857	101.8	NULL	0.550114935	0.020939966	0.186267625	0.68989587	0.342527737	0.231310785	0.073010712	0.506054349
373	375	YBR187W	chrII	+	TATA-less	TAF1-depleted	482	602558	602520	-38	YBR187W	1555.7	NULL	0.015775183	0.112289606	0.039979603	0.780595556	0.005950856	0.040643643	0.016594238	0.039979603
374	376	YBR189W	chrII	+	TATA-less	TAF1-enriched	10683	604525	604482	-43	YBR189W	53307	NULL	0.044368049	0.005576156	0.87832485	0.177015983	0.214542019	0.034132951	0.059705884	0.177015983
375	377	YBR191W	chrII	+	TATA-less	TAF1-enriched	11552	606277	606203	-74	YBR191W	19524.8	NULL	0.014577797	0.860206843	0.208468351	0.892152103	0.07136402	0.585130627	0.07136402	0.208468351
376	378	YBR192W	chrII	+	TATA-less	TAF1-enriched	201	607521	607489	-32	YBR192W	239.1	NULL	0.345986525	0.116343478	0.046730149	0.49783023	0.007910597	0.232774339	1	0.046730149
377	379	orphan	chrII	+	TATA-less	TAF1-enriched	18	609566	609421	-145	orphan	9.1	NULL	0.933333333	0.282828283	0.888888889	0.711111111	1	0.888888889	0.609758799	0.711111111
378	380	YBR193C	chrII	-	TATA-less	TAF1-depleted	411	609725	609760	-35	YBR193C	566.5	NULL	0.226187914	0.049185351	0.48620496	0.790882323	0.929832618	0.047417494	0.428069831	0.48620496
379	381	YBR195C	chrII	-	TATA-less	TAF1-enriched	78	611861	611875	-14	YBR195C	761.2	NULL	0.004782003	0.004055953	0.026183688	0.623433341	0.004532406	0.092176992	0.024608672	0.026183688
380	382	YBR196C	chrII	-	TATA-containing	TAF1-depleted	5647	613901	613973	-72	YBR196C	24915.9	NULL	1	1	1	1	1	0.790882323	0.796810213	1
381	383	CUT030	chrII	+	TATA-less	TAF1-enriched	1139	614716	614520	-196	CUT030	231.2	NULL	0.124377909	0.013624302	0.512610438	0.14972246	0.033441628	0.049491231	1	0.692632784
382	384	orphan	chrII	-	TATA-less	TAF1-enriched	45	614716	614937	-221	orphan	90.5	NULL	0.682828283	0.460606061	1	1	0.550817954	0.888888889	0.496151813	1
383	385	ANT027	chrII	+	TATA-less	TAF1-enriched	110	615386	615406	20	ANT027	67.6	NULL	1	0.346843113	1	0.600401848	0.199557256	0.266666667	0.549408625	0.294801992
384	386	YBR197C	chrII	-	TATA-less	TAF1-enriched	196	615823	615867	-44	YBR197C	607.6	NULL	0.006740038	0.190673275	0.045361665	0.583882421	0.045593068	0.501992689	0.41827846	0.347268461
385	387	YBR198C	chrII	-	TATA-less	TAF1-depleted	263	618530	618601	-71	YBR198C	707.7	NULL	0.647744929	0.185728553	0.042651237	0.219338776	0.007154342	0.342584628	0.036325106	0.042651237
386	388	YBR199W	chrII	+	TATA-less	TAF1-enriched	2267	618866	618816	-50	YBR199W	3392.8	NULL	0.032207629	0.007910597	0.085758003	0.353367292	0.007581651	0.14472819	0.122378978	0.046730149
387	389	YBR200W	chrII	+	TATA-less	TAF1-enriched	342	620870	620809	-61	YBR200W	694.9	NULL	0.092458691	0.006143194	0.89108562	0.34100186	0.775389633	0.217808754	0.09307828	0.075059873
388	390	YBR201W	chrII	+	TATA-less	TAF1-enriched	367	623478	623440	-38	YBR201W	1207.3	NULL	0.663276399	0.007154342	0.894194334	0.511319908	0.605940351	0.291840545	0.09307828	0.894194334
389	391	YBR201C-A	chrII	-	TATA-containing	TAF1-enriched	223	624644	624765	-121	YBR201C-A	1024.1	NULL	0.201939802	0.201939802	0.088888889	0.06674615	0.109090909	0.044444444	0.173477636	0.600401848
390	392	orphan	chrII	-	TATA-less	TAF1-enriched	95	624964	625063	-99	orphan	37.6	NULL	0.460606061	0.072727273	0.432023291	0.049491231	0.460606061	0.044444444	0.367676768	0.088888889
391	393	CUT031	chrII	+	TATA-less	TAF1-enriched	14	625366	625338	-28	CUT031	10.3	NULL	1	0.201939802	0.359305232	0.14972246	0.931726391	0.088675943	0.172722365	0.895810367
392	394	YBR202W	chrII	+	TATA-less	TAF1-depleted	717	625739	625707	-32	YBR202W	2562.4	NULL	0.261101437	0.042839137	0.138408493	0.659023837	0.173916672	0.659023837	0.06443412	0.659023837
393	395	YBR205W	chrII	+	TATA-less	TAF1-enriched	217	633639	633577	-62	YBR205W	2071.4	NULL	0.029184651	0.007473611	0.784889385	0.077974734	0.666143638	0.044001861	0.07542069	0.784889385
394	396	orphan	chrII	-	TATA-less	TAF1-enriched	18	634978	635032	-54	orphan	2.9	NULL	0.592909658	0.454174267	1	0.21386842	0.667916372	0.091628462	0.454174267	0.21386842
395	397	YBR207W	chrII	+	TATA-less	TAF1-enriched	442	635125	635061	-64	YBR207W	201.4	NULL	0.316764504	0.839844013	0.576150122	0.768624792	0.839844013	0.768624792	0.704233909	1
396	398	YBR208C	chrII	-	TATA-less	TAF1-depleted	101	642436	642596	-160	YBR208C	151.9	NULL	0.013624302	0.008246738	0.049491231	0.088675943	0.08830911	0.147232255	0.394107149	0.049491231
397	399	YBR209W	chrII	+	TATA-less	TAF1-enriched	3	642779	642745	-34	YBR209W	1.3	NULL	0.34765448	0.096319324	0.16585666	0.809149835	0.305507087	0.809149835	0.34765448	0.488422317
398	400	tC(GCA)B	chrII	-	TATA-less	-	427	643074	643088	-14	tC(GCA)B	14.4	NULL	0.751099126	0.794646803	0.588809187	0.228361945	1	0.784889385	0.727121344	0.784889385
399	401	YBR210W	chrII	+	TATA-less	TAF1-enriched	320	645553	645516	-37	YBR210W	1745.7	NULL	0.230364065	0.007910597	0.894849724	0.081865671	0.196353718	0.063431425	0.862242032	0.081865671
400	402	YBR211C	chrII	-	TATA-less	TAF1-enriched	281	647230	647229	1	YBR211C	269.1	NULL	0.037077191	0.074024444	0.288844366	0.430614455	0.340778614	0.049491231	1	0.895810367
401	403	YBR212W	chrII	+	TATA-less	TAF1-enriched	763	NA	647480	NA	YBR212W	538.7	NULL	0.495394415	0.19875925	0.238557044	0.238557044	0.194740405	0.693529129	0.394107149	1
402	404	YBR214W	chrII	+	TATA-less	TAF1-enriched	9974	651359	651352	-7	YBR214W	1259.6	NULL	0.658531366	0.008133895	1	0.048106828	0.93148272	0.048106828	0.008021847	0.894194334
403	405	YBR215W	chrII	+	TATA-less	TAF1-depleted	100	653354	653315	-39	YBR215W	89.3	NULL	0.931847255	0.86249023	0.690816272	0.506054349	0.929832618	0.691728538	0.606584521	0.595883091
404	406	YBR217W	chrII	+	TATA-less	TAF1-enriched	843	657811	657785	-26	YBR217W	178.4	NULL	0.723170339	0.040896073	0.871798602	1	0.737315677	0.888854163	0.583501956	0.871798602
405	407	YBR218C	chrII	-	TATA-less	TAF1-depleted	4976	662203	662396	-193	YBR218C	2136.5	NULL	0.033441628	0.442292754	1	0.238557044	0.798215076	1	0.798215076	0.048798093
406	408	CUT033	chrII	+	TATA-less	TAF1-enriched	2	662944	662845	-99	CUT033	11.4	NULL	0.394938074	0.931847255	0.177777778	1	0.460606061	1	0.460606061	0.533333333
407	409	YBR220C	chrII	-	TATA-less	TAF1-enriched	324	664696	664744	-48	YBR220C	751.2	NULL	0.009634461	0.606584521	0.354866599	0.353367292	0.010030543	0.145981945	0.297569609	0.046730149
408	410	YBR221C	chrII	-	TATA-less	TAF1-enriched	34554	666416	666456	-40	YBR221C	17937.7	NULL	0.861741578	0.191490579	0.595883091	0.046730149	0.329076491	0.046730149	0.007910597	0.503357576
409	411	YBR222C	chrII	-	TATA-containing	TAF1-depleted	788	668364	668388	-24	YBR222C	375	NULL	1	0.049238968	0.005188608	NaN	0.001556573	NaN	NaN	0.004915802
410	412	YBR228W	chrII	+	TATA-less	TAF1-enriched	215	675373	675313	-60	YBR228W	164.9	NULL	0.550817954	0.012652434	0.424874689	1	0.443097314	0.28733307	0.256747856	0.790241066
411	413	YBR229C	chrII	-	TATA-less	TAF1-enriched	1454	679210	679230	-20	YBR229C	582.7	NULL	0.006842389	0.006842389	0.193930852	0.295641821	0.065817128	0.887685742	0.926139926	0.295641821
412	414	YBR230C	chrII	-	TATA-containing	TAF1-enriched	9978	680061	680076	-15	YBR230C	629.6	NULL	0.103570182	0.394107149	0.1484791	0.049491231	0.048783581	0.048798093	0.010434401	0.1484791
413	415	orphan	chrII	+	TATA-less	TAF1-enriched	42	680949	680940	-9	orphan	1.2	NULL	0.692632784	NA	0.692632784	NA	0.359012054	0.100209512	0.854445068	0.411313792
414	416	orphan	chrII	-	TATA-containing	TAF1-depleted	258364	681841	681862	-21	orphan	120524.9	NULL	NaN	0.049238968	NaN	NaN	NaN	NaN	NaN	NaN
415	417	CUT034	chrII	+	TATA-less	TAF1-enriched	22	682256	682194	-62	CUT034	2.5	NULL	0.016939934	0.22251223	0.085711672	0.181358276	0.22976627	0.085711672	0.510019168	0.662520584
416	418	YBR231C	chrII	-	TATA-less	TAF1-enriched	175	683098	683144	-46	YBR231C	187.4	NULL	1	0.926292884	1	0.228361945	1	0.676082741	0.791651777	0.06013513
417	419	YBR233W-A	chrII	+	TATA-less	TAF1-enriched	475	684985	684944	-41	YBR233W-A	694.6	NULL	0.438217981	0.007910597	0.142210424	0.484695003	0.020713285	0.588809187	0.25586886	0.084784996
418	420	YBR234C	chrII	-	TATA-less	TAF1-enriched	1828	686567	686629	-62	YBR234C	1507	NULL	0.009454169	0.049238968	1	NaN	0.433848066	NaN	0.050186187	0.004915802
419	421	YBR236C	chrII	-	TATA-less	TAF1-enriched	802	691698	691731	-33	YBR236C	341.3	NULL	0.007049543	0.137328714	0.301326595	0.042651237	0.016387834	0.042651237	0.072067362	0.301326595
420	422	YBR237W	chrII	+	TATA-less	TAF1-enriched	83	691973	691932	-41	YBR237W	267.6	NULL	0.039064406	0.097408871	0.135857322	0.135857322	0.036325106	0.501992689	1	0.501992689
421	423	YBR238C	chrII	-	TATA-less	TAF1-enriched	8079	697228	697302	-74	YBR238C	8780.1	NULL	0.02741654	0.007581651	0.595883091	0.046730149	0.204413415	0.046730149	0.104184357	0.210044337
422	424	ST0237	chrII	+	TATA-less	TAF1-enriched	58	697917	697874	-43	ST0237	128.7	NULL	0.808080808	0.682828283	0.694417686	0.793389781	0.170447443	0.793389781	0.394938074	0.4
423	425	orphan	chrII	+	TATA-less	TAF1-enriched	39	697917	697901	-16	orphan	151.3	NULL	0.007366379	0.046784411	0.042651237	0.329609605	0.545100219	0.345717816	0.56907313	1
424	426	YBR242W	chrII	+	TATA-containing	TAF1-enriched	3479	704553	704511	-42	YBR242W	1101.2	NULL	0.443097314	0.008246738	0.048106828	0.137134544	0.033131861	0.291840545	0.118361567	0.048798093
425	427	YBR243C	chrII	-	TATA-less	TAF1-enriched	80	706771	706846	-75	YBR243C	673.1	NULL	0.047182916	0.047182916	1	0.588809187	0.044802434	0.588809187	0.534549972	0.110492024
426	428	orphan	chrII	+	TATA-less	TAF1-enriched	440	707524	707449	-75	orphan	970.7	NULL	0.106024499	0.551517708	0.085758003	0.085758003	0.008246738	0.694417686	0.037077191	0.359305232
427	429	YBR244W	chrII	+	TATA-containing	TAF1-depleted	1257	707524	707475	-49	YBR244W	977.1	NULL	0.106024499	0.551517708	0.14972246	0.085758003	0.008246738	0.694417686	0.037077191	0.512610438
428	430	YBR246W	chrII	+	TATA-less	TAF1-depleted	87	711612	711548	-64	YBR246W	689.2	NULL	1	0.016639137	0.048798093	0.065086726	0.007154342	0.357835467	0.224501127	0.048798093
429	431	YBR247C	chrII	-	TATA-less	TAF1-depleted	89	714449	714476	-27	YBR247C	1020	NULL	0.931726391	0.010434401	1	0.693529129	0.932087071	0.694417686	0.603331772	0.693529129
430	432	CUT037	chrII	+	TATA-less	TAF1-enriched	133	714730	714714	-16	CUT037	31.1	NULL	0.496151813	1	0.600401848	0.711111111	0.668938973	0.600401848	0.609758799	0.711111111
431	433	YBR248C	chrII	-	TATA-less	TAF1-depleted	285	716497	716561	-64	YBR248C	500.3	NULL	0.026179124	0.345126713	0.511319908	0.18763233	0.93196748	0.234230702	0.33901613	0.237122014
432	434	YBR249C	chrII	-	TATA-less	TAF1-enriched	2455	717939	718084	-145	YBR249C	6922.7	NULL	0.006240605	0.006143194	0.767755389	0.03605437	0.005855932	0.03605437	0.017010283	0.419740503
433	435	orphan	chrII	+	TATA-less	TAF1-enriched	96	718452	718405	-47	orphan	26.9	NULL	0.808080808	0.367676768	0.600401848	1	0.394938074	0.4	0.933333333	0.888888889
434	436	YBR251W	chrII	+	TATA-less	TAF1-enriched	101	721378	721354	-24	YBR251W	657.7	NULL	0.311071854	0.007455462	0.015494295	0.802587349	0.10666884	0.802587349	0.214542019	0.015494295
435	437	YBR252W	chrII	+	TATA-containing	TAF1-enriched	4425	722635	722593	-42	YBR252W	2705.2	NULL	0.00604661	0.185728553	0.139793337	0.03605437	0.045789833	0.03605437	0.005855932	0.419740503
436	439	YBR255C-A	chrII	-	TATA-less	TAF1-enriched	8070	727067	727111	-44	YBR255C-A	277.1	NULL	0.169686101	0.221953283	0.894523556	0.046730149	0.931726391	0.046730149	0.010030543	1
437	440	YBR256C	chrII	-	TATA-containing	TAF1-enriched	765	728094	728110	-16	YBR256C	12755.6	NULL	0.006842389	0.010808775	0.470486422	0.295641821	0.045197383	0.208468351	0.012980572	0.295641821
438	441	YBR257W	chrII	+	TATA-less	TAF1-enriched	480	728886	728854	-32	YBR257W	284.2	NULL	1	0.004040404	0.600401848	0.693529129	0.394107149	0.895493084	0.863951761	0.190345809
439	442	YBR258C	chrII	-	TATA-less	TAF1-enriched	46	730139	730200	-61	YBR258C	307.2	NULL	0.060816949	0.146700539	0.512610438	0.114961001	0.024343384	0.049491231	0.548699	0.114961001
440	443	YBR261C	chrII	-	TATA-less	TAF1-enriched	503	735510	735567	-57	YBR261C	948.2	NULL	0.013503763	0.010957184	0.772829993	0.654001121	0.578853817	1	0.853213423	0.654001121
441	444	YBR262C	chrII	-	TATA-containing	TAF1-enriched	180	736030	736079	-49	YBR262C	1662	NULL	0.006945558	0.437392462	0.690816272	0.893526535	0.19875925	0.68989587	0.300448558	0.047417494
442	445	YBR264C	chrII	-	TATA-less	TAF1-enriched	260	738322	738372	-50	YBR264C	259.7	NULL	1	0.088116673	0.786943898	0.786943898	0.724174148	0.686130413	0.927483281	1
443	446	YBR265W	chrII	+	TATA-less	TAF1-enriched	63	738750	738593	-157	YBR265W	1858.1	NULL	0.007690497	0.007366379	0.687084608	0.046044853	0.521551992	0.132006336	0.652946182	1
444	447	YBR267W	chrII	+	TATA-less	TAF1-enriched	284	739869	739824	-45	YBR267W	368.9	NULL	0.101109741	0.716367317	0.790241066	0.279641534	0.795737098	0.790241066	0.930481276	0.894523556
445	448	YBR268W	chrII	+	TATA-less	TAF1-enriched	280	741337	741285	-52	YBR268W	1031.7	NULL	0.044840911	0.360824879	0.034132951	0.034132951	0.00576184	0.034132951	0.308863582	0.033499083
446	449	YBR269C	chrII	-	TATA-less	TAF1-enriched	335	742398	742553	-155	YBR269C	3234.6	NULL	0.005576156	0.540291375	0.034132951	0.413176151	1	1	0.561275836	0.033499083
447	450	YBR271W	chrII	+	TATA-less	TAF1-enriched	1296	744879	744826	-53	YBR271W	207	NULL	0.791268113	0.595883091	0.872382973	0.872382973	0.052051328	0.070213707	0.507411142	0.872382973
448	451	YBR272C	chrII	-	TATA-containing	TAF1-enriched	48	747786	747818	-32	YBR272C	135.8	NULL	0.724174148	1	0.588809187	0.125525756	0.318700276	0.686130413	0.658531366	0.676082741
449	452	YBR275C	chrII	-	TATA-less	TAF1-enriched	52	NA	757215	NA	YBR275C	119.4	NULL	0.348546687	0.008246738	1	0.894523556	0.104798141	0.14472819	0.012812142	0.790241066
450	453	orphan	chrII	-	TATA-less	TAF1-enriched	15	760848	760897	-49	orphan	43.4	NULL	0.440673311	0.056297	0.786943898	1	0.102955624	0.594729336	0.225345694	0.892152103
451	454	YBR279W	chrII	+	TATA-less	TAF1-enriched	1353	761287	761229	-58	YBR279W	343.1	NULL	0.016387834	0.020574259	0.484695003	0.139793337	0.533768205	0.887685742	0.296517172	0.03605437
452	455	orphan	chrII	-	TATA-containing	TAF1-enriched	358	764691	764710	-19	orphan	319.6	NULL	0.434894327	0.140232086	0.137134544	0.175157922	0.030382822	0.042651237	0.784826196	0.301326595
453	456	YBR281C	chrII	-	TATA-less	TAF1-enriched	310	767616	767659	-43	YBR281C	383.5	NULL	0.004782003	0.927191096	0.02677094	0.573775404	0.004532406	0.623433341	0.609834044	0.026183688
454	457	YBR282W	chrII	+	TATA-less	TAF1-depleted	986	768243	768197	-46	YBR282W	1355.3	NULL	0.189854027	0.006740038	0.35033841	0.080892654	0.189854027	0.080892654	0.006740038	0.35033841
455	458	YBR283C	chrII	-	TATA-less	TAF1-depleted	10014	770561	770559	2	YBR283C	19767	NULL	0.001556573	0.001688186	0.005188608	0.004915802	0.001556573	0.005188608	NaN	0.005188608
456	459	orphan	chrII	+	TATA-less	TAF1-depleted	41	770892	770874	-18	orphan	59.6	NULL	0.60913007	0.544370146	0.065915952	0.188991722	0.267926383	0.694417686	0.733196121	0.359305232
457	460	YBR284W	chrII	+	TATA-less	TAF1-enriched	519	771277	771244	-33	YBR284W	1029.5	NULL	0.04128299	0.233910901	0.036701192	0.882614174	0.65669965	0.06635304	0.503677558	0.124220661
458	461	YBR286W	chrII	+	TATA-containing	TAF1-depleted	2715	774727	774687	-40	YBR286W	3335.8	NULL	0.007049543	0.331829403	0.044001861	0.044001861	0.007473611	0.04332537	0.007473611	0.044001861
459	462	YBR287W	chrII	+	TATA-containing	TAF1-depleted	3536	776560	776538	-22	YBR287W	2865	NULL	0.009938798	0.015372288	0.06635304	0.871798602	0.790882323	0.299445905	1	0.888854163
460	463	YBR289W	chrII	+	TATA-less	TAF1-enriched	92	779717	779653	-64	YBR289W	2064.3	NULL	0.435236127	0.001556573	1	NaN	0.001556573	0.004915802	0.215924939	0.004915802
461	464	YBR290W	chrII	+	TATA-containing	TAF1-enriched	1327	782628	782584	-44	YBR290W	4185	NULL	0.002685983	0.010395845	0.802587349	0.136037128	0.057346852	0.348501424	0.011821138	0.015494295
462	465	YBR291C	chrII	-	TATA-less	TAF1-enriched	112	784580	784608	-28	YBR291C	184.6	NULL	0.199557256	0.297817462	0.691728538	0.595883091	1	0.063431425	0.863951761	0.426325543
463	466	CUT039	chrII	+	TATA-containing	TAF1-enriched	4	784875	784790	-85	CUT039	2.8	NULL	1	1	0.571428571	0.642857143	0.160642484	0.17980963	0.476190476	1
464	467	ST0269	chrII	+	TATA-less	TAF1-enriched	21	785471	785441	-30	ST0269	40.9	NULL	1	0.544370146	0.356355957	0.359305232	0.172722365	0.508708087	0.798561763	0.359305232
465	468	orphan	chrII	+	TATA-less	TAF1-enriched	31	786030	785970	-60	orphan	53.8	NULL	0.061271395	0.233663465	0.793389781	0.4	0.733646789	0.600401848	1	0.600401848
466	469	orphan	chrII	-	TATA-containing	TAF1-enriched	396	786468	786561	-93	orphan	116.6	NULL	0.729506525	0.19875925	0.787615767	1	0.204413415	0.354866599	0.797516299	1
467	470	ST3913	chrII	-	TATA-less	TAF1-enriched	455	786824	786870	-46	ST3913	142.8	NULL	0.086067568	0.015128341	0.046730149	0.786943898	0.343397338	0.14472819	0.290664411	0.183522244
468	471	YBR293W	chrII	+	TATA-less	TAF1-enriched	264	787110	787097	-13	YBR293W	122.2	NULL	0.030684702	0.030382822	1	0.079919784	0.338129828	0.079919784	0.855850327	0.892845929
469	472	orphan	chrII	-	TATA-less	TAF1-enriched	49	792040	792057	-17	orphan	251.4	NULL	0.104798141	0.931359902	0.048798093	0.895493084	0.021396137	0.048798093	0.263680873	0.048798093
470	473	ST3914	chrII	-	TATA-less	TAF1-enriched	55	NA	792560	NA	ST3914	49	NULL	0.024602777	0.007581651	0.595883091	0.595883091	0.146954165	0.426325543	0.43573066	0.508708087
471	474	YBR295W	chrII	+	TATA-containing	TAF1-enriched	309	792850	792833	-17	YBR295W	177	NULL	0.193119366	0.127034907	0.888854163	0.484695003	0.478273056	0.042651237	0.127034907	0.657788651
472	475	YBR296C	chrII	-	TATA-containing	TAF1-depleted	632	798482	798590	-108	YBR296C	1130.3	NULL	0.524902502	0.004952607	0.027362545	0.055859225	0.004133256	0.421881247	0.266348222	0.02677094
473	476	YBR297W	chrII	+	TATA-less	TAF1-enriched	126	800510	800487	-23	YBR297W	200.1	NULL	0.349393711	0.670037641	0.694417686	1	0.603331772	1	0.30562919	0.894523556
474	477	YBR298C	chrII	-	TATA-containing	TAF1-enriched	197	804871	804888	-17	YBR298C	100.2	NULL	0.003329187	0.003329187	0.015975041	0.136037128	0.003261123	0.263552477	0.146100466	0.015975041
475	478	orphan	chrII	-	TATA-containing	TAF1-enriched	29	NA	807161	NA	orphan	0.4	NULL	NA	0.408351969	1	0.583882421	0.435279343	NA	NA	1
476	479	orphan	chrII	+	TATA-containing	TAF1-enriched	9	NA	807368	NA	orphan	0.3	NULL	1	1	NA	1	1	NA	1	0.617075077
477	480	YCL064C	chrIII	-	TATA-containing	TAF1-depleted	5685	NA	16894	NA	YCL064C	402.8	NULL	0.439039945	1	0.232774339	0.598161453	0.021167585	0.065086726	0.862982628	0.048106828
478	481	YCL063W	chrIII	+	TATA-less	TAF1-enriched	934	17319	17274	-45	YCL063W	666	NULL	0.659135465	0.286089935	0.892152103	0.484695003	0.666143638	0.484695003	0.859683795	1
479	482	YCL061C	chrIII	-	TATA-less	TAF1-enriched	892	22110	22144	-34	YCL061C	28.3	NULL	0.808080808	1	0.888888889	0.116073943	1	0.533333333	0.56969697	0.711111111
480	483	orphan	chrIII	-	TATA-containing	TAF1-enriched	58	22480	22525	-45	orphan	103.6	NULL	0.668938973	0.226187914	0.894849724	1	0.607225552	0.691728538	0.39159429	0.508708087
481	484	YCL059C	chrIII	-	TATA-less	TAF1-depleted	615	23344	23404	-60	YCL059C	42.7	NULL	0.307332348	0.004040404	0.888888889	0.044444444	0.282828283	0.044444444	0.214141414	0.533333333
482	485	YCL058W-A	chrIII	+	TATA-less	TAF1-enriched	159	23624	23562	-62	YCL058W-A	10.1	NULL	0.670582894	0.932206034	0.114961001	0.895810367	0.19875925	0.188991722	0.551517708	1
483	486	YCL057C-A	chrIII	-	TATA-less	TAF1-enriched	7479	24311	24352	-41	YCL057C-A	366.4	NULL	0.443898466	0.050394337	0.14972246	0.049491231	0.060816949	0.049491231	0.268767553	0.14972246
484	487	YCL057W	chrIII	+	TATA-less	TAF1-enriched	24403	24805	24782	-23	YCL057W	0.6	NULL	0.592560277	0.37245587	NA	0.345778586	1	1	1	0.683091398
485	488	YCL056C	chrIII	-	TATA-less	TAF1-depleted	26	27313	27540	-227	YCL056C	0.3	NULL	1	1	NA	0.617075077	0.617075077	NA	1	NA
486	489	YCL055W	chrIII	+	TATA-less	TAF1-depleted	503	27956	27934	-22	YCL055W	21.6	NULL	0.349393711	0.268767553	0.895810367	0.691728538	0.798215076	0.049491231	0.932206034	0.512610438
487	490	CUT460	chrIII	-	TATA-containing	TAF1-enriched	9	28914	28961	-47	CUT460	76.3	NULL	0.56969697	0.798561763	0.888888889	0.888888889	0.609758799	0.711111111	0.496151813	0.888888889
488	492	orphan	chrIII	+	TATA-less	TAF1-enriched	51	NA	29618	NA	orphan	8.7	NULL	0.668938973	0.441484761	0.145981945	0.354866599	0.668938973	0.554601532	0.226187914	1
489	493	CUT461	chrIII	-	TATA-less	TAF1-depleted	1	30274	30388	-114	CUT461	22.9	NULL	1	0.153535354	1	0.294801992	0.443898466	0.533333333	0.08830911	1
490	494	CUT462	chrIII	-	TATA-containing	TAF1-enriched	104	31141	31197	-56	CUT462	0.7	NULL	0.637351888	1	1	NA	0.824778095	1	0.637351888	0.637351888
491	495	YCL054W	chrIII	+	TATA-less	TAF1-enriched	288	31445	31418	-27	YCL054W	7.2	NULL	0.670582894	0.932206034	0.138408493	0.694417686	0.670582894	0.895810367	0.733196121	0.895810367
492	496	YCL051W	chrIII	+	TATA-less	TAF1-enriched	352	35623	35580	-43	YCL051W	21.1	NULL	0.808080808	0.808080808	0.711111111	0.533333333	0.367676768	0.533333333	1	1
493	497	YCL050C	chrIII	-	TATA-less	TAF1-enriched	4710	38819	38863	-44	YCL050C	1.5	NULL	0.048884634	0.012780671	0.795297884	0.339727776	0.581169476	NA	0.684469821	0.339727776
494	498	CUT040	chrIII	+	TATA-less	TAF1-enriched	326	39226	39137	-89	CUT040	2.5	NULL	0.340616892	0.389284273	0.533829422	NA	0.541192899	NA	0.368227134	0.845078498
495	499	YCL049C	chrIII	-	TATA-less	TAF1-enriched	718	40733	40779	-46	YCL049C	35.9	NULL	0.56969697	0.367676768	0.711111111	1	0.56969697	0.266666667	0.808080808	1
496	500	YCL047C	chrIII	-	TATA-less	TAF1-enriched	605	44419	44448	-29	YCL047C	0.3	NULL	0.617075077	0.218819416	NaN	NaN	NaN	NA	NaN	0.479500122
497	501	YCL045C	chrIII	-	TATA-containing	TAF1-enriched	5901	46894	46954	-60	YCL045C	3.6	NULL	0.849768971	0.448658835	0.141565039	0.333333333	0.392932047	0.882642395	0.833333333	0.556535549
498	502	YCL044C	chrIII	-	TATA-less	TAF1-enriched	3284	48385	48413	-28	YCL044C	0	NA	NA	NA	NA	NA	NA	NA	NA	NA
499	503	YCL043C	chrIII	-	TATA-containing	TAF1-enriched	29465	50242	50258	-16	YCL043C	44.3	NULL	0.933333333	0.307332348	1	0.088888889	0.367676768	0.711111111	0.609758799	0.14972246
500	504	YCL040W	chrIII	+	TATA-containing	TAF1-depleted	31364	50921	50803	-118	YCL040W	0.1	NULL	NA	1	NA	NaN	NA	NA	NaN	NA
501	505	YCL039W	chrIII	+	TATA-less	TAF1-enriched	403	52669	52611	-58	YCL039W	4.3	NULL	0.833333333	0.927272727	0.25	0.25	0.412121212	0.333333333	1	0.5
502	506	YCL038C	chrIII	-	TATA-less	TAF1-enriched	242	NA	56595	NA	YCL038C	0.6	NULL	0.553616992	0.100209512	NA	1	0.666666667	0.666666667	1	NA
503	507	YCL037C	chrIII	-	TATA-less	TAF1-enriched	26597	58698	58745	-47	YCL037C	2493.3	NULL	0.006240605	0.042059394	0.299445905	0.035410671	0.216295202	0.112351198	0.083769261	0.871798602
504	508	YCL036W	chrIII	+	TATA-less	TAF1-enriched	40	59031	59018	-13	YCL036W	86.8	NULL	0.009118593	0.036700635	0.075059873	0.301326595	0.006842389	0.124220661	0.128645924	0.042651237
505	509	YCL035C	chrIII	-	TATA-containing	TAF1-depleted	6818	61173	61237	-64	YCL035C	6.6	NULL	0.917770891	1	0.894523556	1	0.259395539	1	0.472939663	0.693529129
506	510	YCL034W	chrIII	+	TATA-containing	TAF1-enriched	2288	61670	61608	-62	YCL034W	0	NA	NA	NA	NA	NA	NA	NA	NA	NA
507	511	YCL032W	chrIII	+	TATA-less	TAF1-enriched	201	63457	63388	-69	YCL032W	0	NA	NA	NA	NA	NA	NA	NA	NA	NA
508	512	YCL031C	chrIII	-	TATA-less	TAF1-enriched	841	65573	65601	-28	YCL031C	39.5	NULL	0.072727273	0.008080808	0.177777778	0.533333333	0.153535354	0.177777778	0.048484848	0.177777778
509	513	YCL030C	chrIII	-	TATA-less	TAF1-depleted	2220	68366	68393	-27	YCL030C	1.1	NULL	1	0.183150203	1	1	0.696466486	0.692632784	1	NA
510	514	CUT041	chrIII	+	TATA-less	TAF1-enriched	89	68962	68944	-18	CUT041	3.3	NULL	0.741433202	0.748381212	NA	0.436385231	0.401840684	NA	0.027531894	0.6084078
511	515	YCL029C	chrIII	-	TATA-less	TAF1-enriched	34	NA	69959	NA	YCL029C	1349.5	NULL	0.550817954	0.049587742	0.1484791	0.507386527	0.550114935	0.357835467	0.863711407	0.147232255
512	516	YCL027W	chrIII	+	TATA-less	TAF1-depleted	62	71892	71782	-110	YCL027W	122.8	NULL	0.367676768	0.460606061	0.888888889	0.190345809	0.609758799	0.533333333	0.808080808	0.888888889
513	517	orphan	chrIII	+	TATA-less	TAF1-enriched	5	74696	74645	-51	orphan	0	NA	NA	NA	NA	NA	NA	NA	NA	NA
514	518	YCL025C	chrIII	-	TATA-containing	TAF1-depleted	2700	77887	77950	-63	YCL025C	6	NULL	0.798215076	0.732287883	0.511319908	1	0.932087071	0.693529129	0.798215076	0.511319908
515	519	orphan	chrIII	-	TATA-less	TAF1-enriched	1390	78103	78209	-106	orphan	9.4	NULL	0.201147528	0.932087071	0.357835467	0.895493084	0.798215076	0.693529129	0.201147528	0.357835467
516	520	YCL024W	chrIII	+	TATA-less	TAF1-enriched	98	79132	79100	-32	YCL024W	0.1	NA	NA	NA	NA	NA	NA	NA	NA	NA
517	521	orphan	chrIII	-	TATA-less	TAF1-enriched	892	82460	82545	-85	orphan	0.8	NULL	NaN	0.06360257	NaN	NA	0.414216178	0.414216178	NaN	NA
518	522	YCL017C	chrIII	-	TATA-less	TAF1-enriched	1889	94325	94380	-55	YCL017C	9.4	NULL	0.933333333	1	0.533333333	1	0.56969697	0.432023291	0.733646789	0.793389781
519	523	YCL016C	chrIII	-	TATA-less	TAF1-enriched	3473	95750	95795	-45	YCL016C	19.9	NULL	0.346843113	0.549408625	0.508708087	0.691728538	0.346843113	0.288844366	0.266236144	0.894849724
520	524	YCL014W	chrIII	+	TATA-less	TAF1-enriched	854	96214	96184	-30	YCL014W	0.4	NULL	NA	0.563702862	NA	NA	NaN	NA	NaN	NaN
521	525	YCL011C	chrIII	-	TATA-less	TAF1-enriched	1235	103339	103385	-46	YCL011C	0	NA	NA	NA	NA	NA	NA	NA	NA	NA
522	526	YCL010C	chrIII	-	TATA-less	TAF1-enriched	267	104331	104370	-39	YCL010C	2502.3	NULL	0.005393812	0.005393812	0.03605437	0.283876475	0.015172523	0.283876475	0.286844064	0.112351198
523	527	YCL009C	chrIII	-	TATA-less	TAF1-enriched	24848	105523	105566	-43	YCL009C	0	NA	NA	NA	NA	NA	NA	NA	NA	NA
524	528	CUT042	chrIII	+	TATA-less	TAF1-enriched	31	105968	105828	-140	CUT042	21.2	NULL	0.367676768	0.933333333	0.711111111	0.711111111	0.933333333	0.533333333	0.682828283	0.533333333
525	529	YCL008C	chrIII	-	TATA-less	TAF1-depleted	430	106811	106864	-53	YCL008C	0	NA	NA	NA	NA	NA	NA	NA	NA	NA
526	530	orphan	chrIII	+	TATA-less	TAF1-enriched	16	107586	107498	-88	orphan	5.2	NULL	0.774812202	0.817520603	0.168806954	0.456611839	0.633497344	0.168806954	0.774812202	1
527	531	YCL005W	chrIII	+	TATA-less	TAF1-enriched	1328	108038	107975	-63	YCL005W	26.4	NULL	0.933333333	0.864900617	0.793389781	0.4	0.348546687	1	0.733646789	1
528	532	orphan	chrIII	+	TATA-less	TAF1-enriched	1424	109259	109094	-165	orphan	10.5	NULL	0.356038264	0.070004983	0.540817904	1	0.439097607	1	1	0.881642405
529	533	YCL001W	chrIII	+	TATA-less	TAF1-enriched	400	111911	111909	-2	YCL001W	690.7	NULL	0.216793336	0.129595844	0.125525756	0.303193256	0.297817462	0.279641534	0.129595844	0.417455426
530	534	ST3953	chrIII	-	TATA-less	TAF1-enriched	8	NA	114334	NA	ST3953	4.2	NULL	0.441360784	0.748381212	0.436385231	0.436385231	0.401840684	NA	0.393153438	1
531	535	YCR002C	chrIII	-	TATA-less	TAF1-enriched	2067	118351	118393	-42	YCR002C	8.3	NULL	0.670582894	0.201939802	0.088675943	0.234230702	0.932206034	0.512610438	1	0.238557044
532	536	YCR003W	chrIII	+	TATA-less	TAF1-enriched	101	118648	118598	-50	YCR003W	0.9	NULL	0.751829634	0.015078498	0.488422317	NA	0.468716582	1	0.605576616	1
533	537	orphan	chrIII	+	TATA-less	TAF1-enriched	882	120296	120152	-144	orphan	2.9	NULL	0.158084651	0.099877403	0.500616604	0.345717816	0.01627592	0.04332537	0.16585666	0.22538387
534	538	YCR004C	chrIII	-	TATA-containing	TAF1-enriched	1463	120505	120541	-36	YCR004C	188.5	NULL	0.460606061	0.173477636	0.4	0.044444444	0.173477636	0.266666667	0.733646789	0.711111111
535	539	orphan	chrIII	+	TATA-containing	TAF1-enriched	17	120963	120802	-161	orphan	0	NA	NA	NA	NA	NA	NA	NA	NA	NA
536	540	YCR005C	chrIII	-	TATA-containing	TAF1-depleted	1121	122164	122385	-221	YCR005C	3.8	NULL	0.367676768	1	0.190345809	0.600401848	1	0.044444444	0.496969697	1
537	541	ST0304	chrIII	+	TATA-less	TAF1-enriched	1143	123374	123367	-7	ST0304	0.9	NULL	NA	0.374259319	NA	1	0.642834826	0.746885633	1	1
538	542	orphan	chrIII	+	TATA-less	TAF1-enriched	35	124116	124056	-60	orphan	0.7	NULL	1	1	0.666666667	NA	0.220671362	0.220671362	0.767096868	0.666666667
539	543	orphan	chrIII	-	TATA-less	TAF1-enriched	178	124960	125011	-51	orphan	25.2	NULL	0.56969697	0.56969697	1	0.888888889	0.282828283	0.4	0.56969697	0.533333333
540	544	YCR007C	chrIII	-	TATA-less	TAF1-enriched	87	126344	126342	2	YCR007C	66.2	NULL	1	0.074024444	0.088675943	0.895810367	0.798561763	0.14972246	0.201939802	0.895810367
541	545	YCR008W	chrIII	+	TATA-containing	TAF1-depleted	1762	NA	128027	NA	YCR008W	2.1	NULL	NA	0.109855243	0.533829422	0.171370997	1	0.840730447	0.389284273	0.693281818
542	546	YCR009C	chrIII	-	TATA-less	TAF1-enriched	629	131550	131585	-35	YCR009C	276.2	NULL	0.601341104	0.024343384	0.234230702	0.691728538	0.859946052	0.288844366	0.071997747	0.235679913
543	547	CUT044	chrIII	+	TATA-less	TAF1-enriched	18	NA	131848	NA	CUT044	0.5	NULL	0.504985075	NaN	NaN	0.414216178	0.504985075	NA	NaN	0.248213079
544	548	YCR011C	chrIII	-	TATA-less	TAF1-enriched	288	136786	136961	-175	YCR011C	0	NA	NA	NA	NA	NA	NA	NA	NA	NA
545	549	YCR012W	chrIII	+	TATA-containing	TAF1-depleted	7511	137821	137706	-115	YCR012W	869.7	NULL	0.128902119	0.006326683	0.105671625	0.139793337	0.054497048	0.139793337	0.543329872	0.301326595
546	550	YCR013C	chrIII	-	TATA-less	TAF1-enriched	16	138882	139023	-141	YCR013C	12.5	NULL	0.367676768	0.214141414	0.533333333	0.888888889	0.214141414	0.888888889	0.214141414	0.533333333
547	551	CUT045	chrIII	+	TATA-less	TAF1-enriched	61	139361	139334	-27	CUT045	0.9	NULL	1	1	1	0.617075077	1	1	1	0.666666667
548	552	YCR015C	chrIII	-	TATA-less	TAF1-enriched	456	142124	142397	-273	YCR015C	0	NA	NA	NA	NA	NA	NA	NA	NA	NA
549	553	orphan	chrIII	+	TATA-containing	TAF1-depleted	0	142761	142733	-28	orphan	9.6	NULL	0.571428571	0.035714286	0.078642897	0.571428571	0.73015873	0.666666667	0.73015873	0.857142857
550	554	tG(GCC)C	chrIII	+	TATA-less	-	0	NA	142832	NA	tG(GCC)C	10	NULL	0.628571429	0.057142857	0.100209512	0.133333333	0.2	0.100209512	0.057142857	0.133333333
551	555	YCR016W	chrIII	+	TATA-less	TAF1-enriched	1679	143651	143608	-43	YCR016W	7	NULL	1	0.60952381	0.571428571	0.065132958	0.428571429	0.571428571	0.476190476	0.428571429
552	556	YCR017C	chrIII	-	TATA-less	TAF1-enriched	4869	147635	147663	-28	YCR017C	22.7	NULL	1	0.551517708	0.559635263	0.694417686	0.348546687	0.359305232	1	0.512610438
553	558	orphan	chrIII	-	TATA-less	TAF1-enriched	96	148540	148561	-21	orphan	225.2	NULL	0.493869431	0.019153411	0.894194334	0.135857322	0.070985635	0.506054349	0.168158868	0.147232255
554	559	orphan	chrIII	+	TATA-less	TAF1-enriched	0	NA	152289	NA	orphan	6.4	NULL	0.453355505	0.21874201	0.241032444	0.159512015	0.73015873	0.380952381	0.19047619	0.380952381
555	560	YCR019W	chrIII	+	TATA-less	TAF1-enriched	96	152839	152711	-128	YCR019W	13.6	NULL	0.496151813	0.56969697	0.294801992	0.177777778	0.808080808	0.888888889	0.282828283	0.177777778
556	561	YCR021C	chrIII	-	TATA-containing	TAF1-depleted	1691	156986	157207	-221	YCR021C	9.8	NULL	0.109090909	1	0.666666667	0.222222222	1	1	0.315151515	0.222222222
557	562	YCR022C	chrIII	-	TATA-less	TAF1-enriched	43	157657	157772	-115	YCR022C	6.1	NULL	0.460606061	0.443898466	0.711111111	1	0.933333333	0.4	0.808080808	1
558	563	orphan	chrIII	+	TATA-less	TAF1-enriched	295	158688	158609	-79	orphan	593	NULL	0.104184357	0.007690497	0.083811901	0.048106828	0.007049543	0.048106828	0.036325106	0.047417494
559	564	YCR023C	chrIII	-	TATA-less	TAF1-enriched	474	160401	160450	-49	YCR023C	4.6	NULL	0.106024499	0.125042727	0.792771379	0.359305232	0.668938973	0.359305232	0.201939802	1
560	565	YCR024C-A	chrIII	-	TATA-containing	TAF1-depleted	1857	162983	163275	-292	YCR024C-A	45	NULL	0.088869286	0.233663465	1	0.177777778	0.609758799	0.088888889	0.173477636	1
561	566	orphan	chrIII	-	TATA-less	TAF1-enriched	45	163594	163697	-103	orphan	28.4	NULL	0.609758799	0.394938074	0.888888889	0.4	0.808080808	0.4	0.682828283	0.888888889
562	567	YCR026C	chrIII	-	TATA-containing	TAF1-enriched	43	166358	166413	-55	YCR026C	11.9	NULL	0.307332348	0.808080808	0.4	1	0.460606061	0.266666667	0.061271395	0.4
563	568	YCR027C	chrIII	-	TATA-less	TAF1-depleted	488	168134	168199	-65	YCR027C	0.3	NULL	NaN	NaN	NA	NA	NA	NA	NaN	NA
564	569	tQ(UUG)C	chrIII	+	TATA-less	-	0	168563	168440	-123	tQ(UUG)C	0.6	NULL	1	0.767096868	NA	0.683091398	NA	0.683091398	1	1
565	570	orphan	chrIII	-	TATA-less	TAF1-enriched	12	169173	169230	-57	orphan	10.8	NULL	0.473951968	0.268767553	0.173441705	0.694417686	0.670582894	0.895810367	0.798561763	0.694417686
566	571	YCR028C	chrIII	-	TATA-containing	TAF1-enriched	1265	172426	172493	-67	YCR028C	3.2	NULL	0.201939802	0.033441628	0.088675943	1	0.545100219	0.354866599	0.798561763	0.359305232
567	572	orphan	chrIII	-	TATA-containing	TAF1-enriched	3	172715	172816	-101	orphan	10.6	NULL	0.460606061	0.933333333	0.888888889	1	1	0.533333333	0.394938074	0.888888889
568	573	YCR028C-A	chrIII	-	TATA-less	TAF1-enriched	1252	173418	173502	-84	YCR028C-A	9.2	NULL	0.307332348	0.443898466	0.177777778	0.177777778	0.56969697	0.294801992	0.609758799	0.888888889
569	574	YCR030C	chrIII	-	TATA-less	TAF1-enriched	278	176482	176517	-35	YCR030C	7.3	NULL	0.748381212	0.454174267	0.401840684	0.86439478	0.914061959	1	1	1
570	575	ST3981	chrIII	-	TATA-less	TAF1-depleted	75	176880	176904	-24	ST3981	9.9	NULL	0.460606061	0.109090909	0.177777778	0.711111111	0.682828283	1	0.109090909	0.533333333
571	576	YCR031C	chrIII	-	TATA-less	TAF1-enriched	11749	NA	178261	NA	YCR031C	1144	NULL	0.118361567	0.006240605	0.041979528	0.301326595	0.006240605	0.042651237	0.036325106	0.042651237
572	577	orphan	chrIII	-	TATA-less	TAF1-depleted	2813	NA	178703	NA	orphan	0.4	NULL	0.479500122	0.411313792	NA	NaN	NA	NaN	NA	NA
573	578	CUT048	chrIII	+	TATA-less	TAF1-enriched	86	179188	179059	-129	CUT048	88.3	NULL	0.932206034	0.172722365	0.359305232	0.895810367	0.349393711	0.088675943	0.074024444	0.238557044
574	579	orphan	chrIII	-	TATA-less	TAF1-enriched	120	185994	186007	-13	orphan	0	NA	NA	NA	NA	NA	NA	NA	NA	NA
575	580	YCR033W	chrIII	+	TATA-less	TAF1-enriched	639	186324	186267	-57	YCR033W	0	NA	NA	NA	NA	NA	NA	NA	NA	NA
576	581	YCR034W	chrIII	+	TATA-less	TAF1-enriched	51488	190606	190566	-40	YCR034W	0	NA	NA	NA	NA	NA	NA	NA	NA	NA
577	582	YCR035C	chrIII	-	TATA-less	TAF1-enriched	344	193010	193036	-26	YCR035C	0.9	NULL	NaN	0.196705602	0.248213079	0.248213079	0.270289385	0.414216178	0.504985075	0.10658317
578	583	YCR036W	chrIII	+	TATA-less	TAF1-enriched	230	193331	193257	-74	YCR036W	29.2	NULL	0.094316816	0.007366379	1	0.401735637	0.018716589	1	0.791651777	0.576150122
579	584	YCR037C	chrIII	-	TATA-less	TAF1-enriched	79	197039	197174	-135	YCR037C	0	NA	NA	NA	NA	NA	NA	NA	NA	NA
580	585	orphan	chrIII	+	TATA-less	TAF1-enriched	18	197655	197646	-9	orphan	0	NA	NA	NA	NA	NA	NA	NA	NA	NA
581	586	ST0323	chrIII	+	TATA-less	TAF1-enriched	306	202768	202731	-37	ST0323	0.3	NULL	NA	NaN	NA	NA	NaN	NA	NA	NA
582	587	YCR042C	chrIII	-	TATA-less	TAF1-enriched	188	205388	205420	-32	YCR042C	211	NULL	0.007800146	0.007800146	0.790241066	0.046730149	0.070479927	0.046730149	0.374030622	0.507386527
583	588	YCR043C	chrIII	-	TATA-less	TAF1-enriched	283	206625	206675	-50	YCR043C	43.3	NULL	0.551517708	0.074024444	0.088675943	0.359305232	0.551517708	0.694417686	0.033441628	0.088675943
584	589	YCR044C	chrIII	-	TATA-less	TAF1-enriched	797	207927	207960	-33	YCR044C	27.2	NULL	0.609758799	0.682828283	1	0.711111111	0.682828283	0.044444444	0.56969697	0.533333333
585	590	YCR045C	chrIII	-	TATA-less	TAF1-enriched	5	209914	209986	-72	YCR045C	0.2	NULL	NA	0.4	NA	1	NA	NA	NA	NA
586	591	YCR046C	chrIII	-	TATA-less	TAF1-enriched	9690	210397	210429	-32	YCR046C	0	NA	NA	NA	NA	NA	NA	NA	NA	NA
587	592	YCR047C	chrIII	-	TATA-less	TAF1-enriched	91	211581	211634	-53	YCR047C	0	NA	NA	NA	NA	NA	NA	NA	NA	NA
588	593	YCR048W	chrIII	+	TATA-less	TAF1-enriched	641	211902	211882	-20	YCR048W	15.6	NULL	0.109090909	0.933333333	0.222222222	0.044444444	0.153535354	0.533333333	0.460606061	0.600401848
589	594	YCR051W	chrIII	+	TATA-less	TAF1-enriched	1691	214099	214062	-37	YCR051W	720.4	NULL	0.603988754	0.025386719	0.353367292	0.14094646	0.102955624	0.06260547	0.057197149	0.690816272
590	595	YCR052W	chrIII	+	TATA-less	TAF1-enriched	4748	215014	214961	-53	YCR052W	15	NULL	0.798561763	0.798561763	0.694417686	0.694417686	0.798561763	0.694417686	0.551517708	0.694417686
591	596	YCR053W	chrIII	+	TATA-less	TAF1-enriched	17163	216690	216622	-68	YCR053W	510.5	NULL	0.682828283	0.072727273	0.190345809	0.177777778	0.808080808	0.533333333	0.153535354	0.177777778
592	597	YCR054C	chrIII	-	TATA-less	TAF1-enriched	643	220022	220171	-149	YCR054C	9.3	NULL	0.56969697	0.56969697	0.533333333	0.177777778	0.282828283	0.4	0.933333333	0.533333333
593	598	YCR057C	chrIII	-	TATA-less	TAF1-enriched	3767	223225	223284	-59	YCR057C	276.6	NULL	0.103570182	0.338129828	0.14472819	0.06260547	0.103570182	0.790241066	0.143836769	0.110492024
594	599	ST0331	chrIII	+	TATA-less	TAF1-enriched	73	223542	223511	-31	ST0331	0.7	NULL	1	0.805732791	1	NA	1	1	1	1
595	600	YCR060W	chrIII	+	TATA-containing	TAF1-enriched	286	224448	224399	-49	YCR060W	3.4	NULL	0.849428909	0.164248061	0.656500728	1	0.728454189	0.554867954	0.444469088	0.187781272
596	601	YCR061W	chrIII	+	TATA-less	TAF1-enriched	190	225560	225493	-67	YCR061W	0.6	NULL	0.666666667	0.767096868	NA	0.666666667	0.666666667	0.666666667	0.10658317	NA
597	602	tS(CGA)C	chrIII	+	TATA-less	-	413	NA	227932	NA	tS(CGA)C	3.2	NULL	0.766230334	0.774812202	0.179712495	0.654720846	0.774812202	0.881642405	0.807902934	0.456611839
598	603	YCR063W	chrIII	+	TATA-less	TAF1-enriched	2262	228346	228295	-51	YCR063W	2.9	NULL	0.817520603	1	1	0.540817904	0.846622625	0.456611839	0.921056394	0.456611839
599	604	YCR064C	chrIII	-	TATA-less	TAF1-enriched	31	228494	228505	-11	YCR064C	192.5	NULL	0.200353348	0.19875925	0.693529129	0.59928633	0.394107149	0.065915952	0.125042727	0.686130413
600	605	YCR065W	chrIII	+	TATA-less	TAF1-depleted	575	229297	229129	-168	YCR065W	1780.5	NULL	0.668938973	0.931726391	1	1	1	1	1	1
601	606	YCR066W	chrIII	+	TATA-less	TAF1-enriched	658	231506	231454	-52	YCR066W	9.7	NULL	0.797516299	0.145986278	0.508708087	1	0.729506525	1	0.441484761	0.234230702
602	607	YCR067C	chrIII	-	TATA-containing	TAF1-enriched	5499	236380	236441	-61	YCR067C	1	NULL	0.72367361	0.538472381	NA	0.235679913	0.563702862	1	1	0.72367361
603	608	YCR068W	chrIII	+	TATA-less	TAF1-enriched	136	237108	237075	-33	YCR068W	24.9	NULL	0.682828283	0.048484848	0.533333333	0.4	0.933333333	0.266666667	0.56969697	0.600401848
604	609	CUT467	chrIII	-	TATA-less	TAF1-enriched	99	238459	238646	-187	CUT467	11.4	NULL	0.394938074	0.493101793	0.533333333	0.533333333	0.173477636	0.533333333	0.282828283	0.888888889
605	610	YCR069W	chrIII	+	TATA-less	TAF1-enriched	5147	238962	238931	-31	YCR069W	6.1	NULL	0.808080808	0.933333333	0.06674615	0.049491231	0.214141414	0.711111111	0.214141414	1
606	611	YCR071C	chrIII	-	TATA-less	TAF1-enriched	261	240541	240582	-41	YCR071C	12.8	NULL	0.808080808	0.460606061	0.177777778	0.177777778	0.460606061	0.4	1	0.4
607	612	YCR072C	chrIII	-	TATA-containing	TAF1-enriched	1642	242337	242379	-42	YCR072C	38.2	NULL	0.808080808	0.682828283	0.888888889	0.4	0.367676768	0.190345809	0.864900617	0.533333333
608	613	ST0339	chrIII	+	TATA-less	TAF1-enriched	397	242625	242592	-33	ST0339	2	NULL	0.895652088	0.479500122	0.110011643	0.21386842	0.322198806	0.21386842	0.079615801	0.110011643
609	614	YCR073C	chrIII	-	TATA-less	TAF1-enriched	21	246591	246639	-48	YCR073C	1.1	NULL	0.854445068	0.079594089	1	0.805732791	0.854445068	0.805732791	0.805732791	0.692632784
610	615	YCR073W-A	chrIII	+	TATA-less	TAF1-enriched	1313	246992	246950	-42	YCR073W-A	16.2	NULL	0.56969697	0.282828283	0.294801992	0.4	0.932206034	0.4	0.460606061	1
611	616	YCR075C	chrIII	-	TATA-less	TAF1-depleted	73	248787	248813	-26	YCR075C	0	NA	NA	NA	NA	NA	NA	NA	NA	NA
612	617	orphan	chrIII	-	TATA-containing	TAF1-enriched	104	250002	250039	-37	orphan	0.2	NULL	NA	NA	NA	NA	NA	NA	NA	NA
613	618	YCR077C	chrIII	-	TATA-less	TAF1-enriched	414	252606	252645	-39	YCR077C	240	NULL	0.682828283	0.56969697	1	0.711111111	0.048484848	0.177777778	0.367676768	0.266666667
614	619	YCR079W	chrIII	+	TATA-less	TAF1-enriched	166	252879	252813	-66	YCR079W	0	NA	NA	NA	NA	NA	NA	NA	NA	NA
615	620	YCR081W	chrIII	+	TATA-less	TAF1-enriched	3515	254418	254357	-61	YCR081W	13.2	NULL	0.798561763	0.148125677	1	0.238557044	0.106024499	0.088675943	0.08830911	0.088675943
616	621	YCR082W	chrIII	+	TATA-less	TAF1-enriched	6732	258885	258853	-32	YCR082W	6.1	NULL	0.864900617	0.367676768	0.294801992	0.533333333	0.367676768	0.533333333	0.933333333	0.711111111
617	622	YCR083W	chrIII	+	TATA-less	TAF1-enriched	659	259590	259543	-47	YCR083W	2.6	NULL	0.155478268	0.004952607	0.629879079	0.055859225	0.010471171	0.027362545	0.034457727	0.421881247
618	623	YCR084C	chrIII	-	TATA-less	TAF1-enriched	27585	262597	262677	-80	YCR084C	4184.6	NULL	0.00503917	0.183229817	1	0.177015983	0.005576156	0.177015983	0.327223219	0.034132951
619	624	YCR086W	chrIII	+	TATA-less	TAF1-enriched	85	263401	263314	-87	YCR086W	17.3	NULL	0.414594196	0.046784411	1	0.676082741	0.173916672	1	0.331829403	0.401735637
620	625	YCR087C-A	chrIII	-	TATA-less	TAF1-enriched	465	264443	264493	-50	YCR087C-A	0.2	NULL	NA	0.683091398	NaN	0.479500122	NaN	NaN	NaN	0.479500122
621	626	YCR088W	chrIII	+	TATA-less	TAF1-enriched	3283	265086	265029	-57	YCR088W	3.3	NULL	0.516853194	1	0.614962142	0.866844726	0.516853194	0.207196298	0.866844726	0.614962142
622	627	YCR089W	chrIII	+	TATA-less	TAF1-depleted	45	267157	267136	-21	YCR089W	528.2	NULL	0.043622116	0.019153411	0.135857322	0.329609605	0.091838902	0.04332537	0.931112271	0.079919784
623	628	YCR090C	chrIII	-	TATA-less	TAF1-enriched	78	272837	272878	-41	YCR090C	0.4	NULL	1	0.345778586	1	1	NA	NA	0.479500122	NA
624	629	YCR092C	chrIII	-	TATA-less	TAF1-enriched	25	279828	279849	-21	YCR092C	1151.4	NULL	1	0.006143194	0.035410671	0.035410671	0.467448917	0.035410671	0.311071854	0.03605437
625	630	YCR093W	chrIII	+	TATA-less	TAF1-enriched	614	280129	280087	-42	YCR093W	18.4	NULL	1	0.106024499	0.888888889	0.294801992	0.682828283	0.888888889	1	0.793389781
626	631	YCR094W	chrIII	+	TATA-less	TAF1-enriched	2999	286748	286699	-49	YCR094W	1.4	NULL	0.840730447	0.759981527	NA	NA	1	0.285376881	0.285376881	0.328564983
627	632	YCR095C	chrIII	-	TATA-less	TAF1-enriched	118	289247	289296	-49	YCR095C	2.2	NULL	0.21976848	0.148634711	0.339727776	0.436385231	0.339727776	0.231900487	0.671373241	1
628	633	YCR095W-A	chrIII	+	TATA-less	TAF1-enriched	20	289522	289501	-21	YCR095W-A	70.6	NULL	0.214141414	0.496151813	0.177777778	0.888888889	0.56969697	1	0.682828283	0.793389781
629	634	YCR097W	chrIII	+	TATA-less	TAF1-enriched	204	293856	293832	-24	YCR097W	62	NULL	0.367676768	0.173477636	0.711111111	0.4	0.670582894	0.044444444	0.56969697	1
630	635	orphan	chrIII	-	TATA-less	TAF1-enriched	173	299053	299017	36	orphan	0.2	NULL	NA	0.332921608	NA	NaN	NA	NaN	NaN	NaN
631	636	YCR106W	chrIII	+	TATA-less	TAF1-enriched	44	310968	310944	-24	YCR106W	0.8	NULL	0.220671362	0.460633523	0.666666667	0.666666667	0.666666667	NA	NA	0.666666667
632	637	orphan	chrIV	-	TATA-less	TAF1-enriched	105	20037	20129	-92	orphan	79.3	NULL	0.025914063	0.04838244	0.228361945	1	0.049185351	0.787615767	0.797516299	1
633	638	YDL241W	chrIV	+	TATA-less	TAF1-enriched	137	20194	20178	-16	YDL241W	33.8	NULL	0.168923242	0.221953283	0.046730149	0.507386527	0.032207629	0.06260547	0.66269405	0.28733307
634	639	orphan	chrIV	-	TATA-containing	TAF1-enriched	0	20380	20483	-103	orphan	0.8	NULL	0.37109337	0.078982579	0.07363827	NA	NaN	NaN	NaN	NaN
635	640	CUT468	chrIV	-	TATA-less	TAF1-enriched	4	22413	22436	-23	CUT468	109.2	NULL	0.048783581	0.145986278	0.59928633	0.894523556	0.267926383	0.694417686	0.794646803	0.238557044
636	641	YDL240W	chrIV	+	TATA-less	TAF1-enriched	1904	22680	22651	-29	YDL240W	42.9	NULL	0.394107149	0.028282828	0.600401848	0.177777778	0.496151813	0.266666667	0.864900617	0.711111111
637	642	YDL236W	chrIV	+	TATA-less	TAF1-enriched	1504	32311	32259	-52	YDL236W	1042.6	NULL	0.146148201	0.289756002	0.327935987	0.768624792	0.106168224	0.768624792	0.220150713	0.125525756
638	643	YDL235C	chrIV	-	TATA-less	TAF1-depleted	347	33998	34025	-27	YDL235C	1871.9	NULL	0.173058229	0.004866885	1	0.02677094	0.004782003	0.02677094	0.004532406	0.026183688
639	644	orphan	chrIV	+	TATA-less	TAF1-enriched	8	NA	34315	NA	orphan	1.9	NULL	0.099213149	0.301500273	0.486600914	0.547615022	0.302503998	0.617075077	0.302810456	0.148961124
640	645	YDL232W	chrIV	+	TATA-less	TAF1-enriched	3046	38504	38458	-46	YDL232W	9101.6	NULL	0.005576156	0.00503917	0.033499083	0.413176151	0.005855932	1	0.214542019	0.033499083
641	646	YDL231C	chrIV	-	TATA-less	TAF1-enriched	331	42315	42349	-34	YDL231C	197.8	NULL	0.185728553	0.005855932	0.887685742	0.419740503	0.788521794	0.139793337	0.045789833	0.139793337
642	647	YDL230W	chrIV	+	TATA-less	TAF1-enriched	286	42704	42670	-34	YDL230W	930.4	NULL	0.931726391	0.670037641	0.293325574	0.232774339	0.439858381	0.232774339	0.232842047	0.693529129
643	648	YDL229W	chrIV	+	TATA-containing	TAF1-depleted	11366	44056	44035	-21	YDL229W	37073	NULL	0.001313653	0.049238968	NaN	0.004915802	NaN	0.005188608	0.001556573	NaN
644	649	YDL227C	chrIV	-	TATA-less	TAF1-enriched	390	47967	48070	-103	YDL227C	157.8	NULL	0.012652434	0.547269697	0.510019168	0.235679913	0.667270232	0.68989587	0.607863471	1
645	650	orphan	chrIV	+	TATA-less	TAF1-enriched	48	49907	49902	-5	orphan	74.6	NULL	0.013460069	0.026711985	0.895810367	0.048798093	1	0.792771379	0.607225552	0.088675943
646	651	orphan	chrIV	+	TATA-containing	TAF1-enriched	59	50595	50512	-83	orphan	41.3	NULL	0.443898466	0.346843113	1	0.895810367	0.551517708	0.508708087	0.443898466	0.14972246
647	652	YDL226C	chrIV	-	TATA-less	TAF1-enriched	7087	52162	52200	-38	YDL226C	2165.3	NULL	0.001313653	0.001688186	0.005188608	NaN	0.001643552	0.080118314	0.01012654	0.005188608
648	653	YDL225W	chrIV	+	TATA-less	TAF1-enriched	2767	52442	52396	-46	YDL225W	461.4	NULL	0.013460069	0.173058229	0.14472819	0.083811901	1	0.1484791	0.1627659	1
649	654	YDL224C	chrIV	-	TATA-less	TAF1-enriched	277	56665	56710	-45	YDL224C	215.4	NULL	0.389902098	0.548699	0.353367292	0.893187858	0.190673275	0.790241066	0.485230567	0.893187858
650	655	YDL219W	chrIV	+	TATA-less	TAF1-enriched	386	65277	65211	-66	YDL219W	1045.3	NULL	0.128902119	0.003261123	0.015494295	0.015975041	0.002685983	0.802587349	0.823063274	0.136037128
651	656	CUT470	chrIV	-	TATA-less	TAF1-enriched	1	65912	65946	-34	CUT470	88.6	NULL	0.72903449	0.704233909	0.279641534	1	0.093697659	0.079919784	0.635869658	0.138408493
652	657	YDL217C	chrIV	-	TATA-less	TAF1-enriched	115	68715	68770	-55	YDL217C	236.6	NULL	0.030987496	0.019816095	0.077974734	0.06013513	0.014036221	0.044680647	0.109574681	0.077974734
653	658	orphan	chrIV	-	TATA-less	TAF1-enriched	166	70279	70298	-19	orphan	149.5	NULL	0.797164177	0.145270893	0.110492024	0.68989587	0.081022014	0.232774339	0.168923242	0.110492024
654	659	orphan	chrIV	-	TATA-less	TAF1-enriched	228	73298	73360	-62	orphan	556.9	NULL	1	0.521551992	0.046044853	0.68122512	0.006740038	0.68122512	0.325355348	0.587593848
655	660	CUT050	chrIV	+	TATA-less	TAF1-enriched	21	73625	73601	-24	CUT050	51.9	NULL	0.105411524	0.040120865	0.1484791	0.895493084	0.013296732	0.511319908	1	0.690816272
656	661	YDL215C	chrIV	-	TATA-less	TAF1-enriched	168	73932	74100	-168	YDL215C	745	NULL	0.060816949	0.050394337	0.293325574	0.049491231	0.931847255	0.088675943	0.668938973	1
657	662	orphan	chrIV	+	TATA-less	TAF1-enriched	21	74428	74423	-5	orphan	7.4	NULL	0.798215076	0.440673311	0.693529129	0.357835467	0.550114935	0.693529129	0.105411524	0.087703529
658	663	YDL213C	chrIV	-	TATA-less	TAF1-enriched	228	77936	77985	-49	YDL213C	2113.2	NULL	0.005950856	0.005393812	0.283876475	0.665005542	0.04128299	0.665005542	0.005393812	0.283876475
659	664	YDL212W	chrIV	+	TATA-containing	TAF1-enriched	682	78435	78387	-48	YDL212W	4287.2	NULL	1	0.010355673	0.080118314	NaN	0.001313653	0.004915802	0.215924939	NaN
660	665	ST0370	chrIV	+	TATA-less	TAF1-enriched	85	80738	80708	-30	ST0370	51.3	NULL	0.460606061	0.798561763	0.177777778	0.4	0.933333333	0.294801992	0.201147528	0.711111111
661	666	tG(GCC)D1	chrIV	-	TATA-less	-	0	83390	83470	-80	tG(GCC)D1	0	NA	NA	NA	NA	NA	NA	NA	NA	NA
662	667	YDL209C	chrIV	-	TATA-less	TAF1-enriched	59	87216	87248	-32	YDL209C	437.4	NULL	0.595883091	0.003261123	0.802587349	0.348501424	0.595883091	0.023868442	0.263552477	0.136037128
663	668	YDL208W	chrIV	+	TATA-less	TAF1-enriched	2408	87535	87467	-68	YDL208W	5336	NULL	0.660928738	0.928478896	0.889986861	0.295641821	0.280491716	0.039979603	0.015775183	0.040643643
664	669	YDL207W	chrIV	+	TATA-less	TAF1-enriched	821	88279	88243	-36	YDL207W	230.8	NULL	0.394107149	0.932206034	1	0.895810367	0.733196121	0.895810367	0.798561763	0.694417686
665	670	YDL205C	chrIV	-	TATA-containing	TAF1-enriched	426	93888	93929	-41	YDL205C	2068.6	NULL	0.097408871	0.478273056	0.49356279	0.657788651	0.322525783	0.657788651	1	0.684195574
666	671	YDL204W	chrIV	+	TATA-less	TAF1-enriched	283	94358	94205	-153	YDL204W	210.9	NULL	0.007154342	0.466556211	0.042651237	0.779106125	0.537638448	0.124220661	0.036325106	0.042651237
667	672	YDL203C	chrIV	-	TATA-less	TAF1-enriched	44	97924	98091	-167	YDL203C	310.4	NULL	0.057197149	0.007800146	1	0.080892654	0.221953283	0.503357576	0.595883091	0.892152103
668	673	YDL202W	chrIV	+	TATA-less	TAF1-enriched	293	98476	98422	-54	YDL202W	304.9	NULL	0.199557256	0.193119366	0.048106828	0.347268461	0.008133895	0.356355957	0.930481276	0.047417494
669	674	CUT472	chrIV	-	TATA-less	TAF1-enriched	27	99252	99330	-78	CUT472	20.2	NULL	0.214141414	0.153535354	0.533333333	0.895493084	0.609758799	0.116073943	0.153535354	0.085758003
670	675	YDL201W	chrIV	+	TATA-less	TAF1-enriched	1450	99551	99518	-33	YDL201W	756.1	NULL	0.128902119	0.004866885	0.027362545	0.421881247	0.004866885	0.421881247	0.311071854	0.576150122
671	676	YDL198C	chrIV	-	TATA-less	TAF1-depleted	1292	104464	104585	-121	YDL198C	576.7	NULL	0.008360374	0.032207629	0.049491231	0.049491231	0.008246738	0.694417686	0.050394337	0.049491231
672	677	YDL196W	chrIV	+	TATA-less	TAF1-enriched	176	106814	106739	-75	YDL196W	25.6	NULL	0.106024499	0.232842047	0.694417686	0.895810367	0.495394415	0.238557044	0.864665265	0.694417686
673	678	YDL197C	chrIV	-	TATA-less	TAF1-enriched	79	106814	106846	-32	YDL197C	327	NULL	0.004952607	0.029053086	0.027362545	0.332921608	0.004952607	0.027362545	0.046265852	0.052107267
674	679	YDL194W	chrIV	+	TATA-less	TAF1-enriched	201	111410	111372	-38	YDL194W	182.6	NULL	0.929568022	0.103570182	0.484695003	0.133293185	0.296517172	0.046730149	0.390749904	0.484695003
675	680	YDL193W	chrIV	+	TATA-less	TAF1-depleted	1539	114783	114599	-184	YDL193W	1540.4	NULL	0.044408231	0.007581651	0.142210424	0.587593848	0.044408231	0.045361665	0.541414544	0.142210424
676	681	CUT473	chrIV	-	TATA-less	TAF1-enriched	47	NA	115954	NA	CUT473	54.8	NULL	0.026445101	0.101109741	0.356355957	0.598161453	0.440673311	0.048798093	0.191490579	0.232774339
677	682	YDL192W	chrIV	+	TATA-less	TAF1-enriched	292	116300	116238	-62	YDL192W	31046.8	NULL	0.007366379	0.007800146	0.061780727	0.046044853	0.012022825	0.045361665	0.41827846	0.045361665
678	683	YDL191W	chrIV	+	TATA-less	TAF1-enriched	3999	117682	117611	-71	YDL191W	6741.1	NULL	0.006842389	0.006842389	0.193930852	0.776814004	0.065817128	1	0.581969642	0.780595556
679	684	orphan	chrIV	-	TATA-less	TAF1-enriched	0	117682	117761	-79	orphan	0.1	NULL	1	NaN	NaN	NaN	NaN	NA	NA	NaN
680	685	YDL190C	chrIV	-	TATA-less	TAF1-enriched	3958	121741	121785	-44	YDL190C	1521.5	NULL	0.001556573	0.001688186	0.005188608	NaN	0.001688186	NaN	0.215924939	0.005188608
681	686	YDL189W	chrIV	+	TATA-less	TAF1-enriched	378	122021	121996	-25	YDL189W	354	NULL	0.02741654	0.344263657	0.688030163	0.792147392	0.193119366	0.231310785	0.732743159	0.147232255
682	687	YDL188C	chrIV	-	TATA-less	TAF1-enriched	1296	125119	125180	-61	YDL188C	357.5	NULL	0.040828988	0.017219911	0.238557044	0.238557044	0.010434401	0.188991722	0.797164177	0.510019168
683	688	orphan	chrIV	-	TATA-less	TAF1-enriched	472	126403	126473	-70	orphan	268.5	NULL	0.178179395	0.117689548	0.219338776	1	0.775867448	0.223883771	0.524902502	0.344156576
684	689	YDL185W	chrIV	+	TATA-less	TAF1-enriched	4644	126753	126686	-67	YDL185W	36352.9	NULL	0.001556573	0.001733589	0.080118314	NaN	0.049238968	NaN	0.050186187	NaN
685	690	YDL184C	chrIV	-	TATA-less	TAF1-enriched	578296	130465	130506	-41	YDL184C	134402.4	NULL	0.006842389	0.125786425	0.076031041	0.671784971	0.005950856	0.295641821	0.125786425	0.494997202
686	691	orphan	chrIV	+	TATA-less	TAF1-enriched	6	132179	132159	-20	orphan	30.2	NULL	0.609758799	0.166625576	0.266666667	0.711111111	0.933333333	1	0.808080808	0.711111111
687	692	CUT474	chrIV	-	TATA-less	TAF1-enriched	87	132519	132673	-154	CUT474	52.3	NULL	0.007800146	0.165086234	0.68989587	0.083811901	0.931604881	0.046044853	0.437392462	0.894194334
688	693	YDL182W	chrIV	+	TATA-containing	TAF1-depleted	13775	133412	133405	-7	YDL182W	1553.3	NULL	0.233910901	0.502730957	0.035410671	1	0.005855932	1	0.218758005	0.03605437
689	694	CUT475	chrIV	-	TATA-less	TAF1-enriched	49	134696	134743	-47	CUT475	114.7	NULL	0.551517708	0.232842047	0.694417686	0.14972246	0.670582894	0.14972246	0.492330692	0.048798093
690	695	YDL181W	chrIV	+	TATA-less	TAF1-depleted	1533	135208	135114	-94	YDL181W	1392.4	NULL	0.144554389	0.197959327	0.046730149	0.28733307	0.007910597	0.046044853	0.038364038	0.046730149
691	696	YDL180W	chrIV	+	TATA-less	TAF1-depleted	619	NA	135764	NA	YDL180W	53.7	NULL	0.367676768	0.214141414	0.711111111	0.044444444	0.230364065	0.177777778	0.808080808	0.432023291
692	697	YDL179W	chrIV	+	TATA-less	TAF1-depleted	256	138289	138196	-93	YDL179W	493.4	NULL	1	0.007049543	0.041310308	0.326250455	0.007154342	0.041979528	0.505554817	0.041979528
693	698	CUT476	chrIV	-	TATA-less	TAF1-enriched	23	139138	139257	-119	CUT476	105.7	NULL	0.020487551	0.33901613	0.06260547	0.06260547	1	0.080892654	0.862982628	0.892152103
694	699	YDL178W	chrIV	+	TATA-less	TAF1-enriched	561	139531	139500	-31	YDL178W	593.3	NULL	0.054988348	0.147320903	0.301326595	0.03871668	0.072600939	0.746885633	0.41772157	0.301326595
695	700	YDL177C	chrIV	-	TATA-less	TAF1-depleted	65	141542	141706	-164	YDL177C	169.3	NULL	0.117016849	0.390749904	0.111611768	0.184897599	0.038364038	0.184897599	0.796810213	0.418961725
696	701	YDL176W	chrIV	+	TATA-less	TAF1-enriched	318	142003	141960	-43	YDL176W	90.9	NULL	0.731830274	0.383869819	0.145981945	0.111611768	0.230364065	0.047417494	0.193930852	0.787615767
697	702	YDL175C	chrIV	-	TATA-less	TAF1-depleted	3398	145510	145545	-35	YDL175C	103.4	NULL	1	0.007800146	0.232774339	0.208468351	0.66269405	0.228361945	1	0.417455426
698	703	YDL174C	chrIV	-	TATA-containing	TAF1-enriched	1281	147520	147617	-97	YDL174C	381.9	NULL	0.931726391	0.201147528	0.690816272	0.357835467	0.729506525	0.4291953	0.796810213	0.048798093
699	704	YDL173W	chrIV	+	TATA-less	TAF1-enriched	1380	148209	148172	-37	YDL173W	428	NULL	0.086067568	0.031291196	0.228361945	0.143471009	1	0.2811981	0.2645353	0.14472819
700	705	YDL172C	chrIV	-	TATA-less	TAF1-enriched	37	149373	149422	-49	YDL172C	54.9	NULL	0.153535354	0.496151813	1	0.044444444	0.496151813	0.044444444	1	0.4
701	706	YDL171C	chrIV	-	TATA-less	TAF1-enriched	4289	155849	155916	-67	YDL171C	439.9	NULL	0.007690497	0.007800146	0.68989587	0.046044853	0.666143638	0.045361665	0.793165548	0.132006336
702	707	YDL170W	chrIV	+	TATA-less	TAF1-enriched	31	156360	156318	-42	YDL170W	449	NULL	0.094316816	0.005393812	0.141326003	0.421881247	0.01843028	1	0.013426387	0.141326003
703	708	YDL168W	chrIV	+	TATA-less	TAF1-depleted	408	159568	159548	-20	YDL168W	687	NULL	0.005855932	0.027125386	0.03605437	0.06635304	0.006240605	1	0.503677558	0.03605437
704	709	YDL167C	chrIV	-	TATA-less	TAF1-enriched	264	163155	163197	-42	YDL167C	674.8	NULL	0.006143194	0.177330783	0.326250455	0.112351198	0.466556211	0.112351198	0.848145301	1
705	710	CUT051	chrIV	+	TATA-containing	TAF1-enriched	66	163445	163378	-67	CUT051	43.9	NULL	0.19875925	0.04838244	0.690816272	0.424874689	0.424565545	0.14472819	0.666708361	0.682224553
706	711	YDL166C	chrIV	-	TATA-containing	TAF1-enriched	585	164035	164098	-63	YDL166C	783.9	NULL	0.854696042	0.423679582	0.386476231	0.671784971	0.854987211	0.670683572	0.64707823	0.177015983
707	712	YDL164C	chrIV	-	TATA-less	TAF1-enriched	2482	NA	167254	NA	YDL164C	68.2	NULL	0.808080808	0.033441628	0.294801992	0.294801992	0.061271395	1	0.282828283	0.088888889
708	713	YDL161W	chrIV	+	TATA-less	TAF1-enriched	59	167743	167714	-29	YDL161W	585	NULL	0.006326683	0.165243866	0.027362545	0.576150122	0.004866885	0.872382973	0.360765351	0.027362545
709	714	YDL160C-A	chrIV	-	TATA-less	TAF1-enriched	250	169582	169628	-46	YDL160C-A	299.6	NULL	1	0.789711992	0.125525756	0.657788651	0.033359567	0.657788651	0.410840757	0.125525756
710	715	YDL160C	chrIV	-	TATA-less	TAF1-enriched	6517	172168	172214	-46	YDL160C	4478.5	NULL	0.001733589	0.001643552	0.005188608	NaN	0.01012654	NaN	NaN	0.080118314
711	716	YDL159W	chrIV	+	TATA-less	TAF1-enriched	133	172474	172435	-39	YDL159W	639.3	NULL	0.007690497	0.008021847	0.135857322	0.351857931	0.012178835	0.147232255	0.008133895	0.28581287
712	717	YDL157C	chrIV	-	TATA-less	TAF1-enriched	2129	174578	174623	-45	YDL157C	1503.6	NULL	0.341654836	0.33901613	0.064258531	0.231310785	0.016801723	0.135857322	0.101725395	0.047417494
713	718	YDL156W	chrIV	+	TATA-less	TAF1-enriched	11	174872	174824	-48	YDL156W	152.9	NULL	0.047582097	0.007910597	1	0.047417494	0.013134295	0.047417494	0.007910597	0.143471009
714	719	YDL155W	chrIV	+	TATA-less	TAF1-enriched	96	176679	176643	-36	YDL155W	154.1	NULL	1	0.340778614	0.685167447	0.344156576	0.048783581	0.344156576	1	0.889235607
715	720	orphan	chrIV	-	TATA-less	TAF1-enriched	7	179634	179814	-180	orphan	1.9	NULL	1	0.183150203	0.411313792	0.411313792	0.411313792	0.27650048	0.87778228	NA
716	721	orphan	chrIV	+	TATA-less	TAF1-enriched	93	180094	180006	-88	orphan	358.9	NULL	0.008246738	0.231192354	0.048798093	0.087703529	0.008133895	0.048798093	0.215924939	0.895493084
717	722	YDL153C	chrIV	-	TATA-containing	TAF1-enriched	103	183015	183044	-29	YDL153C	361.5	NULL	0.004866885	0.004952607	0.027362545	1	1	1	0.927628061	0.178744044
718	723	YDL150W	chrIV	+	TATA-less	TAF1-enriched	113	183291	183247	-44	YDL150W	936.9	NULL	0.115795437	0.006143194	1	0.421881247	0.046742883	0.125525756	0.173058229	0.036701192
719	724	YDL148C	chrIV	-	TATA-less	TAF1-enriched	104	190594	190637	-43	YDL148C	1307.6	NULL	0.014396268	0.007366379	0.04332537	0.04332537	0.194740405	0.044001861	0.113643439	0.044001861
720	725	YDL147W	chrIV	+	TATA-less	TAF1-enriched	1477	190920	190878	-42	YDL147W	3708.4	NULL	0.143836769	0.007049543	1	0.510019168	0.389902098	0.789593876	0.085507023	0.684195574
721	726	YDL146W	chrIV	+	TATA-less	TAF1-enriched	710	192917	192594	-323	YDL146W	602.6	NULL	0.165086234	0.157299207	0.041979528	0.480085003	0.007154342	0.219338776	0.190673275	0.042651237
722	727	YDL145C	chrIV	-	TATA-less	TAF1-enriched	2129	198411	198438	-27	YDL145C	1786.8	NULL	0.129595844	0.001556573	0.004915802	NaN	0.129595844	0.080118314	0.049238968	0.004915802
723	728	YDL144C	chrIV	-	TATA-less	TAF1-enriched	395	199715	199749	-34	YDL144C	528.8	NULL	1	0.007366379	0.35033841	0.893187858	0.341654836	0.103741678	0.289756002	0.132006336
724	729	YDL143W	chrIV	+	TATA-less	TAF1-enriched	2745	200011	199961	-50	YDL143W	1999.7	NULL	0.005855932	0.00951715	0.035410671	0.112351198	0.00604661	0.112351198	0.029758067	0.035410671
725	730	YDL141W	chrIV	+	TATA-less	TAF1-enriched	163	202840	202801	-39	YDL141W	275.5	NULL	0.798215076	0.030987496	0.690816272	0.048798093	0.073010712	0.113846298	1	1
726	731	orphan	chrIV	-	TATA-less	TAF1-enriched	3044	NA	211104	NA	orphan	237	NULL	0.460606061	0.008360374	0.294801992	0.693529129	0.609758799	0.888888889	0.798561763	0.533333333
727	732	YDL139C	chrIV	-	TATA-less	TAF1-enriched	480	212017	212084	-67	YDL139C	213	NULL	0.004040404	0.007366379	0.049491231	1	0.443097314	0.294801992	0.932087071	0.294801992
728	733	YDL138W	chrIV	+	TATA-less	TAF1-depleted	583	213262	213172	-90	YDL138W	159.5	NULL	0.549408625	0.070479927	0.426325543	0.145981945	0.731370313	0.234230702	0.144554389	0.892500695
729	734	CUT479	chrIV	-	TATA-containing	TAF1-enriched	226	215550	215711	-161	CUT479	1227.1	NULL	0.666143638	0.007473611	0.585130627	0.68989587	0.545826818	0.501992689	0.489211129	1
730	736	orphan	chrIV	+	TATA-less	TAF1-enriched	3378	216070	216051	-19	orphan	5419.8	NULL	0.003261123	0.003193895	0.015975041	0.348501424	0.003193895	0.015975041	0.91124672	0.015494295
731	737	ANT109	chrIV	-	TATA-less	TAF1-depleted	135	216994	217171	-177	ANT109	24.5	NULL	0.268767553	1	0.694417686	1	0.345986525	0.895810367	0.232842047	0.894523556
732	738	YDL136W	chrIV	+	TATA-less	TAF1-enriched	8604	NA	217567	NA	YDL136W	17267.6	NULL	0.007690497	0.031595791	0.045361665	0.68989587	0.007690497	0.501992689	0.929165456	0.347268461
733	740	YDL135C	chrIV	-	TATA-less	TAF1-enriched	1684	219325	219333	-8	YDL135C	1233.9	NULL	0.021396137	0.007910597	0.694417686	0.686130413	0.306482234	0.049491231	0.059003394	0.048798093
734	741	orphan	chrIV	+	TATA-less	TAF1-depleted	7	221371	221294	-77	orphan	4.6	NULL	0.375757576	0.367676768	0.4	1	0.496151813	0.177777778	0.193939394	0.888888889
735	742	YDL133C-A	chrIV	-	TATA-containing	TAF1-enriched	666155	221750	221819	-69	YDL133C-A	165085.6	NULL	0.006842389	0.006537796	0.055234254	0.040643643	0.010957184	0.039979603	0.459251685	0.100348246
736	743	YDL131W	chrIV	+	TATA-containing	TAF1-depleted	12395	227451	227357	-94	YDL131W	1398	NULL	0.027125386	0.006842389	0.040643643	0.577468662	0.091838902	0.120288243	0.929300411	0.039979603
737	744	YDL130W-A	chrIV	+	TATA-less	TAF1-enriched	4841	229157	229106	-51	YDL130W-A	775	NULL	1	0.001643552	0.005188608	NaN	0.050186187	NaN	1	0.080118314
738	745	YDL130W	chrIV	+	TATA-less	TAF1-enriched	23246	NA	229887	NA	YDL130W	156065	NULL	0.004055953	0.004055953	0.573775404	0.573775404	0.358771893	0.092176992	0.081905613	0.026183688
739	746	orphan	chrIV	-	TATA-less	TAF1-enriched	19	230202	230243	-41	orphan	0.4	NULL	0.411313792	NaN	NaN	0.220671362	NA	0.220671362	NA	NaN
740	747	YDL129W	chrIV	+	TATA-less	TAF1-enriched	370	230936	230919	-17	YDL129W	1049.5	NULL	0.073517488	0.008246738	1	0.686130413	0.007259955	0.59928633	0.547986032	0.048798093
741	748	YDL128W	chrIV	+	TATA-less	TAF1-enriched	97192	232668	232601	-67	YDL128W	9998.7	NULL	0.04838244	0.440673311	0.14472819	0.507386527	0.345986525	0.507386527	1	0.14472819
742	749	ANT110	chrIV	-	TATA-less	TAF1-enriched	7	NA	233911	NA	ANT110	39.8	NULL	0.460606061	0.008080808	0.533333333	0.694417686	0.808080808	0.694417686	0.670582894	0.895493084
743	750	orphan	chrIV	+	TATA-less	TAF1-enriched	18	234739	234720	-19	orphan	121.7	NULL	0.551517708	0.060362915	0.694417686	0.048798093	0.268767553	1	0.123046028	0.792771379
744	751	YDL127W	chrIV	+	TATA-containing	TAF1-depleted	228	234921	234873	-48	YDL127W	220.9	NULL	0.001733589	0.215924939	0.080118314	NaN	0.215924939	0.005188608	0.01012654	NaN
745	752	YDL126C	chrIV	-	TATA-less	TAF1-enriched	21628	238665	238714	-49	YDL126C	21280.7	NULL	0.004532406	0.004782003	0.026183688	0.026183688	0.004055953	0.026183688	0.117305564	0.02677094
746	753	orphan	chrIV	-	TATA-less	TAF1-enriched	8153	239546	239592	-46	orphan	4344	NULL	0.858888097	0.056297	0.17090352	0.779106125	0.184897599	1	0.256747856	1
747	754	YDL125C	chrIV	-	TATA-less	TAF1-depleted	1989	NA	239752	NA	YDL125C	2086.9	NULL	0.125786425	0.189854027	0.671784971	1	0.125786425	0.889986861	0.858888097	0.295641821
748	755	YDL124W	chrIV	+	TATA-containing	TAF1-depleted	32133	240229	240214	-15	YDL124W	2888.9	NULL	0.068964333	0.007910597	0.081865671	0.288844366	0.667829275	0.047417494	0.099877403	0.143471009
749	756	orphan	chrIV	+	TATA-containing	TAF1-enriched	1292	241426	241388	-38	orphan	747.8	NULL	0.006537796	0.065817128	0.039979603	0.193930852	0.006740038	0.193930852	0.065817128	0.295641821
750	757	YDL123W	chrIV	+	TATA-containing	TAF1-enriched	1915	241426	241391	-35	YDL123W	747.8	NULL	0.006537796	0.065817128	0.039979603	0.193930852	0.006740038	0.193930852	0.065817128	0.295641821
751	758	YDL121C	chrIV	-	TATA-less	TAF1-enriched	533	245569	245601	-32	YDL121C	1657.3	NULL	0.004866885	0.004952607	0.02677094	0.105671625	0.004614763	0.746885633	0.358326467	0.027362545
752	759	YDL120W	chrIV	+	TATA-less	TAF1-enriched	351	245880	245843	-37	YDL120W	3688.8	NULL	0.280491716	0.005855932	0.034132951	0.177015983	0.00503917	0.87832485	0.282425348	0.033499083
753	760	YDL119C	chrIV	-	TATA-less	TAF1-enriched	97	247602	247756	-154	YDL119C	277.4	NULL	0.123046028	0.008021847	0.116073943	0.044444444	0.148125677	0.266666667	0.144554389	0.044444444
754	761	CUT481	chrIV	-	TATA-less	TAF1-enriched	27	247965	248028	-63	CUT481	55.8	NULL	0.932206034	0.007910597	0.359305232	0.048798093	0.148125677	0.694417686	0.013460069	1
755	762	YDL117W	chrIV	+	TATA-less	TAF1-depleted	57	248598	248278	-320	YDL117W	398.1	NULL	0.864190848	0.007910597	0.065915952	0.595883091	0.007910597	0.049491231	0.729976105	0.147232255
756	763	YDL116W	chrIV	+	TATA-less	TAF1-enriched	994	251552	251508	-44	YDL116W	1007.5	NULL	0.001688186	0.001733589	0.005188608	0.004915802	0.128645924	0.005188608	0.215924939	NaN
757	764	YDL115C	chrIV	-	TATA-less	TAF1-enriched	413	255116	255168	-52	YDL115C	869.6	NULL	0.007049543	0.128645924	0.076031041	0.779106125	0.045989475	0.124220661	0.128645924	0.344156576
758	765	YDL112W	chrIV	+	TATA-less	TAF1-enriched	283	258896	258870	-26	YDL112W	996.3	NULL	0.389912585	0.067055825	0.135166272	0.034132951	0.017507844	0.550097317	0.00576184	0.413176151
759	766	YDL111C	chrIV	-	TATA-less	TAF1-enriched	768	264117	264163	-46	YDL111C	1800.1	NULL	0.001733589	0.009454169	1	NaN	0.125786425	0.080118314	NaN	NaN
760	767	orphan	chrIV	+	TATA-less	TAF1-enriched	45	264481	264464	-17	orphan	47.3	NULL	0.233663465	0.682828283	0.711111111	1	0.332739927	0.600401848	0.199557256	0.793389781
761	768	YDL110C	chrIV	-	TATA-containing	TAF1-depleted	112	264944	265021	-77	YDL110C	1460.3	NULL	0.339899051	0.007154342	0.042651237	0.415937626	0.006842389	0.041979528	0.006842389	0.042651237
762	769	YDL108W	chrIV	+	TATA-less	TAF1-enriched	98	267683	267675	-8	YDL108W	184.2	NULL	0.367676768	1	0.888888889	0.711111111	0.932087071	0.4	0.282828283	0.711111111
763	770	YDL106C	chrIV	-	TATA-less	TAF1-enriched	1218	271911	271950	-39	YDL106C	1582.6	NULL	0.004133256	0.128645924	0.027362545	1	0.004133256	0.02677094	1	0.260832152
764	771	YDL105W	chrIV	+	TATA-less	TAF1-enriched	161	272407	272345	-62	YDL105W	240.4	NULL	0.341654836	0.348546687	0.359305232	0.508708087	0.346843113	1	0.012972764	0.357835467
765	772	YDL104C	chrIV	-	TATA-less	TAF1-depleted	326	274710	274860	-150	YDL104C	98.3	NULL	0.345986525	0.059909304	0.424874689	0.048106828	1	0.291840545	0.606584521	0.790241066
766	773	YDL103C	chrIV	-	TATA-less	TAF1-depleted	1605	276602	276648	-46	YDL103C	1975.8	NULL	0.046784411	0.929832618	0.079919784	0.303193256	0.019373319	0.303193256	0.129595844	0.303193256
767	774	YDL102W	chrIV	+	TATA-less	TAF1-enriched	233	NA	276786	NA	YDL102W	1171.7	NULL	0.004782003	0.035950616	0.02677094	0.092176992	0.004055953	0.871798602	1	0.573775404
768	775	YDL101C	chrIV	-	TATA-less	TAF1-enriched	96	281847	281869	-22	YDL101C	604.5	NULL	0.083264517	0.007366379	0.045361665	0.415937626	0.86123563	0.411313792	0.150163594	0.132006336
769	776	orphan	chrIV	+	TATA-less	TAF1-enriched	0	282157	282140	-17	orphan	7.1	NULL	0.917960783	0.266236144	0.288844366	0.691728538	0.862737091	0.234230702	0.39159429	1
770	777	YDL100C	chrIV	-	TATA-less	TAF1-enriched	3824	283171	283212	-41	YDL100C	12928	NULL	0.794279474	0.033359567	0.342584628	0.494997202	0.193119366	0.67502412	0.600670882	0.042651237
771	778	YDL097C	chrIV	-	TATA-less	TAF1-enriched	1571	NA	286705	NA	YDL097C	15628.3	NULL	0.663276399	0.006842389	0.295641821	0.039979603	0.006537796	0.039979603	0.016387834	0.295641821
772	779	YDL095W	chrIV	+	TATA-less	TAF1-enriched	4147	287069	287026	-43	YDL095W	3145.6	NULL	0.055847711	1	0.042651237	0.684195574	0.110933328	0.219338776	0.791268113	0.587593848
773	780	YDL093W	chrIV	+	TATA-less	TAF1-enriched	1100	289891	289880	-11	YDL093W	224.3	NULL	0.082703863	0.012335776	1	0.587593848	0.100493741	0.278075687	1	0.2811981
774	781	CUT482	chrIV	-	TATA-less	TAF1-enriched	802	292522	292568	-46	CUT482	29.8	NULL	0.932087071	0.607225552	0.359305232	0.512610438	0.172722365	1	0.145270893	0.694417686
775	782	YDL092W	chrIV	+	TATA-less	TAF1-enriched	822	292802	292758	-44	YDL092W	876.1	NULL	0.068459684	1	0.046730149	0.339408154	1	0.893187858	0.722155497	0.14094646
776	783	YDL091C	chrIV	-	TATA-less	TAF1-enriched	406	294821	294851	-30	YDL091C	300.4	NULL	0.018716589	0.098026461	0.686130413	0.576150122	0.331829403	1	0.184897599	0.686130413
777	784	YDL089W	chrIV	+	TATA-less	TAF1-enriched	76	296744	296598	-146	YDL089W	514.2	NULL	0.670037641	0.007910597	0.894849724	0.59928633	0.550817954	0.59928633	0.026711985	0.293325574
778	785	YDL088C	chrIV	-	TATA-less	TAF1-depleted	1277	300075	300131	-56	YDL088C	309	NULL	0.006338844	0.006338844	0.036701192	0.141326003	0.017430599	0.03605437	0.724174148	0.036701192
779	786	YDL087C	chrIV	-	TATA-less	TAF1-enriched	910	300979	301018	-39	YDL087C	208.2	NULL	0.013296732	0.932087071	1	0.357835467	0.197959327	0.4291953	0.93196748	0.690816272
780	787	YDL086W	chrIV	+	TATA-containing	TAF1-enriched	283	301425	301403	-22	YDL086W	1703.6	NULL	0.177330783	0.015172523	0.208468351	0.035410671	0.087495838	0.06635304	1	0.03605437
781	788	YDL086C-A	chrIV	-	TATA-less	TAF1-enriched	124	302130	302183	-53	YDL086C-A	104.4	NULL	0.932206034	0.026979768	0.294801992	1	0.863951761	0.044444444	0.173477636	1
782	789	YDL085C-A	chrIV	-	TATA-less	TAF1-enriched	601	302694	302726	-32	YDL085C-A	3012.5	NULL	0.007366379	0.064936067	0.044680647	0.28274546	0.007154342	0.49356279	0.325355348	0.044680647
783	790	CUT483	chrIV	-	TATA-containing	TAF1-enriched	82	304804	304846	-42	CUT483	102.2	NULL	0.156512275	0.008133895	0.893187858	0.135857322	0.86123563	0.048106828	0.790882323	0.048106828
784	791	YDL084W	chrIV	+	TATA-less	TAF1-enriched	943	305115	305093	-22	YDL084W	10526.6	NULL	0.043622116	0.006537796	1	0.120288243	0.929963802	1	0.856417249	1
785	792	YDL083C	chrIV	-	TATA-less	TAF1-enriched	14846	307769	307807	-38	YDL083C	14688.1	NULL	0.006143194	0.006143194	0.03605437	0.283876475	0.005393812	1	0.12002519	0.03605437
786	793	YDL082W	chrIV	+	TATA-less	TAF1-enriched	18514	308427	308386	-41	YDL082W	9379.6	NULL	0.07542069	0.046265852	0.1622505	0.1622505	0.200787142	1	0.109574681	0.657788651
787	794	YDL081C	chrIV	-	TATA-less	TAF1-enriched	102114	310120	310180	-60	YDL081C	114327.8	NULL	0.547269697	0.024343384	0.501992689	0.176565351	0.328151669	0.046044853	0.119032898	0.133293185
788	795	CUT054	chrIV	+	TATA-less	TAF1-depleted	11	NA	310432	NA	CUT054	32.2	NULL	0.547269697	0.266236144	0.590013887	0.892500695	0.230364065	0.14472819	0.341654836	0.595883091
789	796	YDL080C	chrIV	-	TATA-less	TAF1-depleted	91	312457	312609	-152	YDL080C	387.6	NULL	0.004866885	0.004782003	0.623433341	0.146399099	0.609834044	0.146399099	0.017417759	0.026183688
790	797	ST0443	chrIV	+	TATA-less	TAF1-enriched	15	NA	312866	NA	ST0443	415.3	NULL	0.443097314	0.670037641	0.4291953	0.4291953	0.263680873	0.4291953	0.105411524	0.1484791
791	798	YDL078C	chrIV	-	TATA-containing	TAF1-enriched	419	316375	316451	-76	YDL078C	1481.3	NULL	0.72367361	0.007800146	0.083811901	0.048798093	0.017010283	0.048106828	0.010434401	0.083811901
792	799	YDL077C	chrIV	-	TATA-less	TAF1-enriched	313	320264	320254	10	YDL077C	374.5	NULL	0.864665265	0.495394415	0.792771379	0.114961001	0.60913007	0.59928633	0.932087071	0.59928633
793	800	YDL075W	chrIV	+	TATA-less	TAF1-enriched	5460	322257	322198	-59	YDL075W	95834.6	NULL	0.001733589	NaN	0.005188608	0.005188608	0.001688186	0.004915802	0.049238968	0.004915802
794	801	orphan	chrIV	+	TATA-less	TAF1-depleted	171	322941	322861	-80	orphan	826.4	NULL	0.798561763	0.733196121	0.238557044	0.895810367	0.932206034	0.512610438	0.797516299	0.512610438
795	802	ST0447	chrIV	+	TATA-containing	TAF1-depleted	10	323918	323790	-128	ST0447	88	NULL	0.256747856	0.006240605	1	1	0.017010283	0.301326595	0.215054122	0.301326595
796	803	YDL074C	chrIV	-	TATA-less	TAF1-enriched	203	326162	326228	-66	YDL074C	518.6	NULL	0.047182916	0.007910597	0.046730149	0.14472819	0.009897647	0.110492024	0.007800146	0.046044853
797	804	YDL073W	chrIV	+	TATA-less	TAF1-enriched	1222	326466	326433	-33	YDL073W	158.7	NULL	0.006240605	0.042839137	0.036701192	0.283876475	0.006240605	0.112351198	0.087495838	0.03605437
798	805	YDL072C	chrIV	-	TATA-less	TAF1-enriched	23312	330440	330491	-51	YDL072C	4382.8	NULL	0.006740038	0.295460336	0.041979528	0.122912677	0.192305942	0.299445905	0.024552898	0.041310308
799	806	ST0450	chrIV	+	TATA-less	TAF1-enriched	37	330853	330733	-120	ST0450	77.3	NULL	0.073010712	0.036700635	1	0.4291953	0.032822933	0.693529129	0.103570182	0.084784996
800	807	YDL070W	chrIV	+	TATA-containing	TAF1-depleted	3505	331097	331005	-92	YDL070W	7754.7	NULL	0.16043202	0.387337939	0.044001861	0.044680647	0.007154342	0.044001861	0.007473611	0.044680647
801	808	YDL067C	chrIV	-	TATA-less	TAF1-enriched	1969	334382	334442	-60	YDL067C	1673.2	NULL	0.006945558	0.006740038	0.671784971	0.470486422	0.006537796	0.470486422	0.377660987	0.040643643
802	809	YDL066W	chrIV	+	TATA-less	TAF1-enriched	33255	334849	334811	-38	YDL066W	2788.2	NULL	0.001733589	0.009454169	0.080118314	NaN	0.128645924	NaN	NaN	0.004915802
803	810	YDL065C	chrIV	-	TATA-less	TAF1-enriched	106	337252	337288	-36	YDL065C	339.5	NULL	0.488422317	0.440673311	0.894849724	0.238557044	1	0.049491231	0.550114935	0.188991722
804	811	YDL063C	chrIV	-	TATA-less	TAF1-enriched	639	340189	340221	-32	YDL063C	1365.7	NULL	0.006945558	1	0.079919784	1	0.006945558	0.686130413	0.183229817	0.135857322
805	812	YDL061C	chrIV	-	TATA-less	TAF1-enriched	806	341196	341251	-55	YDL061C	988	NULL	0.393272891	0.008360374	0.088675943	0.049491231	0.016832249	0.1484791	0.931847255	0.088675943
806	813	YDL060W	chrIV	+	TATA-less	TAF1-enriched	247	341625	341582	-43	YDL060W	1649.7	NULL	0.005950856	0.006740038	0.780595556	0.273321678	0.125786425	0.889986861	0.374943961	0.295641821
807	814	YDL059C	chrIV	-	TATA-less	TAF1-enriched	229	345038	345056	-18	YDL059C	199.9	NULL	0.493101793	0.008021847	1	0.426325543	0.862737091	0.508708087	0.930987447	0.210044337
808	815	YDL058W	chrIV	+	TATA-less	TAF1-enriched	2524	345667	345599	-68	YDL058W	1452.6	NULL	0.005950856	0.006240605	0.036701192	0.329609605	0.005393812	0.206884586	0.919314259	0.036701192
809	816	YDL057W	chrIV	+	TATA-less	TAF1-enriched	208	351480	351426	-54	YDL057W	176.8	NULL	0.16585666	0.007259955	0.342584628	0.494997202	0.849461395	0.210044337	0.289756002	0.659023837
810	817	CUT487	chrIV	-	TATA-less	TAF1-enriched	42	352579	352610	-31	CUT487	69.1	NULL	0.267082584	0.201147528	0.237122014	0.237122014	0.200353348	0.357835467	0.393272891	0.237122014
811	818	YDL056W	chrIV	+	TATA-less	TAF1-enriched	611	352820	352765	-55	YDL056W	526.3	NULL	0.102340692	0.007800146	0.046044853	0.104870291	0.007690497	0.104870291	0.16585666	0.046044853
812	819	YDL055C	chrIV	-	TATA-containing	TAF1-depleted	8385	356878	356908	-30	YDL055C	13704.5	NULL	0.044802434	0.006842389	0.295641821	0.470486422	0.125786425	0.470486422	0.021804466	0.295641821
813	820	orphan	chrIV	-	TATA-less	TAF1-enriched	63	357580	357592	-12	orphan	13.3	NULL	1	0.93148272	0.895493084	0.894523556	0.347696494	0.357835467	1	0.895493084
814	821	orphan	chrIV	+	TATA-less	TAF1-enriched	32	358429	358435	6	orphan	21.6	NULL	1	0.932206034	0.694417686	0.694417686	0.668385514	0.895810367	0.268767553	0.895810367
815	822	YDL054C	chrIV	-	TATA-less	TAF1-enriched	5170	361317	361363	-46	YDL054C	1706.8	NULL	0.360765351	0.004133256	0.576150122	0.576150122	0.147320903	0.576150122	0.543329872	0.576150122
816	823	YDL053C	chrIV	-	TATA-containing	TAF1-depleted	253	362406	362454	-48	YDL053C	589.1	NULL	0.007800146	0.007690497	0.132006336	0.046044853	0.026258184	0.046044853	0.012652434	0.132006336
817	824	YDL052C	chrIV	-	TATA-less	TAF1-enriched	472	363581	363619	-38	YDL052C	762.6	NULL	0.439858381	0.524071423	0.231310785	0.684195574	1	0.684195574	0.524071423	0.684195574
818	825	YDL051W	chrIV	+	TATA-less	TAF1-enriched	1490	364097	363929	-168	YDL051W	4900.6	NULL	0.100493741	0.009765619	0.045361665	0.109370684	0.006740038	0.68989587	1	0.045361665
819	826	YDL049C	chrIV	-	TATA-less	TAF1-depleted	65	NA	365940	NA	YDL049C	186.1	NULL	0.347696494	0.347696494	0.598161453	0.344156576	0.145986278	0.507386527	0.440673311	0.087703529
820	827	orphan	chrIV	-	TATA-less	TAF1-enriched	237	366538	366759	-221	orphan	85.8	NULL	0.349393711	0.306482234	0.888888889	0.711111111	0.282828283	0.711111111	0.041184163	0.088888889
821	828	CUT489	chrIV	-	TATA-less	TAF1-enriched	1981	368155	368261	-106	CUT489	7256	NULL	0.005950856	0.183229817	0.480085003	0.550097317	0.091218926	0.034132951	0.037635314	0.034132951
822	829	orphan	chrIV	+	TATA-less	TAF1-enriched	26	369002	368859	-143	orphan	13.9	NULL	0.199557256	0.549408625	0.354866599	0.354866599	1	0.894849724	0.931847255	0.234230702
823	830	YDL047W	chrIV	+	TATA-less	TAF1-enriched	2375	369799	369626	-173	YDL047W	1420.4	NULL	0.931112271	0.43573066	0.104870291	0.49783023	0.015128341	1	0.540666674	0.104870291
824	831	YDL046W	chrIV	+	TATA-containing	TAF1-enriched	18279	371227	371178	-49	YDL046W	1787.2	NULL	0.032207629	0.131471079	0.046730149	0.084784996	0.007910597	0.080892654	0.120373467	0.104870291
825	832	ST4129	chrIV	-	TATA-containing	TAF1-enriched	102	371965	372002	-37	ST4129	297.8	NULL	0.087748841	0.008246738	1	0.049491231	0.303052329	0.049491231	0.050394337	0.184897599
826	833	YDL045W-A	chrIV	+	TATA-containing	TAF1-enriched	7257	372254	372204	-50	YDL045W-A	254.3	NULL	0.795012172	0.042059394	0.042651237	0.344156576	0.007259955	0.494997202	0.715823013	0.041979528
827	834	YDL045C	chrIV	-	TATA-less	TAF1-enriched	116	373700	373759	-59	YDL045C	2675.7	NULL	0.042448854	0.220150713	0.036701192	0.141326003	0.10274879	0.421881247	0.839844013	0.657788651
828	835	orphan	chrIV	-	TATA-less	TAF1-enriched	102	NA	375299	NA	orphan	197.5	NULL	1	0.332739927	1	0.357835467	0.670037641	0.888888889	0.56969697	1
829	836	YDL043C	chrIV	-	TATA-less	TAF1-enriched	287	376463	376518	-55	YDL043C	173.1	NULL	0.931726391	1	1	0.512610438	0.732743159	1	1	0.694417686
830	837	YDL042C	chrIV	-	TATA-less	TAF1-enriched	974	378454	378492	-38	YDL042C	700.8	NULL	0.033441628	0.007259955	0.188991722	0.694417686	0.017219911	0.508708087	0.060362915	0.114961001
831	838	YDL040C	chrIV	-	TATA-less	TAF1-enriched	12373	381428	381484	-56	YDL040C	1182	NULL	0.088116673	0.016594238	0.889986861	1	0.065817128	0.889986861	0.789711992	0.577468662
832	839	ST0462	chrIV	+	TATA-less	TAF1-enriched	42	381860	381672	-188	ST0462	13.1	NULL	0.050394337	0.201147528	0.895810367	0.188991722	0.731830274	1	0.797516299	0.238557044
833	840	YDL037C	chrIV	-	TATA-less	TAF1-enriched	1564	385748	385765	-17	YDL037C	104.4	NULL	0.441484761	0.010570734	0.293325574	0.430614455	0.797866593	0.188991722	0.932087071	0.595883091
834	841	orphan	chrIV	+	TATA-less	TAF1-enriched	11	NA	387245	NA	orphan	76.7	NULL	0.808080808	0.201939802	0.711111111	0.359305232	0.808080808	0.888888889	1	0.4
835	842	YDL036C	chrIV	-	TATA-less	TAF1-enriched	10	388842	388886	-44	YDL036C	602.1	NULL	0.101109741	0.007800146	0.690816272	0.133293185	0.190673275	0.228361945	0.062430421	0.894523556
836	843	YDL035C	chrIV	-	TATA-less	TAF1-enriched	244	392281	392350	-69	YDL035C	141.8	NULL	0.733196121	0.013460069	0.048798093	0.693529129	0.349393711	0.049491231	0.346843113	0.188991722
837	844	YDL033C	chrIV	-	TATA-less	TAF1-enriched	137	393905	393947	-42	YDL033C	307.5	NULL	0.144554389	0.330915337	0.048798093	0.1484791	0.007800146	0.18763233	0.302187416	0.137134544
838	845	YDL031W	chrIV	+	TATA-less	TAF1-enriched	219	394210	394144	-66	YDL031W	791.7	NULL	0.007800146	0.006842389	1	0.06260547	0.487629882	0.046730149	0.016065427	0.484695003
839	846	YDL030W	chrIV	+	TATA-less	TAF1-enriched	154	397484	397458	-26	YDL030W	210.7	NULL	0.021396137	0.439039945	0.048106828	0.1484791	0.796454389	0.048798093	0.732743159	0.353367292
840	847	YDL029W	chrIV	+	TATA-less	TAF1-enriched	1010	399386	399312	-74	YDL029W	1238.7	NULL	0.004532406	0.004697962	1	0.623433341	0.004532406	0.092176992	0.004055953	1
841	848	YDL028C	chrIV	-	TATA-less	TAF1-enriched	360	403412	403415	-3	YDL028C	254.6	NULL	0.932087071	0.008133895	1	0.138408493	0.72903449	0.14972246	0.493101793	1
842	849	YDL027C	chrIV	-	TATA-less	TAF1-enriched	968	404954	404990	-36	YDL027C	570.9	NULL	0.338129828	0.293333361	0.682224553	0.772829993	0.029184651	0.040643643	0.47495854	0.193930852
843	850	YDL025W-A	chrIV	+	TATA-containing	TAF1-enriched	165	405428	405225	-203	YDL025W-A	44.9	NULL	0.088869286	0.551517708	0.711111111	0.711111111	0.733646789	0.357835467	0.39159429	0.177777778
844	851	YDL025C	chrIV	-	TATA-less	TAF1-enriched	1107	407226	407353	-127	YDL025C	653.9	NULL	0.031901272	0.93148272	0.688967208	0.231310785	0.540666674	0.046044853	0.007690497	0.688967208
845	852	ST0466	chrIV	+	TATA-less	TAF1-enriched	89	407798	407607	-191	ST0466	25.4	NULL	0.60913007	0.436563363	0.792771379	0.359305232	0.148125677	0.359305232	0.266236144	0.512610438
846	853	orphan	chrIV	-	TATA-containing	TAF1-depleted	3	408042	408073	-31	orphan	19.2	NULL	0.201939802	1	0.686130413	0.512610438	0.797516299	0.512610438	0.148125677	0.512610438
847	854	orphan	chrIV	-	TATA-less	TAF1-enriched	58	411087	411168	-81	orphan	19.8	NULL	0.104184357	0.008021847	0.787615767	0.787615767	0.145270893	0.234230702	0.332739927	0.288844366
848	855	YDL022W	chrIV	+	TATA-containing	TAF1-depleted	53299	411894	411751	-143	YDL022W	899.4	NULL	0.201939802	0.268767553	0.14972246	0.088675943	0.148125677	1	0.670582894	0.049491231
849	856	CUT491	chrIV	-	TATA-less	TAF1-enriched	158	414719	414759	-40	CUT491	59.9	NULL	1	0.016161616	1	0.044444444	0.733646789	0.044444444	0.170447443	0.294801992
850	857	YDL020C	chrIV	-	TATA-containing	TAF1-enriched	41	NA	416952	NA	YDL020C	619.2	NULL	0.433848066	0.050186187	0.080118314	0.080118314	0.001688186	0.080118314	NaN	NaN
851	858	CUT057	chrIV	+	TATA-less	TAF1-enriched	3	417303	417268	-35	CUT057	17.9	NULL	0.670037641	0.201939802	1	0.14972246	0.443898466	0.14972246	0.349393711	0.792771379
852	859	YDL019C	chrIV	-	TATA-less	TAF1-enriched	577	421489	421645	-156	YDL019C	267.8	NULL	0.153535354	0.233663465	0.177777778	0.06674615	0.808080808	0.085758003	0.443097314	0.432023291
853	860	YDL018C	chrIV	-	TATA-less	TAF1-depleted	347	423520	423570	-50	YDL018C	721.1	NULL	0.122563702	1	0.105671625	0.576150122	0.004952607	0.148263844	1	0.629879079
854	861	CUT059	chrIV	+	TATA-containing	TAF1-enriched	15	423951	423834	-117	CUT059	27.4	NULL	1	0.731370313	0.357835467	0.894523556	0.931604881	0.28733307	0.303052329	0.357835467
855	862	YDL017W	chrIV	+	TATA-less	TAF1-enriched	130	424132	424123	-9	YDL017W	194.1	NULL	1	0.038364038	0.354866599	0.590013887	1	0.426325543	0.603331772	1
856	863	YDL015C	chrIV	-	TATA-less	TAF1-enriched	6636	426933	426987	-54	YDL015C	9884.7	NULL	0.336347008	0.006842389	0.295641821	1	0.5827379	0.784191229	0.924719037	0.295641821
857	864	CUT492	chrIV	-	TATA-less	TAF1-enriched	73	NA	428712	NA	CUT492	18.2	NULL	0.551517708	0.933333333	0.711111111	0.711111111	0.109090909	0.711111111	0.282828283	1
858	865	YDL013W	chrIV	+	TATA-less	TAF1-enriched	33	428960	428932	-28	YDL013W	247.2	NULL	0.193119366	0.731830274	0.895810367	0.188991722	0.072504128	0.114961001	0.169686101	0.232774339
859	866	YDL012C	chrIV	-	TATA-containing	TAF1-enriched	26002	431486	431530	-44	YDL012C	5007.3	NULL	0.016387834	0.065438397	0.041979528	0.057677444	0.006842389	0.057677444	0.088116673	0.041979528
860	867	orphan	chrIV	-	TATA-less	TAF1-enriched	442	431721	431837	-116	orphan	236.7	NULL	0.670582894	0.106024499	0.895810367	0.895810367	0.072504128	0.694417686	0.798561763	0.694417686
861	868	orphan	chrIV	-	TATA-less	TAF1-depleted	491	431749	432014	-265	orphan	228	NULL	0.732743159	0.087188487	0.598161453	0.598161453	0.099877403	0.894523556	0.440673311	0.598161453
862	869	YDL010W	chrIV	+	TATA-less	TAF1-depleted	120	NA	432302	NA	YDL010W	377.4	NULL	0.932087071	0.103570182	0.59928633	0.694417686	0.550114935	0.359305232	0.493101793	1
863	870	YDL008W	chrIV	+	TATA-less	TAF1-enriched	218	433561	433476	-85	YDL008W	512.2	NULL	0.155478268	1	0.015975041	0.015975041	0.003329187	0.015975041	1	0.015975041
864	871	ST4152	chrIV	-	TATA-less	TAF1-enriched	84	433902	434058	-156	ST4152	255.6	NULL	0.337240128	0.008021847	0.356355957	0.047417494	0.790882323	0.893187858	0.164314297	0.68989587
865	872	tT(AGU)D	chrIV	-	TATA-less	-	161	434302	434347	-45	tT(AGU)D	195.2	NULL	0.447719307	1	0.480085003	0.480085003	0.393035392	0.480085003	1	0.263552477
866	873	YDL007W	chrIV	+	TATA-less	TAF1-enriched	372	438050	438009	-41	YDL007W	2362.9	NULL	0.015051346	0.002685983	0.015494295	0.802587349	0.003261123	0.136037128	0.595883091	0.033368235
867	874	YDL006W	chrIV	+	TATA-less	TAF1-depleted	191	439787	439622	-165	YDL006W	256.3	NULL	0.670582894	0.013624302	0.792771379	1	0.668385514	0.694417686	0.932087071	0.1484791
868	875	YDL005C	chrIV	-	TATA-less	TAF1-depleted	419	442309	442334	-25	YDL005C	162.6	NULL	0.797866593	0.549408625	0.895493084	0.598161453	1	0.895493084	1	1
869	876	YDL004W	chrIV	+	TATA-less	TAF1-enriched	1304	443014	442986	-28	YDL004W	4212.8	NULL	0.215924939	0.001313653	0.004915802	0.004915802	0.001688186	0.004915802	0.001313653	0.005188608
870	877	orphan	chrIV	-	TATA-less	TAF1-enriched	0	443825	443829	-4	orphan	26.8	NULL	0.932206034	0.266236144	0.088675943	1	0.864665265	0.430614455	0.797164177	0.359305232
871	878	ST4154	chrIV	-	TATA-less	TAF1-depleted	32	444234	444250	-16	ST4154	74.3	NULL	1	0.020713285	0.063431425	0.145981945	0.344263657	1	0.549408625	0.081865671
872	879	YDL003W	chrIV	+	TATA-containing	TAF1-depleted	156	444683	444559	-124	YDL003W	396	NULL	0.268767553	0.544370146	0.14972246	0.694417686	0.104184357	0.694417686	0.667829275	0.138408493
873	880	YDL002C	chrIV	-	TATA-less	TAF1-enriched	287	447458	447663	-205	YDL002C	1262.8	NULL	0.193930852	0.010957184	0.67502412	0.344156576	0.046386593	0.67502412	0.929700693	0.219338776
874	881	YDL001W	chrIV	+	TATA-less	TAF1-enriched	1416	447956	447926	-30	YDL001W	242.7	NULL	0.668385514	0.163540852	0.790882323	0.889235607	0.862982628	0.499229169	0.790104282	0.14472819
875	882	YDR001C	chrIV	-	TATA-containing	TAF1-depleted	2986	452502	452594	-92	YDR001C	4520.6	NULL	0.007259955	0.007259955	0.219338776	0.042651237	0.131471079	0.057677444	0.017219911	0.494997202
876	883	YDR002W	chrIV	+	TATA-less	TAF1-enriched	1185	453055	453016	-39	YDR002W	10498.6	NULL	0.007690497	0.007581651	0.046044853	0.045361665	0.012022825	0.045361665	0.067955329	0.061780727
877	884	YDR003W	chrIV	+	TATA-less	TAF1-depleted	141	454106	454085	-21	YDR003W	906.3	NULL	0.021625614	0.026445101	1	0.895810367	0.021625614	0.790882323	0.123046028	0.357835467
878	885	YDR004W	chrIV	+	TATA-less	TAF1-enriched	77	455304	455240	-64	YDR004W	229.2	NULL	0.145270893	0.007910597	0.693529129	0.354866599	0.670582894	0.354866599	0.732287883	0.188991722
879	886	YDR005C	chrIV	-	TATA-less	TAF1-depleted	1900	458177	458211	-34	YDR005C	728.6	NULL	0.256747856	0.063431425	0.89386201	0.68989587	0.263680873	0.064258531	0.796810213	0.048106828
880	887	YDR006C	chrIV	-	TATA-less	TAF1-enriched	2574	461164	461286	-122	YDR006C	353.1	NULL	0.796454389	0.200353348	0.510019168	0.356355957	0.199557256	0.791517735	0.545826818	0.147232255
881	888	YDR007W	chrIV	+	TATA-containing	TAF1-depleted	99	NA	461632	NA	YDR007W	32.8	NULL	0.031291196	0.133675511	0.14472819	1	0.007800146	0.893187858	0.606584521	0.081865671
882	889	orphan	chrIV	+	TATA-less	TAF1-enriched	4	465173	464986	-187	orphan	1.3	NULL	0.560509091	1	1	NA	0.608873782	0.72903449	0.314994999	0.72903449
883	890	YDR011W	chrIV	+	TATA-less	TAF1-depleted	129	465744	465594	-150	YDR011W	388.8	NULL	0.443898466	0.148125677	0.084784996	0.694417686	0.104798141	0.293325574	0.394107149	0.084784996
884	891	YDR012W	chrIV	+	TATA-less	TAF1-depleted	41561	471866	471815	-51	YDR012W	12581.5	NULL	0.228700567	0.330915337	0.894194334	0.685167447	0.102955624	0.065086726	0.929700693	0.894194334
885	892	YDR013W	chrIV	+	TATA-less	TAF1-enriched	1465	473187	473141	-46	YDR013W	616.1	NULL	0.930987447	0.007154342	0.67502412	0.67502412	0.791268113	1	0.790882323	0.301326595
886	893	YDR016C	chrIV	-	TATA-less	TAF1-enriched	138	478749	478791	-42	YDR016C	1272.5	NULL	0.01012654	0.001733589	0.080118314	NaN	0.001313653	0.005188608	0.010355673	NaN
887	894	orphan	chrIV	+	TATA-less	TAF1-enriched	3	481789	481738	-51	orphan	0.9	NULL	1	1	NA	NA	NA	NA	0.196705602	NA
888	895	orphan	chrIV	+	TATA-less	TAF1-enriched	149	481986	481984	-2	orphan	28.8	NULL	0.282828283	0.048484848	0.190345809	0.266666667	0.56969697	0.533333333	1	0.190345809
889	896	CUT062	chrIV	+	TATA-less	TAF1-enriched	21	NA	482589	NA	CUT062	14.9	NULL	0.345126713	0.797164177	0.895493084	0.1484791	0.040120865	0.1484791	0.30562919	0.4291953
890	897	YDR019C	chrIV	-	TATA-containing	TAF1-enriched	289	485241	485290	-49	YDR019C	1111.3	NULL	0.032207629	0.267926383	0.188991722	0.238557044	0.007910597	0.895810367	0.08830911	0.049491231
891	898	YDR020C	chrIV	-	TATA-less	TAF1-depleted	210	486500	486566	-66	YDR020C	245.6	NULL	0.184897599	0.029758067	0.375651673	0.03605437	0.536101864	0.035410671	0.130570018	0.06635304
892	899	YDR022C	chrIV	-	TATA-less	TAF1-enriched	346	488836	488881	-45	YDR022C	75.7	NULL	0.012178835	1	0.058495155	0.659023837	0.537638448	0.889235607	0.795375598	0.079919784
893	900	tV(UAC)D	chrIV	+	TATA-less	-	0	489139	488883	-256	tV(UAC)D	0.2	NULL	NA	NA	NA	NA	NA	NA	NA	NA
894	901	ST4168	chrIV	-	TATA-containing	TAF1-enriched	208	489142	489210	-68	ST4168	120.2	NULL	0.931726391	0.931604881	0.048798093	1	0.087748841	1	0.668385514	0.895493084
895	902	YDR023W	chrIV	+	TATA-containing	TAF1-enriched	3496	489534	489474	-60	YDR023W	11888.5	NULL	0.001556573	0.009454169	0.004915802	0.080118314	0.128645924	0.080118314	0.215924939	0.004915802
896	903	YDR025W	chrIV	+	TATA-less	TAF1-enriched	118633	491537	491501	-36	YDR025W	17171.3	NULL	0.006015239	0.027980503	0.02677094	0.178744044	0.069511238	0.10298543	0.245278117	0.576150122
897	904	YDR027C	chrIV	-	TATA-less	TAF1-enriched	65	497394	497440	-46	YDR027C	213.2	NULL	1	0.015128341	0.232774339	0.113846298	1	0.065086726	0.124377909	0.894523556
898	905	YDR028C	chrIV	-	TATA-less	TAF1-enriched	1857	501327	501373	-46	YDR028C	1866.2	NULL	0.796810213	0.007690497	0.784191229	0.894194334	0.141677259	0.68989587	0.102955624	0.893187858
899	906	CUT064	chrIV	+	TATA-less	TAF1-enriched	21	501563	501508	-55	CUT064	61.8	NULL	0.349393711	0.021625614	0.359305232	0.895810367	0.551517708	0.694417686	0.551517708	0.138408493
900	907	YDR032C	chrIV	-	TATA-containing	TAF1-depleted	31578	504644	504757	-113	YDR032C	2510.4	NULL	0.668938973	0.007581651	0.047417494	0.354866599	0.008021847	0.145981945	0.094316816	0.046730149
901	908	orphan	chrIV	+	TATA-less	TAF1-enriched	32	506263	506130	-133	orphan	4.3	NULL	0.266236144	0.166625576	0.324723182	0.418492233	0.929832618	0.894849724	1	1
902	909	ST0505	chrIV	+	TATA-less	TAF1-enriched	133	506443	506361	-82	ST0505	80.8	NULL	0.145270893	0.657313488	0.110492024	0.417455426	0.140232086	0.417455426	0.434894327	0.084784996
903	910	YDR033W	chrIV	+	TATA-containing	TAF1-depleted	18301	508209	507901	-308	YDR033W	4365.2	NULL	0.007259955	0.011408183	0.042651237	0.058495155	0.006338844	0.042651237	0.596577576	0.042651237
904	911	YDR034C	chrIV	-	TATA-less	TAF1-enriched	475	512208	512248	-40	YDR034C	88.1	NULL	0.304773202	0.545826818	0.087703529	0.685167447	0.665005542	0.690816272	0.122378978	0.18763233
905	912	orphan	chrIV	+	TATA-less	TAF1-depleted	15	NA	512559	NA	orphan	473.6	NULL	0.129595844	0.001733589	0.005188608	NaN	0.001688186	0.004915802	NaN	0.080118314
906	913	orphan	chrIV	-	TATA-less	TAF1-enriched	1483	512715	512744	-29	orphan	60.2	NULL	1	0.040828988	0.234230702	0.234230702	0.201147528	0.359305232	0.349393711	0.895810367
907	914	tL(UAA)D	chrIV	+	TATA-less	-	229	519755	519731	-24	tL(UAA)D	50.7	NULL	0.297569609	0.524902502	0.303193256	0.303193256	0.129595844	0.303193256	0.927771977	0.303193256
908	915	orphan	chrIV	+	TATA-less	TAF1-enriched	35	NA	519996	NA	orphan	372.7	NULL	0.232842047	0.731370313	0.59928633	0.085758003	0.171965576	0.356355957	0.864665265	0.238557044
909	916	tQ(UUG)D1	chrIV	+	TATA-less	-	592	520976	520961	-15	tQ(UUG)D1	19	NULL	0.838256486	0.838256486	0.419740503	0.765087193	0.628298637	1	0.266947566	0.419740503
910	917	YDR035W	chrIV	+	TATA-less	TAF1-depleted	24556	521895	521737	-158	YDR035W	1910.2	NULL	0.197157484	0.261101437	0.046044853	0.132006336	0.006740038	0.688967208	0.489211129	0.046044853
911	918	YDR036C	chrIV	-	TATA-less	TAF1-enriched	2369	524735	524764	-29	YDR036C	383.4	NULL	0.33901613	0.007259955	0.042651237	0.301326595	0.133675511	0.042651237	0.128645924	0.076031041
912	919	YDR037W	chrIV	+	TATA-containing	TAF1-enriched	5852	525452	525391	-61	YDR037W	7199.9	NULL	0.004952607	0.004866885	1	0.518605016	1	0.02677094	0.685337702	0.02677094
913	920	YDR041W	chrIV	+	TATA-less	TAF1-enriched	260	539830	539798	-32	YDR041W	779.5	NULL	0.068964333	0.015313822	0.210044337	0.892845929	0.085011657	0.058495155	0.116343478	0.04332537
914	921	orphan	chrIV	-	TATA-containing	TAF1-enriched	8761	541520	541700	-180	orphan	2823.5	NULL	0.492330692	0.348546687	0.237122014	0.511319908	0.346843113	0.084784996	0.440673311	0.237122014
915	922	ST0511	chrIV	+	TATA-less	TAF1-enriched	36	542397	542304	-93	ST0511	55.4	NULL	0.201939802	0.015313822	0.359305232	0.088675943	0.267926383	0.430614455	0.551517708	0.430614455
916	923	CUT065	chrIV	+	TATA-containing	TAF1-enriched	982	542870	542709	-161	CUT065	159.8	NULL	0.863711407	0.864665265	0.114961001	0.14972246	0.60913007	0.895810367	0.201939802	0.895810367
917	924	YDR043C	chrIV	-	TATA-containing	TAF1-depleted	1607	543414	543534	-120	YDR043C	623.4	NULL	0.342527737	0.047182916	0.044680647	0.228361945	0.006537796	0.044001861	0.007366379	0.044680647
918	925	ST0513	chrIV	+	TATA-less	TAF1-enriched	230	544094	544085	-9	ST0513	96.4	NULL	0.074024444	0.199557256	0.049491231	0.790882323	1	0.508708087	0.172722365	0.895810367
919	926	orphan	chrIV	-	TATA-less	TAF1-enriched	124	545570	545670	-100	orphan	33.6	NULL	0.864900617	0.004040404	0.044444444	0.044444444	0.004040404	1	0.496151813	0.294801992
920	927	YDR044W	chrIV	+	TATA-containing	TAF1-depleted	2966	546701	546492	-209	YDR044W	10429.8	NULL	0.045197383	0.006842389	1	1	0.541414544	1	0.190673275	1
921	928	YDR045C	chrIV	-	TATA-less	TAF1-enriched	208	548406	548465	-59	YDR045C	306	NULL	0.045689646	0.65669965	0.375651673	0.888854163	0.045257016	0.049601028	0.217300922	0.375651673
922	929	YDR046C	chrIV	-	TATA-less	TAF1-depleted	1019	550661	550666	-5	YDR046C	1128.2	NULL	0.007154342	0.021167585	0.356355957	0.048798093	0.193119366	0.048798093	0.104798141	0.356355957
923	930	orphan	chrIV	+	TATA-less	TAF1-depleted	347	551494	551451	-43	orphan	128.8	NULL	0.662108674	0.103570182	0.081865671	0.133293185	0.012335776	0.133293185	0.728082961	0.081865671
924	931	YDR047W	chrIV	+	TATA-less	TAF1-enriched	555	NA	551715	NA	YDR047W	1201.8	NULL	0.2523249	0.042448854	0.036701192	0.125525756	0.006240605	0.125525756	0.042448854	0.125525756
925	932	YDR049W	chrIV	+	TATA-less	TAF1-enriched	48	553244	553226	-18	YDR049W	264.1	NULL	0.01819787	1	0.203693596	0.210044337	0.413662403	0.882614174	0.761209673	0.036701192
926	933	CUT496	chrIV	-	TATA-containing	TAF1-depleted	50	NA	555780	NA	CUT496	1405.8	NULL	0.443898466	0.349393711	0.894849724	1	0.551517708	1	0.266236144	0.894849724
927	935	YDR050C	chrIV	-	TATA-less	TAF1-depleted	4037	556408	556502	-94	YDR050C	54535.7	NULL	0.007259955	0.011408183	0.339408154	0.888854163	0.18820969	0.078947122	0.927628061	0.676082741
928	936	ST0517	chrIV	+	TATA-less	TAF1-enriched	100	557047	557014	-33	ST0517	62.2	NULL	0.197959327	0.049587742	0.1484791	0.048106828	0.668385514	0.048798093	0.048783581	0.693529129
929	937	YDR051C	chrIV	-	TATA-less	TAF1-enriched	69	558054	558106	-52	YDR051C	271.1	NULL	0.049185351	0.256747856	0.342584628	0.894194334	0.489211129	0.047417494	0.110933328	0.356355957
930	938	YDR052C	chrIV	-	TATA-less	TAF1-enriched	31	560727	560779	-52	YDR052C	320.5	NULL	0.038015068	0.296517172	0.232774339	0.348808623	0.030987496	0.484695003	0.583501956	0.14472819
931	939	YDR054C	chrIV	-	TATA-less	TAF1-enriched	491	562435	562439	-4	YDR054C	1392.3	NULL	0.487629882	0.795012172	1	1	0.042059394	0.786265613	0.794646803	0.075059873
932	940	orphan	chrIV	+	TATA-less	TAF1-enriched	19	562729	562671	-58	orphan	8.8	NULL	0.201147528	0.933333333	0.711111111	1	0.367676768	0.600401848	0.56969697	0.266666667
933	941	CUT066	chrIV	+	TATA-less	TAF1-enriched	142	563261	563233	-28	CUT066	87.4	NULL	0.56969697	1	0.533333333	0.533333333	0.460606061	0.177777778	0.460606061	0.793389781
934	942	YDR055W	chrIV	+	TATA-containing	TAF1-depleted	46851	563595	563466	-129	YDR055W	5746.4	NULL	0.005950856	0.058941833	0.039979603	0.039979603	0.005950856	0.039979603	0.005950856	0.039979603
935	943	YDR056C	chrIV	-	TATA-containing	TAF1-enriched	2086	565664	565690	-26	YDR056C	1093.6	NULL	0.551517708	0.551517708	0.512610438	0.188991722	0.670582894	0.293325574	0.443898466	0.694417686
936	944	YDR057W	chrIV	+	TATA-less	TAF1-enriched	763	565944	565899	-45	YDR057W	185.6	NULL	0.173916672	1	0.027362545	0.027362545	0.173916672	1	0.635869658	0.027362545
937	945	tR(UCU)D	chrIV	+	TATA-less	-	142	568865	568871	6	tR(UCU)D	1.1	NULL	NaN	NaN	NaN	NaN	0.288844366	0.288844366	NA	NA
938	946	YDR059C	chrIV	-	TATA-containing	TAF1-enriched	5277	569797	569829	-32	YDR059C	215.8	NULL	0.006945558	0.345986525	0.047417494	0.787615767	0.006945558	0.210044337	0.260236203	0.047417494
939	947	YDR061W	chrIV	+	TATA-less	TAF1-enriched	366	574249	574146	-103	YDR061W	564.2	NULL	0.004866885	0.004133256	0.178744044	0.03871668	0.022342981	0.027362545	0.006432383	0.178744044
940	948	ST4195	chrIV	-	TATA-less	TAF1-enriched	1651	575825	575830	-5	ST4195	81.3	NULL	0.932087071	0.214141414	0.294801992	0.711111111	0.303914253	0.294801992	0.460606061	0.190345809
941	949	YDR062W	chrIV	+	TATA-less	TAF1-enriched	785	576184	576107	-77	YDR062W	1392.3	NULL	0.006945558	0.006842389	0.039979603	0.040643643	0.006842389	0.039979603	0.15096232	0.040643643
942	950	CUT499	chrIV	-	TATA-less	TAF1-enriched	218	579077	579079	-2	CUT499	44.3	NULL	0.07542069	0.330915337	0.156375722	0.092393564	0.011796661	0.139793337	0.360824879	0.156375722
943	951	YDR064W	chrIV	+	TATA-less	TAF1-enriched	10518	579493	579429	-64	YDR064W	54185.2	NULL	0.215924939	NaN	0.080118314	NaN	0.001313653	NaN	NaN	0.004915802
944	952	YDR068W	chrIV	+	TATA-less	TAF1-enriched	51	583706	583673	-33	YDR068W	611.7	NULL	0.012022825	0.172197819	0.786265613	0.042651237	0.536872054	0.057677444	0.376759118	0.892500695
945	953	YDR069C	chrIV	-	TATA-less	TAF1-enriched	82	587737	587766	-29	YDR069C	376.2	NULL	1	0.006945558	1	0.508708087	1	0.234230702	0.266236144	1
946	954	CUT067	chrIV	+	TATA-less	TAF1-enriched	61	588035	588013	-22	CUT067	25.2	NULL	0.682828283	0.172722365	0.533333333	0.177777778	0.367676768	0.4	1	0.294801992
947	955	YDR071C	chrIV	-	TATA-less	TAF1-depleted	1739	589269	589465	-196	YDR071C	3257.2	NULL	1	NaN	0.005188608	NaN	0.215924939	NaN	NaN	0.080118314
948	956	YDR072C	chrIV	-	TATA-containing	TAF1-depleted	27399	591465	591470	-5	YDR072C	354.5	NULL	0.303914253	0.551517708	0.085758003	0.895810367	0.083264517	0.359305232	0.230364065	0.293325574
949	957	YDR073W	chrIV	+	TATA-containing	TAF1-depleted	625	592412	592280	-132	YDR073W	1959.4	NULL	0.008021847	0.032514852	0.048106828	0.082838773	0.008021847	0.082838773	0.59518502	0.047417494
950	958	ST4203	chrIV	-	TATA-less	TAF1-enriched	71	593257	593360	-103	ST4203	101.5	NULL	0.551517708	0.345986525	0.895810367	0.293325574	0.265387054	0.895810367	0.349393711	0.694417686
951	959	YDR074W	chrIV	+	TATA-less	TAF1-depleted	19017	593870	593799	-71	YDR074W	4386.8	NULL	0.007259955	0.030684702	0.786943898	0.686130413	0.165086234	0.686130413	0.930987447	0.22538387
952	960	YDR075W	chrIV	+	TATA-less	TAF1-enriched	105	597025	596982	-43	YDR075W	229.7	NULL	0.103570182	0.046386593	0.188991722	0.088675943	0.39159429	0.14972246	0.125042727	0.14972246
953	961	YDR076W	chrIV	+	TATA-less	TAF1-enriched	15	NA	598419	NA	YDR076W	90.9	NULL	0.30562919	0.123712341	0.693529129	0.895493084	0.548699	0.693529129	0.201147528	0.598161453
954	962	orphan	chrIV	-	TATA-less	TAF1-enriched	231	599288	599518	-230	orphan	422.4	NULL	1	0.049990741	0.293325574	0.293325574	1	0.188991722	1	0.188991722
955	963	YDR077W	chrIV	+	TATA-containing	TAF1-depleted	216827	600855	600756	-99	YDR077W	29967.9	NULL	0.001313653	0.001313653	0.005188608	0.080118314	0.01012654	0.004915802	0.215924939	0.004915802
956	964	YDR078C	chrIV	-	TATA-less	TAF1-depleted	119	602864	602886	-22	YDR078C	408.4	NULL	0.070479927	0.72903449	0.183522244	0.279641534	0.547986032	0.081865671	0.158868602	0.110492024
957	965	YDR080W	chrIV	+	TATA-less	TAF1-depleted	58	604030	603986	-44	YDR080W	867.6	NULL	0.007910597	0.72903449	0.049491231	1	0.008246738	0.114961001	1	0.049491231
958	966	YDR081C	chrIV	-	TATA-less	TAF1-enriched	540	610134	610168	-34	YDR081C	553.2	NULL	0.016065427	0.007800146	0.133293185	0.790241066	0.793538864	0.046730149	0.791268113	0.046044853
959	967	YDR082W	chrIV	+	TATA-less	TAF1-enriched	20	610565	610409	-156	YDR082W	231.6	NULL	0.128645924	0.001313653	0.005188608	0.080118314	0.001556573	0.080118314	0.049238968	NaN
960	968	YDR083W	chrIV	+	TATA-less	TAF1-depleted	19	NA	612057	NA	YDR083W	1305.3	NULL	0.06619258	0.245278117	0.015494295	0.015975041	0.002685983	0.015494295	0.058102437	0.015494295
961	969	YDR084C	chrIV	-	TATA-less	TAF1-depleted	1297	613999	614038	-39	YDR084C	2332.4	NULL	0.261101437	1	0.206884586	0.046044853	0.250535974	0.045361665	0.012335776	0.206884586
962	970	YDR086C	chrIV	-	TATA-less	TAF1-depleted	4809	617178	617256	-78	YDR086C	8648.8	NULL	0.182392986	0.145340804	1	0.256839258	0.051386612	0.484695003	0.848145301	0.765087193
963	971	ANT080	chrIV	+	TATA-less	TAF1-enriched	10	617680	617518	-162	ANT080	19.3	NULL	0.268767553	0.798215076	0.694417686	1	0.443898466	0.694417686	0.551517708	0.691728538
964	972	YDR087C	chrIV	-	TATA-less	TAF1-depleted	463	618303	618346	-43	YDR087C	1073.7	NULL	0.046784411	1	0.14972246	0.088888889	0.046784411	0.511319908	0.230364065	0.14972246
965	973	YDR088C	chrIV	-	TATA-containing	TAF1-enriched	128	619808	619839	-31	YDR088C	200.8	NULL	0.378559083	0.019594216	1	1	0.859683795	1	0.046784411	0.345717816
966	974	ST4216	chrIV	-	TATA-less	TAF1-enriched	61	621438	621560	-122	ST4216	50.2	NULL	0.026711985	0.104798141	0.088675943	0.512610438	0.349393711	0.694417686	0.551517708	0.238557044
967	975	YDR089W	chrIV	+	TATA-less	TAF1-enriched	488	NA	621991	NA	YDR089W	484.4	NULL	0.006143194	0.184897599	0.484695003	0.035410671	0.250535974	0.03605437	0.177330783	0.673955067
968	976	YDR090C	chrIV	-	TATA-containing	TAF1-depleted	73	NA	626071	NA	YDR090C	436.7	NULL	0.007154342	1	1	0.415937626	0.007154342	1	0.854696042	0.301326595
969	977	YDR091C	chrIV	-	TATA-less	TAF1-enriched	3757	628545	628588	-43	YDR091C	1986.8	NULL	0.006240605	0.087495838	0.112351198	0.112351198	0.006338844	0.03605437	0.015172523	0.036701192
970	978	orphan	chrIV	-	TATA-less	TAF1-enriched	0	628837	628897	-60	orphan	11.1	NULL	0.933333333	0.733646789	0.793389781	0.266666667	1	0.266666667	1	1
971	979	CUT503	chrIV	-	TATA-less	TAF1-enriched	200	630512	630566	-54	CUT503	137	NULL	0.020939966	0.008021847	0.047417494	0.047417494	0.007910597	0.787615767	0.387337939	0.047417494
972	980	YDR093W	chrIV	+	TATA-less	TAF1-enriched	138	631048	631016	-32	YDR093W	145.3	NULL	0.296517172	0.776342228	0.015975041	0.136037128	0.003061939	0.263552477	0.024744672	0.802587349
973	981	YDR095C	chrIV	-	TATA-less	TAF1-enriched	18	636433	636573	-140	YDR095C	15.4	NULL	0.267926383	0.798215076	1	0.693529129	0.040474552	0.792147392	0.670037641	0.357835467
974	982	YDR097C	chrIV	-	TATA-less	TAF1-enriched	937	643887	643894	-7	YDR097C	321.1	NULL	0.005393812	0.006143194	0.1622505	1	0.062430421	0.036701192	0.046742883	0.06635304
975	983	YDR098C	chrIV	-	TATA-less	TAF1-enriched	2959	644955	644979	-24	YDR098C	2192.1	NULL	0.006740038	0.730907977	0.046044853	0.132006336	0.007581651	0.351857931	0.096790993	0.045361665
976	984	orphan	chrIV	+	TATA-containing	TAF1-enriched	10418	652720	652681	-39	orphan	2622.8	NULL	0.007049543	0.006842389	0.041979528	0.484695003	0.007154342	0.042651237	0.478273056	0.042651237
977	985	YDR100W	chrIV	+	TATA-less	TAF1-enriched	617	655026	654987	-39	YDR100W	1632.3	NULL	0.052718513	0.006945558	0.889235607	0.125525756	0.537638448	0.676082741	0.07198232	0.303193256
978	986	YDR101C	chrIV	-	TATA-less	TAF1-enriched	10119	657431	657494	-63	YDR101C	3237.2	NULL	0.003261123	0.003261123	0.015494295	0.015494295	0.002685983	0.015975041	0.003061939	0.015975041
979	987	orphan	chrIV	+	TATA-less	TAF1-enriched	72	657791	657761	-30	orphan	40.3	NULL	0.733196121	0.670582894	0.792771379	1	0.267926383	0.895810367	0.670582894	0.088675943
980	988	YDR103W	chrIV	+	TATA-less	TAF1-enriched	300	658346	658330	-16	YDR103W	324.3	NULL	0.059003394	0.008246738	1	0.692632784	0.492330692	1	0.548699	0.594729336
981	989	YDR104C	chrIV	-	TATA-less	TAF1-enriched	74	664905	664959	-54	YDR104C	176.9	NULL	0.086067568	0.007910597	0.508708087	0.234230702	0.071997747	0.787615767	0.603988754	0.354866599
982	990	orphan	chrIV	-	TATA-less	TAF1-enriched	140	675600	675658	-58	orphan	109	NULL	0.04838244	0.007800146	0.893187858	0.506054349	0.058551119	0.046044853	0.434054338	0.083811901
983	991	YDR110W	chrIV	+	TATA-less	TAF1-enriched	353	676077	676055	-22	YDR110W	474.7	NULL	0.30562919	0.144554389	0.048798093	0.506054349	0.008133895	0.790241066	0.267082584	0.048798093
984	992	YDR111C	chrIV	-	TATA-less	TAF1-depleted	1319	679947	679956	-9	YDR111C	614.5	NULL	0.148125677	0.008360374	0.359305232	0.508708087	0.306482234	0.293325574	0.230364065	0.359305232
985	993	YDR113C	chrIV	-	TATA-less	TAF1-enriched	82	681661	681702	-41	YDR113C	122.9	NULL	0.394107149	1	0.359305232	0.088675943	0.670582894	0.114961001	0.048783581	0.895810367
986	994	YDR115W	chrIV	+	TATA-less	TAF1-enriched	1249	682190	682155	-35	YDR115W	2412.9	NULL	0.217300922	0.015051346	0.033368235	0.015975041	0.007455462	0.015494295	0.014305878	0.033368235
987	995	YDR116C	chrIV	-	TATA-less	TAF1-enriched	418	683551	683602	-51	YDR116C	175.5	NULL	0.022342981	0.017913184	0.148263844	0.076415596	0.716367317	0.518605016	1	0.767755389
988	996	YDR117C	chrIV	-	TATA-less	TAF1-enriched	661	685633	685689	-56	YDR117C	930.8	NULL	0.007581651	0.007473611	0.044680647	0.107123399	0.02331564	0.480085003	0.131471079	0.480085003
989	997	YDR118W	chrIV	+	TATA-less	TAF1-enriched	123	685895	685855	-40	YDR118W	134.2	NULL	0.586516917	0.006338844	0.556298461	0.556298461	0.924556048	0.210044337	0.017219911	0.329609605
990	998	CUT504	chrIV	-	TATA-less	TAF1-depleted	51	687834	687860	-26	CUT504	23.7	NULL	0.668938973	0.387337939	0.184897599	0.894194334	0.863951761	0.145981945	0.439858381	0.2811981
991	999	YDR119W	chrIV	+	TATA-less	TAF1-enriched	553	688203	688142	-61	YDR119W	3798.9	NULL	0.666143638	0.006537796	0.06013513	0.139679141	0.014036221	0.044680647	0.036973144	0.06013513
992	1000	CUT505	chrIV	-	TATA-less	TAF1-enriched	6	690336	690360	-24	CUT505	24.9	NULL	0.147413673	0.153535354	0.266666667	0.044444444	0.933333333	0.4	0.170447443	0.357835467
993	1001	YDR120C	chrIV	-	TATA-less	TAF1-enriched	152	693212	693233	-21	YDR120C	845.8	NULL	0.006240605	0.006240605	1	0.278075687	0.193930852	0.042651237	0.077099872	0.041979528
994	1002	YDR121W	chrIV	+	TATA-less	TAF1-depleted	1297	693477	693465	-12	YDR121W	816.4	NULL	0.125786425	0.001733589	0.004915802	0.005188608	0.010355673	0.005188608	NaN	0.005188608
995	1003	YDR123C	chrIV	-	TATA-less	TAF1-enriched	669	699333	699420	-87	YDR123C	271.8	NULL	0.007154342	0.007259955	0.075059873	0.042651237	0.336347008	0.587593848	0.379453432	0.684195574
996	1004	orphan	chrIV	+	TATA-less	TAF1-enriched	106	700018	699969	-49	orphan	178.7	NULL	0.201939802	0.019594216	0.694417686	0.512610438	0.731830274	0.359305232	0.306482234	0.895810367
997	1005	YDR126W	chrIV	+	TATA-containing	TAF1-enriched	335	703264	703228	-36	YDR126W	106.5	NULL	0.394938074	0.125706788	0.4	0.432023291	0.682828283	0.4	1	0.793389781
998	1006	CUT507	chrIV	-	TATA-containing	TAF1-enriched	243	703919	704041	-122	CUT507	119.9	NULL	0.56969697	0.004040404	0.088888889	0.711111111	0.048484848	0.888888889	1	0.266666667
999	1007	YDR127W	chrIV	+	TATA-less	TAF1-enriched	808	704445	704403	-42	YDR127W	737.5	NULL	1	1	0.511319908	0.048798093	0.073517488	0.048106828	0.930987447	0.18763233
1000	1008	YDR128W	chrIV	+	TATA-less	TAF1-enriched	171	709694	709505	-189	YDR128W	106.9	NULL	0.153535354	0.033441628	0.177777778	0.4	0.015500277	0.359305232	0.214141414	0.359305232
1001	1009	YDR129C	chrIV	-	TATA-less	TAF1-enriched	4105	715374	715422	-48	YDR129C	2959.4	NULL	0.005855932	0.00576184	0.034132951	0.177015983	0.005855932	0.177015983	0.766230334	0.033499083
1002	1010	YDR130C	chrIV	-	TATA-less	TAF1-depleted	109	716625	716650	-25	YDR130C	271.9	NULL	0.682828283	0.194740405	0.793389781	0.793389781	0.153535354	0.693529129	0.495394415	0.793389781
1003	1011	orphan	chrIV	+	TATA-less	TAF1-enriched	1	717067	716902	-165	orphan	3.9	NULL	0.105192505	0.120869702	0.231592192	0.101471247	0.434688606	0.369611877	0.921056394	0.297313169
1004	1012	YDR131C	chrIV	-	TATA-less	TAF1-enriched	272	NA	718515	NA	YDR131C	51	NULL	0.026179124	0.193119366	0.237122014	1	0.021396137	0.507386527	0.663276399	0.087703529
1005	1013	YDR132C	chrIV	-	TATA-less	TAF1-enriched	101	720395	720422	-27	YDR132C	234.5	NULL	0.931359902	0.1627659	0.172327006	0.081865671	0.662108674	0.1014806	0.259368239	0.274915837
1006	1014	YDR134C	chrIV	-	TATA-containing	TAF1-depleted	24391	721455	721533	-78	YDR134C	16705.3	NULL	0.050186187	NaN	NaN	NaN	NaN	NaN	NaN	NaN
1007	1015	YDR135C	chrIV	-	TATA-containing	TAF1-enriched	250	727579	727606	-27	YDR135C	3310.6	NULL	0.132941731	0.007800146	0.143471009	0.110492024	0.044802434	0.143471009	0.012335776	0.14472819
1008	1016	CUT069	chrIV	+	TATA-containing	TAF1-enriched	17	727854	727852	-2	CUT069	5.9	NULL	0.933333333	0.609758799	0.4	0.116073943	0.048484848	0.533333333	0.733646789	0.044444444
1009	1017	YDR137W	chrIV	+	TATA-less	TAF1-enriched	133	728214	728159	-55	YDR137W	353.6	NULL	0.071997747	0.071491579	1	0.503357576	0.593777998	0.080892654	0.047182916	0.49783023
1010	1018	YDR138W	chrIV	+	TATA-less	TAF1-enriched	485	730609	730574	-35	YDR138W	141.9	NULL	0.128902119	0.006240605	0.872382973	0.050399283	0.151869315	0.050399283	0.013503763	0.872382973
1011	1019	YDR140W	chrIV	+	TATA-containing	TAF1-enriched	135	734175	734133	-42	YDR140W	410.6	NULL	0.93148272	0.008246738	0.048106828	0.424874689	0.012812142	0.231310785	0.048783581	0.048106828
1012	1020	YDR141C	chrIV	-	TATA-less	TAF1-enriched	4320	739995	740039	-44	YDR141C	641.5	NULL	0.791651777	0.005950856	0.03605437	0.768624792	0.006240605	0.301326595	0.924226868	0.050399283
1013	1021	YDR142C	chrIV	-	TATA-less	TAF1-depleted	62	741732	741750	-18	YDR142C	492.2	NULL	0.197959327	0.021167585	0.894523556	0.232774339	0.931847255	0.048798093	0.195548026	0.692632784
1014	1022	YDR143C	chrIV	-	TATA-less	TAF1-depleted	234	743950	744006	-56	YDR143C	128.1	NULL	0.049185351	0.008246738	0.087703529	0.792147392	0.012812142	0.048106828	0.441484761	0.065086726
1015	1023	YDR144C	chrIV	-	TATA-less	TAF1-depleted	281	746196	746263	-67	YDR144C	1393.8	NULL	1	0.151869315	0.802587349	0.136037128	0.026214243	0.015975041	0.147320903	0.802587349
1016	1024	YDR145W	chrIV	+	TATA-less	TAF1-enriched	468	746717	746672	-45	YDR145W	1124.3	NULL	0.060362915	0.026445101	0.048798093	0.288844366	0.007910597	0.048798093	0.196353718	0.048798093
1017	1025	YDR146C	chrIV	-	TATA-less	TAF1-enriched	144	750887	750907	-20	YDR146C	709.7	NULL	0.548699	0.60913007	1	0.694417686	1	0.694417686	0.548699	1
1018	1026	CUT508	chrIV	-	TATA-less	TAF1-enriched	0	751250	751323	-73	CUT508	44.4	NULL	0.441484761	0.438217981	0.047417494	0.892500695	0.007910597	0.787615767	0.794646803	0.047417494
1019	1027	YDR147W	chrIV	+	TATA-less	TAF1-enriched	388	751598	751562	-36	YDR147W	287.7	NULL	0.048783581	0.010030543	0.048798093	0.065915952	0.007910597	0.049491231	0.303052329	0.59928633
1020	1028	YDR148C	chrIV	-	TATA-less	TAF1-enriched	2164	755070	755130	-60	YDR148C	1249.9	NULL	1	0.664432119	0.417455426	0.342584628	0.298697556	0.888854163	0.929700693	0.14472819
1021	1029	orphan	chrIV	-	TATA-less	TAF1-enriched	645	755070	755309	-239	orphan	538.5	NULL	0.013460069	0.332739927	0.895810367	0.895172885	0.232842047	0.595883091	1	0.049491231
1022	1030	YDR151C	chrIV	-	TATA-less	TAF1-enriched	469	765274	765319	-45	YDR151C	1039.1	NULL	0.012335776	0.007800146	1	0.496419628	1	0.506054349	0.254102498	0.590013887
1023	1031	YDR152W	chrIV	+	TATA-less	TAF1-enriched	1056	765703	765677	-26	YDR152W	1101.3	NULL	0.542899463	0.007690497	0.356355957	1	0.145986278	0.895172885	0.223654208	0.047417494
1024	1032	YDR153C	chrIV	-	TATA-less	TAF1-depleted	2169	767905	768104	-199	YDR153C	226.2	NULL	0.199557256	0.487629882	0.288844366	0.111611768	0.66557604	0.288844366	0.377660987	0.68989587
1025	1033	YDR155C	chrIV	-	TATA-containing	TAF1-depleted	93200	768917	769037	-120	YDR155C	12319.1	NULL	0.731830274	0.169686101	0.047417494	0.105997548	0.145986278	1	0.659736375	0.046730149
1026	1034	YDR156W	chrIV	+	TATA-less	TAF1-enriched	3917	769540	769485	-55	YDR156W	2268.5	NULL	0.091218926	0.068723327	0.065390823	0.035410671	0.929029726	0.03605437	0.006143194	0.065390823
1027	1035	YDR157W	chrIV	+	TATA-less	TAF1-enriched	418	769953	769919	-34	YDR157W	42.1	NULL	0.282828283	0.609758799	0.711111111	0.888888889	0.460606061	0.044444444	0.808080808	0.177777778
1028	1036	YDR158W	chrIV	+	TATA-less	TAF1-depleted	845	770344	770322	-22	YDR158W	2730.7	NULL	0.006842389	0.521551992	0.780595556	0.193930852	0.652946182	0.040643643	0.652946182	0.039979603
1029	1037	YDR159W	chrIV	+	TATA-less	TAF1-enriched	153	772026	771935	-91	YDR159W	334	NULL	0.007910597	0.038015068	0.353367292	0.894523556	0.016065427	0.084784996	0.930735748	0.588809187
1030	1038	YDR160W	chrIV	+	TATA-less	TAF1-enriched	433	NA	776034	NA	YDR160W	181.2	NULL	0.393272891	0.047582097	0.512610438	0.512610438	0.864190848	0.512610438	0.796096689	0.430614455
1031	1039	YDR161W	chrIV	+	TATA-less	TAF1-enriched	149	779042	779014	-28	YDR161W	2353.3	NULL	0.098026461	1	0.68122512	0.784191229	0.334550428	0.040643643	0.024834346	0.295641821
1032	1040	YDR162C	chrIV	-	TATA-less	TAF1-depleted	675	781188	781230	-42	YDR162C	145.4	NULL	0.214141414	0.933333333	0.533333333	1	0.349393711	0.044444444	0.733646789	0.888888889
1033	1041	YDR163W	chrIV	+	TATA-less	TAF1-enriched	3119	781428	781359	-69	YDR163W	269.4	NULL	1	0.433210667	1	0.048798093	0.025386719	0.048798093	0.433210667	0.507386527
1034	1042	YDR164C	chrIV	-	TATA-less	TAF1-enriched	454	784216	784267	-51	YDR164C	818.4	NULL	0.542158797	0.007366379	0.042651237	0.303193256	0.006338844	0.303193256	0.476985711	0.892845929
1035	1043	CUT513	chrIV	-	TATA-less	TAF1-enriched	69	784599	784663	-64	CUT513	15.5	NULL	0.798561763	0.172722365	0.088675943	0.238557044	0.266236144	0.1484791	1	0.14972246
1036	1044	YDR165W	chrIV	+	TATA-less	TAF1-depleted	357	784884	784840	-44	YDR165W	867.8	NULL	0.031901272	0.006740038	0.046044853	0.046044853	0.540666674	0.046044853	0.020262769	0.045361665
1037	1045	YDR167W	chrIV	+	TATA-less	TAF1-enriched	930	789646	789542	-104	YDR167W	2405.2	NULL	0.003329187	0.007455462	0.136037128	0.348501424	0.003329187	0.033368235	0.595883091	0.015975041
1038	1046	YDR168W	chrIV	+	TATA-less	TAF1-enriched	261	790327	790288	-39	YDR168W	2633.4	NULL	1	0.017219911	0.512610438	0.507386527	0.106024499	0.235679913	0.493869431	0.14972246
1039	1047	YDR169C	chrIV	-	TATA-less	TAF1-enriched	190	794212	794255	-43	YDR169C	386	NULL	0.047182916	0.008133895	0.348808623	0.894523556	0.012812142	0.507386527	0.007154342	0.048106828
1040	1048	CUT071	chrIV	+	TATA-less	TAF1-enriched	150	794507	794482	-25	CUT071	29	NULL	0.225345694	0.261101437	0.04332537	0.345717816	0.037077191	0.686130413	0.341654836	0.686130413
1041	1049	YDR170C	chrIV	-	TATA-less	TAF1-depleted	651	802191	802418	-227	YDR170C	460.5	NULL	0.050394337	0.348546687	0.14972246	0.049491231	0.443898466	0.049491231	0.495394415	0.049491231
1042	1050	tQ(UUG)D3	chrIV	+	TATA-less	-	12	802653	802597	-56	tQ(UUG)D3	20.4	NULL	0.106024499	0.021625614	0.359305232	1	0.349393711	0.694417686	0.932206034	0.895810367
1043	1051	orphan	chrIV	-	TATA-less	TAF1-enriched	3805	806007	806206	-199	orphan	108.1	NULL	0.304773202	0.607373826	0.692632784	0.791517735	0.550114935	0.506054349	0.012652434	0.047417494
1044	1052	YDR171W	chrIV	+	TATA-containing	TAF1-depleted	12479	806674	806560	-114	YDR171W	1466.5	NULL	0.296048012	0.016594238	0.047417494	0.787615767	0.007910597	0.063431425	0.044802434	0.046730149
1045	1053	YDR172W	chrIV	+	TATA-less	TAF1-enriched	92105	808318	808271	-47	YDR172W	5640.6	NULL	0.007154342	0.864190848	0.048798093	0.693529129	0.008021847	0.087703529	0.069974467	0.048798093
1046	1054	YDR173C	chrIV	-	TATA-less	TAF1-enriched	75	811644	811675	-31	YDR173C	1438.9	NULL	0.001556573	0.001556573	0.004915802	0.080118314	0.001556573	0.005188608	0.001733589	0.005188608
1047	1055	YDR174W	chrIV	+	TATA-less	TAF1-enriched	20288	812135	812085	-50	YDR174W	1358.4	NULL	0.008246738	0.550817954	1	0.28733307	0.031901272	0.693529129	0.259368239	0.1484791
1048	1056	orphan	chrIV	-	TATA-less	TAF1-enriched	1	812289	812323	-34	orphan	4.5	NULL	0.201939802	0.346843113	0.895810367	0.512610438	0.551517708	0.512610438	0.268767553	0.512610438
1049	1057	YDR175C	chrIV	-	TATA-less	TAF1-enriched	287	814159	814199	-40	YDR175C	458.5	NULL	0.049587742	0.667270232	0.083811901	1	0.008021847	0.064258531	0.794646803	0.083811901
1050	1058	YDR176W	chrIV	+	TATA-less	TAF1-enriched	40	NA	814458	NA	YDR176W	267.5	NULL	1	0.549408625	0.088675943	0.238557044	0.551517708	0.691728538	0.266236144	0.049491231
1051	1059	YDR177W	chrIV	+	TATA-less	TAF1-enriched	366	816984	816789	-195	YDR177W	1924.4	NULL	0.864665265	0.008246738	1	0.59928633	0.201147528	0.238557044	0.040474552	0.065915952
1052	1060	YDR178W	chrIV	+	TATA-containing	TAF1-enriched	2773	817864	817848	-16	YDR178W	1392.5	NULL	0.798215076	0.048783581	0.694417686	0.894849724	0.551517708	0.238557044	0.932206034	0.508708087
1053	1061	YDR180W	chrIV	+	TATA-less	TAF1-enriched	30	821187	821158	-29	YDR180W	125.2	NULL	0.261101437	0.143836769	0.68989587	0.415937626	0.261101437	0.231310785	0.66557604	0.351857931
1054	1062	YDR184C	chrIV	-	TATA-less	TAF1-enriched	216	831510	831542	-32	YDR184C	1115.4	NULL	0.025386719	0.007690497	0.046730149	0.208468351	0.014577797	0.208468351	1	0.080892654
1055	1063	ST0592	chrIV	+	TATA-less	TAF1-enriched	50	832026	831853	-173	ST0592	65.3	NULL	0.56969697	0.109090909	1	0.888888889	0.933333333	0.14972246	0.394938074	0.044444444
1056	1064	YDR185C	chrIV	-	TATA-less	TAF1-enriched	1064	832369	832505	-136	YDR185C	590.5	NULL	0.343397338	0.007910597	0.894849724	0.063431425	0.791651777	0.047417494	0.790104282	1
1057	1065	YDR186C	chrIV	-	TATA-less	TAF1-enriched	3014	835480	835546	-66	YDR186C	469.8	NULL	0.443898466	0.551517708	1	0.14972246	0.349393711	1	0.798561763	0.14972246
1058	1066	orphan	chrIV	-	TATA-less	TAF1-depleted	788	835680	835684	-4	orphan	348.8	NULL	0.931726391	0.522396205	1	0.080892654	0.197959327	0.28274546	0.135870597	0.110492024
1059	1067	orphan	chrIV	-	TATA-less	TAF1-enriched	6	836224	836290	-66	orphan	0.6	NULL	0.72367361	0.026518722	0.235679913	NA	0.583882421	0.085152369	NA	1
1060	1068	YDR188W	chrIV	+	TATA-less	TAF1-enriched	885	836412	836373	-39	YDR188W	1291.4	NULL	0.102955624	0.667829275	0.232774339	0.690816272	0.021396137	0.357835467	0.390749904	0.353367292
1061	1069	YDR189W	chrIV	+	TATA-less	TAF1-enriched	5642	838398	838363	-35	YDR189W	1593.6	NULL	0.007259955	0.006338844	0.042651237	0.779854618	0.728559975	0.042651237	0.297569609	1
1062	1070	YDR190C	chrIV	-	TATA-less	TAF1-enriched	265	841988	842041	-53	YDR190C	4196.2	NULL	0.388196138	0.007154342	0.228361945	0.49356279	1	0.1014806	0.069511238	0.203693596
1063	1071	YDR191W	chrIV	+	TATA-less	TAF1-enriched	524	842340	842312	-28	YDR191W	138.5	NULL	0.733646789	0.608498302	0.888888889	0.294801992	0.033441628	0.888888889	0.394938074	0.044444444
1064	1072	YDR192C	chrIV	-	TATA-less	TAF1-enriched	415	844882	844934	-52	YDR192C	313.8	NULL	0.005393812	0.02741654	0.03605437	0.141326003	0.046742883	0.210044337	0.026546198	0.141326003
1065	1073	YDR194C	chrIV	-	TATA-containing	TAF1-enriched	197	847928	847969	-41	YDR194C	1158.7	NULL	0.006240605	1	1	0.283876475	0.005950856	0.283876475	0.12002519	0.03605437
1066	1074	YDR195W	chrIV	+	TATA-containing	TAF1-enriched	446	848376	848360	-16	YDR195W	466	NULL	0.104184357	0.016161616	0.044444444	0.600401848	0.008360374	0.359305232	0.172722365	0.049491231
1067	1075	YDR196C	chrIV	-	TATA-less	TAF1-depleted	682	850980	850999	-19	YDR196C	714	NULL	0.349393711	0.125042727	0.293325574	0.049491231	0.608498302	0.048798093	1	0.049491231
1068	1076	YDR197W	chrIV	+	TATA-less	TAF1-enriched	405	851249	851227	-22	YDR197W	624.6	NULL	0.015172523	0.516391788	0.03605437	0.283876475	0.005393812	0.03605437	0.776814004	0.03605437
1069	1077	YDR198C	chrIV	-	TATA-less	TAF1-enriched	69	NA	853988	NA	YDR198C	223	NULL	0.218303401	0.147320903	0.45605654	0.136037128	0.686075935	0.015975041	0.015051346	1
1070	1078	YDR200C	chrIV	-	TATA-less	TAF1-enriched	4529	856111	856158	-47	YDR200C	744	NULL	0.027980503	0.155478268	0.148263844	0.872382973	0.317734327	0.027362545	0.613395531	0.576150122
1071	1079	YDR205W	chrIV	+	TATA-less	TAF1-enriched	3011	859363	859345	-18	YDR205W	1109.8	NULL	0.102340692	0.007910597	0.506054349	0.135857322	0.045593068	0.684195574	0.185728553	0.692632784
1072	1080	YDR206W	chrIV	+	TATA-less	TAF1-enriched	110	NA	861763	NA	YDR206W	495.6	NULL	0.026711985	0.007259955	0.686130413	0.049491231	0.525729278	0.049491231	0.931604881	1
1073	1081	YDR207C	chrIV	-	TATA-less	TAF1-enriched	560	867535	867591	-56	YDR207C	431.4	NULL	0.217300922	0.635869658	0.02677094	0.178744044	0.004133256	0.178744044	1	0.02677094
1074	1082	YDR208W	chrIV	+	TATA-less	TAF1-enriched	3215	868295	868132	-163	YDR208W	2194.5	NULL	0.006326683	0.761783543	0.576150122	0.872382973	0.761783543	0.576150122	0.393035392	0.576150122
1075	1083	YDR210W	chrIV	+	TATA-containing	TAF1-enriched	4165	871059	871042	-17	YDR210W	3741.6	NULL	0.796096689	0.007366379	0.046044853	0.587593848	0.2645353	0.587593848	0.110933328	0.045361665
1076	1084	YDR211W	chrIV	+	TATA-containing	TAF1-depleted	211	884751	884685	-66	YDR211W	1850.5	NULL	0.224501127	0.007259955	1	0.657788651	0.165086234	0.657788651	0.478273056	0.484695003
1077	1085	YDR212W	chrIV	+	TATA-less	TAF1-enriched	4308	887220	887164	-56	YDR212W	2211.2	NULL	0.190673275	0.016387834	0.039979603	0.09467072	0.663276399	0.039979603	0.029482772	0.295641821
1078	1086	CUT515	chrIV	-	TATA-less	TAF1-enriched	1745	892390	892429	-39	CUT515	84.6	NULL	0.026445101	0.017010283	0.894194334	0.594729336	0.145986278	0.693529129	0.1423982	0.291840545
1079	1087	YDR214W	chrIV	+	TATA-less	TAF1-depleted	225	892948	892759	-189	YDR214W	2597.3	NULL	0.793538864	0.007259955	0.342584628	1	0.542899463	0.125525756	0.362760723	0.342584628
1080	1088	YDR219C	chrIV	-	TATA-less	TAF1-enriched	269	NA	907062	NA	YDR219C	225.2	NULL	0.007690497	0.436563363	0.045361665	0.046044853	0.006740038	0.046044853	1	0.045361665
1081	1089	YDR221W	chrIV	+	TATA-less	TAF1-enriched	299	907502	907335	-167	YDR221W	798.4	NULL	0.045197383	0.191490579	0.039979603	0.295641821	0.015775183	0.295641821	0.924719037	0.671784971
1082	1090	ST4285	chrIV	-	TATA-less	TAF1-enriched	216	909223	909375	-152	ST4285	123.3	NULL	0.248735631	0.014760323	0.044680647	0.688030163	0.537638448	0.412866955	0.521551992	0.412866955
1083	1091	YDR222W	chrIV	+	TATA-containing	TAF1-enriched	2775	910042	910014	-28	YDR222W	1018.6	NULL	0.931604881	0.007690497	0.231310785	0.342584628	0.030684702	0.590013887	0.928339172	0.046044853
1084	1092	YDR224C	chrIV	-	TATA-containing	TAF1-depleted	88252	914665	914746	-81	YDR224C	6500.4	NULL	1	0.443898466	0.145981945	0.512610438	0.025914063	0.359305232	0.267926383	0.234230702
1085	1093	CUT073	chrIV	+	TATA-less	TAF1-enriched	536	915270	915230	-40	CUT073	15.3	NULL	0.214141414	0.147413673	0.888888889	0.711111111	0.864900617	1	0.460606061	0.533333333
1086	1094	YDR225W	chrIV	+	TATA-containing	TAF1-depleted	1598	915439	915432	-7	YDR225W	21883.4	NULL	0.004614763	0.360765351	0.576150122	0.576150122	0.104371295	0.576150122	0.360765351	0.178744044
1087	1095	orphan	chrIV	+	TATA-less	TAF1-depleted	98	916125	915931	-194	orphan	153.7	NULL	1	0.551517708	0.694417686	0.694417686	0.864665265	0.359305232	0.106024499	0.049491231
1088	1096	YDR226W	chrIV	+	TATA-containing	TAF1-depleted	5157	916480	916451	-29	YDR226W	6548.3	NULL	0.001556573	0.001688186	0.005188608	NaN	0.001643552	0.004915802	0.049238968	0.005188608
1089	1097	YDR227W	chrIV	+	TATA-less	TAF1-enriched	121	917481	917463	-18	YDR227W	61.3	NULL	0.668938973	0.931847255	0.432023291	0.177777778	0.798215076	0.088888889	0.232842047	0.357835467
1090	1098	YDR228C	chrIV	-	TATA-less	TAF1-depleted	93	923725	923850	-125	YDR228C	169.7	NULL	0.028282828	0.443898466	0.266666667	1	0.367676768	0.895493084	0.550817954	1
1091	1099	orphan	chrIV	+	TATA-less	TAF1-enriched	7	924320	924170	-150	orphan	20.7	NULL	0.56969697	0.050394337	0.266666667	0.888888889	0.153535354	1	0.56969697	1
1092	1100	ST4290	chrIV	-	TATA-containing	TAF1-enriched	128	924461	924524	-63	ST4290	161	NULL	0.007800146	0.007910597	0.788281321	0.424874689	0.101109741	0.104870291	0.221953283	0.688030163
1093	1101	orphan	chrIV	+	TATA-containing	TAF1-enriched	253	926708	926524	-184	orphan	62.9	NULL	0.386476231	0.791651777	0.210044337	1	0.251431859	0.779854618	0.100493741	0.659023837
1094	1102	YDR231C	chrIV	-	TATA-less	TAF1-enriched	1445	926894	926935	-41	YDR231C	458.7	NULL	0.193930852	0.668385514	0.048798093	0.18763233	0.013460069	0.048798093	0.797164177	0.048106828
1095	1103	YDR232W	chrIV	+	TATA-less	TAF1-enriched	37705	927243	927201	-42	YDR232W	1456.5	NULL	1	0.586516917	0.691728538	0.184897599	1	0.590013887	0.785246408	0.046730149
1096	1104	YDR233C	chrIV	-	TATA-containing	TAF1-enriched	13286	930304	930369	-65	YDR233C	5198.5	NULL	0.267082584	0.033131861	0.048106828	1	0.008246738	0.511319908	0.021167585	0.048106828
1097	1105	orphan	chrIV	+	TATA-less	TAF1-enriched	288	930670	930510	-160	orphan	87.2	NULL	0.019594216	0.024084965	0.417455426	0.042651237	1	0.138408493	0.524071423	0.786943898
1098	1106	YDR234W	chrIV	+	TATA-containing	TAF1-depleted	780	931178	931021	-157	YDR234W	619.9	NULL	0.443097314	0.026979768	0.294801992	0.044444444	0.864428679	0.049491231	0.08830911	0.044444444
1099	1107	YDR235W	chrIV	+	TATA-less	TAF1-depleted	324	933523	933493	-30	YDR235W	624.6	NULL	1	0.930094253	0.301326595	0.67502412	1	1	1	1
1100	1108	YDR236C	chrIV	-	TATA-less	TAF1-enriched	355	935919	935917	2	YDR236C	672.3	NULL	0.025649925	0.007800146	0.484695003	0.046730149	0.118361567	0.084784996	0.012972764	0.484695003
1101	1109	YDR237W	chrIV	+	TATA-less	TAF1-enriched	118	NA	936473	NA	YDR237W	510	NULL	0.201147528	0.232018345	0.048798093	0.1484791	0.201147528	0.048106828	0.040120865	0.048106828
1102	1110	YDR238C	chrIV	-	TATA-less	TAF1-enriched	1940	940803	940870	-67	YDR238C	2664.2	NULL	0.017219911	0.007049543	0.124220661	0.887288003	0.032993937	0.299445905	0.505554817	0.124220661
1103	1111	YDR239C	chrIV	-	TATA-less	TAF1-enriched	143	943409	943432	-23	YDR239C	406.1	NULL	0.004866885	0.035577182	0.027362545	1	0.017913184	0.629879079	0.543329872	0.027362545
1104	1112	YDR244W	chrIV	+	TATA-containing	TAF1-enriched	3375	950571	950538	-33	YDR244W	389.7	NULL	0.007800146	0.007800146	0.113846298	0.894523556	0.020939966	0.087703529	0.072504128	0.147232255
1105	1113	YDR245W	chrIV	+	TATA-less	TAF1-enriched	624	952907	952779	-128	YDR245W	948.3	NULL	0.549408625	0.008246738	0.692632784	0.18763233	0.54363657	0.894523556	0.862242032	0.692632784
1106	1114	YDR246W	chrIV	+	TATA-less	TAF1-enriched	284	954313	954294	-19	YDR246W	1106.4	NULL	0.005919951	0.002685983	0.015975041	0.348501424	0.004326474	0.802587349	0.191694602	0.015494295
1107	1115	ANT129	chrIV	-	TATA-less	TAF1-enriched	10	954639	954687	-48	ANT129	78.2	NULL	0.733646789	0.668938973	1	0.600401848	0.808080808	0.177777778	0.153535354	0.4
1108	1116	YDR247W	chrIV	+	TATA-less	TAF1-depleted	916	955677	955667	-10	YDR247W	196.3	NULL	0.441484761	0.145986278	0.790882323	0.063431425	0.296048012	0.691728538	0.797516299	0.234230702
1109	1117	YDR248C	chrIV	-	TATA-containing	TAF1-enriched	425	958385	958404	-19	YDR248C	1418	NULL	0.607225552	0.443898466	0.694417686	0.600401848	0.545100219	0.359305232	0.071997747	0.294801992
1110	1118	YDR249C	chrIV	-	TATA-less	TAF1-enriched	118	959795	959888	-93	YDR249C	171.4	NULL	0.864900617	0.016161616	0.600401848	0.693529129	0.864900617	0.190345809	0.797516299	0.511319908
1111	1119	orphan	chrIV	-	TATA-less	TAF1-enriched	69	959937	959971	-34	orphan	139.2	NULL	0.307332348	0.004040404	0.432023291	0.432023291	0.282828283	0.533333333	0.367676768	0.600401848
1112	1120	YDR251W	chrIV	+	TATA-less	TAF1-enriched	3901	960346	960324	-22	YDR251W	458.3	NULL	0.481156643	0.058941833	0.133293185	1	0.028296117	0.295641821	0.774424766	0.076031041
1113	1121	YDR252W	chrIV	+	TATA-less	TAF1-enriched	138	963441	963404	-37	YDR252W	343.2	NULL	0.005855932	0.011796661	0.375651673	1	0.017010283	0.888854163	0.929300411	0.375651673
1114	1122	YDR253C	chrIV	-	TATA-less	TAF1-enriched	6	964930	964973	-43	YDR253C	5.6	NULL	0.217200496	0.155433345	0.168806954	0.653720012	0.774812202	0.767810014	0.849428909	0.767810014
1115	1123	YDR254W	chrIV	+	TATA-less	TAF1-enriched	52	965094	965041	-53	YDR254W	52.8	NULL	0.032514852	0.146954165	0.111611768	0.354866599	0.007910597	0.177967426	0.861741578	0.046730149
1116	1124	YDR255C	chrIV	-	TATA-less	TAF1-enriched	530	967809	967867	-58	YDR255C	440.5	NULL	0.2645353	0.775867448	1	0.888854163	0.489211129	0.888854163	0.464757447	0.424874689
1117	1125	YDR257C	chrIV	-	TATA-less	TAF1-enriched	78	971421	971470	-49	YDR257C	698.9	NULL	0.796810213	0.007473611	0.143471009	0.084784996	0.437392462	0.084784996	0.203510603	0.279641534
1118	1126	YDR258C	chrIV	-	TATA-containing	TAF1-depleted	1251	974124	974272	-148	YDR258C	1166.5	NULL	0.393272891	0.729976105	0.359305232	0.085758003	0.343397338	0.14972246	0.550817954	0.595883091
1119	1127	CUT075	chrIV	+	TATA-less	TAF1-enriched	16	NA	974614	NA	CUT075	6.5	NULL	0.348546687	1	0.511319908	0.693529129	0.021396137	0.1484791	0.073517488	0.357835467
1120	1128	orphan	chrIV	+	TATA-less	TAF1-enriched	83	976518	976498	-20	orphan	21.7	NULL	0.797164177	0.930352983	0.232774339	0.417455426	0.863711407	0.424874689	1	1
1121	1129	ST0633	chrIV	+	TATA-less	TAF1-enriched	287	977052	976924	-128	ST0633	68.4	NULL	0.008246738	0.008246738	0.237122014	0.048798093	0.389902098	0.895493084	1	0.893526535
1122	1130	YDR260C	chrIV	-	TATA-less	TAF1-enriched	139	977212	977255	-43	YDR260C	760.7	NULL	0.427199637	0.091838902	0.288844366	0.894194334	0.227027795	0.790882323	0.163540852	0.143471009
1123	1131	YDR261C	chrIV	-	TATA-containing	TAF1-enriched	1523	NA	979222	NA	YDR261C	3011	NULL	0.102955624	0.007910597	0.351857931	0.046730149	1	0.046730149	0.007800146	0.351857931
1124	1132	orphan	chrIV	+	TATA-less	TAF1-enriched	29	NA	979577	NA	orphan	55	NULL	0.349393711	0.932206034	0.508708087	0.512610438	0.495394415	0.088675943	1	0.693529129
1125	1133	ST4309	chrIV	-	TATA-containing	TAF1-enriched	114	980817	980848	-31	ST4309	122	NULL	0.201939802	0.021625614	1	0.049491231	0.551517708	0.049491231	0.668938973	0.895810367
1126	1134	tG(GCC)D2	chrIV	+	TATA-less	-	453	992844	992821	-23	tG(GCC)D2	10.8	NULL	0.125042727	0.172722365	1	0.14972246	0.349393711	0.088675943	0.798561763	0.59928633
1127	1135	YDR262W	chrIV	+	TATA-containing	TAF1-depleted	1112	993176	993124	-52	YDR262W	1722.8	NULL	0.795737098	0.006842389	0.046730149	0.688030163	0.197959327	0.046044853	0.091838902	1
1128	1136	YDR264C	chrIV	-	TATA-less	TAF1-enriched	904	998363	998393	-30	YDR264C	2428.8	NULL	0.231192354	0.165086234	1	1	0.795012172	1	0.144554389	1
1129	1137	YDR265W	chrIV	+	TATA-less	TAF1-enriched	381	998691	998675	-16	YDR265W	167.4	NULL	0.007800146	0.193119366	1	0.046730149	0.929700693	0.14472819	0.485230567	0.110492024
1130	1138	YDR266C	chrIV	-	TATA-less	TAF1-depleted	203	1002172	1002239	-67	YDR266C	1282	NULL	0.007259955	0.026445101	0.234230702	0.14972246	0.103570182	0.049491231	0.232842047	0.138408493
1131	1139	YDR267C	chrIV	-	TATA-less	TAF1-enriched	384	1003652	1003696	-44	YDR267C	136.2	NULL	0.931726391	0.04838244	0.508708087	1	0.134408254	1	0.931847255	0.418961725
1132	1140	YDR268W	chrIV	+	TATA-less	TAF1-enriched	37	NA	1003728	NA	YDR268W	14.9	NULL	0.148125677	0.268767553	0.234230702	0.14972246	0.266236144	0.508708087	0.863951761	0.508708087
1133	1141	orphan	chrIV	+	TATA-less	TAF1-enriched	23	1005115	1005046	-69	orphan	13.9	NULL	0.933333333	0.933333333	0.600401848	0.4	0.282828283	0.711111111	1	0.266666667
1134	1142	CUT516	chrIV	-	TATA-less	TAF1-enriched	128	1005196	1005297	-101	CUT516	129.2	NULL	0.550114935	0.667829275	0.344156576	0.356355957	0.49463363	0.693529129	0.931847255	0.895493084
1135	1143	YDR270W	chrIV	+	TATA-less	TAF1-depleted	63	1005591	1005588	-3	YDR270W	146.1	NULL	0.013460069	0.007910597	0.049491231	0.691728538	0.008246738	0.049491231	0.071997747	0.049491231
1136	1144	YDR272W	chrIV	+	TATA-less	TAF1-enriched	941	1008985	1008953	-32	YDR272W	924.5	NULL	0.129595844	0.001688186	0.080118314	NaN	0.001556573	NaN	0.215924939	0.005188608
1137	1145	CUT517	chrIV	-	TATA-less	TAF1-depleted	176	1011437	1011496	-59	CUT517	76.8	NULL	0.074024444	0.808080808	0.432023291	0.177777778	0.041184163	0.294801992	0.367676768	0.044444444
1138	1146	orphan	chrIV	-	TATA-containing	TAF1-enriched	172	1013127	1013159	-32	orphan	41.8	NULL	0.214141414	0.016161616	0.177777778	0.044444444	0.932087071	0.711111111	0.367676768	0.4
1139	1147	orphan	chrIV	+	TATA-less	TAF1-enriched	5	1013838	1013712	-126	orphan	58.7	NULL	0.492330692	0.438217981	1	0.084784996	0.668385514	0.14972246	0.339899051	1
1140	1148	YDR276C	chrIV	-	TATA-containing	TAF1-depleted	27574	1013617	1013662	-45	YDR276C	27814.7	NULL	0.329076491	0.005855932	0.480085003	1	0.657313488	0.670683572	0.091218926	0.034132951
1141	1149	ST0641	chrIV	+	TATA-less	TAF1-enriched	198	1014333	1014326	-7	ST0641	67.2	NULL	0.124377909	0.008246738	0.357835467	0.048798093	0.232018345	0.048798093	0.082703863	0.083811901
1142	1150	YDR277C	chrIV	-	TATA-containing	TAF1-depleted	2192	1015708	1015832	-124	YDR277C	153.6	NULL	0.017913184	0.006029128	0.036777943	0.07723562	0.003329187	0.07723562	0.029404909	0.136037128
1143	1151	tE(CUC)D	chrIV	-	TATA-less	-	1425	1017262	1017290	-28	tE(CUC)D	183.5	NULL	0.860724086	0.928755908	0.132006336	0.583882421	0.150163594	0.583882421	0.854696042	0.132006336
1144	1152	CUT518	chrIV	-	TATA-less	TAF1-enriched	0	1020207	1020361	-154	CUT518	4.4	NULL	0.306482234	1	0.241317443	0.512610438	1	0.088675943	0.201939802	1
1145	1153	YDR280W	chrIV	+	TATA-less	TAF1-enriched	893	1020830	1020677	-153	YDR280W	674.6	NULL	0.093697659	0.006143194	0.03605437	0.554772097	0.006240605	0.256839258	1	0.03605437
1146	1154	YDR281C	chrIV	-	TATA-less	TAF1-enriched	459	1022209	1022352	-143	YDR281C	2234.4	NULL	0.007690497	0.007366379	1	0.88846875	0.796454389	0.88846875	0.061930587	0.2811981
1147	1155	orphan	chrIV	-	TATA-less	TAF1-enriched	2	1022704	1022738	-34	orphan	0.3	NULL	NA	NaN	NA	NA	NaN	NaN	NaN	NaN
1148	1156	YDR282C	chrIV	-	TATA-containing	TAF1-enriched	121	1024741	1024762	-21	YDR282C	166.1	NULL	0.798215076	0.060362915	0.048106828	0.357835467	0.087748841	0.087703529	0.392435278	0.357835467
1149	1157	CUT076	chrIV	+	TATA-less	TAF1-enriched	7	1030553	1030554	1	CUT076	70.2	NULL	0.032207629	0.550817954	0.232774339	1	0.008133895	1	0.931726391	0.894523556
1150	1158	YDR284C	chrIV	-	TATA-containing	TAF1-enriched	424	1031528	1031700	-172	YDR284C	5591.4	NULL	0.010661334	0.009938798	0.141326003	0.050399283	0.017507844	0.03605437	0.775389633	0.421881247
1151	1159	YDR288W	chrIV	+	TATA-less	TAF1-enriched	276	1037209	1037156	-53	YDR288W	739.2	NULL	0.008133895	0.104798141	0.357835467	0.690816272	0.026445101	0.083811901	0.606584521	0.692632784
1152	1160	YDR292C	chrIV	-	TATA-less	TAF1-enriched	45	NA	1045143	NA	YDR292C	481.8	NULL	0.013328329	0.09307828	0.03605437	0.125525756	0.183229817	0.210044337	1	0.050399283
1153	1161	YDR293C	chrIV	-	TATA-less	TAF1-enriched	1067	1049310	1049444	-134	YDR293C	109.7	NULL	0.214141414	0.026979768	0.4	0.044444444	0.367676768	0.888888889	0.153535354	1
1154	1162	orphan	chrIV	+	TATA-containing	TAF1-depleted	12	1050357	1050204	-153	orphan	100.7	NULL	0.039415782	0.007800146	0.507386527	0.786943898	0.259368239	0.232774339	0.731370313	0.89386201
1155	1163	YDR294C	chrIV	-	TATA-containing	TAF1-enriched	270	1052248	1052261	-13	YDR294C	536.8	NULL	0.104184357	0.668938973	0.049491231	0.084784996	0.008133895	0.234230702	0.669489674	0.048798093
1156	1164	YDR295C	chrIV	-	TATA-less	TAF1-depleted	87	NA	1054910	NA	YDR295C	991.5	NULL	0.003329187	0.006029128	0.015975041	0.263552477	0.694095468	0.023868442	0.263552477	0.015975041
1157	1165	YDR296W	chrIV	+	TATA-less	TAF1-enriched	875	1055208	1055159	-49	YDR296W	1360	NULL	0.091838902	0.006842389	0.046730149	0.417455426	0.007800146	0.080892654	0.182392986	0.06260547
1158	1166	orphan	chrIV	+	TATA-containing	TAF1-enriched	24	NA	1056052	NA	orphan	12.3	NULL	0.072727273	0.072727273	0.533333333	0.793389781	0.460606061	0.4	0.808080808	0.888888889
1159	1167	YDR297W	chrIV	+	TATA-containing	TAF1-depleted	1648	1056528	1056510	-18	YDR297W	2898.5	NULL	0.097408871	0.098026461	1	1	0.930481276	0.776814004	0.927191096	0.682224553
1160	1168	YDR298C	chrIV	-	TATA-less	TAF1-enriched	2244	1058923	1058971	-48	YDR298C	3280.1	NULL	0.001556573	0.001556573	0.004915802	NaN	0.001643552	0.004915802	NaN	NaN
1161	1169	YDR299W	chrIV	+	TATA-containing	TAF1-enriched	175	1059628	1059592	-36	YDR299W	305.1	NULL	0.031291196	0.039415782	0.047417494	0.145981945	0.008021847	0.234230702	0.548699	0.081865671
1162	1170	YDR300C	chrIV	-	TATA-less	TAF1-enriched	196	1062821	1062853	-32	YDR300C	3027.8	NULL	0.340778614	0.082703863	0.04332537	0.176565351	0.046784411	1	0.434894327	0.125525756
1163	1171	YDR301W	chrIV	+	TATA-less	TAF1-enriched	976	1063322	1063277	-45	YDR301W	230.7	NULL	0.04838244	0.069974467	0.110492024	0.104870291	0.02331564	0.104870291	0.221953283	0.080892654
1164	1172	ANT061	chrIV	+	TATA-less	TAF1-enriched	16	1071475	1071440	-35	ANT061	7.3	NULL	0.184875314	1	0.333333333	0.666666667	0.704816765	0.055555556	1	0.888888889
1165	1173	YDR303C	chrIV	-	TATA-less	TAF1-enriched	5198	1071475	1071678	-203	YDR303C	941.2	NULL	0.002685983	0.003261123	0.015494295	0.263552477	0.002685983	0.023868442	0.179712495	0.015494295
1166	1174	YDR305C	chrIV	-	TATA-less	TAF1-enriched	170	1073424	1073462	-38	YDR305C	644.3	NULL	0.006945558	0.006945558	0.04332537	1	0.006338844	0.176565351	0.085011657	0.042651237
1167	1175	YDR307W	chrIV	+	TATA-less	TAF1-enriched	333	1075878	1075818	-60	YDR307W	1451.3	NULL	0.005855932	0.214542019	0.203693596	1	0.005576156	0.413176151	0.766230334	0.177015983
1168	1176	YDR308C	chrIV	-	TATA-less	TAF1-depleted	594	1078450	1078490	-40	YDR308C	418.7	NULL	0.303052329	0.048783581	0.424874689	0.339408154	0.024343384	0.503357576	0.331829403	0.176565351
1169	1177	YDR309C	chrIV	-	TATA-less	TAF1-depleted	1774	1080256	1080313	-57	YDR309C	1278.2	NULL	0.008246738	0.008133895	0.048798093	0.087703529	0.026179124	0.511319908	0.200353348	0.895493084
1170	1178	ST0657	chrIV	+	TATA-containing	TAF1-depleted	61	1080869	1080797	-72	ST0657	59.2	NULL	0.186557552	0.859946052	0.48620496	0.141326003	1	1	0.01843028	0.768624792
1171	1179	YDR310C	chrIV	-	TATA-less	TAF1-enriched	79	1084572	1084594	-22	YDR310C	86.6	NULL	1	0.545826818	0.06260547	0.28733307	0.488422317	0.353367292	0.796810213	0.507386527
1172	1180	YDR311W	chrIV	+	TATA-less	TAF1-enriched	720	1085104	1085062	-42	YDR311W	174.3	NULL	0.346843113	0.932087071	0.694417686	0.694417686	0.345986525	0.694417686	0.932206034	0.59928633
1173	1181	YDR312W	chrIV	+	TATA-less	TAF1-enriched	4842	1087572	1087549	-23	YDR312W	202.1	NULL	0.046386593	0.111611768	0.329609605	0.583882421	0.521551992	0.329609605	0.128645924	1
1174	1182	YDR313C	chrIV	-	TATA-less	TAF1-enriched	187	1090097	1090151	-54	YDR313C	506.3	NULL	0.007154342	0.785246408	0.041979528	0.57481922	0.007154342	0.657788651	0.522396205	0.041979528
1175	1183	YDR314C	chrIV	-	TATA-less	TAF1-enriched	93	1092529	1092574	-45	YDR314C	442.3	NULL	0.863951761	0.666143638	0.685167447	0.228361945	0.191490579	1	0.439858381	0.184897599
1176	1184	YDR316W	chrIV	+	TATA-less	TAF1-enriched	398	1093792	1093759	-33	YDR316W	317.1	NULL	0.775867448	0.01849969	0.888854163	0.417455426	0.24326518	0.28733307	0.931236421	0.588809187
1177	1185	tF(GAA)D	chrIV	-	TATA-containing	-	4474	1095437	1095472	-35	tF(GAA)D	347.5	NULL	0.79400268	0.31430466	0.802587349	0.802587349	0.595883091	0.802587349	0.595883091	0.802587349
1178	1186	ST4345	chrIV	-	TATA-less	TAF1-enriched	372	1103539	1103541	-2	ST4345	113.6	NULL	0.148125677	0.032207629	0.430614455	0.694417686	0.349393711	0.895810367	0.798561763	0.238557044
1179	1187	YDR319C	chrIV	-	TATA-less	TAF1-enriched	438	NA	1105873	NA	YDR319C	896.3	NULL	0.922865701	0.004697962	0.146399099	0.026183688	0.11956436	0.573775404	0.004532406	0.573775404
1180	1188	CUT081	chrIV	+	TATA-containing	TAF1-enriched	91	1106128	1106114	-14	CUT081	63.5	NULL	0.443898466	0.201147528	0.894849724	0.049491231	0.008360374	0.59928633	1	0.049491231
1181	1189	YDR320C	chrIV	-	TATA-less	TAF1-enriched	357	1108098	1108112	-14	YDR320C	581.1	NULL	0.007154342	0.054503134	0.217808754	0.301326595	0.030081867	0.078947122	0.185728553	0.175157922
1182	1190	YDR321W	chrIV	+	TATA-less	TAF1-enriched	680	1108720	1108668	-52	YDR321W	4252.7	NULL	0.008021847	0.797866593	0.086730865	0.231310785	0.549408625	0.086730865	0.049185351	0.691728538
1183	1191	YDR322W	chrIV	+	TATA-less	TAF1-enriched	3431	1110611	1110572	-39	YDR322W	825.1	NULL	0.435236127	NaN	0.005188608	NaN	0.128645924	NaN	NaN	0.080118314
1184	1192	YDR322C-A	chrIV	-	TATA-less	TAF1-enriched	219	1112265	1112318	-53	YDR322C-A	4644.9	NULL	0.006740038	0.005950856	0.265205393	0.470486422	0.034233202	0.039979603	0.266947566	0.039979603
1185	1193	YDR323C	chrIV	-	TATA-less	TAF1-enriched	8	1113856	1113988	-132	YDR323C	127.5	NULL	0.791268113	0.030987496	0.690816272	0.894523556	0.197157484	0.353367292	0.863711407	0.353367292
1186	1194	YDR324C	chrIV	-	TATA-less	TAF1-enriched	284	1116674	1116708	-34	YDR324C	629.6	NULL	0.061930587	0.043622116	0.684195574	0.057677444	0.297817462	0.057677444	1	0.344156576
1187	1195	YDR325W	chrIV	+	TATA-less	TAF1-enriched	185	1117148	1117112	-36	YDR325W	135.4	NULL	0.603988754	0.199557256	0.787615767	0.894849724	0.791651777	0.111611768	0.346843113	0.787615767
1188	1196	YDR326C	chrIV	-	TATA-containing	TAF1-enriched	206	1125079	1125112	-33	YDR326C	244.6	NULL	0.040474552	0.013296732	0.048106828	0.14472819	0.020713285	0.048798093	0.102340692	0.048798093
1189	1197	YDR328C	chrIV	-	TATA-less	TAF1-enriched	669	1126019	1126068	-49	YDR328C	6668.6	NULL	0.001556573	0.001313653	0.005188608	NaN	0.001313653	0.005188608	0.050186187	0.005188608
1190	1198	YDR329C	chrIV	-	TATA-less	TAF1-enriched	291	1127581	1127622	-41	YDR329C	389.9	NULL	0.382993842	0.037666922	0.046044853	0.279641534	0.006842389	0.046730149	0.086067568	0.501992689
1191	1199	YDR330W	chrIV	+	TATA-less	TAF1-enriched	530	1127845	1127813	-32	YDR330W	731.9	NULL	0.007690497	0.046784411	0.132006336	0.045361665	0.01849969	0.506054349	0.007366379	0.046044853
1192	1200	YDR331W	chrIV	+	TATA-less	TAF1-enriched	3107	1129619	1129558	-61	YDR331W	512.4	NULL	0.215924939	0.038015068	0.892152103	0.06260547	0.600670882	0.110492024	0.016065427	0.208468351
1193	1201	YDR332W	chrIV	+	TATA-less	TAF1-enriched	458	1131033	1131001	-32	YDR332W	162.7	NULL	0.30562919	0.668385514	0.533333333	0.600401848	0.609758799	0.4	0.145986278	0.600401848
1194	1202	YDR333C	chrIV	-	TATA-less	TAF1-enriched	63	1135420	1135468	-48	YDR333C	1398.4	NULL	0.001688186	1	0.005188608	NaN	0.001733589	NaN	NaN	0.005188608
1195	1203	YDR334W	chrIV	+	TATA-less	TAF1-enriched	647	1135819	1135775	-44	YDR334W	130.2	NULL	0.550114935	1	1	0.594729336	0.550817954	0.048798093	0.387337939	1
1196	1204	YDR335W	chrIV	+	TATA-less	TAF1-enriched	7885	1140850	1140811	-39	YDR335W	328.9	NULL	0.003261123	0.015051346	0.136037128	0.802587349	0.003061939	0.07723562	0.191694602	0.015494295
1197	1205	orphan	chrIV	+	TATA-less	TAF1-enriched	275	1145246	1145085	-161	orphan	326.8	NULL	0.104184357	0.199557256	0.894849724	0.105997548	0.931847255	0.047417494	0.863951761	0.354866599
1198	1206	CUT522	chrIV	-	TATA-less	TAF1-enriched	25	1145893	1146019	-126	CUT522	36.5	NULL	0.864428679	0.60913007	0.049491231	0.359305232	1	0.792771379	0.303052329	0.238557044
1199	1207	YDR337W	chrIV	+	TATA-less	TAF1-enriched	69	1146302	1146281	-21	YDR337W	830.7	NULL	0.341654836	0.542158797	0.176565351	0.659023837	0.056746816	0.779854618	0.785664168	0.04332537
1200	1208	CUT082	chrIV	+	TATA-less	TAF1-enriched	17	1149706	1149585	-121	CUT082	4	NULL	0.776318561	0.633497344	1	0.659215631	0.817520603	0.462343187	0.633497344	0.883132978
1201	1209	YDR339C	chrIV	-	TATA-less	TAF1-enriched	327	1150508	1150538	-30	YDR339C	2618.4	NULL	0.017966654	0.005303894	0.554772097	0.03605437	0.045789833	0.035410671	0.005855932	0.03605437
1202	1210	tX(XXX)D	chrIV	-	TATA-less	-	369	1150929	1150952	-23	tX(XXX)D	8.4	NULL	0.603988754	0.084385813	0.232774339	0.507386527	0.534549972	0.232774339	0.600670882	0.594729336
1203	1211	YDR341C	chrIV	-	TATA-less	TAF1-enriched	468	1153618	1153647	-29	YDR341C	6108.5	NULL	0.005303894	0.006143194	0.888854163	0.871798602	0.929165456	0.871798602	0.737315677	0.871798602
1204	1212	CUT083	chrIV	+	TATA-less	TAF1-enriched	38	1153928	1153894	-34	CUT083	31.8	NULL	0.016446959	0.549408625	0.047417494	0.047417494	0.226187914	0.590013887	0.931847255	0.081865671
1205	1213	YDR345C	chrIV	-	TATA-containing	TAF1-depleted	7416	1164568	1164692	-124	YDR345C	7538	NULL	0.00503917	0.00503917	0.033499083	0.87832485	0.00503917	0.083264517	0.783550609	0.135166272
1206	1214	orphan	chrIV	-	TATA-less	TAF1-enriched	15	1165545	1165595	-50	orphan	6.9	NULL	0.460606061	0.048484848	0.044444444	0.088888889	0.933333333	0.711111111	0.233663465	0.533333333
1207	1215	YDR347W	chrIV	+	TATA-less	TAF1-enriched	255	1169124	1169102	-22	YDR347W	861.1	NULL	0.019373319	0.012178835	0.137134544	0.48620496	0.042839137	0.329609605	0.537638448	0.138408493
1208	1216	YDR348C	chrIV	-	TATA-less	TAF1-depleted	1205	1171974	1172022	-48	YDR348C	155.8	NULL	0.098643753	0.007690497	0.083811901	0.112729874	0.012652434	0.048106828	0.123712341	0.135857322
1209	1217	YDR349C	chrIV	-	TATA-less	TAF1-enriched	230	1174227	1174248	-21	YDR349C	1917	NULL	0.001556573	0.001313653	0.005188608	0.080118314	0.001688186	0.004915802	0.215924939	NaN
1210	1218	ST0685	chrIV	+	TATA-less	TAF1-enriched	24	NA	1174481	NA	ST0685	326.4	NULL	0.265387054	0.017010283	0.18763233	0.4291953	0.009897647	0.354866599	0.045593068	0.048106828
1211	1219	orphan	chrIV	+	TATA-less	TAF1-enriched	6	1175029	1175014	-15	orphan	141.7	NULL	0.733646789	0.008021847	0.4	0.044444444	0.172722365	0.044444444	0.072727273	0.508708087
1212	1220	ST4366	chrIV	-	TATA-less	TAF1-enriched	162	1174791	1174821	-30	ST4366	187.5	NULL	0.148125677	0.393272891	0.232774339	0.084784996	0.607225552	0.14972246	0.017219911	0.288844366
1213	1221	YDR350C	chrIV	-	TATA-less	TAF1-enriched	1754	1178006	1178160	-154	YDR350C	156.6	NULL	0.197157484	0.199557256	0.597027084	0.692632784	0.490777995	0.235679913	0.864190848	0.894194334
1214	1222	YDR351W	chrIV	+	TATA-less	TAF1-depleted	1131	1178488	1178445	-43	YDR351W	83.1	NULL	0.106024499	0.268767553	0.711111111	0.600401848	0.864900617	0.4	0.282828283	0.693529129
1215	1223	CUT524	chrIV	-	TATA-less	TAF1-enriched	15	1182966	1182991	-25	CUT524	53.5	NULL	0.146700539	0.032514852	0.895172885	1	0.439858381	0.426325543	0.394107149	0.792771379
1216	1224	YDR353W	chrIV	+	TATA-less	TAF1-enriched	12204	1183295	1183251	-44	YDR353W	4605.1	NULL	1	0.007581651	1	1	0.546549968	1	0.796096689	0.047417494
1217	1225	YDR354W	chrIV	+	TATA-less	TAF1-enriched	1001	1184757	1184671	-86	YDR354W	1257.7	NULL	0.154578895	0.003193895	0.263552477	0.802587349	0.003261123	0.802587349	0.694095468	0.802587349
1218	1226	orphan	chrIV	+	TATA-less	TAF1-enriched	191	1186133	1186096	-37	orphan	251.4	NULL	0.231192354	0.039064406	0.690816272	0.087703529	0.439858381	0.113846298	0.19875925	0.693529129
1219	1227	YDR357C	chrIV	-	TATA-less	TAF1-depleted	137	1189517	1189565	-48	YDR357C	1568.5	NULL	0.006143194	0.006338844	0.06635304	1	0.010081336	0.036701192	0.013328329	0.093532513
1220	1228	YDR358W	chrIV	+	TATA-containing	TAF1-depleted	2471	1190062	1190025	-37	YDR358W	403.5	NULL	0.194740405	0.487629882	0.058495155	0.222376248	0.098026461	0.137134544	0.377660987	0.04332537
1221	1229	YDR359C	chrIV	-	TATA-less	TAF1-depleted	117	1195277	1195403	-126	YDR359C	25.6	NULL	0.932206034	0.932206034	0.359305232	0.359305232	0.670582894	0.792771379	0.670582894	0.238557044
1222	1230	YDR361C	chrIV	-	TATA-less	TAF1-depleted	442	1196250	1196297	-47	YDR361C	2071.2	NULL	0.215924939	0.001556573	0.004915802	0.004915802	0.001556573	0.004915802	0.01012654	0.004915802
1223	1231	YDR362C	chrIV	-	TATA-less	TAF1-enriched	312	1198899	1198956	-57	YDR362C	67.7	NULL	0.103570182	0.083264517	0.48620496	0.047417494	0.297569609	0.063431425	0.226187914	0.48620496
1224	1232	YDR363W	chrIV	+	TATA-less	TAF1-enriched	213	1199053	1199007	-46	YDR363W	450.7	NULL	0.039415782	0.046386593	0.430614455	0.894849724	0.488422317	1	0.020713285	0.510019168
1225	1233	tK(CUU)D1	chrIV	+	TATA-less	-	272	1201755	1201739	-16	tK(CUU)D1	72.7	NULL	0.910979293	0.208131634	0.573775404	0.573775404	0.358771893	0.573775404	0.358771893	0.573775404
1226	1234	YDR363W-A	chrIV	+	TATA-less	TAF1-enriched	823	NA	1202106	NA	YDR363W-A	5809.7	NULL	0.007049543	0.12769437	0.041979528	0.299445905	0.007154342	0.299445905	0.632142422	0.041310308
1227	1235	YDR364C	chrIV	-	TATA-less	TAF1-enriched	63	1204168	1204233	-65	YDR364C	350.8	NULL	0.007473611	0.007473611	0.507386527	0.046044853	0.93148272	0.046730149	0.084385813	0.046730149
1228	1236	YDR365C	chrIV	-	TATA-less	TAF1-enriched	331	1206390	1206458	-68	YDR365C	4493.4	NULL	1	0.085507023	0.790241066	0.598161453	1	0.598161453	0.008133895	0.137134544
1229	1237	YDR367W	chrIV	+	TATA-less	TAF1-enriched	399	1212852	1212805	-47	YDR367W	939.1	NULL	0.017913184	0.297569609	0.148263844	0.576150122	0.91124672	0.027362545	0.360765351	0.055859225
1230	1238	YDR368W	chrIV	+	TATA-less	TAF1-enriched	1445	1213929	1213853	-76	YDR368W	567.4	NULL	0.731370313	0.047182916	0.104870291	0.788281321	1	1	0.789711992	1
1231	1239	orphan	chrIV	-	TATA-less	TAF1-depleted	34	1217550	1217572	-22	orphan	107.3	NULL	0.124377909	0.040474552	0.113846298	0.232774339	0.348546687	0.147232255	0.049587742	0.1484791
1232	1240	YDR370C	chrIV	-	TATA-containing	TAF1-enriched	81	1219097	1219114	-17	YDR370C	345.2	NULL	0.046386593	0.186557552	0.104870291	0.125525756	0.024084965	0.786943898	0.094316816	0.494997202
1233	1241	YDR371W	chrIV	+	TATA-less	TAF1-enriched	44	1219390	1219373	-17	YDR371W	297.8	NULL	0.013997936	0.046265852	0.02677094	0.419740503	0.008049086	0.146399099	0.634392372	0.02677094
1234	1242	YDR372C	chrIV	-	TATA-less	TAF1-enriched	144	1222399	1222412	-13	YDR372C	1872.6	NULL	0.010514866	0.017219911	0.125525756	0.460343996	0.010661334	0.036701192	0.021804466	0.124220661
1235	1243	YDR373W	chrIV	+	TATA-less	TAF1-depleted	172	1222718	1222699	-19	YDR373W	417.6	NULL	0.006437908	0.007049543	0.100348246	0.20208631	0.006437908	0.100348246	0.594483332	0.04332537
1236	1244	YDR374W-A	chrIV	+	TATA-less	TAF1-enriched	159	1224797	1224739	-58	YDR374W-A	284.7	NULL	0.021625614	0.172722365	0.088675943	0.188991722	0.039415782	0.238557044	0.608498302	0.792771379
1237	1245	YDR375C	chrIV	-	TATA-less	TAF1-enriched	319	1226535	1226552	-17	YDR375C	192.4	NULL	0.147413673	0.348546687	0.345717816	0.508708087	0.194740405	0.508708087	0.798561763	0.691728538
1238	1246	YDR377W	chrIV	+	TATA-less	TAF1-depleted	325	1228579	1228544	-35	YDR377W	1035.8	NULL	0.546549968	0.020939966	0.288844366	0.046730149	0.329076491	0.046730149	0.289756002	0.590013887
1239	1247	YDR378C	chrIV	-	TATA-less	TAF1-enriched	888	1229571	1229613	-42	YDR378C	8850.7	NULL	0.035938931	0.005950856	0.040643643	0.295641821	0.006537796	0.295641821	0.125786425	0.295641821
1240	1248	YDR379W	chrIV	+	TATA-less	TAF1-enriched	91	1230266	1230123	-143	YDR379W	65.8	NULL	0.797516299	0.731830274	1	1	0.586516917	0.508708087	1	0.889235607
1241	1249	ST4385	chrIV	-	TATA-less	TAF1-enriched	447	1236142	1236163	-21	ST4385	90.7	NULL	0.93196748	0.087748841	0.512610438	1	0.545100219	0.14972246	0.864190848	1
1242	1250	YDR381W	chrIV	+	TATA-containing	TAF1-depleted	1132	1236648	1236461	-187	YDR381W	3279.4	NULL	0.005303894	0.006240605	0.035410671	0.03605437	0.005303894	0.03605437	0.006143194	0.035410671
1243	1251	YDR381C-A	chrIV	-	TATA-containing	TAF1-enriched	207	1238962	1238997	-35	YDR381C-A	83.2	NULL	0.013624302	0.864900617	0.1484791	0.600401848	0.233663465	0.793389781	0.125706788	0.044444444
1244	1252	orphan	chrIV	-	TATA-less	TAF1-enriched	119	1238962	1239033	-71	orphan	29.4	NULL	0.931726391	0.440673311	0.507386527	0.690816272	0.487629882	0.690816272	0.49463363	0.690816272
1245	1253	YDR382W	chrIV	+	TATA-less	TAF1-depleted	27041	1239585	1239411	-174	YDR382W	105573.2	NULL	0.001688186	0.001313653	0.004915802	NaN	0.001688186	0.004915802	0.009454169	0.005188608
1246	1254	CUT088	chrIV	+	TATA-less	TAF1-enriched	107	1240317	1240183	-134	CUT088	88	NULL	0.339899051	0.261101437	0.500616604	1	0.238625569	0.686130413	0.785664168	0.345717816
1247	1255	YDR384C	chrIV	-	TATA-less	TAF1-depleted	2245	NA	1242146	NA	YDR384C	349.2	NULL	0.585769293	0.007366379	0.04332537	0.210044337	0.318700276	0.079919784	0.037666922	0.058495155
1248	1256	CUT089	chrIV	+	TATA-less	TAF1-enriched	58	1242852	1242725	-127	CUT089	44.9	NULL	0.2645353	0.342527737	0.048106828	1	1	0.231310785	0.047981942	0.048106828
1249	1258	YDR385W	chrIV	+	TATA-less	TAF1-depleted	55859	1243221	1243145	-76	YDR385W	33418.7	NULL	0.006143194	0.006143194	0.035410671	0.765087193	0.006143194	0.035410671	0.099317849	0.03605437
1250	1259	YDR386W	chrIV	+	TATA-less	TAF1-enriched	309	NA	1246063	NA	YDR386W	146.8	NULL	0.548699	0.495394415	0.895810367	0.238557044	0.932206034	0.512610438	0.932206034	0.694417686
1251	1260	YDR387C	chrIV	-	TATA-less	TAF1-enriched	937	1249906	1249918	-12	YDR387C	703.4	NULL	0.001313653	0.129595844	0.004915802	NaN	0.001688186	NaN	NaN	0.080118314
1252	1261	YDR388W	chrIV	+	TATA-less	TAF1-enriched	686	1250199	1250135	-64	YDR388W	4297.9	NULL	0.145270893	0.057647984	0.14472819	0.888854163	0.047182916	0.183522244	0.339899051	0.143471009
1253	1262	orphan	chrIV	-	TATA-less	TAF1-enriched	27	1251618	1251661	-43	orphan	14.8	NULL	0.436563363	0.797516299	0.288844366	0.512610438	1	0.234230702	0.08830911	0.508708087
1254	1263	orphan	chrIV	+	TATA-less	TAF1-enriched	529	1252041	1252012	-29	orphan	748	NULL	0.007910597	0.01625572	0.046730149	0.68989587	0.345986525	0.417455426	0.796810213	0.14472819
1255	1264	YDR390C	chrIV	-	TATA-less	TAF1-enriched	14170	1257072	1257079	-7	YDR390C	1067.8	NULL	0.529799874	0.034094293	1	0.20208631	0.277647016	1	1	0.128127096
1256	1265	orphan	chrIV	-	TATA-containing	TAF1-enriched	7341	1258062	1258063	-1	orphan	4109.8	NULL	0.004782003	0.004782003	0.026183688	0.052107267	0.004055953	0.026183688	0.004055953	0.573775404
1257	1266	YDR392W	chrIV	+	TATA-less	TAF1-enriched	333	1258682	1258659	-23	YDR392W	354.2	NULL	0.143118038	0.06694755	1	0.426325543	0.19875925	0.111611768	0.016594238	0.046730149
1258	1267	YDR393W	chrIV	+	TATA-less	TAF1-enriched	41	1259886	1259884	-2	YDR393W	481.6	NULL	0.788521794	0.087495838	0.887685742	0.03605437	0.006240605	0.035410671	0.016387834	0.035410671
1259	1268	ST4395	chrIV	-	TATA-less	TAF1-depleted	57	1261353	1261373	-20	ST4395	454.2	NULL	0.006338844	0.007259955	0.042651237	0.04332537	0.296934286	0.04332537	0.216793336	0.892845929
1260	1269	YDR394W	chrIV	+	TATA-less	TAF1-enriched	2536	1261633	1261587	-46	YDR394W	3613.3	NULL	0.056297	0.007366379	0.042651237	1	0.008865958	1	0.524902502	0.676082741
1261	1270	YDR395W	chrIV	+	TATA-less	TAF1-enriched	2045	1263255	1263216	-39	YDR395W	1381.3	NULL	0.197157484	0.006740038	1	0.2811981	0.362760723	0.35033841	0.294266104	0.687084608
1262	1271	YDR397C	chrIV	-	TATA-containing	TAF1-depleted	295	1266856	1266957	-101	YDR397C	2449.6	NULL	0.001688186	0.001688186	0.080118314	0.080118314	0.001313653	0.005188608	0.001313653	0.004915802
1263	1272	YDR398W	chrIV	+	TATA-less	TAF1-enriched	1622	1267460	1267434	-26	YDR398W	1122.2	NULL	0.322525783	0.12002519	0.112351198	0.283876475	0.032993937	0.283876475	0.12002519	0.283876475
1264	1273	orphan	chrIV	-	TATA-containing	TAF1-enriched	186	1269380	1269395	-15	orphan	21.9	NULL	0.232842047	0.19875925	0.694417686	0.14972246	0.349393711	0.895810367	0.864428679	0.14972246
1265	1274	CUT528	chrIV	-	TATA-less	TAF1-enriched	17	1269380	1269484	-104	CUT528	23.5	NULL	0.496151813	0.551517708	0.711111111	0.266666667	0.367676768	0.711111111	0.443097314	0.116073943
1266	1275	YDR399W	chrIV	+	TATA-less	TAF1-depleted	18636	1270126	1270004	-122	YDR399W	3181.4	NULL	0.09307828	0.006143194	0.035410671	0.035410671	0.006143194	0.035410671	0.128066265	0.035410671
1267	1276	YDR400W	chrIV	+	TATA-less	TAF1-enriched	645	NA	1271039	NA	YDR400W	1855.7	NULL	0.007690497	0.035204818	0.206884586	0.206884586	0.006740038	0.206884586	0.929963802	0.206884586
1268	1277	YDR404C	chrIV	-	TATA-less	TAF1-enriched	21534	1277297	1277361	-64	YDR404C	2064.3	NULL	0.16585666	0.046784411	0.345717816	0.686130413	0.046386593	0.104870291	0.66269405	0.076031041
1269	1278	YDR405W	chrIV	+	TATA-less	TAF1-enriched	41	1277654	1277574	-80	YDR405W	227.9	NULL	0.232018345	0.008246738	0.113846298	0.792147392	0.008246738	0.424874689	0.392435278	0.065086726
1270	1279	orphan	chrIV	-	TATA-containing	TAF1-enriched	11	1278436	1278504	-68	orphan	7.9	NULL	0.275653976	0.771705901	0.878481743	0.617075077	0.771175584	0.878481743	0.197627436	0.444586739
1271	1280	YDR406W	chrIV	+	TATA-containing	TAF1-depleted	2003	1279204	1279084	-120	YDR406W	1667.6	NULL	0.007154342	0.24326518	0.041979528	0.042651237	0.099260737	0.494997202	0.068964333	0.223883771
1272	1281	ST4401	chrIV	-	TATA-less	TAF1-enriched	232	1279881	1279925	-44	ST4401	156.5	NULL	0.427199637	0.795375598	0.779854618	0.786943898	0.02741654	0.279641534	0.537638448	0.889235607
1273	1282	YDR407C	chrIV	-	TATA-containing	TAF1-enriched	139	1287991	1288014	-23	YDR407C	612	NULL	0.261963952	0.007910597	0.28733307	0.412866955	0.489211129	0.888854163	0.078220011	0.06260547
1274	1283	orphan	chrIV	+	TATA-containing	TAF1-enriched	1603	1288290	1288266	-24	orphan	73.1	NULL	0.021804466	0.061930587	1	0.124220661	0.013328329	0.1622505	0.051829927	1
1275	1284	YDR408C	chrIV	-	TATA-less	TAF1-enriched	1207	1288906	1288915	-9	YDR408C	2752	NULL	0.021167585	0.018934499	0.147232255	0.894194334	0.013296732	0.692632784	0.54363657	0.687084608
1276	1285	YDR409W	chrIV	+	TATA-less	TAF1-enriched	185	1289399	1289376	-23	YDR409W	180	NULL	0.798215076	0.032207629	1	0.895810367	0.349393711	0.894523556	0.659736375	0.14972246
1277	1286	orphan	chrIV	+	TATA-less	TAF1-enriched	47	1292599	1292536	-63	orphan	28.2	NULL	0.933333333	0.072727273	0.888888889	0.190345809	0.732743159	0.190345809	0.439858381	0.088888889
1278	1287	YDR410C	chrIV	-	TATA-containing	TAF1-enriched	648	1293099	1293109	-10	YDR410C	391.7	NULL	0.524902502	0.360765351	0.02677094	0.576150122	0.004952607	0.576150122	0.360765351	0.02677094
1279	1288	YDR411C	chrIV	-	TATA-less	TAF1-enriched	4640	1294391	1294444	-53	YDR411C	2819.2	NULL	0.001688186	0.001643552	0.004915802	0.004915802	0.001688186	0.005188608	0.049238968	1
1280	1289	YDR412W	chrIV	+	TATA-less	TAF1-enriched	343	1294687	1294640	-47	YDR412W	1233	NULL	0.007473611	0.012178835	0.046730149	0.084784996	0.012178835	0.228361945	0.222804929	0.888854163
1281	1290	orphan	chrIV	+	TATA-less	TAF1-enriched	457	1297046	1297001	-45	orphan	20	NULL	0.56969697	0.394938074	1	0.177777778	0.682828283	0.711111111	0.609758799	0.533333333
1282	1291	YDR415C	chrIV	-	TATA-less	TAF1-enriched	885	1298174	1298189	-15	YDR415C	166.9	NULL	0.008437162	0.435236127	0.076415596	0.105671625	0.315790782	0.027362545	0.577301528	0.052107267
1283	1292	YDR416W	chrIV	+	TATA-less	TAF1-enriched	73	1298388	1298369	-19	YDR416W	332.3	NULL	0.050394337	0.550817954	0.430614455	0.792771379	0.074024444	0.792771379	0.346843113	0.048798093
1284	1293	CUT532	chrIV	-	TATA-less	TAF1-enriched	60	1300930	1300968	-38	CUT532	39.5	NULL	0.104184357	0.134408254	0.691728538	0.787615767	0.39159429	0.085758003	1	0.894849724
1285	1294	orphan	chrIV	+	TATA-less	TAF1-enriched	29	1301424	1301281	-143	orphan	18.9	NULL	0.123046028	0.489211129	0.894849724	0.418961725	0.797516299	0.354866599	0.440673311	0.145981945
1286	1295	YDR418W	chrIV	+	TATA-less	TAF1-enriched	133605	1301639	1301582	-57	YDR418W	39718.8	NULL	0.008133895	0.007154342	0.692632784	0.048106828	0.54363657	0.048106828	0.007800146	0.344156576
1287	1296	YDR420W	chrIV	+	TATA-less	TAF1-enriched	1047	1306040	1306017	-23	YDR420W	391.3	NULL	0.267926383	0.439858381	0.232774339	0.1484791	0.930608862	1	0.345126713	0.113846298
1288	1297	YDR422C	chrIV	-	TATA-less	TAF1-enriched	680	NA	1317829	NA	YDR422C	965.7	NULL	0.107433383	1	0.036777943	0.802587349	0.016928066	0.872382973	0.595883091	0.036777943
1289	1298	orphan	chrIV	+	TATA-less	TAF1-enriched	10	1318265	1318142	-123	orphan	12.3	NULL	0.307332348	0.367676768	0.266666667	0.533333333	0.609758799	0.266666667	0.933333333	0.533333333
1290	1299	YDR423C	chrIV	-	TATA-less	TAF1-enriched	129	1319188	1319219	-31	YDR423C	1318.1	NULL	0.026445101	0.008246738	1	0.18763233	0.104184357	0.1484791	0.550114935	0.894523556
1291	1300	YDR424C	chrIV	-	TATA-less	TAF1-enriched	295	1319831	1319877	-46	YDR424C	1901.6	NULL	0.007154342	0.007049543	0.042651237	0.042651237	0.007154342	0.137134544	0.659135465	0.076031041
1292	1301	YDR427W	chrIV	+	TATA-less	TAF1-enriched	1227	1322221	1322173	-48	YDR427W	345.1	NULL	0.004952607	0.010983407	0.027362545	0.027362545	0.004782003	0.027362545	0.311071854	0.872382973
1293	1302	YDR429C	chrIV	-	TATA-less	TAF1-enriched	1552	1325280	1325319	-39	YDR429C	9062.2	NULL	0.001643552	0.001556573	0.004915802	NaN	0.215924939	0.004915802	1	NaN
1294	1303	YDR432W	chrIV	+	TATA-less	TAF1-enriched	16083	1328815	1328759	-56	YDR432W	37505.4	NULL	0.001556573	0.001556573	0.005188608	0.004915802	0.001313653	0.005188608	0.001313653	0.004915802
1295	1304	YDR434W	chrIV	+	TATA-containing	TAF1-enriched	267	1331177	1331141	-36	YDR434W	1006.1	NULL	0.006842389	0.006842389	0.040643643	0.040643643	0.006842389	0.039979603	0.313831549	0.039979603
1296	1305	CUT094	chrIV	+	TATA-less	TAF1-enriched	1087	1334338	1334253	-85	CUT094	116.2	NULL	0.017010283	0.838256486	0.484695003	0.554772097	0.330915337	0.112351198	0.218758005	1
1297	1306	YDR436W	chrIV	+	TATA-less	TAF1-depleted	778	1334724	1334576	-148	YDR436W	197.1	NULL	0.682828283	0.56969697	0.06674615	0.085758003	0.348546687	0.4	0.733196121	0.088888889
1298	1307	YDR437W	chrIV	+	TATA-less	TAF1-enriched	45	1337294	1337268	-26	YDR437W	359.8	NULL	0.297569609	0.006338844	0.239316541	0.036701192	0.006240605	0.03605437	0.329076491	0.06635304
1299	1308	YDR439W	chrIV	+	TATA-less	TAF1-enriched	70	1339629	1339467	-162	YDR439W	41.9	NULL	0.808080808	0.933333333	0.711111111	0.600401848	0.016161616	0.888888889	0.109090909	0.044444444
1300	1309	YDR441C	chrIV	-	TATA-containing	TAF1-enriched	1875	1345019	1345103	-84	YDR441C	593.5	NULL	0.013624302	0.033131861	0.14972246	0.694417686	0.148125677	1	0.39159429	0.512610438
1301	1310	YDR443C	chrIV	-	TATA-less	TAF1-enriched	81	1349969	1349985	-16	YDR443C	414.3	NULL	0.007366379	0.096790993	0.046044853	0.132006336	0.007366379	0.132006336	0.135870597	0.046044853
1302	1311	YDR444W	chrIV	+	TATA-less	TAF1-enriched	256	1350266	1350225	-41	YDR444W	212.9	NULL	0.667829275	0.731370313	0.14472819	0.588809187	0.296048012	1	0.855850327	0.342584628
1303	1312	YDR447C	chrIV	-	TATA-less	TAF1-enriched	767	1355525	1355588	-63	YDR447C	3652.1	NULL	0.048783581	0.122378978	0.208468351	0.49783023	0.172197819	0.14094646	0.431512173	0.588809187
1304	1313	YDR448W	chrIV	+	TATA-containing	TAF1-depleted	143	1356060	1356029	-31	YDR448W	210.6	NULL	0.026979768	0.931847255	0.266666667	0.888888889	0.032514852	1	0.933333333	0.088888889
1305	1314	YDR449C	chrIV	-	TATA-less	TAF1-enriched	253	1358892	1358941	-49	YDR449C	1251.9	NULL	0.005950856	0.102470435	0.033499083	0.87832485	0.00503917	0.177015983	0.857255229	0.034132951
1306	1315	CUT095	chrIV	+	TATA-less	TAF1-enriched	15	1359178	1359173	-5	CUT095	6.9	NULL	0.051943502	0.545100219	0.088675943	0.293325574	0.394107149	0.694417686	0.60913007	1
1307	1316	YDR450W	chrIV	+	TATA-less	TAF1-enriched	7257	NA	1359900	NA	YDR450W	44626.4	NULL	0.001556573	0.001556573	0.004915802	0.004915802	0.001313653	0.004915802	0.001313653	0.004915802
1308	1317	YDR451C	chrIV	-	TATA-containing	TAF1-depleted	235	1362097	1362239	-142	YDR451C	132.2	NULL	0.859946052	0.010514866	0.377494259	0.03605437	0.005393812	0.036701192	0.128902119	0.03605437
1309	1318	YDR452W	chrIV	+	TATA-less	TAF1-enriched	276	1362762	1362744	-18	YDR452W	1828.4	NULL	0.001733589	0.001313653	0.004915802	0.005188608	0.001556573	0.005188608	NaN	0.080118314
1310	1319	orphan	chrIV	+	TATA-less	TAF1-enriched	2	1365503	1365385	-118	orphan	0.7	NULL	0.133614403	NaN	0.133614403	NaN	NaN	NaN	NaN	0.133614403
1311	1320	YDR453C	chrIV	-	TATA-less	TAF1-depleted	1886	1365633	1365725	-92	YDR453C	213.9	NULL	0.074024444	1	0.693529129	0.694417686	0.267926383	0.238557044	0.268767553	0.357835467
1312	1321	YDR454C	chrIV	-	TATA-less	TAF1-enriched	346	1366821	1366843	-22	YDR454C	3652	NULL	0.006842389	0.006537796	0.039979603	0.120288243	0.005950856	0.040643643	0.016594238	0.040643643
1313	1322	CUT097	chrIV	+	TATA-less	TAF1-enriched	49	1367245	1367092	-153	CUT097	20.6	NULL	0.798215076	0.072727273	0.4	0.711111111	0.808080808	0.266666667	0.367676768	0.711111111
1314	1323	YDR456W	chrIV	+	TATA-less	TAF1-enriched	495	1367487	1367457	-30	YDR456W	635.5	NULL	0.033359567	0.004866885	0.104329469	0.03871668	0.033359567	1	0.704233909	0.027362545
1315	1324	YDR457W	chrIV	+	TATA-less	TAF1-depleted	86	1369870	1369710	-160	YDR457W	877.9	NULL	1	0.008021847	0.228361945	0.047417494	0.009634461	0.046730149	0.119703534	0.111611768
1316	1325	YDR458C	chrIV	-	TATA-less	TAF1-enriched	65	1382010	1382072	-62	YDR458C	251.7	NULL	0.031291196	0.054950766	1	0.348808623	0.009634461	0.348808623	0.028887495	0.139679141
1317	1326	YDR459C	chrIV	-	TATA-less	TAF1-enriched	297	1383493	1383539	-46	YDR459C	324.6	NULL	0.060362915	0.08830911	0.692632784	0.238557044	0.104184357	0.188991722	0.074024444	1
1318	1327	YDR460W	chrIV	+	TATA-less	TAF1-enriched	5576	1383733	1383699	-34	YDR460W	630.6	NULL	0.192305942	0.027125386	0.423413012	0.893187858	0.382114238	0.135857322	0.076539994	0.504711414
1319	1328	CUT534	chrIV	-	TATA-less	TAF1-enriched	352	1384677	1384764	-87	CUT534	29.6	NULL	0.201939802	0.268767553	1	0.14972246	0.266236144	0.345717816	0.194740405	0.345717816
1320	1329	YDR461W	chrIV	+	TATA-containing	TAF1-depleted	35301	NA	1385153	NA	YDR461W	2342.8	NULL	0.007910597	0.006945558	0.111611768	1	0.020939966	0.047417494	0.427199637	0.595883091
1321	1330	YDR461C-A	chrIV	-	TATA-less	TAF1-enriched	514	1385761	1385785	-24	YDR461C-A	414.8	NULL	0.046386593	0.007259955	0.48620496	0.342584628	0.479364203	0.076031041	0.013680226	0.042651237
1322	1331	YDR462W	chrIV	+	TATA-less	TAF1-enriched	324	1386074	1386039	-35	YDR462W	1173	NULL	0.006842389	0.930481276	0.041979528	0.484695003	0.006240605	0.499229169	0.030081867	0.657788651
1323	1332	YDR463W	chrIV	+	TATA-less	TAF1-enriched	2456	1386833	1386780	-53	YDR463W	179.2	NULL	0.007259955	0.037666922	0.076031041	1	0.257624077	0.058495155	1	1
1324	1333	YDR464W	chrIV	+	TATA-less	TAF1-enriched	55	NA	1388745	NA	YDR464W	731.4	NULL	0.017280266	0.00576184	0.033499083	0.034132951	0.183229817	0.413176151	0.75585112	0.87832485
1325	1334	YDR465C	chrIV	-	TATA-less	TAF1-enriched	1281	1394561	1394602	-41	YDR465C	2477.1	NULL	0.261963952	0.007366379	0.044680647	0.480085003	0.069974467	0.784889385	0.293333361	0.784889385
1326	1335	orphan	chrIV	-	TATA-less	TAF1-enriched	8	1394928	1394998	-70	orphan	0.9	NULL	0.248213079	0.043596645	NA	NaN	NA	0.248213079	NaN	0.414216178
1327	1336	YDR466W	chrIV	+	TATA-less	TAF1-enriched	251	1394809	1394786	-23	YDR466W	7.8	NULL	0.050394337	0.201147528	0.59928633	0.694417686	1	0.694417686	0.667829275	0.14972246
1328	1337	YDR468C	chrIV	-	TATA-less	TAF1-depleted	141	1398754	1398806	-52	YDR468C	817.3	NULL	0.195548026	0.197157484	1	0.06260547	0.044802434	0.790241066	0.728082961	0.046044853
1329	1338	orphan	chrIV	-	TATA-less	TAF1-enriched	0	NA	1399225	NA	orphan	0.3	NULL	NaN	NaN	NA	NaN	0.617075077	0.479500122	NA	NA
1330	1339	YDR471W	chrIV	+	TATA-less	TAF1-enriched	2351	1401766	1401700	-66	YDR471W	21798.9	NULL	0.001688186	0.049238968	0.004915802	0.080118314	0.001313653	0.004915802	NaN	0.004915802
1331	1340	orphan	chrIV	-	TATA-less	TAF1-enriched	3	NA	1402650	NA	orphan	16.8	NULL	0.367676768	0.394938074	0.4	0.177777778	0.072727273	1	0.56969697	0.294801992
1332	1341	orphan	chrIV	+	TATA-containing	TAF1-depleted	7470	1403017	1402919	-98	orphan	167930.7	NULL	0.041226833	0.595883091	0.802587349	0.802587349	0.595883091	0.802587349	0.595883091	0.802587349
1333	1342	YDR472W	chrIV	+	TATA-less	TAF1-enriched	1456	1403317	1403264	-53	YDR472W	878	NULL	0.006143194	0.848145301	1	0.03605437	0.006143194	0.035410671	0.006143194	0.035410671
1334	1343	YDR473C	chrIV	-	TATA-less	TAF1-enriched	373	1405869	1405908	-39	YDR473C	51.4	NULL	0.808080808	0.682828283	0.044444444	1	0.670037641	0.600401848	0.367676768	0.711111111
1335	1344	ST0764	chrIV	+	TATA-less	TAF1-enriched	87	1406125	1406086	-39	ST0764	77	NULL	1	0.348546687	0.790241066	0.14472819	0.2645353	0.183522244	0.145270893	0.048106828
1336	1345	YDR475C	chrIV	-	TATA-less	TAF1-depleted	98	1410061	1410359	-298	YDR475C	42.2	NULL	0.109090909	0.933333333	0.088888889	0.4	0.061271395	1	0.808080808	0.088888889
1337	1346	YDR476C	chrIV	-	TATA-containing	TAF1-enriched	1681	1411121	1411151	-30	YDR476C	1118.9	NULL	0.001643552	0.001643552	0.004915802	NaN	0.001313653	NaN	NaN	0.005188608
1338	1347	YDR477W	chrIV	+	TATA-less	TAF1-enriched	488	1412124	1412092	-32	YDR477W	1531.5	NULL	0.790104282	0.006842389	0.193930852	0.295641821	0.135139951	0.295641821	0.293333361	1
1339	1348	YDR478W	chrIV	+	TATA-less	TAF1-enriched	86	1414605	1414538	-67	YDR478W	300.4	NULL	0.668938973	0.796096689	0.430614455	0.234230702	0.021167585	0.065915952	0.049990741	0.14972246
1340	1349	YDR479C	chrIV	-	TATA-less	TAF1-enriched	270	1416883	1416922	-39	YDR479C	456.7	NULL	0.021625614	0.008246738	0.049491231	0.238557044	0.349393711	1	0.394107149	0.048798093
1341	1350	YDR480W	chrIV	+	TATA-less	TAF1-enriched	207	1417359	1417354	-5	YDR480W	108.8	NULL	0.088869286	0.147413673	0.177777778	1	0.016161616	0.294801992	0.864665265	0.088888889
1342	1351	YDR481C	chrIV	-	TATA-containing	TAF1-depleted	1166	1420282	1420305	-23	YDR481C	1432.7	NULL	0.025649925	0.72903449	0.351857931	0.503357576	0.931604881	0.080892654	0.727603425	0.351857931
1343	1352	YDR482C	chrIV	-	TATA-less	TAF1-enriched	595	1420837	1420871	-34	YDR482C	406.1	NULL	0.021167585	0.346843113	0.690816272	0.507386527	0.93196748	0.344156576	0.864428679	0.692632784
1344	1353	YDR483W	chrIV	+	TATA-less	TAF1-enriched	13178	1421178	1421131	-47	YDR483W	2298.6	NULL	0.267082584	0.197157484	0.792771379	0.430614455	1	0.356355957	0.492330692	0.065915952
1345	1354	YDR484W	chrIV	+	TATA-less	TAF1-enriched	273	1422778	1422738	-40	YDR484W	794.5	NULL	0.014760323	0.006537796	0.49356279	0.203693596	1	0.889235607	0.722155497	0.420456665
1346	1355	CUT098	chrIV	+	TATA-less	TAF1-depleted	0	1427424	1427346	-78	CUT098	41.5	NULL	0.390749904	0.191490579	0.081865671	0.507386527	0.04838244	0.507386527	0.158868602	0.081865671
1347	1356	YDR486C	chrIV	-	TATA-less	TAF1-enriched	600	1428093	1428129	-36	YDR486C	6268.3	NULL	0.006740038	0.793165548	0.045361665	0.132006336	0.006740038	0.226876582	0.035204818	0.045361665
1348	1357	YDR487C	chrIV	-	TATA-containing	TAF1-depleted	1018	1428981	1429050	-69	YDR487C	6479.7	NULL	0.017010283	1	0.03605437	0.673955067	0.006143194	0.673955067	0.091218926	0.03605437
1349	1358	YDR488C	chrIV	-	TATA-less	TAF1-enriched	107	1430745	1430782	-37	YDR488C	484.1	NULL	0.43573066	0.049990741	0.065086726	0.048798093	0.060362915	0.048798093	0.669489674	0.1484791
1350	1359	YDR489W	chrIV	+	TATA-less	TAF1-enriched	486	1431049	1431014	-35	YDR489W	488.3	NULL	0.007581651	0.007690497	0.045361665	0.103741678	0.007581651	0.206884586	0.014396268	0.132006336
1351	1360	YDR490C	chrIV	-	TATA-less	TAF1-enriched	97	1434290	1434341	-51	YDR490C	435.2	NULL	0.130734222	0.011867751	1	0.344156576	0.190673275	1	0.930608862	0.67502412
1352	1361	YDR492W	chrIV	+	TATA-containing	TAF1-depleted	547	1434765	1434723	-42	YDR492W	600	NULL	0.144554389	0.345986525	1	0.424874689	0.548699	1	1	1
1353	1362	YDR493W	chrIV	+	TATA-less	TAF1-enriched	363	NA	1436135	NA	YDR493W	2693.5	NULL	0.542158797	1	0.595883091	0.145981945	0.390749904	0.111611768	0.303914253	0.145981945
1354	1363	CUT536	chrIV	-	TATA-less	TAF1-enriched	4	1436649	1436681	-32	CUT536	41.7	NULL	0.933333333	0.033441628	0.793389781	0.266666667	0.106024499	0.711111111	0.394938074	0.711111111
1355	1364	YDR494W	chrIV	+	TATA-less	TAF1-enriched	825	1436922	1436897	-25	YDR494W	4354.5	NULL	0.006240605	0.006338844	0.283876475	0.03605437	0.015172523	0.112351198	0.298617674	0.283876475
1356	1365	YDR495C	chrIV	-	TATA-less	TAF1-enriched	14	1441161	1441213	-52	YDR495C	332.8	NULL	0.432363287	0.036700635	0.175157922	0.041979528	0.542158797	0.041979528	0.07136402	0.042651237
1357	1366	YDR496C	chrIV	-	TATA-less	TAF1-enriched	269	1443381	1443431	-50	YDR496C	2060.6	NULL	0.004532406	0.012315703	0.02677094	0.02677094	0.004782003	0.092176992	0.137134544	0.871798602
1358	1367	YDR497C	chrIV	-	TATA-containing	TAF1-depleted	325	1445368	1445524	-156	YDR497C	4182.9	NULL	0.006842389	0.065817128	0.09467072	0.120288243	1	0.120288243	0.016387834	0.09467072
1359	1368	YDR498C	chrIV	-	TATA-less	TAF1-enriched	190	1446982	1447037	-55	YDR498C	729	NULL	0.195548026	0.007473611	0.14472819	1	0.795737098	0.682224553	0.116343478	1
1360	1369	YDR499W	chrIV	+	TATA-less	TAF1-enriched	172	1447846	1447837	-9	YDR499W	177.1	NULL	0.007800146	0.006842389	1	0.046730149	0.19875925	1	0.931359902	0.339408154
1361	1370	YDR500C	chrIV	-	TATA-less	TAF1-enriched	517	1450787	1450863	-76	YDR500C	2946.7	NULL	0.012335776	0.007910597	0.110492024	0.110492024	0.057197149	0.046730149	0.059003394	0.17936415
1362	1371	YDR502C	chrIV	-	TATA-less	TAF1-depleted	2930	1454412	1454512	-100	YDR502C	633	NULL	0.200353348	0.54363657	0.291840545	1	0.864190848	0.147232255	0.932087071	0.048798093
1363	1372	YDR503C	chrIV	-	TATA-less	TAF1-enriched	146	1455889	1455931	-42	YDR503C	631	NULL	0.007910597	0.057197149	0.232774339	0.232774339	0.342527737	0.046044853	0.122378978	0.507386527
1364	1373	ST0779	chrIV	+	TATA-less	TAF1-enriched	9	1456297	1456179	-118	ST0779	114.2	NULL	0.153535354	0.349393711	0.533333333	0.888888889	0.682828283	0.044444444	0.609758799	0.508708087
1365	1374	ST0780	chrIV	+	TATA-less	TAF1-enriched	40	1459811	1459752	-59	ST0780	282.3	NULL	0.020939966	0.032822933	0.1484791	0.087703529	0.265387054	0.511319908	0.261963952	1
1366	1375	YDR506C	chrIV	-	TATA-less	TAF1-enriched	21	1461567	1461572	-5	YDR506C	111.3	NULL	0.348546687	1	0.693529129	0.113846298	0.19875925	0.1484791	0.348546687	0.511319908
1367	1376	YDR507C	chrIV	-	TATA-less	TAF1-depleted	3928	1465898	1465905	-7	YDR507C	876.5	NULL	0.006842389	0.006740038	0.040643643	0.671784971	0.016594238	0.776814004	0.147758692	0.208468351
1368	1377	YDR508C	chrIV	-	TATA-containing	TAF1-depleted	652	1468370	1468488	-118	YDR508C	492.4	NULL	0.008360374	0.049990741	0.14972246	0.430614455	0.008360374	0.14972246	0.733196121	0.088675943
1369	1378	YDR510W	chrIV	+	TATA-less	TAF1-enriched	2590	1469354	1469323	-31	YDR510W	8626.3	NULL	0.256747856	0.007473611	0.044001861	1	0.196353718	0.044001861	0.722155497	1
1370	1379	orphan	chrIV	-	TATA-less	TAF1-enriched	32	1469653	1469695	-42	orphan	2.6	NULL	0.049185351	0.862737091	0.691728538	0.047417494	0.489211129	0.047417494	0.332739927	0.590013887
1371	1380	YDR511W	chrIV	+	TATA-less	TAF1-enriched	7160	1470035	1470000	-35	YDR511W	351.9	NULL	0.069974467	0.228700567	0.14472819	0.688030163	0.602671521	1	0.546549968	0.143471009
1372	1381	YDR512C	chrIV	-	TATA-less	TAF1-depleted	239	1470765	1470773	-8	YDR512C	656.8	NULL	0.86249023	0.345126713	0.047417494	0.081865671	0.428069831	0.047417494	0.103570182	0.047417494
1373	1382	YDR513W	chrIV	+	TATA-containing	TAF1-depleted	5593	1471198	1470995	-203	YDR513W	6524.4	NULL	0.10666884	0.003261123	0.015494295	0.015975041	0.002685983	0.015975041	0.025844118	0.015975041
1374	1383	YDR516C	chrIV	-	TATA-containing	TAF1-depleted	225	1476441	1476528	-87	YDR516C	3477.8	NULL	0.007366379	0.289756002	0.04332537	0.04332537	0.007366379	0.104870291	0.254772333	0.079919784
1375	1384	YDR517W	chrIV	+	TATA-less	TAF1-enriched	1093	1477179	1477166	-13	YDR517W	1497.4	NULL	0.018716589	0.331829403	0.042651237	0.67502412	0.007259955	0.301326595	0.07136402	0.042651237
1376	1385	YDR518W	chrIV	+	TATA-less	TAF1-enriched	1430	1478640	1478583	-57	YDR518W	490.5	NULL	0.006842389	0.005950856	0.09467072	0.193930852	0.158084651	1	0.234859907	0.040643643
1377	1386	YDR519W	chrIV	+	TATA-less	TAF1-enriched	308	1480425	1480380	-45	YDR519W	1696.3	NULL	0.008133895	0.010434401	0.048106828	0.065086726	0.007154342	0.048798093	0.732743159	0.18763233
1378	1387	YDR520C	chrIV	-	TATA-less	TAF1-enriched	301	1483468	1483489	-21	YDR520C	43.2	NULL	0.933333333	1	1	0.177777778	0.56969697	0.533333333	0.233663465	0.711111111
1379	1388	ST0790	chrIV	+	TATA-less	TAF1-enriched	85	1483752	1483721	-31	ST0790	62.5	NULL	0.061271395	0.932087071	0.357835467	1	0.123046028	0.294801992	0.608498302	0.294801992
1380	1389	YDR524C	chrIV	-	TATA-less	TAF1-enriched	122	1489018	1489057	-39	YDR524C	676.2	NULL	0.030382822	0.664432119	0.344156576	0.892500695	0.929700693	0.49356279	1	0.786265613
1381	1390	YDR524C-B	chrIV	-	TATA-containing	TAF1-depleted	349786	1489746	1489843	-97	YDR524C-B	74438.9	NULL	0.006240605	0.007049543	0.076031041	0.779106125	0.006240605	0.124220661	0.017010283	0.041979528
1382	1391	YDR525W-A	chrIV	+	TATA-less	TAF1-enriched	6217	1490606	1490563	-43	YDR525W-A	3090.6	NULL	0.349393711	0.170447443	0.894523556	0.595883091	0.048783581	1	1	0.188991722
1383	1392	orphan	chrIV	-	TATA-less	TAF1-depleted	72	1493096	1493114	-18	orphan	644	NULL	0.201147528	0.201147528	0.895810367	0.508708087	0.105411524	0.691728538	0.436563363	0.359305232
1384	1393	ST4473	chrIV	-	TATA-less	TAF1-enriched	25	1493984	1493987	-3	ST4473	33.6	NULL	0.104798141	0.013460069	0.895810367	0.895810367	0.931847255	0.14972246	0.072504128	0.792771379
1385	1394	YDR528W	chrIV	+	TATA-containing	TAF1-depleted	100	1494457	1494315	-142	YDR528W	165.8	NULL	0.54363657	0.006740038	0.041310308	0.075059873	0.007154342	0.135857322	0.018934499	0.075059873
1386	1395	YDR529C	chrIV	-	TATA-less	TAF1-enriched	1146	1496539	1496573	-34	YDR529C	3493.8	NULL	1	1	1	1	1	1	1	1
1387	1396	CUT101	chrIV	+	TATA-less	TAF1-enriched	167	1496856	1496839	-17	CUT101	11.9	NULL	0.60913007	0.349393711	0.430614455	0.59928633	0.864665265	0.238557044	0.349393711	0.238557044
1388	1397	YDR530C	chrIV	-	TATA-less	TAF1-enriched	68	1497732	1497883	-151	YDR530C	994	NULL	0.138056172	0.006842389	0.040643643	0.403363637	0.295158623	0.203693596	0.928339172	0.040643643
1389	1398	YDR531W	chrIV	+	TATA-less	TAF1-enriched	73	1498221	1498182	-39	YDR531W	502.1	NULL	0.191490579	0.006842389	1	0.219338776	0.433210667	0.040643643	0.636601633	0.219338776
1390	1399	YDR532C	chrIV	-	TATA-less	TAF1-depleted	26	1500546	1500588	-42	YDR532C	143.5	NULL	0.069469265	0.340778614	0.345717816	0.889235607	0.193119366	0.345717816	0.16585666	0.345717816
1391	1400	YDR533C	chrIV	-	TATA-containing	TAF1-depleted	2053	1502040	1502206	-166	YDR533C	231	NULL	1	0.394066029	0.036701192	0.576150122	0.596577576	0.203693596	0.61251428	0.036701192
1392	1401	YDR534C	chrIV	-	TATA-less	TAF1-enriched	16	1504845	1504922	-77	YDR534C	2.3	NULL	0.065063707	0.019451033	0.845078498	0.533829422	0.389284273	0.078642897	0.458664172	0.845078498
1393	1402	ST4481	chrIV	-	TATA-containing	TAF1-enriched	27	1509739	1509791	-52	ST4481	62.4	NULL	1	0.670582894	0.694417686	1	0.550817954	0.694417686	0.932206034	1
1394	1403	YDR539W	chrIV	+	TATA-less	TAF1-depleted	585	1512235	1512054	-181	YDR539W	475.8	NULL	0.071997747	1	0.691728538	0.691728538	0.659135465	1	0.930481276	0.691728538
1395	1404	orphan	chrIV	-	TATA-less	TAF1-enriched	0	1518263	1518289	-26	orphan	0.4	NULL	NA	NaN	NA	NA	NA	NaN	NaN	NaN
1396	1405	ST0803	chrIV	+	TATA-less	TAF1-enriched	21	1521349	1521221	-128	ST0803	112.3	NULL	0.931847255	0.146954165	1	0.210044337	1	0.418961725	0.729506525	0.691728538
1397	1406	ST4485	chrV	-	TATA-less	TAF1-enriched	327	NA	9775	NA	ST4485	113.3	NULL	0.345986525	0.931359902	0.508708087	0.691728538	0.795012172	0.145981945	0.931847255	0.354866599
1398	1407	CUT103	chrV	+	TATA-less	TAF1-enriched	208	10128	9998	-130	CUT103	37.9	NULL	0.145986278	0.551517708	1	0.512610438	0.932206034	0.512610438	0.549408625	0.512610438
1399	1408	YEL072W	chrV	+	TATA-less	TAF1-enriched	239	13675	13652	-23	YEL072W	121.1	NULL	0.549408625	0.007800146	0.291840545	0.511319908	0.441484761	0.237122014	0.232018345	0.894523556
1400	1409	ST4490	chrV	-	TATA-less	TAF1-enriched	257	15736	15878	-142	ST4490	445.8	NULL	0.495394415	0.013624302	0.088675943	0.065915952	0.441484761	0.790882323	0.440673311	1
1401	1410	YEL071W	chrV	+	TATA-containing	TAF1-depleted	5325	16329	16326	-3	YEL071W	1956	NULL	0.1627659	0.011560425	0.133293185	0.193930852	0.018716589	0.403363637	0.214274004	0.040643643
1402	1411	YEL068C	chrV	-	TATA-less	TAF1-enriched	94	25968	25967	1	YEL068C	1722.2	NULL	0.195548026	0.007690497	0.046730149	0.084784996	0.111611768	0.046730149	0.071491579	0.06260547
1403	1412	orphan	chrV	-	TATA-less	TAF1-enriched	13	27207	27222	-15	orphan	6.3	NULL	0.914285714	0.519890552	0.642857143	0.428571429	0.066567966	0.857142857	0.386476231	1
1404	1413	YEL065W	chrV	+	TATA-containing	TAF1-depleted	2151	27731	27627	-104	YEL065W	456.9	NULL	0.007910597	0.07198232	0.210044337	0.354866599	0.02770872	0.508708087	0.537638448	0.105997548
1405	1414	YEL063C	chrV	-	TATA-less	TAF1-depleted	102	33658	33697	-39	YEL063C	992.2	NULL	0.008133895	0.441484761	0.048106828	0.597027084	0.007690497	0.083811901	0.931112271	0.692632784
1406	1415	CUT104	chrV	+	TATA-less	TAF1-enriched	0	34061	34019	-42	CUT104	4.1	NULL	1	0.204284289	0.303483664	0.659215631	0.332316517	0.056006607	0.848394698	0.303483664
1407	1416	YEL062W	chrV	+	TATA-less	TAF1-enriched	786	34430	34394	-36	YEL062W	90.8	NULL	0.795737098	0.119703534	0.894849724	1	0.931847255	0.598161453	0.731370313	0.048798093
1408	1417	YEL061C	chrV	-	TATA-less	TAF1-enriched	41	NA	39630	NA	YEL061C	928.6	NULL	0.006537796	0.337240128	0.040643643	0.780595556	0.012980572	0.040643643	0.927043673	0.040643643
1409	1418	YEL060C	chrV	-	TATA-containing	TAF1-depleted	6096	41962	42008	-46	YEL060C	5846.8	NULL	0.001556573	0.001556573	0.004915802	0.005188608	0.001313653	0.005188608	0.001688186	0.004915802
1410	1419	YEL058W	chrV	+	TATA-less	TAF1-enriched	785	43276	43221	-55	YEL058W	2031.8	NULL	0.203510603	0.006143194	0.478520977	0.035410671	0.077099872	0.035410671	0.045789833	0.035410671
1411	1420	CUT105	chrV	+	TATA-less	TAF1-enriched	11	45229	45177	-52	CUT105	12.6	NULL	0.39159429	1	0.354866599	0.792771379	0.797516299	0.512610438	0.148125677	0.238557044
1412	1421	YEL056W	chrV	+	TATA-less	TAF1-enriched	788	47150	47124	-26	YEL056W	276.8	NULL	0.798561763	0.733196121	0.359305232	0.512610438	1	0.357835467	0.201147528	0.792771379
1413	1423	YEL054C	chrV	-	TATA-less	TAF1-enriched	2501	53199	53245	-46	YEL054C	47235.8	NULL	0.007690497	0.102955624	0.046730149	1	0.009897647	0.232774339	0.290664411	1
1414	1424	YEL053C	chrV	-	TATA-less	TAF1-enriched	10	56152	56164	-12	YEL053C	409.2	NULL	0.731370313	0.008360374	0.895810367	1	1	0.088675943	0.930861941	0.359305232
1415	1425	YEL052W	chrV	+	TATA-less	TAF1-enriched	871	56566	56536	-30	YEL052W	1394.2	NULL	0.931847255	0.049185351	0.888888889	1	0.545100219	0.894849724	0.346843113	0.694417686
1416	1426	YEL051W	chrV	+	TATA-less	TAF1-enriched	881	58382	58331	-51	YEL051W	5793.8	NULL	0.796454389	0.006842389	1	0.046730149	1	0.046730149	0.288844366	1
1417	1427	CUT545	chrV	-	TATA-less	TAF1-depleted	42	59067	59208	-141	CUT545	36	NULL	0.104798141	0.073517488	0.430614455	0.792771379	0.232842047	0.049491231	0.201939802	0.049491231
1418	1428	YEL050C	chrV	-	TATA-less	TAF1-enriched	132	60872	60902	-30	YEL050C	471	NULL	0.006240605	0.006240605	0.375651673	0.550097317	0.467448917	0.03605437	1	0.375651673
1419	1429	orphan	chrV	+	TATA-less	TAF1-enriched	1235	NA	61223	NA	orphan	3603.5	NULL	0.007154342	0.486833797	0.042651237	0.042651237	0.007259955	0.042651237	0.006842389	0.042651237
1420	1430	YEL048C	chrV	-	TATA-less	TAF1-enriched	199	65140	65188	-48	YEL048C	304.4	NULL	0.038364038	0.031291196	0.48620496	0.14472819	0.861741578	0.111611768	0.222804929	0.787615767
1421	1431	YEL047C	chrV	-	TATA-containing	TAF1-enriched	1263	66800	66819	-19	YEL047C	1074	NULL	0.007910597	0.199557256	0.048106828	1	0.008021847	0.504711414	0.484423365	0.047417494
1422	1432	orphan	chrV	+	TATA-containing	TAF1-enriched	0	67175	67139	-36	orphan	17.8	NULL	0.932206034	0.443898466	1	1	0.932206034	0.238557044	0.074024444	0.512610438
1423	1433	orphan	chrV	-	TATA-less	TAF1-enriched	73	67345	67431	-86	orphan	143.2	NULL	1	0.550817954	1	0.266666667	0.808080808	0.533333333	0.048484848	0.088888889
1424	1434	YEL046C	chrV	-	TATA-containing	TAF1-depleted	796746	68885	68894	-9	YEL046C	11993.8	NULL	0.00503917	0.00503917	0.034132951	1	0.005576156	1	0.179870723	0.033499083
1425	1435	YEL044W	chrV	+	TATA-less	TAF1-enriched	331	69810	69737	-73	YEL044W	1543.2	NULL	0.808080808	0.367676768	0.177777778	0.177777778	0.106024499	0.4	1	0.4
1426	1436	YEL043W	chrV	+	TATA-less	TAF1-depleted	99	70494	70337	-157	YEL043W	481	NULL	0.544370146	0.537638448	0.676082741	0.303193256	0.855850327	0.685167447	0.929700693	0.889235607
1427	1437	YEL042W	chrV	+	TATA-less	TAF1-depleted	1280	73679	73644	-35	YEL042W	2196.1	NULL	0.394107149	1	0.049491231	0.357835467	0.008246738	1	0.796096689	0.049491231
1428	1438	orphan	chrV	-	TATA-less	TAF1-enriched	0	77581	77688	-107	orphan	1.7	NULL	0.322238629	0.614962142	0.436385231	0.21386842	0.892738401	0.240525734	0.786457035	NA
1429	1439	YEL040W	chrV	+	TATA-containing	TAF1-depleted	124	78144	78041	-103	YEL040W	8342.9	NULL	0.007154342	0.014760323	0.139679141	0.480085003	0.662108674	0.480085003	0.007154342	0.591208103
1430	1440	YEL038W	chrV	+	TATA-less	TAF1-enriched	342	80467	80443	-24	YEL038W	2685.7	NULL	0.536872054	0.862242032	0.223883771	0.219338776	0.099260737	0.137134544	0.224501127	0.301326595
1431	1441	YEL037C	chrV	-	TATA-less	TAF1-enriched	3301	82728	82762	-34	YEL037C	449.6	NULL	1	0.003061939	0.015494295	0.802587349	0.003261123	0.802587349	0.595883091	0.015975041
1432	1442	YEL036C	chrV	-	TATA-less	TAF1-enriched	5215	84635	84697	-62	YEL036C	509.4	NULL	0.303914253	0.19875925	0.508708087	0.691728538	0.931604881	0.426325543	0.659736375	0.177967426
1433	1443	YEL034W	chrV	+	TATA-less	TAF1-enriched	1587866	85694	85623	-71	YEL034W	60084.3	NULL	0.442292754	0.2645353	0.147232255	0.507386527	0.045989475	0.048798093	0.007154342	0.147232255
1434	1444	tS(AGA)E	chrV	+	TATA-less	-	27	86698	86594	-104	tS(AGA)E	21.1	NULL	0.808080808	0.932206034	0.044444444	0.190345809	0.808080808	0.533333333	0.493101793	0.711111111
1435	1445	YEL032W	chrV	+	TATA-less	TAF1-enriched	3759	86910	86853	-57	YEL032W	1235.7	NULL	0.007366379	0.667270232	0.894194334	1	0.102955624	1	0.089357999	0.206884586
1436	1446	YEL031W	chrV	+	TATA-less	TAF1-enriched	727	90262	90227	-35	YEL031W	3263	NULL	0.001313653	0.128645924	0.004915802	0.080118314	0.001313653	0.004915802	NaN	0.080118314
1437	1447	YEL029C	chrV	-	TATA-less	TAF1-enriched	3077	97835	97861	-26	YEL029C	244.9	NULL	0.02770872	0.086067568	0.792771379	0.238557044	0.19875925	0.238557044	0.033441628	0.507386527
1438	1448	ANT153	chrV	-	TATA-less	TAF1-enriched	48	99432	99457	-25	ANT153	127.2	NULL	0.199557256	0.104184357	1	0.188991722	0.443898466	0.357835467	1	0.188991722
1439	1449	tM(CAU)E	chrV	+	TATA-less	-	1154	100157	100123	-34	tM(CAU)E	35.5	NULL	0.102955624	0.659135465	0.104870291	0.104870291	0.030987496	0.104870291	0.145270893	0.104870291
1440	1450	orphan	chrV	-	TATA-less	TAF1-enriched	0	100157	100427	-270	orphan	47.4	NULL	0.145986278	0.008360374	0.59928633	0.14972246	0.93196748	0.049491231	0.60913007	0.065915952
1441	1451	YEL027W	chrV	+	TATA-less	TAF1-enriched	13159	100759	100706	-53	YEL027W	47693.2	NULL	0.143118038	0.19875925	1	0.184897599	0.727603425	0.288844366	0.346843113	0.508708087
1442	1452	YEL026W	chrV	+	TATA-less	TAF1-depleted	45256	101859	101853	-6	YEL026W	39784.6	NULL	0.006842389	0.052273898	0.040643643	0.040643643	0.006945558	0.040643643	0.006537796	0.040643643
1443	1454	YEL025C	chrV	-	TATA-less	TAF1-enriched	86	106113	106152	-39	YEL025C	256.3	NULL	0.048783581	0.08830911	0.14972246	0.085758003	0.013460069	0.188991722	0.443898466	0.238557044
1444	1455	YEL024W	chrV	+	TATA-less	TAF1-enriched	812	107222	107184	-38	YEL024W	1666.1	NULL	0.106168224	0.00503917	0.083264517	0.413176151	0.00503917	0.034132951	0.632897003	0.177015983
1445	1456	YEL022W	chrV	+	TATA-less	TAF1-enriched	488	111382	111343	-39	YEL022W	1570.8	NULL	0.092458691	0.006240605	0.327935987	0.88846875	0.178179395	0.263552477	0.596577576	0.036701192
1446	1457	YEL020W-A	chrV	+	TATA-containing	TAF1-enriched	1005	117210	117160	-50	YEL020W-A	5440.9	NULL	0.128645924	0.125786425	0.004915802	NaN	0.001688186	0.005188608	NaN	0.080118314
1447	1458	YEL020C-B	chrV	-	TATA-less	TAF1-enriched	1983	117404	117728	-324	YEL020C-B	1069.9	NULL	0.798561763	1	1	1	0.106024499	0.894849724	0.172722365	0.293325574
1448	1459	ST0838	chrV	+	TATA-less	TAF1-enriched	64	118091	117951	-140	ST0838	7.9	NULL	0.394938074	0.307332348	0.4	0.4	0.56969697	0.266666667	0.733646789	1
1449	1460	YEL018W	chrV	+	TATA-less	TAF1-enriched	158	121503	121451	-52	YEL018W	1212.1	NULL	0.020487551	0.607863471	0.792147392	0.1484791	0.071997747	0.356355957	0.086067568	0.084784996
1450	1461	YEL017C-A	chrV	-	TATA-less	TAF1-depleted	7310	122828	122961	-133	YEL017C-A	18082	NULL	0.183229817	0.006338844	0.036701192	1	0.006240605	0.329609605	0.516391788	0.03605437
1451	1462	YEL017W	chrV	+	TATA-less	TAF1-enriched	1147	123698	123628	-70	YEL017W	645.4	NULL	0.195548026	0.140232086	1	0.585130627	0.030987496	0.784889385	0.019153411	1
1452	1463	YEL015W	chrV	+	TATA-less	TAF1-enriched	269	126635	126626	-9	YEL015W	1937.4	NULL	0.01012654	0.128645924	0.004915802	0.005188608	0.125786425	0.004915802	1	NaN
1453	1464	YEL013W	chrV	+	TATA-less	TAF1-enriched	1318	128629	128588	-41	YEL013W	1112	NULL	0.013402944	0.003061939	0.872382973	0.136037128	0.029053086	0.015494295	0.057346852	0.07723562
1454	1465	tQ(UUG)E2	chrV	+	TATA-less	-	52	131251	131228	-23	tQ(UUG)E2	4.7	NULL	0.341654836	0.232842047	0.894849724	0.359305232	0.306482234	0.359305232	0.436563363	0.324723182
1455	1466	orphan	chrV	-	TATA-less	TAF1-enriched	69	131423	131432	-9	orphan	55.4	NULL	0.012022825	0.007259955	0.04332537	0.104870291	0.012178835	0.104870291	0.603331772	0.04332537
1456	1467	YEL012W	chrV	+	TATA-less	TAF1-enriched	194	NA	131636	NA	YEL012W	348.1	NULL	0.201147528	0.033131861	0.894523556	0.693529129	0.930987447	0.693529129	0.200353348	0.291840545
1457	1468	ANT139	chrV	-	TATA-less	TAF1-enriched	1469	135060	135395	-335	ANT139	34.8	NULL	0.147413673	0.074024444	0.049491231	0.088675943	0.232842047	0.114961001	0.033441628	0.049491231
1458	1469	tK(CUU)E1	chrV	+	TATA-less	-	0	NA	135505	NA	tK(CUU)E1	1.5	NULL	1	0.026179197	NA	0.468716582	0.029656556	0.751829634	0.466854271	0.16585666
1459	1470	tR(UCU)E	chrV	-	TATA-less	-	0	138508	138613	-105	tR(UCU)E	1.6	NULL	0.411313792	0.028429536	1	0.411313792	0.805732791	0.27650048	NA	0.805732791
1460	1471	YEL008W	chrV	+	TATA-containing	TAF1-depleted	7	NA	140550	NA	YEL008W	44.7	NULL	0.670582894	0.020939966	0.895810367	0.049491231	0.268767553	0.049491231	0.010570734	0.049491231
1461	1472	YEL008C-A	chrV	-	TATA-less	TAF1-enriched	3604	140708	140840	-132	YEL008C-A	174.3	NULL	0.266236144	0.059456126	0.047417494	0.288844366	0.020939966	0.354866599	0.797164177	0.894849724
1462	1473	YEL007W	chrV	+	TATA-less	TAF1-enriched	32631	NA	141640	NA	YEL007W	1618.1	NULL	0.439858381	1	0.048106828	0.048106828	0.020939966	0.135857322	0.863469774	0.047417494
1463	1474	YEL006W	chrV	+	TATA-containing	TAF1-depleted	400	144312	144270	-42	YEL006W	561.6	NULL	0.007366379	0.007690497	0.893187858	0.226876582	0.080461474	0.226876582	0.521551992	0.079919784
1464	1475	YEL003W	chrV	+	TATA-less	TAF1-enriched	122	148225	148148	-77	YEL003W	1405.8	NULL	0.008133895	0.007154342	0.894523556	0.048798093	0.087748841	0.048106828	0.105411524	0.894194334
1465	1477	YEL002C	chrV	-	TATA-less	TAF1-enriched	1159	150010	150064	-54	YEL002C	7154.2	NULL	0.294266104	0.007366379	0.688967208	0.045361665	0.031595791	1	0.144554389	0.28581287
1466	1478	CUT106	chrV	+	TATA-less	TAF1-enriched	28	150318	150270	-48	CUT106	26.9	NULL	0.550817954	0.670582894	0.694417686	0.14972246	0.086628059	0.14972246	0.670582894	0.694417686
1467	1479	YEL001C	chrV	-	TATA-less	TAF1-enriched	2353	150942	151013	-71	YEL001C	10137.7	NULL	0.015876085	0.169604801	0.046044853	0.045361665	0.012652434	0.045361665	0.070746059	0.046044853
1468	1481	ST4529	chrV	-	TATA-less	TAF1-enriched	32	151845	151851	-6	ST4529	64.7	NULL	0.43573066	0.006945558	0.686130413	0.176565351	0.542158797	0.138408493	0.123311259	0.279641534
1469	1482	CUT547	chrV	-	TATA-less	TAF1-enriched	6	152662	152738	-76	CUT547	4.5	NULL	0.774812202	0.022716702	1	0.056006607	0.339155413	1	0.394014618	0.185839008
1470	1483	YER001W	chrV	+	TATA-containing	TAF1-depleted	328	153466	153474	8	YER001W	540	NULL	0.549408625	0.016639137	0.112729874	0.147232255	0.797866593	0.086730865	0.121711196	0.145981945
1471	1484	ST4532	chrV	-	TATA-containing	TAF1-enriched	0	NA	156467	NA	ST4532	112.8	NULL	0.609758799	0.040828988	0.190345809	0.888888889	0.931847255	1	0.864900617	0.793389781
1472	1485	YER002W	chrV	+	TATA-less	TAF1-enriched	490	156805	156754	-51	YER002W	639.2	NULL	0.001688186	NaN	0.004915802	NaN	0.001556573	NaN	NaN	0.080118314
1473	1486	YER003C	chrV	-	TATA-less	TAF1-enriched	1123	159114	159152	-38	YER003C	5175.6	NULL	0.128645924	0.050186187	0.080118314	NaN	0.215924939	NaN	NaN	0.080118314
1474	1487	YER004W	chrV	+	TATA-less	TAF1-enriched	8959	159592	159572	-20	YER004W	2914.7	NULL	0.06745128	0.585769293	0.046044853	0.424874689	0.006842389	0.594729336	0.146148201	0.208468351
1475	1488	YER005W	chrV	+	TATA-less	TAF1-depleted	963	160548	160506	-42	YER005W	106.7	NULL	0.367676768	0.460606061	0.116073943	0.044444444	0.367676768	0.533333333	0.808080808	0.266666667
1476	1489	ST4534	chrV	-	TATA-less	TAF1-enriched	465	162413	162446	-33	ST4534	41.8	NULL	1	0.930608862	0.234230702	0.895810367	0.122378978	0.234230702	0.72903449	0.790882323
1477	1490	YER006W	chrV	+	TATA-less	TAF1-enriched	4224	162736	162696	-40	YER006W	3788.9	NULL	0.083769261	0.01766476	0.299445905	0.104329469	0.524902502	0.871798602	0.358771893	0.026183688
1478	1491	YER007C-A	chrV	-	TATA-less	TAF1-enriched	2743	166855	166910	-55	YER007C-A	1311.8	NULL	0.129595844	0.001313653	0.005188608	NaN	1	NaN	0.215924939	0.080118314
1479	1492	orphan	chrV	-	TATA-containing	TAF1-depleted	47382	167561	167586	-25	orphan	45213.2	NULL	0.491556101	0.008021847	0.048106828	0.047417494	0.007690497	0.047417494	0.049185351	0.048106828
1480	1493	orphan	chrV	+	TATA-less	TAF1-enriched	15	167868	167847	-21	orphan	10.8	NULL	0.733646789	0.307332348	0.711111111	0.888888889	0.109090909	0.088888889	0.048484848	0.4
1481	1494	YER008C	chrV	-	TATA-less	TAF1-enriched	126	171832	171875	-43	YER008C	128.8	NULL	0.032207629	0.008246738	0.792147392	0.792147392	0.797516299	0.594729336	0.008246738	0.232774339
1482	1495	YER010C	chrV	-	TATA-less	TAF1-enriched	581	173147	173306	-159	YER010C	1365.7	NULL	0.793910167	0.006842389	0.17090352	0.042651237	0.135870597	0.301326595	0.07136402	1
1483	1496	YER011W	chrV	+	TATA-containing	TAF1-depleted	368	175326	175194	-132	YER011W	381	NULL	0.551517708	0.268767553	0.512610438	1	0.670582894	0.359305232	1	0.049491231
1484	1497	tE(UUC)E1	chrV	+	TATA-less	-	743	177119	177087	-32	tE(UUC)E1	70.1	NULL	0.263552477	0.595883091	0.015975041	0.802587349	0.146100466	0.802587349	0.595883091	0.036777943
1485	1498	ST4539	chrV	-	TATA-less	TAF1-enriched	123	177542	177580	-38	ST4539	371.8	NULL	0.173477636	0.387337939	0.694417686	0.294801992	0.008080808	0.088888889	0.104184357	0.600401848
1486	1499	YER012W	chrV	+	TATA-less	TAF1-enriched	358	NA	177823	NA	YER012W	5527.3	NULL	0.123046028	0.049990741	1	0.06674615	0.007366379	0.06674615	0.087748841	0.088888889
1487	1500	CUT550	chrV	-	TATA-less	TAF1-enriched	130	178394	178485	-91	CUT550	111.4	NULL	0.093697659	0.048302951	0.125525756	1	0.183229817	0.093532513	0.237688686	0.141326003
1488	1501	YER013W	chrV	+	TATA-less	TAF1-enriched	88	178833	178823	-10	YER013W	119.4	NULL	0.008133895	0.032822933	0.598161453	0.353367292	1	0.895493084	0.020487551	0.693529129
1489	1502	YER015W	chrV	+	TATA-less	TAF1-enriched	99	184511	184468	-43	YER015W	168.4	NULL	0.007690497	0.658531366	0.046044853	0.506054349	0.432363287	0.501992689	0.789711992	0.893187858
1490	1503	ST4541	chrV	-	TATA-less	TAF1-enriched	45	188031	188074	-43	ST4541	66.2	NULL	0.141677259	0.081022014	0.04332537	0.676082741	0.068964333	0.079919784	0.649067094	0.04332537
1491	1504	YER016W	chrV	+	TATA-less	TAF1-enriched	223	188309	188252	-57	YER016W	943.3	NULL	0.097408871	0.045989475	1	0.342584628	0.223654208	0.342584628	0.185728553	1
1492	1505	YER017C	chrV	-	TATA-less	TAF1-depleted	937	191814	191869	-55	YER017C	285.2	NULL	0.128517609	0.547269697	0.68989587	0.415937626	0.07486129	0.206884586	0.93148272	0.206884586
1493	1506	YER019W	chrV	+	TATA-less	TAF1-depleted	77	192337	192372	35	YER019W	331.3	NULL	0.394938074	0.545100219	0.266666667	0.793389781	0.109090909	0.711111111	0.864900617	0.711111111
1494	1507	YER018C	chrV	-	TATA-less	TAF1-enriched	949	192569	192679	-110	YER018C	148.2	NULL	0.393272891	0.796810213	0.083811901	1	0.30562919	0.357835467	0.30562919	0.693529129
1495	1508	orphan	chrV	+	TATA-less	TAF1-enriched	315	192887	192851	-36	orphan	565	NULL	0.014384847	0.91124672	0.659023837	0.576150122	0.086897904	0.576150122	0.360765351	1
1496	1509	YER019C-A	chrV	-	TATA-less	TAF1-enriched	2382	194549	194591	-42	YER019C-A	3026.9	NULL	0.016832249	0.071491579	0.048798093	0.357835467	0.008133895	0.894523556	0.267082584	0.048798093
1497	1510	YER020W	chrV	+	TATA-containing	TAF1-depleted	1641	195286	195109	-177	YER020W	802.9	NULL	0.007800146	0.242343195	0.045361665	0.132006336	0.439858381	0.080892654	0.026258184	0.046044853
1498	1511	YER021W	chrV	+	TATA-less	TAF1-enriched	1597	196981	196891	-90	YER021W	2982.7	NULL	0.007690497	0.2645353	0.083811901	0.789593876	0.121711196	0.501992689	0.436563363	1
1499	1512	YER022W	chrV	+	TATA-less	TAF1-enriched	69	198831	198793	-38	YER022W	110.9	NULL	0.087748841	0.087748841	0.895493084	0.693529129	0.347696494	0.048106828	0.663855746	1
1500	1513	YER023W	chrV	+	TATA-less	TAF1-enriched	3373	201088	201043	-45	YER023W	996.6	NULL	0.303052329	0.603988754	0.228361945	0.426325543	0.729976105	1	0.260236203	0.228361945
1501	1514	orphan	chrV	+	TATA-less	TAF1-enriched	159	202889	202840	-49	orphan	198.7	NULL	1	0.008021847	0.356355957	0.231310785	0.487629882	0.113846298	0.603988754	0.237122014
1502	1516	ANT142	chrV	-	TATA-less	TAF1-enriched	97	204568	204597	-29	ANT142	30.5	NULL	0.021396137	0.008246738	1	0.1484791	0.550817954	0.048798093	0.008246738	0.693529129
1503	1517	YER025W	chrV	+	TATA-less	TAF1-enriched	11937	205246	205215	-31	YER025W	10356.2	NULL	0.41827846	0.53915997	0.09467072	0.295641821	0.041828847	0.339408154	0.035577182	0.671784971
1504	1518	YER026C	chrV	-	TATA-containing	TAF1-depleted	1228	208523	208494	29	YER026C	7198.3	NULL	0.007154342	0.006240605	0.042651237	1	0.331829403	0.057677444	0.859683795	0.888854163
1505	1519	YER027C	chrV	-	TATA-less	TAF1-enriched	265	210271	210311	-40	YER027C	904	NULL	0.193930852	0.007259955	0.344156576	0.67502412	0.193930852	0.339408154	0.929300411	0.344156576
1506	1520	YER028C	chrV	-	TATA-containing	TAF1-depleted	191	211772	211944	-172	YER028C	27.9	NULL	1	0.072727273	0.533333333	0.088888889	0.367676768	0.600401848	0.932087071	0.533333333
1507	1521	YER029C	chrV	-	TATA-less	TAF1-enriched	185	213193	213225	-32	YER029C	337.6	NULL	0.001733589	0.129595844	0.004915802	0.080118314	0.001688186	0.080118314	NaN	0.004915802
1508	1522	YER031C	chrV	-	TATA-less	TAF1-enriched	1341	214733	214783	-50	YER031C	1632.8	NULL	0.019373319	0.007259955	0.137134544	0.057677444	0.019153411	0.042651237	0.66269405	0.342584628
1509	1523	YER032W	chrV	+	TATA-less	TAF1-enriched	281	215031	215004	-27	YER032W	203.6	NULL	0.550114935	0.049587742	0.344156576	0.790241066	0.093697659	0.790241066	0.345126713	0.237122014
1510	1524	YER033C	chrV	-	TATA-less	TAF1-enriched	207	221474	221547	-73	YER033C	87	NULL	0.796810213	0.542899463	0.1484791	1	0.932087071	1	0.931236421	0.894523556
1511	1525	YER035W	chrV	+	TATA-less	TAF1-depleted	3100	222654	222648	-6	YER035W	2207	NULL	0.348546687	0.068964333	1	0.894194334	1	0.507386527	0.390749904	0.048106828
1512	1526	CUT551	chrV	-	TATA-containing	TAF1-enriched	131	222998	223126	-128	CUT551	59.7	NULL	0.02741654	0.100493741	0.344156576	0.210044337	0.297817462	0.042651237	0.428069831	0.138408493
1513	1527	YER036C	chrV	-	TATA-containing	TAF1-enriched	7362	225229	225245	-16	YER036C	4954.6	NULL	0.001733589	0.129595844	0.080118314	NaN	0.01012654	0.080118314	NaN	NaN
1514	1528	YER039C	chrV	-	TATA-less	TAF1-enriched	94	229475	229498	-23	YER039C	189.5	NULL	0.005919951	0.007742424	0.015494295	0.263552477	0.007742424	0.015494295	0.544329484	0.802587349
1515	1529	YER040W	chrV	+	TATA-less	TAF1-enriched	6555	229753	229713	-40	YER040W	202	NULL	0.007910597	0.04838244	0.484695003	0.894523556	0.063932568	0.143471009	0.288844366	0.424874689
1516	1530	orphan	chrV	+	TATA-less	TAF1-enriched	15	234648	234593	-55	orphan	4.5	NULL	0.659736375	0.266236144	1	1	0.603988754	0.691728538	0.929832618	1
1517	1531	YER042W	chrV	+	TATA-containing	TAF1-enriched	121	234922	234909	-13	YER042W	941.3	NULL	0.007800146	0.007910597	0.14472819	0.226876582	0.102955624	0.183522244	0.168923242	0.279641534
1518	1532	YER043C	chrV	-	TATA-less	TAF1-enriched	51788	237139	237148	-9	YER043C	29049	NULL	0.013328329	0.155478268	0.872382973	0.872382973	0.217300922	0.239316541	0.686075935	0.872382973
1519	1533	YER044C	chrV	-	TATA-containing	TAF1-depleted	1469	237930	238070	-140	YER044C	2940.2	NULL	0.091838902	0.065817128	0.322843128	0.780595556	0.029482772	0.888854163	0.929700693	0.076031041
1520	1534	CUT109	chrV	+	TATA-less	TAF1-enriched	240	238640	238612	-28	CUT109	16.2	NULL	0.214141414	0.63030303	0.4	0.711111111	1	1	0.682828283	0.4
1521	1535	orphan	chrV	-	TATA-less	TAF1-enriched	844	241578	241652	-74	orphan	595.5	NULL	0.006326683	0.004952607	0.03871668	0.027362545	0.069511238	0.027362545	0.91124672	0.027362545
1522	1536	orphan	chrV	+	TATA-less	TAF1-enriched	77	242550	242506	-44	orphan	146.2	NULL	0.201939802	0.798215076	0.293325574	0.049491231	0.147413673	0.894849724	0.667829275	0.049491231
1523	1537	ST4562	chrV	-	TATA-less	TAF1-enriched	168	242778	242831	-53	ST4562	10.2	NULL	0.56969697	0.933333333	0.044444444	0.533333333	0.56969697	0.533333333	0.307332348	0.711111111
1524	1538	YER047C	chrV	-	TATA-less	TAF1-enriched	33	246667	246694	-27	YER047C	43	NULL	0.033441628	0.394107149	0.14972246	0.359305232	0.93196748	0.59928633	0.670582894	0.14972246
1525	1539	YER048C	chrV	-	TATA-less	TAF1-enriched	127	248223	248231	-8	YER048C	2555.2	NULL	0.128645924	0.001556573	0.005188608	0.005188608	0.001313653	0.080118314	0.01012654	0.005188608
1526	1540	orphan	chrV	+	TATA-less	TAF1-enriched	0	249939	249875	-64	orphan	1.1	NULL	0.563702862	0.504985075	0.414216178	NaN	0.414216178	0.248213079	NaN	NaN
1527	1541	YER048W-A	chrV	+	TATA-less	TAF1-depleted	937	250687	250637	-50	YER048W-A	2760.8	NULL	0.004133256	0.010733416	0.027362545	0.02677094	0.004614763	0.02677094	1	0.027362545
1528	1542	orphan	chrV	-	TATA-less	TAF1-enriched	12	251384	251402	-18	orphan	1.3	NULL	0.040833126	0.191266987	0.805732791	1	0.359012054	0.692632784	0.270289385	0.692632784
1529	1543	YER049W	chrV	+	TATA-less	TAF1-enriched	1060	251660	251642	-18	YER049W	1462	NULL	0.007259955	0.099260737	0.344156576	0.301326595	0.192305942	0.301326595	0.64707823	0.684195574
1530	1544	YER050C	chrV	-	TATA-less	TAF1-enriched	198	254408	254446	-38	YER050C	1799.5	NULL	0.001688186	0.001556573	0.004915802	0.005188608	0.001313653	0.005188608	0.01012654	0.004915802
1531	1545	YER051W	chrV	+	TATA-less	TAF1-enriched	100	254692	254643	-49	YER051W	100.2	NULL	0.006842389	0.097408871	0.344156576	1	0.536872054	0.273321678	0.224501127	0.124220661
1532	1546	YER052C	chrV	-	TATA-containing	TAF1-depleted	7028	258027	258053	-26	YER052C	1999.9	NULL	0.049990741	0.609758799	0.14972246	0.600401848	0.032514852	0.116073943	0.040828988	0.049491231
1533	1547	YER053C	chrV	-	TATA-less	TAF1-depleted	177	259582	259737	-155	YER053C	3607.3	NULL	0.785246408	0.004782003	0.02677094	0.573775404	0.004697962	0.146399099	0.146100466	0.02677094
1534	1548	CUT110	chrV	+	TATA-less	TAF1-enriched	578	262012	261985	-27	CUT110	80.7	NULL	0.931604881	0.145270893	0.049491231	0.894849724	0.443898466	0.508708087	0.863951761	0.049491231
1535	1549	YER055C	chrV	-	TATA-containing	TAF1-depleted	3123	265640	265811	-171	YER055C	3884.9	NULL	0.004952607	1	0.027362545	0.027362545	0.054872606	0.027362545	0.525729278	0.02677094
1536	1550	YER056C	chrV	-	TATA-containing	TAF1-depleted	2935	268046	268200	-154	YER056C	1500.9	NULL	0.016446959	0.102340692	0.143471009	0.048106828	0.012652434	0.048106828	0.045593068	0.112729874
1537	1551	ST0889	chrV	+	TATA-less	TAF1-enriched	32	269040	268933	-107	ST0889	485	NULL	0.147413673	0.008246738	1	0.792771379	1	0.356355957	0.864665265	0.238557044
1538	1552	CUT554	chrV	-	TATA-containing	TAF1-enriched	259	269257	269288	-31	CUT554	552.4	NULL	0.008360374	0.008360374	0.14972246	0.049491231	0.670582894	0.049491231	0.932206034	0.188991722
1539	1553	orphan	chrV	+	TATA-less	TAF1-enriched	4	270152	270059	-93	orphan	2.5	NULL	0.079937838	0.071997747	0.167981858	0.354866599	0.180559006	0.085758003	1	0.085758003
1540	1554	YER056C-A	chrV	-	TATA-less	TAF1-enriched	97206	NA	270203	NA	YER056C-A	38654.2	NULL	0.128645924	0.001556573	1	NaN	1	0.080118314	NaN	NaN
1541	1555	ST0890	chrV	+	TATA-less	TAF1-enriched	117	270695	270693	-2	ST0890	32.4	NULL	0.074024444	0.60913007	0.59928633	0.359305232	0.441484761	0.792771379	0.125042727	0.694417686
1542	1556	YER057C	chrV	-	TATA-less	TAF1-depleted	30503	271147	271169	-22	YER057C	4310.7	NULL	0.006740038	0.006143194	0.041310308	0.041979528	0.006143194	0.041310308	0.016801723	0.041310308
1543	1557	YER058W	chrV	+	TATA-less	TAF1-enriched	112	271763	271736	-27	YER058W	217	NULL	0.261101437	0.093697659	0.329609605	0.892845929	0.224501127	0.892845929	0.173916672	0.329609605
1544	1558	CUT555	chrV	-	TATA-less	TAF1-enriched	94	272062	272140	-78	CUT555	3.7	NULL	0.050394337	0.349393711	0.088888889	0.4	0.682828283	0.533333333	0.460606061	0.711111111
1545	1559	YER059W	chrV	+	TATA-less	TAF1-enriched	655	272506	272463	-43	YER059W	418	NULL	0.103570182	0.798561763	0.59928633	0.065915952	0.232842047	0.084784996	0.303914253	0.188991722
1546	1560	YER060W	chrV	+	TATA-containing	TAF1-enriched	130	274473	274471	-2	YER060W	382.1	NULL	0.008246738	0.049587742	0.1484791	0.693529129	0.608498302	0.048798093	0.487629882	0.690816272
1547	1561	YER061C	chrV	-	TATA-less	TAF1-enriched	88	279423	279597	-174	YER061C	669.3	NULL	0.01249777	0.024608672	0.092176992	0.573775404	0.018163018	0.573775404	1	0.092176992
1548	1562	YER062C	chrV	-	TATA-containing	TAF1-enriched	1065	280836	280823	13	YER062C	2298	NULL	1	0.006240605	0.112351198	0.283876475	0.183229817	0.329609605	0.12002519	0.283876475
1549	1563	orphan	chrV	+	TATA-less	TAF1-enriched	13	281351	281251	-100	orphan	16.9	NULL	0.282828283	0.798561763	0.044444444	0.088888889	1	1	0.016161616	0.711111111
1550	1564	orphan	chrV	-	TATA-less	TAF1-enriched	172	281351	281354	-3	orphan	16.6	NULL	0.931847255	0.733646789	1	0.600401848	0.443097314	0.4	1	1
1551	1565	YER063W	chrV	+	TATA-less	TAF1-enriched	1488	281828	281647	-181	YER063W	1749	NULL	0.007259955	0.045593068	0.042651237	0.301326595	0.007259955	0.124220661	0.173058229	0.137134544
1552	1566	YER064C	chrV	-	TATA-containing	TAF1-depleted	311	284221	284312	-91	YER064C	698.4	NULL	0.195548026	0.540666674	0.046044853	0.046044853	0.007690497	0.046044853	0.069974467	0.415937626
1553	1567	YER065C	chrV	-	TATA-less	TAF1-depleted	410	287143	287245	-102	YER065C	97.1	NULL	0.602007974	0.1627659	1	0.342584628	0.595883091	1	0.924556048	0.22538387
1554	1568	tS(UGA)E	chrV	-	TATA-containing	-	90	288493	288531	-38	tS(UGA)E	53.1	NULL	0.186557552	0.186557552	0.137134544	0.685167447	0.796096689	0.685167447	0.795012172	0.685167447
1555	1569	orphan	chrV	+	TATA-less	TAF1-enriched	94	289382	289350	-32	orphan	47.4	NULL	0.603331772	0.059003394	0.234230702	0.235679913	0.262823761	0.694417686	0.163540852	0.14972246
1556	1570	YER068W	chrV	+	TATA-less	TAF1-enriched	402	292972	292950	-22	YER068W	439.1	NULL	0.104798141	0.19875925	0.14972246	0.065915952	0.171965576	0.114961001	0.303052329	0.048798093
1557	1571	YER069W	chrV	+	TATA-less	TAF1-depleted	686	295468	295400	-68	YER069W	161.8	NULL	0.04128299	0.042059394	0.657788651	0.377494259	1	0.377494259	0.738078947	0.657788651
1558	1572	YER070W	chrV	+	TATA-containing	TAF1-depleted	3031	298915	298882	-33	YER070W	1648	NULL	0.042839137	0.006240605	0.329609605	0.112351198	0.185728553	0.112351198	0.032993937	0.329609605
1559	1573	CUT559	chrV	-	TATA-less	TAF1-enriched	8	301574	301664	-90	CUT559	19.8	NULL	0.367676768	0.394938074	0.266666667	0.888888889	0.56969697	0.694417686	1	0.4
1560	1574	YER071C	chrV	-	TATA-less	TAF1-enriched	130	302145	302291	-146	YER071C	466.7	NULL	0.931726391	0.017219911	0.512610438	0.049491231	0.492330692	0.048798093	0.008360374	0.694417686
1561	1575	orphan	chrV	-	TATA-less	TAF1-depleted	46	302295	302472	-177	orphan	342.4	NULL	0.49463363	0.007154342	1	0.048106828	0.863711407	0.048798093	0.008246738	0.424874689
1562	1576	YER072W	chrV	+	TATA-less	TAF1-depleted	50416	302790	302771	-19	YER072W	19075.9	NULL	0.006740038	0.006842389	1	0.273321678	0.006842389	0.273321678	0.016387834	1
1563	1577	CUT561	chrV	-	TATA-containing	TAF1-enriched	49	303096	303333	-237	CUT561	300.2	NULL	0.537638448	0.007366379	0.104870291	0.058495155	0.006945558	0.04332537	0.09307828	0.079919784
1564	1578	orphan	chrV	-	TATA-less	TAF1-enriched	15	303567	303652	-85	orphan	18.5	NULL	0.008360374	0.232842047	0.895810367	1	0.073517488	0.512610438	0.229533472	0.59928633
1565	1579	YER073W	chrV	+	TATA-containing	TAF1-depleted	1126	304025	303952	-73	YER073W	593.6	NULL	0.93196748	0.102955624	1	0.357835467	0.347696494	0.693529129	0.265387054	0.895493084
1566	1580	orphan	chrV	+	TATA-containing	TAF1-enriched	15	306022	305950	-72	orphan	3.2	NULL	0.914061959	0.914061959	NA	1	0.449177202	1	0.441360784	0.866844726
1567	1581	YER074W	chrV	+	TATA-less	TAF1-enriched	1051	306325	306285	-40	YER074W	1186	NULL	0.012812142	0.007690497	1	0.083811901	0.484423365	0.048106828	0.795375598	0.135857322
1568	1582	YER074W-A	chrV	+	TATA-less	TAF1-enriched	545	307666	307615	-51	YER074W-A	2209.2	NULL	0.006338844	0.088116673	0.03605437	0.283876475	0.006240605	0.665005542	0.487856663	0.329609605
1569	1583	YER075C	chrV	-	TATA-less	TAF1-depleted	7332	311174	311343	-169	YER075C	111.9	NULL	0.932206034	0.864665265	0.049491231	0.049491231	0.670582894	0.694417686	0.201939802	0.238557044
1570	1584	YER076C	chrV	-	TATA-less	TAF1-enriched	57	313417	313658	-241	YER076C	97.2	NULL	0.733646789	0.933333333	0.888888889	0.895493084	0.731830274	0.693529129	0.864900617	0.894849724
1571	1585	orphan	chrV	-	TATA-less	TAF1-enriched	6	313680	313976	-296	orphan	85.8	NULL	0.488422317	0.006945558	0.892845929	0.889235607	0.006338844	0.104870291	0.790104282	0.889235607
1572	1586	YER077C	chrV	-	TATA-less	TAF1-enriched	136	316502	316547	-45	YER077C	98.9	NULL	1	0.045197383	0.104870291	0.424874689	0.376759118	0.424874689	0.727121344	1
1573	1587	CUT111	chrV	+	TATA-less	TAF1-enriched	10	316874	316760	-114	CUT111	17.2	NULL	0.729506525	0.682828283	1	1	0.808080808	0.266666667	0.932087071	0.600401848
1574	1588	YER078W-A	chrV	+	TATA-less	TAF1-enriched	28	318676	318575	-101	YER078W-A	4	NULL	0.260486041	1	0.512610438	0.238557044	0.932206034	0.694417686	0.394107149	0.895810367
1575	1589	YER079W	chrV	+	TATA-less	TAF1-depleted	177	318955	318843	-112	YER079W	248.9	NULL	0.007581651	0.047582097	0.081865671	1	0.020038949	0.172327006	0.482797645	1
1576	1590	YER080W	chrV	+	TATA-less	TAF1-enriched	1174	319966	319932	-34	YER080W	2195.2	NULL	0.005855932	0.005303894	0.554772097	0.112351198	0.72367361	0.03605437	0.022072114	0.419740503
1577	1591	CUT563	chrV	-	TATA-less	TAF1-enriched	19	321764	321840	-76	CUT563	52.2	NULL	0.306482234	1	0.512610438	0.508708087	0.495394415	0.792771379	0.797866593	0.14972246
1578	1592	orphan	chrV	+	TATA-containing	TAF1-depleted	180	322211	322213	2	orphan	2597.8	NULL	0.001643552	0.001643552	0.004915802	0.004915802	0.001313653	0.005188608	0.001313653	0.004915802
1579	1593	YER081W	chrV	+	TATA-containing	TAF1-depleted	401	322778	322659	-119	YER081W	656.1	NULL	0.006945558	0.045197383	0.046730149	0.14472819	0.020487551	0.14472819	0.668385514	0.046730149
1580	1594	YER082C	chrV	-	TATA-containing	TAF1-enriched	364	325933	325976	-43	YER082C	1097.4	NULL	0.330915337	0.005303894	0.419740503	0.092393564	0.855850327	0.065390823	0.464757447	0.156375722
1581	1595	CUT112	chrV	+	TATA-less	TAF1-enriched	0	326249	326223	-26	CUT112	15.1	NULL	0.008246738	0.049185351	0.237122014	0.237122014	0.008133895	0.065086726	0.124377909	0.14472819
1582	1596	YER083C	chrV	-	TATA-less	TAF1-enriched	5123	327010	327052	-42	YER083C	4560	NULL	0.004133256	0.004133256	0.767755389	0.576150122	0.004614763	0.02677094	0.91124672	0.178744044
1583	1597	YER086W	chrV	+	TATA-less	TAF1-enriched	358	328441	328413	-28	YER086W	1666.6	NULL	0.007921805	0.004866885	0.026183688	0.623433341	0.012315703	0.573775404	0.358326467	0.026183688
1584	1598	YER087W	chrV	+	TATA-less	TAF1-enriched	218	330538	330520	-18	YER087W	99.5	NULL	0.931847255	0.148125677	0.790882323	0.345717816	0.443898466	0.048798093	1	1
1585	1599	YER087C-B	chrV	-	TATA-less	TAF1-enriched	36617	332831	332873	-42	YER087C-B	670.7	NULL	0.019373319	0.140232086	0.342584628	0.219338776	0.138056172	0.042651237	0.316764504	0.415937626
1586	1600	YER088C	chrV	-	TATA-less	TAF1-enriched	36973	335165	335246	-81	YER088C	323	NULL	0.201939802	0.105411524	0.049491231	0.430614455	0.008360374	0.895810367	0.349393711	0.048798093
1587	1601	YER089C	chrV	-	TATA-less	TAF1-enriched	2953	337601	337657	-56	YER089C	10818.4	NULL	0.004782003	0.004614763	0.02677094	0.03871668	0.004133256	0.104329469	0.245278117	0.03871668
1588	1602	YER090W	chrV	+	TATA-less	TAF1-enriched	19803	337918	337878	-40	YER090W	2245.5	NULL	0.015775183	0.788521794	0.077974734	0.044001861	0.015775183	0.044680647	0.528994074	0.274915837
1589	1603	YER091C	chrV	-	TATA-containing	TAF1-depleted	2036	342149	342237	-88	YER091C	5729.6	NULL	0.002685983	0.595883091	0.802587349	0.802587349	0.057346852	0.802587349	0.595883091	0.015975041
1590	1604	YER092W	chrV	+	TATA-less	TAF1-enriched	843	342903	342851	-52	YER092W	1372.6	NULL	0.529799874	0.005855932	0.03605437	0.419740503	0.006240605	0.065390823	0.446725215	0.035410671
1591	1605	YER093C	chrV	-	TATA-less	TAF1-enriched	859	347632	347654	-22	YER093C	408.8	NULL	0.00924624	0.007366379	0.042651237	0.303193256	0.099877403	0.494997202	0.447719307	0.786943898
1592	1606	orphan	chrV	-	TATA-less	TAF1-enriched	279	348391	348413	-22	orphan	946.3	NULL	0.006240605	0.169604801	0.03605437	0.329609605	0.005393812	0.112351198	0.12002519	0.036701192
1593	1607	YER094C	chrV	-	TATA-less	TAF1-enriched	2538	349397	349436	-39	YER094C	4314.1	NULL	0.007910597	0.007910597	0.046730149	0.234230702	0.229533472	0.145981945	0.603331772	0.047417494
1594	1608	orphan	chrV	+	TATA-less	TAF1-enriched	18	353757	353731	-26	orphan	17.2	NULL	0.56969697	0.199557256	0.4	0.4	0.808080808	0.888888889	0.201939802	1
1595	1609	tE(UUC)E2	chrV	+	TATA-less	-	3871	354937	354923	-14	tE(UUC)E2	285.8	NULL	0.393035392	0.781373283	0.779106125	0.301326595	0.715823013	0.67502412	0.781373283	0.779106125
1596	1610	YER100W	chrV	+	TATA-less	TAF1-enriched	625	359550	359285	-265	YER100W	88.4	NULL	0.010164302	0.006945558	0.111611768	0.14472819	0.047582097	0.14472819	0.488422317	0.892500695
1597	1611	YER101C	chrV	-	TATA-less	TAF1-enriched	231	361785	361830	-45	YER101C	253.4	NULL	0.040120865	0.124377909	0.511319908	0.1484791	0.443097314	0.237122014	0.393272891	0.147232255
1598	1612	orphan	chrV	-	TATA-less	TAF1-enriched	16	362014	362158	-144	orphan	20.8	NULL	0.443898466	0.733196121	0.14972246	0.359305232	0.147413673	1	0.550817954	1
1599	1613	YER102W	chrV	+	TATA-less	TAF1-enriched	233	362761	362700	-61	YER102W	1165.7	NULL	0.069511238	0.007473611	0.412866955	0.044680647	0.069511238	0.044680647	0.061930587	0.585130627
1600	1614	YER103W	chrV	+	TATA-less	TAF1-depleted	82	364445	364409	-36	YER103W	1653	NULL	0.006842389	0.069511238	0.577468662	0.120288243	0.47782784	0.039979603	0.005950856	0.577468662
1601	1615	YER104W	chrV	+	TATA-less	TAF1-enriched	221	366817	366778	-39	YER104W	447.5	NULL	0.123712341	0.608498302	1	0.137134544	0.330915337	0.048798093	0.297817462	0.506054349
1602	1616	YER105C	chrV	-	TATA-less	TAF1-enriched	472	371997	372034	-37	YER105C	1598.5	NULL	0.001688186	0.050186187	0.004915802	NaN	0.001313653	0.005188608	NaN	NaN
1603	1617	YER109C	chrV	-	TATA-less	TAF1-enriched	79	377749	377782	-33	YER109C	280.2	NULL	0.008246738	0.19875925	0.235679913	0.065915952	0.008246738	0.088675943	0.032822933	0.048798093
1604	1618	YER110C	chrV	-	TATA-less	TAF1-enriched	13594	382187	382215	-28	YER110C	4506.4	NULL	0.006240605	0.006143194	0.871798602	0.03605437	0.393035392	0.03605437	0.35985058	0.035410671
1605	1619	YER111C	chrV	-	TATA-less	TAF1-enriched	89	386012	386130	-118	YER111C	190.4	NULL	0.201147528	0.931604881	0.693529129	0.065086726	0.796810213	0.048798093	0.199557256	0.087703529
1606	1620	YER112W	chrV	+	TATA-less	TAF1-enriched	219	387369	387191	-178	YER112W	2806.6	NULL	0.001313653	0.001313653	NaN	NaN	0.215924939	0.080118314	NaN	NaN
1607	1621	YER113C	chrV	-	TATA-less	TAF1-depleted	353	389980	390132	-152	YER113C	262.5	NULL	0.020487551	0.439858381	0.237122014	0.344156576	0.146700539	0.353367292	1	0.183522244
1608	1622	YER114C	chrV	-	TATA-less	TAF1-enriched	1264	393964	393976	-12	YER114C	408	NULL	0.007910597	0.329076491	0.047417494	0.288844366	0.007581651	0.231310785	0.388196138	0.210044337
1609	1623	CUT115	chrV	+	TATA-less	TAF1-enriched	24	395308	395254	-54	CUT115	6.1	NULL	1	0.63030303	0.533333333	0.888888889	0.775757576	1	0.808080808	0.222222222
1610	1624	YER116C	chrV	-	TATA-less	TAF1-enriched	69	396228	396271	-43	YER116C	321.3	NULL	0.003261123	0.003193895	0.015975041	0.136037128	0.003193895	0.015975041	0.191694602	0.015975041
1611	1625	YER117W	chrV	+	TATA-less	TAF1-enriched	8970	396790	396741	-49	YER117W	19052.3	NULL	0.005855932	0.00503917	0.550097317	0.034132951	1	0.034132951	0.005576156	0.413176151
1612	1626	YER118C	chrV	-	TATA-containing	TAF1-enriched	629	399196	399232	-36	YER118C	230.3	NULL	0.008133895	0.007154342	0.048106828	0.048106828	0.008133895	0.087703529	0.102955624	0.18763233
1613	1627	YER119C	chrV	-	TATA-less	TAF1-enriched	339	400830	400868	-38	YER119C	151.7	NULL	0.007690497	0.65792405	1	0.220861262	1	0.083811901	0.090598775	0.893187858
1614	1628	YER120W	chrV	+	TATA-less	TAF1-enriched	22907	401139	401109	-30	YER120W	1872.9	NULL	0.006537796	0.006537796	0.203693596	0.688030163	0.583501956	0.228361945	0.101109741	0.077974734
1615	1629	YER122C	chrV	-	TATA-containing	TAF1-enriched	538	404363	404433	-70	YER122C	1178.4	NULL	0.008740976	0.006240605	0.042651237	0.125525756	0.007049543	0.041979528	0.11956436	0.042651237
1616	1630	YER123W	chrV	+	TATA-less	TAF1-enriched	197	404674	404625	-49	YER123W	371.9	NULL	0.173058229	0.068723327	0.237503882	0.576150122	0.083148037	0.872382973	0.761209673	0.303193256
1617	1631	YER124C	chrV	-	TATA-containing	TAF1-depleted	691	408946	409102	-156	YER124C	1883.7	NULL	0.007800146	0.173058229	0.344156576	0.344156576	0.045989475	0.344156576	0.427199637	0.113846298
1618	1632	CUT564	chrV	-	TATA-less	TAF1-enriched	1	409323	409357	-34	CUT564	35.7	NULL	0.226187914	0.668938973	0.223883771	0.2811981	0.797164177	0.14472819	0.032514852	0.892500695
1619	1633	YER126C	chrV	-	TATA-less	TAF1-enriched	5675	414209	414208	1	YER126C	3936.8	NULL	0.007259955	1	0.044001861	0.044001861	0.007259955	0.044001861	0.195548026	0.077974734
1620	1634	YER127W	chrV	+	TATA-less	TAF1-enriched	305	414502	414464	-38	YER127W	327.6	NULL	0.2645353	0.007800146	0.690816272	1	1	1	0.668938973	0.14472819
1621	1635	CUT566	chrV	-	TATA-less	TAF1-enriched	33	416492	416551	-59	CUT566	21.1	NULL	0.443898466	0.008360374	0.595883091	0.694417686	0.074024444	0.088675943	0.394107149	0.049491231
1622	1636	CUT116	chrV	+	TATA-less	TAF1-enriched	6	421985	421929	-56	CUT116	0.1	NULL	1	0.46815991	NaN	NaN	1	NaN	NaN	NaN
1623	1637	YER130C	chrV	-	TATA-containing	TAF1-depleted	970	422354	422507	-153	YER130C	7028.1	NULL	0.006240605	0.006143194	0.03605437	0.035410671	0.015372288	0.035410671	0.00604661	0.03605437
1624	1638	YER131W	chrV	+	TATA-less	TAF1-enriched	902	423719	423536	-183	YER131W	5024.3	NULL	0.217300922	0.004055953	0.419740503	0.092176992	0.26397069	0.657788651	0.146100466	0.026183688
1625	1639	ANT145	chrV	-	TATA-less	TAF1-depleted	14	424790	424843	-53	ANT145	58.3	NULL	0.040828988	0.049185351	0.088888889	0.711111111	0.367676768	0.088888889	1	0.4
1626	1640	YER132C	chrV	-	TATA-less	TAF1-enriched	1399	430842	430891	-49	YER132C	102.2	NULL	1	0.171207268	0.690816272	0.1484791	0.731370313	0.353367292	1	0.084784996
1627	1642	CUT567	chrV	-	TATA-containing	TAF1-enriched	20041	431379	431377	2	CUT567	1339	NULL	0.087589736	0.004614763	0.576150122	0.576150122	0.91124672	0.746885633	0.360765351	0.576150122
1628	1643	YER133W	chrV	+	TATA-less	TAF1-enriched	6817	432497	432433	-64	YER133W	2159.1	NULL	0.200353348	0.070479927	0.694417686	0.145981945	0.125042727	0.145981945	0.931847255	0.188991722
1629	1644	CUT568	chrV	-	TATA-less	TAF1-enriched	255	432798	432830	-32	CUT568	194.6	NULL	0.007800146	0.472713923	0.046044853	1	0.007800146	0.594729336	0.339899051	0.110492024
1630	1645	tH(GUG)E2	chrV	-	TATA-less	-	100	434590	434623	-33	tH(GUG)E2	42.1	NULL	0.542899463	0.340778614	1	0.688030163	0.339899051	0.507386527	0.790104282	0.594729336
1631	1646	orphan	chrV	+	TATA-less	TAF1-enriched	3	435634	435544	-90	orphan	0.2	NULL	NaN	1	NA	NA	NaN	NA	NaN	NA
1632	1647	YER134C	chrV	-	TATA-less	TAF1-enriched	1362	437765	437849	-84	YER134C	587.9	NULL	0.932087071	0.345126713	0.048106828	0.894523556	0.099877403	0.237122014	0.549408625	0.348808623
1633	1648	orphan	chrV	+	TATA-less	TAF1-enriched	166	439197	439181	-16	orphan	3.4	NULL	0.63030303	0.933333333	0.222222222	NA	0.63030303	0.711111111	1	0.177777778
1634	1649	YER136W	chrV	+	TATA-less	TAF1-enriched	1964	439688	439521	-167	YER136W	1527.1	NULL	0.729976105	0.007800146	0.145981945	0.145981945	0.196353718	0.177967426	0.197157484	0.047417494
1635	1650	YER137C	chrV	-	TATA-less	TAF1-depleted	38	442012	442086	-74	YER137C	1.5	NULL	0.637351888	0.349574806	1	0.349574806	0.349574806	0.662520584	0.181358276	1
1636	1651	orphan	chrV	+	TATA-containing	TAF1-depleted	3786	442625	442457	-168	orphan	11943.4	NULL	0.367676768	0.307332348	0.711111111	0.888888889	0.864900617	0.533333333	0.609758799	0.793389781
1637	1652	orphan	chrV	-	TATA-less	TAF1-enriched	81	452976	453121	-145	orphan	13.2	NULL	0.268767553	0.60913007	0.357835467	0.895810367	0.443097314	0.894849724	0.551517708	0.508708087
1638	1653	YER141W	chrV	+	TATA-less	TAF1-enriched	2533	453430	453427	-3	YER141W	2234.2	NULL	0.001643552	0.001643552	0.004915802	NaN	0.009454169	NaN	NaN	0.004915802
1639	1654	YER142C	chrV	-	TATA-less	TAF1-enriched	147	456071	456103	-32	YER142C	185	NULL	0.864428679	0.791268113	0.18763233	0.893526535	0.008133895	0.893526535	0.930608862	0.048106828
1640	1655	orphan	chrV	-	TATA-less	TAF1-enriched	1937	460181	460232	-51	orphan	568.1	NULL	0.007259955	0.297569609	0.058495155	0.303193256	0.019373319	0.892845929	0.377660987	0.685167447
1641	1656	YER144C	chrV	-	TATA-less	TAF1-depleted	156	460553	460614	-61	YER144C	52.2	NULL	0.232842047	0.008246738	0.512610438	0.894849724	0.148125677	0.694417686	0.733196121	0.359305232
1642	1657	orphan	chrV	+	TATA-less	TAF1-enriched	171	461221	461130	-91	orphan	99.1	NULL	0.302187416	0.036700635	0.792147392	0.894849724	0.122378978	1	0.657313488	0.083811901
1643	1658	ANT136	chrV	+	TATA-less	TAF1-enriched	139	461221	461180	-41	ANT136	99.9	NULL	0.606584521	0.077659882	1	1	0.267082584	1	0.796096689	0.293325574
1644	1659	orphan	chrV	-	TATA-less	TAF1-enriched	659	461374	461407	-33	orphan	455.8	NULL	0.443898466	0.60913007	0.049491231	0.049491231	0.349393711	0.049491231	0.443898466	0.088675943
1645	1660	YER145C	chrV	-	TATA-containing	TAF1-depleted	1096	461751	461766	-15	YER145C	619.3	NULL	1	0.260236203	1	0.686130413	0.173916672	0.22538387	0.785246408	0.345717816
1646	1661	YER146W	chrV	+	TATA-less	TAF1-enriched	2009	462625	462541	-84	YER146W	1116.8	NULL	0.146700539	0.797516299	0.048106828	0.064258531	0.345126713	0.506054349	0.789711992	0.506054349
1647	1662	YER148W	chrV	+	TATA-less	TAF1-enriched	711	465154	465110	-44	YER148W	3067.9	NULL	0.007154342	0.007154342	0.044001861	0.081865671	0.006537796	0.044001861	0.521551992	0.503357576
1648	1663	YER149C	chrV	-	TATA-less	TAF1-enriched	758	467481	467521	-40	YER149C	341.7	NULL	0.024602777	0.007800146	0.226876582	0.786943898	0.146148201	0.046730149	0.382993842	0.507386527
1649	1664	YER150W	chrV	+	TATA-containing	TAF1-depleted	1885	468422	468335	-87	YER150W	3839	NULL	0.001733589	0.001688186	0.005188608	0.005188608	0.001556573	0.004915802	0.001733589	NaN
1650	1665	YER151C	chrV	-	TATA-less	TAF1-enriched	6683	472418	472498	-80	YER151C	1072.6	NULL	0.730907977	0.006842389	0.690816272	0.339408154	0.796454389	0.892152103	0.486833797	0.507386527
1651	1666	YER153C	chrV	-	TATA-less	TAF1-enriched	106	474684	474808	-124	YER153C	91.3	NULL	0.229533472	0.08830911	0.049491231	0.512610438	0.145270893	0.359305232	0.172722365	0.895172885
1652	1667	YER154W	chrV	+	TATA-less	TAF1-enriched	2285	475056	475010	-46	YER154W	365.7	NULL	0.08830911	0.021396137	0.507386527	0.356355957	0.386476231	0.895810367	0.607225552	0.507386527
1653	1668	YER155C	chrV	-	TATA-less	TAF1-enriched	3519	482962	483086	-124	YER155C	341.8	NULL	0.073010712	0.008133895	0.511319908	0.083811901	0.547986032	0.087703529	0.171965576	0.692632784
1654	1669	orphan	chrV	-	TATA-less	TAF1-enriched	2598	482962	483098	-136	orphan	320.6	NULL	0.007910597	0.007800146	0.046730149	0.080892654	0.024343384	1	0.930861941	0.143471009
1655	1670	CUT118	chrV	+	TATA-less	TAF1-enriched	82	483364	483319	-45	CUT118	48.7	NULL	0.808080808	0.394938074	0.1484791	0.711111111	0.017221251	0.266666667	0.609758799	1
1656	1671	YER156C	chrV	-	TATA-less	TAF1-enriched	3366	484313	484357	-44	YER156C	2907.5	NULL	0.015128341	0.007800146	0.232774339	0.684195574	0.007800146	0.104870291	0.035253888	0.046730149
1657	1672	YER157W	chrV	+	TATA-less	TAF1-enriched	199	484808	484772	-36	YER157W	646.3	NULL	0.797866593	0.049587742	0.690816272	0.237122014	0.49463363	0.693529129	0.265387054	0.690816272
1658	1673	YER158W-A	chrV	+	TATA-containing	TAF1-enriched	1003	491536	491518	-18	YER158W-A	15.7	NULL	0.028282828	0.008360374	0.044444444	0.888888889	0.214141414	0.533333333	0.282828283	0.044444444
1659	1674	YER159C	chrV	-	TATA-less	TAF1-depleted	160	NA	492121	NA	YER159C	1182.2	NULL	0.548699	1	0.046730149	1	0.007800146	0.353367292	0.548699	0.046730149
1660	1675	tR(ACG)E	chrV	-	TATA-less	-	14	492407	492440	-33	tR(ACG)E	21.7	NULL	0.543329872	1	0.419740503	0.322843128	0.543329872	0.554772097	0.218758005	0.419740503
1661	1676	YER161C	chrV	-	TATA-less	TAF1-enriched	265	500353	500378	-25	YER161C	140.4	NULL	0.001733589	0.433848066	1	0.080118314	0.215924939	0.005188608	0.049238968	NaN
1662	1677	CUT119	chrV	+	TATA-less	TAF1-enriched	617	500654	500635	-19	CUT119	25.2	NULL	0.863951761	0.2645353	0.426325543	0.694417686	0.347696494	0.430614455	0.60913007	1
1663	1678	YER162C	chrV	-	TATA-less	TAF1-depleted	227	502882	502929	-47	YER162C	189.5	NULL	0.104798141	0.015313822	0.14972246	0.895810367	0.797866593	0.359305232	0.551517708	1
1664	1679	ST0954	chrV	+	TATA-less	TAF1-enriched	19899	504074	504068	-6	ST0954	1272.5	NULL	0.254772333	0.479364203	0.659023837	0.659023837	0.120315543	0.659023837	0.479364203	0.588809187
1665	1680	YER164W	chrV	+	TATA-less	TAF1-enriched	166	505258	505177	-81	YER164W	125.9	NULL	0.732743159	0.049185351	0.894849724	0.694417686	0.306482234	0.293325574	0.931726391	0.691728538
1666	1681	YER166W	chrV	+	TATA-less	TAF1-enriched	433	512511	512444	-67	YER166W	964.3	NULL	0.003061939	0.183966819	0.015494295	0.023868442	0.002685983	0.023868442	0.214542019	0.015494295
1667	1682	YER167W	chrV	+	TATA-less	TAF1-enriched	24	518031	517918	-113	YER167W	28.9	NULL	0.016161616	0.682828283	0.266666667	0.888888889	0.214141414	0.711111111	0.268767553	0.888888889
1668	1683	YER168C	chrV	-	TATA-less	TAF1-enriched	1387	522658	522662	-4	YER168C	787.9	NULL	0.007259955	1	0.04332537	0.303193256	0.012178835	0.303193256	0.414594196	0.04332537
1669	1684	YER169W	chrV	+	TATA-less	TAF1-enriched	175	523158	523122	-36	YER169W	287.8	NULL	0.194740405	0.06745128	0.278075687	0.226876582	0.067955329	0.046044853	0.789711992	0.483171819
1670	1685	YER170W	chrV	+	TATA-less	TAF1-enriched	339	525963	525951	-12	YER170W	145.1	NULL	0.797516299	0.796810213	0.234230702	0.894849724	0.39159429	0.2811981	0.931726391	0.085758003
1671	1686	YER171W	chrV	+	TATA-containing	TAF1-enriched	210	527028	526993	-35	YER171W	472.4	NULL	0.008133895	0.008360374	0.430614455	0.354866599	0.733196121	0.049491231	0.931726391	0.693529129
1672	1687	YER172C	chrV	-	TATA-less	TAF1-enriched	27	536074	536062	12	YER172C	455.1	NULL	0.011560425	0.045989475	0.279641534	0.676082741	0.542158797	1	0.165086234	0.279641534
1673	1688	YER174C	chrV	-	TATA-less	TAF1-enriched	491	539256	539282	-26	YER174C	655.4	NULL	0.549408625	0.606584521	0.792147392	0.048798093	0.070985635	0.084784996	0.864428679	1
1674	1689	ST4659	chrV	-	TATA-containing	TAF1-enriched	203	541398	541456	-58	ST4659	98.4	NULL	0.125706788	0.197959327	0.044444444	0.600401848	0.013624302	0.088888889	0.56969697	0.049491231
1675	1690	YER176W	chrV	+	TATA-less	TAF1-enriched	22	541702	541648	-54	YER176W	112.7	NULL	0.004532406	0.01249777	0.026183688	0.623433341	0.004532406	0.052107267	0.018163018	0.02677094
1676	1691	orphan	chrV	-	TATA-less	TAF1-enriched	140	544465	544543	-78	orphan	37.5	NULL	0.460606061	0.088869286	0.190345809	0.044444444	0.172722365	0.533333333	0.233663465	0.432023291
1677	1692	orphan	chrV	+	TATA-less	TAF1-enriched	57	545038	544908	-130	orphan	90.2	NULL	0.460606061	0.282828283	0.711111111	0.177777778	0.072727273	0.600401848	0.670582894	0.14972246
1678	1693	CUT571	chrV	-	TATA-less	TAF1-enriched	2489	544859	545034	-175	CUT571	478	NULL	0.265387054	0.345986525	0.692632784	0.048106828	0.864190848	0.18763233	0.491556101	0.894523556
1679	1694	YER177W	chrV	+	TATA-less	TAF1-enriched	1496	545679	545562	-117	YER177W	12056.9	NULL	0.798561763	0.551517708	0.895810367	1	0.394107149	1	0.864665265	1
1680	1695	orphan	chrV	-	TATA-less	TAF1-enriched	8	545898	545910	-12	orphan	1.5	NULL	0.170608745	0.105364053	0.72903449	0.840730447	1	0.840730447	0.468716582	0.213373707
1681	1696	YER178W	chrV	+	TATA-less	TAF1-enriched	10254	546836	546789	-47	YER178W	3466.2	NULL	0.007581651	0.006945558	0.111611768	0.047417494	0.031901272	0.046730149	0.023571084	0.590013887
1682	1697	ST4661	chrV	-	TATA-less	TAF1-enriched	305	549159	549194	-35	ST4661	192.4	NULL	0.007690497	0.007690497	0.143471009	0.415937626	0.16585666	0.587593848	0.132941731	0.139679141
1683	1698	YER180C-A	chrV	-	TATA-less	TAF1-enriched	207	551267	551368	-101	YER180C-A	44.7	NULL	0.930987447	0.173058229	0.590013887	0.499229169	0.173058229	0.210044337	0.07198232	0.499229169
1684	1700	YER183C	chrV	-	TATA-containing	TAF1-enriched	98	553906	553970	-64	YER183C	286	NULL	0.197157484	1	0.68989587	0.046044853	0.485230567	0.046044853	0.336347008	0.68989587
1685	1701	YER184C	chrV	-	TATA-less	TAF1-enriched	46	NA	559012	NA	YER184C	251.5	NULL	0.551517708	0.008360374	1	0.694417686	0.493101793	0.065915952	0.493101793	0.508708087
1686	1702	orphan	chrV	+	TATA-less	TAF1-enriched	13	560864	560810	-54	orphan	32.6	NULL	0.367676768	0.061271395	0.432023291	0.888888889	0.088869286	0.888888889	0.932206034	0.432023291
1687	1703	ST0970	chrV	+	TATA-less	TAF1-enriched	30	563016	562915	-101	ST0970	39.3	NULL	0.124377909	0.200353348	0.357835467	0.895493084	0.171965576	0.357835467	0.550817954	0.083811901
1688	1704	CUT572	chrV	-	TATA-less	TAF1-enriched	73	NA	567592	NA	CUT572	106.1	NULL	0.106024499	0.008246738	0.188991722	0.512610438	0.008360374	0.293325574	0.050394337	1
1689	1705	orphan	chrVI	-	TATA-less	TAF1-enriched	262	16432	16492	-60	orphan	145.9	NULL	0.348546687	0.061271395	1	0.4	0.460606061	0.177777778	0.933333333	0.4
1690	1706	orphan	chrVI	+	TATA-less	TAF1-depleted	24	16723	16673	-50	orphan	54.1	NULL	0.012178835	0.480330338	0.892845929	0.058495155	0.119032898	0.345717816	0.217659321	0.659023837
1691	1707	orphan	chrVI	-	TATA-less	TAF1-enriched	5	30876	31034	-158	orphan	22.2	NULL	0.233663465	0.550817954	0.4	0.888888889	0.932206034	0.888888889	0.282828283	0.888888889
1692	1708	YFL049W	chrVI	+	TATA-containing	TAF1-enriched	136	36821	36781	-40	YFL049W	122.8	NULL	0.549408625	0.173477636	0.694417686	0.359305232	0.932206034	0.1484791	0.797516299	1
1693	1709	YFL048C	chrVI	-	TATA-less	TAF1-enriched	73	40155	40202	-47	YFL048C	2004.7	NULL	0.010733416	0.07198232	0.02677094	0.02677094	0.004133256	0.02677094	0.004133256	0.052107267
1694	1710	YFL047W	chrVI	+	TATA-less	TAF1-enriched	129	40448	40413	-35	YFL047W	1604.3	NULL	0.017417759	0.004866885	0.419740503	0.623433341	0.012315703	0.623433341	0.137134544	0.573775404
1695	1711	YFL045C	chrVI	-	TATA-less	TAF1-enriched	12903	44426	44467	-41	YFL045C	9737.8	NULL	0.020487551	0.006842389	0.046044853	0.046044853	0.016065427	0.046044853	0.486034034	0.046044853
1696	1712	CUT121	chrVI	+	TATA-less	TAF1-enriched	36	44724	44679	-45	CUT121	29.5	NULL	0.394938074	0.387337939	0.694417686	0.4	0.933333333	0.600401848	0.682828283	0.4
1697	1713	YFL044C	chrVI	-	TATA-less	TAF1-enriched	90	45534	45579	-45	YFL044C	873.7	NULL	0.170471105	0.122563702	0.148263844	0.576150122	0.524902502	0.576150122	0.360765351	0.301326595
1698	1714	YFL042C	chrVI	-	TATA-less	TAF1-enriched	230	47731	47751	-20	YFL042C	993.2	NULL	0.01012654	0.001556573	0.004915802	0.004915802	0.001643552	0.005188608	0.001313653	0.004915802
1699	1715	YFL041W	chrVI	+	TATA-containing	TAF1-enriched	209	49160	49121	-39	YFL041W	527.4	NULL	0.054272723	0.595883091	0.015494295	0.802587349	0.263552477	0.802587349	0.595883091	0.07587851
1700	1716	ST0982	chrVI	+	TATA-less	TAF1-enriched	0	54632	54575	-57	ST0982	10.9	NULL	0.282828283	0.682828283	0.088888889	0.266666667	0.013134295	0.044444444	0.864900617	0.711111111
1701	1717	YFL039C	chrVI	-	TATA-containing	TAF1-depleted	38030	NA	54892	NA	YFL039C	107338	NULL	0.003061939	0.003329187	0.348501424	0.015975041	0.002685983	0.015975041	0.595883091	0.802587349
1702	1718	ANT156	chrVI	+	TATA-less	TAF1-enriched	12	55075	55063	-12	ANT156	314.3	NULL	0.125042727	0.013460069	0.14972246	0.430614455	0.201939802	0.293325574	0.232842047	0.14972246
1703	1719	YFL038C	chrVI	-	TATA-less	TAF1-enriched	1843	55977	56066	-89	YFL038C	6418.7	NULL	0.007910597	0.014577797	0.046730149	0.888854163	0.007473611	0.417455426	0.775867448	0.046044853
1704	1720	YFL037W	chrVI	+	TATA-less	TAF1-enriched	921	56340	56271	-69	YFL037W	6868.7	NULL	0.186557552	0.005950856	0.112351198	0.283876475	0.005393812	0.036701192	0.168736535	0.283876475
1705	1721	YFL036W	chrVI	+	TATA-less	TAF1-enriched	1399	58618	58581	-37	YFL036W	1174.3	NULL	0.015051346	0.002685983	0.802587349	0.802587349	0.191694602	0.015975041	0.694095468	0.802587349
1706	1722	YFL034C-B	chrVI	-	TATA-less	TAF1-enriched	3617	63994	64034	-40	YFL034C-B	477.5	NULL	0.057197149	0.007800146	0.222376248	0.591208103	0.101725395	0.046730149	0.329997707	0.046730149
1707	1723	YFL034C-A	chrVI	-	TATA-less	TAF1-enriched	9270	64954	64977	-23	YFL034C-A	1495.9	NULL	0.007259955	0.118361567	0.042651237	0.219338776	0.100493741	1	0.479500122	0.042651237
1708	1724	YFL034W	chrVI	+	TATA-less	TAF1-enriched	139	65315	65288	-27	YFL034W	329.9	NULL	0.025844118	0.79400268	0.015494295	0.802587349	0.418876446	0.45605654	0.595883091	0.015494295
1709	1725	YFL033C	chrVI	-	TATA-less	TAF1-enriched	4119	74616	74665	-49	YFL033C	336.9	NULL	0.008360374	0.201939802	0.049491231	0.049491231	0.147413673	1	0.232018345	0.049491231
1710	1726	YFL031W	chrVI	+	TATA-less	TAF1-enriched	103262	NA	75113	NA	YFL031W	18224.9	NULL	0.010355673	0.050186187	NaN	NaN	NaN	NaN	0.050186187	NaN
1711	1727	YFL029C	chrVI	-	TATA-less	TAF1-enriched	677	79158	79183	-25	YFL029C	358	NULL	0.667829275	0.008246738	0.512610438	0.430614455	0.731830274	0.693529129	0.668385514	0.235679913
1712	1728	YFL028C	chrVI	-	TATA-less	TAF1-enriched	314	80184	80235	-51	YFL028C	451.8	NULL	0.138782557	0.007800146	0.339408154	0.893526535	0.657313488	0.893526535	0.727603425	0.893526535
1713	1729	YFL027C	chrVI	-	TATA-less	TAF1-enriched	242	81860	81923	-63	YFL027C	723.6	NULL	1	0.808080808	0.06674615	0.06674615	0.443097314	0.793389781	0.306482234	0.357835467
1714	1730	YFL026W	chrVI	+	TATA-less	TAF1-depleted	1492	82652	82550	-102	YFL026W	3696.3	NULL	0.006945558	1	1	0.89108562	0.542899463	1	0.516391788	1
1715	1731	YFL025C	chrVI	-	TATA-less	TAF1-enriched	1194	87290	87313	-23	YFL025C	151.8	NULL	0.004614763	0.479364203	1	0.421881247	0.004866885	0.576150122	0.776342228	0.03871668
1716	1732	ST0990	chrVI	+	TATA-less	TAF1-enriched	63	89777	89656	-121	ST0990	312.8	NULL	0.007800146	0.250535974	0.046044853	0.046044853	0.006740038	0.142210424	0.046784411	0.046044853
1717	1733	YFL024C	chrVI	-	TATA-less	TAF1-enriched	1512	90611	90624	-13	YFL024C	410	NULL	0.017219911	0.008360374	0.114961001	0.430614455	0.931726391	0.894849724	1	0.065915952
1718	1734	YFL023W	chrVI	+	TATA-less	TAF1-enriched	156	91011	90972	-39	YFL023W	238	NULL	0.145340804	0.004866885	0.027362545	1	0.022342981	1	1	0.421881247
1719	1735	YFL022C	chrVI	-	TATA-less	TAF1-enriched	7907	94990	95071	-81	YFL022C	571	NULL	0.169686101	0.008360374	1	1	0.007910597	0.595883091	0.012972764	0.048798093
1720	1736	YFL021W	chrVI	+	TATA-containing	TAF1-depleted	409	96128	96085	-43	YFL021W	670.8	NULL	1	0.007154342	0.041979528	0.042651237	0.046386593	0.67502412	0.128645924	0.076031041
1721	1737	tP(UGG)F	chrVI	-	TATA-containing	-	6	101057	101194	-137	tP(UGG)F	4	NULL	0.440673311	0.666708361	0.690816272	0.690816272	1	1	0.72903449	0.507386527
1722	1738	YFL018C	chrVI	-	TATA-containing	TAF1-depleted	1406	103140	103210	-70	YFL018C	6705.5	NULL	0.006740038	0.005950856	0.470486422	0.040643643	0.286844064	0.039979603	0.125786425	0.039979603
1723	1739	YFL017W-A	chrVI	+	TATA-less	TAF1-enriched	1816	103724	103645	-79	YFL017W-A	1398.1	NULL	0.928755908	0.328151669	0.670683572	0.386476231	0.526551787	0.386476231	0.365633042	1
1724	1740	YFL017C	chrVI	-	TATA-containing	TAF1-depleted	274	104429	104484	-55	YFL017C	1742.2	NULL	0.049990741	0.19875925	0.114961001	0.14972246	0.232018345	0.114961001	0.796810213	0.048798093
1725	1741	YFL016C	chrVI	-	TATA-less	TAF1-enriched	782	106071	106242	-171	YFL016C	508.3	NULL	0.798215076	1	0.693529129	0.048798093	1	1	0.201147528	0.357835467
1726	1742	YFL013C	chrVI	-	TATA-less	TAF1-enriched	45	109929	109952	-23	YFL013C	359.4	NULL	0.006945558	0.790104282	0.040643643	0.887685742	0.006842389	0.040643643	0.01849969	0.470486422
1727	1743	ST0998	chrVI	+	TATA-less	TAF1-enriched	154	110240	110230	-10	ST0998	58.4	NULL	0.021396137	0.008360374	0.512610438	0.088675943	1	0.048798093	0.667829275	1
1728	1744	YFL010C	chrVI	-	TATA-less	TAF1-enriched	438	115738	115772	-34	YFL010C	754.5	NULL	0.191490579	0.006143194	1	0.299445905	0.25586886	0.299445905	0.632142422	0.673955067
1729	1745	YFL009W	chrVI	+	TATA-less	TAF1-enriched	214	115988	115953	-35	YFL009W	64.5	NULL	0.438217981	0.293333361	0.688030163	0.228361945	0.545100219	0.044680647	1	1
1730	1746	orphan	chrVI	+	TATA-containing	TAF1-enriched	1	NA	118796	NA	orphan	4.2	NULL	1	0.921212121	0.895493084	0.666666667	0.125706788	1	0.016161616	0.793389781
1731	1747	CUT575	chrVI	-	TATA-less	TAF1-enriched	95	NA	119127	NA	CUT575	6.4	NULL	0.496151813	0.016161616	0.533333333	0.14972246	0.808080808	0.088888889	0.348546687	0.432023291
1732	1748	YFL008W	chrVI	+	TATA-less	TAF1-depleted	240	119428	119369	-59	YFL008W	162.1	NULL	0.086067568	0.049990741	0.508708087	0.595883091	0.797866593	0.59928633	0.796810213	0.894849724
1733	1749	YFL007W	chrVI	+	TATA-less	TAF1-enriched	1815	123391	123356	-35	YFL007W	580.8	NULL	0.002685983	0.003261123	0.015975041	0.015975041	0.151869315	0.015494295	0.191694602	0.023868442
1734	1750	YFL005W	chrVI	+	TATA-less	TAF1-enriched	1181	130362	130189	-173	YFL005W	8486.9	NULL	0.196353718	0.007581651	1	0.788281321	0.296048012	1	1	0.044680647
1735	1751	orphan	chrVI	-	TATA-less	TAF1-depleted	33	NA	131383	NA	orphan	284.4	NULL	0.005855932	0.281433138	0.034132951	0.034132951	0.005855932	0.772829993	0.423679582	0.034132951
1736	1752	YFL004W	chrVI	+	TATA-less	TAF1-depleted	546	131799	131659	-140	YFL004W	4011.7	NULL	0.548699	0.007473611	0.222376248	0.046730149	0.030684702	1	0.292471614	0.06260547
1737	1753	orphan	chrVI	+	TATA-less	TAF1-enriched	683	131799	131667	-132	orphan	4020.7	NULL	0.548699	0.007473611	0.176565351	0.046730149	0.012178835	0.786943898	0.297817462	0.046730149
1738	1754	YFR001W	chrVI	+	TATA-less	TAF1-enriched	236	149129	149086	-43	YFR001W	353	NULL	0.153535354	1	0.14972246	0.294801992	0.214141414	0.044444444	0.123046028	0.190345809
1739	1755	CUT576	chrVI	-	TATA-less	TAF1-enriched	16	149436	149746	-310	CUT576	7.3	NULL	1	1	0.238557044	0.512610438	0.798561763	1	0.932206034	0.238557044
1740	1756	YFR002W	chrVI	+	TATA-less	TAF1-enriched	179	150055	150007	-48	YFR002W	930.5	NULL	0.043622116	1	0.480085003	0.503357576	0.045989475	1	1	0.480085003
1741	1757	YFR004W	chrVI	+	TATA-less	TAF1-enriched	1002	153402	153351	-51	YFR004W	2127.2	NULL	0.329076491	0.128645924	0.301326595	0.301326595	0.015172523	0.301326595	0.128645924	0.301326595
1742	1758	YFR005C	chrVI	-	TATA-less	TAF1-enriched	483	155850	155896	-46	YFR005C	369.7	NULL	0.521551992	0.131471079	0.484695003	0.403363637	0.024834346	0.295641821	0.7860795	0.193930852
1743	1759	YFR007W	chrVI	+	TATA-less	TAF1-enriched	216	159316	159224	-92	YFR007W	133.9	NULL	0.048484848	0.060816949	0.533333333	0.294801992	0.173477636	0.4	1	0.234230702
1744	1760	YFR008W	chrVI	+	TATA-less	TAF1-enriched	503	160540	160519	-21	YFR008W	237.5	NULL	0.106024499	0.797164177	0.1484791	0.686130413	0.148125677	0.686130413	0.428069831	0.14972246
1745	1761	tG(GCC)F1	chrVI	+	TATA-less	-	780	162242	162216	-26	tG(GCC)F1	3.2	NULL	0.561275836	0.561275836	0.87832485	0.87832485	0.177015983	0.177015983	0.282425348	0.87832485
1746	1762	YFR009W	chrVI	+	TATA-less	TAF1-enriched	1678	162480	162431	-49	YFR009W	5933.1	NULL	0.001313653	0.001556573	NaN	0.004915802	NaN	0.005188608	0.049238968	NaN
1747	1763	YFR010W	chrVI	+	TATA-less	TAF1-enriched	1481	165015	164999	-16	YFR010W	942.3	NULL	0.033359567	0.004614763	0.055859225	0.576150122	0.014384847	0.659023837	0.360765351	0.02677094
1748	1764	YFR011C	chrVI	-	TATA-less	TAF1-enriched	3074	167245	167282	-37	YFR011C	234.8	NULL	0.158084651	0.044802434	0.17090352	0.657788651	0.647744929	0.657788651	0.253733094	0.657788651
1749	1765	YFR013W	chrVI	+	TATA-less	TAF1-enriched	1471	169906	169862	-44	YFR013W	89.1	NULL	0.547269697	0.797516299	0.894523556	0.232774339	0.193119366	0.357835467	0.492330692	0.507386527
1750	1766	orphan	chrVI	-	TATA-less	TAF1-enriched	185	173299	173358	-59	orphan	308.9	NULL	1	0.306482234	0.693529129	0.792771379	0.306482234	0.792771379	0.495394415	0.293325574
1751	1767	orphan	chrVI	-	TATA-less	TAF1-enriched	46	173610	173716	-106	orphan	624.7	NULL	0.306482234	0.733196121	0.088675943	0.512610438	0.074024444	0.049491231	0.267082584	0.048798093
1752	1768	YFR015C	chrVI	-	TATA-containing	TAF1-depleted	6120	176395	176467	-72	YFR015C	1847.2	NULL	0.01625572	0.020262769	0.690816272	0.786943898	0.931726391	0.046044853	0.434894327	0.06260547
1753	1769	orphan	chrVI	+	TATA-less	TAF1-enriched	117	177201	177060	-141	orphan	12.9	NULL	0.349393711	0.733196121	0.512610438	0.14972246	0.172722365	0.293325574	1	0.065915952
1754	1770	YFR016C	chrVI	-	TATA-less	TAF1-depleted	442	180657	180780	-123	YFR016C	451.8	NULL	0.007800146	0.048783581	0.046044853	0.14094646	0.007910597	0.688030163	0.666143638	0.046730149
1755	1771	YFR017C	chrVI	-	TATA-containing	TAF1-enriched	20517	182926	182927	-1	YFR017C	1052.3	NULL	0.073517488	0.105411524	0.357835467	0.424874689	0.607863471	0.895493084	0.602671521	0.113846298
1756	1772	YFR018C	chrVI	-	TATA-less	TAF1-enriched	31	184244	184275	-31	YFR018C	632.8	NULL	0.007154342	0.643687126	0.044680647	0.480085003	0.007473611	0.480085003	0.296048012	0.044001861
1757	1773	tS(GCU)F	chrVI	-	TATA-less	-	2799	191628	191623	5	tS(GCU)F	184.9	NULL	0.595883091	0.595883091	0.802587349	0.802587349	0.595883091	0.802587349	0.595883091	0.802587349
1758	1774	orphan	chrVI	-	TATA-less	TAF1-enriched	21	192017	192097	-80	orphan	18.5	NULL	0.460606061	0.214141414	1	0.533333333	0.496151813	0.888888889	0.153535354	0.533333333
1759	1775	orphan	chrVI	+	TATA-less	TAF1-enriched	48	192291	192285	-6	orphan	107.7	NULL	0.931847255	0.099877403	0.894849724	0.418961725	0.266236144	0.418961725	0.544370146	0.894849724
1760	1776	CUT577	chrVI	-	TATA-less	TAF1-enriched	58	194492	194539	-47	CUT577	42.4	NULL	0.158868602	0.857531313	0.219338776	0.040643643	0.024834346	0.891444622	0.281433138	0.055234254
1761	1777	YFR021W	chrVI	+	TATA-less	TAF1-enriched	2447	194760	194718	-42	YFR021W	605.1	NULL	0.193930852	0.006945558	0.042651237	0.04332537	0.006338844	0.138408493	0.024343384	0.176565351
1762	1778	YFR022W	chrVI	+	TATA-containing	TAF1-enriched	35	196593	196560	-33	YFR022W	226.5	NULL	0.013134295	0.013624302	0.177777778	0.044444444	0.028282828	0.600401848	0.797516299	0.049491231
1763	1779	YFR024C-A	chrVI	-	TATA-less	TAF1-enriched	468	203418	203457	-39	YFR024C-A	1039.1	NULL	0.004133256	0.004133256	0.03871668	1	0.004133256	0.260832152	0.008049086	1
1764	1780	YFR025C	chrVI	-	TATA-less	TAF1-enriched	786	204785	204774	11	YFR025C	701.9	NULL	0.070479927	0.248735631	0.788281321	0.274915837	0.342527737	0.887685742	1	0.06013513
1765	1781	YFR028C	chrVI	-	TATA-less	TAF1-enriched	160	210080	210145	-65	YFR028C	629.9	NULL	0.665005542	0.042448854	0.657788651	0.103741678	0.541414544	0.891444622	0.647744929	1
1766	1782	orphan	chrVI	+	TATA-less	TAF1-enriched	11	210352	210320	-32	orphan	1.6	NULL	0.683091398	0.37245587	NA	0.746885633	1	0.683091398	1	1
1767	1783	YFR029W	chrVI	+	TATA-less	TAF1-enriched	860	210919	210855	-64	YFR029W	148.6	NULL	0.19875925	0.021396137	0.238557044	0.508708087	0.60913007	0.508708087	0.493101793	0.895810367
1768	1784	orphan	chrVI	-	TATA-less	TAF1-enriched	0	212907	212939	-32	orphan	2.9	NULL	0.332316517	0.016867262	0.178366728	0.099997078	0.027919093	1	0.044722594	0.178366728
1769	1785	YFR030W	chrVI	+	TATA-containing	TAF1-enriched	687	213251	213203	-48	YFR030W	103.8	NULL	0.214141414	0.061271395	0.177777778	0.294801992	0.148125677	0.234230702	0.550817954	0.234230702
1770	1786	YFR031C	chrVI	-	TATA-less	TAF1-enriched	86	220125	220139	-14	YFR031C	97.3	NULL	0.864900617	0.933333333	0.533333333	0.177777778	0.153535354	0.4	0.933333333	0.4
1771	1787	YFR031C-A	chrVI	-	TATA-less	TAF1-enriched	5356	221398	221458	-60	YFR031C-A	11545	NULL	0.006240605	1	0.299445905	0.237503882	0.013238249	0.03605437	0.737315677	0.065390823
1772	1788	orphan	chrVI	-	TATA-less	TAF1-enriched	1900	221398	221559	-161	orphan	11523.3	NULL	0.006945558	0.191490579	0.654001121	0.203693596	0.014580044	0.039979603	1	0.072149939
1773	1789	YFR032C-A	chrVI	-	TATA-less	TAF1-enriched	11514	223751	223845	-94	YFR032C-A	1708.7	NULL	0.155478268	0.006338844	0.03605437	0.036701192	0.006240605	0.036701192	0.586516917	0.03605437
1774	1790	YFR033C	chrVI	-	TATA-less	TAF1-depleted	3580	224813	224875	-62	YFR033C	4038.8	NULL	0.731370313	0.015500277	0.288844366	0.047417494	0.930861941	0.047417494	0.19875925	0.047417494
1775	1791	orphan	chrVI	+	TATA-less	TAF1-enriched	18	225782	225675	-107	orphan	77.3	NULL	0.148125677	0.394107149	0.14972246	0.359305232	0.60913007	0.512610438	0.495394415	1
1776	1792	YFR034C	chrVI	-	TATA-less	TAF1-enriched	325	225958	225980	-22	YFR034C	397.7	NULL	0.169686101	0.020713285	0.508708087	0.506054349	0.345126713	0.085758003	0.120373467	0.14472819
1777	1793	orphan	chrVI	-	TATA-less	TAF1-enriched	173	226464	226513	-49	orphan	7	NULL	0.798561763	0.148125677	0.359305232	0.14972246	0.758931305	0.14972246	0.306482234	0.895810367
1778	1794	YFR035C	chrVI	-	TATA-containing	TAF1-enriched	492	226464	226772	-308	YFR035C	71.6	NULL	0.537638448	0.387337939	0.210044337	0.210044337	0.07198232	0.210044337	0.659736375	0.418961725
1779	1795	YFR037C	chrVI	-	TATA-less	TAF1-enriched	3369	229159	229192	-33	YFR037C	1936.6	NULL	0.004133256	0.004133256	0.027362545	0.576150122	0.004133256	0.076415596	0.054872606	0.148263844
1780	1796	YFR038W	chrVI	+	TATA-less	TAF1-enriched	406	229427	229394	-33	YFR038W	712.2	NULL	0.2645353	1	0.048106828	1	0.031901272	0.18763233	1	0.083811901
1781	1797	YFR039C	chrVI	-	TATA-less	TAF1-enriched	216	233619	233673	-54	YFR039C	126.5	NULL	0.394107149	0.19875925	0.430614455	0.792771379	0.125042727	0.14972246	0.2645353	0.359305232
1782	1798	YFR040W	chrVI	+	TATA-less	TAF1-enriched	613	234188	234004	-184	YFR040W	329.5	NULL	0.104798141	0.346843113	0.048106828	0.893187858	0.2645353	0.506054349	0.484423365	0.083811901
1783	1799	YFR041C	chrVI	-	TATA-less	TAF1-enriched	151	238243	238277	-34	YFR041C	764.9	NULL	0.007366379	0.542899463	0.100348246	0.784191229	0.014577797	0.04332537	0.342527737	0.580069411
1784	1800	YFR042W	chrVI	+	TATA-less	TAF1-enriched	154	238465	238422	-43	YFR042W	385.7	NULL	0.663276399	0.007800146	0.28733307	0.046730149	0.102340692	0.046730149	0.486833797	0.424874689
1785	1801	YFR044C	chrVI	-	TATA-less	TAF1-enriched	64840	241419	241455	-36	YFR044C	2102.4	NULL	0.005855932	0.214542019	0.177015983	0.87832485	0.00576184	0.413176151	0.214542019	0.033499083
1786	1802	CUT579	chrVI	-	TATA-less	TAF1-enriched	143	245867	245900	-33	CUT579	32.8	NULL	1	0.282828283	0.294801992	0.711111111	0.214141414	0.177777778	0.173477636	0.600401848
1787	1803	YFR048W	chrVI	+	TATA-less	TAF1-enriched	144	246150	246094	-56	YFR048W	228.8	NULL	0.200353348	0.172722365	0.14972246	1	0.046784411	0.507386527	0.025649925	0.085758003
1788	1804	YFR049W	chrVI	+	TATA-less	TAF1-enriched	437	248404	248358	-46	YFR049W	277.8	NULL	0.343397338	0.048783581	0.046730149	0.14472819	0.015128341	0.14472819	1	0.68989587
1789	1805	YFR050C	chrVI	-	TATA-less	TAF1-enriched	21435	249877	249912	-35	YFR050C	1103.2	NULL	0.329076491	0.04128299	0.039979603	0.040643643	0.006945558	0.040643643	0.438578026	0.577468662
1790	1806	YFR051C	chrVI	-	TATA-less	TAF1-enriched	2284	251773	251828	-55	YFR051C	489	NULL	0.020939966	0.489996346	0.184897599	0.184897599	0.039767939	0.354866599	0.931847255	0.111611768
1791	1807	CUT580	chrVI	-	TATA-less	TAF1-enriched	18	252237	252246	-9	CUT580	55.4	NULL	0.196353718	0.603988754	0.787615767	0.047417494	0.191490579	0.234230702	0.731830274	0.14472819
1792	1808	YFR052W	chrVI	+	TATA-less	TAF1-enriched	16145	252524	252491	-33	YFR052W	2718.8	NULL	0.004532406	0.524902502	0.301326595	0.02677094	0.293333361	0.026183688	0.05367389	0.573775404
1793	1809	YFR053C	chrVI	-	TATA-containing	TAF1-depleted	2615	NA	255155	NA	YFR053C	3062.3	NULL	0.929300411	0.409891343	0.035410671	0.887685742	0.006143194	0.035410671	0.029758067	0.554772097
1794	1810	ST4738	chrVI	-	TATA-less	TAF1-enriched	209	263082	263200	-118	ST4738	111.4	NULL	0.682828283	0.028282828	0.888888889	0.266666667	1	0.894849724	0.282828283	0.888888889
1795	1811	CUT124	chrVI	+	TATA-less	TAF1-enriched	29	263567	263438	-129	CUT124	104.6	NULL	0.007910597	0.010298923	0.048106828	0.894194334	0.007049543	0.064258531	0.080461474	0.048106828
1796	1812	CUT581	chrVI	-	TATA-less	TAF1-enriched	20	263823	263855	-32	CUT581	14.1	NULL	0.233663465	0.016161616	0.044444444	0.4	0.864900617	0.711111111	0.367676768	0.600401848
1797	1813	YFR055W	chrVI	+	TATA-containing	TAF1-depleted	530	264262	264179	-83	YFR055W	1432.8	NULL	0.008021847	0.30562919	0.048106828	0.4291953	0.008133895	0.232774339	0.728559975	0.048106828
1798	1814	YGL263W	chrVII	+	TATA-less	TAF1-enriched	110	2799	2771	-28	YGL263W	74.9	NULL	0.026445101	0.439858381	0.356355957	0.345717816	0.733196121	0.345717816	0.230364065	0.145981945
1799	1815	YGL257C	chrVII	-	TATA-less	TAF1-enriched	739	14248	14266	-18	YGL257C	446.6	NULL	0.733646789	0.367676768	0.432023291	0.177777778	0.349393711	0.4	1	0.266666667
1800	1816	YGL256W	chrVII	+	TATA-less	TAF1-enriched	489	14703	14661	-42	YGL256W	480.2	NULL	0.029482772	0.534549972	0.041979528	0.042651237	0.006240605	0.137134544	0.173058229	0.076031041
1801	1817	YGL255W	chrVII	+	TATA-less	TAF1-enriched	236	21052	20933	-119	YGL255W	1051.8	NULL	0.032207629	0.007910597	0.133293185	0.684195574	0.729976105	0.892152103	0.775867448	0.133293185
1802	1818	YGL254W	chrVII	+	TATA-less	TAF1-enriched	116	22330	22295	-35	YGL254W	280.6	NULL	0.007910597	0.045197383	0.063431425	0.081865671	0.158084651	0.081865671	0.117016849	0.499229169
1803	1819	orphan	chrVII	-	TATA-containing	TAF1-enriched	85	23043	23134	-91	orphan	140.1	NULL	0.007910597	1	0.353367292	0.046730149	0.04838244	0.046730149	0.545826818	0.353367292
1804	1820	YGL253W	chrVII	+	TATA-containing	TAF1-depleted	10894	23920	23888	-32	YGL253W	4912.8	NULL	0.001688186	0.001556573	0.004915802	NaN	0.001313653	NaN	NaN	0.004915802
1805	1821	YGL252C	chrVII	-	TATA-less	TAF1-enriched	288	27487	27532	-45	YGL252C	713.6	NULL	0.011408183	0.011408183	0.078947122	0.125525756	0.014943839	0.125525756	0.11956436	0.484695003
1806	1822	ST1043	chrVII	+	TATA-less	TAF1-enriched	321	27808	27765	-43	ST1043	146	NULL	0.104798141	0.008021847	0.237122014	0.344156576	0.008246738	0.183522244	0.229533472	1
1807	1823	ST4747	chrVII	-	TATA-less	TAF1-enriched	123	NA	35275	NA	ST4747	411.6	NULL	0.230364065	0.059003394	0.047417494	0.354866599	0.012493644	0.894849724	0.438217981	0.081865671
1808	1824	YGL247W	chrVII	+	TATA-less	TAF1-enriched	862	36977	36931	-46	YGL247W	519.7	NULL	0.251431859	0.021167585	0.594729336	0.893526535	0.487629882	0.083811901	0.436563363	0.354866599
1809	1825	YGL246C	chrVII	-	TATA-less	TAF1-enriched	797	38773	38809	-36	YGL246C	1010.9	NULL	0.072504128	0.008021847	0.186267625	0.687084608	0.795737098	0.135857322	0.143836769	0.083811901
1810	1826	YGL245W	chrVII	+	TATA-less	TAF1-enriched	4124	39050	39008	-42	YGL245W	19198.8	NULL	0.006537796	0.007154342	0.044001861	0.228361945	0.006537796	0.203693596	0.380344058	0.044001861
1811	1827	YGL244W	chrVII	+	TATA-less	TAF1-enriched	133	41490	41451	-39	YGL244W	565.6	NULL	0.667829275	0.044802434	0.176565351	1	1	0.14472819	0.667829275	1
1812	1828	orphan	chrVII	+	TATA-containing	TAF1-enriched	206	48626	48612	-14	orphan	202.5	NULL	0.427199637	0.020487551	0.507386527	0.065086726	0.099877403	0.344156576	0.492330692	0.685167447
1813	1829	YGL238W	chrVII	+	TATA-less	TAF1-enriched	765	49586	49549	-37	YGL238W	2586.4	NULL	0.001313653	0.001556573	0.005188608	NaN	0.001313653	NaN	NaN	0.004915802
1814	1830	YGL237C	chrVII	-	TATA-less	TAF1-enriched	2318	53571	53612	-41	YGL237C	180.2	NULL	0.797164177	0.007690497	0.046730149	0.232774339	0.007800146	0.14094646	0.256747856	1
1815	1831	YGL236C	chrVII	-	TATA-less	TAF1-enriched	172	55762	55813	-51	YGL236C	49	NULL	0.193930852	0.014943839	0.137134544	0.057677444	0.653580299	0.078947122	0.536101864	0.223883771
1816	1832	CUT585	chrVII	-	TATA-less	TAF1-enriched	183	56087	56115	-28	CUT585	216.6	NULL	0.008360374	0.008360374	0.59928633	0.049491231	0.732743159	0.049491231	0.072504128	0.049491231
1817	1833	YGL234W	chrVII	+	TATA-less	TAF1-enriched	83928	56399	56380	-19	YGL234W	1410.2	NULL	0.006240605	0.389912585	0.03605437	0.419740503	0.006143194	0.139793337	0.307857814	0.03605437
1818	1834	YGL233W	chrVII	+	TATA-less	TAF1-enriched	154	59132	59076	-56	YGL233W	620.9	NULL	0.261101437	0.008133895	0.182141555	1	0.256747856	0.086730865	0.071491579	0.231310785
1819	1835	orphan	chrVII	+	TATA-less	TAF1-enriched	101	62110	62053	-57	orphan	1034.6	NULL	0.200353348	0.007800146	0.511319908	0.690816272	0.797516299	0.183522244	0.047182916	0.507386527
1820	1836	YGL229C	chrVII	-	TATA-less	TAF1-depleted	63	67050	67188	-138	YGL229C	299.5	NULL	0.001733589	0.215924939	NaN	0.080118314	0.215924939	NaN	0.215924939	0.080118314
1821	1837	YGL228W	chrVII	+	TATA-less	TAF1-enriched	241	67590	67552	-38	YGL228W	985.1	NULL	0.029184651	0.04128299	0.076031041	0.494997202	0.034572498	0.076031041	0.719568783	0.132006336
1822	1838	ST1062	chrVII	+	TATA-less	TAF1-enriched	46	74731	74551	-180	ST1062	161.5	NULL	0.12002519	0.033359567	0.283876475	0.036701192	0.487856663	0.329609605	0.776814004	0.665005542
1823	1839	orphan	chrVII	+	TATA-less	TAF1-depleted	159	74731	74691	-40	orphan	213.2	NULL	0.168923242	0.071491579	0.790241066	1	0.157299207	0.183522244	0.731370313	0.49783023
1824	1840	YGL225W	chrVII	+	TATA-containing	TAF1-enriched	13946	76884	76825	-59	YGL225W	977.3	NULL	0.214141414	0.008360374	0.049491231	0.085758003	0.670037641	0.044444444	0.931847255	0.4
1825	1841	YGL224C	chrVII	-	TATA-containing	TAF1-enriched	2333	78926	78966	-40	YGL224C	395.4	NULL	0.007800146	0.007800146	0.046730149	0.047417494	0.007910597	0.047417494	0.016594238	0.288844366
1826	1842	orphan	chrVII	+	TATA-less	TAF1-enriched	52	79345	79293	-52	orphan	32.9	NULL	0.798561763	0.349393711	0.507386527	0.792771379	0.083264517	0.065915952	0.172722365	0.694417686
1827	1843	YGL223C	chrVII	-	TATA-less	TAF1-enriched	65	80335	80378	-43	YGL223C	503.6	NULL	1	0.004952607	0.104329469	0.027362545	1	0.576150122	1	0.576150122
1828	1844	YGL222C	chrVII	-	TATA-less	TAF1-enriched	693	81195	81246	-51	YGL222C	1828.1	NULL	0.058551119	0.789711992	0.046730149	0.49783023	0.007910597	0.232774339	0.024602777	0.046730149
1829	1845	YGL221C	chrVII	-	TATA-containing	TAF1-enriched	12774	82276	82311	-35	YGL221C	2441.6	NULL	0.926292884	0.646407738	0.177015983	0.87832485	0.229119773	0.083264517	0.75585112	0.177015983
1830	1846	YGL219C	chrVII	-	TATA-less	TAF1-enriched	312	84232	84282	-50	YGL219C	2110.2	NULL	0.662108674	0.007154342	0.784889385	1	1	0.784889385	0.664432119	1
1831	1847	YGL216W	chrVII	+	TATA-less	TAF1-depleted	302	84634	84618	-16	YGL216W	149.9	NULL	0.032822933	0.008133895	0.083811901	1	0.863951761	0.065086726	0.192305942	0.048798093
1832	1848	orphan	chrVII	-	TATA-less	TAF1-enriched	3	87077	87252	-175	orphan	3.6	NULL	0.066124301	0.066124301	0.046853285	0.872600061	0.026118917	0.046853285	0.042254021	0.046853285
1833	1849	YGL215W	chrVII	+	TATA-less	TAF1-enriched	394	87552	87469	-83	YGL215W	570.2	NULL	0.001556573	0.001643552	0.005188608	NaN	0.001313653	0.080118314	NaN	0.080118314
1834	1850	YGL213C	chrVII	-	TATA-less	TAF1-enriched	149	91219	91264	-45	YGL213C	282	NULL	0.123712341	0.021167585	0.511319908	0.598161453	0.1423982	1	0.930861941	0.693529129
1835	1851	YGL212W	chrVII	+	TATA-less	TAF1-enriched	76	91487	91434	-53	YGL212W	104.4	NULL	0.008246738	0.19875925	0.692632784	0.356355957	0.145986278	1	0.345986525	0.894523556
1836	1852	YGL211W	chrVII	+	TATA-less	TAF1-enriched	261	92546	92505	-41	YGL211W	145.7	NULL	0.123046028	0.031291196	0.790882323	1	0.296048012	0.787615767	0.46833722	0.790882323
1837	1853	YGL210W	chrVII	+	TATA-less	TAF1-enriched	119	93755	93752	-3	YGL210W	451.6	NULL	0.010355673	0.433848066	NaN	0.080118314	0.215924939	0.080118314	0.215924939	NaN
1838	1854	ST4766	chrVII	-	TATA-less	TAF1-depleted	23	NA	94687	NA	ST4766	108.9	NULL	0.19875925	0.021625614	0.088675943	0.694417686	0.049990741	0.048798093	0.669489674	0.14972246
1839	1855	YGL209W	chrVII	+	TATA-containing	TAF1-depleted	252	95928	95806	-122	YGL209W	584.5	NULL	0.004866885	0.004697962	0.657788651	0.052107267	0.169604801	0.02677094	0.151869315	0.657788651
1840	1856	YGL208W	chrVII	+	TATA-less	TAF1-enriched	149	97334	97326	-8	YGL208W	168.8	NULL	0.932087071	0.251431859	0.357835467	0.895493084	0.798215076	1	0.197959327	0.353367292
1841	1857	XUT	chrVII	-	TATA-less	TAF1-enriched	9	98135	98144	-9	XUT	11.2	NULL	0.016161616	0.153535354	0.044444444	0.177777778	0.933333333	0.4	0.394938074	0.266666667
1842	1858	YGL207W	chrVII	+	TATA-less	TAF1-enriched	150	98924	98904	-20	YGL207W	2083.3	NULL	0.011408183	0.007049543	0.041310308	0.332921608	0.006945558	0.041310308	0.657313488	0.124220661
1843	1859	YGL206C	chrVII	-	TATA-less	TAF1-enriched	2725	107538	107587	-49	YGL206C	13594.4	NULL	0.337240128	0.931359902	0.133293185	0.183522244	0.296517172	0.046044853	1	0.784889385
1844	1860	ST4769	chrVII	-	TATA-less	TAF1-enriched	106	110307	110374	-67	ST4769	49.6	NULL	0.931847255	0.733196121	0.049491231	0.293325574	0.442292754	0.085758003	0.013134295	0.59928633
1845	1861	orphan	chrVII	-	TATA-less	TAF1-enriched	569	110648	110707	-59	orphan	28.6	NULL	0.774812202	0.388544773	1	0.878481743	0.56078558	0.878481743	0.174704398	0.878481743
1846	1863	YGL204C	chrVII	-	TATA-less	TAF1-enriched	7042	112028	112055	-27	YGL204C	1973.8	NULL	0.004133256	0.010733416	0.052107267	0.104329469	0.007921805	0.332921608	0.502334954	0.052107267
1847	1864	YGL203C	chrVII	-	TATA-less	TAF1-depleted	63	114703	114776	-73	YGL203C	563.9	NULL	0.864428679	0.021167585	0.430614455	0.359305232	0.046386593	0.512610438	0.443898466	0.430614455
1848	1865	YGL202W	chrVII	+	TATA-less	TAF1-enriched	15275	115969	115930	-39	YGL202W	6619.9	NULL	0.434894327	0.007154342	0.133293185	0.041979528	0.006842389	0.042651237	0.338129828	0.041979528
1849	1866	YGL201C	chrVII	-	TATA-less	TAF1-depleted	1740	120922	120959	-37	YGL201C	316.6	NULL	0.019816095	0.007800146	0.228361945	0.046730149	0.059003394	0.279641534	0.133675511	0.594729336
1850	1867	tK(CUU)G1	chrVII	-	TATA-less	-	0	NA	122261	NA	tK(CUU)G1	1.2	NULL	0.270289385	0.592560277	0.27650048	0.692632784	1	1	0.692632784	NA
1851	1868	YGL200C	chrVII	-	TATA-less	TAF1-enriched	8434	123300	123357	-57	YGL200C	3019.9	NULL	0.215924939	0.433848066	0.004915802	NaN	0.050186187	0.080118314	NaN	0.080118314
1852	1869	YGL198W	chrVII	+	TATA-less	TAF1-enriched	6634	123627	123584	-43	YGL198W	2651.4	NULL	0.441484761	0.008360374	0.06674615	0.294801992	0.233663465	0.793389781	0.733646789	0.694417686
1853	1870	YGL199C	chrVII	-	TATA-less	TAF1-enriched	435	124228	124245	-17	YGL199C	90.1	NULL	0.010030543	0.106024499	0.14972246	0.792771379	0.074024444	0.065915952	0.016832249	0.147232255
1854	1871	YGL197W	chrVII	+	TATA-less	TAF1-enriched	1456	124716	124647	-69	YGL197W	967.7	NULL	0.004040404	0.008246738	0.432023291	1	0.049185351	0.711111111	0.798215076	0.4
1855	1872	CUT587	chrVII	-	TATA-less	TAF1-enriched	452	131249	131283	-34	CUT587	72.5	NULL	0.797164177	0.058551119	0.690816272	0.351857931	0.197959327	0.786943898	0.86249023	0.353367292
1856	1873	YGL195W	chrVII	+	TATA-less	TAF1-enriched	15415	131544	131495	-49	YGL195W	669.2	NULL	0.423679582	0.010661334	0.1622505	0.326250455	0.184897599	0.206884586	0.061930587	0.480085003
1857	1874	YGL194C-A	chrVII	-	TATA-less	TAF1-enriched	489	140167	140168	-1	YGL194C-A	463.7	NULL	0.074024444	0.008360374	0.085758003	1	0.797516299	0.59928633	0.729976105	0.138408493
1858	1875	YGL194C	chrVII	-	TATA-less	TAF1-enriched	311	141749	141781	-32	YGL194C	114.2	NULL	0.932206034	0.046386593	0.238557044	0.114961001	0.060816949	0.238557044	0.548699	0.188991722
1859	1876	orphan	chrVII	-	TATA-less	TAF1-depleted	218	143896	144034	-138	orphan	347.5	NULL	0.602671521	0.016182519	0.483171819	0.893187858	0.928339172	0.079919784	0.2185229	0.483171819
1860	1877	orphan	chrVII	+	TATA-less	TAF1-enriched	91	144495	144384	-111	orphan	35.8	NULL	0.386476231	0.039415782	0.047417494	0.894849724	0.123046028	0.894849724	0.441484761	0.234230702
1861	1878	YGL191W	chrVII	+	TATA-less	TAF1-depleted	899	144914	144770	-144	YGL191W	1901.5	NULL	0.038364038	0.056297	0.226876582	0.888854163	0.436563363	0.68989587	0.667829275	0.226876582
1862	1879	CUT128	chrVII	+	TATA-less	TAF1-enriched	103	147895	147871	-24	CUT128	27.5	NULL	1	1	0.508708087	0.508708087	0.797516299	0.691728538	0.931847255	0.143471009
1863	1880	orphan	chrVII	+	TATA-less	TAF1-enriched	1	148250	148232	-18	orphan	27.1	NULL	0.201939802	0.932206034	0.088675943	0.145981945	0.008246738	1	0.266236144	0.1484791
1864	1881	YGL189C	chrVII	-	TATA-less	TAF1-enriched	2286	NA	149000	NA	YGL189C	1648.2	NULL	0.008246738	0.021396137	0.048798093	0.234230702	0.013460069	0.049491231	0.492330692	0.048798093
1865	1882	YGL187C	chrVII	-	TATA-less	TAF1-enriched	276	NA	150634	NA	YGL187C	2691.6	NULL	0.168158868	0.795375598	0.892152103	0.35033841	0.138056172	0.35033841	0.792412801	0.688967208
1866	1883	YGL186C	chrVII	-	TATA-containing	TAF1-depleted	4737	152764	152808	-44	YGL186C	1984.7	NULL	0.682828283	0.233663465	0.044444444	0.533333333	0.109090909	0.888888889	0.282828283	0.049491231
1867	1884	CUT129	chrVII	+	TATA-containing	TAF1-enriched	331	153223	153187	-36	CUT129	26.7	NULL	0.123046028	0.56969697	0.085758003	0.711111111	0.172722365	0.888888889	0.607225552	1
1868	1885	YGL185C	chrVII	-	TATA-containing	TAF1-enriched	418	154309	154319	-10	YGL185C	462.5	NULL	0.129595844	NaN	0.005188608	NaN	0.001688186	NaN	NaN	NaN
1869	1886	YGL182C	chrVII	-	TATA-less	TAF1-enriched	56	157569	157617	-48	YGL182C	13	NULL	0.146700539	0.551517708	0.14972246	0.694417686	0.549408625	0.359305232	0.932206034	0.790882323
1870	1887	YGL181W	chrVII	+	TATA-less	TAF1-enriched	221	157874	157859	-15	YGL181W	484.3	NULL	0.046784411	0.007800146	0.079919784	0.687084608	0.121711196	0.687084608	0.069974467	0.132006336
1871	1888	YGL179C	chrVII	-	TATA-containing	TAF1-depleted	165	165132	165154	-22	YGL179C	2199.6	NULL	0.033441628	0.007910597	0.049491231	0.048798093	0.073517488	0.065915952	0.931726391	0.048798093
1872	1889	orphan	chrVII	-	TATA-less	TAF1-enriched	166	NA	165560	NA	orphan	45.8	NULL	0.56969697	0.008360374	0.4	0.711111111	0.367676768	0.888888889	0.394938074	0.266666667
1873	1890	orphan	chrVII	+	TATA-less	TAF1-enriched	568	165943	165925	-18	orphan	5.2	NULL	0.109090909	0.496969697	1	0.432023291	0.394938074	0.533333333	1	0.266666667
1874	1891	ST4788	chrVII	-	TATA-less	TAF1-enriched	29	166073	166100	-27	ST4788	39.2	NULL	0.006338844	0.016594238	0.768624792	0.556298461	0.791268113	0.239316541	0.2523249	0.768624792
1875	1892	CUT130	chrVII	+	TATA-containing	TAF1-enriched	372	166765	166580	-185	CUT130	104.2	NULL	0.339899051	0.048783581	0.104870291	0.046730149	0.02741654	1	0.488422317	0.104870291
1876	1893	YGL178W	chrVII	+	TATA-less	TAF1-depleted	234	166765	166744	-21	YGL178W	153.9	NULL	0.007154342	0.007259955	0.042651237	0.657788651	0.007154342	1	0.785246408	1
1877	1894	YGL177W	chrVII	+	TATA-less	TAF1-enriched	27	167463	167306	-157	YGL177W	26.2	NULL	0.733646789	0.367676768	0.4	0.190345809	0.307332348	1	0.682828283	0.266666667
1878	1895	orphan	chrVII	+	TATA-less	TAF1-enriched	4900	167937	167848	-89	orphan	1661.7	NULL	0.214542019	0.005576156	0.413176151	0.135166272	0.214542019	0.135166272	0.005950856	0.413176151
1879	1896	YGL176C	chrVII	-	TATA-less	TAF1-depleted	31	173056	173124	-68	YGL176C	191	NULL	0.791651777	0.046784411	0.889235607	0.125525756	0.007366379	0.889235607	0.929832618	0.125525756
1880	1897	YGL173C	chrVII	-	TATA-less	TAF1-enriched	3985	NA	180436	NA	YGL173C	2251.1	NULL	0.004866885	0.004614763	0.02677094	0.027362545	0.004614763	0.027362545	0.010824063	0.027362545
1881	1898	YGL172W	chrVII	+	TATA-less	TAF1-enriched	304	180712	180668	-44	YGL172W	252.6	NULL	0.010555544	0.527272727	0.056006607	0.888888889	0.163636364	0.222222222	0.163636364	0.056006607
1882	1899	YGL171W	chrVII	+	TATA-less	TAF1-enriched	3418	182407	182356	-51	YGL171W	1547	NULL	0.547269697	0.006842389	1	0.046044853	0.298697556	0.046730149	0.007473611	0.501992689
1883	1900	YGL169W	chrVII	+	TATA-less	TAF1-enriched	415	186027	186000	-27	YGL169W	320.7	NULL	0.006338844	0.100004883	0.03605437	0.239316541	0.005950856	0.036701192	0.029264263	0.036701192
1884	1901	YGL167C	chrVII	-	TATA-less	TAF1-enriched	6295	190664	190840	-176	YGL167C	5733.1	NULL	0.007800146	0.008021847	0.18763233	0.145981945	0.193930852	0.690816272	0.931359902	0.048798093
1885	1902	YGL166W	chrVII	+	TATA-less	TAF1-enriched	114	191156	191118	-38	YGL166W	756.9	NULL	0.040120865	0.071491579	0.048798093	0.048798093	0.008246738	0.048106828	0.345986525	0.048106828
1886	1903	YGL164C	chrVII	-	TATA-less	TAF1-enriched	225	193295	193337	-42	YGL164C	115.4	NULL	0.339899051	0.550114935	1	0.693529129	0.121711196	0.357835467	0.550817954	0.507386527
1887	1904	YGL163C	chrVII	-	TATA-less	TAF1-enriched	197	196502	196530	-28	YGL163C	133.8	NULL	0.668385514	0.039767939	0.353367292	0.790882323	0.262823761	0.790882323	0.791651777	0.354866599
1888	1905	ST4796	chrVII	-	TATA-less	TAF1-enriched	11	197617	197655	-38	ST4796	33.7	NULL	0.551517708	0.931359902	0.293325574	1	0.670582894	0.430614455	0.493101793	0.694417686
1889	1906	YGL162W	chrVII	+	TATA-containing	TAF1-depleted	279	198136	198092	-44	YGL162W	185.2	NULL	0.057197149	0.020038949	1	0.691728538	0.549408625	0.499229169	0.346843113	0.508708087
1890	1907	YGL161C	chrVII	-	TATA-less	TAF1-enriched	1370	NA	200210	NA	YGL161C	1689.6	NULL	0.001556573	0.01012654	0.004915802	0.080118314	0.001556573	0.005188608	NaN	0.080118314
1891	1908	YGL159W	chrVII	+	TATA-less	TAF1-enriched	130	202735	202709	-26	YGL159W	305.7	NULL	0.007473611	0.789711992	0.353367292	0.688967208	0.296517172	0.424874689	0.861489297	0.786943898
1892	1909	YGL157W	chrVII	+	TATA-containing	TAF1-depleted	121	208973	208954	-19	YGL157W	1816.2	NULL	0.096790993	0.006537796	0.68122512	0.040643643	0.029184651	0.039979603	0.10548533	0.295641821
1893	1910	YGL154C	chrVII	-	TATA-less	TAF1-enriched	236	216063	216100	-37	YGL154C	280.2	NULL	0.004952607	0.029264263	0.148263844	0.872382973	0.004782003	0.055859225	1	0.027362545
1894	1911	YGL151W	chrVII	+	TATA-less	TAF1-enriched	553	217533	217479	-54	YGL151W	252.9	NULL	0.044802434	0.065817128	0.055234254	0.772829993	0.005950856	0.193930852	0.065817128	0.055234254
1895	1912	YGL150C	chrVII	-	TATA-less	TAF1-enriched	167	225511	225747	-236	YGL150C	1354.9	NULL	0.007581651	0.862982628	1	0.892152103	0.022555396	1	0.464757447	0.172327006
1896	1913	YGL148W	chrVII	+	TATA-less	TAF1-enriched	1264	226382	226370	-12	YGL148W	3832.2	NULL	0.185728553	0.184064687	1	0.767755389	0.006143194	0.139793337	0.922865701	0.035410671
1897	1914	CUT133	chrVII	+	TATA-less	TAF1-enriched	624	228914	228814	-100	CUT133	59.1	NULL	0.027125386	0.017280266	0.03605437	0.139793337	0.006143194	0.03605437	0.185728553	0.312321422
1898	1915	YGL146C	chrVII	-	TATA-less	TAF1-enriched	50	229637	229764	-127	YGL146C	53	NULL	0.492330692	0.931604881	0.14472819	0.14472819	0.862982628	0.353367292	0.071997747	0.786943898
1899	1916	YGL145W	chrVII	+	TATA-containing	TAF1-enriched	86	230241	230173	-68	YGL145W	405	NULL	0.027125386	0.007473611	0.208468351	0.046730149	0.015128341	0.046730149	0.020487551	0.046730149
1900	1917	YGL144C	chrVII	-	TATA-less	TAF1-enriched	100	234507	234528	-21	YGL144C	241.7	NULL	0.439039945	0.020262769	0.510019168	0.351857931	0.192305942	0.351857931	0.261963952	0.427765705
1901	1918	YGL143C	chrVII	-	TATA-less	TAF1-enriched	955	235938	235966	-28	YGL143C	261.7	NULL	0.199557256	0.008021847	1	0.68989587	0.303914253	0.047417494	0.795012172	0.48620496
1902	1919	YGL140C	chrVII	-	TATA-less	TAF1-enriched	10979	245153	245199	-46	YGL140C	149.9	NULL	0.045989475	0.013296732	0.895493084	0.353367292	0.033131861	0.511319908	0.731370313	0.18763233
1903	1920	YGL139W	chrVII	+	TATA-less	TAF1-enriched	871	245437	245402	-35	YGL139W	4873.3	NULL	1	0.007581651	0.044680647	0.044001861	0.007366379	0.044680647	0.194740405	1
1904	1921	YGL137W	chrVII	+	TATA-less	TAF1-enriched	199	249879	249841	-38	YGL137W	3865.1	NULL	0.015372288	0.005393812	0.283876475	0.665005542	0.005393812	0.283876475	0.12002519	0.283876475
1905	1922	YGL136C	chrVII	-	TATA-less	TAF1-enriched	78	253880	253914	-34	YGL136C	503.6	NULL	0.087748841	0.169686101	0.692632784	0.113846298	0.54363657	0.048798093	0.071491579	0.692632784
1906	1923	YGL135W	chrVII	+	TATA-less	TAF1-depleted	73834	254587	254577	-10	YGL135W	42388.4	NULL	0.004952607	0.004133256	0.02677094	0.659023837	0.004133256	0.027362545	0.413662403	0.02677094
1907	1924	YGL134W	chrVII	+	TATA-less	TAF1-enriched	643	255737	255573	-164	YGL134W	213.1	NULL	0.493101793	0.298697556	0.894849724	0.691728538	0.729506525	0.691728538	0.665005542	0.234230702
1908	1925	CUT592	chrVII	-	TATA-less	TAF1-enriched	9	257234	257288	-54	CUT592	80.7	NULL	0.348546687	0.931847255	0.694417686	0.59928633	0.798215076	0.359305232	0.863951761	0.694417686
1909	1926	YGL133W	chrVII	+	TATA-less	TAF1-depleted	109	257857	257537	-320	YGL133W	227.2	NULL	0.443898466	0.222804929	0.114961001	1	0.049185351	0.508708087	0.537638448	0.188991722
1910	1927	YGL131C	chrVII	-	TATA-containing	TAF1-enriched	140	265907	265889	18	YGL131C	395.3	NULL	0.046386593	0.007154342	0.67502412	0.67502412	0.544370146	1	0.923893342	0.041979528
1911	1928	YGL130W	chrVII	+	TATA-less	TAF1-enriched	1009	266148	266103	-45	YGL130W	676.3	NULL	0.007473611	0.007366379	0.345717816	0.501992689	0.095554416	0.139679141	0.795375598	0.345717816
1912	1929	YGL129C	chrVII	-	TATA-containing	TAF1-enriched	412	269099	269146	-47	YGL129C	1783	NULL	0.011408183	0.04128299	0.295641821	0.133293185	0.927191096	0.132006336	0.04128299	0.470486422
1913	1930	CUT134	chrVII	+	TATA-less	TAF1-enriched	12	269368	269252	-116	CUT134	9.9	NULL	0.204413415	0.2523249	0.036701192	0.48620496	0.332739927	0.889235607	0.929832618	0.070213707
1914	1931	YGL127C	chrVII	-	TATA-less	TAF1-enriched	3186	270740	270801	-61	YGL127C	696.4	NULL	0.040828988	0.008360374	0.048798093	0.084784996	0.147413673	0.792771379	0.345986525	0.048798093
1915	1932	orphan	chrVII	+	TATA-less	TAF1-enriched	153	271678	271650	-28	orphan	336.6	NULL	0.007259955	0.012022825	0.076031041	0.329609605	0.00924624	0.892845929	0.011560425	0.058495155
1916	1933	ST4814	chrVII	-	TATA-less	TAF1-enriched	191	272862	272881	-19	ST4814	71.1	NULL	0.033441628	0.074024444	0.533333333	0.190345809	0.214141414	0.888888889	0.798215076	0.044444444
1917	1934	CUT593	chrVII	-	TATA-less	TAF1-enriched	41	276865	277037	-172	CUT593	17.5	NULL	1	0.345986525	1	0.588809187	0.2645353	0.228361945	0.489996346	0.690816272
1918	1935	YGL123W	chrVII	+	TATA-less	TAF1-enriched	132536	277687	277558	-129	YGL123W	70682.6	NULL	0.006143194	0.029758067	0.035410671	0.03605437	0.005303894	0.035410671	0.218758005	0.419740503
1919	1936	orphan	chrVII	+	TATA-less	TAF1-depleted	186	278340	278337	-3	orphan	987.8	NULL	0.933333333	0.808080808	0.533333333	0.294801992	0.56969697	0.4	0.864900617	0.600401848
1920	1937	YGL122C	chrVII	-	TATA-less	TAF1-enriched	3301	280500	280569	-69	YGL122C	2076.9	NULL	0.001688186	0.001688186	0.005188608	0.080118314	0.001313653	0.005188608	NaN	NaN
1921	1938	CUT135	chrVII	+	TATA-less	TAF1-enriched	1100	280820	280812	-8	CUT135	233	NULL	0.122378978	0.147413673	0.048106828	0.690816272	0.007154342	0.895493084	0.492330692	0.357835467
1922	1939	YGL120C	chrVII	-	TATA-less	TAF1-enriched	3218	283937	283993	-56	YGL120C	3437.5	NULL	1	0.128645924	0.004915802	NaN	0.001313653	0.004915802	0.215924939	0.004915802
1923	1940	YGL119W	chrVII	+	TATA-less	TAF1-enriched	110	284422	284390	-32	YGL119W	1665.1	NULL	0.006143194	0.006143194	0.16078972	0.112351198	0.184897599	0.112351198	0.029758067	0.03605437
1924	1941	CUT136	chrVII	+	TATA-less	TAF1-enriched	300	NA	286133	NA	CUT136	113	NULL	0.190673275	0.192305942	0.494997202	0.887685742	0.256747856	1	0.657313488	0.676082741
1925	1942	YGL117W	chrVII	+	TATA-containing	TAF1-depleted	121	288446	288430	-16	YGL117W	334.4	NULL	0.040828988	0.797866593	0.508708087	0.792771379	0.201939802	1	0.394107149	0.359305232
1926	1943	orphan	chrVII	-	TATA-less	TAF1-enriched	5	289186	289382	-196	orphan	61.7	NULL	0.201939802	0.201939802	0.359305232	0.14972246	0.798561763	0.694417686	0.306482234	0.686130413
1927	1944	YGL116W	chrVII	+	TATA-less	TAF1-depleted	546	289703	289668	-35	YGL116W	415.2	NULL	0.541414544	0.224501127	0.676082741	0.494997202	0.517263322	1	0.659135465	0.676082741
1928	1945	YGL115W	chrVII	+	TATA-less	TAF1-enriched	807	291966	291940	-26	YGL115W	2019.7	NULL	0.428069831	0.005393812	0.768624792	0.657788651	0.02770872	0.657788651	0.220150713	0.093532513
1929	1946	YGL114W	chrVII	+	TATA-less	TAF1-enriched	65	293257	293218	-39	YGL114W	113.9	NULL	0.682828283	0.307332348	0.177777778	0.359305232	0.682828283	0.4	0.864665265	0.4
1930	1947	YGL113W	chrVII	+	TATA-less	TAF1-enriched	90	295926	295870	-56	YGL113W	435.7	NULL	1	0.005303894	0.124220661	0.767755389	0.017219911	0.871798602	0.022072114	0.06635304
1931	1948	YGL111W	chrVII	+	TATA-less	TAF1-enriched	374	300005	299951	-54	YGL111W	788.2	NULL	0.012022825	0.006338844	0.042651237	0.137134544	0.006945558	0.076031041	1	0.04332537
1932	1949	YGL110C	chrVII	-	TATA-containing	TAF1-depleted	284	303373	303432	-59	YGL110C	388.1	NULL	0.122563702	0.776342228	1	0.421881247	0.791268113	0.1622505	0.220150713	0.421881247
1933	1950	YGL108C	chrVII	-	TATA-containing	TAF1-enriched	435	304068	304106	-38	YGL108C	393.9	NULL	0.376759118	0.536101864	0.042651237	0.685167447	0.006842389	0.219338776	0.789711992	0.042651237
1934	1951	YGL107C	chrVII	-	TATA-less	TAF1-enriched	193	NA	306274	NA	YGL107C	451.4	NULL	0.183229817	0.220150713	0.070213707	0.421881247	0.009938798	0.421881247	0.919314259	0.06635304
1935	1952	YGL106W	chrVII	+	TATA-less	TAF1-enriched	23357	306578	306531	-47	YGL106W	2083.2	NULL	1	0.012812142	0.892152103	0.484695003	0.789711992	0.222376248	0.795737098	0.484695003
1936	1953	orphan	chrVII	-	TATA-containing	TAF1-depleted	28	306959	306988	-29	orphan	19.9	NULL	0.607225552	0.048783581	0.895810367	0.508708087	0.670582894	0.293325574	0.731830274	0.895810367
1937	1954	YGL105W	chrVII	+	TATA-less	TAF1-enriched	3569	307476	307414	-62	YGL105W	7265.4	NULL	0.017280266	0.005303894	0.03605437	0.03605437	0.005855932	0.035410671	0.015172523	0.419740503
1938	1955	YGL103W	chrVII	+	TATA-less	TAF1-enriched	255466	310989	310951	-38	YGL103W	22766	NULL	0.021063087	0.014580044	0.265205393	0.072149939	0.286844064	0.072149939	0.014580044	0.470486422
1939	1956	YGL101W	chrVII	+	TATA-containing	TAF1-enriched	508	312209	312181	-28	YGL101W	750	NULL	0.19875925	0.266236144	1	0.595883091	1	0.595883091	0.094316816	0.047417494
1940	1957	YGL100W	chrVII	+	TATA-less	TAF1-enriched	154	313248	313197	-51	YGL100W	919.1	NULL	0.106024499	0.525729278	0.357835467	0.512610438	1	0.048798093	0.525729278	1
1941	1958	CUT595	chrVII	-	TATA-less	TAF1-enriched	406	314204	314359	-155	CUT595	67.4	NULL	0.550114935	1	0.143471009	0.894194334	0.086628059	0.894194334	0.070985635	0.68989587
1942	1959	YGL099W	chrVII	+	TATA-less	TAF1-enriched	8233	314644	314597	-47	YGL099W	651.3	NULL	0.660928738	0.789711992	1	0.470486422	1	0.076031041	0.054950766	1
1943	1960	orphan	chrVII	+	TATA-less	TAF1-enriched	13494	316840	316788	-52	orphan	11954	NULL	0.001313653	0.001313653	0.004915802	0.004915802	0.001313653	0.004915802	0.001313653	0.004915802
1944	1961	YGL098W	chrVII	+	TATA-containing	TAF1-enriched	94	317357	317271	-86	YGL098W	261.2	NULL	0.074024444	0.008360374	1	0.044444444	0.109090909	0.044444444	0.233663465	0.432023291
1945	1962	ST1139	chrVII	+	TATA-less	TAF1-enriched	171	320081	320017	-64	ST1139	1657	NULL	0.058102437	0.015051346	0.015975041	0.802587349	0.003061939	0.802587349	0.694095468	0.136037128
1946	1963	YGL097W	chrVII	+	TATA-less	TAF1-enriched	246	321786	321739	-47	YGL097W	815.7	NULL	0.003329187	0.003261123	0.136037128	0.015975041	0.003061939	0.015975041	0.31430466	0.015494295
1947	1964	orphan	chrVII	-	TATA-less	TAF1-depleted	439	323205	323224	-19	orphan	14.3	NULL	0.798561763	0.443898466	0.512610438	0.895810367	0.60913007	1	0.148125677	0.14972246
1948	1965	ST4827	chrVII	-	TATA-less	TAF1-enriched	116	324192	324222	-30	ST4827	38.7	NULL	0.733646789	0.282828283	0.600401848	1	0.460606061	0.533333333	0.733646789	0.508708087
1949	1966	orphan	chrVII	+	TATA-less	TAF1-enriched	105	325007	324955	-52	orphan	19.8	NULL	0.551517708	0.394938074	0.088888889	0.044444444	0.072727273	0.432023291	0.609758799	0.116073943
1950	1967	orphan	chrVII	-	TATA-less	TAF1-enriched	2	NA	326476	NA	orphan	15.6	NULL	0.268767553	0.758931305	1	0.049491231	0.668938973	0.359305232	1	0.359305232
1951	1968	YGL095C	chrVII	-	TATA-less	TAF1-enriched	243	330646	330657	-11	YGL095C	799.1	NULL	0.004866885	0.145340804	0.421881247	0.260832152	0.503677558	0.027362545	1	1
1952	1969	YGL094C	chrVII	-	TATA-containing	TAF1-enriched	680	334596	334644	-48	YGL094C	447.7	NULL	0.789711992	0.596577576	0.295641821	0.671784971	0.125786425	0.193930852	0.472713923	0.295641821
1953	1970	YGL093W	chrVII	+	TATA-less	TAF1-enriched	552	334874	334848	-26	YGL093W	320.6	NULL	0.298697556	0.020713285	0.049491231	0.188991722	0.550817954	0.895810367	0.147413673	0.048798093
1954	1971	CUT596	chrVII	-	TATA-less	TAF1-enriched	142	337578	337595	-17	CUT596	26	NULL	0.019373319	0.007154342	0.103741678	1	0.224501127	0.208468351	0.257624077	0.208468351
1955	1972	YGL092W	chrVII	+	TATA-less	TAF1-enriched	2924	NA	337823	NA	YGL092W	437.9	NULL	0.733196121	0.008021847	0.06674615	0.088888889	0.072504128	0.049491231	0.105411524	0.357835467
1956	1973	orphan	chrVII	-	TATA-less	TAF1-enriched	20	345710	345742	-32	orphan	5.5	NULL	0.127940778	0.923674173	0.657866243	0.098521021	0.446575646	0.054976166	0.849086527	0.30144367
1957	1974	YGL088W	chrVII	+	TATA-containing	TAF1-depleted	43607	346020	345986	-34	YGL088W	827332.2	NULL	0.001313653	NaN	0.004915802	NaN	0.001688186	NaN	NaN	0.005188608
1958	1975	CUT137	chrVII	+	TATA-less	TAF1-enriched	4	346565	346531	-34	CUT137	17.9	NULL	0.682828283	0.888888889	1	0.600401848	0.233663465	0.4	0.367676768	1
1959	1976	YGL087C	chrVII	-	TATA-less	TAF1-enriched	887	346939	346947	-8	YGL087C	1586	NULL	0.003329187	0.002685983	0.015975041	0.802587349	0.003261123	0.802587349	0.191694602	0.802587349
1960	1977	YGL086W	chrVII	+	TATA-less	TAF1-enriched	197	347209	347187	-22	YGL086W	407	NULL	0.797164177	0.007800146	0.790882323	1	0.547269697	0.184897599	0.596577576	0.894849724
1961	1978	YGL085W	chrVII	+	TATA-containing	TAF1-enriched	112	349635	349573	-62	YGL085W	113.5	NULL	0.124377909	0.268767553	0.359305232	0.088675943	0.932206034	0.293325574	0.441484761	0.357835467
1962	1979	YGL084C	chrVII	-	TATA-less	TAF1-enriched	1834	352290	352344	-54	YGL084C	381.1	NULL	0.025914063	0.007690497	0.083811901	0.290346834	0.040120865	0.504711414	0.215054122	0.047417494
1963	1980	YGL083W	chrVII	+	TATA-less	TAF1-enriched	244	353038	352990	-48	YGL083W	586.4	NULL	0.797164177	0.008133895	0.4291953	0.598161453	0.261963952	0.790241066	0.340778614	0.357835467
1964	1981	ST4836	chrVII	-	TATA-less	TAF1-enriched	212	355508	355538	-30	ST4836	95.3	NULL	0.147413673	0.349393711	0.14972246	0.14972246	0.071997747	1	0.268767553	0.512610438
1965	1982	YGL082W	chrVII	+	TATA-less	TAF1-depleted	126	355779	355748	-31	YGL082W	483.3	NULL	0.129595844	1	0.080118314	NaN	0.001733589	0.080118314	0.215924939	0.080118314
1966	1983	YGL080W	chrVII	+	TATA-less	TAF1-depleted	2508	358604	358564	-40	YGL080W	3077.9	NULL	0.863469774	0.06745128	0.048106828	0.792147392	0.008133895	0.356355957	0.302187416	0.048106828
1967	1984	YGL079W	chrVII	+	TATA-less	TAF1-enriched	697	359469	359434	-35	YGL079W	283.6	NULL	0.025124453	0.65792405	0.143471009	0.143471009	0.020487551	0.046044853	0.789711992	0.68989587
1968	1985	YGL078C	chrVII	-	TATA-less	TAF1-enriched	750	361877	361924	-47	YGL078C	17960.3	NULL	0.54363657	1	0.041979528	0.891444622	0.192305942	0.676082741	0.791268113	0.042651237
1969	1986	ST1158	chrVII	+	TATA-less	TAF1-depleted	28	362277	362155	-122	ST1158	46.9	NULL	0.267082584	0.607863471	0.895810367	0.430614455	0.93196748	0.114961001	0.086067568	0.895810367
1970	1987	YGL077C	chrVII	-	TATA-containing	TAF1-depleted	701	NA	364040	NA	YGL077C	1500.2	NULL	0.021167585	0.04838244	0.693529129	0.048798093	0.931726391	0.113846298	0.668938973	0.137134544
1971	1988	YGL076C	chrVII	-	TATA-less	TAF1-enriched	79800	NA	366022	NA	YGL076C	125526.6	NULL	0.001643552	0.001556573	0.004915802	NaN	0.001313653	NaN	NaN	NaN
1972	1989	orphan	chrVII	-	TATA-less	TAF1-enriched	1148	366449	366468	-19	orphan	500.5	NULL	0.798215076	0.544370146	0.512610438	0.895810367	0.551517708	0.048798093	0.551517708	0.14972246
1973	1990	CUT140	chrVII	+	TATA-less	TAF1-depleted	0	366748	366701	-47	CUT140	9.7	NULL	0.282828283	0.061271395	0.894849724	1	0.863951761	0.177777778	0.682408082	0.508708087
1974	1991	YGL075C	chrVII	-	TATA-less	TAF1-enriched	112	368236	368298	-62	YGL075C	48.2	NULL	0.460606061	0.367676768	0.4	0.600401848	0.460606061	0.4	0.460606061	0.533333333
1975	1992	YGL073W	chrVII	+	TATA-less	TAF1-enriched	93	368739	368669	-70	YGL073W	259.7	NULL	0.012335776	0.007910597	0.176565351	0.228361945	0.024084965	0.046044853	0.345126713	0.06260547
1976	1993	YGL072C	chrVII	-	TATA-less	TAF1-enriched	649	371195	371222	-27	YGL072C	349	NULL	0.348546687	0.026979768	0.177777778	0.895493084	0.148125677	0.711111111	0.394107149	0.266666667
1977	1994	YGL071W	chrVII	+	TATA-less	TAF1-depleted	1233	NA	371564	NA	YGL071W	86.3	NULL	0.153535354	0.551517708	0.06674615	0.044444444	0.233663465	0.793389781	0.173477636	0.533333333
1978	1995	YGL070C	chrVII	-	TATA-less	TAF1-enriched	603	374828	374852	-24	YGL070C	1005	NULL	0.004614763	0.004614763	0.027362545	0.027362545	0.007921805	0.02677094	0.004952607	0.576150122
1979	1996	YGL068W	chrVII	+	TATA-less	TAF1-depleted	8445	375082	375040	-42	YGL068W	1294	NULL	0.003261123	0.003261123	0.015494295	0.802587349	0.360740849	0.015975041	0.015303492	0.015975041
1980	1997	YGL067W	chrVII	+	TATA-less	TAF1-enriched	313	376081	375929	-152	YGL067W	371.6	NULL	0.020487551	0.008021847	0.691728538	0.351857931	0.122378978	1	0.859946052	1
1981	1998	YGL066W	chrVII	+	TATA-less	TAF1-enriched	242	377656	377507	-149	YGL066W	520.1	NULL	1	0.008360374	1	0.895810367	0.797164177	0.356355957	0.104798141	0.895172885
1982	1999	YGL065C	chrVII	-	TATA-less	TAF1-enriched	149	381251	381316	-65	YGL065C	1025.1	NULL	0.864665265	0.007259955	0.595883091	0.430614455	0.02770872	0.065915952	0.548699	0.595883091
1983	2000	YGL064C	chrVII	-	TATA-less	TAF1-enriched	215	383200	383215	-15	YGL064C	56	NULL	0.118361567	0.715823013	0.344156576	1	0.593777998	0.137134544	0.427199637	0.89108562
1984	2001	YGL063W	chrVII	+	TATA-less	TAF1-enriched	195	383635	383460	-175	YGL063W	163.6	NULL	0.798561763	0.008133895	0.238557044	0.792771379	0.172722365	0.234230702	0.232018345	0.188991722
1985	2002	orphan	chrVII	+	TATA-less	TAF1-enriched	224	392221	392200	-21	orphan	705.5	NULL	0.003061939	0.003261123	0.015494295	0.033368235	0.002685983	0.015975041	0.147320903	0.015494295
1986	2003	orphan	chrVII	-	TATA-less	TAF1-enriched	88	393662	393681	-19	orphan	19.7	NULL	0.932206034	1	0.14972246	0.691728538	0.106024499	1	0.733196121	0.14972246
1987	2004	YGL058W	chrVII	+	TATA-less	TAF1-enriched	744	393987	393918	-69	YGL058W	1189.4	NULL	0.033441628	0.049990741	0.359305232	0.1484791	0.668385514	0.14972246	0.230364065	0.508708087
1988	2005	YGL057C	chrVII	-	TATA-less	TAF1-enriched	496	395789	395802	-13	YGL057C	177.3	NULL	0.304773202	0.229533472	0.291840545	0.594729336	0.124377909	0.048798093	0.346843113	0.598161453
1989	2006	YGL056C	chrVII	-	TATA-less	TAF1-depleted	7452	397658	397713	-55	YGL056C	1242.5	NULL	0.055847711	0.030987496	0.893526535	0.892152103	0.08214322	0.892152103	0.325355348	0.107123399
1990	2007	YGL055W	chrVII	+	TATA-containing	TAF1-depleted	16505	398668	398566	-102	YGL055W	47330.2	NULL	0.005855932	0.101377707	0.03605437	0.419740503	0.027125386	0.419740503	0.774424766	0.03605437
1991	2008	tE(UUC)G2	chrVII	+	TATA-less	-	0	NA	401640	NA	tE(UUC)G2	0	NA	NA	NA	NA	NA	NA	NA	NA	NA
1992	2009	YGL050W	chrVII	+	TATA-less	TAF1-enriched	426	405785	405746	-39	YGL050W	516.7	NULL	1	0.297817462	0.301326595	0.89108562	0.524071423	0.042651237	0.480330338	0.301326595
1993	2010	YGL049C	chrVII	-	TATA-less	TAF1-enriched	1866	409719	409740	-21	YGL049C	2661.7	NULL	0.143118038	0.045989475	0.348808623	0.107123399	0.795737098	0.077974734	0.289756002	0.044001861
1994	2011	YGL048C	chrVII	-	TATA-less	TAF1-enriched	4413	411271	411314	-43	YGL048C	4191.9	NULL	0.007581651	0.486034034	0.081865671	0.081865671	0.489996346	0.499229169	0.605940351	0.690816272
1995	2012	orphan	chrVII	-	TATA-less	TAF1-enriched	14	412070	412105	-35	orphan	30.6	NULL	0.199557256	0.443898466	0.238557044	0.792771379	0.124377909	0.1484791	0.346843113	0.895810367
1996	2013	orphan	chrVII	-	TATA-less	TAF1-enriched	136	413507	413595	-88	orphan	4	NULL	0.92402728	0.504430999	0.261651091	0.179712495	0.906401031	0.261651091	0.56172011	0.261651091
1997	2014	YGL044C	chrVII	-	TATA-less	TAF1-enriched	89	417224	417242	-18	YGL044C	724.8	NULL	0.008246738	0.008133895	0.353367292	0.048798093	0.021167585	0.048798093	0.099877403	0.083811901
1998	2015	YGL043W	chrVII	+	TATA-less	TAF1-enriched	576	417493	417461	-32	YGL043W	1175.7	NULL	0.003261123	0.084282998	1	0.802587349	0.361938266	0.802587349	0.595883091	0.872382973
1999	2016	YGL041W-A	chrVII	+	TATA-less	TAF1-enriched	907	418848	418809	-39	YGL041W-A	1204.6	NULL	0.004866885	0.173058229	0.027362545	0.518605016	0.004614763	0.576150122	1	0.02677094
[truncated: 3,980 more rows]
