# Supplementary material for: Ssl2/TFIIH function in transcription start site scanning by RNA polymerase II in Saccharomyces cerevisiae
Source: eLife. 2021 Oct 15;10:e71013. doi: 10.7554/eLife.71013 (PMC8589449; doi:10.7554/eLife.71013)
Supplement: Figure 5—figure supplement 2—source data 10. [file elife-71013-fig5-figsupp2-data10.csv]

	wider_sig	narrower_sig
E1103G	1293	-747
H1085Y	1336	-958
L225P	603	-181
N230D	539	-1299
N230I	1037	-146
D522V	405	-918
R636C	506	-165
Y750	329	-946
