# Supplementary material for: Ssl2/TFIIH function in transcription start site scanning by RNA polymerase II in Saccharomyces cerevisiae
Source: eLife. 2021 Oct 15;10:e71013. doi: 10.7554/eLife.71013 (PMC8589449; doi:10.7554/eLife.71013)
Supplement: Figure 5—source data 3. [file elife-71013-fig5-data3.csv]

	ssl2 L225P	ssl2 N230D	ssl2 N230I	ssl2 D522V	ssl2 R636C	ssl2 Y750	rpb1 E1103G	rpb1 H1085Y
2	4	8	-5	29	13	-36	5	15
4	0	0	8	-1	0	-2	-2	8
5	0	7	1	3	0	5	9	9
6	-21	-21	-20	0	9	15	-21	49
8	-19	-3	9	3	12	-10	6	-5
9	-10	-22	3	-12	-2	-25	-22	-5
10	0	-16	0	-6	0	-4	5	13
11	-11	6	7	7	-10	6	15	-26
13	5	-9	5	-9	0	1	-2	-2
14	3	4	3	4	3	-1	9	0
15	1	3	3	3	3	-5	11	0
17	-3	-7	-3	-3	0	-2	2	-2
19	-3	1	4	1	-4	2	7	-10
20	0	4	0	4	0	-4	18	-9
22	0	-7	0	-7	-7	0	-6	11
23	0	5	9	-2	0	-2	5	4
24	9	0	6	0	0	-4	0	0
25	8	2	2	0	1	-9	10	-1
26	6	-4	8	-4	-2	-1	8	2
27	5	5	5	5	-3	-2	6	-22
28	-3	25	3	18	0	9	22	-12
29	-8	-5	-8	-5	-4	-5	3	1
30	2	2	11	2	9	0	5	25
32	4	-17	13	-17	4	-12	5	24
33	0	-9	0	-9	2	-5	-6	0
34	0	36	0	1	-2	-1	12	-9
36	22	4	-24	3	-7	80	-14	-21
37	2	1	12	1	2	0	-7	4
38	5	5	29	0	0	5	38	-16
39	-25	-8	-9	-11	-23	-31	-8	-21
42	-11	11	-11	12	9	6	3	-11
43	1	-1	2	2	0	1	22	2
44	-7	0	1	1	-2	4	4	-2
45	0	-4	-1	-4	-8	-4	-4	-12
46	32	-6	49	-6	4	-2	-1	47
47	9	-4	9	-4	9	-6	-5	-1
48	6	-31	5	-31	9	-42	-15	50
50	-4	-6	-4	-6	-4	-6	-3	10
51	7	7	6	7	7	6	-4	5
52	5	4	8	0	5	0	6	12
53	0	2	2	2	-2	0	18	-2
54	3	2	-7	1	-7	3	1	-13
55	5	-29	5	-33	-12	-4	-30	1
56	-18	-13	8	-13	-11	-18	-12	8
57	3	-2	3	-2	3	-4	4	5
58	18	-6	-6	-6	58	-6	-6	60
59	-3	-7	9	-7	0	-3	0	2
61	-5	5	-2	5	-5	5	29	-10
62	-6	-12	23	-15	2	-15	-12	83
63	-2	0	12	3	8	-3	-1	-32
64	0	0	0	0	0	0	18	-4
65	-4	-9	3	-2	0	-2	-2	-5
66	5	15	5	6	3	26	34	5
67	6	0	10	-4	8	-4	22	-5
68	5	-13	3	-3	11	-13	-13	31
69	-2	-2	2	0	0	0	-12	47
70	4	-16	13	-17	4	-8	10	13
71	3	-4	4	-6	4	3	3	8
72	0	13	2	13	2	13	10	-3
73	0	-11	9	-11	0	-11	2	-5
74	0	-1	0	6	0	-8	8	-8
75	5	-126	1	-161	5	-120	-38	5
76	-9	-24	10	-24	-6	-23	-1	34
77	9	-25	15	-19	0	-25	-17	20
78	0	-18	-12	-13	-4	-5	-10	-12
79	0	-5	11	-15	-4	0	7	-7
80	0	2	0	4	0	0	5	27
82	11	0	10	-37	10	-37	-24	10
84	0	0	3	0	3	0	1	8
85	-1	0	-2	0	-2	0	5	40
86	32	10	-2	0	-6	10	0	-71
88	47	-6	120	-5	11	-32	-6	-23
89	12	4	14	2	6	1	2	4
90	2	-21	11	-24	0	-21	-20	5
91	12	-15	5	-17	-3	0	40	-21
92	15	-5	21	0	4	-1	-2	20
93	0	-1	0	7	0	4	-1	-1
94	6	-12	4	-18	-3	-11	-12	-6
96	-7	-12	-5	-7	1	0	-7	0
97	9	8	17	8	3	-2	8	-2
98	8	-5	-19	-7	10	-6	-5	9
99	5	-5	5	-4	1	-6	18	-6
100	0	0	0	-8	0	-3	7	-4
102	0	24	0	13	0	4	21	-5
103	4	4	8	4	0	11	9	-4
105	0	-12	0	-14	3	-12	1	11
106	0	9	0	9	0	2	17	12
107	0	-17	19	-14	12	0	-11	16
110	6	19	7	5	7	10	10	7
111	0	-8	0	-8	0	-7	-5	-8
113	-1	4	6	4	0	0	6	-1
114	9	-28	11	-27	7	-28	-15	6
115	-4	-7	-4	2	-4	2	3	-18
116	0	0	-2	0	0	0	-8	4
117	2	-8	11	0	2	0	-3	11
118	14	-3	14	-1	-1	-1	19	11
119	-7	-57	9	-13	0	-128	-115	-131
122	10	-3	17	5	5	10	2	18
123	2	-2	2	-2	0	-2	1	2
124	5	5	3	4	0	2	11	0
125	-6	0	8	-4	-7	1	13	-11
126	6	-5	-7	0	-8	0	-3	-4
127	0	-6	4	-6	2	0	-3	8
128	94	0	19	-1	7	0	10	135
129	-9	-2	-12	-12	-6	-11	9	3
130	6	-34	9	-34	3	-12	-28	14
132	0	10	0	2	0	0	57	-5
135	6	12	0	7	0	5	13	-4
136	0	-1	0	2	0	2	2	0
139	-3	5	-2	5	-4	0	5	-3
142	5	-5	5	-5	0	-5	3	-15
144	19	-10	17	2	9	-6	-3	-22
145	2	-20	2	-20	2	-20	-11	2
146	14	-4	18	-4	20	-2	9	24
147	6	1	9	4	9	-3	2	14
149	95	-12	73	-20	23	-7	-7	-9
150	-22	10	-16	-27	7	-22	-11	4
151	-1	0	18	101	-2	-5	-3	1
152	-3	6	-11	7	-3	6	20	-47
154	0	-9	-1	-9	2	-9	-8	-30
155	-7	-6	5	-6	-5	0	19	-5
156	-132	-8	-27	-141	2	-141	38	82
159	6	19	7	5	-1	14	20	7
160	5	-5	4	-5	0	-1	-3	8
162	1	-6	3	-6	3	-1	-6	-9
163	2	17	-9	19	-3	17	14	-9
164	-1	-1	-1	0	-1	0	6	-7
165	1	16	11	18	3	11	16	8
166	5	-28	5	-10	-1	-10	-14	-1
167	0	-15	0	-12	0	-3	-1	1
168	58	-30	-6	43	0	0	-9	-5
169	2	1	9	-8	-9	2	1	-26
170	0	5	-8	13	0	0	17	-8
171	-5	-10	-12	-9	-10	-12	-5	4
172	-27	-6	0	-58	0	5	5	-21
174	13	-8	19	-8	-1	-8	-1	-8
176	-6	-3	27	22	-2	-2	-5	-18
177	0	10	5	3	0	3	5	0
178	3	-2	3	-2	3	52	21	80
179	3	-3	7	-3	7	-4	6	-1
180	8	-6	8	-7	4	-7	-6	0
181	-3	-3	-3	-6	-14	0	-10	-17
183	-6	4	-8	7	-11	17	31	-20
184	0	3	3	3	0	0	2	1
185	-6	-26	-6	-26	-10	-26	-42	20
186	4	3	1	3	4	0	-4	-8
187	15	1	11	0	-7	-47	-3	40
188	0	-4	9	-4	0	0	-11	-41
192	4	2	0	-1	0	0	6	58
194	23	-85	73	-88	-57	-75	-113	0
195	-7	0	0	-1	4	-3	3	40
196	4	-13	4	-13	-5	-13	-13	7
197	17	-23	4	-47	1	-3	-44	-92
200	-71	23	103	-14	-7	10	76	-25
201	0	-3	1	-3	1	-3	15	-13
202	6	-11	0	-3	0	-9	-18	8
203	-14	13	6	0	0	0	13	-27
204	1	0	0	0	6	0	0	-12
205	6	-8	18	-6	6	-4	6	17
207	0	-19	23	-18	10	-6	-27	-1
209	0	0	2	0	0	-35	-25	18
210	-4	-1	0	-6	0	-6	2	1
212	0	0	0	0	0	0	-9	-13
215	13	6	10	4	0	-4	10	19
216	13	-12	22	-12	1	-11	-11	18
217	0	-9	0	-7	-4	-5	-9	-8
218	6	-12	12	-1	0	4	-12	18
221	5	-4	5	-4	0	1	-7	5
224	0	-2	5	3	3	-6	2	5
225	2	-45	-16	-9	-4	-53	-41	1
226	-6	-5	2	-6	0	-1	13	-2
227	7	9	1	14	0	-1	9	-10
228	3	-13	3	-8	-10	-11	-21	7
230	0	-7	2	-4	2	-4	4	-4
231	8	-79	8	-81	0	3	-79	-26
232	4	-61	12	-33	7	-54	-32	12
235	-2	9	94	10	-8	24	19	135
236	9	9	-14	12	0	18	21	-9
237	-21	-25	4	-29	6	-2	-25	20
238	20	-1	21	-1	7	11	14	12
241	-45	-1	-22	-55	0	-9	0	-20
242	0	-4	0	-4	0	-4	-4	-15
243	4	6	4	7	2	8	4	2
245	-4	-11	26	-11	24	-11	1	12
246	1	-5	1	-7	0	-10	8	3
247	0	-3	0	-2	0	0	-3	0
249	10	-25	5	-21	0	-7	-21	-3
251	-4	1	11	1	7	-8	4	-5
252	8	8	2	8	3	-3	35	-33
253	-38	-4	1	-52	-10	-85	-53	-26
255	0	-16	-4	-7	-5	-7	-16	7
257	18	-2	0	-9	0	-6	27	-16
258	6	-30	10	-30	1	-26	-25	6
259	-11	18	6	-12	3	5	4	-2
261	-10	2	-10	2	0	-6	12	-8
263	-10	-10	14	-10	13	-10	-10	-1
265	0	-5	0	4	0	-5	0	-6
266	6	-12	11	1	3	1	-12	7
267	4	34	34	49	9	-13	34	-74
269	0	-4	3	-7	0	-7	2	-2
270	13	4	11	2	10	13	6	15
272	110	9	110	3	32	7	16	110
273	16	0	16	-17	16	-4	11	-6
274	1	0	73	0	0	18	19	64
275	1	-4	-2	-7	-2	-7	0	-2
276	11	-12	9	-9	-5	-1	-12	-15
277	5	3	18	-7	0	28	-26	23
278	-2	5	-2	-1	-2	2	22	2
279	0	-1	12	-1	2	-1	3	48
281	0	0	1	1	3	0	0	-5
282	0	7	9	-4	0	9	1	-29
284	-3	1	-7	1	-3	-3	1	-9
285	0	0	0	0	0	0	3	-2
286	0	-29	13	-19	0	-31	-13	-8
288	2	-3	2	-3	2	-3	-3	-1
290	-6	91	-48	-2	4	1	16	94
291	-1	-1	4	-1	4	-1	-1	4
293	6	-13	9	-7	6	-11	-9	19
294	4	0	4	6	5	5	17	11
295	2	0	-4	0	-6	0	0	-10
296	-2	22	-3	29	-3	9	15	-1
298	2	-3	20	-4	2	-1	-4	20
299	10	0	0	5	0	0	9	0
301	3	-3	4	-6	0	-5	6	128
302	18	-2	29	-7	7	0	-7	34
303	1	-6	2	-7	-5	-6	2	-7
304	18	0	18	-10	14	0	0	31
305	0	0	0	0	-1	0	4	-5
307	3	-7	8	6	-2	-15	-7	3
308	5	-8	5	-8	9	-8	-2	-9
310	-4	2	0	-26	0	-1	-21	10
311	0	3	1	3	0	0	15	-4
312	8	-11	18	-13	16	-11	1	0
314	3	9	0	7	0	5	5	0
315	-6	-9	-4	0	-2	-10	-1	31
316	0	1	0	1	0	-5	1	1
317	11	-3	11	0	3	0	6	8
318	0	-8	-3	-8	-3	-3	-9	0
319	22	6	15	-3	9	6	6	25
320	-10	20	12	2	-8	-10	-9	-11
321	-7	-9	-18	10	0	0	-60	-26
322	9	-13	8	-23	9	-24	-1	21
323	-10	-7	-2	3	-2	-10	-7	-10
324	0	-15	23	-7	0	-7	-5	32
329	44	-2	45	0	11	0	80	33
330	0	-6	0	-5	4	-6	0	4
331	4	4	3	4	5	0	13	-5
332	-15	35	42	-11	-7	-3	2	-4
333	-2	7	0	0	3	-2	17	8
334	-2	7	-2	-2	7	13	3	27
335	9	-8	25	2	-1	-6	15	7
336	-1	0	0	0	0	0	4	-3
337	0	-8	3	3	7	-9	-8	3
338	-6	-7	0	0	0	-7	-2	4
339	5	1	3	0	1	1	10	27
340	0	-3	3	0	-1	-3	14	0
341	5	-9	24	-9	3	-9	0	-9
342	0	-5	0	-11	0	-12	-4	0
343	0	-2	27	0	0	0	2	3
344	-6	-3	-6	-3	10	-3	-3	1
345	-5	5	4	4	14	-1	-7	16
346	0	3	12	3	0	13	13	20
347	-2	-7	4	-8	0	0	7	-2
348	0	-12	-3	-12	0	-10	-12	2
351	0	-1	10	-5	0	5	6	2
354	0	-11	1	-7	0	-10	-4	-7
355	0	0	0	0	-6	2	2	-5
356	8	-2	6	-2	1	-6	-4	-10
357	6	0	24	0	28	3	10	48
358	0	6	24	-4	0	10	2	-6
359	1	-7	3	-17	-16	-12	14	1
360	6	-9	54	-15	-3	-7	1	0
361	-9	-9	-2	-9	0	-9	-3	0
363	-6	-15	-10	-19	27	-15	26	17
364	0	-20	0	-14	1	-8	-11	13
366	0	2	0	9	9	2	9	24
367	13	8	-10	7	5	1	1	20
368	-45	-14	-48	-51	-7	-38	-27	0
369	2	0	1	-1	-8	0	12	-7
370	-40	-53	-40	-58	-24	-53	-15	-42
372	0	-5	0	-5	0	-2	5	-5
373	-2	4	9	2	-2	7	9	-2
374	26	1	9	-24	-1	-7	-5	1
375	-12	-8	3	0	3	-17	-8	-12
377	3	-9	-1	-3	0	-7	-9	4
378	8	-8	8	-6	4	-6	3	17
379	2	3	8	3	3	6	7	11
380	28	13	32	5	1	7	20	19
381	1	-10	6	-13	5	-10	-10	6
382	-135	-15	-126	-134	-119	-139	-13	59
383	-13	-3	3	-8	-2	-9	-5	3
384	1	-4	17	0	5	-12	5	-20
386	-12	-14	-19	23	-7	-14	-9	-15
387	2	6	2	3	-2	-7	3	4
389	12	23	12	-2	1	-4	48	71
390	-3	5	-3	5	-3	0	0	23
391	0	-7	-4	-5	0	-12	1	-10
393	2	-4	2	-5	2	-5	11	-8
394	0	1	-2	-3	0	-10	-1	-11
395	1	-2	4	3	-2	-2	-2	-2
397	4	1	2	-5	-5	1	8	-5
398	0	-8	0	-6	3	-9	-3	4
399	-5	3	-4	6	-5	2	14	3
400	0	4	8	4	5	0	4	7
401	9	-3	0	-3	0	0	-8	-12
402	26	-11	81	-11	11	-11	35	39
403	-16	-10	-2	-10	-10	-11	2	-8
404	0	-13	0	-23	0	-6	-8	0
405	31	0	22	-53	0	0	20	-58
406	-1	-3	-2	1	-4	1	8	-9
407	0	4	2	1	0	0	-3	-2
408	-3	0	-6	0	-3	2	0	-11
409	0	-5	6	-4	6	-13	-5	-2
410	-57	-5	-4	-26	-3	-17	-24	-3
411	0	-2	0	-2	0	-1	6	0
412	-3	3	2	7	2	3	9	0
413	6	-2	0	-2	0	-1	-2	29
414	4	-19	8	-19	4	-10	-3	4
415	-11	-14	0	-15	-5	0	-9	-28
417	0	-24	12	-61	4	-4	-42	10
418	0	-9	6	-9	-4	-9	-8	3
420	12	6	11	6	-1	-21	34	-19
421	-2	0	-2	0	0	0	6	19
422	0	-48	0	-24	0	-9	-54	31
423	-3	8	-13	11	-3	-15	11	0
424	18	-5	22	-2	2	-1	-3	-2
425	4	-2	14	-94	4	-94	-2	7
426	0	0	0	-1	0	0	12	-13
427	0	14	0	14	0	9	20	0
429	30	18	36	18	5	-14	6	36
432	3	-3	0	1	-1	-1	-5	-3
433	11	3	0	1	3	1	6	-2
436	-2	2	-2	7	1	-23	2	22
437	-14	-5	0	-6	2	-8	-13	8
438	11	-3	6	0	4	4	25	13
439	0	-6	0	-5	7	0	-2	12
441	9	3	9	3	0	0	12	6
442	-8	-5	-1	-7	-9	-14	-5	-17
443	0	-11	0	-12	0	-5	13	2
444	1	-3	1	-3	1	-3	-3	-1
445	0	-8	0	-8	0	0	-27	-4
446	12	12	22	9	20	9	12	50
447	1	-4	4	-4	-3	-8	-1	-3
448	21	-10	26	8	26	-1	-3	20
449	1	-11	1	0	0	0	-9	2
450	9	-19	15	-10	-1	6	-6	9
451	0	3	2	-3	-3	1	21	15
452	0	0	4	0	0	-12	5	15
453	6	-4	11	5	2	5	7	-18
454	1	-5	-6	0	1	0	10	-11
455	6	-13	11	-13	7	-10	-1	-2
456	0	-6	0	-5	5	-1	6	21
457	0	-3	-1	-3	-1	-6	-1	7
458	4	-4	4	-4	4	-4	6	7
459	12	-4	1	-2	-1	0	-4	68
460	-29	-17	-7	-62	-6	-4	3	61
461	-42	-41	-35	-10	-36	-31	-5	0
463	-3	-3	-4	0	-3	0	-3	-17
464	-1	-30	11	-20	1	-25	-51	-29
465	-13	12	-15	17	0	2	15	-27
466	2	-11	26	1	-15	-27	13	-53
467	-7	6	-9	11	-2	6	23	-8
469	0	0	0	-4	0	0	22	-11
470	0	0	-6	0	-2	-10	14	-26
471	-3	-26	7	-1	0	-26	-16	-32
472	9	6	9	6	5	9	7	1
473	-113	-109	31	7	-98	9	0	-110
475	7	10	7	13	4	8	14	-5
476	-3	5	0	5	0	0	4	-14
479	6	-9	6	-4	6	0	-4	6
480	6	-9	6	-4	6	0	-4	6
481	9	19	1	19	0	9	18	83
482	-2	4	0	6	-2	4	-4	24
483	-9	9	98	9	5	-8	11	-15
485	4	1	2	-4	0	0	7	17
486	0	-20	0	-25	0	-12	5	0
487	7	-4	3	-2	4	-1	3	9
488	0	-3	0	1	0	0	-17	3
490	39	12	65	42	-12	-1	-32	29
491	0	-10	4	-10	0	-5	-11	0
492	12	0	8	-3	-11	-6	12	-14
494	-4	4	-3	4	0	0	5	-2
495	1	3	6	10	-1	-1	10	-21
496	-4	-7	3	-9	0	-19	-5	-12
497	7	5	7	0	2	0	2	5
498	1	-2	6	-2	2	4	-7	4
499	4	2	8	6	4	0	27	-2
500	-3	-3	-2	1	0	-7	7	-2
501	-1	9	-1	9	4	-27	-40	1
502	21	4	8	-1	-8	14	2	-22
504	-36	-46	15	7	-13	-17	-56	-16
505	-11	-4	-5	-7	0	-9	-4	-11
506	-6	-1	14	-12	-5	0	3	14
507	-3	7	-2	5	-2	9	8	-5
508	8	0	45	6	11	10	8	36
509	-4	-1	-2	-3	0	-3	-8	35
510	6	13	-1	13	6	11	14	-11
511	11	11	3	6	3	3	5	-5
512	5	-7	22	-7	6	-8	-6	20
514	0	3	0	3	8	8	0	-2
515	8	-2	8	-2	6	-2	2	8
516	66	0	44	0	10	38	4	-6
517	2	4	10	4	1	1	19	0
519	-2	-7	14	-11	7	-11	-3	38
520	6	-40	6	-40	-3	-37	-33	12
521	0	6	0	7	-4	2	2	0
523	-1	-9	-1	-5	-1	-9	-19	-10
524	0	1	0	-2	0	-4	4	0
525	-19	-5	-17	-2	-1	-10	0	-3
526	-5	-22	2	-18	-8	-10	-22	-1
527	51	-22	30	-12	0	-5	-4	-27
528	5	0	2	0	2	0	7	-21
529	22	0	24	40	13	0	21	132
530	6	-10	12	-11	0	-7	-8	23
531	3	1	-6	3	0	0	7	-18
532	1	-14	1	-14	5	-14	-8	8
534	0	0	0	0	1	0	0	8
536	0	6	0	12	0	0	9	0
537	-2	-5	-3	-5	2	-5	-4	-8
539	0	11	48	-2	3	5	38	10
540	-2	-6	9	-6	3	-6	0	0
541	16	-15	23	-19	20	-9	-5	15
542	21	-1	26	12	5	-1	13	13
543	5	-11	1	-29	0	-20	-6	-3
544	0	-14	0	-15	0	-4	-10	0
545	-22	-18	-3	-13	14	-17	-6	11
546	-4	0	-1	-3	-5	-8	-4	-1
547	18	-10	19	-6	19	-10	-12	37
548	-4	4	0	0	-6	0	1	-19
549	62	-27	-30	94	-12	54	27	64
550	15	11	12	7	15	-1	11	21
551	6	-13	17	-26	6	-11	0	22
552	12	-12	9	-7	5	6	-8	4
553	24	5	27	2	24	1	11	21
554	32	9	47	35	11	18	-24	17
555	0	4	1	1	7	0	10	-1
556	3	-8	17	-8	-8	-7	-4	-24
557	4	-10	13	1	-1	4	-6	-1
558	2	1	2	1	7	1	10	-2
560	-5	-131	0	0	0	0	5	0
561	57	0	57	37	-6	1	-24	-24
563	0	0	5	0	-1	0	0	9
564	3	0	4	0	4	0	4	13
565	10	-14	10	3	13	-9	6	6
566	8	-5	8	-5	5	-5	-5	3
567	-18	-20	52	-16	0	-20	-8	-20
570	-13	-9	-8	-15	0	-9	-7	1
571	-184	-3	0	-3	-3	0	7	-184
573	0	4	0	5	0	-3	1	-6
576	2	-11	2	-9	2	-10	0	-9
578	-7	-13	6	-9	0	-11	18	-19
579	0	4	4	2	4	-39	-24	2
581	-4	9	-4	5	1	6	12	-18
583	-12	0	-2	-8	-7	-23	-15	37
585	8	-3	8	-2	6	0	6	29
588	0	0	22	0	14	0	22	41
589	0	-4	7	-2	6	0	-1	18
590	52	-25	15	-22	-23	-24	-23	11
592	1	-22	11	-29	13	-14	-11	10
593	0	2	1	2	0	2	1	-3
594	4	5	4	12	4	0	12	4
595	37	-3	41	-4	35	-5	2	40
596	-12	-104	38	6	41	-94	22	47
600	-7	6	1	-8	-2	-5	1	-5
602	0	0	15	8	0	-9	9	-17
603	0	-3	-4	-3	1	-8	7	-18
604	4	-12	-16	-9	-1	-12	-10	-17
605	-9	7	-9	9	3	11	1	-5
606	26	11	2	-8	5	-8	11	20
609	11	-13	23	-2	0	0	-8	-1
612	14	-7	17	-7	17	24	109	11
613	-21	-2	0	-11	0	-20	7	-19
616	0	1	14	0	0	5	7	3
617	11	12	-1	7	-1	7	8	-1
618	-7	4	8	5	3	-7	-7	-6
620	19	1	13	0	-1	-1	12	-15
621	60	-3	-1	-12	0	-10	-12	-1
622	0	-34	0	-30	-3	-34	-34	-2
623	24	5	36	5	27	5	24	39
624	8	-23	38	-21	4	-17	-23	17
625	0	-4	0	0	0	-4	0	0
626	24	4	21	8	8	4	7	0
627	47	3	55	0	49	3	27	66
631	-40	0	-12	-6	-5	-18	0	-34
633	57	6	31	6	25	65	6	57
634	21	-6	16	7	0	21	3	-6
638	9	-7	9	4	4	-11	-7	41
639	0	-13	3	4	0	0	7	3
644	-18	-6	4	-6	-18	-8	3	10
645	5	-1	7	2	-2	-1	4	-5
647	2	-39	5	-28	2	-32	-41	2
648	-88	-43	6	-46	0	-33	-33	-86
649	0	-3	5	-7	5	0	3	-11
650	0	-8	2	-8	0	-8	1	15
651	-3	5	6	8	-3	5	12	4
652	6	18	27	25	0	13	25	-16
653	-1	2	7	2	-1	0	5	-1
654	10	-5	12	-4	10	-2	30	22
655	4	0	6	-1	-1	0	11	30
656	10	12	0	0	0	11	13	38
657	8	-7	-9	-1	-1	-2	0	-14
658	-8	13	-6	0	-1	7	-3	-3
660	10	-15	13	-43	4	2	-33	4
661	23	-3	69	-3	1	-3	1	0
662	1	0	1	0	0	0	2	-5
663	0	6	0	8	-3	0	8	-11
664	20	-1	74	6	29	0	0	86
665	-1	-20	28	-22	-4	1	-15	29
666	0	9	-3	4	-1	-6	17	-6
668	29	0	3	-9	-3	0	26	-40
669	-7	4	15	-25	25	9	24	-28
670	3	-10	19	-10	-3	-6	-8	12
671	-4	-8	150	-40	19	-24	-4	185
672	22	-30	22	-23	10	-22	-15	-3
673	15	-19	15	-19	0	4	11	76
674	2	-21	2	-21	2	-18	-25	-13
676	-7	-3	4	-3	-3	0	-4	4
678	-6	-2	-1	-2	7	-2	-2	-11
679	0	-3	9	-3	5	-3	6	5
680	13	-2	13	-1	13	-1	-1	27
681	0	-9	0	-9	5	-9	0	16
682	0	-15	2	-15	0	-13	-1	67
686	7	-14	19	-14	11	-14	-11	11
687	15	23	24	23	15	1	23	27
688	8	-18	13	-14	6	-5	-9	16
689	-2	-1	-2	-2	-2	-6	-4	-2
690	2	-7	-3	-11	-6	-14	5	-6
691	-2	3	8	1	8	6	5	-71
692	0	-1	-4	-1	-4	-9	-1	-20
695	4	-2	5	-2	-5	-2	4	-10
697	0	-8	-6	-10	-1	-12	-14	1
698	2	2	1	2	-11	-12	-15	2
699	3	3	13	3	6	-3	4	-2
701	13	-11	13	-7	4	0	0	4
702	1	-15	1	-15	-9	-4	-5	169
704	0	-10	4	-4	0	-8	13	4
705	2	-8	5	-6	-4	-10	-5	-12
706	0	-10	6	-2	9	-10	-4	17
708	76	-47	5	12	-77	-71	-40	115
710	7	-9	11	-9	9	-8	-14	1
711	1	-2	3	1	-4	-3	-4	6
712	-93	11	6	-82	-91	-95	41	61
713	6	-11	8	-6	2	-4	-10	11
714	23	-16	7	-25	1	-16	-8	21
715	-15	19	20	12	20	26	5	42
716	-55	-83	11	-84	-14	-84	-74	-89
717	-5	8	13	8	0	2	23	12
718	-4	11	-4	22	-1	11	22	-19
719	26	-6	42	1	0	-6	6	70
720	-108	-25	-72	-25	-77	-115	-25	-67
722	0	-11	24	2	0	-1	-3	-3
723	-2	-6	3	3	0	-3	-16	-13
724	0	-8	0	-14	0	-16	-3	4
725	-1	-15	-8	-3	0	-19	6	6
726	0	-3	7	-3	21	-2	-1	17
727	0	2	0	2	0	-6	3	-1
728	9	-15	9	-21	9	-21	-5	15
730	3	-10	6	-10	3	-10	-10	6
731	0	-4	21	-2	4	6	-27	0
732	0	-8	-13	5	0	0	-4	-2
733	0	9	2	8	0	5	9	-9
734	60	-1	51	-1	1	0	-12	51
735	-6	-11	-6	-11	0	-11	-3	-6
736	0	0	0	0	0	0	15	2
737	1	-7	-10	-7	2	-18	-5	-14
739	6	-8	9	14	9	-2	-3	-4
741	13	-32	13	-33	-7	-20	-21	-1
742	0	1	0	1	-6	0	6	-12
743	0	-3	-21	-10	0	-3	-3	-53
744	4	-41	4	-43	-6	21	-13	107
750	-3	9	1	5	-4	-3	2	-26
751	-6	-12	18	-13	3	-18	0	5
752	6	-6	-2	1	-2	12	-5	-2
753	-5	-30	2	-30	-37	-32	5	-11
756	21	-12	11	5	16	5	-9	34
757	0	0	7	8	6	9	-19	-1
758	5	11	0	11	0	11	11	-8
759	0	11	-19	11	0	10	12	-16
760	-1	13	8	10	6	5	31	11
761	-3	1	-3	1	1	1	3	53
762	-6	-9	0	-9	0	-8	-8	-9
764	7	3	7	3	7	2	3	3
765	-2	-4	7	-7	-9	-2	-5	32
766	5	14	10	11	11	5	7	106
767	0	-7	3	-2	3	-13	0	-15
768	0	5	0	0	0	0	5	-8
769	0	3	0	1	0	1	-4	0
770	17	4	18	4	1	1	1	25
772	-3	-2	-3	-9	-3	-5	0	-6
773	16	13	65	-3	16	-3	19	59
774	41	4	56	36	22	11	-15	56
776	-22	-4	-16	-6	0	-6	1	8
777	18	0	9	-8	1	-15	18	1
779	0	-5	3	10	0	-2	14	53
780	-31	61	31	47	28	45	-9	-31
782	0	-8	0	0	-3	-5	3	-12
786	-3	-20	-5	-20	-2	-15	-9	-59
787	0	-1	0	6	-7	12	30	37
788	-5	-32	9	-32	0	-28	-17	9
789	10	-6	43	-3	0	-3	35	12
790	-3	-16	9	-9	6	2	-16	9
791	7	12	1	-5	0	-5	12	4
792	46	-3	23	16	18	-6	-43	25
794	-14	-30	2	-26	-6	-35	-25	-5
796	-4	7	-7	3	-4	1	0	-9
798	0	-28	4	-28	0	0	-28	4
799	8	-20	1	-14	-2	-9	-10	-8
800	-6	0	-2	3	-6	0	-3	1
801	3	-13	3	-10	-9	-13	-4	4
802	0	-2	3	-2	0	-2	-5	3
803	0	-6	1	-10	0	-9	-6	-3
804	15	-7	15	0	0	0	-10	15
807	-2	5	-2	-5	3	0	5	9
808	2	5	5	5	0	0	9	-6
809	1	-5	1	-5	1	-7	-1	-11
810	-16	-2	-7	0	0	-4	-12	-17
811	-3	-3	9	-3	0	-4	-3	-13
813	122	128	-3	-44	117	129	151	151
814	-5	-3	0	-3	-8	0	1	-8
815	-3	12	18	4	3	4	16	6
816	7	6	11	16	8	3	24	5
817	0	8	0	7	0	-3	5	0
818	1	4	-2	1	-1	5	5	-2
819	12	-2	38	7	15	1	4	36
820	10	4	37	5	0	2	13	7
821	16	0	-18	21	-2	21	-11	51
822	27	-10	87	-9	-5	-9	-7	76
823	0	-3	3	-6	0	-5	-3	6
824	0	4	3	4	3	-2	-2	5
825	-4	7	-1	5	-2	8	-6	5
826	7	0	7	-2	9	-2	-1	2
827	4	10	14	1	-7	16	6	3
828	0	-7	0	-7	0	-7	-10	-2
829	-1	5	40	5	-1	5	8	0
830	1	-13	5	-3	0	-3	-6	-6
831	-43	-8	-43	-14	5	-40	45	75
832	0	-10	0	-2	-4	-17	-6	-4
833	8	-3	14	-3	8	13	-8	23
834	0	5	0	-2	0	0	12	-18
836	2	-1	4	-1	7	-1	-5	30
838	1	-4	1	-5	0	0	-5	3
839	0	-7	-5	-3	-7	-11	10	-7
840	24	-10	30	-17	24	-3	-2	30
841	-4	0	46	-1	-4	-3	37	37
842	4	5	18	15	19	2	17	26
843	4	8	8	8	8	-6	8	-6
844	0	-7	0	0	0	0	-7	3
845	-16	9	-15	-5	-7	-5	10	-20
849	3	1	2	1	-5	1	-5	-1
850	0	6	0	6	0	10	12	0
851	7	-3	12	-4	1	-10	-10	13
852	-2	-4	-6	-4	-7	0	-3	-4
853	0	0	9	-4	0	4	-7	1
854	0	2	11	-5	0	0	9	-6
856	-4	11	0	0	-7	0	6	4
857	0	-14	0	-9	0	-9	-12	-5
858	6	22	33	7	9	9	33	13
860	16	-20	11	-20	17	3	-15	20
861	7	7	-3	7	-3	-11	7	4
863	0	-9	0	-8	0	0	-5	-5
868	-191	-3	-167	-2	-18	-10	-56	13
869	0	-8	0	-3	0	-2	-9	-12
870	0	-4	2	-4	0	-4	-10	-6
871	2	5	-6	6	6	-47	9	-58
872	0	11	0	1	0	11	11	11
873	2	6	4	6	4	0	14	-9
874	8	1	12	1	15	21	1	15
875	5	-13	5	-8	8	-16	-5	-3
877	0	11	0	11	-7	-1	9	35
878	4	-4	11	-4	0	0	15	-12
880	0	-1	0	-2	0	-1	-1	0
882	0	5	0	0	0	0	6	-4
883	1	-10	19	-9	-2	16	2	16
884	2	-15	2	15	6	-4	-10	-16
886	0	-10	8	0	1	0	-1	8
887	-2	1	0	4	-2	4	1	-27
888	0	35	3	24	3	-3	35	-4
889	2	-1	5	2	0	-6	3	41
890	0	-14	0	-15	0	-9	-1	0
891	1	-5	6	-1	1	-1	2	5
892	5	6	1	8	0	0	8	-8
893	4	8	14	5	0	-4	14	0
894	-6	-14	10	-1	-7	-15	-10	0
895	7	2	12	2	7	-2	8	7
896	-15	3	2	0	5	-5	19	-3
897	0	-3	-3	-7	0	-8	3	-45
898	5	7	10	-7	-1	-5	16	26
899	16	11	10	13	1	11	16	-1
900	74	-2	79	0	4	0	63	8
901	0	0	7	2	-3	0	5	-2
902	5	-7	6	-3	5	-7	-6	13
903	-6	-15	-6	-15	-5	-14	-14	-11
904	3	2	12	2	0	1	27	0
906	89	-7	61	0	5	0	5	70
907	2	7	0	2	-7	-16	22	15
908	4	-22	4	-22	4	-15	-18	4
909	-1	-1	-1	40	-1	-1	2	-1
910	-7	-9	13	-9	0	-7	6	10
912	0	-2	2	-2	2	6	10	0
913	4	2	3	2	-3	3	9	-3
915	9	3	9	4	0	6	6	-3
917	1	-9	9	-10	1	-2	-9	26
918	-4	-1	-2	-1	-1	-10	-1	-20
920	0	-21	7	-23	2	-18	-13	6
921	41	-3	41	-1	27	3	-3	34
922	0	-5	0	-5	0	-3	-3	0
924	1	0	6	4	6	-4	7	-30
925	0	-12	4	-12	-4	1	-12	0
926	8	3	8	8	0	3	19	-5
927	-4	-4	0	-6	0	1	-1	-15
928	0	-6	0	-13	0	2	-2	13
930	-2	7	-2	8	0	8	13	-2
932	-16	8	-34	-1	15	15	-31	4
933	0	-8	0	-4	0	-6	-8	6
934	2	-11	2	-12	2	-5	-5	74
935	-1	-15	10	-11	2	-10	-2	-5
936	-24	-34	11	-125	-23	-97	48	65
937	-3	-33	-12	-15	-4	-27	-21	5
939	6	3	6	-2	0	3	-12	-18
940	-4	-3	-1	-3	-1	3	-3	-7
941	0	-4	0	0	0	-4	2	-7
942	-4	2	-4	2	-4	2	2	-3
944	-43	4	6	19	-4	-21	1	20
945	4	5	4	9	7	-1	17	29
946	-6	-4	2	0	2	0	3	14
948	-3	1	9	3	-3	5	2	-5
949	5	-4	5	0	1	0	-3	-6
950	5	-1	5	-4	0	8	-2	0
951	10	7	-3	16	-3	0	13	-4
953	-8	-3	0	1	8	-3	4	21
954	-21	3	-1	0	1	-6	21	-38
955	-6	-5	27	-6	9	-5	-7	35
957	4	2	16	2	4	-4	26	-2
958	46	1	62	0	-12	0	58	47
959	-16	-9	-5	-10	-7	-9	-17	-7
960	172	-7	171	-2	-5	-2	6	-1
963	2	4	-6	-27	0	-3	8	-22
964	-2	-3	-8	-5	-8	-3	10	-12
968	-36	-53	4	-7	4	-53	-8	7
969	4	2	4	4	-4	7	11	-15
970	8	7	47	7	-1	5	8	-7
971	-4	-3	0	-4	-4	-10	11	-13
973	0	7	0	-1	0	-18	-4	-12
976	1	0	1	1	2	3	6	4
977	4	0	-6	-18	0	-18	56	63
978	0	-11	12	5	0	0	-12	12
982	-7	8	-7	8	5	0	14	-7
983	-8	4	152	1	14	38	34	7
984	12	11	17	0	10	11	0	42
985	-28	-2	0	-9	0	9	0	-28
987	32	-3	26	-17	2	-4	4	39
990	3	-4	14	-4	1	11	-8	1
992	-2	-2	-2	1	-2	-2	-2	-9
993	6	5	24	29	5	4	14	4
994	0	17	-4	18	-2	0	29	-7
995	-8	-8	10	-16	-8	-16	-5	154
996	0	-2	8	4	8	-3	5	18
997	8	-1	12	1	7	1	4	16
998	0	1	100	0	0	-1	71	-10
999	40	64	43	29	-8	60	129	-9
1000	8	1	8	0	8	0	8	8
1001	0	-38	9	-32	9	-38	-30	10
1002	-18	-3	-3	-15	-11	-26	-12	3
1004	-28	-37	15	-33	-9	-26	-2	-13
1008	9	18	11	17	8	-1	3	9
1009	0	-17	0	-44	0	-12	-2	-26
1010	6	-2	6	2	-3	-3	10	12
1011	9	-9	10	-9	10	-9	-9	4
1012	6	26	7	4	-3	16	29	9
1013	1	-6	2	-6	0	-5	4	4
1014	25	19	29	2	32	-1	23	-1
1015	12	5	4	4	-3	12	12	15
1016	31	4	31	4	28	5	22	29
1018	1	-27	5	-20	0	-15	-15	3
1019	2	-9	18	-8	2	-1	7	-8
1020	3	3	3	3	1	-4	4	-24
1021	0	-6	1	-3	0	0	-6	2
1022	-4	13	-4	-6	0	-5	-2	-5
1023	2	9	0	-8	2	1	11	0
1025	20	-7	-4	-2	-5	-4	1	-12
1026	5	3	5	-3	0	0	13	3
1027	-1	7	-2	1	-1	2	7	-5
1028	6	-23	0	-28	-16	-29	-27	-30
1029	0	-32	2	-30	-5	-9	-13	13
1030	13	15	9	12	-27	11	-19	-33
1032	36	-3	32	1	28	1	13	23
1033	8	-7	3	2	2	-3	-3	-9
1034	5	-14	4	-14	-2	4	-7	-4
1036	-4	2	-2	23	-3	-2	0	30
1037	0	-11	0	-11	0	-1	-11	0
1038	0	0	0	0	0	0	4	0
1039	10	-4	4	-4	0	0	13	0
1041	2	-4	-2	0	-2	4	-1	-6
1042	0	4	0	-1	0	0	9	-1
1044	-5	-12	4	-14	-7	-12	-8	12
1045	10	-19	0	-20	0	-4	-3	21
1047	-1	-42	12	-11	2	-24	-2	-4
1048	10	-28	15	-15	10	-15	-24	8
1049	-1	16	30	16	15	-4	16	19
1050	-8	0	-8	-10	-14	-9	7	-9
1051	5	3	6	14	0	1	14	0
1052	-6	-6	-6	-2	-6	-2	-6	2
1055	-8	-12	-4	-19	0	-9	-1	-10
1056	0	6	0	1	0	3	9	0
1057	-4	-12	-2	-11	0	-19	-10	-1
1059	-4	2	0	-1	-4	-4	4	-12
1060	2	11	109	9	2	2	17	8
1061	1	-1	-6	2	-8	2	2	-6
1062	-4	4	8	-2	3	6	-2	26
1063	0	-3	2	-4	1	0	-1	-1
1065	0	-7	6	-10	1	-3	-1	28
1066	0	-9	1	-18	0	-9	-12	3
1067	3	-16	25	-9	3	-6	-11	11
1068	14	-2	14	-2	0	0	7	17
1070	0	2	0	14	0	0	9	-2
1071	1	6	8	6	1	0	6	5
1072	-6	0	-6	0	0	1	17	-7
1073	0	-6	0	-8	-2	-3	20	6
1074	0	0	1	0	0	0	11	0
1076	31	7	24	27	6	8	11	11
1077	-8	-3	6	-5	1	-5	-3	6
1078	-8	-9	-3	-9	-3	-6	-3	-24
1080	4	3	4	7	4	0	34	-1
1081	4	-10	8	-10	1	-9	-6	17
1082	0	4	-5	2	-5	2	4	-5
1087	-18	8	14	-36	-11	-29	-35	-82
1088	49	4	145	13	-12	14	114	120
1089	0	-5	1	-5	0	0	7	-3
1091	6	-3	11	-13	-1	0	1	-7
1092	16	10	14	8	8	8	10	10
1093	-4	-10	21	-12	0	-4	12	3
1094	4	0	4	0	4	0	0	0
1095	0	-1	0	3	0	2	2	-14
1096	2	-34	6	-35	2	-9	-37	-11
1098	7	-9	10	-9	5	-9	2	6
1101	23	0	40	9	20	4	4	-10
1104	54	56	76	2	10	-27	2	181
1106	-6	0	3	-1	-1	-5	0	64
1107	0	-14	0	-11	0	-9	-13	-9
1110	3	4	4	0	3	0	6	8
1113	14	4	14	0	6	6	3	-16
1114	0	-4	6	1	3	1	-4	-2
1115	3	3	0	7	3	12	4	-5
1116	0	2	45	2	1	1	11	25
1117	23	82	3	75	0	75	58	-36
1118	4	6	2	10	1	3	14	-4
1119	8	-7	8	-7	0	-1	-7	0
1121	0	-9	3	-10	2	-7	2	30
1122	-7	-8	3	-12	-7	2	17	38
1123	0	15	3	9	0	9	21	-4
1124	18	-1	14	-7	10	-11	25	34
1126	14	6	15	14	-4	14	16	-8
1127	38	-14	63	-14	19	-14	-14	67
1129	4	-1	15	-5	1	-1	3	-9
1130	0	17	5	17	0	0	17	0
1131	14	-68	5	-3	8	-60	-59	-8
1132	42	0	42	0	2	4	22	33
1133	21	-9	-2	-11	-8	-2	8	-5
1134	0	0	0	0	0	0	-8	-13
1136	28	-17	25	-17	25	0	-7	25
1137	1	-39	6	-36	0	-36	-35	-14
1138	8	-1	13	4	5	0	31	11
1139	23	-39	23	-23	10	-18	-38	23
1140	-2	-11	-1	-6	-2	-10	12	-2
1141	1	-4	-5	-6	-6	4	6	-10
1142	6	-12	6	-21	6	-12	-12	11
1143	0	9	0	9	0	5	6	7
1145	-19	5	-11	8	3	-3	16	-22
1146	0	-6	-7	-3	-2	-10	-1	-14
1148	-6	-10	0	-10	0	-10	6	22
1149	-7	23	-11	-8	0	-13	26	-3
1150	0	-7	0	0	0	0	-7	-39
1151	5	-11	10	-3	3	-11	-9	4
1152	4	-10	20	-10	-2	-5	-32	-2
1153	-6	-18	119	-30	-6	-19	-5	75
1154	6	-4	2	-4	8	-11	-2	-19
1156	0	6	0	8	0	6	10	-13
1157	-15	-17	0	-17	0	-25	-1	0
1158	-11	24	-5	21	9	-7	26	-11
1159	-89	-44	-65	-65	8	-65	-20	39
1161	-10	-1	-2	-24	0	-2	-5	11
1162	9	12	16	12	4	6	12	-1
1163	8	-3	19	8	8	10	13	11
1165	-6	-4	-8	3	-3	-9	-5	-16
1166	8	6	1	6	0	6	12	-16
1167	-1	5	29	5	14	4	-3	-7
1168	-4	-5	-4	-68	-3	2	-104	-9
1169	-2	-16	6	-10	-9	-24	5	3
1170	-24	61	-154	-169	-12	-158	-167	71
1172	0	3	-3	-1	0	0	18	-3
1174	0	1	0	0	0	-2	0	0
1175	5	9	9	9	5	0	-3	-14
1176	2	-11	3	-11	0	-8	-7	6
1177	0	-16	0	-12	0	-15	-30	2
1178	-2	-5	33	-2	5	-2	-3	-4
1179	7	-8	7	-30	3	-30	-8	3
1180	3	-6	6	-8	-15	-8	25	25
1181	4	3	-1	9	4	5	11	16
1182	31	-10	16	-7	0	-5	7	-6
1183	1	-20	2	-26	2	-18	-20	2
1184	-11	-6	4	-7	-9	-7	-1	5
1185	-23	9	-18	-36	22	-23	29	-25
1186	4	-6	3	-8	-9	-1	5	-14
1187	-9	23	0	20	28	-5	65	-52
1188	30	7	44	-11	11	-11	15	10
1189	-7	-1	39	37	6	38	24	-70
1190	-64	-115	-61	-82	-81	-64	-111	-121
1191	12	63	63	7	-47	-60	-41	-57
1192	3	1	25	1	-4	1	1	18
1193	9	-6	9	-6	9	-3	-3	0
1194	1	-2	1	-1	-1	1	5	51
1195	9	-51	9	-51	3	-51	-42	7
1196	0	3	0	1	0	3	3	9
1197	3	-10	3	-9	3	-9	2	6
1198	0	4	0	8	0	4	8	0
1200	7	42	-9	34	29	43	12	-23
1201	0	-11	-4	-6	0	-6	-7	-4
1202	0	3	11	-2	-3	0	4	10
1203	0	0	1	0	0	0	21	-11
1204	2	-6	106	0	0	-6	-4	-11
1205	-5	4	-1	4	-5	4	10	-2
1206	0	5	0	8	0	-3	8	0
1207	7	1	-2	3	0	10	11	7
1208	0	0	0	0	0	0	8	0
1209	-6	9	-4	24	5	-6	-2	24
1210	0	1	1	1	11	1	1	19
1211	-5	-2	-2	-6	-1	-2	18	11
1213	0	-15	0	-6	0	-8	-15	-3
1214	-15	-23	-5	-23	-5	-30	-21	-18
1215	-6	1	-2	4	-2	-9	5	-22
1216	0	-3	0	-3	0	0	4	30
1217	-3	11	-3	7	-13	10	12	-122
1220	2	0	2	0	2	-2	0	1
1222	-40	4	-9	-22	5	-22	-17	-1
1223	2	27	22	12	5	3	19	0
1224	0	-4	0	-2	0	-1	-5	-9
1226	7	3	9	-3	0	-1	6	-6
1227	-2	8	0	0	2	-19	5	-9
1230	7	-7	-1	-5	-5	-11	1	7
1231	-4	7	33	-10	6	-9	16	-7
1232	4	7	2	5	2	5	7	2
1233	0	-12	0	0	0	0	-15	0
1234	-16	-16	16	-16	0	-16	-16	3
1235	-9	-11	8	-3	-2	8	15	-17
1236	2	-19	2	-15	2	-15	-20	-1
1237	24	0	16	0	5	0	5	20
1238	0	-8	0	-8	0	-8	-3	5
1239	0	-3	0	-6	0	0	-11	-8
1240	0	-9	-5	-1	-6	-11	-11	35
1241	3	-12	23	-12	-1	-14	-5	-2
1244	-5	23	-1	23	-3	-5	23	9
1245	-1	-14	-1	-10	-7	-13	-8	-1
1247	4	-7	5	-16	0	0	1	25
1248	20	-16	20	-16	15	15	2	29
1249	-47	-42	43	-42	36	-47	-47	-41
1250	0	2	1	2	-1	0	2	-10
1251	8	2	-2	-11	-2	12	12	-2
1252	33	2	26	9	4	9	10	30
1253	0	-1	4	-6	4	-1	-4	18
1254	9	-24	10	-24	6	-26	-13	14
1255	0	1	4	0	0	1	17	-5
1256	1	2	6	1	1	2	19	-6
1257	47	-25	79	-25	0	-25	-5	50
1259	0	-6	4	-7	3	-7	4	11
1260	0	5	-3	5	1	2	5	5
1261	0	-9	11	-9	0	-5	-1	0
1262	7	-1	31	-7	14	-1	-4	18
1263	-5	-7	0	-40	0	-8	7	-9
1264	2	8	2	7	1	-1	10	-5
1265	16	-13	32	-5	-3	-9	-8	11
1266	1	-6	1	-2	1	2	5	1
1267	9	-7	16	-7	22	-10	-3	14
1268	15	-5	15	-4	0	-2	5	17
1269	5	-16	11	-12	3	0	1	-1
1270	14	-2	14	0	14	-4	-10	9
1271	5	0	5	-3	4	0	12	-2
1273	0	26	32	40	4	-7	46	-68
1274	2	-15	8	-14	4	-15	-15	-13
1276	-39	-1	-12	12	-1	-23	-11	12
1277	-135	-9	33	-9	4	-4	-9	0
1278	3	-1	5	-1	3	-1	8	134
1279	3	3	3	6	3	0	15	-10
1280	123	113	-56	108	6	-2	116	0
1282	2	-7	2	-11	2	0	-7	6
1283	2	-45	2	-2	3	-8	-32	13
1284	-24	-37	-4	-43	-13	-32	-32	-32
1285	-1	-1	19	1	1	1	-1	17
1286	0	0	-1	-1	12	10	19	21
1287	-8	7	-8	7	-7	7	7	-16
1288	1	1	14	-5	1	2	3	23
1289	8	-5	0	-7	4	-5	-5	7
1290	0	11	0	11	0	2	12	-23
1291	4	-37	13	-35	-25	-30	-18	13
1292	33	-2	60	-2	3	5	17	57
1293	0	-9	0	-25	-2	-37	-14	0
1294	1	-1	5	-2	8	-2	5	16
1295	-2	3	5	-1	-7	1	15	-10
1297	-1	1	4	5	-3	2	5	3
1298	6	0	-2	0	0	-8	0	-88
1300	33	-4	38	35	3	-10	13	-19
1301	9	-26	11	-28	5	-1	12	21
1302	37	0	0	-11	-3	0	0	106
1303	-3	-34	10	-29	8	-7	-30	-1
1304	0	-2	0	0	-1	0	-1	-3
1305	4	3	0	0	2	3	3	-6
1307	0	10	3	5	0	0	10	3
1308	-2	-3	2	0	-1	0	5	16
1309	-5	15	8	0	7	0	22	9
1310	5	5	2	2	0	5	34	32
1311	0	0	0	0	0	0	7	-1
1314	13	53	24	3	89	92	13	89
1315	-4	-10	5	-9	-4	-4	-7	52
1316	4	2	7	5	2	5	5	-4
1317	-2	4	-2	4	0	4	6	-2
1319	14	-65	19	-37	0	-67	6	8
1321	0	-2	0	-2	0	0	2	2
1322	-10	-10	6	-12	12	14	-5	25
1323	-10	10	14	7	-1	-19	25	-97
1324	5	6	5	10	8	5	4	26
1325	-37	-47	-3	3	-2	0	-102	-134
1326	0	-18	7	-11	-6	-1	-8	-16
1329	7	-20	31	-16	7	-20	-11	-7
1330	1	-12	1	2	-4	-2	3	-1
1332	0	-11	0	-8	0	0	5	0
1333	-8	-12	-6	-11	7	0	9	28
1335	11	11	0	15	7	11	-2	-227
1337	0	0	1	0	2	0	0	-1
1339	14	-14	20	-14	10	-2	-4	32
1340	67	-14	62	3	4	-21	-13	46
1341	10	-8	10	-8	6	0	-1	8
1342	14	-36	16	-36	14	-36	-43	2
1343	-16	-16	3	-3	0	-22	24	-28
1344	-25	-27	11	-25	5	-29	-11	-8
1345	5	14	-2	-2	-1	-2	4	-8
1346	26	-8	9	-8	-7	-8	-8	19
1348	0	-7	8	-6	0	0	-10	-1
1349	2	8	2	8	2	8	16	2
1351	0	-22	13	0	0	-47	-30	12
1352	4	-7	4	-6	4	-6	-2	4
1353	30	-7	9	0	0	-5	-14	30
1354	0	-16	3	-13	-3	-15	11	-2
1355	19	-12	27	-8	25	-14	-8	35
1356	7	-7	11	-7	2	-5	-4	10
1357	0	8	31	8	8	8	14	53
1358	8	16	6	7	2	10	7	13
1359	9	-10	16	-11	7	-2	-2	19
1360	-1	-9	-5	-5	-5	-5	2	-9
1361	15	3	17	3	15	3	3	7
1363	-150	-6	-52	-3	-4	-1	-166	-157
1365	-1	-11	-3	0	-3	-11	4	12
1366	4	8	16	4	1	4	25	11
1367	7	3	7	-1	7	2	19	7
1368	-32	-37	5	-37	5	-38	-30	-45
1369	1	-15	5	-10	5	-10	-20	11
1370	3	5	9	5	0	0	7	-4
1372	0	-6	5	-6	0	0	-5	-7
1373	2	-32	0	-32	3	-4	-16	22
1374	0	-2	11	-2	0	-2	0	-10
1375	5	-1	5	3	5	-5	18	-11
1376	0	0	3	0	0	0	5	4
1379	3	10	6	3	0	5	10	19
1380	5	-7	7	17	3	4	0	-8
1381	0	-19	0	-21	-15	-15	0	-28
1382	3	9	6	13	-1	9	8	-7
1384	2	-15	5	-14	5	-14	-8	-8
1385	0	-11	0	-10	0	-9	-6	0
1386	3	3	3	2	-7	3	0	9
1387	8	-4	10	-4	10	0	-5	-24
1388	4	1	4	1	4	1	4	4
1389	-97	-94	-97	71	-97	72	-106	88
1390	12	7	26	-1	1	3	27	1
1391	5	1	5	1	4	1	1	-1
1392	-1	2	-1	4	-1	1	6	-1
1393	53	-3	117	-7	-2	-2	64	114
1394	0	-8	0	-14	0	-4	-4	-1
1395	8	-8	9	-5	0	-5	5	16
1396	-3	2	-6	0	0	0	16	-8
1397	-1	-3	13	-3	13	-3	-1	11
1398	0	2	0	-18	-4	-22	0	-13
1399	35	-4	35	-3	28	-5	1	45
1401	0	17	0	14	0	0	17	-5
1402	0	17	13	13	13	17	13	32
1403	-3	-27	21	-30	-5	-21	-22	-13
1404	5	5	2	10	-1	5	8	26
1405	2	-2	2	0	-3	-1	-1	12
1408	2	0	14	8	-1	2	8	2
1409	6	-9	6	-6	6	-8	5	2
1411	0	1	0	1	0	0	31	-1
1412	-34	7	-49	-33	1	10	-16	0
1413	0	-9	6	-2	6	-3	-2	-12
1414	-17	-35	4	-38	16	-38	-32	44
1415	25	3	25	7	22	0	5	24
1417	-9	-7	1	-8	-2	-2	-13	44
1418	0	-3	17	3	17	0	-3	83
1419	1	-4	11	-4	0	-2	4	11
1420	-15	-6	24	-20	-2	-2	5	117
1421	3	-12	17	-12	7	-11	-4	45
1422	9	2	19	-2	-10	-3	11	24
1423	8	-3	9	-5	5	-3	-3	5
1426	0	-1	3	-4	1	-4	-1	3
1427	12	-16	14	-8	0	-9	6	10
1428	-5	-1	6	-5	2	5	10	3
1429	21	-16	25	5	8	-13	-16	37
1430	0	-2	0	0	0	1	9	3
1431	0	-4	0	-4	2	-4	-4	2
1436	-4	-1	2	-5	3	-8	-1	-19
1437	-10	-6	12	-8	11	-4	10	21
1440	0	-2	-2	-2	0	-4	11	-3
1441	-2	-8	3	-8	-2	-7	2	-19
1444	2	-2	2	2	-1	5	5	1
1445	0	-1	6	-5	0	-5	7	214
1446	4	-2	4	0	2	-2	-1	-9
1447	0	-6	0	-6	0	-6	-9	-10
1448	3	-13	0	-9	3	-9	-11	12
1449	-4	-4	-2	-4	-2	-23	-2	-15
1450	10	23	10	20	5	-3	23	-1
1452	7	-7	0	-14	0	-10	4	0
1453	-2	9	5	5	-6	-3	9	-10
1454	3	-10	7	-10	7	-8	-6	13
1455	0	-5	0	-5	0	-5	-5	-6
1456	51	1	48	3	-2	3	3	49
1457	10	-9	16	-9	7	-9	0	12
1459	-3	-5	2	4	0	1	-2	-8
1460	-15	-7	-20	1	-17	-9	-24	-11
1462	4	0	5	-1	-3	-3	0	1
1463	-16	-13	-9	-16	18	0	-3	-8
1464	1	-12	1	-26	-3	-21	-7	-7
1465	6	-8	0	0	0	0	6	0
1466	5	-4	3	-7	2	-5	6	22
1467	0	0	4	0	4	0	2	15
1468	7	25	8	-8	-3	-8	25	7
1469	-4	0	-1	-4	0	-4	0	5
1471	5	5	10	-4	2	5	1	124
1472	1	-3	0	-2	1	-4	9	6
1473	-3	-3	0	0	0	0	0	-12
1475	16	-48	0	16	0	16	-48	-44
1476	-29	-8	-5	-26	-26	-26	-8	-26
1478	-20	-7	0	-7	0	-11	-1	-6
1479	0	-1	5	-1	3	0	0	-1
1480	-7	16	-1	16	0	10	21	0
1481	0	0	16	-18	0	0	-18	25
1482	0	0	16	-18	0	0	-18	25
1484	0	0	1	0	0	0	4	12
1485	50	-45	26	-49	3	-47	70	-35
1486	-1	-6	-4	0	-3	-2	8	-8
1487	9	5	5	7	0	-3	0	6
1488	6	-208	1	-213	-21	5	-198	-26
1489	52	-13	67	-13	33	-14	-11	63
1490	6	17	6	26	-1	-1	31	-4
1492	77	22	77	5	0	72	3	0
1493	4	-3	0	-4	0	1	-3	-11
1495	16	-90	47	-90	1	-90	-90	183
1496	-11	-16	3	-16	7	2	-63	-3
1499	2	-1	0	0	0	2	2	2
1502	-72	-111	-15	-11	-12	-15	-75	-21
1503	1	-4	4	-4	4	0	5	9
1506	12	15	24	2	0	10	25	1
1508	8	-17	21	0	8	-17	-8	8
1509	66	-17	32	-23	2	-23	0	11
1510	-3	17	-6	5	2	-3	6	-7
1513	4	3	9	0	0	0	26	-2
1515	0	-12	36	-3	6	-14	2	-9
1516	4	4	0	4	-2	0	5	-1
1517	0	0	2	0	2	0	2	-13
1518	25	1	9	35	-8	-11	46	43
1519	0	-11	8	-11	1	-7	-3	4
1520	0	6	0	0	0	18	19	14
1521	-8	-9	2	-37	2	-31	-29	2
1522	10	10	10	-3	2	2	13	5
1523	1	-3	1	3	1	0	4	4
1526	4	-11	18	-17	2	-1	-11	18
1528	0	-12	28	-21	4	-12	33	225
1530	6	-26	19	-26	9	-26	-17	-3
1531	12	3	9	9	4	6	10	-1
1532	-3	-7	4	7	1	2	-2	1
1533	-71	-77	-10	-74	-41	-55	-67	-110
1534	3	-77	11	-41	20	-32	-73	27
1535	9	-7	15	-6	3	-6	-4	5
1536	26	0	30	3	1	-6	3	-13
1537	-5	3	-5	11	-5	0	8	-19
1538	0	-13	3	-10	3	-8	-9	14
1539	-6	-13	-6	-10	-6	-14	-12	16
1541	-4	-13	14	-4	-2	-4	-14	-10
1542	1	-4	3	-41	-3	2	-29	2
1543	1	0	2	0	1	1	5	-23
1544	0	3	2	6	1	0	6	-11
1545	3	-5	2	-5	1	-5	-4	-5
1546	11	-15	15	-20	0	-1	-15	18
1547	3	-4	1	-4	-3	-4	-6	6
1548	-16	0	92	28	4	-4	17	-28
1549	9	-9	9	-9	9	-5	-7	18
1550	-3	-10	-3	-10	-3	0	-7	-16
1551	1	59	1	56	5	0	81	-8
1552	-88	-5	0	2	-1	-109	-84	-132
1553	5	-1	5	4	0	-6	11	4
1554	-1	-36	8	0	-3	0	-42	0
1556	137	0	5	0	5	0	7	0
1557	5	-21	19	-32	0	-13	-7	5
1558	7	-8	5	-6	-2	-6	-8	0
1559	8	-34	8	-34	8	-14	-20	6
1561	5	0	9	0	8	0	1	0
1562	27	-4	-61	-1	-61	-1	-25	11
1564	-11	0	7	-19	-1	-13	-5	11
1566	0	-59	9	-60	0	-51	-56	-18
1567	-2	-41	16	-42	0	-14	-32	17
1568	5	2	28	4	4	-2	4	0
1569	28	15	-2	15	10	10	10	-28
1571	7	9	-1	12	0	0	29	29
1572	-27	-75	39	-97	-65	-83	-58	-72
1574	0	2	0	0	0	0	-7	0
1575	2	10	8	10	0	7	10	-8
1578	-3	0	-3	1	-3	-1	4	-3
1579	-27	-8	-18	-22	2	0	-15	-4
1580	1	13	0	3	2	6	28	-6
1581	5	1	17	-17	2	-3	11	11
1582	18	-5	9	-3	8	6	2	0
1583	0	7	-1	3	-1	3	13	0
1584	-3	5	-2	5	-5	13	5	-21
1585	-7	-3	2	-3	0	-7	5	-5
1586	1	-7	2	-3	6	0	14	16
1587	2	-19	21	-15	2	-15	-7	1
1588	11	-14	11	-14	2	-9	-13	2
1589	14	-9	14	-4	14	-8	-4	14
1590	3	0	0	0	-1	0	1	-4
1591	8	6	9	6	5	8	6	-3
1592	2	-8	-5	-1	0	-13	-12	-5
1593	-4	4	-1	2	2	2	8	-14
1594	27	5	3	0	12	3	48	234
1595	6	-3	17	3	1	3	5	-2
1596	0	-14	7	-14	0	-1	-1	-6
1598	0	-8	0	-5	10	-5	8	-1
1599	-7	11	2	11	-2	13	11	-14
1600	4	4	6	9	6	-3	12	3
1601	1	4	6	8	0	0	7	16
1603	1	11	1	11	0	0	11	34
1605	27	-11	2	6	1	6	22	-4
1606	25	-9	25	-7	17	-9	-4	21
1610	0	0	4	5	-7	0	12	34
1614	-18	-5	12	0	-2	-18	-4	-22
1615	24	26	-3	62	9	0	8	20
1616	10	-6	3	-5	8	-1	-2	1
1617	-5	17	-7	20	0	17	19	-68
1619	-95	5	5	0	-23	-2	9	-109
1621	8	-7	19	-7	3	-1	-2	28
1623	-10	4	0	4	-6	4	-3	-10
1625	-2	13	0	13	3	-2	50	0
1626	0	-5	8	2	2	-5	-2	24
1627	7	13	4	13	4	8	12	-2
1628	4	11	5	6	2	2	9	15
1630	-1	7	-1	4	-1	7	11	-1
1631	0	-2	0	-2	0	-2	6	-10
1632	0	2	0	2	0	2	11	0
1634	0	2	2	7	2	-4	-15	10
1635	0	3	0	3	0	0	-9	27
1636	6	-3	-5	6	0	-17	-1	6
1637	5	-4	2	-10	-6	0	-4	-2
1638	0	3	4	3	0	2	4	-33
1639	-14	7	-87	13	-9	9	7	-5
1640	-5	-19	-3	-21	-6	-11	90	48
1642	0	-4	10	-4	-4	-4	-8	-1
1643	12	17	6	17	17	11	17	17
1647	-3	18	23	23	-3	-8	20	-45
1649	31	-8	35	-3	23	0	-5	41
1650	7	4	25	4	0	0	16	16
1651	0	0	0	4	0	-13	0	11
1653	-4	-6	0	-6	-29	-6	0	-33
1654	-9	-16	-8	-11	-8	-21	-21	-21
1655	-3	-12	0	-18	8	-16	3	12
1656	9	6	6	-3	-1	6	-7	12
1657	-8	-8	0	2	5	0	-8	5
1658	8	135	9	-8	24	-15	152	178
1662	7	-1	11	-1	3	-10	5	1
1664	4	9	3	5	8	0	14	12
1665	0	0	0	0	0	0	4	0
1666	0	0	2	0	0	-6	2	4
1667	-2	6	-2	11	-2	20	10	24
1668	-4	5	-1	1	0	1	10	2
1669	0	1	0	-31	0	1	2	4
1670	10	0	0	0	0	-4	0	0
1671	0	-4	2	-19	2	-11	-2	-9
1672	9	-23	16	-33	12	-1	-21	14
1674	8	7	16	4	3	2	1	17
1675	7	6	-5	-6	0	1	15	21
1676	2	-6	3	-6	3	0	8	4
1677	0	-15	8	-15	-7	0	-6	-6
1678	-3	3	-3	3	-7	3	11	-6
1679	2	1	0	2	-3	-5	11	-6
1680	-1	4	-1	6	1	4	6	-1
1681	5	-12	140	-12	10	2	-16	92
1682	17	0	23	0	0	0	6	-5
1684	0	0	6	0	1	0	0	-12
1685	-1	6	-4	6	15	6	6	6
1686	-69	35	-46	-65	-3	11	-65	11
1687	-16	-30	0	-36	-9	-30	-5	-10
1688	1	-3	9	-4	6	-4	3	6
1689	0	13	0	6	0	0	12	0
1690	20	-56	19	-39	14	-58	-52	17
1691	-1	-8	-1	-8	-1	-8	-5	-8
1692	-2	-23	-6	4	-6	0	-23	-2
1694	-2	-3	13	0	-7	0	0	10
1695	3	-4	3	1	3	-6	-1	3
1696	9	9	5	0	1	0	13	-11
1697	-3	4	-1	6	0	4	20	-12
1699	-5	0	-1	0	9	0	10	-18
1701	0	6	0	6	0	3	29	0
1702	2	12	0	-2	0	2	27	-29
1703	0	-4	51	13	0	-3	1	-5
1705	-9	0	7	2	5	-2	-2	0
1706	-1	-5	0	-12	-1	-5	0	1
1707	0	2	12	2	3	4	2	-2
1708	30	-10	98	-4	-2	-10	-3	30
1709	2	-4	2	0	0	0	-3	8
1710	-3	-9	-7	9	3	4	76	-17
1711	13	-5	9	-5	2	-6	2	4
1712	0	14	0	18	0	7	18	0
1713	-3	-25	3	-26	-5	-9	-21	-14
1714	13	8	10	7	0	0	19	28
1715	0	0	0	0	-10	-10	-19	14
1717	0	5	0	5	0	5	11	-12
1718	1	-2	-18	-4	-8	-16	3	-21
1719	-9	-7	1	1	-14	-9	-7	-18
1721	-3	-5	-3	4	0	-3	4	-3
1722	0	6	9	1	3	0	14	2
1723	0	19	5	19	13	19	27	0
1726	5	-16	9	-16	7	-9	-7	31
1729	0	6	8	6	2	0	3	4
1730	-1	15	-4	15	-2	-1	25	-4
1731	-29	-2	-4	-2	18	-15	2	4
1732	5	-4	4	-4	2	-8	5	-11
1733	-5	13	3	0	8	0	0	4
1734	0	5	5	-3	3	11	7	3
1736	6	5	4	5	-3	3	-1	0
1738	0	2	-24	2	-1	-28	8	-28
1739	3	5	3	5	3	0	12	3
1740	0	0	3	-3	0	0	-4	-8
1741	0	0	-3	0	1	0	0	5
1742	1	17	0	17	-3	5	17	-13
1743	5	-17	11	-17	-5	-15	-17	-5
1744	0	0	0	0	0	0	6	5
1745	-9	4	-4	2	-4	0	1	-9
1747	0	10	0	12	22	0	17	22
1748	1	-38	15	-38	8	-33	-37	60
1752	4	0	10	15	4	0	6	7
1753	6	1	3	2	3	11	4	-8
1754	7	-7	7	-7	4	0	-1	28
1756	0	-5	0	-5	5	-5	-6	-9
1758	-3	-9	-6	-9	0	-20	145	4
1759	3	-4	3	-4	0	-6	-38	33
1760	3	-10	9	-11	0	-15	-7	3
1762	-4	-19	5	-9	5	-13	-16	16
1763	0	7	1	7	0	0	12	-12
1764	0	4	2	4	0	0	8	0
1766	3	-3	1	-1	3	-3	3	0
1767	11	11	9	14	-5	2	4	10
1768	3	-6	3	1	3	-2	23	-16
1769	3	-36	2	-38	0	-75	-42	-2
1770	30	1	31	2	2	7	8	23
1771	0	-6	4	-2	0	-2	-6	10
1774	4	3	13	3	3	3	-27	15
1775	2	-7	2	-7	-4	-7	-4	-22
1776	0	0	0	0	0	0	-7	-4
1777	13	-19	17	-19	6	2	-7	-16
1778	-125	2	6	9	-60	-140	22	28
1779	3	0	0	0	0	0	2	3
1780	-3	0	143	0	-3	-3	-26	116
1781	2	3	4	4	-1	-1	16	15
1782	4	3	-1	3	4	3	4	-2
1783	-7	-19	3	-25	7	-19	-14	12
1784	4	-1	-1	0	-4	0	2	4
1785	13	-5	21	-7	21	0	-3	5
1786	0	-6	-4	-6	-1	-10	0	6
1787	6	0	17	0	-1	0	0	-7
1788	0	-6	0	-6	0	0	-6	-7
1789	-17	-16	4	-16	4	-13	-8	-9
1791	-20	-24	13	-19	-5	-39	-24	-26
1793	5	0	3	0	-10	0	0	-6
1794	0	-14	3	-14	0	-11	-11	10
1795	12	-5	14	-10	0	-3	4	12
1796	29	29	98	-13	-6	13	155	148
1797	-3	-12	1	-8	5	-5	-6	39
1799	5	-3	2	-5	0	-6	-1	0
1800	4	5	21	5	5	6	5	15
1801	-1	-33	4	-34	3	-21	-9	-18
1802	0	0	0	0	0	0	14	0
1803	9	-7	9	-11	0	2	10	10
1804	0	-8	20	-5	8	-8	0	8
1805	0	0	3	0	0	0	6	-5
1806	4	-1	21	-1	11	-10	36	50
1807	-11	0	-1	0	8	0	-2	1
1809	11	-3	15	-3	0	-3	10	13
1811	1	-22	9	-27	7	-14	-26	22
1812	-11	-30	-7	-25	-11	-23	-22	-11
1813	1	-1	7	-1	3	-1	7	12
1814	16	0	56	6	11	1	7	-12
1815	2	-1	2	-5	2	-1	9	2
1817	-10	-3	8	-3	8	-6	-8	-4
1818	1	-2	11	2	11	0	-3	4
1819	0	-13	1	-13	2	-8	4	6
1820	9	-2	4	-2	0	0	13	-9
1821	0	-5	0	-5	0	-9	0	6
1822	9	1	8	-6	0	9	-1	9
1824	-2	-5	19	-2	19	-2	-229	-208
1825	6	1	2	1	4	1	-1	14
1826	4	-1	37	0	0	0	9	22
1828	1	-121	-73	-123	4	4	-199	4
1830	-2	-21	0	-13	0	-13	-21	3
1831	0	-4	0	-3	0	-3	-1	-9
1833	8	3	8	3	0	2	6	7
1834	-5	2	-5	2	-5	2	8	-18
1835	0	-2	0	-2	0	9	8	-12
1836	14	-104	14	-108	-8	-98	27	14
1837	6	-5	14	-5	3	-5	-1	11
1838	16	-21	25	-21	21	23	-21	25
1839	24	-32	27	-18	6	4	-26	35
1840	-13	-4	9	4	0	-13	1	0
1843	2	7	2	15	0	5	11	-5
1844	-85	3	21	4	7	-6	8	-81
1845	0	-3	0	-3	0	-8	-3	-7
1846	0	5	0	5	6	8	7	23
1847	87	-6	21	-6	2	55	-6	69
1848	0	-6	2	2	5	0	-11	13
1849	-6	-3	-20	-9	-17	0	-24	-22
1850	12	-5	16	0	8	-5	1	23
1852	-11	-16	-1	-14	0	-23	-20	1
1853	-6	17	-7	17	-6	-1	12	-8
1856	0	6	0	6	0	0	-5	-10
1859	4	4	5	0	9	-5	15	9
1860	0	8	0	6	0	3	12	5
1861	10	-9	14	-9	12	-7	10	21
1862	5	-2	15	1	4	-2	1	7
1863	-6	13	-13	16	-6	5	16	-15
1864	6	-4	4	-4	1	-4	4	-9
1865	3	-43	3	-10	4	-33	-33	-15
1866	-1	2	-3	-3	-3	-5	9	18
1867	2	-1	10	-1	-2	-1	12	-3
1868	33	16	40	6	5	-11	-11	55
1869	0	3	6	0	4	0	14	4
1870	-1	4	2	1	-1	-2	12	3
1871	3	-4	10	-4	0	-4	1	55
1872	158	185	44	181	160	-17	100	185
1873	6	12	6	12	3	-3	32	-2
1874	7	12	22	8	14	9	8	33
1875	-28	-27	-13	-27	34	4	-15	-34
1876	-76	-48	0	-86	-8	-38	-71	-41
1877	-5	-4	1	-4	-1	-4	28	-3
1880	8	-11	-1	-23	1	3	-11	-38
1881	-9	2	-7	7	-1	0	4	-12
1882	-5	-10	-5	-10	-3	-7	0	-3
1883	5	-7	9	-3	5	-5	8	5
1884	5	1	4	5	-1	2	5	3
1885	-10	9	0	9	0	8	12	-47
1886	17	-20	27	-20	17	-26	-20	19
1889	0	1	40	2	1	0	12	15
1890	4	-48	5	-54	2	-54	-45	2
1891	3	-10	-4	-5	-5	3	-22	-9
1892	17	-38	10	-69	14	-38	12	13
1893	3	-4	4	0	3	0	8	3
1896	0	-9	0	-8	0	0	-8	-8
1898	-11	-9	-5	-1	1	-6	22	-8
1899	-1	2	-5	-4	-4	2	-21	-8
1900	-32	-12	-70	-195	-5	-14	-10	-30
1901	5	2	3	2	2	-6	42	-4
1902	9	-11	1	-12	-5	-18	-13	9
1904	16	1	0	1	14	0	1	24
1905	15	-19	16	-19	0	-20	-14	25
1906	8	-4	8	0	1	0	23	8
1907	2	-3	1	-3	1	-3	-27	1
1908	63	-18	51	71	-18	-24	21	57
1909	-4	1	-4	0	0	0	-6	-4
1910	21	0	22	0	8	0	3	23
1918	-3	10	21	-9	22	-124	-52	24
1919	1	-51	46	-51	1	-36	-33	32
1920	1	-1	10	-2	0	-3	8	11
1921	0	-2	9	0	5	7	-2	-7
1922	-4	-9	-4	-9	0	-9	-62	-53
1923	2	-5	2	-5	20	-3	-3	22
1924	3	-2	5	0	3	-2	6	-7
1925	14	5	4	8	0	0	-12	7
1926	-39	11	-22	6	1	12	11	-50
1927	89	25	38	38	6	0	95	12
1928	-1	7	72	7	-1	7	7	33
1929	8	-7	13	-4	5	-3	2	-8
1930	3	-3	3	-3	3	-3	2	16
1931	-10	-55	5	-57	5	-55	-26	32
1934	0	-10	5	-4	0	-5	1	12
1935	0	4	-2	4	0	4	-66	31
1936	3	3	8	8	0	0	8	4
1937	-4	-1	16	-1	-1	-4	1	6
1938	0	-7	15	-7	15	-7	-9	26
1939	-3	-28	-8	-25	0	-28	-22	74
1940	-2	3	0	-3	-2	2	6	-8
1941	4	2	4	6	4	10	13	-1
1942	4	3	4	6	4	10	13	-1
1943	10	-7	21	-6	-3	-9	29	10
1944	0	-4	0	-4	-1	-4	13	-6
1945	9	1	9	1	-1	-1	14	9
1946	-1	1	1	4	7	4	-1	27
1947	16	-4	37	2	-3	-1	-1	-18
1948	0	15	0	6	5	6	22	0
1949	0	0	6	0	0	-3	7	14
1951	74	0	18	70	19	0	0	24
1952	-1	13	8	-4	-1	3	1	0
1953	33	4	8	1	-3	0	34	7
1954	0	-11	-3	-11	0	-11	5	0
1955	0	-13	0	-13	0	-17	-13	0
1956	0	-15	3	-12	3	-5	5	3
1957	-35	3	6	3	-14	11	-5	33
1958	0	17	0	0	0	0	14	11
1959	-9	-36	0	-36	0	-36	-29	6
1960	-14	-1	1	-4	80	-4	175	-14
1961	-121	-130	-12	-144	0	-135	-132	0
1964	5	-6	-5	-6	0	-6	25	-14
1966	6	-3	10	1	5	-3	-3	0
1967	3	5	3	5	3	0	1	-2
1968	44	-33	53	-33	15	-31	-28	16
1969	51	11	11	4	-2	4	34	39
1970	9	-2	14	7	-2	-31	11	-2
1971	4	7	28	-10	-1	-2	13	-3
1972	0	0	0	0	0	0	4	-11
1973	7	15	1	8	-5	12	-13	8
1974	0	-8	0	-3	0	-4	4	-5
1975	-1	-4	1	-3	0	0	1	-3
1976	3	0	3	0	-3	0	-3	-16
1978	0	-12	14	0	-4	0	-2	5
1979	10	19	18	24	-3	23	0	9
1980	-2	22	-2	14	-2	14	26	-5
1982	0	0	0	4	3	0	-2	6
1983	7	-7	-1	5	3	14	14	-1
1984	-1	1	5	3	-2	-2	9	-3
1985	16	-11	5	-11	5	-5	6	5
1986	10	-8	6	-8	3	-2	9	0
1987	96	-24	96	-33	-31	-33	-23	55
1988	-11	-15	19	-23	5	-23	20	13
1989	-2	-15	3	-15	-2	-13	-16	21
1991	0	0	1	0	0	-2	20	43
1992	0	-5	4	-4	12	-4	-30	51
1993	-4	18	18	18	0	-8	22	-27
1994	-6	5	-37	10	-13	5	8	2
1996	14	-23	22	-23	1	-25	-31	22
1997	-7	114	-5	61	-5	0	112	14
1998	0	0	0	3	6	0	3	-43
1999	9	-26	9	-27	8	-16	-19	6
2000	103	103	103	103	103	103	-44	103
2001	199	0	4	0	2	0	3	10
2003	-160	-25	-19	-15	0	-166	-6	7
2004	3	3	-3	-3	-3	3	-14	3
2005	1	6	0	-6	-12	12	2	-12
2006	-32	-20	-1	-22	0	-32	-4	13
2007	15	0	17	6	13	13	7	28
2008	10	10	23	10	7	7	10	-2
2009	-4	-9	0	-5	4	-10	-14	-16
2010	-10	-3	3	-3	3	-3	0	1
2012	10	12	9	9	-3	0	15	-24
2013	5	-7	5	-7	3	-7	-7	56
2014	6	9	8	7	6	8	9	6
2015	0	-5	2	-5	2	-6	2	6
2016	-3	6	-1	1	2	1	10	9
2017	-4	-16	3	-4	0	-16	-7	0
2018	-21	-10	3	-21	-6	-12	0	-19
2019	0	-14	0	-11	0	0	0	0
2020	96	73	80	34	-3	163	22	82
2022	5	-6	8	0	0	0	8	-3
2023	1	0	8	0	8	0	0	34
2024	1	9	7	3	7	0	14	0
2025	27	-2	-6	-1	9	3	3	-31
2027	5	-2	4	-22	4	-2	-11	10
2028	0	-3	0	-3	0	-9	15	-8
2032	6	-4	6	-2	2	-6	4	1
2033	5	-7	14	-13	14	-9	-1	13
2034	0	9	0	3	0	7	20	-2
2035	-14	-2	-1	4	-6	-9	11	8
2036	-3	6	0	6	0	0	6	6
2037	0	-3	-6	-3	6	-3	-7	-26
2038	-14	-4	-11	3	-15	3	-4	-16
2039	7	0	5	0	4	-7	12	5
2040	45	-1	45	-1	14	-29	-23	40
2042	2	12	15	5	15	5	17	9
2043	-148	-153	28	-148	-123	-153	-151	-119
2044	12	-4	18	-3	23	-3	0	-5
2045	0	-17	0	-14	0	-11	-11	0
2046	-4	12	-10	12	-4	-7	8	-14
2047	6	-1	6	0	1	0	43	4
2048	7	9	0	7	0	8	17	0
2049	-19	-8	2	12	0	0	-5	-29
2051	0	0	7	0	7	0	2	18
2052	0	13	7	20	1	9	21	-31
2053	5	5	9	0	0	5	9	-1
2054	3	0	4	0	0	0	0	-6
2055	4	21	-10	21	5	19	22	-38
2056	16	-19	23	9	0	-6	-11	125
2057	-12	11	-11	11	-25	11	4	-30
2058	-12	11	-11	11	-25	11	4	-30
2059	18	8	18	8	6	8	16	0
2062	5	8	60	8	0	5	-8	6
2064	2	6	3	6	3	0	9	10
2065	5	8	3	5	0	6	8	-129
2066	23	-28	18	-31	0	-23	-28	-27
2067	2	-10	19	25	-4	-83	-33	-62
2070	2	-6	7	-7	-4	-3	0	-3
2071	3	0	3	18	0	-3	3	13
2072	3	-10	3	2	1	-12	-8	25
2074	-1	1	-7	-1	0	-13	0	0
2075	0	0	46	0	1	0	157	0
2076	3	-7	3	-8	0	-10	8	-13
2078	-49	-4	-48	-4	1	-9	5	-48
2079	0	3	0	-2	0	-6	3	15
2080	10	2	12	127	-8	0	2	0
2082	10	-8	36	-8	5	-7	-1	36
2083	-24	18	23	23	9	12	86	20
2085	-35	133	-24	-33	-21	158	119	-30
2086	-1	9	-7	9	12	9	23	-7
2087	2	2	0	2	0	2	5	0
2088	5	-7	5	0	5	-13	-12	5
2090	17	0	17	0	4	1	10	-71
2091	3	-11	3	-11	0	-11	-9	7
2096	-74	-163	10	-156	-73	-173	-166	-171
2097	0	-11	0	-5	0	-5	-5	-6
2098	0	0	6	8	0	2	6	0
2099	-3	-8	1	-8	-3	-3	1	-14
2100	-3	-10	11	-10	11	-10	0	11
2101	10	4	0	-4	0	-14	14	-10
2102	6	-1	16	7	16	2	9	7
2103	-2	12	0	-1	9	-4	17	-3
2104	-18	-4	-18	0	9	-18	-4	-23
2105	-16	-2	-16	-4	-4	-22	-8	-16
2107	-3	-11	-3	-14	0	-5	4	8
2108	-3	1	0	-10	0	-8	8	9
2109	2	5	5	4	0	10	30	2
2111	2	0	2	0	2	0	9	0
2114	25	0	39	23	0	-9	-1	1
2115	3	-7	5	-5	3	-8	-5	3
2116	2	-17	17	-13	18	-5	-9	-7
2118	3	-2	9	-2	0	6	-12	-3
2119	2	-4	32	-5	4	-3	10	39
2120	0	9	0	0	0	9	13	-1
2121	-3	-4	8	-22	-3	-3	-3	-1
2122	5	-2	10	-2	2	7	2	16
2123	12	-8	19	-12	-5	-9	-3	5
2124	0	-8	0	3	0	-3	0	-6
2126	0	9	0	9	0	9	11	0
2127	-2	-2	4	-2	-6	-2	-2	2
2128	12	-8	2	6	-16	-8	10	-3
2129	8	-8	0	-2	0	8	-2	0
2130	-4	-6	-4	-2	-10	0	-1	-13
2131	-187	-13	-183	-196	-5	-197	-159	-6
2132	149	1	78	1	10	-4	6	6
2133	8	-5	8	-2	1	-4	-5	3
2134	9	-6	9	-2	5	-4	4	9
2135	8	5	8	-8	6	-10	5	-2
2136	26	8	36	-7	9	-1	-5	35
2137	9	-6	7	0	-5	-12	-3	-14
2138	-3	11	6	11	0	-3	11	-7
2139	-3	3	-3	3	-3	0	8	0
2140	0	6	9	6	-2	6	6	1
2141	0	-3	0	-3	-3	-2	-1	-11
2142	-4	4	0	2	-2	2	8	-27
2143	-2	13	7	7	-2	7	13	-3
2144	0	-12	4	-12	-3	-9	-10	37
2145	-9	-4	26	4	12	4	3	-6
2146	-3	0	-3	-4	0	5	0	0
2147	-2	-10	0	-23	0	0	7	3
2148	-1	-14	1	-19	-5	-18	-5	-8
2150	-7	-19	2	-11	-7	-18	-3	3
2151	4	-11	9	-8	8	-1	-1	15
2152	0	30	69	25	0	-9	117	30
2153	2	5	-1	5	-1	6	-5	12
2154	24	-6	28	5	8	3	28	12
2155	0	0	0	8	0	-15	8	11
2156	1	-2	2	1	1	-6	6	-8
2157	0	-12	0	2	0	0	-30	5
2158	0	-2	0	-8	0	0	-23	5
2160	8	7	9	1	-5	2	7	0
2161	-2	-3	-12	-12	-3	-3	-27	-22
2162	0	14	0	10	0	-4	0	0
2164	-2	-2	5	3	5	-4	-2	1
2165	-4	-12	7	-4	7	-5	0	18
2166	10	5	8	3	0	5	6	-12
2167	-1	1	21	-13	-10	-29	-6	-22
2168	0	-9	6	-9	6	-9	-9	4
2169	3	-1	0	-4	0	-1	15	16
2170	-7	-12	0	-16	-4	-7	0	-12
2171	15	0	15	0	9	0	0	16
2172	0	-1	4	-8	0	-4	-6	0
2173	3	-4	5	0	9	-6	12	5
2175	8	0	16	-9	0	-7	-10	8
2176	0	-5	0	-5	0	-2	-5	126
2178	5	9	5	3	5	-1	17	18
2179	0	-10	0	-10	0	0	-14	-7
2180	-11	-13	-3	-15	-3	-15	-10	7
2181	10	2	10	2	10	7	2	12
2182	1	-3	29	-23	2	-23	7	38
2183	0	0	-1	0	-5	0	5	39
2184	0	-5	0	-4	0	-1	14	-2
2185	19	9	52	9	3	-2	9	-25
2186	16	-3	27	2	2	-1	-8	24
2189	-6	-4	7	-4	7	-4	-2	14
2191	0	0	-8	0	-6	0	10	-1
2192	0	3	-8	0	-6	0	12	-6
2193	0	9	-4	10	-3	2	12	3
2194	3	-7	5	1	3	1	-4	8
2195	0	-5	6	-5	0	0	2	13
2197	4	-9	4	-9	4	-9	-4	3
2198	3	5	8	5	3	0	17	-5
2200	-5	0	-5	-11	-14	-18	29	0
2202	0	-7	0	-22	0	-28	-5	9
2203	-6	0	1	2	0	0	18	16
2204	2	-5	3	-5	2	-9	0	-1
2205	0	-98	10	-16	0	-98	10	7
2206	6	-7	5	-9	-2	0	-1	4
2207	23	-1	73	-1	10	-1	15	-12
2208	-2	-28	5	-8	2	-12	2	23
2209	40	125	-5	45	-5	18	123	-1
2211	-23	-10	-25	-21	0	-24	-1	-17
2212	2	5	2	1	2	-2	13	15
2214	11	10	24	0	6	0	15	5
2217	-5	0	10	7	9	3	-1	3
2218	0	3	9	0	1	2	12	16
2219	0	3	9	0	5	2	12	16
2220	-2	-17	25	-35	29	5	161	187
2221	0	-2	0	-8	-1	-9	18	-1
2222	0	-4	4	-4	6	3	2	18
2223	5	-2	8	0	8	0	9	8
2224	0	0	1	0	0	0	9	-4
2225	8	1	8	0	8	0	3	23
2226	-3	1	5	5	-3	2	5	14
2227	-14	-10	-5	-10	-3	-11	-11	-1
2228	0	-16	0	-14	0	-19	-7	0
2229	3	-3	3	0	3	-3	0	-10
2230	3	-9	4	-5	3	-5	3	7
2231	0	0	5	0	5	-3	0	-8
2232	0	-3	1	-8	0	-3	0	1
2233	-3	-14	0	-9	-13	-6	25	-6
2235	0	-10	0	-10	0	-12	-8	8
2236	0	-18	0	-21	0	-16	0	0
2237	0	-13	9	-12	0	-19	11	27
2238	0	-13	0	-10	0	-6	-4	9
2239	1	-11	1	-14	1	1	-7	11
2240	65	-8	54	-8	42	1	48	48
2241	10	-36	0	-33	0	-33	-21	0
2242	-25	-13	-29	-7	-15	-31	-12	-43
2243	3	0	11	0	3	0	3	13
2244	22	-22	20	-22	12	34	7	128
2245	2	-10	8	-10	-6	-1	2	-2
2246	2	-10	8	-10	-6	-1	2	-2
2247	0	6	-1	-6	5	-5	-5	4
2248	0	13	0	13	0	24	38	-8
2249	27	30	20	30	0	14	-23	28
2250	-9	0	-9	-6	-6	-9	-16	-4
2251	4	-4	6	-4	4	-4	27	20
2252	9	-8	14	-8	14	-7	1	-8
2255	6	-11	0	-11	0	-8	-5	0
2256	0	10	-3	-2	1	-2	14	8
2257	-40	47	-24	-7	-16	-28	-17	-55
2260	0	1	1	-9	7	1	1	18
2261	23	11	43	-2	4	0	12	6
2262	4	-27	4	-10	4	0	1	4
2263	-5	15	10	-3	-11	3	118	0
2265	9	0	7	0	8	1	4	10
2266	1	-3	5	-3	0	-4	-2	11
2267	8	8	6	0	0	8	8	-57
2268	0	19	0	0	0	0	42	1
2269	6	-4	10	-4	6	-4	4	10
2271	3	1	5	1	-5	0	-4	1
2272	6	-5	2	1	3	1	4	8
2275	-5	5	-5	5	-5	5	5	-5
2276	0	-16	2	0	0	-13	-7	12
2277	2	-12	2	-7	2	-7	-8	13
2278	2	-14	2	0	2	-3	7	15
2279	-3	-1	-6	-1	-2	-1	11	0
2280	0	-2	2	-2	2	4	-6	-3
2282	5	5	6	8	9	5	20	17
2283	5	11	6	-12	8	-12	12	11
2284	6	0	8	0	4	0	3	16
2285	-3	0	-8	0	-4	0	12	-9
2286	17	0	-1	-17	2	-20	14	43
2287	-5	-15	9	-6	9	-5	7	137
2288	36	-20	-2	15	-2	11	20	29
2289	1	26	3	8	2	1	9	-4
2290	0	-3	5	-3	0	-1	-3	5
2291	-45	-46	0	-46	0	-45	-45	-46
2293	0	-8	3	0	0	0	-4	-5
2294	-2	18	21	4	-1	0	44	-6
2295	3	3	1	0	0	-3	17	-4
2296	3	-10	3	-6	3	-7	-15	8
2298	2	-3	0	-3	2	3	15	3
2299	11	8	6	10	6	11	16	10
2300	0	7	14	39	-1	-1	7	-1
2301	2	2	0	2	-1	2	7	6
2302	8	13	8	0	8	-1	10	8
2303	-1	1	0	-6	0	-12	-4	-3
2304	0	-9	5	-9	5	-10	8	5
2305	12	-3	9	-6	2	-3	-3	42
2306	2	-5	12	0	2	0	-2	4
2308	-32	-44	-27	-34	-23	-89	-88	-15
2309	6	-36	9	-11	8	-16	-37	9
2310	4	-16	4	-11	-5	-10	2	-5
2311	13	-27	38	-27	-1	-2	-5	33
2312	0	-8	0	0	0	-8	-16	6
2313	0	0	1	0	-3	0	7	-4
2314	1	-2	1	2	1	2	13	2
2317	-6	33	7	24	11	20	21	17
2318	3	-18	10	-18	13	-3	-17	28
2320	3	-8	1	-12	0	-23	0	3
2321	-6	-5	-10	-17	-10	-12	2	-10
2323	137	-10	73	-10	0	-10	-7	17
2324	-23	9	-11	6	24	0	9	-31
2325	-4	2	-3	1	-1	-2	19	-12
2326	0	8	3	-10	3	-11	12	-10
2327	0	-11	21	-11	21	-6	-4	-1
2328	-5	-3	5	0	-13	0	1	-13
2329	-27	12	9	16	6	22	8	-54
2330	-1	3	4	0	-1	0	7	19
2331	6	9	1	-7	-4	6	23	1
2332	-2	9	-2	0	2	9	19	-5
2333	0	-1	2	-1	3	9	7	2
2334	-4	1	7	3	-8	-4	3	-4
2335	-2	-7	-4	7	-10	-4	8	-22
2336	-28	-45	4	-38	-12	-38	-19	-35
2338	39	0	-2	-55	0	5	11	-42
2339	-2	-22	10	6	10	-25	53	1
2340	3	0	3	3	-1	0	3	-11
2342	0	-37	-3	-6	-4	-9	-41	-5
2343	0	-9	-17	-1	5	-1	-3	9
2344	11	-3	41	-24	-3	0	11	-19
2347	-52	-171	13	-164	10	-316	13	-106
2349	0	15	13	-4	-4	-2	15	50
2350	-5	11	-5	12	11	21	23	-5
2352	0	8	5	-6	-5	0	8	10
2353	7	7	13	2	15	-3	7	2
2354	-6	-9	-6	-8	-6	-1	9	-8
2355	0	-13	0	-13	0	-13	-10	0
2356	13	-6	17	-8	21	17	4	20
2357	0	-8	4	0	2	0	12	18
2358	3	-1	3	-1	3	-10	-5	-16
2359	10	-4	8	-1	11	-1	-4	19
2361	7	-6	15	-6	8	-5	4	12
2363	0	-27	0	-24	0	-16	-22	-3
2364	1	-8	8	-3	0	1	19	8
2365	-10	-7	-13	-3	-3	-8	-2	-13
2366	0	8	6	8	7	0	14	-11
2367	-3	-3	6	-14	10	-14	-1	-8
2368	2	-31	0	-33	1	-37	0	-2
2369	0	0	0	0	0	0	10	-5
2370	3	-4	17	-9	1	-59	-79	0
2372	-2	7	2	6	0	11	2	-7
2373	-5	2	6	7	7	-3	10	10
2374	4	-11	4	-6	-2	-11	-16	0
2375	39	53	-3	48	-1	46	59	3
2377	-2	-8	-2	0	-3	0	0	-3
2378	-22	1	-4	-6	0	-29	11	-9
2379	1	-8	3	1	0	-1	-11	-14
2381	14	-23	-29	-55	-14	-11	-19	-20
2382	1	-4	11	-3	0	0	6	20
2384	0	-2	34	0	-5	0	20	-14
2386	29	-3	23	-3	0	0	1	19
2388	2	-12	2	-6	0	0	-4	2
2389	12	4	12	-6	10	2	8	10
2390	5	-10	7	-8	3	-14	-16	-2
2393	-7	-8	9	-8	2	-9	-3	-7
2394	3	-4	0	-4	0	0	-4	5
2395	-1	8	-2	8	-1	0	12	-5
2396	16	11	4	11	6	7	14	39
2398	0	-8	0	-11	0	0	5	-24
2399	-4	-6	4	-13	3	-12	-3	27
2401	10	-20	11	-27	-3	-5	-20	7
2402	3	10	0	0	0	3	35	10
2404	2	0	2	-11	2	0	11	19
2405	2	1	8	6	9	1	6	-10
2407	2	36	17	84	12	47	27	82
2409	0	-5	0	-3	0	-3	-3	24
2411	0	10	0	11	0	11	11	-9
2412	5	12	9	7	0	-4	12	-23
2413	1	0	2	0	-1	6	-7	1
2414	0	5	0	0	0	0	8	-10
2416	-8	0	-30	10	0	-24	2	-48
2417	0	-8	-1	-8	-3	0	-3	-1
2418	-3	3	-1	3	0	-1	11	1
2419	2	2	2	-6	10	-6	1	3
2421	-7	-6	-2	-6	-6	-6	-9	1
2423	-5	-24	7	-22	1	-26	-37	7
2425	-4	-10	-2	-13	-2	-2	-19	-4
2426	-8	-20	16	-14	2	-11	10	17
2427	14	5	14	2	14	-4	9	2
2428	0	-15	0	-20	0	5	-11	-3
2429	-3	-16	-3	-15	-3	-16	2	9
2430	4	-9	4	-9	4	-5	-5	9
2432	-6	4	0	4	-1	4	13	-9
2433	-5	5	1	5	0	5	14	-8
2434	8	-12	8	0	0	0	-12	-13
2436	-83	98	-77	68	-44	59	45	44
2438	2	-43	-5	-4	-4	4	-14	13
2439	1	-35	2	-6	1	-12	-40	36
2440	-3	11	3	6	3	5	15	7
2442	0	-9	0	-10	0	-4	-4	4
2443	19	14	29	32	-2	-2	33	-39
2444	7	-6	9	-1	3	-1	6	9
2445	8	34	18	24	-24	0	39	8
2446	0	-2	0	-2	0	-1	-7	5
2447	5	5	0	1	0	5	15	5
2448	0	-3	-10	-3	-10	0	-5	-18
2449	-2	2	1	-5	-2	-9	17	16
2450	0	-24	0	-23	0	-21	-18	-6
2451	4	-3	6	-1	6	-37	12	10
2453	8	8	8	8	-10	4	4	-9
2454	0	3	0	3	0	-3	12	15
2455	11	-3	12	-11	2	8	2	99
2456	0	0	-12	-3	-2	0	10	-11
2458	0	3	1	3	1	0	5	4
2459	8	-14	20	0	3	-3	-5	-2
2460	-15	0	-29	0	5	-19	0	-15
2461	-15	0	-29	0	5	-19	0	-15
2463	17	9	19	14	13	-9	14	-21
2464	4	-43	60	-25	-2	-21	-39	59
2465	17	-6	15	-26	-1	-25	6	14
2466	0	-11	0	-11	0	-4	-5	6
2467	5	-11	5	-9	5	-5	-7	5
2469	1	0	-2	0	1	2	-6	13
2471	2	-15	2	-15	0	-5	-10	9
2472	0	-6	3	-4	3	-6	-6	21
2473	4	0	4	-3	5	-4	5	6
2474	-5	-9	-2	-7	-2	-6	-14	2
2475	-18	-8	-3	2	0	6	-25	2
2476	9	6	-2	4	0	6	38	0
2478	6	-17	3	-4	6	-4	-7	11
2479	5	-2	-2	-2	-2	-3	0	-3
2480	-27	-9	47	0	-27	-36	-9	12
2481	3	-15	3	-14	3	-12	-5	-7
2482	6	-1	13	-4	11	-2	7	-2
2483	10	-4	18	-8	10	-8	-4	7
2484	3	-2	16	5	3	7	7	12
2486	0	0	0	-9	0	5	9	21
2488	0	3	15	0	6	0	4	-2
2489	-2	5	-2	0	-2	0	5	2
2490	17	-23	85	0	0	8	-8	9
2491	8	-5	8	-8	0	-8	18	8
2492	0	0	0	0	1	0	0	-6
2493	0	0	0	0	0	0	3	18
2494	5	-4	14	-9	6	-5	-4	21
2495	5	-6	6	-6	1	-1	3	11
2496	-5	-6	0	-7	4	-7	-2	29
2498	-1	-5	1	-5	9	-5	5	8
2499	0	6	0	6	5	0	2	4
2500	17	-8	37	13	2	11	-11	-2
2501	3	8	14	5	1	9	11	7
2502	-6	0	-6	0	-6	0	0	-9
2503	-1	-4	9	-4	7	-9	-4	0
2504	12	-3	3	-6	0	-6	13	36
2506	-22	-21	-22	-18	104	-19	93	-22
2507	1	-3	16	-3	5	1	-3	21
2508	17	-13	43	-16	15	-20	-20	23
2509	0	0	0	0	0	0	8	-13
2512	21	0	9	21	7	3	3	-6
2513	11	2	-18	5	-1	5	5	-6
2514	-23	-35	0	-9	-5	-35	-8	-9
2516	10	-12	28	-10	0	-6	8	20
2517	0	-14	-3	-14	0	-6	-13	-4
2518	0	-12	13	-12	3	-4	2	32
2519	0	-10	1	-10	-1	-10	-9	-9
2520	6	0	6	0	-2	-2	1	-2
2522	-2	4	2	12	8	28	4	24
2523	-5	-6	-3	-6	19	-4	1	40
2524	-4	1	0	1	0	1	1	-12
2526	57	10	50	12	1	9	12	-20
2527	1	-27	1	-7	1	-3	-7	19
2530	0	-9	0	3	3	-9	3	3
2531	14	0	10	-47	-10	0	5	-15
2533	0	0	1	3	3	3	7	-7
2534	2	2	2	-3	2	7	2	15
2535	8	-16	11	-16	7	-10	-9	8
2536	5	4	1	4	9	22	26	25
2537	-13	3	-6	5	0	-16	15	0
2538	0	-4	0	4	0	-1	8	0
2539	5	-42	10	-33	5	-37	-25	13
2541	1	0	5	0	1	0	17	2
2543	3	-1	18	-1	3	-1	3	89
2544	0	3	7	3	0	-3	3	0
2545	-12	-3	-12	-4	-2	-2	-13	-12
2546	5	1	0	0	-4	0	10	-10
2547	6	-4	20	-21	23	-18	5	41
2548	-7	3	-7	-2	-7	-2	8	-13
2550	0	-4	0	-4	0	-4	13	0
2551	-1	-14	0	-20	2	26	42	18
2552	1	-2	3	1	-1	-2	0	-1
2553	1	-1	1	1	1	1	8	-2
2554	-2	-5	3	-5	3	0	0	19
2557	3	-10	13	0	-3	-10	-3	9
2558	-9	-6	-11	-10	-9	0	-6	-18
2559	9	6	4	5	-4	5	7	31
2560	3	-1	3	-1	3	-1	8	3
2561	5	-13	14	-4	3	-10	-2	5
2562	-29	-2	10	0	0	0	7	-47
2563	-2	-19	14	-19	-7	-19	-11	26
2564	-2	4	15	5	6	-1	20	4
2565	0	0	7	7	-2	2	6	-8
2568	-82	10	9	-77	-21	-75	9	-94
2571	-69	-62	11	-113	-2	-16	-13	9
2572	1	10	1	13	7	8	24	6
2573	11	-6	11	3	0	3	-7	13
2574	2	-5	-2	17	2	2	26	2
[truncated: 1,429 more rows]
