# Supplementary material for: Ssl2/TFIIH function in transcription start site scanning by RNA polymerase II in Saccharomyces cerevisiae
Source: eLife. 2021 Oct 15;10:e71013. doi: 10.7554/eLife.71013 (PMC8589449; doi:10.7554/eLife.71013)
Supplement: Figure 5—source data 4. [file elife-71013-fig5-data4.csv]

	ssl2 L225P	ssl2 N230D	ssl2 N230I	ssl2 D522V	ssl2 R636C	ssl2 Y750	rpb1 E1103G	rpb1 H1085Y
1	11	4	21	-9	3	9	9	-36
3	-20	67	-20	67	32	67	53	18
7	-1	-4	0	6	-3	-50	11	-5
12	-3	1	0	-3	0	4	2	0
16	-2	-1	2	-1	0	-4	-1	2
18	3	3	9	2	4	0	7	6
21	3	-18	1	-18	0	0	9	34
31	12	-6	10	-6	4	4	-4	13
35	-1	4	-3	13	-6	5	11	-22
40	7	0	11	3	4	22	38	15
41	0	3	0	3	0	3	10	-3
49	0	-5	0	-5	0	-15	-9	0
60	59	0	55	0	7	0	-5	55
81	-10	-20	3	-19	1	-15	-6	-31
83	14	-5	31	1	5	-1	8	12
87	-7	-6	-25	-2	-2	-36	8	10
95	-6	1	1	-6	-6	1	1	-22
101	17	-36	40	-36	16	-33	-30	42
104	-4	4	6	8	0	4	18	-4
108	0	-7	0	-3	0	-3	-10	1
109	-2	-15	-1	-15	0	-10	-8	-7
112	5	0	4	5	5	4	21	0
120	6	-6	20	-6	17	-3	-1	20
121	14	-23	45	-8	-2	-26	47	-9
131	0	-3	0	3	0	-7	52	-2
133	0	-1	0	1	0	-3	3	-90
134	0	-66	0	16	0	16	18	-32
137	0	-8	0	-8	0	-6	-8	-12
138	-14	12	-7	-77	12	-16	-42	-23
140	0	-9	0	-10	0	-10	2	0
141	2	-3	1	-3	1	-4	1	2
143	0	-4	0	-4	0	0	10	-9
148	0	4	0	4	3	1	4	-6
153	0	-8	162	142	-1	-9	-13	33
157	-1	5	-3	5	-3	5	6	-3
158	-17	-4	-14	-4	0	-4	-1	-8
161	4	21	4	14	5	10	23	11
173	8	-9	8	-4	8	-9	0	8
175	0	8	2	8	4	8	22	198
182	6	-17	8	-39	-7	-17	-35	0
189	-1	-32	4	-29	0	-32	-29	0
190	3	-17	4	-17	0	-16	-10	-3
191	-6	1	-6	1	-4	1	2	-6
193	-81	-77	-8	-70	-11	-78	0	-76
198	6	2	3	-3	6	-6	6	4
199	4	-9	0	-6	0	-11	-6	39
206	0	-2	0	0	0	3	6	0
208	32	-51	32	-28	24	-16	-28	25
211	0	-3	0	10	0	-3	7	-5
213	0	-7	0	0	0	0	6	0
214	3	0	7	0	7	0	211	215
219	-27	-2	1	-93	-8	-30	-3	-71
220	0	0	0	0	0	4	-13	12
222	2	16	-9	2	-9	-9	21	1
223	-3	15	0	7	0	12	21	0
229	0	-36	0	-28	0	-30	-1	-4
233	10	-7	7	-5	4	-10	10	-3
234	-4	19	-4	15	-2	22	61	-8
239	-53	25	26	-28	26	31	-14	-2
240	4	2	4	6	4	0	6	-8
244	0	7	18	-3	0	10	16	0
248	21	-10	-3	-6	0	-13	6	36
250	2	1	12	1	1	1	4	2
254	109	45	165	-6	3	7	244	161
256	3	4	3	4	3	4	4	-28
260	0	-8	7	0	0	-5	1	-19
262	-8	-80	-10	-58	-8	-73	-78	47
264	7	-10	-6	-2	-3	-18	-14	22
268	-11	6	-10	6	-4	0	6	-90
271	8	-9	17	-9	-8	-9	-5	2
280	-4	76	12	2	5	35	23	88
283	1	-4	14	-4	4	-4	1	1
287	2	0	55	0	10	0	6	23
289	-5	2	11	8	6	8	8	-8
292	-5	-7	-3	-7	0	1	0	-3
297	-1	-1	-1	-7	-9	-1	-4	-15
300	43	14	-3	53	50	62	65	-20
306	-29	7	4	9	4	-17	-37	8
309	0	-5	0	-4	0	-8	3	0
313	0	0	0	0	0	0	0	0
325	0	-15	23	-7	0	-7	-4	34
326	-10	-19	0	-19	-5	-18	0	-16
327	-11	2	-5	1	5	-9	0	-26
328	11	2	8	-4	11	-4	13	7
349	0	-7	0	-7	5	-7	-7	9
350	7	8	3	8	0	7	15	-7
352	4	19	2	24	27	18	25	4
353	0	0	-24	7	0	-1	11	7
362	9	-7	9	-6	3	-8	1	61
365	11	25	1	22	-1	25	8	8
371	-27	20	12	9	15	22	48	-5
376	15	15	15	15	5	5	5	24
385	-4	-4	-7	-4	16	-7	68	12
388	119	-10	116	-10	0	-12	-7	17
392	13	-11	22	2	7	-7	3	15
396	1	0	5	0	6	0	1	0
416	30	26	17	24	35	-39	37	-9
419	0	5	69	5	2	5	5	65
428	0	-5	0	-5	0	-3	2	4
430	-6	-69	38	-79	9	-88	-11	18
431	2	-14	15	-11	-2	-8	35	16
434	9	-7	15	-11	-3	-1	-7	-8
435	-12	-12	12	-12	-3	-12	-4	47
440	-9	-32	-9	-27	-9	-37	-21	-22
462	12	1	7	7	7	-2	3	11
468	-8	-10	-6	-41	3	-32	4	-56
474	0	0	24	0	23	0	8	0
477	-3	3	-104	1	-2	3	3	-70
478	-9	0	5	-11	3	-10	16	22
484	-5	-9	7	-8	-5	-7	-8	-12
489	3	-19	5	-10	4	-21	-9	4
493	2	-14	2	-14	2	2	-16	-1
503	1	-88	10	-87	0	-95	8	10
513	-12	0	0	0	-9	-15	8	-22
518	-6	-2	0	23	-27	3	-10	2
522	7	-9	4	-5	5	-5	2	2
533	8	-1	8	-1	18	-1	16	84
535	73	-3	81	-3	4	-3	10	16
538	17	-24	17	0	17	-27	6	15
559	-27	-28	0	-18	0	-67	-13	-11
562	0	-35	0	-11	0	0	5	0
568	-14	-5	1	-12	0	-14	-2	-14
569	9	-4	12	-6	6	-1	5	3
574	-4	6	2	6	-4	-20	-3	56
575	0	5	16	8	1	6	4	5
577	8	-16	10	38	-3	-10	-14	13
580	20	-6	26	30	-2	-8	-18	-25
582	6	19	0	1	27	3	53	-3
584	-6	3	6	2	-5	20	3	-5
586	-3	-12	52	-12	48	-12	45	61
587	2	-2	4	1	2	1	-4	0
591	9	-2	10	-2	-4	-6	0	-4
597	-4	-41	20	-40	1	-45	4	-43
598	15	-35	18	-32	0	-32	-36	15
599	0	-4	4	-4	0	-2	11	17
601	0	-9	-6	-9	-4	-9	-9	-6
607	13	-6	17	-6	20	-8	5	20
608	0	130	-21	118	86	52	140	137
610	20	5	19	5	4	5	10	27
611	-14	-20	-14	-20	0	-14	-3	-27
614	-29	-28	4	7	-39	-16	-31	-26
615	0	2	6	2	-1	1	11	8
619	5	10	5	10	5	10	10	2
628	0	-1	0	-3	0	-2	-3	0
629	10	-6	25	-6	-3	-4	-4	4
630	16	63	16	24	-2	-20	70	-34
632	6	103	7	-3	2	90	127	107
635	-1	3	-2	6	0	6	14	-2
636	-3	-5	0	-8	0	-8	-1	-2
637	8	-19	13	-19	4	-20	-15	3
640	6	-3	3	-3	1	-5	-2	-2
641	12	-5	20	-3	9	-3	1	-8
642	-3	-8	6	-3	0	-4	-4	6
643	12	9	8	9	8	9	9	-1
646	6	31	1	7	0	14	28	5
659	2	-45	4	-49	4	-16	-43	48
667	17	6	22	3	0	3	-2	17
675	-23	-46	7	5	10	-16	-26	32
677	0	0	0	0	0	0	0	0
683	23	-2	26	2	1	-4	-14	27
684	-2	-23	12	-23	9	-32	-13	65
685	0	-7	7	0	0	0	-1	-1
693	7	5	13	5	-5	2	19	7
694	-11	-27	-8	-20	-1	-29	3	-9
696	5	0	15	5	0	-5	17	5
700	-3	-11	14	146	-9	-2	-29	0
703	-9	1	-11	4	-11	4	4	-25
707	101	-22	167	-33	22	-39	66	39
709	4	-23	8	-11	8	-19	6	8
721	-90	-8	-87	2	0	-94	5	0
729	33	6	56	15	4	-12	16	18
738	4	0	4	4	4	-1	5	19
740	0	1	-1	1	0	1	1	84
745	-10	-16	-13	-6	-11	-6	0	33
746	0	8	0	0	0	2	17	0
747	58	21	50	-49	19	83	30	24
748	0	-20	1	-12	0	-10	-12	-7
749	-4	26	-4	-16	-4	-1	56	-3
754	-8	13	-10	18	-2	-7	12	-4
755	-3	5	-1	-3	6	1	5	5
763	35	3	19	1	0	32	14	24
771	30	30	34	30	19	5	26	28
775	10	2	18	-21	10	6	9	18
778	8	3	30	5	1	5	15	53
781	11	-27	21	-27	21	-19	-14	28
783	3	-6	3	0	6	-19	-2	-26
784	10	-25	11	10	4	-24	7	59
793	18	-8	22	-1	5	4	77	77
795	3	0	15	35	0	29	22	23
797	1	15	-3	2	0	17	22	7
805	5	-12	5	-8	5	-1	0	7
806	-15	9	-7	12	-7	1	29	-35
835	-1	3	-2	3	-1	0	9	-4
837	16	-54	20	-54	-1	-48	-48	20
846	13	10	-13	9	5	9	17	-62
847	10	-12	11	-14	0	-12	4	11
848	-6	-4	-6	2	-5	-4	0	1
855	8	3	6	-6	4	11	5	18
859	0	8	1	1	-2	8	20	-14
862	23	-10	25	-12	4	0	-6	21
864	22	28	60	28	10	28	37	70
865	-2	6	-3	5	-3	5	12	-3
866	5	-4	5	-11	9	-14	0	85
867	0	9	-7	9	-4	8	13	-16
876	47	4	41	10	1	8	10	38
879	-4	10	-10	2	-13	10	10	-16
881	8	-25	9	-25	0	-25	10	24
885	24	11	2	0	-6	9	19	2
905	9	11	9	14	-1	12	-102	-63
911	-11	35	-10	16	-11	29	35	-10
914	6	-21	11	-17	0	-21	-2	10
916	5	-2	30	-3	3	-7	29	3
919	21	-12	21	-9	15	-9	1	25
923	-11	5	-20	2	-1	0	24	28
929	3	1	1	2	0	5	3	-3
931	0	0	0	0	0	0	1	0
938	0	-5	0	-2	-7	-2	3	-9
943	-2	-16	-2	-10	3	-6	-7	0
947	-23	24	0	22	13	-5	30	0
952	3	7	3	-3	3	-2	21	-1
956	-8	-5	-16	-25	-6	-38	5	1
961	12	-9	-3	-18	12	12	-18	33
962	3	44	27	28	4	25	45	23
965	10	-1	27	-9	4	-9	0	-1
966	12	-27	27	-27	12	-27	-19	33
967	29	26	-4	38	0	26	44	10
972	5	-3	6	-3	13	-3	30	18
974	0	8	-5	0	-11	4	11	4
975	8	-16	8	-16	20	-5	-2	20
979	-13	19	43	-17	24	28	32	21
980	-6	-6	3	-8	0	-8	5	0
981	-10	4	2	-8	0	-13	9	-49
986	13	-16	13	-3	0	-50	-10	-36
988	43	-23	15	0	1	0	-17	0
989	4	21	-29	18	-1	5	29	-6
991	15	4	22	-4	9	4	4	21
1003	0	-12	-5	-6	0	-6	-3	-5
1005	0	7	10	9	5	2	4	6
1006	-1	-38	8	-42	3	-30	-1	3
1007	0	-2	-1	-2	3	0	5	6
1017	22	37	28	51	8	30	63	5
1024	-4	-10	-1	-8	-1	-7	5	6
1031	2	-3	6	1	2	-3	6	-9
1035	6	1	15	-10	9	-3	3	16
1040	139	59	172	149	0	-48	119	147
1043	11	-8	13	-8	10	-7	2	13
1046	8	-15	15	-25	15	-30	12	22
1053	6	-14	6	0	-6	6	-14	-1
1054	-9	33	18	70	0	28	38	30
1058	0	-2	0	-12	0	9	10	0
1064	-13	-1	-23	-25	-14	0	21	-21
1069	3	9	10	19	10	-59	-1	0
1075	-44	-12	-35	-4	2	-44	-8	2
1079	2	5	2	2	0	4	14	-3
1083	-3	-9	12	-8	10	-19	-6	4
1084	0	-14	4	-6	0	-14	-3	45
1085	15	0	15	2	-1	5	6	-24
1086	45	26	47	6	17	26	26	19
1090	7	-19	10	-19	4	-19	-19	10
1097	14	16	16	28	-13	-4	9	-1
1099	0	0	-3	5	0	0	-1	14
1100	15	12	-1	6	0	6	22	-5
1102	16	0	29	11	16	9	11	-19
1103	4	8	3	-2	-8	-2	38	22
1105	48	2	21	8	2	-9	10	1
1108	109	-62	81	184	-58	-64	-4	-6
1109	-9	21	7	8	-2	-4	41	-18
1111	6	-22	10	-18	6	-22	1	11
1112	-91	-99	-92	-99	50	-99	-100	-91
1120	0	1	0	0	0	-4	6	0
1128	2	-1	5	74	-9	2	9	1
1135	15	17	0	25	2	17	21	19
1144	-2	9	-2	8	-2	11	18	-2
1147	17	-5	17	-10	17	-5	10	-7
1155	6	-4	31	11	-8	10	-11	-9
1160	36	-3	63	7	-3	-3	9	-6
1164	2	10	16	10	16	0	15	28
1171	0	-22	19	-21	-2	-22	14	6
1173	0	-4	22	-10	-4	2	11	17
1199	4	5	15	0	0	0	5	3
1212	-3	6	-2	-2	-4	-2	21	-2
1218	9	-7	1	-4	0	4	1	-14
1219	2	-1	2	-1	0	4	3	10
1221	-7	-14	-7	-10	-4	-13	16	-6
1225	6	-1	0	8	6	1	19	11
1228	17	-15	7	-11	-7	-7	-25	-31
1229	7	-7	-1	-5	-5	-11	1	7
1242	3	-3	15	-5	-1	26	31	12
1243	-4	-17	-4	-14	2	-10	-8	9
1258	-23	1	-7	-12	-8	-17	-6	-15
1272	-2	-11	9	-11	-2	-1	13	-2
1275	2	-17	-3	-12	4	-12	-12	22
1281	0	-18	0	-18	0	-7	-7	9
1296	0	1	0	0	0	0	13	0
1299	0	-5	15	-4	0	-8	6	18
1306	1	0	36	0	1	-1	13	52
1312	-4	-27	-35	-29	14	-31	-19	-32
1313	-8	3	12	4	7	6	18	-27
1318	8	-12	8	-7	8	-10	-7	17
1320	15	-8	8	-8	6	-4	-14	43
1327	-7	-7	2	0	0	0	-3	2
1328	-2	0	-1	-5	-1	-5	8	3
1331	-19	-23	-9	-26	-19	-27	-1	-13
1334	209	205	209	210	2	205	203	205
1336	0	17	0	175	0	-29	177	-108
1338	0	-7	0	0	0	-1	10	86
1347	-2	17	7	-8	13	-4	24	-85
1350	6	7	8	3	4	0	8	-4
1362	1	8	2	8	-5	8	25	-12
1364	0	-16	2	-16	0	-16	-6	11
1371	62	3	62	49	-37	62	-1	37
1377	-7	11	26	13	9	2	16	5
1378	-7	-7	-8	-7	-3	-7	-3	-12
1383	0	-1	4	2	0	0	20	1
1400	0	15	0	16	0	16	16	0
1406	0	-22	0	-6	0	0	-19	0
1407	-2	-17	2	-21	-4	-16	-1	4
1410	35	-9	26	11	-11	-16	34	-15
1416	0	4	10	5	4	4	8	14
1424	5	8	5	6	1	7	9	-9
1425	0	2	0	7	0	9	16	1
1432	14	11	14	0	0	-29	13	-25
1433	1	-7	0	-2	2	0	10	147
1434	3	-109	1	-98	-1	-97	-15	3
1435	9	-28	3	-44	6	-37	-27	9
1438	2	1	5	-3	4	-3	26	6
1439	3	-6	17	-2	9	-6	5	69
1443	118	-4	4	-2	4	109	-6	189
1451	0	-12	0	-12	0	-12	-4	5
1458	7	1	15	21	-8	22	-15	0
1461	0	0	0	0	0	0	8	0
1470	5	-4	13	-1	5	1	2	-4
1474	7	-100	12	-76	-9	-90	-57	11
1477	-4	-7	0	2	0	0	-23	-2
1483	1	-18	1	-8	9	-8	-27	-12
1491	-2	16	2	21	-4	-3	25	-6
1494	4	4	4	-4	3	8	13	-1
1497	18	-57	0	-61	0	-48	-56	83
1498	-16	5	-16	-11	-11	-11	63	150
1500	0	0	-12	-3	-17	-3	0	-17
1501	0	24	24	24	23	24	24	30
1504	5	-8	10	-8	5	-8	-7	7
1505	-15	-10	11	1	8	-10	-9	-37
1507	5	-1	2	-1	5	-1	7	-3
1511	0	-8	4	-3	-3	-8	5	4
1512	5	-7	-4	-5	-5	0	-3	-14
1514	0	0	0	0	0	0	6	13
1524	9	10	0	10	-3	3	30	0
1525	11	-14	39	-8	0	5	6	52
1527	-8	-8	1	-8	0	-1	-7	4
1529	18	-10	7	51	-2	-20	-4	-12
1540	5	11	174	183	0	-6	-2	145
1555	18	-6	15	-2	0	-4	-3	-12
1560	4	-6	4	-2	1	-5	9	-3
1563	42	-5	42	-5	3	-5	-2	42
1565	2	14	4	13	-25	9	52	-5
1570	4	-15	4	-8	0	-8	-15	3
1573	-6	-2	-8	-1	0	4	4	24
1576	3	6	7	4	3	22	45	3
1577	20	-8	9	0	0	-10	-1	21
1597	0	5	-1	5	0	5	12	-6
1602	0	-9	0	0	0	0	-6	-29
1604	-8	-8	9	-22	5	-24	-41	19
1607	-3	2	3	-1	4	0	21	-3
1608	0	0	0	0	0	0	8	0
1609	7	-18	11	-8	-3	-13	-18	-11
1611	29	-3	48	-5	27	-3	-8	73
1612	28	-4	29	-4	27	-4	-17	22
1613	39	17	34	3	0	31	21	40
1618	-2	309	0	242	0	8	108	-58
1620	4	10	4	0	4	-2	14	-4
1622	-9	-6	-6	-7	0	-9	-3	-7
1624	-11	3	-16	3	-18	0	3	-26
1629	33	-18	15	27	10	-26	-27	13
1633	-1	10	0	1	-1	4	-3	-6
1641	1	-1	1	-1	0	-1	15	46
1644	-62	-7	-3	-11	0	-48	-11	-1
1645	23	0	26	-5	0	-6	10	39
1646	26	-10	29	-4	-4	2	-10	55
1648	1	-24	1	-22	-29	-22	8	-34
1652	-2	-44	7	-32	-2	-24	-22	-18
1659	0	0	0	0	0	0	10	0
1660	9	-19	6	-16	6	0	-42	3
1663	-9	19	-14	8	-17	12	23	30
1673	-2	-5	3	-8	-2	-10	1	-3
1683	8	7	8	-14	1	2	9	17
1693	2	10	19	-34	3	11	25	25
1698	1	10	6	10	-8	10	10	-18
1700	67	-21	15	-39	3	-43	-19	51
1704	20	-16	20	28	12	9	10	12
1716	17	8	24	6	9	6	11	-47
1720	-11	11	-9	5	-12	3	23	-12
1724	29	-1	21	-1	9	31	14	25
1725	9	-14	61	-13	3	-8	-13	10
1727	89	3	86	4	23	4	18	92
1728	12	-8	20	-5	5	-25	-5	-2
1735	10	-8	11	-8	7	-8	25	5
1737	28	1	32	11	9	35	9	32
1746	0	-9	-5	-9	0	-5	-5	-29
1749	-3	-23	-6	-11	-5	-14	-12	-11
1750	3	1	0	0	0	1	7	-7
1751	18	-17	54	-13	11	-26	-42	75
1755	5	45	7	0	9	14	53	1
1757	14	-4	13	-4	15	-4	-4	7
1761	1	-4	-2	-3	-4	-3	15	5
1765	0	-9	0	-9	2	-9	15	6
1772	13	36	34	51	9	2	52	8
1773	8	-17	8	-17	8	-6	-3	0
1790	12	-3	0	-5	0	6	3	206
1792	0	-2	0	-2	-11	0	0	-75
1798	-5	4	-10	-30	-13	-36	4	-23
1808	9	0	-1	-3	-10	20	-7	42
1810	6	0	-4	-8	-11	-13	-3	-4
1816	0	16	-8	11	-3	-13	34	-8
1823	30	10	16	6	7	-5	16	39
1827	32	0	35	-2	30	0	19	-13
1829	0	-9	0	0	0	-6	-2	-1
1832	2	14	3	4	0	3	21	29
1841	0	-13	0	-8	-8	3	5	-9
1842	2	-14	2	-14	2	-7	3	-1
1851	0	6	0	1	0	6	8	0
1854	20	18	0	0	18	13	18	20
1855	5	-3	5	-2	5	-3	2	14
1857	0	2	-1	2	0	0	5	-1
1858	9	-29	14	-19	6	-10	-25	8
1878	0	-4	0	-4	0	0	10	-3
1879	19	-152	14	-152	19	-149	-126	-84
1887	-15	-13	6	-9	-1	-14	4	6
1888	2	-2	-1	-2	3	-6	1	-1
1894	19	-5	-7	71	13	8	-3	4
1895	-7	-8	-5	-5	0	0	-6	-10
1897	0	7	5	4	-3	3	7	-4
1903	8	3	39	3	8	8	3	24
1911	-32	-34	1	-8	0	-27	-28	18
1912	-3	15	4	-4	4	3	3	-5
1913	0	-2	0	0	0	0	-5	11
1914	-9	-91	-4	-94	-12	-94	-82	1
1915	-1	0	0	0	-2	1	-4	-27
1916	14	-6	14	-2	-2	-2	6	15
1917	3	16	5	16	3	16	16	-20
1932	0	0	1	0	0	0	-3	1
1933	4	3	5	-6	2	4	5	5
1950	0	0	6	0	0	-3	7	14
1962	1	4	-8	-1	0	3	19	-1
1963	35	-2	42	34	-1	53	-4	-3
1965	4	-9	1	-6	3	-9	-4	10
1977	0	-2	0	-1	0	-2	6	2
1981	40	-14	44	0	5	-6	-6	18
1990	-3	5	-1	6	-2	0	5	-5
1995	20	8	27	12	11	15	20	6
2002	-5	-18	-1	0	3	2	-21	-2
2011	10	3	2	0	0	8	11	-23
2021	9	3	4	-9	-7	-9	-11	-4
2026	0	0	25	0	0	0	0	16
2029	-19	12	0	-2	0	4	12	7
2030	-38	-3	-3	-21	-18	-41	-7	-42
2031	-11	-9	-22	-54	0	-56	-7	12
2041	2	12	15	5	15	5	17	15
2050	-3	3	-3	-8	-3	-7	20	-8
2060	4	-8	4	-8	4	-10	-4	-4
2061	0	1	15	3	5	4	1	6
2063	-3	30	-8	17	-8	2	40	-8
2068	0	-3	0	-3	0	-3	12	0
2069	11	-9	15	0	11	-4	-5	25
2073	7	-3	11	-3	0	-3	1	-14
2077	4	-6	4	-2	0	4	-10	2
2081	4	-22	4	-23	2	-18	3	-4
2084	11	-4	10	-1	10	-4	5	0
2089	-30	-33	-31	21	-22	5	21	-61
2092	-4	-3	0	4	0	0	10	-20
2093	0	0	-3	2	0	0	46	-4
2094	4	-9	48	-6	39	-6	-3	45
2095	-2	0	0	4	-7	-8	13	-19
2106	11	-14	13	-18	2	-4	-4	2
2110	200	44	56	150	-12	144	59	31
2112	2	1	4	7	2	33	-5	-6
2113	0	-3	1	-3	3	-3	5	6
2117	-6	-31	-4	-31	3	-25	-31	2
2125	0	-4	-2	-4	0	5	3	4
2149	0	9	0	9	0	0	13	0
2159	2	2	-12	5	1	2	12	-16
2163	4	-2	2	38	32	-2	108	-5
2177	-45	-73	56	-66	2	-82	-39	16
2187	0	0	0	0	0	0	10	0
2188	-21	-7	-115	0	0	-21	7	50
2190	-5	5	-1	-5	-3	-2	1	4
2196	0	-14	1	-11	0	0	-3	6
2199	-3	-22	-9	-8	1	-11	-17	-3
2201	12	14	10	15	7	20	18	-8
2210	0	-8	6	-8	2	-10	-6	-97
2213	-27	-21	-5	-9	-4	-15	-20	-40
2215	-7	-8	-20	-8	-16	-6	-12	-26
2234	-11	6	3	2	-1	7	-4	-2
2253	27	23	0	23	-7	27	34	6
2254	-1	-4	1	-4	3	-4	4	0
2258	5	-10	14	-6	0	1	-3	0
2259	-2	11	0	8	1	0	14	1
2264	-11	68	-34	48	19	27	84	-2
2270	0	0	1	0	5	0	1	53
2273	-2	1	-2	-5	3	1	1	6
2274	-5	5	-5	5	-5	5	5	-5
2281	1	7	3	4	0	0	8	3
2292	0	-5	4	1	1	-10	-5	-7
2297	67	-68	23	-67	0	-65	73	7
2307	6	6	-6	9	6	-25	19	30
2315	25	-8	72	22	-6	-6	-5	70
2316	-11	13	115	-14	77	-20	88	8
2319	15	-44	42	-31	1	-41	-45	56
2322	5	0	-9	0	-11	6	4	0
2337	142	6	0	8	0	8	13	8
2341	-8	-7	1	-7	-7	-8	-7	-1
2345	8	-7	16	-7	5	-11	-2	27
2346	0	-3	0	-3	2	-3	3	5
2348	-4	-1	-2	-3	-3	2	2	-20
2351	0	-9	16	1	19	-13	-12	28
2360	8	-7	63	-9	5	-8	1	64
2362	0	-14	6	-12	6	-17	-12	0
2371	16	-6	23	2	23	-6	32	16
2376	0	-12	0	-11	0	0	-15	0
2380	5	-1	15	-1	0	-4	7	41
2383	7	-31	34	-23	0	-33	-31	37
2385	3	2	0	2	1	2	3	-3
2387	9	1	9	1	9	-8	0	2
2391	3	-10	9	-10	3	-6	-4	19
2392	2	-9	3	-1	-1	-1	8	11
2397	6	-1	12	-4	-5	-6	-3	-5
2400	-3	-7	-3	-7	0	-5	3	-36
2403	4	1	4	2	3	0	2	-3
2406	7	1	10	2	-4	-1	8	4
2408	0	-8	0	-8	7	-8	-4	-7
2410	0	-14	2	-17	0	-10	-9	-14
2415	0	-2	2	-2	2	0	18	-2
2420	0	6	0	12	0	9	12	2
2422	54	-8	56	4	3	-12	-7	52
2424	-3	2	32	2	-3	-27	-9	6
2431	6	-18	-4	0	-4	0	6	8
2435	0	-7	4	-4	0	0	12	3
2437	27	22	39	22	5	22	22	-24
2441	13	-9	15	-5	13	-32	-5	15
2452	-6	-25	-6	-25	-3	-17	-7	-10
2457	9	-4	4	-4	5	1	0	-16
2462	9	0	-16	32	-3	-5	31	-45
2468	-48	9	6	-2	15	5	18	13
2470	6	1	6	10	-4	0	-7	-27
2477	-86	-15	-16	-13	-11	-14	-72	-51
2485	8	30	7	28	4	30	30	1
2487	-1	-32	14	-12	-2	-10	5	7
2497	0	0	0	0	7	0	0	1
2505	7	-23	7	-23	0	-23	-16	-31
2510	12	6	41	2	0	8	3	3
2511	21	6	6	6	3	-52	8	-52
2515	5	10	3	10	5	9	24	0
2521	19	-10	15	0	15	-7	10	-15
2525	25	-5	7	8	-9	7	-3	-25
2528	22	21	4	30	-4	12	-8	4
2529	-79	-76	3	4	-75	-80	-76	-135
2532	-1	0	-1	1	-1	-5	8	-1
2540	0	0	8	0	0	0	8	35
2542	0	0	0	0	0	0	14	-13
2549	9	2	2	-25	3	-1	14	5
2555	0	1	-4	1	-4	1	5	-12
2556	0	-9	0	-3	0	0	5	0
2566	0	-22	3	-15	-7	-12	-6	-14
2567	-2	-6	-3	-5	-1	-15	-21	-6
2569	0	2	16	2	0	0	10	0
2570	0	9	0	9	0	8	17	0
2591	0	0	0	-9	0	0	24	0
2601	4	-8	65	-8	-5	0	1	27
2602	0	-48	4	-72	0	-14	-5	26
2604	0	0	0	0	0	0	2	-4
2605	3	4	3	4	3	8	11	3
2606	26	-23	27	-85	9	16	4	21
2607	0	-12	0	-8	0	-2	200	-7
2610	2	-6	111	-5	5	-5	-4	86
2617	0	0	0	0	0	0	12	0
2618	-4	-7	-4	-6	-4	-7	-7	0
2626	18	-1	16	-8	18	-1	17	17
2628	-3	-4	1	-4	1	-4	-4	6
2633	3	-33	3	-33	0	-11	-32	13
2643	0	0	0	0	-2	0	4	-3
2645	26	-23	34	-23	14	-23	-14	29
2646	5	8	-2	8	-2	8	-3	-2
2650	0	6	0	0	0	0	7	0
2667	15	-9	15	-8	-1	-11	-8	-12
2671	0	-4	3	-5	3	-5	-3	3
2672	7	2	7	-1	15	0	7	15
2679	0	-20	0	-3	0	0	-1	-3
2682	18	56	-20	-3	-3	-10	-3	-20
2693	5	16	5	16	3	15	14	5
2700	-7	-12	-12	-10	-8	-12	-3	-7
2701	-4	-12	0	-9	0	-6	-14	-2
2711	0	0	0	0	0	0	6	0
2715	0	-13	5	-13	1	-13	4	50
2717	6	-11	2	2	10	9	-9	-14
2724	-15	6	-11	6	-2	0	1	-35
2742	-2	-45	29	-3	0	-15	-21	-16
2752	0	-25	2	-25	0	-25	-25	-7
2758	0	-2	0	-3	3	-1	3	26
2766	14	-10	17	-10	14	-12	9	22
2774	4	-38	7	-38	0	-39	-20	145
2775	18	-9	18	-9	9	-6	-9	11
2776	-3	7	-1	2	0	9	26	-1
2784	0	5	-6	5	0	5	9	17
2790	4	0	3	4	2	0	9	15
2798	-20	42	14	-6	6	-4	39	78
2800	16	-30	162	-30	0	-36	0	138
2802	0	3	0	3	0	7	13	15
2804	3	-4	10	-6	10	-6	3	3
2807	-3	1	13	-7	-2	0	6	1
2812	0	-1	31	0	15	-4	2	26
2817	15	-19	15	9	5	-19	-19	3
2818	66	-8	20	4	4	41	-5	66
2821	8	-29	5	2	3	-29	-6	-30
2823	6	-14	6	-98	3	-99	-4	-4
2829	1	4	4	18	0	-12	7	-2
2832	7	-13	-1	-11	11	-11	-5	-9
2833	-1	-3	7	1	3	7	4	2
2834	-11	74	-19	0	0	50	-7	39
2835	1	-3	-3	2	7	-3	-1	-1
2839	2	14	2	14	2	14	14	-12
2840	0	-7	4	-5	-2	-7	5	4
2843	15	-11	11	-18	-9	-18	3	22
2848	-59	10	3	27	9	-86	9	-140
2860	-1	-1	0	-1	0	0	0	13
2865	9	4	9	4	4	1	-4	3
2867	13	15	8	15	8	14	23	-7
2870	3	-10	3	-11	3	-4	-4	-1
2873	8	9	5	7	12	20	20	2
2880	21	-11	21	-11	14	-11	-3	25
2881	0	-2	5	-3	0	2	1	-9
2893	28	-31	74	-13	37	-30	-33	109
2894	-12	-2	34	-2	-12	-28	32	32
2895	39	40	39	39	0	39	46	32
2897	10	-1	10	-1	0	-3	1	1
2898	12	-15	36	-18	3	-15	-5	30
2900	3	-3	6	-1	6	-1	10	-1
2905	-128	15	-110	-21	2	-120	-12	-86
2910	15	-21	14	-21	8	-21	5	19
2917	-4	-5	-7	-5	-4	0	1	0
2919	1	15	0	24	-7	1	20	-8
2923	1	2	7	5	0	2	4	1
2927	0	5	0	5	0	5	5	-3
2933	6	-15	6	-17	0	-14	5	-7
2938	8	-37	8	-37	0	0	-12	21
2942	32	-11	56	-8	32	0	-20	60
2950	4	-13	4	-10	0	1	-6	-5
2951	5	8	5	12	0	0	7	27
2953	21	26	25	26	-3	26	36	4
2964	0	-8	0	0	0	0	-9	-6
2969	9	210	112	218	6	-3	24	3
2975	-5	-14	2	0	4	-5	-21	-25
2978	2	-10	4	-10	3	-10	-2	8
2979	9	-18	8	-14	1	-14	-14	12
2981	4	-9	4	-7	-1	-8	18	18
2985	-3	-5	-3	-8	-3	-5	-3	1
2992	0	0	10	0	0	0	-35	13
2998	0	-2	0	-2	0	-2	0	0
3000	0	-4	0	2	2	0	0	-76
3007	21	31	26	36	21	12	40	18
3015	-15	-4	-13	-4	-9	-4	4	-41
3020	3	4	3	4	-1	-6	4	5
3025	-3	-12	4	-11	4	-12	-3	0
3031	4	-7	12	-5	15	-7	-3	17
3035	-1	-7	-2	-4	-1	-9	2	-3
3041	4	-2	8	1	0	4	7	-1
3043	6	-9	12	-9	5	2	-9	-8
3047	7	-3	2	-3	0	-3	-3	-19
3049	13	11	9	6	0	5	13	9
3054	7	-6	-2	-20	-4	13	-5	-6
3066	9	-8	7	-4	-2	-4	-3	-2
3074	16	-9	0	-3	-11	-8	-3	-3
3077	-2	0	4	4	-4	-1	2	-6
3080	7	-11	7	-26	0	-32	9	7
3085	4	7	6	-1	6	10	26	-13
3088	-114	1	11	-128	15	-16	23	-83
3094	-5	46	-5	35	-5	14	118	54
3095	0	25	-16	25	-19	30	30	23
3098	24	-4	38	0	24	-20	104	168
3102	5	-6	5	2	5	0	11	5
3105	4	-10	8	-10	0	-10	-4	0
3106	9	-12	9	-12	0	-4	9	9
3118	-8	-1	0	1	-8	-8	-3	0
3120	48	46	48	36	19	18	79	8
3122	73	-19	73	-14	69	-14	-13	49
3127	11	-27	12	-30	0	-16	-11	30
3132	0	10	8	-3	8	0	16	5
3142	0	-8	1	-10	-4	-1	-5	11
3144	0	-19	1	3	-9	0	8	-10
3146	7	1	12	12	3	-11	11	12
3147	-4	-49	-4	-38	-4	-12	-49	-4
3149	52	4	52	49	-25	0	17	51
3153	-33	-3	-30	-8	-5	-7	10	-75
3157	-2	-1	6	-1	0	4	5	0
3158	-5	-1	-5	3	0	-6	18	9
3159	-29	-2	-30	9	-3	-36	-6	-19
3164	39	0	58	58	13	-1	45	53
3165	26	3	2	4	2	3	5	21
3166	-1	44	52	-23	50	-24	50	1
3167	12	-2	12	-7	12	3	11	-7
3169	61	0	61	0	-4	-4	0	280
3175	-2	2	3	1	3	1	2	3
3184	-10	-9	0	-7	0	-15	-5	-3
3198	0	8	7	8	0	3	9	0
3199	31	-10	0	-10	13	-15	-8	-5
3202	0	2	0	-7	6	-9	20	0
3203	-8	17	-5	38	-7	28	7	-7
3204	2	57	25	58	8	92	95	5
3205	-3	-4	-3	-4	-1	-4	2	24
3211	0	0	0	0	4	-5	14	9
3212	-20	0	-20	-15	-10	-22	-1	9
3220	-41	-4	-15	-6	-14	-51	-2	-81
3225	-4	1	-2	5	3	-1	5	-4
3229	10	-6	13	-6	7	-6	0	8
3232	6	-23	19	-18	13	-17	-8	18
3235	-30	2	16	29	2	0	-1	-27
3240	4	-12	2	2	2	-15	-33	-10
3245	2	-34	2	-9	2	-7	-34	-3
3247	4	8	12	-2	0	-2	115	14
3250	-7	11	-5	-12	-14	-4	86	-15
3251	0	-5	0	-5	0	-7	0	21
3259	12	-2	23	2	0	-2	2	-6
3261	3	11	1	1	3	10	13	48
3267	0	-5	4	0	-5	-4	6	2
3284	0	9	0	8	0	8	24	10
3292	2	6	4	6	0	3	12	4
3293	63	-36	29	-32	15	-33	24	11
3298	25	0	12	0	1	3	8	25
3333	16	-9	16	-9	4	-6	0	215
3339	4	5	4	-26	7	0	7	-3
3342	19	-5	21	-3	1	0	-3	67
3347	45	46	45	46	3	40	44	-12
3348	45	46	45	46	3	40	44	-12
3357	1	8	10	8	7	8	36	7
3358	-1	-9	3	-9	0	-4	-7	-1
3367	-6	-23	-10	-5	0	-6	-5	-43
3378	0	9	-20	33	-20	17	31	-33
3380	-8	-14	0	-14	0	-8	-15	0
3388	-16	-6	8	-3	6	-7	-15	-16
3389	-16	-6	8	-3	6	-7	-15	-16
3394	-19	6	-7	6	-11	2	13	-10
3403	-14	-17	-9	-17	14	-16	-17	23
3406	2	-6	5	2	0	-2	-8	14
3413	-3	-15	-3	-17	3	-14	-5	-3
3414	22	-14	17	-14	10	23	1	17
3416	0	-9	0	0	0	-3	-2	-7
3422	-11	0	-7	0	-7	0	4	-6
3429	-3	-9	-3	0	-3	-9	-8	-11
3430	-19	16	-74	28	16	13	-56	-50
3432	4	-8	4	-8	5	-8	-4	4
3433	0	-26	2	-15	1	-15	-22	-2
3434	-3	2	-4	2	0	0	2	-31
3440	-19	20	-10	-18	0	-18	14	-10
3442	3	-1	27	-3	9	-7	-7	18
3447	-3	-3	13	-3	0	-4	-2	6
3449	26	17	-6	-45	-17	17	-46	-21
3460	3	-3	10	-3	10	-3	38	-5
3465	10	-22	6	-20	6	-19	-13	44
3466	38	-5	38	3	-3	-17	9	14
3485	-22	-8	2	-24	0	-8	-14	148
3489	3	-9	23	-3	-27	19	23	25
3490	18	-6	14	-6	3	-6	-6	2
3493	5	23	8	84	5	58	12	6
3494	-9	0	-5	0	0	4	8	-23
3495	0	-6	5	-8	-2	0	-11	11
3498	4	4	4	6	-1	5	13	4
3506	0	-7	1	-9	0	0	-10	8
3507	7	-3	15	-2	8	-11	-4	-32
3514	-8	-27	7	-11	0	-27	-2	-12
3516	0	-30	0	-16	-5	-6	-28	-23
3518	0	14	5	13	0	14	14	-10
3521	55	25	55	1	43	22	25	52
3530	21	-22	37	-2	9	-7	10	108
3532	128	-3	150	0	22	-6	-3	188
3533	-2	0	-2	10	1	10	10	-2
3541	16	-4	24	-3	7	-4	10	4
3544	8	7	16	6	11	1	7	25
3559	-19	6	-28	6	-11	-3	-11	-38
3561	-4	-2	23	-2	23	0	0	61
3563	3	5	7	13	3	-4	35	-3
3568	-1	-1	29	-4	-2	0	0	36
3570	0	-3	0	-4	0	0	3	-4
3577	24	-93	10	-73	-2	-46	-37	1
3583	16	-4	1	-3	5	-3	-3	20
3589	9	-2	12	-10	12	-1	-1	6
3593	2	-1	8	0	2	0	1	8
3595	-22	7	-27	7	-26	-10	7	23
3601	17	-19	15	21	-20	19	-16	0
3602	4	-4	9	-4	11	-4	-3	11
3603	8	3	22	-1	8	3	13	13
3606	90	-27	31	-22	14	-22	-18	84
3609	15	-16	45	0	9	-8	-8	-9
3612	25	0	25	0	15	0	1	24
3615	21	2	5	0	1	0	-18	18
3618	-27	-4	-27	-3	-10	-3	-3	-40
3621	4	-9	4	-9	8	-3	-7	30
3622	3	13	6	23	3	8	9	12
3623	11	15	28	3	10	24	5	3
3631	-2	5	10	5	2	0	0	28
3636	0	0	0	0	1	0	10	0
3639	49	-13	-12	-2	0	0	-8	57
3655	81	3	43	7	10	16	23	73
3661	-28	12	-24	-28	-24	-82	21	-2
3676	31	-7	34	-7	9	-2	-2	33
3682	0	-3	-2	4	0	-9	12	43
3683	-6	-6	-6	-21	-5	-16	0	-1
3685	0	4	5	-13	0	10	15	37
3689	7	-13	7	-13	7	-13	-6	30
3690	7	-18	5	-11	2	-11	-14	37
3694	-17	-7	0	-3	0	-8	7	0
3716	17	17	24	0	4	14	12	-43
3717	13	-25	13	-26	0	-25	-19	11
3719	-11	-11	6	-8	2	-11	-18	-45
3721	4	3	26	31	4	-6	73	-33
3723	7	-9	0	-9	3	-5	-8	0
3726	0	-7	4	-7	-3	-7	6	-6
3728	0	11	2	4	0	14	3	-8
3738	0	-1	1	6	0	7	5	3
3742	9	0	10	0	3	0	0	-4
3745	8	-2	11	-2	0	-2	-1	22
3749	-18	-10	5	8	5	5	-12	-35
3750	-71	-17	-36	-15	3	-76	-1	18
3752	5	-5	10	-5	5	5	-59	10
3776	8	-11	0	-6	0	-11	-6	7
3777	11	8	5	8	6	6	7	11
3788	0	3	3	3	0	0	4	3
3789	12	-11	3	-18	0	-11	-11	82
3790	3	0	9	0	9	0	5	9
3795	13	24	18	12	-7	12	35	-17
3796	31	37	29	36	-15	29	45	27
3797	21	21	0	0	0	21	27	0
3802	-11	7	-10	7	0	-2	10	-12
3811	0	-13	2	-8	0	-3	11	1
3829	-173	7	-162	8	0	-3	8	1
3837	4	-24	4	-20	4	-20	-16	4
3840	4	1	9	1	1	0	2	17
3847	9	-124	2	-68	-2	-64	-58	6
3849	5	4	6	4	5	-1	10	6
3861	50	54	61	51	30	2	42	-31
3865	14	-18	27	-6	2	-6	-10	10
3867	-9	1	-2	2	3	0	3	3
3871	14	-1	14	-1	14	-1	5	16
3874	3	-6	49	-14	1	-1	-15	2
3876	17	-53	7	-47	0	-52	-55	-3
3884	5	-6	15	-7	1	-9	-4	-8
3896	8	-14	18	-14	11	-14	118	57
3901	-40	-42	21	-31	-35	-40	12	-39
3903	2	10	12	11	9	12	93	121
3904	-26	-33	-23	-30	15	-33	-28	-33
3907	1	6	0	7	0	0	14	0
3908	0	6	0	3	0	1	14	0
3924	10	-15	13	-14	-5	-5	0	2
3927	9	-6	19	-6	8	0	0	5
3942	-3	2	21	-6	5	6	-41	32
3946	-2	6	-3	6	0	0	2	-9
3949	6	183	9	96	8	6	220	3
3958	10	-6	106	-6	-1	-4	8	107
3965	8	11	27	20	25	5	29	11
3969	-1	-3	-1	-2	7	-3	-3	-1
3970	8	-14	8	-10	3	-14	3	21
3976	130	-57	140	-61	2	-61	-48	-34
3977	5	9	9	10	0	16	-3	-136
3979	0	-10	10	-6	0	-6	2	23
3980	21	24	1	10	4	7	24	39
3984	14	17	15	17	6	-1	21	-3
3985	4	-5	7	1	4	0	6	16
3986	57	-2	8	0	3	-35	-33	12
3988	4	-8	3	0	3	3	3	144
3991	51	-1	51	29	5	0	-1	89
3996	5	1	5	1	5	1	8	10
3999	-1	3	-1	3	-1	0	15	-6
4008	1	-13	11	-20	0	-13	-2	10
4009	0	-3	4	-1	0	-4	7	-1
4012	4	8	4	7	3	0	9	0
4017	3	-4	3	-4	3	-1	6	0
4022	10	-3	36	-8	17	-11	0	1
4023	0	-1	4	-1	0	-1	-1	4
4024	0	-4	0	0	0	0	19	-8
4050	6	27	10	22	13	0	36	-64
4051	0	-1	-8	1	-9	3	-5	16
4054	0	-10	0	0	0	-13	-25	-13
4056	8	-15	13	-15	0	-13	-14	23
4059	0	-11	8	-10	-1	-11	-7	6
4060	25	-10	49	-32	14	-11	-10	23
4063	0	-4	0	-8	-9	-8	-1	5
4067	4	1	14	-8	8	1	1	13
4071	45	-10	93	-10	-3	-10	-4	61
4074	12	5	4	5	1	7	15	18
4075	0	0	-138	-7	2	3	-7	-34
4077	7	-5	7	-9	11	-9	-5	7
4082	24	-48	14	-48	17	-48	-48	4
4084	2	2	12	-9	0	-4	-1	42
4086	6	-1	13	-3	8	-14	9	-17
4087	46	-12	70	21	0	-24	-17	43
4088	4	-8	9	-2	4	1	14	4
4098	10	-35	42	-33	25	0	12	-48
4099	-4	0	-4	0	-3	0	0	-8
4100	0	-2	0	3	0	3	11	0
4105	-15	-7	-2	-29	7	6	10	67
4106	-9	-16	-5	-16	0	0	-3	6
4117	-9	-6	9	-6	-1	-6	-6	17
4118	-2	-22	3	-22	-1	-14	3	1
4121	26	-38	21	-32	12	-23	-9	7
4122	10	24	-6	10	12	22	47	27
4124	12	0	12	4	8	0	-9	2
4126	3	-27	8	-16	0	-5	-12	30
4132	-4	-79	8	-81	13	-64	-83	-72
4138	25	-6	36	-6	30	-2	-4	44
4141	-1	-2	4	-2	4	-6	16	33
4143	0	8	0	9	0	7	14	3
4146	-29	60	-6	63	7	2	75	88
4148	4	2	6	2	6	2	7	14
4150	-28	12	9	-3	-13	12	13	-31
4167	5	-12	9	-5	5	-5	-5	-10
4168	10	6	14	46	-8	7	-11	-4
4172	11	5	3	-3	3	-3	216	117
4178	5	-4	5	-5	5	-5	6	5
4185	3	-3	8	-3	8	0	0	0
4187	0	-42	0	-42	0	-27	-20	0
4195	10	6	-10	10	4	11	-2	-13
4211	-7	-4	-1	-3	-5	0	6	-7
4219	-4	0	-5	0	-4	4	21	-6
4222	0	7	0	3	0	0	11	0
4229	-8	5	0	9	8	-9	13	20
4236	4	-6	2	5	-1	-1	5	-14
4240	48	42	32	56	0	56	29	-31
4246	-22	-7	-21	0	0	-2	4	-45
4249	-1	8	-1	5	2	8	11	-3
4258	1	-13	-20	-16	-3	9	-8	-3
4263	-2	-2	-3	0	-1	-2	18	-3
4273	0	-7	3	-8	-4	-6	11	0
4279	34	5	16	2	-4	9	14	6
4281	-4	4	4	5	2	9	4	-4
4283	12	3	14	12	12	0	-31	12
4284	-24	-7	-24	-16	0	0	-8	-140
4290	0	4	6	4	-4	0	14	6
4292	33	0	49	2	6	-3	4	48
4293	0	6	7	-21	19	6	6	15
4299	15	11	26	1	13	13	24	18
4302	-1	7	-1	2	-1	2	8	-1
4304	27	30	-35	33	-24	-44	-44	-24
4305	1	-3	1	1	1	1	5	-1
4306	13	6	16	5	16	-11	-7	10
4308	-2	16	-2	10	-5	0	0	-13
4316	1	18	35	22	1	10	49	67
4319	0	2	3	2	0	2	12	3
4335	-3	2	-3	0	-7	0	3	-9
4356	0	-13	5	-16	5	-3	-5	2
4384	2	7	5	0	4	0	6	15
4389	1	-5	9	-1	25	-4	-15	-8
