# Supplementary material for: Ssl2/TFIIH function in transcription start site scanning by RNA polymerase II in Saccharomyces cerevisiae
Source: eLife. 2021 Oct 15;10:e71013. doi: 10.7554/eLife.71013 (PMC8589449; doi:10.7554/eLife.71013)
Supplement: Figure 6—figure supplement 3—source data 1. [file elife-71013-fig6-figsupp3-data1.csv]

rpb1 single mutants
	L1101S			G1097D			H1085Y			F1086S			H1085Q			F1084I			E1103G			N1082S
	Mean	SD		Mean	SD		Mean	SD		Mean	SD		Mean	SD		Mean	SD		Mean	SD		Mean	SD
Bin 1	0.015324623	0.006277927		0.063716143	0.005851611		-0.015573032	0.013663697		-0.025013022	0.005595741		0.000359189	0.00363647		0.002099927	0.001766976		0.03477206	0.002559394		0.00164696	0.003990627
Bin 2	0.259843561	0.027579059		0.483582278	0.047673412		-0.02814597	0.005906744		-0.025640218	0.010253815		-0.01223425	0.003007862		0.070357473	0.002150443		0.315413667	0.005127775		-0.014634418	0.001519811
Bin 3	0.00076932	0.015940302		-0.197911498	0.027342117		-0.186356666	0.081199251		-0.091870351	0.021334459		-0.076250191	0.007532941		0.089358856	0.012917597		-0.076478754	0.013999483		-0.118317634	0.020697738
Bin 4	-0.004293328	0.009596311		-0.018816602	0.006551896		-0.007281377	0.010452327		-0.008436078	0.006548523		-0.003213285	0.000442915		-0.003754736	0.000607324		-0.005341835	0.001075928		0.000120851	0.00369705
Bin 5	-0.237942525	0.016560426		-0.291472297	0.036757976		0.201650381	0.070958065		0.146519011	0.013835644		0.074884307	0.013622772		-0.140859733	0.017488806		-0.247441109	0.011953279		0.11272047	0.02679208
Bin 6	-0.033701652	0.011779942		-0.039098024	0.010027903		0.035706663	0.027332953		0.004440657	0.005408057		0.01645423	0.001954049		-0.017201787	0.001303497		-0.020924029	0.002701993		0.01846377	0.001731182
ssl2 N230D
	N230D
	Mean	SD
Bin 1	-0.008392755	0.005620689
Bin 2	0.035453355	0.005802327
Bin 3	0.209765561	0.01243404
Bin 4	-0.018220244	0.008830696
Bin 5	-0.171000974	0.019397436
Bin 6	-0.047604944	0.007263023
rpb1 N230D doubles
	L1101S			G1097D			H1085Y			F1086S			H1085Q			F1084I			E1103G			N1082S
	Mean	SD		Mean	SD		Mean	SD		Mean	SD		Mean	SD		Mean	SD		Mean	SD		Mean	SD
Bin 1	-0.006320637	0.004360346		-0.014599346	0.007521519		-0.061692119	0.012358121		-0.039811014	0.007477636		0.002929089	0.00531858		0.006720777	0.002880739		0.039247882	0.00616106		0.009165432	0.00652819
Bin 2	0.407056342	0.034681007		0.175443777	0.016766175		0.006884166	0.035339155		0.008489451	0.025735098		0.013620021	0.003281976		0.136710811	0.008968765		0.398620494	0.009209272		0.013821606	0.000635819
Bin 3	0.009437535	0.02540972		0.18393488	0.029846697		0.092532263	0.034788223		0.144534254	0.036165419		0.084653041	0.011593251		0.144615909	0.009827672		-0.108343048	0.013932182		0.06445926	0.021333825
Bin 4	-0.031752346	0.014663505		-0.020811126	0.011584336		-0.006880086	0.00759769		-0.012153791	0.016165725		-0.006633726	0.004523776		-0.015782429	0.002144758		-0.019781593	0.001159813		-0.005069914	0.004717462
Bin 5	-0.31484997	0.018858029		-0.262849185	0.013763966		0.044511248	0.004918617		-0.042917454	0.00633924		-0.08318879	0.025307688		-0.242084058	0.012016049		-0.292372443	0.010509317		-0.068267197	0.015907057
Bin 6	-0.063570924	0.004924465		-0.061119	0.005946168		-0.075355473	0.005955181		-0.058141445	0.015018978		-0.011379634	0.007027306		-0.03018101	0.002501289		-0.017371294	0.00767796		-0.014109186	0.001480569
