# Supplementary material for: Ssl2/TFIIH function in transcription start site scanning by RNA polymerase II in Saccharomyces cerevisiae
Source: eLife. 2021 Oct 15;10:e71013. doi: 10.7554/eLife.71013 (PMC8589449; doi:10.7554/eLife.71013)
Supplement: Figure 6—source data 1. [file elife-71013-fig6-data1.xlsx]

## Sheet: WT
	a	a*	a**	a***
	Sc-Leu	Sc-Leu+MAP	Sc-His	Sc-Lys
rpb1 H1085Y	3	3	3	0
rpb1 N1082S	5	5	5	0
rpb1 H1085Q	5	5	5	0
rpb1 F1086S	5	5	5	0
WT	6	6	0	0
rpb1 F1084I	5	4	0	4
rpb1 L1101S	5	0	0	3
rpb1 E1103G	5	1	0	5
rpb1 G1097D	4	0	0	3
	6-a	6-a*	a**	a***
	Sc-Leu	Sc-Leu+MAP	Sc-His	Sc-Lys
rpb1 H1085Y	3	3	3	0
rpb1 N1082S	1	1	5	0
rpb1 H1085Q	1	1	5	0
rpb1 F1086S	1	1	5	0
WT	0	0	0	0
rpb1 F1084I	1	2	0	4
rpb1 L1101S	1	6	0	3
rpb1 E1103G	1	5	0	5
rpb1 G1097D	2	6	0	3
	6-a	6-a*-(6-a)	a**+(6-a)	a***+(6-a)
	Sc-Leu	Sc-Leu+MAP	Sc-His	Sc-Lys
rpb1 H1085Y	3	0	6	3
rpb1 N1082S	1	0	6	1
rpb1 H1085Q	1	0	6	1
rpb1 F1086S	1	0	6	1
WT	0	0	0	0
rpb1 F1084I	1	1	1	5
rpb1 L1101S	1	5	1	4
rpb1 E1103G	1	4	1	6
rpb1 G1097D	2	4	2	5
corrected back His+
	6-a	6-a*-(6-a)	a**+(6-a)	a***+(6-a)
	Sc-Leu	Sc-Leu+MAP	Sc-His	Sc-Lys
rpb1 H1085Y	3	0	6	3
rpb1 N1082S	1	0	6	1
rpb1 H1085Q	1	0	6	1
rpb1 F1086S	1	0	6	1
WT	0	0	0	0
rpb1 F1084I	1	1	0	5
rpb1 L1101S	1	5	0	4
rpb1 E1103G	1	4	0	6
rpb1 G1097D	2	4	0	5

## Sheet: N230D
	a	a*	a**	a***
	Sc-Leu	Sc-Leu+MAP	Sc-His	Sc-Lys
rpb1 H1085Y	3	2	0	0
rpb1 N1082S	5	2	0	0
rpb1 H1085Q	5	2	0	0
rpb1 F1086S	5	2	0	0
WT	6	3	0	0
rpb1 F1084I	5	2	0	4
rpb1 L1101S	5	2	0	3
rpb1 E1103G	5	1	0	5
rpb1 G1097D	2	0	0	0
	6-a	6-a*	a**	a***
	Sc-Leu	Sc-Leu+MAP	Sc-His	Sc-Lys
rpb1 H1085Y	3	4	0	0
rpb1 N1082S	1	4	0	0
rpb1 H1085Q	1	4	0	0
rpb1 F1086S	1	4	0	0
WT	0	3	0	0
rpb1 F1084I	1	4	0	4
rpb1 L1101S	1	4	0	3
rpb1 E1103G	1	5	0	5
rpb1 G1097D	4	6	0	0
	6-a	6-a*-(6-a)	a**+(6-a)	a***+(6-a)
	Sc-Leu	Sc-Leu+MAP	Sc-His	Sc-Lys
rpb1 H1085Y	3	1	3	3
rpb1 N1082S	1	3	1	1
rpb1 H1085Q	1	3	1	1
rpb1 F1086S	1	3	1	1
WT	0	3	0	0
rpb1 F1084I	1	3	1	5
rpb1 L1101S	1	3	1	4
rpb1 E1103G	1	4	1	6
rpb1 G1097D	4	2	4	4
corrected back His+
	6-a	6-a*-(6-a)	a**+(6-a)	a***+(6-a)
	Sc-Leu	Sc-Leu+MAP	Sc-His	Sc-Lys
rpb1 H1085Y	3	1	0	3
rpb1 N1082S	1	3	0	1
rpb1 H1085Q	1	3	0	1
rpb1 F1086S	1	3	0	1
WT	0	3	0	0
rpb1 F1084I	1	3	0	5
rpb1 L1101S	1	3	0	4
rpb1 E1103G	1	4	0	6
rpb1 G1097D	4	2	0	4

## Sheet: N230I
	a	a*	a**	a***
	Sc-Leu	Sc-Leu+MAP	Sc-His	Sc-Lys
rpb1 H1085Y	-13	-13	-13	-13
rpb1 N1082S	5	5	5	3
rpb1 H1085Q	5	5	5	3
rpb1 F1086S	5	5	5	4
WT	6	6	6	4
rpb1 F1084I	5	4	0	4
rpb1 L1101S	5	2	0	0
rpb1 E1103G	5	1	0	0
rpb1 G1097D	4	0	0	0
	6-a	6-a*	a**	a***
	Sc-Leu	Sc-Leu+MAP	Sc-His	Sc-Lys
rpb1 H1085Y	19	19	-13	-13
rpb1 N1082S	1	1	5	3
rpb1 H1085Q	1	1	5	3
rpb1 F1086S	1	1	5	4
WT	0	0	6	4
rpb1 F1084I	1	2	0	4
rpb1 L1101S	1	4	0	0
rpb1 E1103G	1	5	0	0
rpb1 G1097D	2	6	0	0
	6-a	6-a*-(6-a)	a**+(6-a)	a***+(6-a)
	Sc-Leu	Sc-Leu+MAP	Sc-His	Sc-Lys
rpb1 H1085Y	19	0	6	6
rpb1 N1082S	1	0	6	4
rpb1 H1085Q	1	0	6	4
rpb1 F1086S	1	0	6	5
WT	0	0	6	4
rpb1 F1084I	1	1	1	5
rpb1 L1101S	1	3	1	1
rpb1 E1103G	1	4	1	1
rpb1 G1097D	2	4	2	2
mannually change H1085Y
	6-a	6-a*-(6-a)	a**+(6-a)	a***+(6-a)
	Sc-Leu	Sc-Leu+MAP	Sc-His	Sc-Lys
rpb1 H1085Y	7	7	7	7
rpb1 N1082S	1	0	6	4
rpb1 H1085Q	1	0	6	4
rpb1 F1086S	1	0	6	5
WT	0	0	6	4
rpb1 F1084I	1	1	1	5
rpb1 L1101S	1	3	1	1
rpb1 E1103G	1	4	1	1
rpb1 G1097D	2	4	2	2
correcte back His+
	6-a	6-a*-(6-a)	a**+(6-a)	a***+(6-a)
	Sc-Leu	Sc-Leu+MAP	Sc-His	Sc-Lys
rpb1 H1085Y	7	7	7	7
rpb1 N1082S	1	0	6	4
rpb1 H1085Q	1	0	6	4
rpb1 F1086S	1	0	6	5
WT	0	0	6	4
rpb1 F1084I	1	1	0	5
rpb1 L1101S	1	3	0	1
rpb1 E1103G	1	4	0	1
rpb1 G1097D	2	4	0	2
