# Supplementary material for: Ssl2/TFIIH function in transcription start site scanning by RNA polymerase II in Saccharomyces cerevisiae
Source: eLife. 2021 Oct 15;10:e71013. doi: 10.7554/eLife.71013 (PMC8589449; doi:10.7554/eLife.71013)
Supplement: Figure 7—source data 1. [file elife-71013-fig7-data1.xlsx]

## Sheet: WT
	a	a*	a**	a***	a	a*	a**	a***	a	a*	a**	a***	a	a*	a**	a***
	Sc-Leu	Sc-Leu+MAP	Sc-His	Sc-Lys	Sc-Leu	Sc-Leu+MAP	Sc-His	Sc-Lys	Sc-Leu	Sc-Leu+MAP	Sc-His	Sc-Lys	Sc-Leu	Sc-Leu+MAP	Sc-His	Sc-Lys
	WT	WT	WT	WT	sua7-1	sua7-1	sua7-1	sua7-1	tfg2	tfg2	tfg2	tfg2	sub1	sub1	sub1	sub1
SSL2	6	6	0	0	5	5	5	0	6	2	0	1	6	6	6	0
I170T	6	6	6	0	-13	-13	-13	-13	N/A	N/A	N/A	N/A	N/A	N/A	N/A	N/A
L225P	5	5	4	3	-13	-13	-13	-13	5	3	0	4	5	5	5	1
N230I	6	6	6	6	-13	-13	-13	-13	6	4	0	6	6	6	6	6
E340G	6	6	6	1	-13	-13	-13	-13	N/A	N/A	N/A	N/A	N/A	N/A	N/A	N/A
R636C	6	6	2	0	-13	-13	-13	-13	6	3	0	0	6	6	6	0
V226D	6	6	6	6	-13	-13	-13	-13	N/A	N/A	N/A	N/A	N/A	N/A	N/A	N/A
N230D	6	1	0	0	6	2	0	0	-13	-13	-13	-13	6	2	0	0
V473D	5	1	0	0	5	0	0	0	-13	-13	-13	-13	5	1	0	0
F498L	5	0	0	0	-13	-13	-13	-13	-13	-13	-13	-13	-13	-13	-13	-13
D522V	6	1	0	0	6	1	0	0	-13	-13	-13	-13	6	2	0	0
Y750*	6	3	0	0	6	3	0	0	-13	-13	-13	-13	6	6	0	0
	6-a	6-a*	a**	a***	6-a	6-a*	a**	a***	6-a	6-a*	a**	a***	6-a	6-a*	a**	a***
	Sc-Leu	Sc-Leu+MAP	Sc-His	Sc-Lys	Sc-Leu	Sc-Leu+MAP	Sc-His	Sc-Lys	Sc-Leu	Sc-Leu+MAP	Sc-His	Sc-Lys	Sc-Leu	Sc-Leu+MAP	Sc-His	Sc-Lys
	WT	WT	WT	WT	sua7-1	sua7-1	sua7-1	sua7-1	tfg2	tfg2	tfg2	tfg2	sub1	sub1	sub1	sub1
SSL2	0	0	0	0	1	1	5	0	0	4	0	1	0	0	6	0
I170T	0	0	6	0	19	19	-13	-13	N/A	N/A	N/A	N/A	N/A	N/A	N/A	N/A
L225P	1	1	4	3	19	19	-13	-13	1	3	0	4	1	1	5	1
N230I	0	0	6	6	19	19	-13	-13	0	2	0	6	0	0	6	6
E340G	0	0	6	1	19	19	-13	-13	N/A	N/A	N/A	N/A	N/A	N/A	N/A	N/A
R636C	0	0	2	0	19	19	-13	-13	0	3	0	0	0	0	6	0
V226D	0	0	6	6	19	19	-13	-13	N/A	N/A	N/A	N/A	N/A	N/A	N/A	N/A
N230D	0	5	0	0	0	4	0	0	19	19	-13	-13	0	4	0	0
V473D	1	5	0	0	1	6	0	0	19	19	-13	-13	1	5	0	0
F498L	1	6	0	0	19	19	-13	-13	19	19	-13	-13	19	19	-13	-13
D522V	0	5	0	0	0	5	0	0	19	19	-13	-13	0	4	0	0
Y750*	0	3	0	0	0	3	0	0	19	19	-13	-13	0	0	0	0
	6-a	6-a*-(6-a)	a**+(6-a)	a***+(6-a)	6-a	6-a*-(6-a)	a**+(6-a)	a***+(6-a)	6-a	6-a*-(6-a)	a**+(6-a)	a***+(6-a)	6-a	6-a*-(6-a)	a**+(6-a)	a***+(6-a)
	Sc-Leu	Sc-Leu+MAP	Sc-His	Sc-Lys	Sc-Leu	Sc-Leu+MAP	Sc-His	Sc-Lys	Sc-Leu	Sc-Leu+MAP	Sc-His	Sc-Lys	Sc-Leu	Sc-Leu+MAP	Sc-His	Sc-Lys
	WT	WT	WT	WT	sua7-1	sua7-1	sua7-1	sua7-1	tfg2	tfg2	tfg2	tfg2	sub1	sub1	sub1	sub1
SSL2	0	0	0	0	1	0	6	1	0	4	0	1	0	0	6	0
I170T	0	0	6	0	19	0	6	6	N/A	N/A	N/A	N/A	N/A	N/A	N/A	N/A
L225P	1	0	5	4	19	0	6	6	1	2	1	5	1	0	6	2
N230I	0	0	6	6	19	0	6	6	0	2	0	6	0	0	6	6
E340G	0	0	6	1	19	0	6	6	N/A	N/A	N/A	N/A	N/A	N/A	N/A	N/A
R636C	0	0	2	0	19	0	6	6	0	3	0	0	0	0	6	0
V226D	0	0	6	6	19	0	6	6	N/A	N/A	N/A	N/A	N/A	N/A	N/A	N/A
N230D	0	5	0	0	0	4	0	0	19	0	6	6	0	4	0	0
V473D	1	4	1	1	1	5	1	1	19	0	6	6	1	4	1	1
F498L	1	5	1	1	19	0	6	6	19	0	6	6	19	0	6	6
D522V	0	5	0	0	0	5	0	0	19	0	6	6	0	4	0	0
Y750*	0	3	0	0	0	3	0	0	19	0	6	6	0	0	0	0
manually add lethal
	6-a	6-a*-(6-a)	a**+(6-a)	a***+(6-a)	6-a	6-a*-(6-a)	a**+(6-a)	a***+(6-a)	6-a	6-a*-(6-a)	a**+(6-a)	a***+(6-a)	6-a	6-a*-(6-a)	a**+(6-a)	a***+(6-a)
	Sc-Leu	Sc-Leu+MAP	Sc-His	Sc-Lys	Sc-Leu	Sc-Leu+MAP	Sc-His	Sc-Lys	Sc-Leu	Sc-Leu+MAP	Sc-His	Sc-Lys	Sc-Leu	Sc-Leu+MAP	Sc-His	Sc-Lys
	WT	WT	WT	WT	sua7-1	sua7-1	sua7-1	sua7-1	tfg2	tfg2	tfg2	tfg2	sub1	sub1	sub1	sub1
SSL2	0	0	0	0	1	0	6	1	0	4	0	1	0	0	6	0
I170T	0	0	6	0	19	19	19	19	N/A	N/A	N/A	N/A	N/A	N/A	N/A	N/A
L225P	1	0	5	4	19	19	19	19	1	2	1	5	1	0	6	2
N230I	0	0	6	6	19	19	19	19	0	2	0	6	0	0	6	6
E340G	0	0	6	1	19	19	19	19	N/A	N/A	N/A	N/A	N/A	N/A	N/A	N/A
R636C	0	0	2	0	19	19	19	19	0	3	0	0	0	0	6	0
V226D	0	0	6	6	19	19	19	19	N/A	N/A	N/A	N/A	N/A	N/A	N/A	N/A
N230D	0	5	0	0	0	4	0	0	19	19	19	19	0	4	0	0
V473D	1	4	1	1	1	5	1	1	19	19	19	19	1	4	1	1
F498L	1	5	1	1	19	19	19	19	19	19	19	19	19	19	19	19
D522V	0	5	0	0	0	5	0	0	19	19	19	19	0	4	0	0
Y750*	0	3	0	0	0	3	0	0	19	19	19	19	0	0	0	0
correcte back His+
	6-a	6-a*-(6-a)	a**+(6-a)	a***+(6-a)	6-a	6-a*-(6-a)	a**+(6-a)	a***+(6-a)	6-a	6-a*-(6-a)	a**+(6-a)	a***+(6-a)	6-a	6-a*-(6-a)	a**+(6-a)	a***+(6-a)
	Sc-Leu	Sc-Leu+MAP	Sc-His	Sc-Lys	Sc-Leu	Sc-Leu+MAP	Sc-His	Sc-Lys	Sc-Leu	Sc-Leu+MAP	Sc-His	Sc-Lys	Sc-Leu	Sc-Leu+MAP	Sc-His	Sc-Lys
	WT	WT	WT	WT	sua7-1	sua7-1	sua7-1	sua7-1	tfg2	tfg2	tfg2	tfg2	sub1	sub1	sub1	sub1
SSL2	0	0	0	0	1	0	6	1	0	4	0	1	0	0	6	0
I170T	0	0	6	0	19	19	19	19	N/A	N/A	N/A	N/A	N/A	N/A	N/A	N/A
L225P	1	0	5	4	19	19	19	19	1	2	0	5	1	0	6	2
N230I	0	0	6	6	19	19	19	19	0	2	0	6	0	0	6	6
E340G	0	0	6	1	19	19	19	19	N/A	N/A	N/A	N/A	N/A	N/A	N/A	N/A
R636C	0	0	2	0	19	19	19	19	0	3	0	0	0	0	6	0
V226D	0	0	6	6	19	19	19	19	N/A	N/A	N/A	N/A	N/A	N/A	N/A	N/A
N230D	0	5	0	0	0	4	0	0	19	19	19	19	0	4	0	0
V473D	1	4	0	1	1	5	0	1	19	19	19	19	1	4	0	1
F498L	1	5	0	1	19	19	19	19	19	19	19	19	19	19	19	19
D522V	0	5	0	0	0	5	0	0	19	19	19	19	0	4	0	0
Y750*	0	3	0	0	0	3	0	0	19	19	19	19	0	0	0	0
