# Supplementary material for: Ssl2/TFIIH function in transcription start site scanning by RNA polymerase II in Saccharomyces cerevisiae
Source: eLife. 2021 Oct 15;10:e71013. doi: 10.7554/eLife.71013 (PMC8589449; doi:10.7554/eLife.71013)
Supplement: Figure 7—source data 4. [file elife-71013-fig7-data4.csv]

	ssl2 singles								sub1Æ single		ssl2 sub1Æ doubles
	N230D	V473D	D522V	Y750*	L225P	N230I	R636C		sub1Æ		N230D	V473D	D522V	Y750*	L225P	N230I	R636C
Bin 1	0.002668356	0.002246209	0.001262144	0.01038221	0.01991789	0.001056359	0.001206654		0.004298213		0.005749724	0.005811059	0.002323192	0.01047856	0.01564102	0.0112555	0.002653728
Bin 2	0.02138014	0.01206148	0.02760199	0.03703865	0.006764834	-0.003842249	-0.006184037		-0.01041162		0.007744003	0.006909481	0.00137466	0.01341081	-0.000460652	-0.000230831	-0.01854621
Bin 3	0.1826978	0.2439599	0.1195182	0.09737945	-0.1288279	-0.1293322	-0.1215884		-0.3016216		-0.04576813	0.05076702	-0.04458499	-0.1770376	-0.4045047	-0.4167631	-0.3837679
Bin 4	-0.002939051	-0.009280346	-0.000591945	0.000870811	0.00360154	0.000645301	0.004284787		0.009737913		0.006358091	0.005231199	0.005947381	0.01106897	0.03135693	0.0574056	0.008258476
Bin 5	-0.1877272	-0.2398509	-0.1331027	-0.1824259	0.008796071	0.08874978	0.06360265		0.2320125		0.02611205	-0.08193853	0.03072586	0.1110763	0.210775	0.2091517	0.2181311
Bin 6	-0.01608004	-0.009136323	-0.01468773	0.03675477	0.08974759	0.04272306	0.05867833		0.06598461		-0.000195738	0.01321976	0.004213897	0.03100299	0.1471924	0.1391812	0.1732708
