# Supplementary material for: Ssl2/TFIIH function in transcription start site scanning by RNA polymerase II in Saccharomyces cerevisiae
Source: eLife. 2021 Oct 15;10:e71013. doi: 10.7554/eLife.71013 (PMC8589449; doi:10.7554/eLife.71013)
Supplement: Figure 9—figure supplement 1—source data 1. [file elife-71013-fig9-figsupp1-data1.csv]

	Ssl2						Ssl2						Sua7						Sua7						Ssl2						Ssl2						Sua7						Sua7
	Taf1-Enriched TOP						Taf1-Depleted TOP						Taf1-Enriched TOP						Taf1-Depleted TOP						Taf1-Enriched BOT						Taf1-Depleted BOT						Taf1-Enriched BOT						Taf1-Depleted BOT
Position	SSL2-1	N230D-1	N230I-1	SSL2-2	N230D-2	N230I-2	SSL2-1	N230D-1	N230I-1	SSL2-2	N230D-2	N230I-2	SSL2-1	N230D-1	N230I-1	SSL2-2	N230D-2	N230I-2	SSL2-1	N230D-1	N230I-1	SSL2-2	N230D-2	N230I-2	SSL2-1	N230D-1	N230I-1	SSL2-2	N230D-2	N230I-2	SSL2-1	N230D-1	N230I-1	SSL2-2	N230D-2	N230I-2	SSL2-1	N230D-1	N230I-1	SSL2-2	N230D-2	N230I-2	SSL2-1	N230D-1	N230I-1	SSL2-2	N230D-2	N230I-2
-250	0.23854	0.2292	0.236313	0.241247	0.236723	0.224962	0.177219	0.169253	0.151207	0.166471	0.164132	0.14491	0.236343	0.253628	0.240439	0.243904	0.244244	0.241543	0.160592	0.17017	0.162316	0.16697	0.177747	0.158797	0.151288	0.13914	0.158456	0.1497	0.131551	0.168087	0.108543	0.107286	0.119072	0.107291	0.111583	0.11404	0.12102	0.124929	0.142032	0.124172	0.119299	0.133012	0.0975801	0.10598	0.109026	0.0985187	0.0997596	0.109673
-249	0.238343	0.226889	0.225733	0.22622	0.222103	0.218523	0.16495	0.164597	0.14782	0.157219	0.171898	0.152337	0.229489	0.252646	0.230976	0.22915	0.241756	0.240579	0.163098	0.170917	0.13829	0.175157	0.178197	0.148485	0.16186	0.137757	0.171002	0.162729	0.140777	0.177416	0.117433	0.109207	0.123385	0.109704	0.107696	0.106291	0.136251	0.131693	0.143596	0.136345	0.124992	0.14113	0.102845	0.0913937	0.101082	0.100789	0.105584	0.105626
-248	0.236148	0.223225	0.224149	0.227597	0.230145	0.226147	0.169039	0.173496	0.148092	0.165561	0.153503	0.143715	0.239328	0.243584	0.249722	0.241422	0.239343	0.245682	0.165486	0.189949	0.164962	0.172055	0.181755	0.167998	0.159297	0.15152	0.180184	0.164212	0.143677	0.190562	0.11492	0.109483	0.132691	0.112981	0.107502	0.128547	0.135623	0.12856	0.148635	0.136278	0.132843	0.147091	0.107096	0.102876	0.111642	0.108108	0.112871	0.122016
-247	0.242036	0.232808	0.228444	0.23755	0.238254	0.233221	0.156646	0.144442	0.144125	0.159219	0.153959	0.143265	0.247576	0.243576	0.249589	0.246761	0.247467	0.247073	0.15187	0.153346	0.153363	0.156719	0.155514	0.15052	0.16038	0.138531	0.166053	0.14709	0.137067	0.167532	0.11957	0.111944	0.129901	0.11734	0.11063	0.109135	0.130462	0.12477	0.141427	0.128022	0.125223	0.141007	0.101079	0.107575	0.112651	0.101128	0.0899207	0.107433
-246	0.231272	0.227161	0.223816	0.240023	0.218487	0.22708	0.14814	0.155265	0.143355	0.146902	0.141256	0.130722	0.236012	0.238463	0.237364	0.223874	0.233673	0.235754	0.146667	0.178116	0.155111	0.147574	0.160909	0.146445	0.168433	0.15128	0.180008	0.162995	0.158042	0.187034	0.129828	0.125744	0.136569	0.118286	0.11566	0.112599	0.148345	0.131411	0.16088	0.149851	0.131945	0.157033	0.102781	0.103292	0.12181	0.11803	0.106152	0.112422
-245	0.222844	0.22367	0.222543	0.236942	0.23699	0.22457	0.14886	0.149382	0.127942	0.128729	0.144095	0.128199	0.235851	0.24159	0.243855	0.24509	0.244509	0.239766	0.152974	0.149366	0.144399	0.143763	0.152644	0.144838	0.166675	0.154123	0.181564	0.168298	0.142485	0.177576	0.126049	0.124578	0.142564	0.126609	0.12125	0.128626	0.137454	0.131303	0.157094	0.141347	0.13064	0.14437	0.105581	0.105087	0.112355	0.122062	0.10622	0.103985
-244	0.223912	0.218472	0.215116	0.217212	0.218514	0.221391	0.138381	0.156746	0.1246	0.137586	0.143658	0.140396	0.22431	0.239053	0.226732	0.225944	0.233594	0.229978	0.151239	0.156071	0.147892	0.153649	0.161914	0.145102	0.17351	0.149047	0.174367	0.179728	0.151172	0.183845	0.137211	0.130048	0.1446	0.117883	0.1225	0.133996	0.151192	0.138245	0.162934	0.139772	0.139962	0.155005	0.116813	0.117496	0.114697	0.11433	0.108575	0.109102
-243	0.234067	0.225106	0.221436	0.229031	0.222524	0.215172	0.148145	0.155827	0.12448	0.139407	0.146227	0.142838	0.231999	0.237737	0.237583	0.239083	0.237204	0.233032	0.15318	0.152682	0.158381	0.148534	0.163721	0.147919	0.159648	0.138981	0.175486	0.159586	0.135153	0.175208	0.121795	0.120009	0.117552	0.110587	0.120006	0.130168	0.138095	0.133772	0.153976	0.132763	0.120818	0.142776	0.117393	0.106038	0.109467	0.11351	0.114071	0.116236
-242	0.235659	0.227917	0.2198	0.230685	0.221673	0.22286	0.15572	0.155162	0.14721	0.148495	0.158668	0.146994	0.238447	0.233552	0.243298	0.234401	0.241611	0.243935	0.155895	0.170669	0.160043	0.166914	0.162525	0.162903	0.175567	0.161655	0.192826	0.172962	0.154205	0.187717	0.131494	0.137366	0.141188	0.125932	0.12414	0.128647	0.151721	0.143243	0.162127	0.15011	0.137194	0.16295	0.117007	0.121246	0.127939	0.121445	0.124048	0.124518
-241	0.229047	0.222666	0.210259	0.235822	0.227842	0.225964	0.14463	0.145985	0.133222	0.165316	0.148765	0.139021	0.238762	0.243684	0.242002	0.245964	0.228404	0.245183	0.154989	0.171444	0.147118	0.156648	0.158846	0.146533	0.170725	0.150394	0.182416	0.168911	0.150391	0.1764	0.132949	0.132906	0.125721	0.134458	0.128313	0.141568	0.148705	0.140368	0.155858	0.144386	0.134975	0.165208	0.114848	0.122593	0.115484	0.106576	0.107805	0.115215
-240	0.241676	0.23552	0.2358	0.239855	0.236075	0.224179	0.156485	0.16719	0.153792	0.168171	0.163035	0.148454	0.244809	0.250214	0.250335	0.253612	0.246352	0.260827	0.173704	0.175134	0.157848	0.165584	0.162356	0.155465	0.168102	0.151863	0.181704	0.17167	0.150984	0.183023	0.130116	0.144519	0.135404	0.154917	0.132555	0.130052	0.145961	0.141024	0.156664	0.138409	0.130428	0.154183	0.112817	0.122429	0.133496	0.124252	0.120337	0.119671
-239	0.237109	0.226028	0.230101	0.23817	0.231338	0.213956	0.163206	0.159388	0.151142	0.154957	0.155355	0.149933	0.245749	0.233049	0.240438	0.223217	0.240634	0.24379	0.160857	0.164709	0.155553	0.163393	0.174247	0.161174	0.170264	0.145898	0.186036	0.165459	0.147666	0.175997	0.131222	0.125238	0.125732	0.12262	0.127286	0.136648	0.145165	0.144086	0.150094	0.146075	0.13718	0.157065	0.118497	0.107365	0.121156	0.12204	0.115788	0.131378
-238	0.231257	0.227211	0.229643	0.230806	0.224988	0.218212	0.152139	0.149568	0.139433	0.145872	0.147159	0.142341	0.235048	0.244178	0.249594	0.241613	0.244718	0.241812	0.154417	0.179158	0.149757	0.151996	0.170212	0.160605	0.170646	0.153396	0.176613	0.166075	0.14479	0.185842	0.129262	0.123007	0.133371	0.123459	0.128816	0.138213	0.143553	0.137001	0.155412	0.140309	0.129765	0.15393	0.116447	0.100792	0.114276	0.110168	0.109435	0.10622
-237	0.233143	0.237455	0.226192	0.236227	0.228139	0.223888	0.157965	0.153713	0.14451	0.159736	0.140685	0.140946	0.241498	0.250969	0.247896	0.254016	0.248519	0.248262	0.162795	0.159283	0.153123	0.148155	0.174151	0.13903	0.173907	0.160311	0.188979	0.169916	0.152367	0.189611	0.127909	0.126653	0.122418	0.131966	0.11462	0.120195	0.146974	0.132125	0.163151	0.149134	0.133768	0.15899	0.105994	0.113477	0.112104	0.108444	0.114498	0.11651
-236	0.233128	0.228911	0.213065	0.241476	0.229619	0.224118	0.142029	0.151587	0.139238	0.133031	0.140647	0.140884	0.232567	0.24715	0.243713	0.249409	0.247148	0.245633	0.158409	0.183917	0.148823	0.152667	0.153883	0.154207	0.179787	0.164238	0.193603	0.177081	0.160996	0.195736	0.118393	0.103425	0.120405	0.125819	0.11961	0.130083	0.150433	0.143978	0.17168	0.15256	0.143477	0.161458	0.114314	0.108404	0.114761	0.114346	0.0998364	0.106323
-235	0.248612	0.244819	0.236289	0.245566	0.239687	0.236693	0.146832	0.168676	0.148388	0.166582	0.169208	0.149947	0.251789	0.257754	0.252651	0.260349	0.254783	0.258456	0.165515	0.171623	0.161534	0.161792	0.16986	0.165603	0.178316	0.15877	0.187567	0.171936	0.157052	0.187081	0.128515	0.130069	0.120189	0.125717	0.127332	0.134722	0.14872	0.138815	0.164771	0.148871	0.137941	0.156997	0.10991	0.113918	0.112243	0.111211	0.109366	0.115108
-234	0.232119	0.236052	0.221502	0.238223	0.228438	0.226463	0.151525	0.154037	0.140781	0.146421	0.157438	0.147391	0.251356	0.258866	0.249691	0.248831	0.260556	0.244047	0.160619	0.159829	0.163256	0.164195	0.159659	0.166057	0.184399	0.163265	0.185419	0.177339	0.15269	0.18542	0.117937	0.118838	0.129287	0.124885	0.117484	0.127577	0.157524	0.153841	0.16386	0.149569	0.144339	0.167858	0.112089	0.0986789	0.106549	0.106949	0.111441	0.10332
-233	0.237056	0.237407	0.22501	0.242227	0.243419	0.236467	0.150279	0.157073	0.148699	0.15553	0.169759	0.142046	0.251029	0.255113	0.249373	0.257401	0.249777	0.258699	0.164127	0.188863	0.162576	0.161286	0.179816	0.150405	0.190036	0.165413	0.197058	0.181904	0.161257	0.193859	0.123283	0.132315	0.139098	0.13536	0.117423	0.132337	0.16124	0.14753	0.169695	0.152907	0.145988	0.164177	0.113903	0.114164	0.118901	0.111075	0.116185	0.117299
-232	0.23729	0.226316	0.212274	0.235011	0.234851	0.216024	0.152449	0.149951	0.140854	0.16168	0.154032	0.146433	0.25544	0.246142	0.248198	0.244841	0.245757	0.244299	0.148109	0.164115	0.154801	0.145391	0.163286	0.153509	0.195021	0.167652	0.198773	0.186446	0.163759	0.191809	0.13581	0.137519	0.140216	0.139049	0.132529	0.143067	0.156626	0.158508	0.171924	0.168696	0.14515	0.169061	0.122929	0.113805	0.135583	0.119688	0.123606	0.127935
-231	0.230023	0.228537	0.214844	0.243845	0.237439	0.236727	0.160872	0.156205	0.145687	0.150544	0.16375	0.143192	0.241386	0.247511	0.250324	0.248395	0.253248	0.254247	0.16349	0.180821	0.15362	0.168145	0.189785	0.155332	0.194526	0.162549	0.194966	0.182875	0.171329	0.189356	0.138996	0.12558	0.135237	0.127903	0.132373	0.131156	0.159038	0.153209	0.173695	0.158463	0.143665	0.165076	0.114945	0.114701	0.109021	0.114702	0.113583	0.112821
-230	0.223841	0.222017	0.209302	0.23289	0.232079	0.22386	0.150638	0.154625	0.14692	0.161592	0.15498	0.155196	0.236647	0.239419	0.232032	0.233173	0.240459	0.239893	0.172236	0.184334	0.162806	0.155012	0.180039	0.16854	0.193962	0.165123	0.19433	0.18801	0.170535	0.196677	0.141716	0.127434	0.150013	0.13848	0.125425	0.127812	0.161314	0.154031	0.17851	0.163696	0.150022	0.174707	0.122211	0.11649	0.123463	0.110394	0.117455	0.125047
-229	0.229469	0.219817	0.222049	0.237333	0.229407	0.216952	0.171115	0.155341	0.154316	0.165765	0.152213	0.168921	0.252479	0.245977	0.245062	0.243164	0.250587	0.256326	0.18667	0.192677	0.157774	0.173378	0.187803	0.172227	0.19678	0.170584	0.20357	0.191358	0.165593	0.192623	0.139637	0.13958	0.12961	0.137362	0.126052	0.131285	0.164128	0.153983	0.183037	0.165527	0.159234	0.1685	0.126147	0.114095	0.131926	0.121085	0.117203	0.110397
-228	0.222133	0.22811	0.213056	0.232513	0.232162	0.221773	0.157084	0.154559	0.156125	0.157106	0.16027	0.157124	0.248266	0.256369	0.24195	0.237169	0.249691	0.24238	0.167088	0.180799	0.166007	0.167268	0.172744	0.173139	0.193525	0.174851	0.210041	0.199633	0.174661	0.202094	0.137512	0.133532	0.13919	0.125055	0.118266	0.121832	0.170081	0.158609	0.177672	0.168842	0.156189	0.17634	0.11534	0.10338	0.114168	0.111083	0.114167	0.103092
-227	0.226512	0.235382	0.217625	0.232689	0.222903	0.22324	0.148536	0.153936	0.138375	0.141639	0.14276	0.136282	0.257782	0.258575	0.254739	0.252675	0.263319	0.253717	0.141028	0.174513	0.156166	0.158238	0.163102	0.160538	0.202453	0.182121	0.206938	0.193917	0.172533	0.202155	0.139152	0.123063	0.142688	0.136815	0.126981	0.124495	0.170184	0.153436	0.189364	0.167065	0.154049	0.18457	0.116228	0.104646	0.127507	0.11196	0.121421	0.111671
-226	0.226201	0.223451	0.221187	0.232111	0.223295	0.222358	0.150587	0.161844	0.149208	0.155436	0.171964	0.14526	0.248296	0.247447	0.244005	0.241461	0.261366	0.245951	0.160993	0.175716	0.165757	0.161676	0.174831	0.155758	0.202879	0.184941	0.199373	0.199112	0.177833	0.204923	0.130815	0.127945	0.123261	0.137481	0.12933	0.129937	0.172782	0.161503	0.180833	0.164129	0.158334	0.178136	0.114953	0.110097	0.120925	0.114501	0.120579	0.121275
-225	0.231227	0.226632	0.222037	0.224772	0.229706	0.21557	0.168965	0.164774	0.142011	0.156658	0.150804	0.146206	0.253264	0.239045	0.244279	0.245799	0.260911	0.245177	0.171178	0.18225	0.167215	0.160949	0.166695	0.162298	0.199786	0.178997	0.207657	0.193355	0.169621	0.203337	0.134983	0.1355	0.126585	0.128572	0.12204	0.131738	0.155394	0.156925	0.186889	0.168665	0.161012	0.177566	0.123382	0.108175	0.115915	0.121775	0.120534	0.117244
-224	0.225213	0.226675	0.21378	0.223128	0.225338	0.211652	0.148256	0.162306	0.153873	0.152051	0.151074	0.148384	0.243114	0.256844	0.241416	0.243612	0.246374	0.250254	0.163237	0.17815	0.161646	0.162609	0.174984	0.157311	0.201195	0.181597	0.203391	0.198765	0.173668	0.217265	0.134375	0.117748	0.11699	0.117044	0.127353	0.12458	0.169114	0.165535	0.183716	0.172491	0.166202	0.188393	0.104652	0.108952	0.113185	0.108982	0.108646	0.115168
-223	0.225196	0.231195	0.216512	0.223379	0.223386	0.218233	0.159181	0.165067	0.142342	0.164179	0.172689	0.151426	0.24117	0.245146	0.238267	0.241141	0.240866	0.237595	0.174917	0.176559	0.162822	0.166897	0.181674	0.163804	0.203666	0.18199	0.206981	0.201877	0.181015	0.205194	0.140965	0.138161	0.134845	0.135236	0.135051	0.137837	0.170911	0.170055	0.187951	0.170958	0.163934	0.185939	0.120858	0.138218	0.136392	0.140064	0.120458	0.133172
-222	0.231856	0.228485	0.219954	0.232875	0.226413	0.227481	0.149329	0.152339	0.137105	0.145157	0.154094	0.137514	0.248735	0.251743	0.255871	0.241117	0.243307	0.250385	0.170274	0.167779	0.171726	0.165795	0.172561	0.17257	0.203521	0.192292	0.21095	0.195176	0.174175	0.207605	0.124021	0.136177	0.129842	0.130336	0.123699	0.123608	0.180465	0.160953	0.182308	0.16559	0.159168	0.176466	0.124297	0.120458	0.132716	0.124373	0.132141	0.118481
-221	0.222398	0.223508	0.213033	0.217315	0.228503	0.217426	0.170513	0.165009	0.14857	0.158155	0.159953	0.158025	0.243213	0.242514	0.237758	0.243613	0.239043	0.243752	0.17383	0.174998	0.163247	0.165674	0.184598	0.169182	0.197768	0.195349	0.206208	0.19469	0.176427	0.212154	0.131284	0.140777	0.129964	0.125951	0.129226	0.130808	0.172144	0.166914	0.185481	0.17098	0.159665	0.184548	0.117975	0.116824	0.117094	0.115928	0.112837	0.11666
-220	0.2462	0.231878	0.226237	0.234909	0.246837	0.220405	0.16559	0.162658	0.151988	0.159254	0.165599	0.147051	0.256775	0.276773	0.256697	0.265799	0.268457	0.253542	0.171527	0.184273	0.167321	0.169844	0.185211	0.163512	0.199685	0.18654	0.213964	0.199537	0.186129	0.201034	0.146356	0.130357	0.130528	0.129162	0.127274	0.126972	0.178069	0.166264	0.187395	0.174307	0.162987	0.17884	0.122461	0.127205	0.113615	0.12418	0.116909	0.11193
-219	0.226218	0.228142	0.216904	0.221235	0.225459	0.215628	0.177989	0.170942	0.155907	0.181858	0.1729	0.170892	0.24259	0.242207	0.249958	0.255121	0.253218	0.242051	0.177415	0.188815	0.1871	0.171701	0.17171	0.176411	0.202284	0.182275	0.207895	0.191033	0.18106	0.21341	0.13218	0.128062	0.136775	0.127744	0.133053	0.130882	0.178051	0.169716	0.19228	0.180473	0.15976	0.181747	0.121189	0.115373	0.131212	0.124654	0.1146	0.127699
-218	0.236554	0.236679	0.219984	0.238399	0.242197	0.220594	0.142546	0.155134	0.140343	0.15143	0.151015	0.1474	0.251439	0.241974	0.256601	0.249997	0.262635	0.257335	0.16099	0.167368	0.158978	0.152059	0.170776	0.154451	0.213713	0.193825	0.214641	0.196112	0.186526	0.206512	0.120071	0.131069	0.119796	0.117083	0.121459	0.124963	0.187485	0.182638	0.19676	0.184056	0.171628	0.194624	0.11912	0.118008	0.1174	0.111955	0.105264	0.111533
-217	0.217118	0.229101	0.226215	0.224043	0.237706	0.222653	0.156149	0.155307	0.154723	0.155139	0.167659	0.14718	0.256498	0.252232	0.255518	0.256478	0.253905	0.259851	0.167637	0.195504	0.159398	0.168424	0.182997	0.171334	0.205797	0.191785	0.220847	0.208565	0.194947	0.20598	0.130704	0.141123	0.122165	0.124642	0.124306	0.132492	0.181085	0.172972	0.185407	0.176287	0.168203	0.191545	0.123742	0.112121	0.124445	0.11796	0.122455	0.124219
-216	0.222194	0.223301	0.211524	0.22481	0.226503	0.222783	0.169505	0.173113	0.155755	0.167111	0.161562	0.150637	0.240673	0.255195	0.246341	0.249912	0.257393	0.252155	0.176474	0.187713	0.175643	0.181021	0.185108	0.18464	0.220139	0.196441	0.214844	0.212909	0.190274	0.221516	0.143582	0.129835	0.136683	0.139869	0.131851	0.135834	0.194264	0.180811	0.198251	0.183636	0.176619	0.191363	0.11549	0.130351	0.128555	0.129939	0.115106	0.124623
-215	0.236753	0.239656	0.216644	0.25204	0.250831	0.235561	0.157808	0.171476	0.141504	0.151288	0.158649	0.146579	0.257382	0.278824	0.263409	0.268604	0.273236	0.264491	0.181027	0.201921	0.160422	0.164097	0.183048	0.167256	0.208664	0.194952	0.212739	0.217334	0.193134	0.2089	0.143313	0.14611	0.13458	0.137772	0.134838	0.146868	0.182444	0.16978	0.189215	0.184476	0.174228	0.188182	0.129347	0.126033	0.128179	0.1318	0.126859	0.135166
-214	0.227744	0.230383	0.218445	0.23581	0.238286	0.225725	0.150231	0.163379	0.14159	0.156568	0.164553	0.147204	0.253495	0.266672	0.252632	0.249435	0.258096	0.257184	0.148266	0.172538	0.152346	0.158248	0.179345	0.161051	0.214966	0.188613	0.218698	0.205426	0.195405	0.211515	0.148426	0.134862	0.147826	0.140379	0.14093	0.133497	0.182369	0.170586	0.188575	0.178726	0.164209	0.185592	0.132817	0.120364	0.133255	0.123248	0.119859	0.129037
-213	0.229863	0.227364	0.21516	0.22618	0.231481	0.221238	0.15618	0.1643	0.151802	0.158885	0.149272	0.159602	0.24717	0.254852	0.245647	0.251204	0.257801	0.247429	0.174177	0.186663	0.163916	0.166328	0.18592	0.167941	0.214341	0.192264	0.206814	0.20064	0.18648	0.209243	0.121915	0.140373	0.138677	0.129691	0.133818	0.137936	0.178173	0.166211	0.189707	0.175937	0.167156	0.192982	0.136547	0.133582	0.117546	0.111839	0.113591	0.12684
-212	0.228747	0.234948	0.214378	0.232131	0.236921	0.223704	0.162158	0.191437	0.165635	0.179298	0.175297	0.165795	0.250921	0.256894	0.257415	0.254054	0.262252	0.25221	0.190063	0.199888	0.179076	0.192563	0.200847	0.181221	0.211153	0.191351	0.206849	0.207722	0.185772	0.211782	0.13802	0.144899	0.136108	0.143604	0.143178	0.125675	0.183091	0.168078	0.190773	0.176176	0.162108	0.192433	0.128913	0.126935	0.122166	0.130468	0.115796	0.122135
-211	0.222707	0.230896	0.20138	0.222001	0.237626	0.216077	0.170036	0.164753	0.162266	0.172208	0.16577	0.156915	0.248872	0.247905	0.24752	0.247692	0.257975	0.251686	0.185791	0.192862	0.184693	0.178795	0.207849	0.167964	0.213995	0.204926	0.22307	0.219959	0.201342	0.22426	0.135418	0.14093	0.139265	0.144065	0.130463	0.132923	0.186197	0.180564	0.201214	0.185052	0.180074	0.195519	0.124098	0.139064	0.139289	0.115547	0.125272	0.130013
-210	0.2247	0.245676	0.220979	0.242396	0.246764	0.22876	0.156568	0.157053	0.144584	0.145701	0.159698	0.155918	0.247191	0.274285	0.254581	0.248172	0.261278	0.263802	0.174094	0.188742	0.169889	0.173192	0.197858	0.175042	0.219433	0.19778	0.226522	0.212823	0.204039	0.216069	0.145459	0.12638	0.134252	0.147223	0.128385	0.142321	0.191686	0.18792	0.193712	0.191501	0.175704	0.19543	0.122887	0.124398	0.119412	0.120631	0.113627	0.115692
-209	0.233161	0.220198	0.209458	0.224671	0.242237	0.229116	0.172273	0.160979	0.157181	0.161923	0.16486	0.153059	0.256017	0.251086	0.25179	0.265398	0.265214	0.250759	0.183234	0.193272	0.16832	0.182669	0.189115	0.17334	0.220139	0.20467	0.230728	0.210105	0.210267	0.220945	0.156218	0.136918	0.146449	0.152373	0.142446	0.152086	0.184349	0.183269	0.20741	0.188573	0.185514	0.196639	0.133976	0.12746	0.133212	0.128819	0.136639	0.126728
-208	0.219981	0.249028	0.217641	0.234081	0.232388	0.21644	0.146859	0.159227	0.144123	0.156043	0.160105	0.143919	0.252194	0.264889	0.251198	0.251582	0.267445	0.261225	0.175353	0.183067	0.181073	0.173168	0.191399	0.173584	0.233528	0.219638	0.225648	0.223556	0.202328	0.223425	0.138466	0.135029	0.136449	0.127537	0.133736	0.135153	0.194781	0.182913	0.193726	0.190067	0.176122	0.197719	0.119025	0.116333	0.135882	0.113526	0.11994	0.128679
-207	0.225528	0.233311	0.214816	0.239061	0.237026	0.219214	0.148888	0.168441	0.152888	0.14975	0.153061	0.144936	0.253819	0.255916	0.248756	0.259443	0.262958	0.253477	0.169379	0.181528	0.173181	0.170398	0.188058	0.174881	0.223081	0.210848	0.216834	0.224121	0.214797	0.232174	0.151548	0.143288	0.141992	0.135076	0.136288	0.135065	0.198045	0.18385	0.208198	0.195682	0.177815	0.205556	0.131443	0.124339	0.122798	0.119777	0.125233	0.12574
-206	0.22306	0.226994	0.210599	0.229892	0.239497	0.214347	0.152569	0.152016	0.135077	0.148597	0.153448	0.133748	0.256209	0.2599	0.25423	0.256874	0.26395	0.252446	0.173451	0.180757	0.164575	0.154349	0.168005	0.157341	0.231738	0.225551	0.235103	0.229631	0.215417	0.227915	0.132775	0.137871	0.13226	0.137339	0.141963	0.13762	0.203918	0.196421	0.214912	0.202223	0.189754	0.212148	0.124249	0.13029	0.130425	0.137642	0.112977	0.127966
-205	0.214157	0.216466	0.20855	0.230849	0.234232	0.216119	0.152691	0.15673	0.145154	0.158121	0.161704	0.150815	0.26235	0.25664	0.246271	0.248452	0.262827	0.246373	0.167797	0.171303	0.17078	0.163113	0.17944	0.158196	0.226446	0.215423	0.220874	0.215459	0.218663	0.231007	0.130866	0.133325	0.13899	0.13318	0.136975	0.136807	0.198775	0.191871	0.208953	0.202618	0.186822	0.206861	0.127198	0.124988	0.130904	0.128431	0.120405	0.123542
-204	0.228819	0.230013	0.211039	0.22035	0.228392	0.217772	0.149996	0.153137	0.137685	0.146591	0.15439	0.153075	0.250717	0.243448	0.251664	0.25472	0.270157	0.251984	0.164362	0.193693	0.172611	0.178286	0.169407	0.169547	0.237929	0.216755	0.233629	0.225046	0.219631	0.232123	0.144867	0.132263	0.124188	0.134843	0.134161	0.134456	0.200667	0.197072	0.218597	0.20288	0.192873	0.209484	0.126716	0.111656	0.120882	0.11871	0.123124	0.12863
-203	0.213444	0.228774	0.208831	0.220805	0.232069	0.21075	0.157498	0.153619	0.151159	0.167659	0.163595	0.153499	0.236084	0.255127	0.248707	0.252038	0.260882	0.254135	0.170498	0.191425	0.178126	0.174558	0.188945	0.165115	0.229849	0.229177	0.22665	0.230391	0.213131	0.239382	0.14261	0.148381	0.139896	0.135549	0.135975	0.133062	0.215277	0.210125	0.215858	0.21143	0.195347	0.21148	0.121792	0.129752	0.13207	0.131762	0.124522	0.12109
-202	0.223855	0.237484	0.22581	0.233306	0.248618	0.223402	0.157072	0.162398	0.156132	0.140816	0.157667	0.148886	0.261665	0.274744	0.262026	0.268575	0.268374	0.251822	0.180507	0.178177	0.164958	0.164805	0.190167	0.164679	0.229509	0.217129	0.221488	0.228196	0.209028	0.228563	0.153356	0.134788	0.135227	0.145688	0.127159	0.143253	0.202998	0.195582	0.211549	0.196506	0.18004	0.208374	0.127235	0.134869	0.123385	0.115836	0.120434	0.128943
-201	0.219172	0.220953	0.205974	0.225677	0.238651	0.209993	0.145068	0.17463	0.149776	0.151231	0.150759	0.139341	0.252627	0.264997	0.255327	0.259043	0.273097	0.253099	0.170632	0.178211	0.171866	0.166147	0.179551	0.175495	0.234868	0.219958	0.227061	0.229503	0.215676	0.224245	0.149399	0.139373	0.146088	0.131972	0.142426	0.150847	0.207006	0.207963	0.213271	0.207287	0.190823	0.204818	0.13529	0.128361	0.12727	0.129399	0.12645	0.124402
-200	0.228721	0.234562	0.21569	0.23635	0.236348	0.221027	0.155568	0.153487	0.141643	0.156302	0.171476	0.155435	0.262911	0.26775	0.258008	0.260815	0.27769	0.26034	0.180914	0.190767	0.166657	0.178329	0.173232	0.178387	0.23055	0.218294	0.234141	0.23004	0.213271	0.232001	0.138172	0.13781	0.136476	0.142341	0.140222	0.143959	0.21282	0.201054	0.215601	0.216226	0.192989	0.211171	0.130054	0.122831	0.112719	0.12533	0.123898	0.115786
-199	0.220691	0.23063	0.206563	0.217116	0.233057	0.211799	0.169044	0.185644	0.1716	0.172537	0.17931	0.158983	0.245312	0.264341	0.248388	0.252025	0.264805	0.252193	0.190055	0.212483	0.193813	0.184281	0.205307	0.188058	0.229986	0.213833	0.23078	0.229423	0.21162	0.228664	0.1426	0.146482	0.133339	0.144117	0.144803	0.149646	0.200145	0.190536	0.222443	0.203749	0.195451	0.2128	0.133137	0.140615	0.137443	0.13203	0.131575	0.126133
-198	0.223281	0.232722	0.21871	0.224109	0.238266	0.217552	0.162118	0.15721	0.159993	0.167485	0.188579	0.169258	0.258312	0.2649	0.250974	0.25617	0.268864	0.263802	0.190578	0.219491	0.187132	0.188858	0.213894	0.180461	0.243282	0.238938	0.246772	0.249698	0.233134	0.244694	0.14639	0.143638	0.140788	0.150492	0.143866	0.151687	0.225071	0.212865	0.229177	0.213103	0.203573	0.226931	0.126863	0.129494	0.130313	0.134759	0.12386	0.126874
-197	0.224086	0.239595	0.206875	0.22404	0.246445	0.220409	0.157307	0.165008	0.153408	0.14178	0.167349	0.157963	0.249186	0.264415	0.249208	0.264578	0.268815	0.250078	0.173643	0.190169	0.181343	0.182003	0.186486	0.178412	0.236488	0.216092	0.22944	0.231719	0.216379	0.228272	0.136756	0.126357	0.127356	0.140548	0.133672	0.134801	0.200994	0.193261	0.213109	0.209092	0.1929	0.211135	0.127506	0.132332	0.122629	0.13572	0.119128	0.128817
-196	0.212724	0.244154	0.200862	0.229273	0.229659	0.210583	0.163911	0.162879	0.152	0.164815	0.16533	0.156778	0.265222	0.271954	0.253306	0.265993	0.2656	0.256454	0.171523	0.210733	0.183392	0.192183	0.189251	0.186955	0.240374	0.23148	0.232662	0.244823	0.223234	0.227514	0.145616	0.143419	0.136957	0.136229	0.131841	0.139575	0.214317	0.216045	0.211132	0.213417	0.195016	0.208227	0.122228	0.117181	0.128406	0.127954	0.135351	0.131065
-195	0.210004	0.228048	0.196677	0.21625	0.231171	0.209826	0.160334	0.16367	0.149568	0.159478	0.156642	0.158036	0.249906	0.258635	0.246959	0.244016	0.269863	0.248797	0.176581	0.188659	0.180911	0.183829	0.184073	0.167098	0.242968	0.229985	0.236193	0.238416	0.226056	0.229737	0.145898	0.132434	0.147762	0.139371	0.137597	0.136391	0.209531	0.204273	0.223517	0.211065	0.196809	0.219665	0.127422	0.122437	0.127766	0.131932	0.132817	0.130088
-194	0.216637	0.23189	0.207896	0.217097	0.238894	0.211523	0.153913	0.168591	0.160207	0.158645	0.152422	0.161367	0.256258	0.265808	0.25011	0.246946	0.281258	0.2561	0.189356	0.198952	0.176219	0.177041	0.194015	0.186951	0.231851	0.226261	0.227773	0.218778	0.226032	0.226089	0.145818	0.157819	0.151177	0.15159	0.139929	0.144583	0.206297	0.191526	0.218149	0.208175	0.200896	0.211735	0.138252	0.13411	0.132172	0.134217	0.136205	0.140644
-193	0.213457	0.233128	0.207933	0.224446	0.244861	0.218504	0.176578	0.175374	0.147809	0.171322	0.171993	0.161309	0.251784	0.264825	0.237968	0.262012	0.268588	0.248932	0.195495	0.195681	0.190636	0.198355	0.209176	0.189349	0.232729	0.225089	0.231787	0.21679	0.21718	0.224211	0.130728	0.145245	0.140521	0.132777	0.127766	0.129779	0.214268	0.200616	0.214342	0.201185	0.198107	0.215379	0.128577	0.12137	0.134212	0.131529	0.110932	0.120075
-192	0.201791	0.213287	0.189069	0.204169	0.223053	0.198019	0.152032	0.167012	0.157241	0.154714	0.170993	0.153834	0.245168	0.257945	0.235001	0.250278	0.248241	0.236488	0.187763	0.206074	0.172065	0.192899	0.213618	0.18743	0.227908	0.230112	0.228434	0.229091	0.218278	0.225445	0.136331	0.13001	0.138778	0.128811	0.124761	0.135733	0.216885	0.211305	0.215639	0.212362	0.195865	0.208522	0.13158	0.129038	0.127947	0.116118	0.120074	0.122186
-191	0.216898	0.228946	0.2076	0.206781	0.23966	0.201519	0.14414	0.16402	0.147676	0.17376	0.159858	0.151332	0.246529	0.260449	0.246057	0.263616	0.261991	0.250723	0.188937	0.202722	0.183489	0.178242	0.197987	0.180214	0.254118	0.241443	0.250141	0.245285	0.240689	0.235429	0.148108	0.146783	0.152742	0.149192	0.138599	0.148184	0.222046	0.21376	0.229283	0.221223	0.221443	0.225357	0.135198	0.145654	0.137349	0.141026	0.130834	0.135184
-190	0.207725	0.220522	0.204876	0.211908	0.232296	0.201426	0.172958	0.177597	0.160169	0.16431	0.171024	0.168036	0.24489	0.263237	0.239544	0.253539	0.264464	0.248525	0.207573	0.217411	0.187357	0.204857	0.2193	0.188206	0.255146	0.250773	0.253529	0.254839	0.241127	0.246475	0.138823	0.140744	0.147536	0.144495	0.142598	0.140871	0.229434	0.219311	0.234362	0.226311	0.219151	0.229085	0.128804	0.123188	0.145951	0.13207	0.124688	0.14701
-189	0.20064	0.207793	0.194713	0.213606	0.224549	0.201072	0.158262	0.168914	0.148176	0.163805	0.170355	0.149012	0.237861	0.250042	0.2353	0.237201	0.260111	0.231989	0.182296	0.199712	0.187961	0.180086	0.192927	0.179103	0.228317	0.241264	0.236409	0.241576	0.230975	0.240683	0.147277	0.143537	0.142541	0.14714	0.147651	0.149401	0.221376	0.216768	0.23332	0.219788	0.205277	0.217701	0.129283	0.137265	0.153177	0.140392	0.12353	0.140974
-188	0.205223	0.213386	0.192679	0.212552	0.233276	0.197168	0.15954	0.169289	0.163611	0.163385	0.173	0.167393	0.238215	0.250097	0.2353	0.240619	0.258824	0.237066	0.196817	0.22062	0.195727	0.200635	0.225152	0.183084	0.238645	0.235231	0.23241	0.23567	0.238505	0.248912	0.144532	0.146487	0.14279	0.151028	0.147052	0.131444	0.222194	0.224703	0.224316	0.22545	0.216472	0.218637	0.13789	0.146986	0.132083	0.132717	0.133838	0.138682
-187	0.203537	0.214079	0.191468	0.199281	0.21795	0.19513	0.153757	0.168803	0.161826	0.165807	0.1642	0.153095	0.235657	0.261785	0.235463	0.237379	0.257588	0.235356	0.17691	0.189019	0.187332	0.17201	0.182718	0.181445	0.248503	0.245023	0.249644	0.240431	0.252768	0.246888	0.145493	0.145014	0.148015	0.154512	0.142688	0.158104	0.224589	0.230264	0.243093	0.236267	0.215758	0.238182	0.147662	0.133073	0.145937	0.143403	0.146811	0.133753
-186	0.191413	0.209707	0.185969	0.208613	0.218154	0.185711	0.154207	0.170795	0.159671	0.161589	0.171488	0.153066	0.232921	0.254387	0.237538	0.243756	0.245443	0.21931	0.168159	0.20084	0.199037	0.182696	0.19209	0.187765	0.241263	0.231371	0.235627	0.236349	0.227419	0.241961	0.151404	0.147553	0.153375	0.146493	0.152847	0.14061	0.214746	0.214901	0.222837	0.218596	0.205561	0.218857	0.150048	0.13752	0.145163	0.144562	0.137745	0.146454
-185	0.197489	0.212579	0.185955	0.198011	0.213963	0.184771	0.177539	0.181065	0.165507	0.17394	0.183791	0.168445	0.226748	0.23995	0.227739	0.227148	0.249901	0.237974	0.192343	0.202897	0.195501	0.181012	0.215778	0.176256	0.252737	0.238397	0.238012	0.24478	0.241272	0.243801	0.154786	0.14772	0.154219	0.128942	0.143087	0.140435	0.225324	0.222703	0.22912	0.22642	0.210545	0.231759	0.136739	0.151524	0.137488	0.137706	0.135309	0.123646
-184	0.192284	0.202658	0.185629	0.207937	0.216895	0.195327	0.162771	0.186213	0.160474	0.172512	0.182537	0.169558	0.221586	0.246293	0.227581	0.245711	0.256666	0.227007	0.187187	0.21297	0.18544	0.186267	0.203467	0.192924	0.250328	0.24226	0.25143	0.240127	0.234357	0.240547	0.155817	0.151457	0.147095	0.148131	0.144538	0.154944	0.231846	0.234044	0.235902	0.222011	0.223998	0.235264	0.144139	0.1411	0.138574	0.142436	0.147809	0.138524
-183	0.196808	0.210605	0.187269	0.21694	0.226753	0.19592	0.166055	0.168952	0.158608	0.163503	0.161888	0.16203	0.236066	0.245597	0.224722	0.236714	0.259863	0.248581	0.194521	0.204523	0.190284	0.197687	0.183827	0.189025	0.246937	0.244843	0.240315	0.243814	0.240655	0.236982	0.157749	0.131935	0.14946	0.155102	0.135913	0.146952	0.230325	0.219801	0.231391	0.227038	0.218303	0.2334	0.141709	0.152543	0.133831	0.144274	0.128066	0.151647
-182	0.198948	0.201975	0.190672	0.206818	0.214874	0.182767	0.177714	0.170526	0.160963	0.163665	0.176162	0.164775	0.229073	0.235434	0.220924	0.226335	0.248814	0.225737	0.193675	0.221353	0.191064	0.189543	0.211666	0.181079	0.246862	0.249159	0.248633	0.24888	0.248102	0.241375	0.147394	0.154166	0.152525	0.141393	0.148809	0.150142	0.237474	0.228998	0.234497	0.233671	0.220817	0.230024	0.141722	0.149538	0.135573	0.13896	0.141947	0.128614
-181	0.196848	0.215868	0.186387	0.212085	0.224055	0.200208	0.168895	0.17368	0.161129	0.158165	0.184686	0.159474	0.241145	0.250246	0.231565	0.235159	0.255321	0.234348	0.196971	0.21083	0.191162	0.201196	0.209518	0.199337	0.258681	0.248334	0.239576	0.249449	0.24771	0.234715	0.144284	0.146622	0.14792	0.14927	0.145261	0.151793	0.234115	0.234412	0.235865	0.232127	0.222714	0.238338	0.143397	0.145694	0.140345	0.151738	0.142516	0.13961
-180	0.201796	0.205382	0.179204	0.201903	0.220232	0.179519	0.185337	0.175069	0.145966	0.178983	0.176426	0.162464	0.230493	0.237765	0.219919	0.231252	0.247885	0.229501	0.202079	0.198643	0.184823	0.188468	0.212836	0.180506	0.249025	0.246704	0.24085	0.248804	0.244128	0.23391	0.141859	0.154135	0.136711	0.147562	0.150477	0.150314	0.225358	0.218419	0.227997	0.227108	0.208098	0.224661	0.144161	0.140682	0.145541	0.13792	0.132557	0.126138
-179	0.195895	0.204769	0.185416	0.202054	0.217766	0.184411	0.178841	0.175002	0.165263	0.17465	0.168707	0.161315	0.222889	0.251677	0.224682	0.233044	0.253764	0.228349	0.185979	0.204222	0.181181	0.185143	0.194146	0.185406	0.242392	0.242272	0.239403	0.242818	0.24317	0.236875	0.158074	0.161825	0.161252	0.148603	0.151734	0.154536	0.219579	0.220743	0.226736	0.230241	0.22034	0.227111	0.154317	0.147538	0.142951	0.16648	0.151561	0.136811
-178	0.190705	0.197024	0.184746	0.199614	0.199998	0.184239	0.173152	0.192589	0.167175	0.170004	0.182051	0.174594	0.233135	0.237398	0.221178	0.230556	0.252528	0.228678	0.197733	0.209492	0.189103	0.195244	0.214233	0.199833	0.243513	0.236877	0.233799	0.244539	0.242331	0.22978	0.152122	0.160218	0.160694	0.169069	0.166884	0.154548	0.224577	0.225231	0.22563	0.225226	0.218379	0.21434	0.153916	0.152853	0.160611	0.152294	0.153481	0.165197
-177	0.190756	0.213436	0.173937	0.190419	0.216776	0.184397	0.170672	0.163094	0.1645	0.165483	0.178104	0.165276	0.226194	0.240181	0.215651	0.237608	0.242151	0.221079	0.179807	0.206424	0.199699	0.179057	0.217146	0.176827	0.229266	0.234728	0.223977	0.242589	0.239156	0.228891	0.137945	0.157554	0.143813	0.149381	0.142815	0.132738	0.221768	0.208905	0.218862	0.214123	0.22018	0.207957	0.145373	0.147287	0.135251	0.146688	0.139881	0.149577
-176	0.191323	0.203867	0.185402	0.201088	0.219887	0.198234	0.175798	0.192435	0.167625	0.172202	0.178388	0.158537	0.23194	0.253143	0.228251	0.24526	0.252272	0.243248	0.206805	0.226345	0.199218	0.200138	0.203434	0.203292	0.247521	0.245168	0.242477	0.24496	0.248633	0.238828	0.141089	0.142386	0.143472	0.139821	0.14502	0.137309	0.230209	0.238805	0.221839	0.227874	0.230469	0.22639	0.14479	0.138232	0.1412	0.13262	0.1385	0.13673
-175	0.183889	0.197134	0.163883	0.189134	0.193458	0.178048	0.192926	0.195209	0.169059	0.172492	0.18574	0.172905	0.21659	0.239962	0.217891	0.222861	0.229291	0.220317	0.190813	0.225923	0.19491	0.195265	0.209901	0.208811	0.242858	0.238303	0.236632	0.246096	0.241006	0.235697	0.171512	0.163679	0.157598	0.159911	0.147648	0.156703	0.230015	0.22855	0.228112	0.222994	0.234035	0.232345	0.146278	0.14984	0.165278	0.151849	0.151275	0.149308
-174	0.192906	0.197468	0.172209	0.190959	0.202135	0.184362	0.192063	0.192224	0.180572	0.190712	0.200604	0.181132	0.229434	0.24761	0.211681	0.22346	0.242971	0.22843	0.203494	0.222963	0.219193	0.224235	0.219692	0.212484	0.255091	0.249955	0.235499	0.245502	0.250733	0.232513	0.149868	0.13472	0.147348	0.136543	0.143033	0.136422	0.234939	0.228215	0.22727	0.226151	0.213544	0.222836	0.143241	0.142759	0.13922	0.144221	0.141213	0.135662
-173	0.18885	0.208973	0.175058	0.20189	0.212995	0.183341	0.176341	0.19414	0.174505	0.19108	0.189337	0.184472	0.235512	0.249565	0.235233	0.230618	0.255742	0.223574	0.209377	0.223899	0.192483	0.194066	0.233099	0.201732	0.235268	0.235958	0.22392	0.236211	0.248666	0.224658	0.147851	0.149108	0.150814	0.146853	0.16421	0.144055	0.230357	0.223724	0.224676	0.221427	0.222884	0.222469	0.141727	0.144342	0.141837	0.145283	0.149705	0.140892
-172	0.190274	0.207318	0.178311	0.18728	0.206998	0.187039	0.187734	0.20058	0.17436	0.187228	0.179491	0.180355	0.216069	0.237197	0.226502	0.226523	0.237233	0.227166	0.213328	0.224332	0.211698	0.204433	0.23118	0.21046	0.241169	0.233592	0.232531	0.2384	0.239382	0.220732	0.148264	0.162132	0.155085	0.154706	0.144172	0.156069	0.236992	0.227964	0.236209	0.227337	0.228622	0.222208	0.14143	0.151941	0.160444	0.156901	0.165786	0.138671
-171	0.186539	0.20149	0.173411	0.189892	0.208284	0.179953	0.177078	0.18497	0.162361	0.167208	0.186956	0.157735	0.216892	0.235237	0.216841	0.225152	0.24574	0.217261	0.195251	0.219811	0.208811	0.200745	0.230006	0.19872	0.255515	0.253623	0.244007	0.249034	0.265791	0.243578	0.156689	0.155196	0.151296	0.156048	0.157421	0.142383	0.24184	0.250487	0.238449	0.241154	0.243632	0.242273	0.157992	0.152313	0.142274	0.151893	0.140041	0.14671
-170	0.182821	0.202969	0.170569	0.189077	0.210458	0.172216	0.183974	0.182547	0.17979	0.178646	0.203177	0.178459	0.216268	0.233225	0.214465	0.225205	0.24479	0.216803	0.214011	0.21657	0.212577	0.208516	0.239674	0.218889	0.244931	0.265389	0.236426	0.244807	0.261809	0.239813	0.145483	0.142429	0.145478	0.149262	0.150751	0.141493	0.241411	0.237502	0.239334	0.233667	0.238494	0.230934	0.140294	0.153888	0.136007	0.151713	0.144996	0.144706
-169	0.18496	0.196642	0.170465	0.191474	0.200559	0.182992	0.193385	0.197072	0.176392	0.194534	0.198976	0.176138	0.214673	0.228778	0.213598	0.223737	0.238117	0.218085	0.214607	0.224713	0.210966	0.217141	0.242767	0.203978	0.237238	0.240965	0.236602	0.2412	0.23858	0.224115	0.146096	0.137847	0.137535	0.146739	0.14907	0.139286	0.226982	0.224103	0.231213	0.231805	0.219635	0.222026	0.14497	0.147755	0.139402	0.154802	0.144238	0.154717
-168	0.18172	0.191173	0.17067	0.187737	0.199521	0.170991	0.173443	0.209046	0.183105	0.18687	0.207606	0.189164	0.212878	0.220355	0.211256	0.216819	0.234224	0.214383	0.218742	0.232207	0.21317	0.220902	0.242322	0.21604	0.241836	0.239259	0.232069	0.238185	0.245925	0.229697	0.137784	0.145822	0.132418	0.154339	0.152554	0.142924	0.231064	0.237245	0.231121	0.219693	0.227126	0.223818	0.129133	0.141988	0.138937	0.136403	0.146335	0.127074
-167	0.192609	0.198348	0.167866	0.186449	0.197315	0.18168	0.184907	0.193855	0.174669	0.191596	0.19563	0.192087	0.213713	0.222073	0.205586	0.216267	0.234671	0.221	0.207546	0.22943	0.211336	0.211627	0.246116	0.210192	0.256663	0.258511	0.235192	0.242459	0.249103	0.237455	0.154992	0.142586	0.144917	0.151349	0.152045	0.134463	0.238416	0.242267	0.230906	0.234503	0.229794	0.224558	0.144989	0.156396	0.146918	0.144601	0.154407	0.150488
-166	0.176915	0.192613	0.162278	0.17948	0.18968	0.17274	0.188947	0.21102	0.192774	0.202562	0.202922	0.18439	0.205213	0.220495	0.212417	0.216269	0.231138	0.214549	0.22037	0.247691	0.22791	0.22759	0.249955	0.222041	0.238909	0.244058	0.232822	0.240041	0.256307	0.227851	0.159737	0.156589	0.142754	0.14395	0.133607	0.129786	0.233018	0.239731	0.229326	0.23003	0.239966	0.222904	0.142416	0.149022	0.141762	0.127645	0.140679	0.138055
-165	0.174436	0.187765	0.163923	0.180709	0.194451	0.167912	0.200956	0.211427	0.19431	0.202074	0.21332	0.193531	0.21206	0.213572	0.212347	0.213083	0.22539	0.198185	0.225462	0.240714	0.220454	0.211971	0.236741	0.221201	0.254119	0.244402	0.231367	0.243084	0.2524	0.228177	0.146682	0.142683	0.140799	0.156633	0.144299	0.142234	0.240604	0.236747	0.236338	0.236554	0.244464	0.238188	0.138659	0.13414	0.149538	0.139674	0.142437	0.142383
-164	0.175052	0.18729	0.154366	0.179941	0.188069	0.168078	0.180425	0.203642	0.177975	0.183954	0.199743	0.185155	0.208611	0.222782	0.202571	0.20568	0.236347	0.20731	0.224948	0.247363	0.217284	0.206206	0.242979	0.234971	0.235305	0.249411	0.227682	0.239996	0.24205	0.224223	0.138761	0.141652	0.148601	0.133981	0.162099	0.138286	0.23478	0.224086	0.223118	0.229715	0.227276	0.225084	0.137695	0.149088	0.144659	0.141774	0.13787	0.146489
-163	0.1674	0.184288	0.161384	0.177636	0.185029	0.175798	0.176499	0.214943	0.192104	0.190312	0.196566	0.169104	0.208794	0.211316	0.212794	0.203374	0.217237	0.211975	0.220446	0.246083	0.220993	0.215275	0.245504	0.221344	0.233534	0.25073	0.236146	0.244177	0.240369	0.230519	0.137861	0.148511	0.138508	0.149143	0.149573	0.13446	0.239338	0.2288	0.227881	0.237348	0.233998	0.230911	0.135374	0.14305	0.144991	0.148617	0.145512	0.14072
-162	0.189605	0.196864	0.170526	0.189013	0.200358	0.181539	0.206492	0.211357	0.202223	0.193713	0.209344	0.192559	0.221303	0.238731	0.211772	0.220572	0.24225	0.23335	0.229035	0.264628	0.229721	0.227213	0.258915	0.231795	0.230922	0.243782	0.221492	0.230402	0.237615	0.214058	0.161888	0.145223	0.146798	0.145398	0.148303	0.134581	0.226123	0.226277	0.226116	0.218881	0.219392	0.221535	0.149315	0.144613	0.141861	0.139867	0.143291	0.145799
-161	0.165109	0.172246	0.165332	0.170541	0.182041	0.168525	0.209325	0.218706	0.185615	0.18729	0.225068	0.18925	0.205646	0.212467	0.206469	0.201212	0.222765	0.19933	0.232364	0.251933	0.226023	0.234243	0.248043	0.229236	0.232146	0.248558	0.226809	0.224341	0.24645	0.22406	0.153988	0.158118	0.145999	0.151295	0.146632	0.145561	0.235449	0.240647	0.228495	0.228797	0.23024	0.218471	0.14819	0.146512	0.148123	0.146791	0.150185	0.142263
-160	0.182626	0.182961	0.162053	0.177424	0.19229	0.175358	0.206605	0.218581	0.193465	0.21883	0.229687	0.194536	0.207339	0.216067	0.202846	0.202945	0.224347	0.205409	0.23334	0.266876	0.244499	0.233503	0.277214	0.231814	0.234425	0.239235	0.228292	0.229763	0.240473	0.215843	0.14961	0.152665	0.146442	0.137457	0.152699	0.140077	0.231022	0.236152	0.224488	0.225945	0.227656	0.223803	0.134252	0.139847	0.142694	0.149924	0.138847	0.142851
-159	0.164247	0.181892	0.163582	0.176439	0.180481	0.169143	0.216934	0.220535	0.187189	0.190747	0.213675	0.188099	0.206939	0.210816	0.194496	0.20091	0.212617	0.199733	0.239468	0.248126	0.240624	0.23249	0.245804	0.244811	0.235616	0.2399	0.218498	0.221539	0.236066	0.209409	0.14989	0.159516	0.155699	0.149432	0.14823	0.156592	0.224988	0.227797	0.218555	0.218357	0.222631	0.208663	0.146581	0.143568	0.16504	0.14606	0.153395	0.16008
-158	0.171847	0.176294	0.157302	0.167466	0.177931	0.165106	0.185634	0.227899	0.186262	0.202188	0.210592	0.202889	0.204037	0.214845	0.193906	0.19336	0.214922	0.199956	0.233555	0.255643	0.226328	0.235498	0.25051	0.226322	0.241545	0.252417	0.228285	0.244982	0.243739	0.226122	0.136499	0.154167	0.151003	0.145839	0.15016	0.133887	0.222508	0.241083	0.230676	0.232501	0.243176	0.228969	0.141141	0.152698	0.147417	0.148384	0.144781	0.142262
-157	0.166364	0.189665	0.163611	0.169809	0.182083	0.160766	0.220139	0.227424	0.201108	0.211469	0.237334	0.202184	0.198987	0.214723	0.201041	0.211015	0.228701	0.195785	0.244523	0.266118	0.239109	0.257173	0.284585	0.262203	0.241785	0.245039	0.226116	0.230719	0.244265	0.224314	0.160956	0.152165	0.146125	0.160705	0.147176	0.1578	0.235378	0.235078	0.219242	0.235287	0.239414	0.221669	0.163461	0.152401	0.164758	0.162135	0.164029	0.159878
-156	0.173285	0.180569	0.156042	0.168242	0.186527	0.160964	0.193837	0.1965	0.17739	0.204432	0.214637	0.175403	0.200539	0.211784	0.206227	0.201923	0.216914	0.197242	0.212407	0.248502	0.219935	0.228019	0.255874	0.21296	0.226547	0.231842	0.210978	0.223737	0.232023	0.227066	0.135492	0.129133	0.134215	0.143809	0.135985	0.13738	0.219178	0.227413	0.220782	0.218188	0.22167	0.221359	0.141342	0.129386	0.146976	0.147083	0.143142	0.136788
-155	0.169112	0.181406	0.155476	0.167165	0.177483	0.160232	0.202082	0.209657	0.193314	0.206052	0.219573	0.20821	0.19962	0.209558	0.189788	0.20261	0.218611	0.19639	0.23567	0.263855	0.235666	0.234261	0.244648	0.221216	0.231864	0.23637	0.209185	0.233933	0.223597	0.213562	0.14818	0.151547	0.15447	0.147695	0.15676	0.153683	0.224864	0.232063	0.219915	0.221168	0.225548	0.213974	0.157146	0.150388	0.148561	0.142208	0.159747	0.162603
-154	0.170512	0.179747	0.16176	0.168741	0.183153	0.156686	0.226909	0.235752	0.205808	0.219256	0.235758	0.204875	0.200529	0.209352	0.204336	0.202568	0.226144	0.203239	0.235524	0.279483	0.249481	0.246686	0.272273	0.256107	0.231122	0.235196	0.215625	0.223844	0.242328	0.226722	0.140356	0.157921	0.147273	0.148037	0.138318	0.153473	0.22451	0.238686	0.21636	0.21533	0.222916	0.212258	0.140297	0.142717	0.153286	0.148479	0.155386	0.148238
-153	0.167272	0.179756	0.157937	0.176147	0.176469	0.165282	0.210816	0.231286	0.207673	0.212843	0.223421	0.199726	0.194482	0.2089	0.197165	0.200528	0.212436	0.207069	0.23984	0.278376	0.24036	0.253931	0.254092	0.242631	0.233951	0.241551	0.216058	0.227685	0.244157	0.210946	0.159124	0.156191	0.165424	0.151041	0.148869	0.149676	0.232562	0.239884	0.222755	0.2198	0.228128	0.223631	0.158162	0.165071	0.165994	0.156118	0.170062	0.168704
-152	0.173827	0.18626	0.162612	0.176443	0.187397	0.171884	0.221125	0.240435	0.205758	0.216637	0.224578	0.207351	0.208507	0.212062	0.203792	0.20633	0.227327	0.213661	0.259841	0.272343	0.229292	0.243391	0.263183	0.237734	0.218673	0.232157	0.21579	0.232378	0.232677	0.211211	0.139775	0.157947	0.159861	0.147035	0.146667	0.142829	0.226047	0.229726	0.23035	0.219434	0.224801	0.216781	0.153816	0.146748	0.152385	0.152281	0.153891	0.159373
-151	0.16915	0.178351	0.162888	0.169625	0.187132	0.160741	0.230544	0.238042	0.196849	0.22089	0.239811	0.212732	0.204552	0.222205	0.199943	0.19719	0.218921	0.193528	0.264072	0.285243	0.256736	0.246776	0.267326	0.2427	0.230181	0.230068	0.209926	0.218098	0.231885	0.213812	0.144943	0.142696	0.14783	0.15039	0.150457	0.156328	0.209694	0.213324	0.21939	0.228153	0.233054	0.216976	0.157314	0.162014	0.156645	0.150641	0.157367	0.157664
-150	0.16283	0.179329	0.152948	0.167987	0.181481	0.160918	0.216384	0.223358	0.201489	0.223676	0.231215	0.209527	0.198744	0.212746	0.202359	0.201768	0.212782	0.203976	0.248676	0.266898	0.250949	0.245032	0.263054	0.240173	0.223095	0.221435	0.206447	0.215827	0.231799	0.21765	0.176048	0.155019	0.164566	0.158591	0.170489	0.161633	0.208662	0.230442	0.222688	0.217029	0.229573	0.21207	0.162764	0.171642	0.172059	0.163881	0.171293	0.167436
-149	0.162868	0.169646	0.15285	0.164701	0.174401	0.155065	0.213214	0.242531	0.202627	0.214929	0.229042	0.204184	0.194633	0.216492	0.190092	0.200946	0.218286	0.193653	0.262026	0.273363	0.240435	0.24741	0.29047	0.247652	0.211221	0.223868	0.203125	0.211975	0.220051	0.209984	0.13939	0.154266	0.167365	0.158043	0.149135	0.15482	0.210482	0.210727	0.212762	0.211613	0.228666	0.210043	0.159056	0.161051	0.164042	0.162339	0.172352	0.153269
-148	0.166754	0.18	0.153122	0.175864	0.173527	0.159977	0.22468	0.216591	0.200532	0.217455	0.226327	0.20161	0.201193	0.209216	0.199933	0.200316	0.222189	0.196728	0.252178	0.300165	0.256418	0.249908	0.264127	0.24209	0.204382	0.213452	0.201896	0.217839	0.210909	0.199935	0.142898	0.146928	0.149355	0.141917	0.161817	0.161393	0.214703	0.227495	0.21361	0.208445	0.220968	0.210181	0.156465	0.152387	0.162055	0.164255	0.156896	0.161121
-147	0.169197	0.168949	0.159079	0.170606	0.165703	0.156333	0.224223	0.234287	0.198206	0.220281	0.232836	0.19795	0.196031	0.198544	0.188582	0.187018	0.211819	0.193552	0.249885	0.288634	0.250291	0.265428	0.282559	0.252839	0.212117	0.221124	0.207747	0.209959	0.220722	0.20185	0.162904	0.150829	0.153203	0.164735	0.16398	0.152691	0.209088	0.214908	0.223744	0.213645	0.213954	0.212916	0.169019	0.161358	0.152664	0.165431	0.160641	0.160687
-146	0.16927	0.16782	0.155342	0.170985	0.176866	0.155517	0.232756	0.23451	0.209801	0.214345	0.232931	0.21511	0.193357	0.209571	0.194559	0.187785	0.216806	0.198553	0.256612	0.298812	0.253716	0.261899	0.296259	0.263807	0.210857	0.221404	0.20195	0.217651	0.229249	0.216228	0.147308	0.155781	0.144414	0.157159	0.148258	0.149324	0.22388	0.223691	0.20949	0.215383	0.233732	0.207377	0.15867	0.160238	0.158437	0.150737	0.160443	0.155938
-145	0.169192	0.183566	0.154097	0.173441	0.175067	0.157296	0.221346	0.257548	0.213217	0.247135	0.244226	0.220171	0.195199	0.212248	0.201824	0.199861	0.217319	0.202991	0.267728	0.281859	0.27131	0.268507	0.28697	0.262794	0.203945	0.215599	0.198649	0.210635	0.217654	0.196232	0.155847	0.171282	0.152802	0.166148	0.170451	0.166804	0.206537	0.219817	0.209053	0.214073	0.219713	0.212611	0.15848	0.174959	0.155359	0.165041	0.174484	0.168392
-144	0.15599	0.174712	0.155357	0.161357	0.177589	0.146482	0.231242	0.254727	0.22115	0.235724	0.24646	0.221488	0.194811	0.211937	0.192678	0.195915	0.202284	0.192443	0.255988	0.284162	0.263415	0.260265	0.285092	0.266555	0.197397	0.205975	0.20008	0.215367	0.23042	0.202781	0.172618	0.151738	0.160462	0.169694	0.175775	0.163228	0.199623	0.20373	0.203797	0.204247	0.207776	0.199935	0.168544	0.156301	0.165561	0.161173	0.177401	0.175387
-143	0.171117	0.177656	0.157186	0.165406	0.17002	0.153163	0.225546	0.246801	0.211481	0.220634	0.233863	0.221796	0.206788	0.216417	0.189795	0.198207	0.20997	0.193475	0.25899	0.285135	0.252827	0.243119	0.272255	0.257246	0.201533	0.211144	0.193151	0.206611	0.210409	0.192174	0.154302	0.154126	0.155668	0.154746	0.157153	0.147339	0.211637	0.212588	0.209746	0.203623	0.209158	0.20259	0.157852	0.159479	0.165109	0.158885	0.175317	0.161113
-142	0.164852	0.181205	0.159125	0.175588	0.185173	0.163801	0.229303	0.239955	0.211346	0.22923	0.240229	0.209239	0.209134	0.224269	0.203755	0.206813	0.226647	0.200827	0.249309	0.28097	0.245515	0.266867	0.279782	0.260509	0.179858	0.200278	0.181884	0.200606	0.198615	0.194404	0.148747	0.167566	0.149473	0.151637	0.16553	0.158247	0.195102	0.193251	0.203332	0.195635	0.200006	0.20207	0.159235	0.168062	0.17257	0.165655	0.165457	0.159834
-141	0.168279	0.18246	0.149685	0.164806	0.187926	0.157629	0.230356	0.254573	0.218317	0.224159	0.252353	0.222219	0.191301	0.215581	0.189321	0.198665	0.21251	0.205049	0.273905	0.286305	0.25224	0.261526	0.274157	0.248211	0.200122	0.198659	0.181458	0.190842	0.201054	0.184575	0.146713	0.145059	0.1521	0.14894	0.165852	0.1485	0.200999	0.204012	0.196151	0.193776	0.20049	0.188177	0.160686	0.155946	0.165241	0.167787	0.171844	0.158392
-140	0.157966	0.169292	0.15065	0.17001	0.161537	0.149028	0.234997	0.237233	0.203737	0.206334	0.230112	0.212759	0.188775	0.198513	0.187913	0.189937	0.201864	0.189433	0.267638	0.275936	0.257934	0.252733	0.278222	0.270271	0.193057	0.199711	0.185397	0.195432	0.192805	0.184615	0.150504	0.163003	0.149007	0.163478	0.174651	0.160053	0.190379	0.213574	0.19228	0.199469	0.215028	0.19431	0.164808	0.178143	0.17619	0.166351	0.180877	0.180369
-139	0.156498	0.16664	0.158043	0.170835	0.168663	0.149293	0.212116	0.234979	0.211222	0.256083	0.226501	0.223947	0.193117	0.201045	0.190647	0.201424	0.198013	0.194015	0.263699	0.275339	0.268592	0.260266	0.278841	0.261337	0.183616	0.192041	0.173415	0.173646	0.198548	0.188042	0.141661	0.16615	0.147543	0.149649	0.146964	0.161646	0.183037	0.193406	0.193515	0.18334	0.193046	0.195925	0.172401	0.16377	0.160785	0.160359	0.16386	0.161714
-138	0.159022	0.171007	0.150771	0.162736	0.167961	0.142983	0.234132	0.238185	0.212456	0.231034	0.238797	0.215825	0.177601	0.197527	0.18702	0.191905	0.193059	0.185553	0.277403	0.28998	0.255726	0.261335	0.305501	0.274222	0.182607	0.18918	0.174163	0.184248	0.18787	0.181766	0.173547	0.171212	0.158611	0.168824	0.166694	0.161114	0.180949	0.196106	0.183039	0.189031	0.196847	0.179857	0.177989	0.182417	0.17716	0.180816	0.194823	0.175004
-137	0.154155	0.15783	0.144502	0.15631	0.168959	0.143959	0.242192	0.24269	0.190073	0.209697	0.238532	0.219343	0.186063	0.209798	0.182949	0.18896	0.201082	0.191609	0.268945	0.276365	0.248564	0.242648	0.267111	0.248835	0.18845	0.190479	0.179777	0.194061	0.197214	0.182623	0.146236	0.1689	0.163098	0.152477	0.151812	0.164227	0.187862	0.194918	0.187434	0.189998	0.207425	0.187365	0.167094	0.177909	0.170665	0.182095	0.17364	0.167869
-136	0.176908	0.182068	0.167241	0.170324	0.179822	0.167185	0.240557	0.259924	0.232228	0.21399	0.245324	0.227146	0.194306	0.219492	0.200071	0.201221	0.214647	0.195785	0.268477	0.287667	0.267222	0.281363	0.305852	0.291836	0.183093	0.192538	0.178453	0.18762	0.193188	0.181059	0.157648	0.166156	0.147247	0.156263	0.1516	0.1519	0.196277	0.196184	0.187103	0.186395	0.187755	0.19324	0.164787	0.175426	0.17095	0.159371	0.16944	0.173483
-135	0.157132	0.178593	0.158699	0.166579	0.16729	0.151748	0.221406	0.233839	0.209951	0.22857	0.244502	0.220766	0.195745	0.216698	0.197303	0.206982	0.211773	0.203557	0.278722	0.285697	0.24693	0.271631	0.279376	0.258911	0.177732	0.192885	0.170954	0.185943	0.188534	0.180759	0.153643	0.155704	0.155624	0.162705	0.165517	0.150583	0.191018	0.193112	0.182813	0.18678	0.197636	0.188141	0.162184	0.176817	0.166457	0.172531	0.173739	0.175127
-134	0.17178	0.172692	0.151947	0.1737	0.176829	0.16119	0.220953	0.234367	0.214267	0.219568	0.241908	0.216677	0.210753	0.225908	0.194066	0.198693	0.215333	0.192082	0.258307	0.277309	0.265241	0.255351	0.274195	0.259473	0.175154	0.181066	0.172319	0.184172	0.19229	0.174989	0.160767	0.161023	0.159541	0.158501	0.157863	0.160333	0.184549	0.205206	0.182315	0.187286	0.195874	0.184447	0.175516	0.181522	0.171586	0.174413	0.175916	0.148527
-133	0.17653	0.165506	0.154031	0.160048	0.173872	0.155547	0.234216	0.26126	0.233335	0.240553	0.270733	0.2276	0.203274	0.210607	0.194214	0.200826	0.204158	0.202864	0.289114	0.336282	0.287161	0.300148	0.312936	0.280819	0.173165	0.179898	0.171047	0.178275	0.184697	0.166034	0.158372	0.16762	0.164395	0.17054	0.168397	0.160628	0.181785	0.184715	0.184714	0.179468	0.190744	0.18476	0.164829	0.185023	0.184111	0.184877	0.18893	0.17376
-132	0.162462	0.184612	0.144529	0.163466	0.175956	0.154365	0.239199	0.239666	0.215081	0.253544	0.254128	0.230995	0.200424	0.211441	0.187497	0.195655	0.209696	0.188193	0.27965	0.282396	0.266035	0.272233	0.282131	0.274563	0.174627	0.186612	0.158617	0.171573	0.179235	0.172221	0.149535	0.174531	0.152487	0.160713	0.159649	0.164289	0.181037	0.181958	0.177302	0.1809	0.19065	0.181968	0.178652	0.184298	0.182371	0.177094	0.182151	0.163713
-131	0.169829	0.176261	0.161701	0.164699	0.182848	0.169179	0.226966	0.238267	0.209841	0.234506	0.236225	0.20425	0.197303	0.212895	0.202094	0.207102	0.225912	0.195925	0.27073	0.285764	0.25281	0.24776	0.279744	0.24513	0.183514	0.190716	0.170969	0.182046	0.182017	0.173745	0.17109	0.160301	0.159437	0.15909	0.16888	0.157159	0.179848	0.196851	0.185877	0.193393	0.188145	0.182862	0.171617	0.186363	0.194736	0.180711	0.170291	0.177835
-130	0.161028	0.173544	0.163307	0.171416	0.185575	0.156777	0.261852	0.279117	0.236309	0.273668	0.294106	0.250104	0.19936	0.224121	0.205156	0.21073	0.21516	0.2067	0.308876	0.330986	0.29878	0.30381	0.346968	0.300821	0.169275	0.17428	0.162923	0.175768	0.176975	0.15865	0.156629	0.165053	0.156568	0.160871	0.158955	0.153485	0.173902	0.178362	0.178456	0.180167	0.18042	0.174281	0.191032	0.18701	0.176617	0.194697	0.201495	0.184566
-129	0.170331	0.182129	0.155621	0.175701	0.189842	0.160282	0.238397	0.269899	0.235249	0.26297	0.254944	0.237561	0.206953	0.23756	0.20601	0.214163	0.223773	0.209939	0.287701	0.311742	0.283955	0.293954	0.303197	0.287035	0.167576	0.173712	0.164513	0.15964	0.164166	0.158054	0.157293	0.177486	0.155444	0.168948	0.165319	0.144878	0.165322	0.17945	0.180806	0.17244	0.181391	0.168204	0.154796	0.178823	0.165548	0.182497	0.192135	0.180831
-128	0.161907	0.177808	0.15145	0.168418	0.172867	0.159621	0.230049	0.257971	0.219365	0.226263	0.249937	0.217014	0.196927	0.2086	0.205053	0.198307	0.222034	0.199401	0.287465	0.305627	0.26998	0.298703	0.313613	0.268335	0.163167	0.166755	0.158329	0.159058	0.168166	0.15973	0.154287	0.168696	0.168972	0.163225	0.162411	0.162665	0.167521	0.176558	0.175308	0.170701	0.181692	0.171344	0.171094	0.163557	0.169832	0.180917	0.178688	0.187916
-127	0.168554	0.172114	0.158481	0.171341	0.17311	0.163009	0.259612	0.246827	0.232367	0.250077	0.253589	0.230443	0.201734	0.214512	0.204735	0.202751	0.222298	0.208428	0.300677	0.320043	0.284657	0.296368	0.306242	0.284619	0.174677	0.174217	0.158282	0.171365	0.178034	0.166825	0.169744	0.170277	0.164272	0.17337	0.169449	0.169368	0.180083	0.187991	0.178565	0.180693	0.191275	0.175862	0.191999	0.185854	0.191823	0.19515	0.184229	0.19159
-126	0.173618	0.185089	0.164137	0.188433	0.176633	0.164959	0.244128	0.258713	0.229211	0.246935	0.26227	0.243972	0.209244	0.224467	0.206358	0.202327	0.216311	0.210046	0.297212	0.335266	0.310775	0.295863	0.314863	0.284642	0.161081	0.162009	0.148051	0.167708	0.172044	0.151697	0.162849	0.177041	0.163208	0.164196	0.16367	0.160451	0.168741	0.178536	0.172949	0.166554	0.171496	0.171931	0.19383	0.186066	0.183495	0.184432	0.182779	0.184253
-125	0.173313	0.184083	0.168497	0.187587	0.191563	0.166606	0.237165	0.257669	0.228486	0.243933	0.25737	0.225905	0.203422	0.234551	0.21685	0.214788	0.219777	0.20503	0.312974	0.331094	0.285239	0.294235	0.332243	0.289209	0.165476	0.17254	0.154665	0.160032	0.167318	0.158699	0.167385	0.182724	0.16273	0.181254	0.176423	0.167669	0.171025	0.190939	0.172146	0.180277	0.190681	0.178275	0.185624	0.198015	0.183123	0.191291	0.194784	0.193658
-124	0.179979	0.183345	0.166516	0.175274	0.187765	0.171787	0.246947	0.273235	0.238748	0.25921	0.264118	0.243553	0.212949	0.225923	0.208815	0.213982	0.2271	0.216958	0.283043	0.32405	0.29217	0.304075	0.328873	0.295086	0.162107	0.168091	0.152725	0.166015	0.168925	0.157461	0.17798	0.196794	0.184707	0.195987	0.18728	0.178648	0.161888	0.190145	0.171594	0.184304	0.190647	0.178086	0.204157	0.209992	0.198345	0.205898	0.217231	0.191263
-123	0.166256	0.184828	0.165338	0.171728	0.171965	0.166014	0.283326	0.287674	0.259727	0.280955	0.311179	0.244442	0.217551	0.224192	0.207434	0.204942	0.223403	0.208387	0.337031	0.350356	0.326263	0.316247	0.359251	0.329747	0.159018	0.159973	0.152744	0.150124	0.157879	0.153842	0.174135	0.202859	0.15957	0.164464	0.185012	0.171936	0.168972	0.17134	0.174008	0.165389	0.175212	0.17623	0.18721	0.201907	0.193287	0.191878	0.203458	0.178117
-122	0.188019	0.179516	0.17386	0.178158	0.190133	0.171534	0.237897	0.271558	0.236727	0.259287	0.259006	0.238277	0.209865	0.221101	0.211348	0.211319	0.22249	0.208346	0.311895	0.322448	0.302365	0.313214	0.335165	0.294701	0.154361	0.164178	0.15785	0.153902	0.163835	0.158271	0.162912	0.181635	0.164226	0.179482	0.191784	0.179692	0.173564	0.181521	0.18024	0.179524	0.194676	0.164241	0.18726	0.190536	0.184686	0.193311	0.210295	0.200979
-121	0.183032	0.193144	0.172166	0.180197	0.189695	0.171163	0.245506	0.272366	0.247063	0.247723	0.26598	0.240424	0.224945	0.233784	0.214266	0.213631	0.239527	0.21884	0.293238	0.322758	0.295969	0.302673	0.331113	0.299031	0.153253	0.162289	0.147563	0.162863	0.165909	0.151578	0.180161	0.180051	0.183382	0.175227	0.194317	0.186228	0.171634	0.189734	0.171661	0.166445	0.180955	0.177746	0.209664	0.207525	0.201277	0.213114	0.216379	0.194804
-120	0.190997	0.191169	0.178147	0.181846	0.192182	0.17358	0.262867	0.266223	0.244493	0.258246	0.256295	0.256905	0.222842	0.232396	0.224375	0.228549	0.239368	0.230606	0.318877	0.337798	0.312264	0.316303	0.337611	0.301906	0.157306	0.163669	0.144037	0.15493	0.170531	0.154773	0.176982	0.183256	0.167114	0.18214	0.177413	0.171433	0.164949	0.169247	0.169633	0.168849	0.181516	0.178575	0.197272	0.202495	0.19414	0.196902	0.211631	0.190944
-119	0.182971	0.187563	0.170874	0.184376	0.190601	0.177129	0.268784	0.27984	0.246157	0.265178	0.280457	0.24927	0.223595	0.289914	0.219065	0.226714	0.23566	0.21941	0.321096	0.34808	0.314544	0.313278	0.340187	0.321265	0.150448	0.155957	0.143994	0.155026	0.161426	0.152456	0.168301	0.181655	0.173286	0.169575	0.178704	0.167934	0.168923	0.180842	0.166071	0.165382	0.179769	0.169259	0.192283	0.192704	0.18729	0.183559	0.195803	0.193854
-118	0.181742	0.198154	0.175349	0.185216	0.192881	0.178618	0.262942	0.25449	0.223761	0.244377	0.265749	0.235788	0.226014	0.243221	0.225424	0.223281	0.245693	0.231648	0.305052	0.34744	0.306367	0.310666	0.332158	0.295047	0.155088	0.152624	0.149963	0.153389	0.154554	0.150711	0.181212	0.189979	0.175119	0.190393	0.201639	0.181709	0.170352	0.181418	0.170568	0.162992	0.177761	0.164787	0.206434	0.204757	0.198485	0.209457	0.207565	0.213951
-117	0.180882	0.199564	0.172135	0.185287	0.196237	0.17832	0.26581	0.304102	0.278622	0.271424	0.294496	0.265282	0.227345	0.242848	0.234036	0.227594	0.254272	0.226215	0.334289	0.352856	0.342272	0.340481	0.366719	0.340465	0.150398	0.155051	0.14769	0.162322	0.15924	0.153736	0.182172	0.196499	0.180848	0.191936	0.203099	0.185307	0.170725	0.165681	0.16511	0.163269	0.174443	0.169856	0.213427	0.207664	0.209923	0.210475	0.225283	0.21755
-116	0.19314	0.200511	0.178524	0.187238	0.210214	0.170111	0.265084	0.28169	0.244899	0.260134	0.285688	0.262594	0.231716	0.246049	0.225491	0.245729	0.249865	0.229916	0.341582	0.33966	0.333701	0.321142	0.363925	0.33413	0.14143	0.148774	0.13716	0.14062	0.157027	0.143385	0.170348	0.168265	0.172681	0.170098	0.183207	0.174509	0.155622	0.164483	0.16624	0.159478	0.163055	0.157997	0.181996	0.187313	0.186086	0.201346	0.203067	0.18816
-115	0.187141	0.208914	0.171816	0.188548	0.203807	0.178569	0.262907	0.29903	0.268539	0.273945	0.282004	0.2628	0.239848	0.250349	0.228917	0.233584	0.254714	0.22543	0.335743	0.378635	0.339651	0.318866	0.353282	0.326974	0.146223	0.149181	0.138979	0.144859	0.14454	0.139246	0.172398	0.197646	0.171726	0.170814	0.19704	0.179265	0.157315	0.172441	0.151858	0.159662	0.163505	0.162372	0.203514	0.20251	0.204673	0.205268	0.228823	0.209363
-114	0.202484	0.210055	0.179311	0.193344	0.206607	0.18551	0.26405	0.28543	0.252335	0.26557	0.284623	0.250743	0.246064	0.259589	0.234133	0.239192	0.260719	0.235228	0.333453	0.348067	0.347181	0.322802	0.363959	0.332478	0.133818	0.138796	0.142338	0.135556	0.141786	0.147507	0.175065	0.184391	0.186163	0.186125	0.199626	0.186483	0.166039	0.165072	0.154567	0.159623	0.164361	0.161166	0.20718	0.21361	0.204765	0.225444	0.213503	0.200527
-113	0.201199	0.212128	0.187923	0.207654	0.213516	0.183857	0.264094	0.26504	0.258912	0.277794	0.290439	0.258751	0.240654	0.269555	0.238007	0.247224	0.264772	0.237303	0.353068	0.358385	0.33004	0.340473	0.371885	0.340763	0.139766	0.147403	0.145463	0.151228	0.146984	0.133098	0.186057	0.184594	0.173926	0.17784	0.188816	0.170799	0.164734	0.172827	0.154755	0.161136	0.165791	0.160972	0.198665	0.217692	0.211226	0.199847	0.205088	0.189881
-112	0.19937	0.208644	0.196513	0.196415	0.21995	0.19274	0.26526	0.276742	0.245078	0.266824	0.278804	0.25127	0.249692	0.279061	0.248008	0.251866	0.271908	0.245596	0.332998	0.342982	0.321669	0.329286	0.338992	0.329204	0.140761	0.154954	0.139495	0.146679	0.158763	0.139516	0.175328	0.191091	0.163941	0.180774	0.181426	0.180048	0.159057	0.164246	0.16506	0.157879	0.164658	0.161096	0.19287	0.198383	0.196235	0.193551	0.207347	0.191595
-111	0.223524	0.228001	0.196893	0.219655	0.227093	0.201542	0.272235	0.300879	0.263615	0.261413	0.311183	0.281951	0.269045	0.282368	0.248889	0.259921	0.27574	0.254383	0.347805	0.365353	0.330678	0.337855	0.37901	0.353543	0.144421	0.146841	0.138905	0.150918	0.14995	0.137307	0.191666	0.198315	0.192109	0.190965	0.19066	0.182761	0.162403	0.159534	0.161885	0.149356	0.169454	0.15354	0.201129	0.193766	0.209828	0.20698	0.210234	0.221162
-110	0.210049	0.216894	0.190502	0.202716	0.221494	0.191938	0.283672	0.290585	0.263968	0.291278	0.296974	0.273686	0.26459	0.271673	0.247987	0.26293	0.266854	0.2523	0.355982	0.385827	0.374012	0.357984	0.373622	0.347242	0.134391	0.145413	0.131221	0.136304	0.146807	0.139499	0.177513	0.182614	0.171806	0.178089	0.180903	0.178144	0.150615	0.160987	0.149136	0.148474	0.160024	0.150024	0.200277	0.192679	0.204473	0.199392	0.211835	0.204645
-109	0.209444	0.230077	0.204314	0.216557	0.228449	0.201039	0.263448	0.283632	0.24282	0.267974	0.284176	0.256509	0.266786	0.28013	0.244659	0.257515	0.292647	0.259223	0.340859	0.380904	0.336326	0.331582	0.376974	0.337946	0.142868	0.140508	0.134128	0.144168	0.145445	0.131997	0.181948	0.173697	0.173077	0.182189	0.194209	0.173898	0.154883	0.163255	0.15027	0.143879	0.155516	0.159334	0.196001	0.210366	0.213943	0.210891	0.209951	0.212696
-108	0.2144	0.227415	0.205746	0.218707	0.233119	0.206483	0.296176	0.304564	0.266956	0.300445	0.320083	0.287861	0.270243	0.291844	0.261178	0.266003	0.296458	0.258081	0.379121	0.383978	0.361522	0.364718	0.411451	0.367066	0.138388	0.14517	0.134309	0.146938	0.14376	0.131915	0.178096	0.191784	0.173581	0.181744	0.190782	0.185094	0.14669	0.171318	0.152112	0.158886	0.160173	0.157384	0.20588	0.203806	0.203278	0.205662	0.203342	0.21773
-107	0.217956	0.234594	0.206266	0.218946	0.231878	0.194794	0.291642	0.302253	0.284387	0.289699	0.307363	0.283856	0.261102	0.287716	0.267173	0.266676	0.306346	0.264886	0.349246	0.381741	0.361594	0.369971	0.391699	0.354375	0.125444	0.130125	0.127073	0.148098	0.13059	0.1319	0.181321	0.170089	0.180349	0.176687	0.186722	0.185588	0.147718	0.160149	0.149105	0.147221	0.153761	0.155976	0.197037	0.208191	0.20975	0.206584	0.21897	0.191041
-106	0.218452	0.22729	0.209482	0.227463	0.237611	0.216153	0.306923	0.320402	0.27638	0.314439	0.318173	0.293105	0.26574	0.301828	0.271243	0.271609	0.297878	0.26919	0.376844	0.420819	0.392985	0.400474	0.44504	0.391153	0.135266	0.13946	0.129008	0.148483	0.148793	0.131107	0.178401	0.187115	0.180981	0.185981	0.179377	0.172138	0.150375	0.157603	0.154643	0.159956	0.15294	0.149307	0.211179	0.204685	0.195236	0.195756	0.210776	0.203633
-105	0.227255	0.244293	0.207108	0.227727	0.237323	0.215919	0.327582	0.335509	0.31563	0.316801	0.33113	0.299346	0.262729	0.284561	0.263382	0.269314	0.292155	0.268107	0.394045	0.42462	0.387963	0.399464	0.425857	0.406422	0.139079	0.145309	0.138068	0.142645	0.143817	0.141591	0.196062	0.197594	0.206413	0.220346	0.226292	0.183131	0.154033	0.152661	0.153045	0.151124	0.154828	0.157049	0.230167	0.227441	0.247187	0.250131	0.244407	0.22694
-104	0.225535	0.23483	0.206215	0.229317	0.241462	0.207237	0.31988	0.34668	0.311929	0.319991	0.349593	0.321076	0.273321	0.29282	0.268118	0.274722	0.295368	0.263769	0.411103	0.449106	0.405466	0.397726	0.422577	0.38523	0.132716	0.143738	0.12502	0.143903	0.138416	0.133694	0.180123	0.213333	0.191097	0.189042	0.198604	0.192105	0.151895	0.152777	0.144963	0.151471	0.162722	0.158497	0.219326	0.214201	0.217362	0.21805	0.234759	0.217388
-103	0.232307	0.261377	0.22185	0.241833	0.260826	0.225382	0.317223	0.331904	0.302852	0.311441	0.353443	0.312285	0.296649	0.316449	0.288229	0.299615	0.325171	0.288134	0.412901	0.465867	0.420369	0.40436	0.443194	0.405881	0.13473	0.138545	0.128327	0.137993	0.14321	0.13992	0.170729	0.17999	0.171722	0.175809	0.189547	0.171352	0.152719	0.1554	0.151526	0.154419	0.164325	0.15491	0.203642	0.21473	0.205024	0.19902	0.217682	0.208876
-102	0.23089	0.24433	0.20966	0.230832	0.243224	0.219278	0.319775	0.341422	0.320539	0.330857	0.347436	0.320656	0.301597	0.320745	0.293877	0.294029	0.30836	0.280376	0.414306	0.443073	0.403039	0.417977	0.459124	0.410648	0.13855	0.147666	0.133304	0.138267	0.147312	0.139886	0.184271	0.207682	0.182036	0.183843	0.194351	0.190173	0.158869	0.160056	0.163249	0.157475	0.160486	0.159238	0.212497	0.222542	0.22256	0.231505	0.235017	0.211175
-101	0.237701	0.251561	0.220924	0.24577	0.258314	0.223002	0.347259	0.353708	0.324032	0.338282	0.347041	0.326884	0.305516	0.327602	0.284884	0.295876	0.318386	0.2935	0.413718	0.453747	0.403699	0.404635	0.458546	0.40666	0.133687	0.142427	0.141468	0.13783	0.148135	0.138789	0.18747	0.185181	0.176246	0.177898	0.206993	0.182758	0.152095	0.166772	0.155637	0.154817	0.159969	0.155243	0.200338	0.199106	0.201868	0.219959	0.210869	0.204096
-100	0.246832	0.26881	0.221855	0.244236	0.261872	0.222085	0.351979	0.358922	0.333995	0.355474	0.342049	0.33632	0.307382	0.333224	0.299315	0.30123	0.328543	0.287405	0.41954	0.473179	0.422178	0.412918	0.46052	0.436743	0.127815	0.145979	0.13027	0.138494	0.147568	0.135758	0.173284	0.182222	0.176067	0.172034	0.192844	0.182682	0.151865	0.165829	0.15712	0.165516	0.167548	0.158862	0.195091	0.192797	0.20043	0.202741	0.216651	0.203693
-99	0.244697	0.27375	0.231429	0.249357	0.274088	0.231648	0.369924	0.376417	0.351917	0.363807	0.384806	0.360596	0.317941	0.346363	0.313073	0.316801	0.340584	0.306257	0.46591	0.506738	0.475688	0.472906	0.523294	0.456439	0.133904	0.13663	0.129834	0.142152	0.13449	0.13568	0.193979	0.18782	0.178425	0.199426	0.197284	0.195422	0.160766	0.156888	0.152204	0.154353	0.160682	0.157897	0.219384	0.212887	0.214808	0.221976	0.22132	0.219828
-98	0.245047	0.2629	0.234147	0.244574	0.280145	0.232828	0.37252	0.368467	0.337977	0.365595	0.376181	0.354154	0.320055	0.337374	0.294233	0.307495	0.339745	0.312799	0.446234	0.461715	0.434471	0.442175	0.475297	0.433017	0.139186	0.154456	0.141193	0.140782	0.152593	0.133716	0.195002	0.19934	0.182778	0.195549	0.203378	0.20584	0.165766	0.165947	0.161573	0.164794	0.177133	0.166266	0.218061	0.229326	0.226903	0.22092	0.242006	0.233756
-97	0.254469	0.264487	0.223843	0.245258	0.266294	0.235587	0.391402	0.420727	0.383896	0.386934	0.416231	0.395429	0.309562	0.347623	0.296353	0.307324	0.356602	0.304348	0.476567	0.514704	0.475472	0.471906	0.505692	0.469014	0.129016	0.133998	0.130684	0.13484	0.148369	0.136351	0.199713	0.205021	0.182333	0.183537	0.212491	0.197044	0.153143	0.151791	0.161688	0.157466	0.165262	0.144131	0.213683	0.221721	0.231617	0.216903	0.243724	0.22275
-96	0.265501	0.293019	0.251799	0.264984	0.297955	0.24437	0.36664	0.38464	0.345458	0.347934	0.396672	0.372734	0.337136	0.358551	0.319894	0.339115	0.371612	0.328801	0.429516	0.500986	0.445667	0.453419	0.495829	0.456698	0.141333	0.132676	0.132536	0.150278	0.145642	0.146094	0.179885	0.186831	0.183323	0.185288	0.196072	0.173768	0.151934	0.164493	0.152584	0.155086	0.152259	0.160823	0.223957	0.227448	0.210843	0.209672	0.219129	0.227307
-95	0.269567	0.286887	0.245751	0.27006	0.301374	0.256417	0.385238	0.392966	0.358664	0.384319	0.419122	0.385931	0.343478	0.369368	0.335829	0.345981	0.373166	0.345097	0.452496	0.530923	0.455582	0.468066	0.498339	0.459453	0.139061	0.138506	0.132239	0.140291	0.142436	0.135247	0.182252	0.177579	0.188026	0.199149	0.197375	0.194635	0.152254	0.159324	0.16363	0.160633	0.163436	0.154842	0.21467	0.222792	0.226915	0.217057	0.234684	0.226067
-94	0.269583	0.298755	0.247455	0.262561	0.289041	0.254608	0.404177	0.432728	0.360933	0.388416	0.413724	0.386585	0.350701	0.373328	0.339478	0.343152	0.375587	0.324625	0.475672	0.546565	0.492903	0.510294	0.519044	0.474517	0.136315	0.136751	0.127032	0.130911	0.141983	0.125411	0.196424	0.213054	0.202891	0.204467	0.217017	0.202819	0.143938	0.156809	0.15826	0.144719	0.159632	0.155116	0.236553	0.251523	0.251817	0.24809	0.251795	0.240878
-93	0.279612	0.302673	0.261505	0.272673	0.307389	0.255216	0.408504	0.421492	0.395313	0.420852	0.43528	0.393039	0.345498	0.382356	0.337893	0.363714	0.382118	0.346742	0.48866	0.539249	0.483248	0.495233	0.524086	0.48185	0.137893	0.144843	0.133304	0.14677	0.140361	0.138228	0.213989	0.224544	0.198685	0.220543	0.22642	0.217388	0.15927	0.162083	0.163952	0.158217	0.170893	0.168536	0.245507	0.25971	0.259384	0.238449	0.264885	0.263559
-92	0.287395	0.301056	0.260411	0.286835	0.318946	0.257672	0.391941	0.420707	0.385105	0.390235	0.42027	0.399439	0.373572	0.39534	0.34876	0.361613	0.404994	0.346091	0.483089	0.522784	0.486302	0.463228	0.489151	0.473482	0.136352	0.141315	0.132254	0.136133	0.143583	0.137504	0.209462	0.195956	0.196092	0.196986	0.201481	0.210358	0.160026	0.161174	0.15668	0.165756	0.173069	0.165128	0.231984	0.234813	0.239576	0.242353	0.257411	0.233227
-91	0.279395	0.324923	0.26023	0.279352	0.320698	0.264969	0.465995	0.484882	0.428979	0.457821	0.485381	0.424031	0.363714	0.407553	0.357155	0.358478	0.408297	0.346322	0.524788	0.566894	0.522745	0.517773	0.562235	0.516417	0.136633	0.142068	0.13182	0.145364	0.146807	0.145349	0.179552	0.191695	0.180515	0.19166	0.195689	0.186603	0.162513	0.166786	0.165142	0.158901	0.171547	0.174794	0.228796	0.227339	0.232034	0.228073	0.245958	0.229213
-90	0.299965	0.322884	0.28654	0.299341	0.326672	0.285049	0.411471	0.421917	0.388474	0.410592	0.414827	0.406224	0.389231	0.415296	0.37751	0.383401	0.421389	0.36777	0.46233	0.504071	0.478758	0.482327	0.521378	0.467629	0.134031	0.147578	0.135604	0.14165	0.153017	0.144436	0.197194	0.194952	0.201539	0.189034	0.20439	0.193748	0.171312	0.173007	0.164185	0.170189	0.180849	0.167852	0.235696	0.233727	0.240717	0.234182	0.237923	0.246522
-89	0.290822	0.314241	0.25985	0.293313	0.316869	0.268396	0.425068	0.433349	0.378548	0.420891	0.433794	0.397077	0.387773	0.399433	0.359062	0.37167	0.414096	0.350825	0.492593	0.521576	0.493656	0.47417	0.496224	0.475648	0.144558	0.148297	0.139298	0.14443	0.155734	0.140189	0.200312	0.210072	0.213012	0.212616	0.215041	0.215961	0.167068	0.175856	0.162533	0.172123	0.176776	0.172042	0.250082	0.241035	0.24147	0.241562	0.264505	0.261482
-88	0.300097	0.339353	0.27653	0.306368	0.337858	0.291908	0.44403	0.457291	0.413281	0.453043	0.478534	0.412325	0.383695	0.432825	0.370347	0.37888	0.417899	0.368107	0.499425	0.557932	0.496877	0.505417	0.550839	0.496851	0.142513	0.153086	0.143449	0.142854	0.154349	0.151194	0.213706	0.242379	0.224015	0.215124	0.226545	0.226031	0.178712	0.168039	0.172236	0.180893	0.186134	0.179082	0.266126	0.260745	0.261197	0.262911	0.2714	0.276773
-87	0.31242	0.34874	0.298282	0.32041	0.352356	0.293298	0.438267	0.459872	0.416546	0.430158	0.457913	0.422458	0.405507	0.439583	0.385296	0.404759	0.435951	0.383168	0.495777	0.555627	0.489621	0.482054	0.517609	0.482187	0.143296	0.147373	0.147482	0.155276	0.158182	0.151421	0.193703	0.193404	0.193978	0.209752	0.203758	0.199075	0.181743	0.173368	0.184032	0.184422	0.186347	0.182212	0.23631	0.254854	0.237066	0.246785	0.250709	0.248902
-86	0.315625	0.371	0.297081	0.3208	0.355539	0.299531	0.465682	0.494977	0.436118	0.440911	0.515839	0.429624	0.407914	0.429259	0.372857	0.404005	0.439397	0.382522	0.549928	0.562062	0.522243	0.539213	0.571108	0.531625	0.137424	0.145612	0.141282	0.142498	0.151312	0.15065	0.199092	0.215771	0.21812	0.218755	0.214955	0.202258	0.171625	0.172513	0.176401	0.176556	0.18679	0.174821	0.259631	0.26368	0.277756	0.262913	0.262799	0.264507
-85	0.320644	0.356524	0.306214	0.327559	0.353702	0.30984	0.477581	0.511108	0.444551	0.506217	0.505863	0.473884	0.414995	0.455408	0.395657	0.407646	0.451525	0.395528	0.549716	0.578622	0.528905	0.52239	0.585217	0.530731	0.134675	0.153676	0.135038	0.13469	0.146934	0.137531	0.203575	0.200883	0.21254	0.208258	0.209298	0.192865	0.16559	0.175878	0.172102	0.170011	0.180802	0.177839	0.246941	0.267685	0.2556	0.241632	0.247459	0.264238
-84	0.32872	0.369873	0.309279	0.349974	0.366028	0.329861	0.516083	0.533225	0.476014	0.500684	0.527895	0.498645	0.411636	0.443803	0.395835	0.406304	0.441633	0.400154	0.599549	0.611828	0.584268	0.580053	0.62141	0.567082	0.149857	0.150756	0.142024	0.149414	0.158589	0.14751	0.199414	0.206731	0.200406	0.211068	0.207324	0.199868	0.177932	0.195491	0.185356	0.177625	0.189119	0.1794	0.240959	0.237554	0.247571	0.246975	0.244354	0.245808
-83	0.343945	0.375336	0.309974	0.326089	0.374631	0.314372	0.490913	0.544213	0.470359	0.494198	0.542324	0.448367	0.425584	0.451106	0.400254	0.404513	0.460438	0.398141	0.566678	0.598543	0.529064	0.567629	0.609258	0.540147	0.138872	0.15432	0.143113	0.144534	0.151429	0.14873	0.194404	0.215118	0.197408	0.202233	0.209373	0.207749	0.170084	0.178689	0.178953	0.180993	0.188266	0.175743	0.252669	0.254991	0.257713	0.250268	0.260626	0.255281
-82	0.361299	0.387595	0.31871	0.343734	0.395888	0.331884	0.541668	0.566381	0.514917	0.520373	0.58854	0.526313	0.422231	0.458715	0.413486	0.419582	0.465871	0.413121	0.585534	0.633106	0.583358	0.598198	0.621752	0.577364	0.142728	0.156391	0.141599	0.148767	0.157104	0.137072	0.209943	0.215356	0.214989	0.200103	0.217778	0.217867	0.180392	0.182133	0.174253	0.174184	0.188205	0.177303	0.277438	0.267959	0.273389	0.268611	0.287695	0.28921
-81	0.354188	0.396628	0.326723	0.354928	0.410002	0.339145	0.541717	0.572079	0.534652	0.546882	0.609767	0.525172	0.438605	0.463408	0.419154	0.439297	0.471677	0.430546	0.613111	0.629506	0.608616	0.612352	0.650137	0.589879	0.154682	0.159038	0.143035	0.15701	0.166429	0.146939	0.206508	0.221251	0.210472	0.218979	0.217204	0.226224	0.18035	0.198324	0.190005	0.196475	0.191175	0.187123	0.268775	0.274632	0.269241	0.270159	0.270256	0.266545
-80	0.377835	0.422211	0.350567	0.369486	0.418236	0.34958	0.549587	0.589405	0.517718	0.550111	0.590451	0.525653	0.456286	0.49995	0.425423	0.447275	0.491292	0.430283	0.583481	0.6426	0.573933	0.569276	0.622709	0.563931	0.147254	0.151494	0.143224	0.148146	0.165868	0.13915	0.20652	0.227985	0.213325	0.220423	0.239456	0.222129	0.176296	0.175634	0.185241	0.186562	0.184854	0.174667	0.271345	0.261644	0.272797	0.291724	0.285093	0.274549
-79	0.375677	0.42821	0.3421	0.376396	0.435333	0.354615	0.566406	0.628347	0.531486	0.552907	0.601964	0.553353	0.460054	0.482791	0.440129	0.460522	0.476305	0.435573	0.602199	0.642544	0.588672	0.595715	0.619885	0.578675	0.143735	0.15944	0.152314	0.158609	0.157431	0.149152	0.233258	0.236085	0.22278	0.234322	0.258563	0.245065	0.189132	0.189426	0.185692	0.201416	0.20501	0.190845	0.289614	0.292506	0.28035	0.300006	0.30825	0.295171
-78	0.391369	0.4309	0.353856	0.385063	0.435122	0.352158	0.566376	0.575795	0.52566	0.532679	0.583703	0.519068	0.458632	0.502396	0.439821	0.461849	0.507165	0.448001	0.598416	0.622321	0.567271	0.570777	0.610584	0.587904	0.14957	0.148627	0.147879	0.151785	0.160322	0.151259	0.23194	0.240118	0.246346	0.232812	0.255955	0.230259	0.194022	0.193725	0.182766	0.195093	0.19817	0.195874	0.283078	0.291601	0.295351	0.298543	0.310493	0.298038
-77	0.400226	0.424496	0.359165	0.380148	0.426939	0.370684	0.597558	0.641947	0.578184	0.606936	0.657359	0.569853	0.457619	0.491245	0.437498	0.451013	0.493923	0.433283	0.636494	0.686932	0.623563	0.660812	0.659702	0.638027	0.146945	0.157999	0.146295	0.152423	0.159658	0.151843	0.246333	0.241836	0.228503	0.237166	0.268201	0.243207	0.188203	0.191883	0.195573	0.189512	0.194761	0.188247	0.296529	0.298321	0.304873	0.30534	0.319377	0.313516
-76	0.400966	0.436383	0.366259	0.405508	0.449049	0.367664	0.55518	0.599698	0.559604	0.544155	0.612566	0.532347	0.470467	0.504562	0.443939	0.459946	0.487378	0.440592	0.616253	0.635094	0.595217	0.60622	0.63211	0.569443	0.154599	0.159555	0.144782	0.15617	0.160465	0.147053	0.224011	0.250819	0.23064	0.236286	0.25752	0.227247	0.19512	0.193544	0.191006	0.193414	0.201267	0.194871	0.29795	0.304139	0.29034	0.300854	0.305908	0.295157
-75	0.410242	0.461527	0.371806	0.416433	0.467143	0.37324	0.596538	0.664545	0.607778	0.621741	0.657132	0.609753	0.480521	0.511857	0.460518	0.470898	0.541258	0.461012	0.666528	0.694551	0.656405	0.652585	0.692144	0.664636	0.155453	0.169652	0.153728	0.161153	0.170266	0.16157	0.238643	0.25408	0.228978	0.245605	0.249975	0.243894	0.195547	0.202621	0.201193	0.202028	0.205981	0.205453	0.301043	0.308058	0.302255	0.310669	0.318599	0.305662
-74	0.410854	0.472464	0.392207	0.419898	0.465584	0.39019	0.609866	0.626306	0.602895	0.623905	0.644891	0.619596	0.488681	0.522302	0.469207	0.493837	0.514993	0.464503	0.655336	0.673299	0.641968	0.644629	0.661271	0.613934	0.149595	0.164939	0.14961	0.156377	0.168298	0.160513	0.222187	0.266319	0.232944	0.248517	0.257901	0.254652	0.199572	0.196711	0.210699	0.19734	0.221541	0.207171	0.30478	0.306437	0.320655	0.296676	0.325691	0.319916
-73	0.453815	0.505014	0.418759	0.439336	0.51593	0.415806	0.634028	0.652219	0.621151	0.61776	0.687422	0.609883	0.534828	0.548299	0.486784	0.516787	0.538322	0.488433	0.656123	0.694326	0.646601	0.649855	0.690324	0.655199	0.150159	0.176348	0.15437	0.164251	0.175092	0.159658	0.252752	0.25436	0.243101	0.250252	0.255113	0.252551	0.204	0.208618	0.196344	0.199972	0.209043	0.209979	0.303775	0.316322	0.303765	0.304973	0.322006	0.312172
-72	0.42772	0.4846	0.397604	0.426735	0.486435	0.408239	0.622813	0.667202	0.629493	0.662504	0.68333	0.602502	0.506815	0.544286	0.487008	0.495083	0.537789	0.461729	0.648016	0.671788	0.648938	0.658095	0.685334	0.652181	0.158456	0.175054	0.163937	0.171264	0.183847	0.16077	0.27059	0.280829	0.262175	0.278224	0.290063	0.25818	0.214045	0.211944	0.209331	0.213423	0.230012	0.213177	0.337988	0.349759	0.34644	0.338259	0.356844	0.356251
-71	0.460111	0.504323	0.413071	0.453093	0.51369	0.426963	0.667384	0.704119	0.645866	0.687783	0.720384	0.65799	0.508936	0.538431	0.482926	0.503878	0.544414	0.487826	0.699121	0.738238	0.677323	0.675117	0.69579	0.687379	0.155592	0.166786	0.156685	0.162691	0.172329	0.163133	0.261567	0.26358	0.253644	0.257229	0.261126	0.262168	0.20267	0.215096	0.215621	0.219641	0.225167	0.212088	0.314204	0.313627	0.321163	0.327037	0.349002	0.326692
-70	0.484974	0.523763	0.449848	0.48309	0.537335	0.452435	0.67878	0.689213	0.633697	0.656229	0.695661	0.639178	0.544466	0.577467	0.519418	0.531327	0.552609	0.498017	0.678113	0.699014	0.681848	0.662094	0.705637	0.660102	0.162195	0.178925	0.156044	0.167157	0.180195	0.166344	0.263815	0.281088	0.278075	0.26025	0.30147	0.292763	0.210915	0.220851	0.19996	0.207434	0.22605	0.213408	0.337	0.344985	0.344907	0.350249	0.375996	0.358329
-69	0.492976	0.53445	0.442229	0.489975	0.547676	0.441753	0.69815	0.706619	0.651775	0.693938	0.727253	0.675453	0.534067	0.560462	0.504754	0.52273	0.556619	0.493363	0.715083	0.723782	0.700632	0.711346	0.708382	0.686954	0.16251	0.175165	0.154717	0.163726	0.182904	0.170401	0.279584	0.314867	0.289729	0.300012	0.313766	0.295866	0.206925	0.212451	0.215167	0.21678	0.221386	0.223866	0.360165	0.37129	0.364997	0.358872	0.376646	0.377239
-68	0.499231	0.543431	0.45673	0.483011	0.554238	0.446902	0.694741	0.720995	0.659109	0.678179	0.710767	0.644881	0.554291	0.57303	0.510268	0.522695	0.556363	0.506024	0.707294	0.723101	0.701559	0.710485	0.712241	0.679031	0.165031	0.183157	0.176665	0.167044	0.189339	0.173845	0.271723	0.313954	0.27839	0.272296	0.316316	0.295341	0.224533	0.22448	0.211969	0.222368	0.235042	0.228101	0.365133	0.373504	0.34311	0.358162	0.395407	0.359922
-67	0.518613	0.585468	0.463311	0.509544	0.592683	0.484415	0.689567	0.739824	0.674163	0.693316	0.746408	0.67514	0.550517	0.581198	0.519471	0.554922	0.580909	0.536151	0.712393	0.727486	0.68818	0.713979	0.717212	0.709547	0.159026	0.182768	0.161109	0.173452	0.185799	0.164329	0.268871	0.273499	0.29144	0.280743	0.298456	0.289188	0.214393	0.226566	0.221762	0.226953	0.232057	0.225494	0.344256	0.338715	0.348332	0.329724	0.343582	0.358844
-66	0.53039	0.563451	0.469809	0.521714	0.585737	0.478366	0.690422	0.715643	0.65613	0.689325	0.713324	0.648456	0.545668	0.59168	0.520054	0.547253	0.586209	0.512953	0.675806	0.673804	0.66072	0.672659	0.675593	0.664549	0.174932	0.184043	0.167032	0.181501	0.197424	0.18119	0.286182	0.300345	0.309497	0.310543	0.32256	0.309538	0.232747	0.235286	0.228722	0.234131	0.2499	0.227716	0.380107	0.388878	0.384974	0.384994	0.393076	0.3868
-65	0.534228	0.591147	0.492231	0.536207	0.587248	0.491535	0.75451	0.780498	0.695189	0.755567	0.830394	0.694483	0.559715	0.585771	0.548522	0.56548	0.575142	0.530263	0.763413	0.736608	0.736135	0.743869	0.73139	0.735873	0.17892	0.188125	0.180868	0.178876	0.201044	0.179905	0.308277	0.327916	0.317956	0.310492	0.337658	0.330911	0.235074	0.232305	0.227527	0.24116	0.247629	0.230295	0.366538	0.404956	0.384015	0.3951	0.403675	0.406361
-64	0.549919	0.604752	0.506773	0.543919	0.612917	0.515918	0.719665	0.750207	0.684623	0.735108	0.765249	0.688289	0.590174	0.611966	0.540027	0.580368	0.605931	0.531964	0.746768	0.734574	0.697233	0.743889	0.722525	0.702914	0.175947	0.1967	0.176156	0.185295	0.200728	0.188191	0.300104	0.325912	0.31949	0.308401	0.343395	0.317713	0.234002	0.243519	0.241589	0.245708	0.251055	0.242184	0.364961	0.38694	0.381237	0.376916	0.4005	0.40614
-63	0.558291	0.610731	0.513963	0.56456	0.627939	0.521427	0.745951	0.779793	0.682607	0.760198	0.785553	0.685649	0.59399	0.608649	0.550181	0.601034	0.617937	0.543961	0.7374	0.746378	0.718896	0.736654	0.744212	0.710337	0.193811	0.195123	0.191569	0.195527	0.21184	0.183797	0.294386	0.327596	0.309522	0.310074	0.336909	0.326593	0.24027	0.250707	0.255932	0.254017	0.274089	0.248775	0.384164	0.385668	0.372992	0.366383	0.399681	0.383341
-62	0.56781	0.627953	0.522845	0.570664	0.648389	0.51646	0.777492	0.758194	0.697574	0.732262	0.777092	0.696039	0.598918	0.63344	0.57755	0.582393	0.617522	0.56634	0.745787	0.72566	0.720757	0.755397	0.719648	0.705416	0.187476	0.190197	0.186743	0.182555	0.213637	0.183957	0.317906	0.338863	0.323738	0.320126	0.362472	0.31331	0.248798	0.252513	0.24225	0.247466	0.268329	0.24782	0.380397	0.397548	0.389962	0.393647	0.390708	0.403095
-61	0.598152	0.659013	0.538943	0.60251	0.671617	0.540977	0.773126	0.763264	0.696963	0.744341	0.79906	0.732385	0.623186	0.642535	0.580647	0.627277	0.645909	0.565548	0.761206	0.73341	0.749989	0.770278	0.734562	0.72155	0.190827	0.205326	0.192208	0.200016	0.219614	0.185567	0.292128	0.316916	0.308359	0.299501	0.346302	0.317152	0.255503	0.267933	0.246816	0.266694	0.277477	0.256879	0.39052	0.397891	0.382937	0.375323	0.419057	0.393408
-60	0.597066	0.663854	0.547283	0.615	0.65547	0.533445	0.720458	0.736399	0.651625	0.753152	0.773028	0.70686	0.615475	0.63071	0.574933	0.613762	0.633726	0.587085	0.713511	0.680801	0.680052	0.73125	0.680555	0.686462	0.194426	0.210177	0.178203	0.204366	0.227155	0.197661	0.343054	0.359066	0.350091	0.335493	0.378911	0.352973	0.254821	0.266685	0.239008	0.252642	0.277597	0.259956	0.422792	0.391918	0.406444	0.421365	0.42508	0.426316
-59	0.595885	0.67337	0.551647	0.611606	0.678971	0.569883	0.782124	0.795002	0.716097	0.792641	0.792891	0.691971	0.63402	0.65902	0.597986	0.628141	0.653059	0.57526	0.759639	0.738403	0.748108	0.757733	0.744976	0.746583	0.198643	0.209873	0.193763	0.197154	0.230526	0.201929	0.33622	0.364937	0.359325	0.36209	0.395444	0.355993	0.256631	0.259091	0.26122	0.261282	0.283431	0.254454	0.417968	0.448403	0.428372	0.460395	0.447838	0.445396
-58	0.615993	0.682708	0.565053	0.632343	0.698981	0.569314	0.748384	0.782731	0.679049	0.769704	0.793225	0.694491	0.645427	0.66109	0.593598	0.632767	0.642229	0.599048	0.739685	0.705537	0.693568	0.748115	0.72915	0.716078	0.196462	0.219184	0.181893	0.199996	0.222808	0.1935	0.324039	0.345026	0.330236	0.326689	0.348347	0.34669	0.260699	0.261515	0.256987	0.258334	0.279623	0.269918	0.408491	0.39876	0.40673	0.395907	0.44322	0.398827
-57	0.638977	0.716835	0.588667	0.658974	0.727608	0.577435	0.786079	0.739846	0.7167	0.778057	0.798949	0.704204	0.673039	0.680689	0.610213	0.665738	0.6653	0.622786	0.782723	0.733369	0.743494	0.758059	0.700676	0.731787	0.200355	0.223856	0.201816	0.209693	0.240549	0.197356	0.321803	0.33961	0.341734	0.339409	0.366733	0.352715	0.275209	0.276819	0.263158	0.278666	0.29055	0.27626	0.428005	0.423825	0.427269	0.408961	0.429442	0.429342
-56	0.66122	0.723952	0.591551	0.656141	0.732914	0.591961	0.77175	0.837724	0.730758	0.789278	0.839981	0.732213	0.678979	0.68677	0.636991	0.665012	0.687183	0.6322	0.765784	0.717706	0.730527	0.767242	0.747264	0.734865	0.206801	0.232316	0.208915	0.215438	0.24205	0.215591	0.340787	0.35574	0.349424	0.361389	0.386589	0.362696	0.278385	0.284571	0.26265	0.291359	0.290124	0.27605	0.426692	0.454519	0.445885	0.428708	0.429046	0.440143
-55	0.686502	0.722036	0.588063	0.66574	0.731228	0.618463	0.784401	0.763069	0.713146	0.762839	0.788707	0.703865	0.684538	0.707414	0.625929	0.67472	0.69007	0.629716	0.742814	0.730522	0.717281	0.738149	0.738802	0.707213	0.215037	0.234018	0.213614	0.220305	0.248994	0.21492	0.345455	0.373325	0.355057	0.352399	0.383981	0.364521	0.287988	0.286084	0.271625	0.286287	0.311614	0.284498	0.440987	0.438159	0.439831	0.432572	0.44876	0.481682
-54	0.687193	0.761088	0.608889	0.690352	0.770083	0.600488	0.769752	0.820348	0.735429	0.786069	0.846671	0.735017	0.704369	0.727434	0.643557	0.697509	0.702111	0.624832	0.757394	0.737926	0.746214	0.74149	0.721785	0.742356	0.22761	0.238589	0.209543	0.23984	0.252622	0.22652	0.350234	0.375339	0.341166	0.360454	0.364638	0.357347	0.293003	0.293801	0.290136	0.302553	0.322086	0.298767	0.414452	0.431696	0.439917	0.425721	0.453062	0.45052
-53	0.698756	0.769769	0.609166	0.696236	0.780816	0.61432	0.767032	0.769882	0.718388	0.768055	0.848453	0.711647	0.718663	0.711089	0.665679	0.71409	0.724346	0.649284	0.756704	0.744015	0.714073	0.770123	0.730234	0.739719	0.223893	0.24184	0.214236	0.244565	0.264361	0.218397	0.35107	0.386932	0.387161	0.389775	0.427741	0.410797	0.294644	0.305537	0.282813	0.3127	0.31906	0.295878	0.471198	0.507739	0.471419	0.469124	0.481257	0.469804
-52	0.680948	0.739652	0.607195	0.695	0.758416	0.608636	0.817142	0.835231	0.742732	0.795555	0.845441	0.71543	0.700284	0.695739	0.633237	0.690034	0.690069	0.629938	0.796655	0.736515	0.726048	0.764619	0.738284	0.735697	0.22984	0.254682	0.234285	0.240358	0.279064	0.236134	0.369758	0.400825	0.375038	0.383841	0.426092	0.410698	0.305868	0.325437	0.305744	0.306309	0.329333	0.293755	0.489529	0.466588	0.47994	0.466042	0.489817	0.490454
-51	0.723638	0.747818	0.619149	0.720913	0.792025	0.646837	0.764801	0.795241	0.688343	0.81841	0.840657	0.701465	0.730946	0.723418	0.65639	0.717307	0.737454	0.668896	0.765582	0.729397	0.707011	0.770376	0.729086	0.697788	0.23906	0.259315	0.232975	0.24753	0.284287	0.257763	0.404938	0.427649	0.430665	0.392201	0.467207	0.436399	0.315572	0.328069	0.319664	0.330964	0.333481	0.309584	0.484613	0.508545	0.489752	0.474719	0.526108	0.495251
-50	0.729646	0.765979	0.636082	0.712438	0.804683	0.63792	0.744214	0.812486	0.664113	0.772842	0.816979	0.657871	0.734843	0.736146	0.662816	0.736239	0.713638	0.664341	0.742881	0.687515	0.676447	0.717191	0.733003	0.683799	0.245894	0.266827	0.230909	0.260383	0.287303	0.249732	0.395206	0.441811	0.415048	0.421694	0.433941	0.448619	0.338634	0.348254	0.321222	0.336702	0.337365	0.329074	0.480147	0.485051	0.50097	0.507279	0.537785	0.510046
-49	0.719484	0.778127	0.626111	0.728231	0.821746	0.641089	0.775212	0.796513	0.707242	0.795405	0.803695	0.687882	0.749477	0.735372	0.666021	0.748015	0.753719	0.666586	0.782167	0.71169	0.697309	0.757611	0.72674	0.699828	0.248294	0.28868	0.256966	0.26704	0.295609	0.25523	0.413343	0.423712	0.447055	0.415447	0.460656	0.441404	0.325118	0.342374	0.318587	0.35223	0.359504	0.344557	0.510604	0.534821	0.515335	0.522609	0.535688	0.521409
-48	0.734986	0.796655	0.648991	0.759106	0.815422	0.649117	0.746815	0.764553	0.664855	0.741171	0.791141	0.676413	0.751957	0.765546	0.687235	0.752121	0.766225	0.694043	0.747234	0.672652	0.675019	0.73689	0.670511	0.690821	0.257821	0.269066	0.24852	0.249021	0.291423	0.249969	0.391929	0.42643	0.4126	0.420316	0.439266	0.440643	0.328261	0.34054	0.321733	0.333275	0.353365	0.310712	0.506922	0.491599	0.504088	0.487205	0.535439	0.524809
-47	0.740058	0.786159	0.62903	0.738821	0.796641	0.631351	0.767909	0.784669	0.694714	0.791303	0.799051	0.703928	0.750506	0.734547	0.661322	0.738745	0.765687	0.668658	0.746228	0.678189	0.679155	0.767905	0.713495	0.685223	0.252627	0.285618	0.260708	0.272911	0.309952	0.264447	0.42789	0.448126	0.458145	0.435756	0.474402	0.478465	0.347114	0.360308	0.3373	0.353422	0.369809	0.358573	0.509288	0.533282	0.532009	0.538808	0.547923	0.529857
-46	0.716012	0.763047	0.628143	0.723054	0.788024	0.615507	0.78337	0.779716	0.690041	0.767596	0.816576	0.671562	0.716675	0.694752	0.660609	0.706696	0.699218	0.654306	0.762313	0.674811	0.685352	0.764544	0.704755	0.688374	0.259298	0.288059	0.252555	0.270469	0.302768	0.266789	0.401612	0.462224	0.423421	0.440204	0.469036	0.456038	0.348832	0.353715	0.331635	0.352703	0.372537	0.345183	0.532616	0.539367	0.512637	0.544411	0.538726	0.548531
-45	0.763977	0.81665	0.649049	0.74998	0.822267	0.649289	0.757947	0.771557	0.653044	0.764103	0.810893	0.672192	0.759556	0.754728	0.685974	0.762293	0.730272	0.680309	0.728981	0.663392	0.677363	0.745834	0.678772	0.669937	0.26587	0.300519	0.266692	0.281492	0.322449	0.263729	0.451143	0.451368	0.446731	0.43724	0.513583	0.474	0.354119	0.371438	0.352893	0.3521	0.384644	0.349131	0.550203	0.534209	0.525228	0.530082	0.528962	0.557997
-44	0.742788	0.777449	0.643802	0.737786	0.810186	0.637551	0.746733	0.737867	0.660026	0.75064	0.756756	0.661028	0.764118	0.739924	0.676219	0.726957	0.733167	0.675864	0.71059	0.652452	0.672261	0.752587	0.637136	0.662335	0.275235	0.311171	0.28008	0.294384	0.3304	0.273994	0.430193	0.477457	0.463437	0.448433	0.496841	0.470731	0.365351	0.363529	0.341346	0.370039	0.391487	0.362589	0.512383	0.534422	0.54131	0.532365	0.542667	0.54883
-43	0.735811	0.769907	0.634115	0.743228	0.785395	0.625858	0.734816	0.749998	0.654255	0.746463	0.781893	0.651364	0.742003	0.709296	0.664968	0.743078	0.69747	0.660968	0.744864	0.665354	0.657021	0.728852	0.679214	0.6926	0.274078	0.299377	0.273069	0.282054	0.330982	0.287967	0.446913	0.48395	0.46368	0.458119	0.507042	0.473594	0.365291	0.364712	0.364267	0.38465	0.411799	0.373287	0.533626	0.541204	0.546285	0.539769	0.571224	0.537476
-42	0.754835	0.777438	0.644848	0.737329	0.791449	0.637375	0.700987	0.716363	0.628313	0.732985	0.722378	0.609443	0.752389	0.727869	0.657815	0.743399	0.721922	0.680235	0.704485	0.621241	0.650775	0.713479	0.637398	0.629031	0.295857	0.320029	0.282712	0.292779	0.338949	0.298117	0.435843	0.453795	0.442842	0.456289	0.486583	0.467778	0.384	0.393474	0.372345	0.384489	0.419162	0.375659	0.519029	0.511142	0.528432	0.543281	0.558362	0.545772
-41	0.732682	0.789204	0.640198	0.759342	0.79914	0.647196	0.705511	0.691022	0.623924	0.724952	0.702886	0.616798	0.73968	0.718502	0.669463	0.764717	0.71018	0.665333	0.667627	0.603558	0.613325	0.670912	0.653026	0.609843	0.285837	0.339623	0.282234	0.301284	0.346918	0.290863	0.468974	0.491991	0.471228	0.443864	0.505159	0.491883	0.39757	0.408255	0.369426	0.401726	0.425651	0.369063	0.54371	0.537309	0.556336	0.562767	0.544406	0.555561
-40	0.756698	0.777494	0.632099	0.743305	0.780582	0.648131	0.690235	0.684272	0.598816	0.678835	0.693149	0.593486	0.759242	0.71358	0.669326	0.740902	0.732256	0.671984	0.671561	0.617967	0.614546	0.668372	0.600249	0.619466	0.28247	0.31832	0.282634	0.298403	0.341485	0.288737	0.437447	0.485166	0.473195	0.480408	0.508606	0.477608	0.375521	0.379461	0.360304	0.389147	0.407634	0.370468	0.533652	0.546516	0.532679	0.544649	0.550187	0.549771
-39	0.738665	0.770295	0.635128	0.748957	0.767948	0.621991	0.673869	0.665097	0.579483	0.68083	0.687205	0.592516	0.728623	0.689096	0.659175	0.730617	0.680064	0.657328	0.668593	0.557395	0.596555	0.643373	0.600506	0.590275	0.292791	0.329327	0.290839	0.312744	0.361136	0.305043	0.479649	0.504048	0.48965	0.495776	0.54607	0.532421	0.396412	0.388307	0.374071	0.416029	0.423107	0.394743	0.556336	0.555592	0.555365	0.566612	0.581701	0.586877
-38	0.732864	0.753797	0.633342	0.720499	0.766681	0.624292	0.627131	0.600076	0.561371	0.647972	0.640744	0.546731	0.734354	0.686479	0.649238	0.717429	0.674516	0.642756	0.624889	0.538672	0.584121	0.623972	0.553725	0.584631	0.314196	0.340662	0.30498	0.326772	0.373988	0.333539	0.457251	0.465925	0.472711	0.469285	0.479196	0.501895	0.409861	0.418264	0.407636	0.413125	0.439485	0.407331	0.542201	0.531141	0.552262	0.525814	0.520705	0.560715
-37	0.733678	0.74926	0.651795	0.740089	0.768973	0.622386	0.634362	0.606079	0.545448	0.604538	0.604112	0.563087	0.731293	0.705057	0.65681	0.741365	0.692146	0.67266	0.632413	0.556881	0.577291	0.617305	0.545525	0.574232	0.312013	0.349266	0.303478	0.333921	0.369899	0.329342	0.484867	0.494196	0.5004	0.493853	0.53339	0.488816	0.412635	0.434285	0.401065	0.426729	0.454001	0.417923	0.552311	0.540528	0.557778	0.555394	0.566697	0.57237
-36	0.704439	0.720643	0.615647	0.715012	0.728404	0.606192	0.588921	0.568585	0.543171	0.598964	0.585641	0.512637	0.705546	0.647939	0.645952	0.706859	0.656886	0.625317	0.598834	0.518977	0.524204	0.572968	0.515311	0.537732	0.319976	0.355964	0.309809	0.326582	0.379128	0.31947	0.47699	0.475781	0.484774	0.496699	0.530937	0.516771	0.422533	0.424494	0.396806	0.423825	0.433746	0.413625	0.549792	0.529764	0.565867	0.571631	0.594465	0.553829
-35	0.714263	0.700824	0.615138	0.699372	0.705709	0.598361	0.624695	0.59693	0.564272	0.642767	0.636084	0.552613	0.712104	0.643707	0.635162	0.705046	0.638915	0.617317	0.624294	0.54238	0.568107	0.630472	0.544805	0.596937	0.330105	0.368187	0.315459	0.337949	0.399656	0.343437	0.471261	0.48929	0.497472	0.498959	0.544896	0.523932	0.434388	0.430197	0.415754	0.442286	0.458753	0.429904	0.570923	0.561213	0.587903	0.568388	0.573845	0.600556
-34	0.676691	0.669261	0.587943	0.670602	0.677447	0.581126	0.563543	0.538867	0.528529	0.58738	0.56114	0.505151	0.666039	0.625533	0.597911	0.659797	0.605054	0.608228	0.558372	0.481764	0.511515	0.546989	0.501	0.502567	0.338218	0.365143	0.32372	0.361812	0.40604	0.344343	0.480161	0.51259	0.495888	0.493267	0.533442	0.520966	0.430491	0.44074	0.427854	0.456269	0.469411	0.435164	0.554813	0.554422	0.554732	0.581595	0.566435	0.578726
-33	0.682369	0.66605	0.596789	0.676968	0.683688	0.584197	0.572653	0.529427	0.489928	0.581595	0.563813	0.507116	0.669132	0.627204	0.614688	0.677973	0.615737	0.609923	0.570487	0.476564	0.518317	0.560862	0.485108	0.525164	0.352275	0.39279	0.344996	0.369599	0.422949	0.363553	0.497343	0.521295	0.512706	0.535883	0.575863	0.552529	0.469923	0.458103	0.448951	0.474349	0.49989	0.45853	0.591255	0.61142	0.604268	0.60149	0.57571	0.609203
-32	0.651962	0.636796	0.568527	0.657435	0.636396	0.557702	0.553554	0.517341	0.486752	0.568193	0.513487	0.470546	0.652644	0.572608	0.580949	0.646356	0.566102	0.583605	0.527046	0.45359	0.489536	0.550147	0.474417	0.497908	0.353209	0.388684	0.345666	0.359601	0.419527	0.371953	0.519418	0.525945	0.510902	0.520783	0.532144	0.542999	0.465833	0.465897	0.437174	0.489424	0.491377	0.455762	0.596412	0.573888	0.579274	0.58144	0.592182	0.60157
-31	0.657169	0.631582	0.573423	0.660663	0.640503	0.574589	0.498224	0.47549	0.448593	0.522378	0.482403	0.433231	0.644309	0.579001	0.580605	0.636318	0.559558	0.597808	0.492067	0.425908	0.473491	0.496794	0.418698	0.477896	0.352894	0.385245	0.352455	0.370358	0.430192	0.369755	0.514166	0.525914	0.511261	0.517062	0.573428	0.522788	0.462889	0.462599	0.439153	0.479399	0.503433	0.468392	0.599101	0.577304	0.598505	0.601049	0.577179	0.586695
-30	0.615904	0.609177	0.560871	0.622458	0.610112	0.551486	0.491677	0.465634	0.449668	0.508724	0.482818	0.43587	0.612015	0.547125	0.579458	0.614411	0.543771	0.569898	0.479237	0.406521	0.447557	0.481121	0.426341	0.433799	0.348383	0.399766	0.345854	0.3742	0.408802	0.354566	0.550094	0.540708	0.541762	0.559974	0.565037	0.55099	0.471231	0.463183	0.440179	0.482495	0.493975	0.459048	0.609696	0.592214	0.612478	0.635043	0.621417	0.629411
-29	0.619487	0.575699	0.541943	0.596329	0.592265	0.542006	0.492896	0.496424	0.418346	0.493589	0.498859	0.442886	0.599639	0.527026	0.553201	0.590006	0.517905	0.563801	0.482068	0.388969	0.456926	0.497572	0.413446	0.457623	0.360079	0.430325	0.374515	0.388628	0.435759	0.385158	0.531679	0.568134	0.547592	0.564669	0.590146	0.583801	0.509012	0.495536	0.456901	0.509924	0.511737	0.480518	0.633139	0.59299	0.627026	0.633868	0.6183	0.631763
-28	0.557665	0.550036	0.506929	0.59285	0.559708	0.501563	0.468545	0.440559	0.441553	0.461172	0.440626	0.433733	0.569314	0.4872	0.524063	0.558943	0.483133	0.518169	0.469099	0.398912	0.452339	0.48535	0.398248	0.436647	0.380478	0.417891	0.372067	0.399122	0.45773	0.403869	0.571871	0.561797	0.55765	0.553817	0.576469	0.574922	0.516612	0.508444	0.481332	0.532315	0.544932	0.488412	0.637042	0.605733	0.644541	0.617035	0.60806	0.614416
-27	0.580625	0.544128	0.527033	0.573734	0.550338	0.514391	0.435507	0.437607	0.407502	0.451061	0.427292	0.413299	0.559764	0.490067	0.524065	0.57006	0.474523	0.529583	0.418569	0.340583	0.403446	0.44104	0.36857	0.412474	0.396398	0.42941	0.392071	0.406545	0.464027	0.400413	0.555221	0.587471	0.560381	0.551018	0.603016	0.576095	0.527328	0.528035	0.493545	0.524477	0.541843	0.494478	0.625711	0.595103	0.617043	0.631706	0.610206	0.604201
-26	0.543714	0.496989	0.503544	0.53067	0.502546	0.488327	0.407342	0.443083	0.427761	0.463935	0.45127	0.416557	0.52208	0.452695	0.500307	0.527097	0.44957	0.497435	0.454156	0.364315	0.410739	0.432851	0.377141	0.430732	0.397556	0.420712	0.37797	0.417158	0.458985	0.395593	0.523629	0.570238	0.523738	0.531897	0.576171	0.573481	0.515018	0.504311	0.476455	0.538771	0.532675	0.484306	0.607724	0.596611	0.603813	0.642014	0.632612	0.607738
-25	0.534306	0.499089	0.487341	0.525588	0.484343	0.474097	0.438585	0.381159	0.420339	0.411367	0.396059	0.403434	0.50765	0.439255	0.487644	0.511234	0.431716	0.489613	0.419004	0.333477	0.402328	0.413643	0.350169	0.403937	0.396081	0.432323	0.373784	0.41887	0.474723	0.403868	0.525141	0.534593	0.513224	0.524106	0.545361	0.55773	0.530305	0.518405	0.496037	0.539355	0.555656	0.493401	0.595677	0.573195	0.607896	0.583077	0.615388	0.571274
-24	0.530276	0.479574	0.478614	0.507378	0.467371	0.45833	0.412549	0.378644	0.395653	0.408338	0.391778	0.382167	0.495485	0.428571	0.477199	0.49043	0.426645	0.469826	0.407189	0.318502	0.409633	0.414497	0.334997	0.396836	0.42318	0.465614	0.396198	0.434185	0.499934	0.405747	0.544851	0.557658	0.540677	0.531906	0.564308	0.550944	0.550669	0.555424	0.509026	0.543824	0.587778	0.513265	0.622607	0.598132	0.612245	0.60586	0.613199	0.586862
-23	0.499719	0.454387	0.462592	0.491064	0.447036	0.459606	0.409832	0.37038	0.384108	0.389256	0.367001	0.38515	0.47395	0.40176	0.47001	0.470986	0.391668	0.465039	0.395856	0.326204	0.384272	0.378311	0.339843	0.407606	0.399107	0.432076	0.389258	0.426582	0.474327	0.40462	0.504735	0.518894	0.513537	0.522703	0.563875	0.525943	0.530023	0.520035	0.486595	0.538724	0.562654	0.500872	0.59685	0.573442	0.58244	0.592205	0.581432	0.567852
-22	0.483139	0.444389	0.458998	0.487907	0.432069	0.433714	0.389569	0.347894	0.371571	0.386809	0.343042	0.370302	0.463513	0.363133	0.453545	0.441873	0.383855	0.441231	0.351696	0.294165	0.362968	0.372121	0.294855	0.37061	0.403445	0.443721	0.391066	0.426404	0.492203	0.408435	0.510294	0.517668	0.513553	0.50744	0.548929	0.533218	0.539143	0.542105	0.495415	0.545072	0.553043	0.513955	0.561268	0.562748	0.57701	0.599806	0.561372	0.564038
-21	0.48094	0.437832	0.449904	0.472753	0.434061	0.462674	0.392417	0.375569	0.380554	0.405868	0.35621	0.368378	0.447341	0.377219	0.432936	0.454571	0.381934	0.444381	0.361969	0.301473	0.359326	0.371126	0.314343	0.372285	0.417659	0.468544	0.399088	0.449988	0.489088	0.411773	0.516343	0.524247	0.526459	0.54301	0.562787	0.529371	0.537125	0.546231	0.49961	0.540673	0.562448	0.508751	0.592083	0.576342	0.581513	0.569751	0.57752	0.557114
-20	0.466385	0.439018	0.456759	0.481096	0.432314	0.457172	0.338733	0.321375	0.331111	0.361729	0.331267	0.335007	0.446881	0.363433	0.44615	0.448587	0.385722	0.453963	0.316765	0.27682	0.329414	0.327404	0.290746	0.3276	0.401978	0.440977	0.379914	0.418154	0.471062	0.404884	0.548204	0.559941	0.55434	0.537204	0.592693	0.556647	0.516476	0.517299	0.47611	0.518176	0.547826	0.483305	0.587845	0.587563	0.591981	0.600975	0.608502	0.628184
-19	0.455258	0.413215	0.43578	0.462554	0.403882	0.437219	0.367225	0.319045	0.34041	0.351381	0.329799	0.346271	0.418116	0.353553	0.426012	0.407921	0.34979	0.418421	0.324422	0.271476	0.344127	0.337076	0.296529	0.334022	0.386992	0.420951	0.364682	0.412623	0.466823	0.381624	0.532897	0.54443	0.525737	0.5522	0.583266	0.54205	0.497684	0.500435	0.458655	0.508679	0.523348	0.473789	0.597726	0.562593	0.595944	0.604881	0.56374	0.568978
-18	0.448458	0.404324	0.41787	0.448033	0.39066	0.429336	0.346105	0.336781	0.340447	0.36139	0.320491	0.348713	0.406969	0.328001	0.406246	0.403448	0.333939	0.400709	0.306519	0.267075	0.323216	0.319903	0.280593	0.3279	0.400796	0.459417	0.4011	0.440008	0.49777	0.403655	0.53832	0.533365	0.544526	0.563774	0.589192	0.569429	0.549208	0.528968	0.497384	0.528502	0.554657	0.504275	0.5958	0.557462	0.588102	0.594687	0.577642	0.601845
-17	0.43765	0.405046	0.434949	0.449826	0.402433	0.422987	0.338551	0.31406	0.314594	0.344562	0.297507	0.326785	0.4009	0.333929	0.41137	0.39749	0.330168	0.429374	0.306236	0.237983	0.303011	0.305598	0.255071	0.314548	0.427159	0.432421	0.3877	0.428946	0.485959	0.401493	0.51934	0.520726	0.49914	0.523286	0.547293	0.536323	0.53226	0.514483	0.487443	0.530653	0.547592	0.475396	0.581079	0.567891	0.557475	0.573953	0.558895	0.575851
-16	0.430321	0.367196	0.40159	0.422915	0.372322	0.41995	0.345713	0.316786	0.330876	0.345735	0.29687	0.323965	0.375505	0.301252	0.392422	0.376141	0.305441	0.386059	0.316418	0.25048	0.313737	0.308861	0.255303	0.305099	0.42453	0.442787	0.380006	0.423722	0.480877	0.406249	0.528532	0.543755	0.506418	0.548536	0.551919	0.550377	0.521742	0.519557	0.469451	0.524792	0.534729	0.490372	0.571257	0.550462	0.556688	0.591816	0.556364	0.549726
-15	0.438521	0.378342	0.415254	0.422044	0.384702	0.415574	0.328792	0.283725	0.31653	0.318513	0.291558	0.316876	0.37915	0.313607	0.399974	0.38446	0.319108	0.391108	0.299998	0.220362	0.310182	0.303874	0.250034	0.30084	0.415481	0.451665	0.412648	0.44523	0.488463	0.432659	0.507595	0.521776	0.510464	0.525275	0.540815	0.522203	0.528233	0.537405	0.487172	0.531717	0.549602	0.485197	0.57013	0.523494	0.560904	0.580736	0.567556	0.545161
-14	0.414483	0.369762	0.417079	0.406328	0.355114	0.412243	0.335927	0.305778	0.323434	0.337625	0.290798	0.326793	0.377887	0.299179	0.377795	0.377847	0.30282	0.384118	0.294652	0.242229	0.305189	0.29529	0.248326	0.289088	0.425725	0.45726	0.401796	0.432597	0.490042	0.413392	0.520731	0.514135	0.526352	0.540015	0.56935	0.530569	0.52611	0.517706	0.484507	0.522862	0.547304	0.500652	0.566129	0.582499	0.5557	0.576777	0.556815	0.594106
-13	0.408957	0.355599	0.399867	0.391601	0.343613	0.383694	0.319731	0.284111	0.323666	0.333315	0.278628	0.327073	0.359825	0.276885	0.356309	0.353221	0.279246	0.360366	0.291851	0.238679	0.295781	0.281316	0.239333	0.305996	0.429138	0.454514	0.401329	0.433964	0.486606	0.41751	0.534184	0.528204	0.504224	0.523698	0.521531	0.497662	0.521068	0.509313	0.483518	0.51382	0.534227	0.488673	0.564782	0.528014	0.524873	0.565095	0.543053	0.544883
-12	0.387232	0.328175	0.38075	0.379254	0.322689	0.378502	0.296997	0.276234	0.306543	0.307761	0.276715	0.3001	0.32364	0.266264	0.340139	0.326317	0.267326	0.339746	0.249517	0.215734	0.271087	0.266236	0.220011	0.272206	0.420529	0.460566	0.418861	0.442006	0.506447	0.425514	0.536546	0.528545	0.502457	0.535083	0.565252	0.511028	0.551767	0.54707	0.497993	0.556874	0.535695	0.512773	0.559575	0.534113	0.56088	0.542654	0.531842	0.53445
-11	0.367387	0.324428	0.391344	0.364353	0.322514	0.379918	0.300336	0.248538	0.302831	0.306646	0.269547	0.307628	0.318751	0.261959	0.345698	0.332423	0.271564	0.333714	0.259747	0.205202	0.259115	0.257126	0.211933	0.276258	0.451644	0.468255	0.420123	0.464934	0.509802	0.435589	0.535413	0.527308	0.508453	0.53034	0.551866	0.517657	0.560301	0.542828	0.508031	0.566736	0.555692	0.504874	0.56044	0.536522	0.553004	0.567588	0.559792	0.555236
-10	0.344699	0.285273	0.345168	0.340418	0.27642	0.3349	0.255549	0.22747	0.267467	0.253197	0.236536	0.254862	0.284642	0.231693	0.308871	0.284089	0.229557	0.304762	0.236036	0.18158	0.235741	0.214679	0.205562	0.236087	0.464604	0.489392	0.429199	0.472893	0.515912	0.448409	0.534994	0.534212	0.534173	0.558913	0.552403	0.528258	0.543356	0.556378	0.513575	0.575376	0.572302	0.518653	0.588906	0.554209	0.572324	0.603282	0.561725	0.579885
-9	0.388611	0.325956	0.377122	0.373112	0.330714	0.38375	0.315827	0.264564	0.293995	0.308193	0.268762	0.308987	0.315982	0.257351	0.341349	0.316902	0.256975	0.341958	0.256434	0.216636	0.281985	0.275991	0.237859	0.288254	0.455	0.488362	0.43349	0.468448	0.522226	0.450709	0.548364	0.530929	0.519842	0.55247	0.553305	0.525324	0.560705	0.541728	0.514351	0.585038	0.551265	0.520345	0.594758	0.537908	0.560119	0.577709	0.561022	0.566412
-8	0.367086	0.318261	0.384147	0.375838	0.306985	0.363609	0.273129	0.274593	0.29985	0.286157	0.269919	0.29368	0.307323	0.23637	0.335366	0.314322	0.25167	0.337105	0.245932	0.213264	0.279132	0.258031	0.213689	0.272704	0.510765	0.540768	0.486439	0.52453	0.564176	0.483967	0.539455	0.553737	0.524172	0.544376	0.548376	0.53733	0.631562	0.579869	0.550439	0.626003	0.627967	0.576498	0.585639	0.540837	0.551982	0.575037	0.558613	0.557496
-7	0.343329	0.295603	0.34341	0.323482	0.283203	0.35375	0.264303	0.23716	0.2802	0.268324	0.219152	0.272274	0.27445	0.225044	0.303497	0.281479	0.227463	0.303662	0.22559	0.197709	0.243967	0.225494	0.194516	0.245271	0.428382	0.44537	0.401668	0.447481	0.466935	0.407884	0.475446	0.484509	0.466375	0.476578	0.486736	0.488252	0.527477	0.492807	0.475167	0.518814	0.510385	0.474846	0.512742	0.484168	0.510777	0.521988	0.489348	0.481185
-6	0.357508	0.301612	0.356506	0.374012	0.296771	0.371775	0.306553	0.270044	0.300629	0.309544	0.265619	0.327472	0.287183	0.242029	0.327489	0.297809	0.243198	0.329331	0.259708	0.212804	0.269586	0.26142	0.215118	0.285491	0.453589	0.459582	0.425232	0.468079	0.486371	0.425288	0.493486	0.45443	0.462298	0.48263	0.467856	0.439906	0.538201	0.51382	0.487075	0.532272	0.520907	0.492146	0.526387	0.482384	0.50259	0.489275	0.472871	0.47674
-5	0.378348	0.326856	0.386018	0.387801	0.3201	0.393084	0.295727	0.266815	0.338615	0.294356	0.265531	0.333877	0.321499	0.261171	0.351337	0.318412	0.257535	0.342084	0.246525	0.210746	0.285297	0.270949	0.210234	0.29436	0.520324	0.528668	0.482144	0.532276	0.552804	0.484007	0.535482	0.518552	0.516202	0.539587	0.532795	0.478722	0.622231	0.590307	0.561505	0.628253	0.595848	0.574564	0.571052	0.525673	0.521523	0.555269	0.550772	0.550221
-4	0.35105	0.300099	0.365023	0.350233	0.301225	0.359756	0.306967	0.265115	0.320185	0.287382	0.281599	0.299944	0.28153	0.23729	0.323898	0.278646	0.234259	0.314465	0.244439	0.202972	0.279375	0.267371	0.218007	0.270784	0.451328	0.458912	0.422264	0.465333	0.466217	0.424556	0.469934	0.451378	0.465176	0.503919	0.477589	0.440539	0.546755	0.52186	0.488498	0.538836	0.512182	0.49469	0.518443	0.468061	0.463157	0.520997	0.459478	0.47876
-3	0.409617	0.340103	0.414503	0.403108	0.346708	0.425528	0.33664	0.283794	0.32384	0.336671	0.284604	0.359443	0.323587	0.270137	0.360575	0.33054	0.263541	0.370278	0.268881	0.230678	0.305178	0.28501	0.226433	0.302629	0.445463	0.425452	0.410723	0.436182	0.456957	0.416367	0.483463	0.453458	0.475795	0.479344	0.480941	0.463918	0.528086	0.482216	0.474611	0.507792	0.490981	0.47687	0.516561	0.461838	0.493006	0.496562	0.457144	0.491582
-2	0.279659	0.250531	0.304808	0.298389	0.252201	0.300763	0.250894	0.2212	0.263898	0.257499	0.222952	0.268038	0.229346	0.191674	0.256893	0.2288	0.193829	0.262981	0.202856	0.171158	0.230185	0.206717	0.189703	0.239373	0.422508	0.407325	0.392151	0.422576	0.440118	0.401995	0.501065	0.45247	0.467715	0.473335	0.472344	0.457424	0.498839	0.463248	0.460075	0.510635	0.451354	0.467009	0.505105	0.448593	0.467794	0.493905	0.438258	0.482166
-1	0.334367	0.280179	0.355688	0.328183	0.276175	0.35242	0.292417	0.262756	0.288957	0.264231	0.237373	0.291838	0.267797	0.219634	0.29895	0.261157	0.220244	0.302775	0.221936	0.178397	0.257699	0.223899	0.19952	0.25823	0.451505	0.436085	0.434584	0.471809	0.478242	0.447473	0.475005	0.440039	0.441822	0.493752	0.480294	0.455552	0.525621	0.49902	0.497962	0.530619	0.506475	0.502695	0.495801	0.455784	0.469597	0.501693	0.458789	0.483469
0	0.32926	0.284955	0.343397	0.322547	0.263749	0.343715	0.265063	0.221372	0.276741	0.271875	0.226497	0.293723	0.256385	0.211159	0.288119	0.249793	0.209242	0.294165	0.205008	0.168451	0.243709	0.230912	0.189704	0.243349	0.538629	0.541784	0.495126	0.549932	0.565585	0.518672	0.588026	0.563286	0.558366	0.61461	0.584981	0.565405	0.630242	0.571103	0.570459	0.638355	0.594126	0.586419	0.612365	0.571191	0.587825	0.60404	0.56018	0.600012
1	0.301224	0.245471	0.306154	0.281645	0.239504	0.323981	0.217182	0.202475	0.244603	0.23482	0.214037	0.262352	0.219753	0.193623	0.259237	0.237772	0.193043	0.269546	0.18726	0.169233	0.206861	0.17838	0.159467	0.204359	0.487265	0.494409	0.457433	0.490981	0.506302	0.467892	0.518011	0.501591	0.513323	0.535273	0.513213	0.510935	0.55703	0.518713	0.504564	0.546718	0.523659	0.51693	0.568535	0.494201	0.509986	0.536083	0.489308	0.523827
2	0.296742	0.254241	0.297284	0.285771	0.244887	0.309227	0.243859	0.216631	0.253459	0.258569	0.195134	0.258532	0.219615	0.183961	0.262069	0.225856	0.18809	0.260319	0.185621	0.164263	0.204392	0.174161	0.175028	0.196749	0.35947	0.373069	0.359811	0.386452	0.375713	0.372828	0.422772	0.399596	0.40585	0.423252	0.422977	0.408613	0.42913	0.387533	0.410578	0.417478	0.393346	0.400478	0.426259	0.373229	0.40726	0.412857	0.395852	0.438663
3	0.283971	0.231167	0.300415	0.273026	0.229249	0.302086	0.207503	0.199373	0.239036	0.221252	0.196406	0.238016	0.208051	0.183083	0.24238	0.212217	0.183551	0.252828	0.176366	0.145879	0.198409	0.165569	0.144235	0.210757	0.521599	0.524849	0.519179	0.544878	0.549016	0.519467	0.565472	0.543521	0.547549	0.550585	0.55491	0.576625	0.597295	0.545849	0.559829	0.618656	0.570133	0.574207	0.565205	0.50302	0.561861	0.578786	0.522278	0.546214
4	0.278539	0.236469	0.30584	0.283913	0.232513	0.308543	0.230572	0.22167	0.256774	0.243543	0.209147	0.266339	0.20726	0.176987	0.242475	0.213456	0.179362	0.250447	0.189493	0.171445	0.219496	0.202413	0.173731	0.215277	0.448076	0.425806	0.418499	0.435678	0.447819	0.434911	0.495947	0.464988	0.460476	0.491897	0.464918	0.474137	0.492355	0.457978	0.466841	0.494542	0.456311	0.469549	0.499967	0.432895	0.480538	0.499847	0.456818	0.483283
5	0.285203	0.244283	0.306684	0.288408	0.228887	0.303566	0.247466	0.220995	0.277846	0.251245	0.21226	0.254239	0.21227	0.18415	0.261858	0.220188	0.184628	0.243467	0.187692	0.177587	0.220623	0.20856	0.175814	0.227755	0.512101	0.487661	0.477132	0.500156	0.505908	0.495862	0.542156	0.505478	0.537502	0.552239	0.502769	0.527191	0.549507	0.513126	0.524207	0.546343	0.509708	0.53153	0.56042	0.519691	0.528057	0.561888	0.497599	0.546355
6	0.263833	0.235081	0.289839	0.273337	0.222573	0.298307	0.223176	0.180254	0.24511	0.220298	0.190474	0.246714	0.200811	0.178598	0.230475	0.200774	0.170779	0.241284	0.174031	0.162584	0.200628	0.18223	0.144779	0.196435	0.457072	0.433828	0.436843	0.456371	0.454031	0.446291	0.478214	0.466236	0.473267	0.469918	0.452884	0.472953	0.486526	0.450852	0.469237	0.494159	0.462294	0.478796	0.487989	0.442676	0.46801	0.495291	0.440414	0.459199
7	0.270694	0.228717	0.291262	0.262825	0.2249	0.284304	0.221922	0.190947	0.21721	0.20822	0.190052	0.244923	0.193	0.171674	0.23013	0.207822	0.172754	0.236193	0.161207	0.147707	0.195943	0.157525	0.153319	0.184089	0.415833	0.402913	0.406501	0.427685	0.396055	0.399631	0.458796	0.429695	0.434005	0.436276	0.440373	0.448169	0.452681	0.403134	0.416833	0.448214	0.410544	0.430737	0.431965	0.388486	0.45184	0.440169	0.401612	0.440329
8	0.252434	0.21407	0.282641	0.252478	0.20721	0.283643	0.213608	0.191415	0.256688	0.215545	0.194055	0.231939	0.197111	0.162431	0.223092	0.189642	0.151409	0.228339	0.165485	0.14574	0.195294	0.177421	0.147784	0.199922	0.450326	0.416127	0.41341	0.441047	0.429622	0.426085	0.459177	0.412051	0.453624	0.433719	0.412329	0.420357	0.477524	0.427333	0.460974	0.454172	0.431712	0.446939	0.44912	0.386478	0.425074	0.425522	0.390185	0.425487
9	0.245794	0.207952	0.269923	0.252508	0.207377	0.268314	0.213632	0.206261	0.236623	0.224546	0.199282	0.246663	0.17563	0.154195	0.21207	0.168545	0.157058	0.21076	0.164421	0.158564	0.199856	0.161893	0.164901	0.19312	0.436192	0.435184	0.412548	0.460203	0.428445	0.438693	0.463695	0.426223	0.450539	0.449707	0.450612	0.417835	0.467508	0.431239	0.446251	0.494652	0.433002	0.452174	0.457544	0.418161	0.43034	0.430234	0.386112	0.430245
10	0.249167	0.21354	0.271897	0.254849	0.199588	0.272773	0.200332	0.184367	0.226305	0.205083	0.18182	0.212239	0.1745	0.152304	0.213369	0.187312	0.155201	0.211996	0.150089	0.13115	0.177205	0.160775	0.143887	0.179912	0.386224	0.369752	0.370257	0.378201	0.369834	0.370406	0.390679	0.362084	0.399613	0.403828	0.357314	0.381663	0.406759	0.359126	0.395524	0.397977	0.362762	0.390417	0.373538	0.36535	0.399952	0.381721	0.34541	0.391466
11	0.240945	0.198905	0.271046	0.234272	0.192635	0.262518	0.18828	0.157321	0.222423	0.18468	0.167363	0.21579	0.165871	0.149346	0.198926	0.173242	0.151441	0.211195	0.132984	0.122431	0.159199	0.152373	0.126458	0.163985	0.404204	0.389295	0.395362	0.40945	0.397167	0.398279	0.404739	0.365851	0.404422	0.389716	0.381833	0.370236	0.438807	0.385225	0.4142	0.430129	0.394811	0.41861	0.388268	0.348312	0.380032	0.387804	0.362606	0.362744
12	0.23913	0.20576	0.266699	0.232322	0.19866	0.269955	0.201492	0.168227	0.22088	0.19762	0.169077	0.209063	0.160662	0.143703	0.199299	0.163302	0.144827	0.202581	0.144585	0.121111	0.16329	0.154722	0.136789	0.188104	0.377162	0.366667	0.372383	0.383297	0.373455	0.376875	0.38732	0.353549	0.383012	0.370579	0.35678	0.368359	0.398718	0.353031	0.392953	0.389802	0.368739	0.408196	0.367035	0.332995	0.38324	0.375191	0.338639	0.368489
13	0.229296	0.184047	0.25869	0.217013	0.180801	0.257079	0.172121	0.153303	0.202768	0.180158	0.1561	0.21049	0.153846	0.139707	0.193174	0.151101	0.134775	0.192201	0.134195	0.132781	0.157111	0.135718	0.120727	0.153829	0.396256	0.375897	0.395586	0.392287	0.367424	0.375565	0.383989	0.373089	0.391741	0.397447	0.360205	0.386734	0.413953	0.377442	0.409354	0.406963	0.369399	0.40305	0.363916	0.338684	0.357724	0.360137	0.348529	0.352634
14	0.230399	0.18541	0.250684	0.220326	0.179773	0.256667	0.180936	0.160915	0.20095	0.174716	0.146211	0.207219	0.154647	0.139717	0.188424	0.159709	0.131917	0.191999	0.139672	0.128042	0.167298	0.137617	0.120982	0.158313	0.398848	0.383963	0.387779	0.393627	0.369226	0.371132	0.421348	0.365878	0.420253	0.39926	0.357704	0.427793	0.407233	0.367928	0.39702	0.418941	0.367247	0.393838	0.398178	0.363805	0.390322	0.373453	0.347476	0.417126
15	0.218113	0.184352	0.253931	0.22283	0.179311	0.251319	0.171322	0.146146	0.20239	0.18281	0.147643	0.195624	0.149211	0.134865	0.186749	0.154004	0.128966	0.1826	0.124227	0.107971	0.152163	0.131752	0.124383	0.159069	0.384024	0.345943	0.369045	0.377612	0.355282	0.37319	0.428	0.384091	0.406945	0.411893	0.398479	0.396392	0.38274	0.338743	0.383433	0.374859	0.342071	0.37292	0.398182	0.353072	0.393186	0.393081	0.351947	0.388987
16	0.215542	0.174419	0.246993	0.20162	0.17865	0.248364	0.174792	0.156602	0.207196	0.191711	0.167391	0.223471	0.141985	0.129364	0.16832	0.141915	0.122511	0.174037	0.143024	0.112985	0.151724	0.132015	0.122411	0.165384	0.404025	0.375964	0.401722	0.40865	0.38774	0.417483	0.415534	0.395632	0.426724	0.440631	0.391128	0.403826	0.413891	0.38054	0.402658	0.422139	0.369812	0.426478	0.399102	0.350092	0.396748	0.38952	0.334097	0.385761
17	0.203967	0.172597	0.249325	0.208036	0.166796	0.23556	0.178345	0.151551	0.196682	0.186813	0.139696	0.201345	0.139843	0.135561	0.1799	0.14225	0.130601	0.17505	0.11842	0.117723	0.1338	0.130446	0.110367	0.142914	0.363629	0.34937	0.367165	0.378863	0.348148	0.371857	0.346173	0.349745	0.350349	0.358177	0.331922	0.343094	0.376986	0.34172	0.378879	0.378431	0.34223	0.367215	0.33783	0.330732	0.340969	0.335275	0.308377	0.343703
18	0.220217	0.180106	0.257038	0.205168	0.169091	0.242804	0.175771	0.156604	0.198828	0.171896	0.139719	0.207545	0.148174	0.130314	0.177292	0.140332	0.125628	0.173862	0.127909	0.111069	0.140959	0.141203	0.101144	0.144814	0.362136	0.357136	0.368582	0.365383	0.34542	0.352637	0.371887	0.349299	0.373499	0.382865	0.380931	0.392422	0.374836	0.347281	0.373732	0.364723	0.336226	0.368809	0.371444	0.35169	0.366774	0.367497	0.3475	0.383519
19	0.206368	0.171846	0.240476	0.204514	0.175811	0.234974	0.16574	0.138753	0.193081	0.172142	0.138335	0.197764	0.141516	0.12651	0.163842	0.137949	0.117972	0.171993	0.109727	0.105484	0.145059	0.11749	0.0968272	0.141684	0.356032	0.341313	0.367043	0.376974	0.334263	0.364799	0.351792	0.340475	0.367076	0.382989	0.343813	0.371036	0.375024	0.313421	0.375025	0.364959	0.330957	0.36134	0.347784	0.334672	0.360541	0.3465	0.316253	0.335138
20	0.199259	0.172136	0.239533	0.209584	0.157928	0.235729	0.171507	0.158634	0.204553	0.162347	0.144889	0.206624	0.134747	0.131723	0.169552	0.138683	0.121627	0.170471	0.116004	0.100418	0.143891	0.126461	0.111871	0.148227	0.363028	0.332474	0.361024	0.365357	0.326654	0.351445	0.383434	0.357261	0.367975	0.356466	0.332525	0.357882	0.346101	0.314796	0.35074	0.357099	0.317781	0.357818	0.355265	0.31213	0.344336	0.342714	0.314542	0.328449
21	0.200475	0.16735	0.237238	0.200949	0.161251	0.221238	0.153559	0.143632	0.177018	0.158423	0.132778	0.191854	0.132013	0.113985	0.164346	0.126695	0.115684	0.161978	0.120762	0.104879	0.13617	0.109965	0.095176	0.142862	0.355064	0.34106	0.35547	0.357049	0.326164	0.339428	0.387856	0.360468	0.370322	0.367414	0.338341	0.382175	0.347189	0.313551	0.357582	0.340051	0.309705	0.355307	0.339969	0.320445	0.357185	0.346565	0.317349	0.342484
22	0.198629	0.161185	0.232688	0.193302	0.153593	0.221734	0.171448	0.137985	0.185267	0.148769	0.134152	0.17726	0.123124	0.120243	0.161422	0.121934	0.122236	0.157985	0.110694	0.10514	0.141135	0.123377	0.0987388	0.130239	0.33698	0.32861	0.343645	0.346354	0.323698	0.350638	0.353235	0.350177	0.361679	0.356613	0.327636	0.332697	0.349552	0.32	0.346885	0.335923	0.30364	0.3568	0.343055	0.324393	0.326808	0.329887	0.302009	0.336586
23	0.181622	0.160419	0.219231	0.18512	0.147233	0.221917	0.15358	0.133994	0.193629	0.155907	0.140803	0.187523	0.126181	0.106925	0.159192	0.127027	0.107596	0.151558	0.105435	0.095051	0.132101	0.0989465	0.110441	0.130302	0.341239	0.329182	0.34635	0.336856	0.309567	0.337256	0.348833	0.341418	0.355344	0.346109	0.306335	0.349504	0.330562	0.316283	0.34638	0.33432	0.305734	0.348575	0.333592	0.305521	0.351825	0.324543	0.295639	0.345988
24	0.187765	0.164758	0.228618	0.187341	0.152396	0.22106	0.150333	0.137097	0.176369	0.153234	0.130258	0.178106	0.125977	0.104124	0.157073	0.128169	0.107521	0.152972	0.109226	0.0951083	0.129582	0.114302	0.103634	0.133603	0.351432	0.323229	0.340819	0.347441	0.317156	0.341771	0.354626	0.330106	0.357495	0.357765	0.331682	0.368692	0.342231	0.30357	0.342722	0.318069	0.300346	0.34474	0.334542	0.32461	0.324403	0.312992	0.2911	0.332791
25	0.186254	0.147497	0.224195	0.17767	0.143462	0.223244	0.155145	0.135348	0.187211	0.150612	0.112881	0.18158	0.116558	0.110538	0.148344	0.119236	0.10943	0.149702	0.0982212	0.09066	0.12757	0.110848	0.0830756	0.130592	0.335562	0.333014	0.334898	0.344837	0.331792	0.336868	0.348943	0.333723	0.358644	0.347558	0.325314	0.359158	0.335701	0.297519	0.344284	0.318178	0.309676	0.349539	0.316877	0.289691	0.328203	0.33014	0.29844	0.32411
26	0.188234	0.156604	0.216701	0.1784	0.144158	0.219456	0.154617	0.114225	0.178414	0.147608	0.122655	0.173814	0.118487	0.110063	0.149335	0.119774	0.109665	0.149414	0.104198	0.101408	0.122389	0.109693	0.0940097	0.1259	0.342535	0.312831	0.35295	0.340032	0.305615	0.326798	0.329684	0.319996	0.347754	0.338019	0.311077	0.336966	0.334354	0.295324	0.330616	0.319001	0.289402	0.329553	0.316484	0.294567	0.319603	0.302615	0.288	0.312402
27	0.168785	0.15285	0.213748	0.181397	0.142481	0.209202	0.143845	0.120823	0.17583	0.150061	0.122235	0.174706	0.112409	0.10446	0.145033	0.119731	0.111726	0.14756	0.0963476	0.0927278	0.12034	0.0942786	0.0817195	0.122682	0.336985	0.320537	0.350451	0.344375	0.309905	0.336846	0.337559	0.303761	0.343896	0.328841	0.319059	0.336051	0.325018	0.296279	0.337414	0.333949	0.30374	0.341349	0.300417	0.286846	0.304753	0.299691	0.273936	0.29516
28	0.170991	0.148674	0.214123	0.175456	0.140192	0.208941	0.133949	0.125014	0.18785	0.139171	0.110302	0.159412	0.109984	0.104261	0.151627	0.120391	0.108336	0.137789	0.0944607	0.0972249	0.107962	0.0996858	0.0896047	0.118117	0.32898	0.314195	0.358008	0.337731	0.316364	0.345688	0.336291	0.30147	0.350612	0.338223	0.296008	0.31732	0.317553	0.296178	0.340031	0.323372	0.282704	0.335907	0.290732	0.306233	0.314952	0.296369	0.296868	0.319426
29	0.17361	0.141977	0.207519	0.166504	0.133561	0.204032	0.143918	0.116153	0.172614	0.136263	0.0997112	0.159851	0.104472	0.104572	0.139956	0.110326	0.0948775	0.143548	0.088892	0.0857212	0.120779	0.0900343	0.0881605	0.116131	0.333243	0.305766	0.32633	0.332834	0.309766	0.334846	0.308186	0.311258	0.329684	0.312024	0.288874	0.3113	0.30879	0.290306	0.329986	0.308332	0.289511	0.321463	0.280919	0.286999	0.310524	0.274328	0.277256	0.287413
30	0.174227	0.144077	0.206288	0.1674	0.141657	0.201321	0.147507	0.118365	0.166878	0.122166	0.110496	0.158684	0.106528	0.104423	0.140659	0.10794	0.100369	0.139763	0.0953003	0.0812215	0.115166	0.103856	0.0870052	0.123749	0.31881	0.296796	0.333796	0.326912	0.299024	0.333667	0.298478	0.305585	0.320183	0.317036	0.291758	0.326134	0.316108	0.280544	0.31678	0.301291	0.281655	0.314314	0.271723	0.282579	0.282473	0.272638	0.257203	0.304981
31	0.165534	0.135887	0.203435	0.166117	0.134011	0.198337	0.134043	0.119994	0.170286	0.125008	0.123125	0.169482	0.105846	0.0990404	0.1315	0.108344	0.101047	0.124034	0.0925273	0.0840108	0.116054	0.086618	0.0922383	0.129289	0.32493	0.300132	0.331174	0.316763	0.288635	0.321789	0.318019	0.30725	0.324192	0.307585	0.272484	0.320254	0.298934	0.279752	0.330325	0.295381	0.28303	0.318276	0.262145	0.269009	0.268735	0.274604	0.259551	0.290424
32	0.161093	0.139896	0.203888	0.16421	0.129243	0.207012	0.149949	0.118158	0.17744	0.134517	0.12391	0.182672	0.10558	0.0982956	0.13609	0.102226	0.0962723	0.122663	0.0967206	0.094111	0.114669	0.094858	0.0900096	0.109672	0.316984	0.300699	0.33431	0.311663	0.293988	0.31844	0.293928	0.27847	0.305558	0.292428	0.276036	0.296519	0.30138	0.282046	0.308048	0.293274	0.27033	0.321349	0.273641	0.253214	0.28487	0.265003	0.246131	0.273226
33	0.167716	0.129446	0.199416	0.149876	0.123878	0.198705	0.132936	0.114878	0.164419	0.141368	0.107647	0.161667	0.0978199	0.096018	0.129445	0.104822	0.096976	0.127049	0.0819707	0.092492	0.105095	0.0957561	0.0771501	0.117224	0.322964	0.304272	0.32543	0.317332	0.304265	0.317889	0.310789	0.283276	0.301584	0.296624	0.280788	0.295372	0.294875	0.281355	0.320243	0.291397	0.278573	0.309128	0.27055	0.258748	0.281962	0.257778	0.256918	0.269827
34	0.160226	0.136381	0.196788	0.15249	0.128828	0.201437	0.139495	0.123879	0.16768	0.131546	0.114642	0.165273	0.0986429	0.0977472	0.132021	0.107506	0.0966862	0.126838	0.0873402	0.0759349	0.104801	0.0991473	0.0721012	0.110209	0.290616	0.276236	0.29921	0.283399	0.268707	0.302481	0.305843	0.295149	0.303943	0.290944	0.289136	0.301547	0.268792	0.255802	0.29341	0.26344	0.251032	0.279053	0.26897	0.258443	0.26922	0.265254	0.24163	0.266165
35	0.168636	0.131699	0.208187	0.157825	0.123753	0.197244	0.119293	0.110069	0.155567	0.124832	0.11817	0.159351	0.104025	0.093951	0.128168	0.104448	0.0952064	0.128718	0.0904828	0.0648791	0.105923	0.0803325	0.0757743	0.111712	0.316934	0.299084	0.321578	0.316182	0.292657	0.310433	0.283699	0.278085	0.297735	0.287779	0.272283	0.288154	0.280277	0.263184	0.295276	0.281808	0.256491	0.295049	0.253519	0.240568	0.272104	0.256991	0.253678	0.258273
36	0.16608	0.135931	0.202997	0.155868	0.12671	0.194141	0.121421	0.1196	0.170483	0.134536	0.107956	0.166422	0.100565	0.0981499	0.127144	0.103422	0.102609	0.124503	0.0863312	0.0881623	0.0994614	0.0908267	0.083035	0.100453	0.304825	0.265719	0.300653	0.285498	0.268422	0.291482	0.280429	0.270923	0.290007	0.27649	0.268352	0.288126	0.267183	0.239475	0.277728	0.267751	0.240036	0.273951	0.244634	0.248683	0.254781	0.247453	0.235631	0.252912
37	0.155514	0.134439	0.1972	0.15174	0.118101	0.198433	0.130711	0.104235	0.153276	0.116799	0.0995784	0.158182	0.098794	0.103929	0.128796	0.101073	0.0926635	0.125772	0.0805497	0.0759309	0.0991197	0.0775345	0.0723613	0.0998415	0.293859	0.272609	0.304792	0.285457	0.262554	0.299761	0.290002	0.291229	0.27332	0.277844	0.263583	0.307898	0.264584	0.249914	0.279742	0.257428	0.251428	0.276882	0.267522	0.233827	0.270337	0.245278	0.240845	0.260606
38	0.142345	0.122312	0.187075	0.139508	0.11518	0.18538	0.136377	0.118952	0.17073	0.13946	0.110592	0.166831	0.0972304	0.0924085	0.123856	0.1053	0.0891675	0.119703	0.0828812	0.0865122	0.108809	0.0951706	0.0870372	0.112293	0.28907	0.26688	0.302502	0.284611	0.257328	0.296323	0.277957	0.269788	0.265908	0.264958	0.243949	0.26395	0.251949	0.237489	0.273479	0.256124	0.234213	0.264277	0.235608	0.247064	0.251911	0.241423	0.232259	0.247162
39	0.160526	0.122893	0.198115	0.147147	0.116175	0.192714	0.131805	0.107511	0.165326	0.137633	0.107279	0.165924	0.093518	0.0918576	0.126856	0.0951787	0.0924203	0.118202	0.0896575	0.0814639	0.110508	0.0927017	0.0811883	0.103306	0.290779	0.277843	0.300885	0.291139	0.265911	0.296887	0.245524	0.248644	0.271275	0.26107	0.241691	0.263663	0.255034	0.245831	0.270901	0.257718	0.234875	0.267753	0.229686	0.217017	0.233744	0.232615	0.227543	0.249788
40	0.145644	0.127207	0.190674	0.143502	0.116866	0.191526	0.130518	0.0975978	0.155317	0.128629	0.104314	0.159744	0.0913736	0.094823	0.126654	0.0946098	0.0841783	0.11489	0.0809485	0.0752378	0.0997426	0.0805705	0.0773301	0.0967145	0.295669	0.276552	0.303792	0.285361	0.270469	0.29713	0.262539	0.265644	0.281298	0.262263	0.266003	0.265226	0.257934	0.242195	0.277539	0.269795	0.248624	0.26943	0.229492	0.245835	0.233296	0.24004	0.211555	0.238472
41	0.145675	0.1344	0.195161	0.134002	0.11572	0.189533	0.122854	0.112816	0.158199	0.119604	0.102978	0.156104	0.0943613	0.0961809	0.117624	0.0961628	0.0891994	0.118891	0.0891717	0.0843164	0.0981808	0.0878682	0.083577	0.0957742	0.283038	0.274726	0.304576	0.280515	0.263415	0.298659	0.277843	0.253836	0.269576	0.267713	0.254374	0.264149	0.254274	0.242267	0.274363	0.254123	0.22807	0.252107	0.243708	0.239889	0.246121	0.22472	0.233994	0.239521
42	0.143573	0.130316	0.187857	0.145532	0.119756	0.19404	0.122259	0.106915	0.152765	0.11344	0.0907574	0.152032	0.0957375	0.0925441	0.111255	0.0935658	0.0885377	0.121578	0.0758428	0.0762328	0.0912007	0.0854627	0.0766633	0.0957102	0.286199	0.261044	0.29731	0.285301	0.263112	0.28218	0.271401	0.270823	0.276317	0.269778	0.251101	0.278852	0.246271	0.235289	0.27278	0.247761	0.232575	0.260706	0.25255	0.255032	0.25321	0.239919	0.230164	0.229958
43	0.135909	0.116184	0.186513	0.129685	0.115656	0.176275	0.127301	0.100191	0.162122	0.121405	0.107875	0.159477	0.0987981	0.0827409	0.115783	0.0866385	0.0887269	0.112659	0.0850063	0.0770502	0.114977	0.0904335	0.0752513	0.110703	0.288761	0.276452	0.296729	0.28492	0.260283	0.28648	0.284416	0.249955	0.292852	0.263235	0.264245	0.283073	0.245946	0.244536	0.266158	0.246084	0.233777	0.266553	0.242461	0.244761	0.240696	0.235578	0.232014	0.25029
44	0.140027	0.116159	0.187886	0.136241	0.115469	0.185155	0.119398	0.105667	0.154717	0.116113	0.107573	0.159115	0.0875351	0.0917324	0.11296	0.0913874	0.0926353	0.116812	0.0808754	0.0726591	0.0962317	0.0847244	0.0686625	0.104637	0.297142	0.279707	0.302024	0.282011	0.25851	0.297043	0.265138	0.259178	0.283501	0.261311	0.248011	0.257187	0.261062	0.244206	0.269627	0.257455	0.249281	0.265594	0.241812	0.234724	0.23792	0.231997	0.221315	0.22944
45	0.145637	0.125015	0.186966	0.142948	0.121265	0.191549	0.118916	0.101735	0.151248	0.099619	0.105242	0.156661	0.0909884	0.0936794	0.117915	0.0953532	0.0897758	0.116845	0.0724262	0.0711598	0.0979151	0.0669867	0.0695072	0.0979991	0.277594	0.256603	0.290393	0.277215	0.258361	0.273672	0.282415	0.253189	0.257292	0.266273	0.236838	0.252832	0.236282	0.232836	0.25454	0.238936	0.222334	0.247285	0.237472	0.231835	0.225144	0.237521	0.223729	0.232854
46	0.141339	0.124885	0.186065	0.133895	0.115815	0.179091	0.119749	0.100284	0.146211	0.1119	0.092267	0.145943	0.0865635	0.0843058	0.117344	0.0898679	0.0864176	0.109748	0.0640588	0.0716339	0.0962616	0.073753	0.0766675	0.0941183	0.277827	0.274021	0.281742	0.290226	0.257355	0.289146	0.264485	0.273502	0.307529	0.301236	0.24712	0.283892	0.248223	0.245003	0.259171	0.235667	0.2219	0.250884	0.242216	0.226128	0.247121	0.247023	0.242078	0.249122
47	0.140525	0.122349	0.193725	0.134119	0.114278	0.188159	0.116548	0.109129	0.150787	0.111083	0.107973	0.145511	0.0863687	0.0885494	0.114228	0.0877011	0.08896	0.110317	0.0781595	0.0718483	0.0826821	0.0801072	0.0756255	0.0973306	0.280437	0.260235	0.288469	0.264768	0.25638	0.280083	0.267641	0.255415	0.262279	0.266342	0.25016	0.262956	0.239821	0.23352	0.251739	0.244576	0.225119	0.244812	0.230486	0.248001	0.237064	0.237622	0.240246	0.238616
48	0.133662	0.112422	0.179539	0.129881	0.11491	0.17843	0.10375	0.0924372	0.146931	0.11633	0.0978054	0.146493	0.0898542	0.0927137	0.110993	0.0909006	0.0844419	0.112604	0.0797173	0.0781781	0.105008	0.0777464	0.0728842	0.0987597	0.287879	0.278487	0.288033	0.283244	0.261091	0.285516	0.254311	0.262955	0.247864	0.26533	0.242568	0.263957	0.244448	0.229262	0.24807	0.237462	0.226477	0.250467	0.232642	0.228387	0.236197	0.211889	0.219091	0.238435
49	0.137898	0.117859	0.187608	0.131816	0.115077	0.180252	0.100637	0.102056	0.147658	0.108631	0.0919098	0.139452	0.0894342	0.0875603	0.109122	0.0894628	0.0904624	0.117751	0.064648	0.0630378	0.0865894	0.0695511	0.0706019	0.0871696	0.266666	0.26633	0.275258	0.26579	0.253039	0.263345	0.274035	0.254682	0.265563	0.265303	0.242738	0.266928	0.234118	0.218478	0.242929	0.24184	0.225662	0.241671	0.228553	0.225296	0.243395	0.231588	0.225646	0.236195
50	0.130196	0.116936	0.180517	0.130919	0.106675	0.177251	0.1171	0.0954803	0.136808	0.122328	0.0909733	0.135481	0.0865884	0.0801609	0.108383	0.0853457	0.0805777	0.111498	0.0807245	0.0719073	0.0931197	0.0742501	0.0788435	0.0955567	0.274289	0.267154	0.290947	0.283314	0.259804	0.285701	0.259408	0.259565	0.269974	0.271754	0.245693	0.264496	0.230275	0.236869	0.248342	0.238139	0.222871	0.256396	0.231559	0.222301	0.23085	0.217159	0.213063	0.2157
51	0.133337	0.118497	0.180035	0.134558	0.109222	0.18343	0.100535	0.0930601	0.150256	0.105972	0.0898636	0.139713	0.0888474	0.0820142	0.108791	0.0842152	0.0853809	0.109287	0.0731452	0.0700549	0.0861548	0.0683285	0.0664228	0.0844716	0.280227	0.266992	0.279317	0.26735	0.256375	0.273795	0.274254	0.250449	0.256637	0.261088	0.240451	0.254533	0.228615	0.230116	0.247341	0.227625	0.222446	0.235562	0.225726	0.227131	0.217433	0.22105	0.225899	0.209739
52	0.130875	0.121227	0.183937	0.131328	0.102092	0.172116	0.11123	0.102435	0.146366	0.105011	0.0819071	0.155556	0.0834252	0.0830601	0.108996	0.0854067	0.0871699	0.109695	0.0674805	0.074837	0.0922879	0.07465	0.0653386	0.0891389	0.287936	0.270958	0.300913	0.27763	0.258538	0.286507	0.270502	0.256518	0.261542	0.269804	0.257676	0.276921	0.234468	0.238895	0.254662	0.227775	0.229527	0.2491	0.221149	0.227239	0.223267	0.218833	0.219168	0.232441
53	0.130271	0.111887	0.178472	0.127759	0.100433	0.172631	0.11571	0.0920489	0.146742	0.110995	0.0776685	0.131082	0.0850561	0.0829308	0.0985398	0.0842391	0.0783241	0.105178	0.0672203	0.0595872	0.088515	0.067626	0.0635464	0.083221	0.287928	0.26859	0.281475	0.285051	0.263466	0.279278	0.283506	0.248984	0.248916	0.256362	0.232793	0.254675	0.242987	0.239686	0.245993	0.238389	0.228975	0.247273	0.225761	0.232157	0.212038	0.20737	0.216657	0.208593
54	0.122968	0.111054	0.172816	0.124961	0.0994331	0.162596	0.0923044	0.093097	0.142594	0.102204	0.0875833	0.136504	0.0823064	0.0819159	0.101319	0.0870329	0.0856094	0.0970345	0.0639473	0.0620883	0.0902332	0.0681542	0.0602222	0.0891973	0.283872	0.266079	0.289648	0.270574	0.265247	0.280076	0.267605	0.252075	0.249955	0.251137	0.256627	0.25171	0.235398	0.232118	0.244806	0.236488	0.233673	0.244231	0.206877	0.229058	0.21647	0.207797	0.205011	0.222069
55	0.123242	0.112093	0.173022	0.123912	0.105783	0.169216	0.106851	0.0991806	0.152378	0.0952168	0.0845259	0.148699	0.0810975	0.0775421	0.10168	0.0808529	0.0865334	0.106385	0.0806224	0.0842077	0.0880114	0.0879517	0.0782581	0.0917141	0.285235	0.274648	0.291001	0.267032	0.264781	0.262897	0.265053	0.253415	0.26214	0.256286	0.236735	0.244804	0.234679	0.233107	0.242117	0.233353	0.234055	0.235368	0.226522	0.221415	0.21488	0.211569	0.218731	0.224777
56	0.125874	0.10924	0.173985	0.118953	0.09994	0.166495	0.0993139	0.0905985	0.140638	0.0968786	0.0913998	0.136042	0.0816735	0.0805856	0.0979424	0.085058	0.0770977	0.0972333	0.0706666	0.0597722	0.0767752	0.0669337	0.0643379	0.080485	0.296012	0.278287	0.299066	0.273817	0.268514	0.30046	0.24729	0.237713	0.264082	0.25301	0.249879	0.253778	0.243384	0.255855	0.249875	0.230635	0.234144	0.244076	0.206855	0.199745	0.19115	0.204043	0.204604	0.208248
57	0.120346	0.102494	0.180044	0.122526	0.102342	0.17045	0.0946406	0.0834577	0.136801	0.0947854	0.0760768	0.13286	0.0836363	0.0811476	0.103578	0.0741964	0.0845644	0.104696	0.0629644	0.0582042	0.0835655	0.0660349	0.0642541	0.0835034	0.288416	0.277844	0.300629	0.280204	0.266698	0.28152	0.275966	0.242714	0.255171	0.242395	0.243037	0.25444	0.240583	0.240014	0.261223	0.228173	0.236834	0.24078	0.210337	0.224575	0.225364	0.206916	0.21233	0.2136
58	0.127128	0.108469	0.166201	0.118288	0.0958402	0.160889	0.111424	0.102785	0.142091	0.0949159	0.0825939	0.131368	0.0758471	0.0776013	0.0953444	0.0759978	0.0693771	0.088515	0.0744039	0.0687981	0.0875264	0.0762548	0.0649205	0.0814424	0.284752	0.277538	0.275761	0.277118	0.262263	0.280333	0.272971	0.256671	0.248017	0.25538	0.265817	0.234149	0.231306	0.229209	0.244508	0.222893	0.228603	0.238172	0.215415	0.211188	0.212122	0.204574	0.22049	0.219887
59	0.115421	0.104802	0.173507	0.115599	0.0980146	0.168384	0.104099	0.0968427	0.130965	0.0887622	0.0814892	0.139654	0.0761957	0.0818496	0.0978391	0.076424	0.0763236	0.100292	0.0687003	0.0606889	0.0807006	0.0716796	0.0701172	0.0785172	0.284577	0.261381	0.277878	0.267443	0.245883	0.272634	0.257441	0.268208	0.265718	0.271226	0.249014	0.241937	0.227929	0.224699	0.235594	0.227676	0.231824	0.229914	0.223591	0.235239	0.214778	0.211601	0.214021	0.218587
60	0.116873	0.108662	0.18162	0.121047	0.103318	0.165615	0.0998154	0.0792701	0.131248	0.0952668	0.0859337	0.131918	0.0822364	0.0770165	0.106467	0.0807619	0.0737539	0.0946619	0.064782	0.0650667	0.0814325	0.062828	0.067467	0.0749457	0.279052	0.277433	0.288555	0.277397	0.27393	0.263429	0.260906	0.256783	0.23628	0.239854	0.243102	0.255225	0.24392	0.233339	0.240206	0.227876	0.236418	0.237984	0.203975	0.22261	0.216645	0.20772	0.200858	0.208345
61	0.112254	0.102507	0.166854	0.119263	0.0973345	0.161571	0.106105	0.0887789	0.15611	0.105477	0.0894038	0.136744	0.0759019	0.079859	0.0979448	0.0739297	0.083561	0.102703	0.0699553	0.0619906	0.0884935	0.0612515	0.0642597	0.0838878	0.296822	0.277342	0.288435	0.274827	0.270575	0.278753	0.264154	0.265185	0.246935	0.261919	0.248435	0.232573	0.22291	0.232248	0.241589	0.224518	0.228135	0.231952	0.211612	0.239605	0.214838	0.206457	0.225089	0.218838
62	0.114915	0.0997818	0.170355	0.114709	0.0927913	0.164437	0.106332	0.0860448	0.140465	0.108607	0.0840805	0.143588	0.0714117	0.0701071	0.0870351	0.0765459	0.0769352	0.0955263	0.0650343	0.0770491	0.0832736	0.0650207	0.0666619	0.0885329	0.288886	0.275748	0.289605	0.277093	0.269374	0.29049	0.240718	0.26039	0.244747	0.249568	0.228357	0.244674	0.236238	0.244722	0.249712	0.232096	0.235167	0.246218	0.194962	0.212338	0.206327	0.199911	0.206115	0.195851
63	0.114669	0.107543	0.163482	0.118433	0.0946869	0.16367	0.0942807	0.0836293	0.139164	0.101825	0.08531	0.146431	0.080701	0.0800503	0.0931322	0.0769254	0.0792565	0.0923666	0.0757349	0.0718165	0.0851947	0.0721779	0.0800645	0.0867439	0.280567	0.270428	0.288928	0.281792	0.257171	0.275759	0.239936	0.250977	0.252681	0.243823	0.243297	0.243445	0.233799	0.2455	0.24378	0.228261	0.232537	0.232049	0.197574	0.223717	0.193423	0.196489	0.20014	0.191377
64	0.113215	0.103815	0.169056	0.120615	0.0932076	0.15599	0.0911475	0.0950335	0.146154	0.0906909	0.0807354	0.130102	0.075082	0.0767165	0.0957439	0.0742696	0.0780894	0.0934299	0.0678069	0.076411	0.0804386	0.0656292	0.0709491	0.0816933	0.303125	0.28567	0.289174	0.287745	0.266068	0.288645	0.272092	0.239561	0.236707	0.262074	0.231475	0.239808	0.236977	0.251025	0.244654	0.233342	0.232968	0.241827	0.210595	0.225517	0.206356	0.194096	0.203146	0.199463
65	0.110772	0.103523	0.160073	0.111255	0.0968584	0.158059	0.0823955	0.0793701	0.12576	0.097519	0.0828896	0.127296	0.0707813	0.0688325	0.0961916	0.0745662	0.06934	0.0936513	0.0528357	0.0646818	0.0817841	0.0634284	0.0589094	0.0784278	0.293207	0.28095	0.295864	0.279634	0.259941	0.2719	0.271725	0.278312	0.246982	0.248435	0.246245	0.256082	0.238607	0.246297	0.240513	0.22651	0.236965	0.244168	0.191764	0.224623	0.203757	0.19357	0.224131	0.20149
66	0.111595	0.098989	0.166364	0.104318	0.095657	0.168988	0.106041	0.0846723	0.129676	0.0871572	0.0852761	0.136531	0.0741174	0.0774035	0.0935638	0.0800738	0.0756665	0.0925857	0.068578	0.0712985	0.0759036	0.0710903	0.0568052	0.081148	0.29865	0.29396	0.290561	0.291608	0.267532	0.27995	0.272425	0.24991	0.240263	0.270109	0.247997	0.252231	0.233827	0.258118	0.241651	0.231113	0.239208	0.244132	0.203361	0.217042	0.19915	0.199396	0.220331	0.194582
67	0.112998	0.0988204	0.162771	0.104572	0.0915821	0.158736	0.0961539	0.0883952	0.137127	0.0995429	0.081599	0.124623	0.0738515	0.0785884	0.0920682	0.0744338	0.0787347	0.0914085	0.0648683	0.0680084	0.0767796	0.061601	0.057264	0.0781447	0.295357	0.275924	0.275304	0.271219	0.265625	0.272357	0.264243	0.257124	0.245578	0.272003	0.239675	0.251123	0.226478	0.239496	0.234045	0.217455	0.227455	0.226007	0.22317	0.221091	0.203881	0.202592	0.213759	0.195819
68	0.119105	0.107863	0.17589	0.116902	0.101181	0.169352	0.0922165	0.0829813	0.134143	0.0995151	0.081673	0.129481	0.0782694	0.0833225	0.103587	0.0898951	0.0839083	0.096719	0.0613788	0.0662514	0.0826212	0.0592168	0.0704345	0.0778616	0.286781	0.270775	0.283852	0.279494	0.26254	0.281311	0.24784	0.256033	0.240734	0.228018	0.2297	0.242709	0.228823	0.246409	0.236233	0.223883	0.23413	0.246173	0.195351	0.209232	0.191673	0.200561	0.205426	0.19067
69	0.112185	0.103497	0.173066	0.112141	0.097236	0.154453	0.0983465	0.0896191	0.139127	0.100931	0.0792924	0.145128	0.0757786	0.0726671	0.0943437	0.0707124	0.0745375	0.0887009	0.0707189	0.0632734	0.0794768	0.0619364	0.0675904	0.0798843	0.298353	0.283739	0.310672	0.281606	0.266192	0.290516	0.241519	0.257777	0.254804	0.245439	0.230433	0.222594	0.225004	0.244874	0.239342	0.228604	0.229008	0.243862	0.189141	0.219008	0.190075	0.190169	0.210856	0.182567
70	0.100061	0.0990913	0.169008	0.106943	0.093146	0.156963	0.0992492	0.0938989	0.140641	0.0990698	0.0923806	0.149317	0.0841323	0.0734195	0.0923827	0.0781271	0.0737777	0.0926954	0.0655683	0.057107	0.0770562	0.0735814	0.0666507	0.0871014	0.29538	0.293468	0.286496	0.291816	0.269769	0.288231	0.26937	0.243475	0.235798	0.251621	0.234242	0.23373	0.235805	0.254029	0.243192	0.22623	0.23969	0.237735	0.200159	0.224158	0.198074	0.198539	0.19022	0.192168
71	0.110215	0.0949926	0.152915	0.0969038	0.0923005	0.155954	0.0926357	0.0849499	0.13023	0.08963	0.080132	0.140256	0.0709476	0.0746521	0.0872842	0.0709071	0.0674602	0.0875283	0.0673358	0.0640029	0.0720118	0.0648368	0.0605669	0.0737577	0.292349	0.287972	0.289264	0.289592	0.274252	0.292925	0.249721	0.243227	0.246127	0.231273	0.228186	0.229362	0.226643	0.246053	0.241396	0.229823	0.236571	0.230766	0.197223	0.20875	0.205071	0.196321	0.192356	0.198613
72	0.111446	0.100781	0.167261	0.111734	0.0929554	0.152112	0.103316	0.0823325	0.14831	0.0942053	0.0732933	0.130072	0.0749431	0.0758815	0.0898775	0.0699212	0.0762866	0.0942886	0.0571799	0.0622256	0.0768568	0.0546006	0.0552716	0.0775724	0.297851	0.281922	0.309851	0.291322	0.271775	0.279661	0.244223	0.228651	0.228807	0.23503	0.212235	0.22796	0.235179	0.249168	0.233945	0.231927	0.232332	0.239393	0.194905	0.203172	0.180602	0.190529	0.196338	0.178817
73	0.105551	0.0987285	0.156215	0.109911	0.0888298	0.151241	0.0901705	0.0804333	0.130042	0.0886715	0.0801905	0.12224	0.0749748	0.0736835	0.0901989	0.079339	0.0761008	0.0919714	0.0662164	0.0472803	0.065341	0.0677821	0.0532564	0.0689733	0.297065	0.290704	0.293673	0.301938	0.28074	0.295489	0.268221	0.253825	0.265488	0.270592	0.257827	0.243663	0.231123	0.250201	0.245859	0.229202	0.229642	0.232674	0.206618	0.237575	0.205492	0.201667	0.214201	0.204691
74	0.105435	0.090058	0.160404	0.0984006	0.0950586	0.149722	0.0974448	0.0866011	0.137113	0.0984362	0.0888044	0.126944	0.0739688	0.0755749	0.0980642	0.0771408	0.0756694	0.0901193	0.0618723	0.0643939	0.0764419	0.0646329	0.0686341	0.082689	0.29834	0.285636	0.294965	0.284937	0.281334	0.295882	0.235274	0.240854	0.240781	0.239945	0.220346	0.214676	0.230333	0.232647	0.235454	0.229278	0.240493	0.232634	0.189761	0.201872	0.203748	0.1965	0.204689	0.189299
75	0.112842	0.094034	0.155735	0.104813	0.0940657	0.16112	0.10348	0.0824116	0.127196	0.0891904	0.0718499	0.125175	0.0783753	0.0792519	0.0960505	0.0761425	0.0697547	0.0879191	0.0525388	0.0572721	0.0695149	0.0618266	0.0563421	0.0706469	0.282728	0.287892	0.290526	0.285754	0.265026	0.281258	0.265254	0.279809	0.247861	0.2475	0.239851	0.237975	0.226524	0.243454	0.230885	0.214394	0.221804	0.236424	0.203556	0.222929	0.198048	0.211082	0.207026	0.192223
76	0.101618	0.0998347	0.15656	0.103299	0.0966442	0.158541	0.0889811	0.0882437	0.133981	0.0828389	0.0814944	0.126581	0.077457	0.0788164	0.09456	0.0810283	0.0767941	0.0889781	0.0666102	0.0670323	0.0735385	0.059234	0.0575586	0.0720274	0.286748	0.27983	0.295497	0.277663	0.260627	0.282734	0.244712	0.231826	0.242586	0.250456	0.223981	0.227252	0.233389	0.242736	0.23962	0.221224	0.22863	0.230399	0.181142	0.195198	0.188589	0.18328	0.196992	0.190167
77	0.106322	0.101875	0.164962	0.110976	0.0978258	0.15533	0.0915675	0.0877422	0.131052	0.0874738	0.074658	0.122656	0.0791414	0.0829738	0.0947961	0.0801166	0.0796561	0.0969281	0.0575932	0.058915	0.0699602	0.0646046	0.0668779	0.0705111	0.281726	0.290436	0.294787	0.278448	0.266465	0.285262	0.24428	0.233377	0.224867	0.243449	0.235508	0.223988	0.231691	0.23904	0.235484	0.221218	0.228374	0.229624	0.196977	0.211156	0.193342	0.185615	0.184691	0.186588
78	0.102362	0.0935969	0.158239	0.103603	0.0894964	0.159669	0.0979723	0.0867978	0.143889	0.0975612	0.0803339	0.137116	0.0709292	0.0750915	0.093213	0.0767694	0.0731391	0.0903095	0.0642606	0.0674241	0.0769988	0.0649879	0.0692615	0.0839199	0.27125	0.279619	0.281956	0.267444	0.26149	0.2761	0.254666	0.237813	0.229179	0.253444	0.246523	0.227203	0.214606	0.231013	0.224613	0.223852	0.222045	0.224744	0.203394	0.211043	0.188545	0.191872	0.206686	0.188696
79	0.109876	0.101107	0.157673	0.10468	0.0957055	0.157046	0.0844604	0.0864526	0.127735	0.0815582	0.0703759	0.118132	0.0730576	0.0764072	0.0925229	0.0759232	0.081705	0.0931854	0.0631269	0.0564285	0.0705795	0.056731	0.0643307	0.0677202	0.302527	0.290497	0.298466	0.288334	0.27092	0.29067	0.240833	0.234573	0.229365	0.230536	0.209005	0.216229	0.223072	0.244478	0.239101	0.215844	0.229028	0.232025	0.176628	0.206751	0.1832	0.170737	0.19797	0.18224
80	0.10523	0.092685	0.148497	0.101185	0.0848756	0.145066	0.100071	0.0908624	0.140304	0.0935487	0.0844034	0.123021	0.0781599	0.0764634	0.0847926	0.0723529	0.0728165	0.0858266	0.0713126	0.0598861	0.0702241	0.0618977	0.0541146	0.0798498	0.272152	0.281251	0.285016	0.276414	0.262444	0.278464	0.255637	0.252378	0.245555	0.25149	0.250331	0.2329	0.225423	0.243366	0.221658	0.220525	0.223571	0.220823	0.19573	0.213463	0.180972	0.200216	0.206657	0.2009
81	0.101114	0.0962132	0.155759	0.102368	0.0919481	0.151457	0.102507	0.0839206	0.137407	0.0854803	0.0704983	0.129578	0.0717649	0.0756225	0.0830526	0.0757585	0.0714447	0.0902471	0.0694023	0.0742611	0.068095	0.0703002	0.0665917	0.0778068	0.290134	0.292741	0.288839	0.276208	0.263529	0.282577	0.225751	0.246832	0.211032	0.245769	0.237074	0.226553	0.222899	0.244875	0.228085	0.218858	0.221358	0.226238	0.191	0.210389	0.183159	0.188611	0.20173	0.17602
82	0.0986963	0.0850023	0.146894	0.0954147	0.081447	0.148926	0.0831618	0.085018	0.130462	0.0923638	0.0903377	0.141682	0.0727757	0.0744362	0.0855623	0.0698385	0.0634012	0.0859116	0.0597578	0.0643742	0.0794993	0.0665288	0.0566441	0.0682803	0.291395	0.28823	0.2975	0.282715	0.259649	0.271299	0.261023	0.265223	0.239509	0.251458	0.240255	0.250131	0.213933	0.241575	0.215266	0.213289	0.226784	0.224336	0.190565	0.219157	0.195631	0.186819	0.204791	0.187458
83	0.0996455	0.0856225	0.152266	0.102662	0.0847507	0.148321	0.0865434	0.0778041	0.139429	0.0885312	0.0694731	0.120018	0.069404	0.0700318	0.0876273	0.0720026	0.0662906	0.0815138	0.0611395	0.0658231	0.0677832	0.0623273	0.0601696	0.0659559	0.298002	0.291851	0.297225	0.27437	0.262541	0.277844	0.247527	0.232521	0.235542	0.232751	0.241771	0.230051	0.212134	0.236371	0.219206	0.229752	0.221987	0.23495	0.200111	0.223924	0.17647	0.18396	0.226232	0.175466
84	0.101822	0.0945127	0.147737	0.0950121	0.0843671	0.14235	0.0900403	0.0790607	0.125747	0.095955	0.0735418	0.120851	0.0677342	0.064665	0.0925341	0.0692322	0.0716291	0.0801913	0.0599988	0.0673837	0.0748747	0.0642505	0.0632532	0.0741225	0.285542	0.29224	0.302886	0.282212	0.26994	0.289444	0.239126	0.250543	0.238898	0.233374	0.211649	0.230297	0.226369	0.243811	0.228246	0.225163	0.238158	0.227858	0.196291	0.202698	0.178033	0.186367	0.188881	0.179804
85	0.105141	0.0892092	0.148849	0.0981563	0.0920586	0.15049	0.0947485	0.0897059	0.134267	0.0892887	0.0733533	0.134887	0.0710142	0.0773814	0.085939	0.064941	0.0721104	0.0893432	0.0628658	0.0702252	0.0769246	0.0642029	0.0665216	0.0710143	0.287171	0.278415	0.303171	0.277323	0.260886	0.291029	0.245567	0.238165	0.244595	0.230169	0.242867	0.240456	0.215081	0.236298	0.22714	0.211869	0.222324	0.214002	0.202453	0.227183	0.181767	0.186288	0.205016	0.181142
86	0.0936834	0.092995	0.149277	0.100942	0.0825412	0.151259	0.0884495	0.0765354	0.133649	0.0847317	0.0687011	0.122492	0.0659774	0.069896	0.0886018	0.0691016	0.0706864	0.0847571	0.0596209	0.0547108	0.0695978	0.0491267	0.0546415	0.0729621	0.287606	0.288114	0.292426	0.270144	0.269759	0.277544	0.264717	0.249154	0.223576	0.255067	0.227188	0.229766	0.223112	0.2425	0.221811	0.223304	0.229626	0.224574	0.190454	0.203196	0.191094	0.186543	0.209507	0.186183
87	0.0963666	0.0870106	0.147396	0.100872	0.0832862	0.141718	0.0762698	0.0742	0.1227	0.0743678	0.0630298	0.113886	0.0650219	0.0709074	0.0857328	0.0733092	0.0698618	0.0835936	0.0573461	0.056676	0.0744609	0.0584515	0.0620681	0.0720711	0.284739	0.277556	0.293147	0.272516	0.257126	0.289202	0.25689	0.260352	0.239286	0.224472	0.22424	0.227129	0.217069	0.249708	0.219024	0.206957	0.227908	0.218023	0.181199	0.211537	0.18001	0.185728	0.192559	0.190091
88	0.0976234	0.0929259	0.152171	0.101553	0.0880637	0.150777	0.0842082	0.0829489	0.119292	0.0807984	0.0679083	0.125961	0.0640106	0.0695875	0.083003	0.0713633	0.0655472	0.0783595	0.0616553	0.0585896	0.066177	0.0635117	0.0561402	0.0710475	0.291107	0.282258	0.292776	0.27381	0.27453	0.296059	0.269868	0.252145	0.231922	0.24046	0.228265	0.220096	0.216208	0.238293	0.242382	0.224237	0.22721	0.229968	0.176285	0.206613	0.184252	0.195372	0.192523	0.183241
89	0.102792	0.0928652	0.150018	0.0989121	0.0855007	0.147427	0.0901336	0.0771053	0.123438	0.0827083	0.0614173	0.112474	0.0693235	0.0760391	0.0845067	0.0773419	0.0726254	0.0865318	0.0438611	0.0536943	0.0612815	0.0579192	0.0530025	0.0702902	0.291338	0.283542	0.292351	0.276486	0.261979	0.277023	0.239294	0.23222	0.252354	0.249723	0.224484	0.214416	0.213435	0.232682	0.223393	0.21179	0.221109	0.230246	0.162995	0.202794	0.170683	0.17318	0.169914	0.159125
90	0.0982986	0.0887233	0.13791	0.0978516	0.0869078	0.137188	0.0851324	0.0713553	0.132559	0.0765359	0.0739454	0.121063	0.0664687	0.0719649	0.0831985	0.0669835	0.0683237	0.0806409	0.059256	0.049143	0.0715628	0.0671165	0.0588232	0.073677	0.2812	0.298011	0.296999	0.280995	0.270834	0.283249	0.237524	0.240061	0.222777	0.2177	0.21949	0.220582	0.221467	0.24507	0.231215	0.220735	0.236475	0.233134	0.182038	0.193415	0.161307	0.176204	0.175753	0.177748
91	0.100773	0.0913799	0.144024	0.100418	0.0854636	0.142731	0.0820041	0.0759693	0.131464	0.0762873	0.0732419	0.120416	0.0679317	0.068288	0.0871098	0.0660988	0.0711501	0.0860352	0.0524839	0.0645284	0.0647847	0.0571318	0.0522501	0.0639547	0.282539	0.273277	0.274846	0.281398	0.253839	0.273053	0.240686	0.233472	0.220576	0.221685	0.205352	0.208699	0.209958	0.225647	0.213076	0.21638	0.21896	0.213482	0.182537	0.206271	0.180611	0.177088	0.190708	0.160324
92	0.0957843	0.0936541	0.146484	0.0931096	0.0881623	0.143887	0.0893615	0.0821725	0.127208	0.0819168	0.069204	0.123701	0.0703995	0.0689172	0.0861541	0.0704731	0.0724076	0.0846862	0.0668505	0.0609795	0.0768762	0.0645915	0.0588287	0.074468	0.289452	0.282984	0.289202	0.271363	0.25761	0.272102	0.255236	0.244019	0.229236	0.242242	0.228306	0.218208	0.207054	0.234027	0.230235	0.206901	0.220802	0.21965	0.181055	0.214334	0.182732	0.18125	0.176569	0.170006
93	0.103807	0.0917651	0.142401	0.0984938	0.0896852	0.138549	0.0851358	0.0740406	0.126965	0.0770297	0.0736455	0.114335	0.0659126	0.0724031	0.0847904	0.0723683	0.0719355	0.0892177	0.0505009	0.0571485	0.0582409	0.0494269	0.0481598	0.0640961	0.290434	0.286485	0.298916	0.281685	0.26449	0.29136	0.261815	0.252636	0.247395	0.253745	0.243836	0.221594	0.219742	0.242382	0.22755	0.220314	0.233624	0.222629	0.195151	0.210172	0.175301	0.194471	0.196499	0.177904
94	0.100158	0.0948063	0.148589	0.0999428	0.0948151	0.141837	0.0827889	0.0665213	0.117638	0.0780235	0.0655494	0.105271	0.0752966	0.075339	0.0863927	0.0740198	0.0763487	0.0921414	0.0502107	0.0566859	0.0641357	0.0484258	0.050423	0.0584398	0.283017	0.269881	0.287155	0.284834	0.268469	0.283186	0.241924	0.249698	0.251408	0.239146	0.22597	0.222425	0.203815	0.231698	0.223504	0.208601	0.212619	0.210817	0.192047	0.191435	0.178144	0.182816	0.192451	0.176329
95	0.091439	0.0875054	0.132733	0.0946313	0.0793825	0.137358	0.0781362	0.0719304	0.131766	0.0847091	0.0659884	0.11177	0.0671143	0.0739529	0.0877976	0.0639931	0.0637623	0.0859608	0.0485377	0.0539613	0.0665264	0.0549771	0.0520674	0.0624292	0.273602	0.280959	0.285195	0.264357	0.248006	0.274323	0.220455	0.218635	0.220601	0.222344	0.220618	0.206031	0.210179	0.232084	0.221804	0.200738	0.220642	0.208182	0.16799	0.183712	0.167231	0.177132	0.18979	0.168134
96	0.0999699	0.0890035	0.141454	0.0973903	0.0858368	0.140192	0.0836859	0.0749705	0.123326	0.0766674	0.0664525	0.102969	0.0709982	0.0745838	0.088515	0.075483	0.0756227	0.0871209	0.0504449	0.0573219	0.0642814	0.0559684	0.051171	0.0607738	0.266085	0.272088	0.279754	0.26349	0.246511	0.278276	0.233695	0.235097	0.227329	0.228334	0.220119	0.217912	0.208892	0.228692	0.222122	0.207665	0.216211	0.215378	0.174685	0.199076	0.180149	0.177154	0.186573	0.16946
97	0.0984546	0.0910505	0.147914	0.0981129	0.0868423	0.145009	0.0775098	0.07408	0.11596	0.0731694	0.0650078	0.107983	0.0719981	0.0737529	0.0883076	0.0687672	0.0729935	0.0766281	0.0547107	0.0495478	0.0574293	0.054262	0.0553466	0.0640371	0.268772	0.277101	0.291229	0.269784	0.25159	0.281512	0.210833	0.222683	0.225374	0.233435	0.205398	0.19641	0.204826	0.223236	0.215679	0.206202	0.221736	0.203614	0.178613	0.187598	0.172645	0.171609	0.187049	0.152355
98	0.0987144	0.0906015	0.136424	0.0888047	0.0818057	0.139301	0.0816445	0.0801974	0.117302	0.0802072	0.0759028	0.116579	0.0664641	0.0725759	0.0855432	0.0717357	0.0692952	0.0816213	0.0593759	0.0573528	0.0627468	0.0600075	0.0544185	0.0656776	0.27328	0.274734	0.284394	0.247466	0.251711	0.267655	0.235104	0.219581	0.216944	0.219517	0.201544	0.223646	0.198672	0.222305	0.212437	0.204918	0.205877	0.201077	0.182511	0.198265	0.165814	0.179227	0.172582	0.162336
99	0.0974001	0.0869846	0.143272	0.0932456	0.0813068	0.142775	0.0887485	0.0852927	0.119875	0.0857375	0.0811378	0.132457	0.0714713	0.0705411	0.0793486	0.0693635	0.0726468	0.0829637	0.0517601	0.0589669	0.061525	0.0627084	0.0549388	0.0631042	0.274093	0.27419	0.28999	0.27091	0.25569	0.269342	0.239968	0.219023	0.228297	0.222538	0.213987	0.224213	0.220713	0.236096	0.223726	0.206031	0.227645	0.218591	0.168542	0.191354	0.170465	0.164855	0.186693	0.153451
100	0.10088	0.0921024	0.148474	0.0906936	0.0838852	0.13843	0.0725837	0.0708014	0.122947	0.0804868	0.0601002	0.114227	0.0714772	0.0733904	0.0815038	0.0745703	0.0705023	0.0833754	0.0476603	0.045854	0.0634628	0.0536732	0.0604885	0.054217	0.274071	0.266933	0.28878	0.259485	0.243479	0.282694	0.209167	0.215979	0.224784	0.212587	0.20343	0.221498	0.206706	0.229391	0.204024	0.200535	0.207334	0.205627	0.167314	0.187078	0.161441	0.161694	0.188426	0.151408
101	0.0967783	0.0863556	0.138524	0.0881564	0.0826861	0.131192	0.0837231	0.0839809	0.128267	0.093438	0.0653823	0.114944	0.0655888	0.0704157	0.0781703	0.0729379	0.0701326	0.0794833	0.0534431	0.0608872	0.0609318	0.0621609	0.0590515	0.0595883	0.287069	0.269525	0.282953	0.269107	0.249938	0.278275	0.220997	0.220142	0.226978	0.219579	0.212329	0.202898	0.209206	0.234243	0.212143	0.206463	0.219338	0.215604	0.167604	0.188295	0.168347	0.162454	0.181531	0.164352
102	0.0917829	0.087683	0.142107	0.0887368	0.0801298	0.134735	0.072802	0.0754314	0.114254	0.0786185	0.0687621	0.114478	0.0661173	0.0724202	0.0782247	0.0699413	0.072361	0.0744555	0.0509162	0.0448203	0.0605009	0.0495038	0.0523612	0.060827	0.266614	0.265632	0.275815	0.260402	0.250248	0.272744	0.215485	0.209873	0.210716	0.21137	0.194503	0.205589	0.203071	0.22532	0.208075	0.195869	0.201087	0.211476	0.162219	0.174574	0.164094	0.156635	0.176923	0.151535
103	0.0895798	0.083447	0.132542	0.0868099	0.0748248	0.133272	0.0762751	0.0729185	0.116278	0.0753933	0.0688695	0.103559	0.0658344	0.0687267	0.0773378	0.0712028	0.0646843	0.0720405	0.0499419	0.0515553	0.0609639	0.0492406	0.053275	0.0562946	0.270278	0.273673	0.287024	0.249418	0.24991	0.271314	0.212697	0.212143	0.205027	0.22307	0.192907	0.203185	0.203177	0.227149	0.20994	0.20386	0.212504	0.212671	0.155246	0.183064	0.158035	0.169059	0.163867	0.152751
104	0.0942605	0.0900607	0.136019	0.0922742	0.0769891	0.128953	0.0793572	0.0807209	0.108853	0.0754708	0.0700803	0.110487	0.0671701	0.0681604	0.0798863	0.066998	0.0676731	0.0805731	0.0616867	0.0604883	0.0692916	0.0586665	0.0534975	0.0656588	0.290039	0.257482	0.285596	0.253115	0.256884	0.273122	0.217922	0.204256	0.199673	0.204797	0.198589	0.212217	0.199942	0.225072	0.213378	0.189074	0.210989	0.214334	0.152751	0.180311	0.150797	0.156073	0.17152	0.154444
105	0.0948435	0.0847262	0.13279	0.0891655	0.0793531	0.126993	0.0738644	0.0782437	0.116126	0.0645868	0.0672635	0.108122	0.0680605	0.0673104	0.0808936	0.0665792	0.0660626	0.0786194	0.0486861	0.0561358	0.0571772	0.0520334	0.0476393	0.0597743	0.260211	0.253686	0.279159	0.254852	0.233246	0.264643	0.232194	0.227211	0.217989	0.219177	0.212176	0.21486	0.198978	0.225128	0.195858	0.195923	0.19487	0.200822	0.163296	0.186418	0.151283	0.167794	0.174688	0.163336
106	0.0902419	0.0794387	0.128762	0.0871899	0.0772172	0.1302	0.0759353	0.0776129	0.133087	0.0815498	0.0675605	0.107536	0.0687533	0.0714112	0.0841755	0.0660999	0.0678054	0.0795488	0.0535262	0.0574502	0.0537315	0.0569018	0.054524	0.0585	0.2638	0.253029	0.277817	0.249152	0.250217	0.280552	0.220675	0.223009	0.215899	0.208266	0.196392	0.213717	0.202429	0.219584	0.205397	0.196528	0.210338	0.202771	0.169704	0.176147	0.153628	0.16197	0.176235	0.169584
107	0.0877792	0.0837428	0.136192	0.0865191	0.0761042	0.126047	0.0751377	0.0786426	0.119468	0.077803	0.0689926	0.116189	0.069077	0.0708815	0.0816073	0.0700404	0.0630658	0.0813712	0.0574221	0.0605886	0.0641956	0.0644738	0.0579648	0.0690693	0.260846	0.258098	0.266306	0.246973	0.232165	0.249808	0.215203	0.218742	0.229192	0.190298	0.20989	0.218437	0.188345	0.207912	0.203524	0.183933	0.191519	0.205166	0.160665	0.187805	0.162487	0.155473	0.161142	0.166442
108	0.0895821	0.0794927	0.136756	0.0866958	0.0737126	0.129721	0.0666538	0.0682966	0.119722	0.0712467	0.0696767	0.109363	0.0619388	0.06559	0.0774088	0.0655791	0.0665903	0.0731602	0.0530467	0.0489491	0.0649387	0.0648095	0.0495868	0.0635628	0.263146	0.251071	0.279437	0.240761	0.231273	0.261341	0.214231	0.20405	0.209772	0.209873	0.172293	0.196251	0.195569	0.207839	0.201789	0.191662	0.200774	0.197601	0.153931	0.17019	0.148275	0.151535	0.149855	0.150969
109	0.0899247	0.0779663	0.129708	0.0873937	0.0756184	0.124875	0.0811149	0.0690171	0.118754	0.0695575	0.0687139	0.108818	0.0649912	0.0657541	0.0816003	0.0636195	0.0640988	0.074997	0.0511413	0.053014	0.0539756	0.0574269	0.056465	0.0600194	0.257369	0.249948	0.271984	0.251291	0.226272	0.260744	0.188941	0.202871	0.213618	0.187966	0.189708	0.19747	0.193882	0.212148	0.203201	0.189434	0.198758	0.203299	0.149806	0.159213	0.155547	0.144831	0.176573	0.147376
110	0.0890235	0.0788585	0.132391	0.0855709	0.0713768	0.128222	0.0687312	0.0750448	0.11135	0.071533	0.0661675	0.103337	0.0646373	0.0597972	0.0806382	0.0669436	0.0625655	0.0759267	0.0494564	0.05072	0.0759336	0.058878	0.0552849	0.0646309	0.240872	0.230562	0.267185	0.23929	0.232174	0.250334	0.208772	0.199738	0.209583	0.200661	0.19887	0.199272	0.187334	0.20406	0.189362	0.177219	0.203738	0.192599	0.149609	0.165655	0.155318	0.146027	0.165211	0.157349
111	0.0914761	0.0856256	0.139206	0.0933935	0.0780208	0.133169	0.0885045	0.0730147	0.121185	0.0788206	0.0615649	0.113191	0.0741463	0.0695985	0.08425	0.0680205	0.0676968	0.080715	0.0517771	0.0551678	0.0603921	0.0564856	0.055772	0.0655557	0.246517	0.230914	0.247691	0.227744	0.210212	0.243582	0.20536	0.192622	0.206961	0.184977	0.182584	0.196358	0.177318	0.197052	0.18371	0.176557	0.181822	0.186042	0.153821	0.170567	0.142082	0.139047	0.149326	0.16048
112	0.0889744	0.0824881	0.137455	0.0867432	0.0834519	0.12515	0.0883182	0.0756617	0.119926	0.0803088	0.0680846	0.115995	0.0633954	0.0707967	0.0828356	0.0598325	0.0652119	0.0790974	0.0574565	0.0630826	0.0663808	0.0550997	0.0539688	0.071458	0.25651	0.233758	0.282539	0.245592	0.225611	0.25945	0.211384	0.209355	0.209494	0.198156	0.187308	0.202882	0.186731	0.209782	0.191843	0.184457	0.197702	0.196092	0.152041	0.180463	0.161589	0.160111	0.169025	0.157085
113	0.0925756	0.0808782	0.129557	0.0882892	0.0791898	0.127114	0.0830066	0.0734609	0.116695	0.0705813	0.0648688	0.109329	0.0630053	0.0684298	0.0800401	0.0675944	0.0631809	0.0781467	0.0504253	0.0575356	0.0602061	0.0586516	0.0470264	0.0582154	0.226874	0.2276	0.255855	0.217925	0.212078	0.249149	0.20624	0.196595	0.195673	0.188854	0.171962	0.202011	0.160163	0.19396	0.188537	0.172392	0.172932	0.181876	0.14107	0.163783	0.146687	0.14913	0.139801	0.137223
114	0.0916042	0.0862264	0.138163	0.0982104	0.0810143	0.13101	0.0781036	0.0762098	0.108601	0.0765868	0.0626013	0.117672	0.0738759	0.0677654	0.086081	0.0704537	0.0697048	0.0809663	0.0555363	0.0524733	0.0630155	0.0492178	0.040633	0.0618862	0.250712	0.241991	0.271262	0.245834	0.229905	0.25302	0.19261	0.185838	0.209415	0.192244	0.169429	0.196897	0.188268	0.205294	0.195556	0.186012	0.187905	0.193237	0.141235	0.15987	0.145246	0.14558	0.141407	0.139281
115	0.0856284	0.0783294	0.125029	0.0853822	0.0730573	0.127945	0.0837873	0.0780163	0.135115	0.0795778	0.0757833	0.125953	0.0661376	0.0635102	0.0786462	0.0644135	0.0657978	0.0734825	0.0605949	0.0535334	0.0699932	0.0563964	0.0595307	0.0684871	0.22948	0.227088	0.251405	0.219434	0.214995	0.250588	0.208157	0.193522	0.209437	0.187806	0.174215	0.194643	0.173678	0.18474	0.183197	0.169426	0.178098	0.191572	0.148596	0.162105	0.149413	0.140065	0.146756	0.144767
116	0.0882775	0.0844402	0.131304	0.0876707	0.0781264	0.130392	0.0741018	0.0751793	0.109495	0.0825908	0.0644688	0.115681	0.0662606	0.0727537	0.0797716	0.0655011	0.0678239	0.0742724	0.0526977	0.0610368	0.0703749	0.0509361	0.0437775	0.0655496	0.230758	0.230919	0.247543	0.212978	0.204473	0.244497	0.192397	0.185317	0.2203	0.187729	0.183506	0.187483	0.172106	0.193749	0.184649	0.173673	0.179578	0.183922	0.142316	0.152307	0.132828	0.132238	0.13556	0.142933
117	0.0906918	0.0831211	0.132199	0.099183	0.0773993	0.129494	0.0791608	0.0743537	0.122959	0.0871975	0.0668362	0.118411	0.0674868	0.0681872	0.0821854	0.0693734	0.0606799	0.0813598	0.0571426	0.068883	0.0636161	0.055489	0.0637458	0.0580389	0.217237	0.222637	0.25226	0.224684	0.204275	0.242118	0.193471	0.192451	0.190138	0.179876	0.172347	0.195429	0.170622	0.181321	0.16969	0.163291	0.16953	0.179889	0.143832	0.14454	0.145092	0.162942	0.136915	0.136695
118	0.0878743	0.0844275	0.12623	0.0956819	0.0788889	0.126538	0.0764163	0.0790363	0.11597	0.0732138	0.0645987	0.101885	0.0654389	0.0614077	0.0758985	0.0693689	0.0700117	0.0785773	0.053317	0.0530224	0.0634562	0.0489207	0.0546472	0.066005	0.223506	0.223402	0.246381	0.235102	0.212573	0.246843	0.20479	0.170329	0.199973	0.197768	0.170703	0.192934	0.170791	0.18436	0.176613	0.167058	0.182538	0.177347	0.130989	0.168497	0.140205	0.13712	0.135419	0.138104
119	0.0909538	0.0825842	0.128712	0.0898396	0.0765647	0.123159	0.0845566	0.0855226	0.115128	0.0786366	0.0709682	0.111988	0.0730646	0.0740385	0.0774202	0.0663266	0.0614985	0.0771957	0.0513668	0.0529893	0.0708336	0.0606549	0.0591352	0.0624015	0.234059	0.221759	0.245526	0.219829	0.208123	0.244691	0.183514	0.193989	0.211537	0.197751	0.184147	0.183748	0.1668	0.181788	0.183076	0.168688	0.173257	0.175149	0.140583	0.158682	0.133612	0.13394	0.138783	0.147606
120	0.0892753	0.0911492	0.130834	0.0892539	0.0808248	0.127386	0.0768357	0.0654439	0.112409	0.0762724	0.0679031	0.109734	0.0699004	0.0672381	0.0821574	0.0660946	0.0647954	0.0792338	0.0534706	0.0582721	0.0649836	0.0495811	0.0451298	0.0643843	0.227003	0.230171	0.247738	0.225395	0.210886	0.243054	0.212647	0.197098	0.211189	0.195389	0.175845	0.201058	0.182698	0.185883	0.177065	0.163302	0.183032	0.176233	0.147718	0.159624	0.152597	0.136182	0.151423	0.140232
121	0.0886559	0.0853293	0.126751	0.0847397	0.0761666	0.125535	0.0730357	0.0752533	0.11386	0.0821917	0.0653485	0.103439	0.0648804	0.0780744	0.0787216	0.0605548	0.0744453	0.0796046	0.0587293	0.0531864	0.0652507	0.0550086	0.0538772	0.0690958	0.215512	0.217582	0.249627	0.21034	0.200658	0.236583	0.185927	0.186814	0.192931	0.173438	0.165007	0.187119	0.169715	0.177515	0.182376	0.162732	0.175956	0.173047	0.131187	0.153912	0.134245	0.141694	0.138147	0.128832
122	0.0993552	0.085557	0.129057	0.0870855	0.0777076	0.129466	0.0711136	0.0806515	0.123654	0.0872703	0.0731622	0.118473	0.0698836	0.0734054	0.0824139	0.0692589	0.0671586	0.0778289	0.0547115	0.0619172	0.0712639	0.0609792	0.0470803	0.0587323	0.222986	0.208016	0.239451	0.207288	0.190098	0.230331	0.191475	0.18431	0.21606	0.188248	0.171102	0.208205	0.161331	0.173025	0.170445	0.166047	0.167801	0.172598	0.147123	0.149923	0.143088	0.14144	0.142213	0.144312
123	0.0833635	0.0848715	0.125423	0.0854786	0.0733825	0.125007	0.0721264	0.067275	0.109618	0.0826598	0.0661004	0.0993126	0.0647208	0.0773955	0.0765064	0.0652703	0.0679473	0.0754735	0.0468536	0.0511015	0.060728	0.0499011	0.0443068	0.0653969	0.216192	0.200809	0.241315	0.216067	0.197726	0.22627	0.214227	0.179318	0.205196	0.187761	0.182339	0.188329	0.159035	0.173852	0.168447	0.162208	0.170309	0.168676	0.133152	0.153892	0.138913	0.134833	0.162671	0.131282
124	0.0919314	0.0834548	0.126399	0.0905102	0.0766236	0.117601	0.0817738	0.076429	0.109423	0.074929	0.0721035	0.108072	0.0654092	0.0713599	0.0808817	0.0645312	0.0616679	0.0789583	0.0595202	0.050711	0.0763128	0.0593109	0.0569033	0.0670745	0.199538	0.209153	0.234666	0.192048	0.182054	0.218175	0.193478	0.17873	0.188703	0.186157	0.162134	0.19167	0.151848	0.174594	0.161204	0.150475	0.15876	0.159758	0.127719	0.148059	0.130133	0.127874	0.139708	0.136086
125	0.093083	0.0826627	0.131114	0.0874089	0.0806822	0.118883	0.0842539	0.0799474	0.108494	0.0642699	0.069221	0.109949	0.0704296	0.0709684	0.0808212	0.0667762	0.0658334	0.0765011	0.0485278	0.0556594	0.0626349	0.0550631	0.0625263	0.0527021	0.213343	0.20691	0.242103	0.211003	0.197402	0.229586	0.171519	0.167529	0.18704	0.16109	0.160972	0.182256	0.165326	0.169868	0.173742	0.157155	0.159627	0.17434	0.131443	0.159654	0.136331	0.136553	0.122359	0.121118
126	0.0823143	0.0865132	0.12645	0.0898014	0.0751763	0.122498	0.0765135	0.0636692	0.102032	0.0706562	0.0646438	0.100342	0.0707844	0.072866	0.0809277	0.0694346	0.0704849	0.0807267	0.0503477	0.0596863	0.0590263	0.0522423	0.047622	0.0585813	0.207922	0.210954	0.237035	0.201927	0.191627	0.229707	0.172647	0.196799	0.202922	0.176217	0.14994	0.181587	0.160133	0.175377	0.177071	0.165048	0.164041	0.178488	0.126381	0.152099	0.142414	0.129847	0.141094	0.137131
127	0.0880953	0.0775115	0.12795	0.0902405	0.0687308	0.120291	0.0761296	0.0724284	0.104984	0.0728996	0.0716135	0.107579	0.0728692	0.0676434	0.0734687	0.0645979	0.0747347	0.0755407	0.0513902	0.0461617	0.058023	0.0536806	0.0533638	0.0585192	0.207271	0.201381	0.230871	0.194836	0.17607	0.214147	0.199046	0.179727	0.19801	0.172659	0.153766	0.171908	0.148501	0.162883	0.166157	0.15256	0.148606	0.164874	0.140523	0.141725	0.131947	0.132514	0.142476	0.122427
128	0.0948413	0.0874907	0.126228	0.0936852	0.0791416	0.122211	0.0753595	0.0684502	0.113275	0.0743625	0.0676631	0.116247	0.0732845	0.0705601	0.0751402	0.0708492	0.0740969	0.0802471	0.059165	0.0597198	0.0640549	0.0573527	0.0510385	0.0531122	0.200758	0.203364	0.233347	0.200459	0.187765	0.230803	0.178743	0.165287	0.17806	0.166292	0.154096	0.173059	0.149654	0.17431	0.171313	0.163266	0.169474	0.171933	0.125881	0.14862	0.123328	0.119155	0.138033	0.129471
129	0.0884966	0.0908891	0.132308	0.092311	0.0813647	0.125543	0.077971	0.0613123	0.0983012	0.0682168	0.0618536	0.0875798	0.0735648	0.0659414	0.0854743	0.0749211	0.0709115	0.0783873	0.0513642	0.0525707	0.0554792	0.0488061	0.0432778	0.0578651	0.199932	0.194527	0.220424	0.192073	0.181046	0.223399	0.175275	0.168939	0.186202	0.160309	0.153708	0.175444	0.15478	0.170912	0.169368	0.15258	0.158581	0.162973	0.124276	0.134886	0.121674	0.131727	0.129884	0.124398
130	0.0958119	0.0865555	0.132276	0.0897227	0.0843257	0.1276	0.0734973	0.067408	0.0976545	0.0706505	0.0631631	0.103432	0.0734012	0.0761194	0.0819713	0.0693679	0.0796196	0.0854928	0.0490263	0.0579867	0.0536361	0.0456963	0.0455633	0.0565674	0.198794	0.193867	0.224591	0.191899	0.176352	0.222845	0.169768	0.168981	0.181028	0.179579	0.163161	0.191012	0.140822	0.163708	0.151175	0.14956	0.159083	0.157357	0.132097	0.145017	0.129439	0.126861	0.142711	0.124902
131	0.0888221	0.0807505	0.121988	0.0848157	0.0715592	0.117585	0.0738898	0.0699954	0.0973531	0.0621184	0.0565373	0.0901639	0.0676602	0.0633548	0.083236	0.068703	0.0665067	0.0766594	0.049005	0.0497857	0.0566848	0.043899	0.047341	0.0546179	0.188023	0.200305	0.216089	0.19023	0.169449	0.205891	0.176274	0.160967	0.182394	0.17314	0.159471	0.173743	0.146603	0.164342	0.153188	0.14408	0.15856	0.151941	0.128719	0.146241	0.121478	0.133901	0.126572	0.122827
132	0.095986	0.0843646	0.126152	0.0883636	0.079505	0.120662	0.0734753	0.0734858	0.106472	0.0756656	0.0634302	0.0974171	0.0692309	0.0746038	0.080747	0.0666713	0.0755457	0.0803583	0.0447307	0.0525507	0.0700798	0.0595536	0.0570599	0.0667504	0.192694	0.190916	0.213691	0.188075	0.174213	0.212103	0.169189	0.172888	0.1979	0.165609	0.163432	0.189538	0.146825	0.157645	0.149823	0.135469	0.154968	0.157887	0.138703	0.13861	0.130521	0.124923	0.128357	0.133375
133	0.0972216	0.091015	0.1283	0.0934295	0.0876819	0.123929	0.0781651	0.0772959	0.105232	0.0642735	0.0643796	0.104406	0.0671262	0.073515	0.0831779	0.0767758	0.0733576	0.0845847	0.0547096	0.0568759	0.0610924	0.0539389	0.0519346	0.0634048	0.18811	0.176957	0.206765	0.178604	0.170149	0.209097	0.183752	0.180648	0.191662	0.166729	0.161631	0.176137	0.13129	0.144281	0.153546	0.144554	0.146378	0.144553	0.119752	0.145995	0.136792	0.132682	0.142399	0.131948
134	0.0937939	0.086082	0.128078	0.0876342	0.0807861	0.132229	0.0720793	0.0688345	0.104039	0.0682785	0.0645697	0.0964483	0.0717687	0.073369	0.0822249	0.0721252	0.0695301	0.0781342	0.0539112	0.0502054	0.0613878	0.0524628	0.0467309	0.0562811	0.19749	0.180046	0.215077	0.180215	0.166449	0.207394	0.175438	0.172029	0.187891	0.17005	0.151998	0.176286	0.143836	0.161193	0.156857	0.143087	0.147899	0.159958	0.132197	0.126809	0.135404	0.12188	0.127908	0.116081
135	0.0993123	0.0846365	0.125183	0.0890031	0.0784913	0.118986	0.0751055	0.0767531	0.110925	0.0659222	0.0585802	0.0946454	0.0695909	0.0699654	0.0795743	0.070894	0.0706283	0.0799779	0.0474283	0.0484807	0.0530363	0.0419304	0.050818	0.0571589	0.184786	0.17753	0.19992	0.181623	0.165558	0.198605	0.152378	0.153671	0.166757	0.15536	0.149034	0.160494	0.141416	0.1486	0.159765	0.141427	0.145255	0.154383	0.115249	0.121697	0.125898	0.115639	0.111328	0.113042
136	0.0966847	0.0896339	0.119305	0.0878306	0.0827868	0.121466	0.0805255	0.0715544	0.115063	0.0693584	0.0578501	0.102093	0.0720983	0.079361	0.0824741	0.0683563	0.0742387	0.0782452	0.0512039	0.0491951	0.0603568	0.0526211	0.0531064	0.0565519	0.187867	0.186479	0.219736	0.182777	0.182805	0.212706	0.165416	0.152049	0.172306	0.152711	0.137505	0.161365	0.139935	0.161103	0.163268	0.135028	0.142415	0.15056	0.116406	0.137954	0.11278	0.114315	0.118224	0.116256
137	0.0948568	0.0921484	0.127684	0.0956904	0.0810578	0.118559	0.068649	0.0668338	0.106736	0.068377	0.0677396	0.101626	0.0721818	0.0673174	0.0803352	0.0717815	0.0716277	0.0812349	0.0537762	0.0537025	0.0562024	0.059051	0.0515355	0.060211	0.180146	0.179371	0.202655	0.171128	0.168008	0.193971	0.170013	0.161342	0.186491	0.159243	0.141317	0.174609	0.145886	0.151892	0.14852	0.133124	0.140749	0.150396	0.123164	0.127277	0.12351	0.127158	0.124792	0.11267
138	0.0997502	0.0922687	0.130854	0.0951656	0.0796497	0.12551	0.0672786	0.0635329	0.106372	0.0563168	0.0544931	0.101566	0.0748632	0.0788699	0.0835285	0.0728257	0.0742178	0.0867477	0.0441918	0.0480203	0.0555688	0.0443344	0.058576	0.0540457	0.171497	0.163047	0.220989	0.174573	0.155905	0.196089	0.158936	0.174158	0.183949	0.163169	0.154558	0.16118	0.137656	0.143287	0.146517	0.13223	0.141824	0.138611	0.121622	0.122714	0.113746	0.125847	0.116978	0.127012
139	0.0929301	0.0921779	0.12339	0.0926245	0.0811295	0.121434	0.0746312	0.0641838	0.109505	0.0720284	0.0657449	0.0903374	0.0698684	0.0752327	0.0811462	0.068505	0.0701029	0.0786176	0.0485814	0.0453032	0.0609103	0.0448963	0.0396391	0.0609287	0.186645	0.169103	0.197215	0.16363	0.15553	0.197007	0.174505	0.153868	0.171151	0.175819	0.139937	0.169562	0.142917	0.137868	0.147604	0.134812	0.13614	0.146592	0.122932	0.131361	0.127178	0.114635	0.116043	0.118785
140	0.100794	0.0898167	0.127481	0.0949849	0.0842528	0.124857	0.0760978	0.0761287	0.100212	0.0752775	0.0638989	0.0891391	0.0732373	0.0772701	0.0861364	0.0730898	0.0729087	0.079755	0.0572689	0.0589079	0.0667875	0.0504754	0.049475	0.0586566	0.180506	0.171458	0.20214	0.16705	0.158546	0.20557	0.15281	0.15932	0.181551	0.156115	0.15311	0.1731	0.136179	0.147485	0.14983	0.135376	0.137061	0.149525	0.115583	0.123143	0.12488	0.116143	0.103125	0.119102
141	0.100665	0.0965311	0.127186	0.0956369	0.0903489	0.124354	0.0666499	0.0708227	0.103336	0.0674536	0.0711768	0.100342	0.0760569	0.0825005	0.0870033	0.0713212	0.0741286	0.081163	0.0530683	0.0551804	0.0618574	0.0525065	0.0540298	0.0586436	0.179407	0.174004	0.207126	0.163063	0.154044	0.189565	0.159801	0.157215	0.166584	0.151791	0.138505	0.164944	0.136101	0.145858	0.144534	0.13148	0.137635	0.139145	0.115946	0.122896	0.107506	0.109866	0.112931	0.11932
142	0.102709	0.0882743	0.130156	0.100872	0.0836931	0.115623	0.081418	0.0596606	0.104066	0.0626217	0.0606957	0.096836	0.0767243	0.0767319	0.0872735	0.0766837	0.0719611	0.0855658	0.0536054	0.054212	0.0596933	0.0536334	0.0509941	0.0629882	0.176746	0.16603	0.193125	0.16582	0.151852	0.194641	0.165703	0.168256	0.167254	0.157498	0.14217	0.173008	0.133528	0.145603	0.137846	0.133114	0.13302	0.141201	0.123569	0.144338	0.12143	0.115576	0.119795	0.127512
143	0.094782	0.0863545	0.124935	0.0916382	0.0814477	0.116331	0.0880618	0.072292	0.1064	0.0771089	0.073102	0.109164	0.0712801	0.0733029	0.083808	0.0706915	0.0693214	0.0756959	0.0575458	0.0610477	0.062215	0.0550489	0.0635681	0.0578138	0.161963	0.161434	0.199526	0.161976	0.15078	0.195138	0.153202	0.15739	0.183446	0.141193	0.142017	0.177347	0.126035	0.142171	0.142261	0.127985	0.132377	0.134428	0.120726	0.130553	0.12316	0.123946	0.118468	0.116682
144	0.0994952	0.0914665	0.12898	0.0904751	0.0827137	0.119802	0.074352	0.0750945	0.109151	0.0653923	0.0663553	0.0955311	0.0704536	0.0753021	0.0805388	0.0705922	0.068892	0.0808468	0.058836	0.0610022	0.0645468	0.05236	0.0414192	0.0590967	0.168131	0.16225	0.19607	0.164199	0.137394	0.191983	0.155906	0.14848	0.168312	0.147484	0.132664	0.167748	0.128274	0.142768	0.141801	0.129289	0.134084	0.13253	0.11432	0.130263	0.109285	0.111743	0.108671	0.129317
145	0.0992103	0.0932076	0.124214	0.104227	0.08383	0.121462	0.0651014	0.0657418	0.0998479	0.0746987	0.0625501	0.0917672	0.0751048	0.073561	0.0875522	0.0774186	0.0774995	0.0812988	0.055151	0.0521821	0.0578108	0.0488308	0.0500406	0.0577987	0.168722	0.159568	0.192434	0.161607	0.150382	0.192822	0.158953	0.145578	0.170977	0.141172	0.146798	0.173372	0.13183	0.145668	0.135994	0.123266	0.133923	0.133661	0.121341	0.124056	0.121468	0.125128	0.12413	0.111269
146	0.0987349	0.0936985	0.128614	0.102944	0.0864285	0.125263	0.0781263	0.0791298	0.0955235	0.0821724	0.0722521	0.105477	0.0834707	0.0735289	0.0918942	0.0788885	0.0775239	0.0850265	0.06187	0.0581396	0.0626327	0.0568787	0.0565201	0.0582727	0.174404	0.164583	0.189584	0.165225	0.15348	0.194087	0.163718	0.161524	0.169009	0.156404	0.144225	0.177732	0.125486	0.132567	0.142274	0.132193	0.125517	0.146362	0.137213	0.133435	0.12432	0.124527	0.135283	0.124415
147	0.107662	0.0921967	0.124798	0.100174	0.0924275	0.122604	0.0681998	0.0748381	0.0978606	0.0713059	0.0587089	0.0905275	0.0813936	0.0832106	0.0867345	0.0786503	0.0761716	0.0830295	0.0505845	0.0501057	0.0622148	0.0572659	0.0513796	0.0603353	0.165396	0.164721	0.193348	0.156933	0.151983	0.189792	0.150593	0.134915	0.149084	0.145172	0.133755	0.165263	0.132949	0.138102	0.139435	0.129713	0.132312	0.135775	0.105563	0.114731	0.11222	0.0992566	0.119566	0.106797
148	0.0978454	0.0927844	0.125811	0.0958751	0.0811124	0.121697	0.0712291	0.0774203	0.0994155	0.0716476	0.0649357	0.103188	0.0785061	0.0768047	0.0866354	0.0719689	0.0778173	0.0848904	0.0550909	0.062947	0.0616873	0.0477015	0.0536863	0.0603241	0.160275	0.15185	0.183166	0.153154	0.137436	0.188352	0.157094	0.159608	0.164028	0.138658	0.147884	0.156706	0.127307	0.136613	0.137747	0.121587	0.128794	0.133322	0.129467	0.132548	0.120631	0.12875	0.128145	0.112244
149	0.104927	0.0917913	0.122164	0.0914361	0.0877618	0.120044	0.08085	0.088168	0.097564	0.0718582	0.0664287	0.100169	0.0815857	0.0791825	0.0842061	0.0841928	0.0820429	0.0843013	0.0599892	0.0550605	0.0586624	0.0573715	0.0636354	0.0635193	0.171046	0.156229	0.188397	0.164948	0.13951	0.187429	0.161689	0.149286	0.174797	0.153554	0.13539	0.155	0.126761	0.13941	0.143447	0.124594	0.129549	0.1398	0.107494	0.11532	0.12174	0.108472	0.120918	0.116635
150	0.0991356	0.0928374	0.122598	0.0927775	0.0846302	0.113708	0.0774553	0.0801557	0.102797	0.0787375	0.075493	0.0994767	0.0809809	0.0763335	0.0886379	0.0821579	0.0797698	0.0806857	0.0577445	0.0617395	0.0636377	0.0640068	0.0617933	0.0714175	0.172965	0.162357	0.195824	0.158725	0.137828	0.183591	0.155005	0.144654	0.158085	0.15199	0.13816	0.160702	0.13475	0.133079	0.133101	0.12833	0.134912	0.133624	0.13139	0.13049	0.125828	0.126931	0.132803	0.129051
